# Supplementary material for: lncRNA-ZFAS1, an emerging gate-keeper in DNA damage-dependent transcriptional regulation
Source: Research Square preprint supplement (doi:10.21203/rs.3.rs-3233912/v1), 2023-09-13
Supplement: Supplementary file 2 [file 1271960bd6987c3cd0da334e.xlsx]

## Sheet: Ctrl_filter.PeakAnno
seqnames	start	end	width	strand	V4	V5	V6	annotation	geneChr	geneStart	geneEnd	geneLength	geneStrand	geneId	transcriptId	distanceToTSS	ENSEMBL	SYMBOL	GENENAME
chr11	497824	499317	1494	*	Peak_1	1000	.	Promoter (<=1kb)	11	494544	498929	4386	2	6050	ENST00000529768.5	0	ENSG00000023191	RNH1	ribonuclease/angiogenin inhibitor 1
chr11	499648	500142	495	*	Peak_2	1000	.	Promoter (<=1kb)	11	494544	498929	4386	2	6050	ENST00000529768.5	-719	ENSG00000023191	RNH1	ribonuclease/angiogenin inhibitor 1
chr11	500344	500793	450	*	Peak_3	1000	.	Promoter (1-2kb)	11	494544	498929	4386	2	6050	ENST00000529768.5	-1415	ENSG00000023191	RNH1	ribonuclease/angiogenin inhibitor 1
chr11	494549	495195	647	*	Peak_4	1000	.	3' UTR	11	494544	498929	4386	2	6050	ENST00000529768.5	3734	ENSG00000023191	RNH1	ribonuclease/angiogenin inhibitor 1
chr14	20801501	20802090	590	*	Peak_5	1000	.	Promoter (<=1kb)	14	20801356	20802406	1051	2	6035	ENST00000412779.2	316	ENSG00000129538	RNASE1	ribonuclease A family member 1, pancreatic
chr20	49277974	49284586	6613	*	Peak_6	1000	.	Promoter (<=1kb)	20	49280319	49280409	91	1	100113393	ENST00000410433.1	0	ENSG00000222365	SNORD12B	small nucleolar RNA, C/D box 12B
chr11	501920	502298	379	*	Peak_7	809	.	Promoter (<=1kb)	11	499677	502215	2539	2	6050	ENST00000531223.1	0	ENSG00000023191	RNH1	ribonuclease/angiogenin inhibitor 1
chr20	49288544	49290429	1886	*	Peak_14	341	.	Exon (ENST00000371743.7/441951, exon 5 of 5)	20	49280683	49280772	90	1	692057	ENST00000391002.1	7861	ENSG00000212304	SNORD12	small nucleolar RNA, C/D box 12
chr11	1095077	1095660	584	*	Peak_15	297	.	Exon (ENST00000361558.7/4583, exon 30 of 49)	11	1102455	1103456	1002	1	4583	ENST00000616479.1	-6795	ENSG00000198788	MUC2	mucin 2, oligomeric mucus/gel-forming
chr17	50070966	50072383	1418	*	Peak_38	187	.	Promoter (<=1kb)	17	50071740	50074211	2472	1	3675	ENST00000505552.1	0	ENSG00000005884	ITGA3	integrin subunit alpha 3
chr7	151778178	151779150	973	*	Peak_44	182	.	Intron (ENST00000287878.8/51422, intron 3 of 15)	7	151675548	151790632	115085	2	51422	ENST00000461529.1	11482	ENSG00000106617	PRKAG2	protein kinase AMP-activated non-catalytic subunit gamma 2
chr12	49821117	49822239	1123	*	Peak_87	146	.	Intron (ENST00000335999.6/57701, intron 1 of 12)	12	49791146	49828425	37280	2	57701	ENST00000335999.6	6186	ENSG00000167566	NCKAP5L	NCK associated protein 5 like
chr6	31577115	31577548	434	*	Peak_96	142	.	Promoter (1-2kb)	6	31575567	31578336	2770	1	7124	ENST00000449264.2	1548	ENSG00000232810	TNF	tumor necrosis factor
chr8	57209660	57210423	764	*	Peak_111	136	.	Intron (ENST00000519241.5/100507651, intron 3 of 3)	8	57218276	57219567	1292	1	100507651	ENST00000520929.1	-7853	ENSG00000253301	LINC01606	long intergenic non-protein coding RNA 1606
chr17	38874524	38875271	748	*	Peak_128	132	.	Promoter (<=1kb)	17	38873890	38915141	41252	1	3927	ENST00000419929.1	634	ENSG00000002834	LASP1	LIM and SH3 protein 1
chr11	94236341	94236855	515	*	Peak_199	108	.	Distal Intergenic	11	94305592	94307692	2101	1	390243	ENST00000328458.5	-68737	ENSG00000183560	IZUMO1R	IZUMO1 receptor, JUNO
chr20	44221423	44221975	553	*	Peak_209	107	.	Intron (ENST00000439943.5/100505783, intron 2 of 2)	20	44214898	44225071	10174	1	100505783	ENST00000623343.1	6525	ENSG00000223891	OSER1-DT	OSER1 divergent transcript
chr2	209306925	209307696	772	*	Peak_225	103	.	Distal Intergenic	2	209424058	209730518	306461	1	4133	ENST00000199940.10	-116362	ENSG00000078018	MAP2	microtubule associated protein 2
chr5	66063151	66063648	498	*	Peak_243	101	.	Intron (ENST00000284037.9/55914, intron 21 of 25)	5	66068877	66075230	6354	1	55914	ENST00000512354.1	-5229	ENSG00000112851	ERBIN	erbb2 interacting protein
chr11	11560715	11561161	447	*	Peak_244	101	.	Intron (ENST00000227756.4/374378, intron 1 of 10)	11	11475177	11621758	146582	2	374378	ENST00000526064.1	60597	ENSG00000110328	GALNT18	polypeptide N-acetylgalactosaminyltransferase 18
chr22	29733480	29734398	919	*	Peak_257	98	.	Intron (ENST00000344318.3/55954, intron 5 of 5)	22	29720084	29731839	11756	1	164633	ENST00000216144.3	13396	ENSG00000100314	CABP7	calcium binding protein 7
chr12	21393	21687	295	*	Peak_291	96	.	Intron (ENST00000400706.3/100288778, intron 2 of 10)	12	14522	32015	17494	2	100288778	ENST00000400706.3	10328	ENSG00000226210	WASH8P	WAS protein family homolog 8, pseudogene
chr1	229108224	229108701	478	*	Peak_294	95	.	Distal Intergenic	1	229258281	229271003	12723	2	105373159	ENST00000429227.1	162302	NA	LOC105373159	uncharacterized LOC105373159
chr13	38779810	38780207	398	*	Peak_333	90	.	Intron (ENST00000280481.8/341640, intron 4 of 23)	13	38821696	38850235	28540	1	341640	ENST00000482551.1	-41489	ENSG00000150893	FREM2	FRAS1 related extracellular matrix 2
chr2	214763795	214764067	273	*	Peak_345	90	.	Intron (ENST00000260947.8/580, intron 6 of 10)	2	214745712	214752478	6767	2	580	ENST00000465841.1	-11317	ENSG00000138376	BARD1	BRCA1 associated RING domain 1
chr17	16806467	16806926	460	*	Peak_335	90	.	Intron (ENST00000602730.1/162632, intron 7 of 10)	17	16798009	16804455	6447	1	162632	ENST00000341745.3	8458	ENSG00000188933	USP32P1	ubiquitin specific peptidase 32 pseudogene 1
chr19	48727980	48728226	247	*	Peak_360	89	.	Promoter (2-3kb)	19	48720587	48725581	4995	2	54922	ENST00000601530.1	-2399	ENSG00000105538	RASIP1	Ras interacting protein 1
chr20	49291289	49291588	300	*	Peak_375	88	.	Intron (ENST00000620594.1/441951, intron 4 of 4)	20	49280683	49280772	90	1	692057	ENST00000391002.1	10606	ENSG00000212304	SNORD12	small nucleolar RNA, C/D box 12
chr22	20751725	20752441	717	*	Peak_392	87	.	Promoter (<=1kb)	22	20747484	20751680	4197	2	5297	ENST00000475414.1	-45	ENSG00000241973	PI4KA	phosphatidylinositol 4-kinase alpha
chr1	85584025	85584609	585	*	Peak_414	85	.	Promoter (2-3kb)	1	85581200	85582099	900	1	3491	ENST00000480413.1	2825	ENSG00000142871	CCN1	cellular communication network factor 1
chr10	47408687	47409344	658	*	Peak_431	84	.	Distal Intergenic	10	47365496	47384273	18778	2	118738	ENST00000585316.2	-24414	ENSG00000265763	ZNF488	zinc finger protein 488
chr11	94237711	94238795	1085	*	Peak_436	83	.	Exon (ENST00000506309.6/ENST00000506309.6, exon 1 of 3)	11	94305592	94307692	2101	1	390243	ENST00000328458.5	-66797	ENSG00000183560	IZUMO1R	IZUMO1 receptor, JUNO
chr3	125207855	125208356	502	*	Peak_450	82	.	Intron (ENST00000393469.8/84561, intron 1 of 12)	3	125082638	125211399	128762	2	84561	ENST00000393469.8	3043	ENSG00000221955	SLC12A8	solute carrier family 12 member 8
chr6	160634640	160634971	332	*	Peak_472	82	.	Intron (ENST00000316300.9/4018, intron 7 of 38)	6	160617116	160640850	23735	2	4018	ENST00000614786.1	5879	ENSG00000198670	LPA	lipoprotein(a)
chr8	94636864	94637371	508	*	Peak_488	81	.	Promoter (2-3kb)	8	94637285	94639467	2183	2	100288748	ENST00000562760.1	2096	ENSG00000261437	LOC100288748	uncharacterized LOC100288748
chr11	86091899	86092220	322	*	Peak_500	80	.	Distal Intergenic	11	85958839	86069882	111044	2	8301	ENST00000528398.5	-22017	ENSG00000073921	PICALM	phosphatidylinositol binding clathrin assembly protein
chr1	232564312	232564692	381	*	Peak_502	80	.	Promoter (2-3kb)	1	232397965	232561558	163594	2	57568	ENST00000366630.5	-2754	ENSG00000116991	SIPA1L2	signal induced proliferation associated 1 like 2
chr8	134454680	134455061	382	*	Peak_510	80	.	Distal Intergenic	8	134478222	134510182	31961	2	57623	ENST00000521673.5	55121	ENSG00000066827	ZFAT	zinc finger and AT-hook domain containing
chr5	82948595	82949131	537	*	Peak_521	79	.	Distal Intergenic	5	82850864	82859836	8973	2	102546175	ENST00000627179.1	-88759	ENSG00000281327	LINC01338	long intergenic non-protein coding RNA 1338
chr8	125598522	125598955	434	*	Peak_570	77	.	Distal Intergenic	8	125433546	125437191	3646	1	10221	ENST00000519576.1	164976	ENSG00000173334	TRIB1	tribbles pseudokinase 1
chr20	47178403	47178670	268	*	Peak_573	76	.	Intron (ENST00000327619.9/2139, intron 12 of 15)	20	47166967	47167058	92	1	100500814	ENST00000584070.1	11436	ENSG00000264901	MIR3616	microRNA 3616
chr19	12571510	12571891	382	*	Peak_609	75	.	Intron (ENST00000593682.1/163050, intron 1 of 3)	19	12525720	12580975	55256	2	163050	ENST00000593682.1	9084	ENSG00000249709	ZNF564	zinc finger protein 564
chr10	100424063	100424372	310	*	Peak_612	75	.	Intron (ENST00000641571.1/90271, intron 3 of 5)	10	100463041	100483744	20704	1	7479	ENST00000343737.5	-38669	ENSG00000075290	WNT8B	Wnt family member 8B
chr12	11964851	11965190	340	*	Peak_624	75	.	Distal Intergenic	12	11885937	11891610	5674	1	2120	ENST00000266427.3	78914	ENSG00000139083	ETV6	ETS variant 6
chr4	28257564	28257876	313	*	Peak_651	75	.	Distal Intergenic	4	28819582	28819668	87	1	100422937	ENST00000636486.1	-561706	ENSG00000283275	MIR4275	microRNA 4275
chr7	17503252	17503578	327	*	Peak_664	75	.	Intron (ENST00000636929.1/101927630, intron 1 of 10)	7	17405479	17524175	118697	2	101927630	ENST00000636929.1	20597	ENSG00000236039	LOC101927630	uncharacterized LOC101927630
chr7	22679868	22680809	942	*	Peak_665	75	.	Intron (ENST00000650428.1/541472, intron 1 of 2)	7	22649960	22665533	15574	2	401312	ENST00000414116.1	-14335	ENSG00000105889	LOC401312	uncharacterized LOC401312
chr7	1269946	1270293	348	*	Peak_663	75	.	Distal Intergenic	7	1232907	1237318	4412	1	340260	ENST00000316333.8	37039	ENSG00000164853	UNCX	UNC homeobox
chr3	168601197	168601500	304	*	Peak_649	75	.	Intron (ENST00000431685.2/93556, intron 4 of 11)	3	168551854	168551949	96	1	693136	ENST00000384984.1	49343	ENSG00000207717	MIR551B	microRNA 551b
chr5	81075233	81075564	332	*	Peak_656	75	.	Intron (ENST00000265080.8/5924, intron 5 of 26)	5	81070024	81088564	18541	1	5924	ENST00000502677.1	5209	ENSG00000113319	RASGRF2	Ras protein specific guanine nucleotide releasing factor 2
chr11	62347461	62347961	501	*	Peak_680	74	.	Intron (ENST00000415229.6/80150, intron 2 of 6)	11	62357053	62383247	26195	1	80150	ENST00000528206.1	-9092	ENSG00000162174	ASRGL1	asparaginase like 1
chr6	131946978	131947281	304	*	Peak_698	73	.	Downstream (<1kb)	6	131948176	131951373	3198	2	1490	ENST00000367976.3	4092	ENSG00000118523	CCN2	cellular communication network factor 2
chr11	94637310	94637559	250	*	Peak_699	73	.	Intron (ENST00000536540.5/105369438, intron 4 of 4)	11	94617789	94621113	3325	1	143689	ENST00000537419.1	19521	ENSG00000134627	PIWIL4	piwi like RNA-mediated gene silencing 4
chr11	2259880	2260197	318	*	Peak_705	73	.	Distal Intergenic	11	2268495	2270952	2458	2	430	ENST00000331289.4	10755	ENSG00000183734	ASCL2	achaete-scute family bHLH transcription factor 2
chr17	65284382	65284734	353	*	Peak_708	73	.	Distal Intergenic	17	65188704	65227692	38989	1	8787	ENST00000577595.1	95678	ENSG00000108370	RGS9	regulator of G protein signaling 9
chr16	75204387	75204802	416	*	Peak_711	73	.	Promoter (<=1kb)	16	75204103	75205795	1693	2	440387	ENST00000562106.5	993	ENSG00000168928	CTRB2	chymotrypsinogen B2
chr2	215105478	215105888	411	*	Peak_721	73	.	Intron (ENST00000272895.11/26154, intron 2 of 52)	2	215075492	215138404	62913	2	26154	ENST00000412081.1	32516	ENSG00000144452	ABCA12	ATP binding cassette subfamily A member 12
chr9	134909573	134909925	353	*	Peak_737	72	.	3' UTR	9	134905890	134917877	11988	2	2219	ENST00000616356.4	7952	ENSG00000085265	FCN1	ficolin 1
chr5	135067112	135067686	575	*	Peak_745	72	.	Intron (ENST00000624272.3/100996485, intron 2 of 5)	5	135038831	135040047	1217	2	101927953	ENST00000507035.2	-27065	ENSG00000249082	C5orf66-AS1	C5orf66 antisense RNA 1
chr10	112134115	112134544	430	*	Peak_747	72	.	Distal Intergenic	10	112153870	112183710	29841	2	57678	ENST00000369425.5	49166	ENSG00000119927	GPAM	glycerol-3-phosphate acyltransferase, mitochondrial
chr5	123565159	123565540	382	*	Peak_757	72	.	Intron (ENST00000345990.8/1456, intron 4 of 12)	5	123552965	123557564	4600	1	1456	ENST00000514131.1	12194	ENSG00000151292	CSNK1G3	casein kinase 1 gamma 3
chr8	143670153	143670632	480	*	Peak_762	72	.	Distal Intergenic	8	143684452	143691474	7023	1	286075	ENST00000532003.5	-13820	ENSG00000181135	ZNF707	zinc finger protein 707
chr1	24120940	24121547	608	*	Peak_766	71	.	Exon (ENST00000270800.1/58985, exon 7 of 7)	1	24056037	24112175	56139	2	127294	ENST00000374434.3	-8765	ENSG00000142661	MYOM3	myomesin 3
chr6	7796139	7796446	308	*	Peak_772	71	.	Intron (ENST00000283147.6/654, intron 1 of 6)	6	7726797	7881422	154626	1	654	ENST00000283147.6	69342	ENSG00000153162	BMP6	bone morphogenetic protein 6
chr1	25771176	25771859	684	*	Peak_777	71	.	Promoter (<=1kb)	1	25772069	25782700	10632	1	57134	ENST00000496532.5	-210	ENSG00000117643	MAN1C1	mannosidase alpha class 1C member 1
chr10	113590803	113591156	354	*	Peak_779	71	.	Exon (ENST00000369360.7/4892, exon 39 of 41)	10	113567484	113570158	2675	1	3026	ENST00000460714.1	23319	ENSG00000148702	HABP2	hyaluronan binding protein 2
chr5	149671537	149672204	668	*	Peak_807	70	.	Distal Intergenic	5	149626897	149632036	5140	1	389337	ENST00000509831.1	44640	ENSG00000183111	ARHGEF37	Rho guanine nucleotide exchange factor 37
chr1	16605638	16605963	326	*	Peak_819	70	.	Promoter (<=1kb)	1	16564853	16604934	40082	2	55672	ENST00000392963.5	-704	ENSG00000219481	NBPF1	NBPF member 1
chr19	4098607	4099026	420	*	Peak_841	69	.	Promoter (1-2kb)	19	4095388	4100072	4685	2	5605	ENST00000595715.1	1046	ENSG00000126934	MAP2K2	mitogen-activated protein kinase kinase 2
chr11	76281288	76281620	333	*	Peak_846	69	.	Distal Intergenic	11	76186325	76206532	20208	2	7481	ENST00000322563.7	-74756	ENSG00000085741	WNT11	Wnt family member 11
chr8	70440288	70440590	303	*	Peak_848	69	.	Distal Intergenic	8	70471134	70485687	14554	1	101926892	ENST00000520259.1	-30544	ENSG00000253967	LOC101926892	uncharacterized LOC101926892
chr15	65116388	65116672	285	*	Peak_870	68	.	Promoter (1-2kb)	15	65092770	65115197	22428	2	390595	ENST00000559089.5	-1191	ENSG00000246922	UBAP1L	ubiquitin associated protein 1 like
chr19	3892858	3893150	293	*	Peak_874	68	.	Intron (ENST00000598136.5/85300, intron 3 of 4)	19	3885768	3926316	40549	1	85300	ENST00000600960.1	7090	ENSG00000167654	ATCAY	ATCAY kinesin light chain interacting caytaxin
chr3	28314165	28314524	360	*	Peak_875	68	.	Promoter (1-2kb)	3	28315901	28319773	3873	1	152100	ENST00000469102.1	-1377	ENSG00000187118	CMC1	C-X9-C motif containing 1
chr2	6480360	6480635	276	*	Peak_881	68	.	Distal Intergenic	2	6366010	6375422	9413	2	101929390	ENST00000448901.1	-104938	ENSG00000227007	LINC01247	long intergenic non-protein coding RNA 1247
chr3	170824561	170824792	232	*	Peak_932	67	.	Intron (ENST00000486975.1/5010, intron 3 of 3)	3	170865794	170868181	2388	2	200916	ENST00000478578.1	43389	ENSG00000163584	RPL22L1	ribosomal protein L22 like 1
chr5	130863978	130864343	366	*	Peak_938	67	.	Distal Intergenic	5	131162478	131162627	150	2	3094	ENST00000520028.1	298284	ENSG00000169567	HINT1	histidine triad nucleotide binding protein 1
chr5	79789450	79789738	289	*	Peak_943	67	.	Intron (ENST00000446378.2/202333, intron 10 of 12)	5	79758753	79763419	4667	1	202333	ENST00000505466.1	30697	ENSG00000164309	CMYA5	cardiomyopathy associated 5
chr2	177877485	177877816	332	*	Peak_925	67	.	Intron (ENST00000286063.10/50940, intron 4 of 19)	2	177629246	177888738	259493	2	50940	ENST00000389683.7	10922	ENSG00000128655	PDE11A	phosphodiesterase 11A
chr10	99569740	99570055	316	*	Peak_898	67	.	Distal Intergenic	10	99532953	99536521	3569	1	159296	ENST00000622383.1	36787	ENSG00000119919	NKX2-3	NK2 homeobox 3
chr5	167123241	167123490	250	*	Peak_939	67	.	Distal Intergenic	5	167164934	167168401	3468	2	101927908	ENST00000518330.1	44911	ENSG00000253469	LOC101927908	uncharacterized LOC101927908
chr6	14012718	14013023	306	*	Peak_971	67	.	Distal Intergenic	6	13925193	13980008	54816	1	221687	ENST00000537388.1	87525	ENSG00000180537	RNF182	ring finger protein 182
chr3	52782757	52783018	262	*	Peak_996	67	.	Promoter (1-2kb)	3	52784412	52792033	7622	1	3697	ENST00000428133.5	-1394	ENSG00000055957	ITIH1	inter-alpha-trypsin inhibitor heavy chain 1
chr11	84993042	84993435	394	*	Peak_1000	66	.	Intron (ENST00000376104.6/1740, intron 6 of 27)	11	83455012	84923589	1468578	2	1740	ENST00000398309.6	-69453	ENSG00000150672	DLG2	discs large MAGUK scaffold protein 2
chr16	58462692	58463412	721	*	Peak_1019	66	.	Promoter (<=1kb)	16	58462846	58504649	41804	1	65009	ENST00000568999.5	0	ENSG00000103034	NDRG4	NDRG family member 4
chr5	82018853	82019104	252	*	Peak_1023	66	.	Intron (ENST00000355178.8/83734, intron 2 of 3)	5	81987558	82252713	265156	1	83734	ENST00000513634.1	31295	ENSG00000152348	ATG10	autophagy related 10
chr11	94106577	94107099	523	*	Peak_1025	66	.	Intron (ENST00000315765.9/341208, intron 17 of 19)	11	94128928	94181972	53045	1	24145	ENST00000227638.7	-21829	ENSG00000110218	PANX1	pannexin 1
chr8	56933729	56933987	259	*	Peak_1051	66	.	Distal Intergenic	8	56963926	56980112	16187	2	54928	ENST00000520392.1	46125	ENSG00000104331	IMPAD1	inositol monophosphatase domain containing 1
chr7	606968	607197	230	*	Peak_1059	65	.	Intron (ENST00000429872.1/101926963, intron 1 of 1)	7	603185	608482	5298	1	101926963	ENST00000429872.1	3783	NA	LOC101926963	uncharacterized LOC101926963
chr5	38063253	38063596	344	*	Peak_1061	65	.	Intron (ENST00000513039.2/105374731, intron 2 of 2)	5	38025697	38183932	158236	1	105374731	ENST00000513039.2	37556	ENSG00000248461	LINC02107	long intergenic non-protein coding RNA 2107
chr6	21347488	21347837	350	*	Peak_1062	65	.	Distal Intergenic	6	21200812	21231441	30630	1	54901	ENST00000476517.1	146676	ENSG00000145996	CDKAL1	CDK5 regulatory subunit associated protein 1 like 1
chr6	143381840	143382139	300	*	Peak_1087	65	.	Distal Intergenic	6	143422832	143441977	19146	2	134637	ENST00000606514.5	59838	ENSG00000189007	ADAT2	adenosine deaminase tRNA specific 2
chr1	15944571	15944941	371	*	Peak_1101	64	.	Promoter (<=1kb)	1	15942407	15944428	2022	2	7709	ENST00000444358.1	-143	ENSG00000116809	ZBTB17	zinc finger and BTB domain containing 17
chr22	41332252	41332629	378	*	Peak_1109	64	.	Exon (ENST00000486331.1/23264, exon 7 of 7)	22	41301715	41336843	35129	1	23264	ENST00000486331.1	30537	ENSG00000100403	ZC3H7B	zinc finger CCCH-type containing 7B
chr5	174316342	174316744	403	*	Peak_1121	64	.	Distal Intergenic	5	174336295	174526448	190154	1	101928176	ENST00000515513.5	-19551	ENSG00000249306	LINC01411	long intergenic non-protein coding RNA 1411
chr3	44067969	44068256	288	*	Peak_1138	64	.	Distal Intergenic	3	44114212	44114310	99	1	406929	ENST00000385219.1	-45956	ENSG00000207954	MIR138-1	microRNA 138-1
chr5	77438316	77438614	299	*	Peak_1142	64	.	Promoter (2-3kb)	5	77426652	77436279	9628	2	55255	ENST00000512033.1	-2037	ENSG00000164253	WDR41	WD repeat domain 41
chr14	68603637	68603930	294	*	Peak_1135	64	.	Intron (ENST00000487861.5/5890, intron 10 of 10)	14	68627166	68628445	1280	2	100996664	ENST00000556301.1	24515	NA	LOC100996664	uncharacterized LOC100996664
chr6	17208439	17208865	427	*	Peak_1155	64	.	Distal Intergenic	6	17281346	17293875	12530	1	221662	ENST00000379052.9	-72481	ENSG00000112183	RBM24	RNA binding motif protein 24
chr1	211514115	211514380	266	*	Peak_1159	64	.	Distal Intergenic	1	211476522	211492917	16396	2	343035	ENST00000367002.4	-21198	ENSG00000198570	RD3	retinal degeneration 3, GUCY2D regulator
chr20	32098894	32099211	318	*	Peak_1168	64	.	3' UTR	20	32109506	32167258	57753	1	9777	ENST00000398022.6	-10295	ENSG00000101337	TM9SF4	transmembrane 9 superfamily member 4
chr10	118949725	118950365	641	*	Peak_1164	64	.	Distal Intergenic	10	119029716	119033732	4017	1	340719	ENST00000425699.2	-79351	ENSG00000188613	NANOS1	nanos C2HC-type zinc finger 1
chr7	44537252	44537556	305	*	Peak_1183	63	.	Intron (ENST00000289547.8/29881, intron 2 of 19)	7	44512535	44541315	28781	2	29881	ENST00000289547.8	3759	ENSG00000015520	NPC1L1	NPC1 like intracellular cholesterol transporter 1
chr1	54836445	54836830	386	*	Peak_1185	63	.	Intron (ENST00000358193.7/163747, intron 9 of 10)	1	54806102	54842252	36151	1	163747	ENST00000371273.3	30343	ENSG00000162398	LEXM	lymphocyte expansion molecule
chr11	101312262	101312593	332	*	Peak_1195	63	.	Distal Intergenic	11	101453641	101455577	1937	2	7225	ENST00000532184.1	142984	ENSG00000137672	TRPC6	transient receptor potential cation channel subfamily C member 6
chr17	1982826	1983074	249	*	Peak_1202	63	.	Intron (ENST00000331238.6/146760, intron 1 of 1)	17	2017716	2019102	1387	1	105371485	ENST00000572287.1	-34642	ENSG00000228133	LOC105371485	uncharacterized LOC105371485
chr12	132170636	132170952	317	*	Peak_1201	63	.	Distal Intergenic	12	132186735	132189695	2961	2	100996246	ENST00000538731.2	18743	ENSG00000256576	LINC02361	long intergenic non-protein coding RNA 2361
chr20	49284817	49285391	575	*	Peak_1206	63	.	Intron (ENST00000371743.7/441951, intron 4 of 4)	20	49280683	49280772	90	1	692057	ENST00000391002.1	4134	ENSG00000212304	SNORD12	small nucleolar RNA, C/D box 12
chr1	51794430	51795134	705	*	Peak_1208	63	.	Promoter (<=1kb)	1	51794472	51795708	1237	2	4898	ENST00000475310.5	574	ENSG00000078618	NRDC	nardilysin convertase
chr1	156060682	156061066	385	*	Peak_1218	63	.	Promoter (<=1kb)	1	156061160	156070514	9355	1	57111	ENST00000361084.9	-94	ENSG00000132698	RAB25	RAB25, member RAS oncogene family
chr1	53554644	53554911	268	*	Peak_1232	62	.	Intron (ENST00000312233.4/148979, intron 3 of 9)	1	53459976	53464679	4704	1	63948	ENST00000463126.1	94668	ENSG00000143006	DMRTB1	DMRT like family B with proline rich C-terminal 1
chr17	31659551	31659961	411	*	Peak_1246	62	.	Distal Intergenic	17	31575411	31575521	111	1	100126356	ENST00000362317.1	84140	ENSG00000283978	MIR365B	microRNA 365b
chr1	44588011	44588621	611	*	Peak_1262	62	.	Intron (ENST00000355387.6/55182, intron 2 of 14)	1	44614265	44627057	12793	1	55182	ENST00000496262.1	-25644	ENSG00000187147	RNF220	ring finger protein 220
chr8	81303222	81303490	269	*	Peak_1266	62	.	Distal Intergenic	8	81283326	81284415	1090	1	2171	ENST00000481695.1	19896	ENSG00000164687	FABP5	fatty acid binding protein 5
chr6	5483888	5484318	431	*	Peak_1281	61	.	Intron (ENST00000324331.10/10667, intron 4 of 6)	6	5452468	5458075	5608	2	101927972	ENST00000602284.1	-25813	ENSG00000269985	LOC101927972	uncharacterized LOC101927972
chr22	17851660	17851923	264	*	Peak_1306	61	.	Intron (ENST00000441493.6/57553, intron 19 of 31)	22	17819022	17832000	12979	2	57553	ENST00000498573.5	-19660	ENSG00000243156	MICAL3	microtubule associated monooxygenase, calponin and LIM domain containing 3
chr5	33201839	33202251	413	*	Peak_1314	61	.	Intron (ENST00000510327.1/ENST00000510327.1, intron 2 of 2)	5	33229735	33255553	25819	1	105374716	ENST00000503577.1	-27484	ENSG00000251443	LINC02160	long intergenic non-protein coding RNA 2160
chr9	130386044	130386381	338	*	Peak_1318	61	.	Promoter (1-2kb)	9	130384449	130419582	35134	1	256158	ENST00000487727.6	1595	ENSG00000148357	HMCN2	hemicentin 2
chr5	149756570	149756841	272	*	Peak_1319	61	.	Intron (ENST00000360453.8/133522, intron 1 of 10)	5	149771940	149847627	75688	1	133522	ENST00000403750.5	-15099	ENSG00000155846	PPARGC1B	PPARG coactivator 1 beta
chr6	30445460	30445725	266	*	Peak_1343	60	.	Distal Intergenic	6	30489467	30494205	4739	1	3133	ENST00000376630.4	-43742	ENSG00000204592	HLA-E	major histocompatibility complex, class I, E
chr6	19403665	19403944	280	*	Peak_1593	60	.	Intron (ENST00000636202.1/ENST00000636202.1, intron 7 of 9)	6	19730427	19734567	4141	2	100506885	ENST00000445568.1	330623	ENSG00000228412	LOC100506885	uncharacterized LOC100506885
chr13	40463917	40464310	394	*	Peak_1425	60	.	Intron (ENST00000637523.1/646982, intron 3 of 10)	13	40452657	40460409	7753	2	646982	ENST00000400431.2	-3508	ENSG00000215483	LINC00598	long intergenic non-protein coding RNA 598
chr21	37651390	37651641	252	*	Peak_1502	60	.	Intron (ENST00000609713.1/3763, intron 3 of 3)	21	37501326	37512064	10739	1	1859	ENST00000646351.1	150064	ENSG00000157540	DYRK1A	dual specificity tyrosine phosphorylation regulated kinase 1A
chr18	35399499	35399791	293	*	Peak_1473	60	.	Distal Intergenic	18	35373899	35377337	3439	2	252884	ENST00000585522.1	-22162	ENSG00000186496	ZNF396	zinc finger protein 396
chr17	63877073	63877374	302	*	Peak_1472	60	.	Downstream (2-3kb)	17	63872012	63873766	1755	2	1443	ENST00000560142.5	-3307	ENSG00000213218	CSH2	chorionic somatomammotropin hormone 2
chr19	50823767	50824052	286	*	Peak_1487	60	.	Promoter (<=1kb)	19	50819148	50823787	4640	2	3816	ENST00000593325.5	0	ENSG00000167748	KLK1	kallikrein 1
chr12	30816185	30816488	304	*	Peak_1411	60	.	Exon (ENST00000648050.1/100287314, exon 5 of 5)	12	30800211	30801997	1787	1	100287314	ENST00000551972.1	15974	NA	LINC00941	long intergenic non-protein coding RNA 941
chr3	167529288	167529528	241	*	Peak_1537	60	.	Promoter (1-2kb)	3	167522332	167531189	8858	2	151790	ENST00000493061.1	1661	ENSG00000174776	WDR49	WD repeat domain 49
chr13	27815262	27815539	278	*	Peak_1421	60	.	Distal Intergenic	13	27792643	27794768	2126	1	219409	ENST00000302945.2	22619	ENSG00000169840	GSX1	GS homeobox 1
chr12	55418159	55418437	279	*	Peak_1414	60	.	Distal Intergenic	12	55426254	55427192	939	1	390326	ENST00000328314.3	-7817	ENSG00000185821	OR6C76	olfactory receptor family 6 subfamily C member 76
chr6	137980365	137980684	320	*	Peak_1588	60	.	Distal Intergenic	6	137943079	137945802	2724	2	105378020	ENST00000417932.1	-34563	ENSG00000226004	LINC02528	long intergenic non-protein coding RNA 2528
chr14	54959530	54959815	286	*	Peak_1438	60	.	Intron (ENST00000360586.7/11169, intron 21 of 25)	14	54941271	54944607	3337	2	11169	ENST00000475379.1	-14923	ENSG00000198554	WDHD1	WD repeat and HMG-box DNA binding protein 1
chr18	46756638	46757010	373	*	Peak_1474	60	.	Promoter (<=1kb)	18	46667821	46756809	88989	2	29906	ENST00000538168.5	0	ENSG00000101638	ST8SIA5	ST8 alpha-N-acetyl-neuraminide alpha-2,8-sialyltransferase 5
chr15	74756850	74757150	301	*	Peak_1454	60	.	Distal Intergenic	15	74748844	74756202	7359	1	1544	ENST00000343932.4	8006	ENSG00000140505	CYP1A2	cytochrome P450 family 1 subfamily A member 2
chr6	8866845	8867216	372	*	Peak_1607	60	.	Intron (ENST00000643788.1/100506207, intron 3 of 6)	6	8783275	8786889	3615	1	100506207	ENST00000645808.1	83570	ENSG00000285219	LOC100506207	uncharacterized LOC100506207
chr11	59472158	59472435	278	*	Peak_1387	60	.	Distal Intergenic	11	59456938	59457991	1054	1	219983	ENST00000300127.2	15220	ENSG00000166884	OR4D6	olfactory receptor family 4 subfamily D member 6
chr16	914898	915163	266	*	Peak_1468	60	.	Intron (ENST00000262301.15/64788, intron 3 of 10)	16	921033	934266	13234	1	101929387	ENST00000567820.1	-5870	ENSG00000260439	LMF1-AS1	LMF1 antisense RNA 1
chr10	49084103	49084337	235	*	Peak_1369	60	.	Intron (ENST00000332853.8/196740, intron 3 of 7)	10	49064151	49077291	13141	2	196740	ENST00000476018.2	-6812	ENSG00000165633	VSTM4	V-set and transmembrane domain containing 4
chr5	116572421	116572672	252	*	Peak_1560	60	.	Promoter (1-2kb)	5	116550115	116574234	24120	2	57556	ENST00000512156.1	1562	ENSG00000092421	SEMA6A	semaphorin 6A
chr1	230489882	230490293	412	*	Peak_1410	60	.	Distal Intergenic	1	230314482	230426371	111890	2	79605	ENST00000391860.6	-63511	ENSG00000177614	PGBD5	piggyBac transposable element derived 5
chr1	217569366	217569627	262	*	Peak_1406	60	.	Intron (ENST00000366935.7/55105, intron 5 of 9)	1	217498180	217610379	112200	2	55105	ENST00000485274.1	40752	ENSG00000092978	GPATCH2	G-patch domain containing 2
chr5	140796616	140796976	361	*	Peak_1562	60	.	Promoter (1-2kb)	5	140794965	141012344	217380	1	56146	ENST00000526136.1	1651	ENSG00000204969	PCDHA2	protocadherin alpha 2
chr5	151389030	151389378	349	*	Peak_1563	60	.	Intron (ENST00000647906.1/ENST00000647906.1, intron 3 of 3)	5	151321885	151347590	25706	2	153201	ENST00000521967.1	-41440	ENSG00000186335	SLC36A2	solute carrier family 36 member 2
chr15	56716693	56716969	277	*	Peak_1450	60	.	Intron (ENST00000559237.5/54816, intron 1 of 20)	15	56652490	56707318	54829	2	54816	ENST00000560002.5	-9375	ENSG00000137871	ZNF280D	zinc finger protein 280D
chr2	119353801	119354059	259	*	Peak_1501	60	.	Intron (ENST00000409466.6/130355, intron 1 of 6)	2	119302444	119366682	64239	2	130355	ENST00000409523.1	12623	ENSG00000186132	C2orf76	chromosome 2 open reading frame 76
chr1	193358452	193358681	230	*	Peak_1395	60	.	Intron (ENST00000420807.1/101929184, intron 3 of 3)	1	193304745	193365953	61209	1	101929184	ENST00000420807.1	53707	ENSG00000232077	LINC01031	long intergenic non-protein coding RNA 1031
chr11	67878788	67879037	250	*	Peak_1389	60	.	Distal Intergenic	11	67796683	67805336	8654	2	645332	ENST00000525180.1	-73452	ENSG00000160172	FAM86C2P	family with sequence similarity 86, member A pseudogene
chr5	10057922	10058202	281	*	Peak_1554	60	.	Distal Intergenic	5	9641315	9903826	262512	2	285692	ENST00000511616.5	-154096	ENSG00000249781	LINC02112	long intergenic non-protein coding RNA 2112
chr6	67030941	67031227	287	*	Peak_1602	60	.	Distal Intergenic	6	68055351	68060502	5152	1	102723883	ENST00000449928.1	-1024124	ENSG00000223504	LOC102723883	uncharacterized LOC102723883
chr8	104820936	104821238	303	*	Peak_1645	60	.	Intron (ENST00000521923.5/ENST00000521923.5, intron 2 of 4)	8	104703719	105419260	715542	1	23414	ENST00000518180.1	117217	ENSG00000169946	ZFPM2	zinc finger protein, FOG family member 2
chr6	41376107	41376476	370	*	Peak_1648	60	.	Distal Intergenic	6	41335851	41350864	15014	1	9436	ENST00000373086.3	40256	ENSG00000096264	NCR2	natural cytotoxicity triggering receptor 2
chr17	59545106	59545430	325	*	Peak_1669	60	.	Distal Intergenic	17	59430869	59526946	96078	2	101927728	ENST00000584262.5	-18160	ENSG00000265313	LINC01476	long intergenic non-protein coding RNA 1476
chr5	40136842	40137207	366	*	Peak_1683	59	.	Distal Intergenic	5	40010912	40053324	42413	1	102467077	ENST00000507027.2	125930	NA	LINC00603	long intergenic non-protein coding RNA 603
chr20	38806226	38806556	331	*	Peak_1699	59	.	Promoter (<=1kb)	20	38805724	38923024	117301	1	26051	ENST00000373331.2	502	ENSG00000101445	PPP1R16B	protein phosphatase 1 regulatory subunit 16B
chr2	53955693	53955926	234	*	Peak_1728	59	.	Intron (ENST00000404125.5/23198, intron 1 of 46)	2	53936095	53970778	34684	2	23198	ENST00000481518.1	14852	ENSG00000068878	PSME4	proteasome activator subunit 4
chr8	140210273	140210538	266	*	Peak_1744	59	.	Intron (ENST00000648948.1/83696, intron 17 of 22)	8	139988740	140238493	249754	2	83696	ENST00000517667.5	27955	ENSG00000167632	TRAPPC9	trafficking protein particle complex 9
chr2	79537197	79537431	235	*	Peak_1729	59	.	Intron (ENST00000466387.5/1496, intron 5 of 21)	2	79514622	79858066	343445	1	1496	ENST00000409971.6	22575	ENSG00000066032	CTNNA2	catenin alpha 2
chr8	94126731	94127101	371	*	Peak_1750	59	.	Downstream (<1kb)	8	94145969	94162128	16160	2	1015	ENST00000520952.1	35027	ENSG00000079112	CDH17	cadherin 17
chr17	81688685	81689145	461	*	Peak_1762	59	.	Promoter (2-3kb)	17	81686267	81690830	4564	1	9146	ENST00000576087.1	2418	ENSG00000185359	HGS	hepatocyte growth factor-regulated tyrosine kinase substrate
chr3	157952230	157952473	244	*	Peak_1774	59	.	Distal Intergenic	3	158097080	158102887	5808	2	6474	ENST00000425436.7	150414	ENSG00000168779	SHOX2	short stature homeobox 2
chr19	2866896	2867548	653	*	Peak_1771	59	.	Promoter (<=1kb)	19	2867335	2877442	10108	1	80032	ENST00000586470.5	0	ENSG00000172000	ZNF556	zinc finger protein 556
chr10	86700669	86701051	383	*	Peak_1796	58	.	Intron (ENST00000429277.6/11155, intron 8 of 13)	10	86718730	86726451	7722	1	11155	ENST00000477489.1	-17679	ENSG00000122367	LDB3	LIM domain binding 3
chr12	95333623	95333928	306	*	Peak_1798	58	.	Intron (ENST00000636165.1/ENST00000636165.1, intron 7 of 7)	12	95309923	95309984	62	1	100500802	ENST00000579373.1	23700	ENSG00000265917	MIR3685	microRNA 3685
chr13	28740394	28740742	349	*	Peak_1805	58	.	Distal Intergenic	13	28700717	28718970	18254	2	283537	ENST00000380814.4	-21424	ENSG00000139508	SLC46A3	solute carrier family 46 member 3
chr5	129020699	129020935	237	*	Peak_1810	58	.	Intron (ENST00000262462.8/28965, intron 5 of 9)	5	128965528	129033282	67755	1	28965	ENST00000506176.1	55171	ENSG00000113396	SLC27A6	solute carrier family 27 member 6
chr2	96092370	96092911	542	*	Peak_1829	58	.	Distal Intergenic	2	96112875	96116245	3371	2	151	ENST00000620793.1	23334	ENSG00000274286	ADRA2B	adrenoceptor alpha 2B
chr6	42874598	42875099	502	*	Peak_1838	58	.	Distal Intergenic	6	42879618	42887301	7684	1	285855	ENST00000483998.6	-4519	ENSG00000146223	RPL7L1	ribosomal protein L7 like 1
chr1	231503053	231503470	418	*	Peak_1848	58	.	Distal Intergenic	1	231528653	231750619	221967	1	100303453	ENST00000647072.1	-25183	ENSG00000270106	TSNAX-DISC1	TSNAX-DISC1 readthrough (NMD candidate)
chr13	46898279	46898598	320	*	Peak_1849	58	.	Promoter (1-2kb)	13	46831555	46897076	65522	2	3356	ENST00000543956.4	-1203	ENSG00000102468	HTR2A	5-hydroxytryptamine receptor 2A
chr1	38988219	38988521	303	*	Peak_1866	58	.	Promoter (2-3kb)	1	38991223	39006059	14837	1	79647	ENST00000432648.7	-2702	ENSG00000174574	AKIRIN1	akirin 1
chr1	91804592	91804869	278	*	Peak_1872	58	.	Intron (ENST00000533089.5/7049, intron 1 of 19)	1	91727777	91766432	38656	2	7049	ENST00000468996.2	-38160	ENSG00000069702	TGFBR3	transforming growth factor beta receptor 3
chr11	82880061	82880635	575	*	Peak_1877	58	.	Intron (ENST00000313010.7/5547, intron 1 of 8)	11	82899975	82928889	28915	1	220042	ENST00000532277.5	-19340	ENSG00000165490	DDIAS	DNA damage induced apoptosis suppressor
chr18	21779403	21779674	272	*	Peak_1901	58	.	Exon (ENST00000578646.5/57534, exon 6 of 21)	18	21798084	21819558	21475	1	57534	ENST00000577749.5	-18410	ENSG00000101752	MIB1	mindbomb E3 ubiquitin protein ligase 1
chr5	23691025	23691289	265	*	Peak_1909	58	.	Distal Intergenic	5	23507615	23528597	20983	1	56979	ENST00000296682.3	183410	ENSG00000164256	PRDM9	PR/SET domain 9
chr8	84753457	84753711	255	*	Peak_1918	58	.	Intron (ENST00000522455.5/138046, intron 3 of 9)	8	84705936	84921844	215909	1	138046	ENST00000521376.1	47521	ENSG00000184672	RALYL	RALY RNA binding protein like
chr5	147288137	147288468	332	*	Peak_1908	58	.	Intron (ENST00000306304.10/202374, intron 4 of 10)	5	147235125	147384678	149554	1	202374	ENST00000398523.3	53012	ENSG00000169302	STK32A	serine/threonine kinase 32A
chr8	25667205	25667456	252	*	Peak_1956	57	.	Distal Intergenic	8	25479692	25507873	28182	1	157313	ENST00000521098.2	187513	ENSG00000184661	CDCA2	cell division cycle associated 2
chr5	57976896	57977138	243	*	Peak_1951	57	.	Distal Intergenic	5	57890327	57899162	8836	2	101928539	ENST00000510444.1	-77734	ENSG00000249584	LINC02225	long intergenic non-protein coding RNA 2225
chr6	29537873	29538327	455	*	Peak_1968	57	.	Exon (ENST00000457298.1/ENST00000457298.1, exon 1 of 1)	6	29529476	29532157	2682	1	100507362	ENST00000445296.1	8397	ENSG00000224582	LINC01015	long intergenic non-protein coding RNA 1015
chr16	3494305	3494540	236	*	Peak_1975	57	.	Promoter (<=1kb)	16	3493484	3495424	1941	2	646174	ENST00000437192.7	884	ENSG00000215131	C16orf90	chromosome 16 open reading frame 90
chr6	131688660	131689019	360	*	Peak_1999	57	.	Intron (ENST00000414305.5/5169, intron 15 of 25)	6	131699644	131701401	1758	2	79541	ENST00000315453.4	12382	ENSG00000180658	OR2A4	olfactory receptor family 2 subfamily A member 4
chr13	32129902	32130281	380	*	Peak_1986	57	.	Intron (ENST00000645780.1/10129, intron 8 of 61)	13	32060864	32117470	56607	1	10129	ENST00000436046.1	69038	ENSG00000073910	FRY	FRY microtubule binding protein
chr17	55961730	55962061	332	*	Peak_2014	57	.	Intron (ENST00000635860.1/162282, intron 2 of 12)	17	55882301	56449186	566886	1	162282	ENST00000635860.1	79429	ENSG00000153930	ANKFN1	ankyrin repeat and fibronectin type III domain containing 1
chr11	101466434	101466908	475	*	Peak_2036	57	.	Intron (ENST00000344327.7/7225, intron 10 of 12)	11	101453641	101455577	1937	2	7225	ENST00000532184.1	-10857	ENSG00000137672	TRPC6	transient receptor potential cation channel subfamily C member 6
chr1	86027729	86028057	329	*	Peak_2040	56	.	Intron (ENST00000370571.6/255631, intron 14 of 59)	1	85729233	86156763	427531	2	255631	ENST00000370571.6	128706	ENSG00000171502	COL24A1	collagen type XXIV alpha 1 chain
chr19	12602244	12602603	360	*	Peak_2044	56	.	Intron (ENST00000311437.10/57474, intron 2 of 4)	19	12581523	12597311	15789	2	57474	ENST00000440366.1	-4933	ENSG00000188033	ZNF490	zinc finger protein 490
chr10	46294269	46294546	278	*	Peak_2041	56	.	Promoter (1-2kb)	10	46292810	46294110	1301	1	195977	ENST00000610892.1	1459	ENSG00000274209	ANTXRL	ANTXR like
chr15	68673320	68673591	272	*	Peak_2052	56	.	Intron (ENST00000566799.5/10391, intron 2 of 11)	15	68631988	68727803	95816	1	10391	ENST00000543950.2	41332	ENSG00000103647	CORO2B	coronin 2B
chr11	83681278	83681525	248	*	Peak_2065	56	.	Promoter (<=1kb)	11	83472771	83682006	209236	2	1740	ENST00000524601.5	481	ENSG00000150672	DLG2	discs large MAGUK scaffold protein 2
chr10	100687061	100687517	457	*	Peak_2063	56	.	Distal Intergenic	10	100735603	100806599	70997	1	5076	ENST00000553492.5	-48086	ENSG00000075891	PAX2	paired box 2
chr17	45516050	45516293	244	*	Peak_2071	56	.	Promoter (<=1kb)	17	45506741	45515156	8416	2	55073	ENST00000579913.5	-894	NA	LRRC37A4P	leucine rich repeat containing 37 member A4, pseudogene
chr1	22914183	22914505	323	*	Peak_2074	56	.	3' UTR	1	22953049	22963178	10130	2	646262	ENST00000618559.1	48673	ENSG00000215906	LACTBL1	lactamase beta like 1
chr5	61884806	61885187	382	*	Peak_2079	56	.	Intron (ENST00000511474.1/ENST00000511474.1, intron 1 of 1)	5	61735138	61735669	532	2	100506526	ENST00000512882.2	-149137	NA	C5orf64-AS1	C5orf64 antisense RNA 1
chr2	19811050	19811306	257	*	Peak_2087	56	.	Distal Intergenic	2	19868860	19877393	8534	1	400946	ENST00000607100.5	-57554	ENSG00000228784	LINC00954	long intergenic non-protein coding RNA 954
chr3	7865702	7866093	392	*	Peak_2097	56	.	Distal Intergenic	3	7952805	8016307	63503	2	101927394	ENST00000441861.5	150214	ENSG00000227110	LOC101927394	uncharacterized LOC101927394
chr2	26466318	26466577	260	*	Peak_2111	55	.	Promoter (<=1kb)	2	26463506	26466325	2820	2	9381	ENST00000464574.1	0	ENSG00000115155	OTOF	otoferlin
chr8	143728576	143728855	280	*	Peak_2115	55	.	Exon (ENST00000388913.3/286077, exon 5 of 5)	8	143733083	143733153	71	2	100616318	ENST00000583819.1	4298	ENSG00000265660	MIR4664	microRNA 4664
chr17	55493402	55493671	270	*	Peak_2131	55	.	Intron (ENST00000636752.1/ENST00000636752.1, intron 1 of 4)	17	55392613	55421992	29380	2	23531	ENST00000262065.7	-71410	ENSG00000108960	MMD	monocyte to macrophage differentiation associated
chr4	1367500	1367882	383	*	Peak_2161	55	.	Promoter (1-2kb)	4	1366077	1386258	20182	1	57654	ENST00000511563.5	1423	ENSG00000163945	UVSSA	UV stimulated scaffold protein A
chr6	21490770	21491046	277	*	Peak_2221	54	.	Intron (ENST00000630914.1/100874531, intron 2 of 3)	6	21486061	21511895	25835	2	100874531	ENST00000630914.1	20849	ENSG00000280989	LINC00581	long intergenic non-protein coding RNA 581
chr2	28562093	28562364	272	*	Peak_2235	54	.	Intron (ENST00000327757.9/151056, intron 17 of 57)	2	28566443	28578147	11705	1	151056	ENST00000485642.1	-4079	ENSG00000163803	PLB1	phospholipase B1
chr16	84949669	84949972	304	*	Peak_2251	54	.	Distal Intergenic	16	84976104	84977281	1178	2	55625	ENST00000564526.1	27309	ENSG00000153786	ZDHHC7	zinc finger DHHC-type containing 7
chr5	178364326	178364616	291	*	Peak_2275	54	.	Intron (ENST00000390654.7/91522, intron 2 of 28)	5	178237620	178306934	69315	2	91522	ENST00000407622.2	-57392	ENSG00000050767	COL23A1	collagen type XXIII alpha 1 chain
chr10	75197767	75197997	231	*	Peak_2241	54	.	Distal Intergenic	10	75210154	75230951	20798	1	7417	ENST00000298468.9	-12157	ENSG00000165637	VDAC2	voltage dependent anion channel 2
chr1	197787994	197788523	530	*	Peak_2283	54	.	Distal Intergenic	1	197735658	197775696	40039	2	163486	ENST00000477581.1	-12298	ENSG00000213047	DENND1B	DENN domain containing 1B
chr14	105589038	105589311	274	*	Peak_2289	54	.	Distal Intergenic	14	105621116	105621180	65	1	102465871	ENST00000616769.1	-31805	ENSG00000274172	MIR8071-1	microRNA 8071-1
chr13	27969252	27969481	230	*	Peak_2309	54	.	Promoter (1-2kb)	13	27962137	27971139	9003	2	1045	ENST00000381020.7	1658	ENSG00000165556	CDX2	caudal type homeobox 2
chr11	105474822	105475161	340	*	Peak_2307	54	.	Intron (ENST00000649856.1/59082, intron 1 of 7)	11	105137721	105516002	378282	2	59082	ENST00000649856.1	40841	ENSG00000255501	CARD18	caspase recruitment domain family member 18
chr10	109261132	109261452	321	*	Peak_2306	54	.	Distal Intergenic	10	109868636	109871032	2397	2	7511	ENST00000494499.1	609580	ENSG00000108039	XPNPEP1	X-prolyl aminopeptidase 1
chr17	50832713	50833064	352	*	Peak_2321	54	.	Promoter (1-2kb)	17	50834650	50841308	6659	1	124857	ENST00000426127.1	-1586	ENSG00000173714	WFIKKN2	WAP, follistatin/kazal, immunoglobulin, kunitz and netrin domain containing 2
chr6	10552674	10552930	257	*	Peak_2345	54	.	Intron (ENST00000410107.5/2651, intron 3 of 4)	6	10556007	10629367	73361	1	2651	ENST00000316170.8	-3077	ENSG00000111846	GCNT2	glucosaminyl (N-acetyl) transferase 2 (I blood group)
chr3	9275929	9276371	443	*	Peak_2343	54	.	Intron (ENST00000490889.2/9901, intron 3 of 3)	3	9256759	9257507	749	1	101927440	ENST00000449023.1	19170	ENSG00000235830	SRGAP3-AS4	SRGAP3 antisense RNA 4
chr20	724805	725085	281	*	Peak_2335	54	.	Distal Intergenic	20	761024	765825	4802	2	113278	ENST00000473664.1	40740	ENSG00000101276	SLC52A3	solute carrier family 52 member 3
chr6	31289805	31290167	363	*	Peak_2346	54	.	Intron (ENST00000640615.1/3106, intron 2 of 2)	6	31293908	31301642	7735	2	105375015	ENST00000539514.1	11475	ENSG00000256166	LINC02571	long intergenic non-protein coding RNA 2571
chr3	29802669	29802991	323	*	Peak_2340	54	.	Intron (ENST00000636680.1/27303, intron 8 of 16)	3	29762923	29903238	140316	1	27303	ENST00000497319.1	39746	ENSG00000144642	RBMS3	RNA binding motif single stranded interacting protein 3
chr1	27173730	27174226	497	*	Peak_2350	54	.	Distal Intergenic	1	27114233	27166981	52749	2	6548	ENST00000374084.2	-6749	ENSG00000090020	SLC9A1	solute carrier family 9 member A1
chr22	38018798	38019085	288	*	Peak_2367	53	.	Intron (ENST00000407936.5/5435, intron 5 of 5)	22	37988794	37988853	60	1	100616146	ENST00000578108.1	30004	ENSG00000284266	MIR4534	microRNA 4534
chr12	110275566	110276130	565	*	Peak_2378	53	.	Distal Intergenic	12	110280756	110296712	15957	1	488	ENST00000552636.1	-4626	ENSG00000174437	ATP2A2	ATPase sarcoplasmic/endoplasmic reticulum Ca2+ transporting 2
chr1	204799344	204799613	270	*	Peak_2433	53	.	Distal Intergenic	1	204828651	205010924	182274	1	23114	ENST00000404977.6	-29038	ENSG00000163531	NFASC	neurofascin
chr1	211922590	211922886	297	*	Peak_2438	53	.	Distal Intergenic	1	211941723	211966467	24745	2	25896	ENST00000612340.1	43581	ENSG00000143493	INTS7	integrator complex subunit 7
chr20	22428923	22429202	280	*	Peak_2516	53	.	Intron (ENST00000634280.1/284788, intron 2 of 4)	20	22371216	22420647	49432	2	284788	ENST00000635130.1	-8276	ENSG00000204684	LOC284788	uncharacterized LOC284788
chr6	100136517	100136780	264	*	Peak_2597	53	.	Exon (ENST00000447134.1/ENST00000447134.1, exon 1 of 1)	6	100000940	100076406	75467	1	728012	ENST00000451220.2	135577	ENSG00000229315	MCHR2-AS1	MCHR2 antisense RNA 1
chr16	3492754	3493026	273	*	Peak_2476	53	.	Promoter (2-3kb)	16	3493484	3495424	1941	2	646174	ENST00000437192.7	2398	ENSG00000215131	C16orf90	chromosome 16 open reading frame 90
chr17	18572597	18572885	289	*	Peak_2483	53	.	Exon (ENST00000442562.1/ENST00000442562.1, exon 1 of 1)	17	18551028	18554265	3238	2	284047	ENST00000609959.1	-18332	ENSG00000154874	CCDC144B	coiled-coil domain containing 144B (pseudogene)
chr19	48040752	48041009	258	*	Peak_2512	53	.	Promoter (2-3kb)	19	48041329	48043881	2553	2	56344	ENST00000602032.1	2872	ENSG00000105507	CABP5	calcium binding protein 5
chr17	55992119	55992375	257	*	Peak_2490	53	.	Intron (ENST00000635860.1/162282, intron 3 of 12)	17	55882301	56449186	566886	1	162282	ENST00000635860.1	109818	ENSG00000153930	ANKFN1	ankyrin repeat and fibronectin type III domain containing 1
chr3	30214396	30214625	230	*	Peak_2558	53	.	Distal Intergenic	3	29988073	29991715	3643	1	27303	ENST00000497274.1	226323	ENSG00000144642	RBMS3	RNA binding motif single stranded interacting protein 3
chr19	13287374	13287619	246	*	Peak_2506	53	.	Promoter (<=1kb)	19	13273498	13286554	13057	2	773	ENST00000635786.1	-820	ENSG00000141837	CACNA1A	calcium voltage-gated channel subunit alpha1 A
chr6	28616299	28616606	308	*	Peak_2613	53	.	Promoter (<=1kb)	6	28576017	28616212	40196	2	114821	ENST00000530247.1	-87	ENSG00000232040	ZBED9	zinc finger BED-type containing 9
chr8	123949710	123949939	230	*	Peak_2714	53	.	Intron (ENST00000522917.5/654463, intron 1 of 40)	8	123984138	124040782	56645	2	439941	ENST00000518567.1	90843	ENSG00000181171	FER1L6-AS1	FER1L6 antisense RNA 1
chr2	86297334	86297569	236	*	Peak_2760	53	.	Intron (ENST00000165698.9/65055, intron 1 of 6)	2	86216517	86282232	65716	2	65055	ENST00000642243.1	-15102	ENSG00000068615	REEP1	receptor accessory protein 1
chr10	113408722	113409057	336	*	Peak_2726	53	.	Distal Intergenic	10	113550837	113589602	38766	1	3026	ENST00000542051.5	-141780	ENSG00000148702	HABP2	hyaluronan binding protein 2
chr6	81563765	81564045	281	*	Peak_2773	53	.	Intron (ENST00000412306.1/55603, intron 1 of 2)	6	81749870	81751753	1884	2	55603	ENST00000423467.1	187708	ENSG00000112773	TENT5A	terminal nucleotidyltransferase 5A
chr6	41344738	41345095	358	*	Peak_2772	53	.	Intron (ENST00000373083.8/9436, intron 5 of 5)	6	41335851	41350864	15014	1	9436	ENST00000373086.3	8887	ENSG00000096264	NCR2	natural cytotoxicity triggering receptor 2
chr8	97170065	97170428	364	*	Peak_2800	53	.	Distal Intergenic	8	97273474	97277964	4491	2	85453	ENST00000322128.4	107536	ENSG00000180543	TSPYL5	TSPY like 5
chr6	44701103	44701585	483	*	Peak_2799	53	.	Distal Intergenic	6	44829767	44955510	125744	2	8464	ENST00000371458.1	253925	ENSG00000196284	SUPT3H	SPT3 homolog, SAGA and STAGA complex component
chr21	33499961	33500339	379	*	Peak_2822	52	.	Distal Intergenic	21	33488190	33491720	3531	2	54943	ENST00000381947.3	-8241	ENSG00000177692	DNAJC28	DnaJ heat shock protein family (Hsp40) member C28
chr1	46812686	46813101	416	*	Peak_2832	52	.	Promoter (1-2kb)	1	46811103	46817181	6079	1	1580	ENST00000468637.3	1583	ENSG00000142973	CYP4B1	cytochrome P450 family 4 subfamily B member 1
chr6	29646293	29646665	373	*	Peak_2849	52	.	Distal Intergenic	6	29656981	29672372	15392	1	4340	ENST00000376917.7	-10316	ENSG00000204655	MOG	myelin oligodendrocyte glycoprotein
chr17	67759434	67759694	261	*	Peak_2870	52	.	Distal Intergenic	17	67743384	67744151	768	1	25926	ENST00000584032.1	16050	ENSG00000130935	NOL11	nucleolar protein 11
chr11	70743995	70744246	252	*	Peak_2881	52	.	Intron (ENST00000601538.5/22941, intron 13 of 24)	11	70492432	70698769	206338	2	22941	ENST00000426687.2	-45226	ENSG00000162105	SHANK2	SH3 and multiple ankyrin repeat domains 2
chr2	234001631	234001910	280	*	Peak_2910	52	.	Intron (ENST00000324695.8/79054, intron 22 of 25)	2	234013225	234014687	1463	1	79054	ENST00000466594.1	-11315	ENSG00000144481	TRPM8	transient receptor potential cation channel subfamily M member 8
chr5	120711787	120712036	250	*	Peak_2911	52	.	Distal Intergenic	5	120617137	120686925	69789	1	51334	ENST00000446965.2	94650	ENSG00000184838	PRR16	proline rich 16
chr17	43473581	43473856	276	*	Peak_2938	52	.	Exon (ENST00000516920.1/ENST00000516920.1, exon 1 of 1)	17	43483865	43492292	8428	1	1659	ENST00000592258.5	-10009	ENSG00000067596	DHX8	DEAH-box helicase 8
chr20	49302121	49302367	247	*	Peak_2939	52	.	Intron (ENST00000636838.1/ENST00000636838.1, intron 1 of 1)	20	49280683	49280772	90	1	692057	ENST00000391002.1	21438	ENSG00000212304	SNORD12	small nucleolar RNA, C/D box 12
chr5	171397527	171397789	263	*	Peak_2953	52	.	Promoter (2-3kb)	5	171400786	171405732	4947	1	4869	ENST00000519955.1	-2997	ENSG00000181163	NPM1	nucleophosmin 1
chr5	69279484	69279762	279	*	Peak_2958	52	.	Downstream (<1kb)	5	69313638	69320580	6943	2	202243	ENST00000513172.1	40818	ENSG00000183323	CCDC125	coiled-coil domain containing 125
chr3	190124155	190124391	237	*	Peak_2971	52	.	Promoter (1-2kb)	3	189956831	190122437	165607	2	55214	ENST00000427335.6	-1718	ENSG00000090530	P3H2	prolyl 3-hydroxylase 2
chr2	101621497	101621735	239	*	Peak_2970	52	.	Distal Intergenic	2	101696850	101824053	127204	1	9448	ENST00000427603.5	-75115	ENSG00000071054	MAP4K4	mitogen-activated protein kinase kinase kinase kinase 4
chr8	110882641	110882895	255	*	Peak_2983	51	.	Distal Intergenic	8	110982950	111027392	44443	2	101927459	ENST00000523557.1	144497	ENSG00000253877	LINC01608	long intergenic non-protein coding RNA 1608
chr1	7039029	7039299	271	*	Peak_3002	51	.	Intron (ENST00000303635.11/23261, intron 3 of 22)	1	6874056	6887842	13787	1	23261	ENST00000467267.1	164973	ENSG00000171735	CAMTA1	calmodulin binding transcription activator 1
chr1	6716319	6716548	230	*	Peak_3001	51	.	Distal Intergenic	1	6724637	6727408	2772	1	100505887	ENST00000432429.5	-8089	NA	LINC01672	long intergenic non-protein coding RNA 1672
chr1	46237541	46237950	410	*	Peak_2999	51	.	Distal Intergenic	1	46247688	46261358	13671	1	8438	ENST00000463715.5	-9738	ENSG00000085999	RAD54L	RAD54 like
chr5	134107738	134108111	374	*	Peak_3014	51	.	Distal Intergenic	5	134114711	134147997	33287	1	6932	ENST00000342854.9	-6600	ENSG00000081059	TCF7	transcription factor 7
chr20	21101918	21102170	253	*	Peak_3023	51	.	Promoter (<=1kb)	20	21092809	21101559	8751	2	105372556	ENST00000455890.2	-359	ENSG00000225127	LINC00237	long intergenic non-protein coding RNA 237
chr1	62280192	62280550	359	*	Peak_3034	51	.	Intron (ENST00000371153.8/163782, intron 2 of 9)	1	62237544	62272791	35248	2	163782	ENST00000371150.5	-7401	ENSG00000132854	KANK4	KN motif and ankyrin repeat domains 4
chr15	40446059	40446385	327	*	Peak_3032	51	.	Intron (ENST00000561234.5/22893, intron 1 of 6)	15	40441212	40468242	27031	1	22893	ENST00000416165.5	4847	ENSG00000140320	BAHD1	bromo adjacent homology domain containing 1
chr6	43140084	43140359	276	*	Peak_3046	51	.	Promoter (1-2kb)	6	43138553	43141948	3396	1	5754	ENST00000470471.1	1531	ENSG00000112655	PTK7	protein tyrosine kinase 7 (inactive)
chr10	120145833	120146144	312	*	Peak_3048	51	.	Distal Intergenic	10	119958513	119958592	80	1	100616322	ENST00000580643.1	187320	ENSG00000265370	MIR4682	microRNA 4682
chr22	29593564	29593793	230	*	Peak_3113	51	.	Distal Intergenic	22	29603556	29698594	95039	1	4771	ENST00000413209.6	-9763	ENSG00000186575	NF2	neurofibromin 2
chr8	133904563	133904875	313	*	Peak_3133	51	.	Distal Intergenic	8	133886496	133902407	15912	1	101927822	ENST00000520149.2	18067	ENSG00000253593	LOC101927822	uncharacterized LOC101927822
chr11	101705358	101705648	291	*	Peak_3096	51	.	Intron (ENST00000526713.1/7225, intron 1 of 1)	11	101451564	101583928	132365	2	7225	ENST00000344327.7	-121430	ENSG00000137672	TRPC6	transient receptor potential cation channel subfamily C member 6
chr7	276236	276502	267	*	Peak_3169	51	.	Distal Intergenic	7	256195	257453	1259	1	56975	ENST00000512382.1	20041	ENSG00000177706	FAM20C	FAM20C golgi associated secretory pathway kinase
chr12	8047981	8048230	250	*	Peak_3146	51	.	Promoter (1-2kb)	12	8049968	8053013	3046	1	55810	ENST00000539192.1	-1738	ENSG00000065970	FOXJ2	forkhead box J2
chr3	30739147	30739394	248	*	Peak_3160	51	.	Intron (ENST00000282538.9/339896, intron 14 of 14)	3	30728108	30779073	50966	2	339896	ENST00000498387.1	39679	ENSG00000144644	GADL1	glutamate decarboxylase like 1
chr2	4491410	4491652	243	*	Peak_3181	51	.	Distal Intergenic	2	4630200	4643355	13156	2	727982	ENST00000432314.5	151703	ENSG00000231532	LINC01249	long intergenic non-protein coding RNA 1249
chr21	33115646	33115882	237	*	Peak_3196	50	.	Intron (ENST00000421051.1/101928107, intron 1 of 2)	21	33111699	33123703	12005	2	101928107	ENST00000421051.1	7821	ENSG00000226527	LOC101928107	uncharacterized LOC101928107
chr10	47015854	47016135	282	*	Peak_3205	50	.	Distal Intergenic	10	46940582	47002488	61907	1	26095	ENST00000437863.2	75272	ENSG00000204179	PTPN20	protein tyrosine phosphatase non-receptor type 20
chr7	151590940	151591177	238	*	Peak_3230	50	.	Intron (ENST00000287878.8/51422, intron 6 of 15)	7	151564195	151574951	10757	2	51422	ENST00000478989.5	-15989	ENSG00000106617	PRKAG2	protein kinase AMP-activated non-catalytic subunit gamma 2
chr2	4695060	4695365	306	*	Peak_3231	50	.	Distal Intergenic	2	4628222	4656215	27994	2	727982	ENST00000412134.5	-38845	ENSG00000231532	LINC01249	long intergenic non-protein coding RNA 1249
chr17	43609161	43609400	240	*	Peak_3250	50	.	Intron (ENST00000588996.1/ENST00000588996.1, intron 2 of 2)	17	43544976	43579620	34645	2	2118	ENST00000586764.1	-29541	ENSG00000175832	ETV4	ETS variant 4
chr20	49329936	49330191	256	*	Peak_3267	50	.	Intron (ENST00000636663.1/ENST00000636663.1, intron 2 of 4)	20	49280683	49280772	90	1	692057	ENST00000391002.1	49253	ENSG00000212304	SNORD12	small nucleolar RNA, C/D box 12
chr19	42697673	42698240	568	*	Peak_3295	50	.	Distal Intergenic	19	42721638	42739372	17735	2	5671	ENST00000594378.1	41132	ENSG00000221826	PSG3	pregnancy specific beta-1-glycoprotein 3
chr11	31929898	31930320	423	*	Peak_3288	50	.	Intron (ENST00000530348.5/5954, intron 1 of 3)	11	31826347	31829311	2965	1	103157000	ENST00000630360.1	103551	ENSG00000281880	PAUPAR	PAX6 upstream antisense RNA
chr17	69440027	69440280	254	*	Peak_3294	50	.	Intron (ENST00000590474.6/5608, intron 1 of 11)	17	69414834	69542510	127677	1	5608	ENST00000359094.7	25193	ENSG00000108984	MAP2K6	mitogen-activated protein kinase kinase 6
chr1	3072652	3073040	389	*	Peak_3291	50	.	Intron (ENST00000511072.5/63976, intron 1 of 15)	1	3069211	3438621	369411	1	63976	ENST00000270722.9	3441	ENSG00000142611	PRDM16	PR/SET domain 16
chr6	135532272	135532517	246	*	Peak_3328	49	.	Intron (ENST00000421378.2/100131814, intron 1 of 3)	6	135497969	135642955	144987	1	100131814	ENST00000438618.2	34303	ENSG00000231028	LINC00271	long intergenic non-protein coding RNA 271
chr5	115987530	115987775	246	*	Peak_3339	49	.	Intron (ENST00000504467.5/206338, intron 3 of 19)	5	115995377	116026420	31044	1	206338	ENST00000514509.5	-7602	ENSG00000172901	LVRN	laeverin
chr17	77909991	77910431	441	*	Peak_3333	49	.	Distal Intergenic	17	77879027	77884087	5061	2	400624	ENST00000374983.3	-25904	ENSG00000204283	LINC01973	long intergenic non-protein coding RNA 1973
chr1	92449297	92449550	254	*	Peak_3363	49	.	Distal Intergenic	1	92474762	92483954	9193	2	2672	ENST00000370332.5	34404	ENSG00000162676	GFI1	growth factor independent 1 transcriptional repressor
chr8	141264556	141264918	363	*	Peak_3389	49	.	Intron (ENST00000520137.1/57210, intron 1 of 3)	8	141254565	141256817	2253	1	105375787	ENST00000518520.1	9991	ENSG00000254019	LOC105375787	uncharacterized LOC105375787
chr2	26493134	26493410	277	*	Peak_3383	49	.	Intron (ENST00000272371.6/9381, intron 9 of 46)	2	26457203	26478042	20840	2	9381	ENST00000402415.8	-15092	ENSG00000115155	OTOF	otoferlin
chr1	20890466	20890795	330	*	Peak_3394	49	.	Intron (ENST00000374935.7/8672, intron 14 of 32)	1	20825104	20847945	22842	2	8672	ENST00000435383.1	-42521	ENSG00000075151	EIF4G3	eukaryotic translation initiation factor 4 gamma 3
chr1	108572490	108572780	291	*	Peak_3392	49	.	Intron (ENST00000370035.7/284611, intron 1 of 10)	1	108560089	108644900	84812	1	284611	ENST00000405454.1	12401	ENSG00000162636	FAM102B	family with sequence similarity 102 member B
chr17	50305239	50305550	312	*	Peak_3400	49	.	Distal Intergenic	17	50281577	50287855	6279	2	103752589	ENST00000508851.1	-17384	ENSG00000251179	TMEM92-AS1	TMEM92 antisense RNA 1
chr15	20340366	20340598	233	*	Peak_3457	49	.	Distal Intergenic	15	20283496	20291558	8063	1	646096	ENST00000554701.2	56870	ENSG00000259156	CHEK2P2	checkpoint kinase 2 pseudogene 2
chr3	21286831	21287066	236	*	Peak_3464	48	.	Distal Intergenic	3	21405737	21406508	772	1	391518	ENST00000475503.1	-118671	NA	VENTXP7	VENT homeobox pseudogene 7
chr20	33156565	33156850	286	*	Peak_3473	48	.	Distal Intergenic	20	33161768	33181412	19645	1	140683	ENST00000253362.6	-4918	ENSG00000131050	BPIFA2	BPI fold containing family A member 2
chr8	140488770	140489007	238	*	Peak_3495	48	.	Distal Intergenic	8	140511298	140517137	5840	1	54108	ENST00000220913.9	-22291	ENSG00000104472	CHRAC1	chromatin accessibility complex subunit 1
chr3	49271864	49272249	386	*	Peak_3545	48	.	Promoter (1-2kb)	3	49274120	49274186	67	1	100422952	ENST00000582451.1	-1871	ENSG00000264633	MIR4271	microRNA 4271
chr22	19354406	19354811	406	*	Peak_3557	48	.	Intron (ENST00000340170.8/7290, intron 17 of 20)	22	19254034	19291716	37683	2	8218	ENST00000449918.1	-62690	ENSG00000070371	CLTCL1	clathrin heavy chain like 1
chr20	4198883	4199208	326	*	Peak_3578	48	.	Distal Intergenic	20	4193065	4195943	2879	1	728228	ENST00000419003.2	5818	ENSG00000230176	LINC01433	long intergenic non-protein coding RNA 1433
chr11	68416132	68416440	309	*	Peak_3583	48	.	3' UTR	11	68410029	68413195	3167	1	4041	ENST00000528714.1	6103	ENSG00000162337	LRP5	LDL receptor related protein 5
chr20	25026933	25027221	289	*	Peak_3614	48	.	Intron (ENST00000537502.5/84532, intron 2 of 12)	20	25006230	25032706	26477	2	84532	ENST00000537502.5	5485	ENSG00000154930	ACSS1	acyl-CoA synthetase short chain family member 1
chr4	823485	823749	265	*	Peak_3616	48	.	Promoter (2-3kb)	4	784958	826092	41135	2	10815	ENST00000505203.1	2343	ENSG00000168993	CPLX1	complexin 1
chrX	153963833	153964111	279	*	Peak_3632	48	.	Promoter (1-2kb)	23	153960009	153962267	2259	2	3054	ENST00000461098.1	-1566	ENSG00000172534	HCFC1	host cell factor C1
chr16	979796	980111	316	*	Peak_3636	48	.	Promoter (<=1kb)	16	975761	980913	5153	2	64788	ENST00000562570.1	802	ENSG00000103227	LMF1	lipase maturation factor 1
chr17	45796893	45797190	298	*	Peak_3647	48	.	Intron (ENST00000634540.1/104909134, intron 3 of 14)	17	45807074	45830125	23052	1	1394	ENST00000580955.5	-9884	ENSG00000120088	CRHR1	corticotropin releasing hormone receptor 1
chr9	132151829	132152067	239	*	Peak_3648	48	.	Distal Intergenic	9	132161676	132233890	72215	1	84628	ENST00000372179.7	-9609	ENSG00000196358	NTNG2	netrin G2
chr3	46030823	46031204	382	*	Peak_3681	47	.	Distal Intergenic	3	46017024	46027742	10719	2	2829	ENST00000309285.3	-3081	ENSG00000173578	XCR1	X-C motif chemokine receptor 1
chr9	129323848	129324200	353	*	Peak_3701	47	.	Promoter (2-3kb)	9	129321016	129324905	3890	1	414318	ENST00000316786.1	2832	NA	C9orf106	chromosome 9 open reading frame 106 (putative)
chr7	128854040	128854272	233	*	Peak_3758	47	.	Exon (ENST00000325888.12/2318, exon 40 of 48)	7	128850162	128862626	12465	2	110806300	ENST00000469965.1	8354	ENSG00000242902	FLNC-AS1	FLNC antisense RNA 1
chr20	46940964	46941295	332	*	Peak_3783	47	.	Intron (ENST00000327619.9/2139, intron 1 of 15)	20	46978235	46990070	11836	1	2139	ENST00000497428.1	-36940	ENSG00000064655	EYA2	EYA transcriptional coactivator and phosphatase 2
chr17	48361169	48361536	368	*	Peak_3775	47	.	Intron (ENST00000336915.10/8631, intron 3 of 12)	17	48137229	48346005	208777	2	8631	ENST00000581400.2	-15164	ENSG00000141293	SKAP1	src kinase associated phosphoprotein 1
chr17	16881307	16881792	486	*	Peak_3773	47	.	Distal Intergenic	17	16843865	16845881	2017	2	147228	ENST00000580363.1	-35426	NA	KRT17P1	keratin 17 pseudogene 1
chr13	45740484	45741044	561	*	Peak_3768	47	.	Distal Intergenic	13	45703128	45714559	11432	1	220082	ENST00000378966.3	37356	ENSG00000174015	SPERT	spermatid associated
chr17	80498825	80499130	306	*	Peak_3778	47	.	Distal Intergenic	17	80473414	80477843	4430	2	4884	ENST00000575212.1	-20982	ENSG00000171246	NPTX1	neuronal pentraxin 1
chr11	70405723	70406025	303	*	Peak_3763	47	.	Promoter (1-2kb)	11	70407353	70420253	12901	1	2017	ENST00000415461.2	-1328	ENSG00000085733	CTTN	cortactin
chr2	205599935	205600192	258	*	Peak_3815	47	.	Intron (ENST00000406610.6/117583, intron 22 of 22)	2	205681990	205701557	19568	1	8828	ENST00000464003.1	-81798	ENSG00000118257	NRP2	neuropilin 2
chr3	161436787	161437081	295	*	Peak_3826	47	.	Intron (ENST00000473595.1/101243545, intron 2 of 3)	3	161426427	161448242	21816	1	101243545	ENST00000473595.1	10360	ENSG00000240567	LINC02067	long intergenic non-protein coding RNA 2067
chr6	3370349	3370642	294	*	Peak_3838	47	.	Intron (ENST00000436008.6/63027, intron 3 of 10)	6	3289766	3377986	88221	2	63027	ENST00000496753.1	7344	ENSG00000137266	SLC22A23	solute carrier family 22 member 23
chr16	57770077	57770356	280	*	Peak_3839	47	.	Promoter (1-2kb)	16	57772289	57772352	64	2	102465463	ENST00000616699.1	1996	ENSG00000274816	MIR6772	microRNA 6772
chr11	68882161	68882390	230	*	Peak_3862	47	.	Distal Intergenic	11	68892492	68903778	11287	2	219927	ENST00000567045.5	21388	ENSG00000197345	MRPL21	mitochondrial ribosomal protein L21
chr1	222344297	222344790	494	*	Peak_3877	47	.	Intron (ENST00000416510.1/ENST00000416510.1, intron 2 of 3)	1	222522258	222525239	2982	2	79802	ENST00000473144.5	180449	ENSG00000143512	HHIPL2	HHIP like 2
chr1	230289890	230290203	314	*	Peak_3879	47	.	Distal Intergenic	1	230261951	230264972	3022	1	2590	ENST00000492568.1	27939	ENSG00000143641	GALNT2	polypeptide N-acetylgalactosaminyltransferase 2
chr21	36838938	36839270	333	*	Peak_3915	47	.	Intron (ENST00000612277.4/3141, intron 7 of 11)	21	36896570	36930417	33848	2	3141	ENST00000482273.1	91147	ENSG00000159267	HLCS	holocarboxylase synthetase
chr7	5395327	5395692	366	*	Peak_3952	47	.	Intron (ENST00000399537.8/84629, intron 2 of 29)	7	5376114	5388029	11916	2	84629	ENST00000413081.1	-7298	ENSG00000182095	TNRC18	trinucleotide repeat containing 18
chr8	142516834	142517103	270	*	Peak_3953	47	.	Intron (ENST00000517894.5/575, intron 18 of 30)	8	142543501	142544684	1184	1	575	ENST00000518812.1	-26398	ENSG00000181790	ADGRB1	adhesion G protein-coupled receptor B1
chr6	90222386	90222712	327	*	Peak_3947	47	.	Intron (ENST00000257749.8/60468, intron 3 of 8)	6	90089054	90218245	129192	2	60468	ENST00000493201.5	-4141	ENSG00000112182	BACH2	BTB domain and CNC homolog 2
chr11	17516416	17516743	328	*	Peak_3961	47	.	Promoter (<=1kb)	11	17493965	17516622	22658	2	10083	ENST00000529563.5	0	ENSG00000006611	USH1C	USH1 protein network component harmonin
chr3	167321014	167321443	430	*	Peak_4093	47	.	Intron (ENST00000392766.6/79740, intron 12 of 20)	3	167240638	167282572	41935	2	79740	ENST00000465071.1	-38442	ENSG00000169064	ZBBX	zinc finger B-box domain containing
chr12	67561479	67561763	285	*	Peak_4008	47	.	Intron (ENST00000650195.1/100507175, intron 4 of 4)	12	67520082	67567126	47045	1	100507175	ENST00000400306.2	41397	ENSG00000203585	LINC02408	long intergenic non-protein coding RNA 2408
chr2	165975811	165976040	230	*	Peak_4072	47	.	Intron (ENST00000595647.5/102724058, intron 1 of 6)	2	165957570	166171511	213942	1	101929680	ENST00000628933.2	18241	ENSG00000236107	SCN1A-AS1	SCN1A and SCN9A antisense RNA 1
chr2	174549058	174549345	288	*	Peak_4074	47	.	Intron (ENST00000442996.1/ENST00000442996.1, intron 2 of 3)	2	174557966	174558072	107	2	101954271	ENST00000384238.1	8727	ENSG00000207507	RNU6-9	RNA, U6 small nuclear 9
chr6	135229979	135230326	348	*	Peak_4133	47	.	Distal Intergenic	6	135239160	135239256	97	1	693126	ENST00000384956.1	-8834	ENSG00000207689	MIR548A2	microRNA 548a-2
chr3	148808982	148809270	289	*	Peak_4087	47	.	Promoter (1-2kb)	3	148810676	148840711	30036	1	1360	ENST00000462345.5	-1406	ENSG00000153002	CPB1	carboxypeptidase B1
chr8	143050839	143051269	431	*	Peak_4159	47	.	Intron (ENST00000517653.5/286122, intron 5 of 5)	8	143043208	143047984	4777	1	286122	ENST00000520786.3	7631	ENSG00000177335	C8orf31	chromosome 8 open reading frame 31
chr2	218315754	218316346	593	*	Peak_4079	47	.	Intron (ENST00000273077.8/25953, intron 2 of 9)	2	218323173	218346791	23619	1	25953	ENST00000258362.7	-6827	ENSG00000127838	PNKD	PNKD metallo-beta-lactamase domain containing
chr16	22607495	22607733	239	*	Peak_4032	47	.	Distal Intergenic	16	22546964	22576682	29719	1	653786	ENST00000548889.1	60531	ENSG00000257838	OTOAP1	OTOA pseudogene 1
chr10	103132124	103132400	277	*	Peak_3965	47	.	Intron (ENST00000404739.7/22978, intron 2 of 16)	10	103099926	103140192	40267	2	22978	ENST00000487810.5	7792	ENSG00000076685	NT5C2	5'-nucleotidase, cytosolic II
chr21	32350317	32350734	418	*	Peak_4067	47	.	Exon (ENST00000382751.3/9875, exon 20 of 39)	21	32334209	32335630	1422	2	9875	ENST00000492603.1	-14687	ENSG00000142207	URB1	URB1 ribosome biogenesis homolog
chr5	58766038	58766314	277	*	Peak_4124	47	.	Intron (ENST00000282878.5/115827, intron 3 of 4)	5	58788279	58851527	63249	1	115827	ENST00000381158.3	-21965	ENSG00000152932	RAB3C	RAB3C, member RAS oncogene family
chr1	228635448	228635678	231	*	Peak_4001	47	.	Distal Intergenic	1	228630390	228630508	119	2	100169768	ENST00000363040.1	-4940	ENSG00000200370	RNA5S17	RNA, 5S ribosomal 17
chr5	53729653	53729887	235	*	Peak_4122	47	.	Distal Intergenic	5	53646195	53658789	12595	1	4724	ENST00000509443.1	83458	ENSG00000164258	NDUFS4	NADH:ubiquinone oxidoreductase subunit S4
chr20	4385606	4385836	231	*	Peak_4064	47	.	Distal Intergenic	20	4220631	4249074	28444	2	146	ENST00000379453.5	-136532	ENSG00000171873	ADRA1D	adrenoceptor alpha 1D
chr6	50105446	50105717	272	*	Peak_4143	47	.	Intron (ENST00000637283.1/ENST00000637283.1, intron 3 of 6)	6	50043575	50048651	5077	2	245915	ENST00000322246.4	-56795	ENSG00000180872	DEFB112	defensin beta 112
chr1	221371859	221372091	233	*	Peak_3997	47	.	Distal Intergenic	1	221330080	221336296	6217	2	400804	ENST00000439004.1	-35563	ENSG00000234754	C1orf140	uncharacterized LOC400804
chr18	13487628	13487904	277	*	Peak_4046	47	.	Exon (ENST00000587344.1/ENST00000587344.1, exon 1 of 1)	18	13465015	13621270	156256	1	753	ENST00000593236.1	22613	ENSG00000168675	LDLRAD4	low density lipoprotein receptor class A domain containing 4
chr9	105751414	105751821	408	*	Peak_4169	47	.	Intron (ENST00000374692.7/55151, intron 5 of 5)	9	105721687	105749282	27596	1	55151	ENST00000451560.1	29727	ENSG00000095209	TMEM38B	transmembrane protein 38B
chr17	52930317	52930605	289	*	Peak_4042	47	.	Distal Intergenic	17	52985513	52987582	2070	1	100506650	ENST00000649605.1	-54908	ENSG00000227011	C17orf112	chromosome 17 open reading frame 112
chr1	171899059	171899291	233	*	Peak_3980	47	.	Intron (ENST00000367733.6/26052, intron 1 of 14)	1	171864187	171864687	501	1	100874284	ENST00000450800.1	34872	ENSG00000233540	DNM3-IT1	DNM3 intronic transcript 1
chr1	160609774	160610028	255	*	Peak_3978	47	.	3' UTR	1	160541095	160579516	38422	2	8832	ENST00000534968.5	-30258	ENSG00000066294	CD84	CD84 molecule
chr6	75405276	75405550	275	*	Peak_4189	46	.	Intron (ENST00000393004.6/27145, intron 2 of 6)	6	75428407	75428473	67	1	100616389	ENST00000580609.1	-22857	ENSG00000263533	MIR4463	microRNA 4463
chr9	109649858	109650181	324	*	Peak_4198	46	.	Intron (ENST00000374531.6/114299, intron 1 of 6)	9	109640788	109946703	305916	1	114299	ENST00000374531.6	9070	ENSG00000243444	PALM2	paralemmin 2
chr6	147713093	147713365	273	*	Peak_4966	46	.	Intron (ENST00000566741.1/389432, intron 1 of 1)	6	147509226	147737547	228322	1	389432	ENST00000566741.1	203867	ENSG00000203727	SAMD5	sterile alpha motif domain containing 5
chr15	50496803	50497050	248	*	Peak_4468	46	.	Promoter (1-2kb)	15	50498497	50499407	911	1	9101	ENST00000560379.1	-1447	ENSG00000138592	USP8	ubiquitin specific peptidase 8
chr11	30017304	30017643	340	*	Peak_4266	46	.	Promoter (<=1kb)	11	30009741	30017023	7283	2	3739	ENST00000328224.6	-281	ENSG00000182255	KCNA4	potassium voltage-gated channel subfamily A member 4
chr6	84347902	84348218	317	*	Peak_4998	46	.	Distal Intergenic	6	84124242	84227635	103394	2	22832	ENST00000617909.1	-120267	ENSG00000135315	CEP162	centrosomal protein 162
chr13	99287085	99287363	279	*	Peak_4427	46	.	Intron (ENST00000355700.9/337867, intron 2 of 4)	13	99294530	99307405	12876	2	1880	ENST00000376414.4	20042	ENSG00000169508	GPR183	G protein-coupled receptor 183
chr6	105520102	105520415	314	*	Peak_4933	46	.	Distal Intergenic	6	105277565	105403084	125520	2	5550	ENST00000369110.7	-117018	ENSG00000085377	PREP	prolyl endopeptidase
chr14	60550692	60550922	231	*	Peak_4444	46	.	Intron (ENST00000557618.1/ENST00000557618.1, intron 1 of 1)	14	60478357	60515543	37187	2	317761	ENST00000556799.1	-35149	ENSG00000179008	C14orf39	chromosome 14 open reading frame 39
chr14	20723234	20723491	258	*	Peak_4430	46	.	Distal Intergenic	14	20745892	20748380	2489	1	10876	ENST00000326842.2	-22401	ENSG00000181562	EDDM3A	epididymal protein 3A
chr20	58967978	58968259	282	*	Peak_4640	46	.	Intron (ENST00000644133.1/ENST00000644133.1, intron 1 of 4)	20	58981208	58995133	13926	1	51497	ENST00000602795.5	-12949	ENSG00000101158	NELFCD	negative elongation factor complex member C/D
chr18	44265057	44265286	230	*	Peak_4570	46	.	Intron (ENST00000649259.1/ENST00000649259.1, intron 1 of 3)	18	44326446	44531655	205210	2	101927921	ENST00000591487.1	266369	ENSG00000267337	LINC01478	long intergenic non-protein coding RNA 1478
chr6	147454987	147455245	259	*	Peak_4965	46	.	Distal Intergenic	6	147508927	147570021	61095	1	389432	ENST00000367474.1	-53682	ENSG00000203727	SAMD5	sterile alpha motif domain containing 5
chr7	46350581	46350810	230	*	Peak_5042	46	.	Distal Intergenic	7	46687879	46697122	9244	2	730338	ENST00000451905.4	346312	ENSG00000233539	LOC730338	uncharacterized LOC730338
chr1	38606977	38607224	248	*	Peak_4425	46	.	Distal Intergenic	1	38475196	38476484	1289	1	105378656	ENST00000452971.1	131781	ENSG00000238063	LINC01685	long intergenic non-protein coding RNA 1685
chr8	103939713	103939946	234	*	Peak_5056	46	.	Intron (ENST00000504942.6/9699, intron 13 of 23)	8	103915513	103922008	6496	1	9699	ENST00000511046.1	24200	ENSG00000176406	RIMS2	regulating synaptic membrane exocytosis 2
chr6	146037759	146037990	232	*	Peak_4964	46	.	Intron (ENST00000507005.1/2911, intron 2 of 2)	6	146029486	146434885	405400	1	2911	ENST00000507907.1	8273	ENSG00000152822	GRM1	glutamate metabotropic receptor 1
chr8	109379314	109379549	236	*	Peak_5060	46	.	Intron (ENST00000378402.9/93035, intron 2 of 77)	8	109362477	109530330	167854	1	93035	ENST00000378402.9	16837	ENSG00000205038	PKHD1L1	PKHD1 like 1
chr19	46500041	46500510	470	*	Peak_4608	46	.	Intron (ENST00000602017.5/100506012, intron 3 of 3)	19	46491191	46496498	5308	2	57469	ENST00000599531.1	-3543	ENSG00000204851	PNMA8B	PNMA family member 8B
chr6	133070073	133070305	233	*	Peak_4955	46	.	Distal Intergenic	6	133088080	133106578	18499	1	285735	ENST00000457339.5	-17775	NA	LINC00326	long intergenic non-protein coding RNA 326
chr8	112853228	112853495	268	*	Peak_5064	46	.	Intron (ENST00000343508.7/114788, intron 12 of 71)	8	112222932	112690042	467111	2	114788	ENST00000339701.7	-163186	ENSG00000164796	CSMD3	CUB and Sushi multiple domains 3
chr3	145933934	145934193	260	*	Peak_4764	46	.	Distal Intergenic	3	146066344	146069185	2842	2	109729161	ENST00000490375.1	134992	ENSG00000240032	LNCSRLR	lncRNA sorafenib resistance in renal cell carcinoma associated
chr3	132980688	132980934	247	*	Peak_4761	46	.	Distal Intergenic	3	133038391	133119384	80994	1	66000	ENST00000514529.5	-57457	ENSG00000144868	TMEM108	transmembrane protein 108
chr12	107304079	107304312	234	*	Peak_4323	46	.	Distal Intergenic	12	107318413	107659642	341230	1	121551	ENST00000280758.9	-14101	ENSG00000151136	BTBD11	BTB domain containing 11
chr8	120373929	120374158	230	*	Peak_5068	46	.	Distal Intergenic	8	120345446	120371081	25636	1	7373	ENST00000440844.5	28483	ENSG00000187955	COL14A1	collagen type XIV alpha 1 chain
chr3	72140613	72140876	264	*	Peak_4807	46	.	Intron (ENST00000469218.5/285286, intron 1 of 2)	3	72151257	72174332	23076	1	201617	ENST00000473713.5	-10381	ENSG00000243083	LINC00870	long intergenic non-protein coding RNA 870
chr11	84256160	84256392	233	*	Peak_4304	46	.	Intron (ENST00000280241.12/1740, intron 1 of 21)	11	83459422	84273188	813767	2	1740	ENST00000330014.11	16796	ENSG00000150672	DLG2	discs large MAGUK scaffold protein 2
chr3	70658964	70659216	253	*	Peak_4806	46	.	Distal Intergenic	3	70959191	70966352	7162	2	27086	ENST00000460805.5	307136	ENSG00000114861	FOXP1	forkhead box P1
chr3	57378412	57378704	293	*	Peak_4798	46	.	Intron (ENST00000351747.6/201625, intron 44 of 58)	3	57293749	57357185	63437	2	201625	ENST00000466540.2	-21227	ENSG00000174844	DNAH12	dynein axonemal heavy chain 12
chr12	68891903	68892363	461	*	Peak_4380	46	.	Intron (ENST00000551568.5/1368, intron 2 of 8)	12	68866825	68870382	3558	2	1368	ENST00000546912.1	-21521	ENSG00000135678	CPM	carboxypeptidase M
chr1	63161141	63161376	236	*	Peak_4500	46	.	Promoter (<=1kb)	1	63159087	63160410	1324	2	199899	ENST00000432537.2	-731	ENSG00000224209	LINC00466	long intergenic non-protein coding RNA 466
chr8	10706014	10706243	230	*	Peak_5057	46	.	Intron (ENST00000329335.3/94137, intron 1 of 2)	8	10621096	10712187	91092	2	94137	ENST00000329335.3	5944	ENSG00000183638	RP1L1	RP1 like 1
chr12	30870820	30871132	313	*	Peak_4360	46	.	Intron (ENST00000648700.1/100287314, intron 2 of 2)	12	30926428	30955260	28833	1	441631	ENST00000545802.1	-55296	ENSG00000110900	TSPAN11	tetraspanin 11
chr17	7109031	7109265	235	*	Peak_4546	46	.	Intron (ENST00000355035.9/433, intron 2 of 8)	17	7101575	7114240	12666	2	433	ENST00000446679.6	4975	ENSG00000161944	ASGR2	asialoglycoprotein receptor 2
chr5	159678717	159679038	322	*	Peak_4879	46	.	Intron (ENST00000636819.1/ENST00000636819.1, intron 4 of 6)	5	159776772	159871384	94613	2	101927766	ENST00000522627.1	192346	ENSG00000253311	LINC01847	long intergenic non-protein coding RNA 1847
chr2	227604519	227604748	230	*	Peak_4719	46	.	Distal Intergenic	2	227616998	227617790	793	2	729968	ENST00000413096.1	13042	NA	LOC729968	spore coat protein SP96
chr6	94511777	94512023	247	*	Peak_5004	46	.	Distal Intergenic	6	95575183	95577450	2268	2	101927288	ENST00000564541.1	1065427	ENSG00000261366	MANEA-DT	MANEA divergent transcript
chr17	14783567	14783796	230	*	Peak_4522	46	.	Distal Intergenic	17	15014805	15052276	37472	1	101928475	ENST00000446671.1	-231009	ENSG00000232058	LOC101928475	uncharacterized LOC101928475
chr1	82096695	82096946	252	*	Peak_4562	46	.	Distal Intergenic	1	81988392	81990709	2318	1	23266	ENST00000464551.1	108303	ENSG00000117114	ADGRL2	adhesion G protein-coupled receptor L2
chr16	51526455	51526684	230	*	Peak_4505	46	.	Distal Intergenic	16	51762519	51772646	10128	1	101927364	ENST00000569993.5	-235835	ENSG00000260057	LINC01571	long intergenic non-protein coding RNA 1571
chr16	49524515	49524744	230	*	Peak_4504	46	.	Intron (ENST00000561648.5/23090, intron 7 of 8)	16	49517762	49518601	840	2	1596	ENST00000569937.2	-5914	ENSG00000260089	ADAM3B	ADAM metallopeptidase domain 3B (pseudogene)
chr2	204295450	204295685	236	*	Peak_4701	46	.	Distal Intergenic	2	204545793	205048595	502803	1	117583	ENST00000415947.1	-250108	ENSG00000116117	PARD3B	par-3 family cell polarity regulator beta
chr20	22878557	22878806	250	*	Peak_4627	46	.	Distal Intergenic	20	23035386	23036812	1427	1	6754	ENST00000255008.4	-156580	ENSG00000132671	SSTR4	somatostatin receptor 4
chr5	106187281	106187512	232	*	Peak_4841	46	.	Distal Intergenic	5	106815205	106980869	165665	2	102467213	ENST00000505997.1	793357	ENSG00000251027	LINC01950	long intergenic non-protein coding RNA 1950
chr5	93712235	93712533	299	*	Peak_4927	46	.	Intron (ENST00000395965.7/83989, intron 10 of 10)	5	93733220	93741637	8418	2	134187	ENST00000606183.3	29104	ENSG00000248483	POU5F2	POU domain class 5, transcription factor 2
chr5	84849253	84849499	247	*	Peak_4919	46	.	Distal Intergenic	5	83940554	84384793	444240	2	10085	ENST00000296591.9	-464460	ENSG00000164176	EDIL3	EGF like repeats and discoidin domains 3
chr5	175037276	175037513	238	*	Peak_4883	46	.	Distal Intergenic	5	174919082	174995513	76432	2	441116	ENST00000377300.3	-41763	ENSG00000204754	LINC01951	long intergenic non-protein coding RNA 1951
chr10	66466660	66466958	299	*	Peak_4224	46	.	Intron (ENST00000433211.6/29119, intron 11 of 17)	10	65920111	66079103	158993	2	29119	ENST00000373735.1	-387557	ENSG00000183230	CTNNA3	catenin alpha 3
chr1	184344179	184344408	230	*	Peak_4306	46	.	Distal Intergenic	1	184387058	184629020	241963	1	81563	ENST00000235307.6	-42650	ENSG00000116667	C1orf21	chromosome 1 open reading frame 21
chr8	87054901	87055305	405	*	Peak_5125	46	.	Intron (ENST00000518476.5/168975, intron 4 of 10)	8	87044492	87284722	240231	1	168975	ENST00000522427.1	10409	ENSG00000176571	CNBD1	cyclic nucleotide binding domain containing 1
chr2	174716862	174717100	239	*	Peak_4684	46	.	Promoter (2-3kb)	2	174719908	174720318	411	1	440926	ENST00000369387.4	-2808	NA	H3F3AP4	H3 histone, family 3A, pseudogene 4
chr5	66379985	66380257	273	*	Peak_4909	46	.	Distal Intergenic	5	66507544	66511604	4061	2	101928769	ENST00000508486.2	131347	ENSG00000250313	LINC02229	long intergenic non-protein coding RNA 2229
chr5	64237290	64237527	238	*	Peak_4907	46	.	Intron (ENST00000389100.8/285671, intron 5 of 7)	5	64166162	64213647	47486	1	285671	ENST00000504296.1	71128	ENSG00000164197	RNF180	ring finger protein 180
chr2	167856631	167856869	239	*	Peak_4677	46	.	Intron (ENST00000430546.1/105616981, intron 1 of 1)	2	167814774	167869914	55141	2	105616981	ENST00000430546.1	13045	NA	LOC105616981	uncharacterized LOC105616981
chr7	30675559	30675824	266	*	Peak_5035	46	.	Intron (ENST00000506074.6/1395, intron 2 of 12)	7	30651943	30682525	30583	2	1395	ENST00000506074.6	6701	ENSG00000106113	CRHR2	corticotropin releasing hormone receptor 2
chr2	217198187	217198512	326	*	Peak_4714	46	.	Distal Intergenic	2	217282739	217336120	53382	1	105373877	ENST00000452813.1	-84227	NA	DIRC3-AS1	DIRC3 antisense RNA 1
chr18	59239646	59239881	236	*	Peak_5204	46	.	Distal Intergenic	18	59225667	59230766	5100	1	2922	ENST00000530323.1	13979	ENSG00000134443	GRP	gastrin releasing peptide
chr1	167571229	167571592	364	*	Peak_5258	46	.	Distal Intergenic	1	167529117	167553805	24689	2	8804	ENST00000466652.2	-17424	ENSG00000143162	CREG1	cellular repressor of E1A stimulated genes 1
chr19	10799109	10799338	230	*	Peak_5278	46	.	Promoter (<=1kb)	19	10798387	10802599	4213	1	1785	ENST00000587329.1	722	ENSG00000079805	DNM2	dynamin 2
chr8	47181261	47181518	258	*	Peak_5288	46	.	Intron (ENST00000509729.3/ENST00000509729.3, intron 1 of 9)	8	47189305	47189560	256	1	100287846	ENST00000521874.1	-7787	NA	LOC100287846	uncharacterized LOC100287846
chr15	64798174	64798411	238	*	Peak_5272	46	.	Distal Intergenic	15	64818010	64818824	815	2	80119	ENST00000559522.1	20413	ENSG00000140451	PIF1	PIF1 5'-to-3' DNA helicase
chr6	24534275	24534542	268	*	Peak_5362	46	.	Promoter (2-3kb)	6	24532010	24533808	1799	1	7915	ENST00000492697.1	2265	ENSG00000112294	ALDH5A1	aldehyde dehydrogenase 5 family member A1
chr17	79888920	79889149	230	*	Peak_5390	46	.	Distal Intergenic	17	79919357	79924010	4654	1	101928738	ENST00000574526.1	-30208	ENSG00000262188	LINC01978	long intergenic non-protein coding RNA 1978
chr11	59325482	59325792	311	*	Peak_5380	46	.	Distal Intergenic	11	59364412	59365448	1037	1	390195	ENST00000313940.2	-38620	ENSG00000176495	OR5AN1	olfactory receptor family 5 subfamily AN member 1
chr1	203743816	203744178	363	*	Peak_5418	45	.	3' UTR	1	203729581	203729705	125	1	677843	ENST00000408716.1	14235	ENSG00000221643	SNORA77	small nucleolar RNA, H/ACA box 77
chr1	7113133	7113363	231	*	Peak_5439	45	.	Intron (ENST00000303635.11/23261, intron 4 of 22)	1	6874056	6887842	13787	1	23261	ENST00000467267.1	239077	ENSG00000171735	CAMTA1	calmodulin binding transcription activator 1
chr12	122513696	122514113	418	*	Peak_5488	45	.	Promoter (<=1kb)	12	122505330	122513917	8588	2	65117	ENST00000392442.6	0	ENSG00000111011	RSRC2	arginine and serine rich coiled-coil 2
chr20	3690043	3690272	230	*	Peak_5503	45	.	Promoter (2-3kb)	20	3686970	3693079	6110	2	6614	ENST00000419548.4	2807	ENSG00000088827	SIGLEC1	sialic acid binding Ig like lectin 1
chr12	51034141	51034439	299	*	Peak_5501	45	.	Distal Intergenic	12	50985992	51028566	42575	2	4891	ENST00000394904.8	-5575	ENSG00000110911	SLC11A2	solute carrier family 11 member 2
chr16	406287	406539	253	*	Peak_5521	45	.	Promoter (<=1kb)	16	406895	412487	5593	1	26063	ENST00000461947.5	-356	ENSG00000242612	DECR2	2,4-dienoyl-CoA reductase 2
chr6	23861729	23862025	297	*	Peak_5550	45	.	Distal Intergenic	6	24126122	24147411	21290	1	140767	ENST00000378491.8	-264097	ENSG00000152954	NRSN1	neurensin 1
chr6	87335128	87335380	253	*	Peak_5552	45	.	Intron (ENST00000608353.5/57150, intron 2 of 3)	6	87282978	87329278	46301	2	375519	ENST00000525899.5	-5850	ENSG00000164411	GJB7	gap junction protein beta 7
chr19	12167145	12167393	249	*	Peak_5577	45	.	Intron (ENST00000425827.5/7695, intron 1 of 4)	19	12163116	12186157	23042	1	7695	ENST00000418338.1	4029	ENSG00000196646	ZNF136	zinc finger protein 136
chr2	84554593	84554850	258	*	Peak_5647	45	.	Intron (ENST00000476689.5/1768, intron 6 of 10)	2	84517823	84584791	66969	1	1768	ENST00000494025.1	36770	ENSG00000115423	DNAH6	dynein axonemal heavy chain 6
chr17	53278833	53279077	245	*	Peak_5676	45	.	Intron (ENST00000650577.1/ENST00000650577.1, intron 6 of 6)	17	52985520	52987652	2133	1	100506650	ENST00000623702.1	293313	ENSG00000227011	C17orf112	chromosome 17 open reading frame 112
chr5	176817199	176817563	365	*	Peak_5679	45	.	Intron (ENST00000329542.8/90249, intron 1 of 14)	5	176810519	176880898	70380	1	90249	ENST00000509580.2	6680	ENSG00000113763	UNC5A	unc-5 netrin receptor A
chr15	32110129	32110358	230	*	Peak_5754	44	.	Promoter (<=1kb)	15	32111180	32171422	60243	1	1139	ENST00000636292.1	-822	ENSG00000175344	CHRNA7	cholinergic receptor nicotinic alpha 7 subunit
chr3	32843464	32843801	338	*	Peak_5798	44	.	Intron (ENST00000383763.5/131405, intron 1 of 3)	3	32818018	32897826	79809	1	131405	ENST00000383763.5	25446	ENSG00000206557	TRIM71	tripartite motif containing 71
chr1	208259206	208259590	385	*	Peak_5743	44	.	Distal Intergenic	1	208022242	208244320	222079	2	5362	ENST00000367033.3	-14886	ENSG00000076356	PLXNA2	plexin A2
chr2	43841447	43841678	232	*	Peak_5792	44	.	Promoter (2-3kb)	2	43838975	43878466	39492	1	64241	ENST00000272286.3	2472	ENSG00000143921	ABCG8	ATP binding cassette subfamily G member 8
chr3	169696892	169697174	283	*	Peak_5793	44	.	Distal Intergenic	3	169149482	169663618	514137	2	2122	ENST00000485957.1	-33274	ENSG00000085276	MECOM	MDS1 and EVI1 complex locus
chr5	147204922	147205153	232	*	Peak_5807	44	.	Intron (ENST00000504297.1/105378217, intron 1 of 2)	5	147180204	147234859	54656	2	105378217	ENST00000504297.1	29706	NA	STK32A-AS1	STK32A antisense RNA 1
chr10	47300966	47301382	417	*	Peak_5730	44	.	Promoter (<=1kb)	10	47300386	47313547	13162	1	2662	ENST00000580279.1	580	ENSG00000266524	GDF10	growth differentiation factor 10
chr5	39593436	39593720	285	*	Peak_5839	44	.	Distal Intergenic	5	39521519	39524703	3185	1	101926940	ENST00000603514.1	71917	ENSG00000271334	LINC02104	long intergenic non-protein coding RNA 2104
chr2	3718934	3719450	517	*	Peak_5838	44	.	Intron (ENST00000399143.8/728597, intron 2 of 10)	2	3725946	3788532	62587	1	728597	ENST00000537457.1	-6496	ENSG00000214866	DCDC2C	doublecortin domain containing 2C
chr11	64721146	64721530	385	*	Peak_5856	44	.	Promoter (1-2kb)	11	64606174	64723188	117015	2	9379	ENST00000377559.7	1658	ENSG00000110076	NRXN2	neurexin 2
chr1	39376646	39377079	434	*	Peak_5859	44	.	Intron (ENST00000567887.5/23499, intron 52 of 100)	1	39409503	39428092	18590	1	23499	ENST00000530275.3	-32424	ENSG00000127603	MACF1	microtubule actin crosslinking factor 1
chr6	52246397	52246769	373	*	Peak_5872	44	.	Promoter (1-2kb)	6	52236681	52244537	7857	2	112744	ENST00000336123.4	-1860	ENSG00000112116	IL17F	interleukin 17F
chr8	80688692	80688934	243	*	Peak_5939	44	.	Intron (ENST00000327835.7/619279, intron 3 of 8)	8	80664842	80673339	8498	2	619279	ENST00000522040.5	-15353	ENSG00000164684	ZNF704	zinc finger protein 704
chr6	20454635	20454921	287	*	Peak_5938	44	.	Intron (ENST00000613242.4/1871, intron 2 of 4)	6	20403679	20493714	90036	1	1871	ENST00000535432.2	50956	ENSG00000112242	E2F3	E2F transcription factor 3
chr17	31891803	31892051	249	*	Peak_5982	44	.	Intron (ENST00000261708.8/55813, intron 6 of 18)	17	31863174	31888221	25048	2	55813	ENST00000477128.5	-3582	ENSG00000108651	UTP6	UTP6 small subunit processome component
chr7	5333916	5334145	230	*	Peak_5996	44	.	Promoter (1-2kb)	7	5324222	5332878	8657	2	84629	ENST00000455076.1	-1038	ENSG00000182095	TNRC18	trinucleotide repeat containing 18
chr9	133996667	133997123	457	*	Peak_6002	44	.	Distal Intergenic	9	133761894	133992604	230711	2	7410	ENST00000371851.1	-4063	ENSG00000160293	VAV2	vav guanine nucleotide exchange factor 2
chr5	168601536	168601894	359	*	Peak_6008	44	.	Distal Intergenic	5	168548495	168579600	31106	2	79646	ENST00000239231.6	-21936	ENSG00000120137	PANK3	pantothenate kinase 3
chr18	44732157	44732494	338	*	Peak_6019	44	.	Intron (ENST00000426838.8/26040, intron 2 of 3)	18	44701338	44872146	170809	1	26040	ENST00000645568.1	30819	ENSG00000152217	SETBP1	SET binding protein 1
chr8	61454107	61454373	267	*	Peak_6082	43	.	Promoter (<=1kb)	8	61454142	61458660	4519	1	157807	ENST00000522928.1	0	ENSG00000177182	CLVS1	clavesin 1
chr3	32894913	32895221	309	*	Peak_6089	43	.	3' UTR	3	32951574	32956349	4776	1	1233	ENST00000330953.5	-56353	ENSG00000183813	CCR4	C-C motif chemokine receptor 4
chr1	91806744	91807029	286	*	Peak_6094	43	.	Intron (ENST00000533089.5/7049, intron 1 of 19)	1	91727777	91766432	38656	2	7049	ENST00000468996.2	-40312	ENSG00000069702	TGFBR3	transforming growth factor beta receptor 3
chr1	43544262	43544496	235	*	Peak_6098	43	.	Promoter (<=1kb)	1	43545076	43579284	34209	1	5792	ENST00000437607.1	-580	ENSG00000142949	PTPRF	protein tyrosine phosphatase receptor type F
chr3	147099450	147099807	358	*	Peak_6138	43	.	Intron (ENST00000473299.1/ENST00000473299.1, intron 3 of 5)	3	146921963	146925218	3256	1	101927866	ENST00000471638.1	177487	ENSG00000242671	LINC02010	long intergenic non-protein coding RNA 2010
chr8	102989199	102989611	413	*	Peak_6178	43	.	Intron (ENST00000520750.6/100506753, intron 5 of 6)	8	103021063	103069179	48117	1	528	ENST00000518857.5	-31452	ENSG00000155097	ATP6V1C1	ATPase H+ transporting V1 subunit C1
chr3	49655362	49655616	255	*	Peak_6189	43	.	Exon (ENST00000296452.4/8927, exon 5 of 12)	3	49643029	49651349	8321	1	8927	ENST00000467456.1	12333	ENSG00000164061	BSN	bassoon presynaptic cytomatrix protein
chr9	110765468	110765709	242	*	Peak_6205	43	.	Intron (ENST00000374448.8/4593, intron 8 of 14)	9	110775347	110788101	12755	1	4593	ENST00000374438.1	-9638	ENSG00000030304	MUSK	muscle associated receptor tyrosine kinase
chr10	47456269	47456498	230	*	Peak_6193	43	.	Distal Intergenic	10	47468541	47484016	15476	2	653145	ENST00000577813.1	27518	ENSG00000265190	ANXA8	annexin A8
chr5	150982909	150983163	255	*	Peak_6230	43	.	Distal Intergenic	5	150930763	150946289	15527	2	134466	ENST00000356555.6	-36620	NA	ZNF300P1	zinc finger protein 300 pseudogene 1
chr9	121810049	121810284	236	*	Peak_6286	43	.	Distal Intergenic	9	121760340	121768526	8187	1	153090	ENST00000459906.1	49709	ENSG00000136848	DAB2IP	DAB2 interacting protein
chr9	109633824	109634067	244	*	Peak_6294	43	.	Distal Intergenic	9	109640788	109946703	305916	1	114299	ENST00000374531.6	-6721	ENSG00000243444	PALM2	paralemmin 2
chr20	31998262	31998506	245	*	Peak_6300	43	.	3' UTR	20	32010450	32032180	21731	1	140706	ENST00000262659.12	-11944	ENSG00000101331	CCM2L	CCM2 like scaffold protein
chr7	149265737	149266491	755	*	Peak_6348	42	.	Exon (ENST00000434415.5/100289678, exon 2 of 6)	7	149262215	149295185	32971	1	155060	ENST00000476295.5	3522	ENSG00000244560	LOC155060	AI894139 pseudogene
chr20	37559364	37559596	233	*	Peak_6362	42	.	Distal Intergenic	20	37517418	37527931	10514	2	10904	ENST00000414542.6	-31433	ENSG00000166619	BLCAP	BLCAP apoptosis inducing factor
chr5	151324840	151325237	398	*	Peak_6424	42	.	3' UTR	5	151325151	151333324	8174	2	153201	ENST00000523044.1	8087	ENSG00000186335	SLC36A2	solute carrier family 36 member 2
chr6	142115215	142115667	453	*	Peak_6461	42	.	Distal Intergenic	6	142133090	142135151	2062	1	100126572	ENST00000450456.2	-17423	ENSG00000203733	GJE1	gap junction protein epsilon 1
chr19	6772897	6773173	277	*	Peak_6508	42	.	Promoter (<=1kb)	19	6772728	6857360	84633	1	7409	ENST00000596764.5	169	ENSG00000141968	VAV1	vav guanine nucleotide exchange factor 1
chr11	74305952	74306269	318	*	Peak_6517	42	.	Intron (ENST00000524388.5/283208, intron 1 of 15)	11	74311362	74324705	13344	1	101928580	ENST00000502071.2	-5093	ENSG00000246211	P4HA3-AS1	P4HA3 antisense RNA 1
chr22	19613232	19613680	449	*	Peak_6533	42	.	Distal Intergenic	22	19565203	19566839	1637	2	150185	ENST00000629028.1	-46393	NA	LINC00895	long intergenic non-protein coding RNA 895
chr10	49628310	49628573	264	*	Peak_6587	42	.	Intron (ENST00000339797.5/1103, intron 7 of 14)	10	49637400	49665067	27668	1	1103	ENST00000640822.1	-8827	ENSG00000070748	CHAT	choline O-acetyltransferase
chr11	102740225	102740569	345	*	Peak_6597	42	.	Distal Intergenic	11	102746968	102831511	84544	1	100288077	ENST00000371455.7	-6399	ENSG00000255282	WTAPP1	Wilms tumor 1 associated protein pseudogene 1
chr12	75013907	75014136	230	*	Peak_6605	42	.	Distal Intergenic	12	75048229	75050927	2699	2	3747	ENST00000548243.1	36791	ENSG00000166006	KCNC2	potassium voltage-gated channel subfamily C member 2
chr11	27560573	27560846	274	*	Peak_6693	41	.	Intron (ENST00000530686.5/497258, intron 1 of 5)	11	27514970	27515047	78	2	102465881	ENST00000612745.1	-45526	ENSG00000278483	MIR8087	microRNA 8087
chr5	43874012	43874259	248	*	Peak_6808	41	.	Distal Intergenic	5	43677779	43704744	26966	1	23530	ENST00000503059.1	196233	ENSG00000112992	NNT	nicotinamide nucleotide transhydrogenase
chr11	100458567	100458850	284	*	Peak_6715	41	.	Distal Intergenic	11	100687653	100993941	306289	1	143872	ENST00000524892.7	-228803	ENSG00000165895	ARHGAP42	Rho GTPase activating protein 42
chr1	66426139	66426493	355	*	Peak_6752	41	.	Distal Intergenic	1	66367494	66368157	664	1	5142	ENST00000483863.2	58645	ENSG00000184588	PDE4B	phosphodiesterase 4B
chr1	42116345	42116626	282	*	Peak_6740	41	.	Distal Intergenic	1	42153421	42155824	2404	1	2981	ENST00000372581.1	-36795	ENSG00000044012	GUCA2B	guanylate cyclase activator 2B
chr11	68685040	68685397	358	*	Peak_6834	41	.	Promoter (<=1kb)	11	68684475	68691175	6701	1	51083	ENST00000265643.3	565	ENSG00000069482	GAL	galanin and GMAP prepropeptide
chr5	83434981	83435213	233	*	Peak_6882	41	.	Distal Intergenic	5	83471465	83582303	110839	1	1462	ENST00000265077.7	-36252	ENSG00000038427	VCAN	versican
chr7	2619040	2619350	311	*	Peak_6938	41	.	Distal Intergenic	7	2631951	2664802	32852	1	80727	ENST00000258796.11	-12601	ENSG00000136295	TTYH3	tweety family member 3
chr11	95157443	95157672	230	*	Peak_6895	41	.	Exon (ENST00000501356.5/101929295, exon 2 of 3)	11	95151746	95233690	81945	1	100129203	ENST00000534891.5	5697	NA	LOC100129203	uncharacterized LOC100129203
chr1	180196592	180196878	287	*	Peak_6893	41	.	Promoter (<=1kb)	1	180196682	180198016	1335	1	5768	ENST00000443059.1	0	ENSG00000116260	QSOX1	quiescin sulfhydryl oxidase 1
chr1	225936163	225936506	344	*	Peak_6897	41	.	Exon (ENST00000513672.1/ENST00000513672.1, exon 2 of 2)	1	225939432	225940101	670	2	7044	ENST00000474493.1	3595	ENSG00000143768	LEFTY2	left-right determination factor 2
chr17	43634106	43634365	260	*	Peak_6910	41	.	Distal Intergenic	17	43640402	43661563	21162	2	4222	ENST00000329168.3	27198	ENSG00000005102	MEOX1	mesenchyme homeobox 1
chr1	59581828	59582076	249	*	Peak_6966	41	.	Intron (ENST00000634606.1/55277, intron 7 of 16)	1	59553918	59762728	208811	1	55277	ENST00000371210.1	27910	ENSG00000172456	FGGY	FGGY carbohydrate kinase domain containing
chr19	46137173	46137418	246	*	Peak_7025	41	.	Exon (ENST00000558095.2/ENST00000558095.2, exon 1 of 1)	19	46143106	46161288	18183	1	147920	ENST00000600243.5	-5688	ENSG00000204866	IGFL2	IGF like family member 2
chr13	28806382	28806631	250	*	Peak_7115	41	.	Distal Intergenic	13	28820348	29505947	685600	1	23281	ENST00000612955.4	-13717	ENSG00000132938	MTUS2	microtubule associated scaffold protein 2
chr1	11410543	11411033	491	*	Peak_7087	41	.	Distal Intergenic	1	11479166	11481960	2795	1	57540	ENST00000423056.2	-68133	ENSG00000204624	DISP3	dispatched RND transporter family member 3
chr2	196357361	196357668	308	*	Peak_7160	41	.	Intron (ENST00000260983.8/57520, intron 2 of 28)	2	196322478	196361832	39355	2	57520	ENST00000647314.1	4164	ENSG00000138411	HECW2	HECT, C2 and WW domain containing E3 ubiquitin protein ligase 2
chr11	27228176	27228549	374	*	Peak_7093	41	.	Distal Intergenic	11	27062983	27220113	157131	2	103695435	ENST00000525302.5	-8063	ENSG00000254560	BBOX1-AS1	BBOX1 antisense RNA 1
chr9	4419706	4419996	291	*	Peak_7229	41	.	Distal Intergenic	9	4490444	4587469	97026	1	6505	ENST00000262352.7	-70448	ENSG00000106688	SLC1A1	solute carrier family 1 member 1
chr15	99020998	99021238	241	*	Peak_7124	41	.	Intron (ENST00000559468.1/ENST00000559468.1, intron 2 of 3)	15	98968230	99007795	39566	2	145814	ENST00000535714.1	-13203	ENSG00000183571	PGPEP1L	pyroglutamyl-peptidase I like
chr8	73049417	73049828	412	*	Peak_7308	40	.	Distal Intergenic	8	73031613	73038804	7192	1	7013	ENST00000520783.1	17804	ENSG00000147601	TERF1	telomeric repeat binding factor 1
chr13	38077837	38078199	363	*	Peak_7283	40	.	Intron (ENST00000434565.5/100874188, intron 3 of 5)	13	38053920	38061453	7534	2	100874188	ENST00000451826.1	-16384	ENSG00000223685	LINC00571	long intergenic non-protein coding RNA 571
chr1	26160463	26161114	652	*	Peak_7313	40	.	Promoter (1-2kb)	1	26159020	26163962	4943	1	79927	ENST00000374268.4	1443	ENSG00000197245	FAM110D	family with sequence similarity 110 member D
chr17	80920274	80920510	237	*	Peak_7344	40	.	Promoter (2-3kb)	17	80922724	80924172	1449	1	57521	ENST00000576366.1	-2214	ENSG00000141564	RPTOR	regulatory associated protein of MTOR complex 1
chr11	3041576	3041873	298	*	Peak_7412	40	.	Promoter (1-2kb)	11	3038131	3040088	1958	2	833	ENST00000465207.5	-1488	ENSG00000110619	CARS	cysteinyl-tRNA synthetase
chr8	27509658	27509887	230	*	Peak_8100	40	.	Intron (ENST00000521400.5/2053, intron 5 of 18)	8	27505047	27512100	7054	1	2053	ENST00000521924.1	4611	ENSG00000120915	EPHX2	epoxide hydrolase 2
chr8	62123431	62123683	253	*	Peak_8117	40	.	Distal Intergenic	8	62248591	62965629	717039	1	286183	ENST00000519049.5	-124908	ENSG00000185942	NKAIN3	sodium/potassium transporting ATPase interacting 3
chr11	89203386	89203615	230	*	Peak_7522	40	.	Intron (ENST00000263321.5/7299, intron 2 of 4)	11	89177893	89200611	22719	1	7299	ENST00000526139.1	25493	ENSG00000077498	TYR	tyrosinase
chr7	31704310	31704539	230	*	Peak_8061	40	.	Intron (ENST00000342032.7/10842, intron 4 of 4)	7	31695963	31707596	11634	1	10842	ENST00000498609.1	8347	ENSG00000106341	PPP1R17	protein phosphatase 1 regulatory subunit 17
chr2	73293129	73293363	235	*	Peak_7845	40	.	Promoter (<=1kb)	2	73290930	73293701	2772	2	1961	ENST00000545030.1	338	ENSG00000135625	EGR4	early growth response 4
chr6	117908048	117908277	230	*	Peak_8004	40	.	Promoter (<=1kb)	6	117907526	118317676	410151	1	222553	ENST00000360388.8	522	ENSG00000196376	SLC35F1	solute carrier family 35 member F1
chr14	75360495	75360757	263	*	Peak_7629	40	.	Distal Intergenic	14	75294407	75296638	2232	1	731223	ENST00000558575.1	66088	NA	LINC01220	long intergenic non-protein coding RNA 1220
chr14	80899292	80899521	230	*	Peak_7634	40	.	Intron (ENST00000281129.7/145508, intron 6 of 23)	14	80830165	80904928	74764	2	145508	ENST00000554827.5	5407	ENSG00000100629	CEP128	centrosomal protein 128
chr11	46207644	46207898	255	*	Peak_7486	40	.	Distal Intergenic	11	46171947	46177105	5159	1	101928894	ENST00000533793.1	35697	ENSG00000255314	LOC101928894	uncharacterized LOC101928894
chr2	95840185	95840414	230	*	Peak_7848	40	.	Intron (ENST00000612359.4/400986, intron 5 of 5)	2	95836919	95855377	18459	2	400986	ENST00000612359.4	14963	ENSG00000174501	ANKRD36C	ankyrin repeat domain 36C
chr5	35709299	35709561	263	*	Peak_7969	40	.	3' UTR	5	35700623	35705791	5169	1	79925	ENST00000508817.1	8676	ENSG00000152582	SPEF2	sperm flagellar 2
chr20	24512613	24512855	243	*	Peak_7756	40	.	Intron (ENST00000376862.3/79953, intron 1 of 3)	20	24469199	24666616	197418	1	79953	ENST00000376862.3	43414	ENSG00000101463	SYNDIG1	synapse differentiation inducing 1
chr6	148881494	148881733	240	*	Peak_8017	40	.	Intron (ENST00000367463.4/10090, intron 1 of 7)	6	148953907	149005588	51682	1	10090	ENST00000473631.1	-72174	ENSG00000111962	UST	uronyl 2-sulfotransferase
chr20	40695240	40695469	230	*	Peak_7759	40	.	Distal Intergenic	20	40685848	40689240	3393	2	9935	ENST00000373313.2	-6000	ENSG00000204103	MAFB	MAF bZIP transcription factor B
chr2	103139411	103139687	277	*	Peak_7771	40	.	Intron (ENST00000422683.1/ENST00000422683.1, intron 2 of 3)	2	102967408	102984429	17022	2	105373519	ENST00000431897.1	-154982	ENSG00000224095	LINC01935	long intergenic non-protein coding RNA 1935
chr1	70474893	70475172	280	*	Peak_8178	40	.	Distal Intergenic	1	70434851	70439232	4382	1	1491	ENST00000482383.1	40042	ENSG00000116761	CTH	cystathionine gamma-lyase
chr3	14626719	14626971	253	*	Peak_8235	40	.	Intron (ENST00000635800.1/ENST00000635800.1, intron 1 of 2)	3	14651746	14672653	20908	1	51244	ENST00000611584.4	-24775	ENSG00000154781	CCDC174	coiled-coil domain containing 174
chr9	124504203	124504455	253	*	Peak_8306	40	.	Promoter (2-3kb)	9	124500427	124507235	6809	2	2516	ENST00000455734.1	2780	ENSG00000136931	NR5A1	nuclear receptor subfamily 5 group A member 1
chr6	17050885	17051287	403	*	Peak_8303	40	.	Distal Intergenic	6	17102258	17131372	29115	1	401236	ENST00000536551.5	-50971	ENSG00000230873	STMND1	stathmin domain containing 1
chr3	4054192	4054492	301	*	Peak_8356	39	.	Intron (ENST00000448413.5/285362, intron 9 of 12)	3	4303304	4317567	14264	1	6419	ENST00000358065.4	-248812	ENSG00000170364	SETMAR	SET domain and mariner transposase fusion gene
chr1	100333253	100333490	238	*	Peak_8372	39	.	Distal Intergenic	1	100345001	100499460	154460	1	8556	ENST00000644844.1	-11511	ENSG00000079335	CDC14A	cell division cycle 14A
chr1	204337968	204338233	266	*	Peak_8460	39	.	Intron (ENST00000272203.7/22874, intron 1 of 22)	1	204218851	204359916	141066	2	22874	ENST00000272203.7	21683	ENSG00000143850	PLEKHA6	pleckstrin homology domain containing A6
chr11	71368922	71369201	280	*	Peak_8458	39	.	Distal Intergenic	11	71405746	71423354	17609	2	399923	ENST00000331301.8	54153	ENSG00000172900	FLJ42102	uncharacterized LOC399923
chr19	5419833	5420197	365	*	Peak_8472	39	.	Distal Intergenic	19	5455431	5456856	1426	1	148066	ENST00000222033.5	-35234	ENSG00000105428	ZNRF4	zinc and ring finger 4
chr20	63412047	63412457	411	*	Peak_8475	39	.	Promoter (<=1kb)	20	63408475	63411814	3340	2	3785	ENST00000636614.1	-233	ENSG00000075043	KCNQ2	potassium voltage-gated channel subfamily Q member 2
chr18	10476275	10476578	304	*	Peak_8468	39	.	3' UTR	18	10472007	10487814	15808	1	147495	ENST00000579685.1	4268	ENSG00000154856	APCDD1	APC down-regulated 1
chr6	31387165	31387535	371	*	Peak_8484	39	.	Distal Intergenic	6	31399784	31415313	15530	1	100507436	ENST00000616296.4	-12249	ENSG00000204520	MICA	MHC class I polypeptide-related sequence A
chr1	8244969	8245198	230	*	Peak_8469	39	.	Distal Intergenic	1	8208672	8215210	6539	1	102724539	ENST00000452982.1	36297	ENSG00000227634	LINC01714	long intergenic non-protein coding RNA 1714
chr6	42125674	42125963	290	*	Peak_8537	39	.	Intron (ENST00000341865.8/647024, intron 2 of 4)	6	42101118	42142444	41327	2	647024	ENST00000341865.8	16481	ENSG00000188112	C6orf132	chromosome 6 open reading frame 132
chr2	86027561	86027790	230	*	Peak_8570	39	.	Promoter (1-2kb)	2	86027966	86028799	834	2	25885	ENST00000471427.1	1009	ENSG00000068654	POLR1A	RNA polymerase I subunit A
chr11	73010816	73011263	448	*	Peak_8566	39	.	Intron (ENST00000311172.11/9873, intron 3 of 18)	11	72983765	72989012	5248	2	9873	ENST00000543644.1	-21804	ENSG00000137478	FCHSD2	FCH and double SH3 domains 2
chr5	77642441	77642699	259	*	Peak_8610	39	.	Promoter (2-3kb)	5	77628712	77639688	10977	2	23440	ENST00000306422.4	-2753	ENSG00000171540	OTP	orthopedia homeobox
chr16	74373291	74373613	323	*	Peak_8645	39	.	Distal Intergenic	16	74377878	74392080	14203	1	440348	ENST00000429990.1	-4265	ENSG00000196436	NPIPB15	nuclear pore complex interacting protein family member B15
chr15	66023834	66024157	324	*	Peak_8699	39	.	Intron (ENST00000409699.6/84465, intron 5 of 22)	15	66040233	66040332	100	1	100422905	ENST00000580794.1	-16076	ENSG00000263512	MIR4311	microRNA 4311
chr11	71143170	71143549	380	*	Peak_8678	39	.	Intron (ENST00000601538.5/22941, intron 2 of 24)	11	70952702	71094688	141987	2	22941	ENST00000458632.2	-48482	ENSG00000162105	SHANK2	SH3 and multiple ankyrin repeat domains 2
chr3	161760537	161760956	420	*	Peak_8740	39	.	Distal Intergenic	3	161496808	161503942	7135	1	131149	ENST00000327928.4	263729	ENSG00000182447	OTOL1	otolin 1
chr1	47667606	47667840	235	*	Peak_8795	38	.	Distal Intergenic	1	47436017	47440691	4675	1	2306	ENST00000334793.5	231589	ENSG00000186564	FOXD2	forkhead box D2
chr5	154657847	154658341	495	*	Peak_8819	38	.	Distal Intergenic	5	154685776	154685861	86	1	100302284	ENST00000408625.1	-27435	ENSG00000221552	MIR1303	microRNA 1303
chr16	1060784	1061086	303	*	Peak_8888	38	.	Distal Intergenic	16	1066376	1067236	861	2	146336	ENST00000569734.1	6150	ENSG00000261713	SSTR5-AS1	SSTR5 antisense RNA 1
chr1	45253538	45253789	252	*	Peak_8950	38	.	Intron (ENST00000464588.1/57643, intron 2 of 2)	1	45016399	45206556	190158	2	57643	ENST00000359600.5	-46982	ENSG00000162415	ZSWIM5	zinc finger SWIM-type containing 5
chr8	142801088	142801462	375	*	Peak_9026	38	.	Exon (ENST00000637396.2/ENST00000637396.2, exon 2 of 3)	8	142784880	142786592	1713	2	8581	ENST00000301263.4	-14496	ENSG00000167656	LY6D	lymphocyte antigen 6 family member D
chr8	38651249	38651506	258	*	Peak_9073	38	.	Distal Intergenic	8	38600661	38601200	540	2	286140	ENST00000524091.1	-50049	NA	RNF5P1	ring finger protein 5 pseudogene 1
chr11	14558750	14559117	368	*	Peak_9082	38	.	Intron (ENST00000418988.2/5682, intron 2 of 10)	11	14504876	14520696	15821	2	5682	ENST00000396394.6	-38054	ENSG00000129084	PSMA1	proteasome subunit alpha 1
chr13	36553666	36554043	378	*	Peak_9136	38	.	Distal Intergenic	13	36673912	36697839	23928	1	400120	ENST00000315190.3	-119869	ENSG00000180440	SERTM1	serine rich and transmembrane domain containing 1
chr12	120741738	120741967	230	*	Peak_9135	38	.	Intron (ENST00000542620.1/ENST00000542620.1, intron 1 of 2)	12	120725861	120739594	13734	1	35	ENST00000411593.2	15877	ENSG00000122971	ACADS	acyl-CoA dehydrogenase short chain
chr1	29326093	29326393	301	*	Peak_9165	38	.	Promoter (2-3kb)	1	29323218	29325650	2433	1	10076	ENST00000492954.1	2875	ENSG00000060656	PTPRU	protein tyrosine phosphatase receptor type U
chr3	52476497	52476757	261	*	Peak_9237	37	.	Promoter (<=1kb)	3	52476298	52478282	1985	1	11188	ENST00000481211.1	199	ENSG00000010322	NISCH	nischarin
chr14	19732902	19733352	451	*	Peak_9279	37	.	Intron (ENST00000557414.1/390429, intron 1 of 4)	14	19719015	19827513	108499	1	390429	ENST00000557414.1	13887	ENSG00000176294	OR4N2	olfactory receptor family 4 subfamily N member 2
chr14	19852918	19853162	245	*	Peak_9307	37	.	Distal Intergenic	14	19868197	19869143	947	2	283617	ENST00000425829.2	15981	ENSG00000176290	OR4K3	olfactory receptor family 4 subfamily K member 3 (gene/pseudogene)
chr3	9922599	9922869	271	*	Peak_9319	37	.	Promoter (1-2kb)	3	9924022	9932701	8680	1	84818	ENST00000464406.5	-1153	ENSG00000163702	IL17RC	interleukin 17 receptor C
chr6	4486391	4486756	366	*	Peak_9324	37	.	Intron (ENST00000642310.1/ENST00000642310.1, intron 2 of 4)	6	4491807	4495769	3963	1	105374895	ENST00000563079.1	-5051	NA	LINC02533	long intergenic non-protein coding RNA 2533
chr1	12075450	12075686	237	*	Peak_9331	37	.	Intron (ENST00000417814.3/943, intron 1 of 13)	1	12063470	12143117	79648	1	943	ENST00000514649.5	11980	ENSG00000120949	TNFRSF8	TNF receptor superfamily member 8
chr11	15097793	15098477	685	*	Peak_9330	37	.	Distal Intergenic	11	15112424	15247208	134785	1	387755	ENST00000379554.7	-13947	ENSG00000188487	INSC	INSC spindle orientation adaptor protein
chr5	120399268	120399698	431	*	Peak_9382	37	.	Intron (ENST00000569928.1/ENST00000569928.1, intron 1 of 1)	5	120464278	120687332	223055	1	51334	ENST00000407149.6	-64580	ENSG00000184838	PRR16	proline rich 16
chr16	15666698	15666979	282	*	Peak_9352	37	.	Intron (ENST00000396355.5/54820, intron 3 of 9)	16	15672663	15687468	14806	1	54820	ENST00000574163.1	-5684	ENSG00000072864	NDE1	nudE neurodevelopment protein 1
chr11	82875508	82875751	244	*	Peak_9465	37	.	Intron (ENST00000313010.7/5547, intron 1 of 8)	11	82853194	82858771	5578	2	5547	ENST00000534264.1	-16737	ENSG00000137509	PRCP	prolylcarboxypeptidase
chr1	92611341	92611575	235	*	Peak_9487	37	.	Intron (ENST00000370331.5/7813, intron 14 of 17)	1	92607449	92625934	18486	2	7813	ENST00000492513.5	14359	ENSG00000067208	EVI5	ecotropic viral integration site 5
chr1	65956257	65956668	412	*	Peak_9603	37	.	Intron (ENST00000329654.8/5142, intron 3 of 16)	1	65992422	66374573	382152	1	5142	ENST00000423207.6	-35754	ENSG00000184588	PDE4B	phosphodiesterase 4B
chr8	60993294	60993532	239	*	Peak_9715	36	.	Distal Intergenic	8	60965802	60967775	1974	2	100130298	ENST00000525556.1	-25519	NA	LOC100130298	hCG1816373-like
chr17	72094801	72095207	407	*	Peak_9792	36	.	Intron (ENST00000602213.5/400618, intron 1 of 5)	17	72081921	72089120	7200	2	400618	ENST00000533039.2	-5681	ENSG00000234899	SOX9-AS1	SOX9 antisense RNA 1
chr8	27641364	27641624	261	*	Peak_10083	36	.	Intron (ENST00000337221.8/51435, intron 1 of 5)	8	27634181	27673020	38840	1	51435	ENST00000301904.3	7183	ENSG00000168077	SCARA3	scavenger receptor class A member 3
chr8	101231869	101232500	632	*	Peak_10078	36	.	Distal Intergenic	8	101201716	101206193	4478	2	51123	ENST00000520454.1	-25676	ENSG00000120963	ZNF706	zinc finger protein 706
chr8	66328460	66328689	230	*	Peak_10084	36	.	Distal Intergenic	8	66419589	66428977	9389	2	100505676	ENST00000499642.1	100288	ENSG00000246145	RRS1-AS1	RRS1 antisense RNA 1 (head to head)
chr8	74016750	74017030	281	*	Peak_10086	36	.	Intron (ENST00000284818.6/23643, intron 3 of 4)	8	73991426	74029074	37649	1	23643	ENST00000518893.1	25324	ENSG00000154589	LY96	lymphocyte antigen 96
chr2	8132481	8132869	389	*	Peak_10010	36	.	Intron (ENST00000456681.1/339788, intron 1 of 3)	2	8039934	8118324	78391	2	339789	ENST00000454043.1	-14157	ENSG00000236790	LINC00299	long intergenic non-protein coding RNA 299
chr8	144913730	144914022	293	*	Peak_10082	36	.	Distal Intergenic	8	144889966	144902168	12203	2	58500	ENST00000527049.1	-11562	ENSG00000196150	ZNF250	zinc finger protein 250
chr12	68893513	68893820	308	*	Peak_9917	36	.	Intron (ENST00000551568.5/1368, intron 2 of 8)	12	68866825	68870382	3558	2	1368	ENST00000546912.1	-23131	ENSG00000135678	CPM	carboxypeptidase M
chr11	83436554	83437142	589	*	Peak_9897	36	.	Distal Intergenic	11	83459508	83462149	2642	2	1740	ENST00000529159.1	25007	ENSG00000150672	DLG2	discs large MAGUK scaffold protein 2
chr2	24565507	24565739	233	*	Peak_10005	36	.	Promoter (1-2kb)	2	24564310	24768543	204234	1	8648	ENST00000407230.5	1197	ENSG00000084676	NCOA1	nuclear receptor coactivator 1
chr5	144653862	144654220	359	*	Peak_10041	36	.	Distal Intergenic	5	144205277	144485686	280410	1	57528	ENST00000507359.3	448585	ENSG00000183775	KCTD16	potassium channel tetramerization domain containing 16
chr1	69105743	69105992	250	*	Peak_9950	36	.	Intron (ENST00000425517.1/105378785, intron 3 of 4)	1	69055898	69185003	129106	1	105378785	ENST00000425517.1	49845	ENSG00000223883	LINC01707	long intergenic non-protein coding RNA 1707
chr1	7240529	7240803	275	*	Peak_9952	36	.	Intron (ENST00000303635.11/23261, intron 4 of 22)	1	7388183	7389419	1237	2	102725193	ENST00000411708.1	148616	ENSG00000237728	LOC102725193	uncharacterized LOC102725193
chr4	153719270	153719604	335	*	Peak_10031	36	.	Intron (ENST00000347063.8/285533, intron 6 of 8)	4	153720270	153748749	28480	2	285533	ENST00000508967.5	29145	ENSG00000145428	RNF175	ring finger protein 175
chr11	8522410	8522689	280	*	Peak_9899	36	.	Intron (ENST00000315204.5/65975, intron 2 of 13)	11	8474819	8565911	91093	2	65975	ENST00000526360.1	43222	ENSG00000130413	STK33	serine/threonine kinase 33
chr8	48146471	48146764	294	*	Peak_10116	36	.	Distal Intergenic	8	48049580	48061315	11736	1	7336	ENST00000521628.1	96891	ENSG00000169139	UBE2V2	ubiquitin conjugating enzyme E2 V2
chr1	19044725	19044954	230	*	Peak_10118	36	.	Distal Intergenic	1	19074567	19077827	3261	2	23352	ENST00000486515.1	32873	ENSG00000127481	UBR4	ubiquitin protein ligase E3 component n-recognin 4
chr13	34322402	34322652	251	*	Peak_10156	36	.	Distal Intergenic	13	34348043	34614170	266128	1	105370158	ENST00000605909.1	-25391	NA	LINC02343	long intergenic non-protein coding RNA 2343
chr11	93848041	93848374	334	*	Peak_10191	36	.	Promoter (2-3kb)	11	93818232	93850531	32300	2	387804	ENST00000409977.1	2157	ENSG00000214376	VSTM5	V-set and transmembrane domain containing 5
chr17	82248410	82249136	727	*	Peak_10234	35	.	Promoter (<=1kb)	17	82239023	82248980	9958	2	1453	ENST00000584672.1	0	ENSG00000141551	CSNK1D	casein kinase 1 delta
chr20	25039577	25039892	316	*	Peak_10236	35	.	Intron (ENST00000432802.6/84532, intron 2 of 11)	20	25006230	25032706	26477	2	84532	ENST00000537502.5	-6871	ENSG00000154930	ACSS1	acyl-CoA synthetase short chain family member 1
chr19	919836	920157	322	*	Peak_10235	35	.	Promoter (2-3kb)	19	917503	920748	3246	1	84634	ENST00000606939.2	2333	ENSG00000116014	KISS1R	KISS1 receptor
chr20	37609385	37609731	347	*	Peak_10335	35	.	Distal Intergenic	20	37619298	37623119	3822	2	100861522	ENST00000457816.1	13388	ENSG00000225759	LINC00489	long intergenic non-protein coding RNA 489
chr11	62171769	62172003	235	*	Peak_10342	35	.	Distal Intergenic	11	62190216	62193539	3324	1	10648	ENST00000306238.3	-18213	ENSG00000168515	SCGB1D1	secretoglobin family 1D member 1
chr1	30902662	30902899	238	*	Peak_10366	35	.	Intron (ENST00000339394.6/9672, intron 1 of 4)	1	30873135	30908761	35627	2	9672	ENST00000339394.6	5862	ENSG00000162512	SDC3	syndecan 3
chr6	144597172	144597428	257	*	Peak_10400	35	.	Intron (ENST00000367545.7/7402, intron 50 of 73)	6	144583210	144851003	267794	1	7402	ENST00000367526.8	13962	ENSG00000152818	UTRN	utrophin
chr20	44400506	44400866	361	*	Peak_10386	35	.	Promoter (<=1kb)	20	44401270	44431386	30117	1	3172	ENST00000372920.1	-404	ENSG00000101076	HNF4A	hepatocyte nuclear factor 4 alpha
chr1	25152479	25152897	419	*	Peak_10540	35	.	Distal Intergenic	1	25229015	25232432	3418	2	25949	ENST00000474160.1	79535	ENSG00000117614	SYF2	SYF2 pre-mRNA splicing factor
chr6	55280209	55280450	242	*	Peak_10878	35	.	Exon (ENST00000615358.4/3062, exon 7 of 8)	6	55327469	55402493	75025	1	389400	ENST00000340465.2	-47019	ENSG00000187871	GFRAL	GDNF family receptor alpha like
chr7	6699531	6699893	363	*	Peak_10894	35	.	Promoter (1-2kb)	7	6688433	6700914	12482	2	7559	ENST00000404360.5	1021	ENSG00000164631	ZNF12	zinc finger protein 12
chr5	112644022	112644290	269	*	Peak_10796	35	.	Distal Intergenic	5	112628857	112630565	1709	1	102467214	ENST00000513687.1	15165	NA	LINC02200	long intergenic non-protein coding RNA 2200
chr18	35759892	35760281	390	*	Peak_10645	35	.	Distal Intergenic	18	35654656	35709780	55125	1	2589	ENST00000590654.1	105236	ENSG00000141429	GALNT1	polypeptide N-acetylgalactosaminyltransferase 1
chr11	2665811	2666085	275	*	Peak_10478	35	.	Exon (ENST00000597346.1/10984, exon 1 of 1)	11	2608328	2699994	91667	2	10984	ENST00000597346.1	33909	ENSG00000269821	KCNQ1OT1	KCNQ1 opposite strand/antisense transcript 1
chr5	98537621	98537874	254	*	Peak_10849	35	.	Distal Intergenic	5	98768650	98779919	11270	1	285704	ENST00000504776.5	-230776	ENSG00000174136	RGMB	repulsive guidance molecule BMP co-receptor b
chr3	172993233	172993462	230	*	Peak_10753	35	.	Intron (ENST00000351008.3/83893, intron 4 of 10)	3	172889358	173141268	251911	2	83893	ENST00000351008.3	147806	ENSG00000144962	SPATA16	spermatogenesis associated 16
chr9	127155047	127155289	243	*	Peak_10926	35	.	Intron (ENST00000424082.6/9649, intron 8 of 17)	9	127087332	127122883	35552	2	23452	ENST00000373425.7	-32164	ENSG00000136859	ANGPTL2	angiopoietin like 2
chr18	50123551	50123872	322	*	Peak_10648	35	.	Promoter (2-3kb)	18	50126499	50126563	65	2	100422865	ENST00000636981.1	2691	ENSG00000283343	MIR4320	microRNA 4320
chr5	168882452	168882683	232	*	Peak_10816	35	.	Promoter (<=1kb)	5	168661733	168883338	221606	2	6586	ENST00000404867.7	655	ENSG00000184347	SLIT3	slit guidance ligand 3
chr20	61664300	61664607	308	*	Peak_10694	35	.	Intron (ENST00000614565.4/1002, intron 2 of 15)	20	61717506	61719748	2243	2	100128310	ENST00000317652.1	55141	ENSG00000179253	LOC100128310	uncharacterized LOC100128310
chr3	47954374	47954751	378	*	Peak_10770	35	.	Intron (ENST00000395734.7/4134, intron 3 of 17)	3	47877327	47928302	50976	2	4134	ENST00000482752.1	-26072	ENSG00000047849	MAP4	microtubule associated protein 4
chr2	101027194	101027439	246	*	Peak_10695	35	.	Promoter (2-3kb)	2	101028345	101029972	1628	2	11138	ENST00000485875.1	2533	ENSG00000204634	TBC1D8	TBC1 domain family member 8
chr6	133188934	133189163	230	*	Peak_10970	35	.	Distal Intergenic	6	133240598	133528902	288305	1	2070	ENST00000452339.6	-51435	ENSG00000112319	EYA4	EYA transcriptional coactivator and phosphatase 4
chr20	32196176	32196590	415	*	Peak_11046	35	.	3' UTR	20	32189202	32190527	1326	2	128854	ENST00000476365.2	-5649	ENSG00000235217	TSPY26P	testis specific protein Y-linked 26, pseudogene
chr17	1509723	1510044	322	*	Peak_11186	34	.	Promoter (1-2kb)	17	1498061	1508500	10440	2	51763	ENST00000481867.1	-1223	ENSG00000132376	INPP5K	inositol polyphosphate-5-phosphatase K
chr2	6659508	6659737	230	*	Peak_11224	34	.	Distal Intergenic	2	6649152	6650535	1384	2	102800314	ENST00000592816.1	-8973	ENSG00000236172	MIR7515HG	MIR7515 host gene
chr5	176850620	176850904	285	*	Peak_11236	34	.	Intron (ENST00000329542.8/90249, intron 1 of 14)	5	176862624	176874400	11777	1	90249	ENST00000513890.1	-11720	ENSG00000113763	UNC5A	unc-5 netrin receptor A
chr6	17223826	17224089	264	*	Peak_11283	34	.	Distal Intergenic	6	17281346	17293875	12530	1	221662	ENST00000379052.9	-57257	ENSG00000112183	RBM24	RNA binding motif protein 24
chr19	44580852	44581279	428	*	Peak_11292	34	.	Intron (ENST00000455455.1/388550, intron 1 of 3)	19	44537058	44556917	19860	2	388550	ENST00000446628.5	-23935	ENSG00000230666	CEACAM22P	carcinoembryonic antigen related cell adhesion molecule 22, pseudogene
chr17	21298414	21298953	540	*	Peak_11307	34	.	5' UTR	17	21291469	21314965	23497	1	5606	ENST00000613338.4	6945	ENSG00000034152	MAP2K3	mitogen-activated protein kinase kinase 3
chr9	86765595	86765835	241	*	Peak_12744	34	.	Distal Intergenic	9	86944363	86947189	2827	2	2619	ENST00000298743.8	181354	ENSG00000180447	GAS1	growth arrest specific 1
chr5	16196336	16196804	469	*	Peak_12337	34	.	Distal Intergenic	5	16090887	16180762	89876	2	441061	ENST00000505509.1	-15574	ENSG00000183654	2022-03-11	membrane associated ring-CH-type finger 11
chr1	204730637	204730866	230	*	Peak_11495	34	.	Distal Intergenic	1	204617170	204685733	68564	2	10446	ENST00000367177.3	-44904	ENSG00000170382	LRRN2	leucine rich repeat neuronal 2
chr3	194277201	194277430	230	*	Peak_12181	34	.	Intron (ENST00000440556.1/ENST00000440556.1, intron 2 of 2)	3	194203016	194250153	47138	2	100505920	ENST00000415869.5	-27048	ENSG00000225742	LINC02036	long intergenic non-protein coding RNA 2036
chr3	157746272	157746516	245	*	Peak_12157	34	.	Distal Intergenic	3	157543444	157601082	57639	1	152078	ENST00000426338.2	202828	ENSG00000174899	PQLC2L	PQ loop repeat containing 2 like
chr14	92300058	92300387	330	*	Peak_11708	34	.	Distal Intergenic	14	92322581	92496251	173671	1	123041	ENST00000393265.6	-22194	ENSG00000140090	SLC24A4	solute carrier family 24 member 4
chr15	55803182	55803465	284	*	Peak_11737	34	.	Distal Intergenic	15	55738223	55743090	4868	2	283659	ENST00000561292.1	-60092	ENSG00000166450	PRTG	protogenin
chr9	125735266	125735772	507	*	Peak_12798	34	.	Distal Intergenic	9	125743754	125745740	1987	2	51145	ENST00000444800.1	9968	NA	LOC51145	uncharacterized LOC51145
chr10	120375006	120375298	293	*	Peak_12802	34	.	Distal Intergenic	10	120354701	120355183	483	2	6144	ENST00000495531.1	-19823	ENSG00000122026	RPL21	ribosomal protein L21
chr12	52117531	52117799	269	*	Peak_12820	34	.	Distal Intergenic	12	52093569	52108250	14682	1	26628	ENST00000546981.1	23962	ENSG00000257542	OR7E47P	olfactory receptor family 7 subfamily E member 47 pseudogene
chr20	49238411	49238694	284	*	Peak_12836	34	.	3' UTR	20	49233838	49244077	10240	1	55661	ENST00000471144.1	4573	ENSG00000124228	DDX27	DEAD-box helicase 27
chr6	4157110	4157630	521	*	Peak_12843	34	.	Exon (ENST00000427049.2/100507506, exon 4 of 4)	6	4136072	4157385	21314	1	100507506	ENST00000427049.2	21038	ENSG00000234817	LOC100507506	uncharacterized LOC100507506
chr20	33878151	33878448	298	*	Peak_12898	34	.	Distal Intergenic	20	33811304	33854366	43063	1	128866	ENST00000217402.2	66847	ENSG00000101421	CHMP4B	charged multivesicular body protein 4B
chr11	11530930	11531304	375	*	Peak_12894	34	.	Intron (ENST00000227756.4/374378, intron 1 of 10)	11	11475177	11621758	146582	2	374378	ENST00000526064.1	90454	ENSG00000110328	GALNT18	polypeptide N-acetylgalactosaminyltransferase 18
chr1	53619608	53619837	230	*	Peak_12934	34	.	Intron (ENST00000312233.4/148979, intron 1 of 9)	1	53506237	53734204	227968	2	148979	ENST00000312233.4	114367	ENSG00000174332	GLIS1	GLIS family zinc finger 1
chr7	27148114	27148558	445	*	Peak_13002	34	.	Promoter (<=1kb)	7	27145396	27147774	2379	2	3203	ENST00000222728.3	-340	ENSG00000106006	HOXA6	homeobox A6
chr2	4103997	4104388	392	*	Peak_12972	34	.	Distal Intergenic	2	3957655	3974070	16416	2	100505964	ENST00000454455.5	-129927	ENSG00000237401	LINC01304	long intergenic non-protein coding RNA 1304
chr9	33692659	33692905	247	*	Peak_13028	34	.	Distal Intergenic	9	33673504	33677499	3996	2	11191	ENST00000532280.1	-15160	ENSG00000237984	PTENP1	phosphatase and tensin homolog pseudogene 1
chr1	9351519	9351909	391	*	Peak_13032	34	.	Promoter (<=1kb)	1	9351431	9367863	16433	1	80176	ENST00000357898.3	88	ENSG00000171621	SPSB1	splA/ryanodine receptor domain and SOCS box containing 1
chr11	15439151	15439443	293	*	Peak_13166	33	.	Distal Intergenic	11	15235145	15246318	11174	1	387755	ENST00000526102.1	204006	ENSG00000188487	INSC	INSC spindle orientation adaptor protein
chr1	11674533	11674798	266	*	Peak_13320	33	.	3' UTR	1	11668696	11674030	5335	1	26270	ENST00000449067.1	5837	ENSG00000116663	FBXO6	F-box protein 6
chr2	5538351	5538618	268	*	Peak_13397	33	.	Distal Intergenic	2	5677142	5691046	13905	2	102723818	ENST00000420221.1	152428	NA	LINC01248	long intergenic non-protein coding RNA 1248
chr5	96972156	96972410	255	*	Peak_13407	33	.	Intron (ENST00000231368.9/4012, intron 1 of 17)	5	96958451	97029036	70586	1	4012	ENST00000395770.3	13705	ENSG00000113441	LNPEP	leucyl and cystinyl aminopeptidase
chr7	6158808	6159060	253	*	Peak_13483	33	.	Intron (ENST00000306177.9/84132, intron 16 of 17)	7	6164740	6170221	5482	2	9265	ENST00000465320.1	11161	ENSG00000008256	CYTH3	cytohesin 3
chr2	1869635	1869942	308	*	Peak_13584	32	.	Intron (ENST00000647755.1/23040, intron 18 of 24)	2	1789241	1861677	72437	2	23040	ENST00000648299.1	-7958	ENSG00000186487	MYT1L	myelin transcription factor 1 like
chr17	45883242	45883506	265	*	Peak_13605	32	.	Intron (ENST00000634876.1/100128977, intron 1 of 6)	17	45894382	46028334	133953	1	4137	ENST00000262410.9	-10876	ENSG00000186868	MAPT	microtubule associated protein tau
chr2	85858413	85858753	341	*	Peak_13618	32	.	Promoter (1-2kb)	2	85839194	85856448	17255	2	8869	ENST00000639743.1	-1965	ENSG00000115525	ST3GAL5	ST3 beta-galactoside alpha-2,3-sialyltransferase 5
chr3	13683905	13684189	285	*	Peak_13620	32	.	Intron (ENST00000438915.1/285375, intron 1 of 1)	3	13650721	13746637	95917	1	285375	ENST00000419618.2	33184	ENSG00000224514	LINC00620	long intergenic non-protein coding RNA 620
chr18	11236649	11236943	295	*	Peak_13965	32	.	Distal Intergenic	18	10670248	11148762	478515	2	63895	ENST00000383408.6	-87887	ENSG00000154864	PIEZO2	piezo type mechanosensitive ion channel component 2
chr3	128694703	128694932	230	*	Peak_14285	31	.	Distal Intergenic	3	128620159	128681075	60917	2	6184	ENST00000497289.5	-13628	ENSG00000163902	RPN1	ribophorin I
chr11	11254610	11254981	372	*	Peak_14353	31	.	Distal Intergenic	11	11351942	11353357	1416	2	283106	ENST00000528848.2	98376	ENSG00000254598	CSNK2A3	casein kinase 2 alpha 3
chr22	50727736	50728037	302	*	Peak_14372	31	.	Intron (ENST00000414786.6/85358, intron 22 of 22)	22	50735825	50738139	2315	2	105373100	ENST00000449652.1	10102	ENSG00000225929	LOC105373100	uncharacterized LOC105373100
chr11	92924842	92925710	869	*	Peak_14470	31	.	Intron (ENST00000634657.1/ENST00000634657.1, intron 1 of 1)	11	92914272	92915604	1333	2	105369431	ENST00000635432.1	-9238	NA	LOC105369431	uncharacterized LOC105369431
chr8	96131192	96131434	243	*	Peak_14589	31	.	Distal Intergenic	8	96144525	96160716	16192	2	392255	ENST00000621429.1	29282	ENSG00000156466	GDF6	growth differentiation factor 6
chr9	36837770	36838364	595	*	Peak_14592	31	.	3' UTR	9	36823539	36823599	61	2	100616289	ENST00000580479.1	-14171	ENSG00000266255	MIR4475	microRNA 4475
chr22	38996461	38996710	250	*	Peak_14543	31	.	Promoter (1-2kb)	22	38991559	38998209	6651	2	100874530	ENST00000513758.2	1499	ENSG00000249310	APOBEC3B-AS1	APOBEC3B antisense RNA 1
chr4	56288642	56288959	318	*	Peak_14559	31	.	Intron (ENST00000629263.2/57482, intron 3 of 4)	4	56272404	56328092	55689	1	57482	ENST00000541073.5	16238	ENSG00000109265	KIAA1211	KIAA1211
chr8	122804705	122805067	363	*	Peak_14582	31	.	Intron (ENST00000314393.5/22882, intron 1 of 3)	8	122781394	122974512	193119	1	22882	ENST00000314393.5	23311	ENSG00000178764	ZHX2	zinc fingers and homeoboxes 2
chr1	1050406	1050821	416	*	Peak_14603	31	.	Promoter (<=1kb)	1	1050508	1053950	3443	1	375790	ENST00000419249.2	0	ENSG00000188157	AGRN	agrin
chr9	32784999	32785348	350	*	Peak_14755	31	.	Promoter (1-2kb)	9	32783499	32787399	3901	1	401498	ENST00000342743.5	1500	ENSG00000188133	TMEM215	transmembrane protein 215
chr11	76717296	76717641	346	*	Peak_14856	31	.	Promoter (2-3kb)	11	76694041	76719801	25761	2	390226	ENST00000531117.2	2160	NA	GUCY2EP	guanylate cyclase 2E, pseudogene
chr2	179778030	179778298	269	*	Peak_14905	30	.	Intron (ENST00000410066.6/151126, intron 1 of 9)	2	179443250	179769755	326506	2	151126	ENST00000644742.1	-8275	ENSG00000144331	ZNF385B	zinc finger protein 385B
chr5	33719950	33720236	287	*	Peak_14973	30	.	Intron (ENST00000504830.5/81792, intron 3 of 23)	5	33603442	33624351	20910	2	81792	ENST00000506952.1	-95599	ENSG00000151388	ADAMTS12	ADAM metallopeptidase with thrombospondin type 1 motif 12
chr20	33680014	33680419	406	*	Peak_15029	30	.	Exon (ENST00000343380.5/1869, exon 2 of 7)	20	33657087	33674463	17377	2	63941	ENST00000375238.8	-5551	ENSG00000125967	NECAB3	N-terminal EF-hand calcium binding protein 3
chr19	46003090	46003713	624	*	Peak_15035	30	.	Promoter (<=1kb)	19	46003006	46018392	15387	1	729440	ENST00000594087.1	84	ENSG00000104983	CCDC61	coiled-coil domain containing 61
chr7	98194458	98194725	268	*	Peak_15209	30	.	Exon (ENST00000297293.5/22853, exon 11 of 14)	7	98212254	98212959	706	1	168620	ENST00000314018.2	-17529	ENSG00000180535	BHLHA15	basic helix-loop-helix family member a15
chr21	42853777	42854016	240	*	Peak_15391	30	.	Intron (ENST00000330317.6/10785, intron 8 of 11)	21	42849226	42879275	30050	2	10785	ENST00000492742.5	25259	ENSG00000160193	WDR4	WD repeat domain 4
chr8	131096218	131096460	243	*	Peak_15528	30	.	Distal Intergenic	8	130780301	131042426	262126	2	114	ENST00000286355.9	-53792	ENSG00000155897	ADCY8	adenylate cyclase 8
chr9	131787407	131787693	287	*	Peak_15580	30	.	Distal Intergenic	9	131576770	131740074	163305	2	2889	ENST00000372195.5	-47333	ENSG00000107263	RAPGEF1	Rap guanine nucleotide exchange factor 1
chr2	96685894	96686220	327	*	Peak_15635	30	.	Exon (ENST00000436930.6/90342, exon 21 of 52)	2	96670218	96704885	34668	1	90342	ENST00000457909.2	15676	ENSG00000249715	FER1L5	fer-1 like family member 5
chr15	67421752	67422033	282	*	Peak_15704	30	.	Intron (ENST00000514049.5/64799, intron 13 of 16)	15	67408077	67413538	5462	2	100506686	ENST00000558025.1	-8214	ENSG00000259673	IQCH-AS1	IQCH antisense RNA 1
chr20	23048117	23048415	299	*	Peak_17027	28	.	Promoter (1-2kb)	20	23045633	23049741	4109	2	7056	ENST00000377103.2	1326	ENSG00000178726	THBD	thrombomodulin
chr1	10519586	10519858	273	*	Peak_17063	28	.	Intron (ENST00000472851.1/5195, intron 3 of 3)	1	10535888	10536289	402	1	5195	ENST00000492696.1	-16030	ENSG00000142655	PEX14	peroxisomal biogenesis factor 14
chr5	169562821	169563137	317	*	Peak_17171	28	.	Distal Intergenic	5	169583634	169604778	21145	1	54908	ENST00000265295.8	-20497	ENSG00000040275	SPDL1	spindle apparatus coiled-coil protein 1
chr6	52914660	52914889	230	*	Peak_17186	28	.	Distal Intergenic	6	52896639	52909685	13047	2	2940	ENST00000211122.3	-4975	ENSG00000174156	GSTA3	glutathione S-transferase alpha 3
chr19	38425401	38425909	509	*	Peak_17121	28	.	Promoter (<=1kb)	19	38409840	38426162	16323	2	115727	ENST00000587738.2	253	ENSG00000171777	RASGRP4	RAS guanyl releasing protein 4
chr19	2746247	2746706	460	*	Peak_17118	28	.	Distal Intergenic	19	2732524	2740152	7629	2	29985	ENST00000269740.8	-6095	ENSG00000141873	SLC39A3	solute carrier family 39 member 3
chr11	13889306	13889649	344	*	Peak_17220	28	.	Distal Intergenic	11	13844862	13870616	25755	2	105376561	ENST00000525381.1	-18690	ENSG00000254930	LINC02545	long intergenic non-protein coding RNA 2545
chr2	10032845	10033103	259	*	Peak_17297	28	.	Distal Intergenic	2	10042849	10047770	4922	1	8462	ENST00000401510.5	-9746	ENSG00000172059	KLF11	Kruppel like factor 11
chr20	61305302	61305758	457	*	Peak_17999	26	.	Intron (ENST00000614565.4/1002, intron 2 of 15)	20	61252426	61940617	688192	1	1002	ENST00000614565.4	52876	ENSG00000179242	CDH4	cadherin 4
chr11	25782823	25783098	276	*	Peak_17870	26	.	Distal Intergenic	11	26189123	26208347	19225	1	63982	ENST00000531798.1	-406025	ENSG00000134343	ANO3	anoctamin 3
chr6	10136744	10136973	230	*	Peak_18091	26	.	Intron (ENST00000481704.1/ENST00000481704.1, intron 2 of 2)	6	10404502	10407928	3427	1	109729173	ENST00000645232.1	-267529	ENSG00000285278	TFAP2A-AS2	TFAP2A antisense RNA 2
chr11	95523014	95523253	240	*	Peak_17890	26	.	Distal Intergenic	11	95775854	95779204	3351	2	143684	ENST00000541418.1	255951	ENSG00000077458	FAM76B	family with sequence similarity 76 member B
chr15	88978405	88978707	303	*	Peak_17927	26	.	Distal Intergenic	15	88898714	88913411	14698	2	4240	ENST00000268150.12	-64994	ENSG00000140545	MFGE8	milk fat globule-EGF factor 8 protein
chr3	11077787	11078068	282	*	Peak_18027	26	.	Distal Intergenic	3	11032191	11039169	6979	1	6529	ENST00000495636.2	45596	ENSG00000157103	SLC6A1	solute carrier family 6 member 1
chr5	147184161	147184458	298	*	Peak_18069	26	.	Intron (ENST00000504297.1/105378217, intron 2 of 2)	5	147180204	147234859	54656	2	105378217	ENST00000504297.1	50401	NA	STK32A-AS1	STK32A antisense RNA 1
chr5	53617295	53617524	230	*	Peak_18080	26	.	Intron (ENST00000507026.5/4724, intron 3 of 5)	5	53646195	53658789	12595	1	4724	ENST00000509443.1	-28671	ENSG00000164258	NDUFS4	NADH:ubiquinone oxidoreductase subunit S4
chr4	7188298	7188648	351	*	Peak_18060	26	.	Distal Intergenic	4	7192538	7742827	550290	1	57537	ENST00000507866.6	-3890	ENSG00000184985	SORCS2	sortilin related VPS10 domain containing receptor 2
chr3	71864613	71864869	257	*	Peak_18053	26	.	Distal Intergenic	3	71771656	71785206	13551	2	60675	ENST00000353065.7	-79407	ENSG00000163421	PROK2	prokineticin 2
chr17	43375678	43375983	306	*	Peak_18614	25	.	Exon (ENST00000592135.5/100130581, exon 4 of 4)	17	43375928	43388312	12385	2	100130581	ENST00000592135.5	12329	ENSG00000188825	LINC00910	long intergenic non-protein coding RNA 910
chr11	70883777	70884016	240	*	Peak_19520	24	.	Intron (ENST00000601538.5/22941, intron 10 of 24)	11	70807049	70873122	66074	2	22941	ENST00000425049.1	-10655	ENSG00000162105	SHANK2	SH3 and multiple ankyrin repeat domains 2
chr8	81243370	81244074	705	*	Peak_19732	24	.	Distal Intergenic	8	81280363	81284777	4415	1	2171	ENST00000297258.10	-36289	ENSG00000164687	FABP5	fatty acid binding protein 5

## Sheet: UV_filter.PeakAnno
seqnames	start	end	width	strand	V4	V5	V6	annotation	geneChr	geneStart	geneEnd	geneLength	geneStrand	geneId	transcriptId	distanceToTSS	ENSEMBL	SYMBOL	GENENAME
chr11	497800	500160	2361	*	Peak_1	1000	.	Promoter (<=1kb)	11	494544	498929	4386	2	6050	ENST00000529768.5	0	ENSG00000023191	RNH1	ribonuclease/angiogenin inhibitor 1
chr11	500329	500813	485	*	Peak_2	1000	.	Promoter (1-2kb)	11	494544	498929	4386	2	6050	ENST00000529768.5	-1400	ENSG00000023191	RNH1	ribonuclease/angiogenin inhibitor 1
chr11	494431	495220	790	*	Peak_3	1000	.	3' UTR	11	494544	498929	4386	2	6050	ENST00000529768.5	3709	ENSG00000023191	RNH1	ribonuclease/angiogenin inhibitor 1
chr14	20801484	20802113	630	*	Peak_4	1000	.	Promoter (<=1kb)	14	20801356	20802406	1051	2	6035	ENST00000412779.2	293	ENSG00000129538	RNASE1	ribonuclease A family member 1, pancreatic
chr20	49277707	49293634	15928	*	Peak_5	1000	.	Promoter (<=1kb)	20	49280319	49280409	91	1	100113393	ENST00000410433.1	0	ENSG00000222365	SNORD12B	small nucleolar RNA, C/D box 12B
chr11	501905	502322	418	*	Peak_8	1000	.	Promoter (<=1kb)	11	499677	502215	2539	2	6050	ENST00000531223.1	0	ENSG00000023191	RNH1	ribonuclease/angiogenin inhibitor 1
chr5	177389869	177392205	2337	*	Peak_11	1000	.	Promoter (<=1kb)	5	177389647	177398840	9194	1	6569	ENST00000513614.1	222	ENSG00000131183	SLC34A1	solute carrier family 34 member 1
chr16	70700559	70704345	3787	*	Peak_18	1000	.	Promoter (<=1kb)	16	70687442	70700245	12804	2	55697	ENST00000536184.6	-314	ENSG00000103043	VAC14	VAC14 component of PIKFYVE complex
chr17	44590735	44593528	2794	*	Peak_22	1000	.	Distal Intergenic	17	44557459	44559570	2112	1	2535	ENST00000315323.4	33276	ENSG00000180340	FZD2	frizzled class receptor 2
chr17	38873667	38875679	2013	*	Peak_42	1000	.	Promoter (<=1kb)	17	38873890	38915141	41252	1	3927	ENST00000419929.1	0	ENSG00000002834	LASP1	LIM and SH3 protein 1
chr11	10943068	10945205	2138	*	Peak_52	1000	.	Distal Intergenic	11	10865261	10906802	41542	1	729013	ENST00000530344.1	77807	ENSG00000247271	ZBED5-AS1	ZBED5 antisense RNA 1
chr3	10971575	10974662	3088	*	Peak_65	1000	.	Distal Intergenic	3	10992186	11039174	46989	1	6529	ENST00000646702.1	-17524	ENSG00000157103	SLC6A1	solute carrier family 6 member 1
chr11	64697233	64699336	2104	*	Peak_67	1000	.	Exon (ENST00000377551.5/9379, exon 2 of 22)	11	64667438	64712745	45308	2	9379	ENST00000442300.5	13409	ENSG00000110076	NRXN2	neurexin 2
chr1	28897663	28899752	2090	*	Peak_89	1000	.	Intron (ENST00000642260.1/2035, intron 1 of 20)	1	28893741	29120046	226306	1	2035	ENST00000373798.5	3922	ENSG00000159023	EPB41	erythrocyte membrane protein band 4.1
chr17	57487201	57489522	2322	*	Peak_97	1000	.	Intron (ENST00000416426.6/124540, intron 6 of 13)	17	57522248	57523597	1350	2	101927557	ENST00000577189.1	34075	ENSG00000266100	LOC101927557	uncharacterized LOC101927557
chr1	103280779	103282710	1932	*	Peak_120	1000	.	Distal Intergenic	1	103001079	103108872	107794	2	1301	ENST00000645458.1	-171907	ENSG00000060718	COL11A1	collagen type XI alpha 1 chain
chr1	95016593	95018793	2201	*	Peak_121	1000	.	Intron (ENST00000370205.5/199857, intron 3 of 3)	1	94983550	95027203	43654	2	199857	ENST00000507727.2	8410	ENSG00000172339	ALG14	ALG14 UDP-N-acetylglucosaminyltransferase subunit
chr11	15326716	15329282	2567	*	Peak_142	1000	.	Distal Intergenic	11	15235145	15246318	11174	1	387755	ENST00000526102.1	91571	ENSG00000188487	INSC	INSC spindle orientation adaptor protein
chr13	44476424	44477563	1140	*	Peak_145	1000	.	Promoter (2-3kb)	13	44432143	44474301	42159	2	8848	ENST00000611198.4	-2123	ENSG00000102804	TSC22D1	TSC22 domain family member 1
chr21	35746561	35748894	2334	*	Peak_161	1000	.	Intron (ENST00000475045.6/101928269, intron 6 of 12)	21	35720715	35720808	94	1	768219	ENST00000390235.1	25846	ENSG00000211590	MIR802	microRNA 802
chr16	56323048	56325481	2434	*	Peak_165	1000	.	Intron (ENST00000262493.11/2775, intron 3 of 8)	16	56328661	56356347	27687	1	2775	ENST00000562316.6	-3180	ENSG00000087258	GNAO1	G protein subunit alpha o1
chr6	3998763	4000418	1656	*	Peak_204	1000	.	Distal Intergenic	6	4021267	4064982	43716	1	8899	ENST00000480058.5	-20849	ENSG00000112739	PRPF4B	pre-mRNA processing factor 4B
chr2	218082950	218085367	2418	*	Peak_208	1000	.	3' UTR	2	218072871	218075720	2850	1	285180	ENST00000463872.1	10079	ENSG00000188282	RUFY4	RUN and FYVE domain containing 4
chr3	44239510	44242282	2773	*	Peak_223	1000	.	Promoter (<=1kb)	3	44241886	44332098	90213	1	375337	ENST00000309765.4	0	ENSG00000173769	TOPAZ1	testis and ovary specific PAZ domain containing 1
chr20	16859917	16861975	2059	*	Peak_229	1000	.	Intron (ENST00000422574.1/ENST00000422574.1, intron 1 of 2)	20	16749360	16751782	2423	1	56914	ENST00000486129.1	110557	ENSG00000125879	OTOR	otoraplin
chr2	214674028	214677009	2982	*	Peak_241	1000	.	Intron (ENST00000412896.5/ENST00000412896.5, intron 2 of 3)	2	214728538	214730508	1971	2	580	ENST00000432456.5	53499	ENSG00000138376	BARD1	BRCA1 associated RING domain 1
chr22	38272749	38274239	1491	*	Peak_246	1000	.	Promoter (<=1kb)	22	38219291	38273034	53744	2	25829	ENST00000361906.7	0	ENSG00000198792	TMEM184B	transmembrane protein 184B
chr8	115209360	115211379	2020	*	Peak_252	1000	.	Distal Intergenic	8	115414429	115492221	77793	2	7227	ENST00000518018.1	280842	ENSG00000104447	TRPS1	transcriptional repressor GATA binding 1
chr20	33354014	33356397	2384	*	Peak_266	1000	.	Exon (ENST00000246222.3/ENST00000246222.3, exon 5 of 6)	20	33358841	33373359	14519	2	51654	ENST00000461710.5	16962	ENSG00000101391	CDK5RAP1	CDK5 regulatory subunit associated protein 1
chr5	525549	527999	2451	*	Peak_295	1000	.	Promoter (1-2kb)	5	473310	524332	51023	2	6550	ENST00000264938.7	-1217	ENSG00000066230	SLC9A3	solute carrier family 9 member A3
chr11	44902342	44904488	2147	*	Peak_300	1000	.	Promoter (1-2kb)	11	44906407	44931336	24930	1	90139	ENST00000518429.2	-1919	ENSG00000157570	TSPAN18	tetraspanin 18
chr6	31577071	31577594	524	*	Peak_306	1000	.	Promoter (1-2kb)	6	31575567	31578336	2770	1	7124	ENST00000449264.2	1504	ENSG00000232810	TNF	tumor necrosis factor
chr19	4034163	4035914	1752	*	Peak_313	1000	.	Intron (ENST00000262971.2/51588, intron 9 of 10)	19	4028461	4028814	354	1	51588	ENST00000601439.1	5702	ENSG00000105229	PIAS4	protein inhibitor of activated STAT 4
chr4	3509817	3511263	1447	*	Peak_323	1000	.	3' UTR	4	3512933	3532149	19217	2	4043	ENST00000296325.9	20886	ENSG00000163956	LRPAP1	LDL receptor related protein associated protein 1
chrX	833405	834955	1551	*	Peak_332	1000	.	Distal Intergenic	23	630807	659411	28605	1	6473	ENST00000381575.6	202598	ENSG00000185960	SHOX	short stature homeobox
chr20	32628221	32630240	2020	*	Peak_345	1000	.	Downstream (1-2kb)	20	32650390	32651759	1370	2	284805	ENST00000360785.5	21519	ENSG00000198547	C20orf203	chromosome 20 open reading frame 203
chr15	90219475	90220903	1429	*	Peak_349	1000	.	Promoter (<=1kb)	15	90219208	90229679	10472	1	10509	ENST00000558065.1	267	ENSG00000185033	SEMA4B	semaphorin 4B
chr3	82536394	82537768	1375	*	Peak_370	1000	.	Distal Intergenic	3	81986152	82202454	216303	1	105377180	ENST00000494340.1	550242	ENSG00000239440	LINC02008	long intergenic non-protein coding RNA 2008
chr11	14952333	14954518	2186	*	Peak_374	1000	.	Intron (ENST00000523376.5/797, intron 5 of 9)	11	14966671	14970016	3346	2	796	ENST00000494746.1	15498	ENSG00000110680	CALCA	calcitonin related polypeptide alpha
chr2	101218075	101219791	1717	*	Peak_386	1000	.	Intron (ENST00000463469.5/11138, intron 1 of 4)	2	101252802	101270316	17515	1	55571	ENST00000289382.7	-33011	ENSG00000158435	CNOT11	CCR4-NOT transcription complex subunit 11
chr10	47408329	47410161	1833	*	Peak_389	1000	.	Distal Intergenic	10	47365496	47384273	18778	2	118738	ENST00000585316.2	-24056	ENSG00000265763	ZNF488	zinc finger protein 488
chr19	46885097	46886807	1711	*	Peak_397	1000	.	Distal Intergenic	19	46918676	47004307	85632	1	2909	ENST00000614079.1	-31869	ENSG00000160007	ARHGAP35	Rho GTPase activating protein 35
chr14	105476576	105480231	3656	*	Peak_438	1000	.	Promoter (<=1kb)	14	105476764	105480124	3361	1	1397	ENST00000548309.1	0	ENSG00000182809	CRIP2	cysteine rich protein 2
chr6	43261170	43264009	2840	*	Peak_448	1000	.	Exon (ENST00000259750.8/84630, exon 13 of 15)	6	43247989	43272626	24638	1	84630	ENST00000304139.6	13181	ENSG00000146216	TTBK1	tau tubulin kinase 1
chr11	20954161	20955734	1574	*	Peak_473	1000	.	Intron (ENST00000325319.9/4745, intron 10 of 18)	11	20935696	21229388	293693	1	4745	ENST00000530672.1	18465	ENSG00000165973	NELL1	neural EGFL like 1
chr3	153421421	153423354	1934	*	Peak_483	1000	.	Intron (ENST00000493214.2/105374165, intron 5 of 6)	3	153440859	153502693	61835	1	152118	ENST00000648073.1	-17505	ENSG00000237787	C3orf79	chromosome 3 open reading frame 79
chrX	1597217	1600080	2864	*	Peak_489	1000	.	3' UTR	23	1591625	1600303	8679	1	8227	ENST00000381261.8	5592	ENSG00000197976	AKAP17A	A-kinase anchoring protein 17A
chr11	12072856	12074213	1358	*	Peak_518	1000	.	Exon (ENST00000476130.2/ENST00000476130.2, exon 2 of 2)	11	12094008	12204280	110273	1	9645	ENST00000532179.5	-19795	ENSG00000133816	MICAL2	microtubule associated monooxygenase, calponin and LIM domain containing 2
chr10	124124026	124126004	1979	*	Peak_529	1000	.	Distal Intergenic	10	124007666	124093607	85942	2	51363	ENST00000435907.5	-30419	ENSG00000182022	CHST15	carbohydrate sulfotransferase 15
chr20	36497435	36499284	1850	*	Peak_538	1000	.	Promoter (<=1kb)	20	36497817	36527231	29415	1	22839	ENST00000478910.5	0	ENSG00000080845	DLGAP4	DLG associated protein 4
chr2	106913258	106915653	2396	*	Peak_549	1000	.	Distal Intergenic	2	106813076	106887108	74033	2	84620	ENST00000409087.3	-26150	ENSG00000144057	ST6GAL2	ST6 beta-galactoside alpha-2,6-sialyltransferase 2
chr9	37484617	37485841	1225	*	Peak_555	1000	.	Promoter (<=1kb)	9	37485935	37503697	17763	1	64425	ENST00000377798.8	-94	ENSG00000137054	POLR1E	RNA polymerase I subunit E
chr13	33060251	33062714	2464	*	Peak_603	1000	.	Exon (ENST00000487852.1/9365, exon 4 of 5)	13	33016433	33066145	49713	1	9365	ENST00000380099.3	43818	ENSG00000133116	KL	klotho
chr17	29083068	29085831	2764	*	Peak_697	1000	.	Promoter (<=1kb)	17	29074748	29082438	7691	2	399687	ENST00000636100.1	-630	ENSG00000196535	MYO18A	myosin XVIIIA
chr11	78230680	78233009	2330	*	Peak_795	952	.	Promoter (<=1kb)	11	78226620	78231932	5313	2	9846	ENST00000528329.1	0	ENSG00000033327	GAB2	GRB2 associated binding protein 2
chr17	73952731	73955297	2567	*	Peak_881	906	.	Distal Intergenic	17	73750330	73828520	78191	2	283982	ENST00000544677.1	-124211	NA	LINC00469	long intergenic non-protein coding RNA 469
chr15	82079567	82081935	2369	*	Peak_899	897	.	Distal Intergenic	15	82088594	82097694	9101	1	101929690	ENST00000558082.1	-6659	ENSG00000259518	LINC01583	long intergenic non-protein coding RNA 1583
chr4	4866975	4868545	1571	*	Peak_914	890	.	Distal Intergenic	4	4862428	4863028	601	1	4487	ENST00000468421.1	4547	ENSG00000163132	MSX1	msh homeobox 1
chr21	45590199	45592427	2229	*	Peak_950	873	.	Promoter (1-2kb)	21	45593654	45603056	9403	1	105372840	ENST00000441095.2	-1227	ENSG00000233922	LINC01694	long intergenic non-protein coding RNA 1694
chr2	119543998	119544998	1001	*	Peak_952	871	.	Promoter (<=1kb)	2	119544432	119656661	112230	1	200373	ENST00000295220.10	0	ENSG00000163075	CFAP221	cilia and flagella associated protein 221
chr5	79850423	79851789	1367	*	Peak_1000	848	.	Distal Intergenic	5	79936579	79967626	31048	1	105616916	ENST00000503167.1	-84790	ENSG00000250888	LINC01455	long intergenic non-protein coding RNA 1455
chr3	14254141	14256952	2812	*	Peak_1023	840	.	Distal Intergenic	3	14145147	14178783	33637	2	7508	ENST00000285021.11	-75358	ENSG00000154767	XPC	XPC complex subunit, DNA damage recognition and repair factor
chr9	1416540	1418602	2063	*	Peak_1029	837	.	Distal Intergenic	9	1054624	1057551	2928	1	10655	ENST00000634824.1	361916	ENSG00000173253	DMRT2	doublesex and mab-3 related transcription factor 2
chr1	110276584	110277664	1081	*	Peak_1087	820	.	Intron (ENST00000412512.2/3749, intron 1 of 2)	1	110223830	110229151	5322	1	3749	ENST00000636402.1	52754	ENSG00000116396	KCNC4	potassium voltage-gated channel subfamily C member 4
chr1	22978389	22979398	1010	*	Peak_1179	782	.	Distal Intergenic	1	22953043	22965338	12296	2	646262	ENST00000426928.6	-13051	ENSG00000215906	LACTBL1	lactamase beta like 1
chr8	101484245	101485814	1570	*	Peak_1184	782	.	Intron (ENST00000520268.1/ENST00000520268.1, intron 1 of 1)	8	101492432	101669726	177295	1	79977	ENST00000251808.7	-6618	ENSG00000083307	GRHL2	grainyhead like transcription factor 2
chr9	127412385	127414111	1727	*	Peak_1193	777	.	Distal Intergenic	9	127404049	127405447	1399	1	29988	ENST00000485806.1	8336	ENSG00000136856	SLC2A8	solute carrier family 2 member 8
chr7	891832	893208	1377	*	Peak_1295	744	.	Promoter (<=1kb)	7	892300	895658	3359	1	51608	ENST00000464468.1	0	ENSG00000239857	GET4	golgi to ER traffic protein 4
chr2	6768618	6770654	2037	*	Peak_1418	714	.	Promoter (<=1kb)	2	6729168	6770311	41144	2	400941	ENST00000382045.3	0	ENSG00000205837	LINC00487	long intergenic non-protein coding RNA 487
chr22	20122152	20125529	3378	*	Peak_1752	634	.	Promoter (<=1kb)	22	20122607	20127353	4747	1	5902	ENST00000448394.2	0	ENSG00000099901	RANBP1	RAN binding protein 1
chr17	7358699	7359896	1198	*	Peak_1784	628	.	Distal Intergenic	17	7355178	7357219	2042	1	339168	ENST00000330767.4	3521	ENSG00000182896	TMEM95	transmembrane protein 95
chr1	232562634	232566045	3412	*	Peak_1852	613	.	Promoter (1-2kb)	1	232397965	232561558	163594	2	57568	ENST00000366630.5	-1076	ENSG00000116991	SIPA1L2	signal induced proliferation associated 1 like 2
chr11	96234770	96236511	1742	*	Peak_1918	600	.	Intron (ENST00000524717.5/84441, intron 1 of 4)	11	96341438	96341526	89	1	100422991	ENST00000582890.3	-104927	ENSG00000266192	MIR1260B	microRNA 1260b
chr5	616498	617787	1290	*	Peak_2126	566	.	Intron (ENST00000264935.5/55722, intron 1 of 11)	5	612272	653553	41282	1	55722	ENST00000264935.5	4226	ENSG00000112877	CEP72	centrosomal protein 72
chr5	169280463	169281497	1035	*	Peak_2163	562	.	Intron (ENST00000519560.5/6586, intron 1 of 35)	5	169263601	169263694	94	2	693170	ENST00000384887.1	-16769	ENSG00000207619	MIR585	microRNA 585
chr7	1571811	1573524	1714	*	Peak_2335	538	.	Promoter (<=1kb)	7	1567613	1571005	3393	2	84262	ENST00000252329.3	-806	ENSG00000157778	PSMG3	proteasome assembly chaperone 3
chr3	16175106	16176697	1592	*	Peak_2480	519	.	Promoter (<=1kb)	3	16175417	16183253	7837	1	117248	ENST00000470031.1	0	ENSG00000131386	GALNT15	polypeptide N-acetylgalactosaminyltransferase 15
chr7	157817634	157821115	3482	*	Peak_2483	518	.	Intron (ENST00000389413.7/5799, intron 11 of 21)	7	157854529	157857852	3324	1	100506585	ENST00000436151.5	-33414	NA	LOC100506585	uncharacterized LOC100506585
chr9	70117395	70118859	1465	*	Peak_2630	498	.	Intron (ENST00000377182.4/256691, intron 5 of 13)	9	70153134	70157540	4407	2	100507244	ENST00000451488.1	38681	ENSG00000204706	MAMDC2-AS1	MAMDC2 antisense RNA 1
chr16	49455615	49456257	643	*	Peak_2658	494	.	Intron (ENST00000573819.1/ENST00000573819.1, intron 1 of 1)	16	49517762	49518601	840	2	1596	ENST00000569937.2	62344	ENSG00000260089	ADAM3B	ADAM metallopeptidase domain 3B (pseudogene)
chr17	49880192	49881842	1651	*	Peak_2689	492	.	Distal Intergenic	17	49844057	49848017	3961	2	255061	ENST00000608380.1	-32175	ENSG00000176358	TAC4	tachykinin 4
chr3	18843559	18844315	757	*	Peak_2692	492	.	Intron (ENST00000626982.2/101927777, intron 4 of 4)	3	19148454	19535646	387193	1	131096	ENST00000328405.6	-304139	ENSG00000183960	KCNH8	potassium voltage-gated channel subfamily H member 8
chr10	52220275	52221144	870	*	Peak_2793	480	.	Intron (ENST00000401604.7/5592, intron 9 of 17)	10	52230742	52301302	70561	2	100506939	ENST00000452247.6	80158	NA	PRKG1-AS1	PRKG1 antisense RNA 1
chr20	36394884	36397628	2745	*	Peak_2831	474	.	Intron (ENST00000373913.7/22839, intron 2 of 12)	20	36367149	36527190	160042	1	22839	ENST00000373907.6	27735	ENSG00000080845	DLGAP4	DLG associated protein 4
chr16	58160251	58162224	1974	*	Peak_2848	471	.	3' UTR	16	58159551	58167713	8163	2	1459	ENST00000563307.1	5489	ENSG00000070770	CSNK2A2	casein kinase 2 alpha 2
chr12	129632474	129634518	2045	*	Peak_2871	469	.	Intron (ENST00000422113.6/121256, intron 2 of 8)	12	129071726	129903666	831941	2	121256	ENST00000422113.6	269148	ENSG00000151952	TMEM132D	transmembrane protein 132D
chr3	151031816	151032643	828	*	Peak_2904	468	.	Intron (ENST00000476886.5/116933, intron 1 of 4)	3	151085697	151122931	37235	1	116931	ENST00000469768.1	-53054	ENSG00000144893	MED12L	mediator complex subunit 12L
chr12	110408004	110409510	1507	*	Peak_3433	419	.	Intron (ENST00000550231.1/51434, intron 1 of 4)	12	110375477	110403730	28254	2	51434	ENST00000450008.2	-4274	ENSG00000196510	ANAPC7	anaphase promoting complex subunit 7
chr14	73248185	73249158	974	*	Peak_3493	416	.	Promoter (<=1kb)	14	73249776	73251018	1243	1	89932	ENST00000555035.1	-618	ENSG00000100767	PAPLN	papilin, proteoglycan like sulfated glycoprotein
chr9	129407247	129408298	1052	*	Peak_3513	414	.	Distal Intergenic	9	129341843	129359538	17696	1	100506119	ENST00000423122.1	65404	ENSG00000233901	LINC01503	long intergenic non-protein coding RNA 1503
chr11	69887130	69888325	1196	*	Peak_3508	414	.	Distal Intergenic	11	69809969	69819024	9056	2	2248	ENST00000334134.3	-68106	ENSG00000186895	FGF3	fibroblast growth factor 3
chr1	234576948	234578540	1593	*	Peak_3594	407	.	Distal Intergenic	1	234607231	234608094	864	2	359948	ENST00000491430.1	29554	ENSG00000168264	IRF2BP2	interferon regulatory factor 2 binding protein 2
chr1	226976637	226978531	1895	*	Peak_3676	402	.	Promoter (<=1kb)	1	226977404	226987544	10141	1	56997	ENST00000485462.5	0	ENSG00000163050	COQ8A	coenzyme Q8A
chr17	50165543	50167868	2326	*	Peak_3683	401	.	Promoter (<=1kb)	17	50165985	50168570	2586	1	6442	ENST00000514934.1	0	ENSG00000108823	SGCA	sarcoglycan alpha
chr5	100176204	100178035	1832	*	Peak_4119	370	.	Distal Intergenic	5	100375700	100381398	5699	2	100133050	ENST00000621479.1	203363	NA	LOC100133050	glucuronidase beta pseudogene
chr11	75351919	75352780	862	*	Peak_4216	364	.	Promoter (<=1kb)	11	75265599	75351705	86107	2	408	ENST00000360025.7	-214	ENSG00000137486	ARRB1	arrestin beta 1
chr13	35908843	35910252	1410	*	Peak_4227	362	.	Intron (ENST00000360631.7/9201, intron 4 of 16)	13	35768652	35855861	87210	2	9201	ENST00000615680.4	-52982	ENSG00000133083	DCLK1	doublecortin like kinase 1
chr10	68180101	68181193	1093	*	Peak_4226	362	.	Intron (ENST00000540630.5/84665, intron 13 of 20)	10	68230624	68232103	1480	2	220202	ENST00000373673.4	50910	ENSG00000179774	ATOH7	atonal bHLH transcription factor 7
chr3	196694915	196696017	1103	*	Peak_4299	358	.	Intron (ENST00000426755.5/54965, intron 2 of 5)	3	196707061	196712248	5188	2	84984	ENST00000399942.4	16231	ENSG00000174007	CEP19	centrosomal protein 19
chr3	170533585	170534258	674	*	Peak_4345	355	.	Intron (ENST00000486975.1/5010, intron 2 of 3)	3	170570090	170586027	15938	2	57709	ENST00000466168.1	51769	ENSG00000013293	SLC7A14	solute carrier family 7 member 14
chr1	226118366	226119156	791	*	Peak_4357	354	.	Distal Intergenic	1	226148003	226155071	7069	1	107985353	ENST00000440540.1	-28847	ENSG00000234478	ACBD3-AS1	ACBD3 antisense RNA 1
chr20	11195443	11196272	830	*	Peak_4394	353	.	Distal Intergenic	20	11234170	11301525	67356	2	339593	ENST00000444792.1	105253	NA	LOC339593	uncharacterized LOC339593
chr16	67731091	67731938	848	*	Peak_4420	352	.	3' UTR	16	67674533	67719421	44889	2	81577	ENST00000268797.11	-11670	ENSG00000141098	GFOD2	glucose-fructose oxidoreductase domain containing 2
chr11	44861031	44862074	1044	*	Peak_4535	346	.	Promoter (1-2kb)	11	44859603	44909839	50237	1	90139	ENST00000520837.5	1428	ENSG00000157570	TSPAN18	tetraspanin 18
chr16	619251	619996	746	*	Peak_4538	346	.	Promoter (2-3kb)	16	616645	626117	9473	1	57799	ENST00000564703.1	2606	ENSG00000197562	RAB40C	RAB40C, member RAS oncogene family
chr12	58369287	58370621	1335	*	Peak_4645	340	.	Distal Intergenic	12	58544124	58813060	268937	1	100506869	ENST00000546977.5	-173503	ENSG00000258231	LOC100506869	uncharacterized LOC100506869
chr18	48455475	48456673	1199	*	Peak_4766	333	.	Distal Intergenic	18	48041052	48410752	369701	2	201501	ENST00000588149.5	-44723	ENSG00000184828	ZBTB7C	zinc finger and BTB domain containing 7C
chr19	40758053	40759963	1911	*	Peak_4779	333	.	Promoter (1-2kb)	19	40757036	40759640	2605	1	6626	ENST00000598452.1	1017	ENSG00000077312	SNRPA	small nuclear ribonucleoprotein polypeptide A
chr13	44272994	44274277	1284	*	Peak_4784	332	.	Distal Intergenic	13	44196129	44196200	72	2	102465876	ENST00000610873.1	-76794	ENSG00000276319	MIR8079	microRNA 8079
chr13	27363175	27363812	638	*	Peak_4865	327	.	Distal Intergenic	13	27424544	27435688	11145	1	2971	ENST00000381140.8	-60732	ENSG00000122034	GTF3A	general transcription factor IIIA
chr1	111891403	111893182	1780	*	Peak_5214	311	.	Intron (ENST00000369697.5/3752, intron 1 of 5)	1	111909336	111910161	826	1	100873995	ENST00000441125.1	-16154	ENSG00000237556	KCND3-AS1	KCND3 antisense RNA 1
chr6	12339243	12340679	1437	*	Peak_5301	308	.	Distal Intergenic	6	12290363	12297194	6832	1	1906	ENST00000379375.5	48880	ENSG00000078401	EDN1	endothelin 1
chr11	28440381	28441138	758	*	Peak_5353	303	.	Intron (ENST00000532947.2/196074, intron 6 of 7)	11	28477481	28477548	68	2	102466876	ENST00000618032.1	36410	ENSG00000273912	MIR8068	microRNA 8068
chr2	98032909	98034034	1126	*	Peak_5366	302	.	Distal Intergenic	2	97756340	97995891	239552	2	23505	ENST00000186436.9	-37018	ENSG00000075568	TMEM131	transmembrane protein 131
chr4	93369117	93370686	1570	*	Peak_5440	301	.	Intron (ENST00000282020.8/2895, intron 8 of 15)	4	93238371	93306322	67952	1	2895	ENST00000513976.1	130746	ENSG00000152208	GRID2	glutamate ionotropic receptor delta type subunit 2
chr5	111525896	111527088	1193	*	Peak_5505	300	.	Intron (ENST00000500779.2/100505678, intron 1 of 6)	5	111500147	111512590	12444	2	134429	ENST00000502322.5	-13306	ENSG00000164211	STARD4	StAR related lipid transfer domain containing 4
chr20	4568664	4569242	579	*	Peak_5587	295	.	Distal Intergenic	20	4686236	4701590	15355	1	5621	ENST00000379440.8	-116994	ENSG00000171867	PRNP	prion protein
chr7	73570209	73571269	1061	*	Peak_5629	292	.	Promoter (<=1kb)	7	73570471	73571394	924	2	26608	ENST00000488915.1	125	ENSG00000106638	TBL2	transducin beta like 2
chr9	136315695	136317041	1347	*	Peak_5901	283	.	Distal Intergenic	9	136322303	136325218	2916	2	26102	ENST00000601276.2	8177	ENSG00000262075	DKFZP434A062	uncharacterized LOC26102
chr1	93629751	93630651	901	*	Peak_5936	281	.	Intron (ENST00000260502.10/8412, intron 3 of 11)	1	93561786	93614097	52312	2	8412	ENST00000370247.7	-15654	ENSG00000137936	BCAR3	BCAR3 adaptor protein, NSP family member
chr8	77329884	77330568	685	*	Peak_6122	277	.	Distal Intergenic	8	77399072	77537290	138219	1	102724874	ENST00000518706.6	-68504	NA	LOC102724874	uncharacterized LOC102724874
chr14	105562510	105564191	1682	*	Peak_6189	273	.	Distal Intergenic	14	105528624	105530202	1579	1	80757	ENST00000431372.1	33886	ENSG00000184986	TMEM121	transmembrane protein 121
chr14	104331447	104332848	1402	*	Peak_6223	271	.	Distal Intergenic	14	104223614	104243747	20134	1	145195	ENST00000555282.1	107833	ENSG00000258913	LINC02691	long intergenic non-protein coding RNA 2691
chr20	57409949	57411369	1421	*	Peak_6225	271	.	Distal Intergenic	20	57384160	57393062	8903	2	100291105	ENST00000417346.1	-16887	ENSG00000218018	LOC100291105	uncharacterized LOC100291105
chr7	104933328	104935331	2004	*	Peak_6263	269	.	Distal Intergenic	7	104894628	104926645	32018	2	723809	ENST00000631061.2	-6683	ENSG00000225329	LHFPL3-AS2	LHFPL3 antisense RNA 2
chr10	132866180	132867636	1457	*	Peak_6317	267	.	Exon (ENST00000368586.9/54777, exon 34 of 58)	10	132872528	132876908	4381	2	54777	ENST00000417862.2	9272	ENSG00000171811	CFAP46	cilia and flagella associated protein 46
chr10	58229091	58229607	517	*	Peak_6320	267	.	Intron (ENST00000373935.3/253430, intron 2 of 5)	10	58191517	58267934	76418	2	253430	ENST00000373935.3	38327	ENSG00000151151	IPMK	inositol polyphosphate multikinase
chr8	142529761	142530496	736	*	Peak_6455	265	.	Intron (ENST00000517894.5/575, intron 24 of 30)	8	142543501	142544684	1184	1	575	ENST00000518812.1	-13005	ENSG00000181790	ADGRB1	adhesion G protein-coupled receptor B1
chr18	12958112	12959312	1201	*	Peak_6626	257	.	Intron (ENST00000262124.15/81929, intron 3 of 8)	18	12948505	12971249	22745	1	81929	ENST00000588251.1	9607	ENSG00000085415	SEH1L	SEH1 like nucleoporin
chr5	139873503	139873983	481	*	Peak_6629	257	.	Promoter (1-2kb)	5	139869399	139871803	2405	2	9542	ENST00000519478.1	-1700	ENSG00000158458	NRG2	neuregulin 2
chr3	56772698	56773587	890	*	Peak_6645	257	.	Promoter (1-2kb)	3	56729021	56775567	46547	2	50650	ENST00000497267.5	1980	ENSG00000163947	ARHGEF3	Rho guanine nucleotide exchange factor 3
chr6	131907308	131907947	640	*	Peak_6734	256	.	Exon (ENST00000421310.5/ENST00000421310.5, exon 3 of 3)	6	131868037	131880287	12251	1	5167	ENST00000647981.1	39271	ENSG00000197594	ENPP1	ectonucleotide pyrophosphatase/phosphodiesterase 1
chr2	138438566	138439014	449	*	Peak_6844	251	.	Intron (ENST00000431985.5/ENST00000431985.5, intron 3 of 3)	2	138501801	138573547	71747	1	339745	ENST00000280098.8	-62787	ENSG00000144228	SPOPL	speckle type BTB/POZ protein like
chr5	173820555	173821844	1290	*	Peak_6849	251	.	Distal Intergenic	5	173789275	173790942	1668	2	101928154	ENST00000522731.1	-29613	NA	LINC01485	long intergenic non-protein coding RNA 1485
chr20	31911979	31913633	1655	*	Peak_6927	248	.	Intron (ENST00000375938.8/164395, intron 6 of 16)	20	31933800	31941231	7432	1	164395	ENST00000619753.1	-20167	ENSG00000131044	TTLL9	tubulin tyrosine ligase like 9
chr10	79291586	79292417	832	*	Peak_6961	248	.	Exon (ENST00000334512.9/57178, exon 11 of 25)	10	79285453	79316528	31076	1	57178	ENST00000446377.3	6133	ENSG00000108175	ZMIZ1	zinc finger MIZ-type containing 1
chr9	31683649	31684305	657	*	Peak_7122	245	.	Distal Intergenic	9	31371611	31381490	9880	2	101929620	ENST00000562065.1	-302159	ENSG00000260720	LINC01243	long intergenic non-protein coding RNA 1243
chr17	19332734	19333268	535	*	Peak_7176	243	.	Intron (ENST00000314728.9/22905, intron 10 of 10)	17	19344506	19344574	69	2	100302256	ENST00000408613.1	11306	ENSG00000221540	MIR1180	microRNA 1180
chr3	17288709	17289159	451	*	Peak_7352	237	.	Intron (ENST00000253692.11/9779, intron 15 of 21)	3	17337389	17372134	34746	2	9779	ENST00000465884.1	82975	ENSG00000131374	TBC1D5	TBC1 domain family member 5
chr11	23883200	23884318	1119	*	Peak_7416	235	.	Distal Intergenic	11	23419105	23419190	86	2	102465860	ENST00000620877.1	-464010	ENSG00000275868	MIR8054	microRNA 8054
chr17	80899863	80900682	820	*	Peak_7681	230	.	Intron (ENST00000577161.5/57521, intron 20 of 21)	17	80922724	80924172	1449	1	57521	ENST00000576366.1	-22042	ENSG00000141564	RPTOR	regulatory associated protein of MTOR complex 1
chr11	125031658	125032536	879	*	Peak_7819	224	.	Intron (ENST00000529051.5/80071, intron 13 of 15)	11	125037456	125040963	3508	1	80071	ENST00000530061.1	-4920	ENSG00000149548	CCDC15	coiled-coil domain containing 15
chr3	6559725	6560795	1071	*	Peak_7894	224	.	Intron (ENST00000433639.1/ENST00000433639.1, intron 1 of 4)	3	6631689	6644894	13206	2	101927347	ENST00000455623.1	84099	ENSG00000226258	GRM7-AS3	GRM7 antisense RNA 3
chr17	75511702	75512286	585	*	Peak_8000	223	.	Promoter (1-2kb)	17	75500809	75509888	9080	2	57513	ENST00000433559.6	-1814	ENSG00000177303	CASKIN2	CASK interacting protein 2
chr9	33353448	33354384	937	*	Peak_8046	222	.	Exon (ENST00000379540.7/4799, exon 18 of 24)	9	33342812	33351882	9071	1	4799	ENST00000466971.1	10636	ENSG00000086102	NFX1	nuclear transcription factor, X-box binding 1
chr17	58195139	58196467	1329	*	Peak_8052	221	.	Promoter (2-3kb)	17	58192737	58205174	12438	1	8288	ENST00000225371.5	2402	ENSG00000121053	EPX	eosinophil peroxidase
chr14	104880112	104880946	835	*	Peak_8088	220	.	Exon (ENST00000556508.5/283638, exon 5 of 18)	14	104893934	104895059	1126	1	283638	ENST00000251181.8	-12988	ENSG00000099814	CEP170B	centrosomal protein 170B
chr16	67014794	67015693	900	*	Peak_8193	217	.	Distal Intergenic	16	67006523	67009418	2896	1	283848	ENST00000544478.1	8271	ENSG00000172824	CES4A	carboxylesterase 4A
chr21	42636686	42637281	596	*	Peak_8228	216	.	Distal Intergenic	21	42653636	42754064	100429	1	5152	ENST00000460905.5	-16355	ENSG00000160191	PDE9A	phosphodiesterase 9A
chr6	115170682	115171656	975	*	Peak_8421	214	.	Distal Intergenic	6	115633542	115634191	650	2	105377962	ENST00000446525.1	462535	NA	LINC02534	long intergenic non-protein coding RNA 2534
chr3	13074045	13074772	728	*	Peak_8576	210	.	Promoter (<=1kb)	3	12900849	13073117	172269	2	9922	ENST00000613206.1	-928	ENSG00000144711	IQSEC1	IQ motif and Sec7 domain 1
chr12	1650785	1651422	638	*	Peak_8695	206	.	Distal Intergenic	12	1644797	1646533	1737	1	81029	ENST00000545747.1	5988	ENSG00000111186	WNT5B	Wnt family member 5B
chr1	101294801	101295427	627	*	Peak_8736	205	.	Distal Intergenic	1	101323337	101350176	26840	1	104355286	ENST00000454466.1	-27910	ENSG00000231671	LINC01307	long intergenic non-protein coding RNA 1307
chr21	14557406	14558001	596	*	Peak_8876	203	.	Intron (ENST00000644288.1/64092, intron 2 of 8)	21	14485229	14546360	61132	2	64092	ENST00000619120.4	-11046	ENSG00000155307	SAMSN1	SAM domain, SH3 domain and nuclear localization signals 1
chr3	195597615	195598202	588	*	Peak_8904	203	.	Distal Intergenic	3	195568702	195584205	15504	2	347	ENST00000343267.7	-13410	ENSG00000189058	APOD	apolipoprotein D
chr9	35349510	35350190	681	*	Peak_9031	201	.	Intron (ENST00000617908.4/10497, intron 10 of 40)	9	35341830	35405324	63495	1	10497	ENST00000636694.1	7680	ENSG00000198722	UNC13B	unc-13 homolog B
chr20	23245572	23246189	618	*	Peak_9038	200	.	Distal Intergenic	20	23350736	23354777	4042	1	29107	ENST00000254998.2	-104547	ENSG00000132661	NXT1	nuclear transport factor 2 like export factor 1
chr15	64874275	64875335	1061	*	Peak_9118	199	.	Intron (ENST00000502574.1/80301, intron 5 of 5)	15	64841948	64930920	88973	1	80301	ENST00000437723.1	32327	ENSG00000241839	PLEKHO2	pleckstrin homology domain containing O2
chr9	134797057	134797595	539	*	Peak_9121	199	.	Intron (ENST00000371817.7/1289, intron 36 of 65)	9	134808961	134810457	1497	1	1289	ENST00000463925.1	-11366	ENSG00000130635	COL5A1	collagen type V alpha 1 chain
chr14	96241223	96241636	414	*	Peak_9130	199	.	Promoter (<=1kb)	14	96242141	96263847	21707	1	623	ENST00000555847.1	-505	ENSG00000100739	BDKRB1	bradykinin receptor B1
chr11	65937317	65939110	1794	*	Peak_9131	199	.	Distal Intergenic	11	65945445	65959963	14519	1	254187	ENST00000532620.5	-6335	ENSG00000175513	TSGA10IP	testis specific 10 interacting protein
chr1	224208138	224208715	578	*	Peak_9205	196	.	Promoter (1-2kb)	1	224208747	224210412	1666	2	101927143	ENST00000453760.5	1697	ENSG00000232628	LOC101927143	uncharacterized LOC101927143
chr7	151886889	151887295	407	*	Peak_9287	195	.	Distal Intergenic	7	151877465	151879223	1759	1	100505483	ENST00000467458.2	9424	NA	PRKAG2-AS1	PRKAG2 antisense RNA 1
chr15	33302768	33303126	359	*	Peak_9372	193	.	Downstream (<1kb)	15	33303657	33310246	6590	2	101928134	ENST00000561458.5	7120	ENSG00000259446	LOC101928134	uncharacterized LOC101928134
chr5	113090874	113092283	1410	*	Peak_9566	192	.	Intron (ENST00000302475.8/4163, intron 6 of 16)	5	113101543	113104625	3083	2	4163	ENST00000505604.1	12342	ENSG00000171444	MCC	MCC regulator of WNT signaling pathway
chr14	105581452	105582391	940	*	Peak_9589	190	.	Distal Intergenic	14	105621116	105621180	65	1	102465871	ENST00000616769.1	-38725	ENSG00000274172	MIR8071-1	microRNA 8071-1
chr3	48795845	48796454	610	*	Peak_9616	190	.	Promoter (1-2kb)	3	48751258	48794013	42756	2	5576	ENST00000437821.2	-1832	ENSG00000114302	PRKAR2A	protein kinase cAMP-dependent type II regulatory subunit alpha
chr15	59216794	59217426	633	*	Peak_9642	190	.	Promoter (<=1kb)	15	59208809	59218296	9488	2	4643	ENST00000559489.1	870	ENSG00000157483	MYO1E	myosin IE
chr8	41202297	41203961	1665	*	Peak_9756	188	.	Distal Intergenic	8	41271048	41271143	96	2	100847068	ENST00000579992.1	67182	ENSG00000263372	MIR548AO	microRNA 548ao
chr5	65711613	65712530	918	*	Peak_9777	188	.	Intron (ENST00000381007.8/54557, intron 3 of 10)	5	65665928	65722130	56203	2	54557	ENST00000381007.8	9600	ENSG00000197860	SGTB	small glutamine rich tetratricopeptide repeat containing beta
chr6	134880707	134881380	674	*	Peak_9815	186	.	Distal Intergenic	6	134918530	134929161	10632	2	64577	ENST00000460753.1	47781	ENSG00000118514	ALDH8A1	aldehyde dehydrogenase 8 family member A1
chr17	40090968	40092005	1038	*	Peak_9900	183	.	3' UTR	17	40084434	40087001	2568	1	7067	ENST00000577637.1	6534	ENSG00000126351	THRA	thyroid hormone receptor alpha
chr4	1572090	1573464	1375	*	Peak_9901	183	.	Distal Intergenic	4	1641562	1644953	3392	2	152877	ENST00000467215.1	71489	ENSG00000174137	FAM53A	family with sequence similarity 53 member A
chr7	103824378	103825287	910	*	Peak_10060	183	.	Intron (ENST00000343529.9/5649, intron 3 of 63)	7	103471784	103989516	517733	2	5649	ENST00000343529.9	164229	ENSG00000189056	RELN	reelin
chr3	56873382	56873708	327	*	Peak_10178	182	.	Intron (ENST00000338458.8/50650, intron 4 of 12)	3	56728987	56916471	187485	2	50650	ENST00000496106.5	42763	ENSG00000163947	ARHGEF3	Rho guanine nucleotide exchange factor 3
chr19	31345064	31345723	660	*	Peak_10243	180	.	Intron (ENST00000240587.4/57616, intron 1 of 1)	19	31308345	31349255	40911	2	57616	ENST00000558569.1	3532	ENSG00000121297	TSHZ3	teashirt zinc finger homeobox 3
chr20	25603869	25604461	593	*	Peak_10247	180	.	Distal Intergenic	20	25452826	25585517	132692	2	22981	ENST00000422516.5	-18352	ENSG00000101004	NINL	ninein like
chr14	104096974	104097449	476	*	Peak_10303	179	.	Intron (ENST00000551177.5/374569, intron 4 of 15)	14	104093491	104105382	11892	1	374569	ENST00000551170.1	3483	ENSG00000166183	ASPG	asparaginase
chr20	45775010	45775837	828	*	Peak_10317	179	.	Exon (ENST00000481847.5/140686, exon 3 of 6)	20	45774213	45779893	5681	2	140686	ENST00000474942.5	4056	ENSG00000124116	WFDC3	WAP four-disulfide core domain 3
chr11	10450313	10450858	546	*	Peak_10399	179	.	Promoter (<=1kb)	11	10450321	10482168	31848	1	272	ENST00000529835.6	0	ENSG00000133805	AMPD3	adenosine monophosphate deaminase 3
chr11	14850598	14851527	930	*	Peak_10522	175	.	Intron (ENST00000282096.8/5140, intron 12 of 15)	11	14878012	14885841	7830	2	120227	ENST00000525015.1	34314	ENSG00000186104	CYP2R1	cytochrome P450 family 2 subfamily R member 1
chr10	80238341	80238770	430	*	Peak_10594	173	.	Intron (ENST00000423182.2/ENST00000423182.2, intron 2 of 4)	10	80208209	80218614	10406	1	439990	ENST00000432308.1	30132	ENSG00000237523	LINC00857	long intergenic non-protein coding RNA 857
chr1	21802903	21803487	585	*	Peak_10870	172	.	Distal Intergenic	1	21812265	21825221	12957	1	401944	ENST00000344642.6	-8778	ENSG00000187942	LDLRAD2	low density lipoprotein receptor class A domain containing 2
chr7	151615673	151616645	973	*	Peak_10894	171	.	Intron (ENST00000287878.8/51422, intron 5 of 15)	7	151572408	151632168	59761	2	51422	ENST00000491938.5	15523	ENSG00000106617	PRKAG2	protein kinase AMP-activated non-catalytic subunit gamma 2
chr5	80281242	80281744	503	*	Peak_10941	171	.	Distal Intergenic	5	80138727	80256079	117353	2	256987	ENST00000507668.6	-25163	ENSG00000164300	SERINC5	serine incorporator 5
chr17	79482821	79483962	1142	*	Peak_11002	170	.	Promoter (<=1kb)	17	79089345	79482598	393254	2	146713	ENST00000583458.5	-223	ENSG00000167281	RBFOX3	RNA binding fox-1 homolog 3
chr17	1073499	1073831	333	*	Peak_11162	166	.	Exon (ENST00000302538.9/29, exon 7 of 23)	17	1050554	1069983	19430	2	29	ENST00000574544.1	-3516	ENSG00000159842	ABR	ABR activator of RhoGEF and GTPase
chr15	55783208	55783797	590	*	Peak_11334	164	.	Distal Intergenic	15	55738223	55743090	4868	2	283659	ENST00000561292.1	-40118	ENSG00000166450	PRTG	protogenin
chr3	95107656	95107974	319	*	Peak_11405	164	.	Intron (ENST00000462219.5/255025, intron 2 of 3)	3	94962930	94991243	28314	1	255025	ENST00000466560.1	144726	ENSG00000239589	LINC00879	long intergenic non-protein coding RNA 879
chr5	76371129	76372067	939	*	Peak_11631	162	.	Distal Intergenic	5	76403249	76708132	304884	1	10788	ENST00000274364.10	-31182	ENSG00000145703	IQGAP2	IQ motif containing GTPase activating protein 2
chr11	90972089	90972560	472	*	Peak_11597	162	.	Exon (ENST00000623482.1/ENST00000623482.1, exon 1 of 1)	11	90869121	90869202	82	2	100302228	ENST00000408659.1	-102887	ENSG00000221586	MIR1261	microRNA 1261
chr2	112700966	112701826	861	*	Peak_11675	162	.	Distal Intergenic	2	112721486	112742879	21394	1	284958	ENST00000327581.4	-19660	ENSG00000144130	NT5DC4	5'-nucleotidase domain containing 4
chr17	64287978	64288777	800	*	Peak_11668	162	.	Distal Intergenic	17	64147687	64263301	115615	2	55852	ENST00000584379.5	-24677	ENSG00000136478	TEX2	testis expressed 2
chr3	45182985	45184508	1524	*	Peak_11711	161	.	Distal Intergenic	3	45110216	45146422	36207	2	64866	ENST00000425231.2	-36563	ENSG00000163814	CDCP1	CUB domain containing protein 1
chr17	47704431	47705004	574	*	Peak_11777	160	.	Intron (ENST00000361722.7/9755, intron 6 of 8)	17	47695685	47711490	15806	1	9755	ENST00000622396.1	8746	ENSG00000198933	TBKBP1	TBK1 binding protein 1
chr6	41654454	41656910	2457	*	Peak_11879	158	.	Distal Intergenic	6	41646254	41650112	3859	1	4188	ENST00000471092.1	8200	ENSG00000112559	MDFI	MyoD family inhibitor
chr10	97185572	97186367	796	*	Peak_11910	157	.	Promoter (<=1kb)	10	96998038	97185920	187883	2	6585	ENST00000266058.8	0	ENSG00000187122	SLIT1	slit guidance ligand 1
chr4	17327530	17328856	1327	*	Peak_11953	156	.	Distal Intergenic	4	17320746	17320882	137	2	109616994	ENST00000384053.1	-6648	ENSG00000206780	SNORA75B	small nucleolar RNA, H/ACA box 75B
chr1	1901467	1902310	844	*	Peak_12010	155	.	Distal Intergenic	1	1785285	1891117	105833	2	2782	ENST00000615252.4	-10350	ENSG00000078369	GNB1	G protein subunit beta 1
chr5	148914136	148915136	1001	*	Peak_12568	151	.	Distal Intergenic	5	148825245	148828687	3443	1	154	ENST00000305988.5	88891	ENSG00000169252	ADRB2	adrenoceptor beta 2
chr16	1507216	1508608	1393	*	Peak_12726	147	.	Promoter (<=1kb)	16	1506534	1510457	3924	1	9894	ENST00000568240.1	682	ENSG00000100726	TELO2	telomere maintenance 2
chr17	74912352	74912825	474	*	Peak_12752	147	.	Distal Intergenic	17	74916084	74923256	7173	2	124590	ENST00000614341.4	10431	ENSG00000182040	USH1G	USH1 protein network component sans
chr11	80756911	80757396	486	*	Peak_12778	147	.	Intron (ENST00000526840.1/101928944, intron 2 of 2)	11	80751200	80762826	11627	2	101928944	ENST00000526840.1	5430	ENSG00000255178	LOC101928944	uncharacterized LOC101928944
chr1	1925287	1925736	450	*	Peak_12811	146	.	Promoter (1-2kb)	1	1922083	1927403	5321	2	85452	ENST00000412120.2	1667	ENSG00000142609	CFAP74	cilia and flagella associated protein 74
chr18	50139756	50140600	845	*	Peak_12814	146	.	Intron (ENST00000285039.11/4645, intron 1 of 39)	18	50126499	50126563	65	2	100422865	ENST00000636981.1	-13193	ENSG00000283343	MIR4320	microRNA 4320
chr5	27963205	27963797	593	*	Peak_13163	145	.	Distal Intergenic	5	28286389	28287665	1277	2	105374698	ENST00000512849.1	323868	ENSG00000249785	LINC02103	long intergenic non-protein coding RNA 2103
chr19	50786107	50786640	534	*	Peak_13281	145	.	Promoter (<=1kb)	19	50776141	50786117	9977	2	105372440	ENST00000563228.5	0	ENSG00000261341	LOC105372440	uncharacterized LOC105372440
chr15	28915222	28915639	418	*	Peak_13276	145	.	Intron (ENST00000561069.5/321, intron 1 of 14)	15	28919367	29054094	134728	1	321	ENST00000558804.5	-3728	ENSG00000034053	APBA2	amyloid beta precursor protein binding family A member 2
chr7	99425807	99426192	386	*	Peak_13344	144	.	Intron (ENST00000292478.8/26024, intron 5 of 7)	7	99429098	99435019	5922	2	26024	ENST00000485746.1	8827	ENSG00000106246	PTCD1	pentatricopeptide repeat domain 1
chr3	52229736	52230274	539	*	Peak_13513	141	.	Promoter (<=1kb)	3	52223920	52229773	5854	2	54106	ENST00000478201.1	0	ENSG00000239732	TLR9	toll like receptor 9
chr9	108016569	108017100	532	*	Peak_13526	140	.	Distal Intergenic	9	107488989	107490482	1494	2	9314	ENST00000420475.1	-526087	ENSG00000136826	KLF4	Kruppel like factor 4
chr4	53987716	53988365	650	*	Peak_13541	140	.	Promoter (<=1kb)	4	53986587	53987058	472	2	402176	ENST00000491826.2	-658	NA	RPL21P44	ribosomal protein L21 pseudogene 44
chr16	122908	123543	636	*	Peak_13705	137	.	5' UTR	16	93259	119405	26147	2	8131	ENST00000473674.5	-3503	ENSG00000103148	NPRL3	NPR3 like, GATOR1 complex subunit
chr11	105059942	105060474	533	*	Peak_13836	136	.	Intron (ENST00000525374.1/114769, intron 1 of 3)	11	105063345	105071541	8197	2	440067	ENST00000526830.1	11067	NA	CASP1P2	caspase 1 pseudogene 2
chr5	105882826	105883381	556	*	Peak_14211	135	.	Distal Intergenic	5	105099473	105100098	626	1	9366	ENST00000519581.1	783353	ENSG00000232159	RAB9BP1	RAB9B, member RAS oncogene family pseudogene 1
chr4	4879143	4879599	457	*	Peak_14201	135	.	Distal Intergenic	4	4862428	4863028	601	1	4487	ENST00000468421.1	16715	ENSG00000163132	MSX1	msh homeobox 1
chr6	63213902	63214755	854	*	Peak_14234	135	.	Distal Intergenic	6	63280021	63319943	39923	2	51557	ENST00000622415.1	105188	ENSG00000146166	LGSN	lengsin, lens protein with glutamine synthetase domain
chr12	105360164	105360911	748	*	Peak_14353	135	.	Intron (ENST00000548458.6/387882, intron 3 of 6)	12	105353509	105371203	17695	1	387882	ENST00000548336.1	6655	ENSG00000235162	C12orf75	chromosome 12 open reading frame 75
chr8	125849729	125850197	469	*	Peak_14416	134	.	Distal Intergenic	8	125922308	125951150	28843	2	100130231	ENST00000522865.5	100953	ENSG00000245164	LINC00861	long intergenic non-protein coding RNA 861
chr11	66351029	66351660	632	*	Peak_14418	134	.	Exon (ENST00000580881.1/ENST00000580881.1, exon 3 of 5)	11	66347950	66363760	15811	1	102724064	ENST00000531602.1	3079	ENSG00000255468	LOC102724064	uncharacterized LOC102724064
chr6	73248035	73248462	428	*	Peak_14482	133	.	Intron (ENST00000423730.3/80759, intron 1 of 7)	6	73241317	73242561	1245	2	80759	ENST00000610330.1	-5474	ENSG00000135314	KHDC1	KH domain containing 1
chr19	19624352	19625180	829	*	Peak_14730	129	.	Promoter (2-3kb)	19	19627209	19627800	592	2	9170	ENST00000592061.1	2620	ENSG00000064547	LPAR2	lysophosphatidic acid receptor 2
chr1	43661643	43662326	684	*	Peak_14717	129	.	Intron (ENST00000645057.1/9682, intron 4 of 25)	1	43666285	43667062	778	1	9682	ENST00000472265.1	-3959	ENSG00000066135	KDM4A	lysine demethylase 4A
chr12	46517645	46518398	754	*	Peak_14773	129	.	Intron (ENST00000611243.1/100288798, intron 1 of 1)	12	46537502	46652550	115049	1	100288798	ENST00000607353.1	-19104	NA	LOC100288798	uncharacterized LOC100288798
chr3	183543615	183544124	510	*	Peak_14959	128	.	Promoter (<=1kb)	3	183520212	183544785	24574	2	89857	ENST00000487643.1	661	ENSG00000172578	KLHL6	kelch like family member 6
chr6	149254104	149254400	297	*	Peak_15356	126	.	Intron (ENST00000606202.1/23118, intron 1 of 1)	6	149247321	149257543	10223	2	105378049	ENST00000637865.1	3143	ENSG00000225924	TAB2-AS1	TAB2 antisense RNA 1
chr14	72387602	72388052	451	*	Peak_15149	126	.	Intron (ENST00000553525.5/9628, intron 3 of 17)	14	72420979	72474069	53091	1	9628	ENST00000553690.5	-32927	ENSG00000182732	RGS6	regulator of G protein signaling 6
chr11	85013020	85013365	346	*	Peak_15466	126	.	Intron (ENST00000376104.6/1740, intron 6 of 27)	11	83455012	84923589	1468578	2	1740	ENST00000398309.6	-89431	ENSG00000150672	DLG2	discs large MAGUK scaffold protein 2
chr20	62564432	62565016	585	*	Peak_15518	126	.	Promoter (<=1kb)	20	62564912	62565013	102	1	406923	ENST00000347538.2	0	ENSG00000284508	MIR133A2	microRNA 133a-2
chr19	40637147	40637862	716	*	Peak_15526	126	.	Distal Intergenic	19	40627259	40629811	2553	1	8425	ENST00000598166.2	9888	ENSG00000090006	LTBP4	latent transforming growth factor beta binding protein 4
chr4	47700318	47700741	424	*	Peak_15616	125	.	Intron (ENST00000273857.8/10699, intron 5 of 21)	4	47642841	47661860	19020	2	10699	ENST00000505754.1	-38458	ENSG00000145244	CORIN	corin, serine peptidase
chr6	46923358	46923745	388	*	Peak_15619	125	.	Promoter (1-2kb)	6	46852512	46921977	69466	2	221395	ENST00000283296.11	-1381	ENSG00000069122	ADGRF5	adhesion G protein-coupled receptor F5
chr17	82765510	82766174	665	*	Peak_15715	123	.	Intron (ENST00000355528.8/6904, intron 3 of 38)	17	82752158	82942709	190552	1	6904	ENST00000539345.6	13352	ENSG00000141556	TBCD	tubulin folding cofactor D
chr20	37333078	37333655	578	*	Peak_15741	123	.	Distal Intergenic	20	37344685	37382787	38103	1	6714	ENST00000497734.5	-11030	ENSG00000197122	SRC	SRC proto-oncogene, non-receptor tyrosine kinase
chr8	144151352	144151882	531	*	Peak_15772	122	.	Promoter (2-3kb)	8	144148810	144252668	103859	1	727957	ENST00000527552.5	2542	ENSG00000179832	MROH1	maestro heat like repeat family member 1
chr7	29981584	29982283	700	*	Peak_15798	122	.	Intron (ENST00000242059.9/9805, intron 1 of 7)	7	29923562	29989712	66151	2	9805	ENST00000425819.6	7429	ENSG00000136193	SCRN1	secernin 1
chr1	16092655	16093160	506	*	Peak_15825	122	.	Distal Intergenic	1	16058279	16073632	15354	2	348487	ENST00000494078.1	-19023	ENSG00000185519	FAM131C	family with sequence similarity 131 member C
chr19	47271195	47271652	458	*	Peak_15879	122	.	Promoter (2-3kb)	19	47274453	47275707	1255	1	255783	ENST00000552360.3	-2801	ENSG00000257704	INAFM1	InaF motif containing 1
chr8	141269099	141270184	1086	*	Peak_15911	122	.	Intron (ENST00000520137.1/57210, intron 1 of 3)	8	141254565	141256817	2253	1	105375787	ENST00000518520.1	14534	ENSG00000254019	LOC105375787	uncharacterized LOC105375787
chr8	132937814	132938276	463	*	Peak_15935	121	.	Intron (ENST00000220616.8/7038, intron 25 of 47)	8	132919440	133134827	215388	1	7038	ENST00000519178.5	18374	ENSG00000042832	TG	thyroglobulin
chr1	109771322	109772536	1215	*	Peak_15940	121	.	Intron (ENST00000429410.2/2949, intron 1 of 1)	1	109750081	109764027	13947	2	79574	ENST00000369805.7	-7295	ENSG00000198758	EPS8L3	EPS8 like 3
chr19	48908312	48908652	341	*	Peak_15978	120	.	Promoter (2-3kb)	19	48911218	48921866	10649	1	4924	ENST00000465524.5	-2566	ENSG00000104805	NUCB1	nucleobindin 1
chr16	81667838	81668933	1096	*	Peak_15995	120	.	Intron (ENST00000537098.7/80790, intron 7 of 20)	16	81651191	81667276	16086	1	80790	ENST00000566462.2	16647	ENSG00000153815	CMIP	c-Maf inducing protein
chr1	24583389	24583904	516	*	Peak_16195	119	.	Intron (ENST00000374392.2/400746, intron 1 of 3)	1	24589464	24609328	19865	1	400746	ENST00000486262.1	-5560	ENSG00000184454	NCMAP	non-compact myelin associated protein
chr17	81845987	81846656	670	*	Peak_16262	118	.	Promoter (<=1kb)	17	81845681	81846507	827	2	5034	ENST00000474712.1	0	ENSG00000185624	P4HB	prolyl 4-hydroxylase subunit beta
chr8	37835604	37836543	940	*	Peak_16277	118	.	Exon (ENST00000412232.2/25960, exon 13 of 19)	8	37844702	37849838	5137	2	55290	ENST00000520601.5	13295	ENSG00000104221	BRF2	BRF2 RNA polymerase III transcription initiation factor subunit
chr10	119389082	119389747	666	*	Peak_16280	118	.	Intron (ENST00000392870.2/2869, intron 3 of 15)	10	119377972	119378043	72	1	100616398	ENST00000580598.1	11110	ENSG00000265719	MIR4681	microRNA 4681
chr22	21749420	21750176	757	*	Peak_16575	118	.	Distal Intergenic	22	21697544	21735834	38291	2	29799	ENST00000339468.7	-13586	ENSG00000100027	YPEL1	yippee like 1
chr7	141203486	141203868	383	*	Peak_16726	118	.	Intron (ENST00000565468.5/100507421, intron 1 of 3)	7	141074393	141212764	138372	1	100507421	ENST00000563442.1	129093	ENSG00000261115	TMEM178B	transmembrane protein 178B
chr9	75599163	75599556	394	*	Peak_16775	118	.	Distal Intergenic	9	75890644	76362339	471696	1	5125	ENST00000545128.5	-291088	ENSG00000099139	PCSK5	proprotein convertase subtilisin/kexin type 5
chr3	157695854	157696344	491	*	Peak_16891	117	.	Distal Intergenic	3	157543444	157601082	57639	1	152078	ENST00000426338.2	152410	ENSG00000174899	PQLC2L	PQ loop repeat containing 2 like
chr6	148877389	148877911	523	*	Peak_16912	116	.	Intron (ENST00000367463.4/10090, intron 1 of 7)	6	148953907	149005588	51682	1	10090	ENST00000473631.1	-75996	ENSG00000111962	UST	uronyl 2-sulfotransferase
chr17	49386875	49387476	602	*	Peak_17032	115	.	Intron (ENST00000576461.1/102724596, intron 2 of 2)	17	49375380	49380094	4715	1	102724596	ENST00000511322.1	11495	ENSG00000248714	LOC102724596	uncharacterized LOC102724596
chr6	13587541	13588324	784	*	Peak_17045	115	.	Intron (ENST00000397350.6/23408, intron 3 of 8)	6	13584203	13589543	5341	1	23408	ENST00000637463.1	3338	ENSG00000124523	SIRT5	sirtuin 5
chr7	151945843	151946255	413	*	Peak_17171	114	.	Distal Intergenic	7	151956379	152019926	63548	1	168391	ENST00000431418.6	-10124	ENSG00000106648	GALNTL5	polypeptide N-acetylgalactosaminyltransferase like 5
chr22	43024949	43025392	444	*	Peak_17219	114	.	Distal Intergenic	22	42869771	43015145	145375	2	11252	ENST00000263246.7	-9804	ENSG00000100266	PACSIN2	protein kinase C and casein kinase substrate in neurons 2
chr1	16470515	16470967	453	*	Peak_17218	114	.	Intron (ENST00000263511.8/114819, intron 14 of 14)	1	16460948	16468481	7534	1	107984921	ENST00000457898.1	9567	ENSG00000226029	LINC01772	long intergenic non-protein coding RNA 1772
chr11	82792897	82793325	429	*	Peak_17234	113	.	Intron (ENST00000526305.1/ENST00000526305.1, intron 1 of 1)	11	82824373	82840843	16471	2	5547	ENST00000532709.5	47518	ENSG00000137509	PRCP	prolylcarboxypeptidase
chr8	11360077	11360590	514	*	Peak_17410	112	.	Intron (ENST00000525246.5/157739, intron 4 of 8)	8	11363784	11365801	2018	1	157739	ENST00000636013.1	-3194	ENSG00000154316	TDH	L-threonine dehydrogenase (pseudogene)
chrX	153504949	153505726	778	*	Peak_17535	111	.	Promoter (<=1kb)	23	153505869	153508805	2937	1	633	ENST00000492658.1	-143	ENSG00000182492	BGN	biglycan
chr11	46899550	46900074	525	*	Peak_17438	111	.	Exon (ENST00000378623.5/4038, exon 4 of 38)	11	46883924	46889687	5764	2	4038	ENST00000529921.1	-9863	ENSG00000134569	LRP4	LDL receptor related protein 4
chr17	47511819	47512281	463	*	Peak_17642	110	.	Distal Intergenic	17	47522942	47582844	59903	1	9520	ENST00000525007.5	-10661	ENSG00000141279	NPEPPS	aminopeptidase puromycin sensitive
chr11	133950134	133950478	345	*	Peak_17784	109	.	Promoter (1-2kb)	11	133944284	133952216	7933	2	22997	ENST00000526663.1	1738	ENSG00000080854	IGSF9B	immunoglobulin superfamily member 9B
chr6	131722812	131723415	604	*	Peak_18101	109	.	Intron (ENST00000414305.5/5169, intron 19 of 25)	6	131708684	131711017	2334	2	643854	ENST00000314099.9	-11795	ENSG00000236761	CTAGE9	CTAGE family member 9
chr3	158917028	158917633	606	*	Peak_18300	108	.	Distal Intergenic	3	158962235	159764599	802365	1	100505385	ENST00000639147.1	-44602	ENSG00000283154	IQCJ-SCHIP1	IQCJ-SCHIP1 readthrough
chr8	144108626	144109091	466	*	Peak_18378	108	.	Promoter (<=1kb)	8	144103117	144108124	5008	2	81858	ENST00000533184.1	-502	ENSG00000179526	SHARPIN	SHANK associated RH domain interactor
chr12	51357710	51358080	371	*	Peak_18390	107	.	Promoter (2-3kb)	12	51353769	51360226	6458	2	11226	ENST00000603680.5	2146	ENSG00000139629	GALNT6	polypeptide N-acetylgalactosaminyltransferase 6
chr17	20298448	20298855	408	*	Peak_18478	107	.	Promoter (1-2kb)	17	20297034	20306173	9140	1	92521	ENST00000578153.1	1414	ENSG00000128487	SPECC1	sperm antigen with calponin homology and coiled-coil domains 1
chr10	103751710	103752115	406	*	Peak_18572	106	.	Intron (ENST00000627886.2/100505839, intron 3 of 3)	10	103746793	103754466	7674	1	100505839	ENST00000625265.1	4917	ENSG00000280693	SH3PXD2A-AS1	SH3PXD2A antisense RNA 1
chr7	149073143	149073616	474	*	Peak_18601	106	.	Intron (ENST00000316286.13/136051, intron 2 of 2)	7	149069963	149090705	20743	2	136051	ENST00000491431.1	17089	ENSG00000197362	ZNF786	zinc finger protein 786
chr17	2844152	2844635	484	*	Peak_18946	103	.	Intron (ENST00000637138.1/23108, intron 3 of 25)	17	2796482	3034771	238290	1	23108	ENST00000542807.1	47670	ENSG00000132359	RAP1GAP2	RAP1 GTPase activating protein 2
chr14	54790738	54791135	398	*	Peak_18934	103	.	3' UTR	14	54784266	54789128	4863	1	23034	ENST00000555719.1	6472	ENSG00000020577	SAMD4A	sterile alpha motif domain containing 4A
chr6	132006469	132006873	405	*	Peak_19064	103	.	Intron (ENST00000435287.1/ENST00000435287.1, intron 1 of 1)	6	131948176	131951373	3198	2	1490	ENST00000367976.3	-55096	ENSG00000118523	CCN2	cellular communication network factor 2
chr12	131637218	131637647	430	*	Peak_19041	103	.	Distal Intergenic	12	131647113	131648121	1009	2	105370085	ENST00000537280.1	10474	NA	LINC02414	long intergenic non-protein coding RNA 2414
chr8	94758825	94759353	529	*	Peak_19087	103	.	Intron (ENST00000414645.6/286148, intron 7 of 18)	8	94777678	94789835	12158	1	286148	ENST00000522669.1	-18325	ENSG00000156162	DPY19L4	dpy-19 like 4
chr3	52774334	52774713	380	*	Peak_19098	103	.	Promoter (2-3kb)	3	52777592	52792062	14471	1	3697	ENST00000273283.6	-2879	ENSG00000055957	ITIH1	inter-alpha-trypsin inhibitor heavy chain 1
chr8	141986454	141987158	705	*	Peak_19101	103	.	Distal Intergenic	8	142176339	142176418	80	1	100616268	ENST00000584349.1	-189181	ENSG00000265247	MIR4472-1	microRNA 4472-1
chr1	227311139	227311567	429	*	Peak_19106	103	.	Intron (ENST00000366767.7/8476, intron 1 of 34)	1	227193651	227317047	123397	2	8476	ENST00000478573.6	5480	ENSG00000143776	CDC42BPA	CDC42 binding protein kinase alpha
chr15	88239810	88240133	324	*	Peak_19109	103	.	Intron (ENST00000394480.6/4916, intron 3 of 18)	15	88137461	88252622	115162	2	4916	ENST00000559188.1	12489	ENSG00000140538	NTRK3	neurotrophic receptor tyrosine kinase 3
chr8	141206984	141207475	492	*	Peak_19269	101	.	3' UTR	8	141192331	141193070	740	1	22898	ENST00000520725.5	14653	ENSG00000105339	DENND3	DENN domain containing 3
chr17	68802348	68802687	340	*	Peak_19289	101	.	Distal Intergenic	17	68876314	68877646	1333	2	10351	ENST00000588458.1	74959	ENSG00000141338	ABCA8	ATP binding cassette subfamily A member 8
chr20	38888893	38889258	366	*	Peak_19310	101	.	Intron (ENST00000299824.5/26051, intron 2 of 10)	20	38926312	38953106	26795	1	81610	ENST00000619304.4	-37054	ENSG00000101447	FAM83D	family with sequence similarity 83 member D
chr5	34472349	34472597	249	*	Peak_19317	101	.	Distal Intergenic	5	34656237	34832627	176391	1	26064	ENST00000265109.7	-183640	ENSG00000039560	RAI14	retinoic acid induced 14
chr1	32978684	32979119	436	*	Peak_19372	100	.	Distal Intergenic	1	32936668	32964685	28018	2	127544	ENST00000235150.4	-13999	ENSG00000116514	RNF19B	ring finger protein 19B
chr6	103775173	103775555	383	*	Peak_19822	100	.	Distal Intergenic	6	104729170	104732370	3201	2	57531	ENST00000518228.1	956815	ENSG00000085382	HACE1	HECT domain and ankyrin repeat containing E3 ubiquitin protein ligase 1
chr1	119159051	119159608	558	*	Peak_19434	100	.	Intron (ENST00000440150.5/101929147, intron 2 of 3)	1	119146409	119147033	625	1	101929147	ENST00000445565.1	12642	ENSG00000231365	WARS2-AS1	WARS2 antisense RNA 1
chr9	62799090	62799449	360	*	Peak_19937	100	.	Promoter (2-3kb)	9	62801461	62810186	8726	1	103352539	ENST00000427509.5	-2012	ENSG00000238113	LINC01410	long intergenic non-protein coding RNA 1410
chr15	81094522	81095091	570	*	Peak_19567	100	.	Intron (ENST00000560091.5/161502, intron 1 of 4)	15	81099408	81136748	37341	1	161502	ENST00000561216.1	-4317	ENSG00000156206	CFAP161	cilia and flagella associated protein 161
chr1	61812434	61813122	689	*	Peak_19579	100	.	Intron (ENST00000642238.1/10207, intron 14 of 43)	1	61805510	62163504	357995	1	10207	ENST00000484937.5	6924	ENSG00000132849	PATJ	PATJ crumbs cell polarity complex component
chr1	37283226	37283601	376	*	Peak_19526	100	.	Intron (ENST00000413901.1/ENST00000413901.1, intron 1 of 3)	1	37161563	37161634	72	1	100422898	ENST00000579351.1	121663	ENSG00000264698	MIR4255	microRNA 4255
chr8	16552081	16552533	453	*	Peak_19905	100	.	Intron (ENST00000518026.5/4481, intron 1 of 5)	8	16175263	16567362	392100	2	4481	ENST00000518026.5	14829	ENSG00000038945	MSR1	macrophage scavenger receptor 1
chr12	25027774	25028300	527	*	Peak_19479	100	.	Intron (ENST00000636465.1/4033, intron 9 of 38)	12	25033759	25066503	32745	1	4033	ENST00000556485.5	-5459	ENSG00000118308	LRMP	lymphoid restricted membrane protein
chr13	25367785	25368376	592	*	Peak_19515	100	.	Distal Intergenic	13	25372071	26025851	653781	1	51761	ENST00000381655.6	-3695	ENSG00000132932	ATP8A2	ATPase phospholipid transporting 8A2
chr7	98641872	98642242	371	*	Peak_19899	100	.	Distal Intergenic	7	98619667	98627253	7587	1	4885	ENST00000466102.1	22205	ENSG00000106236	NPTX2	neuronal pentraxin 2
chr14	95389870	95390269	400	*	Peak_19550	100	.	Distal Intergenic	14	95329584	95335504	5921	1	101929080	ENST00000554522.1	60286	ENSG00000258630	LINC02292	long intergenic non-protein coding RNA 2292
chr12	52920652	52921436	785	*	Peak_20051	100	.	Intron (ENST00000552551.5/3856, intron 1 of 8)	12	52897297	52926469	29173	2	3856	ENST00000552150.5	5033	ENSG00000170421	KRT8	keratin 8
chr8	141555336	141555642	307	*	Peak_20075	100	.	Distal Intergenic	8	141433832	141507230	73399	2	389690	ENST00000430863.5	-48106	ENSG00000226807	MROH5	maestro heat like repeat family member 5 (gene/pseudogene)
chr4	2333752	2334724	973	*	Peak_20076	100	.	Intron (ENST00000290974.6/57732, intron 6 of 12)	4	2328534	2364804	36271	2	57732	ENST00000515169.5	30080	ENSG00000159733	ZFYVE28	zinc finger FYVE-type containing 28
chr2	84693251	84693638	388	*	Peak_20085	99	.	Intron (ENST00000389394.7/1768, intron 45 of 76)	2	84658307	84697842	39536	1	1768	ENST00000602588.1	34944	ENSG00000115423	DNAH6	dynein axonemal heavy chain 6
chr19	13969700	13970034	335	*	Peak_20145	99	.	Exon (ENST00000254325.8/5989, exon 10 of 21)	19	13963704	13964055	352	2	5989	ENST00000588520.1	-5645	ENSG00000132005	RFX1	regulatory factor X1
chr12	104526645	104527096	452	*	Peak_20117	99	.	Intron (ENST00000547956.1/50515, intron 1 of 1)	12	104588848	104757339	168492	1	50515	ENST00000549016.1	-61752	ENSG00000171310	CHST11	carbohydrate sulfotransferase 11
chr3	157668225	157668762	538	*	Peak_20222	99	.	Intron (ENST00000461040.5/152078, intron 3 of 3)	3	157543444	157601082	57639	1	152078	ENST00000426338.2	124781	ENSG00000174899	PQLC2L	PQ loop repeat containing 2 like
chr1	230252383	230252917	535	*	Peak_20236	99	.	Promoter (2-3kb)	1	230255358	230282120	26763	1	2590	ENST00000485438.1	-2441	ENSG00000143641	GALNT2	polypeptide N-acetylgalactosaminyltransferase 2
chr11	88552718	88553057	340	*	Peak_20273	99	.	Intron (ENST00000455756.6/2915, intron 8 of 8)	11	88511748	88512361	614	1	100873989	ENST00000531994.1	40970	ENSG00000255082	GRM5-AS1	GRM5 antisense RNA 1
chr19	3785527	3785851	325	*	Peak_20315	98	.	Promoter (<=1kb)	19	3785097	3786016	920	2	4145	ENST00000591059.1	165	ENSG00000007264	MATK	megakaryocyte-associated tyrosine kinase
chr5	142073745	142074403	659	*	Peak_20354	98	.	Distal Intergenic	5	142108505	142154443	45939	1	80762	ENST00000253814.5	-34102	ENSG00000131507	NDFIP1	Nedd4 family interacting protein 1
chr1	211922732	211923044	313	*	Peak_20381	98	.	Distal Intergenic	1	211941723	211966467	24745	2	25896	ENST00000612340.1	43423	ENSG00000143493	INTS7	integrator complex subunit 7
chr17	79939391	79940435	1045	*	Peak_20490	97	.	3' UTR	17	79943856	79950828	6973	2	125058	ENST00000572862.5	10393	ENSG00000167291	TBC1D16	TBC1 domain family member 16
chr17	82404995	82405318	324	*	Peak_20548	96	.	Promoter (1-2kb)	17	82396597	82403967	7371	2	79701	ENST00000582593.1	-1028	ENSG00000181396	OGFOD3	2-oxoglutarate and iron dependent oxygenase domain containing 3
chr12	28043550	28043859	310	*	Peak_20566	96	.	Distal Intergenic	12	27958090	27972705	14616	2	5744	ENST00000545234.5	-70845	ENSG00000087494	PTHLH	parathyroid hormone like hormone
chr9	127892118	127892531	414	*	Peak_20612	96	.	Intron (ENST00000643029.1/30815, intron 4 of 13)	9	127885321	127897408	12088	2	30815	ENST00000542456.5	4877	ENSG00000160408	ST6GALNAC6	ST6 N-acetylgalactosaminide alpha-2,6-sialyltransferase 6
chr14	72789116	72789553	438	*	Peak_20652	96	.	Intron (ENST00000556509.5/8110, intron 1 of 10)	14	72723632	72742711	19080	2	8110	ENST00000553608.1	-46405	ENSG00000205683	DPF3	double PHD fingers 3
chr12	52805713	52806352	640	*	Peak_20636	96	.	Downstream (<1kb)	12	52809075	52810927	1853	2	3851	ENST00000549295.1	4575	ENSG00000170477	KRT4	keratin 4
chr1	29947999	29948966	968	*	Peak_20642	96	.	Distal Intergenic	1	30013952	30037612	23661	2	101929406	ENST00000445180.2	88646	ENSG00000233399	LINC01648	long intergenic non-protein coding RNA 1648
chr2	240767014	240767595	582	*	Peak_20831	95	.	Exon (ENST00000649096.1/547, exon 17 of 47)	2	240769670	240771304	1635	2	547	ENST00000463388.2	3709	ENSG00000130294	KIF1A	kinesin family member 1A
chr12	31761685	31762033	349	*	Peak_20876	95	.	Distal Intergenic	12	31791185	31792241	1057	2	440093	ENST00000340398.4	30208	ENSG00000188375	H3F3C	H3 histone family member 3C
chr17	12408346	12408762	417	*	Peak_20881	95	.	Distal Intergenic	17	12549782	12637187	87406	1	284034	ENST00000313495.6	-141020	ENSG00000179136	LINC00670	long intergenic non-protein coding RNA 670
chr17	45818465	45819067	603	*	Peak_20951	95	.	Promoter (1-2kb)	17	45816558	45834841	18284	1	1394	ENST00000583888.1	1907	ENSG00000120088	CRHR1	corticotropin releasing hormone receptor 1
chr15	43252811	43253235	425	*	Peak_20956	94	.	Promoter (<=1kb)	15	43239212	43253658	14447	2	9333	ENST00000635871.1	423	ENSG00000104055	TGM5	transglutaminase 5
chr19	43644461	43644836	376	*	Peak_21046	94	.	Downstream (1-2kb)	19	43622368	43639839	17472	2	199731	ENST00000222374.2	-4622	ENSG00000105767	CADM4	cell adhesion molecule 4
chr7	134726741	134727638	898	*	Peak_21109	94	.	Distal Intergenic	7	134744252	134968402	224151	1	800	ENST00000417172.5	-16614	ENSG00000122786	CALD1	caldesmon 1
chr6	131732069	131732521	453	*	Peak_21106	94	.	Intron (ENST00000414305.5/5169, intron 21 of 25)	6	131708684	131711017	2334	2	643854	ENST00000314099.9	-21052	ENSG00000236761	CTAGE9	CTAGE family member 9
chr5	68372736	68373233	498	*	Peak_21146	93	.	Distal Intergenic	5	68292683	68295743	3061	1	5295	ENST00000520550.1	80053	ENSG00000145675	PIK3R1	phosphoinositide-3-kinase regulatory subunit 1
chr1	31579118	31579432	315	*	Peak_21153	93	.	Promoter (<=1kb)	1	31579753	31585876	6124	1	64129	ENST00000498429.5	-321	ENSG00000142910	TINAGL1	tubulointerstitial nephritis antigen like 1
chr6	31817516	31817961	446	*	Peak_21214	93	.	Promoter (2-3kb)	6	31815464	31817946	2483	1	3303	ENST00000375651.6	2052	ENSG00000204389	HSPA1A	heat shock protein family A (Hsp70) member 1A
chr5	128713246	128713763	518	*	Peak_21249	92	.	Intron (ENST00000508645.5/28965, intron 1 of 6)	5	128258037	128659185	401149	2	2201	ENST00000508053.5	-54061	ENSG00000138829	FBN2	fibrillin 2
chr2	40353669	40354183	515	*	Peak_21319	92	.	Intron (ENST00000406785.6/6546, intron 2 of 7)	2	40114731	40430271	315541	2	6546	ENST00000407929.6	76088	ENSG00000183023	SLC8A1	solute carrier family 8 member A1
chr4	1196075	1196609	535	*	Peak_21330	92	.	Promoter (<=1kb)	4	1171889	1195139	23251	2	10417	ENST00000502483.5	-936	ENSG00000159674	SPON2	spondin 2
chr5	10507793	10508617	825	*	Peak_21334	92	.	Promoter (<=1kb)	5	10504996	10509194	4199	2	389273	ENST00000506021.4	577	ENSG00000249160	LINC02213	long intergenic non-protein coding RNA 2213
chr1	156594669	156595200	532	*	Peak_21273	92	.	Promoter (1-2kb)	1	156595720	156596502	783	2	54865	ENST00000529520.5	1302	ENSG00000160818	GPATCH4	G-patch domain containing 4
chr5	22607921	22608235	315	*	Peak_21336	92	.	Intron (ENST00000504376.6/1010, intron 1 of 13)	5	22278011	22638994	360984	2	1010	ENST00000520668.1	30759	ENSG00000154162	CDH12	cadherin 12
chr11	425316	426023	708	*	Peak_21272	92	.	Intron (ENST00000526142.5/338440, intron 5 of 10)	11	417933	429758	11826	2	338440	ENST00000526142.5	3735	ENSG00000185101	ANO9	anoctamin 9
chr7	131927640	131928117	478	*	Peak_22022	92	.	Intron (ENST00000452219.5/101928782, intron 1 of 2)	7	131910220	131948953	38734	1	101928782	ENST00000415393.1	17420	ENSG00000224865	LOC101928782	uncharacterized LOC101928782
chr2	168010907	168011227	321	*	Peak_21742	92	.	Promoter (1-2kb)	2	167964308	168012661	48354	2	27347	ENST00000461000.1	1434	ENSG00000198648	STK39	serine/threonine kinase 39
chr2	28515678	28515977	300	*	Peak_21794	92	.	Intron (ENST00000416713.5/151056, intron 1 of 10)	2	28496119	28643152	147034	1	151056	ENST00000404858.5	19559	ENSG00000163803	PLB1	phospholipase B1
chr19	56302025	56302461	437	*	Peak_21702	92	.	Promoter (<=1kb)	19	56301990	56310450	8461	1	100506374	ENST00000587247.1	35	ENSG00000267710	EDDM13	epididymal protein 13
chr8	28230551	28230896	346	*	Peak_22084	92	.	Distal Intergenic	8	28158598	28190089	31492	1	55140	ENST00000517975.1	71953	ENSG00000134014	ELP3	elongator acetyltransferase complex subunit 3
chr2	23354435	23354768	334	*	Peak_21771	92	.	Distal Intergenic	2	23385217	23708606	323390	1	114818	ENST00000486442.5	-30449	ENSG00000119771	KLHL29	kelch like family member 29
chr1	148093927	148094358	432	*	Peak_21468	92	.	Distal Intergenic	1	148080598	148093883	13286	1	728920	ENST00000420737.2	13329	NA	PDE4DIPP1	phosphodiesterase 4D interacting protein pseudogene 1
chr1	57070383	57070700	318	*	Peak_21607	92	.	Intron (ENST00000371236.6/1600, intron 7 of 14)	1	57071178	57136583	65406	2	1600	ENST00000489267.1	65883	ENSG00000173406	DAB1	DAB adaptor protein 1
chr9	19680927	19681256	330	*	Peak_22108	92	.	Intron (ENST00000341998.6/25769, intron 1 of 9)	9	19507452	19786928	279477	2	25769	ENST00000341998.6	105672	ENSG00000155886	SLC24A2	solute carrier family 24 member 2
chr1	220998174	220998587	414	*	Peak_21507	92	.	Distal Intergenic	1	220881069	220884493	3425	1	3142	ENST00000427693.1	117105	ENSG00000136630	HLX	H2.0 like homeobox
chr4	4409263	4410036	774	*	Peak_21900	92	.	Exon (ENST00000421177.6/27065, exon 8 of 9)	4	4420221	4423688	3468	2	53407	ENST00000510296.1	13652	ENSG00000168818	STX18	syntaxin 18
chr4	1275328	1275665	338	*	Peak_21877	92	.	Intron (ENST00000578730.1/ENST00000578730.1, intron 1 of 2)	4	1289851	1340137	50287	1	10296	ENST00000303400.8	-14186	ENSG00000090316	MAEA	macrophage erythroblast attacher
chr22	39647028	39647346	319	*	Peak_21777	92	.	Intron (ENST00000407673.5/8911, intron 8 of 34)	22	39642797	39643512	716	1	8911	ENST00000471970.1	4231	ENSG00000100346	CACNA1I	calcium voltage-gated channel subunit alpha1 I
chrX	4908235	4908510	276	*	Peak_22160	92	.	Distal Intergenic	23	4627200	4633572	6373	2	101928201	ENST00000420725.1	-274663	ENSG00000236513	LOC101928201	uncharacterized LOC101928201
chr9	137740277	137740617	341	*	Peak_22106	92	.	Promoter (1-2kb)	9	137738607	137754221	15615	1	79813	ENST00000495657.5	1670	ENSG00000181090	EHMT1	euchromatic histone lysine methyltransferase 1
chr5	110210188	110210564	377	*	Peak_21915	92	.	Distal Intergenic	5	110289233	110430101	140869	2	642987	ENST00000507188.6	219537	ENSG00000186952	TMEM232	transmembrane protein 232
chr19	5848688	5849218	531	*	Peak_22189	92	.	Promoter (<=1kb)	19	5844540	5848905	4366	2	2525	ENST00000587048.1	0	ENSG00000171124	FUT3	fucosyltransferase 3 (Lewis blood group)
chr6	46553091	46553349	259	*	Peak_22195	92	.	Intron (ENST00000619708.4/51302, intron 10 of 10)	6	46586265	46587125	861	2	51302	ENST00000476076.1	33776	ENSG00000146233	CYP39A1	cytochrome P450 family 39 subfamily A member 1
chr11	60356504	60356825	322	*	Peak_22257	91	.	Intron (ENST00000532756.1/245802, intron 4 of 4)	11	60334977	60338700	3724	1	245802	ENST00000530509.1	21527	ENSG00000166926	MS4A6E	membrane spanning 4-domains A6E
chr18	45437298	45437581	284	*	Peak_22322	91	.	Intron (ENST00000586448.5/8170, intron 1 of 20)	18	45438174	45447346	9173	2	101927980	ENST00000592899.1	9765	NA	SLC14A2-AS1	SLC14A2 antisense RNA 1
chr11	971180	971587	408	*	Peak_22334	91	.	Intron (ENST00000529818.5/161, intron 3 of 4)	11	985384	986846	1463	1	161	ENST00000527917.1	-13797	ENSG00000183020	AP2A2	adaptor related protein complex 2 subunit alpha 2
chr1	202704021	202704938	918	*	Peak_22339	91	.	Intron (ENST00000367268.4/127833, intron 1 of 8)	1	202590596	202710417	119822	2	127833	ENST00000367268.4	5479	ENSG00000143858	SYT2	synaptotagmin 2
chr11	10133716	10134113	398	*	Peak_22344	91	.	Intron (ENST00000256190.12/81846, intron 2 of 39)	11	9838039	10193957	355919	2	81846	ENST00000533770.5	59844	ENSG00000133812	SBF2	SET binding factor 2
chr17	37400832	37401182	351	*	Peak_22348	91	.	Intron (ENST00000616317.4/31, intron 1 of 55)	17	37274217	37406672	132456	2	31	ENST00000615229.4	5490	ENSG00000278540	ACACA	acetyl-CoA carboxylase alpha
chr15	99421161	99421612	452	*	Peak_22347	91	.	Distal Intergenic	15	99384294	99386295	2002	1	123355	ENST00000561431.1	36867	ENSG00000168904	LRRC28	leucine rich repeat containing 28
chr2	25322225	25322661	437	*	Peak_22359	91	.	Intron (ENST00000264709.7/1788, intron 1 of 22)	2	25328640	25328721	82	2	100302246	ENST00000408518.3	6060	ENSG00000221445	MIR1301	microRNA 1301
chr2	6069358	6070069	712	*	Peak_22505	90	.	Distal Intergenic	2	5982571	6001275	18705	1	400940	ENST00000450794.1	86787	NA	LOC400940	uncharacterized LOC400940
chr2	2016002	2016576	575	*	Peak_22624	89	.	Intron (ENST00000647755.1/23040, intron 4 of 24)	2	1972368	1979777	7410	2	23040	ENST00000649587.1	-36225	ENSG00000186487	MYT1L	myelin transcription factor 1 like
chr20	46430895	46431489	595	*	Peak_22636	89	.	Promoter (1-2kb)	20	46387427	46432985	45559	2	63916	ENST00000487583.5	1496	ENSG00000062598	ELMO2	engulfment and cell motility 2
chr3	171685659	171686124	466	*	Peak_22655	89	.	Intron (ENST00000356327.9/5337, intron 15 of 25)	3	171653242	171677853	24612	2	5337	ENST00000471075.1	-7806	ENSG00000075651	PLD1	phospholipase D1
chr6	24539680	24540219	540	*	Peak_22661	89	.	Distal Intergenic	6	24532010	24533808	1799	1	7915	ENST00000492697.1	7670	ENSG00000112294	ALDH5A1	aldehyde dehydrogenase 5 family member A1
chr14	93832854	93833135	282	*	Peak_22668	89	.	Distal Intergenic	14	93718298	93788481	70184	2	145270	ENST00000393140.5	-44373	ENSG00000175785	PRIMA1	proline rich membrane anchor 1
chr22	11030682	11031079	398	*	Peak_22671	89	.	Distal Intergenic	22	10939388	10961338	21951	2	102723780	ENST00000635667.1	-69344	NA	FRG1FP	FSHD region gene 1 family member F, pseudogene
chr15	66632207	66633072	866	*	Peak_22751	89	.	Intron (ENST00000558797.1/102723165, intron 1 of 4)	15	66582190	66685794	103605	1	102723165	ENST00000558797.1	50017	ENSG00000259471	LINC01169	long intergenic non-protein coding RNA 1169
chr7	157018872	157019533	662	*	Peak_22755	89	.	Distal Intergenic	7	157010805	157016426	5622	1	645249	ENST00000480284.1	8067	ENSG00000243479	MNX1-AS1	MNX1 antisense RNA 1 (head to head)
chr19	5393634	5394085	452	*	Peak_22760	89	.	Distal Intergenic	19	5158495	5340803	182309	2	5802	ENST00000588552.5	-52831	ENSG00000105426	PTPRS	protein tyrosine phosphatase receptor type S
chr11	67999775	68000641	867	*	Peak_22802	88	.	Promoter (<=1kb)	11	67991104	67999194	8091	2	81622	ENST00000610659.4	-581	ENSG00000110057	UNC93B1	unc-93 homolog B1, TLR signaling regulator
chr16	3470633	3470963	331	*	Peak_22823	88	.	Intron (ENST00000575785.2/79903, intron 3 of 4)	16	3479580	3483799	4220	1	79903	ENST00000571798.1	-8617	ENSG00000122390	NAA60	N(alpha)-acetyltransferase 60, NatF catalytic subunit
chr1	225839278	225839844	567	*	Peak_22874	88	.	Exon (ENST00000272167.9/2052, exon 5 of 9)	1	225846576	225847465	890	2	9725	ENST00000496025.1	7621	ENSG00000196187	TMEM63A	transmembrane protein 63A
chr2	110904652	110905099	448	*	Peak_22966	88	.	Intron (ENST00000389811.8/55289, intron 10 of 18)	2	110963624	111101251	137628	1	55289	ENST00000443586.5	-58525	ENSG00000153093	ACOXL	acyl-CoA oxidase like
chr19	1078267	1078824	558	*	Peak_22952	88	.	Promoter (<=1kb)	19	1077487	1086628	9142	1	23526	ENST00000590577.2	780	ENSG00000180448	ARHGAP45	Rho GTPase activating protein 45
chr5	38063919	38064304	386	*	Peak_23029	88	.	Intron (ENST00000513039.2/105374731, intron 2 of 2)	5	38025697	38183932	158236	1	105374731	ENST00000513039.2	38222	ENSG00000248461	LINC02107	long intergenic non-protein coding RNA 2107
chr3	22066052	22066427	376	*	Peak_23002	88	.	Intron (ENST00000494118.5/79750, intron 2 of 6)	3	21957136	21979828	22693	1	100874221	ENST00000436306.1	108916	ENSG00000223351	ZNF385D-AS2	ZNF385D antisense RNA 2
chr18	24240092	24240366	275	*	Peak_23104	88	.	Intron (ENST00000319481.7/114876, intron 15 of 27)	18	24196035	24271611	75577	2	114876	ENST00000585247.5	31245	ENSG00000141447	OSBPL1A	oxysterol binding protein like 1A
chr5	1130870	1131276	407	*	Peak_23157	88	.	Distal Intergenic	5	1050376	1112035	61660	2	10723	ENST00000264930.9	-18835	ENSG00000113504	SLC12A7	solute carrier family 12 member 7
chr6	44106090	44106482	393	*	Peak_23201	87	.	Distal Intergenic	6	44126914	44155519	28606	1	55362	ENST00000259746.13	-20432	ENSG00000137216	TMEM63B	transmembrane protein 63B
chr6	134839496	134839891	396	*	Peak_23207	87	.	Distal Intergenic	6	134918530	134929161	10632	2	64577	ENST00000460753.1	89270	ENSG00000118514	ALDH8A1	aldehyde dehydrogenase 8 family member A1
chr1	201666410	201666729	320	*	Peak_23205	87	.	Intron (ENST00000367302.5/89796, intron 3 of 29)	1	201648249	201826969	178721	1	89796	ENST00000367296.8	18161	ENSG00000134369	NAV1	neuron navigator 1
chr9	16978233	16978769	537	*	Peak_23270	87	.	Intron (ENST00000649137.1/ENST00000649137.1, intron 5 of 7)	9	16552580	16870843	318264	2	54796	ENST00000486514.5	-107390	ENSG00000173068	BNC2	basonuclin 2
chr6	24879168	24879675	508	*	Peak_23284	87	.	Promoter (1-2kb)	6	24839373	24877365	37993	2	9750	ENST00000540914.5	-1803	ENSG00000111913	RIPOR2	RHO family interacting cell polarization regulator 2
chr3	16797407	16798095	689	*	Peak_23364	86	.	Distal Intergenic	3	16802651	17011084	208434	1	23228	ENST00000460467.1	-4556	ENSG00000154822	PLCL2	phospholipase C like 2
chr18	49291991	49292461	471	*	Peak_23425	86	.	Intron (ENST00000269445.10/54808, intron 8 of 16)	18	49163711	49258408	94698	2	54808	ENST00000582399.1	-33583	ENSG00000141627	DYM	dymeclin
chr4	3082554	3082875	322	*	Peak_23445	86	.	Intron (ENST00000649900.1/3064, intron 2 of 2)	4	3074681	3243960	169280	1	3064	ENST00000355072.10	7873	ENSG00000197386	HTT	huntingtin
chr17	56085938	56086505	568	*	Peak_23454	86	.	Intron (ENST00000635860.1/162282, intron 4 of 12)	17	56110958	56228550	117593	1	162282	ENST00000575594.1	-24453	ENSG00000153930	ANKFN1	ankyrin repeat and fibronectin type III domain containing 1
chr8	125376425	125376853	429	*	Peak_23480	85	.	Distal Intergenic	8	125363026	125367116	4091	1	286053	ENST00000521460.1	13399	ENSG00000156831	NSMCE2	NSE2 (MMS21) homolog, SMC5-SMC6 complex SUMO ligase
chr2	216198089	216198373	285	*	Peak_23485	85	.	Intron (ENST00000392133.7/7520, intron 21 of 22)	2	216204016	216205422	1407	1	7520	ENST00000485763.1	-5643	ENSG00000079246	XRCC5	X-ray repair cross complementing 5
chr19	55507937	55508328	392	*	Peak_23593	85	.	Intron (ENST00000389623.10/284297, intron 12 of 13)	19	55493891	55499973	6083	1	284297	ENST00000589020.1	14046	ENSG00000179954	SSC5D	scavenger receptor cysteine rich family member with 5 domains
chr6	28665766	28666248	483	*	Peak_23639	85	.	Distal Intergenic	6	28648286	28649066	781	2	387055	ENST00000456103.1	-16700	ENSG00000235570	LINC00533	long intergenic non-protein coding RNA 533
chr15	42224066	42224415	350	*	Peak_23562	85	.	Exon (ENST00000563846.5/ENST00000563846.5, exon 4 of 5)	15	42226603	42228804	2202	2	25963	ENST00000564329.1	4389	ENSG00000103978	TMEM87A	transmembrane protein 87A
chr12	80513452	80514350	899	*	Peak_23547	85	.	Promoter (<=1kb)	12	80512642	80539838	27197	1	374462	ENST00000547485.1	810	ENSG00000139304	PTPRQ	protein tyrosine phosphatase receptor type Q
chr12	130807609	130808194	586	*	Peak_23538	85	.	Intron (ENST00000261653.10/2054, intron 5 of 9)	12	130798393	130801460	3068	2	2054	ENST00000540889.1	-6149	ENSG00000111450	STX2	syntaxin 2
chr1	201062524	201063057	534	*	Peak_23535	85	.	Intron (ENST00000367338.7/779, intron 22 of 42)	1	200973807	201023700	49894	2	23046	ENST00000422435.2	-38824	ENSG00000116852	KIF21B	kinesin family member 21B
chr1	223077897	223078330	434	*	Peak_23691	85	.	Distal Intergenic	1	223123488	223132579	9092	2	7100	ENST00000642471.1	54249	ENSG00000187554	TLR5	toll like receptor 5
chr20	57161865	57162227	363	*	Peak_23704	85	.	Exon (ENST00000624276.1/ENST00000624276.1, exon 1 of 1)	20	57170917	57173589	2673	2	655	ENST00000476877.1	11362	ENSG00000101144	BMP7	bone morphogenetic protein 7
chr16	74867274	74867565	292	*	Peak_23711	85	.	Distal Intergenic	16	74874079	74886235	12157	2	79726	ENST00000569183.1	18670	ENSG00000103091	WDR59	WD repeat domain 59
chr17	80438473	80438777	305	*	Peak_23718	85	.	Distal Intergenic	17	80425504	80430343	4840	1	284131	ENST00000519331.1	12969	ENSG00000173818	ENDOV	endonuclease V
chr3	177134600	177135052	453	*	Peak_23747	84	.	Promoter (1-2kb)	3	177098471	177136245	37775	2	79718	ENST00000636478.1	1193	ENSG00000177565	TBL1XR1	transducin beta like 1 X-linked receptor 1
chr11	36274430	36274838	409	*	Peak_23764	84	.	Promoter (1-2kb)	11	36274473	36276416	1944	2	29099	ENST00000533643.1	1578	ENSG00000110442	COMMD9	COMM domain containing 9
chr6	88164176	88164444	269	*	Peak_24515	84	.	Promoter (<=1kb)	6	88139876	88164343	24468	2	1268	ENST00000369499.2	0	ENSG00000118432	CNR1	cannabinoid receptor 1
chr20	6126831	6127131	301	*	Peak_24198	84	.	Distal Intergenic	20	6074845	6123544	48700	2	55612	ENST00000217289.8	-3287	ENSG00000101311	FERMT1	fermitin family member 1
chr1	223068761	223069006	246	*	Peak_23954	84	.	Distal Intergenic	1	223123488	223132579	9092	2	7100	ENST00000642471.1	63573	ENSG00000187554	TLR5	toll like receptor 5
chr4	145406846	145407204	359	*	Peak_24378	84	.	Distal Intergenic	4	145335263	145340421	5159	2	105377466	ENST00000610239.1	-66425	ENSG00000272727	LINC02266	long intergenic non-protein coding RNA 2266
chr3	78023305	78023798	494	*	Peak_24355	84	.	Distal Intergenic	3	78038705	78046794	8090	2	105377172	ENST00000465795.1	22996	NA	LINC02077	long intergenic non-protein coding RNA 2077
chr6	56112846	56113186	341	*	Peak_24509	84	.	Intron (ENST00000488912.5/81578, intron 3 of 17)	6	56056590	56125608	69019	2	81578	ENST00000488912.5	12422	ENSG00000124749	COL21A1	collagen type XXI alpha 1 chain
chr6	101433082	101433401	320	*	Peak_24465	84	.	Intron (ENST00000421544.6/2898, intron 4 of 18)	6	101398793	101745143	346351	1	2898	ENST00000358361.7	34289	ENSG00000164418	GRIK2	glutamate ionotropic receptor kainate type subunit 2
chr10	67932463	67932793	331	*	Peak_23861	84	.	3' UTR	10	67954200	67956861	2662	2	26091	ENST00000480158.1	24068	ENSG00000148634	HERC4	HECT and RLD domain containing E3 ubiquitin protein ligase 4
chr16	22550771	22551053	283	*	Peak_24098	84	.	Intron (ENST00000550753.5/653786, intron 1 of 8)	16	22546964	22576682	29719	1	653786	ENST00000548889.1	3807	ENSG00000257838	OTOAP1	OTOA pseudogene 1
chr19	23125191	23125494	304	*	Peak_24169	84	.	Intron (ENST00000593635.1/100129543, intron 1 of 2)	19	23116975	23147219	30245	1	100129543	ENST00000597761.6	8216	ENSG00000183850	ZNF730	zinc finger protein 730
chr9	98329366	98329695	330	*	Peak_24665	84	.	Intron (ENST00000259455.3/9568, intron 13 of 18)	9	98304178	98306571	2394	2	9568	ENST00000634354.1	-22795	ENSG00000136928	GABBR2	gamma-aminobutyric acid type B receptor subunit 2
chr16	9503397	9503690	294	*	Peak_24120	84	.	Intron (ENST00000570038.1/ENST00000570038.1, intron 3 of 5)	16	9446010	9455505	9496	2	104266959	ENST00000570118.1	-47892	ENSG00000261075	LINC01195	long intergenic non-protein coding RNA 1195
chr9	108902601	108903014	414	*	Peak_24741	84	.	Exon (ENST00000374647.9/8518, exon 16 of 37)	9	108867517	108893083	25567	2	8518	ENST00000495759.5	-9518	ENSG00000070061	ELP1	elongator complex protein 1
chr17	4407093	4407376	284	*	Peak_24763	84	.	Distal Intergenic	17	4433688	4488208	54521	1	201305	ENST00000355530.6	-26312	ENSG00000182557	SPNS3	sphingolipid transporter 3 (putative)
chr21	44432973	44433509	537	*	Peak_24771	84	.	Intron (ENST00000300482.9/7226, intron 28 of 32)	21	44425556	44441874	16319	1	7226	ENST00000490982.1	7417	ENSG00000142185	TRPM2	transient receptor potential cation channel subfamily M member 2
chr12	52270762	52271068	307	*	Peak_24810	84	.	Intron (ENST00000553310.6/3892, intron 1 of 2)	12	52274675	52309163	34489	1	3892	ENST00000423955.6	-3607	ENSG00000170442	KRT86	keratin 86
chr22	17131194	17131577	384	*	Peak_24842	84	.	Intron (ENST00000441544.2/100996342, intron 3 of 3)	22	17121595	17132104	10510	1	100996342	ENST00000441544.2	9599	ENSG00000235478	LINC01664	long intergenic non-protein coding RNA 1664
chr19	41169089	41169440	352	*	Peak_24967	83	.	Distal Intergenic	19	41193049	41207539	14491	1	29785	ENST00000310054.8	-23609	ENSG00000167600	CYP2S1	cytochrome P450 family 2 subfamily S member 1
chr1	151817550	151817829	280	*	Peak_25191	82	.	Promoter (2-3kb)	1	151806958	151814789	7832	2	6097	ENST00000480719.1	-2761	ENSG00000143365	RORC	RAR related orphan receptor C
chr20	61609441	61609760	320	*	Peak_25214	82	.	Intron (ENST00000614565.4/1002, intron 2 of 15)	20	61599761	61937249	337489	1	1002	ENST00000543233.2	9680	ENSG00000179242	CDH4	cadherin 4
chr5	81889136	81889417	282	*	Peak_25349	82	.	Distal Intergenic	5	81972025	82148117	176093	1	83734	ENST00000355178.8	-82608	ENSG00000152348	ATG10	autophagy related 10
chr1	54894668	54895211	544	*	Peak_25345	82	.	Distal Intergenic	1	54849627	54887271	37645	2	1718	ENST00000649007.1	-7397	ENSG00000116133	DHCR24	24-dehydrocholesterol reductase
chr1	111784867	111785316	450	*	Peak_25340	82	.	Intron (ENST00000369697.5/3752, intron 2 of 5)	1	111762417	111765830	3414	1	11218	ENST00000534200.1	22450	ENSG00000064703	DDX20	DEAD-box helicase 20
chr1	14774030	14774381	352	*	Peak_25361	82	.	Intron (ENST00000636203.1/23254, intron 3 of 16)	1	14924130	15068152	144023	1	23254	ENST00000361144.9	-149749	ENSG00000189337	KAZN	kazrin, periplakin interacting protein
chr17	65118116	65118837	722	*	Peak_25388	81	.	Intron (ENST00000637818.1/100507002, intron 4 of 4)	17	65100986	65227690	126705	1	8787	ENST00000635833.1	17130	ENSG00000108370	RGS9	regulator of G protein signaling 9
chr3	7760425	7760703	279	*	Peak_25610	81	.	Distal Intergenic	3	7520138	7560333	40196	2	100873937	ENST00000427273.1	-200092	ENSG00000236202	GRM7-AS1	GRM7 antisense RNA 1
chr6	55790447	55791148	702	*	Peak_25640	81	.	Intron (ENST00000370830.3/653, intron 3 of 6)	6	55753645	55875564	121920	2	653	ENST00000370830.3	84416	ENSG00000112175	BMP5	bone morphogenetic protein 5
chr2	165061128	165061635	508	*	Peak_25583	81	.	Intron (ENST00000638199.1/101929633, intron 6 of 7)	2	165092256	165093828	1573	2	6328	ENST00000465043.1	32193	ENSG00000153253	SCN3A	sodium voltage-gated channel alpha subunit 3
chr19	48016104	48016437	334	*	Peak_25572	81	.	Promoter (<=1kb)	19	48015893	48025134	9242	1	64100	ENST00000593782.1	211	ENSG00000169393	ELSPBP1	epididymal sperm binding protein 1
chr14	49761521	49762344	824	*	Peak_25526	81	.	Distal Intergenic	14	49767608	49786385	18778	1	23588	ENST00000298307.9	-5264	ENSG00000165516	KLHDC2	kelch domain containing 2
chr20	49871314	49871673	360	*	Peak_25684	81	.	Intron (ENST00000417961.5/23315, intron 10 of 15)	20	49886371	49892242	5872	1	23315	ENST00000490250.1	-14698	ENSG00000197818	SLC9A8	solute carrier family 9 member A8
chr19	42006384	42006820	437	*	Peak_25712	81	.	Promoter (2-3kb)	19	41999243	42003764	4522	2	2901	ENST00000602210.1	-2620	ENSG00000105737	GRIK5	glutamate ionotropic receptor kainate type subunit 5
chr15	60082978	60083216	239	*	Peak_25723	81	.	Intron (ENST00000560503.2/ENST00000560503.2, intron 1 of 2)	15	60004234	60061730	57497	1	27023	ENST00000560857.1	78744	ENSG00000171956	FOXB1	forkhead box B1
chr1	37149136	37149403	268	*	Peak_25746	80	.	Distal Intergenic	1	37161563	37161634	72	1	100422898	ENST00000579351.1	-12160	ENSG00000264698	MIR4255	microRNA 4255
chr11	71507319	71507614	296	*	Peak_25777	80	.	Intron (ENST00000527963.1/55191, intron 2 of 3)	11	71498402	71524107	25706	1	55191	ENST00000527963.1	8917	ENSG00000172890	NADSYN1	NAD synthetase 1
chr17	55256625	55257500	876	*	Peak_25835	80	.	Distal Intergenic	17	55265012	55325065	60054	1	3131	ENST00000226067.9	-7512	ENSG00000108924	HLF	HLF transcription factor, PAR bZIP family member
chr15	37979719	37980026	308	*	Peak_25849	80	.	Distal Intergenic	15	37935257	37951539	16283	1	145942	ENST00000319669.4	44462	ENSG00000166069	TMCO5A	transmembrane and coiled-coil domains 5A
chr5	100410233	100410555	323	*	Peak_25995	79	.	Distal Intergenic	5	100375700	100381398	5699	2	100133050	ENST00000621479.1	-28835	NA	LOC100133050	glucuronidase beta pseudogene
chr9	129814972	129815995	1024	*	Peak_26020	79	.	Promoter (2-3kb)	9	129813608	129818781	5174	2	1861	ENST00000474192.1	2786	ENSG00000136827	TOR1A	torsin family 1 member A
chr4	8181974	8182316	343	*	Peak_26046	79	.	Promoter (<=1kb)	4	8182072	8212829	30758	1	54436	ENST00000510763.5	0	ENSG00000125089	SH3TC1	SH3 domain and tetratricopeptide repeats 1
chr2	150713259	150713549	291	*	Peak_26240	78	.	Distal Intergenic	2	150629067	150634868	5802	1	101929282	ENST00000443811.1	84192	ENSG00000224048	LINC02612	long intergenic non-protein coding RNA 2612
chr2	197577431	197578146	716	*	Peak_26241	78	.	Intron (ENST00000295049.8/130132, intron 8 of 8)	2	197572006	197617895	45890	2	130132	ENST00000454447.1	39749	ENSG00000162944	RFTN2	raftlin family member 2
chr6	10587554	10587894	341	*	Peak_26279	78	.	Promoter (1-2kb)	6	10585746	10629368	43623	1	2651	ENST00000265012.4	1808	ENSG00000111846	GCNT2	glucosaminyl (N-acetyl) transferase 2 (I blood group)
chr14	21024698	21025125	428	*	Peak_26200	78	.	Promoter (<=1kb)	14	21016772	21025026	8255	2	57447	ENST00000555158.5	0	ENSG00000165795	NDRG2	NDRG family member 2
chr11	71150452	71151075	624	*	Peak_26175	78	.	Intron (ENST00000601538.5/22941, intron 1 of 24)	11	70952702	71094688	141987	2	22941	ENST00000458632.2	-55764	ENSG00000162105	SHANK2	SH3 and multiple ankyrin repeat domains 2
chr15	70286016	70286386	371	*	Peak_26328	78	.	Distal Intergenic	15	70047790	70098176	50387	2	7090	ENST00000558939.5	-187840	ENSG00000140332	TLE3	TLE family member 3, transcriptional corepressor
chr2	10160951	10161373	423	*	Peak_26377	78	.	Intron (ENST00000641498.1/6241, intron 11 of 11)	2	10142325	10146132	3808	1	348738	ENST00000642996.1	18626	ENSG00000171848	C2orf48	chromosome 2 open reading frame 48
chr17	18019167	18019499	333	*	Peak_26381	78	.	Promoter (1-2kb)	17	18018262	18021264	3003	2	91647	ENST00000467560.5	1765	ENSG00000171953	ATPAF2	ATP synthase mitochondrial F1 complex assembly factor 2
chr20	63674443	63675082	640	*	Peak_26402	78	.	Intron (ENST00000370018.7/51750, intron 10 of 34)	20	63682537	63686050	3514	1	51750	ENST00000647249.1	-7455	ENSG00000258366	RTEL1	regulator of telomere elongation helicase 1
chr14	76858557	76859105	549	*	Peak_26421	78	.	Intron (ENST00000393774.7/145497, intron 10 of 13)	14	76826387	76844472	18086	1	145497	ENST00000460005.1	32170	ENSG00000100565	LRRC74A	leucine rich repeat containing 74A
chr2	112900317	112900702	386	*	Peak_26493	77	.	Distal Intergenic	2	112912971	112918882	5912	1	27178	ENST00000263326.7	-12269	ENSG00000125571	IL37	interleukin 37
chr14	55414532	55414853	322	*	Peak_26491	77	.	Promoter (2-3kb)	14	55366392	55411858	45467	2	22863	ENST00000247178.5	-2674	ENSG00000126775	ATG14	autophagy related 14
chr11	69373060	69374081	1022	*	Peak_26658	77	.	Distal Intergenic	11	69425690	69429621	3932	1	102724265	ENST00000545202.1	-51609	ENSG00000255980	LOC102724265	uncharacterized LOC102724265
chr17	76476451	76477496	1046	*	Peak_26711	77	.	Promoter (<=1kb)	17	76470891	76477731	6841	2	79651	ENST00000590168.5	235	ENSG00000129667	RHBDF2	rhomboid 5 homolog 2
chr20	49882115	49882671	557	*	Peak_26793	77	.	Intron (ENST00000417961.5/23315, intron 13 of 15)	20	49886371	49892242	5872	1	23315	ENST00000490250.1	-3700	ENSG00000197818	SLC9A8	solute carrier family 9 member A8
chr3	5246546	5246892	347	*	Peak_26843	77	.	Distal Intergenic	3	5250177	5250255	79	2	100616334	ENST00000577799.1	3363	ENSG00000265180	MIR4790	microRNA 4790
chr17	53608384	53608655	272	*	Peak_26855	77	.	Intron (ENST00000650577.1/ENST00000650577.1, intron 4 of 6)	17	53822901	53825213	2313	1	84643	ENST00000268919.5	-214246	ENSG00000141200	KIF2B	kinesin family member 2B
chr1	44682246	44682651	406	*	Peak_26854	77	.	Intron (ENST00000424484.5/339541, intron 1 of 5)	1	44689834	44724380	34547	1	339541	ENST00000434068.1	-7183	ENSG00000198520	ARMH1	armadillo like helical domain containing 1
chr1	31877554	31878029	476	*	Peak_26913	76	.	Intron (ENST00000602889.1/ENST00000602889.1, intron 1 of 1)	1	31908653	31911280	2628	2	8073	ENST00000489313.1	33251	ENSG00000184007	PTP4A2	protein tyrosine phosphatase 4A2
chr17	73201178	73201721	544	*	Peak_26920	76	.	Exon (ENST00000618996.4/9382, exon 8 of 16)	17	73205136	73206188	1053	1	9382	ENST00000577844.1	-3415	ENSG00000166685	COG1	component of oligomeric golgi complex 1
chr3	147100016	147100470	455	*	Peak_27690	76	.	Intron (ENST00000473299.1/ENST00000473299.1, intron 3 of 5)	3	146921963	146925218	3256	1	101927866	ENST00000471638.1	178053	ENSG00000242671	LINC02010	long intergenic non-protein coding RNA 2010
chr2	169157576	169157812	237	*	Peak_27559	76	.	Intron (ENST00000649046.1/4036, intron 63 of 78)	2	169127829	169173964	46136	2	4036	ENST00000650252.1	16152	ENSG00000081479	LRP2	LDL receptor related protein 2
chr11	110363198	110363475	278	*	Peak_27020	76	.	Intron (ENST00000526605.5/105369486, intron 1 of 2)	11	110355199	110381986	26788	1	105369486	ENST00000526703.1	7999	NA	LOC105369486	uncharacterized LOC105369486
chr10	66947005	66947277	273	*	Peak_26993	76	.	Intron (ENST00000361320.4/347731, intron 2 of 2)	10	66926006	67099830	173825	1	347731	ENST00000361320.4	20999	ENSG00000198739	LRRTM3	leucine rich repeat transmembrane neuronal 3
chr2	214844739	214845054	316	*	Peak_27584	76	.	Promoter (1-2kb)	2	214846947	214847081	135	1	109617008	ENST00000384544.1	-1893	ENSG00000207274	SNORA70I	small nucleolar RNA, H/ACA box 70I
chr9	27089772	27090343	572	*	Peak_28128	76	.	Distal Intergenic	9	27109141	27229687	120547	1	7010	ENST00000519097.5	-18798	ENSG00000120156	TEK	TEK receptor tyrosine kinase
chrX	16775944	16776263	320	*	Peak_28189	76	.	Distal Intergenic	23	16786427	16844519	58093	1	55787	ENST00000380122.9	-10164	ENSG00000086712	TXLNG	taxilin gamma
chr12	80708596	80708945	350	*	Peak_27162	76	.	Promoter (1-2kb)	12	80707498	80709474	1977	1	4618	ENST00000228641.3	1098	ENSG00000111046	MYF6	myogenic factor 6
chr2	54287876	54288228	353	*	Peak_27640	76	.	Intron (ENST00000607452.5/98, intron 6 of 6)	2	54253184	54256272	3089	2	388951	ENST00000317802.8	-31604	ENSG00000178021	TSPYL6	TSPY like 6
chr15	78814820	78815133	314	*	Peak_27324	76	.	Intron (ENST00000379535.8/10933, intron 1 of 12)	15	78759203	78811431	52229	2	11173	ENST00000388820.4	-3389	ENSG00000136378	ADAMTS7	ADAM metallopeptidase with thrombospondin type 1 motif 7
chr14	102385624	102385923	300	*	Peak_27236	76	.	Intron (ENST00000359520.11/9895, intron 2 of 19)	14	102363079	102465671	102593	1	9895	ENST00000558678.1	22545	ENSG00000196663	TECPR2	tectonin beta-propeller repeat containing 2
chr1	204585269	204585617	349	*	Peak_27095	76	.	Distal Intergenic	1	204542789	204549388	6600	1	4194	ENST00000444261.1	42480	ENSG00000198625	MDM4	MDM4 regulator of p53
chr7	40893657	40893972	316	*	Peak_28020	76	.	Distal Intergenic	7	40808157	40860509	52353	1	79783	ENST00000460466.1	85500	ENSG00000175600	SUGCT	succinyl-CoA:glutarate-CoA transferase
chr18	69853246	69853535	290	*	Peak_27429	76	.	3' UTR	18	69831158	69895809	64652	2	10666	ENST00000578928.1	42274	ENSG00000150637	CD226	CD226 molecule
chr8	16600541	16600964	424	*	Peak_28071	76	.	Intron (ENST00000649038.1/ENST00000649038.1, intron 8 of 8)	8	16175263	16567362	392100	2	4481	ENST00000518026.5	-33179	ENSG00000038945	MSR1	macrophage scavenger receptor 1
chr12	94503699	94504126	428	*	Peak_27171	76	.	Distal Intergenic	12	94460003	94462484	2482	1	144486	ENST00000623122.1	43696	ENSG00000278916	CEP83-DT	CEP83 divergent transcript
chr7	155557896	155558197	302	*	Peak_28245	76	.	Promoter (2-3kb)	7	155502014	155555450	53437	2	285888	ENST00000636372.1	-2446	ENSG00000146910	CNPY1	canopy FGF signaling regulator 1
chr19	55066187	55066476	290	*	Peak_28241	76	.	Promoter (1-2kb)	19	55063041	55064368	1328	2	112724	ENST00000591603.1	-1819	ENSG00000160439	RDH13	retinol dehydrogenase 13
chr5	11302850	11303184	335	*	Peak_28339	76	.	Intron (ENST00000304623.12/1501, intron 9 of 21)	5	10972532	11384771	412240	2	1501	ENST00000495388.6	81587	ENSG00000169862	CTNND2	catenin delta 2
chr2	18065080	18065352	273	*	Peak_28335	76	.	Intron (ENST00000465292.5/3790, intron 2 of 4)	2	17879383	17931231	51849	1	3790	ENST00000419802.1	185697	ENSG00000170745	KCNS3	potassium voltage-gated channel modifier subfamily S member 3
chr22	21060484	21060859	376	*	Peak_28367	76	.	Exon (ENST00000497328.5/400891, exon 8 of 9)	22	21056530	21060397	3868	1	400891	ENST00000469766.1	3954	ENSG00000187905	LRRC74B	leucine rich repeat containing 74B
chr3	187761878	187762316	439	*	Peak_28418	76	.	Distal Intergenic	3	187721377	187745727	24351	2	604	ENST00000406870.6	-16151	ENSG00000113916	BCL6	BCL6 transcription repressor
chr7	101663528	101663841	314	*	Peak_28420	76	.	Distal Intergenic	7	101613325	101629296	15972	2	93408	ENST00000223167.4	-34232	ENSG00000106436	MYL10	myosin light chain 10
chr1	39914084	39914500	417	*	Peak_28437	76	.	Distal Intergenic	1	39901134	39902256	1123	2	4610	ENST00000450953.3	-11828	ENSG00000116990	MYCL	MYCL proto-oncogene, bHLH transcription factor
chr5	139874220	139874489	270	*	Peak_28443	76	.	Promoter (2-3kb)	5	139869399	139871803	2405	2	9542	ENST00000519478.1	-2417	ENSG00000158458	NRG2	neuregulin 2
chr1	28686802	28687146	345	*	Peak_28509	75	.	Intron (ENST00000373816.5/10691, intron 2 of 9)	1	28683564	28715065	31502	1	10691	ENST00000480454.1	3238	ENSG00000162419	GMEB1	glucocorticoid modulatory element binding protein 1
chr13	29121393	29121913	521	*	Peak_28554	75	.	Intron (ENST00000612955.4/23281, intron 5 of 15)	13	29071984	29281770	209787	1	23281	ENST00000255289.5	49409	ENSG00000132938	MTUS2	microtubule associated scaffold protein 2
chr12	105550473	105550789	317	*	Peak_28551	75	.	Distal Intergenic	12	105704203	105744062	39860	1	101929110	ENST00000548557.1	-153414	ENSG00000257859	CASC18	cancer susceptibility 18
chr11	45643043	45643327	285	*	Peak_28587	75	.	Distal Intergenic	11	45651233	45665594	14362	2	8534	ENST00000531322.1	22267	ENSG00000175264	CHST1	carbohydrate sulfotransferase 1
chr8	80374726	80375033	308	*	Peak_28688	75	.	Intron (ENST00000644465.1/ENST00000644465.1, intron 2 of 4)	8	80485619	80519804	34186	1	65986	ENST00000379091.8	-110586	ENSG00000205189	ZBTB10	zinc finger and BTB domain containing 10
chr6	31092974	31093316	343	*	Peak_28692	75	.	Distal Intergenic	6	31111223	31112559	1337	2	29113	ENST00000259870.3	19243	ENSG00000204542	C6orf15	chromosome 6 open reading frame 15
chr4	6489228	6489758	531	*	Peak_28720	74	.	Intron (ENST00000506140.5/5522, intron 2 of 9)	4	6323056	6472446	149391	2	5522	ENST00000382599.8	-16782	ENSG00000074211	PPP2R2C	protein phosphatase 2 regulatory subunit Bgamma
chr12	123477051	123477371	321	*	Peak_28706	74	.	Intron (ENST00000376874.8/353116, intron 6 of 6)	12	123472167	123484974	12808	2	353116	ENST00000544468.1	7603	ENSG00000188026	RILPL1	Rab interacting lysosomal protein like 1
chr11	95973820	95974059	240	*	Peak_28748	74	.	Downstream (2-3kb)	11	95887610	95925270	37661	2	8898	ENST00000470011.5	-48550	ENSG00000087053	MTMR2	myotubularin related protein 2
chr3	11667062	11667348	287	*	Peak_28770	74	.	Intron (ENST00000273038.7/9686, intron 2 of 5)	3	11558476	11643924	85449	2	9686	ENST00000430365.6	-23138	ENSG00000144560	VGLL4	vestigial like family member 4
chr17	41437951	41438283	333	*	Peak_28778	74	.	Promoter (2-3kb)	17	41436446	41440921	4476	2	8687	ENST00000246646.3	2638	ENSG00000171360	KRT38	keratin 38
chr15	40353770	40354126	357	*	Peak_28816	74	.	Promoter (2-3kb)	15	40351033	40356434	5402	1	644844	ENST00000448599.2	2737	ENSG00000233041	PHGR1	proline, histidine and glycine rich 1
chr19	47066557	47067385	829	*	Peak_28849	74	.	Exon (ENST00000253048.9/23211, exon 15 of 15)	19	47045907	47048630	2724	2	54958	ENST00000253047.6	-17927	ENSG00000130748	TMEM160	transmembrane protein 160
chr19	49099847	49100155	309	*	Peak_29004	74	.	Promoter (2-3kb)	19	49102411	49108602	6192	1	6625	ENST00000544278.2	-2256	ENSG00000104852	SNRNP70	small nuclear ribonucleoprotein U1 subunit 70
chr3	3907741	3908065	325	*	Peak_29060	74	.	Intron (ENST00000448413.5/285362, intron 9 of 12)	3	3700814	3800875	100062	2	100130207	ENST00000470751.5	-106866	ENSG00000144455	LOC100130207	uncharacterized LOC100130207
chr1	89004524	89004810	287	*	Peak_28997	74	.	Downstream (1-2kb)	1	89008844	89011835	2992	2	2635	ENST00000461384.6	7025	ENSG00000117226	GBP3	guanylate binding protein 3
chr17	43992964	43993290	327	*	Peak_28982	74	.	Intron (ENST00000360085.6/5697, intron 1 of 6)	17	43952738	44004469	51732	2	5697	ENST00000360085.6	11179	ENSG00000131096	PYY	peptide YY
chr17	74023094	74023500	407	*	Peak_28988	74	.	Distal Intergenic	17	74203582	74209880	6299	1	6169	ENST00000439590.6	-180082	ENSG00000172809	RPL38	ribosomal protein L38
chr20	44672287	44672721	435	*	Peak_29012	74	.	Intron (ENST00000415889.2/79015, intron 2 of 5)	20	44656451	44663498	7048	2	79015	ENST00000255183.8	-8789	ENSG00000283440	LINC01260	long intergenic non-protein coding RNA 1260
chr2	37173748	37174239	492	*	Peak_29326	73	.	Intron (ENST00000535679.5/391365, intron 5 of 6)	2	37167820	37188640	20821	2	391365	ENST00000535679.5	14401	ENSG00000138068	SULT6B1	sulfotransferase family 6B member 1
chr6	111968272	111968731	460	*	Peak_29329	73	.	Distal Intergenic	6	111900489	111901851	1363	2	105377946	ENST00000449069.2	-66421	NA	LINC02527	long intergenic non-protein coding RNA 2527
chr18	51125445	51125857	413	*	Peak_29381	73	.	Distal Intergenic	18	51077251	51078870	1620	1	4089	ENST00000586253.1	48194	ENSG00000141646	SMAD4	SMAD family member 4
chr17	49238835	49239349	515	*	Peak_29404	73	.	Distal Intergenic	17	49224439	49230766	6328	2	162466	ENST00000511066.5	-8069	ENSG00000173868	PHOSPHO1	phosphoethanolamine/phosphocholine phosphatase
chr17	41707761	41708243	483	*	Peak_29424	73	.	Distal Intergenic	17	41712326	41715969	3644	1	2520	ENST00000329402.3	-4083	ENSG00000184502	GAST	gastrin
chr1	54743913	54744212	300	*	Peak_29420	73	.	Distal Intergenic	1	54736689	54742307	5619	1	7268	ENST00000486091.1	7224	ENSG00000243725	TTC4	tetratricopeptide repeat domain 4
chr16	1176089	1176421	333	*	Peak_29468	73	.	Intron (ENST00000348261.10/8912, intron 2 of 34)	16	1195029	1198934	3906	1	8912	ENST00000564954.1	-18608	ENSG00000196557	CACNA1H	calcium voltage-gated channel subunit alpha1 H
chr2	36805126	36805468	343	*	Peak_29518	73	.	Exon (ENST00000379242.7/5212, exon 14 of 16)	2	36773812	36788054	14243	1	5212	ENST00000464309.1	31314	ENSG00000205221	VIT	vitrin
chr17	51784139	51784534	396	*	Peak_29512	73	.	Intron (ENST00000570565.5/56934, intron 3 of 8)	17	51635855	51748544	112690	2	56934	ENST00000571918.1	-35595	ENSG00000154975	CA10	carbonic anhydrase 10
chr12	123000137	123000450	314	*	Peak_29564	72	.	3' UTR	12	122997438	123006120	8683	2	57605	ENST00000436074.6	5670	ENSG00000090975	PITPNM2	phosphatidylinositol transfer protein membrane associated 2
chr19	33456946	33457415	470	*	Peak_29604	72	.	Intron (ENST00000244137.11/5184, intron 9 of 14)	19	33391423	33478084	86662	2	5184	ENST00000588328.5	20669	ENSG00000124299	PEPD	peptidase D
chr19	48524339	48524707	369	*	Peak_29605	72	.	Distal Intergenic	19	48485773	48513935	28163	2	114783	ENST00000650440.1	-10404	ENSG00000142235	LMTK3	lemur tyrosine kinase 3
chr11	14194063	14194431	369	*	Peak_29636	72	.	Intron (ENST00000576479.3/10418, intron 6 of 15)	11	14262447	14265999	3553	1	10418	ENST00000591785.1	-68016	ENSG00000262655	SPON1	spondin 1
chr5	179497880	179498411	532	*	Peak_29651	72	.	Distal Intergenic	5	179550558	179610026	59469	1	80230	ENST00000319449.8	-52147	ENSG00000176783	RUFY1	RUN and FYVE domain containing 1
chr5	98810232	98810593	362	*	Peak_29653	72	.	Distal Intergenic	5	98779845	98798643	18799	1	285704	ENST00000508978.1	30387	ENSG00000174136	RGMB	repulsive guidance molecule BMP co-receptor b
chr21	38356657	38357059	403	*	Peak_29648	72	.	Distal Intergenic	21	38326352	38333421	7070	2	102724678	ENST00000436845.1	-23236	NA	LINC01423	long intergenic non-protein coding RNA 1423
chr1	4123589	4123938	350	*	Peak_29710	72	.	Distal Intergenic	1	3947149	3948980	1832	2	105376672	ENST00000425194.1	-174609	ENSG00000226374	LINC01345	long intergenic non-protein coding RNA 1345
chr19	1014164	1014538	375	*	Peak_29750	72	.	Promoter (<=1kb)	19	1011866	1014247	2382	2	91304	ENST00000589055.3	0	ENSG00000182087	TMEM259	transmembrane protein 259
chr13	35646357	35646852	496	*	Peak_29704	72	.	Intron (ENST00000400445.7/26960, intron 50 of 57)	13	35697524	35699001	1478	1	100507114	ENST00000422430.1	-50672	ENSG00000236036	LINC00445	long intergenic non-protein coding RNA 445
chr14	104602371	104603032	662	*	Peak_29709	72	.	Promoter (1-2kb)	14	104594282	104604741	10460	2	388021	ENST00000615704.1	1709	ENSG00000258986	TMEM179	transmembrane protein 179
chr17	80492685	80493478	794	*	Peak_29742	72	.	Distal Intergenic	17	80473414	80477843	4430	2	4884	ENST00000575212.1	-14842	ENSG00000171246	NPTX1	neuronal pentraxin 1
chr20	54116174	54116681	508	*	Peak_29775	72	.	Distal Intergenic	20	54154370	54157298	2929	2	1591	ENST00000460643.1	40617	ENSG00000019186	CYP24A1	cytochrome P450 family 24 subfamily A member 1
chr12	49103068	49103406	339	*	Peak_30029	72	.	Promoter (<=1kb)	12	49101103	49103120	2018	2	55716	ENST00000552879.5	0	ENSG00000139636	LMBR1L	limb development membrane protein 1 like
chr6	148448572	148449010	439	*	Peak_30041	72	.	Intron (ENST00000367467.7/23328, intron 4 of 19)	6	148440377	148519762	79386	1	23328	ENST00000637469.1	8195	ENSG00000111961	SASH1	SAM and SH3 domain containing 1
chr9	130666289	130666598	310	*	Peak_30321	71	.	Promoter (1-2kb)	9	130664594	130682981	18388	1	59335	ENST00000253008.2	1695	ENSG00000130711	PRDM12	PR/SET domain 12
chr8	22691323	22691645	323	*	Peak_30316	71	.	Promoter (<=1kb)	8	22691165	22692224	1060	2	1960	ENST00000518773.1	579	ENSG00000179388	EGR3	early growth response 3
chr22	37074414	37074883	470	*	Peak_30281	71	.	Exon (ENST00000346753.8/164656, exon 12 of 18)	22	37082850	37084825	1976	2	164656	ENST00000429068.1	9942	ENSG00000187045	TMPRSS6	transmembrane serine protease 6
chr11	1653613	1654012	400	*	Peak_30219	71	.	Distal Intergenic	11	1665597	1667856	2260	1	387742	ENST00000382167.2	-11585	ENSG00000205866	FAM99A	family with sequence similarity 99 member A
chr19	45976320	45976674	355	*	Peak_30341	71	.	Promoter (2-3kb)	19	45933734	45973546	39813	2	4858	ENST00000263257.5	-2774	ENSG00000104967	NOVA2	NOVA alternative splicing regulator 2
chr1	18001370	18001864	495	*	Peak_30457	71	.	Distal Intergenic	1	18065657	18074412	8756	1	101927876	ENST00000569711.1	-63793	ENSG00000261781	LINC01654	long intergenic non-protein coding RNA 1654
chr11	1178164	1178616	453	*	Peak_30475	71	.	Exon (ENST00000621226.2/4586, exon 25 of 49)	11	1157953	1201138	43186	1	4586	ENST00000621226.2	20211	ENSG00000215182	MUC5AC	mucin 5AC, oligomeric mucus/gel-forming
chr1	37658615	37658919	305	*	Peak_30543	71	.	Distal Intergenic	1	37611639	37634923	23285	2	284654	ENST00000356545.6	-23692	ENSG00000169218	RSPO1	R-spondin 1
chr4	1762526	1763049	524	*	Peak_30563	71	.	Distal Intergenic	4	1744439	1745076	638	1	10460	ENST00000484264.1	18087	ENSG00000013810	TACC3	transforming acidic coiled-coil containing protein 3
chr1	1354182	1354870	689	*	Peak_30558	71	.	Promoter (<=1kb)	1	1352689	1354264	1576	2	54587	ENST00000474033.5	0	ENSG00000162576	MXRA8	matrix remodeling associated 8
chr19	5750633	5751149	517	*	Peak_30575	70	.	Promoter (2-3kb)	19	5753511	5778734	25224	1	257062	ENST00000309164.11	-2362	ENSG00000174898	CATSPERD	cation channel sperm associated auxiliary subunit delta
chr2	171630367	171630662	296	*	Peak_30659	70	.	Distal Intergenic	2	171687409	171726081	38673	1	1781	ENST00000452242.5	-56747	ENSG00000077380	DYNC1I2	dynein cytoplasmic 1 intermediate chain 2
chr5	135877384	135877690	307	*	Peak_30749	70	.	Promoter (2-3kb)	5	135880029	135883450	3422	1	153328	ENST00000471980.1	-2339	ENSG00000145832	SLC25A48	solute carrier family 25 member 48
chr1	26205491	26206084	594	*	Peak_30745	70	.	Distal Intergenic	1	26209741	26227840	18100	1	101928303	ENST00000428812.1	-3657	ENSG00000236155	LOC101928303	uncharacterized LOC101928303
chr16	56648045	56648358	314	*	Peak_30832	70	.	Promoter (<=1kb)	16	56648881	56652636	3756	1	4490	ENST00000568608.1	-523	ENSG00000169688	MT1B	metallothionein 1B
chr9	136197965	136198812	848	*	Peak_30846	70	.	Promoter (2-3kb)	9	136196252	136201674	5423	2	8022	ENST00000619587.1	2862	ENSG00000107187	LHX3	LIM homeobox 3
chr17	64955663	64955999	337	*	Peak_31023	69	.	Intron (ENST00000413214.3/ENST00000413214.3, intron 1 of 1)	17	64968222	64973517	5296	2	201283	ENST00000565833.1	17518	ENSG00000214174	AMZ2P1	archaelysin family metallopeptidase 2 pseudogene 1
chr9	37160661	37160962	302	*	Peak_31086	69	.	Intron (ENST00000336755.9/84186, intron 2 of 8)	9	37144932	37356980	212049	1	84186	ENST00000488607.5	15729	ENSG00000147905	ZCCHC7	zinc finger CCHC-type containing 7
chr17	52098161	52098504	344	*	Peak_31072	69	.	Intron (ENST00000570565.5/56934, intron 1 of 8)	17	51630320	52158063	527744	2	56934	ENST00000571371.5	59559	ENSG00000154975	CA10	carbonic anhydrase 10
chr17	38660021	38660279	259	*	Peak_31071	69	.	Distal Intergenic	17	38671703	38675421	3719	2	100170841	ENST00000621654.1	15142	ENSG00000273604	EPOP	elongin BC and polycomb repressive complex 2 associated protein
chr7	97952369	97952657	289	*	Peak_32621	69	.	Intron (ENST00000641390.1/107986827, intron 1 of 17)	7	97963658	97963726	69	1	100847066	ENST00000580523.1	-11001	ENSG00000266318	MIR5692A1	microRNA 5692a-1
chr14	61367418	61367890	473	*	Peak_31526	69	.	Intron (ENST00000555185.5/5583, intron 1 of 3)	14	61361074	61449247	88174	1	5583	ENST00000556164.5	6344	ENSG00000027075	PRKCH	protein kinase C eta
chr10	13420194	13420515	322	*	Peak_31156	69	.	Intron (ENST00000448272.1/ENST00000448272.1, intron 1 of 1)	10	13442980	13452614	9635	2	222389	ENST00000480703.1	32099	ENSG00000165626	BEND7	BEN domain containing 7
chr4	24777798	24778087	290	*	Peak_32275	69	.	Distal Intergenic	4	24789912	24799683	9772	1	6649	ENST00000598411.1	-11825	ENSG00000109610	SOD3	superoxide dismutase 3
chr15	75750955	75751246	292	*	Peak_31609	69	.	Intron (ENST00000565686.1/ENST00000565686.1, intron 2 of 2)	15	75762215	75762315	101	2	100423035	ENST00000580760.1	11069	ENSG00000284385	MIR4313	microRNA 4313
chr4	56184397	56184758	362	*	Peak_32299	69	.	Intron (ENST00000629263.2/57482, intron 2 of 4)	4	56170195	56328625	158431	1	57482	ENST00000264229.11	14202	ENSG00000109265	KIAA1211	KIAA1211
chr2	237538787	237539199	413	*	Peak_32006	69	.	Promoter (1-2kb)	2	237540449	237553722	13274	1	79083	ENST00000432475.5	-1250	ENSG00000115648	MLPH	melanophilin
chr9	126017301	126017659	359	*	Peak_32722	69	.	Distal Intergenic	9	125865271	125935531	70261	1	5090	ENST00000428092.1	152030	ENSG00000167081	PBX3	PBX homeobox 3
chr9	1685196	1685449	254	*	Peak_32730	69	.	Distal Intergenic	9	1980290	2029051	48762	1	6595	ENST00000637383.1	-294841	ENSG00000080503	SMARCA2	SWI/SNF related, matrix associated, actin dependent regulator of chromatin, subfamily a, member 2
chr20	12379834	12380170	337	*	Peak_31831	69	.	Exon (ENST00000414718.1/ENST00000414718.1, exon 1 of 1)	20	11921566	11923130	1565	1	22903	ENST00000473180.1	458268	ENSG00000132640	BTBD3	BTB domain containing 3
chr12	131793063	131793478	416	*	Peak_31354	69	.	Promoter (2-3kb)	12	131796118	131799682	3565	1	6433	ENST00000537582.1	-2640	ENSG00000061936	SFSWAP	splicing factor SWAP
chr10	70945750	70946021	272	*	Peak_31194	69	.	Intron (ENST00000646051.1/ENST00000646051.1, intron 1 of 4)	10	70939133	70944144	5012	1	105378349	ENST00000558852.2	6617	ENSG00000259267	LINC02622	long intergenic non-protein coding RNA 2622
chr19	46010562	46010888	327	*	Peak_31816	69	.	Intron (ENST00000536603.5/729440, intron 5 of 9)	19	46003006	46018392	15387	1	729440	ENST00000594087.1	7556	ENSG00000104983	CCDC61	coiled-coil domain containing 61
chr2	203607792	203608171	380	*	Peak_31964	69	.	Distal Intergenic	2	203433682	203535410	101729	2	65059	ENST00000319170.9	-72382	ENSG00000173166	RAPH1	Ras association (RalGDS/AF-6) and pleckstrin homology domains 1
chr20	39207195	39207615	421	*	Peak_31847	69	.	Distal Intergenic	20	39213777	39224748	10972	2	339568	ENST00000412672.1	17133	ENSG00000230324	LINC01734	long intergenic non-protein coding RNA 1734
chr5	151434625	151435104	480	*	Peak_32351	69	.	Promoter (1-2kb)	5	151437046	151464578	27533	1	206358	ENST00000520111.5	-1942	ENSG00000123643	SLC36A1	solute carrier family 36 member 1
chr6	81918027	81918404	378	*	Peak_32494	69	.	Intron (ENST00000418567.1/102724168, intron 2 of 2)	6	81845185	81933480	88296	2	102724168	ENST00000418567.1	15076	NA	LINC02542	long intergenic non-protein coding RNA 2542
chr11	43896952	43897382	431	*	Peak_31275	69	.	Promoter (<=1kb)	11	43897456	43899636	2181	1	729799	ENST00000534767.1	-74	ENSG00000213693	SEC14L1P1	SEC14 like 1 pseudogene 1
chr4	30524775	30525185	411	*	Peak_32277	69	.	Distal Intergenic	4	30720415	30732973	12559	1	5099	ENST00000361762.3	-195230	ENSG00000169851	PCDH7	protocadherin 7
chr10	106719035	106719516	482	*	Peak_31128	69	.	Intron (ENST00000263054.10/114815, intron 6 of 25)	10	106577182	106699358	122177	2	114815	ENST00000369698.5	-19677	ENSG00000108018	SORCS1	sortilin related VPS10 domain containing receptor 1
chr2	44488338	44488679	342	*	Peak_32050	69	.	Intron (ENST00000402247.5/79823, intron 3 of 3)	2	44372748	44550790	178043	1	79823	ENST00000428993.1	115590	ENSG00000143919	CAMKMT	calmodulin-lysine N-methyltransferase
chr6	128342328	128342596	269	*	Peak_32427	69	.	Intron (ENST00000368226.8/5796, intron 2 of 29)	6	128184432	128322181	137750	2	5796	ENST00000490332.2	-20147	ENSG00000152894	PTPRK	protein tyrosine phosphatase receptor type K
chr12	91753117	91753519	403	*	Peak_31432	69	.	Distal Intergenic	12	91988323	91993529	5207	2	256021	ENST00000551764.5	240010	ENSG00000257242	LINC01619	long intergenic non-protein coding RNA 1619
chr2	45834911	45835259	349	*	Peak_32051	69	.	Intron (ENST00000421201.1/5581, intron 2 of 2)	2	45697972	45852026	154055	1	5581	ENST00000497602.1	136939	ENSG00000171132	PRKCE	protein kinase C epsilon
chr6	37272614	37272869	256	*	Peak_32474	69	.	Intron (ENST00000373491.3/55633, intron 2 of 12)	6	37218170	37258155	39986	2	221468	ENST00000357219.3	-14459	ENSG00000172738	TMEM217	transmembrane protein 217
chr2	42042301	42042594	294	*	Peak_32048	69	.	Distal Intergenic	2	42048020	42058528	10509	1	91461	ENST00000294964.5	-5426	ENSG00000162878	PKDCC	protein kinase domain containing, cytoplasmic
chr2	83339172	83339618	447	*	Peak_32082	69	.	Distal Intergenic	2	83522814	83523502	689	1	101928031	ENST00000448431.1	-183196	ENSG00000232548	LINC01809	long intergenic non-protein coding RNA 1809
chr7	153049128	153049398	271	*	Peak_32548	69	.	Distal Intergenic	7	152810742	152855371	44630	1	57180	ENST00000479402.1	238386	ENSG00000133627	ACTR3B	actin related protein 3B
chr6	105330467	105330815	349	*	Peak_32906	68	.	Intron (ENST00000369110.7/5550, intron 8 of 14)	6	105322255	105323768	1514	2	5550	ENST00000448705.1	-6699	ENSG00000085377	PREP	prolyl endopeptidase
chr6	40456307	40456567	261	*	Peak_32942	68	.	Intron (ENST00000338305.6/57497, intron 1 of 2)	6	40378337	40379885	1549	1	732253	ENST00000448433.5	77970	ENSG00000204091	TDRG1	testis development related 1
chr19	16762446	16762712	267	*	Peak_32932	68	.	Intron (ENST00000518676.5/284434, intron 9 of 20)	19	16731198	16817598	86401	1	284434	ENST00000552788.1	31248	ENSG00000188039	NWD1	NACHT and WD repeat domain containing 1
chr1	151603010	151603261	252	*	Peak_32920	68	.	Distal Intergenic	1	151612006	151693618	81613	1	81609	ENST00000642376.1	-8745	ENSG00000143376	SNX27	sorting nexin 27
chr2	6996537	6997248	712	*	Peak_33015	68	.	Promoter (<=1kb)	2	6996749	7020577	23829	1	9781	ENST00000471060.1	0	ENSG00000151692	RNF144A	ring finger protein 144A
chr4	2169784	2170299	516	*	Peak_33057	68	.	Intron (ENST00000382865.5/353497, intron 11 of 23)	4	2071950	2179387	107438	2	353497	ENST00000511098.1	9088	ENSG00000130997	POLN	DNA polymerase nu
chr1	119748920	119749446	527	*	Peak_33085	68	.	Intron (ENST00000369406.7/3158, intron 9 of 9)	1	119739462	119744213	4752	1	26227	ENST00000482968.1	9458	ENSG00000092621	PHGDH	phosphoglycerate dehydrogenase
chr11	12302854	12303201	348	*	Peak_33236	67	.	Intron (ENST00000646065.1/9645, intron 29 of 34)	11	12286900	12359144	72245	1	84953	ENST00000643523.1	15954	ENSG00000133816	MICALCL	MICAL C-terminal like
chr5	87593648	87594012	365	*	Peak_33256	67	.	Distal Intergenic	5	87662042	87679147	17106	1	111082994	ENST00000504287.1	-68030	NA	LINC02488	long intergenic non-protein coding RNA 2488
chr5	76025065	76025300	236	*	Peak_33373	67	.	Distal Intergenic	5	76083172	76333956	250785	1	22987	ENST00000502798.6	-57872	ENSG00000122012	SV2C	synaptic vesicle glycoprotein 2C
chr8	80704209	80704869	661	*	Peak_33458	67	.	Intron (ENST00000327835.7/619279, intron 2 of 8)	8	80664842	80673339	8498	2	619279	ENST00000522040.5	-30870	ENSG00000164684	ZNF704	zinc finger protein 704
chr10	113152430	113152739	310	*	Peak_33496	67	.	Promoter (<=1kb)	10	113152414	113165961	13548	1	6934	ENST00000480888.1	16	ENSG00000148737	TCF7L2	transcription factor 7 like 2
chr4	39838419	39838885	467	*	Peak_33728	67	.	Intron (ENST00000303538.12/23244, intron 31 of 32)	4	39837012	39848561	11550	2	23244	ENST00000507766.1	9676	ENSG00000121892	PDS5A	PDS5 cohesin associated factor A
chr19	51092837	51093142	306	*	Peak_33644	67	.	Distal Intergenic	19	51077897	51084245	6349	2	43847	ENST00000391802.1	-8592	ENSG00000129437	KLK14	kallikrein related peptidase 14
chr15	96147360	96147799	440	*	Peak_33596	67	.	Intron (ENST00000619812.1/ENST00000619812.1, intron 1 of 3)	15	96118843	96135469	16627	2	644192	ENST00000620029.4	-11891	ENSG00000247809	NR2F2-AS1	NR2F2 antisense RNA 1
chr19	4752158	4752501	344	*	Peak_33642	67	.	Distal Intergenic	19	4769140	4772533	3394	1	284424	ENST00000317292.7	-16639	ENSG00000176840	MIR7-3HG	MIR7-3 host gene
chr15	49211235	49211649	415	*	Peak_33588	67	.	Intron (ENST00000559883.5/2585, intron 3 of 6)	15	49239220	49319707	80488	1	2585	ENST00000561014.1	-27571	ENSG00000156958	GALK2	galactokinase 2
chr3	190122452	190122794	343	*	Peak_33861	67	.	Promoter (<=1kb)	3	189956831	190122437	165607	2	55214	ENST00000427335.6	-15	ENSG00000090530	P3H2	prolyl 3-hydroxylase 2
chr21	31138656	31138933	278	*	Peak_33933	67	.	Intron (ENST00000286827.7/7074, intron 23 of 28)	21	31123939	31130306	6368	2	7074	ENST00000491927.1	-8350	ENSG00000156299	TIAM1	T cell lymphoma invasion and metastasis 1
chr17	40550490	40550724	235	*	Peak_33971	67	.	Distal Intergenic	17	40554330	40561013	6684	2	1236	ENST00000579344.1	10289	ENSG00000126353	CCR7	C-C motif chemokine receptor 7
chr1	153996303	153996639	337	*	Peak_33953	67	.	Intron (ENST00000368559.7/91181, intron 37 of 39)	1	153990921	153992146	1226	1	6232	ENST00000477151.2	5382	ENSG00000177954	RPS27	ribosomal protein S27
chr11	77258674	77259191	518	*	Peak_33954	67	.	Intron (ENST00000315938.4/220032, intron 9 of 15)	11	77216558	77287418	70861	2	220032	ENST00000315938.4	28227	ENSG00000178795	GDPD4	glycerophosphodiester phosphodiesterase domain containing 4
chr12	45208377	45208777	401	*	Peak_34129	66	.	Intron (ENST00000256692.5/51054, intron 1 of 2)	12	45215987	45421217	205231	1	196527	ENST00000426898.2	-7210	ENSG00000177119	ANO6	anoctamin 6
chr17	62641405	62641726	322	*	Peak_34138	66	.	Intron (ENST00000303375.9/9902, intron 1 of 29)	17	62627685	62676604	48920	1	9902	ENST00000584265.1	13720	ENSG00000011028	MRC2	mannose receptor C type 2
chr1	1045927	1046490	564	*	Peak_34163	66	.	Promoter (<=1kb)	1	1045399	1046349	951	1	375790	ENST00000479707.1	528	ENSG00000188157	AGRN	agrin
chr9	5861257	5861699	443	*	Peak_34229	66	.	Distal Intergenic	9	5784573	5833117	48545	2	79956	ENST00000339450.9	-28140	ENSG00000099219	ERMP1	endoplasmic reticulum metallopeptidase 1
chr3	47320262	47320563	302	*	Peak_34254	66	.	Intron (ENST00000433449.5/23276, intron 3 of 3)	3	47228395	47283451	55057	2	64147	ENST00000265529.7	-36811	ENSG00000088727	KIF9	kinesin family member 9
chr2	218256043	218256357	315	*	Peak_34252	66	.	Exon (ENST00000562328.2/ENST00000562328.2, exon 1 of 1)	2	218259496	218263859	4364	1	151306	ENST00000479077.5	-3139	ENSG00000179921	GPBAR1	G protein-coupled bile acid receptor 1
chr1	43536570	43536855	286	*	Peak_34306	66	.	Promoter (1-2kb)	1	43538198	43580078	41881	1	5792	ENST00000372405.1	-1343	ENSG00000142949	PTPRF	protein tyrosine phosphatase receptor type F
chr1	26243592	26243876	285	*	Peak_34315	66	.	Intron (ENST00000640292.2/64793, intron 2 of 12)	1	26234202	26278808	44607	1	64793	ENST00000252992.8	9390	ENSG00000130695	CEP85	centrosomal protein 85
chr5	180216737	180217022	286	*	Peak_34340	66	.	Distal Intergenic	5	180100791	180209153	108363	2	255426	ENST00000361132.8	-7584	ENSG00000146090	RASGEF1C	RasGEF domain family member 1C
chr19	1544297	1544577	281	*	Peak_34431	66	.	Distal Intergenic	19	1528337	1529048	712	1	126520	ENST00000588292.1	15960	ENSG00000185988	PLK5	polo like kinase 5
chr16	67628510	67628977	468	*	Peak_34429	66	.	Promoter (2-3kb)	16	67626509	67639130	12622	1	10664	ENST00000642420.1	2001	ENSG00000102974	CTCF	CCCTC-binding factor
chr21	46227818	46228069	252	*	Peak_34434	66	.	Promoter (<=1kb)	21	46215685	46228762	13078	2	4047	ENST00000464357.1	693	ENSG00000160285	LSS	lanosterol synthase
chr19	5335330	5335770	441	*	Peak_34550	66	.	Intron (ENST00000588552.5/5802, intron 1 of 30)	19	5158495	5340803	182309	2	5802	ENST00000588552.5	5033	ENSG00000105426	PTPRS	protein tyrosine phosphatase receptor type S
chr9	15419347	15419990	644	*	Peak_34675	66	.	Promoter (2-3kb)	9	15422704	15464134	41431	1	6619	ENST00000380821.7	-2714	ENSG00000164975	SNAPC3	small nuclear RNA activating complex polypeptide 3
chr17	4158198	4158643	446	*	Peak_34519	66	.	Intron (ENST00000573984.1/124936, intron 3 of 3)	17	4149891	4157455	7565	1	124936	ENST00000575411.2	8307	ENSG00000167740	CYB5D2	cytochrome b5 domain containing 2
chr18	58560235	58560563	329	*	Peak_34537	66	.	Intron (ENST00000589794.1/ENST00000589794.1, intron 1 of 1)	18	58538140	58579024	40885	2	115701	ENST00000587842.1	18461	ENSG00000198796	ALPK2	alpha kinase 2
chr7	158672489	158672757	269	*	Peak_34649	66	.	Intron (ENST00000432615.5/54892, intron 13 of 29)	7	158662240	158668195	5956	2	54892	ENST00000472591.2	-4294	ENSG00000146918	NCAPG2	non-SMC condensin II complex subunit G2
chr13	29737632	29738168	537	*	Peak_34485	66	.	Distal Intergenic	13	29764371	29850684	86314	2	5412	ENST00000380680.4	112516	ENSG00000122042	UBL3	ubiquitin like 3
chr2	157827380	157827785	406	*	Peak_34750	65	.	Intron (ENST00000263640.7/90, intron 1 of 10)	2	157737316	157838278	100963	2	90	ENST00000410057.6	10493	ENSG00000115170	ACVR1	activin A receptor type 1
chr14	105657891	105658229	339	*	Peak_34737	65	.	Distal Intergenic	14	105640168	105640232	65	1	102466889	ENST00000616772.1	17723	ENSG00000277030	MIR8071-2	microRNA 8071-2
chr12	111765207	111765774	568	*	Peak_34933	65	.	Promoter (1-2kb)	12	111766887	111809638	42752	1	217	ENST00000416293.7	-1113	ENSG00000111275	ALDH2	aldehyde dehydrogenase 2 family member
chr9	33211947	33212302	356	*	Peak_35061	65	.	Distal Intergenic	9	33218365	33248552	30188	1	27290	ENST00000379725.5	-6063	ENSG00000122711	SPINK4	serine peptidase inhibitor, Kazal type 4
chr6	81442406	81442965	560	*	Peak_35030	65	.	Distal Intergenic	6	81749870	81751753	1884	2	55603	ENST00000423467.1	308788	ENSG00000112773	TENT5A	terminal nucleotidyltransferase 5A
chr19	42138433	42138801	369	*	Peak_34979	65	.	Intron (ENST00000524801.6/5452, intron 2 of 6)	19	42134504	42137087	2584	1	100505622	ENST00000531517.1	3929	ENSG00000254887	LOC100505622	uncharacterized LOC100505622
chr8	11039279	11039585	307	*	Peak_35094	65	.	Intron (ENST00000416569.2/286046, intron 1 of 2)	8	11035206	11035302	97	2	693183	ENST00000384868.3	-3977	ENSG00000207600	MIR598	microRNA 598
chr2	46517772	46518026	255	*	Peak_35087	65	.	Promoter (1-2kb)	2	46511847	46519957	8111	2	90423	ENST00000306448.4	1931	ENSG00000250565	ATP6V1E2	ATPase H+ transporting V1 subunit E2
chr16	85383253	85383758	506	*	Peak_35251	65	.	Intron (ENST00000637419.1/23199, intron 2 of 2)	16	85306226	85306325	100	2	100847022	ENST00000583199.1	-76928	ENSG00000266307	MIR5093	microRNA 5093
chr2	134083836	134084188	353	*	Peak_35267	65	.	Distal Intergenic	2	134120182	134454621	334440	1	4249	ENST00000409645.5	-35994	ENSG00000152127	MGAT5	alpha-1,6-mannosylglycoprotein 6-beta-N-acetylglucosaminyltransferase
chr2	44306729	44306980	252	*	Peak_35277	65	.	Promoter (2-3kb)	2	44303806	44320798	16993	1	6519	ENST00000409740.3	2923	ENSG00000138079	SLC3A1	solute carrier family 3 member 1
chr20	48556195	48556485	291	*	Peak_35408	64	.	Distal Intergenic	20	48642113	48642738	626	2	57580	ENST00000496915.1	86253	ENSG00000124126	PREX1	phosphatidylinositol-3,4,5-trisphosphate dependent Rac exchange factor 1
chr7	149752862	149753228	367	*	Peak_35449	64	.	Distal Intergenic	7	149764182	149773219	9038	2	168544	ENST00000484747.5	19991	ENSG00000181444	ZNF467	zinc finger protein 467
chr1	26715164	26715464	301	*	Peak_35473	64	.	Intron (ENST00000430799.7/8289, intron 1 of 19)	1	26727708	26731318	3611	1	8289	ENST00000524572.1	-12244	ENSG00000117713	ARID1A	AT-rich interaction domain 1A
chr5	113057089	113057676	588	*	Peak_35482	64	.	Intron (ENST00000302475.8/4163, intron 12 of 16)	5	113048563	113064040	15478	2	4163	ENST00000624689.3	6364	ENSG00000171444	MCC	MCC regulator of WNT signaling pathway
chr5	81188995	81189363	369	*	Peak_35563	64	.	Intron (ENST00000265080.8/5924, intron 18 of 26)	5	81233285	81266397	33113	1	1160	ENST00000254035.8	-43922	ENSG00000131730	CKMT2	creatine kinase, mitochondrial 2
chr5	14385437	14385754	318	*	Peak_35743	63	.	Promoter (1-2kb)	5	14387343	14387950	608	1	7204	ENST00000510757.1	-1589	ENSG00000038382	TRIO	trio Rho guanine nucleotide exchange factor
chr1	24058338	24058648	311	*	Peak_35768	63	.	Intron (ENST00000439239.2/ENST00000439239.2, intron 2 of 3)	1	24056035	24066579	10545	2	127294	ENST00000338909.9	7931	ENSG00000142661	MYOM3	myomesin 3
chr10	47264168	47264506	339	*	Peak_35750	63	.	Distal Intergenic	10	47300386	47313547	13162	1	2662	ENST00000580279.1	-35880	ENSG00000266524	GDF10	growth differentiation factor 10
chr13	33499284	33499595	312	*	Peak_35828	63	.	Intron (ENST00000454681.2/90627, intron 2 of 5)	13	33511330	33524322	12993	2	90627	ENST00000437698.1	24727	ENSG00000133121	STARD13	StAR related lipid transfer domain containing 13
chr12	132363825	132364199	375	*	Peak_35922	63	.	Distal Intergenic	12	132329850	132331575	1726	1	101928416	ENST00000537720.1	33975	ENSG00000255916	LOC101928416	uncharacterized LOC101928416
chr11	47242468	47243135	668	*	Peak_35990	63	.	Promoter (1-2kb)	11	47240086	47244960	4875	2	53	ENST00000525230.5	1825	ENSG00000134575	ACP2	acid phosphatase 2, lysosomal
chr12	47527936	47528330	395	*	Peak_36049	63	.	Distal Intergenic	12	47414651	47420179	5529	1	111082992	ENST00000552320.2	113285	NA	LINC02156	long intergenic non-protein coding RNA 2156
chr11	65995650	65995901	252	*	Peak_36076	63	.	Downstream (<1kb)	11	65998614	66000482	1869	2	84285	ENST00000529973.1	4581	ENSG00000175376	EIF1AD	eukaryotic translation initiation factor 1A domain containing
chr17	75075779	75076257	479	*	Peak_36079	63	.	Intron (ENST00000455685.1/ENST00000455685.1, intron 2 of 3)	17	75087727	75106162	18436	1	9121	ENST00000580123.5	-11470	ENSG00000170190	SLC16A5	solute carrier family 16 member 5
chr19	40496355	40496650	296	*	Peak_36093	63	.	Promoter (<=1kb)	19	40497429	40502492	5064	1	57731	ENST00000598775.1	-779	ENSG00000160460	SPTBN4	spectrin beta, non-erythrocytic 4
chr1	86415857	86416172	316	*	Peak_36147	63	.	Distal Intergenic	1	86424086	86456558	32473	1	9635	ENST00000370565.4	-7914	ENSG00000137975	CLCA2	chloride channel accessory 2
chr9	132575590	132576020	431	*	Peak_36197	62	.	Distal Intergenic	9	132582185	132590266	8082	1	56751	ENST00000263610.6	-6165	ENSG00000125492	BARHL1	BarH like homeobox 1
chr2	96888195	96888764	570	*	Peak_36242	62	.	Intron (ENST00000393526.6/51252, intron 2 of 4)	2	96876026	96895142	19117	2	51252	ENST00000470789.5	6378	ENSG00000168754	FAM178B	family with sequence similarity 178 member B
chr2	3834998	3835274	277	*	Peak_36330	62	.	Intron (ENST00000399143.8/728597, intron 10 of 10)	2	3844184	3847411	3228	1	728597	ENST00000451101.1	-8910	ENSG00000214866	DCDC2C	doublecortin domain containing 2C
chr17	80373136	80373752	617	*	Peak_36343	62	.	Promoter (<=1kb)	17	80373069	80375059	1991	1	57674	ENST00000573038.1	67	ENSG00000173821	RNF213	ring finger protein 213
chr3	194449370	194449791	422	*	Peak_36453	62	.	Promoter (2-3kb)	3	194402674	194452041	49368	2	79572	ENST00000619199.4	2250	ENSG00000133657	ATP13A3	ATPase 13A3
chr8	97243462	97243757	296	*	Peak_36504	61	.	Distal Intergenic	8	97273474	97277964	4491	2	85453	ENST00000322128.4	34207	ENSG00000180543	TSPYL5	TSPY like 5
chr1	99027737	99028157	421	*	Peak_37623	61	.	Intron (ENST00000425113.1/100129620, intron 1 of 2)	1	98890245	99005032	114788	2	163404	ENST00000370188.7	-22705	ENSG00000117598	PLPPR5	phospholipid phosphatase related 5
chr1	90532940	90533230	291	*	Peak_37569	61	.	Intron (ENST00000435832.1/ENST00000435832.1, intron 1 of 3)	1	90657750	90657964	215	1	109616984	ENST00000362796.2	-124520	ENSG00000199666	SNORD3G	small nucleolar RNA, C/D box 3G
chr19	34568362	34568738	377	*	Peak_37597	61	.	Distal Intergenic	19	34576733	34577460	728	2	643719	ENST00000597830.1	8722	NA	SCGB1B2P	secretoglobin family 1B member 2, pseudogene
chr7	143247825	143248171	347	*	Peak_38563	61	.	Intron (ENST00000436038.5/373156, intron 1 of 4)	7	143244093	143265092	21000	1	373156	ENST00000436038.5	3732	ENSG00000197448	GSTK1	glutathione S-transferase kappa 1
chr9	124004188	124004490	303	*	Peak_38813	61	.	Promoter (2-3kb)	9	124001670	124015361	13692	1	9355	ENST00000560961.2	2518	ENSG00000106689	LHX2	LIM homeobox 2
chr12	39607632	39608110	479	*	Peak_37008	61	.	Exon (ENST00000308666.3/225, exon 3 of 10)	12	39550033	39619751	69719	2	225	ENST00000308666.3	11641	ENSG00000173208	ABCD2	ATP binding cassette subfamily D member 2
chr2	174915112	174915375	264	*	Peak_37778	61	.	Promoter (<=1kb)	2	174846914	174915292	68379	2	1123	ENST00000490654.1	0	ENSG00000128656	CHN1	chimerin 1
chr8	94524232	94524587	356	*	Peak_38786	61	.	Promoter (1-2kb)	8	94488520	94526302	37783	2	25962	ENST00000522263.5	1715	ENSG00000164944	VIRMA	vir like m6A methyltransferase associated
chr6	34017814	34018080	267	*	Peak_38465	61	.	Downstream (<1kb)	6	33999972	34000051	80	2	100302123	ENST00000408770.1	-17763	ENSG00000221697	MIR1275	microRNA 1275
chr11	111761827	111762083	257	*	Peak_36727	61	.	Intron (ENST00000311129.9/5519, intron 3 of 15)	11	111760956	111766062	5107	2	5519	ENST00000531373.1	3979	ENSG00000137713	PPP2R1B	protein phosphatase 2 scaffold subunit Abeta
chr13	47286003	47286454	452	*	Peak_37132	61	.	Distal Intergenic	13	46831555	46897076	65522	2	3356	ENST00000543956.4	-388927	ENSG00000102468	HTR2A	5-hydroxytryptamine receptor 2A
chr15	20361300	20361565	266	*	Peak_37265	61	.	Distal Intergenic	15	20283496	20291558	8063	1	646096	ENST00000554701.2	77804	ENSG00000259156	CHEK2P2	checkpoint kinase 2 pseudogene 2
chr1	191701158	191701424	267	*	Peak_36870	61	.	Distal Intergenic	1	192158457	192185815	27359	1	64407	ENST00000367460.3	-457033	ENSG00000150681	RGS18	regulator of G protein signaling 18
chr5	99388643	99388895	253	*	Peak_38390	61	.	Distal Intergenic	5	99549432	99577957	28526	1	102724855	ENST00000510302.1	-160537	NA	LINC02113	long intergenic non-protein coding RNA 2113
chr5	58809654	58809921	268	*	Peak_38365	61	.	Intron (ENST00000282878.5/115827, intron 3 of 4)	5	58788279	58851527	63249	1	115827	ENST00000381158.3	21375	ENSG00000152932	RAB3C	RAB3C, member RAS oncogene family
chr11	47636324	47636604	281	*	Peak_36808	61	.	Promoter (2-3kb)	11	47618839	47638791	19953	2	23788	ENST00000525649.5	2187	ENSG00000109919	MTCH2	mitochondrial carrier 2
chr10	121820495	121820757	263	*	Peak_36601	61	.	Intron (ENST00000224652.10/11101, intron 10 of 11)	10	121782494	121790226	7733	2	11101	ENST00000485281.1	-30269	ENSG00000107669	ATE1	arginyltransferase 1
chr10	77866044	77866463	420	*	Peak_36686	61	.	Promoter (2-3kb)	10	77790791	77869191	78401	2	9231	ENST00000475613.6	2728	ENSG00000151208	DLG5	discs large MAGUK scaffold protein 5
chr11	72048515	72048911	397	*	Peak_39036	61	.	Intron (ENST00000351960.10/4926, intron 2 of 24)	11	72019556	72042142	22587	2	4926	ENST00000543009.5	-6373	ENSG00000137497	NUMA1	nuclear mitotic apparatus protein 1
chr8	89828927	89829187	261	*	Peak_39238	61	.	Intron (ENST00000619538.1/ENST00000619538.1, intron 1 of 2)	8	89780088	89780778	691	1	8767	ENST00000518673.1	48839	ENSG00000104312	RIPK2	receptor interacting serine/threonine kinase 2
chr6	21314485	21314876	392	*	Peak_39425	61	.	Distal Intergenic	6	21200812	21231441	30630	1	54901	ENST00000476517.1	113673	ENSG00000145996	CDKAL1	CDK5 regulatory subunit associated protein 1 like 1
chr8	122628798	122629088	291	*	Peak_39532	60	.	Distal Intergenic	8	122670385	122694106	23722	2	104266958	ENST00000521608.1	65018	ENSG00000253819	LINC01151	long intergenic non-protein coding RNA 1151
chr8	143760695	143761019	325	*	Peak_39750	60	.	Intron (ENST00000527139.6/100128338, intron 3 of 13)	8	143758153	143771822	13670	2	105375800	ENST00000529743.1	10803	ENSG00000254973	LOC105375800	chromosome 12 open reading frame 49 pseudogene
chr5	82425767	82426166	400	*	Peak_39735	60	.	Distal Intergenic	5	82310036	82318380	8345	1	92270	ENST00000514672.1	115731	ENSG00000205464	ATP6AP1L	ATPase H+ transporting accessory protein 1 like
chr5	61743686	61744091	406	*	Peak_40117	60	.	Intron (ENST00000507461.1/285668, intron 1 of 3)	5	61735138	61735669	532	2	100506526	ENST00000512882.2	-8017	NA	C5orf64-AS1	C5orf64 antisense RNA 1
chr1	151376202	151376536	335	*	Peak_39831	60	.	Distal Intergenic	1	151364302	151372733	8432	2	8991	ENST00000368868.9	-3469	ENSG00000143416	SELENBP1	selenium binding protein 1
chr19	48229148	48229580	433	*	Peak_39988	60	.	Promoter (<=1kb)	19	48211827	48230498	18672	2	22900	ENST00000523579.5	918	ENSG00000105483	CARD8	caspase recruitment domain family member 8
chr7	130526975	130527280	306	*	Peak_40163	60	.	Intron (ENST00000425248.5/26958, intron 20 of 23)	7	130498380	130501069	2690	1	4232	ENST00000488093.1	28595	ENSG00000106484	MEST	mesoderm specific transcript
chr8	69687105	69687356	252	*	Peak_40201	60	.	Intron (ENST00000260126.8/81796, intron 6 of 9)	8	69638811	69641147	2337	1	23213	ENST00000526654.1	48294	ENSG00000137573	SULF1	sulfatase 1
chr1	218204057	218204332	276	*	Peak_40233	60	.	Distal Intergenic	1	218285287	218337983	52697	1	51018	ENST00000366932.3	-80955	ENSG00000067533	RRP15	ribosomal RNA processing 15 homolog
chr1	34680884	34681292	409	*	Peak_40408	60	.	Distal Intergenic	1	34669599	34669694	96	2	693137	ENST00000385206.1	-11190	ENSG00000207941	MIR552	microRNA 552
chr1	23267950	23268485	536	*	Peak_40467	60	.	Distal Intergenic	1	23284356	23285454	1099	2	100996511	ENST00000604481.1	16969	NA	LINC01355	long intergenic non-protein coding RNA 1355
chr19	50546919	50547413	495	*	Peak_40499	60	.	Intron (ENST00000599957.5/94030, intron 2 of 2)	19	50516892	50551042	34151	2	94030	ENST00000599957.5	3629	ENSG00000131409	LRRC4B	leucine rich repeat containing 4B
chr9	33407456	33407776	321	*	Peak_40619	60	.	Intron (ENST00000450864.1/ENST00000450864.1, intron 2 of 2)	9	33385458	33402682	17225	2	364	ENST00000624005.3	-4774	ENSG00000165269	AQP7	aquaporin 7
chr17	44987784	44988329	546	*	Peak_40557	60	.	Distal Intergenic	17	44959693	44968071	8379	2	10882	ENST00000253407.3	-19713	ENSG00000131094	C1QL1	complement C1q like 1
chr11	10319145	10319779	635	*	Peak_40719	59	.	Promoter (1-2kb)	11	10317671	10478637	160967	1	272	ENST00000532250.5	1474	ENSG00000133805	AMPD3	adenosine monophosphate deaminase 3
chr20	40940062	40940400	339	*	Peak_40734	59	.	Distal Intergenic	20	41028818	41124487	95670	1	7150	ENST00000361337.2	-88418	ENSG00000198900	TOP1	DNA topoisomerase I
chr3	123310507	123310808	302	*	Peak_40950	59	.	Intron (ENST00000462833.5/111, intron 12 of 20)	3	123297257	123304079	6823	2	111	ENST00000474577.5	-6428	ENSG00000173175	ADCY5	adenylate cyclase 5
chr11	1850775	1851099	325	*	Peak_41070	59	.	Promoter (1-2kb)	11	1852970	1892263	39294	1	4046	ENST00000311604.7	-1871	ENSG00000130592	LSP1	lymphocyte specific protein 1
chr6	12365330	12365618	289	*	Peak_41204	59	.	Distal Intergenic	6	12290363	12297194	6832	1	1906	ENST00000379375.5	74967	ENSG00000078401	EDN1	endothelin 1
chr11	92797369	92797676	308	*	Peak_41437	59	.	Intron (ENST00000409404.6/120114, intron 8 of 24)	11	92844340	92896305	51966	1	120114	ENST00000533797.1	-46664	ENSG00000165323	FAT3	FAT atypical cadherin 3
chr5	172224437	172224767	331	*	Peak_41482	59	.	Intron (ENST00000393792.2/92181, intron 2 of 2)	5	172194172	172203452	9281	1	285588	ENST00000398186.4	30265	ENSG00000214360	EFCAB9	EF-hand calcium binding domain 9
chr1	229777898	229778260	363	*	Peak_41562	59	.	Distal Intergenic	1	229875550	229885752	10203	2	101927504	ENST00000435973.1	107492	ENSG00000227043	LINC01682	long intergenic non-protein coding RNA 1682
chr11	15770392	15770695	304	*	Peak_41670	58	.	Distal Intergenic	11	15643885	15705368	61484	1	102724957	ENST00000532242.1	126507	ENSG00000254695	LOC102724957	uncharacterized LOC102724957
chr22	17880328	17880629	302	*	Peak_41763	58	.	Intron (ENST00000441493.6/57553, intron 16 of 31)	22	17871930	17876872	4943	2	57553	ENST00000465886.1	-3456	ENSG00000243156	MICAL3	microtubule associated monooxygenase, calponin and LIM domain containing 3
chr22	19619286	19619736	451	*	Peak_41857	58	.	Distal Intergenic	22	19565203	19566839	1637	2	150185	ENST00000629028.1	-52447	NA	LINC00895	long intergenic non-protein coding RNA 895
chr17	45337999	45338423	425	*	Peak_41910	58	.	Distal Intergenic	17	45263119	45317145	54027	2	9020	ENST00000648527.1	-20854	ENSG00000006062	MAP3K14	mitogen-activated protein kinase kinase kinase 14
chr4	4294296	4294655	360	*	Peak_42436	57	.	Intron (ENST00000515012.5/166793, intron 1 of 5)	4	4290269	4302274	12006	1	166793	ENST00000502918.1	4027	ENSG00000168826	ZBTB49	zinc finger and BTB domain containing 49
chr7	159063914	159064264	351	*	Peak_42560	57	.	Intron (ENST00000262178.6/7434, intron 4 of 12)	7	159030455	159097204	66750	2	7434	ENST00000377633.7	32940	ENSG00000106018	VIPR2	vasoactive intestinal peptide receptor 2
chr13	27484019	27484365	347	*	Peak_42600	57	.	Distal Intergenic	13	27437150	27450591	13442	2	219402	ENST00000485650.5	-33428	ENSG00000122033	MTIF3	mitochondrial translational initiation factor 3
chr8	22641088	22641504	417	*	Peak_42698	57	.	Intron (ENST00000276416.10/55909, intron 2 of 8)	8	22620775	22644804	24030	2	55909	ENST00000399977.8	3300	ENSG00000147439	BIN3	bridging integrator 3
chr2	201475866	201476195	330	*	Peak_42651	57	.	Promoter (<=1kb)	2	201475671	201478567	2897	1	55437	ENST00000468123.1	195	ENSG00000082146	STRADB	STE20 related adaptor beta
chr3	37268567	37269130	564	*	Peak_42768	57	.	Intron (ENST00000361924.6/2803, intron 2 of 23)	3	37282183	37366750	84568	1	2803	ENST00000437131.1	-13053	ENSG00000144674	GOLGA4	golgin A4
chr1	36106845	36107122	278	*	Peak_42737	57	.	Intron (ENST00000397799.1/1296, intron 2 of 3)	1	36097507	36100249	2743	2	1296	ENST00000481785.1	-6596	ENSG00000171812	COL8A2	collagen type VIII alpha 2 chain
chr2	120067945	120068322	378	*	Peak_42896	57	.	Intron (ENST00000263713.9/57669, intron 3 of 24)	2	120090483	120101627	11145	1	57669	ENST00000489017.5	-22161	ENSG00000115109	EPB41L5	erythrocyte membrane protein band 4.1 like 5
chr3	15654950	15655485	536	*	Peak_42950	57	.	Distal Intergenic	3	15669792	15676223	6432	2	23243	ENST00000498713.1	20738	ENSG00000206560	ANKRD28	ankyrin repeat domain 28
chr1	2386933	2387313	381	*	Peak_43157	56	.	Promoter (<=1kb)	1	2371165	2387529	16365	2	79906	ENST00000469374.5	216	ENSG00000116151	MORN1	MORN repeat containing 1
chr13	36266288	36266580	293	*	Peak_43178	56	.	Intron (ENST00000511166.1/100526761, intron 2 of 15)	13	36227120	36297749	70630	2	728591	ENST00000239860.10	31169	ENSG00000242715	CCDC169	coiled-coil domain containing 169
chr5	158149879	158150444	566	*	Peak_43402	56	.	Distal Intergenic	5	158320683	158409773	89091	2	101927697	ENST00000619068.1	259329	ENSG00000276778	LINC02227	long intergenic non-protein coding RNA 2227
chr2	4972496	4973048	553	*	Peak_43484	56	.	Distal Intergenic	2	4628222	4656215	27994	2	727982	ENST00000412134.5	-316281	ENSG00000231532	LINC01249	long intergenic non-protein coding RNA 1249
chr1	16999861	17000219	359	*	Peak_43629	56	.	Promoter (<=1kb)	1	16995859	17000291	4433	2	23400	ENST00000502860.1	72	ENSG00000159363	ATP13A2	ATPase cation transporting 13A2
chr18	49650475	49651148	674	*	Peak_43649	56	.	Exon (ENST00000590640.1/ENST00000590640.1, exon 1 of 1)	18	49562345	49567763	5419	1	9388	ENST00000579750.1	88130	ENSG00000101670	LIPG	lipase G, endothelial type
chr3	62275410	62275867	458	*	Peak_43764	55	.	Intron (ENST00000295874.14/5793, intron 22 of 28)	3	62243805	62263465	19661	1	5793	ENST00000468576.1	31605	ENSG00000144724	PTPRG	protein tyrosine phosphatase receptor type G
chr8	142749869	142750833	965	*	Peak_43839	55	.	Promoter (1-2kb)	8	142750150	142752534	2385	2	137797	ENST00000359228.3	1701	ENSG00000197353	LYPD2	LY6/PLAUR domain containing 2
chr3	13780827	13781156	330	*	Peak_44177	55	.	Distal Intergenic	3	13863668	13875113	11446	2	7476	ENST00000489346.1	93957	ENSG00000154764	WNT7A	Wnt family member 7A
chr22	20748648	20749143	496	*	Peak_44175	55	.	Promoter (2-3kb)	22	20747484	20751680	4197	2	5297	ENST00000475414.1	2537	ENSG00000241973	PI4KA	phosphatidylinositol 4-kinase alpha
chr12	52549275	52549709	435	*	Peak_44211	54	.	Exon (ENST00000267119.5/112802, exon 3 of 9)	12	52543909	52553147	9239	2	112802	ENST00000267119.5	3438	ENSG00000139648	KRT71	keratin 71
chr3	136727210	136727667	458	*	Peak_44243	54	.	Intron (ENST00000383202.6/10274, intron 1 of 33)	3	136518043	136752366	234324	2	10274	ENST00000480733.1	24699	ENSG00000118007	STAG1	stromal antigen 1
chr18	10757818	10758346	529	*	Peak_44310	54	.	Promoter (1-2kb)	18	10759584	10759649	66	2	102466735	ENST00000618842.1	1303	ENSG00000274838	MIR6788	microRNA 6788
chr9	129254179	129254630	452	*	Peak_44372	54	.	Distal Intergenic	9	129282458	129285728	3271	1	101929331	ENST00000455981.1	-27828	ENSG00000224307	LOC101929331	uncharacterized LOC101929331
chr17	58803923	58804338	416	*	Peak_45648	54	.	Intron (ENST00000308249.3/22843, intron 1 of 6)	17	58755869	58985176	229308	1	22843	ENST00000308249.3	48054	ENSG00000175175	PPM1E	protein phosphatase, Mg2+/Mn2+ dependent 1E
chr5	5868526	5868919	394	*	Peak_46897	54	.	Distal Intergenic	5	5422742	5437836	15095	1	23379	ENST00000505464.1	445784	ENSG00000164151	ICE1	interactor of little elongation complex ELL subunit 1
chr16	87217171	87217456	286	*	Peak_45581	54	.	Intron (ENST00000566092.1/101928708, intron 2 of 2)	16	87212122	87226430	14309	1	101928708	ENST00000566092.1	5049	ENSG00000261095	LOC101928708	uncharacterized LOC101928708
chr14	106060214	106060448	235	*	Peak_45210	54	.	Distal Intergenic	14	105969729	105972269	2541	2	8755	ENST00000606026.2	-87945	ENSG00000271968	ADAM6	ADAM metallopeptidase domain 6 (pseudogene)
chr14	49025912	49026203	292	*	Peak_45244	54	.	Distal Intergenic	14	49585390	49586325	936	2	6235	ENST00000557519.1	560122	ENSG00000213741	RPS29	ribosomal protein S29
chr16	84917094	84917370	277	*	Peak_45569	54	.	Intron (ENST00000566165.1/83716, intron 1 of 2)	16	84889244	84920768	31525	1	83716	ENST00000566165.1	27850	ENSG00000103196	CRISPLD2	cysteine rich secretory protein LCCL domain containing 2
chr5	77639307	77639610	304	*	Peak_46922	54	.	Promoter (<=1kb)	5	77628712	77639688	10977	2	23440	ENST00000306422.4	78	ENSG00000171540	OTP	orthopedia homeobox
chr3	7072204	7072447	244	*	Peak_46549	54	.	Intron (ENST00000443259.1/2917, intron 4 of 4)	3	6892632	6894022	1391	2	105376946	ENST00000427748.1	-178182	ENSG00000237665	GRM7-AS2	GRM7 antisense RNA 2
chrX	24176618	24177025	408	*	Peak_47725	54	.	Intron (ENST00000428571.5/7543, intron 2 of 2)	23	24172756	24179550	6795	1	7543	ENST00000474385.1	3862	ENSG00000005889	ZFX	zinc finger protein X-linked
chr1	163654824	163655145	322	*	Peak_44768	54	.	Distal Intergenic	1	163340255	163343815	3561	1	83540	ENST00000531529.1	314569	ENSG00000143228	NUF2	NUF2 component of NDC80 kinetochore complex
chr7	20546965	20547248	284	*	Peak_47255	54	.	Distal Intergenic	7	20615207	20757009	141803	1	340273	ENST00000404938.6	-67959	ENSG00000004846	ABCB5	ATP binding cassette subfamily B member 5
chr6	9306993	9307270	278	*	Peak_47155	54	.	Distal Intergenic	6	8783275	8786889	3615	1	100506207	ENST00000645808.1	523718	ENSG00000285219	LOC100506207	uncharacterized LOC100506207
chr20	62637030	62637502	473	*	Peak_47803	54	.	Distal Intergenic	20	62642445	62672295	29851	1	28231	ENST00000217159.5	-4943	ENSG00000101187	SLCO4A1	solute carrier organic anion transporter family member 4A1
chr11	88100631	88100933	303	*	Peak_47828	54	.	Intron (ENST00000528458.1/ENST00000528458.1, intron 1 of 2)	11	88113464	88175433	61970	2	23682	ENST00000531138.1	74500	ENSG00000123892	RAB38	RAB38, member RAS oncogene family
chr11	83567957	83568793	837	*	Peak_47827	54	.	Intron (ENST00000280241.12/1740, intron 13 of 21)	11	83462068	83484213	22146	2	1740	ENST00000457267.5	-83744	ENSG00000150672	DLG2	discs large MAGUK scaffold protein 2
chr1	36659896	36660225	330	*	Peak_48033	54	.	Distal Intergenic	1	36466043	36483278	17236	2	1441	ENST00000373106.5	-176618	ENSG00000119535	CSF3R	colony stimulating factor 3 receptor
chr1	10920160	10920686	527	*	Peak_49066	54	.	Distal Intergenic	1	10946475	10947870	1396	2	148345	ENST00000468348.1	27184	ENSG00000175262	C1orf127	chromosome 1 open reading frame 127
chr3	16172319	16172583	265	*	Peak_49219	54	.	Promoter (2-3kb)	3	16174649	16229746	55098	1	117248	ENST00000339732.9	-2066	ENSG00000131386	GALNT15	polypeptide N-acetylgalactosaminyltransferase 15
chr13	28762955	28763223	269	*	Peak_49122	54	.	Distal Intergenic	13	28700717	28718970	18254	2	283537	ENST00000380814.4	-43985	ENSG00000139508	SLC46A3	solute carrier family 46 member 3
chr17	49108037	49108576	540	*	Peak_49153	54	.	Distal Intergenic	17	49132460	49169989	37530	1	124872	ENST00000504681.5	-23884	ENSG00000167080	B4GALNT2	beta-1,4-N-acetyl-galactosaminyltransferase 2
chr7	22840834	22841104	271	*	Peak_49410	54	.	Distal Intergenic	7	22854178	22859487	5310	1	109729180	ENST00000415611.7	-13074	NA	SNHG26	small nucleolar RNA host gene 26
chr8	29187142	29187397	256	*	Peak_49480	54	.	Intron (ENST00000524189.5/23303, intron 5 of 39)	8	29150297	29263062	112766	2	23303	ENST00000523968.1	75665	ENSG00000197892	KIF13B	kinesin family member 13B
chr2	143936919	143937487	569	*	Peak_49793	53	.	Promoter (<=1kb)	2	143937073	143964156	27084	1	101928386	ENST00000422799.1	0	ENSG00000232377	LOC101928386	uncharacterized LOC101928386
chr19	4490185	4490926	742	*	Peak_49749	53	.	Intron (ENST00000616600.4/84717, intron 4 of 15)	19	4496333	4502104	5772	1	84717	ENST00000587016.5	-5407	ENSG00000167674	HDGFL2	HDGF like 2
chr1	35164153	35164558	406	*	Peak_49652	53	.	Distal Intergenic	1	35176378	35177661	1284	2	6421	ENST00000471991.5	13103	ENSG00000116560	SFPQ	splicing factor proline and glutamine rich
chr12	3186667	3187113	447	*	Peak_50008	53	.	Intron (ENST00000537971.5/10867, intron 1 of 7)	12	3199984	3278612	78629	1	10867	ENST00000640568.1	-12871	ENSG00000011105	TSPAN9	tetraspanin 9
chr3	32451180	32451517	338	*	Peak_50282	53	.	Promoter (<=1kb)	3	32451003	32454835	3833	1	112616	ENST00000464689.1	177	ENSG00000153551	CMTM7	CKLF like MARVEL transmembrane domain containing 7
chr10	116846806	116847132	327	*	Peak_50298	53	.	Promoter (2-3kb)	10	116849512	116882527	33016	1	387712	ENST00000409522.5	-2380	ENSG00000188316	ENO4	enolase 4
chr17	41943962	41944235	274	*	Peak_50453	53	.	Intron (ENST00000591658.5/83538, intron 7 of 9)	17	41935298	41937041	1744	1	83538	ENST00000585530.1	8664	ENSG00000204815	TTC25	tetratricopeptide repeat domain 25
chr1	85581569	85581876	308	*	Peak_50537	53	.	Promoter (<=1kb)	1	85581200	85582099	900	1	3491	ENST00000480413.1	369	ENSG00000142871	CCN1	cellular communication network factor 1
chr13	30858328	30858633	306	*	Peak_50665	52	.	Distal Intergenic	13	30882551	30883395	845	1	440132	ENST00000440633.1	-23918	ENSG00000236094	LINC00545	long intergenic non-protein coding RNA 545
chr2	47181190	47181583	394	*	Peak_50671	52	.	Distal Intergenic	2	47160083	47176601	16519	2	805	ENST00000628793.2	-4589	ENSG00000143933	CALM2	calmodulin 2
chr20	33019875	33020421	547	*	Peak_50733	52	.	Exon (ENST00000170150.3/80341, exon 12 of 16)	20	33031648	33044041	12394	1	128859	ENST00000542375.5	-11227	ENSG00000167104	BPIFB6	BPI fold containing family B member 6
chr1	58837306	58838038	733	*	Peak_50727	52	.	Intron (ENST00000649834.1/100131060, intron 1 of 2)	1	58785160	58899594	114435	1	100131060	ENST00000419531.2	52146	ENSG00000234807	LINC01135	long intergenic non-protein coding RNA 1135
chr16	19506713	19507084	372	*	Peak_50756	52	.	Promoter (1-2kb)	16	19503101	19505132	2032	2	51573	ENST00000563645.1	-1581	ENSG00000006007	GDE1	glycerophosphodiester phosphodiesterase 1
chr21	41669332	41669841	510	*	Peak_50813	52	.	Distal Intergenic	21	41679181	41697336	18156	1	54090	ENST00000413718.1	-9340	NA	LINC00111	long intergenic non-protein coding RNA 111
chr13	45065346	45065902	557	*	Peak_51524	51	.	Intron (ENST00000437748.2/26747, intron 1 of 2)	13	44982077	45083125	101049	2	26747	ENST00000437748.2	17223	ENSG00000083635	NUFIP1	nuclear FMR1 interacting protein 1
chr6	12128961	12129299	339	*	Peak_51792	51	.	Intron (ENST00000541134.5/3096, intron 4 of 8)	6	12125746	12164575	38830	1	3096	ENST00000399469.2	3215	ENSG00000095951	HIVEP1	human immunodeficiency virus type I enhancer binding protein 1
chr15	69327236	69327555	320	*	Peak_51743	51	.	Intron (ENST00000395407.6/54852, intron 1 of 8)	15	69314403	69404504	90102	1	54852	ENST00000561153.5	12833	ENSG00000137819	PAQR5	progestin and adipoQ receptor family member 5
chr8	33478343	33478684	342	*	Peak_52540	51	.	Intron (ENST00000519356.1/80185, intron 5 of 5)	8	33370824	33473422	102599	2	84750	ENST00000327671.9	-4921	ENSG00000172728	FUT10	fucosyltransferase 10
chr1	98940813	98941265	453	*	Peak_52903	50	.	Intron (ENST00000370188.7/163404, intron 3 of 5)	1	99004276	99148852	144577	1	100129620	ENST00000425113.1	-63011	ENSG00000232825	LOC100129620	uncharacterized LOC100129620
chr12	29769232	29769497	266	*	Peak_52995	50	.	Intron (ENST00000256062.9/83857, intron 1 of 17)	12	29532568	29783046	250479	2	83857	ENST00000553189.5	13549	ENSG00000133687	TMTC1	transmembrane and tetratricopeptide repeat containing 1
chr12	122847991	122848458	468	*	Peak_53154	50	.	Promoter (2-3kb)	12	122850806	122855359	4554	1	9026	ENST00000536772.5	-2348	ENSG00000130787	HIP1R	huntingtin interacting protein 1 related
chr11	75713390	75713705	316	*	Peak_53307	50	.	Distal Intergenic	11	75717819	75731615	13797	1	80168	ENST00000198801.9	-4114	ENSG00000166391	MOGAT2	monoacylglycerol O-acyltransferase 2
chr3	15056214	15056707	494	*	Peak_53750	49	.	Intron (ENST00000253686.6/64432, intron 2 of 3)	3	15045099	15050102	5004	2	64432	ENST00000474866.1	-6112	ENSG00000131368	MRPS25	mitochondrial ribosomal protein S25
chr22	20242163	20242837	675	*	Peak_53751	49	.	Promoter (<=1kb)	22	20241417	20243684	2268	2	65078	ENST00000425986.1	847	ENSG00000040608	RTN4R	reticulon 4 receptor
chr11	67497833	67498180	348	*	Peak_54073	49	.	Promoter (<=1kb)	11	67491769	67498637	6869	2	9600	ENST00000527370.5	457	ENSG00000110697	PITPNM1	phosphatidylinositol transfer protein membrane associated 1
chr12	42246613	42246913	301	*	Peak_54273	48	.	Intron (ENST00000549190.5/51535, intron 1 of 9)	12	42238447	42441947	203501	1	51535	ENST00000549190.5	8166	ENSG00000134283	PPHLN1	periphilin 1
chr6	112048958	112049262	305	*	Peak_54500	48	.	Distal Intergenic	6	112054072	112070969	16898	1	8838	ENST00000368666.6	-4810	ENSG00000112761	CCN6	cellular communication network factor 6
chr1	62336933	62337377	445	*	Peak_54624	48	.	Distal Intergenic	1	62236979	62319414	82436	2	163782	ENST00000371153.8	-17519	ENSG00000132854	KANK4	KN motif and ankyrin repeat domains 4
chr1	6955331	6955880	550	*	Peak_54640	48	.	Intron (ENST00000303635.11/23261, intron 3 of 22)	1	6874056	6887842	13787	1	23261	ENST00000467267.1	81275	ENSG00000171735	CAMTA1	calmodulin binding transcription activator 1
chr6	3405859	3406258	400	*	Peak_54787	48	.	Intron (ENST00000436008.6/63027, intron 3 of 10)	6	3289766	3377986	88221	2	63027	ENST00000496753.1	-27873	ENSG00000137266	SLC22A23	solute carrier family 22 member 23
chr1	112815630	112816022	393	*	Peak_54530	48	.	Distal Intergenic	1	112820290	112849777	29488	2	100996702	ENST00000449572.2	33755	ENSG00000215866	LINC01356	long intergenic non-protein coding RNA 1356
chr2	1461495	1461950	456	*	Peak_54710	48	.	Intron (ENST00000497517.6/7173, intron 1 of 5)	2	1484663	1542660	57998	1	7173	ENST00000446278.5	-22713	ENSG00000115705	TPO	thyroid peroxidase
chr16	55954016	55954475	460	*	Peak_54997	48	.	Promoter (1-2kb)	16	55846154	55956031	109878	2	221223	ENST00000521992.5	1556	ENSG00000159398	CES5A	carboxylesterase 5A
chr16	75239289	75239683	395	*	Peak_55355	48	.	Promoter (<=1kb)	16	75229037	75238660	9624	2	9564	ENST00000566982.1	-629	ENSG00000050820	BCAR1	BCAR1 scaffold protein, Cas family member
chr16	57343563	57344099	537	*	Peak_55529	48	.	Distal Intergenic	16	57358772	57366190	7419	1	6367	ENST00000219235.4	-14673	ENSG00000102962	CCL22	C-C motif chemokine ligand 22
chr14	104516179	104516732	554	*	Peak_55490	48	.	Intron (ENST00000415614.6/388021, intron 3 of 3)	14	104579684	104590515	10832	1	400258	ENST00000557649.5	-62952	ENSG00000184601	C14orf180	chromosome 14 open reading frame 180
chr2	88680850	88681420	571	*	Peak_55679	48	.	Distal Intergenic	2	88691644	88750935	59292	1	22934	ENST00000283646.4	-10224	ENSG00000153574	RPIA	ribose 5-phosphate isomerase A
chr16	22212848	22213216	369	*	Peak_55946	48	.	Intron (ENST00000263026.9/29904, intron 1 of 17)	16	22206326	22265245	58920	1	29904	ENST00000568269.5	6522	ENSG00000103319	EEF2K	eukaryotic elongation factor 2 kinase
chr10	128044728	128045034	307	*	Peak_56088	48	.	Promoter (2-3kb)	10	128047406	128056171	8766	1	5791	ENST00000467366.1	-2372	ENSG00000132334	PTPRE	protein tyrosine phosphatase receptor type E
chr4	7491721	7492150	430	*	Peak_56698	48	.	Intron (ENST00000507866.6/57537, intron 2 of 26)	4	7460028	7460118	91	1	100422826	ENST00000579577.1	31693	ENSG00000266690	MIR4274	microRNA 4274
chr2	108024694	108024938	245	*	Peak_56513	48	.	Distal Intergenic	2	108049200	108052755	3556	2	107178918	ENST00000424355.1	27817	ENSG00000231221	LINC01593	long intergenic non-protein coding RNA 1593
chr11	45550771	45551197	427	*	Peak_56132	48	.	Distal Intergenic	11	45651233	45665594	14362	2	8534	ENST00000531322.1	114397	ENSG00000175264	CHST1	carbohydrate sulfotransferase 1
chr6	46777784	46778197	414	*	Peak_56808	48	.	Distal Intergenic	6	46793390	46839778	46389	1	4224	ENST00000230588.8	-15193	ENSG00000112818	MEP1A	meprin A subunit alpha
chr8	143664794	143665251	458	*	Peak_56888	48	.	Distal Intergenic	8	143649660	143656418	6759	1	9831	ENST00000501748.3	15134	ENSG00000183309	ZNF623	zinc finger protein 623
chr7	47167050	47167284	235	*	Peak_60502	47	.	Distal Intergenic	7	47275154	47280318	5165	2	64759	ENST00000428457.1	113034	ENSG00000136205	TNS3	tensin 3
chr19	44877317	44877713	397	*	Peak_61423	47	.	Intron (ENST00000252485.8/5819, intron 5 of 5)	19	44873942	44874689	748	1	5819	ENST00000587386.1	3375	ENSG00000130202	NECTIN2	nectin cell adhesion molecule 2
chr8	23028828	23029214	387	*	Peak_62032	47	.	Promoter (<=1kb)	8	23020133	23027968	7836	2	8795	ENST00000523752.5	-860	ENSG00000120889	TNFRSF10B	TNF receptor superfamily member 10b
chr5	113240911	113241350	440	*	Peak_62654	46	.	Intron (ENST00000302475.8/4163, intron 1 of 16)	5	113026132	113234677	208546	2	4163	ENST00000515367.6	-6234	ENSG00000171444	MCC	MCC regulator of WNT signaling pathway
chr17	52750777	52751228	452	*	Peak_62730	46	.	Distal Intergenic	17	52862121	52899588	37468	1	105371831	ENST00000412360.1	-110893	ENSG00000226364	LINC02089	long intergenic non-protein coding RNA 2089
chr19	883599	884070	472	*	Peak_62796	46	.	Promoter (1-2kb)	19	867963	885909	17947	2	10025	ENST00000607471.5	1839	ENSG00000175221	MED16	mediator complex subunit 16
chr13	52084386	52084700	315	*	Peak_63473	45	.	Intron (ENST00000647945.1/341676, intron 16 of 24)	13	52037080	52127482	90403	2	341676	ENST00000465811.7	42782	ENSG00000197168	NEK5	NIMA related kinase 5
chr16	58604162	58604483	322	*	Peak_64754	44	.	Intron (ENST00000317147.9/23019, intron 1 of 48)	16	58576465	58599337	22873	2	23019	ENST00000628857.1	-4825	ENSG00000125107	CNOT1	CCR4-NOT transcription complex subunit 1
chr19	10911201	10911546	346	*	Peak_65004	44	.	Intron (ENST00000327064.8/10498, intron 4 of 15)	19	10918986	10920870	1885	1	10498	ENST00000586508.1	-7440	ENSG00000142453	CARM1	coactivator associated arginine methyltransferase 1
chr5	149362567	149363021	455	*	Peak_65171	44	.	Promoter (<=1kb)	5	149363069	149369653	6585	1	78991	ENST00000507621.1	-48	ENSG00000145882	PCYOX1L	prenylcysteine oxidase 1 like
chr12	131725128	131725369	242	*	Peak_65508	44	.	Promoter (1-2kb)	12	131726989	131753489	26501	1	6433	ENST00000535202.1	-1620	ENSG00000061936	SFSWAP	splicing factor SWAP
chr12	53132588	53133018	431	*	Peak_66069	43	.	Distal Intergenic	12	53103531	53124350	20820	1	8435	ENST00000542365.1	29057	ENSG00000167780	SOAT2	sterol O-acyltransferase 2
chr1	32038005	32038406	402	*	Peak_66101	43	.	Exon (ENST00000327300.11/10657, exon 6 of 9)	1	32014182	32060850	46669	1	10657	ENST00000484270.2	23823	ENSG00000121774	KHDRBS1	KH RNA binding domain containing, signal transduction associated 1
chr19	35104434	35104870	437	*	Peak_66343	43	.	Promoter (1-2kb)	19	35059059	35106304	47246	2	100128675	ENST00000392227.2	1434	ENSG00000227392	HPN-AS1	HPN antisense RNA 1
chr5	177273958	177274513	556	*	Peak_68198	42	.	Intron (ENST00000354179.8/64324, intron 18 of 23)	5	177266587	177273678	7092	1	64324	ENST00000515735.1	7371	ENSG00000165671	NSD1	nuclear receptor binding SET domain protein 1
chr1	19041582	19042079	498	*	Peak_67712	42	.	Distal Intergenic	1	19074567	19077827	3261	2	23352	ENST00000486515.1	35748	ENSG00000127481	UBR4	ubiquitin protein ligase E3 component n-recognin 4
chr22	38088112	38088470	359	*	Peak_68067	42	.	Promoter (<=1kb)	22	38085165	38088938	3774	2	80115	ENST00000428572.1	468	ENSG00000128298	BAIAP2L2	BAI1 associated protein 2 like 2
chr2	162490799	162491104	306	*	Peak_68049	42	.	Intron (ENST00000618399.4/90134, intron 5 of 14)	2	162501985	162528360	26376	2	90134	ENST00000477019.1	37256	ENSG00000184611	KCNH7	potassium voltage-gated channel subfamily H member 7
chr2	27311316	27311770	455	*	Peak_68075	42	.	Promoter (<=1kb)	2	27309492	27312453	2962	2	4358	ENST00000620797.4	683	ENSG00000115204	MPV17	mitochondrial inner membrane protein MPV17
chr7	66082760	66083170	411	*	Peak_68289	42	.	Exon (ENST00000304874.13/435, exon 5 of 17)	7	66087693	66092921	5229	1	435	ENST00000493708.5	-4523	ENSG00000126522	ASL	argininosuccinate lyase
chr11	88833182	88833557	376	*	Peak_69007	42	.	Intron (ENST00000455756.6/2915, intron 3 of 8)	11	88911936	89047370	135435	2	2915	ENST00000449371.6	213813	ENSG00000168959	GRM5	glutamate metabotropic receptor 5
chr4	702507	702958	452	*	Peak_70153	41	.	Promoter (2-3kb)	4	705748	734943	29196	1	10336	ENST00000419774.5	-2790	ENSG00000185619	PCGF3	polycomb group ring finger 3
chr6	71553976	71554352	377	*	Peak_76158	40	.	Distal Intergenic	6	71450834	71458874	8041	1	102724000	ENST00000431997.2	103142	NA	LINC01626	long intergenic non-protein coding RNA 1626
chr11	72047357	72047842	486	*	Peak_76260	40	.	Intron (ENST00000351960.10/4926, intron 2 of 24)	11	72019556	72042142	22587	2	4926	ENST00000543009.5	-5215	ENSG00000137497	NUMA1	nuclear mitotic apparatus protein 1
chr8	48057154	48057520	367	*	Peak_77135	40	.	Intron (ENST00000523111.6/7336, intron 3 of 3)	8	48049580	48061315	11736	1	7336	ENST00000521628.1	7574	ENSG00000169139	UBE2V2	ubiquitin conjugating enzyme E2 V2
chr12	52377751	52378194	444	*	Peak_76995	40	.	3' UTR	12	52377812	52385652	7841	2	3890	ENST00000257951.3	7458	ENSG00000161849	KRT84	keratin 84
chr5	159810316	159810631	316	*	Peak_79129	38	.	Intron (ENST00000641163.1/101927766, intron 3 of 7)	5	159776772	159871384	94613	2	101927766	ENST00000522627.1	60753	ENSG00000253311	LINC01847	long intergenic non-protein coding RNA 1847
chr7	151142796	151143239	444	*	Peak_79171	38	.	Intron (ENST00000463381.5/116988, intron 14 of 15)	7	151139568	151144432	4865	1	116988	ENST00000473633.1	3228	ENSG00000133612	AGAP3	ArfGAP with GTPase domain, ankyrin repeat and PH domain 3
chr3	13144109	13144928	820	*	Peak_80459	37	.	Intron (ENST00000648114.1/9922, intron 2 of 15)	3	12900849	13073117	172269	2	9922	ENST00000613206.1	-70992	ENSG00000144711	IQSEC1	IQ motif and Sec7 domain 1
chr1	46636945	46637290	346	*	Peak_80560	37	.	Intron (ENST00000576409.5/64756, intron 8 of 8)	1	46633678	46645256	11579	2	64756	ENST00000492233.5	7966	ENSG00000123472	ATPAF1	ATP synthase mitochondrial F1 complex assembly factor 1
chr5	89897176	89897561	386	*	Peak_81295	37	.	Distal Intergenic	5	90016621	90016720	100	2	100500825	ENST00000584845.3	119159	ENSG00000264342	MIR3660	microRNA 3660
chr4	4983568	4984008	441	*	Peak_81227	37	.	Distal Intergenic	4	5014827	5019437	4611	2	54360	ENST00000506508.1	35429	ENSG00000170891	CYTL1	cytokine like 1
chr2	6110773	6111219	447	*	Peak_81913	37	.	Distal Intergenic	2	5982571	6001275	18705	1	400940	ENST00000450794.1	128202	NA	LOC400940	uncharacterized LOC400940
chr16	57022254	57022488	235	*	Peak_82049	36	.	Promoter (1-2kb)	16	57020713	57083519	62807	1	84166	ENST00000539144.5	1541	ENSG00000140853	NLRC5	NLR family CARD domain containing 5
chr9	120966534	120966791	258	*	Peak_83856	36	.	Intron (ENST00000223642.2/727, intron 33 of 40)	9	120956961	120962707	5747	2	727	ENST00000480188.1	-3827	ENSG00000106804	C5	complement C5
chr10	47176204	47176470	267	*	Peak_84753	35	.	Distal Intergenic	10	47300386	47313547	13162	1	2662	ENST00000580279.1	-123916	ENSG00000266524	GDF10	growth differentiation factor 10
chr9	129636976	129637573	598	*	Peak_89877	34	.	3' UTR	9	129636892	129642124	5233	2	140459	ENST00000277459.8	4551	ENSG00000148331	ASB6	ankyrin repeat and SOCS box containing 6
chr13	37528146	37528516	371	*	Peak_92861	32	.	Distal Intergenic	13	37534940	37551536	16597	1	400121	ENST00000612438.1	-6424	ENSG00000275226	LINC00547	long intergenic non-protein coding RNA 547

## Sheet: UV2_filter.PeakAnno
seqnames	start	end	width	strand	V4	V5	V6	annotation	geneChr	geneStart	geneEnd	geneLength	geneStrand	geneId	transcriptId	distanceToTSS	ENSEMBL	SYMBOL	GENENAME
chr20	49277858	49287989	10132	*	Peak_1	1000	.	Promoter (<=1kb)	20	49280319	49280409	91	1	100113393	ENST00000410433.1	0	ENSG00000222365	SNORD12B	small nucleolar RNA, C/D box 12B
chr9	135683890	135685108	1219	*	Peak_4	1000	.	Distal Intergenic	9	135693407	135699528	6122	2	402381	ENST00000298466.9	14420	ENSG00000165643	SOHLH1	spermatogenesis and oogenesis specific basic helix-loop-helix 1
chr2	120779254	120780579	1326	*	Peak_5	1000	.	Intron (ENST00000482119.5/2736, intron 1 of 3)	2	120792283	120991380	199098	1	2736	ENST00000341310.10	-11704	ENSG00000074047	GLI2	GLI family zinc finger 2
chr20	49288203	49291095	2893	*	Peak_6	1000	.	Exon (ENST00000371743.7/441951, exon 5 of 5)	20	49280683	49280772	90	1	692057	ENST00000391002.1	7520	ENSG00000212304	SNORD12	small nucleolar RNA, C/D box 12
chr5	177390336	177391371	1036	*	Peak_8	1000	.	Promoter (<=1kb)	5	177389647	177398840	9194	1	6569	ENST00000513614.1	689	ENSG00000131183	SLC34A1	solute carrier family 34 member 1
chr11	115830048	115832620	2573	*	Peak_13	1000	.	Intron (ENST00000539305.1/ENST00000539305.1, intron 2 of 2)	11	115757451	115760627	3177	2	283143	ENST00000501294.1	-69421	NA	LINC00900	long intergenic non-protein coding RNA 900
chr20	34548943	34550450	1508	*	Peak_19	947	.	Promoter (2-3kb)	20	34546854	34560345	13492	1	84557	ENST00000374837.7	2089	ENSG00000101460	MAP1LC3A	microtubule associated protein 1 light chain 3 alpha
chr11	14952655	14953974	1320	*	Peak_20	945	.	Intron (ENST00000523376.5/797, intron 5 of 9)	11	14966671	14970016	3346	2	796	ENST00000494746.1	16042	ENSG00000110680	CALCA	calcitonin related polypeptide alpha
chr11	10943521	10944633	1113	*	Peak_29	836	.	Distal Intergenic	11	10865261	10906802	41542	1	729013	ENST00000530344.1	78260	ENSG00000247271	ZBED5-AS1	ZBED5 antisense RNA 1
chr8	98612497	98613568	1072	*	Peak_32	819	.	Intron (ENST00000617590.1/6788, intron 4 of 8)	8	98594973	98602276	7304	2	6788	ENST00000520653.1	-10221	ENSG00000104375	STK3	serine/threonine kinase 3
chr1	28898247	28899629	1383	*	Peak_40	778	.	Intron (ENST00000642260.1/2035, intron 1 of 20)	1	28893741	29120046	226306	1	2035	ENST00000373798.5	4506	ENSG00000159023	EPB41	erythrocyte membrane protein band 4.1
chr8	104304449	104305612	1164	*	Peak_43	749	.	Distal Intergenic	8	104339087	104348674	9588	1	81501	ENST00000519562.1	-33475	ENSG00000164935	DCSTAMP	dendrocyte expressed seven transmembrane protein
chr17	45716529	45717470	942	*	Peak_50	718	.	Intron (ENST00000634540.1/104909134, intron 3 of 14)	17	45784280	45835827	51548	1	1394	ENST00000293493.11	-66810	ENSG00000120088	CRHR1	corticotropin releasing hormone receptor 1
chr7	98137432	98138823	1392	*	Peak_54	702	.	Exon (ENST00000297293.5/22853, exon 2 of 14)	7	98126565	98151455	24891	1	22853	ENST00000493372.1	10867	ENSG00000164715	LMTK2	lemur tyrosine kinase 2
chr3	153421616	153422998	1383	*	Peak_56	693	.	Intron (ENST00000493214.2/105374165, intron 5 of 6)	3	153440859	153502693	61835	1	152118	ENST00000648073.1	-17861	ENSG00000237787	C3orf79	chromosome 3 open reading frame 79
chr2	167970690	167971686	997	*	Peak_59	690	.	Intron (ENST00000487143.5/27347, intron 7 of 8)	2	167815053	167941144	126092	2	105616981	ENST00000436982.2	-29546	NA	LOC105616981	uncharacterized LOC105616981
chr1	103280700	103282135	1436	*	Peak_67	652	.	Distal Intergenic	1	103001079	103108872	107794	2	1301	ENST00000645458.1	-171828	ENSG00000060718	COL11A1	collagen type XI alpha 1 chain
chr4	3509957	3511022	1066	*	Peak_69	649	.	3' UTR	4	3512933	3532149	19217	2	4043	ENST00000296325.9	21127	ENSG00000163956	LRPAP1	LDL receptor related protein associated protein 1
chr11	45865526	45866698	1173	*	Peak_78	634	.	Promoter (<=1kb)	11	45867428	45869723	2296	1	1408	ENST00000496667.1	-730	ENSG00000121671	CRY2	cryptochrome circadian regulator 2
chr12	29600270	29601577	1308	*	Peak_81	620	.	Promoter (2-3kb)	12	29568721	29604224	35504	2	83857	ENST00000550354.1	2647	ENSG00000133687	TMTC1	transmembrane and tetratricopeptide repeat containing 1
chr18	50266292	50267615	1324	*	Peak_89	607	.	Promoter (<=1kb)	18	50227193	50266522	39330	2	220136	ENST00000398545.4	0	ENSG00000172361	CFAP53	cilia and flagella associated protein 53
chr2	214674595	214676184	1590	*	Peak_91	606	.	Intron (ENST00000412896.5/ENST00000412896.5, intron 2 of 3)	2	214728538	214730508	1971	2	580	ENST00000432456.5	54324	ENSG00000138376	BARD1	BRCA1 associated RING domain 1
chr2	106913982	106915190	1209	*	Peak_97	602	.	Distal Intergenic	2	106813076	106887108	74033	2	84620	ENST00000409087.3	-26874	ENSG00000144057	ST6GAL2	ST6 beta-galactoside alpha-2,6-sialyltransferase 2
chr3	82536562	82537779	1218	*	Peak_107	585	.	Distal Intergenic	3	81986152	82202454	216303	1	105377180	ENST00000494340.1	550410	ENSG00000239440	LINC02008	long intergenic non-protein coding RNA 2008
chr11	78231435	78232669	1235	*	Peak_115	575	.	Promoter (<=1kb)	11	78226620	78231932	5313	2	9846	ENST00000528329.1	0	ENSG00000033327	GAB2	GRB2 associated binding protein 2
chr17	38874382	38875674	1293	*	Peak_119	571	.	Promoter (<=1kb)	17	38873890	38915141	41252	1	3927	ENST00000419929.1	492	ENSG00000002834	LASP1	LIM and SH3 protein 1
chr21	43714919	43716439	1521	*	Peak_126	558	.	Promoter (2-3kb)	21	43719094	43738861	19768	1	8566	ENST00000398081.5	-2655	ENSG00000160209	PDXK	pyridoxal kinase
chr7	15128687	15129677	991	*	Peak_134	551	.	Distal Intergenic	7	14736138	14974777	238640	2	1607	ENST00000437998.1	-153910	ENSG00000136267	DGKB	diacylglycerol kinase beta
chr12	115780994	115781838	845	*	Peak_138	547	.	Intron (ENST00000549163.1/ENST00000549163.1, intron 2 of 2)	12	115959616	115963549	3934	2	23389	ENST00000649937.1	181711	ENSG00000123066	MED13L	mediator complex subunit 13L
chr7	43005595	43006487	893	*	Peak_162	524	.	Intron (ENST00000585996.5/ENST00000585996.5, intron 2 of 2)	7	42935043	42948958	13916	1	64983	ENST00000496564.1	70552	ENSG00000106591	MRPL32	mitochondrial ribosomal protein L32
chr7	1041563	1042672	1110	*	Peak_171	520	.	Promoter (1-2kb)	7	1044576	1058461	13886	1	115330	ENST00000444847.1	-1904	ENSG00000164849	GPR146	G protein-coupled receptor 146
chr5	150763840	150765220	1381	*	Peak_184	503	.	Distal Intergenic	5	150708440	150759109	50670	2	51164	ENST00000447998.6	-4731	ENSG00000132912	DCTN4	dynactin subunit 4
chr15	89832720	89834131	1412	*	Peak_198	498	.	3' UTR	15	89835424	89837954	2531	2	10239	ENST00000558926.1	3823	ENSG00000157823	AP3S2	adaptor related protein complex 3 subunit sigma 2
chr9	37484822	37485699	878	*	Peak_217	484	.	Promoter (<=1kb)	9	37485935	37503697	17763	1	64425	ENST00000377798.8	-236	ENSG00000137054	POLR1E	RNA polymerase I subunit E
chr19	4034994	4035854	861	*	Peak_219	482	.	Intron (ENST00000262971.2/51588, intron 9 of 10)	19	4028461	4028814	354	1	51588	ENST00000601439.1	6533	ENSG00000105229	PIAS4	protein inhibitor of activated STAT 4
chr8	136694852	136695955	1104	*	Peak_238	475	.	Intron (ENST00000650470.1/107986980, intron 4 of 4)	8	136780853	136810037	29185	1	107986980	ENST00000521090.5	-84898	ENSG00000254101	LINC02055	long intergenic non-protein coding RNA 2055
chr22	19995024	19996075	1052	*	Peak_244	472	.	Intron (ENST00000263207.7/421, intron 2 of 19)	22	19971228	19990794	19567	2	421	ENST00000406259.1	-4230	ENSG00000099889	ARVCF	ARVCF delta catenin family member
chr3	120222059	120222924	866	*	Peak_247	472	.	Intron (ENST00000495912.5/165829, intron 2 of 3)	3	120166958	120244116	77159	2	165829	ENST00000461057.1	21192	ENSG00000175697	GPR156	G protein-coupled receptor 156
chr11	1095088	1095897	810	*	Peak_251	468	.	Exon (ENST00000361558.7/4583, exon 30 of 49)	11	1102455	1103456	1002	1	4583	ENST00000616479.1	-6558	ENSG00000198788	MUC2	mucin 2, oligomeric mucus/gel-forming
chr17	74290295	74291499	1205	*	Peak_274	460	.	3' UTR	17	74281512	74314884	33373	1	64446	ENST00000579490.5	8783	ENSG00000171595	DNAI2	dynein axonemal intermediate chain 2
chr11	827340	828665	1326	*	Peak_284	453	.	Promoter (<=1kb)	11	827578	831986	4409	1	283229	ENST00000528542.6	0	ENSG00000177685	CRACR2B	calcium release activated channel regulator 2B
chr20	33354510	33355927	1418	*	Peak_294	450	.	Downstream (2-3kb)	20	33358841	33373359	14519	2	51654	ENST00000461710.5	17432	ENSG00000101391	CDK5RAP1	CDK5 regulatory subunit associated protein 1
chr18	46474626	46475747	1122	*	Peak_327	437	.	Downstream (1-2kb)	18	46447447	46456067	8621	1	494470	ENST00000592777.1	27179	ENSG00000141622	RNF165	ring finger protein 165
chr5	122876956	122877961	1006	*	Peak_334	432	.	Intron (ENST00000513613.5/28966, intron 1 of 4)	5	122845663	123007782	162120	1	28966	ENST00000511545.5	31293	ENSG00000064652	SNX24	sorting nexin 24
chr11	76640960	76642198	1239	*	Peak_384	410	.	Distal Intergenic	11	76657570	76665971	8402	2	2615	ENST00000464145.1	23773	ENSG00000137507	LRRC32	leucine rich repeat containing 32
chr20	16860543	16861753	1211	*	Peak_421	399	.	Intron (ENST00000422574.1/ENST00000422574.1, intron 1 of 2)	20	16749360	16751782	2423	1	56914	ENST00000486129.1	111183	ENSG00000125879	OTOR	otoraplin
chr11	61550461	61551541	1081	*	Peak_424	398	.	Exon (ENST00000263846.8/9066, exon 3 of 9)	11	61523900	61533103	9204	2	9066	ENST00000540831.1	-17358	ENSG00000011347	SYT7	synaptotagmin 7
chr8	81683109	81683944	836	*	Peak_428	397	.	Promoter (1-2kb)	8	81660514	81685832	25319	2	3612	ENST00000523942.5	1888	ENSG00000133731	IMPA1	inositol monophosphatase 1
chr9	131570872	131571453	582	*	Peak_430	396	.	Distal Intergenic	9	131523801	131531268	7468	2	83549	ENST00000372215.4	-39604	ENSG00000130717	UCK1	uridine-cytidine kinase 1
chrX	833372	834649	1278	*	Peak_433	395	.	Distal Intergenic	23	630807	659411	28605	1	6473	ENST00000381575.6	202565	ENSG00000185960	SHOX	short stature homeobox
chr10	58582073	58582952	880	*	Peak_463	384	.	Intron (ENST00000373886.7/80114, intron 1 of 20)	10	58620849	58650867	30019	1	80114	ENST00000476684.1	-37897	ENSG00000122870	BICC1	BicC family RNA binding protein 1
chr16	22082673	22083731	1059	*	Peak_468	383	.	3' UTR	16	22092538	22110912	18375	1	146177	ENST00000562340.5	-8807	ENSG00000175267	VWA3A	von Willebrand factor A domain containing 3A
chr9	79795912	79796523	612	*	Peak_472	383	.	Distal Intergenic	9	79708593	79722601	14009	1	7091	ENST00000478290.2	87319	ENSG00000106829	TLE4	TLE family member 4, transcriptional corepressor
chr22	38272939	38274119	1181	*	Peak_521	371	.	Promoter (<=1kb)	22	38219291	38273034	53744	2	25829	ENST00000361906.7	0	ENSG00000198792	TMEM184B	transmembrane protein 184B
chr6	42157678	42158576	899	*	Peak_551	365	.	Promoter (2-3kb)	6	42155446	42180054	24609	1	2978	ENST00000394237.5	2232	ENSG00000048545	GUCA1A	guanylate cyclase activator 1A
chr17	73953682	73954705	1024	*	Peak_571	360	.	Distal Intergenic	17	73750330	73828520	78191	2	283982	ENST00000544677.1	-125162	NA	LINC00469	long intergenic non-protein coding RNA 469
chr21	35746824	35747934	1111	*	Peak_603	353	.	Intron (ENST00000475045.6/101928269, intron 6 of 12)	21	35720715	35720808	94	1	768219	ENST00000390235.1	26109	ENSG00000211590	MIR802	microRNA 802
chr15	25220823	25222150	1328	*	Peak_652	343	.	Promoter (<=1kb)	15	25222348	25222428	81	1	100036565	ENST00000363931.1	-198	ENSG00000200801	SNORD115-28	small nucleolar RNA, C/D box 115-28
chr11	15327578	15328621	1044	*	Peak_660	342	.	Distal Intergenic	11	15235145	15246318	11174	1	387755	ENST00000526102.1	92433	ENSG00000188487	INSC	INSC spindle orientation adaptor protein
chr8	128380164	128381019	856	*	Peak_663	342	.	Distal Intergenic	8	128406261	128415381	9121	2	101927774	ENST00000517583.1	34362	NA	LINC00824	long intergenic non-protein coding RNA 824
chr20	34042989	34043867	879	*	Peak_770	324	.	Intron (ENST00000375114.7/22913, intron 2 of 8)	20	34049119	34049190	72	1	100616434	ENST00000583905.1	-5252	ENSG00000264616	MIR4755	microRNA 4755
chr17	74465845	74466731	887	*	Peak_775	323	.	Promoter (<=1kb)	17	74466399	74484794	18396	1	11314	ENST00000648095.1	0	ENSG00000167851	CD300A	CD300a molecule
chr9	133099473	133100323	851	*	Peak_789	323	.	Promoter (<=1kb)	9	133098638	133100545	1908	2	5900	ENST00000495621.1	222	ENSG00000160271	RALGDS	ral guanine nucleotide dissociation stimulator
chr22	16551403	16551969	567	*	Peak_799	322	.	Distal Intergenic	22	16590751	16592810	2060	2	150160	ENST00000359963.4	40841	ENSG00000198445	CCT8L2	chaperonin containing TCP1 subunit 8 like 2
chr14	62966361	62967237	877	*	Peak_793	322	.	Intron (ENST00000322893.11/27133, intron 6 of 10)	14	62707567	63045186	337620	2	27133	ENST00000420622.6	77949	ENSG00000140015	KCNH5	potassium voltage-gated channel subfamily H member 5
chr1	2517504	2518182	679	*	Peak_810	321	.	Promoter (1-2kb)	1	2514433	2519295	4863	2	55229	ENST00000468002.2	1113	ENSG00000157881	PANK4	pantothenate kinase 4
chr12	107893333	107894306	974	*	Peak_836	317	.	Distal Intergenic	12	107903270	107903948	679	2	728739	ENST00000547904.1	9642	NA	LOC728739	programmed cell death 2 pseudogene
chr16	57894395	57895477	1083	*	Peak_838	317	.	Intron (ENST00000251102.12/1258, intron 31 of 32)	16	57884368	57901373	17006	2	1258	ENST00000565942.1	5896	ENSG00000070729	CNGB1	cyclic nucleotide gated channel beta 1
chr4	16924084	16925408	1325	*	Peak_852	316	.	Distal Intergenic	4	16501541	16898809	397269	2	9079	ENST00000304523.9	-25275	ENSG00000169744	LDB2	LIM domain binding 2
chr14	96189505	96189944	440	*	Peak_894	310	.	Distal Intergenic	14	96204679	96244166	39488	1	624	ENST00000542454.2	-14735	ENSG00000168398	BDKRB2	bradykinin receptor B2
chr6	118315624	118316564	941	*	Peak_936	306	.	3' UTR	6	118154442	118317676	163235	1	222553	ENST00000621341.1	161182	ENSG00000196376	SLC35F1	solute carrier family 35 member F1
chr12	53318353	53319076	724	*	Peak_969	300	.	Promoter (2-3kb)	12	53309650	53321208	11559	2	8086	ENST00000547238.5	2132	ENSG00000094914	AAAS	aladin WD repeat nucleoporin
chr9	126976096	126976983	888	*	Peak_980	299	.	Intron (ENST00000424082.6/9649, intron 3 of 17)	9	126962225	127217812	255588	1	9649	ENST00000373434.5	13871	ENSG00000136828	RALGPS1	Ral GEF with PH domain and SH3 binding motif 1
chr2	44831969	44832645	677	*	Peak_993	299	.	Distal Intergenic	2	44929977	44935359	5383	2	107985879	ENST00000430847.2	102714	ENSG00000259439	LINC01833	long intergenic non-protein coding RNA 1833
chr12	91406026	91406987	962	*	Peak_987	299	.	Distal Intergenic	12	91140484	91183123	42640	2	1634	ENST00000052754.9	-222903	ENSG00000011465	DCN	decorin
chr19	46885176	46886226	1051	*	Peak_1010	298	.	Distal Intergenic	19	46918676	47004307	85632	1	2909	ENST00000614079.1	-32450	ENSG00000160007	ARHGAP35	Rho GTPase activating protein 35
chr17	50138816	50139375	560	*	Peak_1014	297	.	Exon (ENST00000612501.1/84687, exon 7 of 10)	17	50139460	50145152	5693	2	84687	ENST00000513579.1	5777	ENSG00000108819	PPP1R9B	protein phosphatase 1 regulatory subunit 9B
chr8	54277781	54278912	1132	*	Peak_1115	286	.	Distal Intergenic	8	54330687	54330895	209	1	26766	ENST00000362342.1	-51775	ENSG00000199212	RNU105C	RNA, U105C small nucleolar
chr20	35191585	35192362	778	*	Peak_1186	278	.	Intron (ENST00000635377.1/10544, intron 3 of 3)	20	35176353	35216240	39888	1	10544	ENST00000634509.1	15232	ENSG00000101000	PROCR	protein C receptor
chr3	176476970	176477495	526	*	Peak_1235	275	.	Distal Intergenic	3	176515103	176515151	49	1	102465858	ENST00000636162.1	-37608	ENSG00000283333	MIR7977	microRNA 7977
chr20	51076625	51077010	386	*	Peak_1293	269	.	Distal Intergenic	20	51003656	51023129	19474	2	3755	ENST00000371571.4	-53496	ENSG00000026559	KCNG1	potassium voltage-gated channel modifier subfamily G member 1
chr22	43770839	43771237	399	*	Peak_1366	264	.	Intron (ENST00000396231.6/64800, intron 2 of 29)	22	43528744	43812190	283447	2	64800	ENST00000396231.6	40953	ENSG00000186976	EFCAB6	EF-hand calcium binding domain 6
chr10	58228825	58229518	694	*	Peak_1352	264	.	Intron (ENST00000373935.3/253430, intron 2 of 5)	10	58191517	58267934	76418	2	253430	ENST00000373935.3	38416	ENSG00000151151	IPMK	inositol polyphosphate multikinase
chr7	155409859	155410538	680	*	Peak_1390	263	.	Distal Intergenic	7	155382076	155396356	14281	1	100286906	ENST00000401499.1	27783	NA	LOC100286906	uncharacterized LOC100286906
chr3	45183048	45184229	1182	*	Peak_1438	258	.	Distal Intergenic	3	45110216	45146422	36207	2	64866	ENST00000425231.2	-36626	ENSG00000163814	CDCP1	CUB domain containing protein 1
chr1	16927137	16927848	712	*	Peak_1459	256	.	Promoter (2-3kb)	1	16930135	16946405	16271	1	9696	ENST00000492631.5	-2287	ENSG00000058453	CROCC	ciliary rootlet coiled-coil, rootletin
chr2	119544012	119544878	867	*	Peak_1495	255	.	Promoter (<=1kb)	2	119544432	119656661	112230	1	200373	ENST00000295220.10	0	ENSG00000163075	CFAP221	cilia and flagella associated protein 221
chr17	58503606	58504179	574	*	Peak_1503	254	.	Exon (ENST00000579925.5/9110, exon 14 of 18)	17	58508322	58508876	555	2	9110	ENST00000583966.1	4697	ENSG00000108389	MTMR4	myotubularin related protein 4
chr21	38070304	38071151	848	*	Peak_1528	253	.	Intron (ENST00000645093.1/3763, intron 2 of 4)	21	38093244	38121331	28088	2	10281	ENST00000482032.1	50180	ENSG00000184029	DSCR4	Down syndrome critical region 4
chr9	127412978	127413756	779	*	Peak_1529	253	.	Distal Intergenic	9	127404049	127405447	1399	1	29988	ENST00000485806.1	8929	ENSG00000136856	SLC2A8	solute carrier family 2 member 8
chr8	115209727	115210816	1090	*	Peak_1588	252	.	Distal Intergenic	8	115414429	115492221	77793	2	7227	ENST00000518018.1	281405	ENSG00000104447	TRPS1	transcriptional repressor GATA binding 1
chr8	22216844	22217980	1137	*	Peak_1591	251	.	Downstream (1-2kb)	8	22221458	22227693	6236	2	9796	ENST00000523252.1	9713	ENSG00000168490	PHYHIP	phytanoyl-CoA 2-hydroxylase interacting protein
chr3	60651254	60652123	870	*	Peak_1659	245	.	Intron (ENST00000476844.5/2272, intron 4 of 9)	3	60617805	60617870	66	2	103504735	ENST00000626714.1	-33384	ENSG00000281426	MIR548BB	microRNA 548bb
chr3	14254819	14255981	1163	*	Peak_1753	241	.	Distal Intergenic	3	14145147	14178783	33637	2	7508	ENST00000285021.11	-76036	ENSG00000154767	XPC	XPC complex subunit, DNA damage recognition and repair factor
chr2	3747066	3748002	937	*	Peak_1777	239	.	Intron (ENST00000399143.8/728597, intron 4 of 10)	2	3725946	3788532	62587	1	728597	ENST00000537457.1	21120	ENSG00000214866	DCDC2C	doublecortin domain containing 2C
chr1	226977387	226978378	992	*	Peak_1780	239	.	Promoter (<=1kb)	1	226977404	226987544	10141	1	56997	ENST00000485462.5	0	ENSG00000163050	COQ8A	coenzyme Q8A
chr6	73182630	73183451	822	*	Peak_1824	236	.	Intron (ENST00000342056.6/56479, intron 12 of 14)	6	73134803	73143514	8712	2	100873997	ENST00000429832.1	-39116	ENSG00000229154	KCNQ5-AS1	KCNQ5 antisense RNA 1
chr1	14465996	14466555	560	*	Peak_1853	235	.	Intron (ENST00000636203.1/23254, intron 2 of 16)	1	14348955	14391575	42621	2	105376762	ENST00000447908.2	-74421	NA	KAZN-AS1	KAZN antisense RNA 1
chr1	232564305	232565216	912	*	Peak_1894	234	.	Promoter (2-3kb)	1	232397965	232561558	163594	2	57568	ENST00000366630.5	-2747	ENSG00000116991	SIPA1L2	signal induced proliferation associated 1 like 2
chr6	147744932	147745743	812	*	Peak_1970	231	.	Intron (ENST00000427015.1/ENST00000427015.1, intron 1 of 2)	6	147509226	147737547	228322	1	389432	ENST00000566741.1	235706	ENSG00000203727	SAMD5	sterile alpha motif domain containing 5
chrX	85964617	85965217	601	*	Peak_1978	231	.	Intron (ENST00000357749.6/1121, intron 4 of 14)	23	85978656	85981809	3154	2	1121	ENST00000487515.1	16592	ENSG00000188419	CHM	CHM Rab escort protein
chr12	3960337	3960692	356	*	Peak_2077	224	.	Distal Intergenic	12	3808861	3873448	64588	2	57097	ENST00000447133.7	-86889	ENSG00000111224	PARP11	poly(ADP-ribose) polymerase family member 11
chr1	44017623	44018367	745	*	Peak_2131	221	.	Promoter (<=1kb)	1	44014630	44017340	2711	2	6536	ENST00000533007.1	-283	ENSG00000196517	SLC6A9	solute carrier family 6 member 9
chr9	35666374	35667147	774	*	Peak_2160	220	.	Promoter (1-2kb)	9	35659344	35665287	5944	2	84904	ENST00000378387.3	-1087	ENSG00000137135	ARHGEF39	Rho guanine nucleotide exchange factor 39
chr9	33353845	33354499	655	*	Peak_2242	218	.	Exon (ENST00000379540.7/4799, exon 18 of 24)	9	33365233	33367578	2346	1	4799	ENST00000463421.1	-10734	ENSG00000086102	NFX1	nuclear transcription factor, X-box binding 1
chr9	137458844	137459511	668	*	Peak_2260	216	.	Promoter (<=1kb)	9	137447573	137459334	11762	2	26012	ENST00000371473.7	0	ENSG00000165802	NSMF	NMDA receptor synaptonuclear signaling and neuronal migration factor
chr18	48491706	48492072	367	*	Peak_2379	211	.	Distal Intergenic	18	48539046	48863217	324172	1	9811	ENST00000256413.7	-46974	ENSG00000134030	CTIF	cap binding complex dependent translation initiation factor
chr10	127705152	127705655	504	*	Peak_2415	209	.	Distal Intergenic	10	127737235	127741186	3952	1	399823	ENST00000388920.4	-31580	ENSG00000186766	FOXI2	forkhead box I2
chr1	91654069	91654912	844	*	Peak_2495	208	.	Distal Intergenic	1	91695490	91712363	16874	2	7049	ENST00000470600.1	57451	ENSG00000069702	TGFBR3	transforming growth factor beta receptor 3
chr15	82080600	82081568	969	*	Peak_2522	206	.	Distal Intergenic	15	82088594	82097694	9101	1	101929690	ENST00000558082.1	-7026	ENSG00000259518	LINC01583	long intergenic non-protein coding RNA 1583
chr1	45507166	45508260	1095	*	Peak_2565	204	.	5' UTR	1	45500341	45511065	10725	1	25974	ENST00000616135.1	6825	ENSG00000132763	MMACHC	metabolism of cobalamin associated C
chr9	110892807	110893578	772	*	Peak_2636	202	.	Intron (ENST00000374431.7/1902, intron 4 of 4)	9	110873778	110999466	125689	2	1902	ENST00000374430.6	105888	ENSG00000198121	LPAR1	lysophosphatidic acid receptor 1
chr17	79499728	79500177	450	*	Peak_2709	199	.	Intron (ENST00000580155.5/146713, intron 1 of 14)	17	79094257	79508868	414612	2	146713	ENST00000584778.5	8691	ENSG00000167281	RBFOX3	RNA binding fox-1 homolog 3
chr10	97516814	97517506	693	*	Peak_2765	197	.	Intron (ENST00000370664.3/80019, intron 1 of 2)	10	97498868	97571209	72342	1	80019	ENST00000370664.3	17946	ENSG00000165886	UBTD1	ubiquitin domain containing 1
chr2	101218489	101219559	1071	*	Peak_2768	197	.	Intron (ENST00000463469.5/11138, intron 1 of 4)	2	101252802	101270316	17515	1	55571	ENST00000289382.7	-33243	ENSG00000158435	CNOT11	CCR4-NOT transcription complex subunit 11
chr20	49380293	49381116	824	*	Peak_2779	197	.	Intron (ENST00000637341.1/ENST00000637341.1, intron 2 of 7)	20	49374800	49387005	12206	2	3745	ENST00000635210.1	5889	ENSG00000158445	KCNB1	potassium voltage-gated channel subfamily B member 1
chr20	2455595	2456307	713	*	Peak_2802	196	.	Distal Intergenic	20	2461660	2470732	9073	2	6628	ENST00000474384.2	14425	ENSG00000125835	SNRPB	small nuclear ribonucleoprotein polypeptides B and B1
chr10	64262392	64263033	642	*	Peak_2895	193	.	Distal Intergenic	10	64825572	64826579	1008	1	305	ENST00000404883.2	-562539	NA	ANXA2P3	annexin A2 pseudogene 3
chr11	28440194	28441364	1171	*	Peak_2993	189	.	Intron (ENST00000532947.2/196074, intron 6 of 7)	11	28477481	28477548	68	2	102466876	ENST00000618032.1	36184	ENSG00000273912	MIR8068	microRNA 8068
chr9	19389518	19389895	378	*	Peak_3072	188	.	Intron (ENST00000648238.1/ENST00000648238.1, intron 1 of 1)	9	19375715	19380254	4540	2	6194	ENST00000380394.8	-9264	ENSG00000137154	RPS6	ribosomal protein S6
chr13	44866817	44867324	508	*	Peak_3198	184	.	Distal Intergenic	13	44799503	44809630	10128	2	144817	ENST00000414562.1	-57187	ENSG00000235097	LINC00330	long intergenic non-protein coding RNA 330
chr11	61618283	61618676	394	*	Peak_3194	184	.	Intron (ENST00000496593.5/113157, intron 1 of 4)	11	61615037	61636241	21205	1	113157	ENST00000478959.1	3246	ENSG00000243742	RPLP0P2	ribosomal protein lateral stalk subunit P0 pseudogene 2
chr8	47492308	47492979	672	*	Peak_3286	182	.	Intron (ENST00000297423.8/23514, intron 8 of 19)	8	47440401	47735916	295516	1	23514	ENST00000519401.5	51907	ENSG00000164808	SPIDR	scaffold protein involved in DNA repair
chr17	21419041	21420236	1196	*	Peak_3410	178	.	3' UTR	17	21405136	21417170	12035	1	3768	ENST00000331718.5	13905	ENSG00000184185	KCNJ12	potassium voltage-gated channel subfamily J member 12
chr12	109105378	109106072	695	*	Peak_3438	178	.	Intron (ENST00000242576.6/7374, intron 6 of 6)	12	109098151	109110992	12842	1	7374	ENST00000446767.2	7227	ENSG00000076248	UNG	uracil DNA glycosylase
chr11	77410297	77410689	393	*	Peak_3584	176	.	Promoter (1-2kb)	11	77323024	77411904	88881	2	5058	ENST00000528203.5	1215	ENSG00000149269	PAK1	p21 (RAC1) activated kinase 1
chr5	2996803	2997504	702	*	Peak_3600	176	.	Distal Intergenic	5	3177835	3181232	3398	1	102467074	ENST00000505396.2	-180331	ENSG00000249808	LINC01377	long intergenic non-protein coding RNA 1377
chr20	23073013	23073479	467	*	Peak_3596	176	.	Distal Intergenic	20	23079349	23086340	6992	2	22918	ENST00000246006.4	12861	ENSG00000125810	CD93	CD93 molecule
chr22	22262310	22262649	340	*	Peak_3670	173	.	Distal Intergenic	22	22244780	22245505	726	1	7441	ENST00000302273.2	17530	ENSG00000169575	VPREB1	V-set pre-B cell surrogate light chain 1
chr5	616715	617240	526	*	Peak_3687	173	.	Intron (ENST00000264935.5/55722, intron 1 of 11)	5	612272	653553	41282	1	55722	ENST00000264935.5	4443	ENSG00000112877	CEP72	centrosomal protein 72
chr17	24740179	24740417	239	*	Peak_3696	173	.	Distal Intergenic	17	22523111	22524663	1553	1	100462977	ENST00000540040.2	2217068	ENSG00000256618	MTRNR2L1	MT-RNR2 like 1
chr10	85632893	85633329	437	*	Peak_3716	171	.	Intron (ENST00000327946.11/2894, intron 13 of 15)	10	85601993	85613133	11141	2	2894	ENST00000552278.2	-19760	ENSG00000182771	GRID1	glutamate ionotropic receptor delta type subunit 1
chr5	81516307	81517066	760	*	Peak_3742	171	.	Promoter (2-3kb)	5	81419963	81513717	93755	2	23635	ENST00000512923.5	-2590	ENSG00000145687	SSBP2	single stranded DNA binding protein 2
chr2	213090088	213090491	404	*	Peak_3824	169	.	Intron (ENST00000451136.6/22807, intron 4 of 7)	2	213007353	213148629	141277	2	22807	ENST00000453575.5	58138	ENSG00000030419	IKZF2	IKAROS family zinc finger 2
chr18	49787338	49788066	729	*	Peak_3818	169	.	Promoter (<=1kb)	18	49783505	49786619	3115	2	10449	ENST00000591171.1	-719	ENSG00000167315	ACAA2	acetyl-CoA acyltransferase 2
chr11	101495666	101496389	724	*	Peak_4236	162	.	Intron (ENST00000344327.7/7225, intron 2 of 12)	11	101491381	101504090	12710	2	7225	ENST00000527240.1	7701	ENSG00000137672	TRPC6	transient receptor potential cation channel subfamily C member 6
chr6	70707665	70708171	507	*	Peak_4270	161	.	Intron (ENST00000316999.9/60682, intron 1 of 9)	6	70668530	70862011	193482	1	60682	ENST00000619054.4	39135	ENSG00000112305	SMAP1	small ArfGAP 1
chr13	27362968	27363744	777	*	Peak_4284	160	.	Distal Intergenic	13	27424544	27435688	11145	1	2971	ENST00000381140.8	-60800	ENSG00000122034	GTF3A	general transcription factor IIIA
chr1	50837852	50838154	303	*	Peak_4493	157	.	Intron (ENST00000396153.6/11124, intron 2 of 18)	1	50705784	50959738	253955	2	11124	ENST00000487898.1	121584	ENSG00000185104	FAF1	Fas associated factor 1
chr1	226577158	226577537	380	*	Peak_4543	156	.	Intron (ENST00000366789.5/375057, intron 1 of 3)	1	226548800	226609214	60415	1	375057	ENST00000366788.7	28358	ENSG00000203685	STUM	stum, mechanosensory transduction mediator homolog
chr7	94837375	94837932	558	*	Peak_4656	154	.	Distal Intergenic	7	94907202	94910332	3131	1	55607	ENST00000413325.1	-69270	ENSG00000158528	PPP1R9A	protein phosphatase 1 regulatory subunit 9A
chr17	38431218	38431639	422	*	Peak_4669	154	.	Promoter (2-3kb)	17	38428486	38510136	81651	1	57636	ENST00000620417.4	2732	ENSG00000275832	ARHGAP23	Rho GTPase activating protein 23
chr9	34106028	34106652	625	*	Peak_4687	153	.	Exon (ENST00000361264.8/25853, exon 4 of 9)	9	34089412	34093779	4368	2	25853	ENST00000466402.1	-12249	ENSG00000198876	DCAF12	DDB1 and CUL4 associated factor 12
chr13	42041593	42041973	381	*	Peak_4693	153	.	Promoter (1-2kb)	13	42040036	42229755	189720	1	160851	ENST00000379274.6	1557	ENSG00000102780	DGKH	diacylglycerol kinase eta
chr1	232012491	232013093	603	*	Peak_4748	152	.	Intron (ENST00000366637.8/27185, intron 11 of 12)	1	231925834	231945233	19400	1	104472714	ENST00000456782.1	86657	ENSG00000226758	DISC1-IT1	DISC1 intronic transcript 1
chr2	108448388	108448866	479	*	Peak_4790	151	.	Promoter (<=1kb)	2	108448561	108509398	60838	1	9648	ENST00000309863.10	0	ENSG00000135968	GCC2	GRIP and coiled-coil domain containing 2
chr2	6769218	6770378	1161	*	Peak_4846	151	.	Promoter (<=1kb)	2	6729168	6770311	41144	2	400941	ENST00000382045.3	0	ENSG00000205837	LINC00487	long intergenic non-protein coding RNA 487
chr8	75105359	75105821	463	*	Peak_4863	151	.	Distal Intergenic	8	75000174	75032841	32668	1	83690	ENST00000517786.1	105185	ENSG00000121005	CRISPLD1	cysteine rich secretory protein LCCL domain containing 1
chr16	67011876	67012446	571	*	Peak_4916	148	.	Distal Intergenic	16	67006523	67009418	2896	1	283848	ENST00000544478.1	5353	ENSG00000172824	CES4A	carboxylesterase 4A
chr16	55048903	55049241	339	*	Peak_4928	148	.	Exon (ENST00000650608.1/ENST00000650608.1, exon 1 of 3)	16	54932072	54934069	1998	1	10265	ENST00000558597.1	116831	ENSG00000176842	IRX5	iroquois homeobox 5
chr1	226321439	226321822	384	*	Peak_4926	148	.	Distal Intergenic	1	226231157	226309869	78713	2	286826	ENST00000366808.5	-11570	ENSG00000183814	LIN9	lin-9 DREAM MuvB core complex component
chr6	165526805	165527144	340	*	Peak_5064	148	.	Intron (ENST00000647989.1/10846, intron 3 of 22)	6	165327289	165503356	176068	2	10846	ENST00000649761.1	-23449	ENSG00000112541	PDE10A	phosphodiesterase 10A
chr1	175514120	175514598	479	*	Peak_5137	147	.	Intron (ENST00000367674.6/7143, intron 2 of 22)	1	175391428	175406364	14937	2	7143	ENST00000422274.2	-107756	ENSG00000116147	TNR	tenascin R
chr7	157753093	157753758	666	*	Peak_5361	143	.	Intron (ENST00000389413.7/5799, intron 11 of 21)	7	157854529	157857852	3324	1	100506585	ENST00000436151.5	-100771	NA	LOC100506585	uncharacterized LOC100506585
chr11	425291	425743	453	*	Peak_5499	141	.	Intron (ENST00000526142.5/338440, intron 5 of 10)	11	420929	421286	358	2	338440	ENST00000525804.1	-4005	ENSG00000185101	ANO9	anoctamin 9
chr1	52606578	52607076	499	*	Peak_5561	140	.	Exon (ENST00000361314.4/2882, exon 2 of 3)	1	52602400	52607408	5009	1	2882	ENST00000459779.1	4178	ENSG00000116157	GPX7	glutathione peroxidase 7
chr1	168724771	168725332	562	*	Peak_5574	139	.	Intron (ENST00000367817.3/1805, intron 1 of 3)	1	168695459	168729264	33806	2	1805	ENST00000367817.3	3932	ENSG00000143196	DPT	dermatopontin
chr21	14898268	14898799	532	*	Peak_5730	138	.	Intron (ENST00000432230.6/107987295, intron 1 of 3)	21	14852971	14881975	29005	2	107987295	ENST00000418954.2	-16293	NA	LINC02246	long intergenic non-protein coding RNA 2246
chr5	153283379	153283763	385	*	Peak_5789	138	.	Distal Intergenic	5	152620505	153223543	603039	2	101927134	ENST00000503048.1	-59836	ENSG00000249484	LINC01470	long intergenic non-protein coding RNA 1470
chr10	3759649	3760069	421	*	Peak_5637	138	.	Exon (ENST00000421629.2/ENST00000421629.2, exon 4 of 6)	10	3775996	3780217	4222	2	1316	ENST00000461124.1	20148	ENSG00000067082	KLF6	Kruppel like factor 6
chr5	149841637	149842215	579	*	Peak_5849	138	.	Intron (ENST00000360453.8/133522, intron 8 of 10)	5	149845643	149847757	2115	1	133522	ENST00000492495.1	-3428	ENSG00000155846	PPARGC1B	PPARG coactivator 1 beta
chr5	75320742	75321149	408	*	Peak_5874	137	.	Intron (ENST00000501886.2/ENST00000501886.2, intron 2 of 2)	5	75336329	75360758	24430	1	3156	ENST00000511206.5	-15180	ENSG00000113161	HMGCR	3-hydroxy-3-methylglutaryl-CoA reductase
chr11	64322628	64323311	684	*	Peak_5878	137	.	Distal Intergenic	11	64318182	64321742	3561	1	25824	ENST00000347941.4	4446	ENSG00000126432	PRDX5	peroxiredoxin 5
chr11	57348072	57348359	288	*	Peak_5890	137	.	Promoter (<=1kb)	11	57347424	57350701	3278	1	5024	ENST00000534820.1	648	ENSG00000109991	P2RX3	purinergic receptor P2X 3
chr4	1572494	1573122	629	*	Peak_6096	134	.	Distal Intergenic	4	1641562	1644953	3392	2	152877	ENST00000467215.1	71831	ENSG00000174137	FAM53A	family with sequence similarity 53 member A
chr20	53480248	53480612	365	*	Peak_6304	131	.	Intron (ENST00000371497.9/128553, intron 2 of 2)	20	53552770	53575863	23094	1	101927770	ENST00000424252.2	-72158	NA	LOC101927770	uncharacterized LOC101927770
chr2	27092017	27092496	480	*	Peak_6330	131	.	Promoter (1-2kb)	2	27094198	27097568	3371	1	3795	ENST00000469936.5	-1702	ENSG00000138030	KHK	ketohexokinase
chr6	114999320	115000088	769	*	Peak_6397	130	.	Distal Intergenic	6	115633542	115634191	650	2	105377962	ENST00000446525.1	634103	NA	LINC02534	long intergenic non-protein coding RNA 2534
chr21	35491355	35491782	428	*	Peak_6530	129	.	Intron (ENST00000475045.6/101928269, intron 8 of 12)	21	35435661	35465329	29669	2	100506403	ENST00000494829.1	-26026	ENSG00000159216	LOC100506403	uncharacterized LOC100506403
chr11	79023710	79024242	533	*	Peak_6715	127	.	Intron (ENST00000278550.11/26011, intron 6 of 33)	11	79067903	79076393	8491	2	26011	ENST00000533038.1	52151	ENSG00000149256	TENM4	teneurin transmembrane protein 4
chr18	12958311	12958541	231	*	Peak_6748	127	.	Intron (ENST00000262124.15/81929, intron 3 of 8)	18	12948505	12971249	22745	1	81929	ENST00000588251.1	9806	ENSG00000085415	SEH1L	SEH1 like nucleoporin
chr2	85601230	85601726	497	*	Peak_6752	127	.	Promoter (<=1kb)	2	85599085	85601482	2398	2	129303	ENST00000422458.6	0	ENSG00000168890	TMEM150A	transmembrane protein 150A
chr2	68687120	68687453	334	*	Peak_6805	126	.	Intron (ENST00000463483.5/9938, intron 1 of 7)	2	68679962	68782286	102325	1	9938	ENST00000491237.5	7158	ENSG00000163219	ARHGAP25	Rho GTPase activating protein 25
chr19	10643815	10644525	711	*	Peak_6889	126	.	Promoter (1-2kb)	19	10642336	10643398	1063	1	57153	ENST00000590475.1	1479	ENSG00000129353	SLC44A2	solute carrier family 44 member 2
chr9	98970565	98971310	746	*	Peak_6931	126	.	Intron (ENST00000471477.1/1306, intron 2 of 2)	9	98943713	99070792	127080	1	1306	ENST00000610452.1	26852	ENSG00000204291	COL15A1	collagen type XV alpha 1 chain
chr6	12339859	12340336	478	*	Peak_6935	126	.	Distal Intergenic	6	12290363	12297194	6832	1	1906	ENST00000379375.5	49496	ENSG00000078401	EDN1	endothelin 1
chr8	127222425	127222889	465	*	Peak_6959	125	.	Promoter (<=1kb)	8	127168359	127223666	55308	2	100507056	ENST00000641321.1	777	NA	CCAT1	colon cancer associated transcript 1
chr5	179889895	179890357	463	*	Peak_6964	125	.	Promoter (1-2kb)	5	179887671	179888314	644	2	23061	ENST00000518120.1	-1581	ENSG00000197226	TBC1D9B	TBC1 domain family member 9B
chr16	73504259	73505006	748	*	Peak_6998	125	.	Exon (ENST00000641790.1/100506172, exon 4 of 4)	16	73387063	73389241	2179	1	100506172	ENST00000561875.1	117196	ENSG00000258779	LINC01568	long intergenic non-protein coding RNA 1568
chr20	25859724	25860323	600	*	Peak_7024	124	.	Promoter (<=1kb)	20	25775255	25859903	84649	2	728882	ENST00000584356.1	0	NA	FAM182B	family with sequence similarity 182 member B
chr7	153938423	153938743	321	*	Peak_7054	124	.	Intron (ENST00000404039.5/1804, intron 1 of 25)	7	153887097	154894285	1007189	1	1804	ENST00000404039.5	51326	ENSG00000130226	DPP6	dipeptidyl peptidase like 6
chr11	64579282	64579925	644	*	Peak_7060	123	.	Distal Intergenic	11	64590641	64602348	11708	1	116085	ENST00000377567.6	-10716	ENSG00000197891	SLC22A12	solute carrier family 22 member 12
chr1	48692233	48692684	452	*	Peak_7081	123	.	Intron (ENST00000371839.5/84871, intron 6 of 13)	1	48534173	48663244	129072	2	84871	ENST00000334103.11	-28989	ENSG00000186094	AGBL4	ATP/GTP binding protein like 4
chr11	46406447	46406822	376	*	Peak_7207	121	.	Intron (ENST00000314845.7/55626, intron 18 of 18)	11	46397384	46417995	20612	2	55626	ENST00000526545.5	11173	ENSG00000110497	AMBRA1	autophagy and beclin 1 regulator 1
chr10	69361156	69361470	315	*	Peak_7217	120	.	Intron (ENST00000436817.6/3098, intron 6 of 20)	10	69338020	69386791	48772	1	3098	ENST00000494253.1	23136	ENSG00000156515	HK1	hexokinase 1
chr6	27965469	27965931	463	*	Peak_7433	119	.	Exon (ENST00000398220.2/ENST00000398220.2, exon 1 of 1)	6	27957241	27958182	942	1	26212	ENST00000244623.1	8228	ENSG00000124657	OR2B6	olfactory receptor family 2 subfamily B member 6
chr18	50299432	50299791	360	*	Peak_7475	119	.	Distal Intergenic	18	50282343	50288304	5962	2	30827	ENST00000285106.10	-11128	ENSG00000154832	CXXC1	CXXC finger protein 1
chr16	23013714	23014059	346	*	Peak_7624	117	.	Distal Intergenic	16	23067979	23072548	4570	2	57478	ENST00000567975.1	58489	ENSG00000103404	USP31	ubiquitin specific peptidase 31
chr19	9000575	9001472	898	*	Peak_7634	117	.	Distal Intergenic	19	8848844	8981342	132499	2	94025	ENST00000397910.8	-19233	ENSG00000181143	MUC16	mucin 16, cell surface associated
chr16	57643151	57643791	641	*	Peak_7716	117	.	Promoter (<=1kb)	16	57643007	57651418	8412	1	9289	ENST00000568618.5	144	ENSG00000205336	ADGRG1	adhesion G protein-coupled receptor G1
chr17	50367926	50368423	498	*	Peak_7898	114	.	Promoter (2-3kb)	17	50367865	50370573	2709	2	51264	ENST00000508200.5	2150	ENSG00000108826	MRPL27	mitochondrial ribosomal protein L27
chr19	42369255	42369883	629	*	Peak_7905	114	.	Promoter (<=1kb)	19	42369631	42377802	8172	1	1954	ENST00000593647.1	0	ENSG00000105429	MEGF8	multiple EGF like domains 8
chr5	116075690	116076052	363	*	Peak_8090	112	.	Distal Intergenic	5	116084991	116293287	208297	1	51397	ENST00000274458.8	-8939	ENSG00000145781	COMMD10	COMM domain containing 10
chr8	41682685	41683152	468	*	Peak_8491	110	.	Intron (ENST00000347528.8/286, intron 37 of 41)	8	41668341	41690285	21945	2	286	ENST00000518061.1	7133	ENSG00000029534	ANK1	ankyrin 1
chr12	103662759	103663168	410	*	Peak_8224	110	.	Exon (ENST00000388887.6/55576, exon 18 of 69)	12	103703235	103705695	2461	1	55576	ENST00000549474.1	-40067	ENSG00000136011	STAB2	stabilin 2
chr10	107021908	107022381	474	*	Peak_8186	110	.	Intron (ENST00000263054.10/114815, intron 1 of 25)	10	106577611	106956583	378973	2	114815	ENST00000344440.7	-65325	ENSG00000108018	SORCS1	sortilin related VPS10 domain containing receptor 1
chr10	3801122	3801472	351	*	Peak_8196	110	.	Distal Intergenic	10	3775997	3785281	9285	2	1316	ENST00000542957.1	-15841	ENSG00000067082	KLF6	Kruppel like factor 6
chr18	35468888	35469224	337	*	Peak_8548	110	.	Intron (ENST00000589258.1/125476, intron 1 of 2)	18	35468711	35487470	18760	2	125476	ENST00000591139.1	18246	ENSG00000153391	INO80C	INO80 complex subunit C
chr18	50126052	50126451	400	*	Peak_8572	110	.	Promoter (<=1kb)	18	50126499	50126563	65	2	100422865	ENST00000636981.1	112	ENSG00000283343	MIR4320	microRNA 4320
chr17	45583868	45584738	871	*	Peak_8734	109	.	Distal Intergenic	17	45600869	45602340	1472	2	644172	ENST00000580257.1	17602	NA	MAPK8IP1P2	mitogen-activated protein kinase 8 interacting protein 1 pseudogene 2
chr3	20796103	20796499	397	*	Peak_8757	109	.	Intron (ENST00000634618.1/101927829, intron 11 of 16)	3	20342468	20350928	8461	1	101927829	ENST00000455626.1	453635	ENSG00000231304	LOC101927829	uncharacterized LOC101927829
chr16	30093363	30093739	377	*	Peak_8938	107	.	Promoter (1-2kb)	16	30092314	30094880	2567	2	83719	ENST00000570099.5	1141	ENSG00000090238	YPEL3	yippee like 3
chr11	11927095	11927560	466	*	Peak_9094	105	.	Intron (ENST00000339865.9/55031, intron 10 of 26)	11	11938330	11943149	4820	1	55031	ENST00000525078.1	-10770	ENSG00000170242	USP47	ubiquitin specific peptidase 47
chr15	66243193	66243851	659	*	Peak_9121	105	.	Intron (ENST00000409699.6/84465, intron 1 of 22)	15	65895296	66253737	358442	2	84465	ENST00000288745.7	9886	ENSG00000157890	MEGF11	multiple EGF like domains 11
chr5	17967939	17968579	641	*	Peak_9149	105	.	Distal Intergenic	5	17919228	17955837	36610	1	646241	ENST00000510648.1	48711	NA	LINC02223	long intergenic non-protein coding RNA 2223
chr11	97137525	97138076	552	*	Peak_9265	103	.	Distal Intergenic	11	96508425	96514748	6324	1	105369443	ENST00000543403.1	629100	ENSG00000256684	LOC105369443	uncharacterized LOC105369443
chr17	48971495	48972066	572	*	Peak_9277	103	.	Promoter (2-3kb)	17	48958554	48968596	10043	2	2695	ENST00000357424.2	-2899	ENSG00000159224	GIP	gastric inhibitory polypeptide
chr16	35904462	35905021	560	*	Peak_9401	102	.	Exon (ENST00000624242.1/ENST00000624242.1, exon 1 of 1)	16	35748357	35755796	7440	1	400533	ENST00000565625.1	156105	ENSG00000261122	LINC02167	long intergenic non-protein coding RNA 2167
chr20	57108138	57108572	435	*	Peak_9412	102	.	Distal Intergenic	20	57170917	57173589	2673	2	655	ENST00000476877.1	65017	ENSG00000101144	BMP7	bone morphogenetic protein 7
chr7	17011679	17012374	696	*	Peak_9531	102	.	Intron (ENST00000645559.1/ENST00000645559.1, intron 1 of 1)	7	17132190	17346150	213961	1	196	ENST00000642825.1	-119816	ENSG00000106546	AHR	aryl hydrocarbon receptor
chr22	39617949	39618696	748	*	Peak_9758	102	.	Intron (ENST00000407673.5/8911, intron 3 of 34)	22	39642797	39643512	716	1	8911	ENST00000471970.1	-24101	ENSG00000100346	CACNA1I	calcium voltage-gated channel subunit alpha1 I
chr11	110962574	110963296	723	*	Peak_9558	102	.	Distal Intergenic	11	111091932	111097357	5426	2	105369490	ENST00000603154.1	134061	ENSG00000271584	LINC02550	long intergenic non-protein coding RNA 2550
chr16	22310999	22311312	314	*	Peak_9663	102	.	Promoter (2-3kb)	16	22308962	22318845	9884	1	55718	ENST00000565551.5	2037	ENSG00000058600	POLR3E	RNA polymerase III subunit E
chr15	28241426	28241891	466	*	Peak_9647	102	.	Intron (ENST00000261609.11/8924, intron 23 of 92)	15	28222148	28229516	7369	2	8924	ENST00000569335.1	-11910	ENSG00000128731	HERC2	HECT and RLD domain containing E3 ubiquitin protein ligase 2
chr2	16618012	16618339	328	*	Peak_9721	102	.	Intron (ENST00000381323.7/81553, intron 2 of 11)	2	16552936	16665828	112893	2	81553	ENST00000406434.5	47489	ENSG00000197872	FAM49A	family with sequence similarity 49 member A
chr19	18109803	18110262	460	*	Peak_9940	102	.	Promoter (<=1kb)	19	18110170	18129359	19190	1	23031	ENST00000608648.1	0	ENSG00000099308	MAST3	microtubule associated serine/threonine kinase 3
chr19	42437599	42437935	337	*	Peak_9970	101	.	Intron (ENST00000597203.1/100996307, intron 1 of 1)	19	42428533	42442852	14320	2	284340	ENST00000341918.4	4917	ENSG00000189377	CXCL17	C-X-C motif chemokine ligand 17
chr8	132937783	132938052	270	*	Peak_10139	100	.	Intron (ENST00000220616.8/7038, intron 25 of 47)	8	132919440	133134827	215388	1	7038	ENST00000519178.5	18343	ENSG00000042832	TG	thyroglobulin
chr15	88036504	88036839	336	*	Peak_10164	100	.	Intron (ENST00000394480.6/4916, intron 13 of 18)	15	88072601	88126361	53761	2	4916	ENST00000557897.1	89522	ENSG00000140538	NTRK3	neurotrophic receptor tyrosine kinase 3
chr12	51257098	51257642	545	*	Peak_10203	99	.	Intron (ENST00000604900.5/9802, intron 3 of 3)	12	51245351	51269320	23970	2	57228	ENST00000380103.4	11678	ENSG00000170545	SMAGP	small cell adhesion glycoprotein
chr5	72107003	72107224	222	*	Peak_10319	98	.	Promoter (<=1kb)	5	72107234	72183823	76590	1	4131	ENST00000512974.5	-10	ENSG00000131711	MAP1B	microtubule associated protein 1B
chr10	117563510	117564112	603	*	Peak_10341	97	.	Intron (ENST00000450247.1/ENST00000450247.1, intron 2 of 2)	10	117484295	117545068	60774	2	196047	ENST00000551288.5	-18442	ENSG00000229847	EMX2OS	EMX2 opposite strand/antisense RNA
chr22	20123469	20123914	446	*	Peak_10410	97	.	Promoter (<=1kb)	22	20124139	20127181	3043	1	5902	ENST00000486575.1	-225	ENSG00000099901	RANBP1	RAN binding protein 1
chr9	35621245	35621940	696	*	Peak_10441	97	.	Promoter (1-2kb)	9	35609533	35619542	10010	2	971	ENST00000396757.5	-1703	ENSG00000137101	CD72	CD72 molecule
chr17	77367092	77367640	549	*	Peak_10473	96	.	Intron (ENST00000589070.1/10801, intron 1 of 1)	17	77373190	77500594	127405	1	10801	ENST00000423034.6	-5550	ENSG00000184640	SEPTIN9	septin 9
chr7	51009889	51010321	433	*	Peak_10501	96	.	Intron (ENST00000420449.1/ENST00000420449.1, intron 1 of 3)	7	51017280	51035955	18676	2	23242	ENST00000462395.1	25634	ENSG00000106078	COBL	cordon-bleu WH2 repeat protein
chr3	46546114	46546386	273	*	Peak_10530	96	.	Intron (ENST00000395905.7/79442, intron 2 of 8)	3	46557404	46559694	2291	1	83598	ENST00000614743.1	-11018	ENSG00000268324	LRRC2-AS1	LRRC2 antisense RNA 1
chr14	62077598	62077935	338	*	Peak_10561	95	.	Promoter (1-2kb)	14	62079347	62101709	22363	1	83851	ENST00000430451.3	-1412	ENSG00000139973	SYT16	synaptotagmin 16
chr17	74506031	74506368	338	*	Peak_10660	94	.	Distal Intergenic	17	74521174	74531466	10293	2	124599	ENST00000392621.5	25098	ENSG00000178789	CD300LB	CD300 molecule like family member b
chr16	67207327	67207774	448	*	Peak_10671	94	.	3' UTR	16	67202321	67202395	75	2	442901	ENST00000385213.3	-4932	ENSG00000207948	MIR328	microRNA 328
chr3	56447072	56447380	309	*	Peak_10769	94	.	Intron (ENST00000288221.10/26059, intron 1 of 17)	3	56433789	56434747	959	2	26059	ENST00000477381.1	-12325	ENSG00000187672	ERC2	ELKS/RAB6-interacting/CAST family member 2
chr20	25603228	25603551	324	*	Peak_10745	94	.	Distal Intergenic	20	25452826	25585517	132692	2	22981	ENST00000422516.5	-17711	ENSG00000101004	NINL	ninein like
chr5	1036866	1037452	587	*	Peak_10862	94	.	Promoter (1-2kb)	5	1035805	1038284	2480	1	85409	ENST00000513296.2	1061	ENSG00000145506	NKD2	NKD inhibitor of WNT signaling pathway 2
chr2	96011995	96012289	295	*	Peak_11208	93	.	Promoter (1-2kb)	2	96010614	96023380	12767	1	729234	ENST00000443258.7	1381	ENSG00000231584	FAHD2CP	fumarylacetoacetate hydrolase domain containing 2C, pseudogene
chr11	111732956	111733243	288	*	Peak_10974	93	.	Promoter (2-3kb)	11	111726970	111735323	8354	2	5519	ENST00000530787.1	2080	ENSG00000137713	PPP2R1B	protein phosphatase 2 scaffold subunit Abeta
chr10	78328309	78328629	321	*	Peak_11470	92	.	Intron (ENST00000634930.1/ENST00000634930.1, intron 1 of 3)	10	78267442	78330595	63154	1	414243	ENST00000459633.1	60867	ENSG00000230417	LINC00595	long intergenic non-protein coding RNA 595
chr11	44661770	44662086	317	*	Peak_11475	92	.	Distal Intergenic	11	44618270	44619709	1440	1	3732	ENST00000524750.1	43500	ENSG00000085117	CD82	CD82 molecule
chr16	1559970	1560282	313	*	Peak_11724	91	.	Intron (ENST00000426508.6/9742, intron 18 of 30)	16	1557555	1564110	6556	2	9742	ENST00000561954.1	3828	ENSG00000187535	IFT140	intraflagellar transport 140
chr18	7673475	7673773	299	*	Peak_11726	91	.	Intron (ENST00000580170.5/5797, intron 1 of 32)	18	7754973	8406856	651884	1	5797	ENST00000400053.8	-81200	ENSG00000173482	PTPRM	protein tyrosine phosphatase receptor type M
chr2	8421590	8421981	392	*	Peak_11836	90	.	Distal Intergenic	2	8312809	8383621	70813	2	339789	ENST00000444688.1	-37969	ENSG00000236790	LINC00299	long intergenic non-protein coding RNA 299
chr3	136892561	136892988	428	*	Peak_11837	90	.	Intron (ENST00000288986.6/4690, intron 1 of 3)	3	136862298	136946218	83921	1	4690	ENST00000488930.5	30263	ENSG00000158092	NCK1	NCK adaptor protein 1
chr20	31534224	31534688	465	*	Peak_11891	90	.	Intron (ENST00000398174.8/81502, intron 2 of 12)	20	31538183	31568211	30029	1	81502	ENST00000469126.5	-3495	ENSG00000101294	HM13	histocompatibility minor 13
chr21	45443141	45443665	525	*	Peak_11911	90	.	Intron (ENST00000400337.6/80781, intron 2 of 41)	21	45455489	45513720	58232	1	80781	ENST00000355480.9	-11824	ENSG00000182871	COL18A1	collagen type XVIII alpha 1 chain
chr12	53058242	53058582	341	*	Peak_11916	90	.	Promoter (<=1kb)	12	53058546	53059382	837	1	23371	ENST00000546759.1	0	ENSG00000111077	TNS2	tensin 2
chr3	14881334	14881629	296	*	Peak_11928	90	.	Promoter (<=1kb)	3	14882305	14933438	51134	1	152273	ENST00000468662.5	-676	ENSG00000154783	FGD5	FYVE, RhoGEF and PH domain containing 5
chr20	62500581	62500908	328	*	Peak_11960	89	.	Distal Intergenic	20	62463497	62475970	12474	2	140628	ENST00000252997.2	-24611	ENSG00000130700	GATA5	GATA binding protein 5
chr6	30788936	30789480	545	*	Peak_12108	88	.	Intron (ENST00000439406.5/105375013, intron 2 of 3)	6	30781958	30792250	10293	1	105375013	ENST00000422944.1	6978	ENSG00000228022	HCG20	HLA complex group 20
chr17	74841688	74842373	686	*	Peak_12196	87	.	3' UTR	17	74843364	74859872	16509	2	2905	ENST00000584176.1	17499	ENSG00000161509	GRIN2C	glutamate ionotropic receptor NMDA type subunit 2C
chr13	32938798	32939148	351	*	Peak_12205	87	.	Distal Intergenic	13	32877431	32911650	34220	2	100874167	ENST00000421002.1	-27148	NA	LINC00423	long intergenic non-protein coding RNA 423
chr1	201605342	201605668	327	*	Peak_12251	87	.	Distal Intergenic	1	201622927	201823344	200418	1	89796	ENST00000367302.5	-17259	ENSG00000134369	NAV1	neuron navigator 1
chr2	4253000	4253329	330	*	Peak_12302	87	.	Distal Intergenic	2	3957655	3974070	16416	2	100505964	ENST00000454455.5	-278930	ENSG00000237401	LINC01304	long intergenic non-protein coding RNA 1304
chr21	43993798	43994724	927	*	Peak_12321	87	.	Distal Intergenic	21	44012319	44060262	47944	1	7109	ENST00000380221.7	-17595	ENSG00000160218	TRAPPC10	trafficking protein particle complex 10
chr18	47632787	47633280	494	*	Peak_12445	86	.	Distal Intergenic	18	47380496	47380565	70	1	100616264	ENST00000584505.1	252291	ENSG00000266582	MIR4527	microRNA 4527
chr17	82090868	82091217	350	*	Peak_12450	86	.	Exon (ENST00000306749.3/2194, exon 10 of 43)	17	82094104	82095376	1273	2	2194	ENST00000637525.1	4159	ENSG00000169710	FASN	fatty acid synthase
chr1	24996802	24997271	470	*	Peak_12475	86	.	Distal Intergenic	1	25023503	25023586	84	1	100616365	ENST00000580572.1	-26232	ENSG00000264371	MIR4425	microRNA 4425
chr8	30011995	30012439	445	*	Peak_12522	86	.	Distal Intergenic	8	30065874	30067053	1180	2	51669	ENST00000521934.1	54614	ENSG00000133872	SARAF	store-operated calcium entry associated regulatory factor
chr12	34368497	34368973	477	*	Peak_12553	85	.	Distal Intergenic	12	34022473	34027029	4557	1	84920	ENST00000541875.1	346024	ENSG00000139133	ALG10	ALG10 alpha-1,2-glucosyltransferase
chr1	212643693	212644440	748	*	Peak_12603	85	.	Distal Intergenic	1	212624474	212626778	2305	1	149647	ENST00000294829.4	19219	ENSG00000162771	FAM71A	family with sequence similarity 71 member A
chr15	51459293	51459637	345	*	Peak_12688	84	.	Promoter (<=1kb)	15	51457372	51459190	1819	2	23312	ENST00000560211.5	-103	ENSG00000104093	DMXL2	Dmx like 2
chr6	29714541	29714872	332	*	Peak_12765	84	.	Distal Intergenic	6	29722775	29726526	3752	1	3134	ENST00000376861.5	-7903	ENSG00000204642	HLA-F	major histocompatibility complex, class I, F
chr12	125560129	125560377	249	*	Peak_12651	84	.	Intron (ENST00000299308.7/114795, intron 4 of 8)	12	125622452	125662377	39926	1	114795	ENST00000613307.1	-62075	ENSG00000139364	TMEM132B	transmembrane protein 132B
chr12	12874766	12875229	464	*	Peak_12652	84	.	Promoter (<=1kb)	12	12875499	12876107	609	1	387841	ENST00000459725.1	-270	ENSG00000234498	RPL13AP20	ribosomal protein L13a pseudogene 20
chr12	12933986	12934483	498	*	Peak_12653	84	.	Intron (ENST00000545914.5/100506314, intron 1 of 3)	12	12927764	12980094	52331	1	100506314	ENST00000536029.1	6222	ENSG00000247498	GPRC5D-AS1	GPRC5D and HEBP1 antisense RNA 1
chr9	89790868	89791168	301	*	Peak_12821	84	.	Distal Intergenic	9	89701651	89719670	18020	1	100129066	ENST00000444374.1	89217	ENSG00000237372	UNQ6494	uncharacterized LOC100129066
chr8	135714184	135714580	397	*	Peak_12859	84	.	Distal Intergenic	8	135607010	135656722	49713	1	10656	ENST00000521461.5	107174	ENSG00000131773	KHDRBS3	KH RNA binding domain containing, signal transduction associated 3
chr9	36602796	36603019	224	*	Peak_13072	84	.	Intron (ENST00000298048.6/9833, intron 7 of 17)	9	36630007	36633200	3194	1	9833	ENST00000480021.1	-26988	ENSG00000165304	MELK	maternal embryonic leucine zipper kinase
chr9	109656097	109656335	239	*	Peak_13076	84	.	Intron (ENST00000374531.6/114299, intron 1 of 6)	9	109640788	109946703	305916	1	114299	ENST00000374531.6	15309	ENSG00000243444	PALM2	paralemmin 2
chr20	3732793	3733534	742	*	Peak_13109	84	.	Promoter (<=1kb)	20	3732711	3753111	20401	1	116835	ENST00000399701.1	82	ENSG00000132622	HSPA12B	heat shock protein family A (Hsp70) member 12B
chr12	2524427	2524823	397	*	Peak_13321	83	.	Intron (ENST00000335762.9/775, intron 9 of 47)	12	2504436	2566582	62147	1	775	ENST00000491104.1	19991	ENSG00000151067	CACNA1C	calcium voltage-gated channel subunit alpha1 C
chr2	109306211	109306752	542	*	Peak_13343	83	.	Intron (ENST00000309415.7/344558, intron 1 of 9)	2	109313571	109313625	55	2	100423027	ENST00000583300.1	6873	ENSG00000265965	MIR4266	microRNA 4266
chr17	3690606	3690869	264	*	Peak_13334	83	.	Promoter (<=1kb)	17	3685520	3690649	5130	2	5026	ENST00000550772.1	0	ENSG00000083454	P2RX5	purinergic receptor P2X 5
chr17	16814743	16815010	268	*	Peak_13414	82	.	Intron (ENST00000602730.1/162632, intron 10 of 10)	17	16798009	16804455	6447	1	162632	ENST00000341745.3	16734	ENSG00000188933	USP32P1	ubiquitin specific peptidase 32 pseudogene 1
chr16	75705453	75706215	763	*	Peak_13622	81	.	Intron (ENST00000564671.2/ENST00000564671.2, intron 1 of 2)	16	75693929	75701459	7531	2	100033411	ENST00000633875.3	-3994	ENSG00000282757	DUXB	double homeobox B
chr3	171685675	171685930	256	*	Peak_13878	79	.	Intron (ENST00000356327.9/5337, intron 15 of 25)	3	171653242	171677853	24612	2	5337	ENST00000471075.1	-7822	ENSG00000075651	PLD1	phospholipase D1
chr8	63138060	63138345	286	*	Peak_13974	79	.	Exon (ENST00000523386.1/ENST00000523386.1, exon 1 of 2)	8	63167725	63168442	718	2	101410533	ENST00000603538.1	30097	ENSG00000270673	YTHDF3-AS1	YTHDF3 antisense RNA 1 (head to head)
chr9	131383488	131383974	487	*	Peak_14031	78	.	Intron (ENST00000646130.1/ENST00000646130.1, intron 1 of 1)	9	131394093	131500197	106105	1	84726	ENST00000405995.5	-10119	ENSG00000130723	PRRC2B	proline rich coiled-coil 2B
chr5	87051494	87052016	523	*	Peak_14082	78	.	Intron (ENST00000503349.1/101929380, intron 1 of 2)	5	87114879	87114954	76	2	100422887	ENST00000582178.1	62938	ENSG00000265919	MIR4280	microRNA 4280
chr13	50574111	50574736	626	*	Peak_14271	77	.	Intron (ENST00000479420.5/10301, intron 4 of 5)	13	50520933	50527449	6517	2	103689915	ENST00000428276.1	-46662	ENSG00000186047	DLEU1-AS1	DLEU1 antisense RNA 1
chr9	124258327	124259000	674	*	Peak_14357	77	.	Promoter (<=1kb)	9	124258261	124347797	89537	1	10783	ENST00000454453.5	66	ENSG00000119408	NEK6	NIMA related kinase 6
chr12	14217621	14217936	316	*	Peak_14261	77	.	Intron (ENST00000538329.1/ENST00000538329.1, intron 1 of 1)	12	14365632	14502935	137304	1	55729	ENST00000261168.8	-147696	ENSG00000171681	ATF7IP	activating transcription factor 7 interacting protein
chr14	104865564	104865841	278	*	Peak_14376	77	.	Promoter (<=1kb)	14	104865313	104896770	31458	1	283638	ENST00000453495.2	251	ENSG00000099814	CEP170B	centrosomal protein 170B
chr7	155713399	155713733	335	*	Peak_14420	77	.	Intron (ENST00000401878.7/155435, intron 8 of 17)	7	155706814	155718435	11622	1	155435	ENST00000486747.1	6585	ENSG00000184863	RBM33	RNA binding motif protein 33
chr19	28013723	28014201	479	*	Peak_14681	76	.	Distal Intergenic	19	27936761	27984743	47983	1	101927151	ENST00000590507.1	76962	ENSG00000267575	LOC101927151	uncharacterized LOC101927151
chr4	138867074	138867790	717	*	Peak_14826	76	.	Intron (ENST00000511951.1/105377448, intron 2 of 2)	4	138819954	138821465	1512	2	105377448	ENST00000505607.1	-45609	ENSG00000250195	LOC105377448	uncharacterized LOC105377448
chr16	49842447	49842724	278	*	Peak_14635	76	.	Intron (ENST00000563137.6/23090, intron 1 of 7)	16	49490604	49856135	365532	2	23090	ENST00000563137.6	13411	ENSG00000102935	ZNF423	zinc finger protein 423
chr15	78319341	78319660	320	*	Peak_14607	76	.	Distal Intergenic	15	78283235	78299794	16560	2	80349	ENST00000267973.6	-19547	ENSG00000140395	WDR61	WD repeat domain 61
chr17	23016263	23016481	219	*	Peak_14654	76	.	Distal Intergenic	17	22523111	22524663	1553	1	100462977	ENST00000540040.2	493152	ENSG00000256618	MTRNR2L1	MT-RNR2 like 1
chr3	70748278	70748571	294	*	Peak_14810	76	.	Distal Intergenic	3	70959191	70966352	7162	2	27086	ENST00000460805.5	217781	ENSG00000114861	FOXP1	forkhead box P1
chr5	177982250	177982733	484	*	Peak_14880	76	.	Exon (ENST00000511650.1/100128340, exon 2 of 2)	5	177992235	177996242	4008	2	5626	ENST00000308304.2	13509	ENSG00000175325	PROP1	PROP paired-like homeobox 1
chr19	27684618	27684884	267	*	Peak_14680	76	.	Intron (ENST00000588027.5/148189, intron 2 of 2)	19	27778640	27793031	14392	2	148189	ENST00000591338.1	108147	ENSG00000261824	LINC00662	long intergenic non-protein coding RNA 662
chr2	106137297	106137600	304	*	Peak_14692	76	.	Promoter (1-2kb)	2	106123052	106138786	15735	2	80146	ENST00000436241.1	1186	ENSG00000115652	UXS1	UDP-glucuronate decarboxylase 1
chr6	98620886	98621149	264	*	Peak_15182	76	.	Distal Intergenic	6	98834592	98839470	4879	1	5454	ENST00000328345.7	-213443	ENSG00000184486	POU3F2	POU class 3 homeobox 2
chr9	136943837	136944285	449	*	Peak_15249	76	.	Promoter (<=1kb)	9	136941411	136944155	2745	2	54461	ENST00000480818.3	0	ENSG00000159069	FBXW5	F-box and WD repeat domain containing 5
chr1	123144832	123145065	234	*	Peak_15269	76	.	Distal Intergenic	1	121519345	121568791	49447	1	647121	ENST00000458200.2	1625487	ENSG00000231752	EMBP1	embigin pseudogene 1
chr17	80981520	80981857	338	*	Peak_15293	76	.	Distal Intergenic	17	80991598	80999145	7548	1	79643	ENST00000572525.5	-9741	ENSG00000176108	CHMP6	charged multivesicular body protein 6
chr3	8636275	8636678	404	*	Peak_15379	75	.	Promoter (2-3kb)	3	8627655	8633715	6061	2	51066	ENST00000492435.1	-2560	ENSG00000125046	SSUH2	ssu-2 homolog
chr19	38743968	38744475	508	*	Peak_15399	75	.	Promoter (<=1kb)	19	38730559	38744474	13916	2	147968	ENST00000328867.8	0	ENSG00000182472	CAPN12	calpain 12
chr5	15816920	15817166	247	*	Peak_15440	75	.	Intron (ENST00000504595.1/23194, intron 2 of 3)	5	15927888	15939795	11908	1	23194	ENST00000329673.8	-110722	ENSG00000183580	FBXL7	F-box and leucine rich repeat protein 7
chr11	36012600	36012939	340	*	Peak_15561	74	.	Promoter (2-3kb)	11	36010098	36010204	107	1	100616311	ENST00000579824.1	2502	ENSG00000263389	MIR3973	microRNA 3973
chr14	105588376	105588616	241	*	Peak_15567	74	.	Exon (ENST00000497872.4/ENST00000497872.4, exon 1 of 5)	14	105621116	105621180	65	1	102465871	ENST00000616769.1	-32500	ENSG00000274172	MIR8071-1	microRNA 8071-1
chr5	174163405	174163770	366	*	Peak_15653	74	.	Intron (ENST00000521585.5/51617, intron 3 of 4)	5	174091205	174108346	17142	1	51617	ENST00000521146.1	72200	ENSG00000170091	NSG2	neuronal vesicle trafficking associated 2
chr5	41896874	41897192	319	*	Peak_15654	74	.	Distal Intergenic	5	41904188	41911179	6992	1	285636	ENST00000505931.6	-6996	ENSG00000205765	C5orf51	chromosome 5 open reading frame 51
chr9	135974673	135975153	481	*	Peak_15701	74	.	Distal Intergenic	9	135932969	135961380	28412	2	10422	ENST00000371756.3	-13293	ENSG00000130560	UBAC1	UBA domain containing 1
chr1	12285639	12285960	322	*	Peak_15792	73	.	Promoter (2-3kb)	1	12283435	12373788	90354	1	55187	ENST00000646917.1	2204	ENSG00000048707	VPS13D	vacuolar protein sorting 13 homolog D
chr2	27663292	27663533	242	*	Peak_15823	73	.	Promoter (<=1kb)	2	27663471	27694969	31499	1	22950	ENST00000326019.10	0	ENSG00000163798	SLC4A1AP	solute carrier family 4 member 1 adaptor protein
chr8	119489587	119490070	484	*	Peak_16031	72	.	Distal Intergenic	8	119416450	119417120	671	1	4856	ENST00000520082.1	73137	ENSG00000136999	CCN3	cellular communication network factor 3
chr17	27401569	27401916	348	*	Peak_15920	72	.	Distal Intergenic	17	27417690	27430190	12501	1	440419	ENST00000581469.5	-15774	ENSG00000266433	TBC1D3P5	TBC1 domain family member 3 pseudogene 5
chr16	56989382	56989655	274	*	Peak_15915	72	.	Promoter (<=1kb)	16	56989485	57048354	58870	1	84166	ENST00000539881.5	0	ENSG00000140853	NLRC5	NLR family CARD domain containing 5
chr7	28769821	28770148	328	*	Peak_16027	72	.	Intron (ENST00000396299.6/9586, intron 6 of 9)	7	28809409	28819559	10151	1	9586	ENST00000498316.3	-39261	ENSG00000146592	CREB5	cAMP responsive element binding protein 5
chr8	133522847	133523142	296	*	Peak_16035	72	.	Intron (ENST00000399640.3/6482, intron 3 of 9)	8	133476143	133499421	23279	2	6482	ENST00000520020.5	-23426	ENSG00000008513	ST3GAL1	ST3 beta-galactoside alpha-2,3-sialyltransferase 1
chr21	9816744	9817071	328	*	Peak_15955	72	.	Promoter (2-3kb)	21	9806094	9814009	7916	2	441058	ENST00000623919.1	-2735	NA	LINC01667	long intergenic non-protein coding RNA 1667
chr7	135697094	135697323	230	*	Peak_16025	72	.	Intron (ENST00000354042.8/26266, intron 8 of 15)	7	135699364	135705807	6444	2	26266	ENST00000480376.1	8484	ENSG00000164707	SLC13A4	solute carrier family 13 member 4
chr16	75058827	75059226	400	*	Peak_16067	72	.	Intron (ENST00000335325.8/84937, intron 1 of 4)	16	75095144	75105336	10193	1	84937	ENST00000579084.1	-35918	ENSG00000186187	ZNRF1	zinc and ring finger 1
chr16	50034702	50035175	474	*	Peak_16239	71	.	Intron (ENST00000458059.7/255919, intron 6 of 6)	16	50026160	50034156	7997	1	255919	ENST00000566093.1	8542	ENSG00000205423	CNEP1R1	CTD nuclear envelope phosphatase 1 regulatory subunit 1
chr3	25028574	25028861	288	*	Peak_16246	71	.	Intron (ENST00000455576.1/5915, intron 4 of 5)	3	25174332	25596455	422124	1	5915	ENST00000383772.8	-145471	ENSG00000077092	RARB	retinoic acid receptor beta
chr5	15060761	15061480	720	*	Peak_16248	71	.	Distal Intergenic	5	14704800	14871785	166986	2	56172	ENST00000284268.7	-188976	ENSG00000154122	ANKH	ANKH inorganic pyrophosphate transport regulator
chr6	105382137	105382363	227	*	Peak_16293	70	.	Intron (ENST00000369110.7/5550, intron 2 of 14)	6	105277565	105403084	125520	2	5550	ENST00000369110.7	20721	ENSG00000085377	PREP	prolyl endopeptidase
chr19	1729400	1729825	426	*	Peak_16380	70	.	Distal Intergenic	19	1752373	1780988	28616	1	390874	ENST00000382349.4	-22548	ENSG00000205922	ONECUT3	one cut homeobox 3
chr17	62966400	62966781	382	*	Peak_16484	70	.	Exon (ENST00000650312.1/ENST00000650312.1, exon 1 of 6)	17	62944215	62944312	98	1	693218	ENST00000384821.1	22185	ENSG00000207552	MIR633	microRNA 633
chr9	1775208	1775481	274	*	Peak_16506	70	.	Distal Intergenic	9	1980290	2029051	48762	1	6595	ENST00000637383.1	-204809	ENSG00000080503	SMARCA2	SWI/SNF related, matrix associated, actin dependent regulator of chromatin, subfamily a, member 2
chr8	117663373	117663791	419	*	Peak_16599	69	.	Distal Intergenic	8	117530364	117540002	9639	1	90390	ENST00000519391.1	133009	ENSG00000164758	MED30	mediator complex subunit 30
chr14	71989048	71989752	705	*	Peak_16546	69	.	Intron (ENST00000553525.5/9628, intron 2 of 17)	14	71964792	72540333	575542	1	9628	ENST00000407322.8	24256	ENSG00000182732	RGS6	regulator of G protein signaling 6
chr2	20011718	20012040	323	*	Peak_16567	69	.	Promoter (<=1kb)	2	19993037	20012665	19629	2	4148	ENST00000421259.2	625	ENSG00000132031	MATN3	matrilin 3
chr20	63032383	63032724	342	*	Peak_16806	69	.	Intron (ENST00000606208.5/63930, intron 1 of 1)	20	63034383	63036353	1971	2	100144596	ENST00000456634.1	3629	NA	LINC00029	long intergenic non-protein coding RNA 29
chr12	105253941	105254231	291	*	Peak_16734	69	.	Intron (ENST00000548458.6/387882, intron 1 of 6)	12	105173296	105236238	62943	2	55198	ENST00000258530.7	-17703	ENSG00000136044	APPL2	adaptor protein, phosphotyrosine interacting with PH domain and leucine zipper 2
chr4	27028122	27028426	305	*	Peak_16859	69	.	Distal Intergenic	4	27021282	27022661	1380	1	57620	ENST00000504511.1	6840	ENSG00000109689	STIM2	stromal interaction molecule 2
chr19	44418634	44418937	304	*	Peak_16798	69	.	Intron (ENST00000588655.1/7772, intron 4 of 5)	19	44329695	44401608	71914	2	7771	ENST00000588212.1	-17026	ENSG00000062370	ZNF112	zinc finger protein 112
chr4	4486902	4487248	347	*	Peak_17508	68	.	Intron (ENST00000505286.5/53407, intron 1 of 10)	4	4476121	4481700	5580	2	104472519	ENST00000515487.1	-5202	ENSG00000248221	STX18-IT1	STX18 intronic transcript 1
chrX	69569961	69570186	226	*	Peak_17748	68	.	Exon (ENST00000454131.1/ENST00000454131.1, exon 2 of 2)	23	69616067	69861061	244995	1	1896	ENST00000525810.5	-45881	ENSG00000158813	EDA	ectodysplasin A
chr9	107074150	107074536	387	*	Peak_17670	68	.	Intron (ENST00000439901.1/340512, intron 3 of 4)	9	107102044	107102872	829	2	340512	ENST00000418656.1	28336	ENSG00000230782	LOC340512	uncharacterized LOC340512
chrX	122244528	122244746	219	*	Peak_17710	68	.	Distal Intergenic	23	121370972	121371053	82	1	100500869	ENST00000584290.1	873556	ENSG00000265456	MIR3672	microRNA 3672
chr12	107355073	107355452	380	*	Peak_17050	68	.	Intron (ENST00000280758.9/121551, intron 1 of 16)	12	107320588	107610356	289769	1	121551	ENST00000415943.6	34485	ENSG00000151136	BTBD11	BTB domain containing 11
chr14	103373375	103373642	268	*	Peak_17140	68	.	Distal Intergenic	14	103385392	103503252	117861	1	4140	ENST00000440884.7	-11750	ENSG00000075413	MARK3	microtubule affinity regulating kinase 3
chr13	112996825	112997171	347	*	Peak_17109	68	.	Intron (ENST00000375608.7/23263, intron 2 of 29)	13	113001270	113064311	63042	1	23263	ENST00000409954.6	-4099	ENSG00000126217	MCF2L	MCF.2 cell line derived transforming sequence like
chr14	61807390	61807678	289	*	Peak_17157	68	.	Distal Intergenic	14	61812721	62075391	262671	1	83851	ENST00000636133.1	-5043	ENSG00000139973	SYT16	synaptotagmin 16
chr1	219414230	219414783	554	*	Peak_17071	68	.	Intron (ENST00000441790.2/ENST00000441790.2, intron 1 of 2)	1	219435152	219442642	7491	2	102723886	ENST00000420762.1	27859	NA	LYPLAL1-AS1	LYPLAL1 antisense RNA 1
chr11	61090872	61091169	298	*	Peak_17814	68	.	Distal Intergenic	11	61102395	61127852	25458	1	921	ENST00000347785.7	-11226	ENSG00000110448	CD5	CD5 molecule
chr19	2018771	2019061	291	*	Peak_17839	68	.	Intron (ENST00000590646.5/55643, intron 2 of 4)	19	1985438	2015724	30287	2	55643	ENST00000255608.8	-3047	ENSG00000133243	BTBD2	BTB domain containing 2
chr15	29129148	29129422	275	*	Peak_17873	68	.	Intron (ENST00000261275.4/23359, intron 7 of 10)	15	29070658	29102759	32102	1	321	ENST00000382938.3	58490	ENSG00000034053	APBA2	amyloid beta precursor protein binding family A member 2
chr9	112060131	112060556	426	*	Peak_17961	67	.	Promoter (1-2kb)	9	112041083	112058471	17389	2	64420	ENST00000475283.2	-1660	ENSG00000106868	SUSD1	sushi domain containing 1
chr2	95260714	95261064	351	*	Peak_18062	67	.	Distal Intergenic	2	95274453	95291303	16851	1	150696	ENST00000317620.13	-13389	ENSG00000155066	PROM2	prominin 2
chr1	10816334	10816780	447	*	Peak_18049	67	.	Distal Intergenic	1	10647213	10796650	149438	2	54897	ENST00000344008.5	-19684	ENSG00000130940	CASZ1	castor zinc finger 1
chr1	44719436	44719795	360	*	Peak_18078	67	.	Promoter (2-3kb)	1	44721786	44721902	117	2	26828	ENST00000362507.1	2107	ENSG00000199377	RNU5F-1	RNA, U5F small nuclear 1
chr3	27533914	27534200	287	*	Peak_18130	67	.	Distal Intergenic	3	27423641	27484420	60780	2	9497	ENST00000428005.1	-49494	ENSG00000033867	SLC4A7	solute carrier family 4 member 7
chr1	36665266	36665532	267	*	Peak_18109	67	.	Distal Intergenic	1	36466043	36483278	17236	2	1441	ENST00000373106.5	-181988	ENSG00000119535	CSF3R	colony stimulating factor 3 receptor
chr17	75270515	75270757	243	*	Peak_18152	67	.	Promoter (<=1kb)	17	75267751	75270619	2869	2	57409	ENST00000579194.5	0	ENSG00000125457	MIF4GD	MIF4G domain containing
chr1	35684543	35684801	259	*	Peak_18168	66	.	Distal Intergenic	1	35716160	35716911	752	2	127703	ENST00000503824.1	32110	ENSG00000142686	C1orf216	chromosome 1 open reading frame 216
chr17	16133061	16133317	257	*	Peak_18213	66	.	Intron (ENST00000268712.7/9611, intron 14 of 45)	17	16101718	16122635	20918	2	9611	ENST00000583226.1	-10426	ENSG00000141027	NCOR1	nuclear receptor corepressor 1
chr2	9809456	9809731	276	*	Peak_18216	66	.	Distal Intergenic	2	9843354	9934416	91063	1	9014	ENST00000263663.9	-33623	ENSG00000115750	TAF1B	TATA-box binding protein associated factor, RNA polymerase I subunit B
chr7	43233482	43233916	435	*	Peak_18227	66	.	Intron (ENST00000395891.6/23072, intron 2 of 29)	7	43249137	43311993	62857	1	23072	ENST00000464944.1	-15221	ENSG00000002746	HECW1	HECT, C2 and WW domain containing E3 ubiquitin protein ligase 1
chr17	1074990	1075221	232	*	Peak_18347	66	.	Intron (ENST00000302538.9/29, intron 6 of 22)	17	1067117	1079122	12006	2	29	ENST00000571945.5	3901	ENSG00000159842	ABR	ABR activator of RhoGEF and GTPase
chr8	53693607	53693832	226	*	Peak_18487	66	.	Distal Intergenic	8	53715673	53739623	23951	2	51606	ENST00000522159.5	45791	ENSG00000047249	ATP6V1H	ATPase H+ transporting V1 subunit H
chr5	122201366	122201721	356	*	Peak_18438	66	.	Distal Intergenic	5	122160191	122180061	19871	1	100505841	ENST00000514637.1	41175	ENSG00000250803	LOC100505841	zinc finger protein 474-like
chr1	227975818	227976183	366	*	Peak_18301	66	.	Exon (ENST00000425003.2/ENST00000425003.2, exon 2 of 3)	1	227918656	227947898	29243	2	7483	ENST00000272164.5	-27920	ENSG00000143816	WNT9A	Wnt family member 9A
chr5	1005517	1005814	298	*	Peak_18433	66	.	Exon (ENST00000606540.1/ENST00000606540.1, exon 1 of 1)	5	1008829	1038943	30115	1	85409	ENST00000296849.9	-3015	ENSG00000145506	NKD2	NKD inhibitor of WNT signaling pathway 2
chr9	129171303	129171523	221	*	Peak_18525	65	.	Distal Intergenic	9	129175552	129178262	2711	2	389792	ENST00000372491.3	6739	ENSG00000188483	IER5L	immediate early response 5 like
chr17	47704384	47704704	321	*	Peak_18537	65	.	Intron (ENST00000361722.7/9755, intron 6 of 8)	17	47695685	47711490	15806	1	9755	ENST00000622396.1	8699	ENSG00000198933	TBKBP1	TBK1 binding protein 1
chr2	202595449	202595790	342	*	Peak_18558	65	.	Distal Intergenic	2	202635188	202769757	134570	1	150864	ENST00000392238.2	-39398	ENSG00000138439	FAM117B	family with sequence similarity 117 member B
chr18	48647950	48648347	398	*	Peak_18578	65	.	Intron (ENST00000256413.7/9811, intron 3 of 11)	18	48670600	48670668	69	1	100616366	ENST00000584576.3	-22253	ENSG00000266276	MIR4743	microRNA 4743
chr7	100960767	100961021	255	*	Peak_18591	65	.	Promoter (2-3kb)	7	100957965	100967890	9926	1	4584	ENST00000414964.5	2802	ENSG00000169894	MUC3A	mucin 3A, cell surface associated
chr6	99149682	99149966	285	*	Peak_18590	65	.	Distal Intergenic	6	99124609	99124696	88	1	100616347	ENST00000579940.1	25073	ENSG00000265226	MIR548AI	microRNA 548ai
chr17	36074006	36074246	241	*	Peak_18583	65	.	Intron (ENST00000620056.4/ENST00000620056.4, intron 1 of 3)	17	36070374	36071481	1108	1	6362	ENST00000616474.1	3632	ENSG00000275385	CCL18	C-C motif chemokine ligand 18
chr3	49489047	49489469	423	*	Peak_18598	65	.	Intron (ENST00000515359.6/1605, intron 1 of 2)	3	49492716	49510741	18026	1	1605	ENST00000475424.1	-3247	ENSG00000173402	DAG1	dystroglycan 1
chr5	153960220	153960515	296	*	Peak_18600	65	.	Distal Intergenic	5	153992714	153995307	2594	2	10827	ENST00000518946.1	34792	ENSG00000055147	FAM114A2	family with sequence similarity 114 member A2
chr1	226607328	226607869	542	*	Peak_18594	65	.	3' UTR	1	226656640	226659670	3031	2	100506443	ENST00000443422.1	51801	NA	ITPKB-IT1	ITPKB intronic transcript 1
chr19	2494330	2494572	243	*	Peak_18676	64	.	Distal Intergenic	19	2476356	2477126	771	1	4616	ENST00000593043.1	17974	ENSG00000099860	GADD45B	growth arrest and DNA damage inducible beta
chr2	45611101	45611385	285	*	Peak_18686	64	.	Promoter (<=1kb)	2	45388680	45611281	222602	2	55133	ENST00000263736.4	0	ENSG00000068784	SRBD1	S1 RNA binding domain 1
chr2	4517323	4517724	402	*	Peak_18941	64	.	Distal Intergenic	2	4630200	4643355	13156	2	727982	ENST00000432314.5	125631	ENSG00000231532	LINC01249	long intergenic non-protein coding RNA 1249
chr6	7408905	7409174	270	*	Peak_19001	64	.	Promoter (1-2kb)	6	7410378	7411567	1190	1	83732	ENST00000493691.1	-1204	ENSG00000124784	RIOK1	RIO kinase 1
chr18	12616399	12616668	270	*	Peak_19025	64	.	Intron (ENST00000409402.8/56907, intron 2 of 16)	18	12449506	12636340	186835	2	56907	ENST00000440472.6	19672	ENSG00000134278	SPIRE1	spire type actin nucleation factor 1
chr5	172575948	172576421	474	*	Peak_19127	64	.	Distal Intergenic	5	172557392	172559014	1623	2	105377728	ENST00000517916.1	-16934	NA	LINC01944	long intergenic non-protein coding RNA 1944
chr8	94070743	94071238	496	*	Peak_19182	63	.	Distal Intergenic	8	94145969	94162128	16160	2	1015	ENST00000520952.1	90890	ENSG00000079112	CDH17	cadherin 17
chr17	79176918	79177226	309	*	Peak_19201	63	.	Intron (ENST00000583458.5/146713, intron 3 of 13)	17	79115698	79183472	67775	2	146713	ENST00000580508.1	6246	ENSG00000167281	RBFOX3	RNA binding fox-1 homolog 3
chr15	67131949	67132179	231	*	Peak_19195	63	.	Intron (ENST00000559460.5/4088, intron 1 of 3)	15	67128103	67187447	59345	1	4088	ENST00000558894.5	3846	ENSG00000166949	SMAD3	SMAD family member 3
chr19	1465189	1465447	259	*	Peak_19257	63	.	Exon (ENST00000590469.5/10297, exon 15 of 15)	19	1452800	1465496	12697	1	10297	ENST00000238483.5	12389	ENSG00000115266	APC2	APC regulator of WNT signaling pathway 2
chr12	52057013	52057253	241	*	Peak_19281	63	.	Promoter (<=1kb)	12	52056689	52057471	783	1	3164	ENST00000565848.1	324	ENSG00000123358	NR4A1	nuclear receptor subfamily 4 group A member 1
chr11	64102346	64102564	219	*	Peak_19312	62	.	Promoter (<=1kb)	11	64103188	64119173	15986	1	23769	ENST00000246841.3	-624	ENSG00000126500	FLRT1	fibronectin leucine rich transmembrane protein 1
chr2	733064	733636	573	*	Peak_19319	62	.	Distal Intergenic	2	667335	677439	10105	2	129787	ENST00000281017.7	-55625	ENSG00000151353	TMEM18	transmembrane protein 18
chr1	225427932	225428258	327	*	Peak_19322	62	.	Promoter (<=1kb)	1	225401502	225428035	26534	2	3930	ENST00000272163.8	0	ENSG00000143815	LBR	lamin B receptor
chr15	101596405	101596952	548	*	Peak_19380	62	.	Distal Intergenic	15	101613676	101614339	664	2	101927505	ENST00000618724.1	17387	NA	LINC02348	long intergenic non-protein coding RNA 2348
chr17	1932725	1933090	366	*	Peak_19393	62	.	Downstream (1-2kb)	17	1891650	1897536	5887	1	6117	ENST00000573994.1	41075	ENSG00000132383	RPA1	replication protein A1
chr2	46913556	46913811	256	*	Peak_19396	62	.	Promoter (<=1kb)	2	46907935	46914074	6140	2	90411	ENST00000417180.1	263	ENSG00000180398	MCFD2	multiple coagulation factor deficiency 2
chr8	51840707	51840978	272	*	Peak_19452	61	.	Intron (ENST00000544451.2/115294, intron 1 of 3)	8	51826929	51845745	18817	2	115294	ENST00000519554.5	4767	ENSG00000168300	PCMTD1	protein-L-isoaspartate (D-aspartate) O-methyltransferase domain containing 1
chr12	98399398	98399680	283	*	Peak_19508	61	.	Distal Intergenic	12	98454877	98457115	2239	2	121456	ENST00000556476.1	57435	ENSG00000227825	SLC9A7P1	solute carrier family 9 member 7 pseudogene 1
chr14	88142458	88142711	254	*	Peak_19537	61	.	Intron (ENST00000556546.1/ENST00000556546.1, intron 1 of 2)	14	88018605	88036319	17715	2	101928791	ENST00000553921.1	-106139	ENSG00000258826	LINC01147	long intergenic non-protein coding RNA 1147
chr2	130821498	130821753	256	*	Peak_19587	61	.	Distal Intergenic	2	130836916	131046189	209274	1	50649	ENST00000409359.6	-15163	ENSG00000136002	ARHGEF4	Rho guanine nucleotide exchange factor 4
chr7	75073268	75073489	222	*	Peak_19695	61	.	Promoter (<=1kb)	7	75055575	75073790	18216	2	81554	ENST00000616051.1	301	ENSG00000274523	RCC1L	RCC1 like
chr12	31347444	31347785	342	*	Peak_19499	61	.	Distal Intergenic	12	31287737	31327058	39322	2	58516	ENST00000539004.5	-20386	ENSG00000139146	SINHCAF	SIN3-HDAC complex associated factor
chr3	70379298	70379521	224	*	Peak_19630	61	.	Intron (ENST00000642114.1/101927152, intron 9 of 9)	3	70196894	70312726	115833	2	107986096	ENST00000567252.1	-66572	ENSG00000242120	MDFIC2	MyoD family inhibitor domain containing 2
chr14	104165770	104166244	475	*	Peak_19724	61	.	Intron (ENST00000423312.6/26153, intron 4 of 14)	14	104139040	104180894	41855	1	26153	ENST00000315264.7	26730	ENSG00000066735	KIF26A	kinesin family member 26A
chr11	63084561	63084887	327	*	Peak_19734	61	.	Intron (ENST00000417740.5/283238, intron 6 of 9)	11	63137867	63369718	231852	1	387775	ENST00000525620.1	-52980	ENSG00000184999	SLC22A10	solute carrier family 22 member 10
chr8	137830954	137831346	393	*	Peak_20689	61	.	Intron (ENST00000518973.1/401478, intron 2 of 2)	8	137809444	138083570	274127	2	401478	ENST00000518973.1	252224	NA	LOC401478	uncharacterized LOC401478
chr12	73235390	73235698	309	*	Peak_19984	61	.	Distal Intergenic	12	73159190	73208317	49128	1	101928137	ENST00000550723.1	76200	ENSG00000258123	LINC02444	long intergenic non-protein coding RNA 2444
chr5	116763728	116763984	257	*	Peak_20504	61	.	Promoter (1-2kb)	5	116742991	116762209	19219	2	102467223	ENST00000504419.1	-1519	NA	LINC02214	long intergenic non-protein coding RNA 2214
chr2	124676692	124676972	281	*	Peak_20241	61	.	Intron (ENST00000431078.1/129684, intron 13 of 23)	2	124221705	124242441	20737	1	129684	ENST00000470921.1	454987	ENSG00000155052	CNTNAP5	contactin associated protein like 5
chr5	125149258	125149538	281	*	Peak_20508	61	.	Exon (ENST00000512965.2/101927421, exon 4 of 4)	5	125036638	125150729	114092	1	101927421	ENST00000512965.2	112620	NA	LOC101927421	uncharacterized LOC101927421
chrX	3146072	3146321	250	*	Peak_20801	61	.	Distal Intergenic	23	3066833	3112706	45874	1	416	ENST00000359361.2	79239	ENSG00000062096	ARSF	arylsulfatase F
chr8	113409259	113409478	220	*	Peak_20684	61	.	Intron (ENST00000297405.9/114788, intron 1 of 70)	8	113309205	113436790	127586	2	114788	ENST00000493303.1	27312	ENSG00000164796	CSMD3	CUB and Sushi multiple domains 3
chr19	58563359	58563704	346	*	Peak_20212	61	.	Exon (ENST00000600004.1/ENST00000600004.1, exon 1 of 1)	19	58559225	58574797	15573	1	100131691	ENST00000600534.1	4134	ENSG00000267858	MZF1-AS1	MZF1 antisense RNA 1
chr14	23449185	23449527	343	*	Peak_20037	61	.	Distal Intergenic	14	23412738	23435718	22981	2	4625	ENST00000355349.3	-13467	ENSG00000092054	MYH7	myosin heavy chain 7
chr6	49311508	49311777	270	*	Peak_20566	61	.	Distal Intergenic	6	49430360	49463191	32832	2	4594	ENST00000274813.3	151414	ENSG00000146085	MMUT	methylmalonyl-CoA mutase
chr5	19934416	19934683	268	*	Peak_20511	61	.	Intron (ENST00000382275.5/1016, intron 2 of 12)	5	19473573	19886272	412700	2	1016	ENST00000506372.5	-48144	ENSG00000145526	CDH18	cadherin 18
chr12	47645587	47645827	241	*	Peak_19972	61	.	Distal Intergenic	12	47663290	47664843	1554	2	79657	ENST00000548211.1	19016	ENSG00000005175	RPAP3	RNA polymerase II associated protein 3
chr17	70916503	70916845	343	*	Peak_20163	61	.	Distal Intergenic	17	71097775	71202177	104403	2	101928165	ENST00000569074.1	285332	ENSG00000260785	CASC17	cancer susceptibility 17
chr12	38059298	38059558	261	*	Peak_19965	61	.	Distal Intergenic	12	38316578	38329728	13151	1	144245	ENST00000308742.8	-257020	ENSG00000175548	ALG10B	ALG10 alpha-1,2-glucosyltransferase B
chr19	1470316	1470601	286	*	Peak_20199	61	.	3' UTR	19	1474479	1478897	4419	2	148223	ENST00000590621.1	8296	ENSG00000119559	C19orf25	chromosome 19 open reading frame 25
chr16	14298589	14298834	246	*	Peak_20112	61	.	Promoter (2-3kb)	16	14301389	14326761	25373	1	100129781	ENST00000634265.2	-2555	NA	MIR193BHG	MIR193B host gene
chr2	21319722	21319963	242	*	Peak_20287	61	.	Intron (ENST00000435237.1/ENST00000435237.1, intron 1 of 5)	2	21123917	21143272	19356	1	100129278	ENST00000405799.1	195805	ENSG00000218819	TDRD15	tudor domain containing 15
chr4	10074957	10075227	271	*	Peak_20419	61	.	3' UTR	4	10078611	10078692	82	2	100423011	ENST00000585238.1	3465	ENSG00000264931	MIR3138	microRNA 3138
chr11	67736313	67736575	263	*	Peak_19908	61	.	Exon (ENST00000642027.2/ENST00000642027.2, exon 7 of 7)	11	67662162	67681200	19039	2	222	ENST00000530069.5	-55113	ENSG00000132746	ALDH3B2	aldehyde dehydrogenase 3 family member B2
chr1	236176972	236177193	222	*	Peak_19963	61	.	Intron (ENST00000419162.5/7107, intron 1 of 4)	1	236183778	236221865	38088	1	7107	ENST00000477559.2	-6585	ENSG00000077585	GPR137B	G protein-coupled receptor 137B
chr17	82146380	82146632	253	*	Peak_20166	61	.	Intron (ENST00000389641.8/284001, intron 14 of 17)	17	82111986	82152299	40314	2	284001	ENST00000392346.6	5667	ENSG00000176155	CCDC57	coiled-coil domain containing 57
chr3	89328469	89328692	224	*	Peak_20415	61	.	Intron (ENST00000336596.6/2042, intron 3 of 16)	3	89107676	89479659	371984	1	2042	ENST00000494014.1	220793	ENSG00000044524	EPHA3	EPH receptor A3
chr19	2319863	2320085	223	*	Peak_20202	61	.	Intron (ENST00000621615.1/56928, intron 1 of 7)	19	2321521	2324532	3012	2	51690	ENST00000591515.6	4447	ENSG00000130332	LSM7	LSM7 homolog, U6 small nuclear RNA and mRNA degradation associated
chr3	14833652	14834077	426	*	Peak_20875	61	.	Intron (ENST00000285046.9/152273, intron 1 of 19)	3	14821432	14900453	79022	1	152273	ENST00000457774.1	12220	ENSG00000154783	FGD5	FYVE, RhoGEF and PH domain containing 5
chr8	53897085	53897334	250	*	Peak_20887	61	.	Intron (ENST00000297313.7/8601, intron 2 of 5)	8	53880901	53913922	33022	1	8601	ENST00000523064.1	16184	ENSG00000147509	RGS20	regulator of G protein signaling 20
chr17	38673494	38673733	240	*	Peak_20896	61	.	Promoter (1-2kb)	17	38671703	38675421	3719	2	100170841	ENST00000621654.1	1688	ENSG00000273604	EPOP	elongin BC and polycomb repressive complex 2 associated protein
chr1	208286773	208287276	504	*	Peak_20889	61	.	Distal Intergenic	1	208022242	208244320	222079	2	5362	ENST00000367033.3	-42453	ENSG00000076356	PLXNA2	plexin A2
chr8	23528142	23528416	275	*	Peak_21007	60	.	Promoter (<=1kb)	8	23528805	23575463	46659	1	51312	ENST00000519973.5	-389	ENSG00000147454	SLC25A37	solute carrier family 25 member 37
chr20	35975747	35976062	316	*	Peak_21057	60	.	Exon (ENST00000622112.4/140894, exon 4 of 5)	20	35968623	36030669	62047	1	140894	ENST00000538900.1	7124	ENSG00000149646	CNBD2	cyclic nucleotide binding domain containing 2
chr5	115420	115688	269	*	Peak_21071	60	.	Intron (ENST00000637938.1/153478, intron 2 of 19)	5	92151	189970	97820	1	153478	ENST00000637938.1	23269	ENSG00000153404	PLEKHG4B	pleckstrin homology and RhoGEF domain containing G4B
chr13	46316950	46317203	254	*	Peak_21152	60	.	Distal Intergenic	13	46296445	46297844	1400	2	100861554	ENST00000566370.1	-19106	ENSG00000261097	LINC00563	long intergenic non-protein coding RNA 563
chr22	20604118	20604359	242	*	Peak_21171	60	.	Exon (ENST00000416717.6/ENST00000416717.6, exon 15 of 18)	22	20584946	20585423	478	1	51586	ENST00000436496.2	19172	ENSG00000099917	MED15	mediator complex subunit 15
chr15	101294901	101295268	368	*	Peak_21209	60	.	Promoter (<=1kb)	15	101281510	101295251	13742	2	6627	ENST00000254193.10	0	ENSG00000131876	SNRPA1	small nuclear ribonucleoprotein polypeptide A'
chr18	12329350	12329607	258	*	Peak_21312	59	.	3' UTR	18	12310967	12344320	33354	1	84617	ENST00000586691.1	18383	ENSG00000176014	TUBB6	tubulin beta 6 class V
chr1	7453092	7453359	268	*	Peak_21318	59	.	Intron (ENST00000303635.11/23261, intron 5 of 22)	1	7382487	7389754	7268	2	102725193	ENST00000618051.1	-63338	ENSG00000237728	LOC102725193	uncharacterized LOC102725193
chr16	73285215	73285497	283	*	Peak_21368	59	.	Intron (ENST00000641206.2/463, intron 4 of 17)	16	73386805	73421393	34589	1	100506172	ENST00000555721.1	-101308	ENSG00000258779	LINC01568	long intergenic non-protein coding RNA 1568
chr9	135267333	135267817	485	*	Peak_21451	59	.	Distal Intergenic	9	135343249	135346562	3314	1	157927	ENST00000623103.1	-75432	ENSG00000178243	C9orf62	chromosome 9 open reading frame 62
chr20	63352282	63352504	223	*	Peak_21389	59	.	Promoter (2-3kb)	20	63350977	63354566	3590	2	1137	ENST00000637243.1	2062	ENSG00000101204	CHRNA4	cholinergic receptor nicotinic alpha 4 subunit
chr20	5033696	5033986	291	*	Peak_21464	59	.	Distal Intergenic	20	4852356	5010293	157938	2	9962	ENST00000379333.5	-23403	ENSG00000089057	SLC23A2	solute carrier family 23 member 2
chr19	16728981	16729213	233	*	Peak_21462	59	.	Promoter (1-2kb)	19	16727254	16817963	90710	1	284434	ENST00000646016.1	1727	ENSG00000188039	NWD1	NACHT and WD repeat domain containing 1
chr21	39061108	39061560	453	*	Peak_21487	59	.	Distal Intergenic	21	38974429	38977774	3346	2	101928435	ENST00000433952.1	-83334	ENSG00000232837	LINC01700	long intergenic non-protein coding RNA 1700
chr1	12614776	12615054	279	*	Peak_21552	58	.	Promoter (1-2kb)	1	12579768	12616696	36929	2	9249	ENST00000482265.1	1642	ENSG00000162496	DHRS3	dehydrogenase/reductase 3
chr13	40483564	40483826	263	*	Peak_21559	58	.	Promoter (2-3kb)	13	40478766	40481072	2307	2	646982	ENST00000637124.1	-2492	ENSG00000215483	LINC00598	long intergenic non-protein coding RNA 598
chr8	71223423	71223694	272	*	Peak_21572	58	.	Intron (ENST00000647843.1/389668, intron 8 of 8)	8	71197448	71270238	72791	2	2138	ENST00000644424.1	46544	ENSG00000104313	EYA1	EYA transcriptional coactivator and phosphatase 1
chr5	111072978	111073420	443	*	Peak_21640	58	.	Promoter (<=1kb)	5	111073314	111078024	4711	1	85480	ENST00000379706.4	0	ENSG00000145777	TSLP	thymic stromal lymphopoietin
chr2	109453055	109453307	253	*	Peak_21655	58	.	Intron (ENST00000309415.7/344558, intron 8 of 9)	2	109564215	109567853	3639	2	151011	ENST00000483047.5	114546	ENSG00000186522	SEPTIN10	septin 10
chr20	51229667	51229889	223	*	Peak_21669	58	.	Distal Intergenic	20	51391409	51399219	7811	2	4773	ENST00000496054.1	169330	ENSG00000101096	NFATC2	nuclear factor of activated T cells 2
chr2	2850650	2850906	257	*	Peak_21673	58	.	Distal Intergenic	2	2895048	3126026	230979	2	101927554	ENST00000457478.1	275120	ENSG00000234423	LINC01250	long intergenic non-protein coding RNA 1250
chr1	201086054	201086467	414	*	Peak_21730	58	.	Intron (ENST00000367338.7/779, intron 7 of 42)	1	201039512	201112451	72940	2	779	ENST00000367338.7	25984	ENSG00000081248	CACNA1S	calcium voltage-gated channel subunit alpha1 S
chr17	19681846	19682113	268	*	Peak_21760	58	.	Intron (ENST00000325411.9/146802, intron 13 of 16)	17	19672352	19675880	3529	1	224	ENST00000574597.1	9494	ENSG00000072210	ALDH3A2	aldehyde dehydrogenase 3 family member A2
chr11	11183220	11183540	321	*	Peak_21877	58	.	Exon (ENST00000647635.1/ENST00000647635.1, exon 6 of 7)	11	11351942	11353357	1416	2	283106	ENST00000528848.2	169817	ENSG00000254598	CSNK2A3	casein kinase 2 alpha 3
chr7	155813201	155813456	256	*	Peak_21914	58	.	Promoter (<=1kb)	7	155799986	155812273	12288	2	6469	ENST00000297261.6	-928	ENSG00000164690	SHH	sonic hedgehog signaling molecule
chr11	17578770	17579162	393	*	Peak_21927	58	.	Promoter (<=1kb)	11	17578264	17638934	60671	1	340990	ENST00000342528.2	506	ENSG00000188162	OTOG	otogelin
chr8	94119898	94120122	225	*	Peak_21964	58	.	Distal Intergenic	8	94145969	94162128	16160	2	1015	ENST00000520952.1	42006	ENSG00000079112	CDH17	cadherin 17
chr5	17117152	17117388	237	*	Peak_21988	58	.	Intron (ENST00000606445.1/10409, intron 2 of 3)	5	17065598	17275353	209756	1	10409	ENST00000606445.1	51554	ENSG00000176788	BASP1	brain abundant membrane attached signal protein 1
chr5	15497001	15497263	263	*	Peak_22023	57	.	Promoter (2-3kb)	5	15500196	15939791	439596	1	23194	ENST00000504595.1	-2933	ENSG00000183580	FBXL7	F-box and leucine rich repeat protein 7
chr3	23082079	23082341	263	*	Peak_22056	57	.	Distal Intergenic	3	23195070	23202533	7464	2	100505877	ENST00000452251.5	120192	ENSG00000233153	UBE2E2-AS1	UBE2E2 antisense RNA 1 (head to head)
chr11	77512251	77512489	239	*	Peak_22090	57	.	Downstream (2-3kb)	11	77392443	77474635	82193	2	5058	ENST00000526968.1	-37616	ENSG00000149269	PAK1	p21 (RAC1) activated kinase 1
chr11	85321837	85322158	322	*	Peak_22104	57	.	Intron (ENST00000376104.6/1740, intron 3 of 27)	11	84534613	85133123	598511	2	1740	ENST00000527088.1	-188714	ENSG00000150672	DLG2	discs large MAGUK scaffold protein 2
chr9	122398350	122398590	241	*	Peak_22332	57	.	Distal Intergenic	9	122375322	122392788	17467	1	5742	ENST00000373698.7	23028	ENSG00000095303	PTGS1	prostaglandin-endoperoxide synthase 1
chr2	41825367	41825703	337	*	Peak_22293	57	.	Distal Intergenic	2	41876763	41894044	17282	1	388942	ENST00000649168.1	-51060	ENSG00000214691	LINC01913	long intergenic non-protein coding RNA 1913
chr22	37361997	37362277	281	*	Peak_22290	57	.	Intron (ENST00000430883.5/114794, intron 1 of 2)	22	37352190	37354839	2650	2	100506271	ENST00000445088.1	-7158	ENSG00000237862	LOC100506271	uncharacterized LOC100506271
chr20	52473689	52474021	333	*	Peak_22283	57	.	Intron (ENST00000454600.1/101927700, intron 4 of 6)	20	52620838	52650431	29594	1	101927700	ENST00000428009.1	-146817	ENSG00000234948	LINC01524	long intergenic non-protein coding RNA 1524
chr13	42752413	42752633	221	*	Peak_22347	57	.	Distal Intergenic	13	42781550	42791547	9998	1	144809	ENST00000537894.5	-28917	ENSG00000179813	FAM216B	family with sequence similarity 216 member B
chr10	69746718	69746940	223	*	Peak_22339	57	.	Distal Intergenic	10	69801867	69959144	157278	1	1305	ENST00000645393.1	-54927	ENSG00000197467	COL13A1	collagen type XIII alpha 1 chain
chr8	125298306	125298546	241	*	Peak_22382	56	.	Intron (ENST00000517532.5/286053, intron 5 of 6)	8	125363026	125367116	4091	1	286053	ENST00000521460.1	-64480	ENSG00000156831	NSMCE2	NSE2 (MMS21) homolog, SMC5-SMC6 complex SUMO ligase
chr11	16783009	16783460	452	*	Peak_22390	56	.	Intron (ENST00000636090.1/144100, intron 9 of 11)	11	16786293	16789857	3565	2	144100	ENST00000533901.1	6397	ENSG00000166689	PLEKHA7	pleckstrin homology domain containing A7
chr5	172584619	172584883	265	*	Peak_22419	56	.	Distal Intergenic	5	172557392	172559014	1623	2	105377728	ENST00000517916.1	-25605	NA	LINC01944	long intergenic non-protein coding RNA 1944
chr2	148511917	148512165	249	*	Peak_22497	55	.	Promoter (<=1kb)	2	148512234	148512943	710	1	55777	ENST00000637502.1	-69	ENSG00000204406	MBD5	methyl-CpG binding domain protein 5
chr11	26311588	26311847	260	*	Peak_22569	55	.	Promoter (1-2kb)	11	26309599	26660680	351082	1	63982	ENST00000525139.5	1989	ENSG00000134343	ANO3	anoctamin 3
chr5	67342667	67342942	276	*	Peak_22584	55	.	Distal Intergenic	5	67179613	67196799	17187	2	4064	ENST00000256447.5	-145868	ENSG00000134061	CD180	CD180 molecule
chr19	47257195	47257532	338	*	Peak_22580	55	.	Promoter (<=1kb)	19	47257532	47260762	3231	1	26093	ENST00000599398.5	0	ENSG00000105321	CCDC9	coiled-coil domain containing 9
chr21	38482500	38482759	260	*	Peak_22627	55	.	Intron (ENST00000398905.5/2078, intron 1 of 8)	21	38380027	38498442	118416	2	2078	ENST00000398905.5	15683	ENSG00000157554	ERG	ETS transcription factor ERG
chr1	220927794	220928122	329	*	Peak_22623	55	.	Distal Intergenic	1	220881069	220884493	3425	1	3142	ENST00000427693.1	46725	ENSG00000136630	HLX	H2.0 like homeobox
chr3	167187286	167187551	266	*	Peak_22643	55	.	Distal Intergenic	3	167240638	167282321	41684	2	79740	ENST00000464922.5	94770	ENSG00000169064	ZBBX	zinc finger B-box domain containing
chr2	216692233	216692518	286	*	Peak_22675	55	.	Promoter (2-3kb)	2	216678758	216694667	15910	2	3488	ENST00000486341.1	2149	ENSG00000115461	IGFBP5	insulin like growth factor binding protein 5
chr9	31321005	31321312	308	*	Peak_23046	54	.	Distal Intergenic	9	31371611	31381490	9880	2	101929620	ENST00000562065.1	60178	ENSG00000260720	LINC01243	long intergenic non-protein coding RNA 1243
chr1	114282490	114282731	242	*	Peak_22762	54	.	Distal Intergenic	1	114397608	114399609	2002	2	51592	ENST00000478032.1	116878	ENSG00000197323	TRIM33	tripartite motif containing 33
chr4	62358883	62359118	236	*	Peak_22968	54	.	Distal Intergenic	4	62072847	62165554	92708	2	101927186	ENST00000509461.5	-193329	NA	ADGRL3-AS1	adhesion G protein-coupled receptor L3 antisense RNA 1
chr1	233816121	233816379	259	*	Peak_22793	54	.	Distal Intergenic	1	233904933	234324516	419584	1	148641	ENST00000366618.7	-88554	ENSG00000183780	SLC35F3	solute carrier family 35 member F3
chr5	173318443	173318732	290	*	Peak_23078	54	.	Intron (ENST00000265087.8/8614, intron 3 of 3)	5	173318178	173324286	6109	2	8614	ENST00000520593.1	5554	ENSG00000113739	STC2	stanniocalcin 2
chr5	134025744	134026039	296	*	Peak_23088	54	.	Distal Intergenic	5	133971915	134005133	33219	2	7416	ENST00000265333.7	-20611	ENSG00000213585	VDAC1	voltage dependent anion channel 1
chr11	96625702	96625923	222	*	Peak_23116	54	.	Intron (ENST00000527528.1/ENST00000527528.1, intron 1 of 3)	11	96508425	96514748	6324	1	105369443	ENST00000543403.1	117277	ENSG00000256684	LOC105369443	uncharacterized LOC105369443
chr11	17635701	17635918	218	*	Peak_23123	54	.	Exon (ENST00000399391.6/340990, exon 46 of 55)	11	17578264	17638934	60671	1	340990	ENST00000342528.2	57437	ENSG00000188162	OTOG	otogelin
chr5	148927384	148927640	257	*	Peak_23157	54	.	Intron (ENST00000504690.5/79628, intron 18 of 19)	5	149001567	149006912	5346	2	79628	ENST00000643113.1	79272	ENSG00000169247	SH3TC2	SH3 domain and tetratricopeptide repeats 2
chr10	110270203	110270420	218	*	Peak_23162	54	.	Intron (ENST00000332674.9/4601, intron 3 of 5)	10	110298677	110304131	5455	2	10285	ENST00000477763.1	33711	ENSG00000119953	SMNDC1	survival motor neuron domain containing 1
chr6	146334386	146334643	258	*	Peak_23694	53	.	Intron (ENST00000492807.6/2911, intron 4 of 9)	6	146543693	146554965	11273	1	10981	ENST00000367495.3	-209050	ENSG00000118508	RAB32	RAB32, member RAS oncogene family
chr17	41353240	41353678	439	*	Peak_23458	53	.	Promoter (2-3kb)	17	41346092	41350812	4721	2	3883	ENST00000007735.3	-2428	ENSG00000006059	KRT33A	keratin 33A
chr1	200794781	200795058	278	*	Peak_23324	53	.	Intron (ENST00000358823.6/23271, intron 2 of 16)	1	200832108	200832834	727	1	23271	ENST00000532732.1	-37050	ENSG00000118200	CAMSAP2	calmodulin regulated spectrin associated protein family member 2
chr1	173443964	173444233	270	*	Peak_23314	53	.	Promoter (1-2kb)	1	173418074	173442097	24024	2	101928673	ENST00000437190.1	-1867	ENSG00000203739	LOC101928673	uncharacterized LOC101928673
chrX	119485629	119486139	511	*	Peak_23795	53	.	Distal Intergenic	23	119470262	119471081	820	1	292	ENST00000463551.1	15367	ENSG00000005022	SLC25A5	solute carrier family 25 member 5
chr13	110337156	110337382	227	*	Peak_23367	53	.	Intron (ENST00000400163.7/1284, intron 3 of 4)	13	110340958	110341029	72	1	102465872	ENST00000616690.1	-3576	ENSG00000276765	MIR8073	microRNA 8073
chr5	44031109	44031332	224	*	Peak_23679	53	.	Distal Intergenic	5	43677779	43704744	26966	1	23530	ENST00000503059.1	353330	ENSG00000112992	NNT	nicotinamide nucleotide transhydrogenase
chr1	194935102	194935328	227	*	Peak_23320	53	.	Distal Intergenic	1	196044996	196061073	16078	2	105371673	ENST00000430519.1	1125745	NA	LINC01724	long intergenic non-protein coding RNA 1724
chr16	3483021	3483238	218	*	Peak_23431	53	.	Promoter (<=1kb)	16	3483346	3485207	1862	1	79903	ENST00000575754.1	-108	ENSG00000122390	NAA60	N(alpha)-acetyltransferase 60, NatF catalytic subunit
chr20	53463642	53463882	241	*	Peak_23497	53	.	Intron (ENST00000371497.9/128553, intron 2 of 2)	20	53552770	53575863	23094	1	101927770	ENST00000424252.2	-88888	NA	LOC101927770	uncharacterized LOC101927770
chr4	58516217	58516450	234	*	Peak_23650	53	.	Distal Intergenic	4	58524515	58536328	11814	2	105377671	ENST00000509824.1	19878	ENSG00000250340	LINC02494	long intergenic non-protein coding RNA 2494
chr7	99429399	99429774	376	*	Peak_23903	53	.	Exon (ENST00000292478.8/26024, exon 4 of 8)	7	99429098	99435019	5922	2	26024	ENST00000485746.1	5245	ENSG00000106246	PTCD1	pentatricopeptide repeat domain 1
chr8	68473246	68473549	304	*	Peak_23908	53	.	Intron (ENST00000518698.5/116328, intron 4 of 13)	8	68439476	68818274	378799	1	116328	ENST00000521406.5	33770	ENSG00000165084	C8orf34	chromosome 8 open reading frame 34
chr18	26491505	26491986	482	*	Peak_23951	53	.	Intron (ENST00000579973.5/284252, intron 3 of 5)	18	26455713	26476891	21179	2	284252	ENST00000577255.1	-14614	ENSG00000134504	KCTD1	potassium channel tetramerization domain containing 1
chr1	68709966	68710189	224	*	Peak_23945	53	.	Intron (ENST00000643361.1/ENST00000643361.1, intron 2 of 6)	1	68474152	68497221	23070	2	55635	ENST00000370966.9	-212745	ENSG00000024526	DEPDC1	DEP domain containing 1
chr1	96474751	96474972	222	*	Peak_23958	53	.	Distal Intergenic	1	96254069	96374125	120057	2	101928241	ENST00000435311.1	-100626	ENSG00000231987	LINC01787	long intergenic non-protein coding RNA 1787
chr9	214860	215085	226	*	Peak_24010	53	.	Promoter (<=1kb)	9	214865	340620	125756	1	81704	ENST00000524396.5	0	ENSG00000107099	DOCK8	dedicator of cytokinesis 8
chr3	89293644	89293867	224	*	Peak_24031	53	.	Intron (ENST00000336596.6/2042, intron 3 of 16)	3	89107676	89479659	371984	1	2042	ENST00000494014.1	185968	ENSG00000044524	EPHA3	EPH receptor A3
chr22	17074478	17074805	328	*	Peak_24051	53	.	Distal Intergenic	22	17084954	17100469	15516	1	23765	ENST00000477874.1	-10149	ENSG00000177663	IL17RA	interleukin 17 receptor A
chr16	4805175	4805603	429	*	Peak_24104	53	.	Promoter (2-3kb)	16	4796968	4802950	5983	2	79641	ENST00000322048.11	-2225	ENSG00000067836	ROGDI	rogdi atypical leucine zipper
chr9	2015007	2015281	275	*	Peak_24171	53	.	Promoter (<=1kb)	9	2015186	2193620	178435	1	6595	ENST00000357248.8	0	ENSG00000080503	SMARCA2	SWI/SNF related, matrix associated, actin dependent regulator of chromatin, subfamily a, member 2
chr16	67336762	67337003	242	*	Peak_24182	53	.	Intron (ENST00000563303.5/55282, intron 1 of 4)	16	67326980	67347591	20612	1	55282	ENST00000566558.1	9782	ENSG00000159708	LRRC36	leucine rich repeat containing 36
chr2	111018976	111019298	323	*	Peak_24189	53	.	Intron (ENST00000389811.8/55289, intron 15 of 18)	2	110995957	111018073	22117	1	55289	ENST00000496981.1	23019	ENSG00000153093	ACOXL	acyl-CoA oxidase like
chr17	77640256	77640523	268	*	Peak_24186	53	.	Intron (ENST00000649512.1/ENST00000649512.1, intron 3 of 4)	17	77558142	77563243	5102	1	100507351	ENST00000591283.1	82114	NA	LOC100507351	uncharacterized LOC100507351
chr17	64573452	64573879	428	*	Peak_24206	53	.	Intron (ENST00000582081.5/64750, intron 9 of 18)	17	64557641	64563165	5525	2	64750	ENST00000580072.5	-10287	ENSG00000108854	SMURF2	SMAD specific E3 ubiquitin protein ligase 2
chr1	48230468	48230832	365	*	Peak_24295	53	.	Promoter (1-2kb)	1	48229080	48231578	2499	1	200010	ENST00000527929.1	1388	ENSG00000117834	SLC5A9	solute carrier family 5 member 9
chr17	54418282	54418552	271	*	Peak_24330	53	.	Distal Intergenic	17	54899387	54937316	37930	1	10040	ENST00000570371.5	-480835	ENSG00000141198	TOM1L1	target of myb1 like 1 membrane trafficking protein
chr1	151145682	151146021	340	*	Peak_24240	53	.	Promoter (<=1kb)	1	151131685	151146457	14773	2	10500	ENST00000368912.7	436	ENSG00000143434	SEMA6C	semaphorin 6C
chr12	132550957	132551259	303	*	Peak_24263	53	.	Exon (ENST00000624087.1/ENST00000624087.1, exon 1 of 1)	12	132560047	132570104	10058	1	57666	ENST00000539264.5	-8788	ENSG00000112787	FBRSL1	fibrosin like 1
chr3	50274491	50274828	338	*	Peak_24649	52	.	Promoter (<=1kb)	3	50274634	50276444	1811	1	7869	ENST00000416295.1	0	ENSG00000012171	SEMA3B	semaphorin 3B
chr7	156604722	156605104	383	*	Peak_24667	52	.	Promoter (<=1kb)	7	156605132	156605744	613	2	100506380	ENST00000440711.1	640	ENSG00000182648	LINC01006	long intergenic non-protein coding RNA 1006
chr19	1104235	1104720	486	*	Peak_24712	52	.	Promoter (<=1kb)	19	1104415	1105761	1347	1	2879	ENST00000585362.6	0	ENSG00000167468	GPX4	glutathione peroxidase 4
chr11	64292888	64293218	331	*	Peak_24924	52	.	Promoter (<=1kb)	11	64292659	64299907	7249	1	50801	ENST00000539216.1	229	ENSG00000182450	KCNK4	potassium two pore domain channel subfamily K member 4
chr8	127514250	127514481	232	*	Peak_24997	52	.	Distal Intergenic	8	127443350	127482139	38790	2	727677	ENST00000502056.1	-32111	ENSG00000246228	CASC8	cancer susceptibility 8
chr20	25853678	25853987	310	*	Peak_25011	52	.	Intron (ENST00000478164.1/728882, intron 1 of 4)	20	25775255	25859903	84649	2	728882	ENST00000584356.1	5916	NA	FAM182B	family with sequence similarity 182 member B
chr10	52265510	52265816	307	*	Peak_25036	52	.	Intron (ENST00000401604.7/5592, intron 10 of 17)	10	52230742	52301302	70561	2	100506939	ENST00000452247.6	35486	NA	PRKG1-AS1	PRKG1 antisense RNA 1
chr1	26200583	26200871	289	*	Peak_25048	52	.	Exon (ENST00000338855.6/378807, exon 8 of 9)	1	26209741	26227840	18100	1	101928303	ENST00000428812.1	-8870	ENSG00000236155	LOC101928303	uncharacterized LOC101928303
chr9	136199281	136199740	460	*	Peak_25111	51	.	Promoter (1-2kb)	9	136196252	136201674	5423	2	8022	ENST00000619587.1	1934	ENSG00000107187	LHX3	LIM homeobox 3
chr15	64718376	64718605	230	*	Peak_25098	51	.	Exon (ENST00000560387.1/ENST00000560387.1, exon 2 of 2)	15	64687573	64703281	15709	2	4947	ENST00000326005.10	-15095	ENSG00000180304	OAZ2	ornithine decarboxylase antizyme 2
chr8	119582781	119583001	221	*	Peak_25128	51	.	Promoter (1-2kb)	8	119557087	119581107	24021	2	5168	ENST00000523861.1	-1674	ENSG00000136960	ENPP2	ectonucleotide pyrophosphatase/phosphodiesterase 2
chr5	13592235	13592455	221	*	Peak_25123	51	.	Distal Intergenic	5	13762751	13771282	8532	2	1767	ENST00000504001.3	178827	ENSG00000039139	DNAH5	dynein axonemal heavy chain 5
chr8	143316787	143317054	268	*	Peak_25178	51	.	Promoter (<=1kb)	8	143304384	143315807	11424	2	116447	ENST00000519977.5	-980	ENSG00000184428	TOP1MT	DNA topoisomerase I mitochondrial
chr11	65300325	65300612	288	*	Peak_25180	51	.	Intron (ENST00000649896.1/23649, intron 17 of 19)	11	65294178	65297552	3375	1	23649	ENST00000534785.1	6147	ENSG00000014138	POLA2	DNA polymerase alpha 2, accessory subunit
chr1	53871679	53872001	323	*	Peak_25188	51	.	Intron (ENST00000464950.6/54432, intron 5 of 10)	1	53851719	53889733	38015	2	54432	ENST00000464950.6	17732	ENSG00000058799	YIPF1	Yip1 domain family member 1
chr3	72337673	72338064	392	*	Peak_25263	51	.	Distal Intergenic	3	72061061	72279503	218443	2	285286	ENST00000626474.2	-58170	ENSG00000241163	LINC00877	long intergenic non-protein coding RNA 877
chr20	18699735	18699996	262	*	Peak_25253	51	.	Promoter (1-2kb)	20	18674395	18698709	24315	2	101929526	ENST00000428285.1	-1026	ENSG00000233993	LOC101929526	uncharacterized LOC101929526
chr11	70065034	70065261	228	*	Peak_25232	51	.	Promoter (<=1kb)	11	70056230	70065371	9142	2	101928443	ENST00000511013.2	110	ENSG00000248844	LOC101928443	uncharacterized LOC101928443
chr3	16166111	16166458	348	*	Peak_25258	51	.	Distal Intergenic	3	16174649	16229746	55098	1	117248	ENST00000339732.9	-8191	ENSG00000131386	GALNT15	polypeptide N-acetylgalactosaminyltransferase 15
chr2	110739699	110739917	219	*	Peak_25298	51	.	Intron (ENST00000389811.8/55289, intron 1 of 18)	2	110732855	110793700	60846	1	55289	ENST00000448863.1	6844	ENSG00000153093	ACOXL	acyl-CoA oxidase like
chr17	47700980	47701233	254	*	Peak_25311	51	.	Intron (ENST00000361722.7/9755, intron 6 of 8)	17	47695685	47711490	15806	1	9755	ENST00000622396.1	5295	ENSG00000198933	TBKBP1	TBK1 binding protein 1
chr18	44652021	44652259	239	*	Peak_25318	51	.	Distal Intergenic	18	44680173	44877414	197242	1	26040	ENST00000426838.8	-27914	ENSG00000152217	SETBP1	SET binding protein 1
chr3	37442725	37442959	235	*	Peak_25410	50	.	Distal Intergenic	3	37452115	37629519	177405	1	3680	ENST00000422441.5	-9156	ENSG00000144668	ITGA9	integrin subunit alpha 9
chr11	77980653	77980870	218	*	Peak_25451	50	.	Intron (ENST00000433818.6/92105, intron 3 of 23)	11	77977889	77994653	16765	2	92105	ENST00000534408.5	13783	ENSG00000149262	INTS4	integrator complex subunit 4
chr5	55093313	55093530	218	*	Peak_25526	50	.	Intron (ENST00000503054.1/ENST00000503054.1, intron 3 of 3)	5	55102648	55110252	7605	1	3001	ENST00000274306.6	-9118	ENSG00000145649	GZMA	granzyme A
chr3	9427262	9427520	259	*	Peak_25558	50	.	Promoter (1-2kb)	3	9428925	9478154	49230	1	55209	ENST00000407969.5	-1405	ENSG00000168137	SETD5	SET domain containing 5
chr1	186376044	186376297	254	*	Peak_25568	50	.	Promoter (<=1kb)	1	186375869	186421378	45510	1	54953	ENST00000287859.10	175	ENSG00000157181	ODR4	odr-4 GPCR localization factor homolog
chr8	135583485	135583702	218	*	Peak_25598	50	.	Intron (ENST00000355849.9/10656, intron 6 of 8)	8	135593331	135647184	53854	1	10656	ENST00000522433.1	-9629	ENSG00000131773	KHDRBS3	KH RNA binding domain containing, signal transduction associated 3
chr9	98612002	98612301	300	*	Peak_25617	50	.	Intron (ENST00000259455.3/9568, intron 1 of 18)	9	98473336	98607650	134315	2	9568	ENST00000634227.1	-4352	ENSG00000136928	GABBR2	gamma-aminobutyric acid type B receptor subunit 2
chr2	85732916	85733233	318	*	Peak_25620	50	.	Distal Intergenic	2	85751344	85788066	36723	1	84913	ENST00000469442.5	-18111	ENSG00000168874	ATOH8	atonal bHLH transcription factor 8
chr7	155184891	155185145	255	*	Peak_25671	50	.	Distal Intergenic	7	155077138	155084615	7478	1	3361	ENST00000486819.1	107753	ENSG00000157219	HTR5A	5-hydroxytryptamine receptor 5A
chr9	37911441	37911781	341	*	Peak_25685	50	.	Intron (ENST00000540557.1/6461, intron 6 of 11)	9	37879400	37904353	24954	2	92014	ENST00000496760.5	-7088	ENSG00000122696	SLC25A51	solute carrier family 25 member 51
chr5	98844387	98844795	409	*	Peak_25681	50	.	Distal Intergenic	5	98856425	98858664	2240	2	1105	ENST00000513064.1	13869	ENSG00000153922	CHD1	chromodomain helicase DNA binding protein 1
chr8	49746312	49746540	229	*	Peak_25738	49	.	Distal Intergenic	8	49909789	50792829	883041	1	54212	ENST00000518864.5	-163249	ENSG00000147481	SNTG1	syntrophin gamma 1
chr8	66909695	66910054	360	*	Peak_25744	49	.	Intron (ENST00000422365.6/157777, intron 14 of 14)	8	66922467	66922555	89	2	641648	ENST00000364849.1	12501	ENSG00000254341	SNORD87	small nucleolar RNA, C/D box 87
chr13	27338308	27338655	348	*	Peak_25752	49	.	Distal Intergenic	13	27271586	27273400	1815	1	387496	ENST00000480803.1	66722	ENSG00000122035	RASL11A	RAS like family 11 member A
chr16	14971739	14971964	226	*	Peak_25827	49	.	Promoter (2-3kb)	16	14974591	15036678	62088	1	23042	ENST00000563679.5	-2627	ENSG00000179889	PDXDC1	pyridoxal dependent decarboxylase domain containing 1
chr17	78313047	78313377	331	*	Peak_25884	49	.	Distal Intergenic	17	78261349	78278492	17144	2	100996291	ENST00000374945.1	-34555	ENSG00000204277	LINC01993	long intergenic non-protein coding RNA 1993
chr3	57006762	57006991	230	*	Peak_25940	49	.	Intron (ENST00000338458.8/50650, intron 2 of 12)	3	56773767	56977375	203609	2	50650	ENST00000486829.1	-29387	ENSG00000163947	ARHGEF3	Rho guanine nucleotide exchange factor 3
chr14	61826421	61826692	272	*	Peak_25993	48	.	Intron (ENST00000554138.1/ENST00000554138.1, intron 1 of 1)	14	61812721	62075391	262671	1	83851	ENST00000636133.1	13700	ENSG00000139973	SYT16	synaptotagmin 16
chr3	46700513	46700752	240	*	Peak_26004	48	.	Promoter (<=1kb)	3	46701312	46710886	9575	1	259236	ENST00000643606.1	-560	ENSG00000181585	TMIE	transmembrane inner ear
chr13	40794016	40794242	227	*	Peak_26010	48	.	Promoter (<=1kb)	13	40793158	40807426	14269	1	10166	ENST00000470509.1	858	ENSG00000102743	SLC25A15	solute carrier family 25 member 15
chr11	66790349	66790854	506	*	Peak_26008	48	.	Promoter (2-3kb)	11	66788160	66804194	16035	1	79703	ENST00000532089.5	2189	ENSG00000173715	C11orf80	chromosome 11 open reading frame 80
chr8	96493824	96494267	444	*	Peak_26084	48	.	Promoter (<=1kb)	8	96494008	96609643	115636	1	6383	ENST00000522911.5	0	ENSG00000169439	SDC2	syndecan 2
chr5	143522434	143522651	218	*	Peak_26133	48	.	Intron (ENST00000340585.6/ENST00000340585.6, intron 1 of 1)	5	143277931	143435512	157582	2	2908	ENST00000343796.6	-86922	ENSG00000113580	NR3C1	nuclear receptor subfamily 3 group C member 1
chr8	143362790	143363040	251	*	Peak_26156	48	.	Promoter (2-3kb)	8	143343199	143359979	16781	2	116447	ENST00000505857.2	-2811	ENSG00000184428	TOP1MT	DNA topoisomerase I mitochondrial
chr6	44720232	44720449	218	*	Peak_26189	48	.	Distal Intergenic	6	44829767	44955510	125744	2	8464	ENST00000371458.1	235061	ENSG00000196284	SUPT3H	SPT3 homolog, SAGA and STAGA complex component
chr19	19668740	19669087	348	*	Peak_26178	48	.	Promoter (<=1kb)	19	19668796	19679523	10728	1	94039	ENST00000541458.5	0	ENSG00000181896	ZNF101	zinc finger protein 101
chr17	75971409	75971636	228	*	Peak_26226	47	.	Intron (ENST00000293217.9/51, intron 2 of 13)	17	75973309	75978693	5385	2	51	ENST00000576743.1	7057	ENSG00000161533	ACOX1	acyl-CoA oxidase 1
chr8	52997045	52997276	232	*	Peak_26258	47	.	Distal Intergenic	8	52938431	52941117	2687	1	2831	ENST00000331251.3	58614	ENSG00000183729	NPBWR1	neuropeptides B and W receptor 1
chr1	40903758	40904000	243	*	Peak_26216	47	.	Distal Intergenic	1	40861051	40862366	1316	2	163732	ENST00000372638.3	-41392	ENSG00000179862	CITED4	Cbp/p300 interacting transactivator with Glu/Asp rich carboxy-terminal domain 4
chr2	160262788	160263007	220	*	Peak_26348	47	.	Intron (ENST00000485635.1/3694, intron 1 of 9)	2	160257840	160271249	13410	2	100505984	ENST00000477514.1	8242	ENSG00000285373	LINC02478	long intergenic non-protein coding RNA 2478
chr19	53953220	53953449	230	*	Peak_26336	47	.	Distal Intergenic	19	53963040	53990215	27176	1	59283	ENST00000270458.2	-9591	ENSG00000142408	CACNG8	calcium voltage-gated channel auxiliary subunit gamma 8
chr5	64729519	64729736	218	*	Peak_26392	47	.	Intron (ENST00000513458.8/285672, intron 3 of 4)	5	64691319	64718082	26764	1	100132916	ENST00000513930.1	38200	ENSG00000145642	SHISAL2B	shisa like 2B
chr2	103567983	103568231	249	*	Peak_26339	47	.	Distal Intergenic	2	102967408	102984429	17022	2	105373519	ENST00000431897.1	-583554	ENSG00000224095	LINC01935	long intergenic non-protein coding RNA 1935
chr3	77203837	77204055	219	*	Peak_26376	47	.	Intron (ENST00000487694.7/6092, intron 3 of 26)	3	77040730	77647116	606387	1	6092	ENST00000473767.5	163107	ENSG00000185008	ROBO2	roundabout guidance receptor 2
chr1	202717808	202718045	238	*	Peak_26285	47	.	Distal Intergenic	1	202590596	202710417	119822	2	127833	ENST00000367268.4	-7391	ENSG00000143858	SYT2	synaptotagmin 2
chr2	122066656	122066929	274	*	Peak_26341	47	.	Distal Intergenic	2	121756171	121765661	9491	1	7247	ENST00000409193.1	310485	ENSG00000211460	TSN	translin
chr1	112675590	112675818	229	*	Peak_26506	47	.	Promoter (<=1kb)	1	112674745	112700710	25966	1	4343	ENST00000357443.2	845	ENSG00000155363	MOV10	Mov10 RISC complex RNA helicase
chr2	5282919	5283175	257	*	Peak_26603	47	.	Distal Intergenic	2	5677142	5691046	13905	2	102723818	ENST00000420221.1	407871	NA	LINC01248	long intergenic non-protein coding RNA 1248
chr1	10949282	10949858	577	*	Peak_26615	47	.	Promoter (<=1kb)	1	10946471	10949751	3281	2	148345	ENST00000476357.1	0	ENSG00000175262	C1orf127	chromosome 1 open reading frame 127
chr1	3090656	3090881	226	*	Peak_26743	47	.	Intron (ENST00000511072.5/63976, intron 1 of 15)	1	3069211	3438621	369411	1	63976	ENST00000270722.9	21445	ENSG00000142611	PRDM16	PR/SET domain 16
chr20	23773110	23773456	347	*	Peak_26856	47	.	Intron (ENST00000610599.1/ENST00000610599.1, intron 2 of 2)	20	23747731	23751268	3538	2	1469	ENST00000398402.1	-21842	ENSG00000170373	CST1	cystatin SN
chr20	36050396	36050887	492	*	Peak_27095	47	.	Promoter (<=1kb)	20	36045622	36050960	5339	2	647979	ENST00000565493.1	73	ENSG00000260032	NORAD	non-coding RNA activated by DNA damage
chr1	16431180	16431493	314	*	Peak_26952	47	.	Promoter (<=1kb)	1	16425097	16431371	6275	2	374955	ENST00000612240.1	0	ENSG00000187144	SPATA21	spermatogenesis associated 21
chr17	63599998	63600243	246	*	Peak_27059	47	.	Promoter (<=1kb)	17	63600872	63608365	7494	1	51204	ENST00000258975.6	-629	ENSG00000136463	TACO1	translational activator of cytochrome c oxidase I
chr6	14401291	14401538	248	*	Peak_27217	47	.	Intron (ENST00000434947.1/ENST00000434947.1, intron 2 of 2)	6	14283048	14285454	2407	2	102216342	ENST00000635227.1	-115837	ENSG00000226673	LINC01108	long intergenic non-protein coding RNA 1108
chr20	47241527	47241761	235	*	Peak_27098	47	.	Intron (ENST00000311275.11/23613, intron 14 of 21)	20	47210413	47298900	88488	2	23613	ENST00000467200.6	57139	ENSG00000101040	ZMYND8	zinc finger MYND-type containing 8
chr11	2103050	2103559	510	*	Peak_26939	47	.	Distal Intergenic	11	2134134	2134209	76	2	619552	ENST00000385070.3	30650	ENSG00000207805	MIR483	microRNA 483
chr15	66542172	66542410	239	*	Peak_27025	47	.	Promoter (2-3kb)	15	66540153	66546887	6735	1	55055	ENST00000569489.1	2019	ENSG00000174442	ZWILCH	zwilch kinetochore protein
chr17	82846418	82846710	293	*	Peak_27066	47	.	Intron (ENST00000355528.8/6904, intron 13 of 38)	17	82829435	82840578	11144	2	79755	ENST00000269394.3	-5840	ENSG00000141579	ZNF750	zinc finger protein 750
chr21	9769200	9769505	306	*	Peak_27123	47	.	Distal Intergenic	21	9806875	9809723	2849	2	441058	ENST00000623933.1	40218	NA	LINC01667	long intergenic non-protein coding RNA 1667
chr19	8663981	8664252	272	*	Peak_27090	47	.	Distal Intergenic	19	8697454	8698705	1252	2	284382	ENST00000612068.1	34453	ENSG00000181786	ACTL9	actin like 9
chr12	69548277	69548494	218	*	Peak_27529	46	.	Intron (ENST00000547219.5/10818, intron 4 of 6)	12	69557789	69579789	22001	1	10818	ENST00000397997.6	-9295	ENSG00000166225	FRS2	fibroblast growth factor receptor substrate 2
chr5	99791984	99792329	346	*	Peak_28270	46	.	Distal Intergenic	5	99549432	99577957	28526	1	102724855	ENST00000510302.1	242552	NA	LINC02113	long intergenic non-protein coding RNA 2113
[truncated: 293 more rows]
