# Supplementary material for: lncRNA-ZFAS1, an emerging gate-keeper in DNA damage-dependent transcriptional regulation
Source: Research Square preprint supplement (doi:10.21203/rs.3.rs-3233912/v1), 2023-09-13
Supplement: Supplementary file 3 [file 1724e7b0a8678f9bf5bed942.xlsx]

## Sheet: mRNA.transcripts.FPKM
transcriptID	C_0	C_3	C_6	C_9	C_12	C_24	UV_3	UV_6	UV_9	UV_12	UV_24	UV_48	UV_72	UV_96
ENST00000331825	2228.24	1973.6	2131.4	2086.2	2325.24	2397.51	3133.12	3123.42	2827.76	2879.2	2217.93	1532.47	1409.99	1567.85
ENST00000331523	1830.45	1570.86	1653.79	1659.96	2075.06	1982.69	2081.8	1945.7	1871.62	1959.12	1702.98	1456.4	1674.51	1779.88
ENST00000229239	1827.91	1732.36	1957.48	1714.77	1690.82	2083.71	2018.56	1983.69	1765.27	1892.97	1323.37	1460.53	1474.36	1671.86
ENST00000528292	1293.67	466.073	414.817	542.444	489.017	467.548	510.131	393.048	547.385	516.66	379.869	422.158	495.231	59.3133
ENST00000451311	1224.82	2184.75	2210.07	2164.91	2269.02	2751.31	2407.96	2281.2	2110.17	1901.69	1241.9	2128.78	1963.87	2287.54
ENST00000534319	1047.58	821.164	867.349	923.179	1209.48	990.803	1113.26	996.237	875.217	889.202	590.438	639.121	754.89	411.79
ENST00000621411	1044.6	5510.61	2624.64	1215.59	1968.87	2654.92	1972.46	1363.39	1754.14	2451.55	968.052	1337.97	1075.97	973.622
ENST00000327892	1031.97	802.077	930.309	889.504	777.69	782.276	892.146	915.609	697.794	813.969	469.421	571.71	661.05	547.078
ENST00000614247	964.622	9065.64	3846.2	1492.99	2396.38	4066.52	2430.94	1811.95	2872.84	3248.27	1245.41	1716.67	1438.53	1368.21
ENST00000501597	930.568	1930.34	1836.13	2235.65	2231.38	2136.87	2619.44	2791.07	2672.15	3240.63	2147.12	2193.36	1556.49	2120.64
ENST00000355057	913.692	11443.6	3062.93	1746.97	2564.47	2010.57	3078.46	2620.92	3132.45	3148.59	1821.28	2532.94	2131.74	2712.51
ENST00000348462	856.428	1521.15	1452.98	1500.17	1754.7	1503.18	1996.69	1945.96	1890.08	2164.84	1292.95	1449.33	1378.04	1313.12
ENST00000525634	822.427	1173.37	1134.76	1259.09	972.108	851.764	1509.32	1110.53	1004.69	1093.84	906.256	898.893	1172.11	1129.6
ENST00000304921	786.572	1169.04	1148.39	1255.54	1280.39	1155.43	1391.86	1315.18	1222.9	1153.07	998.058	1084.81	1009.03	1066.97
ENST00000575087	750.023	165.776	894.636	350.462	133.637	479.108	789.262	728.901	25.6468	55.9526	210.338	64.6387	401.109	27.0711
ENST00000253788	733.479	1405.72	1380.99	1544	1431.37	1247.01	1754.99	1724.22	1601.98	1670.75	1297.08	1387.6	1169.92	1426.28
ENST00000314133	724.726	1231.42	1204.53	1333.86	1267.87	1231.29	1529.16	1677.02	1638.34	1671.62	1176.8	1239.08	943.568	1161.61
ENST00000009589	724.403	1062.66	999.498	1039.04	1114.36	1036.87	1358.44	1337.02	1263.17	1125.71	794.142	898.988	973.588	1103.22
ENST00000319248	720.966	748.292	803.143	798.375	871.875	758.74	920.331	936.304	932.611	910.376	711.345	584.008	598.918	534.526
ENST00000368719	719.229	1558.39	1587.46	1644.26	1347.17	1608.51	1623.64	1618.22	1679.73	1410.94	1178.46	1936.5	1733.56	2189.06
ENST00000618305	679.194	8982.68	3252.04	1536.15	2426.08	2782.23	2011.89	1311.76	2003.96	2160.69	991.254	1122.89	779.142	757.299
ENST00000396651	669.251	808.29	814.858	848.458	957.253	862.994	1029.14	929.018	847.023	910.621	740.366	839.357	799.382	860.822
ENST00000361624	624.39	217.745	240.782	241.405	169.081	233.639	269.761	396.733	201.004	291.51	339.625	252.823	202.125	213.345
ENST00000443003	613.627	882.363	833.374	775.973	685.791	720.824	927.557	822.882	804.647	748.932	633.085	628.416	658.299	687.755
ENST00000533186	600.278	260.883	833.179	702.712	652.145	467.004	771.203	608.576	632.878	734.242	517.131	483.436	534.639	571.276
ENST00000216281	596.513	35.2821	24.4831	25.1358	120.957	32.7745	44.2182	218.04	96.4923	43.4978	64.478	28.4936	33.2602	23.0589
ENST00000377803	581.584	3796.86	1999.35	878.623	1367.96	2080.82	1556.17	1324.38	1701.24	1720.48	855.907	1000.74	785.057	755.079
ENST00000233143	565.168	1035.78	1148.57	1369.45	1415.67	1287.63	1017.25	1568.39	6030.61	1314.24	872.605	590.338	783.564	1103.25
ENST00000336023	554.785	656.886	808.966	861.363	945.186	636.614	802.589	928.213	523.453	1037.69	456.823	609.677	448.841	541.11
ENST00000439602	547.075	892.14	911.459	1025.99	1048.37	959.601	1155.33	1211.32	1220.37	1221.5	901.345	1042.25	987.858	1150.24
ENST00000422514	539.539	957.456	932.838	1077.69	1005.96	889.33	1146.06	1166.56	1128.32	1144.64	876.05	994.435	899.796	972.768
ENST00000361436	539.491	765.333	797.61	846.579	893.454	777.496	990.544	1029.03	933.508	974.968	769.792	726.175	697.876	804.14
ENST00000421017	537.396	618.218	713.198	726.564	750.088	690.041	680.583	613.781	582.676	498.822	441.627	454.904	449.417	417.483
ENST00000343677	516.624	3685.96	1696.64	738.88	1330.36	1672.79	924.368	697.116	874.712	1224.47	652.215	983.694	950.395	1106.01
ENST00000391857	515.518	610.642	624.387	758.663	944.948	775.804	911.899	787.75	905.067	1017.03	836.934	820.836	746.153	838.636
ENST00000330244	507.4	987.128	933.375	1002.75	1191.81	981.913	1285.73	1211.42	940.662	1119.66	888.845	1098.52	798.407	880.197
ENST00000352983	498.844	811.698	798.349	812.842	858.769	732.102	934.963	879.194	850.942	783.01	687.047	707.929	672.151	721.176
ENST00000371646	495.774	420.129	426.636	489.155	556.039	457.497	485.171	512.418	323.665	465.293	421.295	435.627	473.902	351.178
ENST00000340384	489.693	457.745	614.722	700.443	550.491	530.078	596.885	593.226	470.606	774.693	431.18	373.18	434.592	276.268
ENST00000215909	488.769	732.364	845.955	952.393	1191.99	951.336	1154.58	1101.99	674.515	956.22	553.147	1054.64	931.639	867.135
ENST00000356950	482.727	2676.85	1534.55	630.036	1047.18	1261.62	1201.28	988.629	1105.63	1236.6	645.583	919.064	728.678	624.769
ENST00000224237	461.796	372.291	578.373	589.55	528.564	596.115	457.023	656.685	235.303	388.062	393.579	417.296	518.09	529.46
ENST00000304218	459.575	2358.28	1143.79	461.636	864.243	1244.88	803.111	532.489	617.46	940.544	504.304	748.292	660.706	699.317
ENST00000611927	447.048	4151.09	3577.38	539.346	867.105	2502.49	1976.87	2971.98	3547.83	3587.97	848.022	1238.67	2478.9	3189.43
ENST00000230050	437.318	621.051	597.571	609.54	705.819	628.703	869.347	862.818	814.544	785.509	633.994	692.387	706.338	768.844
ENST00000468812	426.237	542.658	567.565	585.472	613.242	536.774	692.885	642.965	592.403	608.781	374.571	422.124	414.512	345.451
ENST00000369159	417.033	3080.35	1501.67	634.243	898.896	1038.29	1014.14	899.256	1377.71	1788.94	741.578	944.186	797.213	725.663
ENST00000395422	412.852	532.302	563.49	563.99	554.303	558.152	636.16	635.839	586.212	557.847	444.354	541.11	529.792	566.265
ENST00000260379	412.22	404.057	521.678	396.813	254.475	305.783	408.127	436.706	258.795	546.031	344.523	433.175	349.162	397.763
ENST00000222247	408.633	585.349	602.794	656.436	625.918	605.102	742.537	831.763	746.453	880.831	626.506	636.673	713.465	756.938
ENST00000396984	400.644	2699.4	1333.38	629.824	944.754	1222.59	943.883	717.17	908.476	937.825	398.253	661.998	556.794	485.996
ENST00000229379	394.553	674.241	645.683	693.741	705.273	671.975	809.583	825.816	790.06	823.702	622.281	709.388	541.921	655.832
ENST00000529639	394.492	473.569	549.865	612.785	653.267	618.454	752.094	867.221	856.033	876.409	644.092	684.112	587.342	648.568
ENST00000612966	391.215	3864.59	1793.86	713.399	1386.04	1389.39	929.54	786.115	1150.33	1608.91	728.24	1120.29	1003.77	1061.17
ENST00000573283	390.599	722.502	53.6898	567.909	498.005	81.0921	401.261	407.574	336.426	331.087	114.055	432.653	47.5853	424.945
ENST00000645576	385.999	46.1276	9.03416	28.6954	15.1026	27.1622	14.6331	18.1556	42.5787	12.6025	7.17627	10.6869	21.3503	54.7268
ENST00000607355	383.424	2861.06	1394.85	544.697	810.094	909.168	910.955	794.283	1228.84	1624.93	671.16	851.572	744.94	673.65
ENST00000377459	376.968	3670.16	1709.74	738.726	1275.12	1480.57	1041.5	875.399	1329.82	1556.32	575.42	800.341	661.087	623.053
ENST00000618052	370.758	3288.62	1286.35	583.533	965.549	1161.35	848.16	685.106	847.491	942.449	436.787	756.238	748.867	838.958
ENST00000600467	361.413	56.4442	28.0949	56.5609	502.061	67.5084	622.369	582.891	284.122	334.737	613.68	102.97	343.294	154.464
ENST00000527673	359.985	648.007	603.913	686.311	780.878	644.137	901.56	857.375	853.396	826.372	610.616	733.214	622.168	727.33
ENST00000359611	357.672	2594.9	1195.02	537.027	1019.39	1083.89	1006.02	796.99	941.057	110.739	47.0681	75.9326	45.8792	570.278
ENST00000331442	354.515	2463.78	1081.21	467.469	1010.92	1253.57	583.094	394.073	527.327	883.649	372.248	600.724	520.575	431.714
ENST00000309311	352.656	356.698	370.8	378.28	429.422	367.361	428.405	421.628	360.616	485.824	470.69	431.14	404.969	402.96
ENST00000356476	342.207	2929.78	1255.2	479.572	702.998	1102.6	715.749	500.045	647.232	938.524	332.423	547.844	542.474	477.224
ENST00000270625	341.972	419.385	519.204	545.328	503.478	562.446	519.295	637.296	518.484	686.838	449.46	449.065	389.241	433.387
ENST00000356005	337.313	177.055	219.248	196.907	174.036	127.581	179.853	168.948	100.734	138.368	143.685	183.17	284.892	221.494
ENST00000223095	336.42	421.338	482.412	487.656	578.166	274.444	263.577	259.335	147.315	133.574	160.386	449.737	449.414	357.753
ENST00000322203	335.072	476.503	459.905	494.246	689.554	595.004	674.958	613.665	522.669	512.842	462.557	578.477	474.533	515.738
ENST00000309268	332.694	429.237	431.877	457.363	498.757	484.821	506.943	501.675	470.977	473.855	386.23	423.3	438.118	544.743
ENST00000257497	332.29	372.651	426.503	432.386	383.377	366.551	365.364	364.739	290.015	263.422	314.979	369.472	355.333	318.814
ENST00000377777	327.39	1735.61	850.38	361.836	596.006	750.804	845.771	634.003	866.164	944.316	427.794	422.928	359.73	385.472
ENST00000301821	323.413	369.555	411.824	472.119	523.617	462.302	555.251	603.78	571.811	660.149	444.935	490.229	390.813	426.164
ENST00000315377	316.808	677.83	681.309	725.467	816.224	766.822	863.274	773.808	752.61	0	623.441	725.368	715.327	573.724
ENST00000311111	308.474	802.307	722.089	834.369	707.36	621.515	819.327	790.613	768.218	766.506	551.135	650.581	556.966	673.656
ENST00000549920	308.336	443.297	393.099	489.185	342.061	290.836	372.939	390.789	606.235	600.827	544.783	351.792	395.389	212.963
ENST00000287038	304.608	523.614	510.392	599.805	524.718	609.636	773.368	817.789	714.846	747.894	560.402	514.942	298.522	584.483
ENST00000424576	303.805	341.833	192.364	209.51	384.933	379.127	360.141	355.476	357.302	370.869	361.22	355.605	355.724	274.556
ENST00000247655	301.295	420.532	440.156	477.296	414.68	424.689	496.443	524.534	458.095	454.41	340.592	423.946	391.863	455.08
ENST00000644759	299.616	394.937	382.102	337.029	456.547	401.808	445.887	310.268	270.765	396.374	389.578	360.318	277.871	289.12
ENST00000311549	298.605	485.594	463.836	580.969	615.645	510.837	634.782	655.722	691.335	661.852	500.863	543.712	442.246	518.235
ENST00000512737	295.683	485.53	501.52	568.803	641.397	514.913	654.972	667.63	634.95	652.442	423.632	556.452	457.254	454.003
ENST00000335895	295.311	276.032	280.495	307.273	318.522	278.985	370.063	350.427	273.136	321.663	307.833	294.313	246.99	243.342
ENST00000377745	293.93	4948.35	1759.22	713.953	1032.6	1173.56	726.493	534.221	930.848	1024.35	521.148	575.39	626.915	675.049
ENST00000215754	285.696	471.282	516.254	533.055	538.376	580.487	626.145	628.651	552.22	693.176	434.169	565.616	470.859	602.713
ENST00000347512	282.647	465.047	524.048	552.193	491.37	441.971	589.166	670.983	621.39	699.376	429.455	529.8	469.718	583.305
ENST00000225430	271.503	370.971	377.077	439.528	414.676	388.817	549.508	700.015	670.758	781.778	454.671	501.925	441.723	437.21
ENST00000616182	264.887	2830.21	1315.34	569.644	1003.06	969.806	1048.38	890.192	1223.09	1258.96	531.938	872.76	781.501	720.948
ENST00000407193	262.229	499.232	474.746	494.398	430.887	421.108	576.898	532.372	488.413	540.679	420.694	447.828	385.718	480.117
ENST00000546990	260.115	0	0	16.7227	0	17.201	0	0	27.3129	12.6585	0	0	29.9172	0
ENST00000331380	258.679	2361.44	1048.97	461.924	764.498	742.242	617.365	492.233	794.809	1009.31	403.366	668.175	574.881	608.898
ENST00000613865	257.922	352.712	235.031	370.017	478.647	245.38	243.245	348.917	547.138	655.294	367.774	424.568	138.476	258.824
ENST00000448864	256.188	452.416	432.061	463.46	536.733	506.349	669.437	557.069	593.372	528.496	548.716	480.07	473.374	448.783
ENST00000451137	254.347	39.3043	38.9088	26.6624	22.3075	32.089	23.9288	41.4842	19.6412	27.5312	74.7493	58.116	46.3566	46.0666
ENST00000262030	252.036	192.48	235.187	257.159	271.367	267.817	323.295	270.497	225.864	293.714	307.511	252.577	192.556	169.166
ENST00000418115	250.697	219.432	229.526	245.844	240.981	211.717	235.786	244.779	206.327	220.782	182.665	181.98	187.869	170.829
ENST00000579260	246.814	256.01	268.932	269.175	341.088	298.945	406.76	224.644	279.227	262.372	294.333	282.794	315.408	255.198
ENST00000216146	245.911	324.686	339.64	428.587	413.893	358.861	470.131	380.827	285.561	335.154	286.385	433.373	351.369	469.443
ENST00000521309	244.906	152.336	1.76791	192.143	190.581	0.624203	170.239	174.165	113.747	148.41	185.933	144.144	160.311	124.526
ENST00000646539	244.764	106.104	54.9674	136.331	136.334	177.802	139.347	126.749	108.221	154.761	189.813	114.334	129.768	104.928
ENST00000369856	243.539	69.202	111.693	84.784	98.6834	90.1311	81.7725	114.809	54.3239	86.4463	66.6006	89.773	139.201	65.1816
ENST00000373970	239.09	517.566	261.977	200.603	213.049	183.383	168.962	229.042	208.976	374.823	396.65	393.469	219.624	200.234
ENST00000368811	237.784	260.855	242.142	296.811	251.736	300.996	305.866	308.93	184.226	280.804	255.825	351.128	242.915	259.479
ENST00000379412	235.437	226.741	244.582	259.645	412.411	345	283.107	249.02	179.313	211.868	210.708	290.56	223.027	293.511
ENST00000231061	234.606	321.006	208.626	212.022	279.855	263.041	209.552	235.261	201.852	315.418	173.301	203.353	325.252	215.921
ENST00000339647	233.032	191.563	237.034	190.718	218.749	201.42	272.24	210.144	135.917	155.862	256.829	170.189	207.524	150.445
ENST00000377727	232.198	3211.61	1362.64	476.027	792.047	1176.61	800.908	564.723	811.557	1117.79	497.274	609.094	504.905	474.156
ENST00000334828	230.745	228.638	247.446	260.241	286.706	265.547	315.539	337.552	309.852	335.91	255.394	262.079	224.346	235.108
ENST00000374550	230.322	467.768	393.153	397.44	623.729	538.126	665.602	594.049	533.148	599.792	1.84204	628.556	3.02562	442.127
ENST00000309579	227.931	433.011	424.732	454.232	390.973	366.846	459.734	450.275	411.497	370.779	276.711	343.531	301.941	367.363
ENST00000452673	227.914	154.855	23.9647	173.077	186.035	71.7198	67.4099	186.239	154.764	82.0812	65.8597	102.811	196.304	67.9387
ENST00000303910	227.676	2726.96	1346.87	512.254	764.236	1069.49	676.01	481.95	597.631	951.563	391.277	612.587	530.922	501.564
ENST00000370206	226.079	255.355	266.574	241.676	199.836	185.606	199.123	125.558	152.05	183.097	184.315	161.908	190.832	173.299
ENST00000362079	224.108	215.223	237.636	245.624	198.26	261.009	240.573	264.646	126.164	147.661	151.283	187.348	149.004	166.685
ENST00000304312	220.682	619.074	509.056	456.83	458.307	476.21	649.386	558.081	544.631	453.173	366.691	430.525	316.078	270.334
ENST00000316084	220.597	241.146	248.863	253.55	312.088	288.912	359.016	346.295	289.331	330.039	283.126	304.637	291.083	302.112
ENST00000245185	220.504	440.926	623.839	820.089	616.261	463.295	466.91	412.767	301.942	372.226	334.597	606.221	595.939	701.079
ENST00000372969	219.959	367.006	326.588	331.036	391.373	362.438	455.661	427.691	408.833	410.936	366.097	330.939	299.57	272.877
ENST00000258424	219.314	377.745	359.88	378.935	401.983	400.815	454.484	439.814	427.713	419.26	286.112	348.801	265.805	329.271
ENST00000374379	215.313	157.243	189.483	189.198	190.834	144.062	130.033	138.867	99.2317	110.225	111.969	117.865	145.561	124.166
ENST00000273550	209.835	94.2272	113.544	116.573	90.2241	106.857	122.736	154.556	79.1699	129.76	140.221	132.721	130.016	156.16
ENST00000375650	206.804	44.9131	63.1504	80.1101	146.074	94.2825	71.9519	82.9501	57.2483	84.4814	63.6915	63.8436	110.188	50.885
ENST00000547798	205.185	163.596	189.541	200.034	210.151	84.1483	179.917	66.7219	180.926	52.8672	195.263	194.392	196.5	160.809
ENST00000317881	203.43	222.853	236.535	225.149	238.977	221.218	302.749	293.292	208.751	266.967	195.478	173.379	171.191	147.758
ENST00000549338	201.405	191.989	77.114	199.517	185.058	164.013	220.2	221.035	81.6868	84.0067	58.4993	140.311	0	124.762
ENST00000396525	196.028	104.165	99.5479	133.445	110.814	115.898	115.387	130.935	95.6519	175.156	137.907	70.8624	101.178	41.9205
ENST00000380394	194.095	212.571	198.865	244.478	295.498	249.49	285.069	306.115	271.444	320.511	248.603	296.66	199.532	273.626
ENST00000345042	193.411	199.174	149.727	219.516	88.5936	208.23	160.383	92.8274	126.287	188.04	123.444	46.5901	238.381	155.277
ENST00000343262	191.386	355.286	273.515	265.67	325.68	326.702	419.204	569.727	317.465	436.903	323.581	308.187	267.769	333.837
ENST00000379143	191.359	179.08	95.0197	99.8829	192.66	170.958	277.771	302.757	300.298	290.046	167.491	183.035	180.592	177.719
ENST00000430157	190.435	345.716	346.784	382.769	413.617	359.157	462.12	451.333	445.405	457.544	363.015	395.927	296.192	361.78
ENST00000316448	188.911	211.354	204.106	203.507	231.615	286.577	321.274	265.615	211.102	221.979	238.696	286.883	319.727	249.096
ENST00000293842	188.536	374.931	349.938	365.869	453.352	361.202	461.827	455.661	457.89	496.079	376.433	407.547	334.435	371.447
ENST00000330899	188.428	168.345	175.106	217.963	292.665	222.607	205.313	193.446	177.37	271.907	244.383	229.756	234.516	144.871
ENST00000237530	187.67	123.909	157.003	136.44	145.13	128.772	140.763	141.773	115.505	119.998	106.084	144.815	175.344	161.391
ENST00000290541	184.143	195.252	199.844	206.978	216.249	189.263	270.142	282.62	258.94	266.636	229.598	175.646	181.928	153.234
ENST00000619426	182.047	223.566	260.987	241.41	264.005	274.966	280.934	279.407	268.625	308.004	222.753	210.612	231.191	209.91
ENST00000233893	179.31	161.039	176.079	188.472	185.9	159.415	187.566	158.063	126.625	135.293	132.384	146.877	156.866	131.93
ENST00000394077	179.03	325.101	315.197	383.65	396.884	299.457	411.583	446.362	381.231	422.921	339.543	367.919	312.327	356.111
ENST00000393820	178.213	241.096	125.007	276.061	339.356	243.115	281.312	115.781	190.198	238.422	115.685	129.577	257.084	189.977
ENST00000304786	177.55	185.07	89.8085	100.011	192.9	92.5135	113.955	86.978	105.095	106.35	87.2102	83.2233	77.3258	64.3162
ENST00000264258	176.879	302.252	251.673	255.4	227.235	339.592	320.48	359.161	327.706	331.646	228.226	257.02	268.698	438.826
ENST00000555572	176.733	191.84	198.468	188.682	228.806	184.462	250.067	240.863	233.398	203.286	179.075	191.157	183.174	136.679
ENST00000322030	174.049	101.002	128.348	120.254	152.902	123.223	118.427	133.772	126.871	142.607	124.326	88.1575	118.99	76.8124
ENST00000578186	171.008	0.384934	0.159499	828.949	0.866797	6.27807	0.128578	17.7303	11.9198	19.3965	0.120387	3.99102	19.7274	0.142398
ENST00000350669	170.692	179.552	152.067	176.044	237.493	202.808	246.841	234.004	224.606	207.787	169.928	217.476	220.968	223.651
ENST00000404933	170.039	214.564	223.795	238.497	254.835	210.809	220.03	200.101	140.531	122.129	137.517	209.016	212.159	212.052
ENST00000358739	164.238	1244.18	581.187	229.362	433.066	493.182	300.214	280.625	374.484	509.181	238.373	280.72	280.448	266.415
ENST00000311672	161.931	288.351	301.236	268.52	255.823	286.121	371.89	374.414	359.536	332.02	256.442	287.461	231.747	295.346
ENST00000294189	161.826	243.886	261.884	308.088	316.362	284.449	354.532	371.927	325.562	416.152	306.011	319.84	292.686	301.76
ENST00000296417	161.402	129.982	353.514	285.749	272.553	342.676	468.416	299.006	364.762	278.895	193.394	188.987	185.878	239.32
ENST00000225698	160.82	124.083	125.763	235.419	176.858	187.472	258.619	158.829	128.812	162.143	123.518	189.098	115.051	76.9448
ENST00000327435	160.802	111.019	132.308	127.915	141.066	94.0829	122.319	114.575	139.644	115.906	85.8155	69.6184	78.0499	45.2144
ENST00000325551	160.55	175.677	172.417	175.019	194.263	188	193.013	166.387	123.055	103.676	122.395	110.471	114.123	117.007
ENST00000238081	159.51	169.888	147.269	224.903	161.899	193.872	180.188	152.507	132.535	189.764	189.033	135.532	103.557	118.132
ENST00000613953	157.475	220.598	333.085	28.5403	36.6461	35.6918	46.8355	73.6396	68.1877	69.5094	69.5343	58.9732	55.7657	28.9953
ENST00000402752	156.46	180.129	185.801	193.276	268.268	194.586	260.749	259.905	252.933	246.445	190.372	218.117	200.802	138.752
ENST00000592588	155.954	168.235	196.912	208.892	252.194	206.277	249.213	273.675	224.769	283.687	195.59	218.659	234.034	232.455
ENST00000321358	155.585	79.143	106.204	97.2181	119.26	114.75	129.223	144.179	127.111	142.536	115.531	105.157	108.669	91.3353
ENST00000299767	154.603	60.8954	70.4007	82.1243	95.3278	104.268	84.3217	103.456	69.0898	71.3686	78.1436	114.398	126.633	111.911
ENST00000351986	154.381	138.458	6.1408	160.113	191.711	139.61	175.622	5.11838	191.244	174.994	7.14311	5.72794	136.063	117.394
ENST00000237500	152.01	185.539	204.384	209.585	199.37	172.373	197.476	208.026	173.705	172.355	161.734	164.688	133.617	146.016
ENST00000371443	150.984	171.491	178.302	174.856	187.08	153.206	234.206	230.405	216.467	223.947	176.736	161.828	142.874	122.713
ENST00000371437	147.546	379.872	336.94	346.365	291.2	319.523	388.311	363.964	361.083	284.229	217.985	235.021	211.49	270.03
ENST00000228825	146.987	204.169	207.236	227.837	236.672	218.62	229.312	212.965	183.463	181.073	176.314	183.81	180.749	172.749
ENST00000355857	146.912	276.588	248.094	284.66	352.457	323.658	362.601	339.709	329.791	325.899	217.886	259.336	210.841	223.931
ENST00000298510	145.502	150.546	157.572	161.359	154.327	134.913	160.828	146.557	135.801	135.658	132.598	118.769	124.106	109.872
ENST00000305885	145.124	83.1234	71.373	57.4029	82.553	76.6064	112.356	139.196	161.351	198.983	75.6171	83.7496	91.5417	56.4562
ENST00000295633	145.05	68.8838	109.245	112.696	103.195	114.205	80.4198	95.7433	82.267	87.3213	72.871	99.752	120.6	88.3461
ENST00000301178	144.312	54.1809	170.671	104.983	79.673	104.948	101.25	103.779	50.7579	68.5042	46.6986	62.2644	112.557	82.9659
ENST00000262584	143.991	48.2461	76.0064	61.8704	63.0494	64.4729	68.6519	82.51	44.4353	86.0271	87.7161	57.5719	110.433	59.6666
ENST00000360079	143.461	162.954	163.463	169.798	184.206	170.864	190.23	175.062	153.913	164.472	144.383	138.218	148.118	120.253
ENST00000649973	143.298	0	1.89883	0	37.3168	0	0	0	0	0	0	0	0	0
ENST00000251453	143.038	306.849	299.563	302.81	123.234	208.159	318.807	384.783	49.8396	441.728	238.83	274.811	219.483	250.612
ENST00000242577	142.952	227.796	254.563	254.732	200.763	247.508	303.209	203.764	210.804	266.501	129.41	137.943	201.052	122.981
ENST00000233468	142.921	210.39	208.952	228.75	261.303	212.298	260.447	254.28	241.804	240.012	171.708	225.095	196.735	197.451
ENST00000358901	142.913	64.295	84.7639	84.4198	114.717	86.813	88.1049	86.3357	74.1285	90.2906	97.4761	62.9768	107.552	58.2736
ENST00000318607	142.908	17.2692	25.2433	36.018	17.6687	16.9741	13.8978	41.873	23.6198	36.107	29.9607	26.9345	56.8669	15.0865
ENST00000409320	142.801	281.462	446.785	410.556	239.495	230.796	288.427	284.821	224.443	73.1075	199.739	155.92	532.266	250.808
ENST00000398136	141.9	98.5293	114.558	106.582	103.955	101.511	90.6255	100.021	79.2827	86.861	87.076	104.685	98.8614	109.818
ENST00000328848	140.898	252.442	243.519	261.246	271.339	242.549	313.701	315.191	315.811	338.487	228.852	284.003	209.164	219.194
ENST00000334701	140.732	203.639	242.128	239.54	132.874	271.883	298.029	169.992	50.4545	292.068	256.884	196.778	218.109	153.946
ENST00000225972	140.554	123.915	151.628	154.496	156.625	98.1403	125.165	147.296	124.701	175.362	142.627	108.891	123.244	74.1684
ENST00000558720	137.798	49.8845	73.2505	70.8686	47.4935	79.8612	79.7354	78.2675	79.7999	77.2631	71.0467	53.2085	59.1672	49.4833
ENST00000330459	136.757	104.432	284.431	302.487	172.843	179.748	114.02	135.082	142.554	228.63	236.084	124.504	187.226	117.752
ENST00000372728	136.756	172.484	176.461	174.003	205.089	189.632	239.691	228.628	188.649	183.543	202.877	221.829	157.493	170.761
ENST00000340385	136.161	160.326	172.446	180.239	178.516	152.717	188.167	194.388	169.273	181.109	166.632	163.515	144.562	141.216
ENST00000615868	135.676	1625.34	701.189	335.557	555.96	534.042	376.634	282.151	484.478	675.061	233.701	321.775	288.46	222.713
ENST00000278175	135.291	194.429	79.96	271.307	131.723	123.878	73.7341	229.504	287.82	241.954	150.042	71.3368	93.0692	46.828
ENST00000367495	134.586	165.392	177.97	163.261	140.684	158.937	175.403	147.835	136.822	149.381	130.304	116.912	120.46	119.823
ENST00000353245	133.858	99.228	206.429	118.079	83.2131	77.8436	70.363	65.7712	46.5488	61.6656	70.5598	63.9226	68.1934	61.7618
ENST00000368097	133.154	16.7303	33.8277	130.496	156.562	132.445	24.3759	47.9377	34.9013	48.028	16.5722	24.8918	157.243	33.9881
ENST00000551374	132.875	98.9124	88.5581	60.7499	84.5012	105.268	38.8846	54.0145	62.1748	89.9264	84.1505	72.2638	73.0466	68.7999
ENST00000345519	132.747	135.92	151.743	138.69	153.335	133.428	164.964	166.014	147.97	197.697	187.872	151.294	152.921	132.885
ENST00000598742	130.645	217.602	240.815	257.694	209.376	237.952	125.97	147.524	430.934	335.782	171.424	281.296	453.213	470.414
ENST00000412304	129.523	80.4282	90.7611	79.1005	44.4124	66.4985	56.8716	91.7367	68.8614	10.4773	10.0946	28.9516	78.4606	108.769
ENST00000325888	129.479	24.3987	37.1656	28.9	38.6079	24.5112	30.8945	44.6851	24.7649	41.8439	59.5454	24.8307	66.3162	14.1931
ENST00000375048	129.478	140.981	149.629	142.877	156.402	152.224	167.563	168.35	143.889	170.565	138.098	160.083	161.398	168.103
ENST00000331128	127.551	498.917	241.582	107.729	167.047	241.286	246.337	204.434	313.982	468.437	134.519	131.975	113.566	111.77
ENST00000224073	127.469	186.249	194.155	181.667	276.63	245.566	333.321	351.719	322.687	381.779	300.381	288.731	236.177	197.331
ENST00000580261	127.047	266.415	323.639	205.059	183.309	196.514	233.404	223.907	256.79	206.091	202.593	171.269	196.686	240.317
ENST00000357037	126.81	28.5619	54.2771	40.6051	54.9742	41.1133	35.5595	63.8092	46.8176	65.8889	71.7384	32.1319	70.6157	19.401
ENST00000271638	126.578	128.325	169.706	176.483	132.518	143.119	165.392	173.187	109.929	163.565	140.206	188.4	178.26	164.999
ENST00000370873	125.774	151.102	179.044	133.443	203.855	151.322	218.188	164.276	173.744	138.479	150.934	119.859	143.829	134.103
ENST00000330938	124.818	88.0953	113.884	123.538	149.368	125.546	110.045	114.576	94.5472	120.462	124.701	106.466	116.377	112.81
ENST00000296674	124.599	190.828	135.859	174.201	154.485	218.966	240.448	191.916	196.852	97.9037	160.699	194.487	167.586	147.157
ENST00000262947	124.182	125.41	135.419	152.444	175.213	135.768	188.746	196.339	165.012	200.985	159.29	176.666	152.301	138.299
ENST00000326739	124.073	87.4304	91.3054	81.8091	105.054	108.572	121.343	126.81	131.821	194.404	173.78	97.8346	101.326	83.5363
ENST00000203407	123.693	102.243	112.88	136.741	162.723	143.981	170.793	170.867	131.704	187.358	146.972	129.887	98.3938	98.0836
ENST00000339995	123.649	40.2704	44.112	40.3405	57.992	25.5157	45.4077	60.6456	56.042	46.8299	59.91	32.2334	50.2096	21.9036
ENST00000412585	123.11	128.578	143.852	142.516	146.064	163.45	162.322	185.372	209.009	248.88	296.309	379.009	503.984	534.665
ENST00000376925	123.067	133.036	148.603	149.284	173.693	159.067	180.253	180.573	149.155	151.286	165.775	172.952	216.627	192.081
ENST00000373586	122.326	108.623	115.46	115.037	150.027	123.559	176.813	176.303	152.241	149.481	141.622	121.098	111.673	95.4273
ENST00000272298	122.258	262.605	337.962	406.229	470.785	357.608	221.672	361.512	300.503	289.56	368.119	247.041	281.025	332.343
ENST00000593863	121.929	9.15525	5.88745	6.29226	87.4407	7.62298	26.542	28.716	6.55825	75.4782	62.1131	5.17766	7.50774	7.32967
ENST00000403564	121.171	164.412	183.894	201.522	170.001	131.027	196.868	169.614	168.018	130.218	121.441	138.219	197.742	146.679
ENST00000248553	121.143	126.094	136.562	161.314	166.61	179.988	173.087	160.784	88.8988	149.13	129.768	133.526	121.136	103.249
ENST00000380405	120.388	34.1383	39.7503	43.9485	76.5337	64.7891	58.0064	57.5471	45.6662	87.4143	97.8099	68.8386	62.8467	44.4372
ENST00000225964	120.104	15.3101	22.7917	17.3219	15.6771	17.495	14.7748	26.2052	9.21989	14.5625	22.3989	18.4981	56.63	13.7272
ENST00000263168	118.859	126.985	143.539	158.094	145.572	124.822	125.894	121.593	81.9552	112.817	135.904	127.203	119.365	102.573
ENST00000616365	118.378	1023.34	396.812	167.519	329.871	340.36	245.679	181.391	167.169	287.715	160.609	299.463	225.843	246.363
ENST00000521291	118.153	159.634	173.487	111.414	342.333	134.111	187.48	128.132	199.506	186.095	180.532	247.543	417.191	141.187
ENST00000302907	117.84	97.5491	113.159	133.026	124.156	107.341	133.245	145.392	131.308	154.874	109.302	148.783	101.867	143.916
ENST00000359303	117.335	2475.15	858.841	349.133	725.408	688.05	212.909	143.973	274.287	409.459	149.654	344.529	387.492	285.579
ENST00000308961	117.14	192.3	195.881	257.713	318.662	281.012	343.438	352.819	324.088	356.51	221.853	291.904	209.396	184.424
ENST00000569798	116.784	87.5509	102.167	100.845	101.633	130.873	108.059	146.657	135.395	96.3827	92.6694	90.688	108.555	127.76
ENST00000236957	116.386	99.5842	167.758	167.414	171.509	154.967	195.723	193.098	188.986	183.732	103.765	124.399	142.278	110.391
ENST00000359193	116.059	905.036	429.231	189.153	358.757	402.206	292.083	232.721	330.591	384.145	157.181	252.163	214.695	224.705
ENST00000361739	115.747	64.7239	70.0136	69.5444	48.4936	72.6719	89.6138	110.081	48.4116	83.3261	85.753	63.572	49.591	54.0404
ENST00000396070	115.651	226.793	197.319	202.366	181.76	222.623	293.977	314.31	275.781	270.141	201.388	210.806	138.721	260.233
ENST00000646449	115.519	229.351	188.534	265.815	182.54	210.941	252.057	260.987	277.367	310.639	145.287	218.2	136.909	189.377
ENST00000535788	115.469	245.213	255.934	228.772	244.61	235.268	139.082	202.572	188.546	168.282	201.336	210.218	213.483	204.397
ENST00000223641	115.459	175.591	168.361	182.152	175.994	144.322	213.813	218.969	179.975	181.013	135.688	148.472	132.825	117.92
ENST00000648006	114.741	155.69	167.433	161.445	8.16733	181.441	169.694	263.844	14.153	238.492	16.9557	15.2483	0	322.609
ENST00000360060	114.578	71.7302	81.0137	81.432	73.5413	80.0996	62.5064	62.0326	47.4466	49.8968	53.1655	83.3726	93.1737	90.5182
ENST00000305218	114.063	77.6464	69.534	99.0186	105.502	98.7571	116.117	79.9226	55.171	94.8561	100.714	105.231	111.746	53.8692
ENST00000262193	113.915	146.472	143.658	153.296	161.785	146.169	176.56	158.708	132.829	142.424	145.427	147.936	133.476	114.992
ENST00000301072	112.895	177.068	288	359.58	316.22	227.646	211.703	217.106	205.055	248.855	199.426	190.44	199.65	141.412
ENST00000378667	112.546	183.842	143.457	160.541	179.598	153.509	242.703	246.283	263.247	237.22	171.283	129.107	126.367	124.796
ENST00000613854	112.471	916.534	334.179	153.81	294.99	313.175	225.787	171.861	285.468	376.524	120.811	185.02	179.262	148.94
ENST00000304043	111.842	191.356	183.312	161.268	149.629	146.468	185.207	180.171	189.41	174.303	132.603	107.299	117.716	123.161
ENST00000331483	110.859	68.8665	13.975	12.3904	78.6818	72.9301	88.7465	22.3815	68.3201	81.9371	70.4632	14.6905	34.7052	100.731
ENST00000398606	110.789	142.327	122.606	118.783	99.8598	146.984	160.366	171.711	119.988	133.5	98.5134	91.5446	96.0018	104.702
ENST00000300026	110.607	64.0312	89.0015	81.7014	152.023	135.208	163.7	177.447	169.781	178.852	134.491	180.39	204.139	157.288
ENST00000309318	109.813	0.126394	0.028848	140.835	228.941	151.83	0.25115	0.140329	128.93	143.793	114.81	173.534	167.759	93.9148
ENST00000374078	109.786	247.576	234.745	218.562	143.384	169.302	207.419	197.946	195.301	162.819	131.837	140.719	133.727	184.542
ENST00000280326	109.503	72.9333	100.853	91.919	131.041	98.9132	81.8154	104.363	82.9265	109.903	116.83	94.5841	92.1199	52.1274
ENST00000319006	109.489	97.7718	102.965	114.9	121.769	105.498	128.288	124.92	100.208	115.819	80.1089	95.4899	91.8065	84.9736
ENST00000290299	108.662	146.457	143.53	143.817	152.379	149.722	182.402	157.789	130.997	133.884	103.105	120.195	104.275	107.141
ENST00000378720	107.124	111.225	114.827	111.307	109.556	104.397	124.99	108.757	80.1578	74.1544	69.4685	103.443	96.5542	100.39
ENST00000543146	106.484	102.126	111.814	128.456	92.0765	111.182	99.1454	91.4762	83.1744	92.6911	46.2543	89.9856	97.8911	70.4374
ENST00000359092	106.352	101.147	20.9494	40.1285	77.8864	41.1153	40.5084	48.9822	49.343	111.59	111.502	117.929	56.1273	29.2409
ENST00000296255	106.178	103.517	110.957	113.586	124.578	111.708	118.306	117.296	107.658	120.12	109.826	124.984	120.536	105.252
ENST00000254810	105.795	144.084	157.647	149.314	168.299	134.673	123.124	103.152	153.941	161.63	104.901	110.881	114.425	77.1051
ENST00000338825	105.393	108.118	109.979	110.617	121.925	124.518	150.029	144.261	124.472	144.519	102.48	167.685	119.967	106.875
ENST00000353555	104.877	123.646	71.3836	97.0062	109.548	115.044	108.92	152.647	87.1041	139.74	193.603	99.9971	147.647	103.85
ENST00000290158	104.816	44.0722	39.2226	43.2133	62.4065	38.9024	61.5317	50.9347	43.6129	66.034	59.6265	48.2134	55.4048	31.1691
ENST00000618958	104.251	870.836	347.648	186.557	360.319	380.543	181.999	155.676	307.848	326.418	114.219	238.41	200.743	225.172
ENST00000394668	103.887	166.849	155.477	131.041	150.883	167.903	113.149	127.327	112.599	119.684	128.352	168.599	163.939	146.543
ENST00000300738	103.666	72.7146	72.6282	61.666	66.6383	62.6818	62.8474	69.1362	72.1175	89.0669	41.5652	65.6489	78.2368	49.9753
ENST00000220849	103.577	115.726	65.9564	170.441	107.225	89.8063	21.0699	16.7705	7.99643	13.328	36.4027	24.1278	44.5753	30.585
ENST00000393467	103.438	100.094	140.87	136.941	130.119	99.1073	67.835	68.8133	52.9835	67.1675	72.6133	66.3829	66.4671	50.5044
ENST00000612661	103.411	109.612	126.228	148.205	175.991	162.536	105.731	92.2393	66.1494	108.181	100.145	112.571	119.663	109.678
ENST00000259457	103.297	139.355	145.226	148.115	139.723	113.858	160.753	137.012	100.326	101.344	109.26	132.803	117.919	96.3877
ENST00000313115	103.013	142.065	147.725	152.105	138.341	128.176	177.916	189.373	155.17	177.667	131.568	168.502	135.105	154.422
ENST00000270586	102.593	87.598	99.0219	96.6595	141.503	119.583	161.022	160.742	126.647	109.944	141.393	123.499	100.055	82.821
ENST00000532601	101.268	27.2197	14.9343	26.4303	55.5361	49.4629	65.3131	116.245	42.7771	174.635	67.748	65.2024	32.9407	23.4791
ENST00000527521	101.117	157.749	171.759	166.585	197.545	168.385	125.345	128.232	107.388	108.014	104.83	124.825	0.059596	129.275
ENST00000216181	100.562	18.6821	35.6191	25.7232	36.5889	30.508	25.083	34.0048	16.1871	23.889	32.3923	28.375	63.3276	26.9124
ENST00000644185	100.287	198.82	126.288	63.5442	72.54	145.549	59.0423	159.503	98.9775	60.1664	65.7772	121.381	171.893	179.808
ENST00000396394	100.203	106.94	106.932	127.406	110.151	96.985	120.402	104.54	77.2104	98.5633	105.234	104.35	96.5092	80.6918
ENST00000262942	99.5631	68.0021	77.9318	78.0805	84.1259	75.3512	95.7789	90.3137	58.7286	63.1595	63.1876	71.2065	75.769	58.1449
ENST00000374450	98.9993	111.074	141.623	141.58	140.953	123.042	134.869	147.207	157.817	180.549	154.532	128.268	115.888	93.5185
ENST00000512690	98.477	0	11.2944	0	5.82034	0	0	92.6495	4.12786	8.56914	6.23538	0	4.83323	3.42729
ENST00000621356	98.2133	122.84	129.014	135.574	134.172	113.196	148.633	165.058	178.624	174.209	150.66	147.418	109.969	86.9968
ENST00000372715	97.2103	100.287	104.929	96.0575	97.3259	104.365	132.936	127.917	111.926	132.159	106.258	92.5499	85.1637	71.8761
ENST00000370641	95.9908	73.8228	68.9091	68.0205	54.093	47.9759	81.0177	91.2772	56.6985	45.3486	58.1919	57.4726	63.66	24.5144
ENST00000649066	94.6375	83.1433	87.6184	0	106.388	107.937	74.7074	0	0	41.8386	51.8947	97.2977	87.5964	83.6555
ENST00000352433	94.3832	193.407	202.577	281.573	364.542	227.212	183.237	157.189	176.531	229.216	315.364	243.658	182.421	216.184
ENST00000314355	94.1811	165.402	300.488	449.906	232.274	274.864	120.736	129.784	182.514	261.761	293.537	195.578	186.357	174.559
ENST00000368259	94.0098	63.6077	144.033	4.04059	96.614	134.942	3.57327	4.11482	2.96064	3.05233	5.55416	2.09108	105.632	40.3727
ENST00000286788	93.9897	29.1312	52.4432	59.1294	132.852	68.7032	38.8132	63.8091	56.2512	71.6059	73.6527	40.8105	97.7122	88.2281
ENST00000588454	93.9652	76.3886	85.7101	63.5151	115.523	83.5992	56.548	98.1749	90.3457	80.0517	74.3973	127.282	121.275	106.173
ENST00000507591	93.3489	15.0946	74.7298	79.3832	87.4168	51.8759	64.4157	58.4706	12.1644	26.9842	56.1448	62.597	23.5952	51.1363
ENST00000265462	93.2865	113.659	111.687	112.961	174.09	164.954	188.21	185.985	168.352	175.737	159.523	207.321	159.085	183.772
ENST00000262056	93.1394	14.7772	70.1426	77.284	100.14	42.4033	62.0915	23.3284	73.4517	110.743	107.098	73.9759	76.7771	84.8096
ENST00000588991	92.8492	34.7423	0	4.53362	16.2701	3.90132	28.0446	80.349	0	81.0095	73.5483	16.8352	81.346	68.7356
ENST00000451270	92.2975	136.735	152.624	162.445	149.118	163.735	143.829	146.196	135.428	118.979	96.645	116.98	84.6017	101.077
ENST00000375651	91.6583	17.8032	29.1842	36.3179	66.2768	39.9866	29.7962	35.8172	23.2502	36.3734	28.1654	0.178292	47.9451	20.7828
ENST00000479035	91.359	115.863	107.68	120.544	150.525	167.332	155.314	147.627	118.463	131.597	125.389	146.941	151.034	171.768
ENST00000329251	91.1246	269.064	144.33	321.988	274.654	286.933	328.695	345.262	156.592	91.8887	332.222	134.687	519.845	188.558
ENST00000245206	91.0976	53.747	66.0069	70.2142	70.015	51.5507	68.2801	67.0533	42.8014	61.2588	72.8974	57.5437	63.2707	42.2147
ENST00000351839	90.9231	43.5278	56.6546	56.1915	66.8311	61.2996	50.6003	69.8637	43.19	54.1749	70.1222	54.8103	71.977	35.9397
ENST00000302182	90.3594	119.707	114.586	131.498	174.925	132.284	183.268	218.009	124.713	152.665	129.326	138.775	155.791	162.908
ENST00000394440	90.2407	75.9105	83.528	95.0321	102.832	86.7971	82.1952	77.4196	64.4063	78.9726	84.4832	75.7622	81.1069	66.2176
ENST00000602676	90.1187	67.18	128.412	128.046	128.246	131.741	178.037	171.958	122.601	120.756	104.688	83.3052	94.926	86.2018
ENST00000262982	89.9678	30.9972	45.9545	43.2519	45.3906	46.2875	40.2519	38.8556	28.1608	37.5341	59.2905	34.5102	45.2114	27.9982
ENST00000377733	89.7324	833.399	409.945	165.415	279.643	356.091	289.095	251.668	398.391	504.113	176.498	224.689	205.644	171.462
ENST00000217971	89.6678	62.379	74.2523	73.3971	80.5148	66.4205	79.8684	96.2359	90.3682	102.415	86.9419	61.3727	63.7574	51.2339
ENST00000295598	89.478	16.6797	30.5446	23.5866	24.6711	29.6383	25.2955	41.4272	15.9171	40.0064	51.4626	33.4957	49.0306	28.4888
ENST00000272227	89.1437	64.6057	65.0536	63.2994	61.1055	67.3455	69.7219	90.8544	66.8424	70.5941	59.2556	77.471	77.8334	80.8228
ENST00000614077	89.0622	6.46444	166.048	7.6182	198.445	6.91125	243.192	238.972	274.764	274.652	11.7778	212.893	175.109	10.4515
ENST00000301634	89.0121	69.6418	64.6135	64.6169	70.2942	79.2313	137.901	127.945	92.9793	126.946	83.9031	85.4113	78.2036	71.4795
ENST00000373316	88.623	89.3179	95.7611	101.126	115.897	118.185	103.498	102.008	92.8426	99.8776	87.0209	118.912	106.809	133.678
ENST00000340913	88.5834	21.9293	39.8563	31.5819	48.0203	35.6651	27.1028	32.9804	17.5088	27.407	60.0796	27.6413	40.5502	25.6012
ENST00000402285	88.4885	13.0955	141.857	157.415	109.222	11.3655	170.793	171.343	191.182	21.2593	172.258	105.1	141.99	81.4685
ENST00000272348	88.3298	209.928	173.459	208.224	236.934	168.296	257.593	189.208	225.82	189.501	146.952	204.321	165.553	157.352
ENST00000546591	88.2282	169.48	163.249	139.473	140.595	139.717	194.591	183.232	180.921	190.552	126.928	153.223	127.705	141.702
ENST00000381342	88.1993	143.788	136.003	141.122	189.077	179.144	177.073	128.387	122.596	120.996	107.93	159.279	159.074	110.192
ENST00000537328	87.9905	170.345	164.542	176.866	141.041	137.364	195.934	177.706	148.652	151.428	117.535	150.465	152.411	138.17
ENST00000371989	87.9612	35.6562	46.7861	56.6375	64.1591	42.0792	41.6606	55.493	38.7282	53.2194	54.8839	41.3681	56.9003	36.02
ENST00000534624	87.9432	192.915	50.9749	204.402	25.6421	71.1489	80.2672	82.8067	80.0125	24.5563	39.4289	43.8595	81.4507	164.04
ENST00000253024	87.7901	26.6071	37.3378	27.5627	37.0465	32.0978	30.488	45.1621	31.6001	54.1337	52.3767	27.8011	41.2116	19.324
ENST00000376327	87.7579	79.5561	89.3446	88.2049	80.0914	82.735	99.7922	100.668	76.3937	103.82	88.0502	78.1216	73.3383	57.4778
ENST00000275603	87.7046	89.7135	86.5689	108.936	127.621	102.816	95.7581	101.611	81.037	106.57	86.3204	99.0942	102.532	70.3276
ENST00000398603	87.6164	17.8214	96.3411	84.2908	105.144	19.5577	35.9642	22.7449	93.1636	118.462	96.9488	97.6014	81.5313	64.4191
ENST00000439561	87.2332	58.0447	63.3058	74.06	75.4741	65.355	57.6192	44.9255	32.9849	43.8771	65.9653	60.0902	69.4105	59.9105
ENST00000314191	87.2146	28.9889	42.1451	35.6366	38.8718	39.2182	39.0785	42.609	22.6617	34.2727	38.11	34.243	47.2814	30.2148
ENST00000296930	87.1393	89.1051	2.23823	110.85	114.572	74.2342	104.069	1.7583	56.0438	66.5809	1.26394	2.30893	105.39	85.252
ENST00000316292	86.8299	113.787	138.092	156.316	95.7648	120.145	78.6526	77.2689	69.0839	89.8956	89.5102	109.582	64.617	75.9783
ENST00000261313	86.3501	107.382	116.319	125.031	134.64	101.397	141.344	147.275	134.448	132.877	102.111	98.5259	100.169	80.6619
ENST00000252622	86.2503	137.629	123.739	127.339	120.864	119.607	156.597	156.937	118.256	118.882	91.3968	114.652	95.6522	109.489
ENST00000415949	86.1497	174.419	158.448	176.336	164.176	144.223	180.778	209.542	164.805	128.368	140.47	154.254	140.564	179.58
ENST00000296102	85.8652	153.954	138.876	150.776	168.251	147.929	200.286	197.375	173.33	166.271	106.248	126.229	100.365	127.183
ENST00000512805	85.8497	66.9769	62.3078	102.862	80.3899	98.1435	235.496	94.8183	90.9728	73.0232	109.992	61.1307	108.832	84.4572
ENST00000617569	85.6235	103.115	75.3606	22.0686	26.5326	44.8568	45.452	41.319	44.5657	50.1448	26.0602	21.8151	33.3646	19.2979
ENST00000388835	85.5069	136.402	144.524	161.112	186.223	133.829	130.791	125.994	98.133	147.381	182.8	133.412	118.073	122.383
ENST00000261497	85.1848	40.9956	19.25	56.2246	67.4547	55.7965	42.6086	46.5691	43.5311	77.285	9.37352	40.603	56.7797	32.801
ENST00000301587	84.9956	48.9723	60.6458	53.546	94.3993	91.2263	119.281	134.299	136.744	127.606	96.9615	86.1592	87.0922	72.8716
ENST00000491306	84.8316	229.804	307.635	518.849	472.928	336.193	382.68	1.39669	0.261632	436.48	2.22556	0.458767	300.788	149.02
ENST00000265748	84.7023	56.9177	88.4815	140.005	95.3398	86.533	51.0985	39.1389	29.1156	58.6453	86.7756	58.3611	80.639	58.0571
ENST00000392132	84.4269	47.2653	34.5831	26.0708	66.0191	50.473	61.9371	75.2515	51.5384	47.5203	47.2649	47.4097	54.0858	44.3151
ENST00000620216	84.2261	83.5729	90.8066	37.3685	112.533	89.8448	123.679	123.57	121.602	137.751	122.5	94.7842	97.2026	69.6264
ENST00000262033	83.9751	72.8807	76.3396	137.204	68.6789	64.4633	76.9595	121.64	71.2573	73.4095	60.1246	103.863	66.3681	94.5323
ENST00000278412	83.917	40.1495	52.2205	44.3625	57.8516	52.7245	61.2178	65.0114	47.8763	70.0412	70.2237	50.1053	56.6852	34.3964
ENST00000296511	83.8599	103.337	101.747	94.6579	106.127	88.5304	105.989	106.914	101.68	99.8971	42.9166	67.7138	88.796	100.703
ENST00000370089	83.7418	133.027	120.348	140.022	133.023	166.634	144.557	176.611	161.866	133.49	132.798	177.011	101.31	142.88
ENST00000360840	83.6567	26.9403	45.4209	34.1322	33.5407	42.544	45.6995	57.9987	45.6425	55.1381	60.1348	31.7661	36.6411	27.2754
ENST00000571691	83.4031	40.8956	28.8808	17.9302	20.7628	35.9958	63.4416	10.1891	54.5247	63.026	18.2944	72.0024	45.9882	60.178
ENST00000329967	83.3553	103.842	103.538	108.445	115.831	94.6907	143.224	158.247	158.599	167.13	69.8163	94.1543	88.1709	65.9433
ENST00000378670	83.0677	79.205	167.637	158.685	174.53	190.998	206.224	201.38	216.233	208.391	134.41	170.323	110.997	74.6272
ENST00000229281	83.0033	135.151	135.951	140.751	130.574	131.168	153.774	170.667	178.692	223.627	148.087	160.477	124.567	150.77
ENST00000265044	82.8972	87.3068	120.414	126.117	128.373	61.642	84.7588	98.5325	88.2769	96.7419	75.4898	117.291	111.364	88.421
ENST00000374980	82.8919	94.6735	92.7838	101.622	113.615	108.916	94.2273	75.0473	75.6719	104.334	110.619	115.728	102.32	88.6011
ENST00000175091	82.788	79.2082	84.3605	86.9587	84.4299	80.5305	77.1553	84.7883	68.1866	74.4465	72.3656	72.8927	80.8395	87.4666
ENST00000423485	82.6896	54.7528	113.351	147.192	85.1965	114.451	43.4242	46.0717	46.1031	98.5655	136.607	74.364	99.7218	71.7213
ENST00000246554	82.4748	138.601	121.494	129.219	122.859	136.031	155.571	141.571	136.366	134.218	104.738	120.819	91.2968	110.14
ENST00000311528	82.1848	91.7384	92.02	97.6247	99.5953	88.8951	114.371	116.494	117.487	129.233	101.33	88.1386	37.8169	78.12
ENST00000449470	82.0949	118.917	145.752	85.1615	140.447	138.607	271.359	181.305	99.2732	222.237	189.749	278.844	147.82	272.971
ENST00000528619	82.0721	23.176	17.0601	52.4992	27.3545	25.8912	25.6728	25.6311	18.9882	25.6406	26.4324	22.0924	18.0617	20.665
ENST00000264335	81.7535	69.4292	66.4824	68.5651	63.669	62.0219	66.3237	70.3918	42.1491	65.2912	58.1369	62.278	58.188	51.064
ENST00000399728	81.5897	77.9675	52.113	54.6688	191.294	68.4316	117.886	80.8487	68.1168	110.374	178.224	91.1726	47.5063	95.7982
ENST00000298852	80.8832	98.0149	72.9977	94.3188	107.418	90.6044	133.988	127.161	119.88	141.972	111.767	88.5317	94.4467	61.7115
ENST00000356455	80.8595	88.4143	193.466	216.904	122.631	205.21	125.481	138.796	151.268	239.078	257.849	175.29	182.622	132.243
ENST00000380749	80.363	64.2444	43.7414	90.4913	85.3934	130.218	112.036	95.6911	73.332	92.744	80.3364	68.5838	87.1147	59.4519
ENST00000007516	80.2241	95.5406	109.107	138.995	148.473	128.905	152.465	133.763	125.693	114.965	106.622	114.868	113.536	100.647
ENST00000357156	80.1089	93.3938	96.3291	96.019	79.3139	93.0914	118.419	114.435	82.1412	101.483	101.058	102.931	85.0433	97.609
ENST00000524553	80.0057	70.9922	232.975	234.198	132.719	170.194	131.983	405.114	61.5678	386.406	284.427	41.8329	60.132	31.1225
ENST00000439590	79.5921	226.397	187.602	218.382	167.715	138.718	216.599	210.859	207.453	249.152	158.87	193.467	124.258	165.125
ENST00000314888	79.4852	22.2042	30.4098	26.7285	27.8685	30.1777	24.7186	27.3753	14.125	27.5426	36.3456	35.6894	48.659	31.4443
ENST00000260118	79.33	83.6132	90.2902	83.7267	83.8797	78.8436	94.9599	105.374	95.9823	99.5983	71.667	90.0922	95.4917	126.286
ENST00000423525	79.1361	28.1871	38.7417	40.7206	76.5484	44.9404	69.532	41.0647	47.9484	62.1893	45.6842	53.2948	34.927	24.5852
ENST00000323274	78.8907	12.1183	11.6535	9.85833	8.43137	13.2861	19.5627	21.2728	13.5819	19.3752	15.6575	17.2823	30.9364	16.3827
ENST00000505490	78.6543	26.2532	30.6435	23.135	44.586	32.4644	21.4945	23.6362	21.3867	29.0621	44.307	29.5673	40.2974	14.4306
ENST00000360718	78.4582	65.6531	61.764	50.0924	74.3995	69.0043	49.912	78.7752	78.4545	128.55	148.155	82.6852	91.7881	75.1948
ENST00000404735	78.0852	217.744	113.14	121.089	102.818	163.567	111.561	120.375	103.86	206.485	87.9533	80.4443	78.331	88.7798
ENST00000287394	77.3819	24.6789	27.2247	19.3823	40.6013	34.5189	40.5716	38.2062	40.588	48.5214	41.6989	33.5716	35.4259	31.026
ENST00000396033	77.3501	21.8099	21.3272	31.9198	27.5056	30.5584	11.3342	19.2801	16.9898	15.8411	26.6093	10.7638	35.2267	24.8763
ENST00000355938	77.308	93.2561	100.838	99.9313	102.264	95.6658	131.967	143.059	117.732	114.411	65.6415	99.0854	90.3965	82.6024
ENST00000318911	76.7141	65.6892	75.2393	64.1646	80.8577	76.5931	97.9045	95.4572	83.2137	88.4293	89.4326	71.4758	70.7643	57.7911
ENST00000530758	76.1215	57.1528	62.5324	57.8578	59.3403	58.5094	81.9152	97.506	89.2834	95.8766	74.4768	61.2834	59.6324	55.785
ENST00000252804	76.0801	15.7086	28.4879	25.1708	34.0776	38.3427	27.0736	33.4023	18.1451	24.7883	27.763	33.7436	54.538	37.8109
ENST00000307961	76.0715	187.768	189.825	93.7914	183.241	218.883	133.961	81.3698	169.329	107.852	102.75	89.3071	79.1141	109.153
ENST00000375499	75.9156	83.7683	87.0076	90.4271	96.1809	78.553	96.4277	83.4113	64.7784	64.3518	82.1945	83.9357	70.301	62.1208
ENST00000472765	75.8467	45.4527	26.962	65.8739	99.8125	77.6834	56.8213	61.0691	43.3561	59.4316	70.6088	62.4144	70.1314	34.428
ENST00000248342	75.5724	109.727	108.168	116.251	115.958	101.792	125.435	110.345	92.6958	82.7072	74.0845	81.0149	90.7193	86.1254
ENST00000260356	75.5312	61.4293	76.8255	41.5954	27.786	22.6702	22.3682	37.8742	23.4955	29.7029	45.2937	24.6476	41.8104	24.3808
ENST00000394936	75.5091	37.1392	46.4295	41.1097	55.9105	61.7821	59.0366	65.9058	51.5871	72.3808	80.0441	77.4849	86.1282	88.9832
ENST00000651894	74.8774	131.624	137.751	147.218	183.569	126.911	167.745	153.525	137.558	125.297	124.359	147.269	101.496	101.42
ENST00000217456	74.5253	60.1709	69.0304	64.67	80.6387	78.3301	83.4348	87.2189	78.3752	98.1525	70.9509	73.5436	82.1432	71.8474
ENST00000328257	74.4671	26.5835	26.7982	25.5688	40.5328	33.9309	50.9044	42.0669	22.0822	29.2529	51.7193	61.0653	30.2393	20.9576
ENST00000217026	74.4489	62.9641	60.0858	56.7453	61.0873	62.0456	82.9918	66.8515	38.0668	59.384	51.4574	63.2806	60.9133	43.2368
ENST00000521425	74.4315	34.2276	44.854	46.3729	21.4529	29.4108	24.0782	21.1083	20.9189	20.3073	29.2826	22.411	37.8007	23.3665
ENST00000372731	74.3001	22.493	31.6468	24.8749	28.4578	30.7174	29.3068	30.2706	17.4789	34.3013	50.713	26.7635	31.9744	22.2909
ENST00000196061	74.1844	21.6345	33.2141	29.6031	42.3607	45.2793	40.0501	47.0024	31.7407	45.2218	46.1464	58.6517	70.5044	62.3945
ENST00000370355	74.0806	29.0632	39.7611	44.2567	47.4852	50.2193	31.0552	39.8983	25.545	35.8802	29.8646	24.5542	27.2911	24.4884
ENST00000193403	74.0591	34.5852	49.8056	46.2611	22.399	28.8485	33.9055	22.8429	9.86574	14.6733	24.7542	43.9715	57.6534	33.9172
ENST00000581373	73.5804	57.2198	55.1103	48.3209	66.0093	34.7496	41.1325	89.1139	81.5039	36.2395	34.7837	68.4334	47.3924	91.8762
ENST00000343813	73.5699	52.1408	51.173	46.1399	50.5778	50.4891	70.1814	80.146	77.4264	84.2477	17.9457	47.3472	52.8433	22.108
ENST00000439647	73.5135	24.4179	10.2338	9.12944	31.8274	36.0676	5.53662	4.44329	7.50984	5.32284	26.8451	4.38708	41.0914	22.6328
ENST00000264639	72.8175	90.7215	91.938	100.092	106.627	79.1818	110.478	98.5768	79.6588	115.371	121.914	82.3656	86.1562	59.6024
ENST00000358435	72.7373	139.214	133.211	139.669	131.237	135.526	169.079	154.054	145.788	132.132	104.797	138.447	124.153	155.476
ENST00000355899	72.5076	63.3576	69.2536	70.5297	84.3002	72.3574	65.9857	60.802	49.5793	50.1026	18.3354	79.2364	72.4214	14.9254
ENST00000432588	72.3912	0	0	0	0	0	0	198.374	0	0	0.004266	0.000988	0	0
ENST00000367651	72.3204	108.936	79.0657	61.564	62.5638	100.948	68.7306	75.8129	39.3275	56.4445	88.657	89.123	85.0835	86.1044
ENST00000322157	72.0518	25.5758	27.7536	28.0003	26.3529	24.1296	19.2672	24.878	12.8076	24.2573	41.4374	20.9817	31.0027	16.8555
ENST00000306107	71.9812	26.5865	44.3868	42.6993	39.6467	36.221	25.715	30.0428	16.9889	14.0797	20.1229	23.0704	32.3566	25.354
ENST00000361891	71.914	75.6666	96.7267	103.405	126.455	90.1426	76.0231	97.3128	91.6818	101.3	81.4119	78.2653	79.3716	69.4525
ENST00000379341	71.839	73.9363	91.1169	78.3784	95.9589	82.1836	69.5103	86.3141	127.376	87.7374	72.7909	99.5559	101.468	116.996
ENST00000331491	71.8173	977.513	394.448	190.458	277.788	367.153	187.384	189.213	428.055	435.352	162.167	221.744	144.644	242.418
ENST00000304567	71.6775	120.225	3.76373	82.8939	71.5902	36.1111	75.3756	81.8674	7.06015	4.10867	30.3953	67.3888	38.2836	29.9982
ENST00000221801	71.3299	33.6004	46.2692	34.9367	45.167	19.0636	42.9025	55.4012	31.8877	52.2738	49.3849	39.0949	24.9164	27.4638
ENST00000304858	71.0215	33.9199	46.1215	49.1146	69.2959	52.6236	44.0172	39.464	32.8701	52.1555	62.3834	45.0288	52.3025	33.0914
ENST00000225603	70.9775	32.4707	44.3285	47.1746	55.7591	42.8269	38.6154	43.0054	32.4673	55.7601	56.1135	51.2969	58.8487	39.6717
ENST00000361427	70.6918	159.777	137.995	160.24	223.722	189.532	244.439	229.247	195.18	227.194	130.749	128.596	126.163	94.2171
ENST00000366794	70.4268	20.708	30.8262	23.8074	26.9952	26.177	25.53	32.9666	20.2096	30.4025	35.7339	21.6184	37.2953	17.5075
ENST00000244496	70.3046	61.4778	45.7871	77.3076	82.5366	59.9242	40.105	55.8047	68.926	94.6675	78.9181	60.0888	40.5778	36.4475
ENST00000388968	70.2168	1.95646	83.8555	1.04757	257.131	28.3031	156.269	160.013	76.46	5.90327	91.0958	211.369	1.45457	15.5666
ENST00000393099	70.1665	60.0714	72.618	74.6993	94.9142	75.9084	92.311	101.114	96.5652	100.613	85.599	82.6105	197.815	73.2181
ENST00000451301	69.9816	1.68384	9.57759	2.51094	3.56187	3.56489	2.53528	4.47771	2.4054	6.92417	3.24726	5.96218	2.24939	7.62924
ENST00000565420	69.8884	8.38983	6.84238	67.6252	7.69239	153.656	9.83471	7.11378	6.71167	56.9837	48.5417	79.0785	74.909	9.53889
ENST00000367976	69.7988	31.6667	18.2763	7.41558	5.86217	14.3184	54.4912	38.9472	13.6659	17.8598	29.987	49.0085	34.3137	50.2637
ENST00000258739	69.7296	55.3	49.4939	48.9624	53.8695	48.1985	53.2281	62.085	44.9422	54.7476	45.7387	56.2062	56.5916	47.4691
ENST00000370982	69.6758	46.2838	58.6511	57.564	54.9274	50.6768	45.4413	40.8129	23.0526	24.2272	47.635	49.5085	47.9152	39.1451
ENST00000611653	69.1298	89.9988	99.0289	101.419	84.0358	92.8944	96.9707	99.6782	101.924	115.472	72.9462	99.3115	75.2304	67.9468
ENST00000252599	69.1232	25.1923	35.3551	31.3762	31.9574	31.8769	29.25	37.7101	26.6469	40.5942	32.4405	33.693	53.2367	31.9424
ENST00000373232	68.9978	71.0141	74.6434	74.5862	83.2352	63.1038	86.1293	77.2769	66.2131	71.9592	78.4779	72.2734	69.8631	60.5438
ENST00000379666	68.9813	179.93	127.461	109.698	95.5164	129.77	170.672	144.829	136.505	112.205	88.2537	105.341	57.1051	100.292
ENST00000532820	68.9019	40.2407	54.7717	58.9502	60.0931	46.3383	41.7259	39.0042	31.9462	54.9258	60.5803	38.6908	48.7261	30.8518
ENST00000262812	68.7907	75.91	81.3233	81.1637	87.6295	73.7294	103.197	105.651	80.4624	85.611	60.2482	79.5359	83.39	77.1206
ENST00000428879	68.6952	77.5381	35.0357	33.2593	59.5553	32.7296	34.595	52.4767	25.6279	85.3935	38.6166	52.8293	58.2072	40.6708
ENST00000338639	68.6317	58.0089	70.4145	65.7739	76.1141	88.8534	94.0918	90.2662	71.1625	73.6662	68.6612	82.9283	64.269	61.3736
ENST00000409115	68.3765	74.9717	96.5963	55.6909	86.5922	88.6375	160.463	67.0685	79.3545	79.4423	44.9505	63.5189	99.9901	90.8898
ENST00000367075	68.3137	20.5003	35.3459	31.3977	36.8776	33.8701	28.3298	30.1114	20.2931	33.9103	42.4195	29.7453	37.3214	20.6581
ENST00000037243	68.2191	61.9861	48.1262	59.1931	61.7168	44.6837	44.9713	55.5962	34.4836	49.0319	46.1764	56.3507	33.2732	34.2833
ENST00000257770	68.0514	44.4074	66.8414	65.5795	53.9161	34.2952	48.2935	56.528	39.0539	37.3125	43.2311	86.879	107.479	99.044
ENST00000247866	68.0405	130.871	192.656	112.104	0.020503	185.507	226.385	3.49784	29.8605	216.927	145.59	98.2998	0.022261	82.3429
ENST00000217652	67.7719	66.6211	79.5186	74.6492	83.0619	89.0717	100.695	115.999	94.008	77.7721	70.6068	98.0071	77.8408	90.1178
ENST00000300408	67.5597	69.6555	98.535	97.5564	118.928	94.2227	122.097	116.313	118.327	118.598	102.712	90.938	85.9294	77.0231
ENST00000244534	67.3881	1281.4	388.465	142.998	299.077	431.069	130.32	83.1781	148.83	236.678	93.5652	210.142	243.073	278.314
ENST00000300291	67.366	62.1058	58.8115	59.1168	60.4367	54.4044	56.0667	56.1902	53.2465	70.6411	51.1363	46.5936	49.6528	41.9039
ENST00000648273	67.0413	10.9286	20.3713	16.5246	15.666	18.2519	16.8772	25.1816	13.1354	21.8425	25.5707	17.2502	29.836	13.2891
ENST00000578532	66.9876	82.4367	87.5757	104.286	130.335	102.471	148.347	133.165	92.7741	95.6336	99.0028	92.5753	76.5581	70.5666
ENST00000350997	66.7918	30.1928	34.0673	33.914	45.4225	53.1089	47.8887	42.1574	35.063	44.9612	42.2166	36.177	43.5627	38.8745
ENST00000253039	66.6969	66.0035	69.5241	68.167	78.1849	73.7113	70.0815	65.7945	54.0891	69.7686	58.7678	76.3019	71.4988	66.9517
ENST00000393085	66.3685	52.3459	57.4634	61.5478	51.831	43.2089	46.0966	50.5627	36.7352	46.7973	47.4263	37.0849	43.5131	38.9453
ENST00000541790	66.1179	957.312	392.599	162.067	148.543	258.537	201.423	144.592	229.985	262.143	122.563	207.4	178.294	169.103
ENST00000374293	65.9469	78.9478	83.2354	85.8113	76.637	67.898	74.732	66.3315	55.321	51.8742	55.4239	63.9868	58.0856	52.0675
ENST00000231572	65.8708	52.4176	63.8956	72.8647	92.453	62.2669	59.4734	41.6705	48.1039	80.0643	64.7477	52.7924	61.4291	43.312
ENST00000263382	65.8069	42.4696	38.1515	33.1095	41.1624	42.8681	72.6665	99.2015	98.1784	105.288	49.4065	56.1322	57.8881	48.3106
ENST00000369163	65.5983	952.028	405.606	143.188	255.291	337.552	149.853	114.752	186.31	250.602	103.766	199.839	221.18	209.952
ENST00000395047	65.5702	81.3188	86.4852	94.9943	112.623	76.5799	102.051	95.1539	81.7342	80.2524	77.8091	94.4842	84.7515	79.0545
ENST00000367569	65.5358	79.1717	88.4	83.421	103.864	96.3243	123.261	120.683	113.571	117.036	93.3614	79.3833	72.5592	75.2169
ENST00000380842	65.3676	62.5962	68.2446	67.0312	76.9011	58.6579	77.7322	72.2491	61.0634	61.4858	78.9758	75.6322	73.3195	56.453
ENST00000499869	65.2639	23.9688	41.2515	32.6998	28.5685	30.4832	25.2994	12.608	18.3869	21.8126	28.2287	31.7596	40.4846	8.78055
ENST00000323345	65.2369	67.8718	99.0126	128.49	209.34	61.479	728.714	205.363	61.674	47.9211	45.178	193.562	77.1536	231.991
ENST00000469257	65.2306	17.6572	22.4002	22.9076	11.6942	18.1046	25.7478	32.7551	16.3766	33.6085	30.9261	25.8578	29.8046	12.8689
ENST00000304414	65.2055	54.7396	146.97	216	165.774	152.751	54.8764	61.7866	65.1649	116.337	155.446	74.2135	100.042	67.4191
ENST00000337288	65.1701	25.363	34.8561	35.2927	42.4556	35.5786	34.2494	42.6868	43.757	60.8895	47.6369	32.8032	43.5716	23.7149
ENST00000643754	65.0247	92.485	96.98	96.6041	140.041	88.6843	106.173	90.4687	109.557	120.056	257.215	132.512	273.659	129.291
ENST00000378292	64.9316	55.7944	52.1804	51.3973	102.665	88.1125	105.082	131.249	112.314	118.446	78.3692	108.472	113.217	94.2517
ENST00000344795	64.817	62.2663	66.8898	58.3202	62.4779	54.806	75.3479	34.4377	39.6313	107.293	46.7582	61.9974	54.0051	43.0319
ENST00000312037	64.7641	159.047	124.051	302.003	131.064	90.0002	159.542	255.367	139.812	242.136	160.154	134.29	236.9	96.5717
ENST00000260102	64.7285	85.0171	102.769	102.517	91.9089	73.3717	78.054	76.5733	84.8584	110.306	94.3498	86.3485	84.9421	49.1043
ENST00000230085	64.6743	62.1075	65.4948	70.4936	70.6397	70.4705	33.051	66.6203	48.1244	51.9813	55.6182	64.73	57.7995	55.5854
ENST00000318388	64.6094	71.7141	70.7551	73.9974	71.2406	70.8595	72.2152	61.0451	48.804	60.7049	59.3518	72.3388	61.2657	56.4565
ENST00000303127	64.5422	37.0046	40.2126	53.7687	54.0639	47.9462	62.7433	62.074	34.961	59.5788	51.5133	58.1635	49.3393	40.8912
ENST00000409682	64.5099	76.7782	77.7857	85.8422	92.5494	74.9465	81.7638	58.2925	43.6566	49.7601	70.9097	77.1525	86.8803	59.707
ENST00000372134	64.4696	53.5622	59.1718	59.4669	72.0518	58.4611	70.9843	69.2862	62.7	71.6458	73.4909	59.7878	57.1076	43.2285
ENST00000647131	64.3435	61.6279	62.6934	55.6549	76.3245	79.1346	79.2776	70.8478	70.8368	75.8507	56.8397	68.465	32.2149	42.1943
ENST00000339812	64.3085	905.177	331.242	132.712	224.98	224.826	203.048	132.241	211.507	232.078	117.581	203.673	199.528	170.267
ENST00000297290	64.306	55.6005	69.5088	76.8067	64.3815	62.5469	60.0116	61.4443	35.109	61.0943	59.9098	80.7221	64.5884	65.5061
ENST00000550566	64.2958	1.22653	1.11166	1.08574	1.90374	1.24593	2.2689	2.12334	2.35042	1.7255	1.51906	1.79592	1.71046	1.23982
ENST00000392168	64.0988	76.7779	87.9306	80.7014	84.0653	68.9346	76.9657	73.3775	68.1122	100.87	72.6747	104.571	76.5211	50.2323
ENST00000530167	63.6124	77.3061	88.1253	89.681	65.9586	86.2124	88.847	105.319	88.0209	150.649	49.8193	53.1463	53.3592	38.0303
ENST00000279022	63.4117	43.0587	41.702	38.7884	28.5683	33.3127	46.2334	52.0568	19.0725	45.2834	28.0675	44.1095	51.4661	35.5016
ENST00000301788	63.1943	69.7516	78.6568	66.2561	78.5927	84.4581	91.5676	90.3968	82.2747	89.085	77.9229	75.0352	75.5694	71.6498
ENST00000615966	63.1917	1613.66	701.807	237.129	416.868	511.346	269.457	185.856	324.627	371.372	158.45	278.029	274.91	173.484
ENST00000361575	63.1721	364.011	163.011	61.7771	162.353	35.8979	131.379	63.0999	822.487	642.114	103.602	636.578	185.22	332.096
ENST00000614911	63.1175	493.33	238.162	123.894	191.593	232.521	138.094	109.687	129.358	162.436	91.3703	126.62	114.323	116.164
ENST00000324460	62.9657	12.2218	17.2819	19.5819	14.6764	15.2222	15.635	21.6427	8.00035	22.425	27.2464	29.3684	37.6377	19.3031
ENST00000264552	62.9152	66.3549	117.734	168.276	140.155	136.42	97.4611	99.1673	86.9718	142.824	155.119	127.095	97.9044	82.4772
ENST00000270142	62.7962	47.0394	65.0465	45.4582	99.85	78.1642	128.559	123.278	124.022	119.962	103.357	105.104	99.061	95.8994
ENST00000550487	62.7338	107.198	94.8919	98.711	102.116	107.668	124.541	115.153	114.801	105.962	106.514	113.736	79.0198	104.476
ENST00000274787	62.5239	60.4405	60.9711	59.3617	61.8398	61.5972	83.3366	77.442	48.4016	70.8449	56.4819	53.5177	43.4535	44.8714
ENST00000525876	62.3976	6.62796	90.4977	15.3018	1.65514	10.134	0.365015	5.84857	94.5872	131.631	121.715	156.359	148.421	77.0789
ENST00000574872	62.3553	43.305	80.2896	58.9771	49.4016	61.4501	41.8987	77.2081	42.6284	62.256	54.3468	37.6221	56.8407	43.7078
ENST00000326199	62.273	152.156	135.281	118.776	171.484	190.398	199.389	191.498	288.316	240.168	185.524	180.705	118.121	154.882
ENST00000227266	62.1973	39.652	51.3032	68.0037	48.5162	35.8851	45.1751	47.1297	39.89	39.4096	35.2412	44.117	51.2654	40.93
ENST00000373912	62.1688	54.2878	58.0592	65.1893	78.9901	62.5949	87.2072	76.503	89.144	112.637	76.3189	73.6008	72.1627	52.2648
ENST00000504898	62.1674	15.9682	24.7984	20.1947	25.6893	21.1726	28.8131	36.3268	27.9064	42.1228	36.4628	25.582	31.949	15.5042
ENST00000216455	62.0616	61.9956	57.6842	62.1605	57.1372	53.92	63.5578	57.5856	43.415	58.1519	72.8454	53.5342	61.9594	46.0438
ENST00000368299	61.9333	0	54.9619	0	0	0	57.5346	50.9274	53.9748	62.0257	75.2307	0	0	22.9073
ENST00000337970	61.615	16.4317	29.711	23.1174	19.4907	21.6563	11.9721	21.6761	23.8135	37.4862	30.8586	14.4029	25.5028	12.3562
ENST00000367142	61.5123	32.1627	6.45459	6.95692	42.2563	40.1215	33.5426	30.7348	20.0548	23.5248	32.5951	28.0012	39.8903	4.85717
ENST00000376957	61.3854	22.781	31.9593	30.8464	25.0114	18.0521	28.9556	41.4312	20.96	39.5773	34.7177	28.6852	42.2115	16.8189
ENST00000618395	61.3741	22.7913	28.0571	26.6362	38.0323	41.5506	25.1111	25.5217	11.5839	15.2239	18.5882	30.1466	56.0077	27.246
ENST00000272542	61.3563	70.6221	57.8769	31.2228	26.4913	33.5439	42.5081	56.893	49.0262	55.6599	47.1517	49.1274	43.6989	41.4822
ENST00000303305	61.289	54.0612	63.9428	52.4385	72.0344	41.3833	54.9797	73.6733	61.8364	76.6717	50.3569	53.6603	47.3822	37.7692
ENST00000297338	61.204	30.9796	41.9544	52.1453	38.8405	38.2517	25.9819	28.653	29.7732	56.462	53.2966	31.0543	41.5818	30.9178
ENST00000379719	60.8635	25.3362	34.2681	30.6041	30.8634	26.0321	22.8788	22.0069	23.327	38.9867	42.8769	33.2094	35.6906	28.3463
ENST00000290349	60.6904	64.3682	74.1431	71.4238	78.8879	71.1118	41.2893	82.5028	93.2552	120.103	34.8146	81.8221	67.6083	55.0121
ENST00000409650	60.6833	82.2279	63.5069	111.636	231.592	3.90474	237.846	155.032	249.218	216.204	181.981	262.367	2.93154	92.4706
ENST00000378119	60.6544	22.678	34.4088	29.4814	27.6831	34.1153	24.2212	22.6455	20.8252	39.9969	41.5234	32.2745	38.4484	22.5514
ENST00000313601	60.3872	25.7652	34.9087	32.839	60.0965	53.5048	51.9035	26.7732	45.4808	52.4637	23.7928	45.1942	19.7776	25.4628
ENST00000237654	60.3655	18.9882	22.0203	22.7646	19.5949	20.0484	22.0266	26.8653	17.1198	21.1689	29.8741	19.6377	23.5967	17.5751
ENST00000254322	60.3278	35.1311	51.8561	78.9876	74.9079	59.8199	48.4595	46.8077	51.7233	84.6876	48.0342	64.204	46.6737	45.0477
ENST00000380191	60.3073	61.4139	37.9975	66.2779	47.962	62.2181	67.9971	56.1595	46.3051	38.1053	39.0938	53.5767	73.4758	50.5335
ENST00000403683	60.2474	286.158	148.126	63.7192	72.4638	111.472	93.9277	97.2029	121.742	153.171	65.0878	78.7513	74.5905	69.9734
ENST00000295006	60.2376	13.5808	30.1302	5.94197	23.2259	22.7357	9.6287	28.3828	16.1989	18.3431	28.1278	20.3945	34.9101	15.7806
ENST00000233114	60.2021	49.0783	9.03681	43.4457	26.9306	64.2879	57.105	5.61034	42.6751	12.8056	42.0324	19.0987	12.8084	26.4477
ENST00000582746	60.1638	60.3709	2.68059	2.18006	72.6223	52.0964	11.6174	53.5515	65.0524	72.2492	1.63205	55.585	61.5061	43.6713
ENST00000373365	60.1085	37.9499	44.7541	43.1212	43.8144	39.7993	46.2558	49.9742	43.8549	44.2612	41.9116	41.8265	47.44	40.1574
ENST00000219252	60.0299	76.0023	67.6548	69.5439	62.265	52.3467	84.9026	90.2377	71.0508	93.6349	78.2506	50.7806	56.5076	37.9334
ENST00000404022	60.022	23.9447	32.7871	29.1982	28.539	41.2643	31.288	37.3041	23.3117	35.9749	32.7659	23.4943	28.4185	21.5643
ENST00000333151	59.8405	549.614	301.975	95.6283	175.296	266.418	133.431	109.029	148.003	210.595	83.8188	123.885	152.944	109.772
ENST00000333676	59.6113	55.8002	67.2245	80.0376	55.7635	48.9537	61.593	64.0038	30.6586	84.854	64.7293	66.513	63.3439	43.1484
ENST00000399138	59.4556	42.089	50.2627	58.6255	61.9566	56.0682	52.4902	57.2816	57.0983	89.4884	59.7765	64.365	62.0448	47.8566
ENST00000579408	59.4295	10.5172	10.2618	140.995	22.4937	5.66279	8.18342	10.0876	8.18072	12.1366	21.771	11.1295	115.581	17.5254
ENST00000379060	59.3749	10.584	20.3265	18.8487	39.3502	23.6266	37.3938	23.5051	8.50103	15.3961	28.4972	19.8519	22.8464	18.3486
ENST00000258091	59.3422	15.5478	20.9836	23.2717	22.9151	19.6501	14.8196	25.4672	12.4658	18.4826	31.469	14.1615	26.2914	12.0503
ENST00000230056	59.2368	31.0187	45.9561	53.526	66.4963	37.5311	47.2084	39.2558	55.1521	89.3662	38.6848	40.6955	34.2047	30.2898
ENST00000157812	59.1197	45.0227	57.1205	60.5363	56.8806	15.5778	75.8554	57.0828	53.7447	72.7614	15.3978	42.0533	45.0932	6.55002
ENST00000300403	59.0955	32.5264	69.7834	103.762	82.206	78.6081	29.9303	24.8709	22.2812	62.6666	105.888	57.2131	67.4299	41.0243
ENST00000351677	58.7646	23.5035	32.3731	29.1596	33.0515	29.3265	29.3919	32.0705	20.2047	29.8771	42.2827	26.721	31.569	18.093
ENST00000372805	58.5166	52.4762	62.6265	68.6244	69.0303	61.9073	61.1174	59.8041	46.0104	4.30966	58.0707	6.0363	56.5186	52.0709
ENST00000313468	58.5165	85.8649	96.597	92.7596	106.278	104.485	117.55	117.8	104.01	91.219	71.8927	93.7108	86.8984	88.079
ENST00000381150	58.494	46.7573	68.7797	73.5256	91.624	68.1266	71.9411	72.8714	56.1488	69.9148	52.2505	78.9626	87.3635	68.5507
ENST00000234111	58.4872	18.3174	42.8928	38.0488	37.6772	26.2502	25.4981	37.4942	39.8321	49.4015	42.9112	15.9764	27.6444	10.127
ENST00000270792	58.3035	44.2676	52.7217	52.2429	47.9896	47.6683	56.5442	59.6597	41.7191	59.5173	60.966	62.5134	51.4804	41.3596
ENST00000236051	58.1815	71.1761	87.665	87.1424	92.0477	68.6083	97.4744	76.9748	87.4556	94.6007	62.5155	75.3472	71.4917	52.025
ENST00000348035	58.0318	60.8214	67.6834	57.4658	63.3622	55.936	60.486	49.6831	40.1205	53.7557	50.1	59.5203	45.2469	37.8112
ENST00000310118	57.9252	12.3711	18.9213	16.6789	17.9055	14.6841	19.0757	25.9414	16.4532	23.6803	29.8637	18.2172	27.0201	13.409
ENST00000409248	57.8823	108.194	121.359	128.879	89.5247	109.079	137.517	140.13	94.3385	136.962	101.155	113.993	88.3816	129.337
ENST00000301764	57.5974	54.4781	59.7467	59.5441	72.8444	59.5271	57.233	55.0194	41.5764	56.2514	59.9325	57.3877	50.1657	46.0631
ENST00000209875	57.567	9.29629	15.5417	12.1302	10.2212	12.9335	8.51277	16.1678	8.6942	17.045	22.361	10.747	14.1331	6.38505
ENST00000278823	57.4703	42.21	55.3618	62.3938	75.2455	58.3692	48.3781	51.678	68.7827	117.229	73.139	65.1182	62.6247	45.2849
ENST00000543796	57.1108	77.14	136.224	153.242	118.576	133.093	139.804	144.14	103.102	100.391	78.8095	79.1087	86.3339	97.6654
ENST00000358015	57.0376	23.4565	32.4574	30.9944	30.0856	30.0518	20.3082	24.8769	18.7277	31.4086	35.1256	29.0702	33.2965	25.1318
ENST00000530705	57.026	62.9135	62.1066	76.3429	75.3989	69.7906	71.1716	72.1466	72.1086	74.9869	56.9036	65.7981	58.3518	56.1051
ENST00000547859	57.0036	9.21335	11.4922	9.42982	8.32729	8.93672	13.5108	16.1608	9.95508	15.3889	18.674	10.5572	17.7963	5.78519
ENST00000382581	56.9996	35.3899	1.16006	38.1365	25.3807	1.0824	10.9137	1.98474	1.28153	55.0644	19.6171	22.2814	1.27128	25.3245
ENST00000550697	56.8529	72.6396	82.4746	62.7116	91.805	109.792	94.2636	83.4216	121.164	117.6	74.3862	72.6086	69.3102	57.0752
ENST00000360270	56.7139	27.5467	36.8023	33.9234	40.4714	36.2202	37.2836	40.039	26.2482	32.5663	36.475	46.0403	42.9484	37.9888
ENST00000344746	56.5797	44.2686	82.2106	64.5758	52.9752	52.2363	41.6702	59.3976	62.2728	51.5459	54.4751	50.3348	50.6451	83.8748
ENST00000002165	56.5044	55.562	61.2976	63.9945	73.6005	62.6625	72.1605	70.3365	64.9247	82.1307	78.8309	78.4361	67.6268	57.5486
ENST00000375571	56.4845	14.4381	24.0642	21.7593	20.6792	19.2201	16.0917	20.3441	14.9447	22.2819	31.1246	16.9446	28.6803	11.7904
ENST00000303887	56.4773	81.0854	23.3728	62.1278	63.6305	53.9701	56.7418	26.5661	23.2393	28.3287	29.3909	26.6752	22.0562	37.1989
ENST00000250784	56.4479	80.1702	84.7598	81.7472	91.1381	82.0964	94.8412	90.4276	86.7675	81.5104	57.8053	61.2873	44.7773	54.5849
ENST00000309032	56.403	69.5957	48.7544	54.4731	105.739	78.4795	97.5934	105.131	61.9313	86.1335	78.0457	82.7084	65.6267	81.6005
ENST00000285930	56.3701	53.6313	54.0755	54.7561	60.2163	64.3206	69.7149	73.0154	67.5121	78.0969	70.8776	83.8761	58.8647	85.234
ENST00000530028	56.1477	18.7489	29.2415	26.3617	41.4668	35.879	35.7125	37.7492	32.463	33.9798	29.8631	31.8123	34.6163	29.5763
ENST00000367815	56.0911	38.7628	30.4069	21.3691	28.1113	33.6538	42.0263	42.1824	25.9775	46.8857	31.1553	32.8248	28.4568	27.1184
ENST00000449934	56.0415	56.6429	53.6182	64.692	67.5942	62.7046	71.4209	69.3224	66.546	89.3506	74.6969	56.3799	54.7816	53.9604
ENST00000538814	55.928	36.2876	49.7105	52.7811	40.9541	34.9182	43.8169	58.2256	60.821	66.2266	43.3682	25.1977	42.5897	22.6454
ENST00000253108	55.9156	47.1686	69.1294	100.382	69.2928	59.2456	74.0202	49.9095	66.0907	74.5631	94.3137	56.8625	59.76	51.7869
ENST00000450554	55.8005	52.2054	57.5161	62.7799	65.9951	58.1681	65.9485	64.0944	57.807	90.3776	64.7259	57.2482	68.551	39.3603
ENST00000326577	55.788	97.6581	81.8456	122.867	107.974	94.1337	187.981	174.531	146.48	171.585	106.481	120.629	102.805	65.7133
ENST00000257857	55.749	61.3473	49.208	54.0564	110.799	103.867	121.862	106.272	118.015	109.134	96.2889	141.29	133.941	149.717
ENST00000243253	55.6534	32.1727	38.963	16.4872	37.7113	31.3859	35.1198	35.9921	29.0671	17.7886	36.1196	36.9076	46.1076	28.4799
ENST00000216297	55.4873	21.2909	28.9665	26.2638	35.539	30.8861	29.5524	33.991	30.4245	48.7756	41.5423	28.9169	35.1224	21.7355
ENST00000263270	55.4568	79.5152	65.4123	76.9064	71.6805	78.4643	82.3303	83.3663	96.5115	104.477	76.363	80.0223	65.0961	72.4444
ENST00000211998	55.4058	35.7402	43.0697	24.372	35.2865	0.018007	28.9564	17.2818	16.5764	0	0.035465	42.135	44.3563	33.3075
ENST00000542575	55.2742	30.3988	38.1091	28.6192	35.7601	32.924	36.16	45.5215	30.6793	52.4978	66.863	50.0935	54.2667	19.8739
ENST00000366839	55.149	58.8669	4.16092	4.42877	60.3988	5.41499	9.8416	5.78731	11.6548	12.3175	7.89535	5.8574	5.81173	6.47427
ENST00000281871	55.042	87.8681	86.7516	96.021	97.9619	95.6446	112.778	113.329	97.9755	110.316	51.1026	84.054	84.4072	78.4567
ENST00000261772	54.8377	28.3071	29.8886	28.923	28.7282	44.3199	33.1759	29.282	17.6435	34.5982	53.5156	55.2004	48.0716	36.9321
ENST00000547649	54.6668	139.455	119.514	104.199	215.929	152.036	169.252	183.953	249.914	218.641	130.977	223.71	107.529	104.653
ENST00000345201	54.4256	0.851018	57.3064	10.0307	28.2841	0.858627	54.5887	9.7159	20.9358	0.145386	0.561187	14.9216	13.928	4.91248
ENST00000376630	54.4124	52.7253	64.7023	72.7963	75.3468	54.9998	73.718	81.9011	81.4157	133.272	129.699	97.2172	102.893	106.17
ENST00000339950	54.2585	7.41365	7.41855	6.96483	39.6592	7.45935	31.6523	48.0743	64.3693	13.4496	40.9353	37.3579	9.84022	6.11869
ENST00000409906	54.23	121.514	116.786	131.592	116.874	113.562	136.708	151.311	148.096	138.573	105.688	116.16	92.8243	133.018
ENST00000393196	54.2275	76.0157	88.954	166.826	116.29	87.7919	108.972	113.417	124.861	119.272	89.8103	186.063	111.162	67.4395
ENST00000371873	54.0716	42.192	43.1376	19.3818	43.2442	34.0477	43.4389	43.1913	31.6569	32.1201	17.1239	41.1861	45.0878	35.1064
ENST00000375784	54.0299	35.2447	53.1881	49.6703	47.9685	36.9728	34.1532	35.4919	32.0638	40.3185	56.2183	42.5566	43.1869	31.0724
ENST00000439936	53.9467	35.5033	33.2345	28.7716	3.66345	30.1605	37.8106	26.8033	28.1126	32.3898	31.073	26.0309	28.1759	20.6464
ENST00000373116	53.9014	42.0744	44.5933	42.2976	71.3675	59.282	70.0682	66.1289	55.3981	62.2593	68.5737	58.3701	55.9099	41.6621
ENST00000252818	53.8419	33.8592	23.1056	17.1118	31.0127	46.7974	47.1991	31.6446	30.6732	59.9578	51.7117	47.7569	41.0545	36.5106
ENST00000246548	53.6655	42.8031	42.9179	10.6464	42.9852	35.1064	34.0835	28.1878	27.8801	23.2253	33.8549	31.7014	40.7658	33.912
ENST00000519374	53.4613	59.5067	31.3167	30.4954	30.4013	27.1118	28.9118	28.2487	23.5028	24.3761	22.7986	26.5979	29.3135	25.163
ENST00000308162	53.4128	21.502	10.801	54.11	3.15116	49.1627	20.6605	52.051	111.677	41.2668	16.9478	238.632	238.615	188.24
ENST00000323853	53.3855	5.66343	10.797	10.6997	11.0771	12.3944	10.102	16.208	7.92286	20.6136	29.1943	11.7253	17.5245	8.71991
ENST00000251413	53.3593	25.7264	29.3403	28.826	28.0661	31.398	38.2529	38.7612	31.2912	42.5114	35.8998	40.7086	35.9148	26.372
ENST00000054950	53.3004	45.4214	47.9167	50.1489	60.9325	62.7159	54.7507	58.6674	44.1722	77.9729	69.6389	78.4062	69.5546	71.4904
ENST00000438552	53.2891	84.3679	103.517	112.967	127.236	92.3771	116.355	110.959	124.505	139.286	114.811	115.312	83.9619	114.063
ENST00000381844	53.1906	5.38746	29.6502	7.66308	26.6095	4.00388	25.8719	23.4675	4.73609	8.34207	4.8402	17.5747	29.0643	3.42914
ENST00000361298	53.0934	57.0585	54.6023	19.5753	72.008	73.6554	82.329	78.9329	70.2017	79.7816	67.9209	81.0666	65.8936	67.8168
ENST00000334956	52.9787	22.9999	27.5351	26.4531	29.7715	30.1608	33.9424	34.7127	20.7172	20.4581	25.6359	29.222	35.1971	25.2531
ENST00000274065	52.9675	217.535	134.805	222.641	119.442	140.706	322.954	44.0876	117.029	146.11	121.076	160.687	139.082	154.096
ENST00000242719	52.9519	36.0362	14.3959	15.7787	38.3342	33.0319	14.5153	30.489	9.95938	16.1816	43.6123	20.3629	21.3499	32.5446
ENST00000300289	52.8803	27.1122	30.5695	28.9396	44.4432	40.9473	40.8054	48.1592	38.4806	50.2045	42.076	48.5267	53.4779	48.9091
ENST00000312189	52.8007	61.732	82.7066	98.9556	93.7711	81.5197	51.6094	44.5666	41.4735	36.3714	57.6816	59.6673	50.6072	41.6094
ENST00000272274	52.7471	31.8734	30.0079	31.8056	22.8209	31.6581	39.2968	34.3565	23.9335	18.9914	19.4723	19.6534	26.9537	19.5064
ENST00000549259	52.6958	17.5229	81.419	23.6339	38.2379	66.6561	85.501	94.0971	113.607	27.0914	87.7753	23.7646	18.6384	19.5596
ENST00000216479	52.5304	39.9353	47.7379	52.7353	85.801	48.251	42.6834	53.7899	36.882	57.7851	52.8312	41.1341	55.0488	27.0578
ENST00000286428	52.4083	57.2899	56.5073	64.932	44.337	58.6894	67.9006	61.6403	57.2411	65.0066	61.361	54.9021	56.7584	42.1987
ENST00000369155	52.4063	412.888	167.567	77.3089	116.769	121.988	124.668	100.958	134.072	183.127	69.4628	120.023	107.247	111.507
ENST00000256854	52.2607	44.5699	45.7348	50.7983	56.2901	54.6731	49.3189	47.009	41.5374	53.4073	53.8122	48.3014	47.0206	38.0356
ENST00000303436	52.1568	54.3414	55.45	58.4541	42.3045	60.8919	51.5397	53.0481	48.9612	59.7182	61.262	62.0362	51.9217	43.7024
ENST00000546463	52.1521	14.8001	11.1708	15	19.5648	11.6823	18.1405	28.7477	6.24954	11.0026	46.9709	5.82465	29.3314	14.1052
ENST00000001008	52.0826	52.3181	55.9173	60.4959	80.4887	55.9698	63.3126	60.9901	52.6598	64.5847	72.3579	64.4865	57.061	42.0271
ENST00000373768	52.0226	41.8786	42.4956	41.5664	38.5674	39.4837	49.9743	46.9734	31.8018	41.9896	48.2344	41.6754	42.2096	34.4423
ENST00000398148	51.9477	22.4068	23.6088	27.0236	25.2987	21.5883	26.0365	32.2692	18.9641	33.4526	39.0207	23.2291	37.8808	15.4441
ENST00000394920	51.9128	17.524	29.0617	20.8453	22.5857	23.6864	27.0751	39.3664	27.2194	32.8681	37.4426	9.95432	37.2878	10.2769
ENST00000393868	51.91	59.9453	54.4754	55.3552	81.9652	63.8871	75.0412	60.3946	46.9801	46.5895	53.9317	59.6869	54.1572	45.5762
ENST00000394485	51.8861	157.551	182.968	160.562	191.233	142.212	150.218	121.169	100.988	107.649	99.7547	98.0572	156.928	117.337
ENST00000304141	51.7828	38.0356	63.4373	62.5886	42.6727	45.1217	39.4132	35.2962	28.7588	36.6304	46.3738	63.3764	57.2273	45.0448
ENST00000244520	51.6876	79.2985	82.3848	93.7317	106.26	85.3081	118.108	110.509	89.8671	110.557	86.1277	91.4841	79.0213	62.6515
ENST00000295688	51.654	44.7074	65.1584	73.1907	72.7036	50.0578	91.1	70.4057	51.6637	81.6423	81.3692	78.5924	34.3698	41.9455
ENST00000358528	51.5876	18.6944	36.3634	12.0542	20.6581	18.8866	17.4422	24.2918	19.08	31.4731	34.646	14.64	19.1494	15.5155
ENST00000414487	51.538	70.9115	68.0356	74.8842	85.7589	75.6603	94.8084	91.1222	85.6594	86.7778	70.9039	72.3978	65.8683	59.9179
ENST00000298289	51.3007	44.2015	53.0469	53.3394	104.47	81.6651	102.773	109.867	115.29	126.747	94.5276	84.6608	73.9415	60.1169
ENST00000344548	51.267	130.363	114.736	99.4026	114.227	105.428	108.891	97.1954	92.7335	88.6176	72.7373	83.9881	77.5995	82.7523
ENST00000548925	51.206	62.69	66.7565	71.9465	71.6444	77.0021	83.3982	78.4344	72.6193	75.2671	61.6895	68.1588	54.6595	54.9667
ENST00000614378	51.0567	0.19143	208.789	113.131	198.95	206.638	0.098526	61.9844	105.76	171.18	0.270386	142.658	121.433	0.426536
ENST00000581486	50.9351	43.9112	50.4554	58.9325	57.9225	47.6372	41.8759	52.8737	66.7699	69.2036	62.6174	48.323	56.2062	40.6199
ENST00000381401	50.8797	27.298	34.4861	32.3708	35.7964	39.0075	38.0998	47.0349	33.9715	53.6959	46.5261	34.9746	32.9899	33.3216
ENST00000361059	50.8124	35.3465	33.4435	42.8395	34.8767	32.8748	32.3543	40.0942	31.1978	34.3037	38.4775	28.6268	38.5098	18.3141
ENST00000211314	50.7802	61.2153	60.1431	55.7234	46.1703	50.0293	69.1864	63.7455	51.3794	41.0283	31.05	49.2309	42.0838	43.2433
ENST00000054666	50.6056	41.3127	49.5502	50.43	46.8558	37.4702	46.4327	51.8815	43.4978	49.4577	41.1168	35.0304	40.1641	33.9056
ENST00000225969	50.5583	77.5027	86.3362	95.3943	109.348	89.8708	104.106	76.0918	81.7331	151.959	93.1816	75.9736	75.9682	55.1334
ENST00000368858	50.32	49.0386	76.0972	79.469	57.068	60.2821	55.1608	47.2863	60.1685	84.5748	81.9673	65.9609	66.522	68.7817
ENST00000559345	50.2608	0.131389	0.1893	0.057439	12.4404	1.06479	0.142447	13.0767	0.053537	14.4143	0.047436	11.9591	0.756728	0.186506
ENST00000392133	50.0138	74.1303	95.5263	94.3692	73.0807	69.8553	73.8167	40.8581	48.6473	71.1173	61.6733	48.642	53.2639	44.0599
ENST00000205636	50.0119	44.7535	47.0736	52.6635	52.291	44.8521	45.3163	47.7267	41.015	50.3086	49.8977	46.2722	48.6233	39.602
ENST00000321556	49.8796	29.8387	39.2497	36.1897	44.862	40.6614	40.9605	38.3707	30.4121	33.8638	38.3156	31.5998	33.3709	27.9216
ENST00000353107	49.8597	76.1245	78.5028	79.5282	71.6355	63.1067	90.1469	102.394	97.4871	99.7366	63.3094	65.6648	68.8605	55.7662
ENST00000225655	49.7234	71.1353	75.462	82.7965	104.553	83.9533	110.88	101.406	96.2922	101.953	73.9795	105.494	80.1187	69.8769
ENST00000372209	49.5416	64.0384	59.9371	50.0434	59.2579	55.2945	65.6644	66.6993	56.2799	54.3276	44.4988	50.0451	54.1652	61.9153
ENST00000356493	49.5397	32.7387	56.2936	40.8713	58.8329	50.3414	49.258	70.8806	50.3943	51.9188	56.6389	66.3535	51.9924	52.0935
ENST00000361789	49.5212	6.33701	7.37314	7.01333	4.93678	7.1819	6.15316	7.28919	2.38753	3.12477	5.45091	4.50631	5.71543	3.698
ENST00000259873	49.4605	49.8299	60.1879	65.1593	65.7441	57.1399	70.7486	64.1806	70.8187	92.2931	72.3732	70.332	64.7473	48.3574
ENST00000200639	49.4323	49.3241	22.8723	57.261	53.2396	55.3733	50.7426	53.146	45.5321	59.7804	61.4242	64.7187	53.263	61.4893
ENST00000393190	49.424	74.7041	83.2413	86.164	108.384	69.9606	100.309	107.588	105.933	98.0509	69.4157	89.3621	75.9736	50.8405
ENST00000252699	49.4102	23.3506	31.1234	28.4708	27.0205	21.6633	28.6547	29.6258	19.7368	31.1549	20.2422	26.5496	38.2378	21.1543
ENST00000246868	49.2601	52.2364	54.0865	49.5116	45.8649	35.9654	62.5738	66.2854	51.3133	72.4478	47.4568	44.9822	44.0501	26.0448
ENST00000369541	49.253	46.9355	48.7522	52.9917	61.2649	49.9977	59.3136	54.51	62.3739	81.5123	72.3322	57.402	61.4555	42.4628
ENST00000564546	49.1638	83.0753	78.0113	100.658	31.7194	62.2787	31.7565	116.342	34.6269	45.7081	32.8188	22.2702	98.8162	107.945
ENST00000367194	49.1292	92.5198	95.0557	107.607	143.337	120.349	161.055	168.892	168.592	174.577	147.217	153.567	122.05	117.908
ENST00000464167	49.1015	166.792	136.08	83.3609	245.683	113.945	174.257	233.159	233.425	268.191	127.034	234.059	136.999	147.632
ENST00000322611	49.084	29.0657	35.0302	39.8907	47.5442	37.9448	31.0628	27.2002	23.7342	36.8516	39.1236	36.4125	49.0433	28.0933
ENST00000435844	49.0725	61.1185	50.6453	56.9454	59.4317	60.6146	78.0296	78.5308	81.7719	84.9313	52.8298	71.0753	52.8893	59.1596
ENST00000303151	49.0069	63.3813	71.502	70.4945	70.3628	63.7293	80.2498	127.25	167.981	173.694	79.405	71.9807	60.588	48.0206
ENST00000442744	48.9355	47.4037	51.3248	53.0217	55.1669	48.2473	60.8087	62.2924	57.2235	68.0097	51.9224	42.7172	48.8809	43.6158
ENST00000592683	48.9126	0	0	0	0	0	0	0	3.36943	0	0	0.058479	0	0.040941
ENST00000372733	48.9079	76.5546	56.3676	42.6526	45.4594	52.0407	57.4298	101.533	97.1755	88.3503	69.7959	75.0874	69.8432	69.587
ENST00000321265	48.869	22.0428	29.693	28.3258	33.0109	27.2813	34.6506	35.4236	19.2006	40.9047	47.0797	34.9041	38.6095	23.3602
ENST00000535923	48.864	43.6109	41.2455	46.8039	73.3425	51.7311	64.9357	58.5965	56.6238	59.1336	49.4029	45.2795	53.4914	44.109
ENST00000306185	48.7795	62.0914	60.2558	68.9151	76.1321	59.0771	66.9776	50.5056	43.0265	44.2382	55.2093	58.7679	47.9467	41.5341
ENST00000377191	48.7449	42.7968	49.0176	52.902	59.9173	47.862	42.9703	33.6864	28.3465	38.7618	56.5191	52.9912	51.6616	44.7963
ENST00000302362	48.5514	57.7681	60.0801	64.2076	93.6026	60.9973	88.4184	64.3926	90.2149	103.945	87.5468	74.7676	73.6861	52.3602
ENST00000230895	48.4428	13.2369	20.4652	20.304	13.9698	13.6443	16.0834	18.7909	9.31738	17.5306	21.43	22.3486	32.5183	18.1036
ENST00000372798	48.4304	49.4324	62.8521	63.6272	73.1956	57.7446	62.5232	55.1686	44.7715	60.1862	59.0933	77.0466	49.9711	41.9318
ENST00000357214	48.414	68.9898	74.7013	86.8953	104.147	74.5303	58.437	54.6286	40.7235	71.7444	67.7597	54.756	57.6824	23.921
ENST00000396821	48.3852	37.5123	36.3004	18.7344	27.1189	46.5956	32.2792	25.8638	22.3252	38.7732	34.2977	37.0821	31.7637	26.8006
ENST00000615164	48.3689	0.103556	0.229322	57.4702	95.1326	142.841	0.131763	88.17	109.02	0.925745	2.2863	87.9915	79.6163	2.59487
ENST00000311481	48.3469	29.0059	34.5385	35.0017	44.1429	40.1784	52.1148	53.7598	39.9214	46.2938	48.5902	38.2611	39.5436	28.5331
ENST00000370179	48.3337	18.0924	23.7417	24.2216	18.6476	22.5638	29.8617	36.32	19.6039	38.2326	30.4897	23.0215	23.6834	19.8561
ENST00000458500	48.3066	97.571	125.442	76.674	75.999	69.942	110.099	81.9253	77.9005	94.5603	128.028	50.1374	73.0304	82.5114
ENST00000257904	47.9662	53.234	40.2879	27.849	27.8304	19.8751	48.4799	27.0765	35.3886	76.9201	18.8458	23.7291	28.5437	15.1058
ENST00000274289	47.8245	30.9117	40.3005	39.5238	48.4723	56.2029	20.2081	40.6427	45.5009	62.2469	78.1855	55.6914	60.0402	53.7304
ENST00000300688	47.7345	69.8228	68.5015	79.1176	91.5097	80.5311	105.388	120.592	103.93	123.251	74.8779	79.9314	69.7941	66.6446
ENST00000322535	47.6993	17.157	22.0763	20.0114	31.7294	27.7441	29.6632	35.3089	24.9453	39.0543	49.5077	28.6927	33.8447	20.5503
ENST00000419752	47.6685	6.52591	14.969	16.9995	11.8037	21.6749	9.77571	12.1504	6.38907	9.03063	14.4826	16.1501	10.6111	6.17307
ENST00000366672	47.6303	22.3349	27.5107	24.1684	36.0263	38.7783	35.6761	36.5748	20.0024	23.2495	17.0984	29.3696	36.5233	32.8146
ENST00000367549	47.618	23.9336	31.4626	28.9671	37.4804	34.8249	28.9102	30.7341	27.9698	41.1335	40.0844	28.4171	36.2767	18.505
ENST00000652332	47.5193	35.0522	41.9641	39.793	47.4525	49.2374	47.091	45.7833	36.6141	42.5929	27.7904	53.4292	61.2807	65.2063
ENST00000621829	47.507	25.4343	30.0913	28.4258	34.061	30.2709	26.1431	25.5457	19.522	42.3641	44.294	28.5747	29.8304	19.8715
ENST00000525451	47.4594	29.7673	12.6289	18.8842	55.1409	34.1799	36.6979	34.3939	25.2421	32.0892	23.8417	83.073	42.4198	46.3505
ENST00000397375	47.359	40.9973	50.0902	48.7447	58.6093	51.9788	64.3615	69.3561	60.7405	78.4795	55.501	56.549	48.0556	35.8322
ENST00000373019	47.3567	33.2748	39.236	38.3886	52.2976	39.3996	42.7771	41.0463	34.7475	51.388	54.3175	43.8333	47.4402	30.4156
ENST00000335007	47.3038	22.9343	39.1667	38.5808	37.9603	32.2246	21.5338	15.5601	18.8599	40.7121	35.0898	26.5966	27.599	21.3941
ENST00000358994	47.2862	29.1781	34.377	35.4592	34.8361	32.6109	33.2158	32.4837	14.595	26.5513	32.9319	24.9951	33.5733	17.2771
ENST00000545683	47.2705	387.637	218.166	77.7738	125.247	168.769	0	0	151.047	221.943	65.9326	11.6026	96.6004	83.8807
ENST00000306434	47.2421	53.0731	69.6242	32.5957	18.3495	41.0736	30.1153	29.1073	13.3985	31.8211	43.0084	39.6648	30.882	28.7647
ENST00000216218	47.0839	38.0518	38.9964	36.9318	52.6149	46.7032	48.0616	46.2247	37.3297	41.1193	44.7062	47.0159	41.2039	44.228
ENST00000227525	47.0839	37.0323	39.0995	39.2247	42.196	39.2066	52.7753	52.427	42.5281	57.0831	38.2977	47.1767	51.0825	35.6147
ENST00000490680	47.0683	34.8434	38.2415	30.6744	34.6935	30.09	35.201	23.5956	25.4022	21.7017	36.9793	36.9419	20.216	25.223
ENST00000353999	47.0235	13.3585	21.1962	17.898	24.0532	20.0794	19.7937	26.8597	18.5234	25.4518	30.5852	18.8532	28.025	15.0505
ENST00000624481	47.0141	26.0363	15.3595	28.168	7.21901	42.8157	35.2647	42.7284	38.1899	6.15041	32.1613	54.7957	9.25409	41.6691
ENST00000329305	46.8585	64.1415	48.4918	49.1991	98.8586	77.2427	113.161	113.168	71.3694	102.251	84.8223	92.4486	74.6945	64.3038
ENST00000552783	46.8316	24.249	26.5555	34.2114	27.3632	27.5958	24.945	27.6489	16.95	28.0248	28.6089	29.64	30.6436	26.0482
ENST00000399808	46.817	42.2743	41.3545	43.6317	43.3872	59.8627	45.1781	49.8207	39.3281	66.2368	77.1273	167.721	200.392	197.836
ENST00000281031	46.5805	80.0773	30.7484	44.2062	26.9085	40.1505	0.216363	0.809997	25.2626	13.5517	1.26336	28.4984	0.288229	0.136059
ENST00000337392	46.5731	10.9949	25.462	13.0925	28.6939	26.6495	31.7694	19.9646	11.6122	34.0407	21.9321	15.7166	18.6796	20.5881
ENST00000315579	46.5408	13.6324	26.4742	29.3688	34.7703	36.8973	19.996	20.4402	13.6436	37.1256	52.0407	30.3453	40.4554	22.3172
ENST00000256442	46.4318	69.444	186.387	322.625	225.904	188.093	44.9009	47.5273	68.8718	111.049	184.972	113.742	124.864	83.7469
ENST00000233084	46.3649	18.2823	24.021	23.455	24.2922	20.8801	21.9952	23.5194	15.7761	21.7414	36.5974	21.238	27.2927	15.6211
ENST00000184266	46.3121	69.2257	69.4405	76.5032	60.8834	63.5887	76.9346	71.7762	58.8682	56.3145	57.1778	60.2959	62.0256	66.3213
ENST00000481767	46.2767	48.769	2.29738	32.077	28.4174	37.0919	31.0043	0.986912	17.5404	1.79138	24.7872	32.5629	32.8356	35.8638
ENST00000297258	46.224	89.8304	92.4098	99.4651	93.3601	63.3739	106.098	116.266	69.6556	121.285	75.9588	102.291	79.062	56.6102
ENST00000553474	46.1351	0	0	0	0.008329	0.00076	0.029485	0	0.000398	0	0.008447	0.011044	0.007911	0
ENST00000222284	46.1239	45.0829	57.8228	52.9922	46.8679	51.397	60.5612	58.1235	44.4976	53.0972	48.1351	48.8744	47.1073	40.7371
ENST00000393893	46.123	28.9619	55.6174	58.3123	1.15406	9.62653	0.31617	57.0901	40.9828	48.8264	8.35719	51.2501	48.861	44.7377
ENST00000216190	46.0351	40.8836	46.1144	12.4674	56.3481	47.5493	3.56153	5.15103	44.8733	71.4825	14.2962	39.5207	37.8767	16.4173
ENST00000379847	45.7912	67.4378	63.6993	68.7004	61.4309	63.9697	73.7794	70.3545	65.5754	57.162	43.731	51.9517	52.9655	56.8516
ENST00000613174	45.7542	401.645	177.52	60.8059	122.541	124.061	93.495	68.1406	85.3659	142.459	70.1314	117.97	104.411	83.0109
ENST00000420959	45.7069	0	36.0394	0	26.5022	0	0	0	0	0	27.5055	0	38.6049	0
ENST00000393784	45.6899	31.625	43.493	43.6797	43.5127	42.4597	41.4834	38.3362	27.2458	26.6043	27.8037	49.6534	48.5272	46.412
ENST00000372014	45.5907	57.6335	62.4132	61.2255	67.2863	58.2612	54.7578	48.3534	71.6721	85.8223	57.2063	62.2243	54.9757	49.8384
ENST00000392514	45.5802	102.531	73.8132	101.961	136.015	73.2663	100.592	186.534	74.8791	90.1284	115.474	191.11	88.4341	150.04
ENST00000367385	45.4881	46.2383	56.7635	46.273	40.4057	37.3488	29.3105	23.0619	16.2843	20.1859	36.7152	44.2745	49.1453	41.2677
ENST00000305533	45.4782	42.3253	47.2867	49.5858	52.0371	44.887	49.9323	45.8897	38.1751	50.0158	53.1792	52.0937	48.3361	45.5726
ENST00000375661	45.3772	43.9404	41.1379	46.6667	43.9095	51.0225	49.1394	31.8748	30.1042	53.2585	41.6883	42.7733	43.0623	42.6238
ENST00000262213	45.364	30.052	36.6427	38.7841	53.4122	34.2593	31.0784	38.6211	25.6949	37.0889	42.8905	36.1184	29.8737	25.1889
ENST00000375549	45.2917	42.9162	44.9936	47.0439	30.8229	45.3211	52.7533	46.243	35.0927	31.0444	42.8979	28.4596	40.3679	36.2758
ENST00000367926	45.2817	19.8455	30.8187	25.7415	24.0105	19.9621	15.1919	13.9514	14.5989	23.4864	23.7449	18.3055	22.8234	14.0594
ENST00000312579	45.2254	26.9901	31.4985	31.9992	47.3248	57.3297	51.4802	49.5959	41.8765	76.8039	37.7892	45.0695	43.7192	50.7863
ENST00000260641	45.132	9.73145	15.55	13.9371	11.1493	11.786	10.0397	14.5857	6.49663	11.4555	22.8027	12.7864	16.381	9.61569
ENST00000396634	45.0518	65.9609	49.9089	0.95954	87.4288	0.904512	83.5434	43.713	35.541	109.557	105.347	132.205	177.491	221.179
ENST00000368328	44.9598	55.5877	57.1434	63.9375	67.4618	60.4281	67.0592	59.6537	49.1796	48.4428	48.4147	71.2435	48.9628	47.1208
ENST00000307712	44.9536	34.0357	38.1032	38.0439	41.5248	39.5821	32.268	30.9449	20.9196	20.145	31.1961	33.2334	32.5736	29.725
ENST00000329970	44.9123	40.0628	44.3017	41.7321	49.3373	39.8601	53.8396	51.9852	43.5631	48.7866	44.9525	37.9104	50.8607	25.8516
ENST00000626021	44.856	18.921	21.35	19.0156	10.2366	12.817	13.7253	20.0297	14.0358	33.3978	48.8553	23.4898	28.7923	18.8896
ENST00000520868	44.7573	10.101	9.95284	9.20739	3.23915	3.36015	4.46122	6.80333	5.46767	3.2007	4.53097	2.77541	7.89076	4.50782
ENST00000272317	44.6972	110.642	66.5172	71.1094	99.0107	118.111	86.2551	97.0124	75.3429	132.797	50.678	84.892	65.7913	101.456
ENST00000216225	44.6555	70.1763	69.6078	71.0396	71.5647	64.8854	75.79	67.2451	57.3807	59.8381	59.5682	60.6955	59.0399	53.9132
ENST00000379638	44.6347	33.1481	37.2335	43.6156	37.43	36.4709	34.6787	43.0121	24.5812	33.1796	38.951	35.9752	31.3897	22.889
ENST00000553542	44.6319	49.0506	50.8768	49.5777	34.2596	32.1903	48.5589	50.8326	42.2484	36.9248	23.0693	22.1905	31.4283	29.6444
ENST00000580018	44.5768	50.7581	59.2121	64.7149	68.0161	51.293	50.1967	37.925	33.3408	52.0855	58.8351	57.5544	54.702	38.6235
ENST00000333762	44.5569	45.0413	45.1954	46.8555	55.0426	81.1067	52.7852	52.8024	41.0549	66.0701	42.6537	41.8577	45.93	51.9774
ENST00000590247	44.4975	80.4819	70.9095	87.3553	139.391	73.7308	124.836	118.365	99.6745	85.1153	77.5403	87.9664	77.3077	63.1628
ENST00000394048	44.3984	21.477	28.3405	25.7727	34.4911	30.698	27.2042	28.772	23.8175	30.5151	26.4449	25.325	29.3634	21.1218
ENST00000492354	44.2379	33.5205	41.4401	8.4391	9.17649	31.1594	37.7911	39.9823	6.51299	55.3697	38.0591	34.0719	40.1259	25.7105
ENST00000591899	44.2136	85.8483	84.6367	91.24	93.4023	88.0439	96.875	88.1071	95.8627	96.3606	75.9654	96.9306	73.075	87.2279
ENST00000640332	44.2047	36.6212	35.3619	18.7174	19.7333	51.567	23.0343	15.4464	16.4066	40.2373	39.2777	43.807	37.1418	25.8965
ENST00000358171	44.1593	33.1657	53.7287	54.7421	54.7651	62.7425	34.0021	41.6998	37.0762	59.9801	51.694	69.8204	95.7135	20.7732
ENST00000396172	44.1447	42.4951	49.4763	42.5993	1.37474	39.0828	38.4651	44.7281	31.0525	28.9101	42.1006	47.8051	44.2722	16.407
ENST00000541272	44.1144	29.1428	29.2896	29.0705	35.045	32.4186	40.3623	33.7606	21.6989	25.69	40.2304	28.1825	34.3534	23.7724
ENST00000354546	44.0322	32.3099	38.2267	36.5807	47.8221	48.8215	47.3865	47.9976	31.4252	32.818	30.6962	55.6954	51.8501	45.0364
ENST00000378026	43.9798	15.1188	23.2205	22.325	24.8058	24.912	18.2351	25.9537	17.6023	26.3573	21.9274	26.5195	43.4098	25.2591
ENST00000320623	43.9632	43.1479	45.9067	43.7686	45.1903	43.2253	52.9655	48.2347	42.9534	50.2143	9.47192	14.1851	17.819	13.9859
ENST00000451315	43.8401	42.3491	46.7818	51.3441	66.8984	47.7242	56.2378	43.0893	38.0049	61.0366	53.8116	50.4234	49.1286	34.3153
ENST00000223500	43.839	57.5785	56.3346	61.0898	59.5948	58.8729	65.2432	59.7668	53.5929	60.8332	64.0027	71.1578	65.9557	68.3127
ENST00000456936	43.5086	42.7073	47.5989	52.2562	51.2307	33.9977	33.6285	39.5542	36.5844	40.0931	33.258	40.0556	38.3847	44.8107
ENST00000322723	43.4806	10.4346	18.9616	15.1496	16.9458	12.8416	14.3226	21.0195	12.8465	27.6228	23.62	14.8237	22.6651	8.36993
ENST00000311151	43.4769	21.2326	25.2965	44.7507	25.7003	42.0994	22.4895	5.48796	20.5631	14.9051	17.6863	21.6306	40.1796	5.4228
ENST00000234677	43.3945	40.8732	39.6785	42.2383	43.8523	52.3996	44.2655	42.2241	38.3097	49.4351	65.1652	47.4956	46.0798	36.4203
ENST00000616552	43.3691	0.298529	20.9611	0.554174	48.2656	14.2589	15.1288	10.951	1.31163	52.4	0.513699	51.1721	37.5128	39.5484
ENST00000380377	43.3238	77.8807	70.7078	82.3905	99.5946	99.7102	115.09	92.1215	57.2912	53.586	64.8183	101.732	86.9217	94.4951
ENST00000564057	43.0229	0	33.8839	33.3905	0	23.6979	0	0	0	0	0	0	36.6184	25.5632
ENST00000328663	43.0038	43.1453	47.2081	51.4658	41.7	38.0701	48.6578	73.3906	65.7286	53.1577	61.4108	47.1315	46.5632	28.8344
ENST00000607357	42.8792	62.9896	60.7698	65.209	61.4535	58.4235	78.9054	83.6367	71.1865	72.4871	58.5145	56.2753	53.9997	46.3795
ENST00000262225	42.7622	38.584	41.6159	43.6656	36.6159	34.4037	33.8606	45.2854	45.5573	87.0229	38.6647	38.3534	36.6913	34.2254
ENST00000258145	42.6839	25.2654	30.4091	30.1824	32.21	33.5465	30.1867	31.5724	25.6349	30.4465	33.716	36.0116	40.4483	42.3283
ENST00000336812	42.6353	43.2923	48.2842	58.2343	68.044	49.2404	39.5528	27.706	30.1548	48.913	51.7561	45.8162	42.839	33.8568
ENST00000335181	42.6319	12.0835	1.54371	13.6298	7.56821	0.70242	3.63349	8.19133	8.59056	1.36559	6.76572	5.95573	11.3837	10.1331
ENST00000442664	42.6129	0.474906	0.693904	0.625544	31.5814	0.593154	0.513057	0.515717	17.5474	28.8182	0.550231	26.5353	30.9755	0.577478
ENST00000330029	42.4876	62.4917	57.4396	58.8029	60.7861	61.4726	81.426	80.1512	71.2572	67.6326	48.5032	53.1835	45.0771	45.6761
ENST00000303577	42.4461	15.6404	20.215	19.4429	18.0971	19.6186	23.2809	26.4456	16.5634	35.8519	24.8142	19.7379	25.7232	14.3869
ENST00000273258	42.379	35.3366	32.7124	42.6037	47.5527	50.2715	38.0895	37.9631	30.2403	32.9032	35.8812	23.9023	30.9277	49.454
ENST00000304979	42.3388	53.614	52.5196	60.0928	75.8754	64.1279	80.2963	73.4577	66.3787	75.1076	54.3181	50.7088	48.3843	37.6242
ENST00000556029	42.3338	39.2714	47.2083	14.7141	15.3366	44.2436	32.2294	7.63539	6.78638	9.09679	8.39081	26.5472	31.1604	25.2881
ENST00000216277	42.2534	10.1954	15.1962	15.7304	11.7265	14.3536	11.1853	13.6582	6.1727	11.4764	21.6371	12.0444	16.7964	9.1242
ENST00000291386	42.2343	31.9663	37.5966	39.6916	40.9525	35.102	35.7057	28.9783	17.5603	38.8834	42.4598	39.7396	41.5219	28.4573
ENST00000310955	42.1512	39.7601	107.663	177.421	145.117	118.267	38.096	30.2842	41.0989	102.657	152.86	67.6666	81.1299	51.8758
ENST00000368209	42.145	45.8006	54.5847	72.3669	98.6138	67.7892	62.7572	63.0042	53.0625	71.0582	74.4128	72.515	54.8391	54.0147
ENST00000227520	42.132	37.0099	59.9049	68.7397	50.4002	28.1318	23.2702	59.0354	17.305	39.678	78.4108	62.7218	55.8833	25.8749
ENST00000280527	42.1208	21.9205	33.0684	28.8874	23.9869	21.7355	21.1275	21.9748	11.7121	12.2157	19.1498	26.0405	29.6627	23.0631
ENST00000373627	42.0739	30.4883	34.3959	34.2947	40.7825	33.6461	48.6537	58.1753	49.7347	55.7846	49.6793	44.8359	44.0486	33.8551
ENST00000313104	42.0653	179.172	151.245	116.672	95.1217	121.546	245.303	53.1488	163.708	207.88	210.243	65.3043	97.8441	83.0325
ENST00000322989	41.8074	128.427	121.348	88.7261	144.666	68.6936	144.983	126.213	121.862	71.2549	72.6488	84.454	64.9352	135.638
ENST00000366923	41.7117	23.5704	26.7963	25.9625	30.2275	31.7097	25.9063	23.3129	14.4468	16.3381	28.5711	28.2539	29.971	20.9297
ENST00000303904	41.7055	9.38935	13.1325	10.4325	10.6683	10.541	12.7032	18.6395	11.4305	20.2839	19.9685	12.5955	15.5531	6.85693
ENST00000361311	41.6896	19.4087	24.2525	24.6875	22.2399	24.6589	26.3223	25.6438	14.6307	22.712	22.7174	32.5336	40.6532	30.6999
ENST00000225174	41.6405	35.3702	50.0907	42.8886	33.255	22.4074	37.3017	58.0878	67.9781	77.0489	44.9399	38.7069	40.8877	36.3637
ENST00000338435	41.6274	30.5055	30.0495	33.0062	23.7351	24.0358	27.1722	19.1843	15.6622	28.081	25.0678	21.6052	24.1956	15.2975
ENST00000332598	41.6187	14.4176	20.8802	16.7437	24.6955	20.9078	28.8665	41.2027	27.1955	45.3306	43.7963	36.2195	45.2961	32.9676
ENST00000586895	41.5967	31.1792	35.6348	32.3224	20.7861	23.0946	28.0559	33.8536	26.3082	26.5417	29.1773	22.4346	27.9972	23.8969
ENST00000269141	41.5639	28.0146	30.5301	27.2628	25.2015	22.4517	24.0119	22.7242	12.9998	12.1865	17.226	33.4713	34.7241	29.3309
ENST00000264036	41.4669	39.74	45.4657	43.6537	42.5462	33.8435	42.1282	46.5672	32.2091	51.5361	54.6528	62.3965	44.9886	44.843
ENST00000265192	41.4241	17.6582	19.0771	18.8724	8.62128	5.71627	7.62026	25.8038	7.89698	11.019	33.7233	22.6572	23.5549	17.3982
ENST00000545482	41.2334	10.9208	16.1455	12.8934	11.9667	12.4212	15.0969	18.1481	8.65399	12.1974	14.1917	13.2543	20.5804	10.0984
ENST00000580210	41.1542	10.6705	11.5616	112.557	86.4668	100.425	94.4302	73.8663	64.6325	116.555	93.279	82.7324	14.2896	8.45647
ENST00000394580	41.0597	71.0422	60.4083	74.5976	104.112	68.6572	113.303	136.111	121.178	104.831	82.4019	81.5548	88.9156	63.1728
ENST00000372577	41.0275	7.04757	12.3867	9.50391	7.51159	8.08472	9.00764	11.4047	6.86898	14.0122	18.7836	6.70749	12.0487	4.07613
ENST00000272065	41.0074	59.7253	62.0374	73.817	83.7583	40.7207	83.884	81.8262	50.7539	76.714	73.2072	63.11	67.0178	55.878
ENST00000361007	40.9407	17.6867	22.2109	19.8125	24.0836	23.5183	25.9556	26.8932	17.0595	25.3413	27.2617	21.7695	22.9151	16.2788
ENST00000381125	40.8156	10.7282	21.9355	16.3697	12.0778	13.2671	10.808	13.9516	7.72648	9.92132	14.9693	12.1921	20.7134	10.4687
ENST00000357849	40.7942	42.0981	45.607	45.5059	56.829	48.6466	55.5235	40.3725	29.1392	41.9151	51.4436	57.2618	48.6325	29.4761
ENST00000305978	40.7576	39.5125	68.8163	70.5794	51.7808	100.504	66.9604	54.0809	44.0114	66.9884	61.6135	57.3858	72.8687	74.818
ENST00000315554	40.7556	56.3183	55.0504	55.9478	70.4336	62.2082	65.7924	59.7375	52.6818	56.835	66.8089	50.9011	46.3441	38.4568
ENST00000251047	40.745	26.7492	31.4399	28.6391	31.519	28.3931	31.3596	35.4281	29.2418	29.5138	23.774	35.3419	33.8411	32.7695
ENST00000322028	40.6193	6.75544	51.9054	9.16994	10.7192	10.9746	9.2385	12.5123	103.854	127.019	84.705	8.32581	42.1802	4.29182
ENST00000215565	40.5641	119.202	152.456	153.906	169.538	172.303	87.3655	189.715	74.2773	185.086	135.352	142.63	112.201	130.715
ENST00000370990	40.5075	16.6198	25.245	24.0387	28.0647	26.5805	10.2158	12.5456	7.65633	13.8902	31.3272	12.6731	37.769	22.4422
ENST00000371222	40.4643	42.1534	31.8897	26.6294	28.6549	34.0523	33.2368	34.4145	26.3755	41.3212	41.5424	48.0172	46.6547	44.9815
ENST00000219070	40.4226	12.9718	17.3781	17.3452	21.0839	27.5443	15.3089	18.107	13.1345	17.8453	17.2418	23.7751	31.6165	27.3637
ENST00000335508	40.3113	32.4934	37.2567	20.4819	41.5593	37.1419	10.5985	23.9802	24.5755	36.8065	18.6347	30.8969	31.9083	10.7627
ENST00000349496	40.308	30.4178	42.3442	39.4699	0.146451	42.1821	0.268125	16.2788	28.3791	35.3303	12.458	33.6954	30.4912	24.3119
ENST00000270776	40.2914	31.3225	32.4706	47.898	38.047	30.7187	41.1003	51.1537	30.1213	52.7593	44.6482	34.6909	29.3118	24.4629
ENST00000506600	40.1575	0	0	28.0797	0	0	27.1214	0	23.5482	0	0	0	23.9381	15.6721
ENST00000630539	40.1295	27.4861	32.3268	31.7465	41.1903	32.9974	37.7785	41.8073	34.7889	41.4192	33.6039	31.944	38.8421	24.2225
ENST00000064724	40.0843	9.06264	13.2674	14.2554	66.4921	17.664	9.21428	38.5242	9.82104	12.3849	12.2863	17.6258	17.9174	18.6778
ENST00000399796	40.0267	48.0655	34.7712	43.3517	43.1516	41.7131	48.345	50.0335	45.9951	52.6014	51.3369	53.6248	45.0929	46.3786
ENST00000216392	40.0165	28.7793	44.8677	39.5169	35.5658	39.5115	41.4897	41.4509	27.9397	38.7666	30.4914	53.0871	46.7557	44.3986
ENST00000563390	39.9953	99.8999	76.7825	89.9572	138.071	101.771	147.737	97.9476	108.692	124.816	128.534	126.884	56.93	82.5892
ENST00000358794	39.8836	0.406622	20.2117	0.671737	32.0149	33.1698	1.09357	26.0163	20.6563	28.9993	36.5338	0.746207	0.597147	18.1058
ENST00000382952	39.7841	37.9969	39.8331	40.4331	56.0921	44.7187	39.7437	24.1083	16.6795	32.6931	28.593	41.0623	41.7488	30.1443
ENST00000481195	39.7168	17.1435	25.4409	28.0572	23.5527	21.9634	14.7237	18.9679	21.2279	34.2278	28.1729	18.6685	26.1328	12.9024
ENST00000210444	39.5342	19.4988	25.9315	32.551	28.8097	33.5648	33.1501	28.6606	34.9349	34.8543	30.797	27.1995	27.4917	21.9393
ENST00000263645	39.5221	15.881	17.4735	20.3171	22.3698	18.1454	20.7774	24.1726	16.5802	23.7162	28.3038	23.5493	28.0426	19.6218
ENST00000353704	39.4867	39.3328	46.2457	44.2024	51.4908	38.9008	50.5244	53.5259	58.5068	76.3609	72.0985	51.5724	45.2824	32.2633
ENST00000356978	39.4044	12.5154	14.927	14.5109	18.3498	11.1259	9.20942	30.8883	9.83303	20.9001	19.9659	22.0252	20.957	7.42122
ENST00000330133	39.3761	71.0682	76.2383	86.8915	99.1381	82.7751	86.835	69.7289	71.9793	103.487	90.0823	60.6997	63.8952	41.9746
ENST00000526033	39.3569	3.11295	27.379	11.204	1.92268	3.88238	2.65501	3.34944	2.8849	4.28469	6.51102	8.63875	1.41607	9.87817
ENST00000304863	39.3411	39.3827	46.129	60.5313	67.417	54.185	52.8126	51.3362	50.4734	64.3953	54.4901	49.8376	41.8275	34.8477
ENST00000326932	39.3277	10.1656	16.9403	4.00187	7.46279	35.9601	18.9945	4.3708	6.30667	11.2852	13.6495	8.753	24.3739	33.9326
ENST00000375370	39.3163	24.5276	25.3448	24.582	23.0792	20.9292	28.1124	27.2092	23.7031	33.4851	22.5075	25.2996	27.8751	19.6688
ENST00000380680	39.1806	28.6237	35.8784	31.0196	20.4444	18.4804	16.5905	15.5232	12.8735	15.1559	14.4143	15.1317	17.7205	18.2949
ENST00000488633	39.061	23.8691	32.8567	40.2656	37.9526	34.3241	34.7922	30.183	32.6795	42.6874	35.05	29.1049	31.7172	24.4394
ENST00000380071	39.0333	30.7111	25.9422	22.0604	26.856	22.6259	25.2891	25.0385	32.5761	35.9881	30.3944	27.6988	28.7848	24.5205
ENST00000244020	38.9772	49.5533	49.5323	36.0625	22.4285	35.2713	34.738	43.8363	49.2291	42.3919	22.4102	25.105	27.4418	13.2066
ENST00000371485	38.9125	31.6614	56.4636	77.1261	56.5432	49.659	28.5592	25.7497	34.7233	56.6817	52.0212	39.7183	39.4563	30.584
ENST00000416518	38.8427	63.8581	78.9102	79.597	84.5545	65.2676	91.3054	101.915	88.6367	102.256	90.9436	0	73.7762	82.9584
ENST00000258341	38.8379	22.919	31.7549	28.0292	29.9814	26.0359	22.4435	21.4149	13.0155	15.5204	18.0066	25.4559	34.1565	28.7098
ENST00000228506	38.7691	12.686	16.9991	14.8043	20.1655	17.7202	19.4723	29.8385	24.9305	32.5916	20.9456	16.1443	21.5176	13.9833
ENST00000219313	38.763	26.0694	15.7161	36.1069	36.2754	37.3374	36.1215	39.1522	44.087	33.2814	43.2371	37.3454	42.4963	31.9654
ENST00000293379	38.6782	27.5885	39.6005	37.939	40.0647	30.5545	23.2419	21.8384	16.7039	24.9489	34.1649	44.2303	53.7866	46.1419
ENST00000372685	38.524	45.3157	41.977	45.549	48.0069	45.5089	51.7244	43.291	35.0415	43.5723	31.091	45.1237	41.1715	34.4141
ENST00000329399	38.5232	39.8796	36.9651	42.3491	37.3477	40.5393	38.9253	40.1577	22.3488	36.3182	45.9828	49.2487	38.2149	40.8745
ENST00000308696	38.4935	5.48264	18.1979	5.11151	20.2105	18.6499	7.38236	21.3314	12.0998	14.7094	6.92246	5.15535	20.2196	4.46021
ENST00000370086	38.3399	73.4793	53.3825	79.0972	42.4514	71.4085	51.5092	49.8831	48.0931	56.6996	31.1752	48.1301	61.4811	70.8704
ENST00000343053	38.3266	19.2205	22.6283	22.3347	29.4507	27.4854	28.7911	30.1172	29.1695	42.6704	31.4734	27.0594	31.6267	24.4679
ENST00000367889	38.239	55.4974	56.7436	61.0491	60.4477	64.5369	66.7104	59.6216	55.4361	37.2149	38.041	54.6064	47.2996	61.9024
ENST00000396861	38.1964	40.7095	45.255	52.7033	69.812	82.9613	105.35	96.9504	82.1517	86.4973	61.2467	59.693	36.6326	28.0588
ENST00000261479	38.164	34.3086	34.7371	45.9024	45.2155	35.4972	50.7307	29.0236	41.659	53.7754	44.6116	31.6812	30.7335	44.1217
ENST00000339624	38.1363	9.03675	8.95989	14.7927	21.0273	16.3652	7.46876	31.6797	5.10837	6.78389	8.49671	46.7144	9.74157	13.0426
ENST00000022615	38.1277	39.4843	39.4291	41.1442	42.5421	36.8012	47.318	42.4208	35.9322	41.2308	41.0835	35.7475	39.212	26.4996
ENST00000302445	38.0906	22.8388	26.5086	25.8548	46.4998	30.8706	34.6689	41.117	40.5758	39.5034	33.0803	37.0697	31.9393	22.6024
ENST00000358278	38.0754	41.0651	49.0331	52.2274	85.9002	35.661	56.7978	38.7013	26.2783	30.7431	24.6189	53.2261	50.9335	20.476
ENST00000340990	38.0635	27.2808	27.8687	29.4228	31.1967	28.8289	32.3645	36.7531	33.2872	35.1925	33.193	36.452	32.3794	28.2241
ENST00000422318	38.0316	17.3926	16.2323	17.3557	17.9182	19.4844	32.3931	27.7224	16.3018	30.8629	14.425	12.9404	17.1237	11.467
ENST00000367048	38.0068	37.5037	38.811	40.3349	46.6979	35.7711	45.9017	41.1329	31.819	27.3191	23.6293	24.218	21.8481	17.3
ENST00000253023	37.983	35.1412	34.7368	37.0961	48.0076	43.0815	51.4061	42.2651	45.729	80.9775	63.6728	61.3738	46.541	43.2276
ENST00000300151	37.9413	47.8213	56.1412	55.1956	53.452	50.8248	38.3843	30.7426	43.5365	78.411	40.444	45.7418	41.3436	32.7243
ENST00000304992	37.912	4.72602	8.97549	7.29508	5.03035	5.89074	5.56176	9.29412	5.90127	13.7112	14.3469	5.63222	9.61161	3.57442
ENST00000299300	37.8178	44.8665	47.6364	26.7943	97.6616	27.2642	44.2428	28.0074	32.9331	36.3329	57.4267	20.8039	17.8276	14.1119
ENST00000366815	37.8003	13.8843	18.8612	25.1753	22.0178	17.7071	16.9949	25.9016	10.5002	75.4679	22.9533	59.4124	24.949	29.5625
ENST00000395535	37.7915	73.7788	66.5395	67.7543	65.1298	63.3576	72.7798	80.1319	68.8745	55.1449	58.0638	56.3312	57.1561	55.7979
ENST00000325327	37.728	8.84138	13.9413	13.8622	19.9764	17.2333	12.019	15.7774	10.9523	19.253	20.3512	12.4098	24.6872	8.93181
ENST00000227524	37.6978	8.39626	12.2939	11.7712	9.55649	10.5837	9.22966	12.6755	8.61686	21.5325	28.4147	14.9229	16.1251	10.1684
ENST00000373312	37.6933	43.01	64.5425	66.6854	74.1141	50.0329	35.4218	31.0649	28.4426	39.9015	47.3288	67.7359	65.4264	53.8822
ENST00000355653	37.6743	24.8191	30.2118	31.4209	32.1689	31.548	31.9789	34.1719	24.9711	35.2595	38.2597	37.0311	33.2488	35.8791
ENST00000489418	37.6446	14.3478	11.561	15.8311	27.5904	35.9987	15.1539	68.9282	40.6734	35.4363	41.2383	22.7205	39.2218	23.1875
ENST00000551018	37.6033	34.3127	36.6816	36.6862	73.7914	70.5897	83.4818	78.1294	69.8041	72.1622	62.0714	67.5775	53.0358	56.3952
ENST00000366988	37.5607	46.7929	48.2554	50.8144	60.4418	55.2444	66.1311	64.6997	66.3681	72.3757	63.7947	67.0966	52.3539	53.5517
ENST00000235835	37.5421	33.8682	33.1394	19.3651	23.2042	32.5288	61.332	30.7086	60.952	49.7481	37.0059	17.0766	30.513	27.2463
ENST00000326974	37.5334	44.0956	45.4197	48.5099	54.2661	52.7612	50.9791	40.3644	38.4032	58.0521	52.2752	52.6336	42.4583	38.4026
ENST00000398868	37.4593	15.1818	19.9989	21.8763	20.7261	20.1098	19.0567	20.0247	16.5355	21.7861	20.7161	14.5076	18.6869	12.4692
ENST00000348502	37.4132	27.9183	33.1232	33.6864	29.7905	27.6531	24.2662	22.306	15.3014	16.1832	24.7335	22.7154	23.899	21.4511
ENST00000559082	37.3896	23.8177	27.8945	36.4243	39.6643	29.2776	35.9504	33.8151	28.2052	26.5757	42.5755	29.2671	31.4536	18.5391
ENST00000420936	37.3755	31.1667	63.3976	63.2354	48.1114	69.2391	72.3193	70.3904	41.3949	43.2235	65.9362	36.6444	45.6219	49.1292
ENST00000354725	37.2786	20.824	27.6438	26.1572	34.0482	36.3891	35.1453	27.4988	19.8958	17.8765	16.3983	38.8741	37.7515	30.8348
ENST00000393766	37.2637	35.4083	45.2755	46.6525	29.6024	31.4891	29.6826	33.9916	29.3366	23.0378	21.9231	21.207	16.5191	21.308
ENST00000469584	37.2607	0.045635	30.1057	0.08546	24.0743	24.6365	26.3364	24.6993	0.192425	0.022037	0.050315	0.059589	0.008906	15.0204
ENST00000263694	37.2463	25.4447	22.2068	38.5559	50.4454	41.4259	31.6906	24.8116	31.3796	45.3538	40.5738	55.0203	34.1785	26.8867
ENST00000276062	37.2389	58.2806	54.1809	56.6847	65.1328	58.512	73.1009	72.4228	70.1034	69.4424	54.6887	65.8886	50.7974	52.2374
ENST00000367439	37.2275	45.1597	41.0122	43.3049	47.2474	36.5669	42.6914	4.72979	38.8338	47.4141	50.4442	44.3685	42.7075	26.8205
ENST00000359671	37.2021	19.6959	22.0407	16.9575	17.0526	14.1626	10.3519	14.3153	7.3344	12.4131	14.86	14.3869	24.1601	14.233
ENST00000296755	37.0883	8.13282	11.9873	9.6856	7.61817	8.27395	8.39847	9.26644	3.33864	6.08452	12.8229	9.66526	14.6216	7.01401
ENST00000426263	37.0452	12.118	20.6287	38.0487	27.4541	36.312	14.9737	13.064	9.64749	13.5244	9.56084	29.392	37.8131	17.8987
ENST00000636571	37.0188	0	0	0	0	33.4023	41.7954	0	24.5414	0	39.9447	0	0	48.3465
ENST00000503362	36.9958	27.086	31.9167	26.8539	22.5418	21.9973	19.3935	22.8562	18.5194	20.8464	16.706	20.7054	23.7019	19.3382
ENST00000366922	36.9443	18.8224	22.5278	22.5194	24.7222	24.7073	21.7861	19.5231	12.0357	13.2943	23.7087	19.5433	23.6371	17.4408
ENST00000414023	36.8974	32.9208	44.9431	40.6566	22.6966	32.2768	5.0048	15.5899	17.8928	18.3444	30.3618	14.3439	37.3393	19.2775
ENST00000313511	36.8216	17.5272	27.6289	24.3304	28.3392	22.8121	27.4348	24.485	26.3413	28.8717	30.0576	19.6497	29.8651	13.6824
ENST00000449683	36.7261	89.4782	52.8432	79.675	56.2567	69.3015	86.8362	81.9023	69.8862	59.1209	33.499	62.5516	52.5632	44.9073
ENST00000389805	36.723	27.4294	30.0505	33.4065	33.2218	34.0831	65.7531	32.8185	29.9239	57.4192	59.1977	36.5092	36.1849	30.6321
ENST00000366607	36.6811	22.0345	30.1055	29.5485	25.4779	23.3718	25.8702	31.3833	30.3347	40.7168	25.5545	20.31	23.6534	22.4327
ENST00000272102	36.6626	36.4216	27.1378	32.5782	29.2538	38.9377	24.7273	28.7912	28.6524	28.1317	27.6339	27.8912	31.548	37.1824
ENST00000338338	36.6093	40.3796	44.4303	50.9957	48.6653	44.7038	61.4739	54.8842	41.3704	55.494	45.6345	40.2034	37.7712	30.5801
ENST00000306749	36.5591	11.6174	18.6214	19.6929	21.2019	13.6406	13.8321	16.7556	9.73902	15.5481	17.6326	14.64	17.9303	8.75916
ENST00000491935	36.5431	27.1258	29.55	34.4521	45.4179	29.8678	44.6825	47.6973	48.5163	66.4397	56.3447	37.1554	44.4849	24.9896
ENST00000307630	36.5394	18.8668	26.3456	26.28	30.0082	26.3435	22.4097	29.7679	32.5163	47.9292	30.7811	25.3573	29.0845	22.5191
ENST00000261735	36.5293	75.3575	66.2586	60.6734	105.565	100.146	116.817	105.583	112.803	108.36	68.7022	107.385	82.3108	87.2467
ENST00000339600	36.4884	54.2664	46.9774	62.001	60.6422	45.9797	76.1849	76.8348	74.2182	70.1134	41.3377	55.5163	45.9009	51.7146
ENST00000322347	36.485	44.9862	46.296	48.0048	41.2113	39.8602	50.018	49.1474	36.4119	44.0452	37.1432	41.8426	35.3836	34.499
ENST00000496817	36.4848	58.7298	55.0222	62.1605	66.3398	75.6172	75.3246	70.3817	62.6032	61.4002	56.7362	93.0331	62.1142	71.2151
ENST00000338972	36.471	26.4531	29.8273	35.2853	40.2063	32.7146	28.632	19.093	24.9494	31.6104	0.591813	29.592	32.1473	22.9237
ENST00000381287	36.4436	26.1955	4.78989	11.8301	25.3567	24.1503	21.0551	24.8688	21.7645	4.65675	3.12181	30.3682	29.2554	9.35213
ENST00000396957	36.4345	40.6758	51.2938	9.45703	6.79751	14.6857	1.02102	11.7359	37.4279	9.76863	14.3559	1.79282	3.60968	5.38633
ENST00000458198	36.3337	39.1571	37.7584	39.213	43.0465	40.3222	55.837	54.2091	41.9705	40.2549	37.3123	44.7239	38.584	33.8035
ENST00000527446	36.1747	5.10692	19.0261	14.087	25.5024	8.76389	19.7822	17.4709	15.5208	45.5379	42.3525	35.9807	18.016	21.9967
ENST00000389131	36.1366	21.0007	25.676	26.7106	22.1296	22.7568	23.9427	24.57	9.83441	18.0051	14.6711	34.2522	40.0302	40.498
ENST00000421109	36.1255	16.5869	16.8912	13.4101	9.58513	10.9445	7.44603	7.887	10.6533	13.8722	16.6068	10.9272	18.7297	4.17227
ENST00000346178	36.0602	3.94382	7.78904	6.09744	5.5403	5.69808	5.99044	8.9366	5.60138	10.9684	13.4989	7.96028	15.9104	6.84499
ENST00000304434	36.06	10.7165	16.9738	13.8968	16.5143	18.7353	11.4034	10.0592	6.20577	9.80046	15.492	12.7114	14.294	11.9297
ENST00000303210	36.0483	39.6675	47.3428	47.4942	45.8953	43.7782	54.39	63.9364	37.0556	63.5342	57.0601	56.3141	40.4311	33.371
ENST00000416206	36.0117	42.4223	47.1724	0	42.964	45.3944	59.6404	63.1012	59.3058	47.4888	41.6948	45.4158	41.443	31.3261
ENST00000335698	35.9421	43.6027	44.7415	49.0323	48.9449	41.9506	49.94	54.7855	38.1732	37.5466	27.7182	52.513	46.8769	44.8953
ENST00000379757	35.9391	17.2332	21.939	20.4644	25.7535	20.8639	23.9376	25.7703	12.9493	28.6021	15.0024	19.4944	21.1297	18.6963
ENST00000274242	35.9329	57.0225	52.0434	48.6671	69.2742	58.2354	28.5396	90.4415	72.5149	19.9988	22.5777	24.6222	33.0632	21.9373
ENST00000339697	35.9025	13.0825	17.7595	17.4969	18.6911	18.0543	14.0794	19.4606	18.1867	24.6661	27.6727	20.4866	24.7103	22.4045
ENST00000559916	35.8784	63.6302	54.3648	88.0364	6.20592	93.0917	92.3315	10.8976	8.35672	126.505	9.87886	14.5535	13.4339	15.202
ENST00000368845	35.823	41.3434	42.0955	41.2386	38.8298	32.5775	21.176	14.9831	40.5674	42.0464	31.734	30.245	27.9913	23.9067
ENST00000530398	35.8172	33.1187	34.2419	24.0047	13.9	16.4801	21.9963	21.3018	17.7645	16.6196	16.4403	14.043	19.5007	21.7448
ENST00000296597	35.8093	23.7507	27.7338	27.2896	24.8314	22.5767	22.0158	20.4711	10.7397	7.81342	15.2586	22.1493	24.5446	15.2123
ENST00000256383	35.7817	43.148	46.3534	45.3858	36.5039	33.5656	44.8054	54.9785	55.9295	64.6678	42.9745	39.29	37.8313	30.0246
ENST00000354434	35.761	1.44181	18.7692	15.3094	12.3479	14.1627	16.1055	18.6032	9.41454	16.4982	22.3516	17.2964	19.7639	11.8701
ENST00000426677	35.694	31.5741	82.9637	47.0454	55.8256	60.4257	37.7796	30.5668	34.3922	57.7146	81.4086	38.8176	76.4494	17.353
ENST00000361367	35.6224	9.8202	15.3942	16.5471	17.8191	17.0896	12.2661	12.7942	9.68592	26.4883	30.7938	15.6401	21.1226	11.0136
ENST00000452248	35.5735	41.9179	44.6792	45.937	34.9644	39.914	47.8174	39.5227	33.2612	47.7038	44.6728	34.0113	35.7883	26.1211
ENST00000275517	35.5525	28.1336	26.1947	36.7775	33.9984	22.4498	3.2248	0.805556	63.0829	1.77566	0.664994	0.812526	29.1757	17.6664
ENST00000412051	35.55	25.3638	29.8281	30.6468	44.5929	46.3358	59.1334	51.3295	34.9821	34.1906	34.5847	33.4624	41.3332	29.1717
ENST00000304511	35.5338	39.9328	41.0876	45.2341	45.5174	43.3425	48.6992	34.1753	24.9212	31.2748	30.5819	37.9604	40.2743	33.8705
ENST00000303927	35.4502	42.0458	49.9714	56.9931	69.4314	48.2063	74.3578	68.4219	55.3466	63.4778	40.5351	47.2785	44.6738	34.5941
ENST00000254719	35.412	8.11331	10.5652	6.21098	7.34254	9.27312	8.53389	11.0154	6.56877	10.7288	11.6079	7.66288	14.8709	8.15497
ENST00000265970	35.4118	17.061	21.8114	20.9861	19.9224	18.2099	16.6748	14.3828	8.32014	15.0941	23.8629	17.6307	20.3147	15.3771
ENST00000646664	35.3422	39.5144	47.5609	58.7451	47.4686	69.216	53.0774	49.8558	35.4362	36.8046	22.1961	47.8062	47.0432	40.96
ENST00000315436	35.333	24.926	28.7979	27.9109	24.6602	22.0618	25.3377	27.0026	18.0477	19.1987	20.0671	22.8079	23.7987	17.9887
ENST00000455959	35.1782	54.5364	48.7435	50.7393	56.4051	53.186	56.7521	51.1447	49.1137	56.9996	52.2823	48.5611	49.9518	49.4352
ENST00000266085	35.157	38.3628	38.2289	31.7853	27.6593	22.4846	20.9992	20.7458	23.0458	30.9058	38.5055	53.7613	56.3962	48.1348
ENST00000220772	35.1157	32.8675	49.1807	45.2091	42.9042	36.4537	30.5376	31.2776	25.2557	26.9555	24.3401	54.8908	86.03	107.334
ENST00000454376	35.0892	14.0654	22.4664	54.1812	53.9801	19.0187	26.7505	46.4182	34.1459	23.4987	18.4547	13.1615	24.5473	16.4973
ENST00000395813	35.0702	19.1789	23.0819	21.088	17.9398	18.0721	18.6221	16.8544	10.8572	8.83112	19.0997	16.3205	2.06779	14.6963
ENST00000242465	35.0589	43.9201	53.0747	57.5727	57.3567	36.891	53.6277	55.7261	54.0996	47.6654	42.3096	63.2891	56.6074	68.7203
ENST00000342505	34.9969	20.5324	24.648	23.3087	27.1954	25.8703	21.6713	19.8593	10.9522	11.382	25.0468	21.4394	24.243	20.8149
ENST00000588234	34.9867	46.4323	50.5966	73.0437	69.6788	63.1471	75.4092	68.8342	61.5677	58.5239	46.9098	43.8274	53.1552	48.4219
ENST00000379715	34.9451	36.2527	42.6934	43.1353	41.8873	27.6584	30.053	25.3864	31.9725	37.4203	34.4574	40.7803	34.1641	24.4139
ENST00000379607	34.9402	30.5136	33.7388	35.1511	32.7229	26.1271	32.0304	34.652	30.5894	42.2309	28.7943	24.7448	27.3686	16.7931
ENST00000244711	34.9359	30.706	35.5031	33.2878	37.773	40.3192	58.7394	27.9763	45.2748	46.529	48.397	18.2464	41.467	29.2902
ENST00000261416	34.8664	29.1152	14.318	18.5114	22.4107	30.5807	30.0241	24.4172	15.6771	25.3841	18.3886	44.6438	40.124	47.5087
ENST00000237853	34.8351	21.004	23.0755	17.9009	14.4637	14.2994	8.95737	9.01546	10.058	14.9169	19.1654	17.6053	17.2097	14.8249
ENST00000337138	34.7396	31.8193	39.0631	40.9235	38.6835	26.7472	23.3962	21.819	20.8679	35.3372	42.1804	29.2427	31.2951	26.824
ENST00000296490	34.5466	27.4695	33.2137	32.6795	32.0801	26.0466	15.4567	31.8502	42.4697	60.1905	37.5554	26.0919	28.572	19.6396
ENST00000369144	34.541	12.0363	20.0716	19.6808	16.322	14.3414	9.80345	13.0513	12.0466	23.0146	25.8321	14.0744	20.1509	10.3625
ENST00000394673	34.5386	32.1942	42.9164	61.2424	50.1637	32.6042	26.4199	24.2318	38.6817	56.7138	42.7174	28.6853	34.3702	15.6398
ENST00000579248	34.5057	63.5843	48.7915	56.1975	74.1868	37.3872	88.2999	47.4604	46.3252	46.3278	50.7992	58.1121	43.292	45.0874
ENST00000374279	34.5011	36.0557	39.1435	41.0297	16.6789	16.9642	11.4717	13.6465	20.4286	9.34962	9.9437	30.7328	33.6863	40.7892
ENST00000354293	34.4723	17.7368	20.3481	17.9379	18.4332	18.1629	21.0683	10.4851	12.6281	19.4348	15.7911	18.0872	20.5812	15.6122
ENST00000370110	34.3569	48.5794	49.4581	52.1654	53.0194	43.4759	71.0788	64.6429	55.5688	59.2827	54.9461	53.0515	44.0706	31.6052
ENST00000251968	34.3362	21.2388	25.4257	25.8575	19.8924	24.9616	20.6102	15.5331	13.0987	22.4655	31.4274	23.9599	28.9697	20.7934
ENST00000256646	34.2646	8.71099	17.0824	15.3542	13.7174	13.3184	8.08623	9.48626	5.42233	9.81013	16.893	12.6042	20.0309	12.1846
ENST00000392222	34.2302	52.9975	75.9182	76.2908	60.7603	43.4541	87.9613	86.7243	91.3771	70.7903	26.1089	55.5723	60.9931	70.8756
ENST00000497965	34.068	0	99.3423	6.07495	0	0	128.694	8.75795	134.181	25.5846	47.1738	8.63409	43.6046	13.9176
ENST00000344726	34.0669	49.4728	47.4918	50.9655	61.6001	52.9164	59.5371	52.5597	41.7808	37.4558	35.6139	46.2878	46.4928	30.697
ENST00000397261	34.0422	36.4783	40.8117	41.8788	45.5948	38.9486	43.1904	48.0526	13.0959	45.9368	41.3172	40.2219	41.617	32.2632
ENST00000392221	33.9956	69.4094	30.9915	32.0276	47.3522	49.7335	62.9287	55.6118	46.2872	52.9455	37.4206	29.8382	26.7652	21.349
ENST00000371429	33.9836	24.9328	34.2915	39.3868	38.2942	32.4277	22.678	19.1664	16.6154	22.8006	29.1541	25.7855	31.4094	22.6652
ENST00000568865	33.9533	3.96318	8.28516	8.18696	15.07	9.34957	16.2508	23.1123	13.3017	16.3638	8.06213	11.325	4.39495	4.58551
ENST00000432648	33.9208	27.7942	31.3118	21.7981	37.6253	31.0378	17.29	39.4607	29.1779	60.5698	50.3383	26.327	37.1239	18.0369
ENST00000345146	33.9101	7.92038	4.89978	7.5392	12.4995	7.64428	7.00898	10.3755	4.49604	5.24932	4.4377	4.40964	4.02473	2.49356
ENST00000306024	33.9049	45.4514	43.6668	44.6916	49.7798	41.7109	60.6652	59.9816	54.5347	54.496	48.7688	46.6141	40.7852	38.4782
ENST00000369026	33.9005	20.9905	28.7282	26.9615	26.6911	27.2692	18.4708	43.2613	39.5285	48.398	49.6512	34.4823	34.6994	26.1552
ENST00000217426	33.8984	26.8469	33.0919	33.1391	28.1588	23.3229	35.7207	34.0519	25.7699	33.7997	22.9075	27.0506	33.8201	23.254
ENST00000315323	33.8733	13.8277	23.1348	31.2453	36.2692	35.3915	14.9242	15.3885	19.3128	35.0143	20.0532	21.4257	29.6743	20.859
ENST00000361564	33.8685	41.0642	46.5008	91.1622	59.011	75.7554	46.6938	50.3864	48.7217	52.3815	47.4143	62.038	49.3545	81.2861
ENST00000378204	33.8653	36.0023	49.4698	39.9699	44.6549	36.1604	19.3555	10.7659	6.51649	12.6849	27.4149	40.216	32.7426	28.4671
ENST00000378512	33.8529	31.8528	36.9595	36.2193	43.8175	36.6118	50.1673	47.7484	51.7786	64.0899	43.9951	40.8156	39.7939	29.3205
ENST00000368884	33.8344	17.4765	31.4348	19.294	25.0712	19.9667	21.587	22.3759	17.6022	20.6666	31.3438	18.7275	23.532	14.8688
ENST00000362034	33.8292	43.9191	47.3643	50.4089	69.5574	46.4366	57.6637	50.3778	30.7758	46.7476	53.8195	42.8214	49.427	37.4501
ENST00000222005	33.8247	39.581	46.8517	38.1311	65.9024	49.5765	66.2577	65.477	46.1393	69.5939	46.0317	53.5323	59.0392	38.7703
ENST00000379982	33.8224	13.8421	17.4925	13.2458	9.63368	15.1457	11.6437	13.117	7.33101	9.92099	13.9564	9.70585	12.364	9.08075
ENST00000521604	33.7647	33.888	10.6016	35.5441	51.9161	15.185	22.0484	26.7571	19.3102	10.6675	11.1094	28.3114	24.4829	11.8103
ENST00000166345	33.7054	14.6541	24.4388	23.0755	19.0072	15.3486	13.9403	16.6506	12.8234	18.1754	19.8502	15.4965	21.1887	11.1248
ENST00000453788	33.69	11.1899	110.568	9.85466	149.458	91.3551	91.5915	65.0013	56.737	172.125	84.5517	77.4483	28.1632	15.0156
ENST00000372759	33.6577	25.8609	32.1527	34.7688	33.8634	25.4591	26.3365	27.6034	22.639	28.2569	32.7667	25.0684	26.6518	13.6202
ENST00000369535	33.6429	29.0669	37.5733	36.9899	28.3678	26.1607	25.3822	27.8209	26.0165	33.0916	27.5613	22.0626	27.5743	18.1481
ENST00000270221	33.6396	39.0128	58.7677	51.6421	58.1471	35.5447	57.6659	71.2953	54.2214	56.0544	80.9121	49.4998	46.7392	28.3606
ENST00000582743	33.6294	63.6677	59.7159	49.0628	93.6299	67.789	45.4567	100.175	93.4538	115.645	39.9258	88.6603	54.6987	87.9375
ENST00000339157	33.5582	34.0376	22.6031	37.1591	40.6367	23.1196	43.9824	40.0887	29.6234	31.6048	35.5494	41.7183	46.2602	48.9141
ENST00000265112	33.554	23.7077	38.6683	16.8215	20.883	26.6047	19.5775	8.64065	8.1114	48.9829	26.0369	7.62969	37.1419	14.1786
ENST00000392415	33.5501	9.06032	3.92249	5.14316	9.3743	0.325164	4.36117	6.4772	0.059053	2.07178	0.360849	7.54768	3.50169	7.63939
ENST00000391753	33.547	17.4403	29.7314	16.4045	32.8304	25.2971	29.8566	31.0578	27.7129	27.457	36.6976	21.3839	79.8554	23.1238
ENST00000261622	33.5379	14.4793	23.5016	18.0488	16.5369	17.4768	10.5358	17.0425	12.149	15.8208	12.0175	12.0137	19.0797	6.39535
ENST00000613659	33.5043	40.1639	34.7973	12.3796	24.2294	21.2998	10.1082	57.1221	57.1531	52.0415	49.0733	9.53535	30.8044	26.5633
ENST00000360876	33.5012	22.5933	28.4595	27.6473	31.9937	23.4191	24.3894	27.0638	28.822	38.4808	38.2214	26.5198	27.4472	17.8236
ENST00000304636	33.4681	18.8477	19.7569	17.6498	26.3997	36.0539	17.5688	17.9385	12.2292	18.5763	18.3852	22.0277	29.1527	22.344
ENST00000296122	33.4456	13.1651	6.61118	15.8218	6.72958	17.0702	5.75409	26.9629	2.25711	24.7116	14.3487	6.06463	14.8039	12.0898
ENST00000231238	33.4051	39.702	31.5494	36.8744	40.1917	46.8453	33.7748	25.6732	24.3113	46.5527	50.3397	34.467	34.9591	35.3881
ENST00000303731	33.3488	25.0645	33.9767	35.5438	29.5297	30.5756	34.1206	43.1932	25.6982	36.9844	31.9144	36.1473	33.8065	31.3579
ENST00000266732	33.3117	26.6276	32.5622	38.3425	34.8745	27.8593	24.8869	35.1467	38.9508	51.4714	35.4088	19.9911	24.9128	14.3001
ENST00000276569	33.3053	29.3361	38.7084	41.8922	33.1511	35.5162	25.003	21.7152	27.823	36.6795	29.2168	26.9771	29.1981	23.808
ENST00000265304	33.271	62.8187	61.791	64.4158	68.7404	52.3133	68.2426	61.9354	58.0918	57.2341	50.696	46.8679	52.7965	38.9737
ENST00000369980	33.2495	27.5255	31.1983	36.4056	34.6608	23.2803	55.3993	42.9097	30.3832	41.281	35.7906	35.4575	37.5159	20.1145
ENST00000355937	33.2301	44.376	44.372	46.7716	41.997	35.6993	39.7423	36.9941	32.768	32.6445	35.4605	40.6548	33.964	34.0149
ENST00000265896	33.1987	24.7871	37.8487	38.9899	21.5732	18.8709	15.5696	14.0253	18.972	27.5514	25.4287	18.5413	16.5702	14.6369
ENST00000417647	33.195	21.8651	19.4568	23.3819	32.8543	31.2667	27.9443	27.9116	18.9655	31.3806	36.1192	21.341	25.4343	18.7903
ENST00000302190	33.1942	35.9589	29.1644	27.3209	32.9409	36.4864	36.0769	30.4875	22.696	21.592	25.0942	32.5356	28.4799	26.9684
ENST00000356674	33.1538	3.42459	5.2678	4.15556	3.19831	2.92877	4.80102	6.82474	1.28712	3.449	5.86776	1.51642	4.63926	2.31398
ENST00000367600	33.0449	37.5522	40.8012	36.1212	35.159	35.2936	42.344	39.3103	30.9086	44.785	34.8236	44.7169	42.3152	49.5047
ENST00000376901	33.0299	31.9655	42.4769	42.143	42.6783	35.6588	52.9485	54.961	50.9562	61.3595	47.9164	39.3664	38.5944	37.0308
ENST00000534510	32.9527	9.73439	15.5659	16.3076	16.9753	19.8477	15.0271	21.2527	13.8763	24.7719	28.349	24.4443	27.5097	27.9509
ENST00000366560	32.9493	41.5006	44.1018	41.0048	38.726	30.6537	38.3905	34.1314	31.3221	31.7955	29.4465	26.9438	27.3812	21.5737
ENST00000426559	32.8036	23.1128	41.9554	49.7882	46.2681	46.8948	32.6096	58.8567	57.175	59.3185	17.2979	32.7793	40.1733	43.5125
ENST00000259632	32.7977	58.0128	61.5653	66.5761	60.0315	60.4287	73.1432	52.3261	48.0857	49.9925	47.0303	47.3302	32.4604	51.1308
ENST00000380752	32.7646	7.77665	11.5091	9.19196	7.74729	8.41406	6.90017	8.62571	6.28649	11.1188	14.3025	10.4197	15.7428	6.074
ENST00000344034	32.7357	12.7872	18.5264	12.5068	22.765	15.2931	16.1531	22.1904	18.052	26.0492	22.848	17.7165	23.3733	13.8242
ENST00000356530	32.7306	257.005	101	54.5192	89.9906	92.7229	52.23	39.6959	66.9013	100.243	47.5493	61.8833	57.2006	42.388
ENST00000395314	32.7257	18.5727	17.9594	19.7536	19.0257	21.5849	13.7644	16.2691	12.5696	10.4372	16.939	18.6158	19.3736	16.5377
ENST00000332859	32.6909	32.8143	39.0651	42.505	41.4492	30.1638	41.8041	38.7351	28.9069	36.3418	27.7669	27.8723	32.6389	23.8018
ENST00000268379	32.6667	35.3272	38.8368	39.4872	38.3606	37.996	39.0802	37.4819	30.8524	30.7639	31.9022	34.688	29.7278	34.1125
ENST00000253794	32.6658	33.9616	41.7825	33.2741	27.953	29.1476	35.3734	32.674	30.5883	43.5652	30.4762	31.66	32.1632	24.0121
ENST00000328434	32.6558	30.2559	36.5842	35.3324	44.5047	43.1231	46.318	40.3095	35.3306	37.7513	28.1211	38.5934	37.6626	29.1313
ENST00000380283	32.5839	41.2414	29.8612	39.3109	43.5237	39.4784	11.8854	26.5156	40.6718	33.4148	30.336	16.4397	38.5665	36.7389
ENST00000231498	32.5699	19.581	22.4342	20.9879	19.8362	17.1595	16.5828	14.1662	11.3398	18.3697	20.3133	17.2216	19.4711	13.1436
ENST00000424325	32.551	35.7485	43.6477	47.2176	44.8468	34.7834	53.9985	51.3386	41.7597	52.4264	65.0959	35.6889	49.2925	57.239
ENST00000356708	32.5232	28.7715	34.1926	32.822	39.8452	43.9553	43.4388	3.96624	3.75198	1.84693	33.0826	15.4665	23.0677	8.7703
ENST00000259339	32.5131	28.2461	28.9403	29.2797	31.3459	27.5815	37.1156	43.4185	41.0964	51.7665	32.0826	28.1342	28.2714	20.6963
ENST00000367034	32.5055	29.4265	33.3209	16.9541	34.5651	34.0528	33.9406	16.4608	25.9572	37.2565	29.7278	33.2935	32.0999	27.4526
ENST00000647448	32.4805	36.2223	41.5076	45.5797	32.5064	40.3538	41.5696	31.5175	41.6969	51.8078	46.4124	40.4808	37.6511	52.8407
ENST00000611688	32.4567	45.5322	49.1435	52.9619	52.3551	41.42	58.3411	59.6627	49.5507	58.4727	47.4543	42.8341	39.7203	31.8815
ENST00000266659	32.4418	30.3959	32.5288	27.9104	21.0187	18.6703	26.6195	25.5565	20.2034	19.5796	12.4627	29.0683	28.3522	25.6332
ENST00000306368	32.421	38.4266	42.9543	40.4069	53.4522	53.2437	66.6127	9.97063	64.9781	59.3547	53.4296	60.8474	47.454	56.2073
ENST00000607003	32.4089	49.2003	32.7057	53.2642	47.5773	17.3533	56.4662	28.1325	49.2882	32.1778	25.2835	40.3229	41.6905	37.544
ENST00000534585	32.3352	22.1286	27.0642	34.7067	39.71	36.7328	27.0573	32.2067	33.3138	49.7206	39.1327	33.9571	34.6419	25.3498
ENST00000303575	32.3129	31.7281	26.0274	30.8918	32.3291	26.9859	26.1706	27.7879	21.6078	35.5836	22.1117	25.4013	28.9436	27.4724
ENST00000372224	32.3075	17.7736	45.5722	65.0863	19.233	46.8269	6.49449	19.5806	24.9673	46.679	71.4429	31.4444	40.6031	11.3653
ENST00000223215	32.3064	26.103	27.8823	32.892	42.4612	33.8489	24.205	21.0172	26.7427	34.0896	47.4392	29.0506	21.5548	27.1086
ENST00000351698	32.3017	29.8073	34.6499	33.5177	29.6954	26.6031	31.0893	36.1062	33.8864	46.6842	34.5544	30.4935	33.5039	17.4644
ENST00000264255	32.278	14.0137	20.7263	23.3659	18.7947	17.8854	14.4004	18.2252	15.9471	22.065	20.4726	13.9347	18.0537	10.8096
ENST00000320560	32.1798	17.5399	18.3414	15.825	18.009	22.1359	17.0254	14.6008	6.0995	5.54623	14.4377	16.3657	16.1915	17.1376
ENST00000271628	32.1757	9.08234	12.2324	13.1326	10.3098	8.69784	14.5422	21.251	14.5949	29.4562	24.3268	11.1157	17.2654	6.01705
ENST00000256545	32.1683	9.10918	14.5965	13.2759	8.89452	8.53237	10.2065	16.3162	10.7068	17.3411	24.5354	13.3462	17.8312	9.05232
ENST00000398733	32.163	27.4266	34.1789	33.906	31.9718	30.2798	25.6767	17.1881	21.8812	30.0306	31.362	32.7181	32.4031	27.1427
ENST00000279839	32.1607	27.5426	37.4366	32.0257	37.9325	33.2146	37.3025	25.1543	32.9836	38.8156	40.9706	30.768	32.5303	25.3859
ENST00000265070	32.1361	28.1253	31.0905	32.0494	31.2621	29.263	14.1534	11.0452	21.5461	36.5338	32.54	34.3207	33.8509	27.9151
ENST00000262948	32.1265	24.1929	23.3214	25.7806	31.1297	27.9561	18.9596	15.6066	9.6875	21.177	31.2805	34.6295	30.8856	28.6236
ENST00000331334	32.1205	33.0084	38.4928	38.1953	50.842	43.3152	43.3565	44.1866	41.4236	47.7536	39.0025	43.7782	35.5784	31.739
ENST00000262646	32.119	28.5454	31.6274	33.3545	33.4956	29.6863	25.3521	15.8204	11.3505	19.2285	27.4139	28.517	30.1413	27.2474
ENST00000343380	32.081	17.6079	10.3514	9.00544	22.145	18.6025	36.8957	37.0736	29.9327	31.4153	23.2728	29.4076	22.7925	20.6493
ENST00000286953	32.0775	73.2724	61.6749	89.4367	107.424	85.6305	111.641	106.986	99.2859	94.2222	69.1525	65.1632	50.2915	55.8715
ENST00000375663	32.0279	12.5625	18.0273	17.503	19.0866	14.9586	18.4885	19.1372	11.5883	15.1134	20.1585	18.7623	20.7969	9.59271
ENST00000264108	31.9705	34.5085	30.6066	26.0014	30.2077	19.764	38.1199	31.4028	13.7328	23.5	13.1172	23.0219	28.8659	23.7149
ENST00000389231	31.9275	12.36	17.1409	16.375	20.4979	16.9435	19.3783	20.5325	15.123	19.6541	21.3883	12.7512	18.163	9.19183
ENST00000277010	31.9226	24.0464	31.0468	31.8683	33.1392	27.8388	37.1277	43.6792	33.3482	45.3587	33.0065	35.2505	35.471	26.3129
ENST00000330398	31.8978	8.34382	11.186	18.6158	12.1253	14.9745	12.0111	19.198	7.78556	22.3483	17.3604	11.8561	20.3545	9.81809
ENST00000579755	31.8753	56.197	39.6409	62.039	46.1904	40.1016	26.4685	53.0466	31.436	56.346	27.0939	34.9689	43.3932	64.2804
ENST00000370768	31.857	18.1104	21.5922	28.6081	29.2628	23.1036	15.5275	12.5389	10.0816	17.7335	25.5109	16.0927	25.9174	11.8248
ENST00000623761	31.8567	19.188	25.2836	26.7943	27.6332	23.9752	30.8198	33.9314	23.7612	32.5319	32.5834	21.7753	21.5921	14.723
ENST00000392994	31.8112	61.406	54.7882	77.6909	129.639	84.1191	141.967	120.765	120.318	179.038	100.458	129.484	55.1863	62.3934
ENST00000395718	31.7935	48.5068	41.946	32.1997	42.8194	33.5918	9.41761	11.3893	19.5779	17.7072	21.2596	17.0124	21.0898	17.6638
ENST00000598188	31.7627	29.224	33.4802	33.7001	30.4658	30.4958	38.7608	38.3004	27.0102	27.0735	30.1258	28.9543	30.1375	24.4875
ENST00000594797	31.7528	93.9677	76.5728	70.3382	73.9966	80.5314	105.453	95.9269	96.8064	79.7686	57.4274	66.2903	50.5932	67.8563
ENST00000264156	31.7285	14.0682	9.90363	8.88203	15.5369	17.5452	20.083	18.0182	9.5322	12.7379	12.4078	15.6165	16.914	14.4179
ENST00000216034	31.7061	30.2763	32.4589	33.1593	47.7917	38.5922	51.8679	51.9564	44.8078	50.2173	39.3657	34.0472	33.5073	24.9414
ENST00000353196	31.6403	7.85929	13.1099	15.7693	15.2147	6.82653	7.78195	12.3477	1.71194	10.1973	14.0074	7.60311	16.4753	6.57887
ENST00000272233	31.5999	45.2302	26.5702	24.7779	29.8038	33.623	59.1656	49.2034	32.3609	37.1399	30.7095	23.5321	20.3451	15.6862
ENST00000250498	31.5848	36.0937	29.2373	29.9554	46.0225	47.2952	46.3389	50.6583	45.8708	51.1395	39.5123	53.6249	31.0439	36.0564
ENST00000247665	31.5202	30.8083	36.4412	37.5989	40.6865	43.6084	44.8306	45.6342	47.5525	55.0309	41.4451	38.9779	39.2579	37.9028
ENST00000182527	31.5138	10.2076	18.619	14.0774	13.3167	12.9591	6.75825	6.54648	6.26625	11.3259	15.7748	12.4402	18.1907	8.52213
ENST00000377575	31.4928	30.423	31.4282	31.388	32.569	34.7332	33.0825	33.6785	36.2636	40.0206	24.5236	32.7517	27.2833	34.8575
ENST00000320027	31.481	12.6663	18.8808	18.2999	22.6521	15.3229	14.8577	18.8994	10.8151	18.665	25.2369	14.8168	21.1017	8.15083
ENST00000304494	31.422	24.9914	52.428	41.8012	33.0023	57.0469	15.1834	35.1456	16.4207	37.4368	45.9578	15.4874	59.3418	46.5134
ENST00000323441	31.3607	23.154	28.3713	28.3364	18.9976	13.2627	12.5703	13.3677	12.385	2.53579	2.2688	13.0006	17.4663	13.2763
ENST00000348165	31.3293	14.5645	20.7197	18.6549	18.8051	15.8568	15.4698	12.5367	9.25063	15.4103	20.9765	16.2763	19.0443	12.1163
ENST00000379160	31.3052	20.8689	23.2149	20.3585	23.2351	22.3547	23.0257	19.5317	21.2477	25.846	15.1258	16.5587	28.3143	21.5107
ENST00000194214	31.2908	47.1203	41.4872	42.3732	40.6601	40.4588	64.6351	54.86	46.4317	43.3923	43.4933	43.575	39.3107	41.2911
ENST00000239944	31.2888	29.911	34.1165	36.8893	38.6637	31.407	38.0342	41.7863	41.6915	47.9224	35.9707	38.0782	36.5344	31.9712
ENST00000381359	31.2803	115.022	74.3571	31.9437	38.3119	31.5272	113.94	58.8153	106.328	38.3295	48.8601	95.276	54.8917	96.3229
ENST00000273308	31.2778	27.6669	22.9316	32.5303	32.7459	27.819	36.5293	39.1738	37.9444	56.9223	35.3636	37.7964	32.6722	26.176
ENST00000389266	31.2669	19.0302	23.6233	22.068	22.1268	29.4692	21.1684	16.97	12.3244	17.2861	21.7408	26.0104	22.1895	16.2788
ENST00000245857	31.2615	35.9381	21.8719	30.1999	0	46.4748	27.4077	29.0475	40.3685	24.6449	4.11752	8.19167	36.6353	41.9415
ENST00000367287	31.2301	27.6731	34.8403	31.9732	34.3687	25.6907	33.0043	31.2467	39.0332	41.2041	31.8013	27.7555	29.0254	21.3508
ENST00000319211	31.2192	15.6326	17.3103	15.4502	14.3709	20.8318	14.2388	15.7431	10.0418	11.456	12.0894	13.3432	15.64	20.6647
ENST00000222008	31.1606	50.1164	53.1459	70.4018	77.0958	60.4235	76.4332	69.7785	59.5387	83.3657	61.9317	76.8058	58.6906	63.1497
ENST00000380591	31.1382	27.4005	34.9234	33.4504	41.8636	23.0443	26.0661	46.0149	46.0338	55.4452	27.9064	24.2167	34.6219	27.2134
ENST00000528957	31.1166	12.9489	8.3379	16.4778	22.8006	30.4864	12.3387	14.5696	10.9975	29.3792	11.7008	36.9035	27.7134	21.6561
ENST00000380876	31.114	12.1685	16.2163	16.8328	15.2525	15.7895	20.3121	20.0363	10.0279	19.666	18.5635	17.8468	24.3113	11.019
ENST00000278618	31.1116	25.0405	35.137	40.2536	38.7211	28.0043	24.0524	31.0108	34.9014	37.8823	37.8859	32.4268	35.7323	25.5215
ENST00000531743	31.0765	122.803	116.559	88.4392	33.8534	29.6792	49.8707	52.5007	39.8019	33.0954	35.8046	28.0231	69.6881	44.8762
ENST00000443024	31.0619	15.492	27.6787	19.6814	19.8329	27.6708	16.7148	22.4118	15.4674	12.4901	20.6066	23.8087	22.4522	19.1673
ENST00000371663	30.9959	18.0082	21.3371	19.7455	22.3033	19.8143	26.654	26.0992	18.9919	25.9589	17.6285	21.9617	25.0735	16.1825
ENST00000331134	30.955	21.2558	23.7725	22.7375	23.7353	20.8718	30.3838	17.4007	14.6257	29.0677	22.8478	23.8391	29.175	15.9597
ENST00000366663	30.9411	22.8608	20.4417	16.34	4.7e-05	9.6e-05	15.6843	20.58	14.484	25.7466	20.1015	2e-06	2.6e-05	12.0114
ENST00000248975	30.905	12.7977	22.062	19.457	17.998	20.8114	14.474	20.2298	24.5599	30.472	18.7267	17.6787	21.3377	14.4766
ENST00000251496	30.9038	22.1264	30.9104	39.8412	32.1114	33.0525	8.45602	16.5713	17.1856	23.5292	37.7622	21.6456	29.2386	23.4253
ENST00000310653	30.8938	12.9439	13.7935	18.0879	16.64	11.2925	15.6531	13.0321	8.95213	13.4141	20.1841	16.0024	21.4964	17.0036
ENST00000263277	30.8806	3.64521	4.83437	4.26066	4.56811	5.31267	4.88207	6.74387	4.09789	7.23771	10.9854	5.96562	12.9522	4.42318
ENST00000168216	30.8145	43.2635	43.3687	48.5054	59.7244	49.1552	56.3225	48.3857	40.6418	44.0202	42.3854	44.7461	41.5709	29.1156
ENST00000263238	30.7595	19.6012	22.6503	14.2	16.3957	22.8267	14.0381	12.0161	7.04692	11.0892	13.989	15.138	15.8813	15.7397
ENST00000618014	30.7533	21.1068	45.7713	58.4935	38.6288	39.278	20.1724	24.3977	35.6895	50.3931	33.4161	24.6483	32.7664	20.3456
ENST00000615550	30.7258	23.5936	24.9039	25.4918	25.4597	27.238	24.5783	16.7139	8.83095	8.43939	18.6264	30.359	31.7047	28.8521
ENST00000374358	30.7195	13.4864	18.6525	19.236	19.2283	17.1494	16.9987	19.5948	12.016	22.2291	24.7089	19.5955	19.616	14.6402
ENST00000330720	30.6394	26.1944	26.3845	30.2843	12.2839	28.1148	34.7335	34.0259	20.8321	13.1116	37.2003	32.3147	27.443	27.7217
ENST00000373237	30.6119	14.0622	26.3136	26.3031	22.1787	11.7346	26.2088	26.3722	16.2783	23.7626	26.6627	24.1371	26.5806	17.349
ENST00000409477	30.6054	27.7377	27.984	29.3861	42.9028	36.6668	47.8334	44.3056	41.1001	51.6001	41.2508	38.5558	39.4468	23.2474
ENST00000383657	30.5248	9.36366	13.3068	13.4325	13.4104	13.8626	11.1103	13.723	8.93055	14.3117	17.949	9.08271	12.1697	7.03205
ENST00000375749	30.5162	15.5856	19.1576	18.0364	20.7351	18.0298	21.9294	22.47	18.3478	22.9375	17.6782	20.1301	23.5818	15.7436
ENST00000333449	30.4605	30.3825	36.258	33.8927	45.5045	40.576	49.0204	47.6012	42.2854	53.8439	50.0167	50.6539	35.0516	33.438
ENST00000360541	30.456	38.4411	44.1823	49.0739	52.8178	30.8194	33.4725	31.1366	32.1443	51.7149	42.9794	38.8715	33.981	24.4631
ENST00000273968	30.4444	30.3207	34.1145	35.3211	30.9409	30.453	34.7667	35.4368	33.0987	41.0946	29.6767	28.566	26.4971	24.8851
ENST00000375436	30.4384	32.2641	40.2221	37.7985	40.9157	34.7742	21.4508	22.9667	32.5227	52.0384	37.1456	40.6755	41.6774	29.3243
ENST00000407327	30.399	9.39656	13.6465	12.8733	11.4039	12.6312	10.6188	14.6338	8.20409	14.35	14.0326	6.80886	11.4992	9.21562
ENST00000368076	30.3733	0.011681	3.47336	0.006981	3.38779	0.022067	0.272466	15.5619	3.29239	2.42948	4.40315	0.013111	0.727416	0.008967
ENST00000361189	30.3594	15.5162	14.1366	13.7896	15.4313	19.9898	15.33	11.9108	6.36635	10.3663	19.2766	17.4599	20.155	20.8929
ENST00000302418	30.3473	7.81492	15.4058	16.3764	14.3714	14.4379	7.73073	10.3073	8.3795	16.3315	18.4376	8.18482	12.7795	6.37645
ENST00000264710	30.3452	9.89082	16.6578	16.2372	11.464	12.4487	9.10424	9.54711	5.72328	8.87722	15.0968	9.20022	14.4064	7.45833
ENST00000392318	30.2846	24.5716	26.4501	23.9128	30.0022	18.9332	21.0213	11.8433	8.19024	7.48427	29.7267	29.9263	7.54035	20.0462
ENST00000368547	30.2684	21.4535	24.6726	23.0365	28.8966	25.9739	28.4589	28.3336	28.8035	28.3089	29.3358	20.5348	27.3193	20.5144
ENST00000377351	30.2449	8.80451	10.8136	11.7417	11.7189	11.056	11.2028	12.8724	9.18506	14.9345	18.8009	14.2365	15.7355	9.07149
ENST00000392396	30.2425	21.2273	30.887	13.1906	25.6927	20.0795	19.8614	10.2864	23.9397	15.9052	9.29665	21.951	17.1693	3.28019
ENST00000265465	30.2393	14.0755	13.6873	10.9273	14.5541	14.851	20.734	17.8315	16.871	26.245	18.8949	18.5549	20.4582	13.124
ENST00000409683	30.237	0	37.6975	62.8006	13.7388	86.4216	0	92.4772	98.7327	123.177	21.2512	0	66.7701	18.2969
ENST00000435046	30.2254	8.06943	12.8938	12.3103	15.9729	14.5294	13.4413	15.2506	11.7471	21.6246	20.2738	16.075	22.0612	10.2426
ENST00000444449	30.2081	23.732	29.8377	30.3544	25.5436	26.7676	0.79951	28.0765	0.064597	33.8019	28.976	27.3577	24.897	20.3437
ENST00000327772	30.1907	35.0745	33.0687	33.2734	45.3182	48.1713	52.5401	36.9361	35.8073	39.1475	38.9238	29.5727	38.9741	30.5575
ENST00000381989	30.1869	10.1867	12.3685	12.3856	14.3265	16.1889	13.7847	11.1686	6.66005	8.28011	17.4223	13.8799	17.3484	11.0372
ENST00000546392	30.1759	203.187	50.547	114.306	199.349	29.7007	38.5775	42.8746	52.7749	164.201	35.5356	161.247	62.8278	108.507
ENST00000493945	30.1751	2.70203	3.81375	2.5081	3.46794	15.9081	4.33374	10.2504	3.49854	3.15554	1.37951	2.57912	4.3491	1.71271
ENST00000493678	30.0873	18.3557	32.8777	33.9257	27.1166	7.36377	37.5714	31.9518	30.6667	22.9899	32.3708	29.1061	32.0162	21.673
ENST00000376572	30.0692	27.7912	30.5524	32.2678	33.1556	29.4446	30.0494	36.2719	33.4209	45.899	31.8477	33.0498	32.9751	25.6157
ENST00000369850	30.0605	2.66354	2.24672	1.6231	0.283902	0.262672	0.221843	0.232719	1.42403	0.220915	2.82989	2.06071	8.11689	0.215777
ENST00000288398	30.0587	77.8434	63.8213	74.1239	79.3767	66.9732	84.9169	68.4193	59.8831	44.074	37.634	45.3517	66.8624	28.1465
ENST00000373625	30.0299	7.772	18.3011	13.5573	11.0537	9.58321	7.65026	9.7207	9.78478	9.58402	13.2032	9.59611	12.0235	11.8373
ENST00000361813	30.0065	17.5574	23.2445	26.0226	23.8539	22.0188	25.5948	20.7412	23.0835	37.586	21.7314	21.9738	23.8938	13.4176
ENST00000302516	30.0039	7.87388	13.9665	12.213	18.4758	16.8945	12.2818	12.9473	10.359	16.3249	23.8905	14.1471	19.9681	10.715
ENST00000392246	29.9717	22.8612	25.9476	25.2694	25.0466	23.6254	18.0584	22.9415	17.0777	20.0417	23.6152	21.1918	19.9562	19.035
ENST00000340093	29.9649	63.0292	59.4063	47.9159	36.9886	26.2143	37.3712	51.8721	56.973	55.4371	30.4293	54.1861	44.4994	36.3136
ENST00000218388	29.9592	7.83363	13.5123	7.88666	19.3669	17.2148	24.3628	36.205	28.4628	21.7597	22.3625	31.2196	27.3845	35.2148
ENST00000592576	29.9452	0	30.0142	15.0539	31.6958	9.53284	25.1319	21.7021	10.5726	29.4214	18.9557	1.36266	17.8064	1.56962
ENST00000618852	29.9436	5.17355	7.32007	7.26934	6.54383	6.85181	6.42608	6.42437	3.85212	9.15356	13.9456	7.36006	13.3416	5.93582
ENST00000278671	29.9425	42.5268	44.9378	43.7539	40.832	43.3042	119.47	42.3416	29.5077	45.1531	104.854	41.1285	119.052	33.484
ENST00000392776	29.9392	28.5104	30.331	31.7639	33.0312	32.6132	39.193	33.7379	32.9817	41.4031	31.1964	32.7596	27.1474	26.7166
ENST00000337198	29.9387	26.6492	26.7408	21.6992	20.1265	23.8191	17.3564	14.6897	17.7255	24.1257	22.7182	20.4573	19.6786	17.3072
ENST00000378853	29.9257	45.9519	47.3255	52.9587	55.7495	45.6719	60.5171	64.258	52.7119	60.0262	43.2481	46.504	38.5774	32.6629
ENST00000369722	29.8974	89.8672	90.0104	102.365	82.1297	37.6382	43.1733	91.8818	66.9654	65.1855	67.4363	52	29.958	45.0555
ENST00000357103	29.8691	5.67077	9.2364	8.22672	8.43719	9.66436	5.54462	5.54012	5.25332	12.5986	17.1825	8.39117	12.7977	6.23972
ENST00000341369	29.8555	22.4454	34.8575	24.5741	28.2043	40.3673	46.2395	29.8657	28.7594	31.3792	17.1308	18.2794	39.3107	24.2395
ENST00000588734	29.8352	22.2623	23.9727	20.1741	28.3735	28.8861	9.87063	29.0344	23.6679	25.8677	30.4875	24.2359	20.5357	16.364
ENST00000649764	29.7398	7.29323	14.6442	13.8333	12.3354	9.54866	8.70547	16.7588	15.1307	25.6062	19.6725	7.09506	12.9044	4.67862
ENST00000361804	29.7337	10.7083	11.6701	11.5117	14.5301	15.208	12.4223	10.0909	11.8279	23.3937	22.3483	14.6124	16.5159	12.5308
ENST00000262644	29.7024	17.7261	21.4674	22.1173	24.073	19.7528	19.9781	23.5168	19.7728	23.1659	20.0652	19.8987	25.6074	18.0966
ENST00000295702	29.6919	26.9688	42.3272	45.2645	42.293	31.7929	34.8804	50.1325	48.5344	56.9546	40.0945	32.4691	27.8992	31.798
ENST00000422447	29.6775	20.5791	23.2588	66.7238	68.6287	31.2845	61.3534	28.9779	22.0493	32.935	18.0033	87.1753	26.7664	51.6209
ENST00000565678	29.6029	24.6963	0.418804	0.309262	28.1246	0.184687	20.7725	16.9394	34.6911	0.338172	0.003965	28.464	32.8232	18.1963
ENST00000278829	29.5901	29.9576	38.5362	28.2056	36.3932	39.8019	45.4914	36.8181	21.5243	21.8047	25.5493	37.2609	30.7932	23.7448
ENST00000377890	29.59	9.69265	27.8575	14.9948	16.4317	11.7968	41.1498	44.7215	58.4532	103.2	40.8705	41.6859	38.5667	14.2495
ENST00000331789	29.5889	37.8134	45.6332	105.016	48.2947	66.2463	51.0813	51.1543	34.1903	35.7312	21.7486	46.5963	88.0106	37.4352
ENST00000269143	29.5744	16.7437	22.4497	23.0031	27.7401	22.1424	19.2844	14.7703	18.2866	29.7305	28.7071	23.5099	25.5511	18.0942
ENST00000262464	29.5377	8.27076	12.245	11.5474	13.8618	14.0495	13.2837	13.9959	6.57156	6.42406	7.14046	15.0236	22.3009	17.4043
ENST00000372459	29.5352	13.8823	22.6657	19.316	21.4301	26.3419	25.2674	25.3921	21.9327	33.2305	31.1585	25.5669	27.1397	22.3233
ENST00000507110	29.5089	32.7582	42.7821	50.1364	47.681	35.442	25.8472	33.0545	49.2472	59.0923	54.5018	41.5439	37.6857	31.5679
ENST00000267163	29.4671	13.5322	12.2789	12.4404	12.1953	14.2144	13.7689	12.0244	5.47181	4.7428	12.5781	15.006	17.3123	15.0119
ENST00000380629	29.4666	20.0171	21.7427	19.718	21.8662	27.7294	18.6345	19.9298	13.6897	15.1733	22.0906	22.2222	19.7873	30.147
ENST00000254998	29.4579	39.6049	43.3726	36.272	41.6432	34.5577	48.1204	77.8721	69.4977	45.5468	37.8356	45.9915	39.4163	36.8626
ENST00000503216	29.4385	27.1151	33.3914	43.5237	15.3016	29.1425	19.1222	40.0591	32.4624	27.9203	16.5151	24.4509	32.0088	8.78985
ENST00000372435	29.4332	13.9009	15.678	17.6267	18.7444	17.9999	25.5577	25.0376	16.9971	18.7216	32.0594	13.5745	18.461	12.6903
ENST00000261590	29.3762	5.08488	8.15922	6.74935	7.56277	10.09	7.53164	10.1981	5.7082	8.5421	12.0583	10.2386	12.9168	9.6067
ENST00000373703	29.375	21.4674	31.4331	28.8447	26.11	34.5046	27.6234	26.1306	22.0222	36.2828	37.9631	23.2352	26.9787	21.2683
ENST00000399312	29.3673	14.2535	15.856	16.5983	12.1574	16.3392	15.4687	14.6654	7.14862	12.3998	17.1375	16.4162	15.167	11.3305
ENST00000608443	29.3626	46.0806	47.3586	50.4527	59.5032	50.0219	64.0002	50.9597	39.4585	56.7358	47.9637	72.0483	55.4007	66.681
ENST00000369085	29.3624	11.6151	15.8294	27.6493	23.3096	19.0455	12.3051	16.4396	11.2761	27.0576	22.9197	17.2382	20.8723	11.3931
ENST00000238112	29.2894	16.3851	20.3478	20.5986	27.3329	23.3933	20.5953	15.3376	11.9215	16.9905	23.8478	23.1427	24.1972	19.8799
ENST00000370214	29.1541	18.7966	18.1074	16.6124	19.6727	21.214	20.2976	16.4415	9.01899	10.2226	18.4476	16.1309	16.9834	13.9627
ENST00000540509	29.1245	17.2957	29.4784	41.2265	1.36793	18.6228	13.7894	7.41788	3.80132	11.8818	18.5912	11.472	1.17729	11.0737
ENST00000371322	29.0892	13.517	14.2309	14.4835	15.1037	16.9858	12.9988	13.1069	8.79094	12.3238	17.2278	12.1217	15.3653	12.3314
ENST00000441429	29.0574	15.9294	22.2771	17.001	13.0567	14.738	15.0155	17.5103	14.0404	14.167	13.7023	12.4524	15.4403	13.6051
ENST00000288207	29.0187	22.5749	40.9112	58.8738	56.9866	50.6014	20.7972	16.1335	19.1595	40.8953	61.968	31.3941	37.4481	26.2176
ENST00000228136	28.9853	24.4493	25.8718	26.2414	27.5586	24.3929	27.7443	26.7508	21.2295	26.3747	27.5793	24.1016	27.4102	20.4416
ENST00000373493	28.9823	10.9658	10.9254	11.0403	9.67322	9.74663	11.8951	12.4221	7.55923	12.4176	10.5324	8.71054	10.9742	8.43632
ENST00000232905	28.9478	13.4414	15.6404	20.508	14.4575	11.5094	16.1654	23.283	23.574	30.2114	24.5438	14.4489	16.8654	10.4965
ENST00000296456	28.9023	28.5459	34.4967	33.6091	36.7721	28.7745	34.3973	38.8725	30.8083	34.3001	30.2262	31.3198	26.891	26.3451
ENST00000251849	28.897	11.1182	19.1067	16.859	14.2411	15.3908	9.20373	7.6215	9.993	19.3118	21.4448	11.8459	17.9524	9.31969
ENST00000368608	28.8499	26.3553	12.6332	33.3083	38.7252	28.9047	30.8678	34.9607	39.086	50.4565	32.5349	30.9933	31.6865	21.4962
ENST00000555914	28.7995	13.8405	6.83613	18.8055	6.66937	7.41473	10.2298	7.21978	10.5253	17.6812	17.3896	4.19602	9.5489	9.2089
ENST00000215882	28.788	21.5852	28.2449	27.8471	23.6191	32.107	39.9861	43.4046	19.015	60.9241	29.6277	19.0347	27.3814	15.6565
ENST00000301905	28.7719	25.1264	28.7806	37.7099	30.1063	32.4021	26.8114	21.987	15.3122	15.7573	16.566	18.2064	24.6633	17.1621
ENST00000445155	28.6744	11.8063	20.4226	18.6942	14.1241	12.086	15.2636	19.4201	14.3475	14.5033	17.4644	12.6006	23.7924	13.1308
ENST00000519108	28.6474	8.62833	15.9145	9.93614	3.88089	7.99246	0	8.71545	8.4347	2.79811	7.08039	3.11031	11.0844	9.4353
ENST00000393436	28.6248	9.19295	22.5307	13.455	16.5612	15.6503	10.6778	10.9931	9.183	20.64	23.9167	16.1216	18.36	12.7411
ENST00000372133	28.548	26.7065	30.6728	33.911	32.204	30.7142	30.8364	22.0463	21.4382	37.741	41.9643	35.3541	31.4431	21.6657
ENST00000457354	28.513	25.6534	26.1252	25.6692	22.624	22.6829	29.4226	24.5888	27.7022	30.9966	20.6002	24.2028	24.5697	21.5119
ENST00000261667	28.4773	13.1951	19.5041	19.212	16.097	13.2852	12.1411	8.62912	5.82459	10.029	14.9565	14.5938	17.2384	10.8855
ENST00000398344	28.472	40.0784	43.1503	49.2569	54.8322	49.3073	62.457	65.5834	59.5229	67.7069	42.6031	60.7315	37.5335	49.0579
ENST00000372833	28.4661	31.6463	32.2635	32.0537	36.7997	35.3424	45.5659	42.3768	41.9684	44.005	34.9358	34.6872	31.2905	28.9809
ENST00000534380	28.4281	37.6964	3.7e-05	15.7832	21.4427	0	83.1196	49.0558	39.7015	29.4114	25.3913	0.028814	13.7682	16.761
ENST00000287667	28.4055	14.3435	16.2595	15.1292	16.8214	16.0972	17.6302	19.0233	13.9052	16.155	14.8703	19.3156	23.2601	18.1616
ENST00000256637	28.3569	9.8106	13.7767	13.1395	10.8456	12.0101	10.7305	11.2315	4.53216	7.76625	12.5761	13.8339	13.8833	10.8283
ENST00000438607	28.2731	84.3756	36.1423	47.2509	12.5521	15.9597	59.5568	52.7321	40.2436	34.3285	22.0245	9.39793	24.0214	30.0274
ENST00000520468	28.2717	172.925	216.269	263.697	279.534	248.453	201.476	193.684	264.183	248.236	11.7444	241.721	71.8288	219.812
ENST00000549164	28.222	0	0	0	0	0	0	0	0	0	0	0	0	0
ENST00000268668	28.2138	35.0086	37.1848	40.1262	46.8916	44.9153	55.8561	59.0879	53.0737	66.2275	57.8237	43.6086	36.3577	33.0736
ENST00000260665	28.181	18.7867	22.4922	23.5479	22.4033	18.5581	17.3155	15.2055	10.6808	15.4573	27.2542	21.862	23.7502	18.9673
ENST00000259874	28.1602	157.748	82.5982	66.6392	48.8404	63.5932	110.907	100.356	68.2898	65.7173	65.1787	113.016	84.0004	173.367
ENST00000444129	28.1468	26.696	25.593	23.7053	26.2915	24.5421	27.2229	30.0701	27.5675	28.5709	24.9215	27.6556	28.0549	26.6893
ENST00000594496	28.1234	6.56991	9.04239	9.15822	9.47535	8.19448	10.2785	14.8904	6.59912	15.8929	15.5446	10.2192	11.7995	5.42032
ENST00000409753	28.1118	27.0785	35.3281	47.4161	44.768	36.2543	31.0134	30.6958	33.0494	42.6846	51.5795	39.8839	39.1401	26.6446
ENST00000375003	28.1073	14.1892	20.4435	24.8582	19.3008	21.8584	15.5168	17.0362	12.5916	16.8112	23.6071	16.8072	18.2451	14.6948
ENST00000393043	28.0975	14.4471	17.3335	19.9056	12.2723	11.7639	9.87587	9.759	5.25322	9.90979	12.9811	9.7542	13.3394	12.1334
ENST00000375094	28.0764	0.010691	24.034	0.02284	0.009094	0.025239	0.007097	3.4e-05	0.014884	0.014955	0.009038	0.011894	0.007947	0.015561
ENST00000373014	28.0543	28.9394	30.8626	31.5379	30.8501	26.2246	28.1839	22.725	25.006	36.5343	32.9498	27.2295	28.3434	19.9526
ENST00000302763	27.9643	15.9132	19.9264	7.73192	23.6352	5.32407	6.21661	22.8647	6.69629	11.1154	8.64593	17.1765	12.9806	13.9871
ENST00000266970	27.9436	13.059	13.7247	11.7162	16.8296	16.2853	29.6666	30.5415	30.3595	35.3501	19.0511	16.5526	19.0605	16.8949
ENST00000400090	27.9274	12.9142	13.8052	13.6099	9.99179	11.6572	14.8094	13.7863	12.7743	13.8633	12.7389	7.58137	13.9085	6.4363
ENST00000373719	27.9242	19.2586	26.8487	23.258	20.0162	21.3633	12.6195	8.99097	9.14508	15.715	21.8037	19.2897	19.7347	14.9863
ENST00000522855	27.92	30.6013	48.4175	29.9255	36.2295	39.1101	30.1727	32.4984	45.2887	29.7369	36.5223	25.7106	32.3724	18.7242
ENST00000311181	27.9036	25.0224	26.9022	26.6813	36.3901	34.2729	36.2323	36.043	35.331	40.6151	26.0881	31.63	33.3809	29.3322
ENST00000374586	27.8975	10.3404	14.5692	13.7029	14.5238	15.0756	9.81362	13.9606	10.1957	14.3602	16.1443	17.2831	15.7243	14.8467
ENST00000354817	27.8388	5.80447	12.4903	11.6001	9.49105	9.59011	7.39506	8.37428	5.70183	9.25902	13.0977	7.46809	11.5001	5.58404
ENST00000269187	27.8038	22.1995	26.1343	25.9578	25.8691	23.9577	23.6928	23.8758	17.8904	25.0361	29.5401	21.9485	22.6804	21.657
ENST00000253047	27.7966	40.6828	41.9956	40.6712	43.0072	46.5985	57.6524	50.6406	41.3761	38.4711	32.1808	41.575	38.9184	41.9302
ENST00000539276	27.7784	5.46471	2.79522	6.36499	6.42801	7.20386	6.56844	7.41923	5.03011	10.8855	10.7009	9.45686	11.9146	5.51541
ENST00000354618	27.7585	5.15875	9.61066	8.09849	9.31207	11.0701	6.98893	9.11959	5.47719	8.22287	12.2172	7.33448	11.4882	5.25779
ENST00000406134	27.7513	20.1351	20.438	17.4545	26.6485	11.1857	25.6428	0.002501	15.5463	16.247	20.546	12.6885	17.8203	16.6243
ENST00000447578	27.7411	5.86667	0	3.3136	1.83984	0	1.29823	1.13987	4.96994	0	3.54193	1.89266	7.05294	0
ENST00000216962	27.735	7.87222	14.1077	12.0306	11.3955	9.98692	8.22338	11.7852	8.08372	11.7022	14.4995	9.80981	17.1055	7.67885
ENST00000381967	27.7127	24.9513	28.3174	27.6793	26.7983	20.547	26.8722	22.2081	18.9224	21.6074	26.2576	24.5642	23.4033	21.9382
ENST00000262570	27.703	13.7523	18.2413	16.956	26.0476	21.6934	24.2854	19.0287	7.69646	5.34017	15.4824	27.0743	30.9502	17.3484
ENST00000298556	27.6846	9.79963	10.5494	10.7565	8.81273	9.51193	11.6288	13.4176	7.54279	10.6764	12.0938	11.1029	12.7515	9.58869
ENST00000541726	27.6404	22.9412	36.5456	36.5095	50.287	37.4035	60.8055	41.5911	18.9052	24.4321	23.4808	1.01012	1.0086	34.7015
ENST00000263384	27.6357	34.0343	35.7541	42.5591	41.9416	34.4904	41.5472	38.5024	42.6316	61.5211	41.6075	36.9242	36.479	30.3906
ENST00000253413	27.6132	40.0571	37.2125	44.4515	37.4911	35.4594	30.2894	33.0544	32.2046	37.4414	33.4476	33.9184	32.246	38.6871
ENST00000202773	27.5705	44.3228	234.522	239.335	319.359	42.9166	502.64	357.515	369.407	428.049	375.432	382.695	240.756	233.812
ENST00000444676	27.5407	0	12.0794	0	0.002913	0	19.483	0.003917	0	0	0	15.9259	0	11.0489
ENST00000317089	27.5332	33.9367	37.7224	39.3689	43.0101	37.8451	25.8708	28.8046	30.2196	40.2133	40.2695	33.1026	30.6728	26.4268
ENST00000265471	27.5008	26.9233	25.1896	21.9874	23.1148	30.0092	34.1746	47.9985	50.2491	49.7341	27.0629	37.7842	38.079	21.3181
ENST00000379542	27.4793	33.0644	32.2825	37.128	87.8768	40.5476	54.8057	50.0987	76.4896	68.9182	55.0861	38.1087	85.5209	41.4312
ENST00000327044	27.4712	31.7364	36.2833	41.3651	46.5369	32.7068	40.8207	38.294	33.865	44.6946	41.4017	35.7459	36.7229	22.6399
ENST00000347546	27.4566	13.318	17.7273	16.9682	20.3976	22.751	19.0507	30.2587	14.3319	19.9115	16.6757	20.3275	23.8448	20.3905
ENST00000465139	27.4454	8.91629	18.9852	14.0068	17.5302	16.3269	8.95075	8.68809	5.65149	9.20003	13.8902	10.3032	12.4873	8.83312
ENST00000368235	27.4324	30.1213	33.6836	30.3087	27.8379	32.6702	40.1308	39.6611	28.4141	35.7291	33.7867	30.7331	25.1519	27.3194
ENST00000316843	27.4308	14.8962	17.4412	16.3262	16.6479	17.6586	18.7363	19.8752	12.7383	17.3752	18.5696	16.34	16.758	17.6326
ENST00000333188	27.4163	24.6211	10.4796	28.109	36.7204	28.8662	26.1339	18.0504	18.6752	20.5875	30.9647	22.0924	30.4122	17.0888
ENST00000373062	27.4065	24.7287	29.8267	28.3589	30.7717	23.7877	25.0156	25.7388	29.028	43.9669	36.8611	28.7395	26.9762	20.1484
ENST00000253247	27.3668	22.6913	28.6404	28.5569	29.0029	23.6171	15.493	13.0995	26.7212	34.8663	22.7852	18.0623	21.0734	14.2022
ENST00000408995	27.359	20.9015	30.2597	18.2217	10.983	14.9033	16.1227	27.2401	19.0745	18.764	42.2508	30.3154	26.2225	39.6255
ENST00000376228	27.3563	62.4232	51.7853	94.0636	107.492	113.568	84.3574	108.344	112.467	146.999	134.971	186.029	169.016	170.366
ENST00000298585	27.3367	17.0415	15.5699	16.2416	36.1764	19.1442	12.3722	35.3088	63.2052	48.6729	30.1977	33.6815	30.278	26.1915
ENST00000392210	27.329	23.1693	84.16	24.1007	43.8045	41.8105	91.2348	27.2438	42.9791	14.6694	13.4071	35.4639	50.6901	40.4517
ENST00000378609	27.3206	8.90086	14.2959	8.62454	7.42913	7.30256	4.6158	7.60306	3.45578	5.02386	12.8419	7.38077	13.3152	5.65832
ENST00000331457	27.3104	27.9833	31.093	35.4727	40.33	28.3604	31.0487	24.3294	26.9775	38.2966	41.004	31.366	35.3081	25.0533
ENST00000548567	27.3033	8.54583	10.703	10.9822	9.55174	8.99453	10.9212	11.6323	7.12483	12.0878	15.2887	8.24138	12.6548	0
ENST00000340648	27.2566	18.0237	25.9383	23.4225	22.2482	16.7118	15.0789	18.0936	25.2981	38.9351	24.2302	18.1247	18.771	12.9407
ENST00000381815	27.2557	8.86637	18.7477	11.5438	17.5567	14.1762	12.208	11.7967	10.409	15.6382	18.8777	13.9801	22.3141	10.7549
ENST00000222690	27.2546	5.54802	9.56455	7.94614	7.32625	7.82575	5.83793	9.25029	5.4581	8.83826	9.31315	3.71374	7.75207	3.29625
ENST00000305784	27.2411	19.2755	22.9569	25.9415	32.0976	34.0977	37.5956	32.2519	28.3443	30.9948	29.6234	27.9666	32.6329	19.5579
ENST00000356464	27.2301	0	50.7324	0	68.5015	0	71.5501	70.413	0	0	73.4883	0	50.2791	0
ENST00000337620	27.2269	25.1339	30.3616	36.6546	34.9009	32.5553	25.6703	25.8122	26.9928	29.5091	22.195	38.6793	26.1851	34.1606
ENST00000436227	27.2151	4.04955	7.37931	4.63609	4.02774	3.74663	3.09379	0.846151	4.49988	12.6103	13.8015	2.99151	10.2602	2.8088
ENST00000332556	27.19	48.4675	32.3498	34.1302	36.2117	51.6408	36.263	37.2902	30.6591	38.6691	35.7997	39.6027	37.4329	45.4583
ENST00000391851	27.1487	56.8545	73.0707	51.6465	58.1698	62.6937	70.0472	49.8466	48.6613	48.7266	60.7123	61.6149	45.0547	44.7292
ENST00000246043	27.1432	3.02349	8.77994	7.05882	14.1287	8.06169	9.05055	9.54208	5.26541	9.33692	16.487	16.1964	30.4033	12.0103
ENST00000285279	27.1065	3.74317	0.601408	20.3703	23.9007	20.5416	3.62724	17.1291	1.48516	16.5959	18.7916	20.4615	8.49412	18.0993
ENST00000372857	27.076	15.9816	15.5439	14.41	17.9375	13.8589	18.7932	19.1048	12.4981	21.1749	19.3716	15.0615	21.6099	12.1722
ENST00000226230	27.0528	6.85719	3.46676	17.2715	19.1992	16.1974	8.35366	11.3248	14.2593	13.5937	16.0673	7.29453	9.59556	7.06164
ENST00000544180	27.0057	20.3695	19.7713	22.9474	30.0952	19.5002	15.2155	16.1109	17.6224	12.3451	16.3878	14.2939	24.1061	20.1963
ENST00000481273	26.9979	30.4396	14.6204	0.803249	0.277	23.0511	12.2052	0.68453	0.247923	18.2848	11.3361	0.696872	0.980838	0.503357
ENST00000160827	26.9811	19.2871	30.5807	31.5063	35.7475	41.9608	24.4256	32.1472	35.1409	53.562	45.847	32.201	32.1752	23.9219
ENST00000380668	26.9804	13.4724	17.1582	14.4987	15.9768	13.9338	16.6759	16.7569	5.32903	4.98873	17.0035	15.0036	5.29208	13.5041
ENST00000356126	26.9785	8.1667	16.095	15.1556	9.73558	9.26704	9.13794	13.0525	8.34016	12.8103	15.0961	7.69456	13.7625	4.8568
ENST00000340473	26.9729	35.5913	45.4064	44.1601	41.0875	25.5916	27.0578	14.8884	0.010536	0.016516	27.004	33.2576	28.9227	27.2629
ENST00000492989	26.9591	10.6271	12.097	12.7128	23.0657	10.1149	13.4946	0.282235	0.160252	9.08977	15.7217	1.7515	9.95182	5.92216
ENST00000262498	26.9578	40.2096	36.8225	29.1012	32.8474	25.7077	28.8992	53.7426	57.5638	76.5381	45.4629	42.1886	39.558	22.4628
ENST00000400721	26.9442	13.9652	18.282	18.355	14.5266	14.5611	20.7865	23.6502	0.702189	25.3203	21.1106	18.2148	23.9718	0.911776
ENST00000303538	26.9361	12.2712	15.5131	16.5743	16.9852	16.59	14.1224	9.79079	5.64996	9.66225	17.9682	14.0575	16.08	11.0146
ENST00000382361	26.8863	28.855	26.8464	31.5255	26.4974	25.0177	25.5904	33.1938	32.6031	53.297	59.713	33.9938	30.7934	12.7675
ENST00000371142	26.8701	16.3279	18.5722	18.7855	18.5601	17.5218	15.2601	15.6091	8.60571	14.4408	16.6438	18.2505	19.0112	14.5989
ENST00000345807	26.8406	30.579	51.066	30.7688	34.9276	48.9998	74.502	58.1027	50.6821	40.7323	42.1176	43.2656	41.2369	24.0533
ENST00000409747	26.8206	26.0237	28.2077	29.7264	29.7901	25.4962	24.7569	22.7145	20.1813	22.4554	24.4426	8.08387	24.0968	8.56464
ENST00000376389	26.8184	13.5168	16.4147	16.7589	19.4806	23.3702	21.3131	20.8148	13.2911	20.5225	26.8864	22.7872	20.2046	22.8939
ENST00000295770	26.8088	20.8337	21.1157	17.0479	18.1659	20.7165	21.7358	15.5584	13.8397	15.4438	22.2679	27.0438	24.6906	18.2143
ENST00000379731	26.8022	10.8598	11.659	10.7633	8.14012	10.145	9.33	11.8936	6.17833	15.333	14.5528	10.7187	17.0235	12.2815
ENST00000276297	26.786	13.3271	16.0892	12.2296	8.9918	10.0684	5.93156	11.789	8.2941	12.3988	14.2599	12.2267	13.7224	11.2701
ENST00000337273	26.7828	18.4014	24.6607	28.1081	20.653	15.4653	16.4833	14.3727	17.661	24.4773	23.2265	18.1503	19.5678	16.419
ENST00000376007	26.742	5.23701	8.83056	9.20305	7.67352	7.55506	0.852644	9.67372	6.67042	12.2852	15.4714	9.68968	16.9959	6.02274
ENST00000302503	26.7301	18.2659	22.6723	23.07	23.199	24.4374	27.4347	22.6176	15.6179	20.0777	26.8678	23.0806	22.285	15.1611
ENST00000245539	26.7122	30.3463	33.3499	26.2839	33.716	27.7265	35.2064	32.9829	35.6174	29.4488	30.2578	28.4932	25.7565	19.8291
ENST00000343666	26.7105	23.5561	27.7005	27.8285	26.0247	28.4969	27.0481	40.6093	43.9476	43.1338	23.9397	25.8246	27.7299	22.3227
ENST00000328703	26.6909	28.4511	29.1511	31.8628	32.8728	31.8055	37.9309	34.5071	28.7209	33.5715	37.4419	29.9518	22.2635	21.4918
ENST00000242776	26.6859	11.9501	14.2461	21.833	18.9442	20.1169	20.7637	20.1344	11.6222	8.75626	19.5917	10.1216	14.3965	9.29306
ENST00000330374	26.6469	23.6509	24.2031	27.4009	28.0339	23.0598	22.6353	22.0533	19.9273	24.5987	21.2976	23.5882	23.2587	19.0284
ENST00000644934	26.6343	7.55353	15.4364	2.50777	8.37004	14.2409	11.0428	2.28878	4.80034	5.16135	4.82627	3.03953	6.42395	4.33249
ENST00000316629	26.5998	27.3245	29.9086	36.9341	12.2561	39.7688	29.9867	26.0065	23.6724	15.9681	41.3993	23.4323	13.0553	20.3086
ENST00000409400	26.5911	26.9083	27.338	24.2089	47.5706	32.4197	31.2992	22.1376	13.5609	16.8845	23.6025	23.0273	24.9734	34.1314
ENST00000354775	26.5861	8.46281	13.6028	13.1377	11.7075	12.0427	10.4586	13.4112	10.1621	13.4474	17.6311	8.86566	13.76	7.47332
ENST00000221138	26.586	12.694	15.4173	14.1476	11.5657	11.1823	10.1061	10.812	11.6497	15.4179	20.375	14.1501	16.4102	11.6758
ENST00000371419	26.5427	40.6279	18.3645	52.1485	49.3468	35.9957	21.6691	20.666	31.2892	33.8172	37.3106	43.9206	14.2615	35.4242
ENST00000377943	26.5269	32.344	32.0424	35.4641	40.8784	32.2423	38.0186	35.9618	34.7324	41.7578	38.3771	31.013	27.1253	22.1153
ENST00000275072	26.5119	17.6398	17.3093	17.1103	18.0151	16.8869	21.0787	21.8295	17.0931	18.9797	15.0313	18.267	17.858	13.4186
ENST00000373841	26.5035	18.7636	22.4837	19.4812	21.3034	15.5634	25.6528	27.3166	17.7583	26.2177	19.7249	10.588	72.3527	14.552
ENST00000260810	26.4959	15.861	16.9446	14.8943	16.6338	17.1626	14.9136	10.4385	10.7413	18.1925	19.9974	16.8614	17.4011	13.1776
ENST00000561610	26.4722	16.021	19.2097	18.3931	19.8315	19.9956	22.4162	23.7134	17.6538	2.6668	22.994	21.7034	21.4194	16.6979
ENST00000652148	26.4643	19.8409	22.4227	20.4237	21.4905	26.2289	22.7871	19.7925	12.4539	13.1796	17.3588	24.4369	23.4338	23.1813
ENST00000380325	26.4555	12.3885	20.3934	19.1139	17.7988	15.2065	13.663	19.3093	25.0105	31.66	20.9891	16.7491	23.8159	13.6922
ENST00000394349	26.441	69.1619	68.9898	35.4359	34.1036	50.9137	74.3269	35.2066	44.0293	58.1141	60.4706	35.3714	62.6138	43.3345
ENST00000316939	26.4086	25.2617	28.4419	27.622	37.5711	35.5024	47.1814	47.3507	38.4631	52.4356	41.9959	40.6972	34.8674	29.2761
ENST00000651992	26.3603	84.4142	16.0922	8.85691	2.82681	43.0934	25.9506	36.8661	30.7768	42.8129	13.2583	27.3957	39.3683	19.2352
ENST00000474024	26.3584	6.75762	10.6325	10.2272	6.50132	5.75147	4.9541	7.45776	6.35433	3.70765	10.8344	6.13575	12.5264	3.6446
ENST00000221566	26.3441	19.7183	26.3429	30.8823	31.3385	25.5622	21.831	19.2054	21.275	42.1746	36.2574	27.4509	30.7162	20.4599
ENST00000341567	26.3046	18.6659	21.2835	23.3359	22.0685	18.1546	17.1038	16.3326	12.9044	18.8005	18.6878	18.1149	19.2184	15.0521
ENST00000350697	26.3035	34.3262	37.6366	37.1213	56.0155	41.9451	54.7572	48.4325	29.3891	48.7943	47.9023	54.436	48.7897	38.4074
ENST00000345877	26.2916	9.57241	12.5837	10.7398	8.47078	10.8517	7.56565	7.57726	3.59694	5.97221	10.7588	11.3578	15.3467	10.1801
ENST00000373758	26.2828	21.3313	22.6054	21.746	20.4462	19.9964	18.2907	18.103	12.985	12.5367	19.5006	24.6315	21.0343	22.1234
ENST00000234875	26.2696	30.2871	9.32176	30.4653	58.7935	50.3073	15.1721	24.9979	13.7726	10.3508	28.3979	22.7435	11.4835	19.0932
ENST00000369713	26.2673	8.84745	14.5518	11.4162	14.0961	15.0183	15.152	14.7642	9.65961	10.9833	14.5642	14.1872	21.0874	21.6509
ENST00000258662	26.2503	22.9643	22.3034	22.0358	28.4143	26.0696	32.3758	29.7366	30.1185	38.9214	23.9485	23.6786	27.3858	18.6611
ENST00000011619	26.2249	14.4303	14.2526	14.5618	12.9751	12.7962	13.3579	8.76715	6.4394	14.248	19.7766	14.5686	16.4427	12.1608
ENST00000261396	26.1937	18.9017	21.474	23.5036	24.449	20.7375	17.6597	11.5828	9.68556	16.6131	22.2634	17.7954	20.8017	14.9204
ENST00000284984	26.1934	14.2994	20.2664	15.1124	17.8707	16.1577	15.3899	30.1896	17.2546	19.1041	21.3124	20.7927	31.301	19.5897
ENST00000277865	26.1816	19.3007	24.8577	24.3963	29.2357	22.2532	23.8524	24.0698	22.2281	26.7786	25.1529	26.4742	28.776	22.9335
ENST00000374561	26.1618	12.5793	13.251	27.5619	28.6128	10.4741	47.2064	26.3179	20.423	18.478	15.9039	13.3863	18.8189	11.582
ENST00000249822	26.147	12.2298	13.933	13.999	13.581	13.7482	13.5808	18.3127	17.431	22.7877	16.6517	11.4259	14.6412	11.0703
ENST00000370654	26.1373	22.722	30.032	31.8226	29.9695	24.2334	21.8929	18.0974	22.7847	36.0814	32.1603	24.0143	24.1038	18.4869
ENST00000645496	26.1059	32.22	8.60521	72.0936	22.19	17.5175	29.8477	5.7282	21.9435	27.4678	12.7986	16.2531	14.5186	7.83711
ENST00000649132	26.1056	12.6516	25.9527	0.009576	0.188746	12.3271	8.32004	0.019503	0.005311	4.90982	11.7944	12.1462	17.2879	16.8854
ENST00000053468	26.0951	20.8217	23.5566	25.6659	26.4775	24.5391	26.944	21.8992	21.8719	31.4562	24.4402	23.0812	26.1954	18.5575
ENST00000342669	26.0795	43.8697	24.4685	51.654	35.7927	34.8245	13.5126	50.219	10.9157	62.0479	42.1631	39.0125	27.1424	43.3176
ENST00000333130	26.0449	33.4118	34.0832	34.3394	39.4976	34.9037	40.3059	40.7698	35.7718	40.5142	36.1039	32.4705	33.1459	23.637
ENST00000326840	26.0399	20.7656	24.999	20.3738	18.9509	16.1505	14.8324	14.2266	9.56665	13.3416	21.8029	22.1441	24.1757	23.6333
ENST00000289228	26.0151	13.6556	17.6959	14.981	17.0289	21.8225	23.9753	23.8157	15.2246	14.0284	13.1986	17.0368	18.0848	16.8834
ENST00000610402	26.01	5.21256	0.185667	3.40133	2.84076	7.67935	5.92472	1.73003	2.54248	4.22804	5.24173	8.98695	6.12677	5.5241
ENST00000595090	25.9802	37.302	46.6672	44.116	51.1727	41.5342	47.901	37.6051	29.2972	28.4799	33.1754	32.4621	31.9695	26.6192
ENST00000299608	25.9535	20.1906	21.9959	21.7765	20.3674	18.3429	18.3404	20.9372	17.5874	17.3212	15.5677	18.6088	19.7399	16.737
ENST00000282058	25.9511	46.2618	35.9052	31.597	33.9803	29.3204	69.3472	24.1689	25.1354	44.6179	22.0553	48.4653	31.1597	27.1705
ENST00000246957	25.9286	13.1349	16.2349	13.7403	8.50606	16.2512	19.2888	8.83196	9.83876	10.3092	16.4696	16.5853	15.2623	10.8135
ENST00000366930	25.9273	25.7826	24.7035	12.4879	13.4157	14.7625	12.0232	11.325	8.44294	9.52366	11.1436	15.1329	13.0761	12.6122
ENST00000262633	25.8671	13.0991	25.6968	16.3178	18.1946	5.53522	25.5851	26.8451	24.5998	68.8652	34.0496	17.3255	14.1276	7.83821
ENST00000422840	25.8602	5.26249	8.99395	9.01265	11.253	11.9673	10.529	9.69882	5.35833	7.49268	13.6649	13.6451	19.1839	15.141
ENST00000241600	25.8499	11.3858	29.2985	29.3393	22.9918	19.487	15.6925	17.7018	24.1704	38.8	26.9836	14.2596	22.343	8.81232
ENST00000288937	25.8242	42.1999	40.6476	34.9511	38.4138	38.7574	47.726	40.879	44.9254	33.9369	27.9677	37.9072	41.8169	49.6523
ENST00000322507	25.8126	7.47404	11.0196	10.1596	10.2984	10.1771	9.5451	10.8579	5.65971	10.5602	17.8002	13.6344	17.2875	10.0097
ENST00000381571	25.7611	27.5174	26.8724	29.0466	27.2212	22.5471	25.1278	18.9921	15.3503	18.1875	19.3451	19.3252	23.0346	17.6604
ENST00000316059	25.7509	17.9351	22.0642	19.2594	17.3756	16.9667	10.6419	9.26283	12.3194	21.1216	21.2594	18.2553	19.6381	14.2559
ENST00000372097	25.7467	4.88298	6.73048	9.17838	8.61787	5.16568	6.20392	6.66851	9.69009	14.0254	11.4778	6.80982	7.67624	4.55651
ENST00000524896	25.7362	12.0528	14.4645	19.3371	10.588	12.9464	19.5673	22.8499	18.6356	25.5875	26.5096	10.4801	13.6423	10.0329
ENST00000225298	25.7146	21.2114	5.81024	9.79688	38.5378	22.1344	1.02768	3.20313	0.032755	32.2302	22.338	8.66372	30.7544	22.4402
ENST00000548580	25.703	55.8661	62.1824	56.6227	66.145	66.5995	78.3405	68.0279	86.9622	81.398	57.5044	52.8476	43.8666	43.4617
ENST00000381736	25.7028	16.901	20.0416	23.7024	20.1773	20.7814	15.596	12.6498	14.81	21.4861	28.4261	26.3762	22.1087	18.2647
ENST00000276689	25.6989	40.4158	40.0833	39.8742	52.1538	44.5173	50.2371	60.852	60.4031	40.143	52.0008	46.9585	28.9436	42.0658
ENST00000360467	25.6521	11.4429	13.6643	11.7962	18.5488	14.9877	15.2874	14.6713	7.84438	9.46673	7.30149	23.6514	31.74	22.5742
ENST00000471855	25.6412	43.8167	38.0843	23.9768	50.013	36.7436	62.6062	58.8878	54.9665	43.0195	38.4816	47.1091	59.0805	54.9265
ENST00000301019	25.6293	10.3848	7.71893	8.44783	16.9027	11.3869	18.6218	24.0551	21.1102	29.324	20.1734	19.6588	18.9009	17.8995
ENST00000371477	25.6091	17.468	20.0701	20.7988	22.2667	20.1418	18.1204	14.5553	18.9159	29.9345	27.5735	18.1402	20.0569	14.3576
ENST00000334660	25.603	13.1797	13.7719	15.4747	15.6068	15.7059	13.8689	14.8715	8.77111	10.7911	15.7331	13.5402	15.4692	12.4825
ENST00000301935	25.5844	23.2694	25.0372	14.8782	34.2342	29.7188	22.4881	34.5945	22.1241	20.4384	39.118	25.8554	24.2058	22.7077
ENST00000349157	25.5817	14.7768	0.532709	0.797733	2.14585	13.1048	13.5001	1.31197	1.92414	2.71254	1.06264	2.19309	1.22799	3.63964
ENST00000261192	25.5659	18.2533	21.0598	20.1402	20.9985	24.5783	17.2215	16.5487	9.428	9.43207	11.8059	18.0726	16.8827	13.4247
ENST00000371221	25.5103	14.2916	19.9705	20.6631	20.2403	14.3672	14.4956	14.5369	11.3596	13.8214	14.5211	15.418	18.4756	13.1576
ENST00000527323	25.4911	20.7727	23.7698	24.4466	27.3083	23.7202	26.2654	24.5403	15.2521	19.743	25.0915	25.1304	23.7192	20.5161
ENST00000411529	25.4829	5.31629	8.53152	8.83986	6.43689	6.36733	4.67432	6.55307	3.6799	5.4944	11.7163	5.17996	8.98334	4.34704
ENST00000276390	25.4745	22.9259	37.3245	35.0546	28.231	27.4869	21.9463	19.8124	22.808	38.0127	34.1363	26.8697	26.0727	23.6485
ENST00000373609	25.4254	6.25537	9.21063	8.35868	11.6719	10.8537	11.4996	20.9766	20.4635	24.8524	17.3792	13.5659	17.6648	10.107
ENST00000309099	25.3681	12.7634	14.6704	13.795	21.5778	21.4193	16.2683	12.5815	22.2288	41.9464	19.2727	22.5418	23.0459	12.4612
ENST00000619850	25.3635	25.1937	98.581	123.579	36.7279	59.9212	8.71099	21.1665	34.9516	55.183	70.2005	37.2473	47.0454	29.6314
ENST00000292644	25.3528	15.7541	19.157	17.3178	29.2356	23.0167	24.3871	20.5472	19.6848	25.8577	34.8291	24.6487	27.4448	16.6595
ENST00000376745	25.3464	40.5659	41.5778	32.1757	76.1593	42.8351	52.5406	58.5346	51.4835	82.2135	63.6649	47.275	38.1866	22.4262
ENST00000371621	25.3239	21.1181	18.8933	18.1626	19.8491	19.0421	15.6678	11.4913	13.9009	23.8905	23.5858	19.6617	22.8931	17.2801
ENST00000313655	25.2904	18.1978	14.3703	12.1359	15.9354	13.7999	18.3438	16.3587	16.0459	20.4844	16.5809	16.8997	17.2866	13.1712
ENST00000229390	25.2857	12.8167	15.3253	13.0011	22.1496	19.2603	27.2498	21.6264	24.5593	21.2617	24.0799	20.4963	25.286	16.6705
ENST00000398238	25.2781	13.2764	14.0744	18.2894	12.7303	11.1792	16.9154	15.9707	8.89974	7.41523	13.0354	12.0577	20.4583	11.7916
ENST00000013070	25.2692	17.1916	15.8919	14.4442	14.6139	14.3226	18.4687	18.1966	18.3245	24.4431	17.2861	14.4598	17.2139	12.9675
ENST00000424236	25.2654	0	2.09344	16.4723	13.0452	0	0.039725	11.0669	0.777797	17.4589	19.6504	10.678	14.8565	9.9217
ENST00000306077	25.2642	7.01508	14.6689	13.1447	14.5666	14.0988	12.098	18.4377	15.4654	21.4112	20.5325	13.4467	19.9131	10.4583
ENST00000220584	25.2345	21.6566	13.7085	18.3481	18.1248	24.3577	13.9744	18.5015	16.2857	21.1516	25.343	10.7491	14.0961	14.0781
ENST00000366510	25.2186	18.6443	21.7338	19.5814	20.3038	18.2143	22.1824	20.4441	15.5801	15.0359	17.2845	17.6609	16.1083	13.3581
ENST00000606142	25.2014	8.88894	14.2984	12.2127	11.2051	9.53651	10.0199	12.2149	10.0762	0.039651	15.0673	13.2462	22.86	10.1299
ENST00000361204	25.1967	7.64481	9.73195	9.25119	8.50542	10.7227	9.42971	10.8865	6.18355	8.75981	8.24644	10.6249	11.8576	9.18299
ENST00000245812	25.1964	28.1425	30.5157	32.4656	33.3562	36.8885	34.1354	29.2444	23.5293	26.6696	23.4343	24.463	21.8863	22.8031
ENST00000442747	25.1925	0.427909	3.98515	0.414639	8.98304	0.5831	0.813035	0	0.5012	2.19293	0.399081	0.181896	25.1329	1.21638
ENST00000258198	25.1732	5.15245	8.55573	8.53467	7.68814	7.96	4.71859	7.1802	5.36948	11.4148	11.2724	6.05985	9.54846	5.20507
ENST00000221855	25.1301	20.1498	22.0772	25.0972	32.7367	28.6701	37.212	27.716	23.7605	27.4185	22.7903	23.2968	23.8136	21.356
ENST00000354336	25.1236	15.8684	22.3823	26.7235	24.7208	20.434	7.26279	21.4227	31.0181	35.7545	27.9944	21.3177	23.3436	17.6988
ENST00000358746	25.1198	18.6374	23.2591	18.0382	13.4505	21.2971	19.7577	18.3239	10.1849	9.71245	14.5581	22.4286	13.1944	18.1831
ENST00000301458	25.075	25.8035	30.7694	28.2401	27.7606	32.138	31.8047	43.6959	30.0456	36.7184	28.3424	30.0187	29.1494	26.773
ENST00000611969	25.0658	40.4114	34.9018	34.4087	34.4908	44.3345	51.1031	51.6989	45.224	37.0981	17.6759	7.06312	30.6714	31.9506
ENST00000474879	25.0482	17.2795	19.7322	17.8094	2.62554	15.4758	25.2242	31.1603	18.9046	31.0542	21.531	21.7147	3.68708	6.91336
ENST00000274712	25.031	33.9778	35.8106	34.8867	46.0595	40.013	47.5973	52.297	52.8343	57.468	52.7994	35.6769	39.0015	32.3493
ENST00000367103	24.9744	15.7323	19.7562	20.5215	19.9622	17.3848	12.0043	9.64471	7.77217	15.3768	19.5151	18.16	20.5068	14.0786
ENST00000615637	24.9722	42.1101	26.6217	27.493	34.6601	22.5473	34.4594	35.9355	39.4294	35.6634	5.34222	45.5394	36.9704	32.3946
ENST00000525428	24.958	18.1595	29.7098	28.5982	23.0316	30.9584	29.1093	19.5714	12.23	24.4319	16.2216	15.1262	10.2652	14.1364
ENST00000368305	24.9536	30.1066	29.0129	26.9101	32.6645	25.0042	33.0897	35.7184	26.912	29.6047	23.7197	28.2906	29.7309	25.6461
ENST00000595018	24.9324	15.4522	21.3028	19.9118	9.27086	23.2925	1.19348	21.287	4.96925	9.63504	11.8088	22.1151	9.80623	15.6933
ENST00000361175	24.9167	15.0759	16.0684	16.028	15.8489	16.0571	15.7143	14.5455	9.21792	7.84714	15.7765	15.8784	15.0211	12.7973
ENST00000521440	24.9101	35.2557	46.837	35.4203	10.2509	9.03054	80.5046	48.0512	56.2589	42.8652	66.6464	37.547	62.0622	97.9019
ENST00000239666	24.9095	29.3287	30.2632	28.8943	29.4046	29.7074	36.7805	35.2614	30.8765	30.7074	24.1096	27.4813	27.4882	25.1091
ENST00000329138	24.87	18.3687	21.1546	20.4889	23.8907	20.072	26.2985	24.0616	19.6989	31.2958	28.1548	24.8677	30.0074	23.0672
ENST00000308025	24.8601	9.95241	13.7786	14.3214	19.3422	16.3951	14.4862	12.5033	12.175	22.9571	22.1913	14.74	16.8411	10.3664
ENST00000585321	24.8295	21.6665	17.6034	22.9293	46.2183	27.8577	27.6395	49.4565	37.466	43.9133	38.5078	53.7413	30.8266	45.6707
ENST00000396859	24.7991	23.1602	26.1124	26.2499	30.2522	32.9685	37.7549	27.749	27.6702	25.6807	18.9242	19.1093	28.2705	20.7439
ENST00000301585	24.7564	32.9045	38.1909	39.8232	38.6455	38.4333	38.9045	29.1769	27.2179	43.0522	28.7202	26.1653	26.965	19.8548
ENST00000370508	24.7299	25.7972	35.988	44.3856	43.7181	34.7227	29.5818	26.316	21.15	24.481	38.0367	29.7303	27.9703	24.7759
ENST00000360003	24.717	19.118	19.747	18.4644	6.16256	19.1544	10.1122	9.72468	11.2676	15.7077	24.1726	13.5521	16.7324	10.1235
ENST00000595444	24.6924	22.6873	26.5257	37.429	38.0498	31.3944	28.1846	30.5788	29.2132	45.2391	34.1837	30.5673	32.8559	28.3759
ENST00000248879	24.6871	25.5153	27.2599	25.3624	28.603	22.539	39.5746	29.4458	35.1842	30.512	30.6773	25.9791	29.4315	21.1503
ENST00000309324	24.6835	39.4156	38.9147	37.8743	46.4462	43.4202	53.8952	48.6916	40.2552	42.168	32.8851	38.9245	33.0887	33.2443
ENST00000303596	24.6781	20.1607	28.6681	30.288	33.6693	29.8742	14.3085	25.5727	39.4517	42.7401	23.853	27.1631	26.035	20.0604
ENST00000457607	24.6206	13.485	16.5998	14.7806	19.0913	15.4328	15.2246	16.3688	20.0867	33.2137	22.541	17.2843	19.2571	10.4988
ENST00000216038	24.5941	20.722	22.9582	24.4233	36.1189	24.696	26.7953	22.255	19.0596	24.7628	28.9848	26.1693	27.5486	20.1934
ENST00000235090	24.5252	23.5641	31.6589	37.9185	33.839	24.2803	25.449	24.1413	22.6168	29.2461	32.6396	30.2302	32.3018	16.4456
ENST00000423431	24.5189	16.6007	0.01833	20.4348	0.033166	0.047218	0.047521	0	17.5945	0.020945	0.016826	0.018552	0	0.002746
ENST00000431816	24.5162	3.55961	1.97246	0.597735	7.58857	4.13032	11.1252	2.03224	3.08646	3.29825	0.607376	10.8589	17.8202	1.79865
ENST00000321394	24.5005	31.0825	26.016	35.5746	37.0031	27.3078	30.4779	25.6733	25.5746	23.0702	29.2112	19.0232	18.7585	19.0695
ENST00000397625	24.4887	13.6302	21.7756	27.1066	30.0396	28.5866	9.88696	9.07248	25.1287	35.9836	31.6534	27.0984	23.7113	18.7776
ENST00000301838	24.4725	32.8384	48.7546	42.1374	36.5969	39.6464	19.7101	36.7378	48.7087	52.8375	30.4344	43.7632	44.717	36.39
ENST00000361337	24.4708	6.65573	10.2271	9.95897	7.53153	5.98392	5.43358	5.93073	4.17489	10.8864	26.2271	9.45346	15.2337	5.80316
ENST00000370277	24.4519	35.4291	34.4707	37.4394	44.1631	40.2771	48.6968	47.0003	42.8842	43.5751	34.2255	33.5217	29.0023	31.7667
ENST00000544848	24.4291	38.442	36.6249	39.8098	57.5573	57.3618	49.4397	48.4093	43.0391	45.4179	37.1475	57.6582	42.0352	48.3336
ENST00000375772	24.4114	4.34811	0	4.94197	5.55777	4.45942	8.97813	0	4.50793	5.87781	4.6348	3.8177	11.7706	4.1463
ENST00000261890	24.3986	21.0288	23.8682	24.3916	23.6845	21.703	20.4282	18.7767	13.8691	19.9667	25.6646	19.9375	18.94	18.7155
ENST00000381237	24.3948	7.4501	24.69	10.4575	25.8241	7.85235	7.04165	5.19863	6.06237	22.131	24.2424	25.4711	8.74168	16.9885
ENST00000358432	24.3516	47.8578	39.7963	27.9389	20.7812	22.9735	24.9386	57.3995	46.3201	60.3139	65.6691	54.7016	49.2143	42.5744
ENST00000256255	24.3502	18.4262	20.1369	24.8428	30.3085	16.0242	27.3534	17.6753	15.3592	30.9401	17.8166	16.5805	12.8486	15.4057
ENST00000256682	24.3364	16.6458	18.6537	16.4146	19.5032	18.5508	12.4087	18.2423	13.6518	17.5844	20.2433	14.2435	21.5008	15.7525
ENST00000401406	24.3305	29.8154	31.6254	29.807	28.2768	28.442	35.0205	36.5272	29.9334	36.4017	26.7954	26.6183	30.6688	29.5442
ENST00000256441	24.3219	31.2348	37.1736	29.8837	27.3059	28.2917	45.2812	35.4989	40.5246	41.4445	39.592	25.2289	23.4491	20.8987
ENST00000315286	24.2945	17.8399	19.8165	19.6641	23.0463	19.1677	21.3556	16.9797	19.6651	27.1487	24.0562	18.9865	21.6941	16.8113
ENST00000508921	24.2911	9.67589	9.62895	8.90859	5.77431	6.62671	11.071	14.0138	10.3414	4.8747	7.39356	2.39549	13.44	1.1567
ENST00000381473	24.285	23.941	23.8146	25.2908	22.1364	22.6642	19.5362	20.3676	4.85511	17.1492	22.1014	22.6611	25.2952	17.8427
ENST00000398637	24.2526	12.9018	19.7454	15.6615	13.0765	19.9144	8.77532	7.02316	8.68919	13.9776	17.1815	14.5333	13.8255	9.61456
ENST00000521545	24.2522	21.9898	24.9776	23.2777	26.7472	26.3632	27.9903	26.7926	12.7356	24.11	22.524	27.3209	28.9126	24.5416
ENST00000253814	24.2508	17.9211	21.626	23.2299	23.5977	20.3163	20.7349	18.8558	13.4693	18.6318	22.7762	18.6045	20.951	16.8067
ENST00000396388	24.241	7.95099	4.79359	5.53927	22.6665	6.17424	5.66733	7.61109	17.7558	29.6593	23.8375	7.43767	6.64272	5.64464
ENST00000470487	24.2313	10.6692	13.6614	12.2099	13.8961	12.8562	12.0125	11.6917	6.90667	9.00906	11.5106	12.4249	15.8583	12.3224
ENST00000265563	24.2269	13.1287	14.6847	16.8987	18.3384	12.7561	14.4557	13.551	5.95506	7.69748	12.5618	12.585	12.805	7.75095
ENST00000618172	24.2199	15.9296	19.3473	18.3061	24.9634	0.03459	21.1501	20.4831	17.401	35.305	0.065554	23.6405	24.0235	0.003354
ENST00000419869	24.2173	4.49442	19.7526	30.3821	23.1285	17.8266	18.1107	19.6736	12.7186	18.5711	24.1298	17.5053	25.6592	13.7362
ENST00000265097	24.2057	32.89	33.7247	33.596	31.8411	28.1874	29.9119	27.8516	25.742	31.019	28.7336	29.8409	38.9883	42.2133
ENST00000316788	24.191	10.9651	14.5247	13.4153	15.7687	16.2954	33.3976	17.2797	19.8278	14.5722	12.1707	30.6493	15.973	32.3082
ENST00000337859	24.1799	26.4853	16.2174	19.4745	39.0784	26.7677	13.1219	10.1143	13.7562	23.1712	22.024	27.6568	15.6366	14.7475
ENST00000371157	24.1666	5.94238	4.75623	3.86578	3.71947	11.7694	4.67054	6.62157	2.27327	5.90717	9.99673	8.3492	5.58725	6.96153
ENST00000378643	24.1659	19.1117	16.9079	16.9985	20.8731	21.2025	28.0709	23.4029	21.5485	28.8692	17.3384	25.6256	28.2469	23.1718
ENST00000382374	24.1335	16.7647	20.3058	20.6568	17.6424	21.3764	18.9963	15.1461	12.6601	10.6811	18.5951	18.3452	16.1245	15.6108
ENST00000555309	24.1326	13.5969	20.0883	19.7145	19.1126	23.164	8.60738	19.1202	8.69459	12.1166	16.9147	20.934	28.0633	10.2577
ENST00000339082	24.1272	27.1425	29.8291	29.2753	33.3421	24.7791	29.6899	30.7012	29.339	33.928	23.8829	33.7029	30.2851	23.1901
ENST00000295682	24.125	30.4837	33.1903	33.1353	34.0187	33.5046	41.1931	41.7177	32.1437	46.0828	42.6703	36.4901	34.0894	31.3193
ENST00000246151	24.0928	17.9749	20.8469	22.8937	31.0311	22.9703	31.9247	38.0589	48.5615	69.0313	51.3174	28.6941	32.6459	21.6567
ENST00000291442	24.0768	24.4919	25.7814	26.7016	37.7851	35.1335	23.8693	20.9699	27.4567	39.731	31.68	39.3857	33.9946	31.8743
ENST00000294244	24.0457	27.3638	27.1801	35.4496	39.2257	33.5351	15.3549	35.9253	36.6676	51.4204	38.7429	38.947	33.4862	25.7935
ENST00000321442	24.0446	12.4626	14.2466	12.8388	15.6261	13.7464	12.0376	10.1995	10.9222	15.5074	16.4325	14.3748	15.7109	12.3276
ENST00000433834	24.0311	0.003849	0.242481	0.466604	0.017943	0.398596	0.406128	0.277801	0.134986	0.09293	0.218517	0.392821	0.315075	0.587755
ENST00000263368	24.0165	30.0698	28.5716	26.7923	37.0628	37.6617	45.4056	45.7059	39.7499	43.5168	37.2741	45.2648	29.9971	36.6356
ENST00000396049	24.0016	16.3859	15.617	19.8717	17.3054	19.0558	14.5104	21.9404	20.205	19.6084	15.126	15.5978	17.8876	12.717
ENST00000366813	23.9966	11.9805	14.3148	7.6004	9.8939	12.6852	8.30963	14.0245	11.6889	0.89506	16.1593	0.072654	12.353	6.6456
ENST00000286371	23.952	19.2815	23.4626	23.6973	29.0332	1.49539	26.3798	27.3101	18.673	27.4686	32.2177	33.7702	26.692	22.3553
ENST00000321765	23.9418	8.29604	16.0976	24.2534	22.1747	20.2018	13.7861	10.7333	11.4373	23.2097	28.3702	12.6338	17.7784	9.32447
ENST00000261182	23.9143	15.264	14.5954	6.85998	19.5514	17.292	22.9429	22.0126	13.8543	19.5153	21.4635	8.57382	17.7574	21.2781
ENST00000607124	23.8953	323.272	139.12	51.7443	71.2769	64.3779	51.3036	35.3234	60.3039	64.5843	40.3514	60.12	63.5969	73.7222
ENST00000340828	23.8776	20.9452	22.4036	27.8213	27.5132	28.5292	21.2099	19.0556	13.8741	22.1937	14.3325	26.979	24.4671	32.8461
ENST00000402521	23.8719	4.79897	5.43226	6.85531	5.48275	26.054	8.12226	17.0352	20.4062	11.9218	31.9014	6.87048	6.80981	0.531137
ENST00000409339	23.8587	6.46863	8.82583	7.99635	8.64886	10.0834	7.49491	9.31769	4.97424	8.76161	11.8484	4.8647	10.0534	6.27927
ENST00000323699	23.8379	21.8287	18.1967	20.4142	39.1289	36.3872	24.1382	26.9912	21.7574	28.9709	16.2034	39.3405	19.195	14.4371
ENST00000229854	23.8279	0.85024	14.4429	1.26025	10.0669	42.2439	43.6426	34.6775	1.72288	0	1.07845	11.284	26.0414	11.4058
ENST00000437231	23.8203	3.11396	6.72496	1.96695	2.13904	3.40949	5.07759	3.54331	4.76187	6.8297	2.4157	4.06433	4.62246	1.93634
ENST00000296412	23.7653	23.0369	21.8405	28.5041	30.7649	26.812	30.2625	24.1671	21.7043	21.6059	24.7433	17.9296	21.9367	23.3501
ENST00000296577	23.7637	21.0448	26.7028	28.6478	28.3677	19.5284	17.7192	15.9282	17.1816	25.2115	27.6692	22.2731	22.1734	13.72
ENST00000217402	23.6572	7.97933	10.9802	9.56629	11.2375	8.43433	9.68505	12.4231	7.87481	13.2217	22.3193	12.7717	19.0544	9.98845
ENST00000383018	23.6283	23.4058	22.9942	4.43954	18.8498	3.69685	29.9963	2.02828	26.373	1.38124	1.29653	2.54371	2.10409	2.11559
ENST00000295640	23.6216	7.45364	8.16171	9.42211	11.6549	9.95387	11.1806	11.7029	9.34407	12.6739	10.0746	8.7874	10.0376	9.5829
ENST00000525815	23.6204	22.931	36.474	38.4328	40.6601	26.0419	21.3541	18.5169	22.4777	30.1781	42.4821	32.4826	29.8292	26.5046
ENST00000302386	23.6071	14.5092	24.4734	19.7774	21.669	35.0723	26.3602	29.7468	24.0501	25.4343	19.3674	20.5374	20.676	20.4686
ENST00000263239	23.5877	16.9215	23.1269	23.8012	23.1352	19.5473	15.7429	14.9191	18.7498	25.3387	26.8381	19.4659	22.9614	15.3873
ENST00000439958	23.5594	8.36577	12.5967	11.7957	10.2416	9.54063	8.34753	9.87566	11.3983	18.8412	18.9421	11.1615	14.3338	6.21944
ENST00000285243	23.5501	14.6979	19.4703	17.9849	16.0812	15.8936	9.93773	11.6884	15.5877	21.0705	18.2342	17.0127	17.6187	11.4344
ENST00000418900	23.5289	5.53375	10.1523	8.58726	76.6912	38.9961	46.9068	59.1798	47.0392	53.3417	35.9232	63.8758	54.5185	45.2211
ENST00000356508	23.5136	0.11513	0.19373	0.100866	0.177057	0.166713	26.1544	0.074053	0.037593	0.144288	0.129212	0.183488	0.083011	0.105776
ENST00000249786	23.5114	18.2359	24.0318	26.5198	32.4616	26.3725	14.4555	89.3246	16.3503	52.5314	45.9247	38.0757	17.8131	33.9826
ENST00000527696	23.507	21.1038	27.4526	1.75576	1.37485	0.812572	24.2299	24.4646	24.1853	32.1373	23.0707	19.9537	21.3376	15.3026
ENST00000394332	23.4966	43.9511	42.5202	44.1491	62.2934	32.5725	106.484	116.546	122.486	114.421	74.5928	51.921	44.2597	37.1868
ENST00000435706	23.4618	9.2093	12.165	11.5246	13.8742	13.3025	9.91934	9.8958	5.74207	9.10319	20.9925	10.6501	13.1312	10.2334
ENST00000521512	23.4586	1.92078	5.24698	3.16695	11.9824	10.8368	9.42369	6.84315	9.55452	9.8949	13.3785	12.4843	11.417	14.3525
ENST00000252512	23.4564	6.89834	9.67094	10.6404	10.4828	10.1655	9.12354	7.51636	3.72991	6.50519	14.8217	9.66028	14.0449	8.39021
ENST00000285968	23.4519	4.23395	8.12995	6.92425	7.45734	8.01459	4.62888	5.49073	3.67315	6.65169	12.1254	5.50195	8.98866	4.73596
ENST00000272638	23.4203	16.121	13.8241	12.7807	13.8289	13.5141	16.0105	16.0533	9.03605	17.8887	18.7713	14.3147	18.5805	12.577
ENST00000084795	23.3934	35.048	25.0535	24.6646	468.987	437.997	568.184	544.238	36.0362	121.677	41.2035	407.129	66.5497	420.379
ENST00000265138	23.3797	31.5319	15.7318	16.0306	22.3944	28.7218	29.2907	70.6107	52.4872	42.3725	28.7793	14	18.6991	25.7281
ENST00000335503	23.3558	1.31386	15.1722	1.81841	1.58029	1.52979	26.4111	1.55782	17.1081	27.4237	31.3993	1.75556	1.42883	0.898516
ENST00000215829	23.3429	25.767	24.4393	19.4205	30.1704	23.9134	30.5925	25.6955	30.3689	32.7306	22.9863	19.4567	23.3136	15.1869
ENST00000389003	23.3114	10.9731	14.0902	13.9083	11.7672	12.0439	12.9939	11.9864	9.58698	10.7602	14.1649	12.5465	16.4989	9.13655
ENST00000278483	23.292	26.9734	25.4982	22.8951	25.3826	25.7978	31.3571	16.9542	16.1347	12.1734	16.627	25.1091	24.5154	20.2045
ENST00000266529	23.2918	22.4936	19.5503	22.4624	22.8039	22.2096	24.4134	21.4922	14.8517	13.1128	16.7852	24.4802	21.1443	18.4505
ENST00000452185	23.2909	18.4907	23.0713	23.1773	23.9107	20.4938	27.8624	25.845	21.3144	22.1889	21.1951	23.4976	17.6887	16.9332
ENST00000265056	23.2867	6.6681	6.24181	4.54545	11.3956	7.45262	7.78704	16.4061	13.3004	17.067	14.3833	10.0871	16.3409	8.21709
ENST00000274255	23.2763	3.2407	4.10102	11.203	6.62261	9.26224	10.2572	2.50816	10.1875	9.55707	2.16214	5.42827	11.5409	4.94354
ENST00000264893	23.2759	14.6604	21.0767	8.66722	17.6648	18.5521	15.6458	18.4123	11.7466	15.2339	16.0233	16.1647	0.667775	13.5992
ENST00000348108	23.2574	29.5193	20.4562	27.8198	39.3117	28.2658	35.2131	39.6229	24.1132	23.6759	17.9348	24.2012	29.8993	43.895
ENST00000310144	23.2328	12.1059	11.071	18.0322	11.1278	19.1094	20.1568	20.5176	7.2498	28.0833	21.3788	16.663	12.5186	10.6619
ENST00000295797	23.2187	19.2397	22.6414	24.2137	22.5657	19.9256	17.8672	14.2119	8.24931	14.293	25.5061	20.8083	18.7322	17.4816
ENST00000391751	23.2186	22.7812	25.9893	27.4938	28.1634	31.6644	32.3137	30.7773	35.4571	36.2539	31.7421	37.5419	35.0445	24.3325
ENST00000259512	23.2115	20.5197	18.4165	25.351	25.9136	21.6113	23.2746	22.8452	16.7456	29.2859	24.9845	20.0729	21.21	14.8048
ENST00000257527	23.1749	5.70171	12.3169	9.42088	8.48596	6.49181	5.13651	6.56464	3.3322	6.41955	9.71625	9.8794	20.7966	7.76031
ENST00000000233	23.1745	31.3216	28.9557	31.0295	28.3741	26.0595	41.6157	31.4107	25.8782	32.23	39.5936	21.4095	26.6938	16.957
ENST00000263556	23.1578	20.5746	19.0031	23.1137	27.5299	37.1839	20.4772	20.511	16.5929	20.1147	24.5364	34.2811	27.6964	47.2931
ENST00000305786	23.13	11.2325	26.099	28.8139	12.9313	21.3951	30.0621	33.9825	37.2033	29.5387	11.2662	22.5024	9.17444	15.3692
ENST00000217958	23.1034	22.7647	25.7038	27.7516	28.8998	28.5969	25.7509	24.4449	21.6558	20.9142	23.9796	19.3019	22.8766	18.8455
ENST00000362031	23.0968	0.127258	0.258385	0.391631	0.318137	0.29215	0.272766	0.29752	0.151174	0.351265	0.210408	0.30934	0.289501	0.43591
ENST00000336314	23.0864	3.9783	8.75751	8.4914	8.61761	7.07661	4.71869	6.25873	4.0087	8.42348	13.3445	7.53984	13.0669	5.10178
ENST00000372764	23.058	49.3986	35.6462	23.0079	28.7828	33.8478	37.3683	43.3191	18.5379	15.4387	20.6195	46.8052	52.1267	49.3323
ENST00000371626	23.0456	21.9284	28.2998	30.3669	28.6671	28.2747	25.6033	28.0931	25.8209	30.8174	29.8857	32.3962	28.9655	29.9074
ENST00000354098	23.0421	22.9595	15.4375	11.6187	27.5832	16.9774	19.2634	27.0623	21.5879	18.4802	31.1397	15.9085	14.4688	18.476
ENST00000221233	22.991	35.9721	37.0472	35.8278	32.818	31.9446	40.3028	37.637	41.4691	39.914	34.6127	41.4376	41.1757	40.0094
ENST00000265295	22.9523	19.4031	36.9195	38.4007	24.6077	25.5415	9.89637	9.26541	5.10478	20.9318	24.5918	3.00318	22.3506	18.1952
ENST00000375147	22.9391	14.6348	17.9589	16.8976	18.0733	16.686	15.8076	14.6999	11.4524	13.2862	16.3195	15.1486	16.4152	13.7578
ENST00000394434	22.9226	6.78615	18.6029	7.86587	11.5915	23.0878	5.99735	5.6111	5.17705	10.2977	15.7769	8.75139	23.7179	20.5576
ENST00000429644	22.9139	17.5963	20.2182	19.5298	20.9741	19.3959	26.1304	17.1182	9.08279	5.12846	8.93097	20.2739	20.4762	21.8853
ENST00000242059	22.8946	3.76162	8.20019	7.07695	6.81588	7.35264	3.98866	6.32995	3.62895	7.54967	11.3264	6.43271	10.0568	5.10495
ENST00000252015	22.8754	14.1423	16.5147	18.0501	18.776	19.3948	19.4393	15.1981	9.11532	17.0826	21.8626	18.4505	20.245	13.2902
ENST00000262061	22.8706	2.5036	9.40764	6.44644	5.85541	7.3392	2.52034	7.55024	1.9198	7.42576	7.28943	5.02162	9.26305	5.15214
ENST00000381083	22.8664	33.399	36.3041	29.621	23.0838	10.2412	21.6677	24.5136	17.0279	7.94833	6.66121	14.8455	24.2473	14.6886
ENST00000271308	22.8091	35.447	33.2933	35.7325	33.9014	33.4072	38.6521	24.0329	30.241	36.9316	41.5	30.3247	32.9191	28.3748
ENST00000621318	22.7896	0.027397	0.096268	7.97092	0.074369	0.062069	0.040189	0.282172	0.242454	0.249442	0.064244	0.18255	0.391459	1.07416
ENST00000612662	22.7859	7.14753	8.75975	7.68588	6.32494	7.64092	11.1169	13.8766	8.72294	13.4269	11.5646	8.35228	10.9305	5.35529
ENST00000007390	22.7818	19.4301	21.3908	21.8093	30.5126	25.1433	31.307	28.9275	23.1656	29.6834	24.4253	24.7991	25.76	17.7603
ENST00000394667	22.7691	72.9519	57.3167	8.54532	7.95995	76.6617	83.0196	7.38279	6.96603	5.27071	2.90528	10.6356	70.0637	7.52081
ENST00000223129	22.7568	35.3355	31.7517	33.4177	33.1999	36.4019	43.6389	41.9097	36.0335	25.1998	20.0394	30.6883	26.8076	28.6907
ENST00000263202	22.7548	13.0026	14.4627	13.4678	16.7319	13.8874	16.7911	18.8502	16.1393	17.7893	20.1259	15.1238	18.4014	11.2782
ENST00000360472	22.7413	9.09736	0.095204	16.1523	0.192034	13.8522	2.76963	10.3365	5.2802	2.74837	2.2615	12.0159	4.9313	7.59544
ENST00000301071	22.7405	31.5775	37.5033	23.3036	32.1701	33.4017	29.0647	32.2886	16.1365	21.9871	26.5983	26.0693	23.6887	30.8021
ENST00000644684	22.7372	0	0	40.9991	48.7631	0	68.6081	0	0	191.613	0	17.3201	0	0
ENST00000418476	22.7312	8.64313	11.0876	9.69201	16.4106	14.0602	16.034	17.3152	10.0297	18.6739	22.8971	14.7984	13.5107	10.1948
ENST00000391932	22.7279	11.2282	4.08687	32.5182	6.69074	10.4158	9.94171	6.49501	3.57018	18.7896	24.7919	11.224	5.71021	2.83112
ENST00000254480	22.7255	6.13986	9.09855	7.72905	9.78458	10.2958	7.23933	8.31181	4.13019	5.48169	11.0702	9.39922	11.8287	7.19199
ENST00000233575	22.7222	11.0521	16.4013	14.8155	20.0919	20.2214	21.1422	20.0892	13.7253	14.6773	18.8895	19.598	21.7847	16.0248
ENST00000356692	22.7204	13.1955	18.1087	21.1623	18.1235	15.2657	7.20952	7.20992	14.2542	21.1761	19.7552	15.3645	17.1173	13.2788
ENST00000296666	22.7161	8.98856	11.2148	10.4764	8.85609	8.81151	7.72813	5.54021	6.78398	9.46163	8.05337	8.55417	11.3248	8.51832
ENST00000597017	22.6835	6.072	9.63699	10.8143	26.3137	9.48019	10.4735	14.9234	9.45089	30.9731	19.0845	8.85134	16.9987	6.56803
ENST00000610432	22.678	22.4168	22.4465	22.5968	22.9932	21.6931	21.1807	20.1552	17.3637	16.6966	17.212	22.5212	22.7118	22.6289
ENST00000359308	22.6364	26.3294	30.2223	37.3893	36.8764	24.6195	25.3912	29.4209	35.3601	34.8591	32.2167	29.1931	27.7964	17.4288
ENST00000235310	22.6349	25.6526	27.5282	27.8422	28.6846	23.4799	33.2356	30.7346	26.6814	32.1535	27.3455	19.8375	21.7902	23.0925
ENST00000225665	22.6283	24.2943	27.4837	25.599	33.0231	35.1786	33.6822	32.8999	24.4143	31.3002	30.0099	32.2055	27.9335	25.4333
ENST00000246069	22.6225	1.12431	2.42405	6.48779	3.00385	9.15732	7.79291	3.15117	7.02273	9.6267	0.476496	1.54483	1.71468	1.29139
ENST00000217131	22.6218	4.42312	8.057	7.79362	9.05756	12.0841	8.43712	11.4112	7.81366	14.3079	18.0463	18.143	16.1569	12.4898
ENST00000319285	22.6205	31.6808	38.3952	38.9542	40.2177	27.1662	35.6719	40.8395	43.766	58.6932	30.2323	48.2821	35.6094	26.919
ENST00000372972	22.616	15.7686	16.8217	18.736	20.4434	17.2903	18.7696	17.2131	14.7133	25.9776	20.885	15.3404	18.2522	9.38151
ENST00000275036	22.6121	31.2307	30.3366	33.0519	34.7649	36.6594	40.6117	31.9342	23.5145	20.5221	20.6787	31.2703	29.4835	28.4011
ENST00000514213	22.6041	10.5531	13.2575	13.4248	12.7696	13.264	11.4309	10.599	5.79534	6.3629	15.0597	13.7569	13.7869	13.9271
ENST00000260731	22.5963	9.75512	19.2615	22.5946	15.5607	19.9949	8.67515	7.39088	8.25052	18.4556	22.8802	11.6212	16.96	8.60488
ENST00000292147	22.5955	15.6596	18.1442	23.2223	19.7182	18.1898	21.2606	24.4123	15.9255	17.8817	13.8981	19.9409	14.6885	14.1218
ENST00000361227	22.5608	56.594	62.242	72.8519	30.3811	44.6779	43.3294	46.3734	12.923	29.0351	25.7671	34.7564	31.1651	37.0459
ENST00000336273	22.5538	11.7873	10.1958	17.2609	17.8764	10.0283	12.5288	7.63299	4.97602	7.11302	13.9042	9.58327	14.0107	4.27349
ENST00000300648	22.5535	7.88823	10.9233	9.76341	12.1223	10.5578	10.5251	11.8898	8.4057	12.3432	13.4917	11.1009	15.2206	8.08137
ENST00000267103	22.522	22.8292	25.2605	26.8476	28.9432	23.9112	25.9859	20.6205	18.8637	31.6942	27.2901	23.9483	22.305	18.2683
ENST00000400000	22.5206	23.5733	24.2329	30.5411	27.5593	23.076	15.9898	11.4083	14.2635	24.4388	24.1436	20.8141	21.0051	18.8284
ENST00000374612	22.5044	6.44993	11.3491	12.7397	9.53235	6.29192	2.96936	4.98062	2.20387	5.11216	10.6548	5.2448	7.3811	1.66052
ENST00000234170	22.5043	11.451	15.6276	13.9977	16.5642	12.9288	9.50299	15.9321	25.5466	28.52	22.4564	15.1167	16.5952	10.8278
ENST00000416889	22.4895	16.1344	17.6533	19.6934	21.5083	19.9173	18.7965	18.8976	13.2719	17.1969	24.6417	18.1761	19.1473	18.0507
ENST00000434372	22.4892	43.1424	42.1122	48.8093	56.3266	40.6633	67.6733	78.6022	95.4765	115.429	92.789	64.3838	44.2478	34.6757
ENST00000372360	22.4831	19.7428	24.1259	1.95247	0.2024	0.045813	24.5822	16.5826	0.111255	0.547289	1.54417	3.06644	111.652	0.036976
ENST00000338369	22.4769	20.8099	22.1135	20.7202	23.5666	24.9139	29.1315	26.4009	20.3563	24.1761	20.8733	20.1351	18.7052	12.8029
ENST00000528655	22.4756	27.6689	11.6764	71.2216	23.6523	47.1713	9.41835	45.9151	48.7267	39.287	21.3312	9.70974	19.9692	7.14849
ENST00000215793	22.4609	6.5995	7.20815	7.96819	8.36317	7.31931	9.86677	11.141	6.87186	15.6013	17.2615	8.94552	13.0398	6.25577
ENST00000372447	22.455	18.8924	18.6396	19.3303	25.2742	19.8687	26.0818	30.19	27.4845	36.9459	24.7857	21.8601	24.4364	18.1917
ENST00000316804	22.4414	0.757784	1.59363	6.2795	7.80934	6.4758	4.14093	1.00292	3.71729	8.30405	2.45795	5.90815	10.4142	4.22563
ENST00000318348	22.4274	11.4663	18.1644	15.9518	18.809	15.7149	17.1572	15.5367	10.9656	17.7949	19.5094	17.8391	20.1335	13.4263
ENST00000299705	22.4094	25.4994	27.0948	28.8213	31.7777	27.6251	19.9953	33.9094	31.9031	35.4499	29.1915	31.0909	30.5112	28.8412
ENST00000390658	22.4085	13.652	14.8834	19.1904	27.7942	22.1938	26.594	31.7983	41.3952	56.2002	31.5919	21.3086	20.7717	15.7163
ENST00000468084	22.3495	25.2333	27.8341	24.0039	33.2393	23.1978	33.8102	41.4205	37.182	55.9744	35.6014	37.0725	31.971	17.4701
ENST00000360001	22.3364	15.8257	16.3783	31.4633	21.9442	35.2062	22.3986	22.6286	21.624	51.8352	20.587	22.2882	19.0214	19.0291
ENST00000219169	22.3045	29.0453	29.535	28.6603	29.8778	27.4266	34.9795	38.0918	32.6727	34.6017	27.9561	27.3408	22.7114	26.919
ENST00000517562	22.3021	24.1379	23.6338	24.5158	22.0595	24.6467	21.133	15.2538	9.51727	12.7362	21.0006	24.3491	19.4375	21.4966
ENST00000346249	22.2765	22.6918	14.8662	35.5967	35.0715	21.0835	15.8809	33.4757	32.2263	20.5168	27.0085	16.687	30.5348	24.7709
ENST00000646125	22.2661	6.21925	4.79859	4.79692	14.937	6.05805	9.11797	12.1349	8.60755	4.35424	4.84056	7.20237	5.81728	7.75717
ENST00000264718	22.2336	20.2296	23.52	23.8247	22.0017	19.2826	19.9641	17.4585	16.3215	22.1471	24.4354	9.65356	19.0399	14.1605
ENST00000262027	22.2071	0.254304	2.06301	7.19385	6.33811	0.249128	1.70003	7.48325	1.10347	1.61134	2.8131	0.891744	9.65873	3.06194
ENST00000081029	22.1676	21.3621	26.9397	21.7543	26.4509	20.9458	18.0058	13.7696	17.5529	22.4107	24.9778	16.9613	25.8752	18.6065
ENST00000569842	22.1554	5.1956	10.5354	10.9888	11.0402	0.186617	0.001087	6.136	0.001713	0.385034	12.8507	10.7972	11.8617	0.530019
ENST00000258083	22.137	19.6852	21.1587	18.2662	19.381	19.5138	25.9075	25.4291	25.7293	24.1771	16.1912	15.8888	16.6279	11.738
ENST00000267750	22.134	12.9596	21.0212	16.3993	18.6614	15.4075	10.7192	12.2382	7.43917	20.6121	18.4302	14.6134	17.2965	11.5013
ENST00000265343	22.0721	7.41854	8.88386	7.90259	5.86696	5.76617	5.48889	5.78289	4.70986	10.4277	15.3957	8.26727	11.1013	7.22067
ENST00000235329	22.0481	10.4143	12.3156	11.8284	13.2481	11.5577	11.8318	13.1062	10.7409	17.9408	18.2013	13.353	17.0229	8.38992
ENST00000368010	22.0292	13.8081	18.3873	18.3445	18.5343	15.6105	21.9328	20.9702	15.474	24.4731	27.8162	27.762	27.6245	22.7134
ENST00000273047	22.0049	0.450995	0.604566	18.6797	5.22032	4.24193	11.919	9.38959	0.312229	8.85345	24.3563	16.1706	18.9287	5.446
ENST00000453096	21.9891	14.8058	20.5851	20.6352	22.7946	17.1488	10.8107	1.54846	11.6037	27.8033	22.247	12.8942	15.3835	9.28697
ENST00000375344	21.9867	5.37287	10.4413	9.77628	8.69841	8.57859	5.88287	6.98816	4.77223	8.95469	11.7456	7.72073	12.9828	6.24094
ENST00000311893	21.979	25.4293	20.8285	23.2084	28.8581	27.7112	31.3761	35.7677	27.2289	35.2547	32.1127	30.8614	26.3149	27.4493
ENST00000645523	21.9477	40.6818	36.9433	30.0814	19.8487	21.7684	55.3753	68.9961	32.3538	73.7866	45.8235	52.589	36.2794	32.5809
ENST00000239231	21.9415	4.96685	9.51743	7.66467	6.80561	7.9144	5.09787	6.96015	6.75375	10.4811	10.7106	5.46712	7.0607	5.02313
ENST00000373477	21.9323	12.4394	9.80562	12.6942	17.0231	15.6994	15.6651	9.21793	8.80469	14.1238	13.4896	14.4106	18.0921	9.83513
ENST00000334220	21.932	8.79518	9.06915	10.9068	9.58288	10.6332	11.3321	18.7507	10.5053	18.8553	12.9514	9.53007	12.4495	8.98118
ENST00000622306	21.9264	7.71444	13.0352	10.2778	9.2523	12.7437	13.4053	13.1535	8.6204	10.7683	13.2944	15.8588	17.4456	11.3643
ENST00000265361	21.9245	14.7212	24.9774	21.7319	15.6709	12.9157	13.3803	11.9744	7.11711	6.66219	11.321	18.4171	20.644	18.157
ENST00000338193	21.915	24.2581	11.1276	16.462	22.9744	10.8284	9.62315	12.4293	17.5986	5.62087	13.4879	20.7667	27.8036	23.8177
ENST00000378578	21.9043	24.3292	21.6788	20.9284	18.77	21.1813	26.1513	25.0377	20.1084	18.9471	16.1994	20.4399	18.4392	20.5363
ENST00000342374	21.8923	14.9616	17.9874	17.5101	18.271	19.9595	16.6565	16.5336	12.3264	14.5139	21.3166	22.269	20.7845	22.8349
ENST00000230640	21.885	8.78976	11.8835	13.6845	15.9322	12.8835	10.3676	8.3225	5.69366	7.98805	15.1308	12.6494	14.4205	9.67204
ENST00000543959	21.8714	15.0703	16.7814	18.8844	16.6276	17.4291	21.6822	19.0839	16.7447	22.0453	18.4452	12.8758	16.6709	8.71875
ENST00000404724	21.8699	9.28463	6.72974	5.85024	8.50345	10.6634	16.3661	13.9236	9.92681	10.6363	7.57928	8.95529	10.8336	8.13604
ENST00000405202	21.8686	25.3161	32.2945	33.4447	30.0986	24.1971	0	18.4834	19.3569	20.3919	0	27.1202	27.694	23.2131
ENST00000381344	21.8519	19.9673	20.2976	24.3327	18.3403	16.8696	20.5258	22.3915	16.581	16.3729	15.4656	10.9232	10.7434	9.46545
ENST00000403425	21.8474	10.5566	76.4063	65.0634	89.3587	54.1804	57.1061	17.0983	46.0221	40.5913	10.6005	16.0609	66.552	17.8835
ENST00000222374	21.8382	6.47914	10.0136	8.18424	10.4441	11.0571	9.84206	14.1788	9.39381	12.5495	15.3099	12.7669	13.934	10.1285
ENST00000354811	21.8111	3.01919	2.505	3.39943	6.91237	6.78887	37.8796	13.9322	12.3174	39.7072	16.6158	1.16069	2.39269	1.94697
ENST00000254821	21.8085	14.8302	14.6633	15.6341	9.34345	13.7188	15.4761	16.1037	5.69834	8.88721	14.7984	16.7863	14.5118	15.6161
ENST00000216122	21.7556	14.1468	11.6929	9.14248	20.7155	19.5091	24.0608	23.6549	21.3267	22.7015	14.1092	20.6612	21.7586	16.9703
ENST00000357480	21.752	6.92499	11.4945	11.7992	14.5701	13.3593	14.6747	15.4575	13.7034	21.2224	15.8803	14.0893	19.1319	9.78505
ENST00000376387	21.7493	28.463	32.1588	27.3016	28.4788	18.9821	28.151	25.8488	20.0239	13.9856	32.2228	29.9636	22.9438	22.0326
ENST00000306442	21.7341	10.7733	10.79	9.82005	11.0905	14.0796	12.4302	13.8952	9.95574	12.9038	14.1151	15.4181	14.6376	12.2808
ENST00000216254	21.7322	9.16953	12.0945	10.652	10.1466	10.5338	12.7752	12.989	8.41199	9.31296	9.9609	10.0231	11.6922	8.01818
ENST00000318121	21.7134	4.53591	4.24127	3.41173	5.4821	4.67235	6.40305	8.50652	7.23957	12.1483	9.95974	3.75391	7.79878	3.20522
ENST00000372257	21.7103	20.3183	12.1876	25.5711	24.6682	26.1722	25.4307	20.2463	14.3258	10.7883	7.9128	17.7732	24.4241	13.7969
ENST00000344036	21.7028	4.70646	1.76082	9.37172	10.196	9.51047	3.86686	11.2586	7.2431	2.13324	15.5924	8.85565	9.30255	5.48561
ENST00000233146	21.6898	12.6883	10.1441	10.6312	8.55347	12.868	8.96085	24.6685	5.03694	10.2594	10.5203	13.8201	12.1466	12.6731
ENST00000424014	21.6808	15.9932	18.1729	16.7901	18.7745	15.8267	21.5122	27.1585	20.8026	27.126	18.9036	15.5639	16.6469	10.4381
ENST00000311189	21.6711	20.5627	22.9694	22.9099	25.771	22.7046	30.36	27.9526	21.907	25.7748	22.4004	25.2983	23.858	17.475
ENST00000407627	21.6493	10.1808	12.0279	12.8102	12.1223	10.2421	11.5257	11.5803	7.64157	11.7323	12.345	9.90212	11.715	7.95369
ENST00000532642	21.6445	24.5337	23.7566	26.7447	22.1991	22.5783	40.8848	35.7452	37.4305	46.0436	40.3622	28.5853	25.7557	17.9074
ENST00000521861	21.6247	23.6289	25.8356	23.6697	3.91857	34.7793	32.8861	23.9749	25.2961	26.174	23.7823	26.9618	23.3348	27.966
ENST00000230990	21.6121	50.59	11.0227	9.00739	9.9895	11.0772	66.7996	72.8228	33.4248	30.2554	27.5181	22.668	11.978	10.2708
ENST00000374647	21.599	4.97485	7.80234	8.63858	7.0426	7.92339	9.09985	9.52822	4.40334	8.65576	15.2628	6.32576	9.01745	4.37579
ENST00000304658	21.5909	15.7861	24.3177	23.2516	17.2097	16.6267	12.8744	9.00171	9.25906	16.1732	19.3026	18.6101	22.6589	19.6293
ENST00000373622	21.5688	37.0336	22.4009	40.8069	25.8247	39.0859	38.5255	36.9672	31.0493	33.8826	38.0498	27.987	26.9762	46.4412
ENST00000434937	21.5284	22.4012	14.9645	12.0379	16.4192	20.6679	47.8371	50.8956	49.8175	58.7779	49.2095	26.8152	20.8493	17.798
ENST00000448110	21.5143	10.2078	9.51377	10.2539	13.4428	16.8488	17.0438	16.6086	29.3919	24.1856	9.5449	6.60154	13.8692	17.7556
ENST00000264634	21.4963	12.9743	14.6689	11.1064	9.47823	11.7947	10.053	13.3081	11.4932	14.6218	10.544	8.37401	9.8692	7.77901
ENST00000371588	21.4886	30.1861	30.8594	35.2145	44.4488	33.0836	32.623	19.5636	18.9118	25.6361	32.2671	31.9942	25.5067	18.4425
ENST00000243563	21.4884	18.3222	17.665	20.2428	25.4626	21.0622	24.4738	22.9115	13.047	13.5435	18.331	19.4467	18.3047	19.2834
ENST00000305105	21.4843	29.6437	31.1037	30.9715	51.4693	44.8781	50.4655	61.0335	46.0038	45.8652	34.8201	49.0388	40.3736	43.433
ENST00000406376	21.4645	39.2807	41.2735	35.5042	33.373	33.636	44.5171	36.1573	30.6219	22.7216	28.3134	28.9098	31.8643	25.1747
ENST00000361335	21.4475	8.94727	11.1576	12.6889	6.69782	9.00467	8.47421	9.49502	4.10198	6.2161	7.02747	6.13372	6.25138	5.63991
ENST00000370509	21.4276	16.5261	17.2809	16.1981	16.0783	19.0421	20.1922	21.0055	18.1213	20.1861	18.1902	18.5766	20.5449	18.6083
ENST00000324953	21.3938	27.2092	33.317	2.57013	1.92392	18.7862	18.3758	20.3406	2.0804	31.4796	10.7147	28.8413	36.6209	11.6246
ENST00000290649	21.3924	11.3561	13.396	13.3182	23.6017	21.6822	23.3185	20.0286	14.0228	15.5873	18.5735	21.2236	18.3364	20.2957
ENST00000223324	21.3788	27.851	37.7307	40.9437	34.719	23.8506	27.7647	39.0461	53.392	59.5702	45.4669	33.2392	29.6172	23.5991
ENST00000226225	21.3732	16.4098	17.2732	13.6526	13.437	15.3683	14.7251	15.7532	20.8385	29.8941	20.6134	19.0449	15.913	14.5234
ENST00000370521	21.3647	6.57185	13.2469	14.5943	8.59962	9.78203	11.4099	4.97978	2.75019	6.18502	16.6721	10.1188	10.6165	8.66469
ENST00000264716	21.3602	12.9017	13.8124	3.57064	11.3571	13.7786	5.80573	14.9051	12.3555	16.7032	19.8106	4.73448	15.5964	12.8261
ENST00000285735	21.354	0.36286	12.6032	0.377512	0.118311	28.1891	0.566662	0.274635	0.098832	0.200388	30.6778	34.6369	0.713811	0.242421
ENST00000262460	21.3537	17.0339	18.1729	14.8233	6.74987	20.2603	15.0317	6.47613	3.78344	11.3342	7.2139	18.9736	22.8783	15.9197
ENST00000266079	21.3518	5.43148	8.86704	8.30612	11.8758	10.9771	8.82772	7.7269	5.91359	12.4221	19.3561	9.20619	14.9408	6.67457
ENST00000356509	21.3301	14.3753	17.9776	18.9861	20.5284	13.2038	19.809	10.4753	12.1902	23.9584	11.741	12.8238	14.7068	11.298
ENST00000379751	21.3178	21.9474	19.3452	19.2686	26.4359	25.1096	23.7788	20.8059	22.3847	23.4533	20.8151	24.8676	29.1136	20.7649
ENST00000445930	21.3125	14.1785	15.0065	13.8408	12.4508	15.3942	12.9112	9.05083	6.72057	12.8901	11.9026	10.1946	13.7456	8.83634
ENST00000350028	21.3042	19.5145	21.1612	20.5235	21.0508	19.2076	22.6143	17.1029	10.1435	17.3132	22.8243	19.771	19.8038	15.4261
ENST00000457408	21.2767	14.0039	16.0859	14.0808	19.1195	17.9966	20.0045	23.7266	19.7963	20.5836	16.4655	20.8313	20.7138	20.8685
ENST00000380943	21.2534	25.3331	23.4577	19.0356	15.606	25.5563	0.529429	4.41228	3.04717	3.78722	20.0501	15.1488	12.4555	14.819
ENST00000520271	21.2479	21.8259	12.6139	10.8561	16.5244	12.7539	13.2989	16.2971	23.3262	16.0346	19.9698	20.7321	12.7212	9.52787
ENST00000617122	21.2374	83.3068	51.3015	41.906	74.2971	56.648	78.7893	118.018	248.716	88.7491	40.8446	82.7934	45.7252	53.3684
ENST00000398153	21.2299	20.476	24.9874	25.2065	27.6901	19.1313	24.0398	20.9921	15.5644	15.5354	26.7915	27.6289	25.6739	21.8125
ENST00000374403	21.2181	11.8546	19.0379	28.3455	26.4987	22.536	12.1164	10.2427	7.77391	14.2502	28.9883	16.895	22.5773	12.1987
ENST00000381334	21.1917	11.2384	17.7178	19.649	12.5404	12.5591	6.24053	5.44046	8.59026	10.4748	14.9144	13.2175	16.7382	6.85323
ENST00000396068	21.1708	14.8939	31.9426	26.1376	22.0832	21.3282	9.68451	12.3896	14.2605	22.6143	18.5783	9.7401	15.6922	12.9736
ENST00000619601	21.1533	19.9101	22.2204	12.9385	6.91168	10.1078	11.9907	10.8944	10.7963	6.82897	6.00898	6.26027	10.2376	14.4393
ENST00000409293	21.151	23.6185	25.7517	26.4895	31.5379	23.5441	29.6779	31.5923	32.1836	44.5634	32.501	24.5041	24.4434	14.4958
ENST00000335972	21.1439	15.8334	18.4809	17.5045	23.7467	19.8019	20.8763	23.8752	20.3035	24.9628	25.8241	21.3542	20.7934	21.1007
ENST00000402693	21.1414	15.0772	11.7824	12.1518	16.5586	14.9219	15.621	14.7949	16.3144	17.322	12.832	19.482	17.5063	15.1406
ENST00000398019	21.1383	19.187	22.1761	19.9139	18.4865	12.3774	22.9378	21.2522	15.9772	12.6729	17.0877	36.4211	29.2508	28.2571
ENST00000487273	21.1365	9.40602	12.3516	11.653	12.1699	13.4493	10.641	12.2859	7.76997	8.73145	12.9433	11.0259	15.3608	10.7863
ENST00000441998	21.1292	2.56263	7.19278	3.87763	16.9211	2.77597	48.7889	25.2819	12.6094	3.40462	3.19628	3.43747	12.8954	11.3033
ENST00000398073	21.1182	9.49626	9.19753	11.0355	10.6302	14.2231	7.44468	6.3567	6.40113	13.2767	13.2711	11.9477	15.016	10.2956
ENST00000373001	21.1142	3.78579	6.13766	6.29569	4.96216	5.31496	5.30639	6.97396	6.64822	13.3256	17.9271	7.03344	11.7075	4.86863
ENST00000378756	21.0916	16.7204	22.4195	19.6909	28.1537	16.6113	22.36	12.8882	17.0485	7.20801	23.9741	23.1367	7.91649	13.4005
ENST00000552981	21.086	25.9137	60.8806	34.462	27.9224	24.9235	30.5603	34.3547	44.7401	48.7854	45.9577	23.0081	32.3567	25.8616
ENST00000538442	21.0828	11.1139	13.0056	13.2191	13.3106	14.4145	12.0375	16.2354	20.0459	30.2813	26.9414	21.0547	18.3709	16.4343
ENST00000318950	21.0819	3.58127	6.03115	6.48675	6.39958	7.05067	3.47856	3.67306	3.36699	7.68231	12.3486	5.52726	9.23272	3.67054
ENST00000376936	21.0702	16.9866	16.4481	10.9655	17.1605	18.2748	11.6818	13.4293	9.02931	13.1816	26.0217	9.25443	11.0914	6.21204
ENST00000592558	21.0633	25.104	31.809	28.3284	34.7001	28.4908	30.225	28.6318	21.2085	21.3117	16.6124	24.881	23.9521	21.6182
ENST00000357360	21.0273	28.5892	27.5475	26.6721	26.6712	29.7946	38.0772	38.6153	35.4179	35.8745	25.3116	21.7341	21.7119	21.8255
ENST00000442551	21.003	23.9517	22.6182	0.396529	14.662	14.0982	22.9919	0.233591	0.213525	1.98109	12.1921	0.218563	0.110675	12.0457
ENST00000380118	20.9933	18.9192	27.7209	20.2891	27.6086	19.6908	15.7036	19.3862	13.4709	14.911	13.9208	15.4793	14.9438	17.8324
ENST00000339399	20.9636	4.08684	5.17951	4.5314	4.50846	4.52647	5.27471	6.61235	3.82031	8.73538	9.33535	6.1967	10.0992	4.54504
ENST00000397149	20.928	15.7013	17.3768	18.4108	21.525	17.2243	16.1212	14.7711	14.2267	19.4879	22.5374	15.3813	16.4514	12.0768
ENST00000381346	20.9202	24.6241	25.7646	27.8882	29.886	26.244	26.7269	15.9013	13.7169	21.5968	17.1523	20.5486	22.6057	17.8716
ENST00000439174	20.9195	8.91087	12.1949	10.587	8.00926	9.31972	5.07377	7.52841	9.26194	12.4485	11.3299	7.51009	9.23982	7.13696
ENST00000373463	20.9126	21.6443	24.0915	21.1421	18.6143	22.2933	21.5206	27.8844	22.2307	22.8715	24.1958	19.2287	18.7962	23.4533
ENST00000376772	20.9053	14.4842	17.9659	17.0572	14.1135	16.5338	17.4911	17.3047	11.5974	15.386	19.111	15.4506	16.8398	12.3329
ENST00000409333	20.8915	11.0131	13.3576	13.5349	17.8325	15.9736	1.92723	9.73682	5.88591	13.2808	13.421	14.5124	7.32958	11.4259
ENST00000265094	20.8753	0.45937	24.1139	25.464	0.009861	19.7036	0.235871	5.7779	6.52682	10.9435	0.045305	20.6679	21.7424	20.6723
ENST00000298299	20.8742	16.3496	33.2013	32.6766	33.8432	34.2096	15.6687	17.0174	24.2737	27.4875	21.3853	26.921	25.4236	23.2293
ENST00000398316	20.796	10.8232	15.4662	15.5099	12.3277	11.7362	7.3276	5.40841	3.88752	7.69554	22.2953	18.0463	18.4342	13.5737
ENST00000305386	20.7859	26.9209	39.6621	45.669	35.7137	34.7654	26.6121	34.8337	42.3857	41.6892	26.3481	29.0021	30.5314	20.7056
ENST00000269373	20.7775	7.06841	9.98105	7.57262	6.1278	2.15471	9.09234	12.9704	10.7809	17.129	8.26007	6.55564	7.54237	5.04464
ENST00000003100	20.7612	16.8761	19.7879	19.3454	20.0702	15.2256	15.5439	14.7343	13.7761	16.5525	16.3197	12.4766	11.4215	9.3045
ENST00000374767	20.7533	25.8498	24.538	24.75	20.2462	19.6292	26.038	21.2559	13.5714	13.2452	15.0251	21.1476	15.5341	17.182
ENST00000527958	20.7399	16.8391	20.5609	20.7373	19.9602	18.9508	12.2946	10.5562	15.8977	21.8341	16.1628	14.9446	16.2501	13.3981
ENST00000366899	20.7081	18.7493	37.2364	21.6894	13.9198	12.3536	4.92757	9.43393	9.35656	11.8145	11.3764	13.8557	14.2348	10.9584
ENST00000647545	20.7063	53.1608	26.3322	51.2128	89.2766	69.1072	51.1507	102.517	107.534	99.6449	77.0305	103.212	7.5265	175.532
ENST00000271688	20.7005	14.278	20.2379	23.0572	26.9032	19.7735	17.6676	19.4826	20.9194	32.5228	31.4989	17.8731	18.8811	8.75587
ENST00000286713	20.6802	8.17868	13.1793	11.7395	4.5131	8.7458	8.04382	4.43343	9.73209	14.9559	20.9664	10.7665	15.4459	3.96324
ENST00000378198	20.6695	6.71556	9.3527	10.0832	7.07996	9.50281	7.57141	10.2386	7.37793	13.5736	14.5604	9.55192	11.8465	6.04748
ENST00000502346	20.6686	0.067165	6.86582	0.054836	7.17863	0.019679	0.072574	0.012098	16.035	0.089299	0.088631	19.0469	0.022992	0.066227
ENST00000366639	20.6498	19.629	20.1095	21.7463	19.5283	18.4853	20.0166	20.0267	19.9631	23.7011	19.8367	19.5864	21.2152	14.7169
ENST00000287647	20.6436	5.60221	11.5311	7.08026	7.44691	10.2492	10.8871	8.3202	4.98328	5.82263	11.038	6.37482	11.867	5.15559
ENST00000435644	20.643	13.0969	14.4927	16.2923	9.47321	15.8667	11.1967	3.35377	4.76095	9.15343	20.8897	16.7299	16.7831	15.1258
ENST00000649912	20.6375	17.6433	20.4935	20.6256	29.5666	28.2023	36.1627	30.5586	22.0495	29.0753	32.4151	46.441	30.7601	28.2715
ENST00000517309	20.6108	12.5932	18.3612	16.3517	20.3867	13.0729	13.5203	13.5926	13.743	14.4099	17.5252	14.1336	15.3093	8.81139
ENST00000524904	20.5936	20.9886	20.0754	27.1256	25.0381	22.764	19.2741	10.0297	5.15438	10.5646	24.082	20.0352	15.5488	17.0389
ENST00000439383	20.5841	8.39815	15.4035	13.896	12.2152	11.2056	14.8874	22.9799	14.4136	21.6401	23.6862	12.9955	19.8522	6.84786
ENST00000414262	20.577	28.4083	25.8208	19.9714	5.682	23.8404	28.6436	30.6922	25.7665	28.0158	23.0434	21.4206	20.7645	20.89
ENST00000066544	20.5601	11.9605	19.8307	23.4431	14.7432	16.7378	9.05394	6.9736	6.03755	12.2081	19.4844	12.5947	15.5272	10.3302
ENST00000367833	20.5589	19.0215	24.7587	28.1944	23.305	25.0485	20.173	13.6627	12.5759	19.2656	21.2277	18.641	19.859	16.5066
ENST00000295956	20.5585	5.88775	0.802427	3.35953	10.3884	4.15788	7.18431	5.83043	3.03617	5.27278	0.957714	3.79069	13.8669	8.14682
ENST00000368468	20.5584	14.0519	12.4508	10.5797	11.515	13.4416	13.1201	11.9021	6.62642	4.79452	6.82562	11.7673	11.2102	12.1685
ENST00000433351	20.553	10.1544	11.1121	10.5294	11.3751	11.1067	12.4117	13.5976	8.73496	13.1791	9.82454	9.61288	11.1021	9.3588
ENST00000368494	20.5521	9.2928	13.1032	12.3539	9.25274	6.53258	7.26088	6.66841	4.99642	12.2181	10.2679	8.67388	9.2645	7.22748
ENST00000647444	20.5459	8.67897	7.9478	7.81308	11.1732	8.26096	6.77287	10.2824	7.57549	5.27926	5.71371	7.05996	11.649	6.07515
ENST00000429178	20.5369	10.1157	11.3668	11.6087	10.2533	11.5501	12.0207	10.776	6.1255	9.89523	11.8498	12.6146	12.6611	10.163
ENST00000528011	20.5269	127.497	24.5607	21.4997	114.527	109.758	25.9753	1.94841	2.26775	129.276	18.3266	138.868	1.55603	20.45
ENST00000221494	20.5228	7.16588	7.18275	6.40392	7.04253	6.77825	13.9642	17.7629	10.1765	16.7587	17.1485	10.272	14.0405	8.10929
ENST00000338970	20.5226	33.4084	31.7532	34.6271	37.117	32.7266	38.098	34.7817	30.9319	29.5392	24.2089	37.0519	32.1941	32.524
ENST00000333651	20.5216	18.6294	27.3415	22.7598	38.8698	36.5478	33.7476	36.0202	19.7015	21.0719	18.3472	33.7329	22.8912	35.1906
ENST00000379463	20.5058	11.5014	1.0133	1.09942	0.93499	11.3662	11.0181	0.91789	2.24709	0.598343	7.05265	13.2183	8.92084	8.90681
ENST00000534871	20.4916	22.6153	36.4444	38.9695	15.189	26.4863	17.6207	13.8453	18.5858	37.0788	26.1588	25.163	27.7738	21.1223
ENST00000593052	20.4831	17.9399	21.4133	25.2591	18.5537	15.2524	23.6732	22.5305	22.5512	26.3993	19.302	22.6204	18.3557	17.8126
ENST00000562237	20.479	0.853781	9.14911	6.41629	6.51079	1.26731	3.23446	4.5846	5.15629	7.62505	14.1429	1.33936	3.78436	4.76823
ENST00000269321	20.4716	9.73141	11.9409	12.0318	7.24829	7.80478	11.6369	13.2106	13.056	13.16	13.3246	10.468	14.9879	3.0511
ENST00000605895	20.4678	17.3347	20.6525	18.258	20.8901	19.0439	27.1324	27.4265	26.9202	31.9618	17.56	21.1424	19.0688	16.7234
ENST00000278422	20.4677	10.6713	14.7981	18.2608	17.7233	13.4842	11.2864	13.7841	12.3486	20.6163	19.092	14.285	12.3538	9.36214
ENST00000511783	20.4645	1.01054	21.1331	1.57105	1.97467	17.866	0.662645	0.728843	18.5378	16.0134	2.09544	0.824755	1.76503	2.72218
ENST00000552296	20.4636	3.13149	2.33862	1.5985	1.49419	1.72549	2.31098	4.70687	1.50775	2.66505	3.01967	1.18352	2.24871	0.907784
ENST00000435041	20.4475	16.139	19.9166	20.3803	17.2563	12.9085	16.8589	13.8041	12.2567	18.8918	18.4999	20.5061	18.9017	15.1074
ENST00000370282	20.4325	12.2727	14.4462	16.9878	14.2068	12.7154	11.4913	11.2006	10.2518	13.087	12.7833	11.2406	13.5825	9.82482
ENST00000374514	20.4241	19.8327	19.3594	16.3364	15.6794	15.7705	22.9372	21.2799	17.2688	22.1987	29.4789	23.7353	20.4763	16.7539
ENST00000451283	20.4116	25.9891	20.963	22.2762	33.4108	20.7789	26.5828	25.424	33.8651	8.57857	19.2189	28.8245	11.0931	19.3207
ENST00000358506	20.4104	8.09215	17.5485	10.0704	10.7755	7.95506	10.7954	2.01517	11.2709	0	10.3209	7.88136	8.79677	5.69761
ENST00000290130	20.4	17.1111	18.9546	20.9116	20.2082	21.4286	18.6206	16.6698	14.8756	19.8533	16.0797	16.2221	18.3352	15.8335
ENST00000440191	20.3789	21.4987	21.9449	22.9012	27.5655	25.6839	13.9497	14.5423	30.8353	42.1801	28.4766	28.4099	28.7148	36.7052
ENST00000621158	20.3753	3.66324	5.18135	2.8741	3.19729	2.9919	2.42415	5.02947	2.44835	5.27809	10.4938	5.19977	14.6765	2.52181
ENST00000528164	20.375	8.63017	4.92692	0.984223	29.4078	2.13098	9.59078	15.2937	1.59585	50.2473	7.57476	4.4794	3.20554	13.1967
ENST00000612212	20.3666	29.5871	35.0383	37.6815	54.1689	36.6433	44.3969	42.0434	44.0099	62.3494	24.084	29.2493	26.992	39.3433
ENST00000647433	20.3229	1.95545	0.676185	2.70271	1.85933	0.103782	1.88144	1.3464	1.63416	3.90047	0.335329	2.47672	6.9284	0.315105
ENST00000499810	20.3133	13.2185	13.8684	9.11008	6.5457	12.0311	10.2071	10.512	8.9452	6.25182	5.97698	3.89724	9.90612	6.22183
ENST00000350498	20.2944	18.363	19.057	18.3726	21.1879	17.3546	27.2907	23.7359	17.0127	24.3834	18.3852	19.6463	18.5844	13.5049
ENST00000490574	20.2899	0	12.7325	14.513	2.01066	9.93518	8.57385	0	0	12.6768	17.2085	3.52951	12.1329	9.33829
ENST00000261813	20.2788	26.3778	27.3184	27.6406	27.9334	31.1027	24.3922	16.5054	14.8114	23.2852	27.0771	23.2135	21.5051	25.2801
ENST00000303004	20.2645	21.3296	15.0778	16.1271	20.9796	21.1528	18.7698	20.9699	22.0342	31.5867	25.6071	28.3835	26.908	23.4433
ENST00000392623	20.2347	18.439	18.4089	89.3867	22.1864	16.898	25.6052	20.9671	4.12864	24.1383	15.186	19.4997	20.5248	15.4469
ENST00000394201	20.2165	16.5285	16.6103	17.1413	12.8676	16.9917	19.1361	19.1245	15.5953	14.2994	11.0155	16.2804	18.0871	21.2461
ENST00000540494	20.2157	5.55155	13.0563	9.46895	20.6447	10.8778	10.5982	0.027807	7.29973	7.41506	8.14328	10.2558	21.8079	9.23347
ENST00000354480	20.2114	26.0886	23.8131	34.457	32.0122	23.4889	35.6556	25.0608	18.4234	31.0956	19.2505	16.7859	25.2634	14.2201
ENST00000330263	20.1974	1.86324	7.38272	4.80914	9.27265	16.48	4.38929	5.27826	8.31508	11.8958	9.34721	6.63436	8.83231	3.74475
ENST00000299092	20.1943	16.5202	23.7676	23.3714	20.598	13.516	9.05892	8.07408	8.50386	14.1792	16.7978	15.2577	15.9044	14.1161
ENST00000225719	20.1835	12.9286	14.5707	14.1159	14.2378	13.4657	14.4109	14.2945	8.99159	11.2248	12.1293	11.978	15.1925	14.3594
ENST00000394894	20.1687	20.1293	69.908	143.721	137.094	97.7116	18.9486	18.446	27.8351	73.2169	124.346	47.4175	57.2131	36.6915
ENST00000216802	20.1601	22.0336	28.8107	21.1111	28.6833	34.7228	38.249	30.6027	46.3933	51.4613	55.9087	36.5594	42.1601	31.972
ENST00000409600	20.1573	18.2243	23.6815	25.1119	23.2349	17.0057	17.0996	22.0998	20.7896	28.3359	16.8975	16.3971	18.0002	14.3619
ENST00000394456	20.1542	17.5985	18.5868	21.2855	25.8465	21.6306	22.1336	23.9965	20.496	33.7382	35.661	23.8495	23.8052	16.0286
ENST00000375068	20.1336	0.971619	6.04472	5.91424	5.10343	0.58777	5.40487	10.2236	4.83473	0.403432	0.423294	1.48694	6.91405	0.811866
ENST00000301843	20.1216	10.1123	13.8518	11.9113	13.8846	25.0068	10.4189	12.972	9.47632	9.76986	18.7905	17.4764	20.9794	13.5248
ENST00000301457	20.1084	29.6003	31.6201	31.1086	30.4093	24.5542	40.2126	43.9426	37.1043	40.1957	25.8822	34.7466	24.4743	29.3376
ENST00000300574	20.106	2.27457	3.23143	4.63781	14.1071	10.8733	2.45923	3.40973	2.24614	8.12124	5.3404	10.4941	9.7592	7.24437
ENST00000393888	20.0948	4.35839	6.39204	5.28783	0.108448	5.9539	5.36665	8.24954	5.94916	10.2203	11.1527	6.20291	12.0726	0.11045
ENST00000621232	20.0834	15.2889	16.8346	15.3372	16.0815	17.5414	18.0109	8.35598	14.0096	11.8308	17.7616	16.1683	12.4298	13.638
ENST00000466490	20.0726	26.2435	34.5768	34.1322	35.9121	23.8702	27.5802	30.6285	39.6118	49.8925	35.128	27.8565	26.5625	18.0812
ENST00000334047	20.0686	67.9682	33.6879	21.4042	14.2499	12.8014	12.6925	24.2762	12.0429	13.243	28.4866	42.8235	35.5364	28.193
ENST00000369552	20.0546	16.1419	9.97793	16.2945	17.1815	22.1565	12.3836	10.7619	9.99732	18.3324	18.618	19.7064	17.8004	16.7665
ENST00000579374	20.0511	2.25772	26.3576	29.9379	4.83969	28.6529	0	10.3418	0	0	4.72179	0	0	24.3518
ENST00000221419	20.0425	5.41204	8.20286	7.26303	9.18638	7.58948	7.17821	9.62801	6.05308	6.74868	10.6759	7.11661	11.1293	6.20798
ENST00000263774	20.0321	19.3376	21.5564	18.9866	26.3227	20.1594	31.5072	30.3849	23.1061	25.9551	26.159	23.0404	23.4557	17.9118
ENST00000395734	20.0309	9.88201	3.57701	7.97627	0	6.06928	6.24877	0	0	0	6.11212	0.149919	10.562	8.52948
ENST00000262238	20.0208	5.96118	12.4626	17.4437	16.7857	13.1183	3.45102	11.8984	10.6993	23.0797	9.86058	8.79156	8.89451	9.48476
ENST00000372622	20.0168	4.09376	7.60061	6.10977	4.22103	4.86904	3.44731	5.88954	3.68412	8.77516	13.4897	5.29307	10.8531	3.1963
ENST00000446922	19.9853	14.7685	17.8811	21.2012	16.6759	19.9292	20.1207	14.7561	13.3285	18.3853	18.4537	11.8271	14.3626	6.85428
ENST00000270225	19.9849	12.7696	11.9097	11.0593	13.6622	7.24192	17.1535	9.6856	10.4631	10.3963	6.45563	3.85662	8.84185	7.60339
ENST00000242784	19.9837	26.2357	24.5305	21.0005	41.2393	40.0415	55.6875	58.3682	54.4521	86.3565	40.7926	43.1064	39.7575	36.8335
ENST00000283195	19.9745	9.58035	13.8749	12.3867	13.3288	10.5944	7.79747	8.36721	8.14903	16.0516	20.2682	9.50077	12.4443	7.63911
ENST00000504396	19.9694	8.47217	10.8763	7.08418	5.80441	9.62267	12.0814	11.5467	7.4595	7.25426	5.14692	4.05384	7.38729	5.76995
ENST00000300086	19.9473	16.3537	16.0224	15.7841	21.5152	19.1106	25.5007	31.277	30.2281	36.4778	30.8996	26.5216	25.4073	20.0142
ENST00000303319	19.9447	27.5857	21.0653	24.6618	41.6479	25.1082	22.3211	14.6096	4.64303	11.1819	22.6647	36.332	23.8881	30.9596
ENST00000302422	19.9317	71.6058	27.5385	79.4657	53.2565	44.2936	49.7208	52.3927	46.8116	60.2228	49.6244	59.5857	79.562	62.2627
ENST00000369236	19.9301	0.017702	0.00825	0.034533	8.45584	1.0077	6.89131	9.08136	5.87798	7.16558	0.000936	0.016242	8.21711	0.017103
ENST00000397195	19.9296	6.62386	9.94446	10.8863	11.1106	9.74139	6.15055	3.92875	5.61955	10.4618	12.6621	8.21602	11.0182	6.77266
ENST00000455976	19.9272	32.3387	13.9719	13.9272	19.5169	30.8281	30.3762	31.2778	17.9476	33.2899	16.3732	23.6464	14.5969	13.9644
ENST00000308508	19.8865	9.39273	12.6658	11.897	13.8466	11.9989	11.464	10.5322	6.85553	5.95443	6.91458	16.4426	19.8483	13.3399
ENST00000374864	19.882	12.7557	10.6363	8.45753	13.825	9.69481	8.25461	3.2659	3.19693	7.23547	13.1925	7.37153	14.3343	7.36374
ENST00000284987	19.8502	8.18468	9.795	6.99147	5.08324	5.25456	4.85944	6.30859	5.0747	9.57604	10.2693	7.13314	9.22104	3.83116
ENST00000533608	19.8442	14.2221	15.9536	18.197	25.1279	35.9137	15.7479	21.3852	13.4037	12.6405	11.8262	18.9911	22.6044	25.0591
ENST00000391945	19.8339	13.6187	15.9422	12.1614	17.6539	15.3647	16.9071	16.5474	11.0975	13.8861	17.1821	23.4272	21.4108	17.7668
ENST00000259526	19.8288	15.0093	18.4859	15.4284	14.6242	14.2144	14.8709	16.0189	19.0639	25.3776	25.0814	23.4057	24.0164	18.0819
ENST00000262713	19.8105	3.84618	6.17509	6.29291	8.69858	8.68432	3.41217	4.10579	5.9615	10.2904	8.57545	3.65762	6.42908	2.42409
ENST00000649662	19.7996	0	11.7787	0	0	5.83984	0	33.7944	36.7436	35.0204	11.8302	3.92543	0	2.56296
ENST00000242261	19.7986	18.9829	16.9948	15.6804	15.7396	19.5168	17.462	14.9045	18.4332	24.3874	20.8007	20.0881	16.7995	16.8134
ENST00000352301	19.7955	5.19989	6.5316	5.1815	4.56668	5.03041	6.58573	8.14534	2.64147	3.99971	7.51168	5.94812	9.14012	3.32672
ENST00000371335	19.7678	16.606	32.3597	18.8277	16.1606	15.2779	14.843	14.9412	10.1589	13.2239	12.4696	11.2941	12.7691	14.9518
ENST00000358056	19.7445	15.6888	17.5729	16.0361	11.2884	11.9105	12.5404	17.9922	16.8712	15.2642	9.65806	11.4689	12.99	9.9032
ENST00000622257	19.7326	21.3335	21.0159	24.5143	22.807	28.9502	20.1253	25.0894	40.7393	43.2969	16.2025	29.2022	24.3656	19.0884
ENST00000373178	19.7305	18.3351	20.9302	19.4872	18.2221	17.0733	20.2648	30.0108	35.2906	37.5164	22.8774	19.0775	19.5602	15.2597
ENST00000449803	19.7296	14.9616	17.8445	16.7616	1.38144	24.746	0.983227	0.826721	0.393852	7.87241	1.22185	18.5671	1.44429	18.2105
ENST00000361611	19.7254	22.548	25.6268	21.4763	40.2907	30.7281	39.9387	41.384	39.8145	46.9704	39.8225	41.3079	32.3871	27.161
ENST00000315732	19.7102	18.0157	21.8829	19.9637	11.4979	15.4415	16.7522	14.478	6.02735	25.8518	17.3533	24.0381	18.5537	13.0136
ENST00000367963	19.7054	14.8191	18.0131	16.3887	15.7344	18.5588	16.0509	16.3433	13.4252	12.2819	9.26202	16.6901	26.3691	32.3184
ENST00000322088	19.6871	12.0918	16.1249	16.9789	20.7483	18.3631	15.9369	19.5537	13.9568	18.0827	20.5989	17.4913	19.4824	13.621
ENST00000398125	19.6849	0.228948	14.5766	0.508762	0.380241	14.1021	0.35302	0.200871	0.227088	0.181716	0.385332	13.8183	14.5797	0.186303
ENST00000230340	19.6792	8.64619	15.5104	18.4972	13.1197	6.71018	10.7557	16.0666	17.3924	21.7167	17.5504	12.5109	10.4135	5.48006
ENST00000264263	19.6633	19.1635	21.8711	25.6477	20.4457	14.9846	16.3613	13.4475	8.99729	14.7885	15.7011	16.695	19.885	12.6697
ENST00000317552	19.6401	7.31873	11.3308	7.92822	8.3979	9.65272	5.73425	4.42199	2.29115	4.10849	9.72056	6.11529	7.52765	5.11118
ENST00000273398	19.6393	16.0424	15.5398	14.3743	15.4612	15.4621	13.9564	12.8765	9.20489	11.4055	16.8842	15.4977	15.3882	13.777
ENST00000305747	19.6291	5.92037	7.73512	6.16829	5.05532	6.93725	6.92512	7.65447	3.63055	3.08489	4.44609	5.82795	7.27646	4.77271
ENST00000394464	19.6288	13.8036	12.7758	10.6188	14.9702	17.9482	2.4686	4.23477	4.80791	8.01996	14.1719	10.8304	11.4521	10.4884
ENST00000400137	19.6263	13.5163	17.325	15.2673	41.5114	12.4034	17.4133	17.8925	30.9119	17.6446	13.6377	59.5745	16.9645	16.5848
ENST00000269243	19.5949	5.91179	8.4083	5.64267	7.16945	7.21011	6.98073	7.93438	3.79815	5.08321	7.31309	6.06698	9.33281	5.46532
ENST00000325974	19.5932	18.5991	19.5308	20.5029	25.9574	21.2237	22.7534	16.7002	15.3936	21.4988	24.8192	20.4202	21.0352	16.2693
ENST00000292431	19.5881	7.89007	10.4343	11.3681	13.6009	11.026	9.26264	10.4981	8.76387	16.3166	18.4375	11.3017	16.6489	7.95747
ENST00000373218	19.5819	6.17797	7.5984	6.43327	5.9659	6.04641	7.02537	10.7252	8.82597	13.9517	11.3086	7.10142	9.45826	4.68677
ENST00000011691	19.5733	26.1626	27.7412	27.9349	22.9179	23.8274	22.5739	34.763	42.4524	32.2667	20.3865	23.7106	22.6018	21.2857
ENST00000239878	19.57	16.0301	17.769	19.0014	19.1496	18.7743	18.7075	22.2198	23.6796	25.2566	22.4945	23.5422	24.2501	21.5833
ENST00000397298	19.5633	18.9294	16.083	26.6855	21.537	19.4031	41.02	22.7682	16.9313	27.0791	16.1465	14.2113	20.2753	12.7389
ENST00000539854	19.5612	36.9855	36.176	40.5636	55.0234	43.1602	52.7553	49.2183	51.4006	54.2757	31.773	39.7222	28.2367	26.6791
ENST00000217446	19.5453	16.0706	18.5194	15.646	16.0865	16.8222	16.8157	13.4557	8.16372	7.41355	7.67122	13.3824	17.2492	12.4352
ENST00000262120	19.5157	6.93532	9.14921	9.1837	7.3788	6.86632	5.99301	7.20915	5.17017	5.42041	6.65497	4.79805	7.66672	5.99549
ENST00000358869	19.5047	12.7111	12.2857	12.4051	12.9064	15.1605	16.2604	12.5606	6.02568	6.88353	10.2651	16.775	14.0029	19.143
ENST00000247191	19.4979	19.4983	40.3721	71.6279	66.0516	53.7428	16.2835	11.5205	11.7779	25.7125	53.8471	29.4417	33.222	23.5241
ENST00000346234	19.4963	17.3132	19.5086	17.392	19.1171	17.9386	17.4693	14.8526	9.03399	9.81962	18.2692	21.5927	19.6025	21.6809
ENST00000372457	19.4961	12.5177	18.0171	18.9543	19.2285	17.7141	10.843	11.8868	15.6007	20.8157	19.1092	17.1805	18.1461	14.1239
ENST00000367602	19.4934	19.3747	18.0514	17.4722	18.2578	19.6971	22.0504	18.9321	15.0434	14.4363	13.934	21.3461	23.8172	22.4981
ENST00000355091	19.4861	18.0812	19.8532	21.7059	24.3822	22.4065	22.754	22.4771	20.8436	25.7268	15.4868	21.6352	20.7576	20.0262
ENST00000373715	19.4822	10.609	13.8581	4.52228	11.9229	9.97418	10.7308	11.9897	8.41079	9.84947	7.23151	7.81992	8.4817	6.9244
ENST00000324366	19.4727	3.88396	5.35539	1.78866	6.11195	7.52101	7.98603	8.93055	7.12272	8.85355	10.0381	4.34319	7.48807	5.38254
ENST00000261921	19.4724	12.0064	14.775	13.2557	16.3585	16.9266	22.4817	18.731	17.9126	17.1994	7.89121	15.7354	19.7498	16.445
ENST00000406934	19.4471	8.90557	24.118	10.3296	9.62275	13.3779	24.2012	20.1271	23.2441	30.6275	15.3337	6.93987	26.8027	6.09855
ENST00000361070	19.4455	7.2568	11.8669	14.6906	13.145	10.381	6.07293	8.1187	9.86452	14.397	20.4654	10.1268	13.9817	8.06556
ENST00000372210	19.4281	9.27068	10.1231	9.42793	9.98339	9.10461	21.1632	26.4585	20.5684	31.2557	16.8367	13.129	14.0154	9.28912
ENST00000374907	19.387	15.7809	16.4424	15.3507	14.005	13.1658	10.4398	10.3905	7.27311	9.74573	13.2311	14.8838	14.2005	14.8904
ENST00000239891	19.3854	27.0101	30.6202	36.7436	40.4246	30.9019	28.2167	27.054	28.5755	39.3384	45.3454	31.7055	31.0361	21.6795
ENST00000513185	19.3691	17.5815	23.302	17.2428	18.5026	13.366	7.64605	18.7123	11.7666	12.7418	22.2358	21.9052	23.552	19.3336
ENST00000540149	19.35	0.092892	1.53753	0.051988	0.117298	0.275855	0.074529	0.002349	0.068928	0	0.055186	0.205172	0.201295	5.4074
ENST00000557644	19.3447	9.20729	12.1045	12.801	12.7638	14.0782	11.1468	7.95862	0.007598	0.02645	0.008094	17.7423	16.2997	14.6772
ENST00000359957	19.3433	41.2546	40.9124	34.8961	38.801	25.97	50.9449	51.4133	57.0233	75.8097	61.894	40.3623	29.9496	25.3151
ENST00000368003	19.3371	21.3907	22.5798	22.915	26.9427	25.2205	32.1718	29.6407	26.1462	37.3747	30.8478	24.4793	25.0044	21.0648
ENST00000287844	19.3197	7.47758	13.6801	13.0537	11.848	8.91851	7.99033	10.3375	9.2462	13.9548	15.107	7.57654	11.3509	4.92623
ENST00000625357	19.3165	30.9335	32.8415	32.1142	49.6961	44.8778	66.827	55.5499	52.5091	54.6158	51.6592	54.0871	38.9613	35.7259
ENST00000326181	19.315	7.95179	10.4214	10.2775	11.6303	10.3045	11.3696	12.8246	9.71483	14.0235	15.3376	12.7638	13.4479	9.48714
ENST00000248378	19.3055	17.6779	16.9475	20.3767	19.0506	18.9638	16.1164	11.3922	13.3697	22.8933	19.0998	17.5122	15.3848	13.2463
ENST00000379589	19.3013	20.0457	16.6019	15.1988	17.4701	18.5117	22.6969	15.1821	6.85435	3.78858	9.10679	19.5301	19.219	14.494
ENST00000571378	19.2704	0	0	0	0	1.21057	0	0	0	0.092616	5.73802	0.057815	3.38869	0
ENST00000220514	19.2678	15.9205	18.8297	26.072	23.6404	22.9201	19.4313	13.0092	12.4421	21.7607	21.8056	19.2316	19.4821	13.7774
ENST00000372994	19.2662	19.8713	25.4122	24.4363	19.5635	21.0805	26.657	27.1774	21.8359	25.305	24.9306	28.6382	24.5272	25.0982
ENST00000356634	19.2551	1.9652	7.51341	6.17875	7.39949	5.62207	4.67399	3.9929	4.83641	3.73796	3.98457	5.07059	7.14604	3.21099
ENST00000576229	19.2496	10.7881	11.9852	13.0929	14.7105	14.6226	17.3871	0.188461	13.3927	0.116098	0.125505	15.7394	16.4947	8.41424
ENST00000395468	19.2428	0	7.50243	0	3.12798	6.21316	0	9.83377	9.36367	0	9.13717	5.43356	6.49195	0
ENST00000263102	19.2377	5.05226	7.06979	6.9955	6.29782	5.58845	4.78062	3.94761	2.00773	4.1174	10.2592	5.73282	7.95613	4.8854
ENST00000287022	19.2277	41.9412	36.8917	44.0128	49.1555	43.4107	55.8368	58.3229	55.5619	54.9659	42.646	47.1331	32.2355	37.6508
ENST00000350796	19.2119	5.84691	9.09258	8.6843	8.77603	9.76833	5.17318	2.99732	2.13401	5.40974	8.68909	8.45821	10.242	7.86174
ENST00000367242	19.2106	18.8568	21.3905	22.3633	24.1145	21.2779	21.8014	21.0423	20.3048	22.8324	19.9154	17.6452	17.9669	15.2982
ENST00000371361	19.1997	17.1439	21.5009	21.0372	19.8209	15.9067	12.9269	10.6837	18.4078	24.1548	24.082	20.1206	18.5459	15.8144
ENST00000353258	19.1857	16.2807	18.8943	20.9113	23.9295	21.0966	21.8243	18.4235	16.6027	22.5944	21.439	20.6091	20.7625	17.1334
ENST00000317897	19.1468	13.5827	13.9384	13.7383	24.3049	19.7492	16.9633	16.9687	24.3496	36.3201	21.317	20.6282	20.1644	18.5814
ENST00000572815	19.1385	9.31968	12.5075	10.4396	8.66688	11.3187	13.4228	13.1706	10.7239	12.3008	11.8474	7.57564	12.0458	7.21148
ENST00000245046	19.1377	15.613	21.2692	17.8113	23.3078	18.1199	24.4754	23.43	24.1264	33.2689	24.7872	18.0913	19.1809	18.4815
ENST00000289382	19.1323	15.8402	20.0379	21.4651	18.4482	17.8061	13.9652	11.4534	10.442	19.324	17.3179	18.6339	18.9004	16.1783
ENST00000257789	19.1178	14.561	9.46571	14.7096	15.6642	6.55702	16.3726	12.0874	7.02251	7.8706	15.0829	17.8795	17.7227	15.7916
ENST00000373044	19.0815	23.7163	24.6245	22.1993	19.5594	15.6424	23.8666	32.5212	31.0263	32.0073	31.1638	23.1661	23.2044	16.1596
ENST00000543234	19.0755	12.207	9.71902	12.1292	12.1936	14.3407	17.4071	13.4532	11.6562	16.0981	21.188	13.1926	18.7005	16.261
ENST00000464650	19.0724	21.376	49.3542	47.6079	48.1437	24.1229	55.8816	45.8447	41.0923	45.5564	49.7305	20.5465	19.969	16.2616
ENST00000348257	19.0723	18.0059	1.24839	30.436	26.0906	19.9377	1.29606	23.352	32.4404	1.45112	26.9119	1.10812	19.4338	17.9597
ENST00000393600	19.0717	5.90869	11.3145	10.2353	7.70739	7.50715	10.2825	10.4567	7.86521	8.91713	13.556	10.4355	15.0401	6.07776
ENST00000374500	19.0655	22.9391	23.9455	28.9428	28.5107	30.756	32.9701	34.9522	26.1299	30.9841	21.0161	29.0904	19.3314	20.5536
ENST00000589913	19.0594	28.202	32.1195	26.4387	27.3554	17.8347	26.2916	29.5207	29.1198	37.0978	27.8181	22.4964	34.3155	20.0955
ENST00000354666	19.0563	13.8323	14.0361	12.3771	9.93593	11.1784	11.9501	10.0605	5.7096	5.2611	8.82723	13.1764	10.2272	9.39837
ENST00000299980	19.0471	5.43151	7.72099	8.61071	8.36295	6.91128	5.28278	4.58922	3.87883	8.40239	10.2195	6.74883	7.45983	4.76947
ENST00000276079	19.0458	15.4482	16.6723	14.1559	22.4571	31.59	23.2598	20.5402	31.1761	40.5423	38.6196	41.5971	26.762	19.4327
ENST00000568459	19.042	2.59337	4.41829	2.39843	6.7222	0.649375	0.159724	0.826365	3.56065	3.74671	10.6728	6.04165	13.1415	4.47546
ENST00000011473	19.0325	9.22417	11.8368	16.7521	9.96957	7.51193	7.53376	8.25596	6.46759	10.2751	14.4917	10.2705	9.69483	6.87565
ENST00000379018	19.0317	35.9759	43.3217	21.9531	24.5144	18.5175	28.5471	30.7313	24.6355	29.1555	40.5826	32.4932	24.4723	25.5447
ENST00000576861	19.0286	33.7217	30.5079	22.7476	28.5672	13.3769	73.3797	31.8053	62.856	26.682	28.7912	18.8928	12.2283	20.4206
ENST00000237858	19.0279	26.9831	25.5751	23.7174	18.4853	18.3597	20.4807	19.519	11.6728	17.3414	25.5223	27.6538	24.7136	28.5357
ENST00000340934	19.017	10.6031	10.9669	10.874	11.0784	12.1852	11.0095	10.2768	8.62427	12.9066	1.42546	9.22608	11.2454	7.21067
ENST00000454520	19.0121	13.1683	31.4922	47.4908	23.3033	24.5639	14.1948	7.12334	12.3935	24.1848	27.9674	13.7625	25.582	12.0544
ENST00000258962	19.0111	18.0572	23.3337	25.9883	29.0022	19.4511	18.428	11.9406	8.7776	10.3668	17.9053	12.6966	18.836	7.11355
ENST00000371933	18.9993	10.0544	14.2428	14.9565	14.6951	12.1984	10.0224	10.9434	8.3885	13.7959	16.8465	13.6611	17.6805	11.6514
ENST00000375980	18.9943	13.2512	17.7511	18.1089	22.2756	17.5823	16.0421	16.93	15.347	23.9441	20.5478	22.1133	21.1407	19.4453
ENST00000355841	18.9908	2.96748	1.33517	4.76001	2.87638	15.677	10.8961	6.79559	3.04144	10.0082	2.91742	6.82502	13.9167	10.0746
ENST00000651154	18.9898	0.561287	0.237175	0.158871	10.2019	0.0928	0.18067	21.6079	0.070783	13.0936	15.2371	0.169206	0.102532	0.130175
ENST00000334274	18.9762	7.78677	10.1007	1.14635	9.18326	11.0319	8.82128	7.57629	6.35982	10.2982	8.19653	8.32281	9.09683	7.51611
ENST00000361055	18.9562	11.7103	12.7424	13.3527	20.1565	18.9863	14.33	14.8338	11.7001	16.3291	25.1259	21.0092	18.7476	18.8536
ENST00000373840	18.9509	9.73879	10.6537	11.3886	9.05493	9.13458	7.58823	6.96487	6.28879	13.5434	14.1875	9.08077	10.8851	7.74349
ENST00000299964	18.9412	40.046	43.3909	38.0456	34.0168	39.788	21.4329	20.1988	19.7836	20.1792	15.5466	28.8179	26.6391	27.3181
ENST00000317610	18.9334	26.6669	29.0912	32.0668	42.6082	33.3591	33.0717	27.3007	18.669	29.6756	26.6707	35.8976	32.4783	28.7561
ENST00000223029	18.9201	22.3435	35.1658	41.4984	34.6716	32.2219	21.1697	22.1723	10.6192	35.1264	35.9617	22.9695	24.2102	17.7866
ENST00000301464	18.9093	17.6952	17.641	21.9961	25.4416	34.3489	25.1757	25.6893	22.3592	26.4389	27.1738	46.8414	46.4671	43.1265
ENST00000358625	18.9005	9.8631	15.3975	14.1029	16.4748	12.5814	11.1053	13.2809	14.4289	18.5779	14.4148	12.9833	16.2803	9.26672
ENST00000344357	18.8988	23.4668	21.8157	22.3687	25.004	21.6427	28.7979	22.488	8.04047	9.35267	15.9102	22.5893	20.7432	18.5671
ENST00000569669	18.8823	20.3149	27.949	27.9809	32.5844	18.9013	26.9637	27.6419	26.7244	31.9044	23.6075	24.3626	22.1567	12.9769
ENST00000412830	18.8761	11.4859	17.6498	17.877	19.8893	12.8247	10.4754	10.5819	7.1516	11.3443	17.4996	10.5014	12.6733	8.82859
ENST00000373548	18.8525	3.02612	8.14759	9.3007	3.16678	9.21574	1.81457	9.83625	2.10515	2.56297	4.54707	6.73947	6.88028	5.75843
ENST00000279146	18.8501	21.179	21.5269	21.7168	23.5575	28.1504	29.4128	22.6549	18.9217	30.8559	29.3901	26.3374	24.1225	27.4154
ENST00000216484	18.8498	10.3695	13.3014	12.2808	12.9386	9.61991	7.24845	5.13142	4.98033	9.60982	12.731	10.416	11.5544	8.11884
ENST00000263697	18.842	30.6441	28.2886	29.7242	32.3987	29.7756	36.0901	32.7536	28.1186	32.5538	32.6133	30.5938	28.1314	25.649
ENST00000352331	18.8348	16.8879	21.3283	31.1223	17.0824	10.9513	6.1586	6.3146	10.3804	17.6985	16.87	8.60911	14.9455	5.71783
ENST00000417626	18.8261	25.7359	31.974	32.9729	28.292	21.3923	30.4498	27.9609	26.264	35.4366	24.7276	19.287	23.6078	15.2384
ENST00000394863	18.8196	7.40107	7.24379	6.54954	5.71907	9.68526	12.404	13.7872	6.31723	4.39149	11.627	8.46609	9.9239	8.7794
ENST00000366812	18.8191	4.79542	9.21314	9.07041	6.41456	6.9438	3.67471	4.44386	4.22248	8.67903	15.0795	6.23249	10.0187	5.50844
ENST00000261597	18.8123	19.4226	34.4898	55.2533	33.3026	37.1424	12.4334	7.87962	14.7685	34.3361	45.3757	25.9723	29.5133	17.9838
ENST00000397615	18.8097	16.1612	19.656	20.7827	25.1408	21.0196	23.7947	21.1885	22.1765	18.6161	19.2985	15.9641	24.3193	19.2785
ENST00000258947	18.805	13.4542	15.4473	18.0307	15.7947	17.6086	16.0182	5.47545	3.9783	6.01379	22.2828	18.5512	18.0091	16.017
ENST00000263795	18.7922	11.4375	7.53152	6.22688	14.5837	11.1891	12.1654	10.3974	15.9033	15.874	9.33662	10.5729	11.2555	10.3372
ENST00000505164	18.7787	11.7296	4.62386	9.25066	12.6124	6.51593	9.90107	8.16588	6.42413	18.4025	9.14228	14.3753	14.5743	4.18484
ENST00000309784	18.7776	14.0949	33.0346	38.9146	17.0007	26.0895	9.83875	15.7392	20.2851	24.8031	22.4379	15.3699	20.5211	15.6288
ENST00000361381	18.7669	3.77042	4.4414	4.26438	2.93025	4.2876	4.56073	6.26573	2.60908	3.87604	5.9296	3.27004	3.30176	3.53485
ENST00000261797	18.7522	4.18932	5.97464	2.30136	5.84259	2.0972	3.53127	3.34506	1.65236	3.20642	2.13773	4.72487	8.1328	3.17462
ENST00000587091	18.7515	6.54033	9.28002	8.13863	9.05239	8.10673	8.70438	9.14353	5.15451	5.91656	5.73706	6.23268	11.796	8.00643
ENST00000262133	18.7508	10.693	11.6708	12.6809	12.699	15.1762	11.3638	9.71844	5.15636	6.20778	13.3714	14.2181	15.1282	15.6754
ENST00000577261	18.7445	4.17242	10.3588	0	9.97865	2.9522	9.81914	7.4574	0	9.50655	11.8975	0	0	5.89721
ENST00000250113	18.7298	11.987	15.3203	13.6738	20.2117	14.626	16.598	16.918	21.5011	29.9307	27.2851	22.9183	19.3786	13.3725
ENST00000341750	18.7209	19.8882	12.8182	10.4363	13.3511	16.5582	39.7961	40.1669	39.8675	47.4205	39.2546	22.3144	16.8121	13.9352
ENST00000571732	18.7164	25.1064	16.036	15.3682	8.29974	12.553	17.6057	12.3988	12.7054	12.4692	16.786	11.0531	24.3671	8.39092
ENST00000307102	18.7131	7.75178	11.8753	11.5065	11.6448	10.4724	7.81142	7.13122	5.58466	12.1253	12.9206	13.3833	16.5506	12.6084
ENST00000203630	18.7117	16.042	8.05339	19.8046	22.1815	12.0786	14.7116	5.43817	6.0445	18.8474	19.6767	15.9302	8.70996	10.7577
ENST00000315717	18.7037	57.4861	18.9892	21.5548	29.6061	17.4606	21.2487	23.6635	37.3282	11.868	20.3734	23.2858	28.9415	26.2621
ENST00000394417	18.6572	2.74881	4.42508	3.0879	6.45832	3.02979	0.744721	1.45899	2.4762	0.840217	2.7729	1.13615	4.42012	0.830248
ENST00000347136	18.6504	7.4465	8.73279	9.02087	8.36415	8.84229	7.95972	8.83489	3.77309	7.09749	10.5318	9.24301	10.9348	8.5646
ENST00000494062	18.6497	10.95	8.48339	11.4907	11.703	13.4619	11.8082	0.4859	6.96003	10.3634	18.3337	15.4022	16.206	12.8217
ENST00000540288	18.6442	12.9536	16.0957	14.2289	15.7356	13.2	16.5107	15.6198	11.1599	17.3067	17.377	16.6449	16.3757	11.4644
ENST00000351018	18.6375	8.50205	11.869	12.3665	9.00506	10.4888	8.57473	12.8723	10.9227	22.0221	16.0233	11.6711	10.8006	7.62207
ENST00000317534	18.6329	25.9298	25.6478	24.7908	49.5911	45.4407	61.4268	58.9085	58.6592	62.3761	52.63	51.4964	32.5563	38.0389
ENST00000295924	18.6251	15.8329	21.8865	21.0053	5.80045	16.3121	3.02531	8.33946	8.89255	9.75361	7.17219	15.3627	18.2288	14.5663
ENST00000263674	18.6219	5.45095	6.43748	6.7894	5.26469	7.84576	7.21941	6.19887	4.16925	9.37627	9.05187	7.17904	11.3073	6.32128
ENST00000367419	18.6217	18.797	18.6783	19.6259	21.6592	19.1099	19.4647	18.3378	15.4331	17.4977	17.8685	23.7289	20.7971	22.4629
ENST00000216639	18.6104	15.8771	17.1757	16.6396	22.1333	20.9132	20.1761	16.8497	13.1469	14.9	19.8851	24.1577	21.6969	19.3259
ENST00000316694	18.6077	0.674497	12.7564	11.2185	0.778936	11.162	16.0432	0.628819	0.396962	10.5614	0.454064	10.8759	12.0567	0.749307
ENST00000234454	18.5952	13.2538	14.3135	14.8135	16.9698	15.7437	16.8505	17.3166	18.5351	23.8815	21.2436	14.9505	16.2841	9.78506
ENST00000416016	18.5907	24.0685	17.2448	11.5355	11.2557	9.91715	27.8196	25.4152	33.013	72.3304	19.8652	18.0339	10.0289	6.23757
ENST00000305544	18.5645	11.0854	13.536	12.8949	15.0067	16.9135	14.3232	15.5341	11.1092	15.6859	13.1968	19.0796	18.932	19.2101
ENST00000264963	18.544	3.92588	19.6655	4.64275	5.63631	22.5149	4.11736	3.23957	3.11535	15.776	3.78226	3.70787	4.2919	3.09875
ENST00000527376	18.5305	4.42678	6.082	5.56844	5.77102	5.69143	5.60044	6.90332	2.2343	4.18552	9.06184	6.17243	5.96865	4.10186
ENST00000342192	18.5272	19.3477	21.0107	22.8938	26.0828	20.2718	23.1739	20.8971	16.7166	21.4496	21.4921	23.4099	20.6529	16.8335
ENST00000336032	18.5174	5.68747	4.34207	6.27672	10.0871	10.8602	11.2883	11.608	10.2992	19.6164	22.3344	12.1177	12.1897	12.7165
ENST00000318560	18.5143	5.48399	8.16641	6.15463	6.81417	6.64424	3.9312	4.88363	5.28061	9.08456	10.2739	7.43429	11.7938	5.42678
ENST00000366955	18.5137	6.18219	15.7483	20.2252	14.8191	16.2048	4.94322	4.87052	4.19485	11.5261	24.5517	8.99967	15.9243	8.63589
ENST00000296503	18.5108	15.0802	19.3511	20.5701	17.8353	21.4396	17.0483	15.0727	17.8089	27.4212	20.0656	13.0009	14.7374	13.9549
ENST00000314358	18.5108	6.5068	8.1033	9.42251	12.4861	9.22996	7.4899	6.00191	3.60211	8.74346	12.2492	6.65364	11.4053	6.60194
ENST00000289373	18.4966	28.3832	24.2036	25.3742	24.2866	29.2536	34.886	34.7797	35.4942	40.8686	20.3339	15.2045	12.6445	16.7872
ENST00000276585	18.4887	22.1387	22.5941	30.1406	30.3862	22.8891	23.9269	16.8949	9.19466	8.76744	14.4003	20.3733	19.7256	16.2306
ENST00000405489	18.465	17.2814	18.9316	18.8462	17.9469	17.0677	22.5699	21.8411	19.3697	17.5675	13.5128	16.7132	17.4853	13.5116
ENST00000589115	18.4545	39.2265	35.7446	33.8796	47.4332	42.1092	51.4017	51.2955	30.0986	34.5639	44.5699	18.1865	22.0628	31.7077
ENST00000332707	18.4505	13.1205	16.4888	18.7822	18.1988	19.3357	11.23	8.39317	9.22306	16.8215	15.7572	16.4516	16.5062	10.9184
ENST00000451605	18.4494	25.7995	26.5266	71.0711	25.72	27.5596	27.615	26.7338	25.5402	28.3897	25.8068	27.0934	27.8193	27.441
ENST00000341423	18.4486	15.8758	14.9616	19.6757	24.3934	19.6882	22.9926	24.9284	19.6854	21.6215	18.029	16.5647	14.4918	12.8286
ENST00000228740	18.4408	29.7307	36.7457	31.4626	36.3294	18.3993	39.2187	31.3253	28.3209	4.04111	4.03645	33.8483	14.2918	17.7923
ENST00000639145	18.4343	0	0	0	0	0	0	0	0	4.98651	0	6.64075	13.5185	9.02002
ENST00000373750	18.4167	13.1373	12.0519	10.1465	13.9207	12.4528	19.4126	11.69	14.6151	25.5522	13.9821	13.5549	20.5128	14.3209
ENST00000421367	18.4044	7.30854	9.91376	9.50774	9.24792	8.43745	10.8044	10.7426	8.68835	10.1262	9.04269	9.63692	11.6253	8.46247
ENST00000327134	18.4042	4.72422	7.35523	7.52346	6.42685	5.63278	5.03839	6.05855	3.42287	6.82691	12.0084	6.07179	8.6277	4.80048
ENST00000394886	18.4015	7.16455	11.4135	12.7319	12.8897	10.1974	8.03895	8.89276	10.5789	18.4134	16.5359	10.1528	12.4314	7.75602
ENST00000329559	18.3998	71.1257	30.0032	28.5024	34.2008	46.1122	64.9336	52.5888	41.2743	57.3586	24.6338	60.8868	28.0585	31.0866
ENST00000346365	18.3969	26.1694	20.081	21.2924	21.9304	21.1256	29.4739	22.699	15.6962	20.8783	10.2748	22.8091	20.0983	20.4069
ENST00000252115	18.3527	9.61122	3.36282	1.78694	11.8128	4.16154	9.09987	3.03368	11.4363	25.7501	1.9361	12.6788	3.10568	3.2802
ENST00000372813	18.3472	15.9965	24.1597	22.5097	20.5733	14.627	15.2589	17.6337	13.5783	21.6895	31.6141	20.4074	22.1828	15.3468
ENST00000400324	18.329	9.68539	9.35964	10.8227	9.55387	11.2837	10.4158	8.26889	3.73645	3.65865	8.00798	10.8805	13.2408	8.41143
ENST00000316623	18.3111	3.34235	8.79073	7.38286	6.15477	6.90955	4.37502	6.62412	1.99616	2.95378	5.87318	8.5224	14.0266	7.07417
ENST00000267115	18.3084	35.0245	28.425	32.4744	27.5233	24.7111	24.1993	44.6906	25.6697	57.0623	23.774	26.7509	28.867	31.4915
ENST00000413761	18.2982	8.94945	11.2094	11.5321	11.6961	13.2345	6.93227	7.97241	12.6479	16.7047	17.1066	11.9141	13.1118	8.91309
ENST00000375631	18.2982	19.9445	21.3582	25.3818	28.5921	19.9066	25.6019	31.0629	35.4325	44.7056	49.6281	27.908	27.2927	24.9212
ENST00000543117	18.2831	5.39037	12.9199	10.0574	10.2182	1.01195	0.65176	0.917441	2.77342	0	12.5145	0	10.2733	4.78099
ENST00000371696	18.2829	12.5252	15.1422	15.8652	13.0047	12.034	14.9089	15.3626	10.8333	15.7513	18.509	14.1975	17.15	14.5567
ENST00000372458	18.2737	15.7556	21.4952	18.8011	20.2663	14.6757	21.6312	16.6064	17.4341	25.3059	23.4693	21.3797	15.6038	15.0297
ENST00000276590	18.2732	19.0022	16.271	17.9436	17.4169	16.2027	18.7603	13.2313	8.09218	10.6569	16.7831	21.8545	20.3702	16.213
ENST00000400181	18.2643	5.93308	15.4351	19.6476	30.714	22.7534	20.1914	18.6636	12.8447	21.7108	31.3919	22.7693	19.9644	18.7383
ENST00000540200	18.262	5.37571	9.25588	7.98473	13.7813	11.1196	11.9274	14.847	12.8867	16.7374	17.9208	12.4122	16.2358	7.45023
ENST00000611854	18.2583	8.18781	11.0213	9.15371	11.1042	13.898	8.72765	11.8453	5.6591	5.87119	38.494	8.36984	6.78274	29.2883
ENST00000316594	18.2571	6.5926	7.41935	7.76404	1.12939	11.8787	1.46544	10.1323	8.65572	13.0579	13.3119	4.49889	9.60256	6.96693
ENST00000337526	18.2498	16.4125	18.2934	18.6558	17.7519	13.2983	12.8707	12.1893	9.69966	12.4367	13.8333	13.2381	16.9661	10.4013
ENST00000319331	18.2437	5.61859	12.2795	14.6522	12.5674	12.3393	5.80263	6.83147	5.26759	6.42611	11.1136	11.5444	15.0328	7.41885
ENST00000376257	18.2414	15.8157	8.27229	6.98298	15.8925	9.59341	14.1293	11.4704	14.3676	44.7353	6.8081	20.3411	29.0706	10.0156
ENST00000309195	18.2301	20.8722	17.8208	18.5685	21.8349	20.8395	27.9343	23.5109	20.1948	23.6969	25.0008	33.3577	29.0522	27.0263
ENST00000411646	18.2281	25.1829	23.8074	24.4313	24.9528	24.7057	33.7078	34.9598	33.8808	32.8294	23.3738	28.6606	21.1779	24.9779
ENST00000592148	18.2251	8.58565	9.70155	11.8164	12.5112	13.572	15.4161	13.5954	15.5551	5.61592	6.39574	9.19709	9.31568	0.94546
ENST00000375885	18.2225	10.3031	12.4445	3.85336	18.1724	4.99777	4.96578	4.93378	11.5802	12.6165	12.3333	12.61	12.1087	9.21163
ENST00000246747	18.2211	13.0283	16.7022	17.3043	20.0394	22.9382	24.2264	20.3815	13.7128	18.491	16.8796	22.7635	21.9058	19.6844
ENST00000342206	18.2158	14.287	19.5011	19.2628	18.164	18.1979	14.6428	16.8439	15.9667	25.9766	19.2761	13.8112	15.9523	17.0944
ENST00000370693	18.1988	14.2691	18.4423	20.6361	18.5112	17.6233	12.402	11.9495	15.6798	21.1088	11.6919	15.6872	15.3553	10.5516
ENST00000302746	18.1857	11.02	16.5263	16.8131	20.1076	15.9718	25.6396	18.5486	18.7989	21.9602	16.4673	14.3699	13.1543	14.0183
ENST00000300030	18.1701	22.6264	16.45	26.1207	24.0021	18.6846	18.697	19.4561	18.3816	20.2973	20.4469	20.5502	17.6808	16.36
ENST00000448364	18.1694	13.9886	5.63403	26.5456	10.9549	11.4426	24.8392	22.1589	5.21621	7.75326	11.7878	10.7474	4.83307	20.1987
ENST00000285667	18.1673	15.2767	17.1834	22.2759	18.8778	17.0521	16.0838	17.561	17.4804	17.8118	15.8095	18.2236	19.3569	17.6074
ENST00000295901	18.1406	4.49163	11.3624	8.0969	6.092	6.9033	6.4608	3.76866	2.76605	7.44582	11.6731	3.77254	11.4516	2.73557
ENST00000246194	18.1039	14.0586	20.605	14.1019	9.77104	24.1172	21.6547	22.4748	15.3624	22.1244	22.4206	23.6175	19.2906	13.9815
ENST00000311083	18.0912	28.3347	27.1469	26.4379	24.1562	37.5591	35.5188	32.4553	35.1581	29.1605	36.5002	34.7531	12.6602	30.6812
ENST00000426013	18.09	16.0766	14.5878	24.6275	8.8491	4.02228	8.84364	9.297	11.9569	9.51441	25.455	7.32009	8.31265	7.18275
ENST00000413366	18.0848	4.69564	7.80051	6.74366	6.81059	7.87634	6.24431	6.47875	2.23369	1.99608	2.89476	5.17076	7.14381	5.03494
ENST00000542645	18.0829	1.4961	18.1614	14.4339	0.618162	0.512461	0.503214	0.43357	8.85763	0.38783	10.9195	14.0324	12.5736	15.4788
ENST00000376033	18.0781	3.59712	4.61805	4.67446	5.54271	5.22908	11.7045	4.8572	3.03385	9.29555	10.7192	5.80132	12.3879	3.90709
ENST00000324607	18.0762	11.8074	12.6791	13.8452	15.643	16.4441	10.6279	6.12094	5.17857	8.11982	10.2892	10.2846	11.305	9.74067
ENST00000287936	18.072	14.5029	25.1408	28.2585	13.9214	14.1067	5.97277	9.8734	10.4919	15.0771	17.133	10.2231	10.6661	9.48927
ENST00000519974	18.0686	3.51322	9.41845	8.91467	20.9397	0	0.022091	32.7188	0	21.0456	6.20173	7.40105	29.1611	0
ENST00000577222	18.068	42.8822	11.9849	46.9939	63.9515	58.6978	84.0312	74.1104	65.618	43.8776	53.9059	31.8859	42.8413	7.99163
ENST00000611507	18.0669	3.94936	4.53979	4.579	4.49608	3.79374	0.700342	1.19419	3.70009	3.36605	18.1845	4.78927	4.597	4.28295
ENST00000438362	18.0643	9.20993	0.494641	21.9256	0.369966	13.9775	11.2527	10.7847	0.254518	1.95881	7.51452	7.63248	13.7711	0.195537
ENST00000327443	18.054	6.02123	7.64144	6.4065	6.80512	8.42524	5.29788	5.02035	6.34808	12.1788	9.37387	6.82803	8.59402	5.65331
ENST00000355527	18.0518	9.33091	12.8282	9.15069	10.2274	6.79753	9.16344	7.42915	7.4133	7.93731	9.62504	4.86683	5.16668	5.6555
ENST00000371655	18.0343	5.57395	7.55363	6.60357	6.16842	4.7567	6.56119	7.87875	4.10372	5.78721	8.04102	5.9406	6.28737	4.30844
ENST00000290330	18.033	22.4481	23.3313	17.3755	23.2294	23.3284	26.9275	28.6861	15.6508	24.3508	19.6549	22.3057	19.9122	15.2518
ENST00000381679	18.0321	2.90433	5.1095	4.97218	3.57795	3.43083	0.787218	1.59318	1.41218	3.6175	4.29001	4.04688	8.25079	2.58134
ENST00000269740	18.0287	19.0814	21.2039	23.2709	26.1905	22.4148	26.6116	27.0034	26.654	34.8576	28.8787	22.7988	24.3074	15.7286
ENST00000503506	18.0228	5.91005	15.1951	10.0551	3.41384	13.9902	4.79185	6.92212	8.78354	4.26207	8.17787	7.26138	9.972	3.11152
ENST00000397062	17.9697	9.52955	14.4933	11.8119	10.7533	10.4092	5.66381	9.1816	6.78553	14.2698	11.4889	8.9115	11.8806	10.1308
ENST00000429985	17.964	30.7883	26.943	27.3063	35.9807	35.8968	44.9193	44.0272	39.2612	36.248	35.3546	31.462	26.8922	29.7635
ENST00000307720	17.9628	14.1247	14.152	17.2601	24.4167	19.171	17.7407	13.3311	12.8856	20.4293	20.266	18.5064	16.6472	12.3
ENST00000397421	17.9611	22.0964	25.4792	27.5153	23.0011	25.6831	30.6869	33.4943	25.3226	27.4334	23.2573	30.0454	27.4546	33.1695
ENST00000550238	17.9558	0.002133	0	1.5048	0	0	0	0	2.89186	0.686842	0.00373	0.002403	0.094729	0
ENST00000239223	17.9448	21.969	12.4258	9.53447	8.02453	12.0269	21.9492	35.8659	18.779	18.6292	20.6446	26.6343	16.0677	26.6266
ENST00000586659	17.9351	4.82113	5.03878	4.31255	8.06163	9.06948	9.62317	9.37747	7.18038	13.0342	9.15335	6.71476	10.9683	5.97104
ENST00000236067	17.9348	21.797	24.9865	21.6419	37.0558	42.3387	26.9726	67.5676	72.0695	79.2795	26.9703	18.8547	50.6052	17.1595
ENST00000335783	17.93	15.32	13.2498	14.4364	16.2941	14.6582	11.2654	19.2543	25.563	22.9153	19.945	21.6126	19.5161	24.8663
ENST00000577407	17.9234	34.5647	33.0346	40.7427	37.3055	27.6796	31.3175	26.1884	30.7219	38.3712	38.9766	28.6716	24.6503	28.5938
ENST00000409614	17.9215	17.9607	19.0478	235.155	86.2764	200.167	13.9579	24.3791	12.8104	13.6383	10.2712	8.99485	11.4044	19.2674
ENST00000343818	17.9167	10.9862	16.3843	16.1553	12.6456	13.2345	19.377	18.2547	12.6892	23.0822	16.6104	17.8296	21.2346	14.1421
ENST00000324684	17.9161	9.08822	12.04	14.1565	9.9239	10.4589	10.159	8.74597	6.12879	12.0251	15.1057	9.07651	10.6982	8.14684
ENST00000339020	17.9106	9.47105	9.26239	24.7082	19.3276	16.3598	22.5999	29.0012	31.3674	30.6104	20.5766	17.6077	21.5678	14.3076
ENST00000558815	17.8935	20.074	22.533	25.4552	8.02943	30.6718	48.4015	31.7612	19.4899	25.0619	23.0783	34.0077	18.4343	17.3042
ENST00000529168	17.8797	4.95666	7.30739	7.47072	12.7489	6.74053	8.56875	6.39436	5.47396	12.686	13.8871	16.1958	22.5256	12.2649
ENST00000646804	17.8777	7.32143	16.3724	10.6903	5.84893	1.83304	4.64751	0	5.30509	0	6.81741	15.2496	2.67154	3.24434
ENST00000398514	17.8696	0.786912	8.00493	1.61176	1.0406	1.13043	1.0967	1.51195	1.76344	5.05683	9.14898	0.940871	10.7763	6.75541
ENST00000370035	17.8613	11.307	17.66	20.0543	16.8124	18.1052	9.15993	4.50321	3.56071	7.25952	10.1034	11.0018	11.3536	10.4975
ENST00000393623	17.8589	3.90432	5.13117	7.0619	3.89356	5.21574	1.43529	3.46968	7.54955	7.81275	8.23302	5.03236	6.49209	2.84623
ENST00000321464	17.8373	0.015194	0.016309	0.018246	7.35858	0.019092	0.008535	0.008469	0.013776	8.53812	0.007115	6.56036	0.020106	6.1678
ENST00000170447	17.8316	12.1321	17.0565	17.1389	17.5322	15.9894	12.7458	11.6693	17.4163	24.4672	21.411	15.3225	16.7443	14.2068
ENST00000530022	17.8289	33.8255	35.9461	41.9866	33.2661	33.6051	41.1922	44.4738	35.5039	46.8135	43.2134	51.9625	39.1122	45.1428
ENST00000381151	17.8276	7.67673	7.78521	8.00064	7.94672	8.59144	6.46522	8.72971	9.74241	19.4206	12.013	9.59675	7.67594	9.8062
ENST00000219204	17.8211	17.1794	18.3883	18.763	16.3501	15.2485	19.083	18.1666	13.1404	16.2706	18.1262	15.8491	22.5921	13.7861
ENST00000550924	17.8129	0	1.37563	0.019815	0	0.01578	0	0	7.45866	8.22697	11.4769	11.2052	11.4902	9.86811
ENST00000399765	17.8129	19.4116	11.0948	14.4597	21.1042	7.17282	9.23711	8.2626	7.65174	15.4037	22.4054	27.7193	23.3338	9.97689
ENST00000369905	17.7786	33.5785	17.9085	39.8451	45.7426	18.5019	19.1797	16.7994	13.4771	17.348	40.2566	38.3605	38.3364	29.7188
ENST00000373714	17.7739	13.4995	14.2246	18.9621	20.4435	18.8519	15.2373	12.8879	13.696	20.8069	22.4827	20.0668	22.5161	15.9592
ENST00000397752	17.773	9.80679	15.7346	13.6883	11.3026	12.2974	7.07594	5.07023	5.29899	5.31477	12.6214	14.2479	11.8337	9.85958
ENST00000264279	17.7718	14.3667	19.0237	20.5149	25.8868	17.2313	14.7079	15.6993	17.5531	23.2528	21.0021	17.1069	16.4904	8.94026
ENST00000304332	17.7708	5.3604	7.32591	7.39793	7.55661	5.76636	8.41992	7.09143	5.23973	7.78406	9.21919	7.31723	9.31782	4.04246
ENST00000592623	17.751	21.6105	26.5063	31.3039	19.9237	18.4721	26.9882	27.2174	25.6296	26.8736	20.8739	21.7265	20.9099	15.3976
ENST00000309328	17.7433	26.4515	33.2521	33.1743	36.6906	24.5276	38.6552	42.3773	36.2755	42.9944	49.7687	29.4925	28.8089	24.8922
ENST00000538576	17.7422	12.1638	1.00189	1.45602	14.969	12.5111	11.5242	3.84276	17.4615	11.057	18.5528	12.9247	14.4343	3.87969
ENST00000286648	17.7286	13.8462	12.9723	11.9812	10.9505	10.799	11.5761	9.4648	12.4529	16.3883	12.1984	11.5187	13.2207	11.7847
ENST00000422605	17.7219	17.5749	2.59393	3.04734	14.8348	23.0045	18.5556	30.7639	15.9011	1.97018	1.91351	13.3304	14.9258	1.43726
ENST00000339093	17.7014	18.6919	20.2876	19.7992	29.118	22.1927	23.8441	19.7097	23.356	31.8667	38.4919	21.9209	17.6886	12.8568
ENST00000527197	17.701	6.66896	39.7811	35.5095	47.108	28.4113	9.24297	25.2523	33.5397	51.5775	38.8422	29.062	32.5325	13.5959
ENST00000367188	17.6897	9.01757	10.5133	11.6926	10.7727	11.1579	5.10314	15.1028	14.2573	18.3605	17.4411	11.8866	13.2902	7.56608
ENST00000577565	17.6807	22.1479	0	20.093	0	0	0	0	0	0	0	39.1814	27.7719	29.3772
ENST00000545127	17.672	30.1408	11.7175	39.9273	6.9734	32.2653	6.53212	6.69316	8.01492	7.60459	6.96787	8.51742	35.0595	1.50556
ENST00000446294	17.657	14.6943	13.4004	10.5634	11.2883	17.5597	9.981	6.96813	4.2217	4.74184	8.26287	10.3988	15.7513	15.1226
ENST00000370268	17.6553	6.65856	8.64463	7.31952	7.41836	10.4455	11.355	12.8237	4.84881	7.12576	7.53458	10.7604	10.619	11.9077
[truncated: 61,371 more rows]

## Sheet: lncRNA.transcripts.FPKM
transcriptID	C_0	C_3	C_6	C_9	C_12	C_24	UV_3	UV_6	UV_9	UV_12	UV_24	UV_48	UV_72	UV_96
ENST00000618786	167616	387324	336130	366087	362592	375592	405275	389408	548772	332881	382094	425267	344253	470320
ENST00000490232	115102	241248	204737	203839	160738	190871	220875	202694	271096	163273	172361	168113	189197	260823
ENST00000610674	7051.49	21687.2	16898.2	12920.4	13175.1	14259.8	18215.4	18625.4	20996	15233.4	12889.8	14037.5	14609	26415.7
TCONS_00000307	3504.4	156.456	96.0355	77.7495	34.2097	0	0	2.85493	56.1093	181.956	6.1182	98.4629	734.119	117.426
TCONS_00000312	2171.17	184.545	272.198	9.55008	7.73783	4.32363	12.9898	295.606	4.26057	84.2221	103.709	129.525	452.557	28.3189
ENST00000581458	1811.48	4235.43	4116.07	2470.65	3127.47	3383.58	5726.59	3780.12	3719.62	3054.79	3307.08	3761.47	3134.6	3058.36
ENST00000541782	1752.86	4513.8	3755.12	4726.62	4864.85	5595.65	4228.79	3530.61	5381.62	3918.92	5382.06	6254.15	5014.3	8075.16
TCONS_00000843	1699.56	1438.92	1450.69	1077.1	1768.22	1515.26	0	1286.51	1871.83	1157.5	793.4	1285.19	1382.49	0
ENST00000584058	1366.15	2948.43	2555.84	2142.08	3905.46	3675.47	5287.24	4016.98	3680.71	1211.6	3555.95	4718.58	2123.97	2093.87
TCONS_00000316	1329.65	843.881	862.378	609.137	928.336	832.605	927.883	967.809	941.973	630.891	725.858	719.617	873.521	727.605
TCONS_00000831	735.526	8.14971	0.143927	0	0	0	0.003537	0.197594	0.210113	0	0	0.181404	262.179	0.110411
TCONS_00000827	481.602	70.8604	0	0	45.128	8.23711	105.295	393.173	31.0458	0	442.087	316.673	440.602	122.737
TCONS_00000818	462.662	0	4.47703	6.34121	12.5345	7.07799	20.6783	6.59471	0.964073	12.7168	2.11506	32.5721	98.1863	0.166815
TCONS_00000847	413.048	0	136.646	110.885	125.005	137.587	63.9219	163.357	0	74.5162	0	104.169	337.713	109.435
ENST00000363618	354.279	914.575	796.26	659.094	575.691	693.745	836.388	660.051	562.321	563.753	528.704	853.684	567.581	630.685
TCONS_00188832	315.412	74.5601	4.22428	152.46	130.471	134.453	132.326	147.089	99.114	0.189075	47.8956	4.26822	150.5	119.292
TCONS_00000315	272.966	32.0425	55.5309	34.9521	10.1136	15.0659	40.6898	127.976	8.63383	63.5126	102.832	61.5991	88.0169	37.0176
TCONS_00000303	247.347	77.7713	79.0452	70.6752	54.5735	61.9804	174.663	221.386	161.512	180.065	190.033	88.3694	190.84	73.6206
TCONS_00000811	184.186	58.5948	87.7508	4.7571	0	0	0	49.034	0	0	28.434	0	14.8021	17.4925
ENST00000602946	166.135	174.519	182.595	142.39	217.141	207.933	254.497	243.881	159.406	130.531	142.771	162.36	166.33	131.426
TCONS_00000332	164.467	13.6817	25.0195	17.6213	3.89162	7.92424	17.3297	50.0857	3.49069	18.5333	49.7659	23.3667	35.2524	15.3326
TCONS_00000841	150.078	444.934	271.268	283.419	79.0768	157.376	2088.99	279.41	74.2985	293.8	175.513	294.605	226.545	1969.62
TCONS_00000848	147.422	97.6307	37.7632	48.8397	49.2747	76.5329	33.9896	40.1191	27.2856	40.1124	76.7364	53.616	122.875	86.9426
TCONS_00000858	137.412	9.1261	0.007987	7.99351	0.001399	0.007361	0.018146	50.9632	0.018832	0.007884	119.696	43.4146	131.517	17.539
TCONS_00000331	129.55	17.1871	20.9704	9.78492	13.8838	16.886	8.09708	26.0344	6.5924	10.8218	56.1112	31.0547	106.246	17.9821
TCONS_00000800	127.57	68.3338	39.655	30.4491	66.7337	44.4168	336.814	48.0846	53.9978	41.9422	32.901	70.9721	40.3339	270.343
TCONS_00000812	122.56	49.0307	0	0.000159	63.0243	0	0	0.000322	35.1868	33.6482	24.0528	0	0	20.1668
TCONS_00000826	102.77	11.757	101.964	42.0482	3.81121	39.1376	15.8973	54.8534	2.95786	103.323	44.2294	31.1474	35.9714	16.1366
TCONS_00116277	60.9729	48.6621	43.5153	39.8613	36.4683	35.0304	45.5643	44.775	30.6855	42.484	29.8013	22.7823	32.8553	16.6138
ENST00000565493	60.1456	11.3313	16.1994	15.8931	24.0766	20.3536	16.7519	24.6459	19.5502	34.9819	28.4109	14.8543	21.1525	4.01217
TCONS_00224610	58.2749	128.513	123.382	88.9636	161.403	130.077	168.932	158.313	122.676	99.8483	75.7205	93.1175	79.7279	65.8757
TCONS_00000844	42.1573	5.69264	10.2077	7.31689	5.01335	5.56636	14.2044	19.3931	10.9257	10.3996	12.8153	6.31217	17.8749	8.72361
ENST00000580476	42.1415	116.53	110.894	63.2224	36.2533	51.7889	57.5707	47.0444	41.4118	24.9393	21.6423	36.9711	100.208	125.312
TCONS_00000834	41.9025	0	0	0	0	0	0	0	0	0	1.88468	0	0	0
TCONS_00000809	41.8968	1.16941	47.6771	26.6849	27.086	41.9021	27.3316	5.14518	9.40823	0.870014	17.4806	4.66563	68.4668	0.512353
TCONS_00089708	38.863	156.013	134.746	94.9658	86.5639	90.7932	105.037	87.0481	99.7459	70.1177	73.7166	106.408	112.306	189.594
TCONS_00000846	35.2475	0.104453	14.1918	13.169	11.6242	14.6468	5.06218	15.5446	0.096141	9.80744	21.07	10.7616	35.1767	15.1725
TCONS_00224607	33.1914	0	0	45.3428	0	80.002	0	47.1587	26.2168	29.3805	19.43	0	0	47.2711
ENST00000424349	30.0436	14.5193	12.1521	11.0476	19.4086	22.7929	21.2786	24.1824	18.4784	24.7656	14.0152	6.91459	9.56749	11.2612
TCONS_00032406	28.6238	53.2758	57.5933	52.462	73.3299	80.2619	84.9708	76.7567	49.7328	51.8216	46.8568	55.6135	41.3938	52.8256
ENST00000554988	28.3997	30.9759	56.7701	31.2506	22.626	49.0009	26.7959	26.795	66.2872	16.5138	19.725	15.7567	85.8367	75.571
TCONS_00238672	26.5213	61.9611	70.2312	58.7774	95.5455	101.483	105.473	93.6588	67.2415	57.4897	48.2405	69.2001	50.7088	68.9458
TCONS_00324326	24.3976	79.4233	54.1725	68.6592	62.4476	71.8478	48.9251	70.6271	68.2642	40.7806	39.6894	60.7374	62.3657	48.522
TCONS_00000815	24.0858	1.70531	0	0	0	4.59463	0	0	0	0.028083	0	0	0	0
ENST00000563192	23.2317	48.489	36.9817	40.6601	48.7831	44.8363	50.4484	50.9728	53.9005	44.2115	29.6342	33.0568	20.9654	50.4354
TCONS_00361649	22.9952	0.417236	0.341778	0.019392	0.022469	9.82983	0.037209	11.4749	5.26695	10.3494	16.7373	9.06103	0.033283	5.29514
ENST00000618132	22.5746	5.67331	6.85135	10.1099	7.71761	10.4593	0.947754	1.30563	6.15353	1.67476	2.74253	4.92947	9.73392	11.6414
TCONS_00059730	21.6364	23.8838	26.0112	23.7824	26.73	52.8301	39.6938	37.2147	22.4183	26.4209	23.9555	34.7756	24.1727	49.8721
TCONS_00093253	20.771	31.954	37.4629	31.2025	54.1763	45.2105	37.548	32.6086	17.8559	23.9324	37.886	27.9912	28.5601	26.1678
ENST00000363442	18.6848	46.1454	44.159	52.5466	39.419	46.6742	43.574	33.1731	39.5914	40.4237	34.0134	50.6537	58.3116	55.189
ENST00000331944	17.8943	65.1323	61.9868	22.8521	25.8438	43.4194	31.2762	35.3968	18.528	20.0794	22.8112	54.4976	37.173	65.3563
ENST00000587434	16.9012	5.35442	7.54227	5.64989	9.05286	8.12534	9.45975	11.3701	4.62505	7.19172	8.68147	8.59373	10.2319	6.70523
ENST00000443631	16.8185	21.6451	20.1871	20.2916	17.1192	19.3444	26.8719	25.2246	21.4789	16.7814	13.5517	18.4261	13.5034	19.6829
ENST00000602813	15.4518	20.5269	18.7023	20.9727	25.4099	27.104	3.66045	7.09601	29.3446	32.8287	24.8043	13.5226	14.3893	14.8905
TCONS_00000820	15.0807	0	0	0	0	0	0	0	0	0	0	0	0	0
TCONS_00154333	15.0298	6.35077	4.32781	3.93029	0	6.44341	2.39233	5.52787	3.62948	6.21139	9.59402	10.487	8.57051	5.9158
ENST00000426200	14.9368	9.80047	10.9503	9.98854	13.1275	15.1068	14.1732	12.2597	13.029	22.5008	12.3218	10.6071	9.80738	7.70061
ENST00000602520	14.0074	41.0243	28.4602	24.5446	24.977	28.5786	39.245	29.8461	33.6022	20.9409	19.8535	24.855	25.3632	37.5794
TCONS_00186714	13.6607	16.6634	15.2254	16.218	14.4947	17.1971	18.9165	22.744	16.5781	14.2706	17.1747	36.6206	17.7856	22.6934
ENST00000365188	12.8885	24.1222	22.426	18.6022	23.1681	28.5987	33.0847	21.5559	19.4471	17.9088	19.2976	36.022	21.3923	23.3722
TCONS_00000819	12.4924	11.4141	20.049	23.252	0	0	0	0	0	0	6.95181	0	0	0
ENST00000582866	12.3724	2.86274	3.9964	3.45064	2.96269	3.0853	3.32689	5.262	3.05691	4.27759	3.00502	2.18469	2.99351	0.718242
ENST00000432120	12.1269	2.50766	2.29893	1.99027	1.82558	2.508	3.1791	4.32029	3.19148	3.62467	2.32669	2.4401	3.13857	2.2159
ENST00000425081	11.9381	12.7747	9.31003	12.0427	13.593	18.4962	19.4157	13.2394	12.1859	15.2268	10.1348	14.5569	9.51365	12.4911
ENST00000416970	11.8087	11.2415	15.6468	16.4791	19.0558	14.7595	10.7234	19.0706	27.2463	31.7552	25.2929	23.6834	18.302	22.8123
ENST00000546580	11.7903	15.2735	20.1619	28.5117	25.8989	26.8767	18.7375	16.9257	13.7587	16.0609	16.1788	23.9541	18.4459	21.0192
ENST00000631190	11.3094	4.06875	5.0458	3.92053	2.79606	4.62144	3.85706	2.92599	2.44204	3.55638	2.46097	2.92532	3.61514	3.41553
TCONS_00167781	11.2298	0.023999	5.38422	5.06851	4.76356	6.45143	0.029847	5.70871	4.40736	9.83858	7.74821	0.038895	0.080269	3.89866
TCONS_00310737	11.1299	10.8118	12.3856	10.5048	16.2715	14.8498	18.505	16.3235	10.5693	11.9195	14.6498	15.8171	14.7317	10.3107
ENST00000617920	11.0715	8.35925	12.6245	13.0182	12.3214	10.7011	8.96637	8.40441	12.8307	15.8447	12.9541	11.6373	9.87081	8.62531
TCONS_00152907	11.0583	15.9362	18.1169	16.5075	29.843	27.263	30.2156	30.1422	20.3396	18.8151	14.867	21.7702	19.8109	19.541
ENST00000364558	10.2681	18.9768	17.9477	11.5298	10.0351	13.6198	16.5855	14.1986	10.0361	10.283	10.2316	14.2438	11.5828	11.265
TCONS_00209006	10.0963	17.7726	17.0921	19.2047	21.8144	19.1238	24.5223	20.6879	23.381	23.7119	20.0117	19.767	19.092	17.1321
ENST00000620266	9.07882	4.28099	4.7804	4.20589	5.37777	5.68407	5.26598	5.72255	2.94843	4.68293	5.94859	4.25678	4.75862	3.84946
TCONS_00323951	8.98247	132.182	58.6837	0.011294	47.9187	0	27.9975	21.7006	0.000571	23.941	0.02581	17.8206	21.1465	23.4778
ENST00000625445	8.75091	2.86385	4.21648	3.40501	0.417458	2.19274	2.22705	3.6214	3.38852	4.46961	5.30545	3.46105	3.8897	3.18421
ENST00000437764	8.74594	12.4776	10.3809	9.23801	9.62819	12.0825	14.4635	11.0885	9.1053	10.3595	7.43507	19.1175	8.23157	12.3624
TCONS_00334678	8.67654	40.7994	22.649	8.33898	23.1421	27.5661	22.004	18.4392	16.3194	17.5105	6.64112	13.9862	17.003	13.9651
TCONS_00403870	8.65597	5.67217	0.386302	7.92661	0.013841	7.08901	0.071315	6.34352	3.98743	6.75042	0.178344	8.48077	6.52103	7.0453
TCONS_00297645	8.32909	14.0475	13.7663	11.5413	6.89399	6.04723	13.9786	7.74771	5.08685	2.93092	2.88507	26.6935	17.926	27.6667
ENST00000643589	8.00251	29.2698	20.7804	24.6822	15.3786	15.0916	15.2164	13.8336	61.1589	18.0776	18.9528	19.203	13.1652	11.5509
ENST00000371743	7.99124	12.3389	16.0502	21.2362	19.6967	14.0809	14.3852	19.3898	23.5565	34.5894	67.2431	44.0037	32.8978	39.7793
ENST00000652484	7.91165	12.5424	11.0767	10.2494	11.2249	11.0424	14.3229	13.0843	13.2062	12.4648	10.5441	13.3343	10.2898	11.9142
ENST00000613584	7.77935	5.86162	6.24452	5.83345	5.59922	6.54997	7.08841	5.27815	4.70689	6.38721	4.82444	4.77927	5.01027	3.28207
ENST00000580867	7.69735	8.4475	6.00884	4.81199	4.1558	17.4355	11.3948	13.3067	9.96869	3.44581	2.81598	2.29528	3.23098	3.03511
TCONS_00000179	7.67979	3.96573	5.2455	6.9525	6.24265	5.85597	5.45812	4.64601	5.74446	6.96431	6.52506	7.54402	6.07501	4.51858
TCONS_00314233	7.61238	15.7246	14.4829	12.2523	22.0741	20.0289	23.1407	22.0944	13.4667	14.1936	12.958	18.6164	9.86698	13.7631
ENST00000467530	7.45892	7.02374	5.43157	3.17763	2.23451	2.48788	2.56984	2.77787	1.89317	1.99467	3.84204	3.03409	2.79594	1.64147
ENST00000295549	7.36274	4.8328	4.46047	4.20167	4.34022	7.3748	8.04398	6.58075	4.71312	4.75126	0.413753	6.55032	6.10021	5.55551
TCONS_00000808	7.26919	0.100574	3.36778	1.03148	4.29179	0.378753	0.969606	3.87491	4.55942	0	0.001309	0.345245	1.14232	0.264359
TCONS_00000833	7.24943	0.004728	0.002367	0	0	0.020047	0.033318	0.034662	0.022916	0.014906	0.070159	0	0.030169	0.005681
TCONS_00377055	7.17661	8.21706	7.82555	7.22133	8.99666	13.2369	10.8614	8.82314	4.93226	5.93353	5.59778	8.22268	7.66058	8.29604
ENST00000441722	6.9129	14.5377	15.1937	17.356	14.3127	13.2255	15.0088	15.5443	15.5143	21.1269	25.2681	23.041	18.6413	21.1748
TCONS_00354168	6.63854	1.96091	0	2.37729	0	5.32843	0	1.77998	0	0	4.03028	0	7.96787	4.69707
TCONS_00093648	6.58433	12.5244	16.1594	15.9413	15.5585	13.7781	10.6724	9.22686	7.36623	11.7921	11.617	22.1086	20.1804	19.7415
TCONS_00376367	6.43987	11.6527	10.7865	12.2027	9.26279	13.6094	13.3739	10.5346	9.14435	8.04405	4.79894	11.284	10.4666	9.24589
ENST00000452399	6.18529	0.754371	5.68608	1.52586	0	4.94518	7.7425	3.70334	0	2.87111	3.81352	2.99927	5.71508	0.054586
TCONS_00010685	6.01977	1.82683	3.67745	4.00305	3.05411	4.67504	2.34974	2.94186	0.817984	2.6313	2.36949	3.8248	3.6984	3.72617
ENST00000619201	5.98119	1.87444	2.03746	1.71317	1.84827	2.58162	2.48175	2.94742	2.36774	2.02585	2.23965	1.62289	2.03652	0.866063
ENST00000530422	5.91734	3.66632	6.11039	4.78467	3.96908	5.57436	4.47569	9.56946	2.04283	3.37252	5.8868	10.1955	9.08857	16.0792
ENST00000518481	5.90601	6.31786	7.2903	6.78238	9.5489	11.0278	9.98712	9.74773	6.62882	6.13431	6.02226	9.0257	7.86342	10.5154
ENST00000429630	5.78176	7.0998	4.88179	4.95358	5.83581	5.33597	10.6655	7.20134	4.49369	4.65906	3.60552	6.74377	4.22319	6.36481
TCONS_00069999	5.71921	0	0	1.37312	2.22524	0	1.52341	1.38917	1.22493	1.25815	7.1e-05	0	4.3609	1.48102
TCONS_00150054	5.60498	5.95342	7.74532	6.26175	8.84147	10.2643	8.5761	8.45258	4.54673	4.79203	5.11444	5.73588	6.64901	6.91076
ENST00000569087	5.58196	1.01058	1.73378	1.69138	1.52365	1.50804	1.33465	2.5064	1.5191	2.08479	1.46419	1.05725	1.45369	0.354613
ENST00000438436	5.52205	5.23526	6.37274	7.55603	8.23153	7.18451	5.82752	3.51665	3.54738	5.36435	6.23884	9.8078	7.36475	4.42363
TCONS_00224609	5.45617	17.9476	61.567	3.84557	127.198	12.1154	100.273	41.1912	13.5498	9.60535	13.6718	66.6699	47.5295	25.7793
ENST00000406213	5.43454	8.29356	11.1603	7.9148	7.47847	11.6075	9.32396	8.48788	5.57972	7.72983	4.36639	7.79648	8.56879	10.5046
TCONS_00000476	5.39156	2.34105	2.3554	3.75578	0.409359	1.45861	0.844316	0.958383	1.20322	0.836891	0.830276	1.00466	0.710141	0.792165
ENST00000509788	5.37059	4.75904	2.78322	6.20945	8.18935	11.8571	9.51917	6.61494	2.24293	3.2451	5.01711	5.40978	5.16423	9.76783
ENST00000610813	5.29338	3.09236	3.0725	2.96032	3.55344	3.36702	3.40322	3.42739	2.6515	3.13009	2.31531	2.24788	2.91523	1.76381
ENST00000518073	5.28232	9.93015	7.77858	5.93913	4.29638	4.41466	11.9762	10.4402	9.29894	8.65788	7.54168	15.0774	4.69444	12.5868
TCONS_00000767	5.26897	1.01707	1.43615	1.11937	1.72943	1.17916	1.17071	1.60404	0.991297	2.80134	2.429	2.31441	2.7853	0.797738
ENST00000619432	5.24063	7.68314	7.59352	13.9329	14.9787	10.4164	19.8253	29.7383	31.3781	26.1243	18.2336	16.2463	7.69056	11.5025
ENST00000562038	5.21223	2.41245	3.73552	3.67406	3.02971	2.31784	2.70618	3.67649	2.42167	3.18845	1.76939	1.76915	2.18793	0.760359
ENST00000580828	5.1143	9.52677	8.6352	7.82628	4.28554	4.3422	4.57233	5.15669	0.021873	6.49159	0.021984	3.47582	4.29012	7.27082
ENST00000566956	5.05919	5.3761	2.8277	2.65151	3.72046	6.47752	8.67423	6.08654	3.56941	4.07183	3.43787	5.45034	3.23226	3.16066
ENST00000624682	4.94756	4.06601	7.2122	9.80407	7.08626	6.93114	2.61498	1.82302	2.8395	6.29951	4.56422	4.82069	5.49452	5.45274
ENST00000544553	4.88845	8.14673	8.43739	9.41273	10.2317	8.21763	18.8951	20.8567	19.7083	17.1245	12.6729	11.5237	9.72179	8.99394
TCONS_00000813	4.88072	510.243	487.95	466.004	1.58234	1.59569	1.23705	47.4268	1.95675	465.652	2.23126	1.56015	93.6746	401.371
TCONS_00060921	4.8129	4.74925	6.70921	6.46995	6.90179	7.16984	7.45733	7.72537	5.85976	6.14458	5.69047	4.58926	5.68653	6.80134
ENST00000581117	4.51408	2.97656	2.62605	3.02101	3.75288	3.66798	4.18861	3.10085	1.21437	1.00962	2.23169	4.67358	3.86099	3.23412
TCONS_00070787	4.48166	3.1926	2.45412	2.46381	3.17229	3.43635	3.53791	3.29465	3.48742	5.43295	3.95242	5.55858	4.89255	4.08596
ENST00000416202	4.44741	10.7907	8.80537	7.37354	10.8751	9.72127	12.8692	10.4538	8.53837	8.06344	7.86651	14.9115	9.83694	10.4825
TCONS_00000830	4.43324	1.34122	2.22409	0	35.8117	4.29189	0.131989	45.0002	11.6538	3.33699	5.44978	2.99133	0	0
TCONS_00090151	4.42645	4.83714	5.56502	4.68458	3.95088	1.72276	4.62386	5.00002	4.85263	7.60264	6.77422	18.1546	5.43751	9.26751
ENST00000612522	4.36229	2.97855	3.60381	3.43108	5.382	5.43417	3.81074	5.02694	3.85206	5.55525	5.14475	4.2577	5.13101	2.57172
ENST00000426725	4.32951	5.22936	5.52337	5.1411	6.0398	6.23971	8.14495	6.16177	4.8714	5.48931	4.31558	7.97509	5.12087	4.18012
ENST00000542466	4.16226	4.40162	6.17309	5.29221	5.23869	4.52398	3.51355	3.06386	3.83058	5.2508	3.54244	3.64717	4.56423	3.51793
ENST00000615535	4.15198	7.01123	6.45466	8.98642	5.68792	7.16211	11.7903	10.4194	4.8211	8.23443	8.87674	11.9891	7.50881	11.6678
TCONS_00192197	4.11234	4.36543	3.11089	2.79586	2.46075	3.77792	3.79051	2.78522	2.45995	2.60328	3.63817	4.51409	3.11082	4.63127
TCONS_00002229	4.11109	2.41379	3.11201	2.51542	3.09753	2.75853	2.85353	2.81763	2.07036	3.0099	2.64333	3.72625	5.2033	3.49362
ENST00000504520	4.05768	3.2375	3.31604	4.28955	3.74755	3.49662	3.02161	4.15209	6.72514	7.17877	6.22317	6.59429	4.22488	4.11057
ENST00000573866	4.04077	3.55533	3.29166	4.233	3.26516	5.53198	0.699196	0.708344	2.46116	7.21517	9.87445	2.91543	3.05227	2.52446
ENST00000593427	4.00404	1.1158	1.63701	1.68595	1.70868	1.46938	1.09805	2.49034	2.20433	3.66139	3.24745	1.37538	2.05864	0.964407
TCONS_00385871	3.97842	4.62003	5.06951	3.80432	6.42582	7.48385	6.37991	4.70568	2.36786	1.9183	2.51109	3.20705	3.10907	3.382
ENST00000602422	3.97676	0.999761	1.47978	1.61478	1.47945	1.30788	0.835651	1.20476	1.2681	2.26245	1.67117	1.06206	2.02228	1.4197
ENST00000446372	3.97554	2.97085	10.6249	7.77495	5.51188	5.13496	6.54861	6.00342	5.01468	4.19863	9.41357	6.67218	10.27	9.35602
TCONS_00080091	3.89433	0	0	0	0	0.6035	2.28017	2.29868	0.285504	0	0	0	0.137335	0.305329
TCONS_00331688	3.8722	4.71276	5.45303	4.50881	7.71805	7.59688	8.27391	8.19561	5.51899	4.98489	4.82777	4.36686	4.35073	4.70903
TCONS_00096901	3.86601	2.31349	2.86728	2.27806	4.8806	5.40735	4.07136	3.95117	1.85983	1.86638	2.32247	4.42586	4.27069	4.80222
TCONS_00293080	3.79429	1.1631	1.40301	1.44536	1.37905	1.15972	0.957511	0.021231	0.619231	1.86644	0.741761	0.674312	2.34602	1.00581
ENST00000534336	3.72965	0.976957	1.89105	10.4564	1.29294	2.89604	5.14233	5.84621	0.629742	1.40674	4.48239	2.18084	3.52005	2.53094
TCONS_00289603	3.70955	0.168677	0.011692	0	5.74203	6.49047	0.101582	1.30516	7.31226	1.98962	2.75616	0.066589	1.5933	3.869
TCONS_00193870	3.66946	4.14464	5.79744	5.41847	7.77799	8.96515	7.96264	6.49969	3.55835	3.58006	4.60207	5.33946	5.03682	6.85721
ENST00000612598	3.66325	3.97668	4.6012	3.79053	4.34769	3.45892	4.46108	4.31929	5.02331	5.6029	5.11396	4.69324	3.52209	2.63488
ENST00000508832	3.65127	2.57551	6.82864	0.154874	0.009085	9.5584	0.088518	0.112793	1.90604	2.11197	0.082223	0.004031	0.106154	2.60444
ENST00000566639	3.60561	2.82777	3.63955	3.85659	3.48511	3.53744	3.07455	3.48457	3.80925	4.24399	3.95377	3.86853	3.5049	2.13435
ENST00000409569	3.5954	0.507468	0.766165	0.042064	0.02782	0.366205	1.34173	0.613534	0.193876	0.036415	0.024887	0.035411	0.034684	0.073221
ENST00000475406	3.59025	6.76666	7.50347	6.66428	5.26019	4.64154	6.97621	6.49632	7.2682	5.33092	2.79548	5.37748	3.53019	2.30928
ENST00000426161	3.59023	3.15552	2.34876	2.98656	3.36856	3.47642	4.60066	3.45179	2.75131	2.83158	2.50451	3.3119	3.17226	2.70364
ENST00000505339	3.56234	2.07984	2.06457	1.06815	2.33218	2.0136	2.39183	0.150126	0.309996	0.27338	4.24626	9.46543	1.82156	1.36386
TCONS_00381139	3.54884	4.01642	3.79472	2.50192	3.04894	4.57928	4.26544	3.86974	2.26063	1.75625	1.66328	2.52021	2.57881	2.96782
ENST00000513560	3.46188	0.04647	1.3508	1.86712	2.0724	0.013564	1.84284	0.962466	1.7487	2.19116	2.02241	0.202462	4.57096	1.88467
TCONS_00289605	3.41697	7.32309	6.01783	4.08186	2.79229	3.7059	10.5742	11.0926	9.52848	6.69383	3.31441	6.11527	5.18971	6.89244
ENST00000592381	3.39733	3.04539	1.64523	3.45517	5.74782	4.21343	2.73456	2.71184	4.57733	5.97352	4.1159	4.19702	3.23987	3.43313
ENST00000439703	3.37914	4.06663	3.62839	3.6408	3.89113	7.0688	3.36229	2.59423	1.98635	1.8586	2.22744	5.46424	3.25027	8.07485
TCONS_00081584	3.37565	4.25382	4.21701	3.27165	5.86831	5.79697	5.0924	4.62183	2.74493	3.28469	4.30906	5.30965	5.1127	4.21064
TCONS_00000481	3.25934	1.36132	0.827158	2.22766	0.241796	0.342121	0.201707	0.29805	0.24065	0.173923	0.21105	0.132322	0.317831	0.247388
ENST00000440079	3.24918	1.85392	1.67841	2.43927	2.06295	2.584	2.77128	1.49235	1.20362	1.73301	1.65183	1.55025	1.97716	1.88614
ENST00000578482	3.23467	2.18037	3.47	2.76515	5.49555	5.35228	5.10632	3.26855	1.95704	2.87911	2.87108	3.48254	2.57934	3.71555
TCONS_00067801	3.22471	0.617104	0.176662	0.03433	2.52665	0.186468	0.027429	0	0.020451	0.54211	0	0.041782	0.360915	0.046586
ENST00000513358	3.22398	0.761182	1.0774	0.816895	1.1233	0.79802	0.730293	0.531552	0.858327	1.57397	1.6131	1.31738	1.63676	0.627519
ENST00000608319	3.17721	2.53557	1.43969	1.69232	1.90161	1.54891	2.87263	1.88324	2.49963	4.43749	2.60026	1.74805	2.30525	1.20025
TCONS_00203934	3.1682	0	0.271806	1.54457	0.925865	2.81545	0.647065	1.84658	0.444993	0.52967	1.20452	1.62587	3.18613	2.44451
ENST00000607953	3.1573	3.36471	2.05584	2.63683	2.1869	3.81133	4.88603	4.27615	2.39784	2.17485	2.92583	7.50816	3.32365	5.57976
TCONS_00000829	3.11094	6.62563	5.43759	3.96604	1.95271	2.38343	5.08964	1.80816	4.02229	1.74715	3.19718	1.95786	3.65029	942.102
ENST00000554169	3.10353	1.93336	2.00201	5.19344	4.8404	5.39132	3.77577	4.65467	3.30401	3.85041	3.64907	3.76307	3.0901	1.61913
TCONS_00338505	3.04365	0.064163	0.037882	0.048959	0.015017	0.041839	20.7593	0.013135	0.016058	0.005805	0.026629	0.01187	0.025045	0.019088
TCONS_00242122	3.01736	2.87267	12.3553	14.2456	4.2055	9.21719	1.37476	2.60873	4.01729	4.69219	6.37618	4.66083	5.714	4.07352
ENST00000586949	3.01453	2.96929	2.94767	2.32218	4.66505	4.91361	9.86598	5.1293	6.06638	3.56872	4.16163	16.6627	8.40516	8.7122
ENST00000501079	2.99412	2.53973	2.80836	2.47756	2.27528	2.49154	3.2e-05	3.5e-05	2.7e-05	2.9e-05	1.94029	5.1e-05	3.31871	2.87661
TCONS_00125514	2.98006	3.00346	3.30556	2.85155	1.94505	2.75809	2.61043	1.76334	0.849209	1.55372	1.98344	3.01446	2.49242	3.79407
TCONS_00328894	2.92294	4.33984	4.48288	4.60076	4.04035	4.26192	5.42558	4.63417	4.51809	3.59516	2.90178	4.4704	3.33032	3.63841
TCONS_00050660	2.90774	2.94881	4.20119	3.70922	4.58894	5.27288	4.46956	3.51305	3.68596	5.73945	4.01453	4.33731	4.10185	3.44261
ENST00000517411	2.87614	1.73732	1.6282	1.43401	1.99069	3.6694	5.8618	7.40543	5.30774	3.8949	0.847796	3.04921	1.91999	4.69897
TCONS_00000859	2.85455	0.085276	0	0	0	0	0	0.068251	0	0	1.47198	0	1.09841	0
ENST00000593491	2.84639	8.63026	6.568	5.26627	5.21347	5.2414	9.39108	8.75984	8.49382	7.3654	5.82871	5.92228	2.54564	5.82141
ENST00000608684	2.8377	3.71968	2.40367	2.78098	2.32158	5.6767	0.763448	0.652015	1.39067	1.65426	2.61798	2.00955	2.68245	4.11097
ENST00000508179	2.82175	1.98227	0.389108	1.59911	2.04773	3.60241	5.31871	2.20252	1.53898	2.07743	2.31468	2.07297	2.70876	2.40352
ENST00000612365	2.81449	1.08414	1.62352	1.42081	1.25667	0.847405	1.14181	1.38876	0.338391	0.777319	1.04318	1.87662	3.81811	1.78476
ENST00000417721	2.79161	5.57846	4.80607	5.08427	4.50275	4.46636	5.74861	6.54866	8.88605	6.67902	5.17877	5.60188	4.59621	7.1692
ENST00000618589	2.78715	5.63473	4.41586	4.51059	6.75598	8.4257	0.584719	1.66972	2.96599	4.19018	4.61541	4.88232	3.52928	7.02853
TCONS_00083037	2.78548	6.92385	4.53238	6.49931	5.91022	4.69653	5.7751	11.1531	8.67462	10.0356	4.34006	5.77742	4.22117	6.74413
ENST00000602669	2.77063	0.821974	1.35729	1.29397	1.51171	1.21538	0.673076	0.847754	0.804905	1.60725	1.45044	1.18412	1.4536	0.989278
ENST00000609350	2.76238	0.032579	0.02458	3.28932	0.028408	0.024619	0.027608	0.024475	0.018138	0.022323	0.016554	0.02009	0.02368	0.016283
ENST00000554749	2.7597	0.622854	1.1818	1.05819	0.872939	1.11322	1.06269	1.4413	1.04438	1.40331	1.59283	1.48732	1.90388	0.781449
ENST00000602361	2.75634	7.25266	7.30548	5.05521	1.49389	2.41789	1.57405	1.9149	2.54014	1.37351	1.3903	1.35604	5.27686	6.61178
ENST00000493013	2.72813	6.55537	5.11848	5.02867	7.74589	8.29231	11.0578	8.57075	7.71783	5.25921	5.6133	8.39423	5.71931	6.10704
ENST00000549807	2.72567	2.98668	1.84344	1.96367	2.30189	4.38033	3.08825	1.63799	0.991776	1.01287	2.88121	7.97567	3.55793	7.99558
TCONS_00191783	2.69011	0.913	1.35891	1.09673	0.026512	0.024343	2.00243	2.15558	0.911794	1.157	0.082727	0.049619	2.01627	1.70272
TCONS_00234853	2.68957	2.13197	2.2284	0	0	3.37133	2.85551	2.23718	1.76473	1.90315	1.79831	2.3567	3.21755	2.16355
ENST00000602478	2.65274	4.44529	3.72529	4.06811	8.63637	4.94098	0.499553	0.812445	3.41513	4.19148	4.03563	2.82977	3.10446	4.85219
ENST00000590513	2.58214	1.71225	2.02759	1.93332	2.67097	2.17578	0.966777	1.36889	2.06968	2.48836	2.30238	1.83889	2.54788	1.91635
ENST00000535922	2.56911	1.06561	1.82781	1.09647	1.41383	1.55121	2.68263	2.67584	1.51999	2.1275	1.63001	1.63395	1.54326	0.728446
ENST00000644040	2.56695	0.945823	0.951349	0.945668	0.909549	2.65359	1.21888	1.88821	1.04428	1.4445	1.06973	0.877578	0.646264	0.622526
ENST00000623095	2.55988	0.002924	0.003473	0.005757	0.016541	0.000636	0.011268	0.038248	0.010998	0.00924	0.018836	0	0.006465	0.000375
ENST00000622750	2.55755	0.620647	0.461701	1.23034	0.337478	1.71261	0.372893	2.26504	1.3891	0.50761	1.46762	0.874113	0.210792	0.546514
ENST00000436596	2.55375	2.00141	2.75348	3.90041	3.56982	1.93628	3.02895	2.24443	2.95459	4.17493	1.25131	0.551043	1.29428	0.83653
ENST00000413915	2.55101	0.569845	0.881065	0.893567	1.46291	0.931375	1.18368	2.75397	2.97396	3.60405	1.42617	1.44812	1.25049	0.675214
ENST00000591372	2.54291	0.645243	1.09929	0.991289	0.844127	0.672456	0.683419	0.86293	0.843803	1.52644	2.20634	0.946551	1.53047	0.447302
TCONS_00360994	2.53655	0	0	2.95195	1.77289	0	1.4565	0	0	0	0	0	1.83794	0
ENST00000612568	2.51601	1.96836	1.93828	1.3646	1.37731	1.45061	1.52704	2.25712	1.6827	2.06873	1.97	1.8449	2.19647	1.67679
TCONS_00303868	2.50842	1.61243	0	1.92391	1.02944	1.87941	1.44912	0	0.59631	0.901949	1.14275	1.41158	2.4054	0.965309
TCONS_00376708	2.50358	2.5215	2.09497	2.56213	1.13963	1.84777	1.44105	0.75482	0.567215	0.877804	1.24751	1.82139	1.48275	1.79649
ENST00000581211	2.46656	1.80596	1.41822	0.984691	2.03769	2.59215	1.48204	1.2866	0.702485	0.830087	1.0662	1.26465	1.50782	0.869518
TCONS_00343838	2.46472	2.02403	2.01195	1.6737	0.621613	3.4832	3.91864	3.37991	1.60982	0.291397	1.79816	1.4638	0.933669	2.90027
TCONS_00361498	2.44179	2.76424	3.64981	2.96352	3.96103	4.81238	4.30624	3.88095	2.11288	2.68817	2.578	2.33299	2.69233	2.29424
TCONS_00000694	2.41724	3.30429	3.967	3.02389	4.64686	3.59363	5.06666	4.68515	3.24696	3.29308	2.64008	2.79419	3.30547	2.2173
ENST00000606114	2.41569	0.70574	0.690478	0.971348	1.21877	1.02517	0.658274	0.817786	0.571779	1.56117	2.08169	1.0966	1.29981	0.569839
TCONS_00012433	2.40888	1.97253	2.57492	2.80374	2.66887	2.332	1.4079	2.27528	2.82063	4.6165	3.98027	2.74329	2.30495	1.91948
ENST00000421685	2.39527	3.14952	2.15995	3.63966	4.63174	2.85053	2.80374	2.8439	2.5475	2.36426	2.17593	1.95868	1.61425	1.25731
ENST00000371162	2.38485	2.75636	2.75516	1.42756	1.70759	1.6585	1.05936	0.678525	0.020054	0.397841	2.65929	3.30409	3.23567	2.6644
ENST00000430222	2.38238	2.65358	2.53655	3.18924	2.1965	3.31513	2.58328	2.311	1.65959	1.38017	1.54646	2.88726	3.83924	2.93675
TCONS_00278717	2.37176	1.34577	1.79744	1.54355	2.12461	2.0548	1.81756	1.78505	1.07095	1.43296	1.56545	1.57841	2.24757	1.51342
TCONS_00000308	2.36407	0.366768	0.260445	0.134937	0.066525	0.030986	0.007359	13.2735	0.154721	0.154572	1.68101	6.59816	2.44008	0.130028
ENST00000607783	2.35626	0.277125	0.479404	0.471563	0.397808	0.6056	0.372723	0.627204	0.311845	0.79965	0.748914	0.286642	0.566266	0.20117
ENST00000466734	2.35613	0.008387	0.009497	0.001636	1.62766	2.09332	0.006822	0.003385	0.002457	0.009088	0.01172	0.008725	0.005677	0.004808
TCONS_00182465	2.33665	2.34294	2.67457	2.05341	3.05327	3.40378	3.87499	3.59743	2.58656	2.89971	2.63003	2.9673	2.83849	2.21056
TCONS_00273691	2.324	0.908147	0.970306	2.36167	1.98694	2.12089	1.10997	0.910206	0.501455	1.42759	2.13923	1.35959	1.2706	0.737318
ENST00000603308	2.31496	3.10625	1.87488	1.85155	2.4267	2.17906	1.88151	1.95989	1.44783	1.79036	2.78679	2.11071	2.37224	1.74191
TCONS_00301267	2.2864	3.03144	3.28973	2.17331	1.70634	1.3314	2.953	2.92299	1.66254	1.44786	1.45603	3.26913	1.85145	1.89446
TCONS_00093649	2.27748	6.28186	7.03458	10.268	6.25527	6.84956	5.03775	3.37671	2.762	4.37943	5.78633	9.2887	8.01289	7.85583
TCONS_00224606	2.27593	0	0	13.2746	0	21.3513	0	5.33701	2.69527	6.65483	1.48742	0	0	2.57698
ENST00000578968	2.26991	7.17862	8.61341	3.46135	6.13019	2.91688	4.36367	7.58879	7.42691	8.52501	19.8186	8.53763	4.63256	5.87843
TCONS_00236417	2.26967	2.92474	3.11709	2.66875	4.37907	4.3199	3.23573	2.47634	1.80185	2.06637	2.72853	3.05813	3.13536	2.76507
ENST00000591501	2.2511	1.99203	2.05093	2.97898	4.18219	3.03223	0.941795	2.13298	2.19875	2.98245	2.53588	2.12758	2.00067	2.16354
TCONS_00072355	2.24934	1.59994	2.44311	2.52809	2.49415	3.79301	2.22131	1.87651	1.57971	2.29	2.79558	2.65665	2.17097	2.20469
ENST00000602819	2.23919	3.04264	4.46206	3.96642	3.09704	3.40095	4.09293	4.27794	3.39097	3.66792	3.86146	5.99812	6.26029	11.6321
ENST00000651681	2.19808	0.74875	0.754534	0.803356	0.778436	0.702128	0.758931	0.911825	1.02453	2.57688	2.65811	1.37075	1.33772	0.545056
ENST00000425267	2.195	1.18244	1.29562	0.812465	0.64368	0.821544	2.42177	1.79238	1.05959	1.46711	2.50289	1.22368	0.769508	0.78927
ENST00000602954	2.18121	1.2656	0.942564	1.0651	0.760292	1.04608	1.27664	1.35947	1.29892	1.33364	1.06526	0.630373	0.720256	0.888181
TCONS_00301775	2.15498	0.339979	0.404028	0.395388	0.588246	0.639824	0.40428	0.416099	0.139735	0.246829	0.797103	0.653677	1.08007	0.411703
ENST00000611728	2.15222	1.83883	2.6226	1.49971	0.791767	0.911786	0.98424	1.37957	0.933557	1.73526	2.02461	1.21287	2.02347	1.0617
ENST00000451424	2.13127	1.34318	1.65379	1.46677	1.85689	1.56322	1.99482	2.40209	1.56093	2.29912	1.71557	1.26085	1.47693	1.00023
ENST00000609974	2.12321	1.65814	2.42407	2.54145	3.71444	2.67544	3.30482	3.30211	2.31799	2.91911	1.8389	1.90017	1.89319	2.20781
ENST00000607415	2.1227	0.121761	1.44701	0	0.008563	0.022025	0.081621	0.05797	0.014706	0	0.029668	0	0.025994	0.092318
TCONS_00192105	2.10713	1.08536	1.34694	1.34088	1.45815	1.55637	1.4388	1.66827	0.781938	1.53258	2.49899	1.39736	2.5151	0.768248
TCONS_00005540	2.10499	2.52057	5.08752	2.31242	3.9615	2.26575	5.2953	1.26886	5.71729	7.51457	4.14993	3.78608	2.47481	0.324852
ENST00000450671	2.1035	0.420285	0.332247	0.344773	0.474175	0.510665	0.523974	0.64295	0.391818	0.40389	0.477335	0.615283	0.577866	0.356927
ENST00000550263	2.09557	3.88114	3.70187	3.76414	4.03479	2.97952	5.60609	5.58533	6.02477	6.05597	4.88635	4.59666	4.03689	3.36092
ENST00000418525	2.07931	5.70384	5.59175	5.96739	4.1514	4.56558	3.83057	3.36289	3.01354	4.08134	9.25828	17.3133	6.10195	8.75296
ENST00000598112	2.07415	0.72049	1.13798	0.724803	0.736406	0.808366	0.865153	0.842316	0.739545	0.92422	0.59778	0.454338	0.635367	0.259796
ENST00000610701	2.0463	0.738469	1.07214	1.32207	1.42294	1.6541	1.81578	1.60818	1.30654	1.92085	1.59755	1.38783	1.92335	1.20691
TCONS_00321977	2.04547	0.499725	0.778588	0.926054	0	0.780445	0.279055	0	0	1.17985	0.781591	0.610493	1.25127	0.826905
ENST00000585285	2.01157	0.826288	1.39529	0.953476	2.38118	1.64453	1.85028	1.65473	1.29699	2.14599	2.75822	1.97771	1.99576	1.61792
TCONS_00086720	2.00025	2.61634	2.91265	1.96153	4.75437	3.84936	3.89008	2.1987	1.99065	2.64191	3.2629	4.70295	2.93403	3.11065
TCONS_00195538	1.97554	1.86063	2.3049	1.61175	2.71757	3.19841	2.84149	2.72018	1.18023	1.08516	1.28967	1.55062	1.83587	2.0411
TCONS_00000861	1.96484	0.004103	0.0103	0.017774	0.003618	0.012341	0.001005	0.023099	0.012295	0.028924	0.005513	0.004474	0.001149	0.001147
TCONS_00003354	1.96165	1.77323	2.25462	1.73807	2.65891	3.04523	2.82686	2.8681	0.963954	1.10669	1.38095	2.56388	2.00811	2.45137
ENST00000598616	1.95314	2.39061	2.77814	1.85259	2.23172	2.25097	2.61488	2.52043	0.955408	1.98026	1.83539	2.21794	2.03283	1.86834
ENST00000416066	1.93014	1.22983	2.08549	2.22437	1.94488	2.45479	0.530689	0.965166	1.84499	1.60732	1.61546	1.60686	1.65641	1.49463
ENST00000534991	1.92768	1.79417	1.48794	1.7161	2.90904	2.43928	2.7593	2.36506	1.97414	2.12807	1.97063	1.48604	1.53579	1.76436
TCONS_00309729	1.92736	3.27598	0	3.13795	4.75179	3.01857	2.38237	3.2123	5.04072	4.98141	3.75687	0	3.87647	0
ENST00000614874	1.92056	2.25204	2.43772	6.82197	2.97138	3.66544	1.47852	1.42607	0.755074	1.37446	1.65594	1.22799	1.5786	1.53583
ENST00000621900	1.90993	2.58692	0.518987	2.56381	1.05371	0.69201	0.413954	0.279249	0.169918	0.291954	2.25709	0.759548	0.460366	0.291093
ENST00000490920	1.90154	0.870955	0.714497	0.808684	1.26392	0.566886	0.571138	0.947344	1.09083	1.46628	2.24863	1.51441	2.32232	1.23665
ENST00000500741	1.89457	2.49786	3.18206	3.08475	2.00265	2.59174	0.933005	1.29676	1.71856	2.70369	4.7084	2.46148	3.04149	1.79135
TCONS_00205334	1.89306	0.832152	1.90499	1.44834	1.37581	1.20423	1.33784	1.39731	0.927353	1.29499	1.12046	0.786311	1.55248	0.864282
ENST00000506606	1.88724	1.28783	1.56184	1.62445	2.21565	1.95222	0.756877	0.621724	0.668466	0.902272	2.56426	2.98335	2.47835	1.53845
TCONS_00002418	1.88401	5.65218	4.97172	5.40095	3.86505	2.75764	6.95259	7.7489	6.94623	6.53205	5.5919	4.47991	2.89652	3.4711
TCONS_00000860	1.87905	151.52	0.033478	0.018837	0.034601	0.026536	0.009325	0.030305	93.3103	0.024224	171.112	0.010544	0.825849	0.043369
TCONS_00002290	1.87313	1.10726	2.07065	1.99631	1.80447	1.23065	1.45984	1.22013	0.984825	1.40321	1.73592	1.40864	1.28015	1.62526
TCONS_00256622	1.851	1.9168	2.29059	2.00648	1.6	1.37891	1.48145	1.75331	1.51219	2.11049	1.82547	1.48591	1.42812	1.19249
TCONS_00300789	1.8381	1.92998	2.9869	2.7906	5.06708	4.42315	2.55728	3.1766	3.2437	2.59379	2.61098	2.50755	2.70244	2.10333
ENST00000606064	1.82659	0.708325	0.852833	1.04272	0.791998	0.849288	0.515012	0.431131	0.226327	0.344313	0.651468	0.864227	0.787832	0.994335
ENST00000622856	1.8141	8.05007	6.48089	5.49052	4.38573	3.09971	8.1729	10.7276	9.73858	4.84703	3.05282	6.34089	2.48331	4.63612
ENST00000619176	1.81225	0.695332	0.958587	0.659847	1.1139	0.856846	0.448607	0.49541	0.498326	0.242246	0.868336	0.33243	0.700289	0.42029
TCONS_00297643	1.79854	2.63656	0.888178	0.695595	0	0.908179	1.9338	1.11603	0.593685	0.385529	0.611031	2.43537	3.36127	2.77317
ENST00000547794	1.78569	1.31317	0.842943	0.001064	0.835606	1.67147	2.15381	1.01719	0.401622	0.774514	0.456588	1.25063	0.724519	0.781767
TCONS_00262329	1.76993	0.959798	1.40955	1.26581	1.97922	1.92103	1.78073	2.71472	2.53817	2.60028	1.63993	1.55481	1.93651	1.17684
ENST00000608317	1.76913	1.53734	0.85812	1.11724	1.79803	1.51595	2.02363	2.19694	2.2102	2.21638	1.31758	1.34645	1.13963	1.25698
TCONS_00320715	1.76713	2.41082	4.06104	4.20474	7.38978	5.82269	3.47213	3.06647	1.92735	2.30066	3.82424	3.36513	2.94363	3.28497
TCONS_00271682	1.76531	2.39664	2.84343	2.1774	2.69446	2.61489	3.26078	2.82582	2.2186	1.72908	1.85418	1.73239	2.20884	2.471
TCONS_00146942	1.75987	0.892761	0.492424	1.05503	2.79319	1.4755	0.554917	2.39159	0.251966	0.325845	0.244982	1.73205	0.645097	0.439098
ENST00000421004	1.75758	1.15548	1.06229	1.27765	2.15786	1.95951	1.86204	0.744148	1.81826	3.27806	0.013694	0.003435	2.44261	1.70013
ENST00000608286	1.75724	1.06408	1.12092	0.580299	0.804293	1.38796	1.65978	1.65737	1.01452	0.869107	1.4086	1.32501	1.47792	1.66992
TCONS_00388066	1.757	0.834201	1.14254	1.32572	1.77685	1.5548	1.27548	1.57419	1.1459	2.13357	1.82441	1.52459	1.45472	1.1934
ENST00000363312	1.75492	0.070317	0.064225	1.55228	1.54827	2.62517	2.69634	1.55314	1.70088	0.045896	1.84292	1.9724	2.39014	4.00371
ENST00000606963	1.7488	0.237417	0.553764	0.642274	0.230134	0.142599	0.236446	0.135027	0.081388	0.189528	0.179018	0.206447	0.431371	0.253928
TCONS_00222235	1.7467	1.05679	0.053308	1.82429	0.020817	0.031651	0	0	0.005352	0	0.021546	0.070976	0	0.039153
ENST00000430166	1.73499	1.61064	0.01861	0.049812	0.022702	2.51763	1.95092	1.56527	0.061562	0.033788	2.19943	0.057088	2.45509	2.01696
ENST00000618976	1.72417	0.715715	1.37206	2.4801	0.890907	1.31966	0.500998	0.714622	0.341552	0.509051	1.20335	1.00526	1.17296	0.735593
TCONS_00000484	1.71936	0.427069	0.408232	1.90594	0	0.497903	0.2206	0.059073	0.193095	0.177281	0.027539	0.262848	0.362637	0.310656
TCONS_00196338	1.71649	0.463614	0	0.312128	0.810562	0.608775	0	0.563331	0	0	0	1.05297	0	0.493339
ENST00000602406	1.71568	0.927112	1.24509	0.878904	1.353	0.726939	0.595318	0.82791	1.27871	1.19224	0.676406	0.481563	0.5651	0.24811
ENST00000326677	1.7063	2.56643	2.62453	3.65314	4.33522	0.712696	4.10308	3.90685	1.62482	6.55008	0.613423	9.32151	4.5387	2.93814
ENST00000614364	1.70013	1.70917	2.63009	3.98372	3.09725	3.55047	2.03352	1.88704	1.96274	0.058132	3.26516	0.097204	2.17433	2.44408
ENST00000522992	1.69974	2.68056	5.08509	4.14293	2.18568	2.32369	2.56225	2.70451	2.80112	3.14337	3.71	5.6257	5.10368	7.08426
ENST00000360656	1.69826	2.06526	1.72649	2.02362	2.36809	2.63886	0.740065	2.49569	2.03324	2.83608	2.01677	3.37376	2.36849	2.27411
ENST00000586226	1.69637	1.7634	2.36044	1.52862	1.08135	1.5344	4.56809	5.12793	2.93213	2.72134	1.75099	4.46818	2.55394	4.00043
ENST00000408966	1.6925	1.62595	1.57675	1.93666	2.73992	1.85896	2.07776	2.07479	1.67231	1.71871	1.54809	1.42434	1.29863	1.11502
ENST00000573167	1.69049	1.08293	1.01279	0.757996	1.25616	1.22656	0.782767	0.685457	0.440452	0.864527	1.18532	0.979637	1.20336	0.933166
TCONS_00388394	1.68315	1.29857	1.52135	1.9216	2.39399	2.75644	2.18644	2.36354	1.75804	2.11378	1.81877	2.79607	2.57103	2.78252
TCONS_00201804	1.67832	1.13027	1.24326	0.58344	0.317465	1.1006	0.017257	1.40182	0.52048	0.723412	0.906791	1.27107	0.807638	0.626227
ENST00000607496	1.67611	1.40706	1.38501	1.22519	1.21656	1.47732	1.30252	1.02456	0.907709	0.934577	0.668307	1.01142	1.05146	0.64955
ENST00000426882	1.67565	0.113678	0.079279	0.60513	0.105013	0.114172	0.026636	0.072934	0.092382	0.074046	0.127259	0.186401	0.070601	0.165014
ENST00000567508	1.67496	0.975765	1.11512	1.88229	2.00285	2.0054	0.883329	0.757254	1.27679	1.55494	1.44675	1.28218	1.15858	1.44389
TCONS_00180440	1.67257	1.90169	2.50094	1.83595	3.02062	2.64364	2.17951	1.79924	0.979658	0.815257	2.17256	2.77915	2.68574	2.0089
ENST00000618041	1.66714	0.494771	0.366859	0.491649	0.567401	0.186476	0.493461	0.313054	0.420001	0.050763	0.250255	0.696608	0.398085	0.375291
TCONS_00153521	1.66558	2.32969	2.92171	2.19311	3.60356	4.65582	4.02488	3.51942	3.05089	2.89766	1.77867	1.74942	1.49212	2.57535
ENST00000502041	1.64306	0.00041	2.3e-05	0.000846	0	0.216781	0.000229	0.421766	0.003581	0.000512	6.5e-05	0	1.1e-05	0
ENST00000526623	1.62931	0.017305	0.001437	0.958859	1.65873	0.182063	3.33784	0.000714	2.27297	2.33599	2.01853	0.473677	1.00348	0.021893
ENST00000603538	1.62369	0.961439	1.15323	1.38652	1.82701	1.76988	3.47457	3.56148	0.02307	2.61766	1.38009	0.326039	0.022856	1.40673
TCONS_00343147	1.6227	1.33016	1.74796	1.79863	2.25417	2.18338	1.25099	1.41298	1.52167	2.26603	1.53207	1.55635	1.47896	1.16424
TCONS_00028515	1.61745	1.44715	0.792262	0.580717	0	1.39169	2.66225	1.8438	1.01388	0.967928	1.3418	1.93041	0	1.21453
ENST00000500370	1.61227	3.65947	3.45139	5.0897	6.98022	3.45287	4.01438	4.18141	3.50177	4.13887	3.23451	3.36545	2.12314	2.74313
TCONS_00226486	1.60634	3.42618	3.30289	2.20937	1.61419	2.09898	2.49299	2.41694	1.99408	1.15495	1.27639	0.779253	1.43071	1.67528
TCONS_00208302	1.60533	1.62599	2.15149	2.15538	2.78187	2.01314	2.17862	2.19229	1.77217	2.60093	0	2.94925	0	2.27819
ENST00000558617	1.60222	0.867435	1.10208	0.02303	1e-06	0	0.010708	0.357978	0.000321	1.66845	1.10472	0.039096	1.25232	0.003216
TCONS_00080244	1.6012	0.076079	0.708692	0.032652	0.929526	0.251091	0.98579	0.904119	0.779256	1.37161	0.156655	0.592898	2.63843	0.160368
ENST00000578214	1.60002	0.529402	0.718457	0.490743	0.783428	0.688443	0.348611	0.645419	1.20351	2.31243	1.98142	0.640436	0.919374	0.490492
ENST00000610979	1.58275	1.81889	1.41067	2.06347	2.61437	2.20392	3.11416	2.5527	1.97478	2.83691	2.2162	2.35954	1.75785	2.34309
TCONS_00145012	1.58142	0.813918	0.687489	0.581929	1.16983	1.42639	2.1786	2.65615	2.01317	2.6046	1.02325	1.20212	0.970567	1.37971
TCONS_00156805	1.57723	1.87106	2.01357	1.86519	2.73557	2.93558	3.56165	2.6806	1.78131	1.95142	2.29229	2.36115	1.5889	1.18297
TCONS_00163236	1.56891	0.362953	0.506873	0.244231	0.439421	0.644219	0.764928	0.77494	0.255018	0.431075	0.57346	0.378881	0.637608	0.462944
TCONS_00395716	1.56147	1.84208	1.7893	1.79892	2.32363	1.97038	2.40637	2.9153	1.781	2.11136	1.43526	1.79485	1.60726	1.52418
ENST00000574180	1.55879	0.298201	0.38424	2.38277	1.8617	1.74678	1.02181	0.983452	0.877806	1.45733	1.83144	2.1846	2.29922	1.53964
ENST00000605778	1.55479	0.002541	0.001213	0.001273	0.002373	0.003341	0.847574	1.07905	0.490957	1.06228	1.01086	0.001178	1.093	0.000676
ENST00000607376	1.53547	1.42493	1.28918	0.810491	1.54655	1.74738	1.6125	2.77804	2.01887	2.75127	2.1433	1.20549	1.34282	1.13621
ENST00000424989	1.53134	0.573231	0.438384	0.266025	0.641258	0.807763	0.332988	0.522215	0.157012	0.316504	0.48629	0.579233	0.497057	0.688131
ENST00000616184	1.53014	0.392534	0.406679	0.448153	0.295986	0.307953	0.296709	0.373082	0.248545	0.494213	0.550275	0.283726	0.532278	0.243613
ENST00000522525	1.52909	0.50521	1.03981	0.411349	2.58568	2.01901	1.37337	1.14935	0.425544	0.917911	1.08626	0.937967	0.608529	1.59476
ENST00000565390	1.52804	0.497328	0.47707	0.41686	0.45251	0.658527	0.440668	0.594571	0.483122	0.481285	0.415768	0.421675	0.514498	0.269958
ENST00000534517	1.52802	0.401856	0.526221	0.899987	0.448384	0.767187	1.55362	1.54265	1.00707	1.23412	1.49999	0.941854	1.70158	0.70266
ENST00000539897	1.52509	1.03068	1.68684	1.64187	1.55909	1.0786	1.71621	1.89651	0.836735	1.74507	1.82831	1.78299	1.96824	0.796759
ENST00000646865	1.52487	0.638027	0.946945	1.01171	0.812375	1.26912	1.26198	1.47601	0.636464	0.629727	0.994265	1.02805	0.869006	0.843549
TCONS_00009023	1.51491	1.57024	1.43864	0.750394	1.31706	1.82822	1.63388	0.813458	0.373809	0.377342	0.667768	1.6178	1.48187	1.88151
TCONS_00056571	1.50364	0.411718	0.385138	0.562517	0.127589	0.449037	0.645837	1.4329	0.392067	0.973308	0.804658	0.442231	0.278591	0.649307
ENST00000534914	1.49252	1.81465	1.58376	1.6313	1.44665	1.00743	2.33106	2.42544	1.59518	1.15197	1.42227	1.18172	1.53234	1.0353
ENST00000607978	1.49093	0.547773	0.669409	0.784573	0.02318	0.806336	1.10697	1.51646	1.57386	1.22983	1.02693	0.813426	0.848172	0.651547
ENST00000570843	1.48542	3.89688	2.73577	2.59782	1.89627	2.37257	4.20283	5.08528	3.05375	2.02425	1.5045	2.50291	2.60371	2.07823
ENST00000424751	1.4854	1.2212	1.66055	0.101561	1.51981	1.40778	1.76685	1.71627	1.61919	2.25088	2.42521	1.57837	1.32697	1.16895
ENST00000530248	1.48043	1.00446	1.08482	0.921341	0.943765	1.11956	0.733184	0.720328	0.402534	0.806369	0.993647	1.11971	1.3029	0.99917
TCONS_00252780	1.48006	2.93546	2.52379	2.35665	0.019215	1.36503	2.17944	2.84703	0.694555	1.96876	1.54662	1.024	3.18032	2.22227
ENST00000616815	1.44929	0.944556	1.29913	1.43091	1.51509	0.840105	0.561406	0.362957	0.690135	1.55049	1.37285	1.33022	1.48997	0.926562
TCONS_00105573	1.44514	1.52369	0.902265	0.719347	0.453719	0.647494	0.528475	0.500911	0.154464	0.598808	0.354117	0.63096	0.900766	0.397657
ENST00000608444	1.43199	2.40009	2.98517	2.14106	3.92631	2.72913	2.00846	1.3371	0.967396	1.70888	1.93573	2.62637	1.9575	1.35461
TCONS_00219919	1.4255	2.97692	2.76316	3.30494	4.41775	3.13199	4.17191	4.28818	3.55347	2.59171	1.97902	2.31618	1.55952	2.22845
TCONS_00269720	1.42262	0.12951	1.08982	0.866901	0.052558	0.48158	0.408723	0.654916	1.39673	0.048089	0.285529	0.24348	1.42875	1.19794
ENST00000447221	1.41994	1.48603	2.79196	4.7045	2.44893	2.32385	2.43697	2.6759	2.15374	2.52574	1.39515	2.03341	1.6137	1.53214
ENST00000418372	1.41861	3.34238	2.16223	1.76357	0.909969	1.11539	3.30614	3.46929	3.34393	1.05894	0.625956	1.95479	1.56655	2.30938
ENST00000621046	1.41717	0.809994	1.07637	1.05678	1.54012	1.00229	0.704603	0.649185	0.509421	0.649407	1.12451	1.02852	1.09254	0.656049
ENST00000413670	1.41687	1.28507	1.04214	0.595176	0.642897	0.91356	0.783723	1.3953	0.763452	0.882756	1.03214	1.04581	0.480162	0.645711
ENST00000609190	1.41048	0.309835	0.354645	0.599107	0.292972	0.11521	0.686786	1.5488	1.22761	1.8341	0.925236	0.349978	0.218953	0.163577
TCONS_00000803	1.40263	0	0	0	0	0	0	0	0	0	0.009799	0	31.8507	0
TCONS_00297644	1.38745	4.07795	3.60777	1.67346	0.806434	1.13999	2.62434	1.35844	0.244429	0.464157	0.19904	4.17207	1.61508	3.67048
ENST00000530270	1.38613	0.556648	0.650196	0.897984	0.393233	0.933536	0.395579	0.431988	0.226608	0.446295	0.661834	0.506277	0.810295	0.423445
TCONS_00323737	1.37972	0.096914	0.065183	0.080532	1.02791	0.08873	0.110375	0.044633	0.064175	0.535909	0.851421	0.078127	0.091826	0.114065
TCONS_00004667	1.37834	1.42796	0.871698	2.3659	2.00827	1.68625	1.53053	2.33669	2.36525	1.65318	2.01503	1.34195	0.961731	1.58404
ENST00000551421	1.37574	3.06725	2.80117	3.77438	3.08417	3.06123	2.25439	2.1524	2.10597	1.3547	1.79679	2.28371	2.59134	2.87149
ENST00000596206	1.36997	1.15658	1.42913	2.34042	2.35982	2.5005	1.68832	1.61385	1.77001	1.75687	1.60212	1.29791	1.23539	1.4928
TCONS_00114697	1.36797	0	0	0	0.15842	0	0	0	0	0	0.002895	0	0	0
ENST00000478845	1.36708	1.51324	1.35727	1.44759	0.575532	0.793315	0.916384	1.07616	0.568397	0.814741	1.11249	0.702248	0.638126	0.723511
ENST00000565797	1.3639	1.1663	1.446	2.82362	3.19347	1.63889	3.32304	4.28477	4.93486	5.07769	2.23835	1.80756	1.13063	1.26494
ENST00000557223	1.36231	0.446465	0.838498	0.845681	0.906147	1.01663	0.923047	0.835764	0.641044	0.601985	1.05258	0.809289	0.796431	0.634073
ENST00000614284	1.35598	0.027675	0.03223	1.26035	0.034817	0.023989	0.045664	0.035048	0.022441	0.036122	0.028278	0.046734	0.030496	0.022913
TCONS_00238720	1.35344	1.94088	0.608421	2.78797	1.4304	1.48008	2.78578	1.9315	1.84841	2.4753	0.017472	3.07326	1.53762	0.802298
ENST00000560049	1.35105	0.062202	1.00157	0.016084	2.43881	0.027759	0.238758	0.00152	0.236854	2.28152	0.21773	0.074882	0.327521	0.200705
ENST00000601484	1.34612	0.839311	0.782925	1.14303	1.50051	1.30071	1.88406	3.10259	1.92093	1.50202	0.623584	0.67023	0.905583	0.583025
ENST00000448513	1.34597	2.76099	3.03649	2.41739	1.74873	3.08326	4.01314	3.5283	2.80245	2.2333	3.0935	4.22614	1.74636	2.93113
TCONS_00320651	1.33998	1.55978	1.2399	1.52404	2.29672	2.4852	1.77077	1.2523	0.82157	1.01072	1.47782	1.32959	1.57339	1.33864
ENST00000592117	1.33308	0.541376	1.05644	0.645557	1.04099	0.868857	1.01593	0.886968	0.907514	2.20791	1.58056	0.828946	1.0957	0.570628
TCONS_00067584	1.32723	0.893487	0.95502	0.579302	0.394713	0.276357	0.363266	0.510932	0.283533	0.296399	0.380093	0.357618	0.690877	0.352001
ENST00000620414	1.32447	0.863512	0.766233	0.710459	0.967508	0.610162	0.485791	0.737703	1.09066	1.57527	1.17252	0.515062	0.640478	0.334836
ENST00000650334	1.3217	0.884298	0.833993	0.523749	0.844992	0.977487	1.4339	0.668278	0.498824	0.73473	0.903012	1.08785	1.06062	0.665404
ENST00000564352	1.31875	0.243757	0.382356	0.358495	0.289628	0.496512	0.355131	0.240867	0.074962	0.064415	0.140493	0.338446	0.396889	0.281854
ENST00000605085	1.31672	0.977609	1.26104	0.013095	0.005578	0.001995	0.000146	0.016205	0.002232	0.024085	0.015926	0.025449	0.045132	0.001863
ENST00000444126	1.31634	0.162168	0.366489	0.175853	1.17588	0.161865	0.016086	0.206576	0.027996	1.20153	2.15993	2.4386	2.26035	0
ENST00000607794	1.31438	0.196112	0.226164	0.187586	0.238794	0.163849	0.440546	0.629719	0.22241	0.295652	0.198022	0.158097	0.20914	0.085771
ENST00000417897	1.31417	3.28604	2.29818	2.66075	2.92869	4.48589	4.74565	3.81364	4.0765	3.81042	2.22298	2.82584	1.69301	1.89299
TCONS_00161082	1.30961	1.2828	1.53552	0.91952	2.38252	2.83097	2.62435	2.82158	2.40699	1.63314	1.91898	1.2594	1.99428	1.35935
TCONS_00159189	1.30304	0.032381	0.002206	0.006521	0.008968	0.019807	0.229293	0.713891	0.390533	0.012624	0.401945	0.039655	0.001889	0.019397
ENST00000432268	1.30197	0.639803	0.809704	1.27409	1.05404	1.50669	1.17954	1.29193	0.633507	0.771157	1.11541	1.06354	1.09732	1.02199
TCONS_00388834	1.29741	1.14883	1.89781	1.26459	2.00503	2.0637	0.984346	1.70201	0.937036	2.24556	2.068	1.47569	0.921966	1.50526
TCONS_00047952	1.29588	0.85763	1.75918	1.28204	0.018765	0.022654	0.501799	0.004011	0.007461	0.143925	0.790731	1.34301	1.52678	1.10404
TCONS_00127928	1.28326	0.549571	0.542051	0.56244	0.595421	0.523846	0.63263	0.496245	0.318191	0.358822	0.566842	0.505681	0.54266	0.497003
ENST00000547963	1.28233	0.381836	0.9872	1.7273	0.738947	0.990565	0.691202	0.923048	1.74922	2.30652	1.50436	1.4738	1.08225	1.20623
TCONS_00009835	1.27477	2.21083	3.14979	2.86853	3.04319	3.92489	3.60989	3.69028	1.40301	1.9824	2.27366	2.71329	2.55867	1.992
ENST00000623971	1.27341	1.24044	1.07256	1.01452	1.31786	1.19897	0.657636	0.793811	0.267837	0.338985	1.5937	1.3849	1.46548	2.9779
TCONS_00050082	1.2732	0.468488	0.640059	0.566225	0.334337	0.517913	0.580724	0.822512	0.440261	0.401292	0.301852	0.361668	0.506356	0.398648
ENST00000606853	1.26702	1.24914	0.862337	0.796554	1.72909	1.38728	1.87421	1.15615	1.4121	0.770186	0.875516	1.43525	1.7186	1.53996
ENST00000452565	1.2629	1.11768	1.04481	1.11794	1.20928	1.35807	1.84909	1.09424	1.06292	1.00687	1.10536	2.47008	2.55932	2.65303
TCONS_00058174	1.25782	1.64502	0	1.68365	0	0	0.671247	0	0.819375	2.25065	0	0	0	0
TCONS_00274924	1.25701	2.77474	2.42434	2.03778	4.15976	4.21024	5.40961	4.87428	3.85664	3.03548	2.32018	3.14526	2.4714	3.16098
TCONS_00037712	1.25565	0.113157	0.02005	0.017564	0.011081	0.024804	0.805972	0.126415	0.372885	0.049787	0.085152	0.89716	1.00421	0.013585
ENST00000602507	1.25372	0.732926	0.824374	0.803131	0.433097	0.879088	0.567747	0.72377	0.402029	0.348864	0.981691	0.703896	0.746274	0.901533
ENST00000467666	1.2473	1.04674	1.03264	0.721635	0.652886	0.825301	1.43073	2.49392	0.967319	0.80012	0.926059	0.490132	0.743216	0.654843
TCONS_00328895	1.24006	1.16067	1.03973	1.62231	1.37959	1.47805	2.03664	1.73645	1.68279	1.106	0.825205	1.45131	1.48829	1.4159
TCONS_00069160	1.23319	3.20789	0	0.000596	2.46692	2.45472	3.85807	2.86634	1.6035	0	2.13099	2.32242	0.002191	3.30545
TCONS_00258450	1.2312	1.23837	1.40197	1.89906	3.24948	3.868	2.6472	1.58218	1.19869	0	1.2625	0.004084	0.00275	1.00374
TCONS_00058345	1.23099	1.6399	1.4164	2.0672	2.49197	1.53851	3.13244	4.13911	3.25807	3.15766	1.25812	1.0981	1.0716	1.10193
ENST00000420367	1.22333	0.8789	1.26958	1.07814	1.04731	1.25523	1.56336	1.52583	1.53754	1.77113	1.31551	2.14571	1.7226	1.81127
ENST00000478294	1.22131	0.463328	0.827468	0.616256	0.587986	0.693434	1.01576	0.563782	0.701573	0.39524	0.576788	0.617953	1.11362	0.647327
ENST00000460022	1.20091	1.02643	1.13158	1.19397	1.14377	1.27994	1.77252	1.35331	0.587967	1.2247	2.01652	2.2298	1.59333	1.42244
ENST00000606054	1.19979	1.68166	1.18449	1.21236	1.74559	2.40475	3.26636	4.32071	3.16452	3.46941	1.61763	1.73441	0.852878	1.72594
ENST00000607315	1.19701	1.46994	1.03932	1.12886	2.08697	2.15255	2.55633	3.13781	2.44652	3.02198	1.78308	0.759949	0.885443	1.46945
TCONS_00039330	1.19575	0.551736	0.861156	0.524114	0.478222	0.597095	0.431976	0.14956	0.113946	0.486066	0.574632	0.519807	0	0.401217
ENST00000527986	1.18673	0.39915	1.38567	0.470672	0.082117	0.49499	0.328666	0.716585	0.502921	0.152626	1.37054	0.913073	0.743622	0.882542
ENST00000555043	1.18121	1.57758	2.58486	2.62338	2.99156	3.12149	2.19161	2.79615	2.4911	2.19525	1.51715	1.77689	1.79163	1.44568
ENST00000614061	1.17754	0.354867	0.866726	0.669335	0.5217	0.488659	0.336813	0.376315	0.463266	0.684606	0.542703	0.577205	0.475191	0.413003
TCONS_00262766	1.17371	0.328901	0.342901	0.501864	0.526344	0.681175	0.646703	0.566276	0.217739	0.455084	0.395511	0.773678	0.851488	0.345774
TCONS_00326714	1.1729	0.95257	1.0454	0.730177	0.918421	1.2077	2.06848	1.194	0.734166	0.798847	0.878536	0.776931	1.61261	1.02568
ENST00000555562	1.16414	1.48702	1.62107	1.80907	2.1506	2.08513	1.90052	1.79576	1.46145	1.73117	3.36021	3.27888	2.67008	1.53057
TCONS_00340900	1.16028	1.37826	2.02164	1.33062	1.18439	1.40203	1.12786	0.988324	0.773287	2.23036	1.20047	1.55092	1.40789	1.67259
TCONS_00253002	1.16008	1.11322	1.13437	0.937018	1.74018	1.87802	1.64927	1.44848	0.995597	0.963048	1.25014	1.24006	1.31156	1.404
ENST00000613646	1.15923	0.3994	0.594663	0.8334	0.864772	1.03828	0.732663	0.759206	0.696712	0.653273	0.99093	0.79978	0.61275	0.833737
ENST00000550223	1.15908	0.996986	2.53697	1.56401	1.97249	2.40351	0.652943	0.794769	1.61842	2.1638	1.23044	2.95307	2.78119	2.40174
ENST00000426037	1.15725	1.01173	1.06611	1.06378	1.01665	0.877772	1.26325	1.49713	1.0534	0.940716	1.19429	1.2182	0.986763	0.619256
TCONS_00256700	1.15547	0.948454	1.48324	1.48297	1.99009	2.30754	1.60111	0.936004	0.707321	0.932166	1.03592	1.96712	1.46489	2.14384
TCONS_00082027	1.15516	1.60315	1.0823	1.42294	1.20512	1.69378	0.917913	2.75867	2.67634	2.88761	2.69524	2.6542	1.44685	1.35288
ENST00000591313	1.15285	1.48835	0.655015	0.647486	0.381546	1.12454	1.32401	1.41252	0.563032	1.01096	0.612159	1.85885	0.541583	1.73671
TCONS_00335600	1.1457	0.465091	0.649783	0.335753	0.685393	0.823327	1.24621	1.51511	1.36607	1.37225	0.465642	0.604353	0.420159	0.698745
ENST00000618557	1.13689	0.658162	0.486965	0.043418	0.453924	0.588494	1.36911	1.36816	0.822679	0.791446	0.83614	0.938111	0.706571	0.575126
ENST00000418837	1.13648	1.14716	0.90869	0.672132	0.933608	1.06861	1.13587	0.583291	0.324558	0.355796	0.611161	2.01913	1.39805	2.20926
TCONS_00171639	1.12992	1.08091	1.61598	1.14571	1.83324	2.12308	1.39647	1.21435	0.826328	0.801707	1.27134	1.10374	1.00604	1.20152
ENST00000623190	1.12929	0.485466	0	1.82301	0	1.65163	0.691577	1.35511	1.83933	0	0	0	1.86793	0.55726
ENST00000564834	1.12419	0.775433	0.595365	1.24347	1.72743	1.27375	3.90487	3.44869	2.69584	1.73107	0.969953	1.08259	1.04799	0.909593
ENST00000496975	1.11993	1.28655	4.48491	12.8399	4.22586	9.07906	0.999558	0.93175	1.09322	1.11432	2.2226	2.12886	2.77976	3.93726
TCONS_00197314	1.11472	0.625838	0.751839	0.604145	1.14854	1.29945	1.35693	1.62674	1.09386	1.063	1.33127	1.23606	1.53148	0.672413
ENST00000617667	1.11421	1.28278	0.765717	0.857625	0.80194	1.05371	0.82389	0.439191	0.394321	0.713939	1.73785	0.885912	0.842134	1.3721
ENST00000585877	1.11216	1.02674	1.44187	1.5339	1.10651	1.15577	1.02036	0.857127	1.04739	1.58374	1.46697	0.979125	1.55641	1.00429
TCONS_00020417	1.1102	0.926818	1.13416	0.976922	1.00099	1.47021	0.658272	0.633251	0.850281	0.517144	1.27538	1.10311	1.00849	0.805597
TCONS_00104356	1.10727	1.11931	1.27063	0.801814	1.17438	1.00737	0.919557	1.00913	0.7524	1.10013	0.988949	1.07822	0.964854	1.1889
TCONS_00004922	1.10455	0.839927	1.15874	0.981131	1.16256	1.32554	1.06304	1.02	0.524384	0.698638	0.850143	0.662149	0.919733	0.767536
TCONS_00329057	1.10436	0.582534	1.13634	0.825422	1.04949	1.20894	1.15297	1.11931	0.477081	0.652775	0.705796	1.08804	1.36328	0.791773
ENST00000446751	1.10193	0.402011	0.708369	0.644573	0.646717	0.560391	0.346202	0.315152	0.115199	0.451353	0.573074	0.605985	0.580696	0.388313
ENST00000457157	1.10037	1.76926	0.699369	1.26589	1.51138	0.646366	0.27357	2.08064	1.55016	0.680251	1.27185	1.65861	1.66382	1.96537
ENST00000602172	1.09895	1.1639	1.53058	1.3385	1.01296	0.886871	1.27488	1.31329	2.66585	3.61209	1.96322	1.61342	1.67243	0.771538
ENST00000448869	1.09753	0.183266	0.281859	0.129683	0.077984	0.261812	0.225108	0.312212	0.133659	0.309274	0.603509	1.10825	1.01892	0.744291
ENST00000503152	1.09359	1.14945	1.23945	1.4885	1.21517	2.46672	1.38594	1.54534	1.01837	0.445482	1.00357	1.73581	1.21811	1.43757
TCONS_00051216	1.08485	0.692424	1.15323	0.67576	1.21134	1.30769	1.08084	1.14866	0.903066	0.749212	0.952144	0.856686	0.934734	1.04537
ENST00000565978	1.08213	0.697603	0.610414	0.496209	0.013835	0.849927	0.891958	0.863625	0.700969	0.826231	0.46932	0.02117	0.032666	0.375451
TCONS_00328896	1.08163	1.57822	1.52955	2.01386	1.76013	2.1682	2.02901	1.5673	1.14192	1.16344	1.16184	2.35073	1.3849	1.69629
ENST00000606496	1.08098	1.67406	1.75498	1.10903	1.4799	2.38197	2.26686	2.33469	2.17259	1.34159	0.706686	1.72087	1.26921	2.60127
ENST00000617916	1.07617	0.280912	0.43584	0.246156	0.188424	0.128274	0.414357	0.963006	0.680281	0.45739	0.316368	0.374135	0.441133	0.253778
ENST00000586962	1.07161	0.483109	0.337337	0.843766	0.807681	0.743671	1.08323	0.357583	0.227066	0.314828	0.417974	0.823424	0.427673	0.786389
ENST00000588798	1.06226	0.173217	0.175729	0.148383	0.212794	0.383741	0.411556	0.988945	0.492804	0.657806	0.513548	0.862215	0.638167	0.612479
TCONS_00149312	1.05732	1.90963	1.60091	2.04762	2.50215	1.48188	3.8806	4.5638	2.36528	0.882975	1.88002	1.38497	2.01236	1.29425
ENST00000418945	1.05215	0.619245	0.596149	1.07728	1.0895	0.872078	0.523278	0.489	0.493934	0.921856	0.971761	0.825599	0.657403	0.722893
TCONS_00261491	1.04877	0.974739	1.24195	1.05384	1.43972	1.35403	1.11505	1.08195	0.297971	0.824399	1.0981	0.946173	1.00452	0.884126
ENST00000560865	1.04699	0.16686	0.242041	0.178735	0.103007	0.18128	0.125256	0.145747	0.061937	0.024447	0.22486	0.251841	0.262284	0.181923
ENST00000426991	1.04434	0.480219	0.435837	0.840549	0.421935	0.883425	0.019495	0.298159	0.241526	0.181732	0.578594	0.648811	0.502615	0.890495
ENST00000566733	1.04351	0.737609	0.579729	0.390382	0.806061	0.464303	0.349636	0.260439	0.061021	0.27752	0.536446	0.352167	0.733124	0.392892
ENST00000582965	1.04048	0.317694	0.27906	0.27253	0.209033	0.825051	0.172674	0.188384	3.53183	1.21719	1.8033	0.154837	0.153444	0.244233
TCONS_00062944	1.03903	0.719995	0.815158	0.661334	1.49372	1.48625	0.634397	1.11785	1.41531	1.42329	1.33093	1.20465	1.08902	0.924803
ENST00000600805	1.03792	0.012099	0.01335	0.031037	0.020819	0.743961	0.618066	0.690384	0.320694	0.482103	0.528538	0.866236	0.003687	0.001899
TCONS_00408768	1.03348	0.605598	1.33153	1.22742	0.860619	0	0.733695	0.843637	1.09707	0.567347	1.3805	0.937857	1.15271	1.15865
ENST00000445430	1.0313	0.533032	0.917769	1.97662	1.13535	1.15351	0.383292	0.867265	0.575103	0.869199	0.989532	0.823107	0.848275	0.740728
ENST00000605920	1.0206	1.56035	1.29193	1.6823	2.50824	1.66284	2.83362	3.36282	3.25717	3.76361	1.65636	1.56852	1.31726	0.895254
ENST00000572035	1.01701	1.61784	0.483911	0.797342	1.36525	1.59654	1.67614	1.49363	0.856005	0.612995	0.81588	1.36613	0.742957	1.59122
ENST00000610917	1.01508	0.464849	0.672233	0.777749	0.538419	0.461646	0.442089	0.44406	0.330277	0.312448	0.323913	0.299351	0.531704	0.155499
ENST00000610128	1.01167	0.247174	0.282179	0.269323	0.197896	0.22432	0.380591	0.486835	0.233677	0.222514	0.195748	0.160754	0.258052	0.129359
ENST00000622688	1.01143	0.335312	0.507845	0.409435	0.17942	0.22978	0.162937	0.120837	0.158991	0.123921	0.342777	0.275477	0.427822	0.327029
ENST00000609609	1.01039	0.520973	0.5947	0.681352	0.545651	0.517119	0.450333	0.641521	0.249645	0.385953	0.2958	0.289922	0.340976	0.245955
TCONS_00357687	1.0072	1.07532	1.09164	0.974974	1.17202	1.01401	0.967404	0.725575	0.661781	0	0.908196	0.985142	0	0.367056
ENST00000415124	1.00513	2.40665	1.67515	1.99444	1.65423	2.42211	3.33854	2.89858	2.19202	2.94023	1.65607	1.59542	0.774456	1.27727
ENST00000455788	1.00401	0.490446	0.589478	0.458151	0.659761	0	0.805513	0	0.497558	0.670358	0.668664	0.533483	0.677519	0.413386
TCONS_00335137	1.00332	2.69419	1.60865	3.08508	2.01661	1.98565	1.33113	1.49312	1.00294	0.460386	0.756888	1.67187	2.29024	0.714176
TCONS_00153452	1.00097	0.563359	0.827095	0.641714	1.30732	1.02505	0.946978	0.975937	1.14272	1.31671	1.14297	1.0747	1.01313	0.753909
ENST00000567257	0.995104	0.042126	0.030992	0	0.019335	0	0.696608	0.436595	0	0.005324	0.00698	0	0	0
ENST00000607786	0.984204	0.403237	0.468485	0.505307	0.526706	0.369585	0.23727	0.25571	0.117494	0.016511	0.235403	0.179176	0.438701	0.223158
ENST00000602977	0.97703	0.598252	0.484977	0.350995	0.3891	0.819178	0.863864	0.609529	0.601771	0.919461	0.518792	1.32603	1.09159	1.02562
ENST00000455503	0.976331	1.81815	1.67241	1.53145	1.71212	0.876724	2.07557	1.97516	1.33396	1.33327	1.49458	1.67394	0.597336	1.23104
ENST00000607068	0.974311	0.288571	0.150809	0.426627	0.351855	0.350939	0.382521	0.532875	0.261746	0.57661	0.4499	0.271013	0.483856	0.075056
ENST00000563286	0.97378	0.288009	0.464586	0.330202	0.265069	0.29252	0.248282	0.238104	0.200317	0.365714	0.301513	0.279171	0.379799	0.205228
TCONS_00074910	0.969597	0.724062	0.811827	0.59203	0.921135	0.531876	1.0027	1.33083	1.07599	1.38494	0.82912	0.731015	0.791693	0.328137
ENST00000440665	0.965663	0	0.290752	0.048365	0	0	0.040296	0	0.024903	0.012944	0.20188	0	0	0
TCONS_00397852	0.965148	1.05844	0.232536	1.24197	1.50289	1.35441	2.98405	4.42068	4.02133	3.40961	1.35642	1.09074	0.842746	0.775833
ENST00000564152	0.961337	0.072996	1.12306	0.001594	3.75545	2.84078	0.002377	0.000606	2.72014	3.24139	2.39676	0.01024	1.91643	1.88841
ENST00000602615	0.959502	0.316604	0.475609	0.578744	0.534114	0.306688	0.343266	0.347524	0.16616	0.134526	0.264333	0.185742	0.27416	0.14192
TCONS_00162733	0.957876	0	1.04439	0.977158	1.99143	0.193223	0	0.179595	0.709678	0.926332	0.23344	0.171909	0.39116	1.016
TCONS_00226670	0.953461	0.51911	0.608279	0.615356	0.546749	0.465209	0.45391	0.355212	0.096893	0.225671	0.679341	0.604128	0.341336	0.430421
ENST00000570096	0.95086	2.56201	1.77224	1.03624	1.10881	1.91116	2.01573	2.28401	2.41467	2.44988	0.916623	1.01556	0.748556	0.597974
ENST00000444114	0.949709	2.10029	2.10432	1.41143	0.968147	2.23338	1.44149	1.54233	1.11862	0.717216	0.673567	1.03339	0.888969	0.729437
TCONS_00357452	0.94642	0.370532	0.230297	0.356406	0.412509	0.48035	0.941247	0.85608	0.94081	1.11433	0.800364	0.446281	0.290967	1.12884
ENST00000593791	0.944701	0.827715	1.04014	0.754262	1.28916	1.0477	1.66071	1.22276	0.719256	1.06087	1.07319	1.18843	0.911836	0.868212
ENST00000585832	0.944278	0.639924	0.718719	0.6239	0.832762	0.34562	1.152	2.2817	3.01045	3.54172	2.05715	0.823493	0.938252	0.173484
ENST00000593581	0.943066	1.42461	1.17506	0.885022	1.28511	1.04032	1.62111	1.55712	1.84232	2.8998	1.921	1.97167	1.46914	1.35002
TCONS_00003465	0.941795	0.315566	0.541366	0.824556	0.442639	0.625011	0.698831	1.14905	0.219365	0.434783	0.706373	0.950619	0.975001	0.677936
TCONS_00061178	0.941272	0.639809	0.067289	0.135549	1.22999	0.022076	0.179259	0.012846	0.009175	0.027341	0.142286	0.173713	0.094092	0.010802
TCONS_00008797	0.939149	1.79083	2.06083	1.63756	1.51638	0.676674	1.61422	1.29695	1.05367	1.37936	1.47233	0.757693	0.918529	0.573903
ENST00000602458	0.933126	0.223185	0.381291	0.330036	0.345554	0.376736	0.408407	0.25729	0.194838	0.302906	0.360294	0.353477	0.474292	0.339703
ENST00000607014	0.931813	0.349549	0.73621	0.518706	0.366417	0.516854	0.457329	0.884457	0.594263	1.00109	0.699646	0.514321	0.799054	0.268
TCONS_00323366	0.931501	0.633519	0.628458	0.628595	0.994138	0.701534	0.565396	0.554908	0.259218	0.521366	0.896489	0.699227	0.692245	0.818492
TCONS_00020430	0.929869	1.00156	1.01837	1.14891	1.48555	1.06797	1.26095	1.08378	0.896036	1.19428	1.02267	0.960784	0.722412	1.00978
ENST00000325042	0.927443	1.35103	0.576294	0.175776	0.507153	0.390026	0.902657	0.934168	0.590261	0.549142	0.577473	0.736342	0.742305	0.1183
ENST00000620075	0.924075	0.249007	0.433372	0.602805	0.528283	0.483277	0.601593	0.67032	0.332744	0.329755	0.314043	0.291103	0.508301	0.224619
TCONS_00022269	0.922584	0.701869	0.850532	0.719757	1.27197	1.08645	1.30567	1.06866	0.486465	0.561385	0.865956	0.894855	1.0417	0.992528
TCONS_00318683	0.92221	1.10512	1.4496	1.08835	1.62265	1.48397	1.36228	1.5304	1.80352	2.30365	1.44342	1.34363	1.11519	1.50092
ENST00000621354	0.922093	0.637573	0.694129	0.633131	0.570798	0.525338	0.395991	0.508355	0.248565	0.227851	0.316011	0.410695	0.261979	0.574785
ENST00000602596	0.919239	0.650857	0.639245	0.444529	0.73293	0.774508	0.823023	0.479311	0.111096	0.493072	0.833085	0.628126	0.94685	0.643699
TCONS_00306346	0.91747	1.5044	1.53789	2.29368	1.70583	2.05796	2.45168	1.7815	2.46571	3.97909	2.22301	1.47465	1.68339	0.623513
ENST00000645257	0.916796	0.250962	0.239597	0.369434	0.116532	0.411784	1.02639	0.789976	0.637108	0.582056	0.566267	0.652842	0.398985	0.602099
TCONS_00285801	0.916004	0.398581	0.715213	0.670288	1.08457	0.687959	0.656117	0.711183	0.380342	0.653593	1.31729	0.981958	0.763874	0.30495
ENST00000413221	0.91423	0.303266	0.450012	0.249878	0.295666	0.429729	0.321785	0.405982	0.758205	0.276877	0.786026	0.544449	0.53219	0.821312
ENST00000576302	0.914216	0.382383	0.689307	0.461639	0.942827	0.811277	0.675126	0.673552	0.33124	0.562964	0.559905	0.637002	0.736989	0.534051
ENST00000484794	0.912898	0.8011	0.542506	0.454208	0.32121	0.318038	0.278228	0.350857	0.201452	0.442121	0.295951	0.160584	0.250687	0.143972
ENST00000619744	0.908992	1.40675	0.397526	0.574266	0.643071	0.336458	1.08325	0.993401	0.619704	0.785993	1.02145	0.650475	0.474912	0.382624
ENST00000595302	0.908303	0.621881	0.078055	0.114492	0.704686	0.083458	0.468759	0.137218	0.933125	0.129412	0.811394	0.79373	0.878611	0.486342
ENST00000556072	0.90733	0.257139	0.419765	0.464917	0.443085	0.509192	0.370209	0.504311	0.466704	0.70456	0.413269	0.433281	0.628755	0.395595
ENST00000611026	0.904135	0.457274	0.61041	0.712059	0.67902	0.412744	0.675395	0	0.733309	0.653835	1.02096	0.731412	0.713254	0.210966
ENST00000609958	0.903611	0.891718	1.38735	2.04353	1.4551	0.827844	0.53664	0.678355	0.88031	1.42243	1.48637	0.777228	0.96651	0.440043
ENST00000527789	0.902821	1.85581	1.91388	1.58316	2.16783	2.38875	2.65146	4.06989	2.79993	2.37788	2.11478	2.1847	1.68644	1.17664
TCONS_00000482	0.901582	0.247343	0.455881	0.426719	0	0.126793	0.127002	0.090913	0.096544	0	0	0.117633	0.135901	0.234534
ENST00000593393	0.90027	0.33714	0.449524	0.598006	0.732157	0.736834	0.539584	0.434956	0.283453	0.811371	0.887582	0.85972	0.829305	0.317166
TCONS_00021442	0.898694	0.241607	0.439474	0.325172	0.472646	0.307012	0.327208	0.354191	0.283933	0.47147	0.703308	0.434645	0.846733	0.409927
TCONS_00061177	0.897829	0.034829	0.42344	0	0.017159	0	0.489372	0	0	1.73219	0	0.015047	0.076652	0
TCONS_00378693	0.897227	1.0137	0	1.02855	1.1794	0.031219	0	0	0	0.671508	1.29853	1.12793	0.94184	0
TCONS_00018702	0.895516	1.03349	1.26343	0.898861	1.35359	1.31894	2.12842	2.0136	1.87829	2.12148	1.53233	0.760055	0.823807	0.965022
TCONS_00351298	0.893683	1.63114	1.43808	1.64838	0.967642	1.47393	1.86575	0.942475	1.06926	0.560362	0.829977	1.03209	1.17541	0.727331
ENST00000359941	0.892712	1.18312	0.7572	0.936943	1.06395	1.21827	1.46467	1.1747	0.86805	0.557946	1.78625	3.08996	2.45134	3.09186
ENST00000616952	0.892644	1.08062	0.89061	0.799854	0.924518	1.6983	1.15695	1.16136	1.30662	0.883471	1.18922	1.79177	1.44665	1.56497
TCONS_00121040	0.892194	3.32923	3.23616	4.29931	3.05072	0.973913	0.928335	1.34623	0.50614	0.928822	1.23584	2.52549	1.98357	2.20098
ENST00000490375	0.890919	0.703664	0.877853	1.30666	0.861121	1.21244	0.701692	0.805214	0.669754	0.591515	0.742788	0.71377	0.711948	0.819611
ENST00000609924	0.887978	0.501535	0.385029	0.59391	0.623173	0.739613	1.08866	0.822288	0.673218	0.88096	0.569074	0.628359	0.429784	0.55014
ENST00000520885	0.886786	0.384254	0.385787	0.320495	0.592142	0.034671	0.405516	0.256563	0.256312	0.302801	0.462951	0.907719	0.608558	1.38088
ENST00000420471	0.885623	0.200984	0.128833	0.140972	0.417711	0.057046	0.036658	0.012306	0.172561	0.124947	0.095287	0.124582	0.588338	0.062445
ENST00000620106	0.884407	0.315566	0.536593	0.521155	0.278051	0.32716	0.229297	0.34206	0.346195	0.204348	0.228142	0.179536	0.186096	0.139073
ENST00000552576	0.882822	0.033572	0.095789	0.141882	0.307167	0.050963	0.329863	0.085172	0.024111	0.277864	0.270009	0.24461	0.314698	0.67073
ENST00000565283	0.882221	0.946832	1.37282	1.09175	0.707862	0.896438	0.712939	1.29327	1.14304	0.617859	0.53158	0.486667	0.621723	1.58884
ENST00000445681	0.881022	0.953371	0.751392	0.973287	1.37262	1.42559	1.79677	1.44194	0.927951	1.20483	0.833345	3.09856	1.99798	2.90122
ENST00000625168	0.880835	1.04104	1.13024	1.22663	0.902382	1.19506	1.29327	1.65686	1.2889	1.20097	1.20496	1.59887	1.62065	1.08767
ENST00000604052	0.88066	0.10588	0.133566	0.553962	0.332169	0.272786	0.065674	0.442789	0.055299	0.02462	0.28265	0.117046	0.098286	0.266454
ENST00000435388	0.878506	1.1019	0.759205	0.745915	0.921798	0.829195	1.09342	1.39496	1.01998	1.09559	1.04351	1.11647	0.721425	0.11619
ENST00000642133	0.877716	1.94002	1.54854	0	1.07187	1.53687	1.87959	1.84298	1.39882	0.899951	0.122843	1.21281	1.57855	1.43964
TCONS_00076045	0.876019	0.598665	0.680749	0.394579	0.789517	0.664769	0.387901	0.504076	0.52062	0.623724	0.911911	0.384244	0.901835	0.762237
ENST00000529938	0.875879	0.617594	0.558937	0.782054	0.756939	1.13646	0.783511	0.293867	0.339262	0.491909	0.587693	0.223888	0.739238	1.15178
TCONS_00059861	0.874877	0.061965	0.223338	0.072879	0.191746	0.225144	0.17684	0.229269	0.135428	0.205528	0.364397	0.000235	0.3536	0.199483
TCONS_00402421	0.870845	0.585863	0.840542	0.944871	0.206297	0.068741	0.79424	0.132609	0.522179	0.148842	0.732223	1.04748	0.797209	0.737667
TCONS_00012730	0.867113	0.038558	0.035965	0.477817	0.42275	0.567185	0.942487	0.022149	0.030161	0.334416	0.415202	0.60786	0.053635	0.757374
ENST00000609247	0.862411	1.50839	1.53722	0.19456	1.62966	0.059674	2.95056	0.337311	1.99	2.68407	0.318089	0.080652	0.0836	0.246999
TCONS_00272677	0.861469	0.995342	0.8154	0.937201	1.08651	1.56288	1.40187	1.17923	0.57731	0.926389	0.626364	1.15212	1.12141	1.1103
ENST00000605886	0.860542	0.091977	0.122457	0.06461	0.061868	0.157858	0.112212	0.174826	0.058149	0.099328	0.344119	0.60047	1.03309	0.44535
ENST00000619673	0.857245	0.156973	0.343288	0.325101	0.49248	0.141206	0.110158	0.230057	0.174814	0.349982	0.331193	0.291143	0.122102	0.094148
ENST00000512642	0.855386	0.832127	0.697818	0.621736	1.0333	1.16864	0.803098	0.925089	0.495993	0.522223	0.462464	1.03816	0.792517	0.748501
ENST00000418271	0.850518	0.960064	0.934067	0.977862	1.29699	1.57362	1.62695	1.16246	1.2832	0.635679	0.671336	0.818535	0.7213	0.381092
TCONS_00361960	0.848223	2.34312	1.48501	2.74062	1.63801	3.26214	4.10039	4.81897	2.2397	2.25059	1.56548	4.10199	1.20807	1.25025
TCONS_00411341	0.846041	0.884044	0.895841	1.34897	2.00863	1.91373	1.77793	1.84615	0.981553	0.737279	0.746586	0.91081	0.816284	1.22707
TCONS_00050140	0.845783	2.81414	2.22372	1.7253	1.97825	1.79037	1.85516	1.5081	1.32599	2.11068	1.85476	0	1.43071	1.4681
TCONS_00273202	0.84465	1.12405	1.12556	1.10457	1.49556	1.44301	0.987475	1.54342	1.48397	1.09063	0.606068	1.14154	0.964882	0.970528
ENST00000458103	0.843241	0.227013	0.075382	0.213846	0.630574	0.333951	0.070235	0.340399	0.229397	0.456017	0.355027	0.269173	0.377074	0.252469
ENST00000447668	0.843226	0.397464	0.687296	0.338416	0.391645	0.677418	0.398217	0.437685	0.294585	0.663404	0.007955	0.388579	0.000735	0.034526
ENST00000573447	0.840707	0.008634	0.412067	0.03117	0.48653	0.565951	0.59675	0.034866	0.36389	0.200466	0.021429	0.342821	0.145531	0.431982
ENST00000609742	0.838888	0.181741	0.138832	0.26697	0.168274	0.227582	0.047699	0.312463	0.186166	0.281633	0.248941	0.156764	0.148322	0.076977
TCONS_00110302	0.838744	0.46021	0.412688	0.54416	0.787113	0.755746	0.231479	0.108614	0.192643	0.319676	0.630023	0.750412	0.776475	0.444611
TCONS_00161466	0.836899	0.28906	0.505889	0.555636	0.442896	0.399446	0.285286	0.237089	0.180054	0.2745	0.636509	0.332472	0.689879	0.423272
TCONS_00103701	0.836356	0.416285	0.513582	0	0.527204	0.488124	0.672606	0	0.436306	0.453263	0.797322	0.648323	0.806301	0.543497
ENST00000568654	0.834039	0.957701	0.900956	1.07013	0.79811	1.17804	1.51993	1.55677	0.929831	0.809468	0.663314	1.88709	0.899314	1.91537
ENST00000615671	0.833025	0.604261	0.535865	0.698429	1.34025	1.07383	0.542835	0.586668	0.59825	0.165501	0.791751	0.847549	0.599357	0.743371
ENST00000577215	0.832152	0.30826	0.224993	0.258326	0.161934	0.37095	0.24579	0.423563	0.287054	0.282952	0.299097	0.268856	0.251826	0.212753
TCONS_00069563	0.831554	1.34903	1.69555	1.62082	2.78412	2.44076	1.84746	2.34223	1.74437	1.08662	0.814489	1.55202	1.55452	1.20718
ENST00000608113	0.828448	1.27891	1.06349	1.33156	1.38351	1.68877	2.36689	1.53372	1.93678	2.00079	0.962965	0.686948	0.742584	1.57215
TCONS_00402426	0.824329	1.26968	0.642904	0.500958	1.74718	1.0547	0.321393	0.506626	0.282004	0.960847	0.49283	0.280555	0.42661	0.30023
ENST00000454935	0.824101	0.132618	0.285078	0.115943	0.041108	0.25456	0.198201	0.029651	0.086466	0.039625	0.045989	0.018342	0.145102	0.067328
ENST00000597953	0.823185	1.58547	0.882107	1.02348	1.34965	1.31701	1.70249	1.62513	1.37594	1.91855	1.33592	1.34378	0.751411	0.93003
TCONS_00059687	0.823085	1.67651	1.26783	0.321799	0.637891	0.426159	1.07302	1.22178	0.982913	0.857612	0.701943	0.547464	0.480473	0.683654
TCONS_00165269	0.822499	0.225594	0.586453	0.421176	1.20154	0.233203	0.188638	0.32197	0.467378	0.585589	1.69161	0.513024	0.491937	1.01307
ENST00000609428	0.818793	0.140342	0.330598	0.341724	0.027523	0.105114	0.14107	0.254669	0.196755	0.103504	0.181036	0.166615	0.073478	0.149611
ENST00000411453	0.817171	0.69716	0.577228	0.601501	1.03789	0.69929	1.12396	0.468712	0.417986	0.512248	1.12674	1.77452	1.01139	1.13537
TCONS_00334225	0.81698	0.062503	0.176286	0.124215	0.152619	0.082213	0.703145	0.069157	0.096789	0.079958	0.095963	0.130145	0.076835	0.09295
TCONS_00405507	0.815721	1.57272	2.20464	1.51835	2.24345	2.18152	2.16742	1.87759	0.906086	0.788062	0.751987	1.14677	1.1943	1.71314
ENST00000610272	0.813244	0.823936	0.500613	0.797982	0.762046	1.07896	1.35584	0.86967	0.061772	1.65254	1.33815	0.693416	0.789809	0.492889
TCONS_00396134	0.811559	0.926159	0.844046	0.93208	1.03618	1.18192	1.61813	1.33847	0.959786	1.03462	0.837791	1.15858	0.472614	1.06503
TCONS_00260533	0.809015	0.804072	0.432386	0.315802	0.22565	0.351637	0.514323	0.544189	0.235329	0.471751	0.66113	0.368721	0.321519	0.214119
ENST00000585457	0.808972	0.19095	0.132758	0.200527	0.243296	0.29134	0.763517	1.66123	0.591766	0.644322	0.277455	0.46019	0.359352	0.145387
TCONS_00313616	0.808725	3.14889	3.33424	2.10404	2.05457	2.36222	3.44271	4.29798	3.13645	4.06181	1.61383	1.54722	1.30723	0.734251
ENST00000498304	0.808427	5.69022	5.14367	3.40153	2.45262	0.104844	3.81867	3.73045	0.190382	1.53232	2.27971	3.09466	1.30003	0
TCONS_00407603	0.807279	0.499187	0.759696	0.94526	1.41966	1.24114	0.618367	0.451913	0.304327	0.43759	0.991923	0.654146	0.933594	0.482476
TCONS_00044911	0.80448	0.278567	0.46101	0.309415	0.430643	0.492412	0.396823	0.406484	0.244331	0.38205	0.459558	0.246	0.391779	0.327889
ENST00000630523	0.804098	0.383561	0.357353	0.505738	0.388081	0.468712	0.56877	0.480061	0.333422	0.479336	0.519765	0.5244	0.842791	0.285462
ENST00000588785	0.797726	0.566607	0.436347	0.141563	0.566521	0.556083	0.93582	0.363691	0.199246	0.647397	0.638473	0.442594	0.314047	0.212286
ENST00000607902	0.797545	0.46333	0.352474	0.198886	0.276104	0.467398	0.556719	1.12575	0.502991	0.51191	0.235477	0.780628	0.600925	0.861834
ENST00000450917	0.795431	0.340535	0.503013	0.44118	0.658764	0.444464	0.500251	0.24867	0.330323	0.689342	0.399068	0.690094	0.542128	0.714347
TCONS_00397087	0.795126	0.605223	0.49748	0.764432	1.17818	0.934971	1.13804	1.7448	1.36774	1.2243	0.497864	0.618062	0.627827	0.506935
ENST00000505709	0.79247	0.679193	0.372223	0.42872	0.302143	0.723393	0.291624	0.086985	0.076866	0.310707	0.719307	0.937938	0.361869	0.675577
ENST00000619323	0.788096	0.545493	0.513635	0.3899	0.697558	1.48639	0.290573	0.524147	0.174024	0.30824	0.379414	0.580524	0.621926	0.589995
TCONS_00039590	0.78487	0.937705	1.37294	0.867509	1.72269	2.33299	0.765809	1.06198	1.01371	0.800282	1.22207	0.725336	0.444281	1.07767
TCONS_00065767	0.784319	0.736782	0.997468	0.811005	0.857288	0.760932	0.395445	0.312881	0.567265	0.990771	0.896307	0.695292	0.611063	0.463629
TCONS_00029635	0.783062	0.387361	1.15139	0.661194	1.58758	2.35503	0.117124	0.266996	0.240269	0.730682	0.931891	0.856091	1.20927	0.08771
TCONS_00014760	0.783052	0.44894	0.319432	0.560792	0.760337	0.721554	0.348027	0.217076	0.093791	0.353576	0.313327	0.68446	0.391001	0.286428
ENST00000451940	0.782887	0.445159	1.02887	2.03322	0	0	0.866747	0	0.491896	0	1.53622	0	1.15938	0.708867
ENST00000651145	0.782507	0.393432	0.560286	0.395214	0.460497	0.814097	0.866154	0.796275	0.293385	0.602589	0.471239	0.58466	0.260144	0.543315
ENST00000565382	0.779389	1.69555	1.8418	1.60604	2.33101	1.68999	3.5133	3.7796	3.2159	3.66539	1.95818	1.31703	0.770306	0.953732
TCONS_00104861	0.778097	0.628503	0.779223	1.97423	1.24894	2.0237	9.27134	4.78152	0.427482	1.86806	1.00446	0.78791	1.22564	2.24174
TCONS_00027079	0.776607	0.095586	0.242647	0.110125	0.104112	0.069873	0.22615	0.079091	0.047109	0.099017	0.051347	0.005974	0.117608	0.120932
TCONS_00233501	0.775955	0.447548	0.581645	0.437647	0.711614	0.828016	0.787992	0.51568	0.347652	0.281241	0.465569	0.409449	0.739068	0.288139
TCONS_00033396	0.775224	0.91781	1.13276	1.05705	1.48578	1.44493	1.73294	1.25628	0.749788	0.712756	1.01195	1.15833	1.0589	1.3455
TCONS_00377280	0.774157	0.857086	0.569144	0.420698	0.62043	0.739217	0.96678	0.640422	0.555774	1.25556	1.07502	1.02766	0.733658	0.251376
ENST00000562276	0.771285	0.219353	0.142064	0.247672	0.1729	0.468612	0.36314	0.395229	0.47391	0.686653	0.149862	0.385128	0.667866	0.379439
ENST00000526453	0.769807	0.275448	0.449909	0.384312	0.498251	0.575861	0	0.358989	0.329417	0.498667	0.609572	0.426134	0.469068	0.229859
ENST00000602277	0.769481	0.274356	0.405138	0.377234	0.132822	0.355565	0.021148	0.255056	0.11352	0.239061	0.355542	0.44269	0.281837	0.290973
TCONS_00325698	0.767712	0.611563	0.981667	0.516221	1.46508	1.0527	1.53455	0.956511	1.00965	0.615237	0.75864	0.92431	1.18434	0.603583
ENST00000602575	0.767644	0.539814	0.715756	0.588919	0.71138	0.593843	0.464559	0.497997	0.212011	0.510975	0.512512	0.73981	0.739094	0.577709
ENST00000607946	0.76655	0.469924	0.408315	0.375448	0.349869	0.38879	0.517243	1.18418	0.972198	1.58249	1.07416	0.627359	0.929441	0.319619
TCONS_00007381	0.766376	0.122258	0.241281	0.293271	0.277051	0.345965	0.421647	0.416415	0.116218	0.180151	0.225805	0.265234	0.380833	0.185353
ENST00000621523	0.764008	0.849759	1.12297	0.970414	1.43575	1.29784	0.636989	1.33255	1.40779	1.04543	0.794981	0.831114	1.15912	0.940217
TCONS_00407005	0.761336	0.445402	0.67627	0.661179	0.706335	0.473099	0.471402	0.378017	0.350466	0.650209	0.693532	0.526116	0.915639	0.405934
ENST00000609755	0.760326	0.232329	0.25593	0.275202	0.355926	0.278955	0.279879	0.275992	0.144545	0.137337	0.267294	0.335416	0.651231	0.340097
ENST00000602886	0.759161	0.197997	0.235284	0.407071	0.462872	0.417391	0.229597	0.269467	0.243436	0.494109	0.696372	0.542764	0.896847	0.370481
TCONS_00244915	0.757804	1.43716	1.19925	1.4486	0.79634	1.36661	0.689224	0.263019	0.42339	0.63179	1.07154	0.546007	0.840813	0.785331
ENST00000414584	0.754126	2.44506	2.28677	1.90773	1.2016	0.728164	1.15704	1.1816	0.913794	0.659981	0.876477	0.47903	1.26409	0.919297
ENST00000522817	0.753016	1.30981	0.8414	2.4867	1.31621	1.18349	2.14253	2.00525	0.891958	3.26585	1.83784	1.0435	2.05477	0.967331
TCONS_00353859	0.751452	0	0	0	0.766203	0.000698	0	0	0	0	0	0.444565	0	0.000273
TCONS_00311971	0.750316	0.217192	0.309354	0.341375	0.345684	0.682601	0.573236	0.567338	0.328756	0.177817	0.413999	0.182593	0.24212	0.296408
ENST00000526897	0.749104	0.264382	0.431803	0.578491	0.337767	0.529187	0.87697	0.736896	0.382812	0.809918	0.647915	0.900723	0.846077	0.667828
ENST00000508877	0.746759	1.49838	1.27632	1.27353	1.06792	1.21826	1.6488	1.65353	1.46914	1.38308	1.02924	1.75982	1.41815	1.48871
ENST00000612269	0.746204	0.717927	0.835101	0.915607	0.862565	1.10258	1.22162	1.23162	1.38893	1.86475	1.2348	0.747397	0.992366	1.20643
ENST00000440326	0.745694	2.89422	2.88552	1.92175	1.05191	3.26588	2.07987	1.15758	0.651724	1.12255	1.48489	4.25374	2.98264	5.04017
TCONS_00026424	0.74464	0.232688	0	0.215576	0.111398	0.207426	0.100941	0.227898	0.130335	0.218156	0.273645	0.182042	0.294817	0.139608
ENST00000449579	0.744442	0.272552	0.512232	1.21229	0.73557	0.777682	0.152472	0.410742	0.175686	0.560957	0.312086	0.87619	0.379962	0.462872
ENST00000609436	0.744398	0.585386	0.380124	0.638753	1.00005	1.04247	1.27275	1.3669	0.925267	1.30126	0.840305	0.625603	0.480731	0.904965
ENST00000624670	0.743951	0.811261	0.824553	0.737656	1.16571	0.98382	1.47584	1.72415	1.61285	2.39248	1.39843	1.44905	0.890204	1.00149
TCONS_00114746	0.743816	0.136409	1.48846	0.128292	1.09634	1.70871	0.867825	0.202427	0.114368	0.747716	0.092292	1.20409	1.43839	0.16571
ENST00000454470	0.74362	1.24222	0.830158	0.178065	0.127039	0.206837	0.65377	1.0267	0.262106	0.267056	0.270096	0.807302	0.74968	0.989783
TCONS_00366932	0.737717	1.06817	0.534364	0.384284	0.434201	0.964752	0.832203	0.933897	0.667942	0.228609	0.952154	2.12689	1.22485	2.15698
ENST00000624822	0.737206	0.609342	0.022308	0.482477	0.023741	0.804215	0.024922	0.32861	0.014129	0.019034	0.321841	0.425676	0.381062	0.508412
TCONS_00147521	0.736937	0.392704	0.761697	0.569135	1.01038	0.961841	0.935576	0.312284	0.462564	0.840561	0.702966	0.490921	0.762403	0.571943
TCONS_00050850	0.734212	0.695108	0.712552	0.482341	0.504219	0.602406	0.359812	0.641591	0.422747	0.443339	0.369803	0.516887	0.59022	0.295995
TCONS_00319072	0.733237	0.42072	0.515214	0.431844	0.870699	0.721912	0.606422	0.877991	0.398091	0.768858	0.685514	0.738384	0.581058	0.643309
ENST00000446527	0.731516	0.198582	0.878582	0.723217	0.477048	0.357894	0.295292	0.23615	0.171432	0	0.644905	0.90789	0.8442	0.640539
ENST00000501520	0.73132	0.483511	0.466044	0.286439	0.662968	0.592013	0.504776	0.312028	0.437143	0.587949	0.485361	1.09397	0.894518	0.973555
TCONS_00030374	0.731304	1.28548	1.00746	0.947185	0.851935	0.748692	1.96819	1.44767	1.58061	0.959512	1.41497	1.90515	0.849108	2.00495
ENST00000453324	0.730538	0.589295	0.68413	1.86624	2.02972	1.28732	0.788081	0.642634	0.826615	1.04056	0.953566	0.66135	0.595581	0.309195
ENST00000590523	0.729278	0.580081	0.794478	0.866003	0.447835	0.437275	2.66282	3.77188	2.74626	1.86988	1.39332	0.919234	0.554304	0.561776
TCONS_00223159	0.729084	0.727019	0.234289	0.704087	0.971147	1.03049	0.932305	0.774361	0.482908	0.515359	0.588696	0.621415	0.590492	0.688868
TCONS_00166246	0.728811	0.323758	0.495979	0.372313	0.489251	0.416347	0.501406	0.572462	0.258287	0.745205	0.744872	0.357682	0.561491	0.355536
TCONS_00126859	0.726702	0.122216	0.329654	0.144259	0.139039	0.183504	0.383385	0.385911	0.236461	0.008047	0.454127	0.022635	0.286594	0.31793
TCONS_00260716	0.725222	0.319106	0.330059	0.318909	0.204167	0.339966	0.435462	0.984562	0.170456	0.42293	0.56397	0.243891	0.384766	0.319341
ENST00000561606	0.725022	0.35005	0.268604	0.42441	0.672802	1.04096	0.871138	1.02196	0.075582	0.994715	0.877067	0.06935	0.809024	0.05849
ENST00000527564	0.724868	1.48998	0.576079	0.736218	0.811948	0.79111	2.47527	2.96306	1.77515	2.53582	0.642686	1.16416	0.743909	0.858267
TCONS_00056384	0.723079	0.245383	0.297063	0.091815	0.346559	0.580436	0.225912	0.347918	0.297365	0.236228	0.117336	0.366884	0.408737	0.427977
TCONS_00074911	0.722837	1.41021	0.924785	1.41954	1.48249	1.8306	1.65234	1.80855	1.63218	1.29588	0.671753	1.35146	0.310738	0.758096
TCONS_00297030	0.721745	0.810548	0.880572	0.856144	0.876262	1.0628	1.14113	0.958821	0.606559	0.856529	0.794768	0.717143	0.903215	0.612664
ENST00000617151	0.721664	0.851997	0.8193	0.22397	1.27273	1.29469	1.10309	1.3235	0.926776	0.811248	0.51575	0.496524	0.444477	0.463103
ENST00000609619	0.719263	0.649984	0.344047	0.376492	0.291809	0.542054	0.95153	0.681849	0.500794	0.257126	0.15712	0.717723	0.672572	0.816561
ENST00000619488	0.718773	0.517773	0.770301	0.653453	0.85505	0.689984	0.644622	0.661204	0.45874	0.729763	1.24812	0.730054	0.904197	0.563022
TCONS_00163035	0.717169	0.033688	0.451241	0.007445	0.0665	0	0.030312	0.300584	0.166402	0.432788	0.360638	0.340101	0.034383	0.00459
TCONS_00112942	0.716901	0.510971	0.297477	0.32196	0.778189	0.96216	0	0.020132	0.175186	0.271633	0.90433	1.50646	0.638761	0.794764
ENST00000619226	0.716803	0.224908	0.324234	0.367608	0.144195	0.482086	0.515358	0.574008	0.28144	0.271255	0.238706	0.28322	0.403008	0.286715
ENST00000549651	0.716311	1.15404	0.901282	1.17199	1.56491	1.02428	0.933878	1.12171	0.947053	1.0702	0.793322	1.04845	0.782038	1.17209
ENST00000313807	0.71376	0.558145	0.636282	0.83184	0.774401	1.09306	0.528656	0.141806	0.437319	1.00068	0.930216	0.938501	0.747445	0.765777
ENST00000613454	0.713434	0.604546	0.696133	0.855759	1.24069	1.07022	0.170258	1.59405	0.997424	1.68653	1.16865	0.823029	0.722175	0.683693
TCONS_00244820	0.712517	0.606583	0.443198	0.45746	0.507596	0.805288	0.719373	0.579344	0.070173	0.273981	0.139819	0.49054	0.924052	0.760878
TCONS_00314609	0.709198	0.477317	0.275163	0.406624	0.489276	0.462161	0.559895	0.365782	0.23708	0.477739	0.630073	0.620549	0.701981	0.143123
ENST00000448373	0.707333	0.253227	0.25688	0.362405	0.641523	0.668353	0.435533	0.482986	0.315573	0.378808	0.803431	0.479696	0.503439	0.25303
ENST00000602722	0.707206	0.257548	0.355101	0.444387	0.20002	0.724811	0.276574	0.302882	0.193054	0.639922	0.457366	0.590659	0.688651	0.32271
TCONS_00082073	0.706015	0.896104	0.455566	0.85493	0.991719	1.04866	1.03695	0.317807	0.059941	0.181796	0.073382	0.145361	0.347514	0.217472
ENST00000579383	0.705879	0.350623	0.588716	1.58698	0.137054	0.229621	2.75113	11.7393	6.45311	10.7294	2.62453	3.21122	1.42566	5.04791
TCONS_00073418	0.702051	0.151877	0.209287	0.171326	0.183727	0.245548	0.218251	0.411078	0.188867	0.186022	0.183934	0.191307	0.240331	0.199947
ENST00000650421	0.701044	0.372669	0.047368	0.250564	0.621518	0.143822	0.462871	0.260367	0	0.030752	0.249904	0.270616	0.037619	0.046185
ENST00000455131	0.699506	0.942985	0.98707	1.03289	0.612343	0.449609	0.507949	0.40495	0.187326	0.599927	0.533485	0.646041	0.499159	0.085187
ENST00000425884	0.699241	0.48161	0.780187	0.283315	0.650094	0.735036	0.914812	0.715621	0.410079	0.899004	1.12335	1.24548	1.08272	0.845841
TCONS_00154470	0.699211	0.527264	0.699842	0.467041	0.746361	0.997773	0.948275	0.792634	0.314157	0.670073	0.438159	0.430005	0.765225	0.510373
ENST00000565861	0.696854	0.220033	0.218578	0.843988	0.513769	0.788283	0.088652	0.590989	0.146288	0.103197	0.605805	0.576098	0.42026	0.190168
TCONS_00354137	0.696622	0.321401	0.457411	0.371066	0.456526	0.557465	0.508651	0.368877	0.253437	0.284342	0.379202	0.452737	0.729458	0.468282
TCONS_00179072	0.695757	0.148494	0.294608	0.364793	0.293757	0.281306	0.325073	0.436419	0.158665	0.353434	0.485891	0.43187	0.345657	0.263139
ENST00000602827	0.692203	0.091847	0.362084	0.613301	0.23743	0.425235	0.313401	0.110823	0.201089	0.234182	0.561386	0.366622	0.440662	0.283587
ENST00000577327	0.692185	0.819963	0.517174	0.541898	1.25421	1.06058	1.21614	1.54427	0.891795	1.33066	0.505045	0.858187	0.519513	0.562604
ENST00000606447	0.691941	0.110342	0.393187	0.85669	0.369048	0.406602	0.190036	0.321858	0.23234	0.264742	0.735065	0.322695	0.424038	0.269174
ENST00000617652	0.69165	0.618474	0.717372	1.02726	1.21018	1.1992	0.544848	0.913541	0.718646	0.690003	0.58979	0.689324	0.913644	1.02435
ENST00000543515	0.691084	0.254711	0.588369	0.384029	0.003152	0.549699	0.288523	0.294194	0.259476	0.450511	0.001668	1.0845	0.466069	0.938446
ENST00000569835	0.690921	0.217276	0.47894	0.459113	0.287984	0.280617	0.278083	0.407473	0.455158	0.464168	0.478378	0.190195	0.265631	0.209297
ENST00000417835	0.689963	0.915356	0.811868	0.633543	0.814009	1.18272	1.12641	0.901401	1.02349	1.76596	0.605249	1.25393	0.778437	0.686833
ENST00000594472	0.689825	0.184393	0.360372	0.261132	0.461817	0.603596	0.278473	0.256787	0.162157	0.225339	0.497749	0.301666	0.410596	0.337852
ENST00000452466	0.688726	0	0	0	0	0	0	0	0	0	0	0	0	0.298309
TCONS_00332602	0.684557	1.51856	1.24989	0.577993	1.17707	1.32079	1.1888	0.348407	0.889796	2.40721	1.28676	0.940223	0.80158	0.516789
TCONS_00264443	0.681173	0.807642	0.847051	0.813864	0.772447	0.775737	0.739246	0.554641	0.77864	0.313484	0.70824	1.08692	0.595479	0.55117
TCONS_00241846	0.681034	0.271468	0.621964	0.460699	0.502302	0.546742	0.245391	0.476772	0.465832	0.658637	0.577631	0.349287	0.450113	0.126228
TCONS_00149011	0.675888	0.882254	0.684945	0.772886	0.676139	1.02128	0.732517	0.718248	0.363228	0.313401	0.450154	0.473733	0.65536	0.671422
ENST00000510137	0.675884	2.08578	2.64778	1.83121	0.861574	2.00012	2.98741	2.03745	1.56889	1.14994	1.23535	1.8624	1.41378	1.87978
TCONS_00155413	0.674866	0.388508	0.440423	0.378522	0.682017	0.885604	0.623906	0.691761	0.655152	0.570624	0.488759	0.439732	0.421031	0.318811
TCONS_00221353	0.674712	0.642275	0.315756	0.234317	0.45646	0.381092	0.333597	0.143418	0.188742	0.284367	0.649406	0.353135	0.367103	0.554841
ENST00000553247	0.671718	0.834883	0.986061	0.189662	0.309153	0.516525	0.183993	0.202541	0	0.361565	0.478703	2.40134	1.64266	1.63932
TCONS_00236530	0.67054	0.590032	1.3196	1.06932	1.33	1.35746	0.999303	1.38631	0.467028	0.588295	0.660237	1.14265	1.53642	1.14265
ENST00000607115	0.669724	0.115298	0.426743	0.189923	0.06154	0.228477	0.081449	0.124723	0.099427	0.133967	0.116698	0.135392	0.213634	0.120279
ENST00000629441	0.669411	0.330192	0.323142	0.329378	0.415282	0.697973	0.459706	0.619365	0.593954	0.531748	0.356227	0.671251	0.795008	0.737531
ENST00000506859	0.667293	0.586561	0.392845	0.270073	0.989778	0.790524	0.845376	0.865548	0.47824	0.633618	0.779203	0.595776	0.589439	0.363072
ENST00000604219	0.666758	0.105584	0.145108	0.256125	0.173087	0.107873	0.136962	0.160227	0.152792	0.205015	0.105897	0.094073	0.282368	0.055197
TCONS_00234344	0.664757	0.266443	0.496678	0.388512	0.713176	0.90805	0.501459	0.625509	0.331261	0.349978	0.385152	0.451124	0.603556	0.596363
ENST00000420335	0.664376	0.194797	0.616932	0	0.056973	0.079815	1.35185	0	0	0.121286	0	0.721697	0	0.860529
TCONS_00104860	0.664263	0.35527	0.45798	0.553168	0.331146	0.685439	0.698144	0.669449	0.458352	0.402565	0.497622	0.377147	0.346352	0.402515
TCONS_00070881	0.663133	2.0853	1.56283	1.84178	1.42825	1.75174	0.548746	1.14128	1.44134	1.24794	1.25974	2.04089	2.45036	0.505674
TCONS_00077859	0.660501	0.299022	0.414121	0.297831	0.419147	0.522289	0.374211	0.285025	0.214863	0.263523	0.20252	0.198017	0.359468	0.314931
TCONS_00140730	0.659292	0.274461	0.566838	0.53597	0.492028	0.653725	0.293314	0.131305	0.224901	0.557082	0.565904	0.324875	0.640219	0.342777
ENST00000453317	0.659191	0.860126	0.985302	0.993598	1.47895	0.405001	0.375113	0.854997	0.967347	1.07863	1.09119	1.15698	1.10575	0.871168
ENST00000435378	0.658852	1.22604	1.3942	1.08784	1.18237	0.967215	0.929906	0.797895	0.629593	0.898218	0.946398	1.0617	0.597488	0.562057
ENST00000582858	0.655409	0.128381	0.216738	0.245225	0.266304	0.265092	0.181527	0.435138	0.321497	0.272108	0.151634	0.329934	0.52373	0.201781
TCONS_00271759	0.65396	0.234697	0.217749	0.251042	0.171052	0.364659	0.174285	0.261321	0.236941	0.592283	0.326032	0.138138	0.357192	0.079061
ENST00000602802	0.653341	0.250719	0.440266	0.289238	0.282484	0.404406	0.299249	0.240453	0.413314	0.204017	0.446564	0.435582	0.401382	0.359542
TCONS_00395884	0.652225	1.03251	0.17268	0.045712	0.815457	0.542737	0.095926	0.241608	0.266205	0.711918	0.731213	0.293324	0.46996	0.079074
ENST00000586061	0.652139	0.379697	0.343879	0.148161	0.61564	0.614951	0.268616	0.376952	0.327498	1.26621	0.318682	0.738481	0.269738	0.377857
ENST00000588658	0.650471	0.4106	0.578466	0.382796	0.291901	0.756021	0.561769	0.62561	0.644026	0.836989	0.575094	0.461632	0.699085	0.703772
ENST00000587754	0.650039	0.677892	0.521342	0.466252	0.188048	0.152134	0.001518	1.01249	0.092737	0.700534	0.956523	0.158711	0.308125	1.82708
ENST00000591312	0.649738	0.466764	0.314366	0.135801	0.340734	0.955768	0.992312	0.874706	0.825165	0.568242	0.40351	1.05274	0.374014	1.19772
ENST00000650438	0.649687	0.929054	1.51254	0.028267	1.00745	1.3557	2.11032	1.26265	0.871482	1.00998	1.28178	1.17361	1.30724	0.077994
ENST00000443587	0.646078	2.10975	2.60046	1.61953	1.49457	1.23202	0.307379	0.659381	0.305595	0.974827	0.656116	0.7464	1.04535	0.642265
ENST00000431090	0.645808	0.311058	0.263678	0.283933	0.500148	0.570604	0.116597	0.307696	0.30469	0.753097	0.500616	0.398242	0.356174	0.073023
ENST00000608144	0.644278	0.13265	0.460108	0.336665	0.328935	0.223316	0.15815	0.248685	0.167141	0.274824	0.231398	0.070353	0.231133	0.110875
TCONS_00406282	0.64383	0.66328	0.468473	0.392382	0.690256	0.810442	0.739143	0.666354	0.477155	0.710659	0.529715	0.410763	0.247798	0.561369
ENST00000609701	0.642132	0.309869	0.402663	0.35376	0.197102	0.341845	0.19273	0.156501	0.147495	0.076642	0.185809	0.123217	0.281748	0.419727
TCONS_00292042	0.642113	0.302476	0.467487	0.578123	0.51967	0.623336	0.409448	0.387268	0.200296	0.548005	0.520976	0.489079	0.594452	0.590526
ENST00000609934	0.639844	0.015894	0.267802	0.37982	0.144619	0.103981	0.151091	0.366078	0.179278	0.129027	0.163223	0.178791	0.260017	0.152274
ENST00000607956	0.638124	0.150049	0.160721	0.177119	0.153641	0.155153	0.272701	0.06505	0.017582	0.206206	0.225963	0.145788	0.152196	0.00079
TCONS_00287784	0.637952	0.860621	1.40833	1.17212	0.52609	1.26711	0.627183	0.798895	0.513421	0.290192	0.633791	0.627215	0.479088	0.969288
ENST00000617746	0.636995	0.131967	0.12087	0.484038	0.268483	0.16474	0.185358	0.206034	0.387351	0.544375	0.389933	0.312324	0.111913	0.226096
TCONS_00390672	0.636758	0.125089	0.000146	0.390833	0.275173	1.02746	0.486803	0.827879	0.502541	0.460456	0.570939	0.019356	1.08025	0.575862
ENST00000501918	0.636662	0.238364	0.315679	0.371718	0.416022	0.342025	0.287977	0.569307	0.24369	0.298034	0.438882	0.299738	0.727467	0.160526
ENST00000522365	0.63449	0.460164	0.481989	0.347609	0.399829	0.900099	0.69724	0.628723	0.452721	0.469947	0.320226	0.925591	0.773939	0.884186
ENST00000609212	0.634253	0.219395	0.146479	0.38422	0.430489	0.338844	0.843023	0.576531	0.157842	0.418335	0.905356	1.03704	1.35049	0.477885
ENST00000607145	0.633792	0.323006	0.520672	0.445164	0.327301	0.85688	0.394805	0.632618	0.368946	0.360332	0.661274	0.656191	0.640594	0.564102
ENST00000538077	0.633474	0.500187	0.579525	0.497523	0.555321	0.86431	0.321367	0.295136	0.207011	0.33965	0.526608	0.453141	0.581322	0.406954
ENST00000610008	0.632965	0.826276	0.652925	0.520564	1.13471	0.708433	0.423194	0.846787	0.706129	0.510604	0.696265	1.26933	1.28505	0.561081
TCONS_00306880	0.632209	0.279983	0.275257	0.270004	0.394209	0.46645	0.30976	0.52435	0.188516	0.06517	0.29841	0.316121	0.349085	0.17219
ENST00000574411	0.629494	0.438251	0.405498	0.22692	0.163292	0.258459	0.695613	0.317159	0.39317	0.187235	0.10751	0.555589	0.335236	1.01291
ENST00000609220	0.629197	0.713181	1.14883	0.479998	0.767412	1.11575	0	0	0	0	0.654212	1.30282	0.894785	1.31168
ENST00000608275	0.628351	0.282537	0.238433	0.371728	0.459033	0.336163	0.277959	0.420303	0.420459	0.380487	0.101676	0.224327	0.223753	0.131996
ENST00000426023	0.628276	0.22674	0.126629	0.113284	0.214108	0.35693	0.18333	0.211618	0.091445	0.245165	0.312633	0.577198	0.32463	0.202996
TCONS_00270914	0.626188	0	0.278522	0	0.384114	0.843588	0.241317	0	0	0.305757	0.217236	0.44966	0.619327	0.428645
TCONS_00373425	0.625247	0.573861	0.475242	0.416648	0.348736	0.634346	0.474522	0.549849	0.530207	0.366698	0.428403	0.551772	0.500099	0.536259
TCONS_00026657	0.62508	0.481212	0.577697	0.498692	0.841295	0.896457	0.549901	0.572703	0.512634	0.82989	0.69351	0.586132	0.604499	0.456775
TCONS_00100207	0.623383	1.16458	1.71161	0.755798	0.515209	1.05829	2.24066	3.2826	2.29521	1.99646	1.51477	1.50681	1.54034	1.24193
TCONS_00381141	0.623157	0.342774	1.23859	1.66199	1.85558	1.53326	2.03432	1.91094	1.45674	0.970407	0.621436	0.579138	0.426054	1.55842
ENST00000562082	0.621582	0.186943	0.352391	0.308513	0.271347	0.242625	0.211707	0.092489	0.059512	0.221379	0.388941	0.227993	0.42312	0.14388
ENST00000591825	0.620997	0.321809	0.405277	0.43466	0.861641	0.615384	0.490843	0.442718	0.398599	0.596029	0.652149	0.545899	0.500981	0.456716
ENST00000528514	0.620068	8.2e-05	0.005001	0.00138	0.011062	0.005328	0	0.012459	0.006741	0.027288	0.014475	0.005365	0.012153	0.010302
ENST00000591832	0.61967	0.297434	1.03113	0.845905	1.2369	0.024322	1.88986	0.541278	1.10694	1.09044	1.01324	1.42279	0.592943	1.91528
TCONS_00025757	0.618539	1.48897	0.912239	2.0368	1.39557	1.53855	1.33332	0.770005	0.961555	1.9587	1.39982	2.15594	1.09108	1.29915
ENST00000652769	0.618118	0.394776	0.382845	0.534754	0.333087	0.633556	0.180361	0.292053	0.321726	0.235192	0.421276	0.284941	0.386678	0.356874
ENST00000602810	0.616636	1.41108	1.17977	0.782008	1.6032	1.46404	2.28627	0.938961	0.760851	0.775545	0.580807	1.02822	0.417095	1.09058
TCONS_00308089	0.616149	0.243454	0	0	0.847149	0	0	0.232679	0.024294	0	0.476515	0	0	0
TCONS_00379516	0.616109	0.078588	0.135434	0.100547	0.111051	0.149185	0.075746	0.092012	0.042553	0.051755	0.161962	0.115683	0.111201	0.221914
TCONS_00260032	0.615685	0.114385	0.199441	0.293685	0.517634	0.124005	0.51353	0.111668	0	0	0	0.504785	0.13756	0.331021
ENST00000567714	0.615442	0.477069	0.577587	0.799691	0.370145	0.640129	0.393162	0.458335	0.265435	0.266437	0.434901	0.331014	0.391418	0.711005
TCONS_00008144	0.615147	0.302785	0.319583	0.348699	0.456227	0.437608	0.192466	0.141	0.248115	0.573082	1.15055	0.733363	0.974333	0.562048
TCONS_00009060	0.615138	0.764601	0.435963	0.440261	0.516526	0.427256	0.735575	0.398917	0.432046	0.401199	0.36438	0.607648	0.466681	0.303943
TCONS_00069427	0.614886	0.685807	1.07357	1.12791	1.51653	1.12663	1.17196	1.27057	0.96267	1.56871	1.12407	0.853893	0.846342	0.652007
ENST00000514487	0.613728	1.28316	0.593594	0.51679	0.261716	1.42729	1.03633	1.08672	0.377803	0.475405	0.313406	0.378967	0.396779	2.12132
TCONS_00163039	0.612746	0	0	0	0.164959	0	0.560812	0.102807	0.126953	0	0.078547	0.201432	0.496332	0.443032
ENST00000604954	0.611007	1.34411	1.54887	1.19441	1.53226	1.44944	2.28407	1.10397	0.756268	1.28448	1.46465	2.71391	1.94101	1.25513
ENST00000609270	0.610356	0.381118	0.403585	0.385693	0.289169	0.271452	0.179569	0.336519	0.164393	0.190113	0.224857	0.205729	0.230394	0.207536
ENST00000610988	0.610299	0	0.383152	1.74403	0	1.99769	0.872362	0	2.05545	2.08385	0.495632	0	0	0.953389
ENST00000463183	0.610009	0.618252	0.364065	0	1.00631	0.753059	1.02266	0.619475	0.626698	1.53166	1.35543	1.09846	1.15068	0.874509
TCONS_00071488	0.608106	0.627412	0.724293	0.697588	1.30191	1.29117	0.650249	0.397223	0.596669	1.14231	0.461678	0.629223	0.682055	0.448163
ENST00000553657	0.607609	0.803601	0.562165	0.288245	0.431147	0.607621	0.42023	0.078396	0.209159	0.316775	0.365874	0.460287	0.197517	0.36628
ENST00000434063	0.606979	1.52937	0.597504	0.80103	0.974446	0.941204	0.802163	1.05209	1.07556	0.991355	1.37535	1.2911	0.728398	0.680433
ENST00000399541	0.606824	0.681976	0.785761	0.4145	0.159809	0.43569	0.750861	0.884561	0.484853	0	0	0.845067	0.397028	0.350516
ENST00000570140	0.606429	0.110511	0.208147	0.139147	0.127906	0.171345	0.086795	0.120072	0.061256	0.071314	0.193203	0.132382	0.155705	0.066155
ENST00000606587	0.60419	0.229011	0.284722	0.533245	0.411164	0.255923	0.263875	0.378611	0.651876	0.335499	0.503079	0.444764	0.542073	0.228011
ENST00000461864	0.603502	0.298869	0.245066	0.857315	0.314829	0.323504	0.316139	0.25016	0.27902	0.553749	0.63484	1.22556	0.405209	0.47756
ENST00000613495	0.603297	0.280427	0.623439	0.548917	0.474258	0.511346	0.396606	0.492473	0.159872	0.310798	0.472194	0.766583	0.543568	0.56837
TCONS_00307256	0.601303	0.062243	0.075867	0.001972	0.205971	0.004811	0.005865	0.155141	0.001868	0.002597	0.09022	0.113224	0.100098	0.054734
TCONS_00170633	0.600365	0.678944	0.729536	0.660762	1.04339	0.991446	0.852674	0.77312	0.455511	0.593644	0.484013	0.843932	0.032902	0.674631
TCONS_00212992	0.599263	0.485595	0.409793	0.403232	0.350894	0.368589	1.03992	0.916022	0.402905	0.672044	0.524373	0.653794	0.243614	0.498184
ENST00000441492	0.598091	1.25245	0.819019	0.855417	0.806465	1.68886	0.273851	0.26844	0.166414	0.163184	0.538811	0.93117	0.674176	0.985355
TCONS_00275800	0.598088	0.44053	0.285109	0.245123	0.204708	0.27911	0.508837	0.302999	0.467488	1.08496	0.746987	0.910908	0.306187	0.320396
TCONS_00258078	0.59765	0.225011	0.507292	0.416189	0.765102	1.01556	0.697141	0.752418	0.708759	0.906795	0.726251	0.96314	0.484069	0.848798
TCONS_00022728	0.597488	0.270689	0.246835	0.454131	0.177553	0.267104	0.194137	0.272079	0.227082	0.28297	0.409263	0.140603	0.20279	0.1144
ENST00000596585	0.597053	0.696359	0.076473	0.436306	0.008125	0.047254	1.30204	1.6606	1.28235	0.65019	0.69248	0.486873	0.361623	0.357306
TCONS_00222535	0.59595	0.463246	0.634691	0.624732	0.812381	0.846309	0.90321	0.754248	0.657292	0.667598	0.499035	0.558992	0.491143	0.283198
ENST00000590628	0.595486	0.480386	0.849125	1.0714	0.787463	0.747065	0.434423	0.524732	1.37697	1.33725	1.14977	0.768177	0.150591	0.605578
ENST00000624446	0.595447	0.279315	0.618529	0.375946	0.66863	0.974276	0.673381	0.716917	0.946964	0.630264	1.53561	1.29408	1.00395	0.786205
TCONS_00202529	0.594805	1.65906	1.264	1.36429	1.66181	1.04969	3.81381	4.09658	5.75117	4.10029	2.56253	1.76944	1.18012	0.586689
ENST00000651572	0.594793	1.21136	0.959339	0.982382	0.894167	0.989025	1.66202	2.08269	2.12979	1.79988	2.09455	1.70671	1.43201	1.39596
TCONS_00154158	0.592793	0.097157	0.242126	0.201015	0.236917	0.337295	0.21011	0.205229	0.098304	0.094415	0.29818	0.189118	0.306292	0.167642
TCONS_00386008	0.592351	0.673478	0.676377	0.499338	0.785416	1.08971	1.10208	0.531324	0.304736	0.231295	0.351843	0.676318	0.765268	0.686506
ENST00000606512	0.590851	0.423889	0.28493	0.333604	0.305606	0.198441	0.275589	0.369666	0.202466	0.190563	0.302803	0.321636	0.232151	0.216542
TCONS_00202055	0.590699	0.341625	0.753536	0.567071	0.937524	0.553415	0.155716	0.261896	0.393707	1.42169	1.03546	0.674761	0.844344	0.823372
ENST00000606008	0.589479	0.280077	0.488978	0.505505	0.399995	0.283032	0.494549	1.43497	0.912212	0.922026	0.959472	0.319538	0.576222	0.161893
ENST00000442637	0.589284	0.517288	0.359739	0.098855	0.137053	0.424992	0.441294	0.269568	0.212304	0.253023	0.306656	0.212233	0.277059	0.240529
TCONS_00012222	0.589274	0.33794	0.653321	0.778617	0.64827	0.629867	0.425867	0.595085	0.698589	0.805106	1.04639	0.766023	1.01361	0.567401
TCONS_00127789	0.587761	1.09291	2.98127	3.26029	1.6099	1.90934	0.783303	0.765046	1.03009	0.504995	1.00687	1.00663	0.78475	0.959695
ENST00000527191	0.586916	1.44931	1.28655	1.21768	1.45205	1.77639	1.89795	2.02401	1.18097	1.47325	1.13865	1.3817	0.710817	0.747763
TCONS_00372145	0.58632	1.47327	0.937762	1.09298	1.94752	2.29202	1.63082	1.06675	1.28836	1.33821	1.1429	1.05109	1.18295	1.13623
ENST00000593654	0.586247	0.104992	0.180772	0.236332	0.308059	0.235893	0.29785	0.475905	0.416435	0.669999	0.359749	0.378191	0.324634	0.224383
ENST00000602414	0.585341	0.969642	0.563463	1.14323	1.05137	0.583936	0.874285	1.38767	1.42203	1.94137	2.14064	1.88454	1.77987	2.83
ENST00000576871	0.584932	0.349281	0.361653	0.401855	0.289907	0.687365	1.88577	3.31846	2.5407	1.33789	0.41763	1.19713	0.959679	0.733267
ENST00000533009	0.584421	0.214142	0.324606	0.209064	0.118295	0.339066	0.663897	0.179991	0	0.104955	0.083342	0.13842	0.240402	0.369749
TCONS_00000223	0.58381	0	0.13246	0	0.566507	0	0.092663	0	0.119672	0	0.10277	0.326926	0.563102	0
TCONS_00062820	0.583673	0.666777	0.844507	0.50172	1.08451	1.03749	0.770584	0.525793	0.340145	0.369143	0.442922	0.550336	0.839903	0.87725
ENST00000442171	0.583239	0.74172	0.763863	0.553166	0.542016	1.41211	0.883055	2.05101	0.383891	0.442114	0.567474	1.11043	1.07239	0.617336
TCONS_00131740	0.582303	3.50935	2.70923	1.22616	4.28275	5.01262	1.87443	4.681	4.39654	4.72403	4.94741	5.39692	0.654043	3.10579
TCONS_00268662	0.581745	0.61462	0.805299	0.464486	1.28526	1.18325	1.3079	1.39658	0.923427	0.627929	0.6575	0.776292	0.67945	0.539632
ENST00000520913	0.580669	1.23226	0.930292	0.749577	1.26083	0.951895	0.680383	0.258175	1.03258	1.19592	2.02866	0.993855	1.20981	1.25486
ENST00000561544	0.580455	0	0	0	0	0	0.003673	0.581292	0.02757	0	0	0	0	0.002548
ENST00000561547	0.579111	0.588774	0.604163	0.458132	0.621729	0.884404	1.5438	1.14659	0.706512	0.483517	0.622733	0.739595	0.553745	1.04725
TCONS_00343950	0.578946	0.187642	0.276855	0.208187	0.482955	0.395096	0.317432	0.729162	0.585671	0.596627	0.254302	0.340209	0.422609	0.195997
TCONS_00289612	0.578455	0	0	0	0	0	0	0	0	0	0.399857	0.782547	0.444841	0.349131
ENST00000612011	0.577189	0.685499	0.00676	0.714499	0.73929	0.002003	0.02454	0.370559	0.379576	0.561257	1.71245	0.000971	1.68504	1.36214
TCONS_00365352	0.576353	0	0	0	0	0.478565	0	1.18722	0	0	0	0	0	0
TCONS_00038134	0.57558	0.327758	0.268	0.197436	0.14435	0.338679	0.088769	0.102234	0.008736	0.14617	0.137961	0.308699	0.36517	0.385885
ENST00000607214	0.574632	0.231531	0.154162	0.165824	0.144333	0.102952	0.156287	0.14679	0.048886	0.042376	0.183088	0.115439	0.169636	0.119493
ENST00000611247	0.571809	0.237563	0	0.175887	0.306775	0.358393	0.637523	0.232769	0.14791	0.310194	0.816764	0.52839	0.304804	0.252422
TCONS_00323739	0.571205	1.13015	0.663324	0.475874	0.219146	0.491488	0.657233	0.277916	0.329524	0.196045	0.320455	0.631759	0.706392	0.579272
ENST00000505522	0.571068	0.067676	0.739751	0.103389	0.664069	0.078912	0.124725	0.154954	0.07799	0.234048	0.126623	0.180213	0.344562	0.606141
ENST00000598590	0.570277	0.017165	0.005851	0.022694	0.903221	0.045066	0.999577	0.012246	0.007114	0.538403	0.058826	0.746494	0.034235	0.3953
TCONS_00249712	0.569907	0.217529	0.132586	0.201098	0.583488	0.408388	0.350304	0.230376	0.209357	0.259243	0.433852	0.25391	0.379312	0.361529
ENST00000590740	0.569476	0.172765	0.232261	0.099733	0.12972	0.29957	0.124795	0.182836	0.081537	0.112239	0.274403	0.293768	0.185355	0.185711
ENST00000567905	0.569184	0.315549	0.387019	0.574752	0.618542	0.558794	0.536831	0.382936	0.401255	0.596567	0.616482	0.314059	0.554738	0.137872
ENST00000562328	0.567342	0.355477	0.423695	0.342658	0.388836	0.268719	0.340133	0.354968	0.266082	0.304591	0.390374	0.305311	0.28656	0.235041
TCONS_00395276	0.567219	0.177107	0.227961	0.21008	0.133819	0.165948	0.263349	0.152697	0.09942	0.230551	0.117727	0.117775	0.275435	0.084417
ENST00000597230	0.5667	0.626532	0.592051	0.704701	0.832766	0.754097	0.887907	0.636315	0.604223	1.02532	0.61981	0.867086	0.423029	0.539076
TCONS_00325705	0.565159	0.669876	0.83673	0.473375	0.858942	0.942365	1.54034	1.29736	0.402035	0.88377	0.425817	0.703103	0.605817	0.924645
ENST00000509924	0.564114	0.50447	0.466635	0.413944	0.564854	0.527144	0.475506	0.469207	0.28071	0.289031	0.38635	0.345886	0.199	0.174274
ENST00000621680	0.563515	0.172598	0.177167	0.214876	0.146153	0.241447	0.168954	0.15998	0.127847	0.099978	0.115506	0.206514	0.184286	0.20941
ENST00000585030	0.562768	0.960979	1.55646	1.21421	1.38211	0.642514	1.36687	3.88998	2.43737	4.87278	2.50291	1.97209	1.47021	0.664299
ENST00000445565	0.562068	0.248849	0.273376	0.423047	0.459701	0.476434	0.254639	0.169664	0.245737	0.315538	0.563455	0.275478	0.571513	0.382659
ENST00000425189	0.561445	0.09059	0.094964	0.097934	0.1662	0.14098	0.204041	0.271188	0.086222	0.103101	0.419404	0.223913	0.331893	0.089859
TCONS_00371845	0.560187	0.852238	0.611706	0.378572	0.877395	0.609347	0.635242	0.812062	0.49901	0.755016	0.526966	1.47562	0.914446	0.506252
TCONS_00352178	0.55954	0.098789	0.154319	0.14233	0.171234	0.18879	0.120894	0.142039	0.067945	0.114821	0.197148	0.1641	0.279276	0.131906
ENST00000616916	0.559283	0.380571	0.393336	0.327306	0.482246	0.430503	0.317156	0.507111	0.256398	0.136016	0.249988	0.214397	0.196306	0.165442
TCONS_00000477	0.559069	0.632349	0	1.08703	0.063837	0.103863	0	0	0	0	0.057058	0	0	0.069469
ENST00000436105	0.558983	0	0.132113	0.133048	0.276854	0.133482	0.213034	0	0	0.049731	0.177827	0.200151	0.382223	0.33204
TCONS_00187974	0.55876	0.093228	0.161452	0.226493	0.354969	0.255245	0.275067	0.439432	0.262274	0.331658	0.439002	0.309612	0.299306	0.229051
ENST00000613406	0.558539	0.722461	0.593358	0.478483	0.425234	0.540702	0.972652	1.32503	0.624852	1.21752	0.592301	0.559986	0.520498	0.471111
ENST00000426367	0.558403	0.584125	0.574003	0.440034	0.503721	0.848944	0.719958	0.686712	0.464629	0.390775	0.480041	0.420691	0.108915	0.358038
ENST00000587188	0.557422	0	0.391361	0.438329	0.575704	0.166074	0	0	0.469869	0.503606	0.424153	0.42139	0.572662	0
ENST00000415647	0.557191	0.270215	0.392962	0.328348	0.399595	0.344293	0.27762	0.201643	0.162957	0.376607	1.18372	0.742957	0.792405	0.350925
TCONS_00410140	0.556526	0	0	0.001474	0	0.976823	0	1.0219	0	0	0	0	0	0
TCONS_00397159	0.555688	0.655668	0.326078	0.432841	0.526311	0.881121	2.51727	4.5091	3.42428	2.44957	0.583807	0.791085	0.370463	0.646691
ENST00000603514	0.554978	0.712043	0.533439	0.049734	0.595321	0.054704	0.742946	0.076965	0.461056	0.329106	0.036134	0.653125	0.090481	0.044269
TCONS_00333334	0.554859	0.812668	0.476928	0.515711	0.461145	0.580389	0.940831	1.21702	0.494261	0.432172	0.554278	0.644298	0.643494	0.739848
ENST00000425802	0.554314	1.27433	1.45725	0.75272	0.894642	1.32656	1.30708	2.67923	2.31394	1.75088	0.955884	1.23547	1.05368	0.865217
ENST00000612081	0.55407	0.197543	0.209312	0.15659	0.126122	0.178892	0.094072	0.158717	0.343246	0.090524	0.243712	0.148274	0.411738	0.209523
TCONS_00161633	0.553507	0.227047	0.195501	0.402695	0.259512	0.396529	0.238839	0.268047	0.169341	0.333185	0.52287	0.384906	0.31843	0.150403
TCONS_00208585	0.5534	0.4877	0.167165	0.23863	0.296345	0.273685	0.455602	0.26566	0.263377	0.424734	0.184287	0.177866	0.26805	0.088445
ENST00000482040	0.55182	0.760799	2.47761	8.66195	2.2103	2.51423	0.412513	0.528209	0.393584	0.604314	0.887051	0.954567	0.982789	1.08827
TCONS_00050159	0.551753	0.676871	0.590457	0.372336	0	0.304636	0	0	0	0	0	0	0.67438	0.747972
TCONS_00161748	0.551512	0.887135	0.767343	0.678473	0.34871	0.603002	0.747684	0.232084	0	0.474846	0.882213	0.373414	0.640204	0
TCONS_00399585	0.551326	1.0117	0.644456	0.432309	0	0.958745	1.28031	1.44553	0.744475	0.530449	0.478407	1.32601	0.871929	0.970306
ENST00000518181	0.55113	0.446989	0.432065	0.367744	0.611434	0.985427	0.65945	0.680425	0.26491	0.356891	0.273293	0.978548	0.478675	0.523844
TCONS_00176264	0.551106	0.277966	0.452835	0.282437	0.279309	0.372904	0.283574	0.244288	0.069289	0.137281	0.295928	0.251229	0.430648	0.327318
TCONS_00202786	0.549757	0.862738	0.919256	1.14101	1.44338	0.675772	1.43894	1.14795	1.4117	1.33705	2.15346	2.75572	1.72632	1.37163
ENST00000562842	0.54973	0.767	0.642677	0.529736	0.115029	0.659876	0.216759	0.002	0.165248	0.205325	0.243702	0.036069	0.209093	0.370134
ENST00000528887	0.54967	0.100945	0.236202	0.109892	0.461319	0.096633	0.011339	0.65228	0.004766	0.31403	0.003254	0.137107	0.173016	0.091752
TCONS_00132222	0.54889	0.209112	0.289381	0.142204	0.429917	0.394017	0.546883	0.223008	0.197175	0.142404	0.325036	0.7481	0.630158	0.657892
ENST00000610052	0.548216	0.633227	0.688902	0.951994	1.08516	0.818764	0.838956	0.891018	0.370807	0.503936	0.529652	0.65811	0.532767	0.368939
ENST00000471090	0.54708	0.327081	0.063518	0.431361	0.43667	0.341304	0.216555	0.592119	0.078668	0.636272	1.31635	0.623701	0.865294	0.292309
ENST00000499871	0.546905	0.42369	0.385841	0.016077	0.094029	0.087598	0.514177	0.615059	0.442933	0.023842	0.580107	0.04378	0.753065	0.363035
ENST00000531585	0.545131	0.675726	0.802661	0.567463	0.423669	0.246766	1.43433	1.13023	1.00686	0.701634	0.930291	0.999827	1.13302	0.391023
TCONS_00268984	0.54476	2.82785	2.49148	1.72294	0.576268	1.16803	1.0159	0.805525	0.365595	0.424315	0.355013	1.67981	2.5177	3.36919
TCONS_00000129	0.543825	0.831051	0.794685	0.909096	0.907638	0.861158	0.807012	0.84529	0.64885	0.419003	0.507353	0.734534	0.24557	0.714804
TCONS_00340875	0.543351	0.736776	0.750774	0.580271	1.04409	0.86473	0.659774	0.883696	0.434029	0.659143	0.530945	0.562763	0.557127	0.492976
ENST00000620617	0.542668	0.500605	0.592538	0.757513	0.662578	0.813687	2.64377	2.50653	1.5995	1.24548	0.972107	0.692875	0.78526	0.593759
ENST00000521696	0.539432	1.53892	0.938791	0.69447	2.03363	1.97755	2.64995	2.09881	1.86784	0.959783	1.12801	2.33476	0.729721	2.86999
ENST00000560994	0.538742	0.049244	0	0.105267	0	0	0.393891	0	0	0	0	0.504519	0	0
TCONS_00285016	0.538257	0.889129	0.941237	0.508559	0.374013	1.19371	1.12107	0.968001	0.573751	0.314285	0.289182	0.649344	0.179038	0.642676
ENST00000619625	0.538247	0.117445	0.223479	0.245504	0.143364	0.135911	0.140319	0.12305	0.100563	0.148643	0.201217	0.119214	0.177309	0.082715
ENST00000602609	0.537329	0.157265	0.180541	0.34519	0.290485	0.38431	0.246844	0.163504	0.122194	0.190045	0.373152	0.350736	0.424413	0.329351
ENST00000428008	0.536674	1.00974	1.31794	1.90085	1.24663	1.5776	1.07886	1.27501	2.80859	1.97257	7.63201	2.30669	1.76885	4.81066
TCONS_00326367	0.536674	0.186125	0.014255	0.016956	0.059324	0.148511	0.036176	0.028677	0.027553	0.042449	0.023573	0.331154	0.023308	0.016475
TCONS_00370202	0.536412	0.074161	0.037376	0.527989	0.802334	0.00555	0.683123	0.704971	0.48264	0.005437	0.599606	0.004143	0.575573	0.505919
TCONS_00343837	0.535001	0.762984	1.42573	1.15459	2.64252	1.66459	2.58234	1.44616	0.695712	1.87934	0.92288	2.12762	2.79628	1.31652
ENST00000621707	0.533728	0.964756	1.22175	0.733898	0.843502	0.655221	2.13081	2.80118	2.57044	0.023205	1.78932	2.09196	1.12939	0.011577
ENST00000528156	0.532433	0.539933	0.467264	0.328321	0.303281	0.422736	0.502631	0.337037	0.223944	0.219726	0.608393	0.688285	0.412219	0.41374
ENST00000608721	0.532019	0.620135	0.324401	0.300743	0.385793	0.531842	1.15362	1.77245	1.39932	1.25117	0.526469	0.329048	0.366308	0.272958
TCONS_00022727	0.531887	0	0	0	0.185606	0.197669	0	0.101589	0	0	0	0.101354	0.215992	0
ENST00000570282	0.531876	0.442542	0.035677	0.04406	0.11733	0.690669	0.025157	0.009467	0.357628	0.682079	0.314279	0.328144	0.53001	0.971796
ENST00000477764	0.531615	0.021984	0.001143	0.153656	0.067265	0.105214	0.023614	0.048625	0.160004	0.214008	0.202915	0.091736	0.115745	0.061608
ENST00000612330	0.531038	0.05096	0.36354	0.396813	0.04112	0.634829	0.803363	0.035306	0.939242	0.836063	0.04806	0.007931	0.357675	0.359043
TCONS_00390674	0.530653	0.000166	0.00015	0.084189	0.140221	1.01253	0.162581	0.63825	0.350423	0.205221	0.383649	0	0.547189	0.155626
ENST00000414006	0.530302	0.386192	0.508587	0.114416	0.367392	0.426729	0.30015	0.234933	0.549181	1.07112	0.803516	0.571507	0.497192	0.154135
ENST00000602597	0.530044	0.054771	0.145377	0.042254	0.084382	0.036416	0.108954	0.299481	0.10617	0.211957	0.235534	0.097568	0.096626	0.074223
ENST00000547492	0.528947	0.490516	0.663018	0.656713	0.090207	1.80148	0.193687	0.157955	0.259025	1.19905	0.405918	0.234049	0.489613	0.604055
ENST00000508269	0.528455	0.324493	0	0.097278	0.162946	0.311272	0.384502	0.244545	0.278571	0.465992	0.286353	0.37599	0.146026	0.307988
ENST00000525941	0.527202	0.688766	0.565957	0.306585	0.253549	0.721511	1.11674	1.07576	0.353706	0.279334	0.253878	0.665099	0.473044	0.398995
ENST00000522221	0.526925	0.002094	0.007485	0.078354	0.029691	0.033724	0.025081	0.010914	0.002916	0.034365	0.026658	0.000111	0.001669	0.022783
ENST00000651190	0.525453	0.452276	0.513989	0.426104	0.643146	0.846862	0.276987	0.265802	0.173777	0.2028	0.317133	0.528067	0.365323	0.688821
ENST00000608095	0.525361	0.2543	0.469404	0.395687	0.333753	0.547433	0.079524	0.165719	0.207364	0.256047	0.466741	0.370241	0.316694	0.317473
TCONS_00216963	0.524176	0.097166	0	0.499855	0	0.018834	0.182614	0.052668	0.248144	0.05525	0.045107	0.164315	0.068699	0.025703
TCONS_00212993	0.524054	0.594585	0.55659	0.494953	0.320745	0.335537	1.37854	1.19949	1.32231	0.636311	0.352636	0.620495	0.474751	0.545745
TCONS_00094286	0.523479	3.64974	1.89974	1.09364	1.36677	1.3613	3.29897	2.20442	1.89792	1.72505	1.07914	1.95322	0.803069	1.23492
TCONS_00081393	0.521897	0.002579	0.055356	0.207836	0.001489	0.029638	0.053573	0.108806	0.037565	0.036409	0.055772	0.051081	0.021262	0.081875
TCONS_00376493	0.520899	0.353301	0.490527	0.331643	0.458874	0.596486	0.44668	0.353187	0.154189	0.167794	0.321221	0.194522	0.319252	0.344596
ENST00000612824	0.520563	0.296038	0.301144	0.075278	0.079777	0.329305	0.774261	0.996881	1.37781	1.10601	0.425552	0.158856	0.103563	0.212666
ENST00000521612	0.520441	0.311241	0.033182	0.439627	0.023059	0.392549	1.04399	0.041755	0.399926	0.844212	0.024107	0.435037	0.029858	0.549135
ENST00000555403	0.519256	0.250089	0.506408	0.598162	0.219783	0.399644	0.310091	0.170334	0.165014	0.136723	0.248745	0.256333	0.410298	0.253505
ENST00000613361	0.518825	0.145151	0.132668	0.086382	0.142562	0.182576	0.08101	0.13807	0.043719	0.062956	0.100475	0.07019	0.104656	0.052321
TCONS_00001860	0.518256	0.740002	0.330093	0.70624	0.985726	1.14906	0.176369	0.399456	0.512457	0.796579	1.19966	1.19181	0.600803	2.37127
ENST00000575312	0.518252	0.508135	0.355621	0.69498	0.969146	0.513325	3.14085	3.95895	2.91932	1.44892	0.94309	0.417041	0.750547	0.174258
TCONS_00017473	0.518163	0.191008	0.324074	0.381746	0.35251	0.307509	0.180059	0.405618	0.127398	0.214254	0.33071	0.173842	0.209501	0.155473
TCONS_00351304	0.51812	0.536375	0.539464	0.553568	0.224711	0.75412	0	0.106952	0.424704	0.323196	0.350216	0	0.555842	0.150698
ENST00000611079	0.517869	0.008859	0.004864	0.00813	0.695172	0.529282	0.934548	1.21871	0.944419	0.569602	0.380221	0.000387	0.005442	0.343539
TCONS_00307245	0.517353	0.055935	0.066386	0.145565	0	0.121003	0.174195	0	0.030562	0.021491	0.109108	0.095815	0.095634	0.065416
TCONS_00249074	0.515734	0.760379	0.764971	0.642546	0.398347	1.16219	0.991768	1.21	0.920948	0.719707	1.02468	0.693165	0.735457	0.749031
ENST00000445051	0.515584	0.092131	0.170992	0.098226	0.071116	0.14415	0.162506	0.120284	0.171034	0.2063	0.052912	0.15227	0.088094	0.138421
ENST00000445680	0.514973	0.43108	0.72583	0.379196	0.400089	0.318844	0.267352	0.696795	0.409319	0.526655	0.483607	0.206067	0.374346	0.326798
TCONS_00246795	0.514422	0	0.234199	0.339795	0	0	0.291354	0.183417	0.13235	0.423104	0.172434	0.454005	0.347232	0.195277
ENST00000433005	0.514258	0.455563	0.643653	0.661542	0.544495	0.895178	0.709553	0.613214	0.624171	0.299118	0.325381	0.746945	0.392443	0.42701
TCONS_00031920	0.514143	0	0	0	0	0.211398	0	0	0	0	0	0.110959	0	0
TCONS_00155988	0.513354	0.390929	0.202833	0.143513	0.249213	0.363184	0.502042	0.345761	0.17578	0.236604	0.140612	0.336486	0.157586	0.334186
ENST00000539116	0.513319	0.874879	1.03927	1.20157	0.529004	0.308302	0.693638	0.624902	0.307686	0.168656	0.470745	1.01524	0.73318	1.00906
TCONS_00003560	0.51314	0.013509	0.366785	0.599864	0.06374	0.0473	0.022662	0	0.016269	0.2126	0.240298	0.393927	0.009459	0.045024
ENST00000448463	0.511287	0.079806	0.113459	0.067002	0.193777	0.154549	0.171168	0.213691	0.276865	0.144943	0.292304	0.074715	0.122445	0.15288
ENST00000425492	0.511176	0.305375	0.262563	0.382984	0.698415	0.348937	0.329621	0.240175	0.312984	0.48333	0.809663	0.807219	0.653076	0.633479
ENST00000354541	0.510757	0.689514	1.00345	0.836712	0.121432	0.38052	0.357622	0.480562	0.537438	1.34384	2.26941	1.85631	0.333456	0.671585
ENST00000609315	0.510623	0.292985	0.134217	0.223688	0.199794	0.475191	0.351691	0.258302	0.021477	0.142475	0.251378	0.270913	0.418456	0.524676
ENST00000522354	0.510292	0.698357	0.40281	0.325148	0.476022	0.763965	0.561611	0.816786	0.510472	0.545163	0.52552	1.1972	1.22054	1.31726
TCONS_00109392	0.510075	0.1201	0.27074	0.236323	0.256892	0.215825	0.126632	0.208311	0.183455	0.247314	0.381045	0.442045	0.530972	0.208231
TCONS_00122716	0.509851	0.621996	0.794781	0.917272	1.47854	0.238196	0.025062	1.10057	0.38653	0.339648	0.368765	1.06656	0.947765	0.731969
ENST00000447424	0.509806	0.526625	0.524115	0.365608	0.332477	0.441242	0.296865	0.294108	0.11737	0.180246	0.354438	0.448298	0.262414	0.250712
ENST00000451496	0.508592	0.691627	0.39177	0.437364	0.339378	0.685087	0.824621	0.417997	0.18321	0.221139	0.539623	0.69935	0.552426	0.553493
ENST00000422049	0.508133	0.632655	0.647956	0.552888	1.14339	1.0453	0.636635	0.382705	0.439878	0.924935	0.882374	0.885886	0.322009	0.20132
ENST00000607679	0.508133	0.070349	0.118962	0.124622	0.031453	0.147886	0.328321	0.239349	0.082591	0.163114	0.207391	0.168202	0.130247	0.267068
ENST00000629257	0.507973	0.850057	0.266308	0.342444	0.17892	0.242395	1.00457	0.464327	0.294606	0.320633	0.470962	1.01573	0.211071	0.290943
ENST00000610267	0.507921	0.329409	0.481431	0.346904	0.381325	0.510823	0.4426	0.313957	0.230188	0.16657	0.372616	0.232771	0.392338	0.289312
ENST00000447343	0.507273	0.185956	0.246379	0.211858	0.183173	0.20697	0.182062	0.233619	0.300579	0.206792	0.298408	0.336123	0.512411	0.249716
ENST00000591815	0.506457	0.438723	0.536655	0.258683	0.415467	0.395047	0.104642	0.206722	0.104257	0.110415	0.326984	0.142133	0.460217	0.141881
ENST00000602768	0.505891	0.429956	0.206815	0.391532	0.398911	0.690686	0.485778	0.448564	0.365018	0.335881	0.625259	0.48291	0.379915	0.49894
ENST00000461019	0.504456	0.740136	0.527476	0.503333	0.378594	0.578736	0.330486	0.225378	0.287438	0.463596	0.558632	1.80539	1.73289	0.397945
ENST00000444858	0.502667	1.40897	1.1337	1.03567	0.567287	0.055021	1.62649	0	0.019561	0.298827	0.584073	0	0.719815	0.676443
ENST00000609955	0.502328	0.157258	0.356616	0.117422	0.141859	0.263656	0.493878	0.84703	0.603374	0.664615	0.388442	0.190611	0.182001	0.086974
ENST00000609803	0.501779	0.149293	0.163594	0.181681	0.294469	0.309564	0.241956	0.301227	0.261087	0.435497	0.242804	0.184575	0.17699	0.199488
ENST00000506914	0.501561	0.186535	0.203055	0.115859	0.138229	0.191898	0.154607	0.15182	0.058574	0.16908	0.241241	0.306094	0.276587	0.294122
ENST00000601369	0.50115	0.27255	1.19967	1.01052	0.251988	0.402092	0.44187	0.10163	0.089379	0.236861	0.546205	0.626605	0.67457	1.01675
ENST00000611056	0.501109	0.116474	0.270458	0.132478	0.155634	0.169993	0.197537	0.296328	0.255243	0.137335	0.069535	0.085761	0.164596	0.026326
ENST00000410966	0.500919	0.326074	0.581308	0.819009	0.596196	0.65451	0.210158	0.395717	0.311195	0.270369	0.561737	0.383234	0.608304	0.470018
ENST00000542933	0.500849	0.201544	0.277303	0.212257	0.257312	0.513584	1.02867	1.37632	0.897176	0.4497	0.276448	0.38734	0.172549	0.294249
TCONS_00062677	0.499952	0.343685	0.224365	0.372673	0.506106	0.646717	0.598391	0.434218	0.16903	0	0.294857	0.438322	0.31439	0.305871
TCONS_00331696	0.499369	0.187066	0.283345	0.199134	0.020321	0.095007	0.324124	0.399083	0.519498	0.809307	0.69841	0.61959	0.443556	0.418841
TCONS_00365748	0.499248	1.31193	1.22121	0.723796	1.03098	0.199453	1.06937	0.766925	0.528627	0.30944	0.431204	1.75123	2.55469	1.87424
ENST00000609682	0.498522	0.309984	0.41249	0.433969	0.289662	0.25341	0.274266	0.302787	0.380336	0.444704	0.509243	0.191344	0.424164	0.112708
ENST00000606629	0.497051	0.291207	0.359339	0.319691	0.159251	0.46293	0.248416	0.278275	0.13411	0.065374	0.137994	0.227624	0.317871	0.350046
TCONS_00151019	0.496995	0.210585	0.287945	0.075578	0.263834	0.090012	0.287397	0.018238	0.102199	0.009168	0.437139	0.332942	0.461159	0.485934
ENST00000521989	0.496426	2.43618	1.37834	1.51581	2.04535	1.69637	0.972767	1.10964	0.486897	0.462504	0.438919	1.44259	1.00779	1.15435
ENST00000607241	0.4963	0.330258	0.417789	0.580811	0.750148	0.196407	0.646314	0.571725	0.00457	0.704825	0.564025	0.306975	0.55421	0.600908
TCONS_00322746	0.496299	0.486944	0.949164	1.01319	2.22404	1.8064	1.51306	1.05099	0.521604	0.408653	0.800796	0.983654	0.693208	0.717501
TCONS_00086473	0.496281	0.376654	0.451306	0.333181	0.43503	0.653307	0.520688	0.551434	0.227093	0.50869	0.614552	0.362976	0.43764	0.388947
ENST00000463397	0.495588	2.52611	2.07082	1.47089	1.16749	1.22905	1.35266	0.929513	1.32693	0.806515	0.63081	0.919205	1.82933	1.80884
ENST00000623860	0.495153	0.09988	0.102204	0.155494	0.103354	0.108526	0.17725	0.225943	0.132265	0.160553	0.177161	0.119422	0.146451	0.120167
ENST00000619697	0.495085	0.446188	0.484002	0.016729	0.585296	0.640962	0.18624	0.089642	0.352617	0.310955	0.331344	0.385105	0.573297	0.322653
TCONS_00280053	0.494878	0	0	0	0.629509	0.001905	1.03624	0.899127	0.246321	0	0.872905	0.337525	0.131411	1.77583
ENST00000619032	0.494663	0.070795	0.031284	0.169387	0.066042	0	0.080869	0.175889	0.082583	0.176884	0.171179	0.085885	0.125139	0.11646
ENST00000608509	0.494228	0.017341	0.047956	0.044639	0	0.027771	0.052718	0.05215	0.0457	0.060803	0.035991	0.091191	0.046795	0.010086
ENST00000603156	0.493931	0.457632	0.166895	0.278663	0.246199	0.570308	1.03001	0.501587	0.239978	0.115542	0.358981	0.557777	0	0
TCONS_00048684	0.492393	0.541212	0.386556	0.457921	0.412695	0.415961	0.569214	0.327693	0.102361	0.135157	0.184414	0.232202	0.344612	0.372573
TCONS_00105620	0.492283	0.928555	1.72565	0.434541	0.926989	0.166728	1.18472	0.133255	0	0	0.823626	0.622078	0.750729	1.20864
ENST00000612689	0.492111	0.415839	0.403952	0.26827	0.383821	0.419583	0.176481	0.779702	0.403565	0.392236	0.346051	0.323695	0.479324	0.428559
ENST00000389897	0.491999	0.691643	0.606255	0.676489	0.520291	0.555004	0.443444	0.507861	0.446108	0.706909	1.59752	0.927921	0.320265	0.341277
ENST00000606459	0.491896	0.329501	0.630334	0.522054	0.182493	0.130895	0.110326	0.148879	0.036633	0.148999	0.539093	0.117578	0.038881	0.143745
ENST00000427796	0.491684	0.171881	0.252082	0.130396	0.105087	0.05845	0.204059	0.211564	0.238869	0.402636	0.133464	0.202081	0.199239	0.168376
ENST00000553102	0.491569	0.511962	0.754328	1.0985	0.934071	0.883085	0.62681	0.426677	0.566976	0.4876	0.458726	0.517079	0.354573	0.530074
ENST00000605571	0.490923	0.191085	0.229539	0.550124	0.726767	0.564891	0.561762	0.727147	0.440191	0.293817	0.316764	0.550419	0.284171	0.398779
ENST00000541391	0.490719	2.85023	3.11559	1.92612	0.516374	0.162023	0.33594	0.486948	0.572034	0.272795	1.05983	3.03846	1.84964	3.2758
TCONS_00150593	0.490092	0.540011	0.461869	0.648834	0.254977	0.631161	0.388353	0.557734	0.778275	0.447665	0.362307	0.603009	0.588407	0.428006
ENST00000414282	0.489865	0.152008	0.142083	0.227892	0.307289	0.202057	0.205542	0.249352	0.11109	0.138898	0.070742	0.221973	0.336378	0.160601
ENST00000564629	0.48892	0.407693	0.4525	0.468243	0.499065	0.539964	0.284543	0.339743	0.541117	0.587348	0.649397	0.450455	0.474022	0.445652
TCONS_00260315	0.488095	0.499655	0.491907	0.403934	0.497489	0.783363	0.612184	0.562891	0.300171	0.324814	0.401299	0.354471	0.539949	0.469663
TCONS_00344133	0.48746	0.150837	0	0.26411	0	0.060946	0	0.222988	0	0	0.159074	0.192165	0.146956	0.150223
TCONS_00159778	0.487125	0.661425	0.897642	1.22167	1.35871	1.00418	0.639741	1.10925	1.13671	1.63851	1.25349	0.886365	0.812123	0.759455
TCONS_00051416	0.486691	0.189735	0.132544	0.119267	0.20412	0.35286	0.089168	0.085946	0.063828	0.181199	0.125737	0.165183	0.39669	0.173391
ENST00000602483	0.486688	1.46565	1.37437	0.878909	1.28447	0.854454	0.692356	1.22094	0.598021	0.781222	0.83182	0.683519	1.2413	1.72143
ENST00000445461	0.485772	0.127067	0.531992	0.07653	0.080766	0.448415	0.492512	0.345818	0.077367	0.182132	0	0.280763	0.186656	0.069669
ENST00000420695	0.484979	0.301795	0.12252	0.368407	0.484154	0.185448	0.230786	0.29103	0.163048	0.273555	0.329275	0.317051	0.4337	0.226145
ENST00000465466	0.484156	0.010731	0.02929	1.03158	1.7429	1.72813	1.66785	0.007177	0.001404	0.020387	0.005211	0.012351	0.003064	0.005702
TCONS_00284861	0.482838	0.336724	0.382704	0.266718	0.671801	0.88352	0.584787	0.42386	0.336815	0.409124	0.668154	0.572823	0.23394	0.696834
TCONS_00059170	0.482755	0.470376	0.423622	0.425063	0.400716	0.52095	0.505085	0.41824	0.451581	0.992379	0.563466	0.656627	0.82371	0.812841
TCONS_00163234	0.482073	0.433333	0.618924	0.573205	0.440279	0.441266	1.00711	0.855079	0.710548	0.853246	0.625986	0.75519	0.410655	0.515971
ENST00000606696	0.481118	0.783326	0.736211	0.398792	0.359714	0.278538	0.468036	0.630259	0.277946	0.372677	0.585877	0.922622	0.88964	1.03859
TCONS_00204697	0.480935	0.00258	0.002074	0.457423	0.005756	0.66747	0	0.625883	0.008186	0	0.0008	0.000632	0.002099	0.01077
ENST00000621575	0.47943	0.225811	0.20654	0.142673	0.114063	0.113967	0.17578	0.490148	0.309121	0.335227	0.293407	0.167428	0.242983	0.127439
TCONS_00243445	0.478819	0.272089	0.008954	0.295153	0.810839	0	0	0.363673	0.340507	0.593656	0.570862	0.071154	0	0
TCONS_00365657	0.477994	0.45503	0.535852	0.334564	0.54039	0.820605	0.577461	0.338647	0.296237	0.159033	0.321142	0.425033	0.578712	0.583491
ENST00000607386	0.477559	0.009472	0.082963	0.159165	0.052959	0.102036	0.079319	0.106842	0.068292	0.163025	0.197182	0.042904	0.120822	0.111742
TCONS_00217552	0.477059	1.49152	1.54071	1.50875	1.57346	1.27034	1.04922	0.910079	0.702306	1.06205	1.17722	1.10648	1.23249	1.21174
ENST00000415809	0.476495	0.325409	0.287144	0.379417	0.348785	0.385742	0.271872	0.258269	0.145253	0.203851	0.156399	0.313732	0.234628	0
ENST00000590626	0.476306	0.377516	1.08534	0.836114	0.884988	0.513832	0.329922	0.510096	0.162461	0.348782	0.707043	0.683592	0.713599	0.685247
ENST00000570080	0.476255	0.337743	0.481598	0.794934	0.648349	0.570705	0.497741	0.457012	0.429721	0.713566	0.605644	0.717685	0.426357	0.242834
TCONS_00030373	0.476207	0.33246	0.455411	0.33212	0.245819	0.338491	0.318464	0.190436	0.133115	0.333679	0.918318	0.572419	0.513949	0.57646
ENST00000632484	0.475704	0.308519	0.290051	0.150259	0.217496	0.17183	0.244812	0.270617	0.300591	0.322232	0.424871	0.354114	0.436692	0.264111
ENST00000457253	0.475354	0.29245	0.160819	0.282356	0.329451	0.399292	0.565433	0.307723	0.382549	0.773666	0.720226	0.393258	0.082854	0.195215
TCONS_00299609	0.475022	0.193772	0.197227	0.153295	0.220852	0.369707	0.183802	0.270977	0.063351	0.172528	0.397331	0.083717	0.056996	0.105693
TCONS_00052519	0.47356	0	0.07456	0	0.145116	0	0.120798	0.117156	0	0.182723	0.258755	0.237263	0.235417	0.147986
TCONS_00400124	0.473522	0.732062	0.831064	0.496341	0.287444	0.634297	0.744702	0.805328	0.639499	0.547737	0.614387	0.61335	0.439243	0.951001
ENST00000449419	0.472946	0.36455	0.326954	0.199252	0.574131	0.427549	0.188092	0.228189	0.507837	0.8812	0.668667	0.337697	0.397511	0.16328
TCONS_00087973	0.472503	0.506817	0.390919	0.719694	0.804356	0.951384	0.765274	0.661885	0.495362	0.355872	0.331335	0.522958	0.479174	0.761196
ENST00000603175	0.472386	0.355698	0.047941	0.251817	0.360007	0.260932	0.328192	0.444509	0.157144	0.34641	0.361123	0.618977	0.595959	0.180385
TCONS_00261224	0.471902	0.440902	0.883228	0.607235	0.683261	0.997277	0.920522	0.835171	0.574878	0.401666	0.444546	0.409208	0.680429	0.74266
ENST00000610220	0.471708	0.118808	0.3143	0.146524	0.10824	0.047981	0.071743	0.188082	0.36058	0.203612	0.031879	0.08835	0.420264	0.093864
TCONS_00391384	0.471179	0.253089	0.045865	0.417525	0.736959	0.691709	0.222703	0.137367	0.086345	0	0.041527	0.470565	0.002784	0.448435
ENST00000507639	0.470627	0.082933	0.705747	0.882774	0.500423	0.999009	0.50228	0.036914	0.035559	0.078014	0.316436	0.498957	0.587146	0.899546
TCONS_00136369	0.469419	0.064353	0.139427	0.017553	0.011216	0.146639	0.281214	0.00635	0.05296	0.140005	0.045743	0.016476	0.095409	0.207241
ENST00000556640	0.467888	0.094746	0.160775	0.17561	0.166778	0.17041	0.144128	0.147397	0.035016	0.06648	0.043843	0.174442	0.119664	0.16685
ENST00000545800	0.467633	1.00335	1.05192	0.814497	0.90254	1.31287	1.44552	1.31798	1.45073	2.21051	1.01492	1.06129	0.777201	0.819943
ENST00000425254	0.46708	0.497226	0.257065	0.174678	0.586143	0.440409	0.462069	0.534118	0.365246	0.286272	0.411929	0.302583	0.502912	0.331187
TCONS_00044278	0.465816	0.213277	0.475424	0.263805	0.338063	0.417271	0.248615	0.431437	0.275487	0.241039	0.758992	0.248557	0.591115	0.325124
ENST00000504792	0.465192	0.12488	0.184621	0.270878	0.281682	0.411263	0.118509	0.804181	0.640545	0.356665	0.185183	0.252824	0.186343	0.307299
TCONS_00020752	0.464505	0.170788	0.371016	0.123405	0.712229	0.55237	0.213161	0.321942	0.262508	0.256219	1.18543	0.745839	0.339623	0.218304
ENST00000608856	0.464231	0.096987	0.174124	0.029405	0.093158	0.276171	0.341025	0.357392	0.221924	0.253264	0.269476	0.250396	0.256392	0.138882
TCONS_00115804	0.463969	0.403237	0.495802	0.483328	0.000686	0.287734	0.873989	0.146096	0.069161	0.359604	0.153177	0.244096	0.483709	0.290284
ENST00000602763	0.463716	2.36865	1.45263	1.6172	1.14131	1.38553	1.55959	1.35788	1.27161	0.968468	1.44614	5.50909	2.13482	2.29969
ENST00000615559	0.463352	0.642156	0.624896	1.03633	1.2673	1.20005	1.17025	0.819516	1.15584	0.797409	0.579772	0.603741	0.330542	0.374925
TCONS_00241184	0.462281	0.470884	1.10751	1.30592	1.74941	1.64373	0.661147	0.730904	0.461433	0.896462	1.17737	0.975181	1.12192	0.786769
TCONS_00187611	0.462189	0.21501	0.27142	0.194038	0.250703	0.428037	0.508249	0.503131	0.316732	0.186273	0.21458	0.177452	0.370661	0.369855
ENST00000444259	0.461195	0.12963	0.188593	0.259657	0.340198	0.169258	0.107584	0.261289	0.128385	0.09664	0.263506	0.127893	0.363184	0.174775
TCONS_00382106	0.461087	0.284645	0.262209	0.238943	0.303687	0.319502	0.120305	0.114774	0	0.455382	0.340014	0.439667	0.14166	0.560221
TCONS_00158471	0.460385	0.096316	0.077639	0.036128	0.015899	0.143354	0.133745	0.074907	0.078612	0.097305	0.102902	0.141954	0.20388	0.086569
ENST00000599259	0.460329	0.30389	0.222155	0.446357	0.24029	0.414802	0.066269	0.250495	0.444344	0.537948	0.389515	0.630974	0.737513	0.521945
ENST00000467537	0.459698	0.213164	0.262125	0.328884	0.277191	0.227128	0.1975	0.403775	0.184519	0.22642	0.309051	0.338523	0.258542	0.225561
ENST00000609349	0.459528	0.184073	0.469435	0.256756	0.265955	0.523479	0.388753	0.355137	0.127726	0.079507	0.293774	0.37856	0.381143	0.407114
ENST00000521609	0.459453	0.338979	0.530108	0.138742	1.37731	0.755683	0.714609	0.186997	0.437111	0.240405	0.349804	0.528045	0.228251	0.574314
TCONS_00105619	0.459311	0.584846	0.095155	0.464036	1.01586	1.44019	0.029601	0.081772	0.26712	0.329063	0.052922	0.050808	0.389978	0.129756
ENST00000503051	0.459303	0.409171	0.214498	0.326296	0.430779	0.515655	0.370214	0.262469	0.271304	0.224543	0.306072	0.217967	0.300485	0.301811
ENST00000524964	0.45872	0.866982	0.802831	0.656163	0.302775	0.69732	1.27043	0.787468	0.726598	0.606108	0.548883	0.529331	0.388055	0.707997
TCONS_00177830	0.458402	0.251983	0.645863	0.569421	0.555479	0.778027	0	0.578646	0.418788	0.548988	1.27105	0.491172	0.547376	0.677018
ENST00000609071	0.457939	0.455142	0.486646	0.342384	0.34262	0.329242	0.42792	0.455261	0.251829	0.227689	0.144988	0.120437	0.266004	0.191801
ENST00000616896	0.457844	0.147808	0.119959	0.150617	0.287852	0.044947	0.279837	0.239589	0.055762	0.138978	0.198522	0.058186	0.049142	0.1322
ENST00000552753	0.457728	0.293259	0.211162	0.1649	0.247282	0.207532	0.266547	0.422935	0.223625	0.304565	0.35364	0.171008	0.347129	0.133949
ENST00000433070	0.457685	1.12267	1.19285	2.10712	1.10496	1.35547	0.365163	0.333921	0.63877	1.16603	0.793543	1.01839	0.517714	0.728642
TCONS_00152198	0.457497	0	0.078336	0.124557	0	0.184294	0	0.194012	0.258633	0	0	0	0.279792	0
TCONS_00102891	0.457296	0.347214	0.476654	0.295708	0.84027	0.55417	0.50058	0.478569	0.262131	0.336189	0.351366	0.466643	0.334706	0.332279
ENST00000602736	0.456369	0.17854	0.26122	0.152772	0.335514	0.236405	0.167066	0.120053	0.032557	0.239967	0.353226	0.337239	0.358736	0.273099
TCONS_00124713	0.45617	0.845148	1.07598	0.950303	1.21346	1.13289	1.07718	0.788241	0.508268	0.599271	0.712022	0.65044	0.711522	0.691405
TCONS_00138703	0.456107	0	0	0	0.08539	0.00396	0	0	0	0.059436	0	0	0	0.133417
ENST00000450784	0.454858	0.45235	0.524116	1.15616	0.709281	0.04641	1.21098	0	0.043401	0.536987	0.843141	0	0.537896	0.683169
TCONS_00269734	0.45474	0.327183	0.029341	0.178609	0	0.020616	0.008828	0.27882	0.220776	0.146093	0.144236	0.462362	0	0.175307
ENST00000572574	0.454398	0	0.095999	0	0	0	0	0	0.071579	0	0.432129	0.171197	0.167267	0.049749
ENST00000304425	0.45438	0.406204	0.847609	0.739828	0.556558	0.568632	0.805102	0.531355	0.599742	0.38575	0.49612	1.04344	0.390959	0.522537
ENST00000609827	0.45316	0.161031	0.220091	0.221426	0.262817	0.171692	0.099379	0.151576	0.099063	0.242258	0.310272	0.168926	0.143184	0.085008
TCONS_00292760	0.451236	0.085473	0.649867	0.091952	0.153934	0.090649	0.1934	0.126153	0.080848	0	0.197261	0.690745	0.346	0.251718
ENST00000561107	0.451167	0.240291	0.112716	0.296748	0.237276	0.175848	0.191078	0.143284	0.327735	0.048175	0.186387	0.157636	0.301556	0.284254
TCONS_00325339	0.450727	0.040313	0.114076	0.116237	0.157128	0.221593	0.057075	0.111354	0.047715	0.100868	0.108786	0.108545	0.25122	0.074957
ENST00000428732	0.448187	0.464905	0.61143	0.490054	0.519535	0.521109	0.403407	0.262157	0.259681	0.142853	0.033846	0	0.341262	0.152035
ENST00000607858	0.447514	0.127689	0.060428	0.036024	0.01675	0.073847	0.227636	0.163504	0.153205	0.013696	0.150605	0.117646	0.127422	0.109597
ENST00000576810	0.447074	0.317135	0.356429	0.249982	0.297823	0.726741	0.647417	0.424267	0.277294	0.300659	0.420322	0.543845	0.375908	0.437816
TCONS_00063123	0.446527	0.108606	0.093744	0.114628	0.209972	0.26466	0.041327	0.146544	0	0.03632	0.246908	0.285132	0.19133	0.00976
TCONS_00303790	0.445368	1.44872	0.523512	1.21852	0.503191	0.524529	0.34391	0.302028	0.098653	0.281159	0.723111	0.875489	0.930311	0.391524
TCONS_00230380	0.445256	0	0.357345	0.013038	0.391083	0.003656	0	0	0	0.276864	0.073412	0	0	0.168109
ENST00000602747	0.445216	0.015525	0.011008	0.196608	0.246518	0.116236	0.032408	0.03175	0.005597	0.182649	0.291657	0.016465	0.018845	0.02201
TCONS_00399587	0.444056	0.688049	0.901753	0.70914	0.790131	0.576814	0	0	0.651323	0	0.613125	0	0.570788	0.785042
ENST00000434112	0.44397	0.110107	0.208102	0.271416	0.297514	0.377738	0.409062	0.489494	0.153263	0.249987	0.618386	0.51936	0.576822	0.265239
TCONS_00272566	0.443146	1.07319	0.828479	0.779498	0.765253	0.717143	1.01109	0.897208	0.272028	0.568535	0.715076	1.63015	0.508871	1.00649
TCONS_00238450	0.443119	0.548285	0.957994	0.762339	0.647759	0.057632	0.736768	0.782112	0.786882	0.184599	0.899485	0.548683	0.473664	0.308199
TCONS_00100944	0.443054	0.024718	0	0.115722	0	0.031354	0.008399	0.073074	0.010984	0.208961	0.217784	0.732733	0.390662	0.650587
ENST00000594262	0.442653	0.189657	0.387482	0.387337	0.422276	0.320429	0.180796	0.455908	0.334595	0.466125	0.50708	0.384171	0.559407	0.317368
ENST00000607670	0.442026	0.477264	0.326384	0.487539	0.583285	0.504881	0.56858	0.736903	0.475518	0.585235	0.322983	0.433878	0.624305	0.470469
TCONS_00327150	0.441736	0.239418	0.412156	0.264031	0.058648	0.314664	0	0.522235	0.551619	0.574714	0.125922	0.183525	0.319086	0.330967
ENST00000424774	0.441354	0.407282	0.531518	0.437963	0.37481	0.262155	0.463489	0.452295	0.158184	0.380075	0.244473	0.292256	0.385776	0.145693
ENST00000358073	0.441123	0.100157	0.128271	0.118437	0.139697	0.130134	0.080427	0.116979	0.047003	0.133781	0.395363	0.219278	0.487897	0.178409
TCONS_00124838	0.441058	0.139903	0.118697	0.09391	0.371016	0.219302	0.178063	0.126421	0.017875	0.049722	0.091564	0.283755	0.319056	0.088401
ENST00000567942	0.440862	0.112812	0.182228	0.107319	0	0.245017	0.22061	0.255494	0.112739	0.212376	0.052301	0.083903	0.304369	0.089014
ENST00000435491	0.440583	0.323622	0.495933	0.473303	0.434867	0.562824	0.43535	0.511832	0.424437	0.456269	0.389419	0.317068	0.388811	0.31643
ENST00000589796	0.439898	0.09621	0.191572	0.131717	0.129324	0.592861	0.277398	0.159991	0.312893	0.544645	0.514523	0.942495	0.645438	0.372617
ENST00000606908	0.43979	0.094732	0.06839	0.150903	0.142788	0.068432	0.089739	0.107031	0.089126	0.064449	0.102856	0.033998	0.321562	0.133562
ENST00000518639	0.439701	0.187256	0.348151	0.335095	0.282956	0.316216	0.209544	0.504637	0.451591	0.51967	0.208546	0.218853	0.154604	0.115496
TCONS_00114775	0.439139	0.607046	0.724484	0.634911	0.855413	0.899467	1.30623	0.899135	0.594929	0.395048	0.37822	0.45246	0.807297	0.540034
ENST00000441587	0.438961	0.472497	0.334798	0.238141	0.197465	0.146936	0.233	0.210421	0.302225	0.55661	0.214309	0.171776	0.278362	0.362067
TCONS_00229151	0.438873	0	0.081205	0	0.010257	0.021877	0	0	0	0.164137	0.003149	0	0	0
ENST00000448927	0.438863	0.115015	0.074912	0.110698	0.142045	0.132072	0.162453	0.13373	0.09289	0.135805	0.293646	0.163057	0.400822	0.056205
ENST00000646636	0.438777	0.557971	0.517578	0.264753	0.280013	0.488294	0.547445	0.392348	0.182146	0.209714	0.466986	0.328751	0.298615	0.415353
ENST00000588387	0.438224	0.04366	0.06008	0.051089	0.085685	0.234474	0.144397	0.056222	0.053718	0.077611	0.166565	0.335301	0.226998	0.163001
ENST00000591629	0.437794	0	0.230418	0	0.438557	0.592003	0	0.155426	0	0	0	0	0	0.493212
TCONS_00272155	0.437236	0.062872	0.242572	0.17025	0.280303	0.45152	0.237594	0.133486	0.206126	0.161509	0.199893	0.224082	0.333683	0.21878
ENST00000557691	0.436725	0.236267	0.286353	0.256232	0.36101	0.335254	0.246879	0.136027	0.06682	0.317372	0.453589	0.339501	0.556752	0.258241
ENST00000443467	0.436406	0.96566	0.685424	0.4518	0.706488	1.55283	0.268517	0.758406	0.021679	0.559638	1.36671	0.651123	1.49994	0.485331
ENST00000602461	0.436225	0.301406	0.366681	0.307277	0.348552	0.513286	0.149814	0.286059	0.156101	0.217542	0.347034	0.374797	0.329811	0.417988
ENST00000420509	0.436031	0	0.346637	0.510932	0.628102	0.529592	2.03996	1.64839	0.841396	0.79609	0.247672	0.738836	0.589046	0.322247
ENST00000594444	0.434865	0.18229	0.213243	0.241023	0.36151	0.412354	0.171433	0.497663	0.130809	0.525106	0.543643	0.195786	0.736029	0.149774
ENST00000609028	0.433861	0.367402	0.234285	0.387208	0.473112	0.645299	0.242495	0.395717	0.438697	0.28494	0.15489	0.098449	0.051582	0.196633
ENST00000420850	0.433401	0.447812	0.899173	0.53915	2.01423	0.409314	0.566643	0.679224	1.14911	0.505478	0.392235	0.654739	0.433974	1.44787
ENST00000511271	0.433328	0.335783	0.199554	0.822087	0.632064	0.503151	0.748187	1.26631	1.61372	1.8154	1.52558	0.652973	0.7063	1.21776
TCONS_00365646	0.432846	0.904205	1.2152	1.06463	1.22601	1.95621	0.928297	0.41161	0.492574	0.596417	0.281281	1.06842	1.02907	1.04174
TCONS_00207527	0.430372	0	0.001149	0.263249	0.201462	0.473487	0.241558	0.653086	0.002652	0.278109	0.385237	0.212679	0.128502	0.023114
ENST00000501011	0.430149	1.90468	0.583836	1.57742	0.765718	1.69009	1.80378	0.579703	0.456187	0.342494	1.09039	1.3785	1.26005	1.54541
ENST00000558334	0.429722	0.127969	0.123359	0.078345	0.091602	0.186579	0.216335	0.361268	0.116185	0.193106	0.078215	0.228311	0.197175	0.300602
TCONS_00298496	0.429149	0.919142	1.08942	0.421296	1.01096	1.38768	1.60366	1.27796	0.908657	0.265662	0.501437	2.04674	1.064	0.632492
TCONS_00177831	0.429036	0.420882	0.495448	1.02263	0.535246	0.725494	0.842972	1.15071	0.91815	0.878039	1.21936	0.773019	0.429509	1.164
TCONS_00126316	0.428611	0.227183	0.177033	0.062594	0.114828	0.249713	0.233857	0.273308	0.074427	0.121814	0.210791	0.182945	0.198845	0.150166
TCONS_00170650	0.428606	0.473583	0.510797	0.447621	0.678501	0.798914	0.574066	0.447421	0.187071	0.207375	0.410073	0.372054	0.492248	0.47631
TCONS_00021817	0.428469	0.293036	0.274261	0.263549	0.49101	0.399598	0.602982	0.932271	0.466999	0.364534	0.29804	0.348888	0.334181	0.337467
ENST00000651660	0.428188	0.136171	0.157998	0.158045	0.11018	0.252541	0.160304	0.234989	0.105186	0.113371	0.31496	0.24171	0.243083	0.26128
TCONS_00276389	0.425631	0.404784	0.34892	0.244637	0.179233	0.453977	0.501445	0.373496	0.14377	0.111776	0.33177	0.508595	0.39997	0.492484
TCONS_00224347	0.425181	0.423403	0.534874	0.448347	0.562283	0.563595	0.596328	0.470634	0.259091	0.275248	0.290984	0.352105	0.252386	0.33728
ENST00000585356	0.424869	0.216423	0.281981	0.282497	0	0.238317	0.258025	0.208199	0	0.013031	0	0.433528	0	0.16626
ENST00000447329	0.424716	1.34022	0.768366	0.702721	0.748874	1.03911	0.967543	0.673815	0.802513	0.294591	1.34827	4.46952	2.44057	4.25435
TCONS_00318837	0.424198	0.122864	0.148443	0.258609	0.15657	0.15922	0.204907	0.260685	0.128398	0.047469	0.279869	0.361377	0.635221	0.252116
TCONS_00325804	0.424185	0.41563	0.58799	0.604501	0.816817	0.443156	0.834199	0.635518	0.465148	0.615263	0.626314	1.66639	1.28463	1.1482
ENST00000599274	0.423985	0.922333	0.687601	0.586466	1.6273	1.10397	1.25066	0.667978	0.815083	1.06875	0.503398	1.05367	0.19799	0.487324
ENST00000606899	0.42389	0.189016	0.179877	0.526931	0.333406	0.469401	0.645219	0.706703	0.508488	0.57763	0.609904	0.300635	0.424421	0.462291
ENST00000566170	0.422947	0.389234	0.300262	0.373099	0.428535	0.332809	0.47054	0.43399	0.548132	0.532706	0.3105	0.262716	0.200157	0.221842
ENST00000507446	0.422711	0.511229	0.094368	0.263459	0.125845	0.186754	0.97896	0.846433	0.097771	0.061191	0.059105	0.130448	0.054188	0.983772
ENST00000452962	0.421604	0.025628	0.194982	0.184166	0.07119	0.218412	0.601239	0.098241	0.026824	0.114643	0.244583	0.424985	0.35828	0.082779
ENST00000600242	0.421597	0.513272	0.237305	0.29458	0.321742	0.201451	0.232787	0.537103	0.516981	0.517364	0.760906	0.44813	0.478177	0.468442
ENST00000606185	0.420355	0.276447	0.342202	0.130677	0.115182	0.253318	0.076529	0.030803	0.049054	0.074369	0.229872	0.121474	0.312133	0.079199
TCONS_00349996	0.420203	0.19843	0	0.227013	0.445174	0.264891	0.384025	0.401529	0.237151	0.432369	0.410573	0.248991	0.354147	0.200415
ENST00000607723	0.4193	0.249152	0.197662	0.224722	0.308519	0.030923	0.124154	0.134593	0.166877	0.042561	0.095849	0.101091	0.179816	0.087543
TCONS_00212376	0.419041	0.32827	0.697008	0.14828	0.12412	0.180922	0.218228	0.314378	0.201355	0	0.364764	0.26361	0.387341	0.221901
ENST00000603468	0.416964	0.149671	0.648293	0.313376	0.477015	0.128308	0.182534	0.687108	0.17913	0.809477	0.06598	0.134724	0.031348	0.018046
TCONS_00000483	0.416591	0.099295	0.160366	0.473232	0	0.008901	0.023632	0.006516	0	0	0.006359	0	0.011172	0
ENST00000620791	0.416456	0.173172	0.068064	0.051249	0.044144	0.151912	0.204746	0.193322	0.166109	0.286327	0.02608	0.141819	0.181234	0.224245
ENST00000415590	0.41636	1.34653	1.69251	1.4007	0.852929	1.18339	1.51492	1.78924	1.47158	1.04681	1.23774	2.64913	1.89842	2.59817
TCONS_00090961	0.416259	0.162277	0.249011	0.154047	0.204812	0.273827	0.231434	0.266107	0.151912	0.165452	0.331828	0.333343	0.394701	0.23558
TCONS_00063115	0.415998	0.436936	0.478515	0.343282	0.230757	0.283473	0.263208	0.212282	0.102199	0.044071	0.482107	0.474963	0.380605	0.207769
ENST00000446489	0.415518	0.229206	0.213683	0.479955	0.405967	0.436372	0.31183	0.210361	0.33432	0.498199	0.457051	0.528746	0.701899	0.65776
ENST00000644577	0.415306	2.36513	2.02252	0.515992	0.964493	0.670317	0.780034	1.30397	0.450912	1.78123	0.565945	1.17518	0.665665	1.31355
TCONS_00306111	0.414784	0.409114	0.333238	0.239184	0.478075	0.632769	0.529375	0.575336	0.267386	0.326566	0.232302	0.440192	0.56954	0.415859
[truncated: 22,131 more rows]

## Sheet: lncRNA.transcripts.0.2FPKM
transcriptID	C_0	C_3	C_6	C_9	C_12	C_24	UV_3	UV_6	UV_9	UV_12	UV_24	UV_48	UV_72	UV_96
[truncated: 5,044 more rows]
