# Supplementary material for: lncRNA-ZFAS1, an emerging gate-keeper in DNA damage-dependent transcriptional regulation
Source: Research Square preprint supplement (doi:10.21203/rs.3.rs-3233912/v1), 2023-09-13
Supplement: Supplementary file 4 [file 212751c8a564879f58743968.xlsx]

## Sheet: Ctrl__even-odd.overlap.PeakAnno
seqnames	start	end	width	strand	V4	V5	V6	annotation	geneChr	geneStart	geneEnd	geneLength	geneStrand	geneId	transcriptId	distanceToTSS	ENSEMBL	SYMBOL	GENENAME
chr10	100022902	100023292	391	*	Peak_896	67	.	Distal Intergenic	10	99875577	100009919	134343	2	23268	ENST00000324109.8	-12983	ENSG00000107554	DNMBP	dynamin binding protein
chr10	100172749	100173010	262	*	Peak_11309	34	.	Intron (ENST00000421367.6/10613, intron 6 of 10)	10	100154860	100186029	31170	2	10613	ENST00000370408.2	13019	ENSG00000107566	ERLIN1	ER lipid raft associated 1
chr10	100275817	100276237	421	*	Peak_4202	46	.	Intron (ENST00000618916.4/282991, intron 3 of 3)	10	100273280	100282936	9657	2	282991	ENST00000618916.4	6699	ENSG00000196072	BLOC1S2	biogenesis of lysosomal organelles complex 1 subunit 2
chr10	100330562	100330975	414	*	Peak_13653	32	.	Promoter (<=1kb)	10	100288154	100330486	42333	2	9033	ENST00000318222.3	-76	ENSG00000107593	PKD2L1	polycystin 2 like 1, transient receptor potential cation channel
chr10	100424063	100424372	310	*	Peak_612	75	.	Intron (ENST00000641571.1/90271, intron 3 of 5)	10	100463041	100483744	20704	1	7479	ENST00000343737.5	-38669	ENSG00000075290	WNT8B	Wnt family member 8B
chr10	100570563	100571690	1128	*	Peak_1029	66	.	Distal Intergenic	10	100536470	100545497	9028	1	55662	ENST00000478787.1	34093	ENSG00000166135	HIF1AN	hypoxia inducible factor 1 subunit alpha inhibitor
chr10	100687061	100687517	457	*	Peak_2063	56	.	Distal Intergenic	10	100735603	100806599	70997	1	5076	ENST00000553492.5	-48086	ENSG00000075891	PAX2	paired box 2
chr10	100715697	100716008	312	*	Peak_6712	41	.	Distal Intergenic	10	100735603	100806599	70997	1	5076	ENST00000553492.5	-19595	ENSG00000075891	PAX2	paired box 2
chr10	100745462	100746077	616	*	Peak_1658	60	.	Promoter (<=1kb)	10	100745711	100829941	84231	1	5076	ENST00000355243.7	0	ENSG00000075891	PAX2	paired box 2
chr10	100824800	100825063	264	*	Peak_1359	60	.	Exon (ENST00000370296.6/5076, exon 9 of 11)	10	100748850	100824654	75805	1	5076	ENST00000554172.2	75950	ENSG00000075891	PAX2	paired box 2
chr10	100867524	100867923	400	*	Peak_11239	34	.	Distal Intergenic	10	100912569	100965136	52568	1	55719	ENST00000238961.8	-44646	ENSG00000119906	SLF2	SMC5-SMC6 complex localization factor 2
chr10	101223015	101223463	449	*	Peak_3592	48	.	Downstream (2-3kb)	10	101229594	101232605	3012	1	399806	ENST00000547077.1	-6131	NA	LBX1-AS1	LBX1 antisense RNA 1
chr10	101224434	101224791	358	*	Peak_1711	59	.	Downstream (1-2kb)	10	101229594	101232605	3012	1	399806	ENST00000547077.1	-4803	NA	LBX1-AS1	LBX1 antisense RNA 1
chr10	101284773	101285172	400	*	Peak_10443	35	.	Distal Intergenic	10	101252821	101263550	10730	2	101927419	ENST00000422661.1	-21223	ENSG00000229649	LINC02681	long intergenic non-protein coding RNA 2681
chr10	101321356	101321684	329	*	Peak_7083	41	.	Distal Intergenic	10	101354033	101557319	203287	1	8945	ENST00000393441.8	-32349	ENSG00000166167	BTRC	beta-transducin repeat containing E3 ubiquitin protein ligase
chr10	101908489	101908922	434	*	Peak_4203	46	.	Intron (ENST00000370033.8/79591, intron 23 of 25)	10	101845599	101889736	44138	2	79591	ENST00000495001.1	-18753	ENSG00000120029	ARMH3	armadillo like helical domain containing 3
chr10	102160222	102160721	500	*	Peak_15848	29	.	Promoter (<=1kb)	10	102160730	102163866	3137	1	9221	ENST00000477977.1	-9	ENSG00000166197	NOLC1	nucleolar and coiled-body phosphoprotein 1
chr10	102223296	102223863	568	*	Peak_7320	40	.	Promoter (2-3kb)	10	102226328	102229589	3262	1	83401	ENST00000370005.3	-2465	ENSG00000119915	ELOVL3	ELOVL fatty acid elongase 3
chr10	102416816	102417137	322	*	Peak_8668	39	.	Promoter (2-3kb)	10	102402619	102419144	16526	2	5662	ENST00000020673.5	2007	ENSG00000059915	PSD	pleckstrin and Sec7 domain containing
chr10	102849666	102849897	232	*	Peak_5882	44	.	Intron (ENST00000631443.1/ENST00000631443.1, intron 2 of 2)	10	102854223	102864961	10739	1	119032	ENST00000339834.9	-4326	ENSG00000166275	BORCS7	BLOC-1 related complex subunit 7
chr10	102905510	102905893	384	*	Peak_2394	53	.	Distal Intergenic	10	102918293	103090221	171929	1	54805	ENST00000369878.8	-12400	ENSG00000148842	CNNM2	cyclin and CBS domain divalent metal cation transport mediator 2
chr10	102936311	102936541	231	*	Peak_7431	40	.	Intron (ENST00000369878.8/54805, intron 1 of 7)	10	102918357	103078351	159995	1	54805	ENST00000433628.2	17954	ENSG00000148842	CNNM2	cyclin and CBS domain divalent metal cation transport mediator 2
chr10	103132124	103132400	277	*	Peak_3965	47	.	Intron (ENST00000404739.7/22978, intron 2 of 16)	10	103099926	103140192	40267	2	22978	ENST00000487810.5	7792	ENSG00000076685	NT5C2	5'-nucleotidase, cytosolic II
chr10	103478922	103479178	257	*	Peak_1323	60	.	Promoter (<=1kb)	10	103472804	103479240	6437	2	119395	ENST00000369783.4	62	ENSG00000183128	CALHM3	calcium homeostasis modulator 3
chr10	103555882	103556117	236	*	Peak_3062	51	.	Promoter (<=1kb)	10	103555232	103571822	16591	1	9148	ENST00000437579.1	650	ENSG00000107954	NEURL1	neuralized E3 ubiquitin protein ligase 1
chr10	109261132	109261452	321	*	Peak_2306	54	.	Distal Intergenic	10	109868636	109871032	2397	2	7511	ENST00000494499.1	609580	ENSG00000108039	XPNPEP1	X-prolyl aminopeptidase 1
chr10	110623970	110624267	298	*	Peak_2395	53	.	Distal Intergenic	10	110644397	110839469	195073	1	282996	ENST00000369519.3	-20130	ENSG00000203867	RBM20	RNA binding motif protein 20
chr10	111060998	111061421	424	*	Peak_2091	56	.	Distal Intergenic	10	111077163	111080907	3745	1	150	ENST00000280155.3	-15742	ENSG00000150594	ADRA2A	adrenoceptor alpha 2A
chr10	111096558	111096904	347	*	Peak_548	77	.	Distal Intergenic	10	111077163	111080907	3745	1	150	ENST00000280155.3	19395	ENSG00000150594	ADRA2A	adrenoceptor alpha 2A
chr10	111100812	111101394	583	*	Peak_14976	30	.	Distal Intergenic	10	111077163	111080907	3745	1	150	ENST00000280155.3	23649	ENSG00000150594	ADRA2A	adrenoceptor alpha 2A
chr10	112134115	112134544	430	*	Peak_747	72	.	Distal Intergenic	10	112153870	112183710	29841	2	57678	ENST00000369425.5	49166	ENSG00000119927	GPAM	glycerol-3-phosphate acyltransferase, mitochondrial
chr10	112349875	112350306	432	*	Peak_13262	33	.	Promoter (1-2kb)	10	112348160	112351795	3636	2	390003	ENST00000640812.1	1489	ENSG00000243316	GUCY2GP	guanylate cyclase 2G, pseudogene
chr10	112930519	112930836	318	*	Peak_1030	66	.	Distal Intergenic	10	112950250	113167678	217429	1	6934	ENST00000355995.8	-19414	ENSG00000148737	TCF7L2	transcription factor 7 like 2
chr10	113366757	113367025	269	*	Peak_5969	44	.	Distal Intergenic	10	113550837	113589602	38766	1	3026	ENST00000542051.5	-183812	ENSG00000148702	HABP2	hyaluronan binding protein 2
chr10	113408722	113409057	336	*	Peak_2726	53	.	Distal Intergenic	10	113550837	113589602	38766	1	3026	ENST00000542051.5	-141780	ENSG00000148702	HABP2	hyaluronan binding protein 2
chr10	113491281	113491652	372	*	Peak_5455	45	.	Distal Intergenic	10	113550837	113589602	38766	1	3026	ENST00000542051.5	-59185	ENSG00000148702	HABP2	hyaluronan binding protein 2
chr10	113590803	113591156	354	*	Peak_779	71	.	Exon (ENST00000369360.7/4892, exon 39 of 41)	10	113567484	113570158	2675	1	3026	ENST00000460714.1	23319	ENSG00000148702	HABP2	hyaluronan binding protein 2
chr10	114239964	114240304	341	*	Peak_16100	29	.	Promoter (<=1kb)	10	114239356	114289873	50518	1	340706	ENST00000603594.2	608	ENSG00000165816	VWA2	von Willebrand factor A domain containing 2
chr10	114523787	114524046	260	*	Peak_15242	30	.	Promoter (2-3kb)	10	114435461	114526830	91370	2	3983	ENST00000369266.7	2784	ENSG00000099204	ABLIM1	actin binding LIM protein 1
chr10	114553781	114554217	437	*	Peak_8488	39	.	Intron (ENST00000392955.7/3983, intron 4 of 22)	10	114547491	114575537	28047	2	3983	ENST00000481974.1	21320	ENSG00000099204	ABLIM1	actin binding LIM protein 1
chr10	116395854	116396090	237	*	Peak_3593	48	.	Distal Intergenic	10	116427867	116477957	50091	1	119548	ENST00000369230.3	-31777	ENSG00000203837	PNLIPRP3	pancreatic lipase related protein 3
chr10	116398103	116398497	395	*	Peak_13656	32	.	Distal Intergenic	10	116427867	116477957	50091	1	119548	ENST00000369230.3	-29370	ENSG00000203837	PNLIPRP3	pancreatic lipase related protein 3
chr10	116517364	116517654	291	*	Peak_7435	40	.	Distal Intergenic	10	116545931	116567855	21925	1	5406	ENST00000369221.2	-28277	ENSG00000175535	PNLIP	pancreatic lipase
chr10	117162901	117163500	600	*	Peak_6307	43	.	Intron (ENST00000419373.2/101927704, intron 1 of 1)	10	117167678	117167774	97	2	100500893	ENST00000583207.1	4274	ENSG00000266782	MIR3663	microRNA 3663
chr10	117561241	117561624	384	*	Peak_7436	40	.	Distal Intergenic	10	117484295	117545068	60774	2	196047	ENST00000551288.5	-16173	ENSG00000229847	EMX2OS	EMX2 opposite strand/antisense RNA
chr10	117762044	117762341	298	*	Peak_7437	40	.	Distal Intergenic	10	117484295	117545068	60774	2	196047	ENST00000551288.5	-216976	ENSG00000229847	EMX2OS	EMX2 opposite strand/antisense RNA
chr10	118397397	118398021	625	*	Peak_4212	46	.	Distal Intergenic	10	118357755	118365103	7349	1	100506126	ENST00000453236.1	39642	ENSG00000232139	LINC00867	long intergenic non-protein coding RNA 867
chr10	118414635	118414872	238	*	Peak_7440	40	.	Distal Intergenic	10	118357755	118365103	7349	1	100506126	ENST00000453236.1	56880	ENSG00000232139	LINC00867	long intergenic non-protein coding RNA 867
chr10	118576842	118577302	461	*	Peak_15736	30	.	Distal Intergenic	10	118589989	118595699	5711	2	2834	ENST00000239032.3	18397	ENSG00000119973	PRLHR	prolactin releasing hormone receptor
chr10	118903836	118904525	690	*	Peak_9842	36	.	Distal Intergenic	10	119029716	119033732	4017	1	340719	ENST00000425699.2	-125191	ENSG00000188613	NANOS1	nanos C2HC-type zinc finger 1
chr10	118949725	118950365	641	*	Peak_1164	64	.	Distal Intergenic	10	119029716	119033732	4017	1	340719	ENST00000425699.2	-79351	ENSG00000188613	NANOS1	nanos C2HC-type zinc finger 1
chr10	119283693	119284000	308	*	Peak_8834	38	.	Intron (ENST00000392870.2/2869, intron 1 of 15)	10	119207589	119455619	248031	1	2869	ENST00000392870.2	76104	ENSG00000198873	GRK5	G protein-coupled receptor kinase 5
chr10	119394844	119395576	733	*	Peak_1715	59	.	Intron (ENST00000392870.2/2869, intron 3 of 15)	10	119377972	119378043	72	1	100616398	ENST00000580598.1	16872	ENSG00000265719	MIR4681	microRNA 4681
chr10	120145833	120146144	312	*	Peak_3048	51	.	Distal Intergenic	10	119958513	119958592	80	1	100616322	ENST00000580643.1	187320	ENSG00000265370	MIR4682	microRNA 4682
chr10	120375006	120375298	293	*	Peak_12802	34	.	Distal Intergenic	10	120354701	120355183	483	2	6144	ENST00000495531.1	-19823	ENSG00000122026	RPL21	ribosomal protein L21
chr10	121978382	121978769	388	*	Peak_7442	40	.	Distal Intergenic	10	121957088	121975217	18130	2	54780	ENST00000369023.7	-3165	ENSG00000107672	NSMCE4A	NSE4 homolog A, SMC5-SMC6 complex component
chr10	124112076	124112683	608	*	Peak_8930	38	.	Distal Intergenic	10	124007666	124093607	85942	2	51363	ENST00000435907.5	-18469	ENSG00000182022	CHST15	carbohydrate sulfotransferase 15
chr10	124124568	124125002	435	*	Peak_986	67	.	Distal Intergenic	10	124007666	124093607	85942	2	51363	ENST00000435907.5	-30961	ENSG00000182022	CHST15	carbohydrate sulfotransferase 15
chr10	125502609	125502871	263	*	Peak_7443	40	.	Distal Intergenic	10	125574371	125578445	4075	1	100169752	ENST00000446081.5	-71500	ENSG00000237675	TEX36-AS1	TEX36 antisense RNA 1
chr10	126293401	126293662	262	*	Peak_4213	46	.	Intron (ENST00000368679.8/8038, intron 2 of 22)	10	126012381	126388455	376075	2	8038	ENST00000368679.8	94793	ENSG00000148848	ADAM12	ADAM metallopeptidase domain 12
chr10	126918836	126919209	374	*	Peak_10450	35	.	Intron (ENST00000280333.9/1793, intron 1 of 51)	10	126905456	127451465	546010	1	1793	ENST00000623213.1	13380	ENSG00000150760	DOCK1	dedicator of cytokinesis 1
chr10	127447725	127447956	232	*	Peak_4214	46	.	Intron (ENST00000280333.9/1793, intron 51 of 51)	10	127549369	127552639	3271	1	594857	ENST00000398023.2	-101413	ENSG00000214285	NPS	neuropeptide S
chr10	12898014	12898270	257	*	Peak_11325	34	.	3' UTR	10	12896625	13001697	105073	2	83643	ENST00000378825.4	103427	ENSG00000151468	CCDC3	coiled-coil domain containing 3
chr10	29812194	29812585	392	*	Peak_11331	34	.	Distal Intergenic	10	29686553	29736781	50229	2	6840	ENST00000465422.1	-75413	ENSG00000197321	SVIL	supervillin
chr10	3602316	3602588	273	*	Peak_4217	46	.	Distal Intergenic	10	3486894	3502838	15945	2	101927880	ENST00000413993.1	-99478	NA	LINC02669	long intergenic non-protein coding RNA 2669
chr10	3782956	3783370	415	*	Peak_2727	53	.	Promoter (<=1kb)	10	3779047	3782051	3005	2	1316	ENST00000173785.4	-905	ENSG00000067082	KLF6	Kruppel like factor 6
chr10	43969070	43969540	471	*	Peak_592	75	.	Distal Intergenic	10	43939003	43944466	5464	1	283033	ENST00000451929.1	30067	NA	LINC00841	long intergenic non-protein coding RNA 841
chr10	43974679	43975662	984	*	Peak_6437	42	.	Distal Intergenic	10	43939003	43944466	5464	1	283033	ENST00000451929.1	35676	NA	LINC00841	long intergenic non-protein coding RNA 841
chr10	44356297	44356781	485	*	Peak_9546	37	.	Distal Intergenic	10	44375867	44385043	9177	2	6387	ENST00000374426.6	28262	ENSG00000107562	CXCL12	C-X-C motif chemokine ligand 12
chr10	44505543	44505878	336	*	Peak_1678	59	.	Distal Intergenic	10	44378557	44386493	7937	2	6387	ENST00000496375.1	-119050	ENSG00000107562	CXCL12	C-X-C motif chemokine ligand 12
chr10	44553673	44553902	230	*	Peak_10451	35	.	Distal Intergenic	10	44378557	44386493	7937	2	6387	ENST00000496375.1	-167180	ENSG00000107562	CXCL12	C-X-C motif chemokine ligand 12
chr10	44819685	44820199	515	*	Peak_10453	35	.	Intron (ENST00000450287.2/220980, intron 7 of 7)	10	44911200	44937002	25803	1	643236	ENST00000389583.4	-91001	ENSG00000187783	TMEM72	transmembrane protein 72
chr10	44847642	44847900	259	*	Peak_13901	32	.	Intron (ENST00000450287.2/220980, intron 2 of 7)	10	44911200	44937002	25803	1	643236	ENST00000389583.4	-63300	ENSG00000187783	TMEM72	transmembrane protein 72
chr10	44889304	44889745	442	*	Peak_5729	44	.	Intron (ENST00000450287.2/220980, intron 2 of 7)	10	44911200	44937002	25803	1	643236	ENST00000389583.4	-21455	ENSG00000187783	TMEM72	transmembrane protein 72
chr10	44923540	44923857	318	*	Peak_14861	31	.	Intron (ENST00000389583.4/643236, intron 1 of 4)	10	44931850	44935035	3186	1	643236	ENST00000460364.1	-7993	ENSG00000187783	TMEM72	transmembrane protein 72
chr10	44950216	44950539	324	*	Peak_11016	35	.	Intron (ENST00000425541.2/ENST00000425541.2, intron 1 of 1)	10	44959407	44994707	35301	1	83937	ENST00000489171.5	-8868	ENSG00000107551	RASSF4	Ras association domain family member 4
chr10	45033846	45034083	238	*	Peak_13165	33	.	Intron (ENST00000456938.6/ENST00000456938.6, intron 5 of 6)	10	44997698	45000888	3191	2	220979	ENST00000625168.1	-32958	ENSG00000165511	C10orf25	chromosome 10 open reading frame 25
chr10	45442843	45443286	444	*	Peak_228	102	.	Promoter (<=1kb)	10	45443242	45444232	991	1	240	ENST00000481117.1	0	ENSG00000012779	ALOX5	arachidonate 5-lipoxygenase
chr10	46043897	46044194	298	*	Peak_11334	34	.	Promoter (2-3kb)	10	46033307	46046269	12963	2	4477	ENST00000581478.5	2075	ENSG00000263639	MSMB	microseminoprotein beta
chr10	46294269	46294546	278	*	Peak_2041	56	.	Promoter (1-2kb)	10	46292810	46294110	1301	1	195977	ENST00000610892.1	1459	ENSG00000274209	ANTXRL	ANTXR like
chr10	46995311	46995584	274	*	Peak_2398	53	.	Intron (ENST00000374342.6/26095, intron 2 of 3)	10	46940582	47002488	61907	1	26095	ENST00000437863.2	54729	ENSG00000204179	PTPN20	protein tyrosine phosphatase non-receptor type 20
chr10	47015854	47016135	282	*	Peak_3205	50	.	Distal Intergenic	10	46940582	47002488	61907	1	26095	ENST00000437863.2	75272	ENSG00000204179	PTPN20	protein tyrosine phosphatase non-receptor type 20
chr10	47227902	47228543	642	*	Peak_614	75	.	Distal Intergenic	10	47300386	47313547	13162	1	2662	ENST00000580279.1	-71843	ENSG00000266524	GDF10	growth differentiation factor 10
chr10	47300966	47301382	417	*	Peak_5730	44	.	Promoter (<=1kb)	10	47300386	47313547	13162	1	2662	ENST00000580279.1	580	ENSG00000266524	GDF10	growth differentiation factor 10
chr10	47310469	47310900	432	*	Peak_15247	30	.	Exon (ENST00000580279.1/2662, exon 2 of 3)	10	47300386	47313547	13162	1	2662	ENST00000580279.1	10083	ENSG00000266524	GDF10	growth differentiation factor 10
chr10	47408687	47409344	658	*	Peak_431	84	.	Distal Intergenic	10	47365496	47384273	18778	2	118738	ENST00000585316.2	-24414	ENSG00000265763	ZNF488	zinc finger protein 488
chr10	47428337	47428566	230	*	Peak_3968	47	.	Distal Intergenic	10	47365496	47384273	18778	2	118738	ENST00000585316.2	-44064	ENSG00000265763	ZNF488	zinc finger protein 488
chr10	47456269	47456498	230	*	Peak_6193	43	.	Distal Intergenic	10	47468541	47484016	15476	2	653145	ENST00000577813.1	27518	ENSG00000265190	ANXA8	annexin A8
chr10	47456749	47457226	478	*	Peak_20682	20	.	Downstream (2-3kb)	10	47468541	47484016	15476	2	653145	ENST00000577813.1	26790	ENSG00000265190	ANXA8	annexin A8
chr10	48251216	48251585	370	*	Peak_9836	36	.	Promoter (<=1kb)	10	48248543	48251611	3069	2	143162	ENST00000492045.1	26	ENSG00000170324	FRMPD2	FERM and PDZ domain containing 2
chr10	48773910	48774211	302	*	Peak_11337	34	.	Intron (ENST00000325239.11/57705, intron 13 of 61)	10	48802738	48824169	21432	1	57705	ENST00000374161.7	-28527	ENSG00000128815	WDFY4	WDFY family member 4
chr10	48837889	48838203	315	*	Peak_4220	46	.	Intron (ENST00000325239.11/57705, intron 39 of 61)	10	48802738	48824169	21432	1	57705	ENST00000374161.7	35151	ENSG00000128815	WDFY4	WDFY family member 4
chr10	49065583	49065817	235	*	Peak_11338	34	.	Intron (ENST00000332853.8/196740, intron 4 of 7)	10	49064151	49077291	13141	2	196740	ENST00000476018.2	11474	ENSG00000165633	VSTM4	V-set and transmembrane domain containing 4
chr10	49084103	49084337	235	*	Peak_1369	60	.	Intron (ENST00000332853.8/196740, intron 3 of 7)	10	49064151	49077291	13141	2	196740	ENST00000476018.2	-6812	ENSG00000165633	VSTM4	V-set and transmembrane domain containing 4
chr10	49108726	49109061	336	*	Peak_1960	57	.	Intron (ENST00000332853.8/196740, intron 1 of 7)	10	49014245	49115509	101265	2	196740	ENST00000332853.8	6448	ENSG00000165633	VSTM4	V-set and transmembrane domain containing 4
chr10	49288184	49288846	663	*	Peak_17853	26	.	Distal Intergenic	10	49296112	49298780	2669	2	100506769	ENST00000437677.1	9934	NA	C10orf71-AS1	C10orf71 antisense RNA 1
chr10	49628310	49628573	264	*	Peak_6587	42	.	Intron (ENST00000339797.5/1103, intron 7 of 14)	10	49637400	49665067	27668	1	1103	ENST00000640822.1	-8827	ENSG00000070748	CHAT	choline O-acetyltransferase
chr10	50265888	50266207	320	*	Peak_17665	27	.	Exon (ENST00000435916.1/ENST00000435916.1, exon 1 of 1)	10	50187242	50248610	61369	2	56624	ENST00000447815.5	-17278	ENSG00000188611	ASAH2	N-acylsphingosine amidohydrolase 2
chr10	50650605	50651237	633	*	Peak_15877	29	.	Distal Intergenic	10	50460673	50625163	164491	2	259230	ENST00000608287.1	-25442	ENSG00000198964	SGMS1	sphingomyelin synthase 1
chr10	50661828	50662060	233	*	Peak_2399	53	.	Distal Intergenic	10	50460673	50625163	164491	2	259230	ENST00000608287.1	-36665	ENSG00000198964	SGMS1	sphingomyelin synthase 1
chr10	51616671	51617277	607	*	Peak_1939	57	.	Intron (ENST00000401604.7/5592, intron 3 of 17)	10	51695487	51699591	4105	2	23283	ENST00000331173.5	82314	ENSG00000177613	CSTF2T	cleavage stimulation factor subunit 2 tau variant
chr10	52778599	52779278	680	*	Peak_2827	52	.	Distal Intergenic	10	52765380	52771700	6321	2	4153	ENST00000373968.3	-6899	ENSG00000165471	MBL2	mannose binding lectin 2
chr10	52952372	52952620	249	*	Peak_4222	46	.	Exon (ENST00000648218.1/ENST00000648218.1, exon 2 of 2)	10	52765380	52771700	6321	2	4153	ENST00000373968.3	-180672	ENSG00000165471	MBL2	mannose binding lectin 2
chr10	53514017	53514326	310	*	Peak_16241	28	.	Distal Intergenic	10	53808522	53810664	2143	2	65217	ENST00000615043.1	296338	ENSG00000150275	PCDH15	protocadherin related 15
chr10	59925937	59926202	266	*	Peak_2400	53	.	Distal Intergenic	10	59788763	59906656	117894	2	8030	ENST00000263102.6	-19281	ENSG00000108091	CCDC6	coiled-coil domain containing 6
chr10	60339948	60340260	313	*	Peak_11341	34	.	Intron (ENST00000280772.6/288, intron 1 of 43)	10	60234688	60300482	65795	2	288	ENST00000503925.1	-39466	ENSG00000151150	ANK3	ankyrin 3
chr10	61523340	61523665	326	*	Peak_11342	34	.	Distal Intergenic	10	61406647	61453450	46804	2	219623	ENST00000399298.7	-69890	ENSG00000196932	TMEM26	transmembrane protein 26
chr10	62557509	62557809	301	*	Peak_13974	32	.	Intron (ENST00000647733.1/22891, intron 4 of 7)	10	62520448	62672011	151564	1	22891	ENST00000395251.5	37061	ENSG00000138311	ZNF365	zinc finger protein 365
chr10	62918940	62919294	355	*	Peak_18686	25	.	Promoter (<=1kb)	10	62814433	62919900	105468	2	1959	ENST00000493899.2	606	ENSG00000122877	EGR2	early growth response 2
chr10	66466660	66466958	299	*	Peak_4224	46	.	Intron (ENST00000433211.6/29119, intron 11 of 17)	10	65920111	66079103	158993	2	29119	ENST00000373735.1	-387557	ENSG00000183230	CTNNA3	catenin alpha 3
chr10	67136677	67137045	369	*	Peak_16242	28	.	Intron (ENST00000433211.6/29119, intron 7 of 17)	10	66766155	67180443	414289	2	29119	ENST00000494580.1	43398	ENSG00000183230	CTNNA3	catenin alpha 3
chr10	68603900	68604309	410	*	Peak_14449	31	.	Intron (ENST00000373644.4/80312, intron 3 of 11)	10	68560656	68694482	133827	1	80312	ENST00000373644.4	43244	ENSG00000138336	TET1	tet methylcytosine dioxygenase 1
chr10	68605672	68605933	262	*	Peak_10941	35	.	Intron (ENST00000373644.4/80312, intron 3 of 11)	10	68560656	68694482	133827	1	80312	ENST00000373644.4	45016	ENSG00000138336	TET1	tet methylcytosine dioxygenase 1
chr10	68675332	68675561	230	*	Peak_6054	43	.	Intron (ENST00000373644.4/80312, intron 8 of 11)	10	68721012	68742408	21397	1	55749	ENST00000536391.5	-45451	ENSG00000060339	CCAR1	cell division cycle and apoptosis regulator 1
chr10	68678313	68678783	471	*	Peak_1887	58	.	Intron (ENST00000373644.4/80312, intron 8 of 11)	10	68721012	68742408	21397	1	55749	ENST00000536391.5	-42229	ENSG00000060339	CCAR1	cell division cycle and apoptosis regulator 1
chr10	68742833	68743334	502	*	Peak_3970	47	.	Intron (ENST00000630771.2/55749, intron 6 of 23)	10	68755172	68755238	67	1	692211	ENST00000636377.1	-11838	ENSG00000283551	SNORD98	small nucleolar RNA, C/D box 98
chr10	68850446	68851160	715	*	Peak_13851	32	.	Intron (ENST00000298596.10/219736, intron 1 of 3)	10	68827624	68893060	65437	1	219736	ENST00000642869.1	22822	ENSG00000165730	STOX1	storkhead box 1
chr10	68929101	68929372	272	*	Peak_1888	58	.	Intron (ENST00000373585.7/79009, intron 8 of 14)	10	68919854	68946553	26700	1	79009	ENST00000466265.1	9247	ENSG00000107625	DDX50	DExD-box helicase 50
chr10	68971017	68971399	383	*	Peak_16243	28	.	Intron (ENST00000354185.8/9188, intron 8 of 14)	10	68956440	68985067	28628	1	9188	ENST00000620315.1	14577	ENSG00000165732	DDX21	DExD-box helicase 21
chr10	69050968	69051303	336	*	Peak_5883	44	.	Distal Intergenic	10	69088106	69104541	16436	1	5552	ENST00000462445.1	-36803	ENSG00000122862	SRGN	serglycin
chr10	69285904	69286164	261	*	Peak_9513	37	.	Intron (ENST00000436817.6/3098, intron 2 of 20)	10	69282555	69364786	82232	1	3098	ENST00000421088.5	3349	ENSG00000156515	HK1	hexokinase 1
chr10	70094458	70094754	297	*	Peak_4225	46	.	Intron (ENST00000373255.8/55506, intron 5 of 8)	10	70114775	70118351	3577	2	84883	ENST00000482166.1	23597	ENSG00000042286	AIFM2	apoptosis inducing factor mitochondria associated 2
chr10	70098314	70098750	437	*	Peak_4226	46	.	3' UTR	10	70114775	70118351	3577	2	84883	ENST00000482166.1	19601	ENSG00000042286	AIFM2	apoptosis inducing factor mitochondria associated 2
chr10	70255088	70255568	481	*	Peak_13662	32	.	Exon (ENST00000277942.6/64106, exon 4 of 4)	10	70218779	70233911	15133	2	5464	ENST00000495346.1	-21177	ENSG00000180817	PPA1	pyrophosphatase (inorganic) 1
chr10	70480011	70480488	478	*	Peak_2401	53	.	Promoter (1-2kb)	10	70478821	70568449	89629	1	27143	ENST00000263563.6	1190	ENSG00000107719	PALD1	phosphatase domain containing paladin 1
chr10	70649926	70650280	355	*	Peak_14864	31	.	Distal Intergenic	10	70672803	70762441	89639	1	140766	ENST00000373207.1	-22523	ENSG00000138316	ADAMTS14	ADAM metallopeptidase with thrombospondin type 1 motif 14
chr10	71397371	71397916	546	*	Peak_2064	56	.	Promoter (<=1kb)	10	71396962	71732723	335762	1	64072	ENST00000616684.4	409	ENSG00000107736	CDH23	cadherin related 23
chr10	71517502	71518512	1011	*	Peak_677	74	.	Intron (ENST00000398809.8/64072, intron 6 of 31)	10	71512113	71646782	134670	1	64072	ENST00000643732.1	5389	ENSG00000107736	CDH23	cadherin related 23
chr10	72290826	72291086	261	*	Peak_20076	22	.	Distal Intergenic	10	72274019	72274635	617	1	54541	ENST00000471240.1	16807	ENSG00000168209	DDIT4	DNA damage inducible transcript 4
chr10	72402604	72402833	230	*	Peak_6244	43	.	Intron (ENST00000398761.8/10367, intron 10 of 11)	10	72332831	72355230	22400	2	54788	ENST00000444643.6	-47374	ENSG00000148719	DNAJB12	DnaJ heat shock protein family (Hsp40) member B12
chr10	72850986	72851230	245	*	Peak_8322	40	.	Intron (ENST00000373053.7/90550, intron 2 of 7)	10	72859995	72868806	8812	1	90550	ENST00000483185.1	-8765	ENSG00000156026	MCU	mitochondrial calcium uniporter
chr10	74938930	74939364	435	*	Peak_10942	35	.	Intron (ENST00000648725.1/23522, intron 3 of 17)	10	74975946	74989096	13151	1	23522	ENST00000648696.1	-36582	ENSG00000156650	KAT6B	lysine acetyltransferase 6B
chr10	75197767	75197997	231	*	Peak_2241	54	.	Distal Intergenic	10	75210154	75230951	20798	1	7417	ENST00000298468.9	-12157	ENSG00000165637	VDAC2	voltage dependent anion channel 2
chr10	77175916	77176324	409	*	Peak_13264	33	.	Intron (ENST00000604624.6/3778, intron 4 of 27)	10	76877600	77183479	305880	2	3778	ENST00000639691.1	7155	ENSG00000156113	KCNMA1	potassium calcium-activated channel subfamily M alpha 1
chr10	77769984	77770791	808	*	Peak_116	134	.	Distal Intergenic	10	77806796	77807977	1182	2	9231	ENST00000484525.1	37186	ENSG00000151208	DLG5	discs large MAGUK scaffold protein 5
chr10	78215418	78215798	381	*	Peak_20418	20	.	Intron (ENST00000634930.1/ENST00000634930.1, intron 1 of 3)	10	78248740	78551355	302616	1	100132987	ENST00000624665.3	-32942	ENSG00000230417	LINC00856	long intergenic non-protein coding RNA 856
chr10	79221458	79221796	339	*	Peak_13852	32	.	Intron (ENST00000334512.9/57178, intron 7 of 24)	10	79201595	79315753	114159	1	57178	ENST00000611351.1	19863	ENSG00000108175	ZMIZ1	zinc finger MIZ-type containing 1
chr10	79463826	79464293	468	*	Peak_1889	58	.	Distal Intergenic	10	79382325	79445627	63303	2	219654	ENST00000372336.3	-18199	ENSG00000165424	ZCCHC24	zinc finger CCHC-type containing 24
chr10	80553660	80553966	307	*	Peak_11353	34	.	Intron (ENST00000339284.6/387694, intron 1 of 6)	10	80540819	80645962	105144	1	387694	ENST00000313455.5	12841	ENSG00000178217	SH2D4B	SH2 domain containing 4B
chr10	80603106	80603401	296	*	Peak_7452	40	.	Intron (ENST00000339284.6/387694, intron 4 of 6)	10	80607299	80646558	39260	1	387694	ENST00000372150.7	-3898	ENSG00000178217	SH2D4B	SH2 domain containing 4B
chr10	83790111	83790551	441	*	Peak_2402	53	.	Distal Intergenic	10	83672406	83675439	3034	2	105378397	ENST00000441776.1	-114672	NA	LINC02650	long intergenic non-protein coding RNA 2650
chr10	86124732	86125042	311	*	Peak_7454	40	.	Intron (ENST00000327946.11/2894, intron 4 of 15)	10	86264694	86264788	95	2	442911	ENST00000362234.2	139746	ENSG00000199104	MIR346	microRNA 346
chr10	86700669	86701051	383	*	Peak_1796	58	.	Intron (ENST00000429277.6/11155, intron 8 of 13)	10	86718730	86726451	7722	1	11155	ENST00000477489.1	-17679	ENSG00000122367	LDB3	LIM domain binding 3
chr10	87070262	87070689	428	*	Peak_7455	40	.	Promoter (2-3kb)	10	87060953	87067839	6887	2	2746	ENST00000474574.1	-2423	ENSG00000148672	GLUD1	glutamate dehydrogenase 1
chr10	92384692	92385232	541	*	Peak_4234	46	.	Distal Intergenic	10	92349481	92350298	818	1	54708	ENST00000492319.1	35211	ENSG00000198060	2022-03-05	membrane associated ring-CH-type finger 5
chr10	93392137	93392718	582	*	Peak_11086	35	.	Intron (ENST00000358334.9/26509, intron 16 of 52)	10	93306429	93379987	73559	2	26509	ENST00000463743.5	-12150	ENSG00000138119	MYOF	myoferlin
chr10	93566659	93567040	382	*	Peak_14293	31	.	Promoter (<=1kb)	10	93566665	93590072	23408	1	338557	ENST00000371481.8	0	ENSG00000186188	FFAR4	free fatty acid receptor 4
chr10	93588864	93589222	359	*	Peak_11360	34	.	3' UTR	10	93591687	93601226	9540	2	5950	ENST00000371464.7	12004	ENSG00000138207	RBP4	retinol binding protein 4
chr10	95170777	95171258	482	*	Peak_7457	40	.	Distal Intergenic	10	95194200	95226405	32206	1	142827	ENST00000327739.7	-22942	ENSG00000173124	ACSM6	acyl-CoA synthetase medium chain family member 6
chr10	96600529	96600885	357	*	Peak_7458	40	.	Intron (ENST00000339364.9/118788, intron 16 of 16)	10	96551311	96587452	36142	2	56889	ENST00000443638.1	-13077	ENSG00000077147	TM9SF3	transmembrane 9 superfamily member 3
chr10	96630096	96630325	230	*	Peak_16252	28	.	Promoter (2-3kb)	10	96595208	96633241	38034	2	118788	ENST00000371109.3	2916	ENSG00000155629	PIK3AP1	phosphoinositide-3-kinase adaptor protein 1
chr10	97078549	97078991	443	*	Peak_13664	32	.	Intron (ENST00000266058.8/6585, intron 4 of 36)	10	97065513	97102556	37044	2	6585	ENST00000497714.1	23565	ENSG00000187122	SLIT1	slit guidance ligand 1
chr10	99527499	99527920	422	*	Peak_18693	25	.	Promoter (<=1kb)	10	99526350	99527443	1094	2	101927324	ENST00000552096.5	-56	ENSG00000257582	LINC01475	long intergenic non-protein coding RNA 1475
chr10	99569740	99570055	316	*	Peak_898	67	.	Distal Intergenic	10	99532953	99536521	3569	1	159296	ENST00000622383.1	36787	ENSG00000119919	NKX2-3	NK2 homeobox 3
chr1	100275320	100275587	268	*	Peak_18695	25	.	Intron (ENST00000370128.8/8634, intron 6 of 10)	1	100281241	100281308	68	1	693138	ENST00000385017.1	-5654	ENSG00000207750	MIR553	microRNA 553
chr1	100327160	100327412	253	*	Peak_9081	38	.	Distal Intergenic	1	100345001	100499460	154460	1	8556	ENST00000644844.1	-17589	ENSG00000079335	CDC14A	cell division cycle 14A
chr1	100333253	100333490	238	*	Peak_8372	39	.	Distal Intergenic	1	100345001	100499460	154460	1	8556	ENST00000644844.1	-11511	ENSG00000079335	CDC14A	cell division cycle 14A
chr1	100531652	100531919	268	*	Peak_2865	52	.	Distal Intergenic	1	100538137	100542018	3882	1	54112	ENST00000315033.4	-6218	ENSG00000181656	GPR88	G protein-coupled receptor 88
chr1	100539935	100540273	339	*	Peak_7460	40	.	Promoter (1-2kb)	1	100538137	100542018	3882	1	54112	ENST00000315033.4	1798	ENSG00000181656	GPR88	G protein-coupled receptor 88
chr1	100592080	100592647	568	*	Peak_12909	34	.	Distal Intergenic	1	100627049	100640613	13565	2	100128787	ENST00000416343.2	47966	NA	LINC01349	long intergenic non-protein coding RNA 1349
chr1	101108681	101109082	402	*	Peak_4238	46	.	Distal Intergenic	1	101082454	101087261	4808	1	102606465	ENST00000451213.1	26227	NA	LOC102606465	uncharacterized LOC102606465
chr1	10141000	10141485	486	*	Peak_15252	30	.	Intron (ENST00000253251.12/10277, intron 16 of 26)	1	10128339	10145599	17261	1	10277	ENST00000466379.1	12661	ENSG00000130939	UBE4B	ubiquitination factor E4B
chr1	10173756	10174193	438	*	Peak_3345	49	.	Promoter (2-3kb)	1	10170956	10180016	9061	1	10277	ENST00000487244.5	2800	ENSG00000130939	UBE4B	ubiquitination factor E4B
chr1	102234773	102235318	546	*	Peak_11366	34	.	Intron (ENST00000447916.1/ENST00000447916.1, intron 5 of 5)	1	101802574	101997030	194457	2	118427	ENST00000370103.8	-237743	ENSG00000118733	OLFM3	olfactomedin 3
chr1	103296486	103296856	371	*	Peak_6123	43	.	Distal Intergenic	1	103001079	103108872	107794	2	1301	ENST00000645458.1	-187614	ENSG00000060718	COL11A1	collagen type XI alpha 1 chain
chr1	104452746	104453123	378	*	Peak_11367	34	.	Distal Intergenic	1	104073851	104125845	51995	1	100129138	ENST00000634997.1	378895	ENSG00000215869	LOC100129138	THAP domain containing 3 pseudogene
chr1	1050406	1050821	416	*	Peak_14603	31	.	Promoter (<=1kb)	1	1050508	1053950	3443	1	375790	ENST00000419249.2	0	ENSG00000188157	AGRN	agrin
chr1	10519586	10519858	273	*	Peak_17063	28	.	Intron (ENST00000472851.1/5195, intron 3 of 3)	1	10535888	10536289	402	1	5195	ENST00000492696.1	-16030	ENSG00000142655	PEX14	peroxisomal biogenesis factor 14
chr1	107664410	107664646	237	*	Peak_4242	46	.	Intron (ENST00000370056.8/10451, intron 19 of 26)	1	107596295	107673649	77355	2	10451	ENST00000529033.5	9003	ENSG00000134215	VAV3	vav guanine nucleotide exchange factor 3
chr1	10774442	10775175	734	*	Peak_19664	24	.	Intron (ENST00000377022.7/54897, intron 1 of 20)	1	10636604	10796648	160045	2	54897	ENST00000377022.7	21473	ENSG00000130940	CASZ1	castor zinc finger 1
chr1	108025448	108025836	389	*	Peak_11371	34	.	Distal Intergenic	1	107571160	107965144	393985	2	10451	ENST00000370056.8	-60304	ENSG00000134215	VAV3	vav guanine nucleotide exchange factor 3
chr1	108121824	108122381	558	*	Peak_2009	57	.	Distal Intergenic	1	108134823	108192818	57996	2	29957	ENST00000370041.4	70437	ENSG00000085491	SLC25A24	solute carrier family 25 member 24
chr1	108572490	108572780	291	*	Peak_3392	49	.	Intron (ENST00000370035.7/284611, intron 1 of 10)	1	108560089	108644900	84812	1	284611	ENST00000405454.1	12401	ENSG00000162636	FAM102B	family with sequence similarity 102 member B
chr1	10925517	10925808	292	*	Peak_14616	31	.	Distal Intergenic	1	10946475	10947870	1396	2	148345	ENST00000468348.1	22062	ENSG00000175262	C1orf127	chromosome 1 open reading frame 127
chr1	109407155	109407803	649	*	Peak_1012	66	.	Intron (ENST00000271308.8/5686, intron 8 of 8)	1	109411870	109412285	416	2	5686	ENST00000477897.1	4482	ENSG00000143106	PSMA5	proteasome subunit alpha 5
chr11	100445916	100446228	313	*	Peak_9873	36	.	Distal Intergenic	11	100687653	100993941	306289	1	143872	ENST00000524892.7	-241425	ENSG00000165895	ARHGAP42	Rho GTPase activating protein 42
chr11	100458567	100458850	284	*	Peak_6715	41	.	Distal Intergenic	11	100687653	100993941	306289	1	143872	ENST00000524892.7	-228803	ENSG00000165895	ARHGAP42	Rho GTPase activating protein 42
chr1	110072127	110072537	411	*	Peak_557	77	.	Promoter (1-2kb)	1	110059994	110070700	10707	2	257	ENST00000369792.4	-1427	ENSG00000156150	ALX3	ALX homeobox 3
chr11	101137399	101137888	490	*	Peak_15548	30	.	Intron (ENST00000632820.1/101054525, intron 3 of 6)	11	101029624	101130524	100901	2	5241	ENST00000325455.9	-6875	ENSG00000082175	PGR	progesterone receptor
chr11	101148175	101148538	364	*	Peak_8626	39	.	Promoter (<=1kb)	11	101148150	101209591	61442	1	101054525	ENST00000531772.1	25	NA	PGR-AS1	PGR antisense RNA 1
chr11	101312262	101312593	332	*	Peak_1195	63	.	Distal Intergenic	11	101453641	101455577	1937	2	7225	ENST00000532184.1	142984	ENSG00000137672	TRPC6	transient receptor potential cation channel subfamily C member 6
chr11	101411476	101411948	473	*	Peak_14456	31	.	Distal Intergenic	11	101453641	101455577	1937	2	7225	ENST00000532184.1	43629	ENSG00000137672	TRPC6	transient receptor potential cation channel subfamily C member 6
chr11	101466434	101466908	475	*	Peak_2036	57	.	Intron (ENST00000344327.7/7225, intron 10 of 12)	11	101453641	101455577	1937	2	7225	ENST00000532184.1	-10857	ENSG00000137672	TRPC6	transient receptor potential cation channel subfamily C member 6
chr11	101577079	101577368	290	*	Peak_9703	36	.	Intron (ENST00000344327.7/7225, intron 1 of 12)	11	101452955	101583503	130549	2	7225	ENST00000348423.8	6135	ENSG00000137672	TRPC6	transient receptor potential cation channel subfamily C member 6
chr1	110166801	110167494	694	*	Peak_5223	46	.	5' UTR	1	110150486	110202202	51717	1	388662	ENST00000331565.4	16315	ENSG00000197106	SLC6A17	solute carrier family 6 member 17
chr11	101705358	101705648	291	*	Peak_3096	51	.	Intron (ENST00000526713.1/7225, intron 1 of 1)	11	101451564	101583928	132365	2	7225	ENST00000344327.7	-121430	ENSG00000137672	TRPC6	transient receptor potential cation channel subfamily C member 6
chr11	101940202	101940754	553	*	Peak_2387	53	.	Intron (ENST00000263468.12/57562, intron 2 of 10)	11	101944375	101998028	53654	1	57562	ENST00000532529.1	-3621	ENSG00000110318	CEP126	centrosomal protein 126
chr11	102492353	102493115	763	*	Peak_6096	43	.	Intron (ENST00000529278.1/102723838, intron 1 of 2)	11	102401925	102470384	68460	2	114908	ENST00000525577.5	-21969	ENSG00000152558	TMEM123	transmembrane protein 123
chr1	110258774	110259035	262	*	Peak_15254	30	.	Intron (ENST00000412512.2/3749, intron 1 of 2)	1	110223830	110229151	5322	1	3749	ENST00000636402.1	34944	ENSG00000116396	KCNC4	potassium voltage-gated channel subfamily C member 4
chr11	102608591	102608985	395	*	Peak_11220	34	.	Promoter (<=1kb)	11	102594688	102607850	13163	2	9313	ENST00000544938.1	-741	ENSG00000137674	MMP20	matrix metallopeptidase 20
chr11	102740225	102740569	345	*	Peak_6597	42	.	Distal Intergenic	11	102746968	102831511	84544	1	100288077	ENST00000371455.7	-6399	ENSG00000255282	WTAPP1	Wilms tumor 1 associated protein pseudogene 1
chr1	110323721	110324396	676	*	Peak_3971	47	.	Intron (ENST00000449169.1/440600, intron 1 of 3)	1	110338506	110346677	8172	1	64783	ENST00000369784.7	-14110	ENSG00000162775	RBM15	RNA binding motif protein 15
chr11	103679502	103679819	318	*	Peak_13213	33	.	Intron (ENST00000533459.1/ENST00000533459.1, intron 4 of 4)	11	103849906	103849980	75	1	100616457	ENST00000578405.1	-170087	ENSG00000264200	MIR4693	microRNA 4693
chr1	110428717	110429061	345	*	Peak_6055	43	.	Intron (ENST00000596890.3/ENST00000596890.3, intron 3 of 3)	1	110413849	110418303	4455	1	101410535	ENST00000608077.1	14868	NA	LAMTOR5-AS1	LAMTOR5 antisense RNA 1
chr11	104355285	104355971	687	*	Peak_2242	54	.	Distal Intergenic	11	103907189	104164379	257191	2	80310	ENST00000302251.9	-190906	ENSG00000170962	PDGFD	platelet derived growth factor D
chr11	104615448	104615942	495	*	Peak_6887	41	.	Distal Intergenic	11	104539931	104609321	69391	2	102723895	ENST00000538641.1	-6127	ENSG00000256422	LINC02552	long intergenic non-protein coding RNA 2552
chr11	104656250	104656497	248	*	Peak_4245	46	.	Distal Intergenic	11	104539931	104609321	69391	2	102723895	ENST00000538641.1	-46929	ENSG00000256422	LINC02552	long intergenic non-protein coding RNA 2552
chr11	10475605	10475849	245	*	Peak_6995	41	.	Intron (ENST00000532250.5/272, intron 3 of 3)	11	10481883	10485021	3139	1	272	ENST00000531227.1	-6034	ENSG00000133805	AMPD3	adenosine monophosphate deaminase 3
chr11	104886982	104887334	353	*	Peak_4246	46	.	3' UTR	11	104886714	104898414	11701	2	100506742	ENST00000508062.1	11080	ENSG00000204403	CASP12	caspase 12 (gene/pseudogene)
chr11	105258056	105258353	298	*	Peak_19666	24	.	Intron (ENST00000649856.1/59082, intron 4 of 7)	11	105137721	105139726	2006	2	59082	ENST00000530950.1	-118330	ENSG00000255501	CARD18	caspase recruitment domain family member 18
chr11	105474822	105475161	340	*	Peak_2307	54	.	Intron (ENST00000649856.1/59082, intron 1 of 7)	11	105137721	105516002	378282	2	59082	ENST00000649856.1	40841	ENSG00000255501	CARD18	caspase recruitment domain family member 18
chr11	10570756	10571160	405	*	Peak_2985	51	.	Promoter (2-3kb)	11	10558363	10568718	10356	2	10894	ENST00000438354.6	-2038	ENSG00000133800	LYVE1	lymphatic vessel endothelial hyaluronan receptor 1
chr1	110581922	110582201	280	*	Peak_4247	46	.	Intron (ENST00000640680.1/3737, intron 2 of 8)	1	110603061	110605571	2511	2	3737	ENST00000640956.1	23370	ENSG00000177301	KCNA2	potassium voltage-gated channel subfamily A member 2
chr11	106200882	106201334	453	*	Peak_15737	30	.	Distal Intergenic	11	106250019	106263232	13214	1	101928535	ENST00000526101.5	-48685	ENSG00000254811	LOC101928535	uncharacterized LOC101928535
chr11	1064394	1064687	294	*	Peak_817	70	.	Distal Intergenic	11	1074875	1110511	35637	1	4583	ENST00000361558.7	-10188	ENSG00000198788	MUC2	mucin 2, oligomeric mucus/gel-forming
chr11	106604907	106605190	284	*	Peak_3844	47	.	Distal Intergenic	11	106251407	106264905	13499	1	101928535	ENST00000525797.1	353500	ENSG00000254811	LOC101928535	uncharacterized LOC101928535
chr11	106758640	106759031	392	*	Peak_10463	35	.	Intron (ENST00000526355.6/2977, intron 6 of 7)	11	106687375	107018151	330777	2	2977	ENST00000347596.2	259120	ENSG00000152402	GUCY1A2	guanylate cyclase 1 soluble subunit alpha 2
chr11	107252586	107252936	351	*	Peak_9269	37	.	Distal Intergenic	11	107348711	107353730	5020	2	143884	ENST00000462890.1	100794	ENSG00000152404	CWF19L2	CWF19 like cell cycle control factor 2
chr11	107257000	107257429	430	*	Peak_3710	47	.	Distal Intergenic	11	107348711	107353730	5020	2	143884	ENST00000462890.1	96301	ENSG00000152404	CWF19L2	CWF19 like cell cycle control factor 2
chr11	10729694	10729929	236	*	Peak_6366	42	.	Distal Intergenic	11	10750987	10779743	28757	1	9646	ENST00000361367.6	-21058	ENSG00000198730	CTR9	CTR9 homolog, Paf1/RNA polymerase II complex component
chr11	107320534	107321051	518	*	Peak_15602	30	.	Distal Intergenic	11	107348711	107353730	5020	2	143884	ENST00000462890.1	32679	ENSG00000152404	CWF19L2	CWF19 like cell cycle control factor 2
chr11	1076893	1077697	805	*	Peak_3711	47	.	Promoter (2-3kb)	11	1074875	1110511	35637	1	4583	ENST00000361558.7	2018	ENSG00000198788	MUC2	mucin 2, oligomeric mucus/gel-forming
chr11	107758615	107759281	667	*	Peak_13587	32	.	Distal Intergenic	11	107707378	107719693	12316	2	6588	ENST00000531293.1	-38922	ENSG00000170290	SLN	sarcolipin
chr11	1093076	1094282	1207	*	Peak_1823	58	.	Exon (ENST00000361558.7/4583, exon 29 of 49)	11	1102455	1103456	1002	1	4583	ENST00000616479.1	-8173	ENSG00000198788	MUC2	mucin 2, oligomeric mucus/gel-forming
chr11	1095077	1095660	584	*	Peak_15	297	.	Exon (ENST00000361558.7/4583, exon 30 of 49)	11	1102455	1103456	1002	1	4583	ENST00000616479.1	-6795	ENSG00000198788	MUC2	mucin 2, oligomeric mucus/gel-forming
chr11	10979162	10979401	240	*	Peak_6378	42	.	Distal Intergenic	11	10865261	10906802	41542	1	729013	ENST00000530344.1	113901	ENSG00000247271	ZBED5-AS1	ZBED5 antisense RNA 1
chr11	1103483	1103743	261	*	Peak_9765	36	.	Promoter (1-2kb)	11	1102455	1103456	1002	1	4583	ENST00000616479.1	1028	ENSG00000198788	MUC2	mucin 2, oligomeric mucus/gel-forming
chr11	11044361	11045292	932	*	Peak_5849	44	.	Intron (ENST00000647635.1/ENST00000647635.1, intron 1 of 6)	11	10865261	10906802	41542	1	729013	ENST00000530344.1	179100	ENSG00000247271	ZBED5-AS1	ZBED5 antisense RNA 1
chr1	111202174	111202437	264	*	Peak_18259	26	.	Promoter (1-2kb)	1	111200771	111243439	42669	1	1117	ENST00000445067.6	1403	ENSG00000064886	CHI3L2	chitinase 3 like 2
chr11	11254610	11254981	372	*	Peak_14353	31	.	Distal Intergenic	11	11351942	11353357	1416	2	283106	ENST00000528848.2	98376	ENSG00000254598	CSNK2A3	casein kinase 2 alpha 3
chr11	11268268	11268596	329	*	Peak_3301	50	.	Downstream (2-3kb)	11	11351942	11353357	1416	2	283106	ENST00000528848.2	84761	ENSG00000254598	CSNK2A3	casein kinase 2 alpha 3
chr11	1148495	1149662	1168	*	Peak_1705	59	.	Distal Intergenic	11	1157953	1201138	43186	1	4586	ENST00000621226.2	-8291	ENSG00000215182	MUC5AC	mucin 5AC, oligomeric mucus/gel-forming
chr11	11530930	11531304	375	*	Peak_12894	34	.	Intron (ENST00000227756.4/374378, intron 1 of 10)	11	11475177	11621758	146582	2	374378	ENST00000526064.1	90454	ENSG00000110328	GALNT18	polypeptide N-acetylgalactosaminyltransferase 18
chr11	11560715	11561161	447	*	Peak_244	101	.	Intron (ENST00000227756.4/374378, intron 1 of 10)	11	11475177	11621758	146582	2	374378	ENST00000526064.1	60597	ENSG00000110328	GALNT18	polypeptide N-acetylgalactosaminyltransferase 18
chr11	11671772	11672147	376	*	Peak_13588	32	.	Distal Intergenic	11	11656651	11656722	72	2	100423026	ENST00000577899.1	-15050	ENSG00000266645	MIR4299	microRNA 4299
chr11	11702802	11703160	359	*	Peak_2829	52	.	Distal Intergenic	11	11656651	11656722	72	2	100423026	ENST00000577899.1	-46080	ENSG00000266645	MIR4299	microRNA 4299
chr11	11740014	11740250	237	*	Peak_3404	49	.	Distal Intergenic	11	11783135	11783222	88	2	102465870	ENST00000616510.1	42972	ENSG00000278529	MIR8070	microRNA 8070
chr11	11769293	11769538	246	*	Peak_10989	35	.	Distal Intergenic	11	11783135	11783222	88	2	102465870	ENST00000616510.1	13684	ENSG00000278529	MIR8070	microRNA 8070
chr11	1177139	1177628	490	*	Peak_10464	35	.	Exon (ENST00000621226.2/4586, exon 23 of 49)	11	1157953	1201138	43186	1	4586	ENST00000621226.2	19186	ENSG00000215182	MUC5AC	mucin 5AC, oligomeric mucus/gel-forming
chr11	118165704	118165969	266	*	Peak_4251	46	.	3' UTR	11	118161951	118176673	14723	2	6327	ENST00000278947.5	10704	ENSG00000149575	SCN2B	sodium voltage-gated channel beta subunit 2
chr1	112036415	112036709	295	*	Peak_4253	46	.	Distal Intergenic	1	111990536	111998842	8307	1	643355	ENST00000438293.1	45879	ENSG00000231437	LINC01750	long intergenic non-protein coding RNA 1750
chr1	112248189	112248549	361	*	Peak_5733	44	.	Intron (ENST00000427290.1/ENST00000427290.1, intron 1 of 1)	1	112396181	112461164	64984	1	55917	ENST00000271277.10	-147632	ENSG00000143079	CTTNBP2NL	CTTNBP2 N-terminal like
chr11	12355012	12355381	370	*	Peak_2801	53	.	Intron (ENST00000646065.1/9645, intron 34 of 34)	11	12377185	12530801	153617	1	55742	ENST00000334956.13	-21804	ENSG00000197702	PARVA	parvin alpha
chr11	12365879	12366169	291	*	Peak_549	77	.	Distal Intergenic	11	12377185	12530801	153617	1	55742	ENST00000334956.13	-11016	ENSG00000197702	PARVA	parvin alpha
chr11	125087801	125088165	365	*	Peak_11382	34	.	3' UTR	11	125083848	125090312	6465	1	219855	ENST00000354617.5	3953	ENSG00000134955	SLC37A2	solute carrier family 37 member 2
chr1	112744288	112744746	459	*	Peak_6889	41	.	Distal Intergenic	1	112720577	112727235	6659	1	284467	ENST00000361886.3	23711	ENSG00000184599	TAFA3	TAFA chemokine like family member 3
chr11	128855572	128855801	230	*	Peak_4255	46	.	Intron (ENST00000392665.6/3758, intron 1 of 1)	11	128839826	128867281	27456	2	3758	ENST00000324003.3	11480	ENSG00000151704	KCNJ1	potassium voltage-gated channel subfamily J member 1
chr1	11306794	11307294	501	*	Peak_7321	40	.	Distal Intergenic	1	11273934	11296049	22116	1	29914	ENST00000483738.1	32860	ENSG00000120942	UBIAD1	UbiA prenyltransferase domain containing 1
chr11	13082426	13082691	266	*	Peak_1853	58	.	Intron (ENST00000531136.1/ENST00000531136.1, intron 1 of 1)	11	13009577	13012106	2530	1	644943	ENST00000529419.2	72849	ENSG00000189431	RASSF10	Ras association domain family member 10
chr1	113151473	113151898	426	*	Peak_13444	33	.	Distal Intergenic	1	113103201	113124997	21797	1	9860	ENST00000466161.1	48272	ENSG00000198799	LRIG2	leucine rich repeats and immunoglobulin like domains 2
chr11	13190485	13190803	319	*	Peak_3834	47	.	Distal Intergenic	11	13276652	13354377	77726	1	406	ENST00000529050.5	-85849	ENSG00000133794	ARNTL	aryl hydrocarbon receptor nuclear translocator like
chr1	113201288	113201670	383	*	Peak_11385	34	.	Distal Intergenic	1	113103201	113124997	21797	1	9860	ENST00000466161.1	98087	ENSG00000198799	LRIG2	leucine rich repeats and immunoglobulin like domains 2
chr1	113287767	113288037	271	*	Peak_5292	46	.	Distal Intergenic	1	113390749	113682434	291686	1	260425	ENST00000369617.8	-102712	ENSG00000081026	MAGI3	membrane associated guanylate kinase, WW and PDZ domain containing 3
chr11	1343139	1343435	297	*	Peak_10468	35	.	Distal Intergenic	11	1309769	1310707	939	1	255512	ENST00000530897.1	33370	ENSG00000255153	TOLLIP-AS1	TOLLIP antisense RNA 1 (head to head)
chr1	11357337	11357670	334	*	Peak_18382	26	.	Distal Intergenic	1	11273934	11296049	22116	1	29914	ENST00000483738.1	83403	ENSG00000120942	UBIAD1	UbiA prenyltransferase domain containing 1
chr11	13802250	13802665	416	*	Peak_17005	28	.	Intron (ENST00000648524.1/105376562, intron 3 of 6)	11	13785390	13848002	62613	1	105376562	ENST00000531749.1	16860	ENSG00000255411	LINC02548	long intergenic non-protein coding RNA 2548
chr11	13889306	13889649	344	*	Peak_17220	28	.	Distal Intergenic	11	13844862	13870616	25755	2	105376561	ENST00000525381.1	-18690	ENSG00000254930	LINC02545	long intergenic non-protein coding RNA 2545
chr11	1389052	1389718	667	*	Peak_1374	60	.	Promoter (<=1kb)	11	1389899	1462685	72787	1	9024	ENST00000308219.13	-181	ENSG00000174672	BRSK2	BR serine/threonine kinase 2
chr1	113992347	113992736	390	*	Peak_10154	36	.	Intron (ENST00000633022.1/56944, intron 1 of 1)	1	113980500	114035572	55073	1	56944	ENST00000633022.1	11847	ENSG00000116774	OLFML3	olfactomedin like 3
chr1	113993312	113993958	647	*	Peak_10469	35	.	Intron (ENST00000633022.1/56944, intron 1 of 1)	1	113980500	114035572	55073	1	56944	ENST00000633022.1	12812	ENSG00000116774	OLFML3	olfactomedin like 3
chr1	114005006	114005501	496	*	Peak_1824	58	.	Intron (ENST00000633022.1/56944, intron 1 of 1)	1	113980500	114035572	55073	1	56944	ENST00000633022.1	24506	ENSG00000116774	OLFML3	olfactomedin like 3
chr11	14025354	14025992	639	*	Peak_8518	39	.	Intron (ENST00000576479.3/10418, intron 2 of 15)	11	13962689	14267884	305196	1	10418	ENST00000576479.3	62665	ENSG00000262655	SPON1	spondin 1
chr11	1409133	1409763	631	*	Peak_9721	36	.	Promoter (<=1kb)	11	1409400	1442516	33117	1	9024	ENST00000528596.5	0	ENSG00000174672	BRSK2	BR serine/threonine kinase 2
chr1	11410543	11411033	491	*	Peak_7087	41	.	Distal Intergenic	1	11479166	11481960	2795	1	57540	ENST00000423056.2	-68133	ENSG00000204624	DISP3	dispatched RND transporter family member 3
chr1	11412339	11413101	763	*	Peak_17316	28	.	Distal Intergenic	1	11479166	11481960	2795	1	57540	ENST00000423056.2	-66065	ENSG00000204624	DISP3	dispatched RND transporter family member 3
chr1	114128446	114128694	249	*	Peak_4259	46	.	Intron (ENST00000610121.5/148281, intron 3 of 6)	1	114089292	114152440	63149	2	148281	ENST00000607941.5	23746	ENSG00000134207	SYT6	synaptotagmin 6
chr1	114175990	114176236	247	*	Peak_7469	40	.	Distal Intergenic	1	114089327	114153919	64593	2	148281	ENST00000610222.2	-22071	ENSG00000134207	SYT6	synaptotagmin 6
chr11	1420672	1421049	378	*	Peak_8215	40	.	Intron (ENST00000308219.13/9024, intron 1 of 19)	11	1411152	1461745	50594	1	9024	ENST00000382179.5	9520	ENSG00000174672	BRSK2	BR serine/threonine kinase 2
chr11	1422053	1422605	553	*	Peak_3236	50	.	Intron (ENST00000308219.13/9024, intron 1 of 19)	11	1411152	1461745	50594	1	9024	ENST00000382179.5	10901	ENSG00000174672	BRSK2	BR serine/threonine kinase 2
chr11	14239593	14239883	291	*	Peak_6598	42	.	Intron (ENST00000576479.3/10418, intron 6 of 15)	11	14262447	14265999	3553	1	10418	ENST00000591785.1	-22564	ENSG00000262655	SPON1	spondin 1
chr11	1423996	1424635	640	*	Peak_15258	30	.	Intron (ENST00000308219.13/9024, intron 1 of 19)	11	1411152	1461745	50594	1	9024	ENST00000382179.5	12844	ENSG00000174672	BRSK2	BR serine/threonine kinase 2
chr11	14242078	14242543	466	*	Peak_1227	62	.	Intron (ENST00000576479.3/10418, intron 6 of 15)	11	14262447	14265999	3553	1	10418	ENST00000591785.1	-19904	ENSG00000262655	SPON1	spondin 1
chr11	14244546	14244988	443	*	Peak_14928	30	.	Intron (ENST00000576479.3/10418, intron 7 of 15)	11	14262447	14265999	3553	1	10418	ENST00000591785.1	-17459	ENSG00000262655	SPON1	spondin 1
chr1	114354879	114355753	875	*	Peak_14386	31	.	Exon (ENST00000604963.1/ENST00000604963.1, exon 2 of 2)	1	114397608	114399609	2002	2	51592	ENST00000478032.1	43856	ENSG00000197323	TRIM33	tripartite motif containing 33
chr11	14558750	14559117	368	*	Peak_9082	38	.	Intron (ENST00000418988.2/5682, intron 2 of 10)	11	14504876	14520696	15821	2	5682	ENST00000396394.6	-38054	ENSG00000129084	PSMA1	proteasome subunit alpha 1
chr1	114801308	114801876	569	*	Peak_10472	35	.	Distal Intergenic	1	114779107	114780685	1579	2	80143	ENST00000466657.1	-20623	ENSG00000052723	SIKE1	suppressor of IKBKE 1
chr11	14844094	14844544	451	*	Peak_3650	47	.	Intron (ENST00000282096.8/5140, intron 12 of 15)	11	14878012	14885841	7830	2	120227	ENST00000525015.1	41297	ENSG00000186104	CYP2R1	cytochrome P450 family 2 subfamily R member 1
chr11	14851971	14852297	327	*	Peak_8672	39	.	Intron (ENST00000282096.8/5140, intron 12 of 15)	11	14878012	14885841	7830	2	120227	ENST00000525015.1	33544	ENSG00000186104	CYP2R1	cytochrome P450 family 2 subfamily R member 1
chr1	11490740	11491090	351	*	Peak_11388	34	.	Intron (ENST00000294484.6/57540, intron 1 of 20)	1	11479238	11537584	58347	1	57540	ENST00000294484.6	11502	ENSG00000204624	DISP3	dispatched RND transporter family member 3
chr1	11493889	11494249	361	*	Peak_10473	35	.	Intron (ENST00000294484.6/57540, intron 1 of 20)	1	11479238	11537584	58347	1	57540	ENST00000294484.6	14651	ENSG00000204624	DISP3	dispatched RND transporter family member 3
chr1	11495170	11495467	298	*	Peak_16269	28	.	Intron (ENST00000294484.6/57540, intron 1 of 20)	1	11479238	11537584	58347	1	57540	ENST00000294484.6	15932	ENSG00000204624	DISP3	dispatched RND transporter family member 3
chr11	14952958	14953863	906	*	Peak_386	87	.	Intron (ENST00000523376.5/797, intron 5 of 9)	11	14966671	14970016	3346	2	796	ENST00000494746.1	16153	ENSG00000110680	CALCA	calcitonin related polypeptide alpha
chr11	15026784	15027115	332	*	Peak_6003	44	.	Intron (ENST00000523376.5/797, intron 6 of 9)	11	15073562	15078632	5071	1	797	ENST00000324229.10	-46447	ENSG00000175868	CALCB	calcitonin related polypeptide beta
chr11	15070576	15070872	297	*	Peak_14460	31	.	Promoter (2-3kb)	11	15073562	15078632	5071	1	797	ENST00000324229.10	-2690	ENSG00000175868	CALCB	calcitonin related polypeptide beta
chr11	15073345	15073661	317	*	Peak_7236	41	.	Promoter (<=1kb)	11	15073562	15078632	5071	1	797	ENST00000324229.10	0	ENSG00000175868	CALCB	calcitonin related polypeptide beta
chr11	15097793	15098477	685	*	Peak_9330	37	.	Distal Intergenic	11	15112424	15247208	134785	1	387755	ENST00000379554.7	-13947	ENSG00000188487	INSC	INSC spindle orientation adaptor protein
chr1	11532084	11532365	282	*	Peak_9161	38	.	Promoter (1-2kb)	1	11533676	11537225	3550	1	57540	ENST00000304391.6	-1311	ENSG00000204624	DISP3	dispatched RND transporter family member 3
chr11	15333296	15333785	490	*	Peak_13493	33	.	Distal Intergenic	11	15235145	15246318	11174	1	387755	ENST00000526102.1	98151	ENSG00000188487	INSC	INSC spindle orientation adaptor protein
chr11	15346209	15346439	231	*	Peak_8491	39	.	Distal Intergenic	11	15235145	15246318	11174	1	387755	ENST00000526102.1	111064	ENSG00000188487	INSC	INSC spindle orientation adaptor protein
chr11	15439151	15439443	293	*	Peak_13166	33	.	Distal Intergenic	11	15235145	15246318	11174	1	387755	ENST00000526102.1	204006	ENSG00000188487	INSC	INSC spindle orientation adaptor protein
chr11	15708113	15708506	394	*	Peak_8931	38	.	Intron (ENST00000524613.1/ENST00000524613.1, intron 4 of 8)	11	15643885	15705368	61484	1	102724957	ENST00000532242.1	64228	ENSG00000254695	LOC102724957	uncharacterized LOC102724957
chr11	15952606	15953169	564	*	Peak_894	67	.	Distal Intergenic	11	15969533	15969621	89	2	102464826	ENST00000352083.7	16452	ENSG00000284094	MIR6073	microRNA 6073
chr11	16140828	16141181	354	*	Peak_9884	36	.	Intron (ENST00000316399.10/55553, intron 5 of 14)	11	16049782	16111869	62088	2	55553	ENST00000524650.1	-28959	ENSG00000110693	SOX6	SRY-box 6
chr1	116211246	116211804	559	*	Peak_8673	39	.	Distal Intergenic	1	116123873	116128247	4375	1	126868	ENST00000464946.1	87373	ENSG00000173212	MAB21L3	mab-21 like 3
chr11	16211648	16211950	303	*	Peak_3810	47	.	Intron (ENST00000316399.10/55553, intron 3 of 14)	11	16186781	16252536	65756	2	55553	ENST00000531297.1	40586	ENSG00000110693	SOX6	SRY-box 6
chr11	16248384	16248906	523	*	Peak_1890	58	.	Intron (ENST00000316399.10/55553, intron 2 of 14)	11	16186781	16252536	65756	2	55553	ENST00000531297.1	3630	ENSG00000110693	SOX6	SRY-box 6
chr1	11627702	11628004	303	*	Peak_15782	29	.	Intron (ENST00000642131.1/ENST00000642131.1, intron 1 of 1)	1	11609531	11613355	3825	1	101929181	ENST00000453135.1	18171	ENSG00000235643	LINC01647	long intergenic non-protein coding RNA 1647
chr11	16678804	16679226	423	*	Peak_2135	55	.	Intron (ENST00000527893.5/10944, intron 2 of 3)	11	16738401	16756223	17823	1	10944	ENST00000228136.8	-59175	ENSG00000110696	C11orf58	chromosome 11 open reading frame 58
chr11	16685604	16686023	420	*	Peak_5948	44	.	Intron (ENST00000527893.5/10944, intron 2 of 3)	11	16738401	16756223	17823	1	10944	ENST00000228136.8	-52378	ENSG00000110696	C11orf58	chromosome 11 open reading frame 58
chr11	1669428	1670271	844	*	Peak_293	95	.	Distal Intergenic	11	1665597	1667856	2260	1	387742	ENST00000382167.2	3831	ENSG00000205866	FAM99A	family with sequence similarity 99 member A
chr1	116713662	116714122	461	*	Peak_15066	30	.	Exon (ENST00000419696.1/ENST00000419696.1, exon 1 of 1)	1	116694112	116706603	12492	1	388667	ENST00000624685.1	19550	ENSG00000203864	C1orf137	chromosome 1 open reading frame 137 (putative)
chr1	116738111	116738461	351	*	Peak_9515	37	.	Distal Intergenic	1	116754385	116769228	14844	1	914	ENST00000369478.3	-15924	ENSG00000116824	CD2	CD2 molecule
chr1	11674533	11674798	266	*	Peak_13320	33	.	3' UTR	1	11668696	11674030	5335	1	26270	ENST00000449067.1	5837	ENSG00000116663	FBXO6	F-box protein 6
chr1	11686047	11686404	358	*	Peak_8240	40	.	Intron (ENST00000235310.7/10459, intron 1 of 10)	1	11674481	11681214	6734	2	10459	ENST00000376692.8	-4833	ENSG00000116670	MAD2L2	mitotic arrest deficient 2 like 2
chr11	1730273	1730802	530	*	Peak_8202	40	.	Downstream (1-2kb)	11	1735213	1749102	13890	2	402778	ENST00000482459.1	18300	ENSG00000244242	IFITM10	interferon induced transmembrane protein 10
chr11	17412921	17413310	390	*	Peak_6477	42	.	Promoter (<=1kb)	11	17410246	17413536	3291	2	6833	ENST00000530147.5	226	ENSG00000006071	ABCC8	ATP binding cassette subfamily C member 8
chr11	17516416	17516743	328	*	Peak_3961	47	.	Promoter (<=1kb)	11	17493965	17516622	22658	2	10083	ENST00000529563.5	0	ENSG00000006611	USH1C	USH1 protein network component harmonin
chr11	1754011	1754353	343	*	Peak_2347	54	.	Promoter (<=1kb)	11	1735152	1753874	18723	2	402778	ENST00000636579.1	-137	ENSG00000244242	IFITM10	interferon induced transmembrane protein 10
chr11	17572792	17573653	862	*	Peak_312	93	.	Exon (ENST00000399391.6/340990, exon 18 of 55)	11	17578264	17638934	60671	1	340990	ENST00000342528.2	-4611	ENSG00000188162	OTOG	otogelin
chr11	1757788	1758065	278	*	Peak_5623	45	.	Promoter (<=1kb)	11	1753140	1758033	4894	2	1509	ENST00000637158.1	0	ENSG00000117984	CTSD	cathepsin D
chr1	117599992	117600313	322	*	Peak_14462	31	.	Intron (ENST00000440801.5/100996263, intron 2 of 2)	1	117604624	117605685	1062	2	100996263	ENST00000456126.1	5372	ENSG00000236866	LOC100996263	uncharacterized LOC100996263
chr1	118050913	118051190	278	*	Peak_983	67	.	Intron (ENST00000336338.9/200162, intron 20 of 48)	1	118025264	118040767	15504	2	200162	ENST00000470550.1	-10146	ENSG00000155761	SPAG17	sperm associated antigen 17
chr11	18178992	18179406	415	*	Peak_13903	32	.	Intron (ENST00000527671.1/ENST00000527671.1, intron 1 of 1)	11	18172837	18174280	1444	1	117196	ENST00000314254.3	6155	ENSG00000179817	MRGPRX4	MAS related GPR family member X4
chr11	18221350	18222135	786	*	Peak_8363	39	.	Distal Intergenic	11	18209208	18214562	5355	1	494141	ENST00000527059.1	12142	ENSG00000189332	LOC494141	solute carrier family 25 member 51 pseudogene
chr11	18225008	18225393	386	*	Peak_2866	52	.	Distal Intergenic	11	18231349	18236893	5545	2	6291	ENST00000278222.6	11500	ENSG00000148965	SAA4	serum amyloid A4, constitutive
chr11	18851589	18851886	298	*	Peak_18158	26	.	Distal Intergenic	11	18727930	18792721	64792	2	84867	ENST00000396170.5	-58868	ENSG00000110786	PTPN5	protein tyrosine phosphatase non-receptor type 5
chr1	118996803	118997109	307	*	Peak_7476	40	.	Distal Intergenic	1	119000344	119001392	1049	2	105378933	ENST00000439394.1	4283	ENSG00000226172	LOC105378933	uncharacterized LOC105378933
chr11	19005780	19006035	256	*	Peak_2410	53	.	Distal Intergenic	11	19054455	19060681	6227	2	117194	ENST00000329773.2	54646	ENSG00000183695	MRGPRX2	MAS related GPR family member X2
chr11	19353025	19353308	284	*	Peak_13854	32	.	Promoter (2-3kb)	11	19350724	20121598	770875	1	89797	ENST00000360655.8	2301	ENSG00000166833	NAV2	neuron navigator 2
chr1	119557900	119558157	258	*	Peak_2411	53	.	Distal Intergenic	1	119597702	119599271	1570	2	644242	ENST00000562811.1	41114	ENSG00000260941	LINC00622	long intergenic non-protein coding RNA 622
chr11	19628597	19629337	741	*	Peak_18199	26	.	Intron (ENST00000360655.8/89797, intron 1 of 37)	11	19575310	19575372	63	1	100616118	ENST00000578325.1	53287	ENSG00000265210	MIR4486	microRNA 4486
chr1	119780092	119780529	438	*	Peak_8932	38	.	Distal Intergenic	1	119748384	119768905	20522	2	3158	ENST00000544913.2	-11187	ENSG00000134240	HMGCS2	3-hydroxy-3-methylglutaryl-CoA synthase 2
chr1	119883573	119884287	715	*	Peak_15263	30	.	Distal Intergenic	1	119893533	119896495	2963	2	11085	ENST00000369400.1	12208	ENSG00000134249	ADAM30	ADAM metallopeptidase domain 30
chr11	19982644	19983115	472	*	Peak_7091	41	.	Intron (ENST00000360655.8/89797, intron 10 of 37)	11	20022556	20118603	96048	1	89797	ENST00000533917.5	-39441	ENSG00000166833	NAV2	neuron navigator 2
chr11	20596018	20596340	323	*	Peak_4261	46	.	Distal Intergenic	11	20599400	20659285	59886	1	9152	ENST00000525748.5	-3060	ENSG00000165970	SLC6A5	solute carrier family 6 member 5
chr1	12063929	12064425	497	*	Peak_3742	47	.	Promoter (<=1kb)	1	12063470	12143117	79648	1	943	ENST00000514649.5	459	ENSG00000120949	TNFRSF8	TNF receptor superfamily member 8
chr1	12071108	12071727	620	*	Peak_1214	63	.	Intron (ENST00000417814.3/943, intron 1 of 13)	1	12063470	12143117	79648	1	943	ENST00000514649.5	7638	ENSG00000120949	TNFRSF8	TNF receptor superfamily member 8
chr1	12075450	12075686	237	*	Peak_9331	37	.	Intron (ENST00000417814.3/943, intron 1 of 13)	1	12063470	12143117	79648	1	943	ENST00000514649.5	11980	ENSG00000120949	TNFRSF8	TNF receptor superfamily member 8
chr11	20954512	20954847	336	*	Peak_8674	39	.	Intron (ENST00000325319.9/4745, intron 10 of 18)	11	20935696	21229388	293693	1	4745	ENST00000530672.1	18816	ENSG00000165973	NELL1	neural EGFL like 1
chr11	2105259	2105488	230	*	Peak_12911	34	.	Distal Intergenic	11	2134134	2134209	76	2	619552	ENST00000385070.3	28721	ENSG00000207805	MIR483	microRNA 483
chr11	2139948	2140324	377	*	Peak_989	67	.	Promoter (<=1kb)	11	2140501	2148642	8142	1	51214	ENST00000445504.2	-177	ENSG00000099869	IGF2-AS	IGF2 antisense RNA
chr11	22573816	22574088	273	*	Peak_8279	40	.	Distal Intergenic	11	22625642	22749190	123549	1	2620	ENST00000528582.5	-51554	ENSG00000148935	GAS2	growth arrest specific 2
chr11	2259880	2260197	318	*	Peak_705	73	.	Distal Intergenic	11	2268495	2270952	2458	2	430	ENST00000331289.4	10755	ENSG00000183734	ASCL2	achaete-scute family bHLH transcription factor 2
chr11	22848497	22848757	261	*	Peak_20084	22	.	Intron (ENST00000525963.5/ENST00000525963.5, intron 3 of 3)	11	22847379	22858152	10774	2	100500938	ENST00000529466.1	9395	ENSG00000255359	CCDC179	coiled-coil domain containing 179
chr11	2350296	2350674	379	*	Peak_12912	34	.	Intron (ENST00000427151.1/101927682, intron 1 of 2)	11	2376177	2395900	19724	1	975	ENST00000475945.6	-25503	ENSG00000110651	CD81	CD81 molecule
chr11	2363939	2364232	294	*	Peak_10477	35	.	Intron (ENST00000427151.1/101927682, intron 1 of 2)	11	2376177	2395900	19724	1	975	ENST00000475945.6	-11945	ENSG00000110651	CD81	CD81 molecule
chr11	23827238	23827727	490	*	Peak_4262	46	.	Distal Intergenic	11	23419105	23419190	86	2	102465860	ENST00000620877.1	-408048	ENSG00000275868	MIR8054	microRNA 8054
chr11	2436362	2437067	706	*	Peak_5560	45	.	Distal Intergenic	11	2444684	2572906	128223	1	3784	ENST00000496887.6	-7617	ENSG00000053918	KCNQ1	potassium voltage-gated channel subfamily Q member 1
chr11	24444585	24444841	257	*	Peak_6717	41	.	Distal Intergenic	11	24496970	24893337	396368	1	338645	ENST00000531187.5	-52129	ENSG00000187398	LUZP2	leucine zipper protein 2
chr11	24929259	24929626	368	*	Peak_11400	34	.	Intron (ENST00000336930.10/338645, intron 7 of 11)	11	24729140	25082631	353492	1	338645	ENST00000620308.1	200119	ENSG00000187398	LUZP2	leucine zipper protein 2
chr11	25214238	25214469	232	*	Peak_11402	34	.	Distal Intergenic	11	24729140	25082631	353492	1	338645	ENST00000620308.1	485098	ENSG00000187398	LUZP2	leucine zipper protein 2
chr11	25782823	25783098	276	*	Peak_17870	26	.	Distal Intergenic	11	26189123	26208347	19225	1	63982	ENST00000531798.1	-406025	ENSG00000134343	ANO3	anoctamin 3
chr11	26458846	26459141	296	*	Peak_16273	28	.	Intron (ENST00000525139.5/63982, intron 3 of 26)	11	26473902	26660820	186919	1	63982	ENST00000531568.1	-14761	ENSG00000134343	ANO3	anoctamin 3
chr11	26585320	26585640	321	*	Peak_17666	27	.	Intron (ENST00000525139.5/63982, intron 14 of 26)	11	26560305	26572233	11929	2	143662	ENST00000529533.5	-13087	ENSG00000169550	MUC15	mucin 15, cell surface associated
chr11	2663332	2663561	230	*	Peak_9240	37	.	Exon (ENST00000597346.1/10984, exon 1 of 1)	11	2608328	2699994	91667	2	10984	ENST00000597346.1	36433	ENSG00000269821	KCNQ1OT1	KCNQ1 opposite strand/antisense transcript 1
chr11	2665811	2666085	275	*	Peak_10478	35	.	Exon (ENST00000597346.1/10984, exon 1 of 1)	11	2608328	2699994	91667	2	10984	ENST00000597346.1	33909	ENSG00000269821	KCNQ1OT1	KCNQ1 opposite strand/antisense transcript 1
chr11	26832056	26832545	490	*	Peak_17317	28	.	Distal Intergenic	11	26670813	26723427	52615	2	159963	ENST00000527405.5	-108629	ENSG00000148942	SLC5A12	solute carrier family 5 member 12
chr11	26940551	26941125	575	*	Peak_17081	28	.	Distal Intergenic	11	26994184	26996121	1938	1	387758	ENST00000318627.3	-53059	ENSG00000176971	FIBIN	fin bud initiation factor homolog
chr11	27132010	27132310	301	*	Peak_9332	37	.	Intron (ENST00000526061.5/103695435, intron 3 of 3)	11	27055426	27057433	2008	1	8424	ENST00000534323.1	76584	ENSG00000129151	BBOX1	gamma-butyrobetaine hydroxylase 1
chr11	27228176	27228549	374	*	Peak_7093	41	.	Distal Intergenic	11	27062983	27220113	157131	2	103695435	ENST00000525302.5	-8063	ENSG00000254560	BBOX1-AS1	BBOX1 antisense RNA 1
chr11	2753573	2753828	256	*	Peak_9195	38	.	Intron (ENST00000155840.10/3784, intron 11 of 15)	11	2777575	2848293	70719	1	3784	ENST00000526095.2	-23747	ENSG00000053918	KCNQ1	potassium voltage-gated channel subfamily Q member 1
chr11	27560573	27560846	274	*	Peak_6693	41	.	Intron (ENST00000530686.5/497258, intron 1 of 5)	11	27514970	27515047	78	2	102465881	ENST00000612745.1	-45526	ENSG00000278483	MIR8087	microRNA 8087
chr11	27584397	27584626	230	*	Peak_11404	34	.	Intron (ENST00000530686.5/497258, intron 2 of 5)	11	27617626	27634522	16897	2	101410541	ENST00000527083.5	49896	ENSG00000254934	LINC00678	long intergenic non-protein coding RNA 678
chr11	29009717	29010170	454	*	Peak_9241	37	.	Intron (ENST00000513853.5/ENST00000513853.5, intron 2 of 3)	11	28477481	28477548	68	2	102466876	ENST00000618032.1	-532169	ENSG00000273912	MIR8068	microRNA 8068
chr11	29571879	29572230	352	*	Peak_2414	53	.	Intron (ENST00000525097.1/ENST00000525097.1, intron 1 of 3)	11	29594918	29630664	35747	1	105376606	ENST00000527492.5	-22688	ENSG00000255117	LINC02546	long intergenic non-protein coding RNA 2546
chr11	29655439	29655809	371	*	Peak_1378	60	.	Distal Intergenic	11	29618802	29630664	11863	1	105376606	ENST00000528119.1	36637	ENSG00000255117	LINC02546	long intergenic non-protein coding RNA 2546
chr11	29716087	29716421	335	*	Peak_4265	46	.	Intron (ENST00000530249.1/ENST00000530249.1, intron 1 of 2)	11	29618802	29630664	11863	1	105376606	ENST00000528119.1	97285	ENSG00000255117	LINC02546	long intergenic non-protein coding RNA 2546
chr11	30017304	30017643	340	*	Peak_4266	46	.	Promoter (<=1kb)	11	30009741	30017023	7283	2	3739	ENST00000328224.6	-281	ENSG00000182255	KCNA4	potassium voltage-gated channel subfamily A member 4
chr11	30133549	30133778	230	*	Peak_13670	32	.	Distal Intergenic	11	30231016	30235039	4024	1	2488	ENST00000254122.7	-97238	ENSG00000131808	FSHB	follicle stimulating hormone subunit beta
chr11	30251421	30251684	264	*	Peak_13414	33	.	Distal Intergenic	11	30231873	30234748	2876	1	2488	ENST00000533718.1	19548	ENSG00000131808	FSHB	follicle stimulating hormone subunit beta
chr11	3041576	3041873	298	*	Peak_7412	40	.	Promoter (1-2kb)	11	3038131	3040088	1958	2	833	ENST00000465207.5	-1488	ENSG00000110619	CARS	cysteinyl-tRNA synthetase
chr11	30874537	30874944	408	*	Peak_7482	40	.	Intron (ENST00000444572.6/341019, intron 16 of 20)	11	30863603	30906705	43103	2	341019	ENST00000303697.8	31761	ENSG00000170959	DCDC1	doublecortin domain containing 1
chr11	31186716	31186971	256	*	Peak_11407	34	.	Intron (ENST00000597505.5/341019, intron 7 of 35)	11	31155903	31241616	85714	2	341019	ENST00000534021.1	54645	ENSG00000170959	DCDC1	doublecortin domain containing 1
chr11	31929898	31930320	423	*	Peak_3288	50	.	Intron (ENST00000530348.5/5954, intron 1 of 3)	11	31826347	31829311	2965	1	103157000	ENST00000630360.1	103551	ENSG00000281880	PAUPAR	PAX6 upstream antisense RNA
chr11	32221632	32221957	326	*	Peak_18227	26	.	Intron (ENST00000419556.2/ENST00000419556.2, intron 2 of 2)	11	32101995	32105531	3537	1	5954	ENST00000531345.1	119637	ENSG00000049449	RCN1	reticulocalbin 1
chr1	13231497	13231845	349	*	Peak_10479	35	.	Distal Intergenic	1	13222705	13226106	3402	2	391003	ENST00000624297.2	-5391	ENSG00000279804	PRAMEF18	PRAME family member 18
chr1	13245819	13246141	323	*	Peak_10480	35	.	Exon (ENST00000504262.1/ENST00000504262.1, exon 1 of 3)	1	13254212	13263314	9103	1	343068	ENST00000622421.2	-8071	ENSG00000270601	PRAMEF5	PRAME family member 5
chr11	32824673	32825010	338	*	Peak_5630	45	.	Distal Intergenic	11	32829943	32858123	28181	1	79056	ENST00000257836.3	-4933	ENSG00000135378	PRRG4	proline rich and Gla domain 4
chr11	33499615	33499912	298	*	Peak_1380	60	.	Intron (ENST00000526400.6/25758, intron 1 of 14)	11	33542275	33674102	131828	1	25758	ENST00000321505.8	-42363	ENSG00000110427	KIAA1549L	KIAA1549 like
chr11	33660562	33660992	431	*	Peak_10481	35	.	Exon (ENST00000321505.8/25758, exon 19 of 20)	11	33698457	33700397	1941	2	100131378	ENST00000531145.1	39405	ENSG00000205177	C11orf91	chromosome 11 open reading frame 91
chr11	33676244	33676638	395	*	Peak_1766	59	.	Intron (ENST00000534431.1/ENST00000534431.1, intron 1 of 3)	11	33698457	33700397	1941	2	100131378	ENST00000531145.1	23759	ENSG00000205177	C11orf91	chromosome 11 open reading frame 91
chr11	35589152	35590002	851	*	Peak_33	202	.	Distal Intergenic	11	35618419	35620868	2450	1	24147	ENST00000317811.5	-28417	ENSG00000179431	FJX1	four-jointed box kinase 1
chr11	3740073	3740302	230	*	Peak_8542	39	.	Intron (ENST00000324932.11/4928, intron 12 of 32)	11	3719488	3721039	1552	2	4928	ENST00000530516.1	-19034	ENSG00000110713	NUP98	nucleoporin 98
chr11	382950	383347	398	*	Peak_12827	34	.	Promoter (2-3kb)	11	380292	382109	1818	1	338707	ENST00000534778.1	2658	ENSG00000182272	B4GALNT4	beta-1,4-N-acetyl-galactosaminyltransferase 4
chr11	433037	433336	300	*	Peak_14052	32	.	Promoter (2-3kb)	11	429543	430113	571	2	338440	ENST00000525857.1	-2924	ENSG00000185101	ANO9	anoctamin 9
chr11	43309105	43309405	301	*	Peak_11413	34	.	Promoter (2-3kb)	11	43311963	43342676	30714	1	8539	ENST00000534695.5	-2558	ENSG00000166181	API5	apoptosis inhibitor 5
chr11	43605598	43606147	550	*	Peak_4269	46	.	Intron (ENST00000526615.6/ENST00000526615.6, intron 3 of 4)	11	43581394	43581483	90	1	406918	ENST00000362207.3	24204	ENSG00000199077	MIR129-2	microRNA 129-2
chr11	4383252	4383663	412	*	Peak_11414	34	.	Promoter (2-3kb)	11	4384897	4386188	1292	2	6737	ENST00000533692.1	2525	ENSG00000132109	TRIM21	tripartite motif containing 21
chr11	43968076	43968351	276	*	Peak_2416	53	.	Intron (ENST00000526408.1/ENST00000526408.1, intron 2 of 6)	11	43942590	43943883	1294	1	387763	ENST00000617612.1	25486	ENSG00000187479	C11orf96	chromosome 11 open reading frame 96
chr11	44289595	44290491	897	*	Peak_965	67	.	Intron (ENST00000329255.4/60529, intron 1 of 3)	11	44260440	44310166	49727	2	60529	ENST00000329255.4	19675	ENSG00000052850	ALX4	ALX homeobox 4
chr11	44339313	44339947	635	*	Peak_2417	53	.	Distal Intergenic	11	44260440	44310166	49727	2	60529	ENST00000329255.4	-29147	ENSG00000052850	ALX4	ALX homeobox 4
chr1	14451873	14452124	252	*	Peak_16280	28	.	Intron (ENST00000636203.1/23254, intron 2 of 16)	1	14348955	14391575	42621	2	105376762	ENST00000447908.2	-60298	NA	KAZN-AS1	KAZN antisense RNA 1
chr11	44754038	44755267	1230	*	Peak_253	98	.	Intron (ENST00000533786.5/90139, intron 1 of 6)	11	44764426	44932421	167996	1	90139	ENST00000340160.7	-9159	ENSG00000157570	TSPAN18	tetraspanin 18
chr11	44952620	44952926	307	*	Peak_8676	39	.	Promoter (1-2kb)	11	44932348	44951306	18959	2	9537	ENST00000616990.4	-1314	ENSG00000175274	TP53I11	tumor protein p53 inducible protein 11
chr1	145603252	145603481	230	*	Peak_4271	46	.	Intron (ENST00000619932.4/101929780, intron 1 of 19)	1	145572345	145607858	35514	2	101929780	ENST00000619932.4	4377	ENSG00000272150	NBPF25P	NBPF member 25, pseudogene
chr11	45926749	45927114	366	*	Peak_3190	50	.	Promoter (<=1kb)	11	45926451	45927938	1488	1	120071	ENST00000534410.1	298	ENSG00000165905	LARGE2	LARGE xylosyl- and glucuronyltransferase 2
chr11	46207644	46207898	255	*	Peak_7486	40	.	Distal Intergenic	11	46171947	46177105	5159	1	101928894	ENST00000533793.1	35697	ENSG00000255314	LOC101928894	uncharacterized LOC101928894
chr11	4634576	4634896	321	*	Peak_5379	46	.	Distal Intergenic	11	4639715	4640838	1124	1	390038	ENST00000357605.2	-4819	ENSG00000197428	OR51D1	olfactory receptor family 51 subfamily D member 1
chr11	4645883	4646312	430	*	Peak_5192	46	.	Promoter (2-3kb)	11	4643420	4655488	12069	1	143503	ENST00000530215.2	2463	ENSG00000180785	OR51E1	olfactory receptor family 51 subfamily E member 1
chr11	46664845	46665098	254	*	Peak_4272	46	.	Promoter (<=1kb)	11	46665509	46669532	4024	1	9776	ENST00000529395.1	-411	ENSG00000175224	ATG13	autophagy related 13
chr11	46792283	46792635	353	*	Peak_1021	66	.	Intron (ENST00000529230.5/9793, intron 13 of 43)	11	46783190	46784674	1485	2	9793	ENST00000528593.1	-7609	ENSG00000175216	CKAP5	cytoskeleton associated protein 5
chr11	4700116	4700535	420	*	Peak_10485	35	.	Promoter (2-3kb)	11	4682461	4697854	15394	2	81285	ENST00000532598.1	-2262	ENSG00000167332	OR51E2	olfactory receptor family 51 subfamily E member 2
chr1	14719842	14720336	495	*	Peak_11417	34	.	Intron (ENST00000636203.1/23254, intron 3 of 16)	1	14598717	15065797	467081	1	23254	ENST00000503743.5	121125	ENSG00000189337	KAZN	kazrin, periplakin interacting protein
chr1	147445124	147445385	262	*	Peak_18717	25	.	Intron (ENST00000619867.4/100289211, intron 3 of 5)	1	147258885	147517875	258991	2	100289211	ENST00000619867.4	72490	ENSG00000278811	LINC00624	long intergenic non-protein coding RNA 624
chr11	47624109	47624379	271	*	Peak_10486	35	.	Intron (ENST00000539759.5/23788, intron 5 of 5)	11	47618704	47629355	10652	2	23788	ENST00000534074.5	4976	ENSG00000109919	MTCH2	mitochondrial carrier 2
chr11	47675824	47676093	270	*	Peak_9722	36	.	Intron (ENST00000528609.5/79841, intron 4 of 8)	11	47659591	47690370	30780	2	79841	ENST00000528609.5	14277	ENSG00000165923	AGBL2	ATP/GTP binding protein like 2
chr11	47690567	47691157	591	*	Peak_441	82	.	Promoter (<=1kb)	11	47659591	47690370	30780	2	79841	ENST00000528609.5	-197	ENSG00000165923	AGBL2	ATP/GTP binding protein like 2
chr11	47807338	47807567	230	*	Peak_11418	34	.	Promoter (<=1kb)	11	47803437	47806515	3079	2	23279	ENST00000526569.1	-823	ENSG00000030066	NUP160	nucleoporin 160
chr1	14820504	14820733	230	*	Peak_7489	40	.	Intron (ENST00000636203.1/23254, intron 3 of 16)	1	14924130	15068152	144023	1	23254	ENST00000361144.9	-103397	ENSG00000189337	KAZN	kazrin, periplakin interacting protein
chr11	48221176	48221405	230	*	Peak_2418	53	.	Distal Intergenic	11	48216810	48217739	930	1	119765	ENST00000309562.3	4366	ENSG00000175619	OR4B1	olfactory receptor family 4 subfamily B member 1
chr11	494549	495195	647	*	Peak_4	1000	.	3' UTR	11	494544	498929	4386	2	6050	ENST00000529768.5	3734	ENSG00000023191	RNH1	ribonuclease/angiogenin inhibitor 1
chr11	497824	499317	1494	*	Peak_1	1000	.	Promoter (<=1kb)	11	494544	498929	4386	2	6050	ENST00000529768.5	0	ENSG00000023191	RNH1	ribonuclease/angiogenin inhibitor 1
chr11	499648	500142	495	*	Peak_2	1000	.	Promoter (<=1kb)	11	494544	498929	4386	2	6050	ENST00000529768.5	-719	ENSG00000023191	RNH1	ribonuclease/angiogenin inhibitor 1
chr11	500344	500793	450	*	Peak_3	1000	.	Promoter (1-2kb)	11	494544	498929	4386	2	6050	ENST00000529768.5	-1415	ENSG00000023191	RNH1	ribonuclease/angiogenin inhibitor 1
chr11	501920	502298	379	*	Peak_7	809	.	Promoter (<=1kb)	11	499677	502215	2539	2	6050	ENST00000531223.1	0	ENSG00000023191	RNH1	ribonuclease/angiogenin inhibitor 1
chr1	150673568	150673806	239	*	Peak_11419	34	.	Intron (ENST00000271732.7/55204, intron 2 of 4)	1	150646225	150697024	50800	2	55204	ENST00000271732.7	23218	ENSG00000143457	GOLPH3L	golgi phosphoprotein 3 like
chr1	150679517	150680052	536	*	Peak_4274	46	.	Intron (ENST00000271732.7/55204, intron 2 of 4)	1	150646225	150697024	50800	2	55204	ENST00000271732.7	16972	ENSG00000143457	GOLPH3L	golgi phosphoprotein 3 like
chr1	150720778	150721007	230	*	Peak_4275	46	.	Promoter (<=1kb)	1	150698060	150720876	22817	2	84072	ENST00000368995.8	0	ENSG00000143452	HORMAD1	HORMA domain containing 1
chr1	151239154	151239914	761	*	Peak_19464	25	.	Promoter (2-3kb)	1	151242112	151248483	6372	1	8394	ENST00000489625.1	-2198	ENSG00000143398	PIP5K1A	phosphatidylinositol-4-phosphate 5-kinase type 1 alpha
chr1	151807156	151807573	418	*	Peak_6247	43	.	Promoter (1-2kb)	1	151800264	151806154	5891	2	339398	ENST00000368820.3	-1002	ENSG00000213171	LINGO4	leucine rich repeat and Ig domain containing 4
chr1	15265385	15265660	276	*	Peak_8594	39	.	Intron (ENST00000358897.8/114827, intron 2 of 30)	1	15251785	15397529	145745	1	114827	ENST00000375998.8	13600	ENSG00000142621	FHAD1	forkhead associated phosphopeptide binding domain 1
chr1	153675531	153675815	285	*	Peak_13950	32	.	Promoter (2-3kb)	1	153678637	153693992	15356	1	4881	ENST00000368680.3	-2822	ENSG00000169418	NPR1	natriuretic peptide receptor 1
chr1	154213222	154213511	290	*	Peak_13671	32	.	Promoter (<=1kb)	1	154207540	154212730	5191	2	25912	ENST00000493814.1	-492	ENSG00000143612	C1orf43	chromosome 1 open reading frame 43
chr1	154501095	154501530	436	*	Peak_11421	34	.	Promoter (<=1kb)	1	154479481	154502113	22633	2	126669	ENST00000304760.2	583	ENSG00000169291	SHE	Src homology 2 domain containing E
chr1	154714715	154715002	288	*	Peak_1384	60	.	Exon (ENST00000271915.8/3782, exon 6 of 8)	1	154582107	154628013	45907	2	103	ENST00000649724.1	-86702	ENSG00000160710	ADAR	adenosine deaminase RNA specific
chr1	154882734	154883099	366	*	Peak_5736	44	.	Distal Intergenic	1	154697455	154870280	172826	2	3782	ENST00000271915.8	-12454	ENSG00000143603	KCNN3	potassium calcium-activated channel subfamily N member 3
chr1	155157486	155157715	230	*	Peak_14387	31	.	Distal Intergenic	1	155169408	155172777	3370	2	200185	ENST00000463527.5	15062	ENSG00000163463	KRTCAP2	keratinocyte associated protein 2
chr1	15534184	15534429	246	*	Peak_13592	32	.	5' UTR	1	15526813	15576092	49280	1	23341	ENST00000375849.5	7371	ENSG00000116138	DNAJC16	DnaJ heat shock protein family (Hsp40) member C16
chr1	155404273	155404530	258	*	Peak_13167	33	.	Intron (ENST00000368346.7/55870, intron 6 of 27)	1	155433178	155434262	1085	1	645682	ENST00000413175.2	-28648	ENSG00000237872	POU5F1P4	POU class 5 homeobox 1 pseudogene 4
chr1	155577318	155577897	580	*	Peak_9888	36	.	Distal Intergenic	1	155481411	155562807	81397	2	55870	ENST00000548830.1	-14511	ENSG00000116539	ASH1L	ASH1 like histone lysine methyltransferase
chr1	15567250	15567480	231	*	Peak_11018	35	.	Promoter (<=1kb)	1	15567046	15568061	1016	1	23341	ENST00000490811.1	204	ENSG00000116138	DNAJC16	DnaJ heat shock protein family (Hsp40) member C16
chr1	156060682	156061066	385	*	Peak_1218	63	.	Promoter (<=1kb)	1	156061160	156070514	9355	1	57111	ENST00000361084.9	-94	ENSG00000132698	RAB25	RAB25, member RAS oncogene family
chr1	156071045	156071350	306	*	Peak_2916	52	.	Promoter (2-3kb)	1	156068212	156070365	2154	1	57111	ENST00000497968.1	2833	ENSG00000132698	RAB25	RAB25, member RAS oncogene family
chr1	156153896	156154125	230	*	Peak_7352	40	.	Promoter (<=1kb)	1	156154371	156177752	23382	1	64218	ENST00000368282.1	-246	ENSG00000196189	SEMA4A	semaphorin 4A
chr1	156347498	156347886	389	*	Peak_5528	45	.	Intron (ENST00000413555.5/7203, intron 1 of 7)	1	156338902	156346995	8094	1	128229	ENST00000368251.1	8596	ENSG00000163467	TSACC	TSSK6 activating cochaperone
chr1	156367066	156367518	453	*	Peak_3289	50	.	Promoter (<=1kb)	1	156320839	156367837	46999	2	7203	ENST00000463132.5	319	ENSG00000163468	CCT3	chaperonin containing TCP1 subunit 3
chr1	156391199	156392185	987	*	Peak_287	96	.	Exon (ENST00000451362.1/ENST00000451362.1, exon 2 of 2)	1	156382313	156384603	2291	1	57127	ENST00000622297.1	8886	ENSG00000132677	RHBG	Rh family B glycoprotein (gene/pseudogene)
chr1	156393790	156394278	489	*	Peak_4281	46	.	Exon (ENST00000451362.1/ENST00000451362.1, exon 2 of 2)	1	156382313	156384603	2291	1	57127	ENST00000622297.1	11477	ENSG00000132677	RHBG	Rh family B glycoprotein (gene/pseudogene)
chr1	156395437	156395867	431	*	Peak_3651	47	.	Exon (ENST00000451362.1/ENST00000451362.1, exon 2 of 2)	1	156404264	156408091	3828	2	10485	ENST00000498346.1	12224	ENSG00000125462	C1orf61	chromosome 1 open reading frame 61
chr11	57481017	57481330	314	*	Peak_5879	44	.	Distal Intergenic	11	57491253	57494520	3268	2	8501	ENST00000529452.5	13190	ENSG00000149150	SLC43A1	solute carrier family 43 member 1
chr11	58030366	58030816	451	*	Peak_11427	34	.	Promoter (<=1kb)	11	58030930	58031931	1002	1	219952	ENST00000302622.3	-114	ENSG00000279051	OR6Q1	olfactory receptor family 6 subfamily Q member 1 (gene/pseudogene)
chr11	58164906	58165138	233	*	Peak_11428	34	.	Intron (ENST00000335397.3/219956, intron 2 of 2)	11	58190434	58191518	1085	1	219957	ENST00000311591.3	-25296	ENSG00000186513	OR9Q2	olfactory receptor family 9 subfamily Q member 2
chr11	58532005	58532263	259	*	Peak_8323	40	.	Intron (ENST00000530561.5/9404, intron 8 of 9)	11	58507175	58508105	931	2	219968	ENST00000360374.2	-23900	ENSG00000198283	OR5B21	olfactory receptor family 5 subfamily B member 21
chr11	5866396	5866646	251	*	Peak_4285	46	.	Intron (ENST00000380027.5/85363, intron 1 of 10)	11	5663563	5872358	208796	2	85363	ENST00000380027.5	5712	ENSG00000132256	TRIM5	tripartite motif containing 5
chr11	5912668	5912918	251	*	Peak_1386	60	.	Intron (ENST00000412903.1/85363, intron 2 of 4)	11	5678320	5938619	260300	2	85363	ENST00000412903.1	25701	ENSG00000132256	TRIM5	tripartite motif containing 5
chr11	59271336	59271609	274	*	Peak_2119	55	.	Exon (ENST00000399003.1/ENST00000399003.1, exon 2 of 2)	11	59208510	59212951	4442	2	219972	ENST00000361050.3	-58385	ENSG00000197629	MPEG1	macrophage expressed 1
chr11	59325482	59325792	311	*	Peak_5380	46	.	Distal Intergenic	11	59364412	59365448	1037	1	390195	ENST00000313940.2	-38620	ENSG00000176495	OR5AN1	olfactory receptor family 5 subfamily AN member 1
chr11	59387586	59388170	585	*	Peak_7493	40	.	Distal Intergenic	11	59364412	59365448	1037	1	390195	ENST00000313940.2	23174	ENSG00000176495	OR5AN1	olfactory receptor family 5 subfamily AN member 1
chr1	15944571	15944941	371	*	Peak_1101	64	.	Promoter (<=1kb)	1	15942407	15944428	2022	2	7709	ENST00000444358.1	-143	ENSG00000116809	ZBTB17	zinc finger and BTB domain containing 17
chr11	59472158	59472435	278	*	Peak_1387	60	.	Distal Intergenic	11	59456938	59457991	1054	1	219983	ENST00000300127.2	15220	ENSG00000166884	OR4D6	olfactory receptor family 4 subfamily D member 6
chr11	59504280	59504643	364	*	Peak_622	75	.	Promoter (<=1kb)	11	59503576	59504511	936	1	219986	ENST00000313253.1	704	ENSG00000176200	OR4D11	olfactory receptor family 4 subfamily D member 11
chr1	159935917	159936201	285	*	Peak_15823	29	.	Promoter (1-2kb)	1	159927039	159933934	6896	2	57549	ENST00000493195.5	-1983	ENSG00000085552	IGSF9	immunoglobulin superfamily member 9
chr11	60100554	60100830	277	*	Peak_11434	34	.	Distal Intergenic	11	60088664	60098466	9803	1	2206	ENST00000617306.1	11890	ENSG00000149534	MS4A2	membrane spanning 4-domains A2
chr1	160313042	160313365	324	*	Peak_16285	28	.	Promoter (2-3kb)	1	160308930	160310522	1593	2	1314	ENST00000481040.1	-2520	ENSG00000122218	COPA	coatomer protein complex subunit alpha
chr11	60595713	60595968	256	*	Peak_4287	46	.	Intron (ENST00000637534.1/ENST00000637534.1, intron 2 of 3)	11	60615729	60687262	71534	1	283197	ENST00000646374.1	-19761	ENSG00000181995	LINC00301	long intergenic non-protein coding RNA 301
chr1	160609774	160610028	255	*	Peak_3978	47	.	3' UTR	1	160541095	160579516	38422	2	8832	ENST00000534968.5	-30258	ENSG00000066294	CD84	CD84 molecule
chr11	60791609	60792094	486	*	Peak_2027	57	.	Intron (ENST00000308287.1/341116, intron 3 of 7)	11	60785348	60801305	15958	1	341116	ENST00000308287.1	6261	ENSG00000172689	MS4A10	membrane spanning 4-domains A10
chr11	61118785	61119080	296	*	Peak_8654	39	.	Exon (ENST00000347785.7/921, exon 4 of 11)	11	61102509	61119359	16851	1	921	ENST00000544014.1	16276	ENSG00000110448	CD5	CD5 molecule
chr11	61654881	61655110	230	*	Peak_7230	41	.	Exon (ENST00000542121.1/ENST00000542121.1, exon 2 of 2)	11	61680433	61747001	66569	1	747	ENST00000257215.9	-25323	ENSG00000134780	DAGLA	diacylglycerol lipase alpha
chr11	62005576	62006080	505	*	Peak_13148	33	.	Distal Intergenic	11	61964285	61967660	3376	2	2495	ENST00000273550.11	-37916	ENSG00000167996	FTH1	ferritin heavy chain 1
chr11	62171769	62172003	235	*	Peak_10342	35	.	Distal Intergenic	11	62190216	62193539	3324	1	10648	ENST00000306238.3	-18213	ENSG00000168515	SCGB1D1	secretoglobin family 1D member 1
chr11	62213504	62213802	299	*	Peak_3597	48	.	3' UTR	11	62208668	62213939	5272	1	4246	ENST00000244930.5	4836	ENSG00000124939	SCGB2A1	secretoglobin family 2A member 1
chr1	162215032	162215424	393	*	Peak_11437	34	.	Intron (ENST00000530878.5/9722, intron 2 of 9)	1	162157107	162157182	76	1	100616386	ENST00000577581.1	57925	ENSG00000266144	MIR4654	microRNA 4654
chr11	62296388	62297118	731	*	Peak_7099	41	.	Promoter (1-2kb)	11	62296277	62299064	2788	2	404552	ENST00000358585.2	1946	ENSG00000197745	SCGB1D4	secretoglobin family 1D member 4
chr11	62299879	62300222	344	*	Peak_623	75	.	Promoter (<=1kb)	11	62296277	62299064	2788	2	404552	ENST00000358585.2	-815	ENSG00000197745	SCGB1D4	secretoglobin family 1D member 4
chr11	62347461	62347961	501	*	Peak_680	74	.	Intron (ENST00000415229.6/80150, intron 2 of 6)	11	62357053	62383247	26195	1	80150	ENST00000528206.1	-9092	ENSG00000162174	ASRGL1	asparaginase like 1
chr11	63375352	63375712	361	*	Peak_1388	60	.	3' UTR	11	63369808	63410294	40487	1	114571	ENST00000279178.3	5544	ENSG00000149742	SLC22A9	solute carrier family 22 member 9
chr11	63452327	63453221	895	*	Peak_6644	42	.	Distal Intergenic	11	63466146	63490532	24387	2	117245	ENST00000538712.1	37311	ENSG00000168004	PLAAT5	phospholipase A and acyltransferase 5
chr11	63900557	63900848	292	*	Peak_3798	47	.	Promoter (1-2kb)	11	63902687	63903403	717	1	2011	ENST00000535116.1	-1839	ENSG00000072518	MARK2	microtubule affinity regulating kinase 2
chr11	64519859	64520088	230	*	Peak_9891	36	.	Distal Intergenic	11	64555626	64572875	17250	1	55867	ENST00000301891.8	-35538	ENSG00000168065	SLC22A11	solute carrier family 22 member 11
chr11	64529518	64530017	500	*	Peak_1324	60	.	Distal Intergenic	11	64555626	64572875	17250	1	55867	ENST00000301891.8	-25609	ENSG00000168065	SLC22A11	solute carrier family 22 member 11
chr11	64721146	64721530	385	*	Peak_5856	44	.	Promoter (1-2kb)	11	64606174	64723188	117015	2	9379	ENST00000377559.7	1658	ENSG00000110076	NRXN2	neurexin 2
chr11	65171424	65171657	234	*	Peak_18197	26	.	Promoter (1-2kb)	11	65170154	65173244	3091	1	387778	ENST00000377185.2	1270	ENSG00000204710	SPDYC	speedy/RINGO cell cycle regulator family member C
chr11	65423595	65424351	757	*	Peak_6489	42	.	Promoter (<=1kb)	11	65423638	65423742	105	1	283131	ENST00000620525.1	0	ENSG00000245532	NEAT1	nuclear paraspeckle assembly transcript 1
chr11	65427471	65428061	591	*	Peak_11014	35	.	Exon (ENST00000501122.2/283131, exon 1 of 1)	11	65423960	65424118	159	1	283131	ENST00000613347.1	3511	ENSG00000245532	NEAT1	nuclear paraspeckle assembly transcript 1
chr1	165473599	165473938	340	*	Peak_7499	40	.	Downstream (2-3kb)	1	165493073	165501670	8598	2	400794	ENST00000418925.1	27732	ENSG00000237463	LRRC52-AS1	LRRC52 antisense RNA 1
chr11	65832765	65833315	551	*	Peak_3761	47	.	Promoter (<=1kb)	11	65833641	65853701	20061	1	254122	ENST00000308342.6	-326	ENSG00000172803	SNX32	sorting nexin 32
chr11	65968912	65969311	400	*	Peak_9041	38	.	Intron (ENST00000312397.9/9092, intron 12 of 19)	11	65961729	65965447	3719	1	9092	ENST00000530251.1	7183	ENSG00000175467	SART1	spliceosome associated factor 1, recruiter of U4/U6.U5 tri-snRNP
chr1	16605638	16605963	326	*	Peak_819	70	.	Promoter (<=1kb)	1	16564853	16604934	40082	2	55672	ENST00000392963.5	-704	ENSG00000219481	NBPF1	NBPF member 1
chr11	66470911	66471176	266	*	Peak_3391	49	.	Promoter (2-3kb)	11	66473424	66477337	3914	1	246330	ENST00000528752.1	-2248	ENSG00000174516	PELI3	pellino E3 ubiquitin protein ligase family member 3
chr11	66471684	66472034	351	*	Peak_5371	46	.	Promoter (1-2kb)	11	66473424	66477337	3914	1	246330	ENST00000528752.1	-1390	ENSG00000174516	PELI3	pellino E3 ubiquitin protein ligase family member 3
chr11	66473309	66473793	485	*	Peak_7341	40	.	Promoter (<=1kb)	11	66473424	66477337	3914	1	246330	ENST00000528752.1	0	ENSG00000174516	PELI3	pellino E3 ubiquitin protein ligase family member 3
chr11	66687151	66688246	1096	*	Peak_1358	60	.	Promoter (<=1kb)	11	66686793	66687524	732	2	6712	ENST00000530775.1	0	ENSG00000173898	SPTBN2	spectrin beta, non-erythrocytic 2
chr11	66802628	66802877	250	*	Peak_8917	38	.	Intron (ENST00000524551.5/79703, intron 5 of 5)	11	66795897	66804168	8272	1	79703	ENST00000527352.1	6731	ENSG00000173715	C11orf80	chromosome 11 open reading frame 80
chr1	166921039	166921448	410	*	Peak_2704	53	.	Exon (ENST00000271417.7/387597, exon 9 of 10)	1	166856510	166876327	19818	2	117143	ENST00000367874.4	-44712	ENSG00000152382	TADA1	transcriptional adaptor 1
chr1	166946756	166947018	263	*	Peak_8457	39	.	Intron (ENST00000271417.7/387597, intron 3 of 9)	1	166908191	166975324	67134	2	387597	ENST00000271417.7	28306	ENSG00000143195	ILDR2	immunoglobulin like domain containing receptor 2
chr11	67082129	67082617	489	*	Peak_3646	48	.	Distal Intergenic	11	67056889	67071691	14803	1	29984	ENST00000532559.1	25240	ENSG00000173156	RHOD	ras homolog family member D
chr1	167476846	167477578	733	*	Peak_4291	46	.	Intron (ENST00000483825.5/919, intron 1 of 6)	1	167431173	167439640	8468	2	919	ENST00000470379.1	-37206	ENSG00000198821	CD247	CD247 molecule
chr1	167571229	167571592	364	*	Peak_5258	46	.	Distal Intergenic	1	167529117	167553805	24689	2	8804	ENST00000466652.2	-17424	ENSG00000143162	CREG1	cellular repressor of E1A stimulated genes 1
chr1	167605102	167605607	506	*	Peak_4292	46	.	Distal Intergenic	1	167630093	167706248	76156	1	92241	ENST00000537350.5	-24486	ENSG00000198771	RCSD1	RCSD domain containing 1
chr11	67878788	67879037	250	*	Peak_1389	60	.	Distal Intergenic	11	67796683	67805336	8654	2	645332	ENST00000525180.1	-73452	ENSG00000160172	FAM86C2P	family with sequence similarity 86, member A pseudogene
chr1	168098568	168099022	455	*	Peak_18732	25	.	Intron (ENST00000539777.5/23432, intron 1 of 4)	1	168090446	168104909	14464	2	23432	ENST00000493800.1	5887	ENSG00000143147	GPR161	G protein-coupled receptor 161
chr11	68145964	68146319	356	*	Peak_5857	44	.	Distal Intergenic	11	68053820	68121444	67625	2	1119	ENST00000356135.9	-24520	ENSG00000110721	CHKA	choline kinase alpha
chr11	68305485	68305912	428	*	Peak_20248	22	.	Distal Intergenic	11	68312609	68449275	136667	1	4041	ENST00000294304.11	-6697	ENSG00000162337	LRP5	LDL receptor related protein 5
chr11	6831161	6831809	649	*	Peak_382	87	.	Intron (ENST00000637205.1/ENST00000637205.1, intron 3 of 3)	11	6845652	6846705	1054	1	144124	ENST00000299454.4	-13843	ENSG00000166363	OR10A5	olfactory receptor family 10 subfamily A member 5
chr11	68416132	68416440	309	*	Peak_3583	48	.	3' UTR	11	68410029	68413195	3167	1	4041	ENST00000528714.1	6103	ENSG00000162337	LRP5	LDL receptor related protein 5
chr1	168474114	168474354	241	*	Peak_5738	44	.	Intron (ENST00000636459.1/100505918, intron 4 of 8)	1	168401484	168495643	94160	2	100505918	ENST00000650143.1	21289	NA	LOC100505918	uncharacterized LOC100505918
chr1	168474588	168474904	317	*	Peak_2422	53	.	Intron (ENST00000636459.1/100505918, intron 4 of 8)	1	168401484	168495643	94160	2	100505918	ENST00000650143.1	20739	NA	LOC100505918	uncharacterized LOC100505918
chr11	68527924	68528249	326	*	Peak_15605	30	.	Intron (ENST00000530427.5/55291, intron 4 of 4)	11	68535411	68551127	15717	1	55291	ENST00000531244.1	-7162	ENSG00000110075	PPP6R3	protein phosphatase 6 regulatory subunit 3
chr1	168592175	168592440	266	*	Peak_12913	34	.	Distal Intergenic	1	168576473	168582077	5605	1	6375	ENST00000367818.3	15702	ENSG00000143184	XCL1	X-C motif chemokine ligand 1
chr11	68682863	68683327	465	*	Peak_1238	62	.	Promoter (1-2kb)	11	68684475	68691175	6701	1	51083	ENST00000265643.3	-1148	ENSG00000069482	GAL	galanin and GMAP prepropeptide
chr11	68685040	68685397	358	*	Peak_6834	41	.	Promoter (<=1kb)	11	68684475	68691175	6701	1	51083	ENST00000265643.3	565	ENSG00000069482	GAL	galanin and GMAP prepropeptide
chr11	68710452	68711806	1355	*	Peak_2058	56	.	Promoter (<=1kb)	11	68707442	68710606	3165	2	9633	ENST00000544398.1	0	ENSG00000132749	TESMIN	testis expressed metallothionein like protein
chr11	68713949	68714510	562	*	Peak_2732	53	.	Promoter (1-2kb)	11	68707559	68715934	8376	2	9633	ENST00000543240.1	1424	ENSG00000132749	TESMIN	testis expressed metallothionein like protein
chr1	168755953	168756182	230	*	Peak_11155	34	.	Intron (ENST00000650631.1/1805, intron 4 of 8)	1	168695459	168729264	33806	2	1805	ENST00000367817.3	-26689	ENSG00000143196	DPT	dermatopontin
chr11	68882161	68882390	230	*	Peak_3862	47	.	Distal Intergenic	11	68892492	68903778	11287	2	219927	ENST00000567045.5	21388	ENSG00000197345	MRPL21	mitochondrial ribosomal protein L21
chr1	16889063	16889330	268	*	Peak_5381	46	.	Promoter (<=1kb)	1	16888538	16889373	836	2	105376805	ENST00000422124.1	43	ENSG00000238142	LOC105376805	uncharacterized LOC105376805
chr11	69072194	69072705	512	*	Peak_3140	51	.	Promoter (<=1kb)	11	69072915	69162440	89526	1	219931	ENST00000637084.1	-210	ENSG00000162341	TPCN2	two pore segment channel 2
chr11	69099421	69099764	344	*	Peak_1652	60	.	Intron (ENST00000637504.1/219931, intron 19 of 19)	11	69083176	69083258	83	1	100422846	ENST00000581178.1	16245	ENSG00000265539	MIR3164	microRNA 3164
chr11	69200331	69200652	322	*	Peak_7031	41	.	Distal Intergenic	11	69147228	69171564	24337	2	338694	ENST00000562772.1	-28767	ENSG00000261070	LOC338694	uncharacterized LOC338694
chr11	69521261	69521586	326	*	Peak_8669	39	.	Distal Intergenic	11	69485611	69494952	9342	1	101928292	ENST00000642898.1	35650	NA	LINC01488	long intergenic non-protein coding RNA 1488
chr11	69614392	69614912	521	*	Peak_1158	64	.	Distal Intergenic	11	69641087	69654474	13388	1	595	ENST00000227507.2	-26175	ENSG00000110092	CCND1	cyclin D1
chr11	70022515	70022878	364	*	Peak_2103	56	.	Distal Intergenic	11	70056230	70063924	7695	2	101928443	ENST00000528316.5	41046	ENSG00000248844	LOC101928443	uncharacterized LOC101928443
chr11	70405723	70406025	303	*	Peak_3763	47	.	Promoter (1-2kb)	11	70407353	70420253	12901	1	2017	ENST00000415461.2	-1328	ENSG00000085733	CTTN	cortactin
chr11	70616569	70616921	353	*	Peak_2042	56	.	Intron (ENST00000449833.6/22941, intron 2 of 9)	11	70631094	70635490	4397	1	100874198	ENST00000429561.1	-14173	ENSG00000226627	SHANK2-AS1	SHANK2 antisense RNA 1
chr11	70721782	70722104	323	*	Peak_7100	41	.	Intron (ENST00000601538.5/22941, intron 13 of 24)	11	70492432	70698769	206338	2	22941	ENST00000426687.2	-23013	ENSG00000162105	SHANK2	SH3 and multiple ankyrin repeat domains 2
chr11	70743995	70744246	252	*	Peak_2881	52	.	Intron (ENST00000601538.5/22941, intron 13 of 24)	11	70492432	70698769	206338	2	22941	ENST00000426687.2	-45226	ENSG00000162105	SHANK2	SH3 and multiple ankyrin repeat domains 2
chr11	70782088	70782502	415	*	Peak_1083	65	.	Intron (ENST00000601538.5/22941, intron 13 of 24)	11	70654146	70807074	152929	2	22941	ENST00000470759.5	24572	ENSG00000162105	SHANK2	SH3 and multiple ankyrin repeat domains 2
chr11	70785151	70785452	302	*	Peak_703	73	.	Intron (ENST00000601538.5/22941, intron 13 of 24)	11	70654146	70807074	152929	2	22941	ENST00000470759.5	21622	ENSG00000162105	SHANK2	SH3 and multiple ankyrin repeat domains 2
chr11	70883777	70884016	240	*	Peak_19520	24	.	Intron (ENST00000601538.5/22941, intron 10 of 24)	11	70807049	70873122	66074	2	22941	ENST00000425049.1	-10655	ENSG00000162105	SHANK2	SH3 and multiple ankyrin repeat domains 2
chr11	71111136	71111421	286	*	Peak_12914	34	.	Intron (ENST00000601538.5/22941, intron 4 of 24)	11	70952702	71094688	141987	2	22941	ENST00000458632.2	-16448	ENSG00000162105	SHANK2	SH3 and multiple ankyrin repeat domains 2
chr11	71143170	71143549	380	*	Peak_8678	39	.	Intron (ENST00000601538.5/22941, intron 2 of 24)	11	70952702	71094688	141987	2	22941	ENST00000458632.2	-48482	ENSG00000162105	SHANK2	SH3 and multiple ankyrin repeat domains 2
chr11	71193387	71194058	672	*	Peak_2151	55	.	Intron (ENST00000601538.5/22941, intron 1 of 24)	11	70469435	71224762	755328	2	22941	ENST00000601538.5	30704	ENSG00000162105	SHANK2	SH3 and multiple ankyrin repeat domains 2
chr1	171197663	171197971	309	*	Peak_1390	60	.	Intron (ENST00000209929.9/2327, intron 4 of 8)	1	171207543	171209207	1665	1	2327	ENST00000488431.1	-9572	ENSG00000094963	FMO2	flavin containing monooxygenase 2
chr11	71368922	71369201	280	*	Peak_8458	39	.	Distal Intergenic	11	71405746	71423354	17609	2	399923	ENST00000331301.8	54153	ENSG00000172900	FLJ42102	uncharacterized LOC399923
chr11	71484297	71484635	339	*	Peak_11088	35	.	Promoter (1-2kb)	11	71482723	71484392	1670	1	55191	ENST00000524450.1	1574	ENSG00000172890	NADSYN1	NAD synthetase 1
chr1	171636580	171636875	296	*	Peak_8938	38	.	3' UTR	1	171635417	171652629	17213	2	4653	ENST00000638471.1	15754	ENSG00000034971	MYOC	myocilin
chr1	171736494	171736800	307	*	Peak_16055	29	.	Intron (ENST00000236192.11/8674, intron 2 of 7)	1	171701092	171742060	40969	2	8674	ENST00000474047.5	5260	ENSG00000117533	VAMP4	vesicle associated membrane protein 4
chr1	171768662	171769099	438	*	Peak_7503	40	.	Distal Intergenic	1	171781664	171786080	4417	1	51603	ENST00000485629.1	-12565	ENSG00000010165	EEF1AKNMT	eEF1A lysine and N-terminal methyltransferase
chr11	71774530	71774971	442	*	Peak_1892	58	.	Intron (ENST00000527856.5/ENST00000527856.5, intron 3 of 4)	11	71787510	71801234	13725	1	55199	ENST00000346333.10	-12539	ENSG00000158483	FAM86C1	family with sequence similarity 86 member C1
chr1	171899059	171899291	233	*	Peak_3980	47	.	Intron (ENST00000367733.6/26052, intron 1 of 14)	1	171864187	171864687	501	1	100874284	ENST00000450800.1	34872	ENSG00000233540	DNM3-IT1	DNM3 intronic transcript 1
chr11	72018919	72019150	232	*	Peak_1793	58	.	Exon (ENST00000502284.1/100128494, exon 3 of 4)	11	72014291	72020910	6620	1	100128494	ENST00000502284.1	4628	ENSG00000251143	LOC100128494	uncharacterized LOC100128494
chr1	172169173	172169419	247	*	Peak_3072	51	.	Intron (ENST00000355305.9/26052, intron 15 of 20)	1	172138397	172144840	6444	2	100628315	ENST00000417354.3	-24333	NA	DNM3OS	DNM3 opposite strand/antisense RNA
chr11	72589670	72589926	257	*	Peak_13325	33	.	Promoter (<=1kb)	11	72585426	72590021	4596	2	5138	ENST00000538299.1	95	ENSG00000186642	PDE2A	phosphodiesterase 2A
chr11	72690449	72690739	291	*	Peak_10107	36	.	Promoter (<=1kb)	11	72687260	72689546	2287	2	116985	ENST00000542612.1	-903	ENSG00000186635	ARAP1	ArfGAP with RhoGAP domain, ankyrin repeat and PH domain 1
chr1	172835565	172835818	254	*	Peak_2050	56	.	Intron (ENST00000432694.2/ENST00000432694.2, intron 1 of 4)	1	172659144	172666075	6932	1	356	ENST00000340030.4	176421	ENSG00000117560	FASLG	Fas ligand
chr1	172883886	172884228	343	*	Peak_11450	34	.	Intron (ENST00000432694.2/ENST00000432694.2, intron 1 of 4)	1	173039960	173050963	11004	2	8995	ENST00000404377.3	166735	ENSG00000120337	TNFSF18	TNF superfamily member 18
chr1	172889115	172889551	437	*	Peak_7020	41	.	Intron (ENST00000432694.2/ENST00000432694.2, intron 1 of 4)	1	173039960	173050963	11004	2	8995	ENST00000404377.3	161412	ENSG00000120337	TNFSF18	TNF superfamily member 18
chr11	73010816	73011263	448	*	Peak_8566	39	.	Intron (ENST00000311172.11/9873, intron 3 of 18)	11	72983765	72989012	5248	2	9873	ENST00000543644.1	-21804	ENSG00000137478	FCHSD2	FCH and double SH3 domains 2
chr11	7308869	7309098	230	*	Peak_11451	34	.	Intron (ENST00000524820.6/143425, intron 2 of 8)	11	7252170	7469037	216868	1	143425	ENST00000532592.1	56699	ENSG00000170743	SYT9	synaptotagmin 9
chr1	173319507	173319753	247	*	Peak_7505	40	.	Distal Intergenic	1	173183735	173207313	23579	2	7292	ENST00000281834.3	-112194	ENSG00000117586	TNFSF4	TNF superfamily member 4
chr1	173470540	173471114	575	*	Peak_1060	65	.	Distal Intergenic	1	173477266	173488807	11542	1	9588	ENST00000340385.5	-6152	ENSG00000117592	PRDX6	peroxiredoxin 6
chr11	73927428	73927665	238	*	Peak_6009	44	.	3' UTR	11	73950319	73970287	19969	1	374407	ENST00000339764.5	-22654	ENSG00000187726	DNAJB13	DnaJ heat shock protein family (Hsp40) member B13
chr11	74305952	74306269	318	*	Peak_6517	42	.	Intron (ENST00000524388.5/283208, intron 1 of 15)	11	74311362	74324705	13344	1	101928580	ENST00000502071.2	-5093	ENSG00000246211	P4HA3-AS1	P4HA3 antisense RNA 1
chr1	174384012	174384241	230	*	Peak_7506	40	.	Intron (ENST00000357444.10/9910, intron 12 of 13)	1	174365230	174637488	272259	1	9910	ENST00000526253.1	18782	ENSG00000152061	RABGAP1L	RAB GTPase activating protein 1 like
chr1	174479010	174479277	268	*	Peak_11452	34	.	Intron (ENST00000357444.10/9910, intron 13 of 13)	1	174448111	174449198	1088	1	9293	ENST00000367685.3	30899	ENSG00000203737	GPR52	G protein-coupled receptor 52
chr11	74654940	74655504	565	*	Peak_9677	36	.	Intron (ENST00000524752.1/10714, intron 4 of 4)	11	74638614	74641062	2449	1	10714	ENST00000532954.1	16326	ENSG00000077514	POLD3	DNA polymerase delta 3, accessory subunit
chr11	75066934	75067425	492	*	Peak_17822	26	.	Distal Intergenic	11	75088713	75089754	1042	2	341152	ENST00000305159.3	22329	ENSG00000171561	OR2AT4	olfactory receptor family 2 subfamily AT member 4
chr11	75195629	75195925	297	*	Peak_3799	47	.	Promoter (<=1kb)	11	75196254	75203408	7155	1	11309	ENST00000530012.1	-329	ENSG00000137491	SLCO2B1	solute carrier organic anion transporter family member 2B1
chr11	75228629	75228926	298	*	Peak_13393	33	.	Exon (ENST00000531576.1/ENST00000531576.1, exon 1 of 1)	11	75240905	75243697	2793	1	100507050	ENST00000562197.2	-11979	ENSG00000261594	TPBGL	trophoblast glycoprotein like
chr11	75266958	75267268	311	*	Peak_3800	47	.	Intron (ENST00000420843.6/408, intron 15 of 15)	11	75270930	75274938	4009	2	408	ENST00000531012.1	7670	ENSG00000137486	ARRB1	arrestin beta 1
chr1	17562725	17563254	530	*	Peak_8407	39	.	Intron (ENST00000361221.7/55160, intron 1 of 28)	1	17580553	17697649	117097	1	55160	ENST00000375415.5	-17299	ENSG00000074964	ARHGEF10L	Rho guanine nucleotide exchange factor 10 like
chr11	7585250	7585647	398	*	Peak_7508	40	.	Intron (ENST00000299492.8/8495, intron 3 of 23)	11	7577117	7656977	79861	1	8495	ENST00000529021.1	8133	ENSG00000166387	PPFIBP2	PPFIA binding protein 2
chr11	76281288	76281620	333	*	Peak_846	69	.	Distal Intergenic	11	76186325	76206532	20208	2	7481	ENST00000322563.7	-74756	ENSG00000085741	WNT11	Wnt family member 11
chr11	7630226	7630592	367	*	Peak_4297	46	.	Promoter (<=1kb)	11	7630923	7642382	11460	1	8495	ENST00000534409.5	-331	ENSG00000166387	PPFIBP2	PPFIA binding protein 2
chr11	76641098	76641838	741	*	Peak_166	117	.	Distal Intergenic	11	76657570	76665971	8402	2	2615	ENST00000464145.1	24133	ENSG00000137507	LRRC32	leucine rich repeat containing 32
chr11	76717296	76717641	346	*	Peak_14856	31	.	Promoter (2-3kb)	11	76694041	76719801	25761	2	390226	ENST00000531117.2	2160	NA	GUCY2EP	guanylate cyclase 2E, pseudogene
chr11	77183727	77184162	436	*	Peak_17088	28	.	Promoter (<=1kb)	11	77184686	77191187	6502	1	4647	ENST00000467137.1	-524	ENSG00000137474	MYO7A	myosin VIIA
chr11	77212807	77214157	1351	*	Peak_2917	52	.	Promoter (<=1kb)	11	77212535	77213918	1384	1	4647	ENST00000481532.1	272	ENSG00000137474	MYO7A	myosin VIIA
chr1	178072859	178073100	242	*	Peak_11455	34	.	Distal Intergenic	1	178091509	178093600	2092	2	100302401	ENST00000419458.1	20500	ENSG00000224687	RASAL2-AS1	RASAL2 antisense RNA 1
chr11	78766363	78766618	256	*	Peak_3431	49	.	Intron (ENST00000278550.11/26011, intron 18 of 33)	11	78770992	78805411	34420	2	26011	ENST00000533525.1	38793	ENSG00000149256	TENM4	teneurin transmembrane protein 4
chr11	78828417	78828831	415	*	Peak_16994	28	.	Intron (ENST00000278550.11/26011, intron 12 of 33)	11	78770992	78805411	34420	2	26011	ENST00000533525.1	-23006	ENSG00000149256	TENM4	teneurin transmembrane protein 4
chr11	78882262	78883068	807	*	Peak_1391	60	.	Intron (ENST00000278550.11/26011, intron 9 of 33)	11	78889933	78903886	13954	2	26011	ENST00000533074.1	20818	ENSG00000149256	TENM4	teneurin transmembrane protein 4
chr11	78903105	78903837	733	*	Peak_7021	41	.	Promoter (<=1kb)	11	78889933	78903886	13954	2	26011	ENST00000533074.1	49	ENSG00000149256	TENM4	teneurin transmembrane protein 4
chr1	179118042	179118338	297	*	Peak_3393	49	.	Intron (ENST00000502732.5/27, intron 7 of 11)	1	179107718	179143044	35327	2	27	ENST00000504405.5	24706	ENSG00000143322	ABL2	ABL proto-oncogene 2, non-receptor tyrosine kinase
chr11	79594790	79595258	469	*	Peak_13449	33	.	Distal Intergenic	11	79148801	79440948	292148	2	26011	ENST00000531583.1	-153842	ENSG00000149256	TENM4	teneurin transmembrane protein 4
chr11	79803225	79803624	400	*	Peak_4299	46	.	Distal Intergenic	11	79148801	79440948	292148	2	26011	ENST00000531583.1	-362277	ENSG00000149256	TENM4	teneurin transmembrane protein 4
chr1	180196592	180196878	287	*	Peak_6893	41	.	Promoter (<=1kb)	1	180196682	180198016	1335	1	5768	ENST00000443059.1	0	ENSG00000116260	QSOX1	quiescin sulfhydryl oxidase 1
chr1	18033691	18033920	230	*	Peak_7511	40	.	Intron (ENST00000641892.1/ENST00000641892.1, intron 1 of 3)	1	18065657	18074412	8756	1	101927876	ENST00000569711.1	-31737	ENSG00000261781	LINC01654	long intergenic non-protein coding RNA 1654
chr11	80427787	80428241	455	*	Peak_18745	25	.	Distal Intergenic	11	80751200	80762826	11627	2	101928944	ENST00000526840.1	334585	ENSG00000255178	LOC101928944	uncharacterized LOC101928944
chr11	80656795	80657083	289	*	Peak_18746	25	.	Distal Intergenic	11	80751200	80762826	11627	2	101928944	ENST00000526840.1	105743	ENSG00000255178	LOC101928944	uncharacterized LOC101928944
chr11	80756789	80757048	260	*	Peak_2120	55	.	Intron (ENST00000526840.1/101928944, intron 2 of 2)	11	80751200	80762826	11627	2	101928944	ENST00000526840.1	5778	ENSG00000255178	LOC101928944	uncharacterized LOC101928944
chr11	81092073	81092412	340	*	Peak_11458	34	.	Distal Intergenic	11	80751200	80762826	11627	2	101928944	ENST00000526840.1	-329247	ENSG00000255178	LOC101928944	uncharacterized LOC101928944
chr11	81382139	81382368	230	*	Peak_18160	26	.	Distal Intergenic	11	81890741	81890836	96	2	100422823	ENST00000581016.1	508468	ENSG00000264110	MIR4300	microRNA 4300
chr1	181481581	181481853	273	*	Peak_11460	34	.	Promoter (1-2kb)	1	181483311	181652094	168784	1	777	ENST00000533229.1	-1458	ENSG00000198216	CACNA1E	calcium voltage-gated channel subunit alpha1 E
chr11	81527464	81527703	240	*	Peak_11461	34	.	Distal Intergenic	11	81890741	81890836	96	2	100422823	ENST00000581016.1	363133	ENSG00000264110	MIR4300	microRNA 4300
chr11	8159608	8160219	612	*	Peak_4301	46	.	Intron (ENST00000335425.7/79608, intron 1 of 1)	11	8108949	8168989	60041	2	79608	ENST00000309737.10	8770	ENSG00000166405	RIC3	RIC3 acetylcholine receptor chaperone
chr11	8167683	8167912	230	*	Peak_16294	28	.	Promoter (1-2kb)	11	8108949	8168989	60041	2	79608	ENST00000309737.10	1077	ENSG00000166405	RIC3	RIC3 acetylcholine receptor chaperone
chr11	8178591	8178912	322	*	Peak_6518	42	.	Exon (ENST00000499752.2/ENST00000499752.2, exon 3 of 3)	11	8108942	8169055	60114	2	79608	ENST00000343202.8	-9536	ENSG00000166405	RIC3	RIC3 acetylcholine receptor chaperone
chr11	8183206	8183435	230	*	Peak_7513	40	.	Distal Intergenic	11	8108942	8169055	60114	2	79608	ENST00000343202.8	-14151	ENSG00000166405	RIC3	RIC3 acetylcholine receptor chaperone
chr11	81943683	81943984	302	*	Peak_18748	25	.	Intron (ENST00000530896.5/101928989, intron 1 of 2)	11	81890741	81890836	96	2	100422823	ENST00000581016.1	-52847	ENSG00000264110	MIR4300	microRNA 4300
chr11	82059018	82059312	295	*	Peak_11463	34	.	Intron (ENST00000530896.5/101928989, intron 1 of 2)	11	81879851	82100043	220193	2	101928989	ENST00000530896.5	40731	ENSG00000245832	MIR4300HG	MIR4300 host gene
chr1	182182516	182182909	394	*	Peak_2427	53	.	Exon (ENST00000419731.1/ENST00000419731.1, exon 1 of 1)	1	182129310	182244399	115090	2	400799	ENST00000608183.1	61490	ENSG00000228918	LINC01344	long intergenic non-protein coding RNA 1344
chr1	182212505	182212868	364	*	Peak_16295	28	.	Intron (ENST00000608183.1/400799, intron 3 of 16)	1	182129310	182244399	115090	2	400799	ENST00000608183.1	31531	ENSG00000228918	LINC01344	long intergenic non-protein coding RNA 1344
chr11	82568157	82568625	469	*	Peak_6551	42	.	Intron (ENST00000532217.1/101928989, intron 3 of 4)	11	82100193	82718082	617890	2	101928989	ENST00000532217.1	149457	ENSG00000245832	MIR4300HG	MIR4300 host gene
chr1	182572307	182572577	271	*	Peak_8216	40	.	Downstream (1-2kb)	1	182556136	182560597	4462	1	353299	ENST00000634342.1	16171	ENSG00000121446	RGSL1	regulator of G protein signaling like 1
chr11	82667381	82667758	378	*	Peak_3192	50	.	Intron (ENST00000532217.1/101928989, intron 3 of 4)	11	82100193	82718082	617890	2	101928989	ENST00000532217.1	50324	ENSG00000245832	MIR4300HG	MIR4300 host gene
chr11	82732620	82733229	610	*	Peak_2334	54	.	Promoter (<=1kb)	11	82729941	82733864	3924	2	220382	ENST00000329203.4	635	ENSG00000182103	FAM181B	family with sequence similarity 181 member B
chr11	82875508	82875751	244	*	Peak_9465	37	.	Intron (ENST00000313010.7/5547, intron 1 of 8)	11	82853194	82858771	5578	2	5547	ENST00000534264.1	-16737	ENSG00000137509	PRCP	prolylcarboxypeptidase
chr11	82880061	82880635	575	*	Peak_1877	58	.	Intron (ENST00000313010.7/5547, intron 1 of 8)	11	82899975	82928889	28915	1	220042	ENST00000532277.5	-19340	ENSG00000165490	DDIAS	DNA damage induced apoptosis suppressor
chr11	8299257	8299620	364	*	Peak_11464	34	.	Distal Intergenic	11	8224314	8268716	44403	2	4004	ENST00000428101.6	-30541	ENSG00000166407	LMO1	LIM domain only 1
chr1	183098237	183098466	230	*	Peak_14366	31	.	Promoter (1-2kb)	1	183096544	183110631	14088	1	3915	ENST00000484114.2	1693	ENSG00000135862	LAMC1	laminin subunit gamma 1
chr11	83227117	83227393	277	*	Peak_17507	27	.	Promoter (<=1kb)	11	83227785	83256099	28315	1	338699	ENST00000531815.1	-392	ENSG00000137494	ANKRD42	ankyrin repeat domain 42
chr11	83357496	83357804	309	*	Peak_9517	37	.	Intron (ENST00000530045.5/ENST00000530045.5, intron 3 of 4)	11	83259097	83286407	27311	2	60492	ENST00000529689.5	-71089	ENSG00000137500	CCDC90B	coiled-coil domain containing 90B
chr1	183382060	183382289	230	*	Peak_11465	34	.	Intron (ENST00000287713.6/23057, intron 1 of 10)	1	183248237	183418602	170366	2	23057	ENST00000287713.6	36313	ENSG00000157064	NMNAT2	nicotinamide nucleotide adenylyltransferase 2
chr11	83436554	83437142	589	*	Peak_9897	36	.	Distal Intergenic	11	83459508	83462149	2642	2	1740	ENST00000529159.1	25007	ENSG00000150672	DLG2	discs large MAGUK scaffold protein 2
chr11	83448707	83449217	511	*	Peak_19672	24	.	Distal Intergenic	11	83459508	83462149	2642	2	1740	ENST00000529159.1	12932	ENSG00000150672	DLG2	discs large MAGUK scaffold protein 2
chr11	83613879	83614321	443	*	Peak_11466	34	.	Intron (ENST00000280241.12/1740, intron 13 of 21)	11	83472771	83682006	209236	2	1740	ENST00000524601.5	67685	ENSG00000150672	DLG2	discs large MAGUK scaffold protein 2
chr11	83661645	83661874	230	*	Peak_6250	43	.	Intron (ENST00000533669.5/ENST00000533669.5, intron 2 of 7)	11	83472771	83682006	209236	2	1740	ENST00000524601.5	20132	ENSG00000150672	DLG2	discs large MAGUK scaffold protein 2
chr11	83681278	83681525	248	*	Peak_2065	56	.	Promoter (<=1kb)	11	83472771	83682006	209236	2	1740	ENST00000524601.5	481	ENSG00000150672	DLG2	discs large MAGUK scaffold protein 2
chr1	183720891	183721120	230	*	Peak_7515	40	.	Intron (ENST00000304685.8/23179, intron 1 of 18)	1	183647567	183653316	5750	2	403314	ENST00000481562.1	-67575	ENSG00000173627	APOBEC4	apolipoprotein B mRNA editing enzyme catalytic polypeptide like 4
chr1	183751123	183751537	415	*	Peak_7516	40	.	Intron (ENST00000304685.8/23179, intron 2 of 18)	1	183805120	183928531	123412	1	23179	ENST00000360851.3	-53583	ENSG00000143344	RGL1	ral guanine nucleotide dissociation stimulator like 1
chr11	83906778	83907107	330	*	Peak_9057	38	.	Intron (ENST00000280241.12/1740, intron 9 of 21)	11	83532751	83725403	192653	2	1740	ENST00000529399.1	-181375	ENSG00000150672	DLG2	discs large MAGUK scaffold protein 2
chr11	84221053	84221468	416	*	Peak_18753	25	.	Intron (ENST00000280241.12/1740, intron 2 of 21)	11	83459422	84273188	813767	2	1740	ENST00000330014.11	51720	ENSG00000150672	DLG2	discs large MAGUK scaffold protein 2
chr11	84256160	84256392	233	*	Peak_4304	46	.	Intron (ENST00000280241.12/1740, intron 1 of 21)	11	83459422	84273188	813767	2	1740	ENST00000330014.11	16796	ENSG00000150672	DLG2	discs large MAGUK scaffold protein 2
chr11	8430653	8431061	409	*	Peak_4305	46	.	Intron (ENST00000473980.5/65975, intron 3 of 4)	11	8391868	8452906	61039	2	65975	ENST00000473980.5	21845	ENSG00000130413	STK33	serine/threonine kinase 33
chr1	184344179	184344408	230	*	Peak_4306	46	.	Distal Intergenic	1	184387058	184629020	241963	1	81563	ENST00000235307.6	-42650	ENSG00000116667	C1orf21	chromosome 1 open reading frame 21
chr11	84367298	84367554	257	*	Peak_3652	47	.	Intron (ENST00000398309.6/1740, intron 2 of 22)	11	83786441	84317339	530899	2	1740	ENST00000398301.6	-49959	ENSG00000150672	DLG2	discs large MAGUK scaffold protein 2
chr11	84517562	84518106	545	*	Peak_5383	46	.	Intron (ENST00000398309.6/1740, intron 2 of 22)	11	84098995	84437809	338815	2	1740	ENST00000527466.1	-79753	ENSG00000150672	DLG2	discs large MAGUK scaffold protein 2
chr11	84549753	84550074	322	*	Peak_1174	63	.	Intron (ENST00000398309.6/1740, intron 1 of 22)	11	84098995	84437809	338815	2	1740	ENST00000527466.1	-111944	ENSG00000150672	DLG2	discs large MAGUK scaffold protein 2
chr11	84607754	84608010	257	*	Peak_15075	30	.	Intron (ENST00000398309.6/1740, intron 1 of 22)	11	83457919	84720915	1262997	2	1740	ENST00000648622.1	112905	ENSG00000150672	DLG2	discs large MAGUK scaffold protein 2
chr11	84640550	84640994	445	*	Peak_11243	34	.	Exon (ENST00000472460.1/ENST00000472460.1, exon 1 of 1)	11	83457919	84720915	1262997	2	1740	ENST00000648622.1	79921	ENSG00000150672	DLG2	discs large MAGUK scaffold protein 2
chr1	18477862	18478184	323	*	Peak_1392	60	.	Promoter (2-3kb)	1	18480982	18486126	5145	1	127707	ENST00000400664.2	-2798	ENSG00000179023	KLHDC7A	kelch domain containing 7A
chr11	84864045	84864471	427	*	Peak_9409	37	.	Intron (ENST00000398309.6/1740, intron 1 of 22)	11	84686800	84923137	236338	2	1740	ENST00000530589.1	58666	ENSG00000150672	DLG2	discs large MAGUK scaffold protein 2
chr11	84993042	84993435	394	*	Peak_1000	66	.	Intron (ENST00000376104.6/1740, intron 6 of 27)	11	83455012	84923589	1468578	2	1740	ENST00000398309.6	-69453	ENSG00000150672	DLG2	discs large MAGUK scaffold protein 2
chr11	8522410	8522689	280	*	Peak_9899	36	.	Intron (ENST00000315204.5/65975, intron 2 of 13)	11	8474819	8565911	91093	2	65975	ENST00000526360.1	43222	ENSG00000130413	STK33	serine/threonine kinase 33
chr11	85369182	85369431	250	*	Peak_5295	46	.	Intron (ENST00000376104.6/1740, intron 3 of 27)	11	84534613	85133123	598511	2	1740	ENST00000527088.1	-236059	ENSG00000150672	DLG2	discs large MAGUK scaffold protein 2
chr11	85455742	85456098	357	*	Peak_11472	34	.	Intron (ENST00000376104.6/1740, intron 3 of 27)	11	83457919	85627270	2169352	2	1740	ENST00000376104.6	171172	ENSG00000150672	DLG2	discs large MAGUK scaffold protein 2
chr11	85456474	85456727	254	*	Peak_20438	20	.	Intron (ENST00000376104.6/1740, intron 3 of 27)	11	83457919	85627270	2169352	2	1740	ENST00000376104.6	170543	ENSG00000150672	DLG2	discs large MAGUK scaffold protein 2
chr11	85674221	85674463	243	*	Peak_6836	41	.	Intron (ENST00000531515.5/58487, intron 1 of 3)	11	85660168	85682863	22696	2	58487	ENST00000531515.5	8400	ENSG00000137504	CREBZF	CREB/ATF bZIP transcription factor
chr11	86091899	86092220	322	*	Peak_500	80	.	Distal Intergenic	11	85958839	86069882	111044	2	8301	ENST00000528398.5	-22017	ENSG00000073921	PICALM	phosphatidylinositol binding clathrin assembly protein
chr11	86411178	86411478	301	*	Peak_5479	45	.	Promoter (2-3kb)	11	86414326	86423106	8781	1	60494	ENST00000531587.5	-2848	ENSG00000149201	CCDC81	coiled-coil domain containing 81
chr11	86540717	86541432	716	*	Peak_6509	42	.	Intron (ENST00000524610.1/ENST00000524610.1, intron 2 of 2)	11	86457579	86498124	40546	2	10873	ENST00000525957.1	-42593	ENSG00000151376	ME3	malic enzyme 3
chr11	86974554	86974840	287	*	Peak_3352	49	.	Intron (ENST00000499504.7/100506368, intron 2 of 2)	11	86956091	87000490	44400	1	100506368	ENST00000531827.1	18463	ENSG00000246523	FZD4-DT	FZD4 divergent transcript
chr11	87078575	87079016	442	*	Peak_20252	22	.	Intron (ENST00000340353.11/65084, intron 3 of 13)	11	87071517	87157408	85892	1	65084	ENST00000531800.1	7058	ENSG00000166575	TMEM135	transmembrane protein 135
chr1	18717621	18718011	391	*	Peak_3415	49	.	Intron (ENST00000375375.7/5081, intron 7 of 7)	1	18631524	18736102	104579	1	5081	ENST00000400661.3	86097	ENSG00000009709	PAX7	paired box 7
chr11	87646548	87646910	363	*	Peak_860	69	.	Distal Intergenic	11	87718354	87719411	1058	2	105369423	ENST00000532606.1	72501	ENSG00000255183	LOC105369423	uncharacterized LOC105369423
chr11	88022439	88022852	414	*	Peak_6382	42	.	Intron (ENST00000649399.1/ENST00000649399.1, intron 1 of 3)	11	88113464	88175433	61970	2	23682	ENST00000531138.1	152581	ENSG00000123892	RAB38	RAB38, member RAS oncogene family
chr11	88040731	88041054	324	*	Peak_3378	49	.	Intron (ENST00000649399.1/ENST00000649399.1, intron 1 of 3)	11	88113464	88175433	61970	2	23682	ENST00000531138.1	134379	ENSG00000123892	RAB38	RAB38, member RAS oncogene family
chr11	88698860	88699250	391	*	Peak_901	67	.	Intron (ENST00000455756.6/2915, intron 3 of 8)	11	88511748	88512361	614	1	100873989	ENST00000531994.1	187112	ENSG00000255082	GRM5-AS1	GRM5 antisense RNA 1
chr11	88729860	88730311	452	*	Peak_4311	46	.	Intron (ENST00000455756.6/2915, intron 3 of 8)	11	88511748	88512361	614	1	100873989	ENST00000531994.1	218112	ENSG00000255082	GRM5-AS1	GRM5 antisense RNA 1
chr11	88772366	88772657	292	*	Peak_10497	35	.	Intron (ENST00000455756.6/2915, intron 3 of 8)	11	88511748	88512361	614	1	100873989	ENST00000531994.1	260618	ENSG00000255082	GRM5-AS1	GRM5 antisense RNA 1
chr11	88790127	88790733	607	*	Peak_8680	39	.	Intron (ENST00000455756.6/2915, intron 3 of 8)	11	88911936	89047370	135435	2	2915	ENST00000449371.6	256637	ENSG00000168959	GRM5	glutamate metabotropic receptor 5
chr11	89203386	89203615	230	*	Peak_7522	40	.	Intron (ENST00000263321.5/7299, intron 2 of 4)	11	89177893	89200611	22719	1	7299	ENST00000526139.1	25493	ENSG00000077498	TYR	tyrosinase
chr1	1901312	1901735	424	*	Peak_12828	34	.	Distal Intergenic	1	1785285	1891117	105833	2	2782	ENST00000615252.4	-10195	ENSG00000078369	GNB1	G protein subunit beta 1
chr11	90259718	90260118	401	*	Peak_4312	46	.	Intron (ENST00000649150.1/101929222, intron 1 of 7)	11	90251285	90863359	612075	1	101929222	ENST00000561596.5	8433	ENSG00000261645	DISC1FP1	DISC1 fusion partner 1
chr11	90302171	90302544	374	*	Peak_9132	38	.	Intron (ENST00000649150.1/101929222, intron 1 of 7)	11	90251285	90863359	612075	1	101929222	ENST00000561596.5	50886	ENSG00000261645	DISC1FP1	DISC1 fusion partner 1
chr11	90364821	90365057	237	*	Peak_14244	31	.	Intron (ENST00000649150.1/101929222, intron 2 of 7)	11	90251285	90863359	612075	1	101929222	ENST00000561596.5	113536	ENSG00000261645	DISC1FP1	DISC1 fusion partner 1
chr11	9039635	9040145	511	*	Peak_5976	44	.	Intron (ENST00000531592.1/ENST00000531592.1, intron 2 of 2)	11	9027489	9031260	3772	2	57758	ENST00000519535.1	-8375	ENSG00000175356	SCUBE2	signal peptide, CUB domain and EGF like domain containing 2
chr1	19044725	19044954	230	*	Peak_10118	36	.	Distal Intergenic	1	19074567	19077827	3261	2	23352	ENST00000486515.1	32873	ENSG00000127481	UBR4	ubiquitin protein ligase E3 component n-recognin 4
chr1	190596478	190596786	309	*	Peak_2429	53	.	Distal Intergenic	1	190624890	190801658	176769	1	440704	ENST00000413356.1	-28104	ENSG00000231175	LINC01720	long intergenic non-protein coding RNA 1720
chr11	90617267	90617777	511	*	Peak_3982	47	.	Intron (ENST00000649150.1/101929222, intron 3 of 7)	11	90555774	90555857	84	2	100616186	ENST00000582647.1	-61410	ENSG00000266703	MIR4490	microRNA 4490
chr11	90687532	90687761	230	*	Peak_11476	34	.	Intron (ENST00000649150.1/101929222, intron 3 of 7)	11	90555774	90555857	84	2	100616186	ENST00000582647.1	-131675	ENSG00000266703	MIR4490	microRNA 4490
chr11	90821945	90822365	421	*	Peak_6600	42	.	Intron (ENST00000649150.1/101929222, intron 4 of 7)	11	90869121	90869202	82	2	100302228	ENST00000408659.1	46837	ENSG00000221586	MIR1261	microRNA 1261
chr11	9090745	9091326	582	*	Peak_1985	57	.	Promoter (<=1kb)	11	9019498	9091546	72049	2	57758	ENST00000649792.1	220	ENSG00000175356	SCUBE2	signal peptide, CUB domain and EGF like domain containing 2
chr11	91485002	91485689	688	*	Peak_1001	66	.	Distal Intergenic	11	90869121	90869202	82	2	100302228	ENST00000408659.1	-615800	ENSG00000221586	MIR1261	microRNA 1261
chr11	92034947	92035222	276	*	Peak_17887	26	.	Distal Intergenic	11	92352096	92896452	544357	1	120114	ENST00000409404.6	-316874	ENSG00000165323	FAT3	FAT atypical cadherin 3
chr11	92761829	92762220	392	*	Peak_5565	45	.	Exon (ENST00000409404.6/120114, exon 4 of 25)	11	92844340	92896305	51966	1	120114	ENST00000533797.1	-82120	ENSG00000165323	FAT3	FAT atypical cadherin 3
chr11	92924842	92925710	869	*	Peak_14470	31	.	Intron (ENST00000634657.1/ENST00000634657.1, intron 1 of 1)	11	92914272	92915604	1333	2	105369431	ENST00000635432.1	-9238	NA	LOC105369431	uncharacterized LOC105369431
chr11	93110409	93110657	249	*	Peak_4313	46	.	Distal Intergenic	11	93148148	93155488	7341	2	120103	ENST00000527503.1	44831	ENSG00000180773	SLC36A4	solute carrier family 36 member 4
chr1	193358452	193358681	230	*	Peak_1395	60	.	Intron (ENST00000420807.1/101929184, intron 3 of 3)	1	193304745	193365953	61209	1	101929184	ENST00000420807.1	53707	ENSG00000232077	LINC01031	long intergenic non-protein coding RNA 1031
chr11	93434223	93434489	267	*	Peak_8241	40	.	Intron (ENST00000618031.4/159989, intron 13 of 13)	11	93411059	93437702	26644	1	159989	ENST00000529909.1	23164	ENSG00000165325	DEUP1	deuterosome assembly protein 1
chr11	93449514	93450421	908	*	Peak_10120	36	.	Distal Intergenic	11	93411059	93437702	26644	1	159989	ENST00000529909.1	38455	ENSG00000165325	DEUP1	deuterosome assembly protein 1
chr11	93481197	93481481	285	*	Peak_3725	47	.	Intron (ENST00000525141.1/56935, intron 1 of 1)	11	93478472	93499351	20880	2	56935	ENST00000525141.1	17870	ENSG00000166002	SMCO4	single-pass membrane protein with coiled-coil domains 4
chr1	193576086	193576421	336	*	Peak_18764	25	.	Distal Intergenic	1	193304745	193365953	61209	1	101929184	ENST00000420807.1	271341	ENSG00000232077	LINC01031	long intergenic non-protein coding RNA 1031
chr11	93848041	93848374	334	*	Peak_10191	36	.	Promoter (2-3kb)	11	93818232	93850531	32300	2	387804	ENST00000409977.1	2157	ENSG00000214376	VSTM5	V-set and transmembrane domain containing 5
chr11	93848873	93849572	700	*	Peak_1301	61	.	Promoter (<=1kb)	11	93818232	93850531	32300	2	387804	ENST00000409977.1	959	ENSG00000214376	VSTM5	V-set and transmembrane domain containing 5
chr11	93973836	93974128	293	*	Peak_3984	47	.	Distal Intergenic	11	94021361	94113751	92391	1	341208	ENST00000315765.9	-47233	ENSG00000181333	HEPHL1	hephaestin like 1
chr11	939958	940453	496	*	Peak_8376	39	.	Promoter (<=1kb)	11	940735	972216	31482	1	161	ENST00000527024.1	-282	ENSG00000183020	AP2A2	adaptor related protein complex 2 subunit alpha 2
chr11	93998094	93998529	436	*	Peak_14297	31	.	Distal Intergenic	11	94021361	94113751	92391	1	341208	ENST00000315765.9	-22832	ENSG00000181333	HEPHL1	hephaestin like 1
chr11	94008756	94009082	327	*	Peak_10421	35	.	Distal Intergenic	11	94021361	94113751	92391	1	341208	ENST00000315765.9	-12279	ENSG00000181333	HEPHL1	hephaestin like 1
chr11	94052611	94053014	404	*	Peak_3985	47	.	Intron (ENST00000315765.9/341208, intron 2 of 19)	11	94021361	94113751	92391	1	341208	ENST00000315765.9	31250	ENSG00000181333	HEPHL1	hephaestin like 1
chr11	94091334	94091611	278	*	Peak_10499	35	.	Intron (ENST00000315765.9/341208, intron 12 of 19)	11	94128928	94181972	53045	1	24145	ENST00000227638.7	-37317	ENSG00000110218	PANX1	pannexin 1
chr11	94091906	94092327	422	*	Peak_17889	26	.	Intron (ENST00000315765.9/341208, intron 12 of 19)	11	94128928	94181972	53045	1	24145	ENST00000227638.7	-36601	ENSG00000110218	PANX1	pannexin 1
chr11	94106577	94107099	523	*	Peak_1025	66	.	Intron (ENST00000315765.9/341208, intron 17 of 19)	11	94128928	94181972	53045	1	24145	ENST00000227638.7	-21829	ENSG00000110218	PANX1	pannexin 1
chr11	9415364	9415661	298	*	Peak_16021	29	.	Intron (ENST00000379719.7/10527, intron 5 of 24)	11	9420279	9420669	391	1	10527	ENST00000531235.1	-4618	ENSG00000205339	IPO7	importin 7
chr11	94236341	94236855	515	*	Peak_199	108	.	Distal Intergenic	11	94305592	94307692	2101	1	390243	ENST00000328458.5	-68737	ENSG00000183560	IZUMO1R	IZUMO1 receptor, JUNO
chr11	94237711	94238795	1085	*	Peak_436	83	.	Exon (ENST00000506309.6/ENST00000506309.6, exon 1 of 3)	11	94305592	94307692	2101	1	390243	ENST00000328458.5	-66797	ENSG00000183560	IZUMO1R	IZUMO1 receptor, JUNO
chr11	94313602	94314727	1126	*	Peak_2431	53	.	Distal Intergenic	11	94305593	94307721	2129	1	390243	ENST00000440961.6	8009	ENSG00000183560	IZUMO1R	IZUMO1 receptor, JUNO
chr11	94381684	94382111	428	*	Peak_5193	46	.	Intron (ENST00000243673.6/10888, intron 3 of 3)	11	94379531	94401392	21862	2	10888	ENST00000539203.2	19281	ENSG00000123901	GPR83	G protein-coupled receptor 83
chr11	94637310	94637559	250	*	Peak_699	73	.	Intron (ENST00000536540.5/105369438, intron 4 of 4)	11	94617789	94621113	3325	1	143689	ENST00000537419.1	19521	ENSG00000134627	PIWIL4	piwi like RNA-mediated gene silencing 4
chr11	94654236	94654617	382	*	Peak_15743	30	.	Intron (ENST00000536540.5/105369438, intron 4 of 4)	11	94617789	94621113	3325	1	143689	ENST00000537419.1	36447	ENSG00000134627	PIWIL4	piwi like RNA-mediated gene silencing 4
chr1	194780088	194780317	230	*	Peak_11479	34	.	Distal Intergenic	1	196044996	196061073	16078	2	105371673	ENST00000430519.1	1280756	NA	LINC01724	long intergenic non-protein coding RNA 1724
chr11	95057827	95058203	377	*	Peak_3063	51	.	Exon (ENST00000620602.1/ENST00000620602.1, exon 1 of 1)	11	95067197	95071224	4028	1	10929	ENST00000587424.2	-8994	ENSG00000263465	SRSF8	serine and arginine rich splicing factor 8
chr11	95157443	95157672	230	*	Peak_6895	41	.	Exon (ENST00000501356.5/101929295, exon 2 of 3)	11	95151746	95233690	81945	1	100129203	ENST00000534891.5	5697	NA	LOC100129203	uncharacterized LOC100129203
chr11	95285543	95285905	363	*	Peak_3653	47	.	Distal Intergenic	11	95232571	95234104	1534	1	100129203	ENST00000543573.1	52972	NA	LOC100129203	uncharacterized LOC100129203
chr11	95523014	95523253	240	*	Peak_17890	26	.	Distal Intergenic	11	95775854	95779204	3351	2	143684	ENST00000541418.1	255951	ENSG00000077458	FAM76B	family with sequence similarity 76 member B
chr11	95592877	95593152	276	*	Peak_6726	41	.	Intron (ENST00000648353.1/ENST00000648353.1, intron 3 of 4)	11	95775854	95779204	3351	2	143684	ENST00000541418.1	186052	ENSG00000077458	FAM76B	family with sequence similarity 76 member B
chr11	95593473	95594051	579	*	Peak_16303	28	.	Intron (ENST00000648353.1/ENST00000648353.1, intron 3 of 4)	11	95775854	95779204	3351	2	143684	ENST00000541418.1	185153	ENSG00000077458	FAM76B	family with sequence similarity 76 member B
chr11	95623204	95623605	402	*	Peak_15281	30	.	Intron (ENST00000648353.1/ENST00000648353.1, intron 3 of 4)	11	95775854	95779204	3351	2	143684	ENST00000541418.1	155599	ENSG00000077458	FAM76B	family with sequence similarity 76 member B
chr1	19566978	19567421	444	*	Peak_8459	39	.	Intron (ENST00000648702.1/440574, intron 1 of 3)	1	19591802	19596832	5031	2	105378614	ENST00000416470.1	29411	ENSG00000235185	LOC105378614	uncharacterized LOC105378614
chr1	195894671	195895067	397	*	Peak_11480	34	.	Distal Intergenic	1	196044996	196061073	16078	2	105371673	ENST00000430519.1	166006	NA	LINC01724	long intergenic non-protein coding RNA 1724
chr1	19686547	19686865	319	*	Peak_793	70	.	Intron (ENST00000294543.10/255104, intron 15 of 15)	1	19694492	19701210	6719	2	255104	ENST00000494342.1	14345	ENSG00000162542	TMCO4	transmembrane and coiled-coil domains 4
chr11	96869818	96870156	339	*	Peak_748	72	.	Distal Intergenic	11	96508425	96514748	6324	1	105369443	ENST00000543403.1	361393	ENSG00000256684	LOC105369443	uncharacterized LOC105369443
chr11	97291915	97292282	368	*	Peak_17565	27	.	Distal Intergenic	11	96508425	96514748	6324	1	105369443	ENST00000543403.1	783490	ENSG00000256684	LOC105369443	uncharacterized LOC105369443
chr1	197787994	197788523	530	*	Peak_2283	54	.	Distal Intergenic	1	197735658	197775696	40039	2	163486	ENST00000477581.1	-12298	ENSG00000213047	DENND1B	DENN domain containing 1B
chr11	97886966	97887395	430	*	Peak_14883	30	.	Intron (ENST00000526385.5/ENST00000526385.5, intron 3 of 3)	11	99020953	99049844	28892	1	53942	ENST00000525047.1	-1133558	ENSG00000149972	CNTN5	contactin 5
chr1	1980445	1981199	755	*	Peak_1334	60	.	Intron (ENST00000493964.5/85452, intron 6 of 37)	1	1987962	1990929	2968	2	85452	ENST00000378590.4	9730	ENSG00000142609	CFAP74	cilia and flagella associated protein 74
chr11	98136749	98137015	267	*	Peak_5457	45	.	Distal Intergenic	11	99020953	99049844	28892	1	53942	ENST00000525047.1	-883938	ENSG00000149972	CNTN5	contactin 5
chr11	98268576	98268901	326	*	Peak_15078	30	.	Distal Intergenic	11	99020953	99049844	28892	1	53942	ENST00000525047.1	-752052	ENSG00000149972	CNTN5	contactin 5
chr1	198316164	198316588	425	*	Peak_11485	34	.	Intron (ENST00000367385.8/140609, intron 9 of 9)	1	198277704	198319749	42046	1	140609	ENST00000493790.1	38460	ENSG00000151414	NEK7	NIMA related kinase 7
chr11	98409246	98409609	364	*	Peak_5741	44	.	Distal Intergenic	11	99020953	99049844	28892	1	53942	ENST00000525047.1	-611344	ENSG00000149972	CNTN5	contactin 5
chr11	9871897	9872241	345	*	Peak_1110	64	.	Intron (ENST00000533659.1/101928008, intron 1 of 2)	11	9808912	9839603	30692	2	81846	ENST00000530741.1	-32294	ENSG00000133812	SBF2	SET binding factor 2
chr11	98966877	98967857	981	*	Peak_5328	46	.	Distal Intergenic	11	99020953	99049844	28892	1	53942	ENST00000525047.1	-53096	ENSG00000149972	CNTN5	contactin 5
chr11	99795452	99795774	323	*	Peak_13418	33	.	Intron (ENST00000528727.5/53942, intron 3 of 15)	11	99819532	100358885	539354	1	53942	ENST00000279463.7	-23758	ENSG00000149972	CNTN5	contactin 5
chr11	99833658	99833960	303	*	Peak_7103	41	.	Intron (ENST00000528727.5/53942, intron 4 of 15)	11	99844808	100358885	514078	1	53942	ENST00000619298.1	-10848	ENSG00000149972	CNTN5	contactin 5
chr11	99849440	99849834	395	*	Peak_1941	57	.	Intron (ENST00000528727.5/53942, intron 6 of 15)	11	99844808	100358885	514078	1	53942	ENST00000619298.1	4632	ENSG00000149972	CNTN5	contactin 5
chr1	200000232	200000590	359	*	Peak_20441	20	.	Distal Intergenic	1	200027602	200177424	149823	1	2494	ENST00000367362.7	-27012	ENSG00000116833	NR5A2	nuclear receptor subfamily 5 group A member 2
chr1	200033162	200033749	588	*	Peak_11489	34	.	Intron (ENST00000367362.7/2494, intron 1 of 7)	1	200027883	200039769	11887	1	2494	ENST00000447034.1	5279	ENSG00000116833	NR5A2	nuclear receptor subfamily 5 group A member 2
chr1	200237433	200237913	481	*	Peak_1396	60	.	Distal Intergenic	1	200342544	200373792	31249	2	554279	ENST00000367355.5	135879	ENSG00000203721	LINC00862	long intergenic non-protein coding RNA 862
chr1	200565124	200565400	277	*	Peak_9058	38	.	Exon (ENST00000614960.4/9928, exon 24 of 29)	1	200551497	200618723	67227	2	9928	ENST00000614960.4	53323	ENSG00000118193	KIF14	kinesin family member 14
chr1	200706855	200707207	353	*	Peak_7529	40	.	Distal Intergenic	1	200739558	200860704	121147	1	23271	ENST00000358823.6	-32351	ENSG00000118200	CAMSAP2	calmodulin regulated spectrin associated protein family member 2
chr1	20090637	20090874	238	*	Peak_13053	34	.	3' UTR	1	20070295	20090828	20534	1	5322	ENST00000478803.1	20342	ENSG00000127472	PLA2G5	phospholipase A2 group V
chr1	200994315	200994638	324	*	Peak_2152	55	.	Intron (ENST00000332129.6/23046, intron 15 of 33)	1	201001407	201005590	4184	2	23046	ENST00000534043.1	10952	ENSG00000116852	KIF21B	kinesin family member 21B
chr1	201060362	201060639	278	*	Peak_10505	35	.	Intron (ENST00000367338.7/779, intron 26 of 42)	1	200973807	201023700	49894	2	23046	ENST00000422435.2	-36662	ENSG00000116852	KIF21B	kinesin family member 21B
chr1	20107170	20107399	230	*	Peak_17328	28	.	Distal Intergenic	1	20111939	20119557	7619	2	26279	ENST00000375105.7	12158	ENSG00000117215	PLA2G2D	phospholipase A2 group IID
chr1	201290998	201291895	898	*	Peak_14028	32	.	Intron (ENST00000263946.7/5317, intron 1 of 14)	1	201283703	201328836	45134	1	5317	ENST00000352845.3	7295	ENSG00000081277	PKP1	plakophilin 1
chr1	201313093	201313595	503	*	Peak_7104	41	.	Promoter (2-3kb)	1	201316192	201320172	3981	1	5317	ENST00000475988.1	-2597	ENSG00000081277	PKP1	plakophilin 1
chr1	20140689	20141170	482	*	Peak_1088	65	.	Promoter (1-2kb)	1	20139330	20144080	4751	1	64600	ENST00000465062.1	1359	ENSG00000158786	PLA2G2F	phospholipase A2 group IIF
chr1	202688936	202689389	454	*	Peak_6554	42	.	Intron (ENST00000367268.4/127833, intron 1 of 8)	1	202590596	202710417	119822	2	127833	ENST00000367268.4	21028	ENSG00000143858	SYT2	synaptotagmin 2
chr1	203498526	203499026	501	*	Peak_20046	22	.	Promoter (2-3kb)	1	203495970	203499709	3740	1	26254	ENST00000448911.1	2556	ENSG00000188770	OPTC	opticin
chr1	20370060	20370347	288	*	Peak_15607	30	.	Intron (ENST00000426428.5/339505, intron 10 of 11)	1	20332918	20354222	21305	1	127731	ENST00000525343.1	37142	ENSG00000158816	VWA5B1	von Willebrand factor A domain containing 5B1
chr1	203732608	203732992	385	*	Peak_17529	27	.	Intron (ENST00000357681.9/493, intron 20 of 20)	1	203729581	203729705	125	1	677843	ENST00000408716.1	3027	ENSG00000221643	SNORA77	small nucleolar RNA, H/ACA box 77
chr1	203743816	203744178	363	*	Peak_5418	45	.	3' UTR	1	203729581	203729705	125	1	677843	ENST00000408716.1	14235	ENSG00000221643	SNORA77	small nucleolar RNA, H/ACA box 77
chr1	2039946	2040739	794	*	Peak_6108	43	.	Distal Intergenic	1	2049203	2049651	449	2	105378591	ENST00000445600.1	8912	ENSG00000226969	LOC105378591	uncharacterized LOC105378591
chr1	2041695	2044436	2742	*	Peak_9	482	.	Distal Intergenic	1	2049203	2049651	449	2	105378591	ENST00000445600.1	5215	ENSG00000226969	LOC105378591	uncharacterized LOC105378591
chr1	204314559	204315042	484	*	Peak_6696	41	.	Intron (ENST00000272203.7/22874, intron 1 of 22)	1	204220756	204307395	86640	2	22874	ENST00000637508.1	-7164	ENSG00000143850	PLEKHA6	pleckstrin homology domain containing A6
chr1	204337968	204338233	266	*	Peak_8460	39	.	Intron (ENST00000272203.7/22874, intron 1 of 22)	1	204218851	204359916	141066	2	22874	ENST00000272203.7	21683	ENSG00000143850	PLEKHA6	pleckstrin homology domain containing A6
chr1	204393016	204393403	388	*	Peak_8685	39	.	Intron (ENST00000443515.1/ENST00000443515.1, intron 1 of 2)	1	204273626	204377665	104040	2	22874	ENST00000564627.2	-15351	ENSG00000143850	PLEKHA6	pleckstrin homology domain containing A6
chr1	204609030	204609280	251	*	Peak_11494	34	.	Intron (ENST00000453895.1/ENST00000453895.1, intron 1 of 2)	1	204542789	204549388	6600	1	4194	ENST00000444261.1	66241	ENSG00000198625	MDM4	MDM4 regulator of p53
chr1	204636805	204637064	260	*	Peak_13170	33	.	Intron (ENST00000367176.7/10446, intron 2 of 2)	1	204617170	204685353	68184	2	10446	ENST00000367176.7	48289	ENSG00000170382	LRRN2	leucine rich repeat neuronal 2
chr1	204730637	204730866	230	*	Peak_11495	34	.	Distal Intergenic	1	204617170	204685733	68564	2	10446	ENST00000367177.3	-44904	ENSG00000170382	LRRN2	leucine rich repeat neuronal 2
chr1	204799344	204799613	270	*	Peak_2433	53	.	Distal Intergenic	1	204828651	205010924	182274	1	23114	ENST00000404977.6	-29038	ENSG00000163531	NFASC	neurofascin
chr1	205484213	205484569	357	*	Peak_8841	38	.	Distal Intergenic	1	205504595	205531378	26784	1	5129	ENST00000429964.6	-20026	ENSG00000117266	CDK18	cyclin dependent kinase 18
chr1	205840294	205840523	230	*	Peak_5742	44	.	Promoter (1-2kb)	1	205828353	205841879	13527	2	148811	ENST00000461807.1	1356	ENSG00000162877	PM20D1	peptidase M20 domain containing 1
chr1	205989523	205989752	230	*	Peak_11496	34	.	Promoter (2-3kb)	1	205983743	205992580	8838	2	338382	ENST00000622969.1	2828	ENSG00000276600	RAB7B	RAB7B, member RAS oncogene family
chr1	206061272	206061778	507	*	Peak_11498	34	.	Exon (ENST00000647316.1/ENST00000647316.1, exon 4 of 5)	1	206052845	206062257	9413	1	440712	ENST00000582596.5	8427	ENSG00000263961	RHEX	regulator of hemoglobinization and erythroid cell expansion
chr1	206475879	206476219	341	*	Peak_3064	51	.	Promoter (1-2kb)	1	206474803	206474864	62	1	102466202	ENST00000622159.1	1076	ENSG00000278465	MIR6769B	microRNA 6769b
chr1	206885732	206886063	332	*	Peak_6602	42	.	Distal Intergenic	1	206897443	206903480	6038	1	11009	ENST00000391929.7	-11380	ENSG00000162892	IL24	interleukin 24
chr1	206937677	206938239	563	*	Peak_20254	22	.	Promoter (1-2kb)	1	206937546	206939466	1921	2	5284	ENST00000491503.1	1227	ENSG00000162896	PIGR	polymeric immunoglobulin receptor
chr1	207117546	207117810	265	*	Peak_4317	46	.	Intron (ENST00000367070.7/722, intron 4 of 11)	1	207104378	207115465	11088	1	722	ENST00000424088.1	13168	ENSG00000123838	C4BPA	complement component 4 binding protein alpha
chr1	208259206	208259590	385	*	Peak_5743	44	.	Distal Intergenic	1	208022242	208244320	222079	2	5362	ENST00000367033.3	-14886	ENSG00000076356	PLXNA2	plexin A2
chr1	208635664	208635893	230	*	Peak_4318	46	.	Distal Intergenic	1	208728688	208733184	4497	1	105372893	ENST00000415754.1	-92795	ENSG00000232812	LINC01717	long intergenic non-protein coding RNA 1717
chr1	20890466	20890795	330	*	Peak_3394	49	.	Intron (ENST00000374935.7/8672, intron 14 of 32)	1	20825104	20847945	22842	2	8672	ENST00000435383.1	-42521	ENSG00000075151	EIF4G3	eukaryotic translation initiation factor 4 gamma 3
chr1	209030496	209030815	320	*	Peak_1767	59	.	Distal Intergenic	1	208972454	208975307	2854	1	105372894	ENST00000453569.1	58042	ENSG00000236950	LINC01774	long intergenic non-protein coding RNA 1774
chr1	209188664	209188894	231	*	Peak_11502	34	.	Distal Intergenic	1	209325456	209328532	3077	1	105372897	ENST00000448988.1	-136562	ENSG00000227940	LINC01696	long intergenic non-protein coding RNA 1696
chr12	101259040	101259311	272	*	Peak_4322	46	.	Distal Intergenic	12	101280109	101386616	106508	1	27340	ENST00000261637.4	-20798	ENSG00000120800	UTP20	UTP20 small subunit processome component
chr12	102577372	102577691	320	*	Peak_7534	40	.	Distal Intergenic	12	102402328	102481744	79417	2	3479	ENST00000644491.1	-95628	ENSG00000017427	IGF1	insulin like growth factor 1
chr12	104440050	104440291	242	*	Peak_16314	28	.	Distal Intergenic	12	104456968	104602279	145312	1	50515	ENST00000547956.1	-16677	ENSG00000171310	CHST11	carbohydrate sulfotransferase 11
chr12	104442017	104442566	550	*	Peak_1399	60	.	Distal Intergenic	12	104456968	104602279	145312	1	50515	ENST00000547956.1	-14402	ENSG00000171310	CHST11	carbohydrate sulfotransferase 11
chr12	106191043	106191826	784	*	Peak_203	107	.	Distal Intergenic	12	106063340	106140033	76694	2	9891	ENST00000261402.6	-51010	ENSG00000074590	NUAK1	NUAK family kinase 1
chr12	106925991	106926538	548	*	Peak_11514	34	.	Distal Intergenic	12	106955719	106974036	18318	1	90488	ENST00000548125.5	-29181	ENSG00000151135	TMEM263	transmembrane protein 263
chr12	107304079	107304312	234	*	Peak_4323	46	.	Distal Intergenic	12	107318413	107659642	341230	1	121551	ENST00000280758.9	-14101	ENSG00000151136	BTBD11	BTB domain containing 11
chr12	107319274	107319611	338	*	Peak_8941	38	.	Promoter (<=1kb)	12	107319898	107610320	290423	1	121551	ENST00000550706.5	-287	ENSG00000151136	BTBD11	BTB domain containing 11
chr12	10752187	10752416	230	*	Peak_15284	30	.	Promoter (1-2kb)	12	10750234	10777388	27155	1	101928162	ENST00000541949.5	1953	ENSG00000256888	LINC02366	long intergenic non-protein coding RNA 2366
chr12	107893802	107894065	264	*	Peak_4324	46	.	Distal Intergenic	12	107903270	107903948	679	2	728739	ENST00000547904.1	9883	NA	LOC728739	programmed cell death 2 pseudogene
chr12	108362627	108362967	341	*	Peak_11515	34	.	Distal Intergenic	12	108291671	108339341	47671	2	1240	ENST00000550402.5	-23286	ENSG00000174600	CMKLR1	chemerin chemokine-like receptor 1
chr1	210891470	210891807	338	*	Peak_11516	34	.	Intron (ENST00000367007.5/3756, intron 7 of 11)	1	210919759	211019190	99432	2	3756	ENST00000639385.1	127383	ENSG00000143473	KCNH1	potassium voltage-gated channel subfamily H member 1
chr12	109141820	109142078	259	*	Peak_4325	46	.	Promoter (1-2kb)	12	109139979	109167280	27302	1	32	ENST00000546328.1	1841	ENSG00000076555	ACACB	acetyl-CoA carboxylase beta
chr12	109547172	109547468	297	*	Peak_5519	45	.	Distal Intergenic	12	109529930	109534538	4609	1	89910	ENST00000605142.1	17242	ENSG00000151148	UBE3B	ubiquitin protein ligase E3B
chr12	109559448	109559753	306	*	Peak_6857	41	.	Intron (ENST00000545712.6/326625, intron 7 of 8)	12	109573255	109581535	8281	1	4598	ENST00000539335.5	-13502	ENSG00000110921	MVK	mevalonate kinase
chr12	109605161	109605705	545	*	Peak_15744	30	.	Distal Intergenic	12	109587861	109597262	9402	1	4598	ENST00000540353.1	17300	ENSG00000110921	MVK	mevalonate kinase
chr12	110275566	110276130	565	*	Peak_2378	53	.	Distal Intergenic	12	110280756	110296712	15957	1	488	ENST00000552636.1	-4626	ENSG00000174437	ATP2A2	ATPase sarcoplasmic/endoplasmic reticulum Ca2+ transporting 2
chr1	211039183	211039443	261	*	Peak_14472	31	.	Intron (ENST00000367007.5/3756, intron 5 of 11)	1	210681647	211019228	337582	2	3756	ENST00000638357.1	-19955	ENSG00000143473	KCNH1	potassium voltage-gated channel subfamily H member 1
chr12	110417250	110417526	277	*	Peak_5419	45	.	Intron (ENST00000550231.1/51434, intron 1 of 4)	12	110375477	110403730	28254	2	51434	ENST00000450008.2	-13520	ENSG00000196510	ANAPC7	anaphase promoting complex subunit 7
chr1	211084288	211084703	416	*	Peak_4326	46	.	Intron (ENST00000367007.5/3756, intron 4 of 11)	1	211063392	211103515	40124	2	3756	ENST00000624583.2	18812	ENSG00000143473	KCNH1	potassium voltage-gated channel subfamily H member 1
chr12	110923911	110924202	292	*	Peak_15825	29	.	Distal Intergenic	12	110918829	110920722	1894	2	4633	ENST00000546404.1	-3189	ENSG00000111245	MYL2	myosin light chain 2
chr12	111033474	111033719	246	*	Peak_1402	60	.	Promoter (<=1kb)	12	111034024	111350554	316531	1	23316	ENST00000261726.10	-305	ENSG00000111249	CUX2	cut like homeobox 2
chr12	111036243	111036617	375	*	Peak_11518	34	.	Promoter (2-3kb)	12	111034024	111350554	316531	1	23316	ENST00000261726.10	2219	ENSG00000111249	CUX2	cut like homeobox 2
chr12	111046595	111047117	523	*	Peak_351	90	.	Intron (ENST00000261726.10/23316, intron 1 of 21)	12	111034024	111350554	316531	1	23316	ENST00000261726.10	12571	ENSG00000111249	CUX2	cut like homeobox 2
chr12	111080291	111080621	331	*	Peak_6252	43	.	Intron (ENST00000261726.10/23316, intron 1 of 21)	12	111099446	111295346	195901	1	23316	ENST00000397643.3	-18825	ENSG00000111249	CUX2	cut like homeobox 2
chr12	111774300	111774948	649	*	Peak_6388	42	.	Intron (ENST00000546840.2/217, intron 2 of 7)	12	111766948	111809630	42683	1	217	ENST00000548536.1	7352	ENSG00000111275	ALDH2	aldehyde dehydrogenase 2 family member
chr12	111889413	111889698	286	*	Peak_17567	27	.	Promoter (<=1kb)	12	111889233	111896539	7307	1	8550	ENST00000547915.1	180	ENSG00000089022	MAPKAPK5	MAPK activated protein kinase 5
chr12	112135593	112136002	410	*	Peak_11221	34	.	Intron (ENST00000412615.6/10906, intron 4 of 11)	12	112141953	112148213	6261	1	10906	ENST00000548277.1	-5951	ENSG00000135148	TRAFD1	TRAF-type zinc finger domain containing 1
chr12	112319528	112319822	295	*	Peak_1072	65	.	5' UTR	12	112249557	112273793	24237	2	283450	ENST00000311694.7	-45735	ENSG00000173064	HECTD4	HECT domain E3 ubiquitin protein ligase 4
chr12	112532851	112533207	357	*	Peak_9771	36	.	Distal Intergenic	12	112570380	112847731	277352	1	22895	ENST00000549736.5	-37173	ENSG00000089169	RPH3A	rabphilin 3A
chr12	112790673	112790979	307	*	Peak_19395	25	.	Promoter (<=1kb)	12	112791149	112868476	77328	1	22895	ENST00000547728.5	-170	ENSG00000089169	RPH3A	rabphilin 3A
chr12	112987543	112987907	365	*	Peak_3654	47	.	3' UTR	12	112978602	112998410	19809	1	4939	ENST00000551603.1	8941	ENSG00000111335	OAS2	2'-5'-oligoadenylate synthetase 2
chr12	113469533	113469848	316	*	Peak_10332	35	.	Promoter (2-3kb)	12	113472003	113480624	8622	1	104355219	ENST00000551357.2	-2155	NA	LHX5-AS1	LHX5 antisense RNA 1
chr12	113494823	113495137	315	*	Peak_6556	42	.	Distal Intergenic	12	113462034	113472072	10039	2	64211	ENST00000261731.3	-22751	ENSG00000089116	LHX5	LIM homeobox 5
chr12	113500198	113500520	323	*	Peak_8942	38	.	Distal Intergenic	12	113462034	113472072	10039	2	64211	ENST00000261731.3	-28126	ENSG00000089116	LHX5	LIM homeobox 5
chr12	113525479	113525861	383	*	Peak_10260	35	.	Distal Intergenic	12	113462034	113472072	10039	2	64211	ENST00000261731.3	-53407	ENSG00000089116	LHX5	LIM homeobox 5
chr12	113716849	113717158	310	*	Peak_13979	32	.	Intron (ENST00000550905.5/100506465, intron 2 of 3)	12	113737448	113767209	29762	2	100506465	ENST00000551982.1	50051	ENSG00000249550	LINC01234	long intergenic non-protein coding RNA 1234
chr1	211429650	211429879	230	*	Peak_11521	34	.	Intron (ENST00000423222.5/84791, intron 5 of 5)	1	211399258	211432534	33277	1	84791	ENST00000610948.1	30392	NA	LINC00467	long intergenic non-protein coding RNA 467
chr12	114448042	114448271	230	*	Peak_11522	34	.	Distal Intergenic	12	114408754	114412831	4078	1	255480	ENST00000528549.1	39288	NA	TBX5-AS1	TBX5 antisense RNA 1
chr12	114701664	114702079	416	*	Peak_9518	37	.	Distal Intergenic	12	114670254	114684164	13911	2	6926	ENST00000349155.6	-17500	ENSG00000135111	TBX3	T-box 3
chr12	114787284	114787670	387	*	Peak_6253	43	.	Distal Intergenic	12	114670254	114684164	13911	2	6926	ENST00000349155.6	-103120	ENSG00000135111	TBX3	T-box 3
chr1	211514115	211514380	266	*	Peak_1159	64	.	Distal Intergenic	1	211476522	211492917	16396	2	343035	ENST00000367002.4	-21198	ENSG00000198570	RD3	retinal degeneration 3, GUCY2D regulator
chr12	115254987	115255216	230	*	Peak_11524	34	.	Distal Intergenic	12	114670254	114684164	13911	2	6926	ENST00000349155.6	-570823	ENSG00000135111	TBX3	T-box 3
chr1	211528153	211528451	299	*	Peak_5531	45	.	Distal Intergenic	1	211476522	211492917	16396	2	343035	ENST00000367002.4	-35236	ENSG00000198570	RD3	retinal degeneration 3, GUCY2D regulator
chr12	11593308	11593540	233	*	Peak_16320	28	.	Distal Intergenic	12	11556966	11590369	33404	1	338817	ENST00000541162.1	36342	ENSG00000247157	LINC01252	long intergenic non-protein coding RNA 1252
chr12	116876172	116876408	237	*	Peak_5962	44	.	Promoter (2-3kb)	12	116869477	116878497	9021	2	8739	ENST00000586941.1	2089	ENSG00000135116	HRK	harakiri, BCL2 interacting protein
chr12	116898113	116898695	583	*	Peak_11090	35	.	Distal Intergenic	12	116910956	117028636	117681	1	26259	ENST00000309909.9	-12261	ENSG00000174989	FBXW8	F-box and WD repeat domain containing 8
chr12	118073746	118073986	241	*	Peak_11527	34	.	Promoter (<=1kb)	12	118070953	118073741	2789	2	54621	ENST00000545259.1	-5	ENSG00000176834	VSIG10	V-set and immunoglobulin domain containing 10
chr1	211922590	211922886	297	*	Peak_2438	53	.	Distal Intergenic	1	211941723	211966467	24745	2	25896	ENST00000612340.1	43581	ENSG00000143493	INTS7	integrator complex subunit 7
chr12	11964851	11965190	340	*	Peak_624	75	.	Distal Intergenic	12	11885937	11891610	5674	1	2120	ENST00000266427.3	78914	ENSG00000139083	ETV6	ETS variant 6
chr12	119952349	119952759	411	*	Peak_2439	53	.	Distal Intergenic	12	119989869	120094494	104626	1	92558	ENST00000397558.6	-37110	ENSG00000135127	BICDL1	BICD family like cargo adaptor 1
chr12	11997028	11997294	267	*	Peak_10512	35	.	Distal Intergenic	12	12049844	12099684	49841	1	79370	ENST00000589718.5	-52550	ENSG00000121380	BCL2L14	BCL2 like 14
chr12	120272466	120272703	238	*	Peak_11263	34	.	Distal Intergenic	12	120210447	120265771	55325	2	5829	ENST00000424649.6	-6695	ENSG00000089159	PXN	paxillin
chr12	120678260	120678682	423	*	Peak_10513	35	.	Distal Intergenic	12	120686869	120701864	14996	1	9761	ENST00000228506.7	-8187	ENSG00000110917	MLEC	malectin
chr12	120741738	120741967	230	*	Peak_9135	38	.	Intron (ENST00000542620.1/ENST00000542620.1, intron 1 of 2)	12	120725861	120739594	13734	1	35	ENST00000411593.2	15877	ENSG00000122971	ACADS	acyl-CoA dehydrogenase short chain
chr12	120867877	120868144	268	*	Peak_6730	41	.	Intron (ENST00000353487.6/121665, intron 1 of 10)	12	120782690	120835657	52968	2	121665	ENST00000543181.5	-32220	ENSG00000157837	SPPL3	signal peptide peptidase like 3
chr12	120981155	120981515	361	*	Peak_1335	60	.	Promoter (2-3kb)	12	120978749	121001269	22521	1	6927	ENST00000544413.2	2406	ENSG00000135100	HNF1A	HNF1 homeobox A
chr12	121164604	121164904	301	*	Peak_3097	51	.	Intron (ENST00000537312.5/5027, intron 4 of 10)	12	121132971	121184802	51832	1	5027	ENST00000541716.5	31633	ENSG00000089041	P2RX7	purinergic receptor P2X 7
chr12	122513696	122514113	418	*	Peak_5488	45	.	Promoter (<=1kb)	12	122505330	122513917	8588	2	65117	ENST00000392442.6	0	ENSG00000111011	RSRC2	arginine and serine rich coiled-coil 2
chr12	122866424	122867126	703	*	Peak_11091	35	.	3' UTR	12	122870075	122871681	1607	2	79720	ENST00000543590.1	4555	ENSG00000139722	VPS37B	VPS37B subunit of ESCRT-I
chr12	123005178	123005537	360	*	Peak_6603	42	.	Promoter (<=1kb)	12	122997438	123006120	8683	2	57605	ENST00000436074.6	583	ENSG00000090975	PITPNM2	phosphatidylinositol transfer protein membrane associated 2
chr12	123117881	123118110	230	*	Peak_2386	53	.	Intron (ENST00000542210.1/57605, intron 1 of 3)	12	122983480	123110495	127016	2	57605	ENST00000280562.9	-7386	ENSG00000090975	PITPNM2	phosphatidylinositol transfer protein membrane associated 2
chr12	123560272	123560588	317	*	Peak_3144	51	.	Distal Intergenic	12	123536409	123536534	126	1	100500909	ENST00000579798.1	23863	ENSG00000266655	MIR3908	microRNA 3908
chr12	123762688	123763022	335	*	Peak_11531	34	.	Promoter (<=1kb)	12	123762495	123935718	173224	1	196385	ENST00000638045.1	193	ENSG00000197653	DNAH10	dynein axonemal heavy chain 10
chr12	123774963	123775321	359	*	Peak_4334	46	.	Intron (ENST00000409039.7/196385, intron 5 of 77)	12	123781104	123814257	33154	1	196385	ENST00000467219.5	-5783	ENSG00000197653	DNAH10	dynein axonemal heavy chain 10
chr12	123931416	123931930	515	*	Peak_7539	40	.	Promoter (<=1kb)	12	123931791	123933439	1649	1	196385	ENST00000538983.1	0	ENSG00000197653	DNAH10	dynein axonemal heavy chain 10
chr12	124099443	124099937	495	*	Peak_4335	46	.	Intron (ENST00000389727.8/100533183, intron 2 of 4)	12	123997706	124011824	14119	1	144348	ENST00000539501.1	101737	ENSG00000179195	ZNF664	zinc finger protein 664
chr12	124125753	124126552	800	*	Peak_16321	28	.	Intron (ENST00000389727.8/100533183, intron 2 of 4)	12	123997706	124011824	14119	1	144348	ENST00000539501.1	128047	ENSG00000179195	ZNF664	zinc finger protein 664
chr12	124208451	124208831	381	*	Peak_2735	53	.	Exon (ENST00000539391.1/ENST00000539391.1, exon 2 of 2)	12	124289164	124316022	26859	1	144347	ENST00000324038.6	-80333	ENSG00000178882	RFLNA	refilin A
chr12	124254589	124254883	295	*	Peak_7540	40	.	Intron (ENST00000389727.8/100533183, intron 3 of 4)	12	124289164	124316022	26859	1	144347	ENST00000324038.6	-34281	ENSG00000178882	RFLNA	refilin A
chr12	124258951	124259249	299	*	Peak_9520	37	.	Intron (ENST00000389727.8/100533183, intron 3 of 4)	12	124289164	124316022	26859	1	144347	ENST00000324038.6	-29915	ENSG00000178882	RFLNA	refilin A
chr12	124326678	124327107	430	*	Peak_8408	39	.	Promoter (<=1kb)	12	124325420	124327585	2166	2	9612	ENST00000413172.1	478	ENSG00000196498	NCOR2	nuclear receptor corepressor 2
chr12	124469259	124469518	260	*	Peak_5532	45	.	Intron (ENST00000405201.5/9612, intron 4 of 46)	12	124430641	124483769	53129	2	9612	ENST00000448008.1	14251	ENSG00000196498	NCOR2	nuclear receptor corepressor 2
chr12	125078159	125078588	430	*	Peak_14721	31	.	Exon (ENST00000418937.6/65985, exon 4 of 9)	12	125091013	125107154	16142	1	65985	ENST00000537477.5	-12425	ENSG00000081760	AACS	acetoacetyl-CoA synthetase
chr12	12654872	12655140	269	*	Peak_12854	34	.	Distal Intergenic	12	12660891	12684521	23631	2	2842	ENST00000540510.1	29381	ENSG00000183150	GPR19	G protein-coupled receptor 19
chr12	12678720	12678968	249	*	Peak_1404	60	.	Intron (ENST00000539988.1/ENST00000539988.1, intron 1 of 1)	12	12660891	12684521	23631	2	2842	ENST00000540510.1	5553	ENSG00000183150	GPR19	G protein-coupled receptor 19
chr1	212727108	212727347	240	*	Peak_5834	44	.	3' UTR	1	212686418	212699985	13568	2	55509	ENST00000243440.1	-27123	ENSG00000123685	BATF3	basic leucine zipper ATF-like transcription factor 3
chr12	131031080	131031376	297	*	Peak_4337	46	.	Intron (ENST00000261654.9/283383, intron 13 of 24)	12	131002499	131141460	138962	1	283383	ENST00000376682.8	28581	ENSG00000111452	ADGRD1	adhesion G protein-coupled receptor D1
chr12	131493642	131494329	688	*	Peak_16323	28	.	Distal Intergenic	12	131347470	131367555	20086	1	338797	ENST00000428272.4	146172	NA	LINC02370	long intergenic non-protein coding RNA 2370
chr12	1318714	1319103	390	*	Peak_16324	28	.	Intron (ENST00000543086.7/23085, intron 14 of 17)	12	1257138	1371952	114815	1	23085	ENST00000543263.2	61576	ENSG00000082805	ERC1	ELKS/RAB6-interacting/CAST family member 1
chr12	131908553	131908921	369	*	Peak_15608	30	.	Promoter (<=1kb)	12	131908619	131909169	551	1	8408	ENST00000542313.2	0	ENSG00000177169	ULK1	unc-51 like autophagy activating kinase 1
chr12	132170636	132170952	317	*	Peak_1201	63	.	Distal Intergenic	12	132186735	132189695	2961	2	100996246	ENST00000538731.2	18743	ENSG00000256576	LINC02361	long intergenic non-protein coding RNA 2361
chr12	132306210	132306690	481	*	Peak_8944	38	.	Intron (ENST00000328957.12/50614, intron 1 of 10)	12	132283164	132286471	3308	2	50614	ENST00000540493.1	-19739	ENSG00000182870	GALNT9	polypeptide N-acetylgalactosaminyltransferase 9
chr12	132323982	132324570	589	*	Peak_5884	44	.	Intron (ENST00000328957.12/50614, intron 1 of 10)	12	132196509	132329203	132695	2	50614	ENST00000328957.12	4633	ENSG00000182870	GALNT9	polypeptide N-acetylgalactosaminyltransferase 9
chr12	132375125	132375365	241	*	Peak_7543	40	.	Distal Intergenic	12	132329850	132331575	1726	1	101928416	ENST00000537720.1	45275	ENSG00000255916	LOC101928416	uncharacterized LOC101928416
chr12	132399225	132399640	416	*	Peak_14163	32	.	Distal Intergenic	12	132329850	132331575	1726	1	101928416	ENST00000537720.1	69375	ENSG00000255916	LOC101928416	uncharacterized LOC101928416
chr12	132485040	132485331	292	*	Peak_3809	47	.	Distal Intergenic	12	132489551	132585188	95638	1	57666	ENST00000434748.2	-4220	ENSG00000112787	FBRSL1	fibrosin like 1
chr12	132616550	132616925	376	*	Peak_1757	59	.	Promoter (1-2kb)	12	132618776	132622386	3611	1	22953	ENST00000643471.1	-1851	ENSG00000187848	P2RX2	purinergic receptor P2X 2
chr1	213612712	213613132	421	*	Peak_7545	40	.	Distal Intergenic	1	213832591	213841041	8451	2	100505832	ENST00000609394.5	227909	NA	PROX1-AS1	PROX1 antisense RNA 1
chr1	213978240	213978671	432	*	Peak_3098	51	.	Promoter (<=1kb)	1	213915935	213979385	63451	2	100505832	ENST00000601854.5	714	NA	PROX1-AS1	PROX1 antisense RNA 1
chr12	1465200	1465458	259	*	Peak_14723	31	.	Intron (ENST00000543086.7/23085, intron 17 of 17)	12	1443291	1491079	47789	1	23085	ENST00000543151.1	21909	ENSG00000082805	ERC1	ELKS/RAB6-interacting/CAST family member 1
chr1	21469542	21469867	326	*	Peak_3995	47	.	Promoter (<=1kb)	1	21468550	21483412	14863	1	84224	ENST00000619554.1	992	ENSG00000142794	NBPF3	NBPF member 3
chr1	214880765	214881011	247	*	Peak_3996	47	.	Distal Intergenic	1	215005775	215236020	230246	1	3776	ENST00000486921.5	-124764	ENSG00000082482	KCNK2	potassium two pore domain channel subfamily K member 2
chr1	215186740	215187005	266	*	Peak_10517	35	.	Intron (ENST00000486921.5/3776, intron 4 of 6)	1	215083517	215169265	85749	1	3776	ENST00000457122.1	103223	ENSG00000082482	KCNK2	potassium two pore domain channel subfamily K member 2
chr1	21532781	21533078	298	*	Peak_5949	44	.	Intron (ENST00000374840.7/249, intron 1 of 11)	1	21551279	21578012	26734	1	249	ENST00000374832.5	-18201	ENSG00000162551	ALPL	alkaline phosphatase, biomineralization associated
chr12	1622686	1623049	364	*	Peak_15288	30	.	Intron (ENST00000539198.5/81029, intron 1 of 3)	12	1617056	1647211	30156	1	81029	ENST00000310594.7	5630	ENSG00000111186	WNT5B	Wnt family member 5B
chr1	217569366	217569627	262	*	Peak_1406	60	.	Intron (ENST00000366935.7/55105, intron 5 of 9)	1	217498180	217610379	112200	2	55105	ENST00000485274.1	40752	ENSG00000092978	GPATCH2	G-patch domain containing 2
chr1	217971329	217971578	250	*	Peak_11539	34	.	Distal Intergenic	1	218043505	218059140	15636	1	101929631	ENST00000456026.1	-71927	ENSG00000232100	LINC01653	long intergenic non-protein coding RNA 1653
chr12	1841081	1841368	288	*	Peak_7058	41	.	Intron (ENST00000382722.9/93589, intron 25 of 37)	12	1791963	1854037	62075	2	93589	ENST00000537784.5	12669	ENSG00000151062	CACNA2D4	calcium voltage-gated channel auxiliary subunit alpha2delta 4
chr1	218714089	218714472	384	*	Peak_9059	38	.	Distal Intergenic	1	218524840	218525978	1139	1	440714	ENST00000491260.2	189249	ENSG00000228208	C1orf143	chromosome 1 open reading frame 143 (putative)
chr12	19010879	19011108	230	*	Peak_16328	28	.	Distal Intergenic	12	19129752	19202003	72252	1	54477	ENST00000540972.5	-118644	ENSG00000052126	PLEKHA5	pleckstrin homology domain containing A5
chr12	1918018	1918428	411	*	Peak_6557	42	.	Promoter (<=1kb)	12	1795109	1918473	123365	2	93589	ENST00000586184.5	45	ENSG00000151062	CACNA2D4	calcium voltage-gated channel auxiliary subunit alpha2delta 4
chr12	19537325	19537722	398	*	Peak_20449	20	.	Intron (ENST00000512223.6/121536, intron 4 of 4)	12	19500129	19553272	53144	1	121536	ENST00000398731.3	37196	ENSG00000139154	AEBP2	AE binding protein 2
chr1	22016628	22016932	305	*	Peak_2308	54	.	Intron (ENST00000650360.1/10136, intron 7 of 8)	1	22024558	22031223	6666	1	29092	ENST00000635675.2	-7626	ENSG00000218510	LINC00339	long intergenic non-protein coding RNA 339
chr1	220287802	220288479	678	*	Peak_13980	32	.	Distal Intergenic	1	220148293	220272454	124162	2	25782	ENST00000358951.6	-15348	ENSG00000118873	RAB3GAP2	RAB3 GTPase activating non-catalytic protein subunit 2
chr1	220406510	220406778	269	*	Peak_11543	34	.	Distal Intergenic	1	220528183	220664456	136274	1	4139	ENST00000402574.5	-121405	ENSG00000116141	MARK1	microtubule affinity regulating kinase 1
chr1	220483889	220484123	235	*	Peak_19748	24	.	Distal Intergenic	1	220528183	220664456	136274	1	4139	ENST00000402574.5	-44060	ENSG00000116141	MARK1	microtubule affinity regulating kinase 1
chr1	220518029	220518320	292	*	Peak_9521	37	.	Distal Intergenic	1	220528183	220664456	136274	1	4139	ENST00000402574.5	-9863	ENSG00000116141	MARK1	microtubule affinity regulating kinase 1
chr1	220972406	220972635	230	*	Peak_4346	46	.	Distal Intergenic	1	220881069	220884493	3425	1	3142	ENST00000427693.1	91337	ENSG00000136630	HLX	H2.0 like homeobox
chr1	221353410	221353661	252	*	Peak_7547	40	.	Distal Intergenic	1	221330080	221336296	6217	2	400804	ENST00000439004.1	-17114	ENSG00000234754	C1orf140	uncharacterized LOC400804
chr1	221371859	221372091	233	*	Peak_3997	47	.	Distal Intergenic	1	221330080	221336296	6217	2	400804	ENST00000439004.1	-35563	ENSG00000234754	C1orf140	uncharacterized LOC400804
chr12	21393	21687	295	*	Peak_291	96	.	Intron (ENST00000400706.3/100288778, intron 2 of 10)	12	14522	32015	17494	2	100288778	ENST00000400706.3	10328	ENSG00000226210	WASH8P	WAS protein family homolog 8, pseudogene
chr1	221641540	221641919	380	*	Peak_10155	36	.	Distal Intergenic	1	221702427	221711816	9390	2	11221	ENST00000494642.1	69897	ENSG00000143507	DUSP10	dual specificity phosphatase 10
chr1	221705906	221706443	538	*	Peak_6254	43	.	5' UTR	1	221702427	221711816	9390	2	11221	ENST00000494642.1	5373	ENSG00000143507	DUSP10	dual specificity phosphatase 10
chr1	22192380	22192781	402	*	Peak_10522	35	.	Distal Intergenic	1	22127474	22143969	16496	2	54361	ENST00000441048.1	-48411	ENSG00000162552	WNT4	Wnt family member 4
chr1	22198621	22199169	549	*	Peak_1689	59	.	Distal Intergenic	1	22127474	22143969	16496	2	54361	ENST00000441048.1	-54652	ENSG00000162552	WNT4	Wnt family member 4
chr1	222056559	222056877	319	*	Peak_5744	44	.	Intron (ENST00000438158.1/ENST00000438158.1, intron 2 of 2)	1	221913648	221978523	64876	2	105372950	ENST00000412445.1	-78036	ENSG00000238042	LINC02257	long intergenic non-protein coding RNA 2257
chr1	222344297	222344790	494	*	Peak_3877	47	.	Intron (ENST00000416510.1/ENST00000416510.1, intron 2 of 3)	1	222522258	222525239	2982	2	79802	ENST00000473144.5	180449	ENSG00000143512	HHIPL2	HHIP like 2
chr1	222458534	222458854	321	*	Peak_3075	51	.	Distal Intergenic	1	222522258	222525239	2982	2	79802	ENST00000473144.5	66385	ENSG00000143512	HHIPL2	HHIP like 2
chr1	222608666	222608937	272	*	Peak_4349	46	.	Distal Intergenic	1	222618086	222668012	49927	1	375056	ENST00000344922.9	-9149	ENSG00000154305	MIA3	MIA SH3 domain ER export factor 3
chr12	2273288	2273517	230	*	Peak_11545	34	.	Intron (ENST00000335762.9/775, intron 3 of 47)	12	2269776	2288937	19162	1	100874370	ENST00000542680.1	3512	NA	CACNA1C-IT3	CACNA1C intronic transcript 3
chr1	223237941	223238269	329	*	Peak_18785	25	.	Intron (ENST00000343846.7/55061, intron 4 of 7)	1	223227615	223230747	3133	2	55061	ENST00000470249.1	-7194	ENSG00000143502	SUSD4	sushi domain containing 4
chr1	223245708	223246020	313	*	Peak_10525	35	.	Intron (ENST00000343846.7/55061, intron 4 of 7)	1	223227615	223230747	3133	2	55061	ENST00000470249.1	-14961	ENSG00000143502	SUSD4	sushi domain containing 4
chr1	22332292	22332521	230	*	Peak_17898	26	.	Distal Intergenic	1	22266239	22266300	62	1	100616433	ENST00000581169.1	66053	ENSG00000266564	MIR4418	microRNA 4418
chr1	223394660	223394989	330	*	Peak_8945	38	.	Promoter (1-2kb)	1	223393417	223395470	2054	1	164127	ENST00000366875.4	1243	ENSG00000178395	CCDC185	coiled-coil domain containing 185
chr1	224161827	224162123	297	*	Peak_9522	37	.	3' UTR	1	224175756	224192353	16598	1	8560	ENST00000415210.5	-13633	ENSG00000143753	DEGS1	delta 4-desaturase, sphingolipid 1
chr1	224366450	224366682	233	*	Peak_7548	40	.	Intron (ENST00000465271.5/29097, intron 3 of 4)	1	224356921	224371297	14377	1	29097	ENST00000477413.1	9529	ENSG00000143771	CNIH4	cornichon family AMPA receptor auxiliary protein 4
chr1	224554031	224554297	267	*	Peak_10526	35	.	Intron (ENST00000471578.5/149111, intron 3 of 5)	1	224565365	224588555	23191	1	149111	ENST00000492470.1	-11068	ENSG00000143786	CNIH3	cornichon family AMPA receptor auxiliary protein 3
chr12	2496240	2496515	276	*	Peak_4353	46	.	Intron (ENST00000335762.9/775, intron 7 of 47)	12	2504436	2566582	62147	1	775	ENST00000491104.1	-7921	ENSG00000151067	CACNA1C	calcium voltage-gated channel subunit alpha1 C
chr1	225282145	225282392	248	*	Peak_7552	40	.	Intron (ENST00000445597.6/127602, intron 34 of 60)	1	225250663	225270796	20134	1	127602	ENST00000450490.1	31482	ENSG00000185842	DNAH14	dynein axonemal heavy chain 14
chr12	25342247	25342799	553	*	Peak_18786	25	.	Distal Intergenic	12	25209168	25250936	41769	2	3845	ENST00000557334.5	-91311	ENSG00000133703	KRAS	KRAS proto-oncogene, GTPase
chr1	225375775	225376044	270	*	Peak_11551	34	.	Intron (ENST00000445597.6/127602, intron 53 of 60)	1	225389740	225399292	9553	1	127602	ENST00000428003.2	-13696	ENSG00000185842	DNAH14	dynein axonemal heavy chain 14
chr1	225936163	225936506	344	*	Peak_6897	41	.	Exon (ENST00000513672.1/ENST00000513672.1, exon 2 of 2)	1	225939432	225940101	670	2	7044	ENST00000474493.1	3595	ENSG00000143768	LEFTY2	left-right determination factor 2
chr1	226041907	226042136	230	*	Peak_9340	37	.	Distal Intergenic	1	226061851	226071523	9673	1	440926	ENST00000366816.5	-19715	NA	H3F3AP4	H3 histone, family 3A, pseudogene 4
chr12	26142944	26143392	449	*	Peak_14617	31	.	Intron (ENST00000538142.5/8082, intron 1 of 2)	12	26134967	26231146	96180	1	8082	ENST00000540266.5	7977	ENSG00000123096	SSPN	sarcospan
chr1	226224014	226224615	602	*	Peak_6647	42	.	Promoter (<=1kb)	1	226223618	226227054	3437	1	83881	ENST00000366810.5	396	ENSG00000185155	MIXL1	Mix paired-like homeobox
chr1	226379884	226380113	230	*	Peak_9116	38	.	Exon (ENST00000366794.9/142, exon 10 of 23)	1	226361295	226371115	9821	2	142	ENST00000490921.5	-8769	ENSG00000143799	PARP1	poly(ADP-ribose) polymerase 1
chr1	226490846	226491311	466	*	Peak_823	70	.	Distal Intergenic	1	226548800	226605602	56803	1	375057	ENST00000366789.5	-57489	ENSG00000203685	STUM	stum, mechanosensory transduction mediator homolog
chr1	22649208	22649516	309	*	Peak_9774	36	.	Distal Intergenic	1	22652762	22661090	8329	1	713	ENST00000510260.5	-3246	ENSG00000173369	C1QB	complement C1q B chain
chr12	26492143	26492383	241	*	Peak_11553	34	.	Promoter (1-2kb)	12	26387542	26494233	106692	2	3709	ENST00000451599.6	1850	ENSG00000123104	ITPR2	inositol 1,4,5-trisphosphate receptor type 2
chr1	226564193	226564478	286	*	Peak_6697	41	.	Intron (ENST00000366789.5/375057, intron 1 of 3)	1	226548800	226609214	60415	1	375057	ENST00000366788.7	15393	ENSG00000203685	STUM	stum, mechanosensory transduction mediator homolog
chr1	226572523	226573325	803	*	Peak_2891	52	.	Intron (ENST00000366789.5/375057, intron 1 of 3)	1	226548800	226609214	60415	1	375057	ENST00000366788.7	23723	ENSG00000203685	STUM	stum, mechanosensory transduction mediator homolog
chr1	226752349	226752714	366	*	Peak_13336	33	.	Distal Intergenic	1	226707190	226739323	32134	2	3707	ENST00000366784.1	-13026	ENSG00000143772	ITPKB	inositol-trisphosphate 3-kinase B
chr1	226977088	226978060	973	*	Peak_1207	63	.	Promoter (<=1kb)	1	226977404	226987544	10141	1	56997	ENST00000485462.5	0	ENSG00000163050	COQ8A	coenzyme Q8A
chr12	27397641	27397987	347	*	Peak_18788	25	.	Intron (ENST00000544915.5/56938, intron 8 of 15)	12	27368336	27420590	52255	1	56938	ENST00000542388.1	29305	ENSG00000029153	ARNTL2	aryl hydrocarbon receptor nuclear translocator like 2
chr1	227511429	227511774	346	*	Peak_16337	28	.	Distal Intergenic	1	227563543	227662461	98919	1	339500	ENST00000343776.9	-51769	ENSG00000181450	ZNF678	zinc finger protein 678
chr12	2760517	2760796	280	*	Peak_11554	34	.	Intron (ENST00000636122.1/283440, intron 3 of 5)	12	2761200	2775658	14459	2	283440	ENST00000637160.1	14862	ENSG00000256150	ITFG2-AS1	ITFG2 antisense RNA 1
chr12	27770563	27771147	585	*	Peak_6255	43	.	Promoter (<=1kb)	12	27762738	27771276	8539	2	100287284	ENST00000381273.3	129	ENSG00000205693	MANSC4	MANSC domain containing 4
chr1	227811482	227811797	316	*	Peak_10262	35	.	Distal Intergenic	1	227815693	227846470	30778	1	339501	ENST00000366757.3	-3896	ENSG00000185888	PRSS38	serine protease 38
chr1	227815677	227816015	339	*	Peak_10263	35	.	Promoter (<=1kb)	1	227815693	227846470	30778	1	339501	ENST00000366757.3	0	ENSG00000185888	PRSS38	serine protease 38
chr1	227850884	227851255	372	*	Peak_4355	46	.	Distal Intergenic	1	227815693	227846470	30778	1	339501	ENST00000366757.3	35191	ENSG00000185888	PRSS38	serine protease 38
chr1	227884470	227884853	384	*	Peak_17899	26	.	Distal Intergenic	1	227941590	227941683	94	2	100847072	ENST00000584300.1	56830	ENSG00000264483	MIR5008	microRNA 5008
chr1	22806297	22806674	378	*	Peak_9911	36	.	Intron (ENST00000544305.5/2048, intron 3 of 6)	1	22800240	22896478	96239	1	2048	ENST00000465676.1	6057	ENSG00000133216	EPHB2	EPH receptor B2
chr1	228307981	228308268	288	*	Peak_1878	58	.	Exon (ENST00000284548.15/84033, exon 47 of 81)	1	228303609	228304344	736	1	84033	ENST00000602832.1	4372	ENSG00000154358	OBSCN	obscurin, cytoskeletal calmodulin and titin-interacting RhoGEF
chr1	228529883	228530222	340	*	Peak_2444	53	.	Distal Intergenic	1	228510425	228512305	1881	2	100129094	ENST00000595971.3	-17578	ENSG00000215811	BTNL10	butyrophilin like 10
chr1	228540262	228540507	246	*	Peak_2736	53	.	Distal Intergenic	1	228510425	228512305	1881	2	100129094	ENST00000595971.3	-27957	ENSG00000215811	BTNL10	butyrophilin like 10
chr1	228549551	228549780	230	*	Peak_11556	34	.	Distal Intergenic	1	228510425	228512305	1881	2	100129094	ENST00000595971.3	-37246	ENSG00000215811	BTNL10	butyrophilin like 10
chr12	28588086	28588315	230	*	Peak_13269	33	.	Distal Intergenic	12	28452542	28573446	120905	1	55297	ENST00000542801.5	135544	ENSG00000123106	CCDC91	coiled-coil domain containing 91
chr1	228635448	228635678	231	*	Peak_4001	47	.	Distal Intergenic	1	228630390	228630508	119	2	100169768	ENST00000363040.1	-4940	ENSG00000200370	RNA5S17	RNA, 5S ribosomal 17
chr1	228659101	228659481	381	*	Peak_10264	35	.	Distal Intergenic	1	228646040	228646158	119	2	100169768	ENST00000363500.1	-12943	ENSG00000200370	RNA5S17	RNA, 5S ribosomal 17
chr1	228770729	228771064	336	*	Peak_11558	34	.	Distal Intergenic	1	228735077	228746669	11593	1	58480	ENST00000366691.3	35652	ENSG00000116574	RHOU	ras homolog family member U
chr1	228778704	228779208	505	*	Peak_4356	46	.	Distal Intergenic	1	228735077	228746669	11593	1	58480	ENST00000366691.3	43627	ENSG00000116574	RHOU	ras homolog family member U
chr1	228932063	228932602	540	*	Peak_4357	46	.	Distal Intergenic	1	228735077	228746669	11593	1	58480	ENST00000366691.3	196986	ENSG00000116574	RHOU	ras homolog family member U
chr1	228980104	228980466	363	*	Peak_7554	40	.	Distal Intergenic	1	228735077	228746669	11593	1	58480	ENST00000366691.3	245027	ENSG00000116574	RHOU	ras homolog family member U
chr1	229108224	229108701	478	*	Peak_294	95	.	Distal Intergenic	1	229258281	229271003	12723	2	105373159	ENST00000429227.1	162302	NA	LOC105373159	uncharacterized LOC105373159
chr1	229135172	229135890	719	*	Peak_1895	58	.	Distal Intergenic	1	229258281	229271003	12723	2	105373159	ENST00000429227.1	135113	NA	LOC105373159	uncharacterized LOC105373159
chr1	22914183	22914505	323	*	Peak_2074	56	.	3' UTR	1	22953049	22963178	10130	2	646262	ENST00000618559.1	48673	ENSG00000215906	LACTBL1	lactamase beta like 1
chr1	229207528	229207869	342	*	Peak_4004	47	.	Distal Intergenic	1	229258281	229271003	12723	2	105373159	ENST00000429227.1	63134	NA	LOC105373159	uncharacterized LOC105373159
chr12	29356960	29357304	345	*	Peak_16338	28	.	Promoter (<=1kb)	12	29341020	29357668	16649	2	51290	ENST00000551467.5	364	ENSG00000087502	ERGIC2	ERGIC and golgi 2
chr1	230002191	230002798	608	*	Peak_5352	46	.	Promoter (<=1kb)	1	230002730	230007162	4433	1	101927532	ENST00000445339.1	0	ENSG00000228058	LINC01736	long intergenic non-protein coding RNA 1736
chr1	230289890	230290203	314	*	Peak_3879	47	.	Distal Intergenic	1	230261951	230264972	3022	1	2590	ENST00000492568.1	27939	ENSG00000143641	GALNT2	polypeptide N-acetylgalactosaminyltransferase 2
chr1	230489882	230490293	412	*	Peak_1410	60	.	Distal Intergenic	1	230314482	230426371	111890	2	79605	ENST00000391860.6	-63511	ENSG00000177614	PGBD5	piggyBac transposable element derived 5
chr12	30816185	30816488	304	*	Peak_1411	60	.	Exon (ENST00000648050.1/100287314, exon 5 of 5)	12	30800211	30801997	1787	1	100287314	ENST00000551972.1	15974	NA	LINC00941	long intergenic non-protein coding RNA 941
chr12	30870820	30871132	313	*	Peak_4360	46	.	Intron (ENST00000648700.1/100287314, intron 2 of 2)	12	30926428	30955260	28833	1	441631	ENST00000545802.1	-55296	ENSG00000110900	TSPAN11	tetraspanin 11
chr1	231107929	231108477	549	*	Peak_18597	25	.	Distal Intergenic	1	231162112	231221556	59445	1	440730	ENST00000444294.7	-53635	ENSG00000119283	TRIM67	tripartite motif containing 67
chr12	31219588	31220130	543	*	Peak_2445	53	.	Distal Intergenic	12	31112236	31201235	89000	2	144203	ENST00000641844.2	-18353	ENSG00000177359	OVOS2	alpha-2-macroglobulin like 1 pseudogene
chr1	231473972	231474386	415	*	Peak_7110	41	.	Promoter (1-2kb)	1	231475956	231476288	333	2	645339	ENST00000473818.1	1902	NA	SNRPD2P2	small nuclear ribonucleoprotein D2 pseudogene 2
chr1	231503053	231503470	418	*	Peak_1848	58	.	Distal Intergenic	1	231528653	231750619	221967	1	100303453	ENST00000647072.1	-25183	ENSG00000270106	TSNAX-DISC1	TSNAX-DISC1 readthrough (NMD candidate)
chr1	231891565	231891924	360	*	Peak_9049	38	.	Intron (ENST00000628350.2/27185, intron 6 of 6)	1	231925834	231945233	19400	1	104472714	ENST00000456782.1	-33910	ENSG00000226758	DISC1-IT1	DISC1 intronic transcript 1
chr12	31916584	31916830	247	*	Peak_11563	34	.	Distal Intergenic	12	31877079	31887203	10125	2	105369723	ENST00000535163.1	-29381	ENSG00000255760	LINC02422	long intergenic non-protein coding RNA 2422
chr1	232062755	232063142	388	*	Peak_2210	54	.	Distal Intergenic	1	231925834	231945233	19400	1	104472714	ENST00000456782.1	136921	ENSG00000226758	DISC1-IT1	DISC1 intronic transcript 1
chr1	232105912	232106358	447	*	Peak_17903	26	.	Distal Intergenic	1	231925834	231945233	19400	1	104472714	ENST00000456782.1	180078	ENSG00000226758	DISC1-IT1	DISC1 intronic transcript 1
chr1	232296156	232296417	262	*	Peak_6961	41	.	Distal Intergenic	1	232399142	232402766	3625	2	57568	ENST00000494056.1	106349	ENSG00000116991	SIPA1L2	signal induced proliferation associated 1 like 2
chr1	232328787	232329038	252	*	Peak_11564	34	.	Distal Intergenic	1	232399142	232402766	3625	2	57568	ENST00000494056.1	73728	ENSG00000116991	SIPA1L2	signal induced proliferation associated 1 like 2
chr1	232329543	232329821	279	*	Peak_1412	60	.	Distal Intergenic	1	232399142	232402766	3625	2	57568	ENST00000494056.1	72945	ENSG00000116991	SIPA1L2	signal induced proliferation associated 1 like 2
chr1	232404949	232405322	374	*	Peak_2446	53	.	Promoter (2-3kb)	1	232399142	232402766	3625	2	57568	ENST00000494056.1	-2183	ENSG00000116991	SIPA1L2	signal induced proliferation associated 1 like 2
chr1	232564312	232564692	381	*	Peak_502	80	.	Promoter (2-3kb)	1	232397965	232561558	163594	2	57568	ENST00000366630.5	-2754	ENSG00000116991	SIPA1L2	signal induced proliferation associated 1 like 2
chr12	3310486	3310834	349	*	Peak_8628	39	.	Intron (ENST00000635814.1/100128253, intron 2 of 6)	12	3296202	3300224	4023	2	100128253	ENST00000505276.2	-10262	NA	LOC100128253	uncharacterized LOC100128253
chr12	3318740	3319098	359	*	Peak_18793	25	.	Exon (ENST00000432994.2/ENST00000432994.2, exon 1 of 2)	12	3298210	3337202	38993	2	100128253	ENST00000635814.1	18104	NA	LOC100128253	uncharacterized LOC100128253
chr1	233201773	233202288	516	*	Peak_1034	66	.	Promoter (1-2kb)	1	232984136	233200191	216056	2	80003	ENST00000462233.5	-1582	ENSG00000135749	PCNX2	pecanex 2
chr12	33317411	33317669	259	*	Peak_7560	40	.	Distal Intergenic	12	33407798	33426160	18363	2	341359	ENST00000567656.1	108491	ENSG00000110975	SYT10	synaptotagmin 10
chr1	233391508	233391824	317	*	Peak_6520	42	.	Distal Intergenic	1	233375783	233385147	9365	1	84451	ENST00000366622.1	15725	ENSG00000143674	MAP3K21	mitogen-activated protein kinase kinase kinase 21
chr1	233400300	233400735	436	*	Peak_16343	28	.	Distal Intergenic	1	233375783	233385147	9365	1	84451	ENST00000366622.1	24517	ENSG00000143674	MAP3K21	mitogen-activated protein kinase kinase kinase 21
chr1	233526482	233526927	446	*	Peak_14300	31	.	Distal Intergenic	1	233614004	233672512	58509	1	3775	ENST00000366621.7	-87077	ENSG00000135750	KCNK1	potassium two pore domain channel subfamily K member 1
chr1	233574949	233575490	542	*	Peak_11565	34	.	Distal Intergenic	1	233614004	233672512	58509	1	3775	ENST00000366621.7	-38514	ENSG00000135750	KCNK1	potassium two pore domain channel subfamily K member 1
chr1	233955120	233955544	425	*	Peak_10535	35	.	Intron (ENST00000366618.7/148641, intron 2 of 7)	1	233904933	234324516	419584	1	148641	ENST00000366618.7	50187	ENSG00000183780	SLC35F3	solute carrier family 35 member F3
chr1	233969774	233970234	461	*	Peak_11093	35	.	Intron (ENST00000366618.7/148641, intron 2 of 7)	1	233904933	234324516	419584	1	148641	ENST00000366618.7	64841	ENSG00000183780	SLC35F3	solute carrier family 35 member F3
chr1	234002528	234002796	269	*	Peak_16344	28	.	Intron (ENST00000366618.7/148641, intron 2 of 7)	1	233904933	234324516	419584	1	148641	ENST00000366618.7	97595	ENSG00000183780	SLC35F3	solute carrier family 35 member F3
chr1	234319793	234320110	318	*	Peak_2328	54	.	Exon (ENST00000366618.7/148641, exon 7 of 8)	1	234306467	234306539	73	1	100616380	ENST00000583284.1	13326	ENSG00000264377	MIR4671	microRNA 4671
chr1	234347386	234347977	592	*	Peak_2245	54	.	Distal Intergenic	1	234373456	234384049	10594	1	388753	ENST00000366615.8	-25479	ENSG00000168275	COA6	cytochrome c oxidase assembly factor 6
chr1	234854769	234855082	314	*	Peak_10110	36	.	Distal Intergenic	1	234757621	234760056	2436	2	100130249	ENST00000624397.1	-94713	ENSG00000279261	PP2672	uncharacterized LOC100130249
chr1	235517659	235518096	438	*	Peak_8346	40	.	Distal Intergenic	1	235449923	235504481	54559	2	148789	ENST00000366600.7	-13178	ENSG00000162885	B3GALNT2	beta-1,3-N-acetylgalactosaminyltransferase 2
chr1	235581907	235582276	370	*	Peak_2936	52	.	Intron (ENST00000391854.6/2786, intron 3 of 3)	1	235551754	235588959	37206	2	2786	ENST00000484517.2	6683	ENSG00000168243	GNG4	G protein subunit gamma 4
chr1	23567499	23567940	442	*	Peak_5372	46	.	Distal Intergenic	1	23557918	23559794	1877	2	3399	ENST00000374561.5	-7705	ENSG00000117318	ID3	inhibitor of DNA binding 3, HLH protein
chr1	23627176	23627673	498	*	Peak_6371	42	.	Promoter (<=1kb)	1	23627334	23640568	13235	1	259283	ENST00000374555.7	0	ENSG00000197880	MDS2	myelodysplastic syndrome 2 translocation associated
chr1	23687999	23688397	399	*	Peak_18299	26	.	Distal Intergenic	1	23691742	23696417	4676	1	6135	ENST00000374550.8	-3345	ENSG00000142676	RPL11	ribosomal protein L11
chr1	23768203	23768523	321	*	Peak_6218	43	.	Intron (ENST00000427796.5/100506963, intron 3 of 3)	1	23771611	23772397	787	2	100506963	ENST00000447961.1	3874	ENSG00000236810	ELOA-AS1	ELOA antisense RNA 1
chr1	23943571	23944039	469	*	Peak_8883	38	.	Distal Intergenic	1	23956839	23963446	6608	1	55629	ENST00000647887.1	-12800	ENSG00000189266	PNRC2	proline rich nuclear receptor coactivator 2
chr12	39839984	39840323	340	*	Peak_11568	34	.	Intron (ENST00000468200.2/283461, intron 18 of 18)	12	39829408	39871881	42474	2	114134	ENST00000465517.1	31558	ENSG00000151229	SLC2A13	solute carrier family 2 member 13
chr12	39903312	39903640	329	*	Peak_4363	46	.	Intron (ENST00000468200.2/283461, intron 18 of 18)	12	39829408	39871881	42474	2	114134	ENST00000465517.1	-31431	ENSG00000151229	SLC2A13	solute carrier family 2 member 13
chr12	4055210	4055461	252	*	Peak_625	75	.	Distal Intergenic	12	3808861	3873448	64588	2	57097	ENST00000447133.7	-181762	ENSG00000111224	PARP11	poly(ADP-ribose) polymerase family member 11
chr1	24082455	24082756	302	*	Peak_17222	28	.	Exon (ENST00000374434.3/127294, exon 17 of 37)	1	24056035	24066579	10545	2	127294	ENST00000338909.9	-15876	ENSG00000142661	MYOM3	myomesin 3
chr1	24120940	24121547	608	*	Peak_766	71	.	Exon (ENST00000270800.1/58985, exon 7 of 7)	1	24056037	24112175	56139	2	127294	ENST00000374434.3	-8765	ENSG00000142661	MYOM3	myomesin 3
chr12	41443797	41444033	237	*	Peak_7564	40	.	Intron (ENST00000402685.6/29951, intron 3 of 9)	12	41437739	41574582	136844	1	29951	ENST00000298919.7	6058	ENSG00000165966	PDZRN4	PDZ domain containing ring finger 4
chr12	42904834	42905129	296	*	Peak_8217	40	.	Distal Intergenic	12	42692216	42717119	24904	1	105369739	ENST00000550177.2	212618	ENSG00000257114	LINC02450	long intergenic non-protein coding RNA 2450
chr1	244003161	244003401	241	*	Peak_4365	46	.	Exon (ENST00000440494.1/339529, exon 3 of 12)	1	244048939	244057472	8534	1	10472	ENST00000622512.1	-45538	ENSG00000179456	ZBTB18	zinc finger and BTB domain containing 18
chr12	44248433	44248749	317	*	Peak_11571	34	.	Exon (ENST00000548007.1/ENST00000548007.1, exon 1 of 1)	12	44318295	44389760	71466	1	84216	ENST00000546978.1	-69546	ENSG00000139173	TMEM117	transmembrane protein 117
chr1	244811677	244812008	332	*	Peak_1413	60	.	Distal Intergenic	1	244835322	244845057	9736	1	116228	ENST00000411948.6	-23314	ENSG00000203667	COX20	cytochrome c oxidase assembly factor COX20
chr1	24547236	24547492	257	*	Peak_6353	42	.	Intron (ENST00000577528.1/100506985, intron 2 of 2)	1	24538802	24556024	17223	2	100506985	ENST00000577528.1	8532	NA	LOC100506985	uncharacterized LOC100506985
chr12	45480600	45480829	230	*	Peak_11574	34	.	Distal Intergenic	12	45335549	45347508	11960	1	196527	ENST00000551667.1	145051	ENSG00000177119	ANO6	anoctamin 6
chr1	24549536	24549862	327	*	Peak_14477	31	.	Intron (ENST00000577528.1/100506985, intron 2 of 2)	1	24538802	24556024	17223	2	100506985	ENST00000577528.1	6162	NA	LOC100506985	uncharacterized LOC100506985
chr12	45540006	45540326	321	*	Peak_19521	24	.	Intron (ENST00000551229.2/ENST00000551229.2, intron 2 of 4)	12	45718046	45727775	9730	2	400027	ENST00000609803.2	187449	NA	LINC00938	long intergenic non-protein coding RNA 938
chr1	24633671	24634286	616	*	Peak_2082	56	.	Promoter (<=1kb)	1	24633066	24650032	16967	1	10250	ENST00000478890.5	605	ENSG00000133226	SRRM1	serine and arginine repetitive matrix 1
chr12	46732855	46733147	293	*	Peak_5865	44	.	Intron (ENST00000611243.1/100288798, intron 1 of 1)	12	46766303	46769304	3002	2	55089	ENST00000550670.1	36157	ENSG00000139209	SLC38A4	solute carrier family 38 member 4
chr12	46865207	46865606	400	*	Peak_1295	61	.	Intron (ENST00000611243.1/100288798, intron 1 of 1)	12	46779949	46832408	52460	2	55089	ENST00000546940.1	-32799	ENSG00000139209	SLC38A4	solute carrier family 38 member 4
chr12	47486186	47486665	480	*	Peak_8218	40	.	Distal Intergenic	12	47414651	47420179	5529	1	111082992	ENST00000552320.2	71535	NA	LINC02156	long intergenic non-protein coding RNA 2156
chr1	247785541	247785772	232	*	Peak_2449	53	.	Distal Intergenic	1	247757374	247758680	1307	2	26188	ENST00000408896.4	-26861	ENSG00000221888	OR1C1	olfactory receptor family 1 subfamily C member 1
chr12	47932490	47932791	302	*	Peak_8316	40	.	Intron (ENST00000395324.6/7421, intron 1 of 9)	12	47841537	47943048	101512	2	7421	ENST00000395324.6	10257	ENSG00000111424	VDR	vitamin D receptor
chr12	48279088	48279419	332	*	Peak_16352	28	.	Intron (ENST00000547523.1/ENST00000547523.1, intron 1 of 3)	12	48328980	48330279	1300	1	341567	ENST00000335017.1	-49561	ENSG00000187166	H1FNT	H1 histone family member N, testis specific
chr12	48489918	48490182	265	*	Peak_11577	34	.	Promoter (<=1kb)	12	48490812	48496386	5575	1	121273	ENST00000549398.5	-630	ENSG00000177627	C12orf54	chromosome 12 open reading frame 54
chr12	48599966	48600304	339	*	Peak_7570	40	.	Distal Intergenic	12	48567688	48570066	2379	2	3906	ENST00000549817.1	-29900	ENSG00000167531	LALBA	lactalbumin alpha
chr12	48738854	48739183	330	*	Peak_6059	43	.	Intron (ENST00000548380.5/255411, intron 1 of 3)	12	48727457	48765785	38329	1	255411	ENST00000548054.2	11397	ENSG00000257987	TEX49	testis expressed 49
chr12	48980029	48980546	518	*	Peak_2857	52	.	Promoter (1-2kb)	12	48978615	48981676	3062	1	7471	ENST00000293549.3	1414	ENSG00000125084	WNT1	Wnt family member 1
chr12	49821117	49822239	1123	*	Peak_87	146	.	Intron (ENST00000335999.6/57701, intron 1 of 12)	12	49791146	49828425	37280	2	57701	ENST00000335999.6	6186	ENSG00000167566	NCKAP5L	NCK associated protein 5 like
chr1	25055887	25056268	382	*	Peak_535	78	.	Intron (ENST00000424084.1/ENST00000424084.1, intron 2 of 2)	1	25023503	25023586	84	1	100616365	ENST00000580572.1	32384	ENSG00000264371	MIR4425	microRNA 4425
chr12	50623582	50624058	477	*	Peak_5520	45	.	Intron (ENST00000549620.5/57609, intron 1 of 7)	12	50640805	50680282	39478	1	57609	ENST00000546719.1	-16747	ENSG00000066084	DIP2B	disco interacting protein 2 homolog B
chr1	25089806	25090083	278	*	Peak_1651	60	.	Intron (ENST00000424084.1/ENST00000424084.1, intron 2 of 2)	1	25023503	25023586	84	1	100616365	ENST00000580572.1	66303	ENSG00000264371	MIR4425	microRNA 4425
chr12	51034141	51034439	299	*	Peak_5501	45	.	Distal Intergenic	12	50985992	51028566	42575	2	4891	ENST00000394904.8	-5575	ENSG00000110911	SLC11A2	solute carrier family 11 member 2
chr12	51225686	51226025	340	*	Peak_18497	26	.	Distal Intergenic	12	51189431	51217708	28278	2	5463	ENST00000550824.6	-7978	ENSG00000184271	POU6F1	POU class 6 homeobox 1
chr1	25152479	25152897	419	*	Peak_10540	35	.	Distal Intergenic	1	25229015	25232432	3418	2	25949	ENST00000474160.1	79535	ENSG00000117614	SYF2	SYF2 pre-mRNA splicing factor
chr12	52117531	52117799	269	*	Peak_12820	34	.	Distal Intergenic	12	52093569	52108250	14682	1	26628	ENST00000546981.1	23962	ENSG00000257542	OR7E47P	olfactory receptor family 7 subfamily E member 47 pseudogene
chr12	5215699	5216030	332	*	Peak_13684	32	.	Distal Intergenic	12	5234674	5238272	3599	2	101929584	ENST00000540237.1	22242	ENSG00000256115	LINC02443	long intergenic non-protein coding RNA 2443
chr12	52378014	52378318	305	*	Peak_7322	40	.	3' UTR	12	52377812	52385652	7841	2	3890	ENST00000257951.3	7334	ENSG00000161849	KRT84	keratin 84
chr12	52480106	52480524	419	*	Peak_10541	35	.	Distal Intergenic	12	52468516	52473785	5270	2	286887	ENST00000252250.6	-6321	ENSG00000170465	KRT6C	keratin 6C
chr12	52494602	52494941	340	*	Peak_4366	46	.	Promoter (1-2kb)	12	52487174	52493257	6084	2	3853	ENST00000330722.6	-1345	ENSG00000205420	KRT6A	keratin 6A
chr12	52561384	52561772	389	*	Peak_19681	24	.	Distal Intergenic	12	52566999	52568510	1512	2	121391	ENST00000546384.1	6738	ENSG00000170484	KRT74	keratin 74
chr12	52697205	52697497	293	*	Peak_577	76	.	Promoter (1-2kb)	12	52692828	52695352	2525	2	374454	ENST00000550823.1	-1853	ENSG00000189182	KRT77	keratin 77
chr12	52706954	52707522	569	*	Peak_7112	41	.	Distal Intergenic	12	52690804	52703463	12660	2	374454	ENST00000553168.1	-3491	ENSG00000189182	KRT77	keratin 77
chr12	52788610	52788942	333	*	Peak_8884	38	.	Downstream (<1kb)	12	52789685	52796117	6433	2	3850	ENST00000417996.2	7175	ENSG00000186442	KRT3	keratin 3
chr12	53304131	53304660	530	*	Peak_3486	48	.	Promoter (<=1kb)	12	53303168	53307171	4004	1	60314	ENST00000547864.1	963	ENSG00000139637	C12orf10	chromosome 12 open reading frame 10
chr12	53664904	53665173	270	*	Peak_3881	47	.	3' UTR	12	53632726	53669212	36487	2	517	ENST00000550241.1	4039	ENSG00000135390	ATP5MC2	ATP synthase membrane subunit c locus 2
chr12	53739323	53739668	346	*	Peak_3533	48	.	Distal Intergenic	12	53708517	53727745	19229	2	57658	ENST00000262059.8	-11578	ENSG00000012822	CALCOCO1	calcium binding and coiled-coil domain 1
chr12	53829401	53829880	480	*	Peak_2033	57	.	Distal Intergenic	12	53750839	53757034	6196	2	102216268	ENST00000626733.1	-72367	ENSG00000260492	CISTR	chondrogenesis-associated transcript
chr12	53944375	53944672	298	*	Peak_3452	49	.	Intron (ENST00000243056.4/3229, intron 1 of 1)	12	53935328	53939643	4316	2	100874366	ENST00000512916.2	-4732	ENSG00000249641	HOXC13-AS	HOXC13 antisense RNA
chr1	25437753	25438049	297	*	Peak_4176	46	.	Intron (ENST00000399766.7/55219, intron 1 of 8)	1	25430960	25499230	68271	1	55219	ENST00000647928.1	6793	ENSG00000204178	MACO1	macoilin 1
chr12	54479	55245	767	*	Peak_8464	39	.	Distal Intergenic	12	66765	178460	111696	1	440073	ENST00000538872.5	-11520	ENSG00000120645	IQSEC3	IQ motif and Sec7 domain 3
chr12	54719368	54719754	387	*	Peak_4367	46	.	Distal Intergenic	12	54644630	54648493	3864	2	117159	ENST00000546807.5	-70875	ENSG00000161634	DCD	dermcidin
chr1	25513747	25514086	340	*	Peak_626	75	.	Distal Intergenic	1	25543580	25568886	25307	1	26119	ENST00000374338.4	-29494	ENSG00000157978	LDLRAP1	low density lipoprotein receptor adaptor protein 1
chr12	553611	554116	506	*	Peak_9480	37	.	Promoter (1-2kb)	12	552075	563498	11424	1	283358	ENST00000535402.1	1536	ENSG00000139044	B4GALNT3	beta-1,4-N-acetyl-galactosaminyltransferase 3
chr12	55418159	55418437	279	*	Peak_1414	60	.	Distal Intergenic	12	55426254	55427192	939	1	390326	ENST00000328314.3	-7817	ENSG00000185821	OR6C76	olfactory receptor family 6 subfamily C member 76
chr12	56001802	56002031	230	*	Peak_9915	36	.	Promoter (<=1kb)	12	56001739	56003734	1996	1	6821	ENST00000546712.1	63	ENSG00000139531	SUOX	sulfite oxidase
chr12	56305147	56305438	292	*	Peak_8586	39	.	Intron (ENST00000549565.1/ENST00000549565.1, intron 1 of 2)	12	56271701	56300392	28692	2	1431	ENST00000351328.7	-4755	ENSG00000062485	CS	citrate synthase
chr12	56911300	56911540	241	*	Peak_9638	36	.	Distal Intergenic	12	56923154	56934405	11252	2	121214	ENST00000293502.1	22865	ENSG00000170426	SDR9C7	short chain dehydrogenase/reductase family 9C member 7
chr12	56973394	56973868	475	*	Peak_7571	40	.	Distal Intergenic	12	56951438	56959374	7937	2	8608	ENST00000360752.4	-14020	ENSG00000139547	RDH16	retinol dehydrogenase 16
chr12	56983096	56983576	481	*	Peak_9777	36	.	Exon (ENST00000611536.1/ENST00000611536.1, exon 2 of 4)	12	56994446	56998441	3996	1	11318	ENST00000300098.2	-10870	ENSG00000166856	GPR182	G protein-coupled receptor 182
chr12	57203734	57204187	454	*	Peak_8656	39	.	Promoter (<=1kb)	12	57203618	57213340	9723	1	4035	ENST00000556356.1	116	ENSG00000123384	LRP1	LDL receptor related protein 1
chr1	25728946	25729350	405	*	Peak_9411	37	.	Intron (ENST00000611903.4/57134, intron 2 of 13)	1	25709602	25784450	74849	1	57134	ENST00000374329.1	19344	ENSG00000117643	MAN1C1	mannosidase alpha class 1C member 1
chr1	25763728	25764309	582	*	Peak_8844	38	.	Exon (ENST00000611903.4/57134, exon 8 of 14)	1	25772069	25782700	10632	1	57134	ENST00000496532.5	-7760	ENSG00000117643	MAN1C1	mannosidase alpha class 1C member 1
chr1	25771176	25771859	684	*	Peak_777	71	.	Promoter (<=1kb)	1	25772069	25782700	10632	1	57134	ENST00000496532.5	-210	ENSG00000117643	MAN1C1	mannosidase alpha class 1C member 1
chr12	58036097	58036367	271	*	Peak_14165	32	.	Distal Intergenic	12	58087892	58093362	5471	1	105369785	ENST00000548215.1	-51525	ENSG00000257541	LINC02403	long intergenic non-protein coding RNA 2403
chr1	26044620	26045099	480	*	Peak_6012	44	.	Promoter (<=1kb)	1	26043439	26045451	2013	2	7780	ENST00000498060.1	352	ENSG00000158014	SLC30A2	solute carrier family 30 member 2
chr12	60957309	60957794	486	*	Peak_4376	46	.	Distal Intergenic	12	61708277	61827233	118957	2	338811	ENST00000550003.1	869439	ENSG00000198673	TAFA2	TAFA chemokine like family member 2
chr12	6124692	6125083	392	*	Peak_7282	40	.	Promoter (<=1kb)	12	5993880	6124770	130891	2	7450	ENST00000538635.5	0	ENSG00000110799	VWF	von Willebrand factor
chr1	26160463	26161114	652	*	Peak_7313	40	.	Promoter (1-2kb)	1	26159020	26163962	4943	1	79927	ENST00000374268.4	1443	ENSG00000197245	FAM110D	family with sequence similarity 110 member D
chr1	26209983	26210679	697	*	Peak_8792	38	.	Promoter (<=1kb)	1	26209741	26227840	18100	1	101928303	ENST00000428812.1	242	ENSG00000236155	LOC101928303	uncharacterized LOC101928303
chr12	62237856	62238132	277	*	Peak_16353	28	.	Intron (ENST00000551619.5/338811, intron 1 of 5)	12	61708274	62258823	550550	2	338811	ENST00000551619.5	20691	ENSG00000198673	TAFA2	TAFA chemokine like family member 2
chr12	63064523	63064777	255	*	Peak_4377	46	.	Distal Intergenic	12	63145234	63150179	4946	2	552	ENST00000550940.1	85402	ENSG00000166148	AVPR1A	arginine vasopressin receptor 1A
chr1	26394265	26394613	349	*	Peak_9343	37	.	Distal Intergenic	1	26410778	26429722	18945	1	79727	ENST00000326279.10	-16165	ENSG00000131914	LIN28A	lin-28 homolog A
chr12	64252183	64252724	542	*	Peak_8629	39	.	Intron (ENST00000535684.5/ENST00000535684.5, intron 2 of 4)	12	64266983	64270573	3591	2	115749	ENST00000535515.5	17849	ENSG00000185306	C12orf56	chromosome 12 open reading frame 56
chr12	64353781	64354034	254	*	Peak_7572	40	.	Intron (ENST00000535684.5/ENST00000535684.5, intron 2 of 4)	12	64303750	64390526	86777	2	115749	ENST00000543259.1	36492	ENSG00000185306	C12orf56	chromosome 12 open reading frame 56
chr1	26459133	26459609	477	*	Peak_13566	32	.	Intron (ENST00000434391.6/79947, intron 7 of 8)	1	26462756	26467282	4527	2	101928324	ENST00000423060.1	7673	NA	LOC101928324	uncharacterized LOC101928324
chr12	65265459	65266364	906	*	Peak_4007	47	.	Distal Intergenic	12	65278643	65466907	188265	1	253827	ENST00000308259.9	-12279	ENSG00000174099	MSRB3	methionine sulfoxide reductase B3
chr1	2654626	2654982	357	*	Peak_17908	26	.	Intron (ENST00000401095.8/100287898, intron 6 of 8)	1	2590643	2632990	42348	2	79258	ENST00000378412.7	-21636	ENSG00000142606	MMEL1	membrane metalloendopeptidase like 1
chr1	26608988	26609262	275	*	Peak_9916	36	.	Distal Intergenic	1	26572270	26574734	2465	1	6195	ENST00000438977.1	36718	ENSG00000117676	RPS6KA1	ribosomal protein S6 kinase A1
chr12	67561479	67561763	285	*	Peak_4008	47	.	Intron (ENST00000650195.1/100507175, intron 4 of 4)	12	67520082	67567126	47045	1	100507175	ENST00000400306.2	41397	ENSG00000203585	LINC02408	long intergenic non-protein coding RNA 2408
chr12	6810364	6810781	418	*	Peak_3656	47	.	Promoter (2-3kb)	12	6813552	6816204	2653	1	920	ENST00000536563.1	-2771	ENSG00000010610	CD4	CD4 molecule
chr12	6816812	6817941	1130	*	Peak_318	92	.	Promoter (2-3kb)	12	6814054	6814842	789	1	920	ENST00000543755.1	2758	ENSG00000010610	CD4	CD4 molecule
chr12	68194381	68194993	613	*	Peak_11587	34	.	Intron (ENST00000536914.1/100885789, intron 5 of 5)	12	68201351	68225821	24471	2	55801	ENST00000229134.4	30828	ENSG00000111536	IL26	interleukin 26
chr12	68589725	68590140	416	*	Peak_14393	31	.	Distal Intergenic	12	68610839	68671901	61063	1	5908	ENST00000250559.13	-20699	ENSG00000127314	RAP1B	RAP1B, member of RAS oncogene family
chr12	68891903	68892363	461	*	Peak_4380	46	.	Intron (ENST00000551568.5/1368, intron 2 of 8)	12	68866825	68870382	3558	2	1368	ENST00000546912.1	-21521	ENSG00000135678	CPM	carboxypeptidase M
chr12	68893513	68893820	308	*	Peak_9917	36	.	Intron (ENST00000551568.5/1368, intron 2 of 8)	12	68866825	68870382	3558	2	1368	ENST00000546912.1	-23131	ENSG00000135678	CPM	carboxypeptidase M
chr12	69100201	69100468	268	*	Peak_5632	45	.	Distal Intergenic	12	68957590	68971570	13981	2	1368	ENST00000549691.1	-128631	ENSG00000135678	CPM	carboxypeptidase M
chr12	70372312	70372541	230	*	Peak_13685	32	.	Intron (ENST00000258111.4/27345, intron 1 of 2)	12	70366276	70434292	68017	1	27345	ENST00000258111.4	6036	ENSG00000135643	KCNMB4	potassium calcium-activated channel subfamily M regulatory beta subunit 4
chr1	27173730	27174226	497	*	Peak_2350	54	.	Distal Intergenic	1	27114233	27166981	52749	2	6548	ENST00000374084.2	-6749	ENSG00000090020	SLC9A1	solute carrier family 9 member A1
chr12	7471912	7472460	549	*	Peak_7573	40	.	Promoter (<=1kb)	12	7471171	7471936	766	2	9332	ENST00000534848.1	0	ENSG00000177575	CD163	CD163 molecule
chr12	75013907	75014136	230	*	Peak_6605	42	.	Distal Intergenic	12	75048229	75050927	2699	2	3747	ENST00000548243.1	36791	ENSG00000166006	KCNC2	potassium voltage-gated channel subfamily C member 2
chr12	76114927	76115235	309	*	Peak_15087	30	.	Distal Intergenic	12	76036587	76085033	48447	2	4673	ENST00000618691.4	-29894	ENSG00000187109	NAP1L1	nucleosome assembly protein 1 like 1
chr12	78089362	78089957	596	*	Peak_11590	34	.	Intron (ENST00000536525.6/89795, intron 12 of 38)	12	78118044	78213008	94965	1	89795	ENST00000552895.5	-28087	ENSG00000067798	NAV3	neuron navigator 3
chr12	79246237	79246466	230	*	Peak_11591	34	.	Intron (ENST00000393240.7/6857, intron 5 of 11)	12	79291799	79353542	61744	1	6857	ENST00000549559.2	-45333	ENSG00000067715	SYT1	synaptotagmin 1
chr1	27926989	27927496	508	*	Peak_13099	34	.	Distal Intergenic	1	27934993	27959157	24165	1	27293	ENST00000373894.7	-7497	ENSG00000130768	SMPDL3B	sphingomyelin phosphodiesterase acid like 3B
chr1	27941872	27942427	556	*	Peak_575	76	.	Exon (ENST00000411604.5/27293, exon 2 of 7)	1	27935110	27959151	24042	1	27293	ENST00000549094.1	6762	ENSG00000130768	SMPDL3B	sphingomyelin phosphodiesterase acid like 3B
chr1	27986528	27986772	245	*	Peak_1231	62	.	Intron (ENST00000373871.7/2140, intron 16 of 17)	1	27963637	27966710	3074	1	55113	ENST00000481387.1	22891	ENSG00000158156	XKR8	XK related 8
chr12	80136087	80136466	380	*	Peak_11592	34	.	Intron (ENST00000643417.1/283310, intron 3 of 22)	12	80099537	80380879	281343	1	283310	ENST00000547103.6	36550	ENSG00000165899	OTOGL	otogelin like
chr12	8044174	8044501	328	*	Peak_6372	42	.	Intron (ENST00000162391.7/55810, intron 5 of 10)	12	8049968	8053013	3046	1	55810	ENST00000539192.1	-5467	ENSG00000065970	FOXJ2	forkhead box J2
chr12	8047981	8048230	250	*	Peak_3146	51	.	Promoter (1-2kb)	12	8049968	8053013	3046	1	55810	ENST00000539192.1	-1738	ENSG00000065970	FOXJ2	forkhead box J2
chr12	80705541	80705931	391	*	Peak_16360	28	.	Promoter (1-2kb)	12	80707498	80709474	1977	1	4618	ENST00000228641.3	-1567	ENSG00000111046	MYF6	myogenic factor 6
chr1	2813387	2813732	346	*	Peak_3502	48	.	Distal Intergenic	1	2635976	2801717	165742	2	100287898	ENST00000401095.8	-11670	ENSG00000215912	TTC34	tetratricopeptide repeat domain 34
chr12	8218989	8219321	333	*	Peak_16361	28	.	Exon (ENST00000618256.1/ENST00000618256.1, exon 1 of 1)	12	8224791	8227587	2797	2	55138	ENST00000442295.2	8266	ENSG00000171847	FAM90A1	family with sequence similarity 90 member A1
chr12	84294279	84294508	230	*	Peak_18808	25	.	Exon (ENST00000642846.1/ENST00000642846.1, exon 8 of 8)	12	84861603	84867833	6231	2	55117	ENST00000548267.1	573325	ENSG00000072041	SLC6A15	solute carrier family 6 member 15
chr12	85869168	85869460	293	*	Peak_2452	53	.	Distal Intergenic	12	85874295	85882779	8485	1	4922	ENST00000551529.5	-4835	ENSG00000133636	NTS	neurotensin
chr12	85884382	85884652	271	*	Peak_11595	34	.	Distal Intergenic	12	85878029	85882799	4771	1	4922	ENST00000550879.1	6353	ENSG00000133636	NTS	neurotensin
chr12	8786590	8787298	709	*	Peak_7576	40	.	Intron (ENST00000537288.1/ENST00000537288.1, intron 1 of 1)	12	8779812	8783095	3284	1	57494	ENST00000510357.2	6778	ENSG00000166532	RIMKLB	ribosomal modification protein rimK like family member B
chr1	28830438	28830712	275	*	Peak_1248	62	.	Intron (ENST00000621425.1/4985, intron 1 of 3)	1	28812142	28871267	59126	1	4985	ENST00000234961.6	18296	ENSG00000116329	OPRD1	opioid receptor delta 1
chr1	28833919	28834377	459	*	Peak_13100	34	.	Intron (ENST00000621425.1/4985, intron 1 of 3)	1	28812142	28871267	59126	1	4985	ENST00000234961.6	21777	ENSG00000116329	OPRD1	opioid receptor delta 1
chr1	28863393	28863662	270	*	Peak_3026	51	.	3' UTR	1	28887091	29120020	232930	1	2035	ENST00000642260.1	-23429	ENSG00000159023	EPB41	erythrocyte membrane protein band 4.1
chr12	8897164	8897393	230	*	Peak_11598	34	.	Intron (ENST00000631830.1/ENST00000631830.1, intron 1 of 1)	12	8913896	8922691	8796	1	1911	ENST00000538657.5	-16503	ENSG00000111752	PHC1	polyhomeotic homolog 1
chr12	8898086	8898398	313	*	Peak_7578	40	.	Intron (ENST00000631830.1/ENST00000631830.1, intron 1 of 1)	12	8913896	8922691	8796	1	1911	ENST00000538657.5	-15498	ENSG00000111752	PHC1	polyhomeotic homolog 1
chr1	29008339	29008568	230	*	Peak_11600	34	.	Intron (ENST00000642260.1/2035, intron 5 of 20)	1	29015692	29072806	57115	1	2035	ENST00000636666.1	-7124	ENSG00000159023	EPB41	erythrocyte membrane protein band 4.1
chr12	90356763	90357174	412	*	Peak_7579	40	.	Distal Intergenic	12	90293323	90296247	2925	1	105369893	ENST00000548172.1	63440	NA	LINC02392	long intergenic non-protein coding RNA 2392
chr12	9127619	9128012	394	*	Peak_11601	34	.	Exon (ENST00000540749.1/ENST00000540749.1, exon 1 of 1)	12	9110314	9116229	5916	2	2	ENST00000404455.2	-11390	ENSG00000175899	A2M	alpha-2-macroglobulin
chr12	91818356	91818938	583	*	Peak_11603	34	.	Distal Intergenic	12	91988323	91993529	5207	2	256021	ENST00000551764.5	174591	ENSG00000257242	LINC01619	long intergenic non-protein coding RNA 1619
chr12	92339073	92339409	337	*	Peak_10547	35	.	Intron (ENST00000615716.1/ENST00000615716.1, intron 2 of 4)	12	92421531	92483680	62150	1	100507616	ENST00000508671.1	-82122	NA	LINC02397	long intergenic non-protein coding RNA 2397
chr12	92555861	92556188	328	*	Peak_11606	34	.	Distal Intergenic	12	92466451	92492091	25641	1	100507616	ENST00000504409.3	89410	NA	LINC02397	long intergenic non-protein coding RNA 2397
chr1	29304742	29305037	296	*	Peak_5261	46	.	Exon (ENST00000345512.7/10076, exon 18 of 31)	1	29311346	29312659	1314	1	10076	ENST00000526080.1	-6309	ENSG00000060656	PTPRU	protein tyrosine phosphatase receptor type U
chr12	93247739	93248094	356	*	Peak_5458	45	.	Distal Intergenic	12	93003758	93215679	211922	2	643339	ENST00000549930.1	-32060	NA	LOC643339	uncharacterized LOC643339
chr1	29326093	29326393	301	*	Peak_9165	38	.	Promoter (2-3kb)	1	29323218	29325650	2433	1	10076	ENST00000492954.1	2875	ENSG00000060656	PTPRU	protein tyrosine phosphatase receptor type U
chr1	29334586	29334907	322	*	Peak_6735	41	.	Intron (ENST00000417651.1/101928460, intron 1 of 2)	1	29323218	29325650	2433	1	10076	ENST00000492954.1	11368	ENSG00000060656	PTPRU	protein tyrosine phosphatase receptor type U
chr12	93390721	93391433	713	*	Peak_5977	44	.	Intron (ENST00000337179.9/11163, intron 1 of 4)	12	93378654	93399329	20676	1	11163	ENST00000546925.1	12067	ENSG00000173598	NUDT4	nudix hydrolase 4
chr12	94059207	94059483	277	*	Peak_6653	42	.	Distal Intergenic	12	94148723	94307675	158953	1	10154	ENST00000258526.8	-89240	ENSG00000136040	PLXNC1	plexin C1
chr12	94534396	94534773	378	*	Peak_2247	54	.	Distal Intergenic	12	94561789	94561859	71	1	100847031	ENST00000582250.1	-27016	ENSG00000266099	MIR5700	microRNA 5700
chr12	94649935	94650494	560	*	Peak_1416	60	.	Promoter (<=1kb)	12	94567124	94650562	83439	2	57458	ENST00000261226.8	68	ENSG00000057704	TMCC3	transmembrane and coiled-coil domain family 3
chr1	29504686	29504915	230	*	Peak_8691	39	.	Distal Intergenic	1	29329620	29350114	20495	2	101928460	ENST00000417651.1	-154572	ENSG00000230523	LINC01756	long intergenic non-protein coding RNA 1756
chr12	95333623	95333928	306	*	Peak_1798	58	.	Intron (ENST00000636165.1/ENST00000636165.1, intron 7 of 7)	12	95309923	95309984	62	1	100500802	ENST00000579373.1	23700	ENSG00000265917	MIR3685	microRNA 3685
chr12	95400584	95400838	255	*	Peak_4390	46	.	Intron (ENST00000636165.1/ENST00000636165.1, intron 3 of 7)	12	95473520	95514342	40823	1	10988	ENST00000535095.5	-72682	ENSG00000111142	METAP2	methionyl aminopeptidase 2
chr1	29542535	29543126	592	*	Peak_9778	36	.	Distal Intergenic	1	29329620	29350114	20495	2	101928460	ENST00000417651.1	-192421	ENSG00000230523	LINC01756	long intergenic non-protein coding RNA 1756
chr12	95536690	95536957	268	*	Peak_628	75	.	Promoter (2-3kb)	12	95518143	95534326	16184	2	84101	ENST00000552440.5	-2364	ENSG00000136014	USP44	ubiquitin specific peptidase 44
chr12	96201873	96202292	420	*	Peak_14946	30	.	Intron (ENST00000228741.7/2004, intron 1 of 4)	12	96194614	96247211	52598	1	2004	ENST00000547860.1	7259	ENSG00000111145	ELK3	ETS transcription factor ELK3
chr12	9878494	9878764	271	*	Peak_11611	34	.	Promoter (2-3kb)	12	9881489	9895833	14345	1	100431172	ENST00000535540.1	-2725	ENSG00000256797	KLRF2	killer cell lectin like receptor F2
chr1	29884740	29885156	417	*	Peak_4393	46	.	Distal Intergenic	1	30013952	30037612	23661	2	101929406	ENST00000445180.2	152456	ENSG00000233399	LINC01648	long intergenic non-protein coding RNA 1648
chr12	99172087	99172382	296	*	Peak_7582	40	.	Intron (ENST00000547776.6/56899, intron 14 of 25)	12	98745351	99155090	409740	2	56899	ENST00000547446.5	-16997	ENSG00000185046	ANKS1B	ankyrin repeat and sterile alpha motif domain containing 1B
chr12	99690530	99690944	415	*	Peak_1418	60	.	Intron (ENST00000547776.6/56899, intron 8 of 25)	12	99504598	99706624	202027	2	56899	ENST00000552232.1	15680	ENSG00000185046	ANKS1B	ankyrin repeat and sterile alpha motif domain containing 1B
chr1	30622102	30622601	500	*	Peak_4396	46	.	Distal Intergenic	1	30713767	30716135	2369	2	4146	ENST00000494561.1	93534	ENSG00000162510	MATN1	matrilin 1
chr1	3067344	3067723	380	*	Peak_2248	54	.	Promoter (<=1kb)	1	3064072	3067769	3698	2	440556	ENST00000321336.1	46	ENSG00000177133	PRDM16-DT	PRDM16 divergent transcript
chr1	30687060	30687307	248	*	Peak_2893	52	.	Distal Intergenic	1	30713767	30716135	2369	2	4146	ENST00000494561.1	28828	ENSG00000162510	MATN1	matrilin 1
chr1	3072652	3073040	389	*	Peak_3291	50	.	Intron (ENST00000511072.5/63976, intron 1 of 15)	1	3069211	3438621	369411	1	63976	ENST00000270722.9	3441	ENSG00000142611	PRDM16	PR/SET domain 16
chr1	30902662	30902899	238	*	Peak_10366	35	.	Intron (ENST00000339394.6/9672, intron 1 of 4)	1	30873135	30908761	35627	2	9672	ENST00000339394.6	5862	ENSG00000162512	SDC3	syndecan 3
chr13	109512582	109512882	301	*	Peak_11614	34	.	Intron (ENST00000650264.1/ENST00000650264.1, intron 3 of 3)	13	109400696	109401641	946	1	104326054	ENST00000439008.1	111886	ENSG00000229792	LINC00399	long intergenic non-protein coding RNA 399
chr13	110163023	110163349	327	*	Peak_11616	34	.	Promoter (<=1kb)	13	110161018	110163490	2473	2	1282	ENST00000467182.1	141	ENSG00000187498	COL4A1	collagen type IV alpha 1 chain
chr13	110384906	110385353	448	*	Peak_2122	55	.	Intron (ENST00000400163.7/1284, intron 4 of 4)	13	110424802	110429842	5041	1	1284	ENST00000619688.2	-39449	ENSG00000134871	COL4A2	collagen type IV alpha 2 chain
chr13	113807937	113808346	410	*	Peak_1419	60	.	Intron (ENST00000375353.4/348013, intron 8 of 8)	13	113803050	113811953	8904	1	348013	ENST00000467169.1	4887	ENSG00000184497	TMEM255B	transmembrane protein 255B
chr13	114220374	114220747	374	*	Peak_11619	34	.	Intron (ENST00000635974.1/ENST00000635974.1, intron 3 of 3)	13	114234887	114272675	37789	1	8881	ENST00000360383.7	-14140	ENSG00000130177	CDC16	cell division cycle 16
chr1	31215917	31216236	320	*	Peak_785	71	.	Intron (ENST00000373736.6/79570, intron 1 of 6)	1	31182551	31193920	11370	2	79570	ENST00000530145.1	-21997	ENSG00000084628	NKAIN1	sodium/potassium transporting ATPase interacting 1
chr1	31435334	31435607	274	*	Peak_17097	28	.	Distal Intergenic	1	31413813	31434680	20868	1	347735	ENST00000536384.2	21521	ENSG00000168528	SERINC2	serine incorporator 2
chr1	31528150	31528413	264	*	Peak_3028	51	.	Intron (ENST00000639839.1/149086, intron 2 of 4)	1	31518356	31526444	8089	1	284551	ENST00000640623.1	9794	NA	LINC01226	long intergenic non-protein coding RNA 1226
chr1	3169350	3169721	372	*	Peak_10551	35	.	Intron (ENST00000511072.5/63976, intron 1 of 15)	1	3127975	3128035	61	1	100422968	ENST00000635819.1	41375	ENSG00000283572	MIR4251	microRNA 4251
chr1	31903754	31904037	284	*	Peak_3713	47	.	Intron (ENST00000602889.1/ENST00000602889.1, intron 1 of 1)	1	31908653	31911280	2628	2	8073	ENST00000489313.1	7243	ENSG00000184007	PTP4A2	protein tyrosine phosphatase 4A2
chr13	20301415	20301840	426	*	Peak_16366	28	.	Distal Intergenic	13	20221969	20232395	10427	2	10804	ENST00000356192.7	-69020	ENSG00000121742	GJB6	gap junction protein beta 6
chr13	20709883	20710228	346	*	Peak_14865	31	.	Intron (ENST00000304920.3/53342, intron 2 of 2)	13	20704079	20721685	17607	1	53342	ENST00000468605.1	5804	ENSG00000172458	IL17D	interleukin 17D
chr13	21832224	21832720	497	*	Peak_4400	46	.	Distal Intergenic	13	21872770	21875566	2797	2	100874182	ENST00000413124.2	42846	ENSG00000226722	LINC00424	long intergenic non-protein coding RNA 424
chr1	3232832	3233666	835	*	Peak_8693	39	.	Intron (ENST00000511072.5/63976, intron 2 of 15)	1	3237931	3433925	195995	1	63976	ENST00000512462.5	-4265	ENSG00000142611	PRDM16	PR/SET domain 16
chr1	3236181	3236542	362	*	Peak_3015	51	.	Promoter (1-2kb)	1	3237931	3433925	195995	1	63976	ENST00000512462.5	-1389	ENSG00000142611	PRDM16	PR/SET domain 16
chr13	23804640	23804946	307	*	Peak_7586	40	.	Intron (ENST00000382172.3/4285, intron 16 of 18)	13	23730189	23760573	30385	2	4285	ENST00000433710.2	-44067	ENSG00000027001	MIPEP	mitochondrial intermediate peptidase
chr13	24073301	24073612	312	*	Peak_8946	38	.	Intron (ENST00000382141.4/221178, intron 3 of 15)	13	24160716	24307074	146359	1	221178	ENST00000382108.7	-87104	ENSG00000182957	SPATA13	spermatogenesis associated 13
chr13	24677763	24678109	347	*	Peak_10554	35	.	Promoter (2-3kb)	13	24680411	24711783	31373	1	479	ENST00000218548.10	-2302	ENSG00000075673	ATP12A	ATPase H+/K+ transporting non-gastric alpha2 subunit
chr13	24723571	24724104	534	*	Peak_7114	41	.	Intron (ENST00000649394.1/ENST00000649394.1, intron 2 of 2)	13	24764152	24879921	115770	1	56163	ENST00000255324.9	-40048	ENSG00000132972	RNF17	ring finger protein 17
chr13	25372304	25372848	545	*	Peak_2455	53	.	Promoter (<=1kb)	13	25372071	26025851	653781	1	51761	ENST00000381655.6	233	ENSG00000132932	ATP8A2	ATPase phospholipid transporting 8A2
chr13	25496561	25496820	260	*	Peak_16368	28	.	Intron (ENST00000381655.6/51761, intron 2 of 36)	13	25469021	26020287	551267	1	51761	ENST00000255283.9	27540	ENSG00000132932	ATP8A2	ATPase phospholipid transporting 8A2
chr1	3255693	3255933	241	*	Peak_17605	27	.	Intron (ENST00000511072.5/63976, intron 3 of 15)	1	3244132	3386918	142787	1	63976	ENST00000463591.1	11561	ENSG00000142611	PRDM16	PR/SET domain 16
chr13	26529006	26529290	285	*	Peak_5978	44	.	Distal Intergenic	13	26557703	26688943	131241	1	10810	ENST00000361042.8	-28413	ENSG00000132970	WASF3	WASP family member 3
chr1	32660145	32660456	312	*	Peak_6999	41	.	Intron (ENST00000414241.7/5928, intron 3 of 11)	1	32668319	32672901	4583	1	5928	ENST00000475321.5	-7863	ENSG00000162521	RBBP4	RB binding protein 4, chromatin remodeling factor
chr13	26789348	26789673	326	*	Peak_8326	40	.	Distal Intergenic	13	26755200	26760785	5586	2	2835	ENST00000405846.4	-28563	ENSG00000132975	GPR12	G protein-coupled receptor 12
chr13	26879801	26880229	429	*	Peak_16369	28	.	Distal Intergenic	13	26755200	26760785	5586	2	2835	ENST00000405846.4	-119016	ENSG00000132975	GPR12	G protein-coupled receptor 12
chr13	26934783	26935107	325	*	Peak_20702	20	.	Distal Intergenic	13	27089438	27095706	6269	2	219333	ENST00000612674.1	160599	ENSG00000152484	USP12	ubiquitin specific peptidase 12
chr13	27355752	27356312	561	*	Peak_9413	37	.	Distal Intergenic	13	27424544	27435688	11145	1	2971	ENST00000381140.8	-68232	ENSG00000122034	GTF3A	general transcription factor IIIA
chr13	27789311	27789540	230	*	Peak_11628	34	.	Distal Intergenic	13	27792643	27794768	2126	1	219409	ENST00000302945.2	-3103	ENSG00000169840	GSX1	GS homeobox 1
chr13	27815262	27815539	278	*	Peak_1421	60	.	Distal Intergenic	13	27792643	27794768	2126	1	219409	ENST00000302945.2	22619	ENSG00000169840	GSX1	GS homeobox 1
chr13	27921174	27921403	230	*	Peak_1897	58	.	Promoter (1-2kb)	13	27920020	27926231	6212	1	3651	ENST00000381033.4	1154	ENSG00000139515	PDX1	pancreatic and duodenal homeobox 1
chr13	27969252	27969481	230	*	Peak_2309	54	.	Promoter (1-2kb)	13	27962137	27971139	9003	2	1045	ENST00000381020.7	1658	ENSG00000165556	CDX2	caudal type homeobox 2
chr13	28306078	28306394	317	*	Peak_8694	39	.	Promoter (2-3kb)	13	28303126	28308434	5309	2	2321	ENST00000617835.4	2040	ENSG00000102755	FLT1	fms related tyrosine kinase 1
chr13	28740394	28740742	349	*	Peak_1805	58	.	Distal Intergenic	13	28700717	28718970	18254	2	283537	ENST00000380814.4	-21424	ENSG00000139508	SLC46A3	solute carrier family 46 member 3
chr13	28806382	28806631	250	*	Peak_7115	41	.	Distal Intergenic	13	28820348	29505947	685600	1	23281	ENST00000612955.4	-13717	ENSG00000132938	MTUS2	microtubule associated scaffold protein 2
chr13	30322380	30322739	360	*	Peak_19522	24	.	Distal Intergenic	13	30202630	30307484	104855	2	84056	ENST00000380615.7	-14896	ENSG00000102781	KATNAL1	katanin catalytic subunit A1 like 1
chr13	30889491	30889873	383	*	Peak_5413	45	.	Intron (ENST00000592950.5/100507064, intron 3 of 5)	13	30882551	30883395	845	1	440132	ENST00000440633.1	6940	ENSG00000236094	LINC00545	long intergenic non-protein coding RNA 545
chr13	31005095	31005704	610	*	Peak_6523	42	.	Distal Intergenic	13	30956958	30975500	18543	1	122046	ENST00000530916.1	48137	ENSG00000175664	TEX26	testis expressed 26
chr13	31104529	31104860	332	*	Peak_14355	31	.	Intron (ENST00000425638.2/ENST00000425638.2, intron 10 of 15)	13	31136625	31138568	1944	2	10808	ENST00000435381.5	33708	ENSG00000120694	HSPH1	heat shock protein family H (Hsp110) member 1
chr13	31121228	31121498	271	*	Peak_1803	58	.	Distal Intergenic	13	31136625	31138568	1944	2	10808	ENST00000435381.5	17070	ENSG00000120694	HSPH1	heat shock protein family H (Hsp110) member 1
chr13	31341293	31341593	301	*	Peak_7589	40	.	Distal Intergenic	13	31260407	31284755	24349	1	145173	ENST00000461652.2	80886	ENSG00000187676	B3GLCT	beta 3-glucosyltransferase
chr13	31353366	31354206	841	*	Peak_11632	34	.	Distal Intergenic	13	31260407	31284755	24349	1	145173	ENST00000461652.2	92959	ENSG00000187676	B3GLCT	beta 3-glucosyltransferase
chr13	31364452	31365034	583	*	Peak_4403	46	.	Distal Intergenic	13	31260407	31284755	24349	1	145173	ENST00000461652.2	104045	ENSG00000187676	B3GLCT	beta 3-glucosyltransferase
chr13	31411354	31411719	366	*	Peak_13338	33	.	Distal Intergenic	13	31260407	31284755	24349	1	145173	ENST00000461652.2	150947	ENSG00000187676	B3GLCT	beta 3-glucosyltransferase
chr13	31852398	31852963	566	*	Peak_18358	26	.	Intron (ENST00000645780.1/10129, intron 1 of 61)	13	31846841	31953472	106632	1	196549	ENST00000428783.1	5557	NA	EEF1DP3	eukaryotic translation elongation factor 1 delta pseudogene 3
chr13	32110771	32111027	257	*	Peak_9780	36	.	Intron (ENST00000645780.1/10129, intron 4 of 61)	13	32060864	32117470	56607	1	10129	ENST00000436046.1	49907	ENSG00000073910	FRY	FRY microtubule binding protein
chr13	32129902	32130281	380	*	Peak_1986	57	.	Intron (ENST00000645780.1/10129, intron 8 of 61)	13	32060864	32117470	56607	1	10129	ENST00000436046.1	69038	ENSG00000073910	FRY	FRY microtubule binding protein
chr13	32578149	32578447	299	*	Peak_13059	34	.	Distal Intergenic	13	32586427	32778019	191593	1	23047	ENST00000315596.14	-7980	ENSG00000083642	PDS5B	PDS5 cohesin associated factor B
chr13	32857293	32857823	531	*	Peak_4011	47	.	Distal Intergenic	13	32877431	32911650	34220	2	100874167	ENST00000421002.1	53827	NA	LINC00423	long intergenic non-protein coding RNA 423
chr13	32950799	32951050	252	*	Peak_4407	46	.	Distal Intergenic	13	32877431	32911650	34220	2	100874167	ENST00000421002.1	-39149	NA	LINC00423	long intergenic non-protein coding RNA 423
chr13	33061476	33062275	800	*	Peak_481	81	.	Exon (ENST00000487852.1/9365, exon 4 of 5)	13	33016433	33066145	49713	1	9365	ENST00000380099.3	45043	ENSG00000133116	KL	klotho
chr13	33768267	33768629	363	*	Peak_4408	46	.	Distal Intergenic	13	33818049	33837496	19448	1	5983	ENST00000380071.7	-49420	ENSG00000133119	RFC3	replication factor C subunit 3
chr13	33793169	33793529	361	*	Peak_10950	35	.	Distal Intergenic	13	33818049	33837496	19448	1	5983	ENST00000380071.7	-24520	ENSG00000133119	RFC3	replication factor C subunit 3
chr13	34322402	34322652	251	*	Peak_10156	36	.	Distal Intergenic	13	34348043	34614170	266128	1	105370158	ENST00000605909.1	-25391	NA	LINC02343	long intergenic non-protein coding RNA 2343
chr13	34381190	34381541	352	*	Peak_18652	25	.	Intron (ENST00000605909.1/105370158, intron 1 of 3)	13	34348043	34614170	266128	1	105370158	ENST00000605909.1	33147	NA	LINC02343	long intergenic non-protein coding RNA 2343
chr13	34508724	34509092	369	*	Peak_11024	35	.	Intron (ENST00000605909.1/105370158, intron 2 of 3)	13	34533846	34534350	505	2	100874179	ENST00000428706.1	25258	ENSG00000225179	LINC00457	long intergenic non-protein coding RNA 457
chr13	34681822	34682071	250	*	Peak_5386	46	.	Distal Intergenic	13	34435450	34640685	205236	2	100874179	ENST00000440160.1	-41137	ENSG00000225179	LINC00457	long intergenic non-protein coding RNA 457
chr13	34789440	34789958	519	*	Peak_7590	40	.	Distal Intergenic	13	34435450	34640685	205236	2	100874179	ENST00000440160.1	-148755	ENSG00000225179	LINC00457	long intergenic non-protein coding RNA 457
chr13	34974933	34975503	571	*	Peak_1698	59	.	Intron (ENST00000400445.7/26960, intron 1 of 57)	13	34942660	35672736	730077	1	26960	ENST00000379939.6	32273	ENSG00000172915	NBEA	neurobeachin
chr13	35336187	35336629	443	*	Peak_13687	32	.	Intron (ENST00000400445.7/26960, intron 36 of 57)	13	35476749	35672735	195987	1	26960	ENST00000537702.5	-140120	ENSG00000172915	NBEA	neurobeachin
chr1	3358755	3359500	746	*	Peak_7323	40	.	Intron (ENST00000511072.5/63976, intron 3 of 15)	1	3396491	3434293	37803	1	63976	ENST00000509860.1	-36991	ENSG00000142611	PRDM16	PR/SET domain 16
chr13	36262287	36262571	285	*	Peak_2364	53	.	Intron (ENST00000511166.1/100526761, intron 2 of 15)	13	36227120	36297749	70630	2	728591	ENST00000239860.10	35178	ENSG00000242715	CCDC169	coiled-coil domain containing 169
chr13	36268477	36268877	401	*	Peak_5929	44	.	Intron (ENST00000511166.1/100526761, intron 2 of 15)	13	36227120	36297749	70630	2	728591	ENST00000239860.10	28872	ENSG00000242715	CCDC169	coiled-coil domain containing 169
chr13	36519294	36519531	238	*	Peak_1422	60	.	Distal Intergenic	13	36432523	36442870	10348	1	8900	ENST00000625767.1	86771	ENSG00000133101	CCNA1	cyclin A1
chr13	36553666	36554043	378	*	Peak_9136	38	.	Distal Intergenic	13	36673912	36697839	23928	1	400120	ENST00000315190.3	-119869	ENSG00000180440	SERTM1	serine rich and transmembrane domain containing 1
chr13	36636601	36636866	266	*	Peak_7592	40	.	Distal Intergenic	13	36673912	36697839	23928	1	400120	ENST00000315190.3	-37046	ENSG00000180440	SERTM1	serine rich and transmembrane domain containing 1
chr13	36674349	36674660	312	*	Peak_752	72	.	Promoter (<=1kb)	13	36673912	36697839	23928	1	400120	ENST00000315190.3	437	ENSG00000180440	SERTM1	serine rich and transmembrane domain containing 1
chr13	36677032	36677370	339	*	Peak_14303	31	.	Intron (ENST00000315190.3/400120, intron 1 of 1)	13	36673912	36697839	23928	1	400120	ENST00000315190.3	3120	ENSG00000180440	SERTM1	serine rich and transmembrane domain containing 1
chr13	36710550	36711084	535	*	Peak_2894	52	.	Distal Intergenic	13	36673912	36697839	23928	1	400120	ENST00000315190.3	36638	ENSG00000180440	SERTM1	serine rich and transmembrane domain containing 1
chr13	36722577	36722870	294	*	Peak_9137	38	.	Distal Intergenic	13	36673912	36697839	23928	1	400120	ENST00000315190.3	48665	ENSG00000180440	SERTM1	serine rich and transmembrane domain containing 1
chr13	36755893	36756156	264	*	Peak_11637	34	.	Distal Intergenic	13	36819224	36829104	9881	1	5994	ENST00000255476.2	-63068	ENSG00000133111	RFXAP	regulatory factor X associated protein
chr13	37165757	37166968	1212	*	Peak_442	82	.	Exon (ENST00000365525.1/ENST00000365525.1, exon 1 of 1)	13	37103259	37105664	2406	2	122011	ENST00000379800.4	-60093	ENSG00000180138	CSNK1A1L	casein kinase 1 alpha 1 like
chr13	38077837	38078199	363	*	Peak_7283	40	.	Intron (ENST00000434565.5/100874188, intron 3 of 5)	13	38053920	38061453	7534	2	100874188	ENST00000451826.1	-16384	ENSG00000223685	LINC00571	long intergenic non-protein coding RNA 571
chr13	38475733	38476137	405	*	Peak_11638	34	.	Distal Intergenic	13	38533343	38545299	11957	2	101929121	ENST00000414161.1	69162	NA	LINC00437	long intergenic non-protein coding RNA 437
chr13	38778351	38778700	350	*	Peak_1424	60	.	Intron (ENST00000280481.8/341640, intron 4 of 23)	13	38821696	38850235	28540	1	341640	ENST00000482551.1	-42996	ENSG00000150893	FREM2	FRAS1 related extracellular matrix 2
chr13	38779810	38780207	398	*	Peak_333	90	.	Intron (ENST00000280481.8/341640, intron 4 of 23)	13	38821696	38850235	28540	1	341640	ENST00000482551.1	-41489	ENSG00000150893	FREM2	FRAS1 related extracellular matrix 2
chr13	38850777	38851152	376	*	Peak_11639	34	.	Exon (ENST00000280481.8/341640, exon 10 of 24)	13	38821798	38827570	5773	2	100874073	ENST00000448887.1	-23207	NA	FREM2-AS1	FREM2 antisense RNA 1
chr13	38905229	38905458	230	*	Peak_12855	34	.	Distal Intergenic	13	38821798	38827570	5773	2	100874073	ENST00000448887.1	-77659	NA	FREM2-AS1	FREM2 antisense RNA 1
chr13	39321649	39321939	291	*	Peak_1254	62	.	Intron (ENST00000648377.1/10186, intron 4 of 13)	13	39042058	39044464	2407	1	387921	ENST00000485407.1	279591	ENSG00000188811	NHLRC3	NHL repeat containing 3
chr13	39835244	39835683	440	*	Peak_10556	35	.	Distal Intergenic	13	39687543	39689820	2278	1	57511	ENST00000460701.1	147701	ENSG00000133103	COG6	component of oligomeric golgi complex 6
chr13	39906970	39907216	247	*	Peak_7593	40	.	Distal Intergenic	13	39687543	39689820	2278	1	57511	ENST00000460701.1	219427	ENSG00000133103	COG6	component of oligomeric golgi complex 6
chr13	39983093	39983559	467	*	Peak_383	87	.	Distal Intergenic	13	40181809	40189028	7220	1	100874127	ENST00000455241.1	-198250	ENSG00000230710	LINC00332	long intergenic non-protein coding RNA 332
chr13	40061589	40062202	614	*	Peak_17677	27	.	Distal Intergenic	13	40181809	40189028	7220	1	100874127	ENST00000455241.1	-119607	ENSG00000230710	LINC00332	long intergenic non-protein coding RNA 332
chr13	40247534	40247773	240	*	Peak_8947	38	.	Intron (ENST00000615947.1/ENST00000615947.1, intron 1 of 3)	13	40194509	40220502	25994	2	400123	ENST00000617777.1	-27032	ENSG00000215483	LINC00548	long intergenic non-protein coding RNA 548
chr13	40251960	40252242	283	*	Peak_11248	34	.	Intron (ENST00000615947.1/ENST00000615947.1, intron 1 of 3)	13	40194509	40220502	25994	2	400123	ENST00000617777.1	-31458	ENSG00000215483	LINC00548	long intergenic non-protein coding RNA 548
chr13	40259223	40259544	322	*	Peak_7118	41	.	Intron (ENST00000615947.1/ENST00000615947.1, intron 1 of 3)	13	40194509	40220502	25994	2	400123	ENST00000617777.1	-38721	ENSG00000215483	LINC00548	long intergenic non-protein coding RNA 548
chr13	40463917	40464310	394	*	Peak_1425	60	.	Intron (ENST00000637523.1/646982, intron 3 of 10)	13	40452657	40460409	7753	2	646982	ENST00000400431.2	-3508	ENSG00000215483	LINC00598	long intergenic non-protein coding RNA 598
chr13	40479920	40480238	319	*	Peak_14776	31	.	Promoter (<=1kb)	13	40450934	40481006	30073	2	646982	ENST00000616706.4	768	ENSG00000215483	LINC00598	long intergenic non-protein coding RNA 598
chr13	40543188	40543431	244	*	Peak_10383	35	.	Intron (ENST00000636651.1/2308, intron 2 of 3)	13	40458903	40535807	76905	2	646982	ENST00000615137.1	-7381	ENSG00000215483	LINC00598	long intergenic non-protein coding RNA 598
chr13	40880550	40880864	315	*	Peak_5635	45	.	Intron (ENST00000379515.3/100616668, intron 1 of 4)	13	40822296	40864352	42057	2	100616668	ENST00000458118.5	-16198	NA	TPTE2P5	transmembrane phosphoinositide 3-phosphatase and tensin homolog 2 pseudogene 5
chr13	41121384	41121773	390	*	Peak_6506	42	.	Distal Intergenic	13	41127569	41132746	5178	2	89890	ENST00000379485.1	10973	ENSG00000165572	KBTBD6	kelch repeat and BTB domain containing 6
chr13	41575390	41575638	249	*	Peak_2288	54	.	Intron (ENST00000379310.7/23078, intron 43 of 44)	13	41568286	41568395	110	2	100847026	ENST00000583027.1	-6995	ENSG00000284584	MIR5006	microRNA 5006
chr13	42402119	42402399	281	*	Peak_1426	60	.	Intron (ENST00000637462.1/105370177, intron 4 of 7)	13	42424892	42485956	61065	1	105370177	ENST00000637043.1	-22493	ENSG00000283554	LINC02341	long intergenic non-protein coding RNA 2341
chr13	42770661	42770916	256	*	Peak_17335	28	.	Distal Intergenic	13	42781550	42791547	9998	1	144809	ENST00000537894.5	-10634	ENSG00000179813	FAM216B	family with sequence similarity 216 member B
chr13	42839615	42839996	382	*	Peak_3657	47	.	Promoter (2-3kb)	13	42842414	42842887	474	2	104355147	ENST00000415620.1	2891	NA	LINC00428	long intergenic non-protein coding RNA 428
chr13	43193777	43194093	317	*	Peak_9201	38	.	Distal Intergenic	13	43158631	43159466	836	1	100874159	ENST00000425609.1	35146	NA	LINC00400	long intergenic non-protein coding RNA 400
chr13	43368522	43368803	282	*	Peak_19352	25	.	Intron (ENST00000261488.10/55068, intron 5 of 16)	13	43359732	43361365	1634	2	55068	ENST00000482207.1	-7157	ENSG00000120658	ENOX1	ecto-NOX disulfide-thiol exchanger 1
chr13	43969701	43970062	362	*	Peak_11646	34	.	Exon (ENST00000378718.2/ENST00000378718.2, exon 1 of 1)	13	43921572	44028526	106955	1	121838	ENST00000629019.2	48129	NA	LINC00284	long intergenic non-protein coding RNA 284
chr13	44041318	44041801	484	*	Peak_5900	44	.	Distal Intergenic	13	44025319	44029937	4619	1	121838	ENST00000423211.1	15999	NA	LINC00284	long intergenic non-protein coding RNA 284
chr13	44156056	44156572	517	*	Peak_7414	40	.	Promoter (1-2kb)	13	44146470	44158222	11753	2	100874377	ENST00000415082.1	1650	ENSG00000235285	SMIM2-IT1	SMIM2 intronic transcript 1
chr13	44587260	44587744	485	*	Peak_1337	60	.	Distal Intergenic	13	44433519	44576565	143047	2	8848	ENST00000458659.2	-10695	ENSG00000102804	TSC22D1	TSC22 domain family member 1
chr13	44659410	44659831	422	*	Peak_20465	20	.	Intron (ENST00000426509.1/106144541, intron 1 of 2)	13	44651812	44701016	49205	1	106144541	ENST00000426509.1	7598	NA	LINC00407	long intergenic non-protein coding RNA 407
chr13	44827541	44827791	251	*	Peak_7043	41	.	Distal Intergenic	13	44799503	44809630	10128	2	144817	ENST00000414562.1	-17911	ENSG00000235097	LINC00330	long intergenic non-protein coding RNA 330
chr13	45579334	45579629	296	*	Peak_10557	35	.	Intron (ENST00000298738.2/220081, intron 7 of 14)	13	45544760	45555467	10708	2	220081	ENST00000482992.1	-23867	ENSG00000165837	ERICH6B	glutamate rich 6B
chr13	45654685	45655078	394	*	Peak_10559	35	.	Distal Intergenic	13	45541297	45615739	74443	2	220081	ENST00000298738.2	-38946	ENSG00000165837	ERICH6B	glutamate rich 6B
chr13	45724813	45725439	627	*	Peak_2092	56	.	Distal Intergenic	13	45703128	45714559	11432	1	220082	ENST00000378966.3	21685	ENSG00000174015	SPERT	spermatid associated
chr13	45740484	45741044	561	*	Peak_3768	47	.	Distal Intergenic	13	45703128	45714559	11432	1	220082	ENST00000378966.3	37356	ENSG00000174015	SPERT	spermatid associated
chr13	46098499	46098918	420	*	Peak_10561	35	.	Exon (ENST00000624622.2/100509894, exon 4 of 6)	13	46053195	46105018	51824	2	1361	ENST00000645658.1	6100	ENSG00000080618	CPB2	carboxypeptidase B2
chr13	46113607	46114017	411	*	Peak_8630	39	.	Intron (ENST00000624622.2/100509894, intron 5 of 5)	13	46053195	46105033	51839	2	1361	ENST00000181383.9	-8574	ENSG00000080618	CPB2	carboxypeptidase B2
chr13	46230245	46230593	349	*	Peak_2456	53	.	Intron (ENST00000446175.5/220416, intron 4 of 9)	13	46213035	46277366	64332	1	220416	ENST00000595396.1	17210	ENSG00000173988	LRRC63	leucine rich repeat containing 63
chr13	46330576	46330818	243	*	Peak_18825	25	.	Distal Intergenic	13	46342964	46351007	8044	2	80183	ENST00000487195.5	20189	ENSG00000102445	RUBCNL	rubicon like autophagy enhancer
chr13	46898279	46898598	320	*	Peak_1849	58	.	Promoter (1-2kb)	13	46831555	46897076	65522	2	3356	ENST00000543956.4	-1203	ENSG00000102468	HTR2A	5-hydroxytryptamine receptor 2A
chr13	47547952	47548319	368	*	Peak_18826	25	.	Distal Intergenic	13	47930153	47932622	2470	2	100861549	ENST00000566385.2	384303	ENSG00000260388	LINC00562	long intergenic non-protein coding RNA 562
chr13	48171810	48172378	569	*	Peak_11649	34	.	Distal Intergenic	13	48232612	48261875	29264	1	9445	ENST00000649266.1	-60234	ENSG00000136156	ITM2B	integral membrane protein 2B
chr13	48185294	48185690	397	*	Peak_3885	47	.	Distal Intergenic	13	48232612	48261875	29264	1	9445	ENST00000649266.1	-46922	ENSG00000136156	ITM2B	integral membrane protein 2B
chr13	48551224	48551957	734	*	Peak_3853	47	.	Intron (ENST00000643064.1/5925, intron 1 of 1)	13	48488970	48533256	44287	2	1102	ENST00000544904.3	-17968	ENSG00000136161	RCBTB2	RCC1 and BTB domain containing protein 2
chr13	48567646	48567968	323	*	Peak_2904	52	.	Intron (ENST00000643064.1/5925, intron 1 of 1)	13	48576974	48578088	1115	2	100129597	ENST00000425350.1	10120	ENSG00000233610	LINC00462	long intergenic non-protein coding RNA 462
chr13	48584613	48585006	394	*	Peak_19353	25	.	Intron (ENST00000643064.1/5925, intron 1 of 1)	13	48576974	48578088	1115	2	100129597	ENST00000425350.1	-6525	ENSG00000233610	LINC00462	long intergenic non-protein coding RNA 462
chr13	48610311	48610642	332	*	Peak_17336	28	.	Distal Intergenic	13	48576974	48578088	1115	2	100129597	ENST00000425350.1	-32223	ENSG00000233610	LINC00462	long intergenic non-protein coding RNA 462
chr13	48728687	48729003	317	*	Peak_4014	47	.	Distal Intergenic	13	48653729	48706861	53133	1	57105	ENST00000622559.4	74958	ENSG00000152207	CYSLTR2	cysteinyl leukotriene receptor 2
chr13	48729835	48730369	535	*	Peak_19576	24	.	Distal Intergenic	13	48653729	48706861	53133	1	57105	ENST00000622559.4	76106	ENSG00000152207	CYSLTR2	cysteinyl leukotriene receptor 2
chr13	48876255	48877068	814	*	Peak_7391	40	.	Distal Intergenic	13	48975912	49209779	233868	1	22862	ENST00000492622.6	-98844	ENSG00000102531	FNDC3A	fibronectin type III domain containing 3A
chr1	34904093	34904541	449	*	Peak_5267	46	.	Promoter (<=1kb)	1	34865436	34905383	39948	2	58512	ENST00000235180.4	842	ENSG00000116544	DLGAP3	DLG associated protein 3
chr1	34915258	34915513	256	*	Peak_7119	41	.	Intron (ENST00000373347.5/58512, intron 1 of 11)	1	34865436	34905383	39948	2	58512	ENST00000235180.4	-9875	ENSG00000116544	DLGAP3	DLG associated protein 3
chr1	34931081	34931375	295	*	Peak_20704	20	.	Promoter (1-2kb)	1	34865436	34929585	64150	2	58512	ENST00000373347.5	-1496	ENSG00000116544	DLGAP3	DLG associated protein 3
chr13	49665442	49665823	382	*	Peak_3303	50	.	Intron (ENST00000473576.6/84650, intron 1 of 2)	13	49660723	49691438	30716	2	84650	ENST00000473576.6	25615	ENSG00000123179	EBPL	EBP like
chr1	34974453	34974735	283	*	Peak_1332	60	.	3' UTR	1	34975699	34978706	3008	2	653160	ENST00000311990.4	3971	ENSG00000241014	LOC653160	uncharacterized LOC653160
chr13	50541618	50541884	267	*	Peak_7120	41	.	Intron (ENST00000479420.5/10301, intron 4 of 5)	13	50520933	50527449	6517	2	103689915	ENST00000428276.1	-14169	ENSG00000186047	DLEU1-AS1	DLEU1 antisense RNA 1
chr13	50574342	50574937	596	*	Peak_4416	46	.	Intron (ENST00000479420.5/10301, intron 4 of 5)	13	50520933	50527449	6517	2	103689915	ENST00000428276.1	-46893	ENSG00000186047	DLEU1-AS1	DLEU1 antisense RNA 1
chr13	50889367	50889596	230	*	Peak_11651	34	.	Promoter (1-2kb)	13	50862172	50891474	29303	2	100874255	ENST00000631080.2	1878	NA	RNASEH2B-AS1	RNASEH2B antisense RNA 1
chr13	51017133	51017503	371	*	Peak_7600	40	.	Intron (ENST00000643529.1/79621, intron 5 of 5)	13	51004253	51007860	3608	2	2974	ENST00000485590.1	-9273	ENSG00000123201	GUCY1B2	guanylate cyclase 1 soluble subunit beta 2 (pseudogene)
chr13	51076885	51077204	320	*	Peak_11652	34	.	Intron (ENST00000533288.5/2974, intron 1 of 3)	13	50994693	51080831	86139	2	2974	ENST00000533288.5	3627	ENSG00000123201	GUCY1B2	guanylate cyclase 1 soluble subunit beta 2 (pseudogene)
chr13	51089388	51089673	286	*	Peak_9523	37	.	Intron (ENST00000563710.6/647166, intron 1 of 3)	13	51016108	51080862	64755	2	2974	ENST00000532104.1	-8526	ENSG00000123201	GUCY1B2	guanylate cyclase 1 soluble subunit beta 2 (pseudogene)
chr13	51171619	51171848	230	*	Peak_4418	46	.	Promoter (<=1kb)	13	51084124	51172222	88099	2	647166	ENST00000569306.1	374	ENSG00000226792	C13orf42	chromosome 13 open reading frame 42
chr13	51741104	51741414	311	*	Peak_7022	41	.	Promoter (1-2kb)	13	51739148	51753123	13976	1	115825	ENST00000460145.2	1956	ENSG00000139668	WDFY2	WD repeat and FYVE domain containing 2
chr1	35873050	35873616	567	*	Peak_13236	33	.	Exon (ENST00000604465.1/ENST00000604465.1, exon 1 of 1)	1	35869808	35920958	51151	1	26523	ENST00000373206.5	3242	ENSG00000092847	AGO1	argonaute RISC component 1
chr1	36016659	36017347	689	*	Peak_1751	59	.	Intron (ENST00000373191.8/192669, intron 11 of 18)	1	36043264	36055262	11999	1	192669	ENST00000471099.1	-25917	ENSG00000126070	AGO3	argonaute RISC catalytic component 3
chr1	36207025	36207315	291	*	Peak_2034	57	.	Distal Intergenic	1	36224416	36305357	80942	1	9967	ENST00000354618.9	-17101	ENSG00000054118	THRAP3	thyroid hormone receptor associated protein 3
chr1	36215032	36215301	270	*	Peak_15774	29	.	Distal Intergenic	1	36224416	36305357	80942	1	9967	ENST00000354618.9	-9115	ENSG00000054118	THRAP3	thyroid hormone receptor associated protein 3
chr1	36708793	36709112	320	*	Peak_3603	48	.	Intron (ENST00000641463.1/ENST00000641463.1, intron 1 of 1)	1	36849948	36853687	3740	2	2899	ENST00000479620.1	144575	ENSG00000163873	GRIK3	glutamate ionotropic receptor kainate type subunit 3
chr1	36743640	36744129	490	*	Peak_7601	40	.	Distal Intergenic	1	36849948	36853687	3740	2	2899	ENST00000479620.1	109558	ENSG00000163873	GRIK3	glutamate ionotropic receptor kainate type subunit 3
chr1	36819529	36819930	402	*	Peak_18828	25	.	Exon (ENST00000373091.7/2899, exon 12 of 16)	1	36849948	36853687	3740	2	2899	ENST00000479620.1	33757	ENSG00000163873	GRIK3	glutamate ionotropic receptor kainate type subunit 3
chr13	73821429	73821686	258	*	Peak_18829	25	.	Intron (ENST00000377669.6/11278, intron 3 of 6)	13	73686089	73995049	308961	2	11278	ENST00000377669.6	173363	ENSG00000118922	KLF12	Kruppel like factor 12
chr1	3761529	3762177	649	*	Peak_6196	43	.	Intron (ENST00000294600.6/148870, intron 5 of 11)	1	3752445	3771645	19201	1	148870	ENST00000462521.2	9084	ENSG00000162592	CCDC27	coiled-coil domain containing 27
chr1	37767886	37768115	230	*	Peak_13858	32	.	Promoter (2-3kb)	1	37760272	37765133	4862	2	284656	ENST00000319637.6	-2753	ENSG00000183317	EPHA10	EPH receptor A10
chr1	38079503	38079789	287	*	Peak_13691	32	.	Intron (ENST00000432922.5/ENST00000432922.5, intron 1 of 3)	1	38089231	38089329	99	1	100500801	ENST00000582606.1	-9442	ENSG00000265596	MIR3659	microRNA 3659
chr1	38109450	38109720	271	*	Peak_1769	59	.	Intron (ENST00000428151.1/ENST00000428151.1, intron 4 of 4)	1	38089231	38089329	99	1	100500801	ENST00000582606.1	20219	ENSG00000265596	MIR3659	microRNA 3659
chr1	38335042	38335286	245	*	Peak_18830	25	.	Distal Intergenic	1	38210658	38214806	4149	2	339442	ENST00000649079.1	-120236	ENSG00000237290	LINC01343	long intergenic non-protein coding RNA 1343
chr1	38606977	38607224	248	*	Peak_4425	46	.	Distal Intergenic	1	38475196	38476484	1289	1	105378656	ENST00000452971.1	131781	ENSG00000238063	LINC01685	long intergenic non-protein coding RNA 1685
chr1	38927893	38928166	274	*	Peak_3453	49	.	Promoter (1-2kb)	1	38886296	38926837	40542	2	54933	ENST00000289248.6	-1056	ENSG00000158315	RHBDL2	rhomboid like 2
chr1	38973462	38973940	479	*	Peak_1690	59	.	Distal Intergenic	1	38991223	39006059	14837	1	79647	ENST00000432648.7	-17283	ENSG00000174574	AKIRIN1	akirin 1
chr1	38988219	38988521	303	*	Peak_1866	58	.	Promoter (2-3kb)	1	38991223	39006059	14837	1	79647	ENST00000432648.7	-2702	ENSG00000174574	AKIRIN1	akirin 1
chr1	39376646	39377079	434	*	Peak_5859	44	.	Intron (ENST00000567887.5/23499, intron 52 of 100)	1	39409503	39428092	18590	1	23499	ENST00000530275.3	-32424	ENSG00000127603	MACF1	microtubule actin crosslinking factor 1
chr1	39699949	39700301	353	*	Peak_16115	29	.	Intron (ENST00000470018.5/10450, intron 1 of 7)	1	39692182	39745403	53222	1	10450	ENST00000470018.5	7767	ENSG00000084072	PPIE	peptidylprolyl isomerase E
chr13	99287085	99287363	279	*	Peak_4427	46	.	Intron (ENST00000355700.9/337867, intron 2 of 4)	13	99294530	99307405	12876	2	1880	ENST00000376414.4	20042	ENSG00000169508	GPR183	G protein-coupled receptor 183
chr13	99802660	99803337	678	*	Peak_11661	34	.	Intron (ENST00000376355.7/171425, intron 2 of 7)	13	99858861	99865238	6378	1	171425	ENST00000416504.5	-55524	ENSG00000125246	CLYBL	citrate lyase beta like
chr1	40350337	40350612	276	*	Peak_14484	31	.	Intron (ENST00000435168.6/64744, intron 1 of 6)	1	40344850	40414240	69391	1	64744	ENST00000435168.6	5487	ENSG00000084070	SMAP2	small ArfGAP2
chr1	40659366	40659871	506	*	Peak_2723	53	.	Intron (ENST00000372684.7/9783, intron 1 of 7)	1	40626214	40665445	39232	2	9783	ENST00000372683.1	5574	ENSG00000117016	RIMS3	regulating synaptic membrane exocytosis 3
chr14	100149035	100149450	416	*	Peak_4016	47	.	Exon (ENST00000305631.6/123099, exon 2 of 3)	14	100148985	100155717	6733	2	123099	ENST00000557117.1	6267	ENSG00000168350	DEGS2	delta 4-desaturase, sphingolipid 2
chr14	100217804	100218036	233	*	Peak_3016	51	.	Intron (ENST00000554537.1/ENST00000554537.1, intron 1 of 1)	14	100238985	100282792	43808	1	7528	ENST00000262238.8	-20949	ENSG00000100811	YY1	YY1 transcription factor
chr14	102516690	102517108	419	*	Peak_3487	48	.	Distal Intergenic	14	102506876	102509799	2924	2	122416	ENST00000560748.5	-6891	ENSG00000156381	ANKRD9	ankyrin repeat domain 9
chr14	103229325	103229569	245	*	Peak_19354	25	.	Distal Intergenic	14	103187221	103189028	1808	2	100131366	ENST00000514902.2	-40297	ENSG00000251533	LINC00605	long intergenic non-protein coding RNA 605
chr14	103836557	103836830	274	*	Peak_2459	53	.	Intron (ENST00000202556.13/23368, intron 1 of 16)	14	103754165	103840107	85943	2	23368	ENST00000554106.5	3277	ENSG00000088808	PPP1R13B	protein phosphatase 1 regulatory subunit 13B
chr14	103855231	103855727	497	*	Peak_8246	40	.	Intron (ENST00000556586.1/145216, intron 2 of 2)	14	103847721	103858049	10329	1	145216	ENST00000556586.1	7510	ENSG00000258735	LINC00637	long intergenic non-protein coding RNA 637
chr14	104032833	104033070	238	*	Peak_4428	46	.	Intron (ENST00000409874.8/122402, intron 30 of 35)	14	104049418	104052665	3248	1	122402	ENST00000462273.1	-16348	ENSG00000156414	TDRD9	tudor domain containing 9
chr14	104037019	104037314	296	*	Peak_1431	60	.	Intron (ENST00000409874.8/122402, intron 32 of 35)	14	104049418	104052665	3248	1	122402	ENST00000462273.1	-12104	ENSG00000156414	TDRD9	tudor domain containing 9
chr14	104078195	104078766	572	*	Peak_571	77	.	Distal Intergenic	14	104085679	104115581	29903	1	374569	ENST00000551177.5	-6913	ENSG00000166183	ASPG	asparaginase
chr14	104135619	104136092	474	*	Peak_4017	47	.	Promoter (2-3kb)	14	104138723	104179790	41068	1	26153	ENST00000423312.6	-2631	ENSG00000066735	KIF26A	kinesin family member 26A
chr14	104226314	104226578	265	*	Peak_1854	58	.	Promoter (2-3kb)	14	104223614	104243747	20134	1	145195	ENST00000555282.1	2700	ENSG00000258913	LINC02691	long intergenic non-protein coding RNA 2691
chr14	104265751	104266089	339	*	Peak_20116	22	.	Intron (ENST00000553757.1/145195, intron 1 of 2)	14	104223614	104243747	20134	1	145195	ENST00000555282.1	42137	ENSG00000258913	LINC02691	long intergenic non-protein coding RNA 2691
chr14	104267281	104267609	329	*	Peak_7606	40	.	Intron (ENST00000553757.1/145195, intron 1 of 2)	14	104223614	104243747	20134	1	145195	ENST00000555282.1	43667	ENSG00000258913	LINC02691	long intergenic non-protein coding RNA 2691
chr14	104331670	104332287	618	*	Peak_1432	60	.	Distal Intergenic	14	104223614	104243747	20134	1	145195	ENST00000555282.1	108056	ENSG00000258913	LINC02691	long intergenic non-protein coding RNA 2691
chr14	104427438	104427839	402	*	Peak_13692	32	.	Distal Intergenic	14	104579684	104590515	10832	1	400258	ENST00000557649.5	-151845	ENSG00000184601	C14orf180	chromosome 14 open reading frame 180
chr14	104574208	104574483	276	*	Peak_6097	43	.	Intron (ENST00000415614.6/388021, intron 3 of 3)	14	104579684	104590515	10832	1	400258	ENST00000557649.5	-5201	ENSG00000184601	C14orf180	chromosome 14 open reading frame 180
chr14	105478780	105479054	275	*	Peak_3351	49	.	Promoter (<=1kb)	14	105478592	105479293	702	1	1397	ENST00000551738.1	188	ENSG00000182809	CRIP2	cysteine rich protein 2
chr14	105562551	105563588	1038	*	Peak_519	80	.	Distal Intergenic	14	105528624	105530202	1579	1	80757	ENST00000431372.1	33927	ENSG00000184986	TMEM121	transmembrane protein 121
chr14	105589038	105589311	274	*	Peak_2289	54	.	Distal Intergenic	14	105621116	105621180	65	1	102465871	ENST00000616769.1	-31805	ENSG00000274172	MIR8071-1	microRNA 8071-1
chr14	105622555	105623302	748	*	Peak_9348	37	.	Promoter (1-2kb)	14	105621116	105621180	65	1	102465871	ENST00000616769.1	1439	ENSG00000274172	MIR8071-1	microRNA 8071-1
chr14	105624676	105625171	496	*	Peak_3077	51	.	Exon (ENST00000641978.1/ENST00000641978.1, exon 3 of 6)	14	105621116	105621180	65	1	102465871	ENST00000616769.1	3560	ENSG00000274172	MIR8071-1	microRNA 8071-1
chr14	105826757	105827018	262	*	Peak_9926	36	.	Distal Intergenic	14	105857513	105857572	60	2	100616374	ENST00000579784.1	30554	ENSG00000265612	MIR4539	microRNA 4539
chr14	105848684	105848937	254	*	Peak_13177	33	.	Distal Intergenic	14	105857513	105857572	60	2	100616374	ENST00000579784.1	8635	ENSG00000265612	MIR4539	microRNA 4539
chr14	106030491	106030742	252	*	Peak_4429	46	.	Distal Intergenic	14	105969729	105972269	2541	2	8755	ENST00000606026.2	-58222	ENSG00000271968	ADAM6	ADAM metallopeptidase domain 6 (pseudogene)
chr14	106808184	106808413	230	*	Peak_7607	40	.	Distal Intergenic	14	106850885	106850999	115	2	100847062	ENST00000583555.1	42586	ENSG00000265929	MIR5195	microRNA 5195
chr1	41521489	41522251	763	*	Peak_768	71	.	Intron (ENST00000643665.1/59269, intron 5 of 7)	1	41479127	41484673	5547	2	1907	ENST00000490783.5	-36816	ENSG00000127129	EDN2	endothelin 2
chr1	41925329	41925834	506	*	Peak_4018	47	.	Intron (ENST00000489103.5/59269, intron 1 of 3)	1	41506365	41918707	412343	2	59269	ENST00000372584.5	-6622	ENSG00000127124	HIVEP3	human immunodeficiency virus type I enhancer binding protein 3
chr14	19732902	19733352	451	*	Peak_9279	37	.	Intron (ENST00000557414.1/390429, intron 1 of 4)	14	19719015	19827513	108499	1	390429	ENST00000557414.1	13887	ENSG00000176294	OR4N2	olfactory receptor family 4 subfamily N member 2
chr1	41973389	41973817	429	*	Peak_5980	44	.	Intron (ENST00000489103.5/59269, intron 1 of 3)	1	41506365	41918707	412343	2	59269	ENST00000372584.5	-54682	ENSG00000127124	HIVEP3	human immunodeficiency virus type I enhancer binding protein 3
chr14	19852918	19853162	245	*	Peak_9307	37	.	Distal Intergenic	14	19868197	19869143	947	2	283617	ENST00000425829.2	15981	ENSG00000176290	OR4K3	olfactory receptor family 4 subfamily K member 3 (gene/pseudogene)
chr14	20545048	20545301	254	*	Peak_17607	27	.	Distal Intergenic	14	20556094	20558657	2564	2	390443	ENST00000611135.1	13356	ENSG00000188655	RNASE9	ribonuclease A family member 9 (inactive)
chr14	20701268	20701758	491	*	Peak_8600	39	.	Intron (ENST00000554286.1/ENST00000554286.1, intron 1 of 3)	14	20688782	20700602	11821	1	6038	ENST00000555597.1	12486	ENSG00000258818	RNASE4	ribonuclease A family member 4
chr14	20723234	20723491	258	*	Peak_4430	46	.	Distal Intergenic	14	20745892	20748380	2489	1	10876	ENST00000326842.2	-22401	ENSG00000181562	EDDM3A	epididymal protein 3A
chr14	20801501	20802090	590	*	Peak_5	1000	.	Promoter (<=1kb)	14	20801356	20802406	1051	2	6035	ENST00000412779.2	316	ENSG00000129538	RNASE1	ribonuclease A family member 1, pancreatic
chr14	21078751	21079207	457	*	Peak_14966	30	.	Promoter (1-2kb)	14	21080897	21089545	8649	1	55701	ENST00000554514.1	-1690	ENSG00000165801	ARHGEF40	Rho guanine nucleotide exchange factor 40
chr1	42116345	42116626	282	*	Peak_6740	41	.	Distal Intergenic	1	42153421	42155824	2404	1	2981	ENST00000372581.1	-36795	ENSG00000044012	GUCA2B	guanylate cyclase activator 2B
chr14	22723952	22724397	446	*	Peak_10574	35	.	Intron (ENST00000650620.1/ENST00000650620.1, intron 3 of 4)	14	22766522	22771789	5268	1	5018	ENST00000285848.9	-42125	ENSG00000155463	OXA1L	OXA1L mitochondrial inner membrane protein
chr14	23448147	23448441	295	*	Peak_18837	25	.	Distal Intergenic	14	23412738	23435718	22981	2	4625	ENST00000355349.3	-12429	ENSG00000092054	MYH7	myosin heavy chain 7
chr14	23693321	23693594	274	*	Peak_11668	34	.	Distal Intergenic	14	23639339	23645295	5957	1	10202	ENST00000553600.1	53982	ENSG00000100867	DHRS2	dehydrogenase/reductase 2
chr1	43006170	43006494	325	*	Peak_12929	34	.	Distal Intergenic	1	42925375	42959176	33802	2	6513	ENST00000426263.8	-46994	ENSG00000117394	SLC2A1	solute carrier family 2 member 1
chr1	43021376	43021748	373	*	Peak_9783	36	.	Distal Intergenic	1	42925375	42959176	33802	2	6513	ENST00000426263.8	-62200	ENSG00000117394	SLC2A1	solute carrier family 2 member 1
chr14	30268755	30268984	230	*	Peak_11670	34	.	Intron (ENST00000549360.1/ENST00000549360.1, intron 1 of 2)	14	29663812	30191898	528087	2	5587	ENST00000549503.1	-76857	ENSG00000184304	PRKD1	protein kinase D1
chr14	31150292	31150528	237	*	Peak_7610	40	.	Intron (ENST00000611816.4/25831, intron 12 of 44)	14	31135542	31136838	1297	2	25831	ENST00000554850.1	-13454	ENSG00000092148	HECTD1	HECT domain E3 ubiquitin protein ligase 1
chr14	31770385	31770695	311	*	Peak_7612	40	.	Intron (ENST00000550649.5/80224, intron 3 of 5)	14	31800857	31850095	49239	1	80224	ENST00000551015.1	-30162	ENSG00000151413	NUBPL	nucleotide binding protein like
chr14	31901728	31902040	313	*	Peak_7613	40	.	Distal Intergenic	14	31944853	31950382	5530	1	105370439	ENST00000553330.1	-42813	ENSG00000258474	LINC02313	long intergenic non-protein coding RNA 2313
chr1	43250283	43250566	284	*	Peak_2944	52	.	Exon (ENST00000474566.1/ENST00000474566.1, exon 1 of 5)	1	43269994	43274002	4009	1	128218	ENST00000439858.5	-19428	ENSG00000179178	TMEM125	transmembrane protein 125
chr14	32637933	32638171	239	*	Peak_11671	34	.	Intron (ENST00000280979.8/9472, intron 7 of 13)	14	32616978	32732765	115788	1	9472	ENST00000555950.5	20955	ENSG00000151320	AKAP6	A-kinase anchoring protein 6
chr1	43272728	43273223	496	*	Peak_17102	28	.	Promoter (1-2kb)	1	43270946	43272769	1824	1	128218	ENST00000456751.1	1782	ENSG00000179178	TMEM125	transmembrane protein 125
chr1	43308898	43309646	749	*	Peak_9625	37	.	Promoter (<=1kb)	1	43309047	43312601	3555	1	7075	ENST00000488437.1	0	ENSG00000066056	TIE1	tyrosine kinase with immunoglobulin like and EGF like domains 1
chr14	34657584	34657813	230	*	Peak_7615	40	.	Distal Intergenic	14	34562409	34630183	67775	2	58533	ENST00000362031.8	-27401	ENSG00000129515	SNX6	sorting nexin 6
chr1	43544262	43544496	235	*	Peak_6098	43	.	Promoter (<=1kb)	1	43545076	43579284	34209	1	5792	ENST00000437607.1	-580	ENSG00000142949	PTPRF	protein tyrosine phosphatase receptor type F
chr14	37632609	37632845	237	*	Peak_4439	46	.	Intron (ENST00000533625.5/319089, intron 2 of 18)	14	37622065	37842463	220399	1	319089	ENST00000553443.5	10544	ENSG00000139865	TTC6	tetratricopeptide repeat domain 6
chr1	43902790	43903207	418	*	Peak_9051	38	.	Intron (ENST00000645057.1/9682, intron 23 of 25)	1	43899588	43930176	30589	1	6487	ENST00000490502.1	3202	ENSG00000126091	ST3GAL3	ST3 beta-galactoside alpha-2,3-sialyltransferase 3
chr1	44180205	44180534	330	*	Peak_12930	34	.	Distal Intergenic	1	44213455	44220681	7227	1	55929	ENST00000361745.10	-32921	ENSG00000178028	DMAP1	DNA methyltransferase 1 associated protein 1
chr1	44525118	44525564	447	*	Peak_3078	51	.	Intron (ENST00000355387.6/55182, intron 2 of 14)	1	44545493	44545552	60	1	100847089	ENST00000581357.1	-19929	ENSG00000263381	MIR5584	microRNA 5584
chr1	44588011	44588621	611	*	Peak_1262	62	.	Intron (ENST00000355387.6/55182, intron 2 of 14)	1	44614265	44627057	12793	1	55182	ENST00000496262.1	-25644	ENSG00000187147	RNF220	ring finger protein 220
chr14	49675309	49675750	442	*	Peak_19401	25	.	Intron (ENST00000216367.9/5427, intron 3 of 18)	14	49643586	49688197	44612	2	5427	ENST00000556584.5	12447	ENSG00000100479	POLE2	DNA polymerase epsilon 2, accessory subunit
chr1	44968541	44968973	433	*	Peak_2093	56	.	Intron (ENST00000620860.4/8891, intron 3 of 10)	1	44926628	44986586	59959	2	8891	ENST00000477953.5	17613	ENSG00000070785	EIF2B3	eukaryotic translation initiation factor 2B subunit gamma
chr14	50146278	50146507	230	*	Peak_13693	32	.	Intron (ENST00000216373.9/6655, intron 14 of 22)	14	50109537	50116600	7064	2	79609	ENST00000395859.2	-29678	ENSG00000100483	VCPKMT	valosin containing protein lysine methyltransferase
chr14	50237769	50238216	448	*	Peak_5638	45	.	Intron (ENST00000261699.8/79944, intron 9 of 9)	14	50117120	50231558	114439	2	6655	ENST00000216373.9	-6211	ENSG00000100485	SOS2	SOS Ras/Rho guanine nucleotide exchange factor 2
chr1	45080894	45081261	368	*	Peak_11677	34	.	Intron (ENST00000359600.5/57643, intron 2 of 13)	1	45014547	45015405	859	1	7389	ENST00000465678.1	66347	ENSG00000126088	UROD	uroporphyrinogen decarboxylase
chr14	51149428	51149805	378	*	Peak_7617	40	.	Distal Intergenic	14	50975262	51096061	120800	2	114088	ENST00000298355.7	-53367	ENSG00000100505	TRIM9	tripartite motif containing 9
chr14	51346290	51346548	259	*	Peak_17608	27	.	Intron (ENST00000556479.5/283553, intron 1 of 4)	14	51333542	51342967	9426	1	283553	ENST00000557295.1	12748	ENSG00000258479	LINC00640	long intergenic non-protein coding RNA 640
chr1	45253538	45253789	252	*	Peak_8950	38	.	Intron (ENST00000464588.1/57643, intron 2 of 2)	1	45016399	45206556	190158	2	57643	ENST00000359600.5	-46982	ENSG00000162415	ZSWIM5	zinc finger SWIM-type containing 5
chr1	45275175	45275404	230	*	Peak_11679	34	.	Intron (ENST00000464588.1/57643, intron 2 of 2)	1	45303910	45305619	1710	1	400752	ENST00000626198.1	-28506	ENSG00000281912	LINC01144	long intergenic non-protein coding RNA 1144
chr14	53289963	53290331	369	*	Peak_16392	28	.	Intron (ENST00000454942.5/ENST00000454942.5, intron 2 of 3)	14	53153354	53157528	4175	1	101927620	ENST00000554235.1	136609	ENSG00000258731	LOC101927620	uncharacterized LOC101927620
chr14	53423850	53424285	436	*	Peak_7619	40	.	Intron (ENST00000456100.5/ENST00000456100.5, intron 3 of 3)	14	53153354	53157528	4175	1	101927620	ENST00000554235.1	270496	ENSG00000258731	LOC101927620	uncharacterized LOC101927620
chr14	54959530	54959815	286	*	Peak_1438	60	.	Intron (ENST00000360586.7/11169, intron 21 of 25)	14	54941271	54944607	3337	2	11169	ENST00000475379.1	-14923	ENSG00000198554	WDHD1	WD repeat and HMG-box DNA binding protein 1
chr14	55389728	55390139	412	*	Peak_5569	45	.	Promoter (1-2kb)	14	55366392	55391302	24911	2	22863	ENST00000558189.1	1163	ENSG00000126775	ATG14	autophagy related 14
chr1	45561731	45562005	275	*	Peak_14213	32	.	5' UTR	1	45566869	45570049	3181	1	10327	ENST00000497973.5	-4864	ENSG00000117448	AKR1A1	aldo-keto reductase family 1 member A1
chr1	45740194	45740579	386	*	Peak_7364	40	.	Intron (ENST00000359942.8/3652, intron 3 of 9)	1	45698711	45750649	51939	2	3652	ENST00000396478.3	10070	ENSG00000197429	IPP	intracisternal A particle-promoted polypeptide
chr14	57865652	57865938	287	*	Peak_7620	40	.	Promoter (<=1kb)	14	57563922	57866062	302141	2	341880	ENST00000556826.5	124	ENSG00000151812	SLC35F4	solute carrier family 35 member F4
chr14	59319523	59319835	313	*	Peak_7621	40	.	Intron (ENST00000360909.7/23002, intron 4 of 24)	14	59324350	59326115	1766	1	23002	ENST00000556894.1	-4515	ENSG00000100592	DAAM1	dishevelled associated activator of morphogenesis 1
chr14	59688026	59688441	416	*	Peak_16394	28	.	Intron (ENST00000267484.9/6252, intron 3 of 8)	14	59596005	59727713	131709	2	6252	ENST00000432103.6	39272	ENSG00000139970	RTN1	reticulon 1
chr14	60348282	60348628	347	*	Peak_17531	27	.	Distal Intergenic	14	60323236	60323907	672	1	101927729	ENST00000554773.1	25046	ENSG00000258556	LINC02322	long intergenic non-protein coding RNA 2322
chr14	60550692	60550922	231	*	Peak_4444	46	.	Intron (ENST00000557618.1/ENST00000557618.1, intron 1 of 1)	14	60478357	60515543	37187	2	317761	ENST00000556799.1	-35149	ENSG00000179008	C14orf39	chromosome 14 open reading frame 39
chr14	60839645	60839904	260	*	Peak_10576	35	.	Intron (ENST00000261245.8/4331, intron 6 of 7)	14	60811987	60968680	156694	1	4331	ENST00000557134.1	27658	ENSG00000020426	MNAT1	MNAT1 component of CDK activating kinase
chr14	61288268	61288521	254	*	Peak_18841	25	.	Intron (ENST00000555185.5/5583, intron 1 of 3)	14	61277370	61281840	4471	2	161291	ENST00000555868.1	-6428	ENSG00000182107	TMEM30B	transmembrane protein 30B
chr14	61422585	61422904	320	*	Peak_7623	40	.	Intron (ENST00000555185.5/5583, intron 1 of 3)	14	61442558	61450941	8384	1	5583	ENST00000557473.1	-19654	ENSG00000027075	PRKCH	protein kinase C eta
chr1	46146211	46146534	324	*	Peak_12931	34	.	Intron (ENST00000540385.2/110117499, intron 1 of 9)	1	46134531	46139081	4551	1	101929626	ENST00000452785.2	11680	ENSG00000227857	LOC101929626	uncharacterized LOC101929626
chr1	4615525	4615754	230	*	Peak_11686	34	.	Distal Intergenic	1	4654732	4777794	123063	1	55966	ENST00000378190.7	-38978	ENSG00000196581	AJAP1	adherens junctions associated protein 1
chr1	46237541	46237950	410	*	Peak_2999	51	.	Distal Intergenic	1	46247688	46261358	13671	1	8438	ENST00000463715.5	-9738	ENSG00000085999	RAD54L	RAD54 like
chr14	63605548	63606062	515	*	Peak_16395	28	.	Intron (ENST00000394942.2/112840, intron 1 of 1)	14	63598502	63641407	42906	2	112840	ENST00000267522.7	35345	ENSG00000140006	WDR89	WD repeat domain 89
chr14	63715472	63715947	476	*	Peak_20470	20	.	Intron (ENST00000247225.6/81537, intron 1 of 2)	14	63684214	63728039	43826	2	81537	ENST00000247225.6	12092	ENSG00000126821	SGPP1	sphingosine-1-phosphate phosphatase 1
chr14	64852959	64853473	515	*	Peak_7625	40	.	Intron (ENST00000556626.5/6710, intron 1 of 35)	14	64766399	64879837	113439	2	6710	ENST00000389721.10	26364	ENSG00000070182	SPTB	spectrin beta, erythrocytic
chr14	66940769	66941079	311	*	Peak_11688	34	.	Intron (ENST00000315266.9/10243, intron 7 of 21)	14	66824474	67058726	234253	1	10243	ENST00000555456.1	116295	ENSG00000171723	GPHN	gephyrin
chr1	46724122	46724829	708	*	Peak_15953	29	.	Distal Intergenic	1	46675159	46719064	43906	2	9813	ENST00000371933.7	-5058	ENSG00000159658	EFCAB14	EF-hand calcium binding domain 14
chr1	46764174	46764775	602	*	Peak_4446	46	.	Intron (ENST00000546128.5/1580, intron 1 of 5)	1	46757838	46810850	53013	1	1580	ENST00000546128.5	6336	ENSG00000142973	CYP4B1	cytochrome P450 family 4 subfamily B member 1
chr14	68062238	68062584	347	*	Peak_15784	29	.	Intron (ENST00000479335.5/5890, intron 8 of 11)	14	68000279	68497257	496979	1	5890	ENST00000557045.5	61959	ENSG00000182185	RAD51B	RAD51 paralog B
chr1	46812686	46813101	416	*	Peak_2832	52	.	Promoter (1-2kb)	1	46811103	46817181	6079	1	1580	ENST00000468637.3	1583	ENSG00000142973	CYP4B1	cytochrome P450 family 4 subfamily B member 1
chr14	68603637	68603930	294	*	Peak_1135	64	.	Intron (ENST00000487861.5/5890, intron 10 of 10)	14	68627166	68628445	1280	2	100996664	ENST00000556301.1	24515	NA	LOC100996664	uncharacterized LOC100996664
chr14	69186191	69186533	343	*	Peak_1440	60	.	Intron (ENST00000554898.1/ENST00000554898.1, intron 2 of 2)	14	69191511	69242358	50848	1	55218	ENST00000409018.7	-4978	ENSG00000081177	EXD2	exonuclease 3'-5' domain containing 2
chr14	69483134	69483383	250	*	Peak_5197	46	.	Promoter (1-2kb)	14	69484692	69503690	18999	1	400224	ENST00000556123.1	-1309	ENSG00000175985	PLEKHD1	pleckstrin homology and coiled-coil domain containing D1
chr1	46967669	46968052	384	*	Peak_14490	31	.	Exon (ENST00000563017.1/ENST00000563017.1, exon 1 of 1)	1	46930048	46941484	11437	2	1579	ENST00000474458.5	-26185	ENSG00000187048	CYP4A11	cytochrome P450 family 4 subfamily A member 11
chr1	46976390	46976709	320	*	Peak_11690	34	.	Distal Intergenic	1	46930048	46941484	11437	2	1579	ENST00000474458.5	-34906	ENSG00000187048	CYP4A11	cytochrome P450 family 4 subfamily A member 11
chr14	70111905	70112264	360	*	Peak_20708	20	.	Intron (ENST00000356921.6/6547, intron 2 of 6)	14	70044255	70080206	35952	2	6547	ENST00000216568.11	-31699	ENSG00000100678	SLC8A3	solute carrier family 8 member A3
chr1	47035448	47035964	517	*	Peak_10581	35	.	Promoter (<=1kb)	1	47036108	47039723	3616	1	260293	ENST00000466294.1	-144	ENSG00000186377	CYP4X1	cytochrome P450 family 4 subfamily X member 1
chr14	73141261	73141500	240	*	Peak_2290	54	.	Intron (ENST00000557356.5/5663, intron 1 of 4)	14	73136817	73220401	83585	1	5663	ENST00000394164.5	4444	ENSG00000080815	PSEN1	presenilin 1
chr14	73816176	73816417	242	*	Peak_5688	44	.	Distal Intergenic	14	73822559	73830135	7577	2	100506498	ENST00000555539.1	13718	ENSG00000258586	LINC02274	long intergenic non-protein coding RNA 2274
chr14	74358287	74358717	431	*	Peak_7628	40	.	Exon (ENST00000256362.4/55237, exon 2 of 2)	14	74348413	74360008	11596	1	55237	ENST00000256362.4	9874	ENSG00000133980	VRTN	vertebrae development associated
chr14	74803957	74804186	230	*	Peak_12932	34	.	Intron (ENST00000552421.5/56252, intron 5 of 19)	14	74809632	74822115	12484	1	56252	ENST00000547879.5	-5446	ENSG00000119596	YLPM1	YLP motif containing 1
chr14	75279374	75280215	842	*	Peak_6885	41	.	Promoter (<=1kb)	14	75279643	75281684	2042	1	2353	ENST00000555686.1	0	ENSG00000170345	FOS	Fos proto-oncogene, AP-1 transcription factor subunit
chr14	75280897	75281245	349	*	Peak_7277	40	.	Promoter (<=1kb)	14	75280193	75281587	1395	1	2353	ENST00000555347.1	704	ENSG00000170345	FOS	Fos proto-oncogene, AP-1 transcription factor subunit
chr14	75282715	75283682	968	*	Peak_14272	31	.	Promoter (2-3kb)	14	75280193	75281587	1395	1	2353	ENST00000555347.1	2522	ENSG00000170345	FOS	Fos proto-oncogene, AP-1 transcription factor subunit
chr14	75360495	75360757	263	*	Peak_7629	40	.	Distal Intergenic	14	75294407	75296638	2232	1	731223	ENST00000558575.1	66088	NA	LINC01220	long intergenic non-protein coding RNA 1220
chr14	75551550	75551968	419	*	Peak_5903	44	.	Distal Intergenic	14	75578617	75648167	69551	1	55640	ENST00000238667.8	-26649	ENSG00000119686	FLVCR2	feline leukemia virus subgroup C cellular receptor family member 2
chr14	75571289	75571648	360	*	Peak_11694	34	.	Distal Intergenic	14	75578617	75648167	69551	1	55640	ENST00000238667.8	-6969	ENSG00000119686	FLVCR2	feline leukemia virus subgroup C cellular receptor family member 2
chr14	75571844	75572599	756	*	Peak_706	73	.	Downstream (2-3kb)	14	75578617	75648167	69551	1	55640	ENST00000238667.8	-6018	ENSG00000119686	FLVCR2	feline leukemia virus subgroup C cellular receptor family member 2
chr14	76423366	76423653	288	*	Peak_4450	46	.	Intron (ENST00000512784.6/2103, intron 1 of 6)	14	76407538	76498511	90974	1	2103	ENST00000556177.1	15828	ENSG00000119715	ESRRB	estrogen related receptor beta
chr14	76493021	76493255	235	*	Peak_7631	40	.	Intron (ENST00000512784.6/2103, intron 6 of 6)	14	76439642	76463427	23786	1	2103	ENST00000509323.1	53379	ENSG00000119715	ESRRB	estrogen related receptor beta
chr14	76567590	76567839	250	*	Peak_10582	35	.	Intron (ENST00000554926.1/ENST00000554926.1, intron 2 of 3)	14	76439642	76463427	23786	1	2103	ENST00000509323.1	127948	ENSG00000119715	ESRRB	estrogen related receptor beta
chr1	47667606	47667840	235	*	Peak_8795	38	.	Distal Intergenic	1	47436017	47440691	4675	1	2306	ENST00000334793.5	231589	ENSG00000186564	FOXD2	forkhead box D2
chr14	76866452	76866784	333	*	Peak_1720	59	.	Intron (ENST00000393774.7/145497, intron 12 of 13)	14	76826387	76844472	18086	1	145497	ENST00000460005.1	40065	ENSG00000100565	LRRC74A	leucine rich repeat containing 74A
chr14	78738957	78739187	231	*	Peak_11696	34	.	Intron (ENST00000634499.1/9369, intron 8 of 19)	14	78698220	78709641	11422	1	9369	ENST00000557081.1	40737	ENSG00000021645	NRXN3	neurexin 3
chr1	47941690	47941938	249	*	Peak_6743	41	.	Intron (ENST00000606738.2/388630, intron 2 of 6)	1	47775238	47994212	218975	2	388630	ENST00000435576.2	52274	ENSG00000269113	TRABD2B	TraB domain containing 2B
chr14	80899292	80899521	230	*	Peak_7634	40	.	Intron (ENST00000281129.7/145508, intron 6 of 23)	14	80830165	80904928	74764	2	145508	ENST00000554827.5	5407	ENSG00000100629	CEP128	centrosomal protein 128
chr1	48115412	48115671	260	*	Peak_7635	40	.	Intron (ENST00000604015.1/391037, intron 1 of 1)	1	48096092	48127948	31857	2	391037	ENST00000604015.1	12277	NA	SKINT1L	Skint1 like (pseudogene)
chr14	89185662	89186096	435	*	Peak_18326	26	.	Promoter (<=1kb)	14	89180756	89185873	5118	2	1112	ENST00000556541.1	0	ENSG00000053254	FOXN3	forkhead box N3
chr14	90274237	90274553	317	*	Peak_13102	34	.	3' UTR	14	90278061	90279283	1223	2	55051	ENST00000557732.1	4730	ENSG00000119720	NRDE2	NRDE-2, necessary for RNA interference, domain containing
chr1	49043894	49044131	238	*	Peak_11703	34	.	Promoter (1-2kb)	1	48583870	49045714	461845	2	84871	ENST00000416121.5	1583	ENSG00000186094	AGBL4	ATP/GTP binding protein like 4
chr14	90466082	90466355	274	*	Peak_4453	46	.	Distal Intergenic	14	90455329	90458905	3577	1	400238	ENST00000444942.1	10753	ENSG00000233208	LINC00642	long intergenic non-protein coding RNA 642
chr14	90985145	90985499	355	*	Peak_13498	33	.	Intron (ENST00000614987.4/9252, intron 2 of 16)	14	90872074	90978524	106451	2	9252	ENST00000556178.5	-6621	ENSG00000100784	RPS6KA5	ribosomal protein S6 kinase A5
chr14	91202515	91202796	282	*	Peak_1346	60	.	Intron (ENST00000520328.5/80017, intron 13 of 14)	14	91196393	91220766	24374	1	80017	ENST00000522816.1	6122	ENSG00000133943	DGLUCY	D-glutamate cyclase
chr14	91873988	91874217	230	*	Peak_16405	28	.	Promoter (<=1kb)	14	91869412	91874816	5405	2	10516	ENST00000556961.1	599	ENSG00000140092	FBLN5	fibulin 5
chr14	92261323	92261643	321	*	Peak_16406	28	.	Intron (ENST00000553537.1/ENST00000553537.1, intron 1 of 1)	14	92322581	92496251	173671	1	123041	ENST00000393265.6	-60938	ENSG00000140090	SLC24A4	solute carrier family 24 member 4
chr14	92300058	92300387	330	*	Peak_11708	34	.	Distal Intergenic	14	92322581	92496251	173671	1	123041	ENST00000393265.6	-22194	ENSG00000140090	SLC24A4	solute carrier family 24 member 4
chr14	92323119	92323436	318	*	Peak_2465	53	.	Promoter (<=1kb)	14	92323193	92496251	173059	1	123041	ENST00000531433.5	0	ENSG00000140090	SLC24A4	solute carrier family 24 member 4
chr14	92339872	92340101	230	*	Peak_7638	40	.	Intron (ENST00000393265.6/123041, intron 2 of 16)	14	92323605	92501483	177879	1	123041	ENST00000532405.5	16267	ENSG00000140090	SLC24A4	solute carrier family 24 member 4
chr14	92760891	92761590	700	*	Peak_630	75	.	Distal Intergenic	14	92703809	92748702	44894	2	5641	ENST00000334869.8	-12189	ENSG00000100600	LGMN	legumain
chr14	94820002	94820530	529	*	Peak_2466	53	.	Distal Intergenic	14	94768216	94770230	2015	2	145258	ENST00000238558.4	-49772	ENSG00000133937	GSC	goosecoid homeobox
chr14	95044987	95045440	454	*	Peak_7640	40	.	Distal Intergenic	14	95088665	95091322	2658	2	23405	ENST00000527416.2	45882	ENSG00000100697	DICER1	dicer 1, ribonuclease III
chr14	95604783	95605118	336	*	Peak_4456	46	.	Distal Intergenic	14	95573605	95578684	5080	1	100506999	ENST00000553785.1	31178	ENSG00000258390	LINC02318	long intergenic non-protein coding RNA 2318
chr14	96059477	96059943	467	*	Peak_16410	28	.	Intron (ENST00000555004.2/56967, intron 1 of 1)	14	96039384	96086809	47426	1	56967	ENST00000553782.1	20093	ENSG00000227051	C14orf132	chromosome 14 open reading frame 132
chr14	96091368	96091615	248	*	Peak_9350	37	.	3' UTR	14	96039384	96086809	47426	1	56967	ENST00000553782.1	51984	ENSG00000227051	C14orf132	chromosome 14 open reading frame 132
chr14	96707048	96707797	750	*	Peak_1443	60	.	Distal Intergenic	14	96738021	96790637	52617	1	105370646	ENST00000650059.1	-30224	ENSG00000258979	LINC02299	long intergenic non-protein coding RNA 2299
chr14	99962656	99963009	354	*	Peak_13985	32	.	Distal Intergenic	14	99971449	100144236	172788	1	51466	ENST00000402714.6	-8440	ENSG00000196405	EVL	Enah/Vasp-like
chr1	50085824	50086061	238	*	Peak_11712	34	.	Intron (ENST00000448907.6/1996, intron 1 of 6)	1	50103910	50203770	99861	1	1996	ENST00000371827.5	-17849	ENSG00000162374	ELAVL4	ELAV like RNA binding protein 4
chr1	50335189	50335445	257	*	Peak_11714	34	.	Distal Intergenic	1	50417550	50421632	4083	2	63950	ENST00000418121.5	86187	ENSG00000142700	DMRTA2	DMRT like family A2
chr15	100200567	100200796	230	*	Peak_4457	46	.	Intron (ENST00000268070.8/170691, intron 7 of 21)	15	100168388	100261505	93118	2	170691	ENST00000559976.1	60709	ENSG00000140470	ADAMTS17	ADAM metallopeptidase with thrombospondin type 1 motif 17
chr15	100206388	100206809	422	*	Peak_3888	47	.	Intron (ENST00000268070.8/170691, intron 7 of 21)	15	100168388	100261505	93118	2	170691	ENST00000559976.1	54696	ENSG00000140470	ADAMTS17	ADAM metallopeptidase with thrombospondin type 1 motif 17
chr15	100257164	100257423	260	*	Peak_11715	34	.	Intron (ENST00000268070.8/170691, intron 6 of 21)	15	100168388	100261505	93118	2	170691	ENST00000559976.1	4082	ENSG00000140470	ADAMTS17	ADAM metallopeptidase with thrombospondin type 1 motif 17
chr15	100283493	100283783	291	*	Peak_15318	30	.	Intron (ENST00000268070.8/170691, intron 3 of 21)	15	100256422	100262387	5966	2	170691	ENST00000560486.2	-21106	ENSG00000140470	ADAMTS17	ADAM metallopeptidase with thrombospondin type 1 motif 17
chr15	100896899	100897382	484	*	Peak_4178	46	.	Promoter (<=1kb)	15	100898060	100907230	9171	1	220	ENST00000558869.1	-678	ENSG00000184254	ALDH1A3	aldehyde dehydrogenase 1 family member A3
chr15	100988579	100989200	622	*	Peak_8698	39	.	Exon (ENST00000388948.7/79705, exon 5 of 34)	15	101021709	101024949	3241	1	79705	ENST00000525617.2	-32509	ENSG00000154237	LRRK1	leucine rich repeat kinase 1
chr15	101393720	101394094	375	*	Peak_3662	47	.	Intron (ENST00000611716.4/5046, intron 7 of 21)	15	101365785	101382206	16422	2	5046	ENST00000558154.1	-11514	ENSG00000140479	PCSK6	proprotein convertase subtilisin/kexin type 6
chr15	101498418	101498715	298	*	Peak_8174	40	.	Intron (ENST00000557794.5/5046, intron 1 of 4)	15	101364908	101489984	125077	2	5046	ENST00000331826.11	-8434	ENSG00000140479	PCSK6	proprotein convertase subtilisin/kexin type 6
chr15	101609608	101610078	471	*	Peak_17341	28	.	Distal Intergenic	15	101613676	101614339	664	2	101927505	ENST00000618724.1	4261	NA	LINC02348	long intergenic non-protein coding RNA 2348
chr1	51794430	51795134	705	*	Peak_1208	63	.	Promoter (<=1kb)	1	51794472	51795708	1237	2	4898	ENST00000475310.5	574	ENSG00000078618	NRDC	nardilysin convertase
chr15	20340366	20340598	233	*	Peak_3457	49	.	Distal Intergenic	15	20283496	20291558	8063	1	646096	ENST00000554701.2	56870	ENSG00000259156	CHEK2P2	checkpoint kinase 2 pseudogene 2
chr1	52189323	52189793	471	*	Peak_1922	57	.	Intron (ENST00000287727.7/9372, intron 1 of 18)	1	52216380	52346686	130307	1	9372	ENST00000371591.1	-26587	ENSG00000157077	ZFYVE9	zinc finger FYVE-type containing 9
chr15	22900580	22900877	298	*	Peak_16120	29	.	Intron (ENST00000617928.4/23191, intron 22 of 30)	15	22869466	22905440	35975	2	23191	ENST00000619348.4	4563	ENSG00000273749	CYFIP1	cytoplasmic FMR1 interacting protein 1
chr1	52864255	52864596	342	*	Peak_20475	20	.	Intron (ENST00000612017.4/440590, intron 4 of 13)	1	52842736	52894998	52263	1	440590	ENST00000371528.1	21519	ENSG00000203995	ZYG11A	zyg-11 family member A, cell cycle regulator
chr1	52872184	52872588	405	*	Peak_2469	53	.	Intron (ENST00000612017.4/440590, intron 7 of 13)	1	52842736	52894998	52263	1	440590	ENST00000371528.1	29448	ENSG00000203995	ZYG11A	zyg-11 family member A, cell cycle regulator
chr15	28886683	28886971	289	*	Peak_4461	46	.	Promoter (<=1kb)	15	28886163	29053897	167735	1	321	ENST00000559709.5	520	ENSG00000034053	APBA2	amyloid beta precursor protein binding family A member 2
chr15	31082585	31082897	313	*	Peak_16414	28	.	Intron (ENST00000397795.6/4308, intron 1 of 26)	15	31001822	31068092	66271	2	4308	ENST00000560801.5	-14493	ENSG00000134160	TRPM1	transient receptor potential cation channel subfamily M member 1
chr15	31228580	31228877	298	*	Peak_16415	28	.	Promoter (<=1kb)	15	31221999	31229384	7386	2	283710	ENST00000560812.5	507	ENSG00000259772	LOC283710	uncharacterized LOC283710
chr15	31272687	31272916	230	*	Peak_4462	46	.	Distal Intergenic	15	31222767	31230838	8072	2	283710	ENST00000558388.6	-41849	ENSG00000259772	LOC283710	uncharacterized LOC283710
chr15	31439310	31439637	328	*	Peak_1291	61	.	Distal Intergenic	15	31393575	31435665	42091	1	51621	ENST00000558225.1	45735	ENSG00000169926	KLF13	Kruppel like factor 13
chr15	32110129	32110358	230	*	Peak_5754	44	.	Promoter (<=1kb)	15	32111180	32171422	60243	1	1139	ENST00000636292.1	-822	ENSG00000175344	CHRNA7	cholinergic receptor nicotinic alpha 7 subunit
chr15	32114610	32114933	324	*	Peak_4464	46	.	Intron (ENST00000635978.1/1139, intron 3 of 6)	15	32111180	32171422	60243	1	1139	ENST00000636292.1	3430	ENSG00000175344	CHRNA7	cholinergic receptor nicotinic alpha 7 subunit
chr15	35401081	35401310	230	*	Peak_7643	40	.	Exon (ENST00000560893.1/ENST00000560893.1, exon 1 of 1)	15	35217345	35410851	193507	2	89978	ENST00000560386.5	9541	ENSG00000134146	DPH6	diphthamine biosynthesis 6
chr1	53554644	53554911	268	*	Peak_1232	62	.	Intron (ENST00000312233.4/148979, intron 3 of 9)	1	53459976	53464679	4704	1	63948	ENST00000463126.1	94668	ENSG00000143006	DMRTB1	DMRT like family B with proline rich C-terminal 1
chr1	53619608	53619837	230	*	Peak_12934	34	.	Intron (ENST00000312233.4/148979, intron 1 of 9)	1	53506237	53734204	227968	2	148979	ENST00000312233.4	114367	ENSG00000174332	GLIS1	GLIS family zinc finger 1
chr1	53628866	53629294	429	*	Peak_9936	36	.	Intron (ENST00000312233.4/148979, intron 1 of 9)	1	53506237	53734204	227968	2	148979	ENST00000312233.4	104910	ENSG00000174332	GLIS1	GLIS family zinc finger 1
chr15	36701908	36702185	278	*	Peak_11722	34	.	Promoter (<=1kb)	15	36702009	36808781	106773	1	84529	ENST00000562489.1	0	ENSG00000186073	C15orf41	chromosome 15 open reading frame 41
chr1	53677109	53677384	276	*	Peak_19960	23	.	Intron (ENST00000312233.4/148979, intron 1 of 9)	1	53506237	53734204	227968	2	148979	ENST00000312233.4	56820	ENSG00000174332	GLIS1	GLIS family zinc finger 1
chr15	37848386	37848834	449	*	Peak_11723	34	.	Distal Intergenic	15	37921939	37936918	14980	1	145942	ENST00000560841.5	-73105	ENSG00000166069	TMCO5A	transmembrane and coiled-coil domains 5A
chr15	38063355	38063645	291	*	Peak_11724	34	.	Distal Intergenic	15	38069481	38071902	2422	2	107984773	ENST00000559232.1	8257	ENSG00000236914	LINC01852	long intergenic non-protein coding RNA 1852
chr15	39689979	39690258	280	*	Peak_13276	33	.	Intron (ENST00000350221.3/161835, intron 10 of 11)	15	39739665	39747447	7783	2	161835	ENST00000559692.1	57189	ENSG00000150667	FSIP1	fibrous sheath interacting protein 1
chr15	39752185	39752551	367	*	Peak_9643	36	.	Intron (ENST00000350221.3/161835, intron 5 of 11)	15	39739665	39747447	7783	2	161835	ENST00000559692.1	-4738	ENSG00000150667	FSIP1	fibrous sheath interacting protein 1
chr15	39857721	39857999	279	*	Peak_3743	47	.	Intron (ENST00000299092.3/11245, intron 1 of 3)	15	39800949	39829276	28328	2	11245	ENST00000543580.7	-28445	ENSG00000166073	GPR176	G protein-coupled receptor 176
chr15	40446059	40446385	327	*	Peak_3032	51	.	Intron (ENST00000561234.5/22893, intron 1 of 6)	15	40441212	40468242	27031	1	22893	ENST00000416165.5	4847	ENSG00000140320	BAHD1	bromo adjacent homology domain containing 1
chr15	40527669	40528100	432	*	Peak_15321	30	.	Intron (ENST00000561460.5/ENST00000561460.5, intron 2 of 3)	15	40561999	40562803	805	2	90416	ENST00000560535.1	34703	ENSG00000128891	CCDC32	coiled-coil domain containing 32
chr15	40660913	40661142	230	*	Peak_5534	45	.	Intron (ENST00000346991.9/57082, intron 26 of 26)	15	40650127	40654977	4851	1	57082	ENST00000532347.1	10786	ENSG00000137812	KNL1	kinetochore scaffold 1
chr15	40851618	40852096	479	*	Peak_14368	31	.	Promoter (1-2kb)	15	40853196	40856826	3631	1	6692	ENST00000566928.5	-1100	ENSG00000166145	SPINT1	serine peptidase inhibitor, Kunitz type 1
chr15	40937484	40937976	493	*	Peak_6016	44	.	Exon (ENST00000650082.1/54567, exon 10 of 11)	15	40930880	40934921	4042	1	54567	ENST00000559440.1	6604	ENSG00000128917	DLL4	delta like canonical Notch ligand 4
chr15	41081388	41081644	257	*	Peak_11727	34	.	Intron (ENST00000648947.1/54617, intron 7 of 35)	15	41069512	41072015	2504	2	54617	ENST00000561172.1	-9373	ENSG00000128908	INO80	INO80 complex ATPase subunit
chr15	41381551	41381851	301	*	Peak_10584	35	.	Distal Intergenic	15	41365747	41377288	11542	1	51203	ENST00000560318.1	15804	ENSG00000137804	NUSAP1	nucleolar and spindle associated protein 1
chr1	54174092	54174450	359	*	Peak_15754	30	.	Promoter (1-2kb)	1	54141224	54172694	31471	2	200008	ENST00000525949.1	-1398	ENSG00000157211	CDCP2	CUB domain containing protein 2
chr1	54178015	54178278	264	*	Peak_1188	63	.	Intron (ENST00000637610.1/200008, intron 3 of 9)	1	54141224	54172694	31471	2	200008	ENST00000525949.1	-5321	ENSG00000157211	CDCP2	CUB domain containing protein 2
chr15	41992454	41992801	348	*	Peak_15882	29	.	Promoter (2-3kb)	15	41986878	41990202	3325	2	123745	ENST00000551073.1	-2252	ENSG00000188089	PLA2G4E	phospholipase A2 group IVE
chr1	54280580	54281310	731	*	Peak_13474	33	.	Intron (ENST00000326956.11/23648, intron 2 of 13)	1	54239096	54257266	18171	2	23648	ENST00000420121.5	-23314	ENSG00000157216	SSBP3	single stranded DNA binding protein 3
chr15	44245592	44245843	252	*	Peak_18206	26	.	Distal Intergenic	15	44288729	44337881	49153	1	113201	ENST00000559222.5	-42886	ENSG00000166734	CASC4	cancer susceptibility 4
chr1	54467859	54468169	311	*	Peak_17059	28	.	Distal Intergenic	1	54243237	54413479	170243	2	23648	ENST00000525990.1	-54380	ENSG00000157216	SSBP3	single stranded DNA binding protein 3
chr1	54582211	54582789	579	*	Peak_17923	26	.	Intron (ENST00000481208.5/26027, intron 1 of 14)	1	54597264	54599658	2395	1	26027	ENST00000479837.1	-14475	ENSG00000162390	ACOT11	acyl-CoA thioesterase 11
chr1	54636443	54636859	417	*	Peak_11729	34	.	3' UTR	1	54641754	54700208	58455	1	374977	ENST00000339553.9	-4895	ENSG00000184313	MROH7	maestro heat like repeat family member 7
chr1	54640914	54641352	439	*	Peak_1448	60	.	Promoter (<=1kb)	1	54641754	54700208	58455	1	374977	ENST00000339553.9	-402	ENSG00000184313	MROH7	maestro heat like repeat family member 7
chr1	54813501	54813765	265	*	Peak_7340	40	.	Intron (ENST00000358193.7/163747, intron 6 of 10)	1	54806102	54842252	36151	1	163747	ENST00000371273.3	7399	ENSG00000162398	LEXM	lymphocyte expansion molecule
chr1	54836445	54836830	386	*	Peak_1185	63	.	Intron (ENST00000358193.7/163747, intron 9 of 10)	1	54806102	54842252	36151	1	163747	ENST00000371273.3	30343	ENSG00000162398	LEXM	lymphocyte expansion molecule
chr15	50496803	50497050	248	*	Peak_4468	46	.	Promoter (1-2kb)	15	50498497	50499407	911	1	9101	ENST00000560379.1	-1447	ENSG00000138592	USP8	ubiquitin specific peptidase 8
chr15	50811409	50811670	262	*	Peak_16422	28	.	Distal Intergenic	15	50702266	50765808	63543	2	84888	ENST00000261854.9	-45601	ENSG00000138600	SPPL2A	signal peptide peptidase like 2A
chr15	51051623	51051931	309	*	Peak_13342	33	.	Intron (ENST00000559909.1/109729174, intron 1 of 2)	15	51037488	51293912	256425	1	109729174	ENST00000559909.1	14135	ENSG00000259240	MIR4713HG	MIR4713 host gene
chr15	51378502	51378856	355	*	Peak_5755	44	.	Promoter (1-2kb)	15	51377456	51405244	27789	1	342035	ENST00000612989.1	1046	ENSG00000186417	GLDN	gliomedin
chr15	52764668	52764938	271	*	Peak_11734	34	.	Intron (ENST00000305901.6/3175, intron 1 of 1)	15	52757440	52781183	23744	2	3175	ENST00000560699.2	16245	ENSG00000169856	ONECUT1	one cut homeobox 1
chr1	55529389	55529690	302	*	Peak_15672	30	.	Intron (ENST00000643167.1/ENST00000643167.1, intron 1 of 3)	1	55225641	55225723	83	1	100616272	ENST00000581938.1	303748	ENSG00000265822	MIR4422	microRNA 4422
chr15	55748633	55748905	273	*	Peak_8328	40	.	Distal Intergenic	15	55738223	55743090	4868	2	283659	ENST00000561292.1	-5543	ENSG00000166450	PRTG	protogenin
chr15	55803182	55803465	284	*	Peak_11737	34	.	Distal Intergenic	15	55738223	55743090	4868	2	283659	ENST00000561292.1	-60092	ENSG00000166450	PRTG	protogenin
chr15	55950047	55950277	231	*	Peak_4471	46	.	Promoter (1-2kb)	15	55862988	55951400	88413	2	4734	ENST00000507063.1	1123	ENSG00000069869	NEDD4	NEDD4 E3 ubiquitin protein ligase
chr1	55625828	55626057	230	*	Peak_11738	34	.	Intron (ENST00000643167.1/ENST00000643167.1, intron 2 of 3)	1	55868254	55950118	81865	1	105378738	ENST00000648749.1	-242197	ENSG00000233079	LINC01755	long intergenic non-protein coding RNA 1755
chr1	55627271	55627530	260	*	Peak_4472	46	.	Intron (ENST00000643167.1/ENST00000643167.1, intron 2 of 3)	1	55868254	55950118	81865	1	105378738	ENST00000648749.1	-240724	ENSG00000233079	LINC01755	long intergenic non-protein coding RNA 1755
chr15	56532928	56533195	268	*	Peak_5904	44	.	Distal Intergenic	15	56428731	56465137	36407	2	55329	ENST00000260453.3	-67791	ENSG00000138587	MNS1	meiosis specific nuclear structural 1
chr15	56716693	56716969	277	*	Peak_1450	60	.	Intron (ENST00000559237.5/54816, intron 1 of 20)	15	56652490	56707318	54829	2	54816	ENST00000560002.5	-9375	ENSG00000137871	ZNF280D	zinc finger protein 280D
chr15	56729137	56729464	328	*	Peak_5271	46	.	Intron (ENST00000559237.5/54816, intron 1 of 20)	15	56697763	56733494	35732	2	54816	ENST00000558320.5	4030	ENSG00000137871	ZNF280D	zinc finger protein 280D
chr15	56867197	56867442	246	*	Peak_10585	35	.	Intron (ENST00000559000.6/54816, intron 3 of 23)	15	56859668	56917648	57981	2	145783	ENST00000559920.5	50206	ENSG00000285331	LOC145783	uncharacterized LOC145783
chr15	57848253	57848486	234	*	Peak_7649	40	.	Distal Intergenic	15	57953429	57964791	11363	2	8854	ENST00000560312.5	116305	ENSG00000128918	ALDH1A2	aldehyde dehydrogenase 1 family member A2
chr1	55912770	55913103	334	*	Peak_4474	46	.	Intron (ENST00000646266.1/ENST00000646266.1, intron 3 of 11)	1	55915609	55944963	29355	2	105378739	ENST00000458145.1	31860	ENSG00000230250	LINC01753	long intergenic non-protein coding RNA 1753
chr15	59166164	59166495	332	*	Peak_9282	37	.	Intron (ENST00000288235.8/4643, intron 22 of 27)	15	59171183	59171262	80	2	100313886	ENST00000517221.1	4767	ENSG00000253030	MIR2116	microRNA 2116
chr15	60590777	60591102	326	*	Peak_20353	21	.	Promoter (1-2kb)	15	60528073	60592517	64445	2	6095	ENST00000558234.1	1415	ENSG00000069667	RORA	RAR related orphan receptor A
chr15	60829203	60829699	497	*	Peak_1451	60	.	Intron (ENST00000335670.10/6095, intron 1 of 10)	15	60511457	60706352	194896	2	6095	ENST00000560004.5	-122851	ENSG00000069667	RORA	RAR related orphan receptor A
chr15	61819620	61819858	239	*	Peak_4477	46	.	Distal Intergenic	15	61854413	61856793	2381	2	54832	ENST00000559119.1	36935	ENSG00000129003	VPS13C	vacuolar protein sorting 13 homolog C
chr15	63854034	63854288	255	*	Peak_10586	35	.	Distal Intergenic	15	63870930	63871019	90	2	494334	ENST00000362286.1	16731	ENSG00000199156	MIR422A	microRNA 422a
chr15	63922998	63924130	1133	*	Peak_14494	31	.	Promoter (1-2kb)	15	63924512	63926074	1563	2	23604	ENST00000558076.1	1944	ENSG00000035664	DAPK2	death associated protein kinase 2
chr15	64029723	64029969	247	*	Peak_7653	40	.	Promoter (<=1kb)	15	63939293	64030020	90728	2	23604	ENST00000559897.1	51	ENSG00000035664	DAPK2	death associated protein kinase 2
chr15	64034710	64034964	255	*	Peak_4478	46	.	Intron (ENST00000261891.7/23604, intron 1 of 10)	15	63939293	64030020	90728	2	23604	ENST00000559897.1	-4690	ENSG00000035664	DAPK2	death associated protein kinase 2
chr15	64145959	64146327	369	*	Peak_6901	41	.	3' UTR	15	64151715	64157481	5767	1	79856	ENST00000557789.5	-5388	ENSG00000157734	SNX22	sorting nexin 22
chr15	64464654	64464949	296	*	Peak_11302	34	.	Intron (ENST00000416172.1/ENST00000416172.1, intron 1 of 1)	15	64444659	64455236	10578	1	9325	ENST00000559777.1	19995	ENSG00000103671	TRIP4	thyroid hormone receptor interactor 4
chr15	64798174	64798411	238	*	Peak_5272	46	.	Distal Intergenic	15	64818010	64818824	815	2	80119	ENST00000559522.1	20413	ENSG00000140451	PIF1	PIF1 5'-to-3' DNA helicase
chr15	64943807	64944326	520	*	Peak_6221	43	.	Intron (ENST00000319580.12/348094, intron 11 of 14)	15	64934113	64943756	9644	1	348094	ENST00000611260.1	9694	ENSG00000166839	ANKDD1A	ankyrin repeat and death domain containing 1A
chr1	56495867	56496286	420	*	Peak_13499	33	.	3' UTR	1	56173433	56512039	338607	2	8613	ENST00000641494.1	15753	ENSG00000162407	PLPP3	phospholipid phosphatase 3
chr15	65042725	65043118	394	*	Peak_14642	31	.	Promoter (2-3kb)	15	65045370	65053396	8027	1	123264	ENST00000334287.2	-2252	ENSG00000186198	SLC51B	solute carrier family 51 beta subunit
chr15	65067430	65067907	478	*	Peak_1871	58	.	Promoter (<=1kb)	15	65054228	65067943	13716	2	51285	ENST00000421977.7	36	ENSG00000103710	RASL12	RAS like family 12
chr15	65116388	65116672	285	*	Peak_870	68	.	Promoter (1-2kb)	15	65092770	65115197	22428	2	390595	ENST00000559089.5	-1191	ENSG00000246922	UBAP1L	ubiquitin associated protein 1 like
chr15	65322170	65322621	452	*	Peak_13846	32	.	Distal Intergenic	15	65331104	65334641	3538	2	9543	ENST00000559231.1	12020	ENSG00000174498	IGDCC3	immunoglobulin superfamily DCC subclass member 3
chr15	65993079	65993489	411	*	Peak_10589	35	.	Intron (ENST00000409699.6/84465, intron 5 of 22)	15	65965175	65971264	6090	2	84465	ENST00000469917.1	-21815	ENSG00000157890	MEGF11	multiple EGF like domains 11
chr15	66023834	66024157	324	*	Peak_8699	39	.	Intron (ENST00000409699.6/84465, intron 5 of 22)	15	66040233	66040332	100	1	100422905	ENST00000580794.1	-16076	ENSG00000263512	MIR4311	microRNA 4311
chr15	66267152	66267499	348	*	Peak_531	79	.	Distal Intergenic	15	65895079	66253747	358669	2	84465	ENST00000409699.6	-13405	ENSG00000157890	MEGF11	multiple EGF like domains 11
chr1	5663013	5663371	359	*	Peak_11748	34	.	Intron (ENST00000637702.1/ENST00000637702.1, intron 1 of 2)	1	5862672	5862741	70	2	100616421	ENST00000582517.1	199370	ENSG00000264101	MIR4689	microRNA 4689
chr15	66447696	66448089	394	*	Peak_4480	46	.	Intron (ENST00000307102.9/5604, intron 5 of 10)	15	66453454	66491343	37890	1	5604	ENST00000566326.1	-5365	ENSG00000169032	MAP2K1	mitogen-activated protein kinase kinase 1
chr15	66809299	66809672	374	*	Peak_9667	36	.	Exon (ENST00000604293.1/ENST00000604293.1, exon 1 of 1)	15	66711697	66717537	5841	1	4091	ENST00000558937.1	97602	ENSG00000137834	SMAD6	SMAD family member 6
chr15	66979567	66979796	230	*	Peak_10111	36	.	Distal Intergenic	15	66986368	66994187	7820	2	102723493	ENST00000560662.2	14391	NA	LOC102723493	uncharacterized LOC102723493
chr15	67350773	67351301	529	*	Peak_6061	43	.	Intron (ENST00000514049.5/64799, intron 3 of 16)	15	67357345	67360095	2751	1	64799	ENST00000559172.1	-6044	ENSG00000103599	IQCH	IQ motif containing H
chr15	67421752	67422033	282	*	Peak_15704	30	.	Intron (ENST00000514049.5/64799, intron 13 of 16)	15	67408077	67413538	5462	2	100506686	ENST00000558025.1	-8214	ENSG00000259673	IQCH-AS1	IQCH antisense RNA 1
chr15	67821845	67822225	381	*	Peak_5836	44	.	Promoter (1-2kb)	15	67823557	67834538	10982	1	390598	ENST00000554240.5	-1332	ENSG00000188779	SKOR1	SKI family transcriptional corepressor 1
chr15	67847939	67848340	402	*	Peak_6212	43	.	Intron (ENST00000558889.5/390598, intron 2 of 2)	15	67839939	67840045	107	2	101954271	ENST00000383898.1	-7894	ENSG00000207507	RNU6-9	RNA, U6 small nuclear 9
chr15	67891880	67892405	526	*	Peak_11185	34	.	Distal Intergenic	15	67839939	67840045	107	2	101954271	ENST00000383898.1	-51835	ENSG00000207507	RNU6-9	RNA, U6 small nuclear 9
chr15	68012818	68013135	318	*	Peak_9233	37	.	Distal Intergenic	15	68054179	68193846	139668	1	8554	ENST00000249636.10	-41044	ENSG00000033800	PIAS1	protein inhibitor of activated STAT 1
chr15	68234268	68234702	435	*	Peak_6299	43	.	Intron (ENST00000538696.5/54982, intron 1 of 6)	15	68206992	68229743	22752	2	54982	ENST00000249806.10	-4525	ENSG00000128973	CLN6	CLN6 transmembrane ER protein
chr15	68256261	68256588	328	*	Peak_9140	38	.	Promoter (<=1kb)	15	68208113	68256997	48885	2	54982	ENST00000635747.1	409	ENSG00000128973	CLN6	CLN6 transmembrane ER protein
chr15	68673320	68673591	272	*	Peak_2052	56	.	Intron (ENST00000566799.5/10391, intron 2 of 11)	15	68631988	68727803	95816	1	10391	ENST00000543950.2	41332	ENSG00000103647	CORO2B	coronin 2B
chr15	68855932	68856302	371	*	Peak_5757	44	.	Intron (ENST00000560188.1/246777, intron 1 of 1)	15	68787179	68820897	33719	2	8125	ENST00000495420.5	-35035	ENSG00000140350	ANP32A	acidic nuclear phosphoprotein 32 family member A
chr15	69885558	69886076	519	*	Peak_7655	40	.	Distal Intergenic	15	69835239	69842030	6792	1	414926	ENST00000558385.1	50319	ENSG00000245750	LINC00593	long intergenic non-protein coding RNA 593
chr15	70008579	70009505	927	*	Peak_146	124	.	Distal Intergenic	15	70049801	70051505	1705	2	7090	ENST00000559608.1	42000	ENSG00000140332	TLE3	TLE family member 3, transcriptional corepressor
chr15	70061806	70063025	1220	*	Peak_127	132	.	Promoter (2-3kb)	15	70058091	70058815	725	2	7090	ENST00000559826.1	-2991	ENSG00000140332	TLE3	TLE family member 3, transcriptional corepressor
chr15	70077593	70078001	409	*	Peak_2311	54	.	Promoter (1-2kb)	15	70079372	70079468	97	2	693214	ENST00000385230.1	1467	ENSG00000207965	MIR629	microRNA 629
chr15	70250446	70250951	506	*	Peak_749	72	.	Distal Intergenic	15	70047790	70098176	50387	2	7090	ENST00000558939.5	-152270	ENSG00000140332	TLE3	TLE family member 3, transcriptional corepressor
chr15	70307947	70308259	313	*	Peak_13700	32	.	Distal Intergenic	15	70503907	70505928	2022	2	105370880	ENST00000559752.1	197669	ENSG00000259473	LINC02205	long intergenic non-protein coding RNA 2205
chr15	74756850	74757150	301	*	Peak_1454	60	.	Distal Intergenic	15	74748844	74756202	7359	1	1544	ENST00000343932.4	8006	ENSG00000140505	CYP1A2	cytochrome P450 family 1 subfamily A member 2
chr15	75328789	75329157	369	*	Peak_7656	40	.	Distal Intergenic	15	75335891	75340273	4383	1	54939	ENST00000267935.12	-6734	ENSG00000140365	COMMD4	COMM domain containing 4
chr15	78523427	78523911	485	*	Peak_11752	34	.	Intron (ENST00000388988.8/123688, intron 3 of 4)	15	78513089	78537372	24284	1	123688	ENST00000563233.2	10338	ENSG00000188266	HYKK	hydroxylysine kinase
chr1	5788087	5788364	278	*	Peak_7659	40	.	Distal Intergenic	1	5862672	5862741	70	2	100616421	ENST00000582517.1	74377	ENSG00000264101	MIR4689	microRNA 4689
chr15	79533187	79533735	549	*	Peak_966	67	.	Distal Intergenic	15	79456096	79471144	15049	1	23251	ENST00000559272.1	77091	ENSG00000169330	MINAR1	membrane integral NOTCH2 associated receptor 1
chr15	79751235	79751717	483	*	Peak_18862	25	.	Exon (ENST00000493002.2/ENST00000493002.2, exon 1 of 1)	15	79889092	79896997	7906	2	10588	ENST00000560919.5	145280	ENSG00000136371	MTHFS	methenyltetrahydrofolate synthetase
chr15	80568644	80568967	324	*	Peak_2473	53	.	Intron (ENST00000303329.8/9915, intron 12 of 18)	15	80574066	80581305	7240	1	9915	ENST00000525505.1	-5099	ENSG00000172379	ARNT2	aryl hydrocarbon receptor nuclear translocator 2
chr1	58164633	58165254	622	*	Peak_2474	53	.	Intron (ENST00000485760.5/1600, intron 4 of 20)	1	57826071	57884085	58015	2	1600	ENST00000477280.1	-280548	ENSG00000173406	DAB1	DAB adaptor protein 1
chr15	83577756	83578142	387	*	Peak_7660	40	.	Intron (ENST00000427482.6/6457, intron 6 of 8)	15	83609270	83618642	9373	1	6457	ENST00000564054.1	-31128	ENSG00000140600	SH3GL3	SH3 domain containing GRB2 like 3, endophilin A3
chr15	84823516	84823776	261	*	Peak_19358	25	.	Intron (ENST00000258888.5/57538, intron 2 of 13)	15	84816680	84873482	56803	1	57538	ENST00000258888.5	6836	ENSG00000136383	ALPK3	alpha kinase 3
chr15	84857577	84858009	433	*	Peak_15329	30	.	Exon (ENST00000258888.5/57538, exon 6 of 14)	15	84863529	84868212	4684	1	57538	ENST00000558077.1	-5520	ENSG00000136383	ALPK3	alpha kinase 3
chr15	85103158	85103387	230	*	Peak_4488	46	.	Intron (ENST00000310298.8/5151, intron 12 of 22)	15	85099979	85100258	280	1	5151	ENST00000561105.1	3179	ENSG00000073417	PDE8A	phosphodiesterase 8A
chr1	58781825	58782705	881	*	Peak_1076	65	.	Promoter (1-2kb)	1	58780788	58784327	3540	2	3725	ENST00000371222.3	1622	ENSG00000177606	JUN	Jun proto-oncogene, AP-1 transcription factor subunit
chr1	58783057	58784189	1133	*	Peak_274	98	.	Promoter (<=1kb)	1	58780788	58784327	3540	2	3725	ENST00000371222.3	138	ENSG00000177606	JUN	Jun proto-oncogene, AP-1 transcription factor subunit
chr15	88201166	88201419	254	*	Peak_16436	28	.	Intron (ENST00000394480.6/4916, intron 3 of 18)	15	87916273	88205933	289661	2	4916	ENST00000542733.6	4514	ENSG00000140538	NTRK3	neurotrophic receptor tyrosine kinase 3
chr15	88724842	88725199	358	*	Peak_11760	34	.	Distal Intergenic	15	88652036	88655625	3590	1	3669	ENST00000546338.2	72806	ENSG00000172183	ISG20	interferon stimulated exonuclease gene 20
chr15	88978405	88978707	303	*	Peak_17927	26	.	Distal Intergenic	15	88898714	88913411	14698	2	4240	ENST00000268150.12	-64994	ENSG00000140545	MFGE8	milk fat globule-EGF factor 8 protein
chr15	89419157	89419468	312	*	Peak_1963	57	.	Distal Intergenic	15	89386596	89396240	9645	1	254559	ENST00000546186.2	32561	ENSG00000255571	MIR9-3HG	MIR9-3 host gene
chr15	89448357	89449087	731	*	Peak_10595	35	.	Distal Intergenic	15	89471445	89479430	7986	2	51458	ENST00000558360.1	30343	ENSG00000140519	RHCG	Rh family C glycoprotein
chr15	89948946	89949287	342	*	Peak_16438	28	.	Distal Intergenic	15	89895006	89912956	17951	2	348110	ENST00000357484.9	-35990	ENSG00000242498	ARPIN	actin related protein 2/3 complex inhibitor
chr15	90059305	90059589	285	*	Peak_992	67	.	Intron (ENST00000268154.8/374655, intron 1 of 4)	15	90068014	90074532	6519	1	374655	ENST00000558883.1	-8425	ENSG00000140548	ZNF710	zinc finger protein 710
chr15	90327921	90328194	274	*	Peak_3728	47	.	Distal Intergenic	15	90352245	90362847	10603	1	342132	ENST00000354377.7	-24051	ENSG00000196391	ZNF774	zinc finger protein 774
chr15	90608526	90608875	350	*	Peak_753	72	.	Intron (ENST00000420329.6/64784, intron 6 of 14)	15	90613657	90619790	6134	1	64784	ENST00000560047.1	-4782	ENSG00000140577	CRTC3	CREB regulated transcription coactivator 3
chr15	90944778	90945101	324	*	Peak_9106	38	.	Promoter (<=1kb)	15	90945036	90947138	2103	1	55898	ENST00000554481.1	0	ENSG00000140553	UNC45A	unc-45 myosin chaperone A
chr1	59382436	59382816	381	*	Peak_4490	46	.	Intron (ENST00000634606.1/55277, intron 4 of 16)	1	59393208	59626023	232816	1	55277	ENST00000475949.5	-10392	ENSG00000172456	FGGY	FGGY carbohydrate kinase domain containing
chr15	94750596	94751091	496	*	Peak_4491	46	.	Distal Intergenic	15	94855474	94856912	1439	1	440311	ENST00000565166.3	-104383	ENSG00000277654	LOC440311	NOP53 ribosome biogenesis factor pseudogene
chr1	59505212	59505509	298	*	Peak_4027	47	.	Intron (ENST00000634606.1/55277, intron 5 of 16)	1	59512316	59660423	148108	1	55277	ENST00000485720.1	-6807	ENSG00000172456	FGGY	FGGY carbohydrate kinase domain containing
chr15	95457592	95457867	276	*	Peak_1459	60	.	Intron (ENST00000650234.1/145820, intron 3 of 6)	15	95433095	95507847	74753	1	145820	ENST00000556053.1	24497	ENSG00000259134	LINC00924	long intergenic non-protein coding RNA 924
chr1	59581828	59582076	249	*	Peak_6966	41	.	Intron (ENST00000634606.1/55277, intron 7 of 16)	1	59553918	59762728	208811	1	55277	ENST00000371210.1	27910	ENSG00000172456	FGGY	FGGY carbohydrate kinase domain containing
chr15	96201287	96201626	340	*	Peak_10596	35	.	Intron (ENST00000619812.1/ENST00000619812.1, intron 1 of 3)	15	96153416	96223055	69640	2	644192	ENST00000559505.1	21429	ENSG00000247809	NR2F2-AS1	NR2F2 antisense RNA 1
chr15	98420440	98420713	274	*	Peak_1460	60	.	Distal Intergenic	15	98439631	98485897	46267	2	283777	ENST00000332908.6	65184	ENSG00000283597	FAM169B	family with sequence similarity 169 member B
chr1	5985318	5985592	275	*	Peak_3744	47	.	Intron (ENST00000478423.6/261734, intron 1 of 25)	1	5991466	6100175	108710	1	8514	ENST00000378111.5	-5874	ENSG00000069424	KCNAB2	potassium voltage-gated channel subfamily A regulatory beta subunit 2
chr15	99020998	99021238	241	*	Peak_7124	41	.	Intron (ENST00000559468.1/ENST00000559468.1, intron 2 of 3)	15	98968230	99007795	39566	2	145814	ENST00000535714.1	-13203	ENSG00000183571	PGPEP1L	pyroglutamyl-peptidase I like
chr16	1051156	1051629	474	*	Peak_9203	38	.	Distal Intergenic	16	1066376	1067236	861	2	146336	ENST00000569734.1	15607	ENSG00000261713	SSTR5-AS1	SSTR5 antisense RNA 1
chr16	1060784	1061086	303	*	Peak_8888	38	.	Distal Intergenic	16	1066376	1067236	861	2	146336	ENST00000569734.1	6150	ENSG00000261713	SSTR5-AS1	SSTR5 antisense RNA 1
chr16	11139739	11140083	345	*	Peak_2860	52	.	Intron (ENST00000409790.5/23274, intron 22 of 23)	16	11126010	11150317	24308	1	23274	ENST00000459723.1	13729	ENSG00000038532	CLEC16A	C-type lectin domain containing 16A
chr16	11413849	11414197	349	*	Peak_13105	34	.	Intron (ENST00000598234.6/ENST00000598234.6, intron 43 of 65)	16	11465260	11473174	7915	1	101927131	ENST00000572950.1	-51063	ENSG00000262999	LOC101927131	uncharacterized LOC101927131
chr16	11460121	11460422	302	*	Peak_13181	33	.	Intron (ENST00000598234.6/ENST00000598234.6, intron 26 of 65)	16	11465260	11473174	7915	1	101927131	ENST00000572950.1	-4838	ENSG00000262999	LOC101927131	uncharacterized LOC101927131
chr16	11674219	11674585	367	*	Peak_13451	33	.	Intron (ENST00000329565.5/8303, intron 1 of 1)	16	11668414	11679159	10746	1	8303	ENST00000329565.5	5805	ENSG00000184602	SNN	stannin
chr16	11874764	11875503	740	*	Peak_1339	60	.	Intron (ENST00000574364.1/ENST00000574364.1, intron 1 of 1)	16	11880225	11886904	6680	2	2935	ENST00000564790.5	11401	ENSG00000103342	GSPT1	G1 to S phase transition 1
chr16	1434117	1434482	366	*	Peak_6902	41	.	Promoter (<=1kb)	16	1434388	1435308	921	2	645811	ENST00000463299.2	826	ENSG00000197599	CCDC154	coiled-coil domain containing 154
chr1	61477035	61477425	391	*	Peak_11157	34	.	Distal Intergenic	1	61406672	61455874	49203	1	4774	ENST00000493627.1	70363	ENSG00000162599	NFIA	nuclear factor I A
chr16	15611038	15611543	506	*	Peak_13278	33	.	Promoter (<=1kb)	16	15611030	15611095	66	2	102465252	ENST00000614811.1	0	ENSG00000284184	MIR6506	microRNA 6506
chr16	15666698	15666979	282	*	Peak_9352	37	.	Intron (ENST00000396355.5/54820, intron 3 of 9)	16	15672663	15687468	14806	1	54820	ENST00000574163.1	-5684	ENSG00000072864	NDE1	nudE neurodevelopment protein 1
chr1	61611835	61612748	914	*	Peak_9010	38	.	Distal Intergenic	1	61654194	61654908	715	1	414927	ENST00000416440.2	-41446	NA	MGC34796	sepiapterin reductase (7,8-dihydrobiopterin:NADP+ oxidoreductase) pseudogene
chr16	1655046	1655375	330	*	Peak_5510	45	.	3' UTR	16	1662462	1668063	5602	1	57585	ENST00000492778.5	-7087	ENSG00000007545	CRAMP1	cramped chromatin regulator homolog 1
chr16	19721801	19722080	280	*	Peak_10600	35	.	Intron (ENST00000568126.5/124152, intron 2 of 5)	16	19718416	19734033	15618	1	124152	ENST00000566312.1	3385	ENSG00000174628	IQCK	IQ motif containing K
chr16	19838412	19838895	484	*	Peak_16445	28	.	Intron (ENST00000308214.13/124152, intron 7 of 7)	16	19827064	19857585	30522	1	124152	ENST00000568061.1	11348	ENSG00000174628	IQCK	IQ motif containing K
chr16	21575231	21575533	303	*	Peak_19926	23	.	Distal Intergenic	16	21597218	21598007	790	1	51108	ENST00000563026.1	-21685	ENSG00000197006	METTL9	methyltransferase like 9
chr1	62217796	62218288	493	*	Peak_14496	31	.	Distal Intergenic	1	62194831	62212328	17498	1	54596	ENST00000498273.1	22965	ENSG00000240563	L1TD1	LINE1 type transposase domain containing 1
chr1	62220499	62220840	342	*	Peak_6903	41	.	Distal Intergenic	1	62194831	62212328	17498	1	54596	ENST00000498273.1	25668	ENSG00000240563	L1TD1	LINE1 type transposase domain containing 1
chr16	22607495	22607733	239	*	Peak_4032	47	.	Distal Intergenic	16	22546964	22576682	29719	1	653786	ENST00000548889.1	60531	ENSG00000257838	OTOAP1	OTOA pseudogene 1
chr1	62280192	62280550	359	*	Peak_3034	51	.	Intron (ENST00000371153.8/163782, intron 2 of 9)	1	62237544	62272791	35248	2	163782	ENST00000371150.5	-7401	ENSG00000132854	KANK4	KN motif and ankyrin repeat domains 4
chr16	23295830	23296330	501	*	Peak_4495	46	.	Intron (ENST00000569789.1/6338, intron 2 of 3)	16	23302270	23381299	79030	1	6338	ENST00000343070.6	-5940	ENSG00000168447	SCNN1B	sodium channel epithelial 1 beta subunit
chr16	2450539	2450894	356	*	Peak_5354	46	.	Intron (ENST00000293968.11/899, intron 12 of 15)	16	2445392	2445457	66	1	102465459	ENST00000637302.1	5147	ENSG00000283180	MIR6767	microRNA 6767
chr16	24577851	24578178	328	*	Peak_20482	20	.	Distal Intergenic	16	24563280	24567370	4091	1	5930	ENST00000570185.1	14571	ENSG00000122257	RBBP6	RB binding protein 6, ubiquitin ligase
chr16	25217234	25217511	278	*	Peak_4497	46	.	Promoter (<=1kb)	16	25216921	25228940	12020	1	343	ENST00000219660.5	313	ENSG00000103375	AQP8	aquaporin 8
chr16	2783263	2783531	269	*	Peak_6524	42	.	Downstream (<1kb)	16	2784944	2786605	1662	2	260429	ENST00000571674.1	3074	ENSG00000103355	PRSS33	serine protease 33
chr16	2808022	2808584	563	*	Peak_1899	58	.	Distal Intergenic	16	2817180	2821719	4540	1	10942	ENST00000450020.7	-8596	ENSG00000007038	PRSS21	serine protease 21
chr16	28218407	28218764	358	*	Peak_5867	44	.	Distal Intergenic	16	28180941	28211920	30980	2	23214	ENST00000566073.1	-6487	ENSG00000169180	XPO6	exportin 6
chr16	28512782	28513056	275	*	Peak_7669	40	.	Promoter (<=1kb)	16	28501974	28512051	10078	2	246778	ENST00000568075.1	-731	ENSG00000197272	IL27	interleukin 27
chr1	62858697	62858926	230	*	Peak_17571	27	.	Intron (ENST00000317868.8/84938, intron 10 of 10)	1	62821183	62835529	14347	1	84938	ENST00000414558.2	37514	ENSG00000125703	ATG4C	autophagy related 4C cysteine peptidase
chr1	62961786	62962452	667	*	Peak_4498	46	.	Distal Intergenic	1	63000497	63010925	10429	2	105378769	ENST00000420285.5	48473	ENSG00000229537	LINC01739	long intergenic non-protein coding RNA 1739
chr1	63011047	63011386	340	*	Peak_11778	34	.	Promoter (<=1kb)	1	62975751	63011197	35447	2	105378769	ENST00000641890.1	0	ENSG00000229537	LINC01739	long intergenic non-protein coding RNA 1739
chr16	30425696	30425938	243	*	Peak_9228	37	.	Intron (ENST00000566625.2/51333, intron 2 of 2)	16	30423914	30429289	5376	2	79077	ENST00000568434.1	3351	ENSG00000179958	DCTPP1	dCTP pyrophosphatase 1
chr1	63075120	63075510	391	*	Peak_5690	44	.	Distal Intergenic	1	63000497	63012471	11975	2	105378769	ENST00000420659.1	-62649	ENSG00000229537	LINC01739	long intergenic non-protein coding RNA 1739
chr16	31176117	31176364	248	*	Peak_5438	45	.	Distal Intergenic	16	31180110	31194871	14762	1	2521	ENST00000254108.11	-3746	ENSG00000089280	FUS	FUS RNA binding protein
chr1	63161141	63161376	236	*	Peak_4500	46	.	Promoter (<=1kb)	1	63159087	63160410	1324	2	199899	ENST00000432537.2	-731	ENSG00000224209	LINC00466	long intergenic non-protein coding RNA 466
chr16	3248845	3249263	419	*	Peak_17931	26	.	Promoter (<=1kb)	16	3246410	3247967	1558	2	4210	ENST00000539154.1	-878	ENSG00000103313	MEFV	MEFV innate immuity regulator, pyrin
chr1	63316643	63317033	391	*	Peak_13568	32	.	Promoter (<=1kb)	1	63159087	63317222	158136	2	199899	ENST00000635458.1	189	ENSG00000224209	LINC00466	long intergenic non-protein coding RNA 466
chr1	63319470	63319821	352	*	Peak_7023	41	.	Promoter (1-2kb)	1	63320884	63321529	646	2	100996301	ENST00000426393.5	1708	ENSG00000230798	FOXD3-AS1	FOXD3 antisense RNA 1
chr1	63330216	63330707	492	*	Peak_10602	35	.	Distal Intergenic	1	63326925	63326984	60	2	102464823	ENST00000615405.1	-3232	ENSG00000275836	MIR6068	microRNA 6068
chr16	3365441	3366018	578	*	Peak_14497	31	.	Promoter (<=1kb)	16	3365112	3479550	114439	1	79903	ENST00000575785.2	329	ENSG00000122390	NAA60	N(alpha)-acetyltransferase 60, NatF catalytic subunit
chr16	3472577	3472966	390	*	Peak_2980	51	.	Intron (ENST00000575785.2/79903, intron 3 of 4)	16	3479580	3483799	4220	1	79903	ENST00000571798.1	-6614	ENSG00000122390	NAA60	N(alpha)-acetyltransferase 60, NatF catalytic subunit
chr16	3492754	3493026	273	*	Peak_2476	53	.	Promoter (2-3kb)	16	3493484	3495424	1941	2	646174	ENST00000437192.7	2398	ENSG00000215131	C16orf90	chromosome 16 open reading frame 90
chr16	3494305	3494540	236	*	Peak_1975	57	.	Promoter (<=1kb)	16	3493484	3495424	1941	2	646174	ENST00000437192.7	884	ENSG00000215131	C16orf90	chromosome 16 open reading frame 90
chr16	3558804	3559084	281	*	Peak_16450	28	.	Promoter (1-2kb)	16	3548135	3556994	8860	2	197358	ENST00000618137.1	-1810	ENSG00000167984	NLRC3	NLR family CARD domain containing 3
chr16	3591215	3591593	379	*	Peak_13989	32	.	Exon (ENST00000294008.3/84464, exon 12 of 15)	16	3539038	3577400	38363	2	197358	ENST00000615877.4	-13815	ENSG00000167984	NLRC3	NLR family CARD domain containing 3
chr1	63849538	63849811	274	*	Peak_9602	37	.	Intron (ENST00000371080.5/4919, intron 1 of 6)	1	63775290	64140364	365075	1	4919	ENST00000482426.1	74248	ENSG00000185483	ROR1	receptor tyrosine kinase like orphan receptor 1
chr1	63884895	63885199	305	*	Peak_11784	34	.	Intron (ENST00000371080.5/4919, intron 1 of 6)	1	63775290	64140364	365075	1	4919	ENST00000482426.1	109605	ENSG00000185483	ROR1	receptor tyrosine kinase like orphan receptor 1
chr1	63886779	63887181	403	*	Peak_1461	60	.	Intron (ENST00000371080.5/4919, intron 1 of 6)	1	63775290	64140364	365075	1	4919	ENST00000482426.1	111489	ENSG00000185483	ROR1	receptor tyrosine kinase like orphan receptor 1
chr16	3921017	3921342	326	*	Peak_13343	33	.	Distal Intergenic	16	3947609	3950444	2836	2	102724927	ENST00000576810.1	29102	ENSG00000262185	LOC102724927	uncharacterized LOC102724927
chr1	63990191	63990512	322	*	Peak_791	70	.	Intron (ENST00000371080.5/4919, intron 1 of 6)	1	64009303	64181492	172190	1	4919	ENST00000545203.2	-18791	ENSG00000185483	ROR1	receptor tyrosine kinase like orphan receptor 1
chr16	406287	406539	253	*	Peak_5521	45	.	Promoter (<=1kb)	16	406895	412487	5593	1	26063	ENST00000461947.5	-356	ENSG00000242612	DECR2	2,4-dienoyl-CoA reductase 2
chr16	413364	413731	368	*	Peak_3891	47	.	Distal Intergenic	16	410112	411050	939	1	26063	ENST00000469922.1	3252	ENSG00000242612	DECR2	2,4-dienoyl-CoA reductase 2
chr16	4194844	4195192	349	*	Peak_18359	26	.	Intron (ENST00000572111.1/6345, intron 6 of 6)	16	4191810	4239743	47934	2	6345	ENST00000537996.1	44551	ENSG00000185739	SRL	sarcalumenin
chr16	4582560	4583150	591	*	Peak_14498	31	.	Intron (ENST00000444310.4/342346, intron 7 of 15)	16	4556490	4600714	44225	1	342346	ENST00000444310.4	26070	ENSG00000205832	C16orf96	chromosome 16 open reading frame 96
chr1	64637391	64637728	338	*	Peak_6905	41	.	Intron (ENST00000290039.5/57685, intron 7 of 26)	1	64664200	64666140	1941	1	57685	ENST00000486580.1	-26472	ENSG00000158966	CACHD1	cache domain containing 1
chr16	47296922	47297453	532	*	Peak_1462	60	.	Intron (ENST00000568047.5/81533, intron 2 of 9)	16	47155301	47311950	156650	2	81533	ENST00000537184.6	14497	ENSG00000129636	ITFG1	integrin alpha FG-GAP repeat containing 1
chr16	47724711	47725192	482	*	Peak_18871	25	.	Promoter (<=1kb)	16	47724568	47863599	139032	1	101927132	ENST00000565451.5	143	ENSG00000261231	LINC02133	long intergenic non-protein coding RNA 2133
chr16	47943120	47943569	450	*	Peak_17934	26	.	Distal Intergenic	16	47965672	47971687	6016	1	105371238	ENST00000562980.1	-22103	NA	LINC02134	long intergenic non-protein coding RNA 2134
chr16	48007722	48007956	235	*	Peak_2198	55	.	Distal Intergenic	16	47965672	47971687	6016	1	105371238	ENST00000562980.1	42050	NA	LINC02134	long intergenic non-protein coding RNA 2134
chr16	48009212	48009601	390	*	Peak_2389	53	.	Distal Intergenic	16	47965672	47971687	6016	1	105371238	ENST00000562980.1	43540	NA	LINC02134	long intergenic non-protein coding RNA 2134
chr1	64850182	64850701	520	*	Peak_833	70	.	Promoter (2-3kb)	1	64841474	64848107	6634	2	3716	ENST00000465376.5	-2075	ENSG00000162434	JAK1	Janus kinase 1
chr16	48869070	48869309	240	*	Peak_4502	46	.	Distal Intergenic	16	48546097	48620148	74052	2	9683	ENST00000564124.5	-248922	ENSG00000102921	N4BP1	NEDD4 binding protein 1
chr16	48932017	48932515	499	*	Peak_2250	54	.	Distal Intergenic	16	48546097	48620148	74052	2	9683	ENST00000564124.5	-311869	ENSG00000102921	N4BP1	NEDD4 binding protein 1
chr16	49113685	49114381	697	*	Peak_1463	60	.	Distal Intergenic	16	49279290	49281482	2193	2	869	ENST00000564786.1	167101	ENSG00000102924	CBLN1	cerebellin 1 precursor
chr16	49347115	49347482	368	*	Peak_20712	20	.	Intron (ENST00000623424.2/ENST00000623424.2, intron 4 of 4)	16	49373823	49399431	25609	1	123970	ENST00000299191.3	-26341	ENSG00000166152	C16orf78	chromosome 16 open reading frame 78
chr16	49524515	49524744	230	*	Peak_4504	46	.	Intron (ENST00000561648.5/23090, intron 7 of 8)	16	49517762	49518601	840	2	1596	ENST00000569937.2	-5914	ENSG00000260089	ADAM3B	ADAM metallopeptidase domain 3B (pseudogene)
chr16	49666543	49667110	568	*	Peak_601	75	.	Promoter (2-3kb)	16	49490787	49664225	173439	2	23090	ENST00000535559.5	-2318	ENSG00000102935	ZNF423	zinc finger protein 423
chr16	49694619	49695160	542	*	Peak_357	90	.	Intron (ENST00000561648.5/23090, intron 4 of 8)	16	49490787	49664225	173439	2	23090	ENST00000535559.5	-30394	ENSG00000102935	ZNF423	zinc finger protein 423
chr16	49910992	49911223	232	*	Peak_7673	40	.	Distal Intergenic	16	49491275	49857919	366645	2	23090	ENST00000562520.1	-53073	ENSG00000102935	ZNF423	zinc finger protein 423
chr16	50558279	50558521	243	*	Peak_2013	57	.	Exon (ENST00000623140.1/ENST00000623140.1, exon 1 of 1)	16	50548396	50616108	67713	1	85407	ENST00000564336.1	9883	ENSG00000140807	NKD1	NKD inhibitor of WNT signaling pathway 1
chr16	50625112	50625461	350	*	Peak_3380	49	.	Promoter (<=1kb)	16	50625225	50633222	7998	1	85407	ENST00000566396.1	0	ENSG00000140807	NKD1	NKD inhibitor of WNT signaling pathway 1
chr16	50710570	50710886	317	*	Peak_15339	30	.	Promoter (1-2kb)	16	50712194	50723374	11181	1	64127	ENST00000524712.5	-1308	ENSG00000167207	NOD2	nucleotide binding oligomerization domain containing 2
chr1	65134801	65135395	595	*	Peak_17935	26	.	Distal Intergenic	1	65147549	65226092	78544	1	205	ENST00000497030.5	-12154	ENSG00000162433	AK4	adenylate kinase 4
chr16	51526455	51526684	230	*	Peak_4505	46	.	Distal Intergenic	16	51762519	51772646	10128	1	101927364	ENST00000569993.5	-235835	ENSG00000260057	LINC01571	long intergenic non-protein coding RNA 1571
chr1	65153186	65153429	244	*	Peak_7000	41	.	Intron (ENST00000497030.5/205, intron 2 of 5)	1	65149002	65226439	77438	1	205	ENST00000474968.5	4184	ENSG00000162433	AK4	adenylate kinase 4
chr1	65193708	65194090	383	*	Peak_8412	39	.	Intron (ENST00000497030.5/205, intron 3 of 5)	1	65165932	65226429	60498	1	205	ENST00000479060.1	27776	ENSG00000162433	AK4	adenylate kinase 4
chr16	53353738	53354027	290	*	Peak_4506	46	.	Distal Intergenic	16	53366914	53371129	4216	2	643802	ENST00000565421.1	17102	ENSG00000260078	LOC643802	u3 small nucleolar ribonucleoprotein protein MPP10-like
chr16	54284067	54284410	344	*	Peak_7128	41	.	Promoter (1-2kb)	16	54283436	54285855	2420	2	79191	ENST00000558054.1	1445	ENSG00000177508	IRX3	iroquois homeobox 3
chr1	65463039	65463316	278	*	Peak_17939	26	.	Intron (ENST00000371059.7/3953, intron 2 of 19)	1	65420716	65436007	15292	1	54741	ENST00000613538.1	42323	ENSG00000213625	LEPROT	leptin receptor overlapping transcript
chr16	54863787	54864147	361	*	Peak_11792	34	.	Intron (ENST00000637011.1/101927480, intron 1 of 5)	16	54847247	54874168	26922	2	101927480	ENST00000637011.1	10021	ENSG00000245694	LOC101927480	uncharacterized LOC101927480
chr16	55004075	55004372	298	*	Peak_4509	46	.	Distal Intergenic	16	54932072	54934069	1998	1	10265	ENST00000558597.1	72003	ENSG00000176842	IRX5	iroquois homeobox 5
chr16	55041497	55041810	314	*	Peak_13860	32	.	Distal Intergenic	16	54932072	54934069	1998	1	10265	ENST00000558597.1	109425	ENSG00000176842	IRX5	iroquois homeobox 5
chr16	55826446	55826972	527	*	Peak_2478	53	.	Promoter (1-2kb)	16	55821429	55828175	6747	2	1066	ENST00000566555.1	1203	ENSG00000198848	CES1	carboxylesterase 1
chr16	56585606	56585898	293	*	Peak_10124	36	.	Distal Intergenic	16	56589074	56591075	2002	1	4504	ENST00000561640.5	-3176	ENSG00000087250	MT3	metallothionein 3
chr16	57004514	57004866	353	*	Peak_8845	38	.	Promoter (<=1kb)	16	57004486	57020769	16284	1	84166	ENST00000538059.5	28	ENSG00000140853	NLRC5	NLR family CARD domain containing 5
chr16	57022122	57022544	423	*	Peak_17108	28	.	Promoter (1-2kb)	16	57020713	57083519	62807	1	84166	ENST00000539144.5	1409	ENSG00000140853	NLRC5	NLR family CARD domain containing 5
chr1	65709853	65710142	290	*	Peak_10280	35	.	Intron (ENST00000646875.1/ENST00000646875.1, intron 1 of 2)	1	65792514	66374278	581765	1	5142	ENST00000329654.8	-82372	ENSG00000184588	PDE4B	phosphodiesterase 4B
chr1	65724738	65725082	345	*	Peak_6400	42	.	Distal Intergenic	1	65792514	66374278	581765	1	5142	ENST00000329654.8	-67432	ENSG00000184588	PDE4B	phosphodiesterase 4B
chr16	57330561	57330885	325	*	Peak_1465	60	.	Distal Intergenic	16	57358772	57366190	7419	1	6367	ENST00000219235.4	-27887	ENSG00000102962	CCL22	C-C motif chemokine ligand 22
chr1	65766044	65766286	243	*	Peak_4510	46	.	Distal Intergenic	1	65792514	66374278	581765	1	5142	ENST00000329654.8	-26228	ENSG00000184588	PDE4B	phosphodiesterase 4B
chr16	57770077	57770356	280	*	Peak_3839	47	.	Promoter (1-2kb)	16	57772289	57772352	64	2	102465463	ENST00000616699.1	1996	ENSG00000274816	MIR6772	microRNA 6772
chr16	57912229	57912466	238	*	Peak_3347	49	.	Promoter (<=1kb)	16	57897856	57911901	14046	2	1258	ENST00000569643.1	-328	ENSG00000070729	CNGB1	cyclic nucleotide gated channel beta 1
chr16	57919971	57920342	372	*	Peak_993	67	.	Intron (ENST00000251102.12/1258, intron 19 of 32)	16	57897856	57911901	14046	2	1258	ENST00000569643.1	-8070	ENSG00000070729	CNGB1	cyclic nucleotide gated channel beta 1
chr16	58034080	58034367	288	*	Peak_14142	32	.	Intron (ENST00000219271.3/4324, intron 1 of 9)	16	58040165	58040867	703	1	4324	ENST00000570065.1	-5798	ENSG00000102996	MMP15	matrix metallopeptidase 15
chr1	65803574	65803803	230	*	Peak_5765	44	.	Intron (ENST00000329654.8/5142, intron 1 of 16)	1	65793181	66373504	580324	1	5142	ENST00000341517.8	10393	ENSG00000184588	PDE4B	phosphodiesterase 4B
chr16	58073552	58073892	341	*	Peak_1879	58	.	Distal Intergenic	16	58040165	58040867	703	1	4324	ENST00000570065.1	33387	ENSG00000102996	MMP15	matrix metallopeptidase 15
chr16	58404891	58405140	250	*	Peak_4033	47	.	3' UTR	16	58392698	58393673	976	1	64785	ENST00000567909.1	12193	ENSG00000181938	GINS3	GINS complex subunit 3
chr16	58462692	58463412	721	*	Peak_1019	66	.	Promoter (<=1kb)	16	58462846	58504649	41804	1	65009	ENST00000568999.5	0	ENSG00000103034	NDRG4	NDRG family member 4
chr16	58508444	58509054	611	*	Peak_15856	29	.	Promoter (<=1kb)	16	58509149	58513415	4267	1	65009	ENST00000566265.1	-95	ENSG00000103034	NDRG4	NDRG family member 4
chr16	58644221	58645184	964	*	Peak_1233	62	.	Distal Intergenic	16	58519951	58629886	109936	2	23019	ENST00000317147.9	-14335	ENSG00000125107	CNOT1	CCR4-NOT transcription complex subunit 1
chr16	58853826	58854215	390	*	Peak_4511	46	.	Intron (ENST00000568134.5/ENST00000568134.5, intron 3 of 3)	16	58707131	58734357	27227	2	2806	ENST00000245206.9	-119469	ENSG00000125166	GOT2	glutamic-oxaloacetic transaminase 2
chr1	65929902	65930137	236	*	Peak_5766	44	.	Intron (ENST00000329654.8/5142, intron 3 of 16)	1	65992422	66374573	382152	1	5142	ENST00000423207.6	-62285	ENSG00000184588	PDE4B	phosphodiesterase 4B
chr1	65956257	65956668	412	*	Peak_9603	37	.	Intron (ENST00000329654.8/5142, intron 3 of 16)	1	65992422	66374573	382152	1	5142	ENST00000423207.6	-35754	ENSG00000184588	PDE4B	phosphodiesterase 4B
chr1	66212690	66212920	231	*	Peak_5767	44	.	Intron (ENST00000329654.8/5142, intron 3 of 16)	1	66257365	66267509	10145	1	5142	ENST00000371048.7	-44445	ENSG00000184588	PDE4B	phosphodiesterase 4B
chr1	66217413	66217822	410	*	Peak_2023	57	.	Intron (ENST00000329654.8/5142, intron 3 of 16)	1	66257365	66267509	10145	1	5142	ENST00000371048.7	-39543	ENSG00000184588	PDE4B	phosphodiesterase 4B
chr1	66426139	66426493	355	*	Peak_6752	41	.	Distal Intergenic	1	66367494	66368157	664	1	5142	ENST00000483863.2	58645	ENSG00000184588	PDE4B	phosphodiesterase 4B
chr16	65835873	65836104	232	*	Peak_7679	40	.	Distal Intergenic	16	65284499	65576300	291802	2	283867	ENST00000569736.5	-259573	ENSG00000261742	LINC00922	long intergenic non-protein coding RNA 922
chr1	66647005	66647234	230	*	Peak_8329	40	.	Intron (ENST00000237247.10/84251, intron 8 of 26)	1	66628440	66628517	78	1	100422871	ENST00000584034.3	18565	ENSG00000264720	MIR3117	microRNA 3117
chr1	66647923	66648152	230	*	Peak_5639	45	.	Intron (ENST00000237247.10/84251, intron 8 of 26)	1	66628440	66628517	78	1	100422871	ENST00000584034.3	19483	ENSG00000264720	MIR3117	microRNA 3117
chr16	66786525	66786822	298	*	Peak_847	69	.	Intron (ENST00000558713.6/283847, intron 5 of 17)	16	66767428	66801026	33599	2	283847	ENST00000561333.1	14204	ENSG00000249961	TERB1	telomere repeat binding bouquet formation protein 1
chr16	66819902	66820499	598	*	Peak_3893	47	.	Intron (ENST00000359087.8/8883, intron 7 of 19)	16	66813129	66816716	3588	2	8883	ENST00000567521.1	-3186	ENSG00000159593	NAE1	NEDD8 activating enzyme E1 subunit 1
chr16	67886661	67886916	256	*	Peak_19879	24	.	Promoter (1-2kb)	16	67885569	67886368	800	1	123904	ENST00000576147.1	1092	ENSG00000188038	NRN1L	neuritin 1 like
chr1	66804312	66804544	233	*	Peak_6753	41	.	Distal Intergenic	1	66797741	66801256	3516	2	10022	ENST00000304526.2	-3056	ENSG00000172410	INSL5	insulin like 5
chr16	68249387	68249640	254	*	Peak_544	78	.	Promoter (1-2kb)	16	68248287	68249424	1138	1	23659	ENST00000568599.1	1100	ENSG00000103066	PLA2G15	phospholipase A2 group XV
chr16	69126461	69126762	302	*	Peak_7080	41	.	Intron (ENST00000448552.6/54921, intron 1 of 3)	16	69131291	69139903	8613	1	84916	ENST00000563299.5	-4529	ENSG00000141076	UTP4	UTP4 small subunit processome component
chr16	69496827	69497106	280	*	Peak_3771	47	.	Distal Intergenic	16	69565094	69704650	139557	1	10725	ENST00000426654.6	-67988	ENSG00000102908	NFAT5	nuclear factor of activated T cells 5
chr16	69688810	69689076	267	*	Peak_13124	34	.	Promoter (1-2kb)	16	69690544	69692053	1510	1	10725	ENST00000568832.1	-1468	ENSG00000102908	NFAT5	nuclear factor of activated T cells 5
chr16	69789382	69789812	431	*	Peak_17941	26	.	Intron (ENST00000359154.6/11060, intron 2 of 23)	16	69798865	69940178	141314	1	11060	ENST00000544162.5	-9053	ENSG00000198373	WWP2	WW domain containing E3 ubiquitin protein ligase 2
chr16	70156790	70157060	271	*	Peak_2914	52	.	3' UTR	16	70145804	70153565	7762	1	55066	ENST00000567896.1	10986	ENSG00000090857	PDPR	pyruvate dehydrogenase phosphatase regulatory subunit
chr16	70162629	70163085	457	*	Peak_2070	56	.	Intron (ENST00000566989.1/400541, intron 1 of 2)	16	70173322	70182456	9135	1	283971	ENST00000562923.5	-10237	ENSG00000157335	CLEC18C	C-type lectin domain family 18 member C
chr16	70567634	70568522	889	*	Peak_9948	36	.	Promoter (1-2kb)	16	70569915	70572299	2385	1	23450	ENST00000565990.2	-1393	ENSG00000189091	SF3B3	splicing factor 3b subunit 3
chr1	67113158	67113613	456	*	Peak_742	72	.	Intron (ENST00000371007.6/400757, intron 5 of 7)	1	67092176	67127261	35086	2	400757	ENST00000371006.5	13648	ENSG00000203963	C1orf141	chromosome 1 open reading frame 141
chr16	71239253	71239498	246	*	Peak_4514	46	.	Distal Intergenic	16	71031411	71230722	199312	2	54768	ENST00000538248.5	-8531	ENSG00000157423	HYDIN	HYDIN axonemal central pair apparatus protein
chr1	67131824	67132629	806	*	Peak_6659	42	.	Promoter (2-3kb)	1	67092395	67134970	42576	2	400757	ENST00000371004.6	2341	ENSG00000203963	C1orf141	chromosome 1 open reading frame 141
chr16	71516209	71516505	297	*	Peak_9847	36	.	Promoter (2-3kb)	16	71513863	71517849	3987	1	105371335	ENST00000569271.1	2346	ENSG00000260520	LOC105371335	uncharacterized LOC105371335
chr1	6716319	6716548	230	*	Peak_3001	51	.	Distal Intergenic	1	6724637	6727408	2772	1	100505887	ENST00000432429.5	-8089	NA	LINC01672	long intergenic non-protein coding RNA 1672
chr1	67168262	67168691	430	*	Peak_9484	37	.	Promoter (1-2kb)	1	67166400	67259979	93580	1	149233	ENST00000347310.9	1862	ENSG00000162594	IL23R	interleukin 23 receptor
chr16	71924384	71924821	438	*	Peak_13603	32	.	Promoter (<=1kb)	16	71924408	71927838	3431	1	9798	ENST00000541180.1	0	ENSG00000182149	IST1	IST1 factor associated with ESCRT-III
chr16	71942545	71942812	268	*	Peak_4036	47	.	Exon (ENST00000620267.1/342372, exon 24 of 30)	16	71924408	71927838	3431	1	9798	ENST00000541180.1	18137	ENSG00000182149	IST1	IST1 factor associated with ESCRT-III
chr1	67232369	67233181	813	*	Peak_7130	41	.	Promoter (<=1kb)	1	67093559	67231853	138295	2	400757	ENST00000448166.6	-516	ENSG00000203963	C1orf141	chromosome 1 open reading frame 141
chr1	67280382	67280804	423	*	Peak_2479	53	.	Distal Intergenic	1	67307364	67396900	89537	1	3595	ENST00000262345.5	-26560	ENSG00000081985	IL12RB2	interleukin 12 receptor subunit beta 2
chr16	73195383	73195888	506	*	Peak_6756	41	.	Intron (ENST00000641206.2/463, intron 5 of 17)	16	73126637	73144447	17811	2	388289	ENST00000358463.2	-50936	ENSG00000140836	C16orf47	chromosome 16 open reading frame 47
chr1	67381120	67381499	380	*	Peak_15342	30	.	Promoter (1-2kb)	1	67379928	67395763	15836	1	3595	ENST00000465396.1	1192	ENSG00000081985	IL12RB2	interleukin 12 receptor subunit beta 2
chr16	74313919	74314211	293	*	Peak_11135	35	.	Intron (ENST00000564455.1/ENST00000564455.1, intron 1 of 1)	16	74303989	74305606	1618	1	5713	ENST00000563150.1	9930	ENSG00000103035	PSMD7	proteasome 26S subunit, non-ATPase 7
chr16	74372631	74373079	449	*	Peak_1779	59	.	Distal Intergenic	16	74337944	74368240	30297	2	283922	ENST00000429810.2	-4391	ENSG00000214331	LOC283922	pyruvate dehydrogenase phosphatase regulatory subunit pseudogene
chr16	74373291	74373613	323	*	Peak_8645	39	.	Distal Intergenic	16	74377878	74392080	14203	1	440348	ENST00000429990.1	-4265	ENSG00000196436	NPIPB15	nuclear pore complex interacting protein family member B15
chr1	67460856	67461292	437	*	Peak_18403	26	.	Distal Intergenic	1	67407810	67430415	22606	2	26135	ENST00000370994.8	-30441	ENSG00000142864	SERBP1	SERPINE1 mRNA binding protein 1
chr1	67472933	67473192	260	*	Peak_10952	35	.	Distal Intergenic	1	67407810	67430415	22606	2	26135	ENST00000370994.8	-42518	ENSG00000142864	SERBP1	SERPINE1 mRNA binding protein 1
chr16	74795926	74796254	329	*	Peak_8420	39	.	Distal Intergenic	16	74713598	74774831	61234	2	79152	ENST00000567683.5	-21095	ENSG00000103089	FA2H	fatty acid 2-hydroxylase
chr16	74932771	74933101	331	*	Peak_1340	60	.	Promoter (1-2kb)	16	74909747	74930792	21046	2	79726	ENST00000569549.5	-1979	ENSG00000103091	WDR59	WD repeat domain 59
chr16	75204387	75204802	416	*	Peak_711	73	.	Promoter (<=1kb)	16	75204103	75205795	1693	2	440387	ENST00000562106.5	993	ENSG00000168928	CTRB2	chymotrypsinogen B2
chr16	83720605	83720921	317	*	Peak_4517	46	.	Intron (ENST00000567109.5/1012, intron 10 of 13)	16	83654820	83670881	16062	1	1012	ENST00000562307.1	65785	ENSG00000140945	CDH13	cadherin 13
chr16	84853790	84854277	488	*	Peak_11806	34	.	Intron (ENST00000262424.9/83716, intron 5 of 14)	16	84849217	84866993	17777	1	83716	ENST00000566789.1	4573	ENSG00000103196	CRISPLD2	cysteine rich secretory protein LCCL domain containing 2
chr16	84949669	84949972	304	*	Peak_2251	54	.	Distal Intergenic	16	84976104	84977281	1178	2	55625	ENST00000564526.1	27309	ENSG00000153786	ZDHHC7	zinc finger DHHC-type containing 7
chr16	85048957	85049301	345	*	Peak_9949	36	.	Intron (ENST00000258180.7/9764, intron 1 of 12)	16	85063212	85094230	31019	1	9764	ENST00000566428.5	-13911	ENSG00000135709	KIAA0513	KIAA0513
chr16	854023	854558	536	*	Peak_4038	47	.	3' UTR	16	854500	868968	14469	2	64788	ENST00000565276.5	14410	ENSG00000103227	LMF1	lipase maturation factor 1
chr1	68578371	68578718	348	*	Peak_7680	40	.	Distal Intergenic	1	68474152	68497221	23070	2	55635	ENST00000370966.9	-81150	ENSG00000024526	DEPDC1	DEP domain containing 1
chr16	85815932	85816161	230	*	Peak_11807	34	.	Exon (ENST00000484096.1/ENST00000484096.1, exon 1 of 1)	16	85805069	85807031	1963	1	1327	ENST00000562929.1	10863	ENSG00000131143	COX4I1	cytochrome c oxidase subunit 4I1
chr16	85975193	85975652	460	*	Peak_7681	40	.	Intron (ENST00000645754.1/ENST00000645754.1, intron 2 of 2)	16	85918347	85918416	70	1	102466732	ENST00000614651.1	56846	ENSG00000274134	MIR6774	microRNA 6774
chr1	68860089	68860514	426	*	Peak_15116	30	.	Intron (ENST00000643361.1/ENST00000643361.1, intron 2 of 6)	1	69055898	69185003	129106	1	105378785	ENST00000425517.1	-195384	ENSG00000223883	LINC01707	long intergenic non-protein coding RNA 1707
chr16	88934241	88934630	390	*	Peak_2480	53	.	Intron (ENST00000327483.9/863, intron 1 of 10)	16	88939789	88951524	11736	1	100129697	ENST00000378347.2	-5159	ENSG00000205018	LOC100129697	uncharacterized LOC100129697
chr16	89061288	89061517	230	*	Peak_7683	40	.	Distal Intergenic	16	89088375	89114473	26099	1	197322	ENST00000537895.5	-26858	ENSG00000176715	ACSF3	acyl-CoA synthetase family member 3
chr16	89087060	89087516	457	*	Peak_11809	34	.	Promoter (<=1kb)	16	89088375	89114473	26099	1	197322	ENST00000537895.5	-859	ENSG00000176715	ACSF3	acyl-CoA synthetase family member 3
chr16	89485050	89485469	420	*	Peak_5640	45	.	Intron (ENST00000301030.9/29123, intron 1 of 12)	16	89291728	89489193	197466	2	29123	ENST00000562816.5	3724	ENSG00000167522	ANKRD11	ankyrin repeat domain 11
chr16	89910706	89911209	504	*	Peak_11810	34	.	Promoter (<=1kb)	16	89910293	89911379	1087	1	22980	ENST00000565860.1	413	ENSG00000141002	TCF25	transcription factor 25
chr16	89912664	89912982	319	*	Peak_633	75	.	Promoter (2-3kb)	16	89910293	89911379	1087	1	22980	ENST00000565860.1	2371	ENSG00000141002	TCF25	transcription factor 25
chr16	90009591	90010186	596	*	Peak_11811	34	.	Promoter (<=1kb)	16	90004865	90010121	5257	2	79007	ENST00000304733.7	0	ENSG00000003249	DBNDD1	dysbindin domain containing 1
chr1	6907342	6908039	698	*	Peak_16062	29	.	Intron (ENST00000303635.11/23261, intron 3 of 22)	1	6874056	6887842	13787	1	23261	ENST00000467267.1	33286	ENSG00000171735	CAMTA1	calmodulin binding transcription activator 1
chr1	69105743	69105992	250	*	Peak_9950	36	.	Intron (ENST00000425517.1/105378785, intron 3 of 4)	1	69055898	69185003	129106	1	105378785	ENST00000425517.1	49845	ENSG00000223883	LINC01707	long intergenic non-protein coding RNA 1707
chr1	6911280	6911544	265	*	Peak_9787	36	.	Intron (ENST00000303635.11/23261, intron 3 of 22)	1	6874056	6887842	13787	1	23261	ENST00000467267.1	37224	ENSG00000171735	CAMTA1	calmodulin binding transcription activator 1
chr16	914898	915163	266	*	Peak_1468	60	.	Intron (ENST00000262301.15/64788, intron 3 of 10)	16	921033	934266	13234	1	101929387	ENST00000567820.1	-5870	ENSG00000260439	LMF1-AS1	LMF1 antisense RNA 1
chr1	6934288	6934571	284	*	Peak_4520	46	.	Intron (ENST00000303635.11/23261, intron 3 of 22)	1	6874056	6887842	13787	1	23261	ENST00000467267.1	60232	ENSG00000171735	CAMTA1	calmodulin binding transcription activator 1
chr1	69442917	69443248	332	*	Peak_5908	44	.	Distal Intergenic	1	69433255	69435409	2155	1	105378788	ENST00000448001.1	9662	ENSG00000229639	LINC01758	long intergenic non-protein coding RNA 1758
chr16	945858	946113	256	*	Peak_1469	60	.	Promoter (1-2kb)	16	871287	947644	76358	2	64788	ENST00000566627.5	1531	ENSG00000103227	LMF1	lipase maturation factor 1
chr16	959291	959610	320	*	Peak_16467	28	.	Intron (ENST00000262301.15/64788, intron 1 of 10)	16	910980	964122	53143	2	64788	ENST00000562380.5	4512	ENSG00000103227	LMF1	lipase maturation factor 1
chr16	979796	980111	316	*	Peak_3636	48	.	Promoter (<=1kb)	16	975761	980913	5153	2	64788	ENST00000562570.1	802	ENSG00000103227	LMF1	lipase maturation factor 1
chr1	70311266	70311554	289	*	Peak_2215	54	.	Promoter (2-3kb)	1	70292146	70313790	21645	2	81573	ENST00000490846.5	2236	ENSG00000118454	ANKRD13C	ankyrin repeat domain 13C
chr1	7039029	7039299	271	*	Peak_3002	51	.	Intron (ENST00000303635.11/23261, intron 3 of 22)	1	6874056	6887842	13787	1	23261	ENST00000467267.1	164973	ENSG00000171735	CAMTA1	calmodulin binding transcription activator 1
chr1	70474893	70475172	280	*	Peak_8178	40	.	Distal Intergenic	1	70434851	70439232	4382	1	1491	ENST00000482383.1	40042	ENSG00000116761	CTH	cystathionine gamma-lyase
chr1	7057459	7057877	419	*	Peak_13991	32	.	Intron (ENST00000303635.11/23261, intron 3 of 22)	1	6874056	6887842	13787	1	23261	ENST00000467267.1	183403	ENSG00000171735	CAMTA1	calmodulin binding transcription activator 1
chr1	70641807	70642218	412	*	Peak_11813	34	.	Distal Intergenic	1	70706453	70786468	80016	1	101927244	ENST00000419450.1	-64235	ENSG00000229051	LINC01788	long intergenic non-protein coding RNA 1788
chr1	7091288	7091719	432	*	Peak_2481	53	.	Exon (ENST00000303635.11/23261, exon 4 of 23)	1	6874056	6887842	13787	1	23261	ENST00000467267.1	217232	ENSG00000171735	CAMTA1	calmodulin binding transcription activator 1
chr1	70929655	70929919	265	*	Peak_7685	40	.	Intron (ENST00000370931.7/5733, intron 4 of 4)	1	70852573	71047633	195061	2	5733	ENST00000460330.5	117714	ENSG00000050628	PTGER3	prostaglandin E receptor 3
chr1	70936886	70937284	399	*	Peak_16470	28	.	Intron (ENST00000370931.7/5733, intron 4 of 4)	1	70852573	71047633	195061	2	5733	ENST00000460330.5	110349	ENSG00000050628	PTGER3	prostaglandin E receptor 3
chr1	70979491	70979867	377	*	Peak_6561	42	.	Intron (ENST00000370931.7/5733, intron 2 of 4)	1	70852573	71047633	195061	2	5733	ENST00000460330.5	67766	ENSG00000050628	PTGER3	prostaglandin E receptor 3
chr17	1030413	1030898	486	*	Peak_976	67	.	Promoter (<=1kb)	17	1005010	1031802	26793	2	29	ENST00000572441.5	904	ENSG00000159842	ABR	ABR activator of RhoGEF and GTPase
chr17	1073083	1073589	507	*	Peak_8501	39	.	Intron (ENST00000302538.9/29, intron 7 of 22)	17	1050554	1069983	19430	2	29	ENST00000574544.1	-3100	ENSG00000159842	ABR	ABR activator of RhoGEF and GTPase
chr1	7113133	7113363	231	*	Peak_5439	45	.	Intron (ENST00000303635.11/23261, intron 4 of 22)	1	6874056	6887842	13787	1	23261	ENST00000467267.1	239077	ENSG00000171735	CAMTA1	calmodulin binding transcription activator 1
chr17	1251147	1251437	291	*	Peak_5200	46	.	Intron (ENST00000575911.1/ENST00000575911.1, intron 1 of 1)	17	1270559	1271460	902	1	727857	ENST00000391429.1	-19122	ENSG00000205899	BHLHA9	basic helix-loop-helix family member a9
chr17	1279915	1280747	833	*	Peak_10611	35	.	Promoter (<=1kb)	17	1279663	1300987	21325	1	286753	ENST00000333813.3	252	ENSG00000184811	TRARG1	trafficking regulator of GLUT4 (SLC2A4) 1
chr1	7128418	7128649	232	*	Peak_13137	33	.	Intron (ENST00000303635.11/23261, intron 4 of 22)	1	6874056	6887842	13787	1	23261	ENST00000467267.1	254362	ENSG00000171735	CAMTA1	calmodulin binding transcription activator 1
chr17	1287053	1287561	509	*	Peak_2039	56	.	Intron (ENST00000333813.3/286753, intron 1 of 2)	17	1279663	1300987	21325	1	286753	ENST00000333813.3	7390	ENSG00000184811	TRARG1	trafficking regulator of GLUT4 (SLC2A4) 1
chr17	12876525	12876754	230	*	Peak_11816	34	.	Intron (ENST00000379672.9/9912, intron 1 of 20)	17	12917268	12917342	75	2	100616494	ENST00000580405.1	40588	ENSG00000265503	MIR1269B	microRNA 1269b
chr17	13040950	13041341	392	*	Peak_4521	46	.	Distal Intergenic	17	12992391	13018187	25797	2	60528	ENST00000338034.8	-22763	ENSG00000006744	ELAC2	elaC ribonuclease Z 2
chr17	1312454	1312859	406	*	Peak_784	71	.	Distal Intergenic	17	1279663	1300987	21325	1	286753	ENST00000333813.3	32791	ENSG00000184811	TRARG1	trafficking regulator of GLUT4 (SLC2A4) 1
chr17	14015967	14016433	467	*	Peak_16471	28	.	Intron (ENST00000602743.1/100874058, intron 1 of 4)	17	14029292	14069458	40167	2	100874058	ENST00000449363.1	53025	ENSG00000236088	COX10-AS1	COX10 antisense RNA 1
chr17	14783567	14783796	230	*	Peak_4522	46	.	Distal Intergenic	17	15014805	15052276	37472	1	101928475	ENST00000446671.1	-231009	ENSG00000232058	LOC101928475	uncharacterized LOC101928475
chr17	1509723	1510044	322	*	Peak_11186	34	.	Promoter (1-2kb)	17	1498061	1508500	10440	2	51763	ENST00000481867.1	-1223	ENSG00000132376	INPP5K	inositol polyphosphate-5-phosphatase K
chr17	16292789	16293562	774	*	Peak_3564	48	.	Intron (ENST00000607144.4/9487, intron 2 of 2)	17	16282014	16282088	75	1	100302124	ENST00000408428.1	10775	ENSG00000221355	MIR1288	microRNA 1288
chr17	16554111	16554485	375	*	Peak_8707	39	.	Intron (ENST00000395824.5/57336, intron 5 of 5)	17	16553110	16563264	10155	2	57336	ENST00000498796.1	8779	ENSG00000141040	ZNF287	zinc finger protein 287
chr17	16569094	16569485	392	*	Peak_9951	36	.	Promoter (<=1kb)	17	16551387	16569169	17783	2	57336	ENST00000395824.5	0	ENSG00000141040	ZNF287	zinc finger protein 287
chr17	16577737	16578251	515	*	Peak_10612	35	.	Distal Intergenic	17	16551387	16569206	17820	2	57336	ENST00000395825.3	-8531	ENSG00000141040	ZNF287	zinc finger protein 287
chr17	16676851	16677186	336	*	Peak_1964	57	.	Distal Intergenic	17	16689537	16695486	5950	1	9720	ENST00000478303.5	-12351	ENSG00000170160	CCDC144A	coiled-coil domain containing 144A
chr17	16765892	16766121	230	*	Peak_4523	46	.	Exon (ENST00000470068.2/9720, exon 6 of 7)	17	16786489	16798429	11941	1	162632	ENST00000417524.5	-20368	ENSG00000188933	USP32P1	ubiquitin specific peptidase 32 pseudogene 1
chr17	16806467	16806926	460	*	Peak_335	90	.	Intron (ENST00000602730.1/162632, intron 7 of 10)	17	16798009	16804455	6447	1	162632	ENST00000341745.3	8458	ENSG00000188933	USP32P1	ubiquitin specific peptidase 32 pseudogene 1
chr17	16810039	16810297	259	*	Peak_2366	53	.	Exon (ENST00000602730.1/162632, exon 9 of 11)	17	16798009	16804455	6447	1	162632	ENST00000341745.3	12030	ENSG00000188933	USP32P1	ubiquitin specific peptidase 32 pseudogene 1
chr17	16868417	16869108	692	*	Peak_1668	60	.	Distal Intergenic	17	16843865	16845881	2017	2	147228	ENST00000580363.1	-22536	NA	KRT17P1	keratin 17 pseudogene 1
chr17	16881307	16881792	486	*	Peak_3773	47	.	Distal Intergenic	17	16843865	16845881	2017	2	147228	ENST00000580363.1	-35426	NA	KRT17P1	keratin 17 pseudogene 1
chr17	170194	170429	236	*	Peak_13344	33	.	Intron (ENST00000613549.2/8447, intron 2 of 8)	17	156019	162172	6154	2	8447	ENST00000343572.8	-8022	ENSG00000272636	DOC2B	double C2 domain beta
chr17	17387619	17387919	301	*	Peak_6183	43	.	Distal Intergenic	17	17345269	17347152	1884	1	56953	ENST00000480529.1	42350	ENSG00000205309	NT5M	5',3'-nucleotidase, mitochondrial
chr17	17517693	17517946	254	*	Peak_13253	33	.	Promoter (<=1kb)	17	17505563	17518157	12595	2	10400	ENST00000484838.6	211	ENSG00000133027	PEMT	phosphatidylethanolamine N-methyltransferase
chr17	18572597	18572885	289	*	Peak_2483	53	.	Exon (ENST00000442562.1/ENST00000442562.1, exon 1 of 1)	17	18551028	18554265	3238	2	284047	ENST00000609959.1	-18332	ENSG00000154874	CCDC144B	coiled-coil domain containing 144B (pseudogene)
chr17	18634955	18635450	496	*	Peak_3664	47	.	3' UTR	17	18635006	18642424	7419	2	254272	ENST00000345096.8	6974	ENSG00000189375	TBC1D28	TBC1 domain family member 28
chr17	19022378	19022738	361	*	Peak_8833	38	.	3' UTR	17	19017641	19019729	2089	1	125206	ENST00000584658.1	4737	ENSG00000154025	SLC5A10	solute carrier family 5 member 10
chr17	19240511	19240761	251	*	Peak_14276	31	.	Intron (ENST00000582015.5/22905, intron 1 of 2)	17	19237497	19283100	45604	1	22905	ENST00000582969.5	3014	ENSG00000072134	EPN2	epsin 2
chr17	19370467	19371344	878	*	Peak_836	69	.	Exon (ENST00000476298.2/27077, exon 3 of 3)	17	19377721	19383543	5823	1	5598	ENST00000308406.9	-6377	ENSG00000166484	MAPK7	mitogen-activated protein kinase 7
chr17	19525388	19525909	522	*	Peak_15831	29	.	Intron (ENST00000584348.5/55244, intron 1 of 6)	17	19533462	19577597	44136	1	55244	ENST00000571335.5	-7553	ENSG00000142494	SLC47A1	solute carrier family 47 member 1
chr17	19533726	19534344	619	*	Peak_6507	42	.	Promoter (<=1kb)	17	19533828	19577611	43784	1	55244	ENST00000436810.6	0	ENSG00000142494	SLC47A1	solute carrier family 47 member 1
chr17	19535392	19535686	295	*	Peak_9788	36	.	Promoter (1-2kb)	17	19533880	19578906	45027	1	55244	ENST00000395585.5	1512	ENSG00000142494	SLC47A1	solute carrier family 47 member 1
chr17	19579322	19579635	314	*	Peak_5909	44	.	Intron (ENST00000574267.1/ENST00000574267.1, intron 1 of 3)	17	19572797	19578904	6108	1	55244	ENST00000581558.1	6525	ENSG00000142494	SLC47A1	solute carrier family 47 member 1
chr17	1982826	1983074	249	*	Peak_1202	63	.	Intron (ENST00000331238.6/146760, intron 1 of 1)	17	2017716	2019102	1387	1	105371485	ENST00000572287.1	-34642	ENSG00000228133	LOC105371485	uncharacterized LOC105371485
chr17	2027756	2028886	1131	*	Peak_1761	59	.	Promoter (1-2kb)	17	2030110	2043430	13321	1	1801	ENST00000263083.10	-1224	ENSG00000108963	DPH1	diphthamide biosynthesis 1
chr17	203457	203702	246	*	Peak_4525	46	.	Distal Intergenic	17	183824	191587	7764	2	100506371	ENST00000576171.1	-11870	NA	LINC02091	long intergenic non-protein coding RNA 2091
chr17	20614300	20614652	353	*	Peak_15118	30	.	Exon (ENST00000428134.1/105371582, exon 3 of 4)	17	20612912	20633234	20323	2	105371582	ENST00000428134.1	18582	ENSG00000227685	LINC02088	long intergenic non-protein coding RNA 2088
chr17	20866930	20867159	230	*	Peak_4526	46	.	Promoter (1-2kb)	17	20836447	20868208	31762	2	339184	ENST00000539484.1	1049	ENSG00000205212	CCDC144NL	coiled-coil domain containing 144 family, N-terminal like
chr17	2093856	2094117	262	*	Peak_8709	39	.	Promoter (<=1kb)	17	2081916	2095112	13197	2	23293	ENST00000575338.1	995	ENSG00000070366	SMG6	SMG6 nonsense mediated mRNA decay factor
chr17	20988396	20988928	533	*	Peak_9526	37	.	Intron (ENST00000439794.6/339260, intron 3 of 3)	17	21004220	21005150	931	2	23326	ENST00000463692.1	16222	ENSG00000124422	USP22	ubiquitin specific peptidase 22
chr17	21071112	21071413	302	*	Peak_9107	38	.	Distal Intergenic	17	21075556	21090615	15060	1	101060544	ENST00000456235.1	-4143	ENSG00000236819	LINC01563	long intergenic non-protein coding RNA 1563
chr17	21298414	21298953	540	*	Peak_11307	34	.	5' UTR	17	21291469	21314965	23497	1	5606	ENST00000613338.4	6945	ENSG00000034152	MAP2K3	mitogen-activated protein kinase kinase 3
chr17	2231983	2232662	680	*	Peak_908	67	.	Promoter (<=1kb)	17	2232680	2233610	931	1	101927839	ENST00000414776.1	-18	ENSG00000225084	LOC101927839	uncharacterized LOC101927839
chr1	7240529	7240803	275	*	Peak_9952	36	.	Intron (ENST00000303635.11/23261, intron 4 of 22)	1	7388183	7389419	1237	2	102725193	ENST00000411708.1	148616	ENSG00000237728	LOC102725193	uncharacterized LOC102725193
chr17	2581382	2581727	346	*	Peak_4527	46	.	Distal Intergenic	17	2593210	2667045	73836	1	5048	ENST00000576586.5	-11483	ENSG00000007168	PAFAH1B1	platelet activating factor acetylhydrolase 1b regulatory subunit 1
chr17	2685657	2686056	400	*	Peak_1850	58	.	Distal Intergenic	17	2679687	2681744	2058	1	5048	ENST00000610190.1	5970	ENSG00000007168	PAFAH1B1	platelet activating factor acetylhydrolase 1b regulatory subunit 1
chr17	28604986	28605760	775	*	Peak_20132	22	.	3' UTR	17	28577574	28599279	21706	2	10615	ENST00000321765.9	-5707	ENSG00000076382	SPAG5	sperm associated antigen 5
chr17	28820078	28820464	387	*	Peak_16125	29	.	Intron (ENST00000581407.5/55731, intron 1 of 2)	17	28757390	28812435	55046	2	55731	ENST00000452648.7	-7643	ENSG00000173065	FAM222B	family with sequence similarity 222 member B
chr17	29019903	29020205	303	*	Peak_9283	37	.	Intron (ENST00000580241.5/51268, intron 2 of 9)	17	28981550	29006440	24891	2	124925	ENST00000585644.1	-13463	ENSG00000063015	SEZ6	seizure related 6 homolog
chr17	29083867	29085090	1224	*	Peak_590	75	.	Promoter (1-2kb)	17	29074748	29082438	7691	2	399687	ENST00000636100.1	-1429	ENSG00000196535	MYO18A	myosin XVIIIA
chr17	29531504	29531980	477	*	Peak_10613	35	.	Intron (ENST00000261716.7/57551, intron 18 of 19)	17	29522288	29530738	8451	1	57551	ENST00000578653.1	9216	ENSG00000160551	TAOK1	TAO kinase 1
chr17	29574554	29574929	376	*	Peak_6525	42	.	Promoter (1-2kb)	17	29574986	29576131	1146	2	28964	ENST00000578266.1	1202	ENSG00000108262	GIT1	GIT ArfGAP 1
chr17	29785738	29785976	239	*	Peak_4529	46	.	Intron (ENST00000577846.1/ENST00000577846.1, intron 2 of 2)	17	29630800	29761417	130618	2	85464	ENST00000649863.1	-24321	ENSG00000141298	SSH2	slingshot protein phosphatase 2
chr17	30942981	30943405	425	*	Peak_2485	53	.	Promoter (1-2kb)	17	30945028	30958339	13312	1	55803	ENST00000584828.5	-1623	ENSG00000184060	ADAP2	ArfGAP with dual PH domains 2
chr17	30950228	30950848	621	*	Peak_12944	34	.	Intron (ENST00000585130.5/55803, intron 6 of 9)	17	30954240	30956728	2489	1	55803	ENST00000480980.1	-3392	ENSG00000184060	ADAP2	ArfGAP with dual PH domains 2
chr17	31080757	31081484	728	*	Peak_7688	40	.	Intron (ENST00000580053.1/ENST00000580053.1, intron 2 of 3)	17	31094350	31094425	76	2	100616266	ENST00000578268.1	12941	ENSG00000265444	MIR4733	microRNA 4733
chr17	31457253	31457550	298	*	Peak_20133	22	.	Intron (ENST00000621161.4/84440, intron 3 of 14)	17	31431813	31448495	16683	1	84440	ENST00000579908.1	25440	ENSG00000131242	RAB11FIP4	RAB11 family interacting protein 4
chr17	31659551	31659961	411	*	Peak_1246	62	.	Distal Intergenic	17	31575411	31575521	111	1	100126356	ENST00000362317.1	84140	ENSG00000283978	MIR365B	microRNA 365b
chr17	31891803	31892051	249	*	Peak_5982	44	.	Intron (ENST00000261708.8/55813, intron 6 of 18)	17	31863174	31888221	25048	2	55813	ENST00000477128.5	-3582	ENSG00000108651	UTP6	UTP6 small subunit processome component
chr17	32079960	32080194	235	*	Peak_2486	53	.	Distal Intergenic	17	32048978	32050582	1605	1	114659	ENST00000579766.1	30982	ENSG00000185158	LRRC37B	leucine rich repeat containing 37B
chr17	32263053	32263427	375	*	Peak_6325	42	.	Promoter (2-3kb)	17	32266176	32321362	55187	1	162494	ENST00000578006.5	-2749	ENSG00000141314	RHBDL3	rhomboid like 3
chr17	322663	322910	248	*	Peak_10614	35	.	Intron (ENST00000618002.4/9501, intron 2 of 8)	17	214702	319480	104779	2	9501	ENST00000576001.5	-3183	ENSG00000181031	RPH3AL	rabphilin 3A like (without C2 domains)
chr17	32281272	32281676	405	*	Peak_17646	27	.	Promoter (2-3kb)	17	32284152	32316274	32123	1	162494	ENST00000582967.1	-2476	ENSG00000141314	RHBDL3	rhomboid like 3
chr17	32510109	32510367	259	*	Peak_6562	42	.	Exon (ENST00000578408.1/ENST00000578408.1, exon 2 of 2)	17	32494453	32497073	2621	2	4642	ENST00000577576.1	-13036	ENSG00000176658	MYO1D	myosin ID
chr17	32762057	32762399	343	*	Peak_909	67	.	Promoter (1-2kb)	17	32727587	32760396	32810	2	4642	ENST00000584232.5	-1661	ENSG00000176658	MYO1D	myosin ID
chr17	36003229	36003485	257	*	Peak_11824	34	.	Promoter (1-2kb)	17	35997582	36002038	4457	2	6359	ENST00000617897.1	-1191	ENSG00000275718	CCL15	C-C motif chemokine ligand 15
chr17	36700244	36700682	439	*	Peak_15347	30	.	Distal Intergenic	17	36601962	36608964	7003	1	79922	ENST00000612760.1	98282	ENSG00000278619	MRM1	mitochondrial rRNA methyltransferase 1
chr17	3714523	3714908	386	*	Peak_15121	30	.	3' UTR	17	3714653	3718379	3727	2	3682	ENST00000571937.1	3471	ENSG00000083457	ITGAE	integrin subunit alpha E
chr17	3716681	3717073	393	*	Peak_6261	43	.	Promoter (1-2kb)	17	3714653	3718379	3727	2	3682	ENST00000571937.1	1306	ENSG00000083457	ITGAE	integrin subunit alpha E
chr17	37255248	37255512	265	*	Peak_14656	31	.	Intron (ENST00000616317.4/31, intron 14 of 55)	17	37247902	37248676	775	2	31	ENST00000612926.1	-6572	ENSG00000278540	ACACA	acetyl-CoA carboxylase alpha
chr17	37451772	37452235	464	*	Peak_18897	25	.	Promoter (1-2kb)	17	37450565	37476956	26392	1	6871	ENST00000619335.4	1207	ENSG00000276234	TADA2A	transcriptional adaptor 2A
chr17	37851907	37852136	230	*	Peak_11827	34	.	Intron (ENST00000617508.4/284100, intron 2 of 3)	17	37828305	37855212	26908	2	284100	ENST00000617508.4	3076	ENSG00000276715	YWHAEP7	tyrosine 3-monooxygenase/tryptophan 5-monooxygenase activation protein epsilon pseudogene 7
chr17	38874524	38875271	748	*	Peak_128	132	.	Promoter (<=1kb)	17	38873890	38915141	41252	1	3927	ENST00000419929.1	634	ENSG00000002834	LASP1	LIM and SH3 protein 1
chr17	39829600	39829829	230	*	Peak_11828	34	.	Intron (ENST00000346872.7/22806, intron 2 of 7)	17	39765790	39864126	98337	2	22806	ENST00000346243.7	34297	ENSG00000161405	IKZF3	IKAROS family zinc finger 3
chr17	39868094	39868323	230	*	Peak_14503	31	.	Promoter (<=1kb)	17	39868164	39877144	8981	1	124626	ENST00000348931.8	0	ENSG00000186075	ZPBP2	zona pellucida binding protein 2
chr17	3988521	3988791	271	*	Peak_8711	39	.	Distal Intergenic	17	3977103	3981899	4797	1	105371496	ENST00000571890.1	11418	NA	LINC01975	long intergenic non-protein coding RNA 1975
chr17	40252228	40252707	480	*	Peak_8179	40	.	Intron (ENST00000583268.1/147179, intron 1 of 3)	17	40256388	40260838	4451	1	147179	ENST00000578304.1	-3681	ENSG00000171475	WIPF2	WAS/WASL interacting protein family member 2
chr17	40295829	40296076	248	*	Peak_9108	38	.	Intron (ENST00000209728.8/990, intron 8 of 11)	17	40291467	40295506	4040	1	990	ENST00000582402.1	4362	ENSG00000094804	CDC6	cell division cycle 6
chr1	7409198	7409703	506	*	Peak_3895	47	.	Intron (ENST00000303635.11/23261, intron 5 of 22)	1	7382487	7389754	7268	2	102725193	ENST00000618051.1	-19444	ENSG00000237728	LOC102725193	uncharacterized LOC102725193
chr17	41441022	41441340	319	*	Peak_15349	30	.	Promoter (<=1kb)	17	41436446	41440921	4476	2	8687	ENST00000246646.3	-101	ENSG00000171360	KRT38	keratin 38
chr17	4213028	4213304	277	*	Peak_5228	46	.	Intron (ENST00000341657.8/51479, intron 4 of 24)	17	4195455	4208132	12678	2	51479	ENST00000573250.2	-4896	ENSG00000185722	ANKFY1	ankyrin repeat and FYVE domain containing 1
chr17	43375678	43375983	306	*	Peak_18614	25	.	Exon (ENST00000592135.5/100130581, exon 4 of 4)	17	43375928	43388312	12385	2	100130581	ENST00000592135.5	12329	ENSG00000188825	LINC00910	long intergenic non-protein coding RNA 910
chr17	43473581	43473856	276	*	Peak_2938	52	.	Exon (ENST00000516920.1/ENST00000516920.1, exon 1 of 1)	17	43483865	43492292	8428	1	1659	ENST00000592258.5	-10009	ENSG00000067596	DHX8	DEAH-box helicase 8
chr17	43572248	43573067	820	*	Peak_9245	37	.	Intron (ENST00000650571.1/1659, intron 24 of 24)	17	43544976	43579620	34645	2	2118	ENST00000586764.1	6553	ENSG00000175832	ETV4	ETS variant 4
chr17	43609161	43609400	240	*	Peak_3250	50	.	Intron (ENST00000588996.1/ENST00000588996.1, intron 2 of 2)	17	43544976	43579620	34645	2	2118	ENST00000586764.1	-29541	ENSG00000175832	ETV4	ETS variant 4
chr17	43634106	43634365	260	*	Peak_6910	41	.	Distal Intergenic	17	43640402	43661563	21162	2	4222	ENST00000329168.3	27198	ENSG00000005102	MEOX1	mesenchyme homeobox 1
chr17	43817506	43818217	712	*	Peak_399	86	.	Promoter (2-3kb)	17	43814011	43820914	6904	2	4356	ENST00000479797.1	2697	ENSG00000161647	MPP3	membrane palmitoylated protein 3
chr17	44591290	44592044	755	*	Peak_37	187	.	Distal Intergenic	17	44557459	44559570	2112	1	2535	ENST00000315323.4	33831	ENSG00000180340	FZD2	frizzled class receptor 2
chr17	44656991	44657289	299	*	Peak_818	70	.	Promoter (<=1kb)	17	44656472	44675799	19328	1	284071	ENST00000409122.6	519	ENSG00000180336	MEIOC	meiosis specific with coiled-coil domain
chr17	44772447	44772837	391	*	Peak_2100	56	.	Promoter (2-3kb)	17	44769986	44780610	10625	1	4185	ENST00000587773.1	2461	ENSG00000073670	ADAM11	ADAM metallopeptidase domain 11
chr17	45007238	45007586	349	*	Peak_13487	33	.	Distal Intergenic	17	45032044	45034889	2846	2	79877	ENST00000592902.5	27303	ENSG00000172992	DCAKD	dephospho-CoA kinase domain containing
chr17	45516050	45516293	244	*	Peak_2071	56	.	Promoter (<=1kb)	17	45506741	45515156	8416	2	55073	ENST00000579913.5	-894	NA	LRRC37A4P	leucine rich repeat containing 37 member A4, pseudogene
chr17	45652190	45652788	599	*	Peak_1697	59	.	Exon (ENST00000591271.5/147081, exon 4 of 4)	17	45639437	45646232	6796	1	147081	ENST00000592428.1	12753	ENSG00000204650	LINC02210	long intergenic non-protein coding RNA 2210
chr17	45667817	45668074	258	*	Peak_3801	47	.	Intron (ENST00000634540.1/104909134, intron 3 of 14)	17	45639437	45646232	6796	1	147081	ENST00000592428.1	28380	ENSG00000204650	LINC02210	long intergenic non-protein coding RNA 2210
chr17	45716157	45717155	999	*	Peak_583	76	.	Intron (ENST00000634540.1/104909134, intron 3 of 14)	17	45784280	45835827	51548	1	1394	ENST00000293493.11	-67125	ENSG00000120088	CRHR1	corticotropin releasing hormone receptor 1
chr17	45796893	45797190	298	*	Peak_3647	48	.	Intron (ENST00000634540.1/104909134, intron 3 of 14)	17	45807074	45830125	23052	1	1394	ENST00000580955.5	-9884	ENSG00000120088	CRHR1	corticotropin releasing hormone receptor 1
chr17	45806207	45806554	348	*	Peak_13038	34	.	Promoter (<=1kb)	17	45807074	45830125	23052	1	1394	ENST00000580955.5	-520	ENSG00000120088	CRHR1	corticotropin releasing hormone receptor 1
chr17	45824976	45825275	300	*	Peak_2935	52	.	Intron (ENST00000634540.1/104909134, intron 6 of 14)	17	45830400	45833202	2803	1	1394	ENST00000581479.1	-5125	ENSG00000120088	CRHR1	corticotropin releasing hormone receptor 1
chr17	45883242	45883506	265	*	Peak_13605	32	.	Intron (ENST00000634876.1/100128977, intron 1 of 6)	17	45894382	46028334	133953	1	4137	ENST00000262410.9	-10876	ENSG00000186868	MAPT	microtubule associated protein tau
chr17	45965861	45966139	279	*	Peak_3448	49	.	Intron (ENST00000262410.9/4137, intron 2 of 13)	17	45962338	46024171	61834	1	4137	ENST00000574436.5	3523	ENSG00000186868	MAPT	microtubule associated protein tau
chr17	45983587	45984043	457	*	Peak_6103	43	.	Promoter (1-2kb)	17	45985659	45987095	1437	1	4137	ENST00000577017.1	-1616	ENSG00000186868	MAPT	microtubule associated protein tau
chr17	45986152	45986381	230	*	Peak_6367	42	.	Promoter (<=1kb)	17	45985659	45987095	1437	1	4137	ENST00000577017.1	493	ENSG00000186868	MAPT	microtubule associated protein tau
chr17	46256174	46256718	545	*	Peak_6402	42	.	Distal Intergenic	17	46029916	46225389	195474	2	284058	ENST00000574590.6	-30785	ENSG00000120071	KANSL1	KAT8 regulatory NSL complex subunit 1
chr17	4684314	4684821	508	*	Peak_4533	46	.	Intron (ENST00000631268.1/ENST00000631268.1, intron 1 of 1)	17	4682725	4691214	8490	2	27043	ENST00000571170.1	6393	ENSG00000141456	PELP1	proline, glutamate and leucine rich protein 1
chr17	46957348	46958020	673	*	Peak_1326	60	.	Intron (ENST00000640792.1/9570, intron 6 of 7)	17	46973017	46973100	84	1	100847067	ENST00000580047.1	-14997	ENSG00000264999	MIR5089	microRNA 5089
chr17	46990715	46990944	230	*	Peak_9668	36	.	Intron (ENST00000571841.1/9570, intron 7 of 9)	17	46978156	46979248	1093	2	388394	ENST00000322329.4	-11467	ENSG00000179673	RPRML	reprimo like
chr17	47386406	47386641	236	*	Peak_3430	49	.	Intron (ENST00000331493.6/124989, intron 14 of 24)	17	47377816	47414975	37160	1	124989	ENST00000523842.1	8590	ENSG00000178852	EFCAB13	EF-hand calcium binding domain 13
chr1	74739783	74740026	244	*	Peak_5771	44	.	Intron (ENST00000457880.6/127253, intron 2 of 4)	1	74736189	74752394	16206	1	127253	ENST00000483990.1	3594	ENSG00000162623	TYW3	tRNA-yW synthesizing protein 3 homolog
chr17	47465730	47466222	493	*	Peak_6609	42	.	Intron (ENST00000425159.7/653479, intron 4 of 5)	17	47455368	47490218	34851	2	653479	ENST00000572695.5	23996	NA	MRPL45P2	mitochondrial ribosomal protein L45 pseudogene 2
chr17	47475361	47475617	257	*	Peak_7136	41	.	Intron (ENST00000425159.7/653479, intron 4 of 5)	17	47455368	47490218	34851	2	653479	ENST00000572695.5	14601	NA	MRPL45P2	mitochondrial ribosomal protein L45 pseudogene 2
chr17	47660118	47660348	231	*	Peak_15857	29	.	Intron (ENST00000535458.6/3837, intron 4 of 20)	17	47656925	47682680	25756	1	3837	ENST00000582097.5	3193	ENSG00000108424	KPNB1	karyopherin subunit beta 1
chr1	7477629	7477920	292	*	Peak_14601	31	.	Intron (ENST00000303635.11/23261, intron 6 of 22)	1	7382487	7389754	7268	2	102725193	ENST00000618051.1	-87875	ENSG00000237728	LOC102725193	uncharacterized LOC102725193
chr17	48361169	48361536	368	*	Peak_3775	47	.	Intron (ENST00000336915.10/8631, intron 3 of 12)	17	48137229	48346005	208777	2	8631	ENST00000581400.2	-15164	ENSG00000141293	SKAP1	src kinase associated phosphoprotein 1
chr17	48438815	48439211	397	*	Peak_14252	31	.	Distal Intergenic	17	48133445	48430275	296831	2	8631	ENST00000584709.5	-8540	ENSG00000141293	SKAP1	src kinase associated phosphoprotein 1
chr17	48530570	48530967	398	*	Peak_17488	27	.	Promoter (<=1kb)	17	48528526	48530997	2472	2	3211	ENST00000239174.6	30	ENSG00000120094	HOXB1	homeobox B1
chr17	48718639	48719071	433	*	Peak_3314	49	.	Downstream (2-3kb)	17	48721719	48722522	804	2	84366	ENST00000290294.4	3451	ENSG00000159182	PRAC1	PRAC1 small nuclear protein
chr17	49086884	49087197	314	*	Peak_6287	43	.	Distal Intergenic	17	49132460	49169989	37530	1	124872	ENST00000504681.5	-45263	ENSG00000167080	B4GALNT2	beta-1,4-N-acetyl-galactosaminyltransferase 2
chr17	49156550	49157100	551	*	Peak_832	70	.	Exon (ENST00000504681.5/124872, exon 5 of 11)	17	49132967	49169874	36908	1	124872	ENST00000300404.2	23583	ENSG00000167080	B4GALNT2	beta-1,4-N-acetyl-galactosaminyltransferase 2
chr1	74949920	74950337	418	*	Peak_16478	28	.	Distal Intergenic	1	75128434	75161533	33100	1	431707	ENST00000294638.9	-178097	ENSG00000162624	LHX8	LIM homeobox 8
chr17	49503556	49503788	233	*	Peak_9056	38	.	Intron (ENST00000172229.7/4804, intron 2 of 5)	17	49497391	49513372	15982	1	4804	ENST00000504201.1	6165	ENSG00000064300	NGFR	nerve growth factor receptor
chr1	7495173	7495427	255	*	Peak_8465	39	.	Intron (ENST00000303635.11/23261, intron 6 of 22)	1	7382487	7389754	7268	2	102725193	ENST00000618051.1	-105419	ENSG00000237728	LOC102725193	uncharacterized LOC102725193
chr17	49520001	49520262	262	*	Peak_2150	55	.	Intron (ENST00000514506.1/100288866, intron 1 of 2)	17	49510817	49510900	84	1	102465141	ENST00000614803.1	9184	ENSG00000277478	MIR6165	microRNA 6165
chr17	50070966	50072383	1418	*	Peak_38	187	.	Promoter (<=1kb)	17	50071740	50074211	2472	1	3675	ENST00000505552.1	0	ENSG00000005884	ITGA3	integrin subunit alpha 3
chr17	50167321	50167647	327	*	Peak_11228	34	.	Promoter (<=1kb)	17	50167581	50175387	7807	1	6442	ENST00000512526.1	0	ENSG00000108823	SGCA	sarcoglycan alpha
chr17	50305239	50305550	312	*	Peak_3400	49	.	Distal Intergenic	17	50281577	50287855	6279	2	103752589	ENST00000508851.1	-17384	ENSG00000251179	TMEM92-AS1	TMEM92 antisense RNA 1
chr17	5078133	5078724	592	*	Peak_4534	46	.	Promoter (<=1kb)	17	5078248	5096374	18127	1	124961	ENST00000318833.3	0	ENSG00000180787	ZFP3	ZFP3 zinc finger protein
chr17	50798844	50799236	393	*	Peak_15845	29	.	Distal Intergenic	17	50768650	50768730	81	1	102466918	ENST00000620427.1	30194	ENSG00000278672	MIR8059	microRNA 8059
chr17	50832713	50833064	352	*	Peak_2321	54	.	Promoter (1-2kb)	17	50834650	50841308	6659	1	124857	ENST00000426127.1	-1586	ENSG00000173714	WFIKKN2	WAP, follistatin/kazal, immunoglobulin, kunitz and netrin domain containing 2
chr17	51530419	51530795	377	*	Peak_18903	25	.	Distal Intergenic	17	51439653	51445802	6150	1	105371828	ENST00000588341.1	90766	NA	LINC02073	long intergenic non-protein coding RNA 2073
chr17	51634054	51634611	558	*	Peak_11251	34	.	Intron (ENST00000570565.5/56934, intron 7 of 8)	17	51661593	51747788	86196	2	56934	ENST00000575097.1	113177	ENSG00000154975	CA10	carbonic anhydrase 10
chr17	51910691	51911005	315	*	Peak_9246	37	.	Intron (ENST00000570565.5/56934, intron 3 of 8)	17	51635855	51748544	112690	2	56934	ENST00000571918.1	-162147	ENSG00000154975	CA10	carbonic anhydrase 10
chr17	51950153	51950709	557	*	Peak_16480	28	.	Intron (ENST00000570565.5/56934, intron 2 of 8)	17	51635855	51748544	112690	2	56934	ENST00000571918.1	-201609	ENSG00000154975	CA10	carbonic anhydrase 10
chr17	52560071	52560424	354	*	Peak_13064	34	.	Distal Intergenic	17	52390515	52535701	145187	1	105371830	ENST00000572848.1	169556	ENSG00000263317	LINC01982	long intergenic non-protein coding RNA 1982
chr17	5268119	5268385	267	*	Peak_11833	34	.	Distal Intergenic	17	5282265	5308802	26538	1	9135	ENST00000575991.1	-13880	ENSG00000029725	RABEP1	rabaptin, RAB GTPase binding effector protein 1
chr17	52930317	52930605	289	*	Peak_4042	47	.	Distal Intergenic	17	52985513	52987582	2070	1	100506650	ENST00000649605.1	-54908	ENSG00000227011	C17orf112	chromosome 17 open reading frame 112
chr17	53278833	53279077	245	*	Peak_5676	45	.	Intron (ENST00000650577.1/ENST00000650577.1, intron 6 of 6)	17	52985520	52987652	2133	1	100506650	ENST00000623702.1	293313	ENSG00000227011	C17orf112	chromosome 17 open reading frame 112
chr17	53361926	53362261	336	*	Peak_16063	29	.	Intron (ENST00000650577.1/ENST00000650577.1, intron 6 of 6)	17	52985520	52987652	2133	1	100506650	ENST00000623702.1	376406	ENSG00000227011	C17orf112	chromosome 17 open reading frame 112
chr17	53910854	53911369	516	*	Peak_2489	53	.	Intron (ENST00000650577.1/ENST00000650577.1, intron 3 of 6)	17	53822901	53825213	2313	1	84643	ENST00000268919.5	87953	ENSG00000141200	KIF2B	kinesin family member 2B
chr17	54268528	54268806	279	*	Peak_4537	46	.	Distal Intergenic	17	53822901	53825213	2313	1	84643	ENST00000268919.5	445627	ENSG00000141200	KIF2B	kinesin family member 2B
chr17	54346213	54346535	323	*	Peak_14506	31	.	Distal Intergenic	17	53822901	53825213	2313	1	84643	ENST00000268919.5	523312	ENSG00000141200	KIF2B	kinesin family member 2B
chr17	54389274	54389521	248	*	Peak_11835	34	.	Distal Intergenic	17	54899387	54937316	37930	1	10040	ENST00000570371.5	-509866	ENSG00000141198	TOM1L1	target of myb1 like 1 membrane trafficking protein
chr17	54793440	54793854	415	*	Peak_8287	40	.	Distal Intergenic	17	54899387	54937316	37930	1	10040	ENST00000570371.5	-105533	ENSG00000141198	TOM1L1	target of myb1 like 1 membrane trafficking protein
chr17	54876731	54877643	913	*	Peak_3319	49	.	Distal Intergenic	17	54899387	54937316	37930	1	10040	ENST00000570371.5	-21744	ENSG00000141198	TOM1L1	target of myb1 like 1 membrane trafficking protein
chr1	75520114	75520483	370	*	Peak_16486	28	.	Intron (ENST00000370859.7/204962, intron 2 of 23)	1	75204475	75611084	406610	2	204962	ENST00000370855.5	90601	ENSG00000137968	SLC44A5	solute carrier family 44 member 5
chr1	7552620	7552931	312	*	Peak_5625	45	.	Intron (ENST00000303635.11/23261, intron 6 of 22)	1	7382487	7389754	7268	2	102725193	ENST00000618051.1	-162866	ENSG00000237728	LOC102725193	uncharacterized LOC102725193
chr17	55493402	55493671	270	*	Peak_2131	55	.	Intron (ENST00000636752.1/ENST00000636752.1, intron 1 of 4)	17	55392613	55421992	29380	2	23531	ENST00000262065.7	-71410	ENSG00000108960	MMD	monocyte to macrophage differentiation associated
chr17	55561686	55562132	447	*	Peak_14095	32	.	Distal Intergenic	17	55392613	55421992	29380	2	23531	ENST00000262065.7	-139694	ENSG00000108960	MMD	monocyte to macrophage differentiation associated
chr17	55822394	55823125	732	*	Peak_10385	35	.	3' UTR	17	55773736	55823090	49355	1	58488	ENST00000572536.1	48658	ENSG00000141179	PCTP	phosphatidylcholine transfer protein
chr17	55845372	55845923	552	*	Peak_3896	47	.	Intron (ENST00000571972.1/ENST00000571972.1, intron 2 of 2)	17	55882301	56449186	566886	1	162282	ENST00000635860.1	-36378	ENSG00000153930	ANKFN1	ankyrin repeat and fibronectin type III domain containing 1
chr17	55847353	55847609	257	*	Peak_805	70	.	Intron (ENST00000571972.1/ENST00000571972.1, intron 2 of 2)	17	55882301	56449186	566886	1	162282	ENST00000635860.1	-34692	ENSG00000153930	ANKFN1	ankyrin repeat and fibronectin type III domain containing 1
chr17	55869636	55870058	423	*	Peak_7392	40	.	Intron (ENST00000571972.1/ENST00000571972.1, intron 1 of 2)	17	55882301	56449186	566886	1	162282	ENST00000635860.1	-12243	ENSG00000153930	ANKFN1	ankyrin repeat and fibronectin type III domain containing 1
chr17	55915866	55916251	386	*	Peak_6968	41	.	Intron (ENST00000635860.1/162282, intron 1 of 12)	17	55882301	56449186	566886	1	162282	ENST00000635860.1	33565	ENSG00000153930	ANKFN1	ankyrin repeat and fibronectin type III domain containing 1
chr17	55918390	55919075	686	*	Peak_19637	24	.	Intron (ENST00000635860.1/162282, intron 1 of 12)	17	55882301	56449186	566886	1	162282	ENST00000635860.1	36089	ENSG00000153930	ANKFN1	ankyrin repeat and fibronectin type III domain containing 1
chr17	55961730	55962061	332	*	Peak_2014	57	.	Intron (ENST00000635860.1/162282, intron 2 of 12)	17	55882301	56449186	566886	1	162282	ENST00000635860.1	79429	ENSG00000153930	ANKFN1	ankyrin repeat and fibronectin type III domain containing 1
chr17	55992119	55992375	257	*	Peak_2490	53	.	Intron (ENST00000635860.1/162282, intron 3 of 12)	17	55882301	56449186	566886	1	162282	ENST00000635860.1	109818	ENSG00000153930	ANKFN1	ankyrin repeat and fibronectin type III domain containing 1
chr17	56117618	56117999	382	*	Peak_17557	27	.	Intron (ENST00000635860.1/162282, intron 4 of 12)	17	56110958	56228550	117593	1	162282	ENST00000575594.1	6660	ENSG00000153930	ANKFN1	ankyrin repeat and fibronectin type III domain containing 1
chr17	56554787	56555205	419	*	Peak_1977	57	.	Distal Intergenic	17	56593699	56595590	1892	1	9241	ENST00000332822.4	-38494	ENSG00000183691	NOG	noggin
chr17	57006922	57007226	305	*	Peak_14222	31	.	Distal Intergenic	17	56998291	57006586	8296	1	59342	ENST00000570479.1	8631	ENSG00000121064	SCPEP1	serine carboxypeptidase 1
chr17	57045790	57046034	245	*	Peak_3535	48	.	Promoter (<=1kb)	17	57045521	57046445	925	1	376412	ENST00000569893.1	269	ENSG00000261192	RNF126P1	ring finger protein 126 pseudogene 1
chr17	57200567	57201011	445	*	Peak_13321	33	.	Intron (ENST00000649027.1/ENST00000649027.1, intron 1 of 1)	17	57255851	57680121	424271	1	124540	ENST00000416426.6	-54840	ENSG00000153944	MSI2	musashi RNA binding protein 2
chr17	57472262	57472641	380	*	Peak_8622	39	.	Intron (ENST00000416426.6/124540, intron 6 of 13)	17	57444487	57596950	152464	1	124540	ENST00000582772.1	27775	ENSG00000153944	MSI2	musashi RNA binding protein 2
chr17	57494490	57495044	555	*	Peak_2950	52	.	Intron (ENST00000416426.6/124540, intron 6 of 13)	17	57522248	57523597	1350	2	101927557	ENST00000577189.1	28553	ENSG00000266100	LOC101927557	uncharacterized LOC101927557
chr17	57608531	57608860	330	*	Peak_19825	24	.	Promoter (<=1kb)	17	57600856	57608412	7557	2	101927539	ENST00000578662.1	-119	ENSG00000263499	LOC101927539	uncharacterized LOC101927539
chr17	57715177	57715790	614	*	Peak_9463	37	.	Distal Intergenic	17	57744481	57745312	832	2	101927581	ENST00000299415.2	29522	ENSG00000166329	CCDC182	coiled-coil domain containing 182
chr17	57766691	57766952	262	*	Peak_9957	36	.	Distal Intergenic	17	57744481	57745312	832	2	101927581	ENST00000299415.2	-21379	ENSG00000166329	CCDC182	coiled-coil domain containing 182
chr17	58194576	58195272	697	*	Peak_9958	36	.	Promoter (1-2kb)	17	58192737	58205174	12438	1	8288	ENST00000225371.5	1839	ENSG00000121053	EPX	eosinophil peroxidase
chr17	58198673	58199331	659	*	Peak_7138	41	.	Exon (ENST00000225371.5/8288, exon 8 of 13)	17	58192737	58205174	12438	1	8288	ENST00000225371.5	5936	ENSG00000121053	EPX	eosinophil peroxidase
chr17	58206000	58206713	714	*	Peak_8889	38	.	Promoter (<=1kb)	17	58205888	58206780	893	2	54903	ENST00000583577.1	67	ENSG00000011143	MKS1	MKS transition zone complex subunit 1
chr17	58278444	58278794	351	*	Peak_17956	26	.	Promoter (<=1kb)	17	58275571	58278119	2549	2	4353	ENST00000578493.1	-325	ENSG00000005381	MPO	myeloperoxidase
chr17	58460015	58460820	806	*	Peak_10623	35	.	Intron (ENST00000323777.7/124535, intron 4 of 5)	17	58420167	58488384	68218	2	124535	ENST00000323777.7	27564	ENSG00000176160	HSF5	heat shock transcription factor 5
chr17	58464340	58464736	397	*	Peak_13185	33	.	Intron (ENST00000323777.7/124535, intron 3 of 5)	17	58420167	58488384	68218	2	124535	ENST00000323777.7	23648	ENSG00000176160	HSF5	heat shock transcription factor 5
chr17	58740078	58740307	230	*	Peak_11839	34	.	Distal Intergenic	17	58732332	58734331	2000	1	5889	ENST00000461706.1	7746	ENSG00000108384	RAD51C	RAD51 paralog C
chr17	58952199	58952604	406	*	Peak_11840	34	.	Intron (ENST00000308249.3/22843, intron 1 of 6)	17	58982651	59012407	29757	2	4591	ENST00000583945.5	59803	ENSG00000108395	TRIM37	tripartite motif containing 37
chr17	59396928	59397357	430	*	Peak_20268	22	.	3' UTR	17	59388840	59397149	8310	1	388403	ENST00000582813.1	8088	ENSG00000175155	YPEL2	yippee like 2
chr17	59545106	59545430	325	*	Peak_1669	60	.	Distal Intergenic	17	59430869	59526946	96078	2	101927728	ENST00000584262.5	-18160	ENSG00000265313	LINC01476	long intergenic non-protein coding RNA 1476
chr17	59839842	59840337	496	*	Peak_2101	56	.	Promoter (<=1kb)	17	59841266	59841337	72	1	406991	ENST00000362134.1	-929	ENSG00000284190	MIR21	microRNA 21
chr1	75984003	75984319	317	*	Peak_2015	57	.	Intron (ENST00000635455.1/101927342, intron 3 of 7)	1	76003026	76019350	16325	1	101927342	ENST00000436121.2	-18707	NA	LOC101927342	uncharacterized LOC101927342
chr17	60360003	60360232	230	*	Peak_7002	41	.	Intron (ENST00000300896.8/84669, intron 1 of 33)	17	60301450	60391928	90479	2	84669	ENST00000589761.1	31696	ENSG00000170832	USP32	ubiquitin specific peptidase 32
chr17	60708736	60709098	363	*	Peak_19691	24	.	Intron (ENST00000588168.5/54828, intron 4 of 5)	17	60679458	61392831	713374	1	54828	ENST00000588462.5	29278	ENSG00000141376	BCAS3	BCAS3 microtubule associated cell migration factor
chr17	60843159	60843781	623	*	Peak_14175	32	.	Intron (ENST00000589222.5/54828, intron 7 of 25)	17	60886383	60947253	60871	1	54828	ENST00000586705.5	-42602	ENSG00000141376	BCAS3	BCAS3 microtubule associated cell migration factor
chr1	7608857	7609374	518	*	Peak_16487	28	.	Intron (ENST00000303635.11/23261, intron 6 of 22)	1	7736408	7767856	31449	1	23261	ENST00000495233.5	-127034	ENSG00000171735	CAMTA1	calmodulin binding transcription activator 1
chr17	61493100	61493361	262	*	Peak_6327	42	.	Distal Intergenic	17	61478363	61481346	2984	1	9496	ENST00000586874.2	14737	ENSG00000121075	TBX4	T-box 4
chr17	62712043	62712394	352	*	Peak_5715	44	.	Intron (ENST00000584597.1/105371855, intron 1 of 1)	17	62706333	62736534	30202	1	105371855	ENST00000579201.1	5710	ENSG00000265702	LOC105371855	uncharacterized LOC105371855
chr17	62736516	62736758	243	*	Peak_14509	31	.	Exon (ENST00000582564.1/105371855, exon 3 of 3)	17	62701314	62744514	43201	2	162333	ENST00000580520.5	7756	ENSG00000173838	2022-03-10	membrane associated ring-CH-type finger 10
chr17	62760715	62760999	285	*	Peak_9359	37	.	Promoter (<=1kb)	17	62749976	62759991	10016	2	162333	ENST00000582568.1	-724	ENSG00000173838	2022-03-10	membrane associated ring-CH-type finger 10
chr17	62873175	62873426	252	*	Peak_6403	42	.	Distal Intergenic	17	62808500	62836371	27872	1	101927877	ENST00000584542.1	64675	ENSG00000265000	LOC101927877	uncharacterized LOC101927877
chr17	62881601	62881902	302	*	Peak_315	92	.	Distal Intergenic	17	62944215	62944312	98	1	693218	ENST00000384821.1	-62313	ENSG00000207552	MIR633	microRNA 633
chr1	76327352	76327758	407	*	Peak_4540	46	.	Intron (ENST00000328299.3/256435, intron 2 of 4)	1	76313913	76577209	263297	1	256435	ENST00000464140.1	13439	ENSG00000184005	ST6GALNAC3	ST6 N-acetylgalactosaminide alpha-2,6-sialyltransferase 3
chr17	63877073	63877374	302	*	Peak_1472	60	.	Downstream (2-3kb)	17	63872012	63873766	1755	2	1443	ENST00000560142.5	-3307	ENSG00000213218	CSH2	chorionic somatomammotropin hormone 2
chr17	64219673	64219949	277	*	Peak_7272	41	.	Intron (ENST00000258991.7/55852, intron 1 of 11)	17	64148883	64212719	63837	2	55852	ENST00000583501.1	-6954	ENSG00000136478	TEX2	testis expressed 2
chr17	6428372	6428631	260	*	Peak_11841	34	.	3' UTR	17	6393693	6435079	41387	2	23746	ENST00000570584.5	6448	ENSG00000129221	AIPL1	aryl hydrocarbon receptor interacting protein like 1
chr17	64936151	64936596	446	*	Peak_8382	39	.	Exon (ENST00000578601.2/ENST00000578601.2, exon 2 of 2)	17	64860852	64919480	58629	2	374819	ENST00000581368.5	-16671	ENSG00000176809	LRRC37A3	leucine rich repeat containing 37 member A3
chr17	65140602	65141161	560	*	Peak_10628	35	.	Intron (ENST00000635833.1/8787, intron 1 of 18)	17	65137592	65180037	42446	1	8787	ENST00000577186.1	3010	ENSG00000108370	RGS9	regulator of G protein signaling 9
chr17	65144258	65144895	638	*	Peak_7141	41	.	Intron (ENST00000635833.1/8787, intron 1 of 18)	17	65137592	65180037	42446	1	8787	ENST00000577186.1	6666	ENSG00000108370	RGS9	regulator of G protein signaling 9
chr17	65284382	65284734	353	*	Peak_708	73	.	Distal Intergenic	17	65188704	65227692	38989	1	8787	ENST00000577595.1	95678	ENSG00000108370	RGS9	regulator of G protein signaling 9
chr17	6542679	6542944	266	*	Peak_3332	49	.	Intron (ENST00000421306.7/83394, intron 1 of 18)	17	6451264	6556460	105197	2	83394	ENST00000421306.7	13516	ENSG00000091622	PITPNM3	PITPNM family member 3
chr17	65554419	65554801	383	*	Peak_19694	24	.	Intron (ENST00000307078.9/8313, intron 2 of 10)	17	65529881	65558729	28849	2	8313	ENST00000375702.5	3928	ENSG00000168646	AXIN2	axin 2
chr17	65603634	65603875	242	*	Peak_8331	40	.	Intron (ENST00000577662.1/8313, intron 3 of 6)	17	65636614	65641025	4412	2	201134	ENST00000585168.1	37150	ENSG00000154240	CEP112	centrosomal protein 112
chr17	65755025	65755488	464	*	Peak_4542	46	.	Intron (ENST00000535342.6/201134, intron 21 of 26)	17	65743115	65751104	7990	2	201134	ENST00000582760.1	-3921	ENSG00000154240	CEP112	centrosomal protein 112
chr17	65864177	65864629	453	*	Peak_1806	58	.	Intron (ENST00000535342.6/201134, intron 20 of 26)	17	65688230	65873648	185419	2	201134	ENST00000580482.5	9019	ENSG00000154240	CEP112	centrosomal protein 112
chr17	66225816	66226100	285	*	Peak_1965	57	.	Promoter (2-3kb)	17	66216791	66228637	11847	2	350	ENST00000581797.5	2537	ENSG00000091583	APOH	apolipoprotein H
chr1	7662594	7662871	278	*	Peak_13215	33	.	Intron (ENST00000303635.11/23261, intron 8 of 22)	1	7736408	7767856	31449	1	23261	ENST00000495233.5	-73537	ENSG00000171735	CAMTA1	calmodulin binding transcription activator 1
chr1	7663982	7664369	388	*	Peak_16042	29	.	Exon (ENST00000303635.11/23261, exon 9 of 23)	1	7736408	7767856	31449	1	23261	ENST00000495233.5	-72039	ENSG00000171735	CAMTA1	calmodulin binding transcription activator 1
chr17	66883047	66883691	645	*	Peak_5574	45	.	Intron (ENST00000533854.5/27091, intron 4 of 5)	17	66877273	66885278	8006	1	27091	ENST00000307139.4	5774	ENSG00000075429	CACNG5	calcium voltage-gated channel auxiliary subunit gamma 5
chr17	67042237	67042634	398	*	Peak_6404	42	.	Promoter (1-2kb)	17	67044590	67056797	12208	1	786	ENST00000226021.4	-1956	ENSG00000108878	CACNG1	calcium voltage-gated channel auxiliary subunit gamma 1
chr17	6713448	6713932	485	*	Peak_4544	46	.	Promoter (<=1kb)	17	6684713	6713567	28855	2	284111	ENST00000433363.6	0	ENSG00000141485	SLC13A5	solute carrier family 13 member 5
chr17	67448322	67448900	579	*	Peak_3435	49	.	Intron (ENST00000299954.13/26207, intron 1 of 8)	17	67457538	67578256	120719	1	26207	ENST00000584554.1	-8638	ENSG00000154217	PITPNC1	phosphatidylinositol transfer protein cytoplasmic 1
chr17	67662256	67662679	424	*	Peak_2124	55	.	Intron (ENST00000299954.13/26207, intron 5 of 8)	17	67717833	67744531	26699	1	25926	ENST00000253247.8	-55154	ENSG00000130935	NOL11	nucleolar protein 11
chr17	67759434	67759694	261	*	Peak_2870	52	.	Distal Intergenic	17	67743384	67744151	768	1	25926	ENST00000584032.1	16050	ENSG00000130935	NOL11	nucleolar protein 11
chr17	67764568	67764878	311	*	Peak_17962	26	.	Distal Intergenic	17	67743384	67744151	768	1	25926	ENST00000584032.1	21184	ENSG00000130935	NOL11	nucleolar protein 11
chr17	67773448	67773762	315	*	Peak_18917	25	.	Distal Intergenic	17	67743384	67744151	768	1	25926	ENST00000584032.1	30064	ENSG00000130935	NOL11	nucleolar protein 11
chr17	67817389	67817618	230	*	Peak_10629	35	.	Distal Intergenic	17	67825524	67945891	120368	1	2186	ENST00000544778.6	-7906	ENSG00000171634	BPTF	bromodomain PHD finger transcription factor
chr17	67822782	67823175	394	*	Peak_14035	32	.	Promoter (2-3kb)	17	67825524	67945891	120368	1	2186	ENST00000544778.6	-2349	ENSG00000171634	BPTF	bromodomain PHD finger transcription factor
chr17	68254929	68255270	342	*	Peak_8867	38	.	Intron (ENST00000359904.7/51321, intron 5 of 6)	17	68251286	68257155	5870	1	51321	ENST00000581779.1	3643	ENSG00000196704	AMZ2	archaelysin family metallopeptidase 2
chr17	68286963	68287272	310	*	Peak_1982	57	.	Intron (ENST00000448504.6/22901, intron 1 of 11)	17	68267026	68291116	24091	2	9120	ENST00000327268.8	3844	ENSG00000108932	SLC16A6	solute carrier family 16 member 6
chr17	68505149	68505691	543	*	Peak_11101	35	.	Intron (ENST00000590353.1/5573, intron 1 of 5)	17	68511780	68525818	14039	1	5573	ENST00000589017.5	-6089	ENSG00000108946	PRKAR1A	protein kinase cAMP-dependent type I regulatory subunit alpha
chr17	68563258	68563626	369	*	Peak_9791	36	.	Intron (ENST00000589826.1/ENST00000589826.1, intron 1 of 2)	17	68535113	68558390	23278	2	54757	ENST00000226094.9	-4868	ENSG00000108950	FAM20A	FAM20A golgi associated secretory pathway pseudokinase
chr17	68676300	68676737	438	*	Peak_17266	28	.	Intron (ENST00000587999.1/ENST00000587999.1, intron 2 of 2)	17	68628154	68679606	51453	1	101928104	ENST00000585484.1	48146	ENSG00000267659	LINC01482	long intergenic non-protein coding RNA 1482
chr17	68855901	68856474	574	*	Peak_13065	34	.	Distal Intergenic	17	68876314	68877646	1333	2	10351	ENST00000588458.1	21172	ENSG00000141338	ABCA8	ATP binding cassette subfamily A member 8
chr17	69440027	69440280	254	*	Peak_3294	50	.	Intron (ENST00000590474.6/5608, intron 1 of 11)	17	69414834	69542510	127677	1	5608	ENST00000359094.7	25193	ENSG00000108984	MAP2K6	mitogen-activated protein kinase kinase 6
chr17	69443193	69443441	249	*	Peak_5932	44	.	Intron (ENST00000590474.6/5608, intron 1 of 11)	17	69414834	69542510	127677	1	5608	ENST00000359094.7	28359	ENSG00000108984	MAP2K6	mitogen-activated protein kinase kinase 6
chr17	69564802	69565138	337	*	Peak_10633	35	.	Distal Intergenic	17	69577251	69624734	47484	1	101928122	ENST00000588501.5	-12113	ENSG00000227517	LINC01483	long intergenic non-protein coding RNA 1483
chr17	69842474	69842783	310	*	Peak_11845	34	.	Intron (ENST00000591334.5/101928122, intron 3 of 5)	17	69763677	69903000	139324	1	101928122	ENST00000587241.1	78797	ENSG00000227517	LINC01483	long intergenic non-protein coding RNA 1483
chr17	70053879	70054165	287	*	Peak_3731	47	.	Promoter (<=1kb)	17	70053429	70132193	78765	1	3773	ENST00000591891.5	450	ENSG00000153822	KCNJ16	potassium voltage-gated channel subfamily J member 16
chr17	70061829	70062058	230	*	Peak_7696	40	.	Intron (ENST00000586373.1/101928141, intron 1 of 1)	17	70053429	70132193	78765	1	3773	ENST00000591891.5	8400	ENSG00000153822	KCNJ16	potassium voltage-gated channel subfamily J member 16
chr17	70282227	70282592	366	*	Peak_9247	37	.	Distal Intergenic	17	70169535	70180048	10514	1	3759	ENST00000243457.3	112692	ENSG00000123700	KCNJ2	potassium voltage-gated channel subfamily J member 2
chr17	70433485	70433786	302	*	Peak_3607	48	.	Distal Intergenic	17	70169535	70180048	10514	1	3759	ENST00000243457.3	263950	ENSG00000123700	KCNJ2	potassium voltage-gated channel subfamily J member 2
chr17	70438188	70438491	304	*	Peak_18920	25	.	Distal Intergenic	17	70169535	70180048	10514	1	3759	ENST00000243457.3	268653	ENSG00000123700	KCNJ2	potassium voltage-gated channel subfamily J member 2
chr17	7109031	7109265	235	*	Peak_4546	46	.	Intron (ENST00000355035.9/433, intron 2 of 8)	17	7101575	7114240	12666	2	433	ENST00000446679.6	4975	ENSG00000161944	ASGR2	asialoglycoprotein receptor 2
chr17	71824565	71824855	291	*	Peak_4548	46	.	Distal Intergenic	17	72030291	72036316	6026	1	102606463	ENST00000538693.1	-205436	ENSG00000256124	LINC01152	long intergenic non-protein coding RNA 1152
chr17	72094801	72095207	407	*	Peak_9792	36	.	Intron (ENST00000602213.5/400618, intron 1 of 5)	17	72081921	72089120	7200	2	400618	ENST00000533039.2	-5681	ENSG00000234899	SOX9-AS1	SOX9 antisense RNA 1
chr17	72153631	72153936	306	*	Peak_9206	38	.	Intron (ENST00000628742.2/400618, intron 2 of 6)	17	72040732	72173583	132852	2	400618	ENST00000628742.2	19647	ENSG00000234899	SOX9-AS1	SOX9 antisense RNA 1
chr17	72237537	72237886	350	*	Peak_2233	54	.	Distal Intergenic	17	72040732	72173583	132852	2	400618	ENST00000628742.2	-63954	ENSG00000234899	SOX9-AS1	SOX9 antisense RNA 1
chr17	72740919	72741302	384	*	Peak_11102	35	.	Intron (ENST00000255559.7/201266, intron 6 of 9)	17	72647109	72725614	78506	2	201266	ENST00000579988.1	-15305	ENSG00000133195	SLC39A11	solute carrier family 39 member 11
chr17	72755507	72755801	295	*	Peak_10636	35	.	Intron (ENST00000255559.7/201266, intron 6 of 9)	17	72647109	72725614	78506	2	201266	ENST00000579988.1	-29893	ENSG00000133195	SLC39A11	solute carrier family 39 member 11
chr17	73029906	73030252	347	*	Peak_10637	35	.	Intron (ENST00000255559.7/201266, intron 4 of 9)	17	72823607	72992949	169343	2	201266	ENST00000579491.1	-36957	ENSG00000133195	SLC39A11	solute carrier family 39 member 11
chr17	73446234	73446662	429	*	Peak_4549	46	.	Intron (ENST00000392650.7/54549, intron 5 of 44)	17	73357370	73437769	80400	2	54549	ENST00000479356.1	-8465	ENSG00000069188	SDK2	sidekick cell adhesion molecule 2
chr1	7736113	7736585	473	*	Peak_8716	39	.	Promoter (<=1kb)	1	7736408	7767856	31449	1	23261	ENST00000495233.5	0	ENSG00000171735	CAMTA1	calmodulin binding transcription activator 1
chr1	77396644	77397020	377	*	Peak_13837	32	.	Intron (ENST00000354567.6/26289, intron 6 of 13)	1	77417693	77558729	141037	1	26289	ENST00000527263.1	-20673	ENSG00000154027	AK5	adenylate kinase 5
chr17	74359564	74359938	375	*	Peak_9089	38	.	Promoter (2-3kb)	17	74356416	74361946	5531	2	388419	ENST00000375366.3	2008	ENSG00000204347	BTBD17	BTB domain containing 17
chr17	74466148	74466802	655	*	Peak_3401	49	.	Promoter (<=1kb)	17	74466399	74484794	18396	1	11314	ENST00000648095.1	0	ENSG00000167851	CD300A	CD300a molecule
chr17	74627832	74628065	234	*	Peak_11848	34	.	Distal Intergenic	17	74609887	74623738	13852	2	342510	ENST00000392619.1	-4094	ENSG00000186407	CD300E	CD300e molecule
chr17	75551488	75552130	643	*	Peak_145	124	.	Intron (ENST00000580578.5/3993, intron 2 of 5)	17	75546148	75559345	13198	1	3993	ENST00000583658.1	5340	ENSG00000073350	LLGL2	LLGL scribble cell polarity complex component 2
chr17	76222770	76223199	430	*	Peak_18235	26	.	Intron (ENST00000269391.10/114804, intron 1 of 18)	17	76142465	76240289	97825	2	114804	ENST00000647930.1	17090	ENSG00000141576	RNF157	ring finger protein 157
chr17	76329215	76329755	541	*	Peak_12949	34	.	Promoter (<=1kb)	17	76313601	76328986	15386	2	5635	ENST00000472686.1	-229	ENSG00000161542	PRPSAP1	phosphoribosyl pyrophosphate synthetase associated protein 1
chr17	7651393	7651914	522	*	Peak_14510	31	.	Promoter (<=1kb)	17	7651112	7657768	6657	1	482	ENST00000250111.8	281	ENSG00000129244	ATP1B2	ATPase Na+/K+ transporting subunit beta 2
chr17	76586002	76586266	265	*	Peak_19866	24	.	Promoter (<=1kb)	17	76565379	76586128	20750	2	10610	ENST00000225276.9	0	ENSG00000070731	ST6GALNAC2	ST6 N-acetylgalactosaminide alpha-2,6-sialyltransferase 2
chr17	77081776	77082399	624	*	Peak_16226	28	.	Distal Intergenic	17	77086716	77093762	7047	1	654434	ENST00000568363.5	-4317	ENSG00000234912	SNHG20	small nucleolar RNA host gene 20
chr17	7759434	7759714	281	*	Peak_4551	46	.	Promoter (1-2kb)	17	7760744	7787750	27007	1	146754	ENST00000574518.1	-1030	ENSG00000183914	DNAH2	dynein axonemal heavy chain 2
chr17	7760116	7760345	230	*	Peak_11849	34	.	Promoter (<=1kb)	17	7760744	7787750	27007	1	146754	ENST00000574518.1	-399	ENSG00000183914	DNAH2	dynein axonemal heavy chain 2
chr17	77737844	77738222	379	*	Peak_5358	46	.	Distal Intergenic	17	77722872	77728559	5688	2	100132174	ENST00000593118.1	-9285	ENSG00000267790	LINC01987	long intergenic non-protein coding RNA 1987
chr17	77909991	77910431	441	*	Peak_3333	49	.	Distal Intergenic	17	77879027	77884087	5061	2	400624	ENST00000374983.3	-25904	ENSG00000204283	LINC01973	long intergenic non-protein coding RNA 1973
chr17	7799054	7799564	511	*	Peak_5641	45	.	Exon (ENST00000572933.5/146754, exon 56 of 86)	17	7804320	7831678	27359	1	146754	ENST00000575105.1	-4756	ENSG00000183914	DNAH2	dynein axonemal heavy chain 2
chr1	77819763	77820097	335	*	Peak_18498	26	.	Intron (ENST00000370791.7/374986, intron 7 of 15)	1	77803389	77862215	58827	1	374986	ENST00000476203.2	16374	ENSG00000180488	MIGA1	mitoguardin 1
chr17	78462528	78462862	335	*	Peak_5575	45	.	Exon (ENST00000591369.5/8632, exon 4 of 28)	17	78451496	78458888	7393	2	8632	ENST00000592152.1	-3640	ENSG00000187775	DNAH17	dynein axonemal heavy chain 17
chr17	78542316	78542697	382	*	Peak_400	86	.	Intron (ENST00000389840.6/8632, intron 17 of 80)	17	78543755	78571322	27568	2	8632	ENST00000589793.1	28625	ENSG00000187775	DNAH17	dynein axonemal heavy chain 17
chr17	78612546	78612883	338	*	Peak_3080	51	.	Intron (ENST00000648396.1/101928710, intron 4 of 4)	17	78617388	78618562	1175	2	101928710	ENST00000647847.1	5679	ENSG00000267123	SCAT1	S-phase cancer associated transcript 1
chr17	78724264	78724664	401	*	Peak_16997	28	.	Promoter (<=1kb)	17	78701672	78724046	22375	2	9267	ENST00000590300.1	-218	ENSG00000108669	CYTH1	cytohesin 1
chr17	79184265	79184724	460	*	Peak_18270	26	.	Promoter (<=1kb)	17	79115698	79183472	67775	2	146713	ENST00000580508.1	-793	ENSG00000167281	RBFOX3	RNA binding fox-1 homolog 3
chr17	79514756	79515385	630	*	Peak_10641	35	.	Promoter (<=1kb)	17	79090816	79516148	425333	2	146713	ENST00000580155.5	763	ENSG00000167281	RBFOX3	RNA binding fox-1 homolog 3
chr17	79679655	79680161	507	*	Peak_3228	50	.	Distal Intergenic	17	79707176	79707249	74	2	100616170	ENST00000577633.1	27088	ENSG00000266665	MIR4739	microRNA 4739
chr17	79763032	79763338	307	*	Peak_9143	38	.	Distal Intergenic	17	79778132	79787983	9852	1	84733	ENST00000310942.8	-14794	ENSG00000173894	CBX2	chromobox 2
chr17	79888920	79889149	230	*	Peak_5390	46	.	Distal Intergenic	17	79919357	79924010	4654	1	101928738	ENST00000574526.1	-30208	ENSG00000262188	LINC01978	long intergenic non-protein coding RNA 1978
chr17	80116637	80116932	296	*	Peak_2837	52	.	Promoter (<=1kb)	17	80116826	80119275	2450	1	2548	ENST00000573556.1	0	ENSG00000171298	GAA	glucosidase alpha, acid
chr17	8034558	8034815	258	*	Peak_1942	57	.	Distal Intergenic	17	8039017	8049134	10118	1	247	ENST00000380183.8	-4202	ENSG00000179593	ALOX15B	arachidonate 15-lipoxygenase type B
chr17	80380360	80380954	595	*	Peak_3703	47	.	Promoter (<=1kb)	17	80379456	80380891	1436	1	57674	ENST00000572622.1	904	ENSG00000173821	RNF213	ring finger protein 213
chr17	80498825	80499130	306	*	Peak_3778	47	.	Distal Intergenic	17	80473414	80477843	4430	2	4884	ENST00000575212.1	-20982	ENSG00000171246	NPTX1	neuronal pentraxin 1
chr17	80679007	80679480	474	*	Peak_14622	31	.	Intron (ENST00000574767.5/57521, intron 2 of 11)	17	80708933	80754104	45172	1	57521	ENST00000572733.1	-29453	ENSG00000141564	RPTOR	regulatory associated protein of MTOR complex 1
chr17	80767067	80767374	308	*	Peak_3013	51	.	Intron (ENST00000574767.5/57521, intron 5 of 11)	17	80743287	80966371	223085	1	57521	ENST00000575542.5	23780	ENSG00000141564	RPTOR	regulatory associated protein of MTOR complex 1
chr17	80920274	80920510	237	*	Peak_7344	40	.	Promoter (2-3kb)	17	80922724	80924172	1449	1	57521	ENST00000576366.1	-2214	ENSG00000141564	RPTOR	regulatory associated protein of MTOR complex 1
chr17	80925327	80926008	682	*	Peak_3036	51	.	Promoter (2-3kb)	17	80922724	80924172	1449	1	57521	ENST00000576366.1	2603	ENSG00000141564	RPTOR	regulatory associated protein of MTOR complex 1
chr17	80926761	80926990	230	*	Peak_10642	35	.	Intron (ENST00000306801.7/57521, intron 24 of 33)	17	80922724	80924172	1449	1	57521	ENST00000576366.1	4037	ENSG00000141564	RPTOR	regulatory associated protein of MTOR complex 1
chr17	81688685	81689145	461	*	Peak_1762	59	.	Promoter (2-3kb)	17	81686267	81690830	4564	1	9146	ENST00000576087.1	2418	ENSG00000185359	HGS	hepatocyte growth factor-regulated tyrosine kinase substrate
chr17	81984424	81984833	410	*	Peak_8432	39	.	Intron (ENST00000581484.5/79058, intron 3 of 6)	17	81978186	82017406	39221	1	79058	ENST00000584454.5	6238	ENSG00000169696	ASPSCR1	ASPSCR1 tether for SLC2A4, UBX domain containing
chr17	82248410	82249136	727	*	Peak_10234	35	.	Promoter (<=1kb)	17	82239023	82248980	9958	2	1453	ENST00000584672.1	0	ENSG00000141551	CSNK1D	casein kinase 1 delta
chr17	82250036	82250383	348	*	Peak_6172	43	.	Promoter (<=1kb)	17	82246318	82249835	3518	2	1453	ENST00000580565.1	-201	ENSG00000141551	CSNK1D	casein kinase 1 delta
chr17	82582109	82582617	509	*	Peak_15359	30	.	Promoter (<=1kb)	17	82582775	82586043	3269	1	3607	ENST00000571160.1	-158	ENSG00000141568	FOXK2	forkhead box K2
chr1	78258654	78258883	230	*	Peak_14176	32	.	Intron (ENST00000436742.5/149047, intron 3 of 5)	1	78229622	78369464	139843	1	149047	ENST00000413519.1	29032	ENSG00000237413	MGC27382	uncharacterized MGC27382
chr17	82710870	82711451	582	*	Peak_14512	31	.	Downstream (2-3kb)	17	82713908	82716255	2348	2	101929552	ENST00000574471.1	4804	ENSG00000263063	LOC101929552	uncharacterized LOC101929552
chr17	82789255	82789882	628	*	Peak_20136	22	.	Intron (ENST00000355528.8/6904, intron 7 of 38)	17	82752158	82942709	190552	1	6904	ENST00000539345.6	37097	ENSG00000141556	TBCD	tubulin folding cofactor D
chr17	82845057	82845596	540	*	Peak_31	206	.	Intron (ENST00000355528.8/6904, intron 13 of 38)	17	82829435	82840578	11144	2	79755	ENST00000269394.3	-4479	ENSG00000141579	ZNF750	zinc finger protein 750
chr17	83056958	83057359	402	*	Peak_17965	26	.	Distal Intergenic	17	82943791	83051810	108020	2	146712	ENST00000320865.3	-5148	ENSG00000175711	B3GNTL1	UDP-GlcNAc:betaGal beta-1,3-N-acetylglucosaminyltransferase like 1
chr17	8419903	8420346	444	*	Peak_7292	40	.	Intron (ENST00000582812.5/81565, intron 1 of 4)	17	8413195	8446884	33690	1	81565	ENST00000580237.5	6708	ENSG00000166579	NDEL1	nudE neurodevelopment protein 1 like 1
chr17	850904	851235	332	*	Peak_13711	32	.	Intron (ENST00000575801.5/64359, intron 1 of 7)	17	800768	864097	63330	2	64359	ENST00000537628.6	12862	ENSG00000167693	NXN	nucleoredoxin
chr1	7856177	7856572	396	*	Peak_6610	42	.	Promoter (2-3kb)	1	7843083	7853512	10430	2	10911	ENST00000377516.6	-2665	ENSG00000049247	UTS2	urotensin 2
chr1	78653764	78653993	230	*	Peak_14403	31	.	Intron (ENST00000470323.5/10561, intron 1 of 6)	1	78649858	78664078	14221	1	10561	ENST00000472152.5	3906	ENSG00000137965	IFI44	interferon induced protein 44
chr17	8775053	8775364	312	*	Peak_4553	46	.	Distal Intergenic	17	8753106	8758559	5454	2	388333	ENST00000582989.1	-16494	ENSG00000183318	SPDYE4	speedy/RINGO cell cycle regulator family member E4
chr17	8849915	8850163	249	*	Peak_4554	46	.	Promoter (<=1kb)	17	8803273	8849794	46522	2	146850	ENST00000614407.1	-121	ENSG00000276231	PIK3R6	phosphoinositide-3-kinase regulatory subunit 6
chr1	79029805	79030088	284	*	Peak_13863	32	.	Distal Intergenic	1	78889764	79006718	116955	2	64123	ENST00000370742.3	-23087	ENSG00000162618	ADGRL4	adhesion G protein-coupled receptor L4
chr1	80169337	80169667	331	*	Peak_7705	40	.	Distal Intergenic	1	80535755	80646788	111034	1	101927412	ENST00000418041.5	-366088	ENSG00000234184	LINC01781	long intergenic non-protein coding RNA 1781
chr1	80289627	80289916	290	*	Peak_7706	40	.	Distal Intergenic	1	80535755	80646788	111034	1	101927412	ENST00000418041.5	-245839	ENSG00000234184	LINC01781	long intergenic non-protein coding RNA 1781
chr18	10428425	10428944	520	*	Peak_9363	37	.	Distal Intergenic	18	10405133	10414370	9238	2	101927350	ENST00000567609.1	-14055	ENSG00000260913	LINC01254	long intergenic non-protein coding RNA 1254
chr18	10453644	10454228	585	*	Peak_1327	60	.	Promoter (<=1kb)	18	10454628	10489948	35321	1	147495	ENST00000355285.9	-400	ENSG00000154856	APCDD1	APC down-regulated 1
chr18	10476275	10476578	304	*	Peak_8468	39	.	3' UTR	18	10472007	10487814	15808	1	147495	ENST00000579685.1	4268	ENSG00000154856	APCDD1	APC down-regulated 1
chr18	10478146	10478612	467	*	Peak_8601	39	.	Intron (ENST00000355285.9/147495, intron 3 of 4)	18	10472007	10487814	15808	1	147495	ENST00000579685.1	6139	ENSG00000154856	APCDD1	APC down-regulated 1
chr18	10658401	10658801	401	*	Peak_913	67	.	Distal Intergenic	18	10661933	10666887	4955	1	101927410	ENST00000562202.1	-3132	ENSG00000260779	LOC101927410	uncharacterized LOC101927410
chr18	11145870	11146283	414	*	Peak_11299	34	.	Promoter (2-3kb)	18	10670241	11148588	478348	2	63895	ENST00000302079.10	2305	ENSG00000154864	PIEZO2	piezo type mechanosensitive ion channel component 2
chr18	11236649	11236943	295	*	Peak_13965	32	.	Distal Intergenic	18	10670248	11148762	478515	2	63895	ENST00000383408.6	-87887	ENSG00000154864	PIEZO2	piezo type mechanosensitive ion channel component 2
chr18	11291541	11291955	415	*	Peak_17533	27	.	Distal Intergenic	18	10670248	11148762	478515	2	63895	ENST00000383408.6	-142779	ENSG00000154864	PIEZO2	piezo type mechanosensitive ion channel component 2
chr18	11929877	11930136	260	*	Peak_6859	41	.	Distal Intergenic	18	11882622	11909223	26602	2	65258	ENST00000588072.5	-20654	ENSG00000154889	MPPE1	metallophosphoesterase 1
chr18	12030171	12030644	474	*	Peak_8892	38	.	Promoter (1-2kb)	18	12028608	12030875	2268	1	3613	ENST00000589374.1	1563	ENSG00000141401	IMPA2	inositol monophosphatase 2
chr18	12088025	12088453	429	*	Peak_3576	48	.	Distal Intergenic	18	12093853	12127939	34087	1	342850	ENST00000587848.2	-5400	ENSG00000181626	ANKRD62	ankyrin repeat domain 62
chr18	12396432	12397063	632	*	Peak_3445	49	.	Distal Intergenic	18	12407896	12431463	23568	1	10650	ENST00000590956.5	-10833	ENSG00000141391	PRELID3A	PRELI domain containing 3A
chr18	12734908	12735335	428	*	Peak_11126	35	.	Distal Intergenic	18	12724128	12725740	1613	1	56984	ENST00000588824.1	10780	ENSG00000128789	PSMG2	proteasome assembly chaperone 2
chr18	12912242	12912764	523	*	Peak_8351	40	.	Intron (ENST00000592059.5/5771, intron 1 of 4)	18	12825804	12929643	103840	2	5771	ENST00000592059.5	16879	ENSG00000175354	PTPN2	protein tyrosine phosphatase non-receptor type 2
chr18	13252885	13253342	458	*	Peak_18926	25	.	Intron (ENST00000590371.5/753, intron 1 of 2)	18	13239543	13242076	2534	1	147276	ENST00000623680.1	13342	ENSG00000279020	C18orf15	chromosome 18 open reading frame 15 (putative)
chr18	13414376	13414605	230	*	Peak_13424	33	.	Intron (ENST00000587905.5/753, intron 3 of 4)	18	13419421	13427480	8060	2	100288122	ENST00000588672.1	12875	ENSG00000267690	LDLRAD4-AS1	LDLRAD4 antisense RNA 1
chr18	13460263	13460675	413	*	Peak_7709	40	.	Promoter (<=1kb)	18	13459947	13460026	80	1	100847080	ENST00000581537.1	316	ENSG00000266146	MIR5190	microRNA 5190
chr18	13487628	13487904	277	*	Peak_4046	47	.	Exon (ENST00000587344.1/ENST00000587344.1, exon 1 of 1)	18	13465015	13621270	156256	1	753	ENST00000593236.1	22613	ENSG00000168675	LDLRAD4	low density lipoprotein receptor class A domain containing 4
chr18	13623048	13623455	408	*	Peak_6660	42	.	Promoter (2-3kb)	18	13620868	13652754	31887	1	753	ENST00000435606.1	2180	ENSG00000168675	LDLRAD4	low density lipoprotein receptor class A domain containing 4
chr1	81377188	81377417	230	*	Peak_11857	34	.	Intron (ENST00000473719.5/23266, intron 1 of 4)	1	81306199	81992436	686238	1	23266	ENST00000469377.6	70989	ENSG00000117114	ADGRL2	adhesion G protein-coupled receptor L2
chr1	82096695	82096946	252	*	Peak_4562	46	.	Distal Intergenic	1	81988392	81990709	2318	1	23266	ENST00000464551.1	108303	ENSG00000117114	ADGRL2	adhesion G protein-coupled receptor L2
chr18	21779403	21779674	272	*	Peak_1901	58	.	Exon (ENST00000578646.5/57534, exon 6 of 21)	18	21798084	21819558	21475	1	57534	ENST00000577749.5	-18410	ENSG00000101752	MIB1	mindbomb E3 ubiquitin protein ligase 1
chr18	23369789	23370285	497	*	Peak_11861	34	.	Promoter (<=1kb)	18	23297748	23370281	72534	2	85019	ENST00000583048.5	0	ENSG00000134490	TMEM241	transmembrane protein 241
chr18	23413907	23414172	266	*	Peak_14405	31	.	Intron (ENST00000581444.5/85019, intron 3 of 15)	18	23356630	23437853	81224	2	85019	ENST00000577531.5	23681	ENSG00000134490	TMEM241	transmembrane protein 241
chr1	82360335	82360672	338	*	Peak_2498	53	.	Intron (ENST00000650063.1/ENST00000650063.1, intron 6 of 6)	1	81988392	81990709	2318	1	23266	ENST00000464551.1	371943	ENSG00000117114	ADGRL2	adhesion G protein-coupled receptor L2
chr18	23803585	23803821	237	*	Peak_16064	29	.	Intron (ENST00000313654.13/3909, intron 12 of 74)	18	23827404	23837312	9909	1	3909	ENST00000591749.1	-23583	ENSG00000053747	LAMA3	laminin subunit alpha 3
chr1	8244969	8245198	230	*	Peak_8469	39	.	Distal Intergenic	1	8208672	8215210	6539	1	102724539	ENST00000452982.1	36297	ENSG00000227634	LINC01714	long intergenic non-protein coding RNA 1714
chr1	8245629	8245946	318	*	Peak_3454	49	.	Distal Intergenic	1	8208672	8215210	6539	1	102724539	ENST00000452982.1	36957	ENSG00000227634	LINC01714	long intergenic non-protein coding RNA 1714
chr1	8248547	8248982	436	*	Peak_11273	34	.	Distal Intergenic	1	8208672	8215210	6539	1	102724539	ENST00000452982.1	39875	ENSG00000227634	LINC01714	long intergenic non-protein coding RNA 1714
chr1	8268633	8268933	301	*	Peak_11190	34	.	Distal Intergenic	1	8317826	8344165	26340	1	50651	ENST00000471889.5	-48893	ENSG00000162426	SLC45A1	solute carrier family 45 member 1
chr1	8300142	8300541	400	*	Peak_2871	52	.	Distal Intergenic	1	8317826	8344165	26340	1	50651	ENST00000471889.5	-17285	ENSG00000162426	SLC45A1	solute carrier family 45 member 1
chr18	30439016	30439245	230	*	Peak_11863	34	.	Distal Intergenic	18	30298910	30298960	51	1	100302131	ENST00000635955.1	140106	ENSG00000283218	MIR302F	microRNA 302f
[truncated: 3,109 more rows]

## Sheet: UV__even-odd.overlap.PeakAnno
seqnames	start	end	width	strand	V4	V5	V6	annotation	geneChr	geneStart	geneEnd	geneLength	geneStrand	geneId	transcriptId	distanceToTSS	ENSEMBL	SYMBOL	GENENAME
chr10	100355416	100355895	480	*	Peak_47996	54	.	Intron (ENST00000370355.2/6319, intron 4 of 5)	10	100347124	100364834	17711	1	6319	ENST00000370355.2	8292	ENSG00000099194	SCD	stearoyl-CoA desaturase
chr10	100570055	100572483	2429	*	Peak_1226	769	.	Distal Intergenic	10	100536470	100545497	9028	1	55662	ENST00000478787.1	33585	ENSG00000166135	HIF1AN	hypoxia inducible factor 1 subunit alpha inhibitor
chr10	100643261	100643629	369	*	Peak_56077	48	.	Distal Intergenic	10	100735603	100806599	70997	1	5076	ENST00000553492.5	-91974	ENSG00000075891	PAX2	paired box 2
chr10	100667697	100669396	1700	*	Peak_3711	398	.	Distal Intergenic	10	100735603	100806599	70997	1	5076	ENST00000553492.5	-66207	ENSG00000075891	PAX2	paired box 2
chr10	100735412	100736821	1410	*	Peak_49549	53	.	Promoter (<=1kb)	10	100735603	100806599	70997	1	5076	ENST00000553492.5	0	ENSG00000075891	PAX2	paired box 2
chr10	100737830	100739779	1950	*	Peak_13966	135	.	Promoter (2-3kb)	10	100735603	100806599	70997	1	5076	ENST00000553492.5	2227	ENSG00000075891	PAX2	paired box 2
chr10	100802411	100803326	916	*	Peak_23816	84	.	Intron (ENST00000553492.5/5076, intron 3 of 3)	10	100748850	100824654	75805	1	5076	ENST00000554172.2	53561	ENSG00000075891	PAX2	paired box 2
chr10	101310537	101310900	364	*	Peak_67181	42	.	Distal Intergenic	10	101354033	101557319	203287	1	8945	ENST00000393441.8	-43133	ENSG00000166167	BTRC	beta-transducin repeat containing E3 ubiquitin protein ligase
chr10	101317512	101317847	336	*	Peak_55361	48	.	Distal Intergenic	10	101354033	101557319	203287	1	8945	ENST00000393441.8	-36186	ENSG00000166167	BTRC	beta-transducin repeat containing E3 ubiquitin protein ligase
chr10	101618965	101619689	725	*	Peak_39106	61	.	Intron (ENST00000470093.5/6468, intron 1 of 3)	10	101611657	101613153	1497	2	6468	ENST00000482428.1	-5812	ENSG00000107829	FBXW4	F-box and WD repeat domain containing 4
chr10	101850691	101853557	2867	*	Peak_324	1000	.	Intron (ENST00000495001.1/79591, intron 1 of 2)	10	101825975	101843920	17946	2	30819	ENST00000358038.7	-6771	ENSG00000120049	KCNIP2	potassium voltage-gated channel interacting protein 2
chr10	101918760	101919389	630	*	Peak_56976	47	.	Intron (ENST00000370033.8/79591, intron 23 of 25)	10	101845599	101889736	44138	2	79591	ENST00000495001.1	-29024	ENSG00000120029	ARMH3	armadillo like helical domain containing 3
chr10	102079713	102080129	417	*	Peak_90632	33	.	Distal Intergenic	10	102065390	102068038	2649	1	79803	ENST00000299238.6	14323	ENSG00000166189	HPS6	HPS6 biogenesis of lysosomal organelles complex 2 subunit 3
chr10	102104751	102105273	523	*	Peak_20230	99	.	Downstream (2-3kb)	10	102110392	102111133	742	2	8861	ENST00000461873.5	5860	ENSG00000198728	LDB1	LIM domain binding 1
chr10	102219841	102220161	321	*	Peak_33344	67	.	Distal Intergenic	10	102226328	102229589	3262	1	83401	ENST00000370005.3	-6167	ENSG00000119915	ELOVL3	ELOVL fatty acid elongase 3
chr10	102961277	102962228	952	*	Peak_6655	256	.	Intron (ENST00000369878.8/54805, intron 1 of 7)	10	102918357	103078351	159995	1	54805	ENST00000433628.2	42920	ENSG00000148842	CNNM2	cyclin and CBS domain divalent metal cation transport mediator 2
chr10	103355938	103356250	313	*	Peak_33285	67	.	Distal Intergenic	10	103303128	103351144	48017	2	84108	ENST00000647574.1	-4794	ENSG00000156374	PCGF6	polycomb group ring finger 6
chr10	103459656	103460542	887	*	Peak_10895	171	.	Promoter (<=1kb)	10	103453387	103458888	5502	2	255022	ENST00000329905.5	-768	ENSG00000185933	CALHM1	calcium homeostasis modulator 1
chr10	103476954	103478223	1270	*	Peak_7682	229	.	Promoter (1-2kb)	10	103472804	103479240	6437	2	119395	ENST00000369783.4	1017	ENSG00000183128	CALHM3	calcium homeostasis modulator 3
chr10	103512208	103513047	840	*	Peak_35727	63	.	Promoter (2-3kb)	10	103511779	103515402	3624	2	102724341	ENST00000447820.1	2355	ENSG00000235470	NEURL1-AS1	NEURL1 antisense RNA 1
chr10	103519461	103519795	335	*	Peak_44440	54	.	Promoter (2-3kb)	10	103479603	103517393	37791	2	102724341	ENST00000453753.5	-2068	ENSG00000235470	NEURL1-AS1	NEURL1 antisense RNA 1
chr10	103649854	103650413	560	*	Peak_75189	41	.	Intron (ENST00000369774.8/9644, intron 8 of 14)	10	103599520	103693623	94104	2	9644	ENST00000315994.6	43210	ENSG00000107957	SH3PXD2A	SH3 and PX domains 2A
chr10	103703704	103704543	840	*	Peak_29666	72	.	Intron (ENST00000369774.8/9644, intron 5 of 14)	10	103599520	103693623	94104	2	9644	ENST00000315994.6	-10081	ENSG00000107957	SH3PXD2A	SH3 and PX domains 2A
chr10	103751710	103752115	406	*	Peak_18572	106	.	Intron (ENST00000627886.2/100505839, intron 3 of 3)	10	103746793	103754466	7674	1	100505839	ENST00000625265.1	4917	ENSG00000280693	SH3PXD2A-AS1	SH3PXD2A antisense RNA 1
chr10	104034269	104036676	2408	*	Peak_13608	139	.	Promoter (<=1kb)	10	104031350	104034130	2781	2	1308	ENST00000647647.1	-139	ENSG00000065618	COL17A1	collagen type XVII alpha 1 chain
chr10	104055700	104056037	338	*	Peak_26156	78	.	Promoter (<=1kb)	10	104055176	104055969	794	2	1308	ENST00000480127.2	0	ENSG00000065618	COL17A1	collagen type XVII alpha 1 chain
chr10	104816665	104817326	662	*	Peak_26948	76	.	Intron (ENST00000369701.7/22986, intron 1 of 26)	10	104664608	104666200	1593	2	100505890	ENST00000449805.2	-150465	ENSG00000226387	SORCS3-AS1	SORCS3 antisense RNA 1
chr10	105562990	105563379	390	*	Peak_56990	47	.	Distal Intergenic	10	105808775	105819197	10423	2	101927549	ENST00000447757.1	255818	NA	LINC02627	long intergenic non-protein coding RNA 2627
chr10	105719883	105720882	1000	*	Peak_33494	67	.	Distal Intergenic	10	105808775	105819197	10423	2	101927549	ENST00000447757.1	98315	NA	LINC02627	long intergenic non-protein coding RNA 2627
chr10	106068577	106070231	1655	*	Peak_2541	507	.	Distal Intergenic	10	106140264	106188722	48459	1	105378470	ENST00000449761.5	-70033	ENSG00000229775	LINC02624	long intergenic non-protein coding RNA 2624
chr10	106719035	106719516	482	*	Peak_31128	69	.	Intron (ENST00000263054.10/114815, intron 6 of 25)	10	106577182	106699358	122177	2	114815	ENST00000369698.5	-19677	ENSG00000108018	SORCS1	sortilin related VPS10 domain containing receptor 1
chr10	107022019	107022642	624	*	Peak_7368	236	.	Intron (ENST00000263054.10/114815, intron 1 of 25)	10	106577611	106956583	378973	2	114815	ENST00000344440.7	-65436	ENSG00000108018	SORCS1	sortilin related VPS10 domain containing receptor 1
chr10	108526423	108527098	676	*	Peak_39458	61	.	Distal Intergenic	10	108040381	108197849	157469	2	103695365	ENST00000629275.2	-328574	ENSG00000229981	LINC01435	long intergenic non-protein coding RNA 1435
chr10	109899797	109900250	454	*	Peak_22457	90	.	Intron (ENST00000488118.6/7511, intron 2 of 16)	10	109888098	109893493	5396	2	7511	ENST00000502595.5	-6304	ENSG00000108039	XPNPEP1	X-prolyl aminopeptidase 1
chr10	110401449	110402176	728	*	Peak_65244	44	.	Distal Intergenic	10	110497838	110511544	13707	1	1847	ENST00000369583.3	-95662	ENSG00000138166	DUSP5	dual specificity phosphatase 5
chr10	110841723	110842081	359	*	Peak_42569	57	.	Distal Intergenic	10	110835178	110836258	1081	1	282996	ENST00000465774.2	6545	ENSG00000203867	RBM20	RNA binding motif protein 20
chr10	110849567	110849876	310	*	Peak_39107	61	.	Distal Intergenic	10	110835178	110836258	1081	1	282996	ENST00000465774.2	14389	ENSG00000203867	RBM20	RNA binding motif protein 20
chr10	111426821	111427765	945	*	Peak_12086	154	.	Distal Intergenic	10	111077163	111080907	3745	1	150	ENST00000280155.3	349658	ENSG00000150594	ADRA2A	adrenoceptor alpha 2A
chr10	112370162	112370664	503	*	Peak_106234	23	.	Distal Intergenic	10	112374018	112428376	54359	1	51703	ENST00000354655.8	-3354	ENSG00000197142	ACSL5	acyl-CoA synthetase long chain family member 5
chr10	112410670	112411822	1153	*	Peak_5836	288	.	Promoter (<=1kb)	10	112411383	112417938	6556	1	51703	ENST00000467340.1	0	ENSG00000197142	ACSL5	acyl-CoA synthetase long chain family member 5
chr10	112994641	112995198	558	*	Peak_12844	145	.	Intron (ENST00000355995.8/6934, intron 4 of 14)	10	112950916	113141316	190401	1	6934	ENST00000346198.5	43725	ENSG00000148737	TCF7L2	transcription factor 7 like 2
chr10	113058629	113059046	418	*	Peak_15676	124	.	Intron (ENST00000355995.8/6934, intron 5 of 14)	10	113125536	113146096	20561	1	6934	ENST00000349937.7	-66490	ENSG00000148737	TCF7L2	transcription factor 7 like 2
chr10	113152430	113152739	310	*	Peak_33496	67	.	Promoter (<=1kb)	10	113152414	113165961	13548	1	6934	ENST00000480888.1	16	ENSG00000148737	TCF7L2	transcription factor 7 like 2
chr10	113185519	113185949	431	*	Peak_43366	56	.	Distal Intergenic	10	113161231	113165681	4451	1	6934	ENST00000494353.1	24288	ENSG00000148737	TCF7L2	transcription factor 7 like 2
chr10	113658422	113658977	556	*	Peak_81559	37	.	Intron (ENST00000369360.7/4892, intron 3 of 40)	10	113588716	113664046	75331	2	4892	ENST00000369360.7	5069	ENSG00000197893	NRAP	nebulin related anchoring protein
chr10	114222793	114223724	932	*	Peak_19032	103	.	Intron (ENST00000369282.5/56165, intron 21 of 24)	10	114239330	114289992	50663	1	340706	ENST00000298715.8	-15606	ENSG00000165816	VWA2	von Willebrand factor A domain containing 2
chr10	114297330	114299670	2341	*	Peak_4447	350	.	Promoter (2-3kb)	10	114294826	114302017	7192	2	84632	ENST00000491814.1	2347	ENSG00000169129	AFAP1L2	actin filament associated protein 1 like 2
chr10	115537697	115538132	436	*	Peak_31131	69	.	Intron (ENST00000355044.7/26033, intron 25 of 28)	10	115467174	115597982	130809	1	26033	ENST00000424738.1	70523	ENSG00000107518	ATRNL1	attractin like 1
chr10	115729602	115731178	1577	*	Peak_5377	301	.	Intron (ENST00000355044.7/26033, intron 27 of 28)	10	115909351	115944959	35609	1	26033	ENST00000449616.2	-178173	ENSG00000107518	ATRNL1	attractin like 1
chr10	115964045	115964692	648	*	Peak_79934	38	.	Distal Intergenic	10	115909351	115944959	35609	1	26033	ENST00000449616.2	54694	ENSG00000107518	ATRNL1	attractin like 1
chr10	116006120	116006667	548	*	Peak_50576	52	.	Distal Intergenic	10	115909351	115944959	35609	1	26033	ENST00000449616.2	96769	ENSG00000107518	ATRNL1	attractin like 1
chr10	116018187	116018520	334	*	Peak_57009	47	.	Distal Intergenic	10	115909351	115944959	35609	1	26033	ENST00000449616.2	108836	ENSG00000107518	ATRNL1	attractin like 1
chr10	116205212	116205852	641	*	Peak_41364	59	.	Intron (ENST00000369236.5/2674, intron 3 of 8)	10	116056925	116272282	215358	2	2674	ENST00000369236.5	66430	ENSG00000151892	GFRA1	GDNF family receptor alpha 1
chr10	116508496	116509318	823	*	Peak_12924	145	.	Distal Intergenic	10	116545931	116567855	21925	1	5406	ENST00000369221.2	-36613	ENSG00000175535	PNLIP	pancreatic lipase
chr10	116640867	116641841	975	*	Peak_15041	126	.	Intron (ENST00000579578.6/5408, intron 11 of 12)	10	116621306	116645143	23838	1	5408	ENST00000591655.3	19561	ENSG00000266200	PNLIPRP2	pancreatic lipase related protein 2 (gene/pseudogene)
chr10	116846806	116847132	327	*	Peak_50298	53	.	Promoter (2-3kb)	10	116849512	116882527	33016	1	387712	ENST00000409522.5	-2380	ENSG00000188316	ENO4	enolase 4
chr10	117222876	117223364	489	*	Peak_51402	51	.	Distal Intergenic	10	117241073	117279430	38358	1	6571	ENST00000298472.10	-17709	ENSG00000165646	SLC18A2	solute carrier family 18 member A2
chr10	117488715	117490261	1547	*	Peak_18457	107	.	Exon (ENST00000549104.1/ENST00000549104.1, exon 3 of 3)	10	117490649	117494688	4040	2	196047	ENST00000423419.1	4427	ENSG00000229847	EMX2OS	EMX2 opposite strand/antisense RNA
chr10	117704532	117705126	595	*	Peak_19390	100	.	Distal Intergenic	10	117484295	117545068	60774	2	196047	ENST00000551288.5	-159464	ENSG00000229847	EMX2OS	EMX2 opposite strand/antisense RNA
[truncated: 7,260 more rows]

## Sheet: UV2__even-odd.overlap.PeakAnno
seqnames	start	end	width	strand	V4	V5	V6	annotation	geneChr	geneStart	geneEnd	geneLength	geneStrand	geneId	transcriptId	distanceToTSS	ENSEMBL	SYMBOL	GENENAME
[truncated: 5,938 more rows]
