# Supplementary material for: lncRNA-ZFAS1, an emerging gate-keeper in DNA damage-dependent transcriptional regulation
Source: Research Square preprint supplement (doi:10.21203/rs.3.rs-3233912/v1), 2023-09-13
Supplement: Supplementary file 5 [file 8ea9da17a812d336ea7ed591.xlsx]

## Sheet: gene_filter peaks_Ctrl_BP.
ID	Description	GeneRatio	BgRatio	pvalue	p.adjust	qvalue	Count	ENTREZID	SYMBOL
GO:0050808	synapse organization	18/254	394/17913	1.41222e-05	0.0434539	0.0421435	18	3675/4898/2048/8927/375790/1740/1496/22941/2017/575/26052/9379/5792/4593/79953/387804/7402/85358	ITGA3/NRDC/EPHB2/BSN/AGRN/DLG2/CTNNA2/SHANK2/CTTN/ADGRB1/DNM3/NRXN2/PTPRF/MUSK/SYNDIG1/VSTM5/UTRN/SHANK3
GO:0007416	synapse assembly	11/254	172/17913	3.54763e-05	0.0545803	0.0529343	11	2048/8927/375790/22941/575/26052/9379/4593/79953/387804/85358	EPHB2/BSN/AGRN/SHANK2/ADGRB1/DNM3/NRXN2/MUSK/SYNDIG1/VSTM5/SHANK3
GO:0048871	multicellular organismal homeostasis	18/254	472/17913	0.000145784	0.149526	0.145017	18	4898/10083/51763/580/26154/654/133522/5547/2651/79054/5608/63976/94137/23090/4645/4012/57482/3356	NRDC/USH1C/INPP5K/BARD1/ABCA12/BMP6/PPARGC1B/PRCP/GCNT2/TRPM8/MAP2K6/PRDM16/RP1L1/ZNF423/MYO5B/LNPEP/KIAA1211/HTR2A
GO:0015850	organic hydroxy compound transport	11/254	228/17913	0.000427	0.300148	0.291097	11	11188/26154/654/29881/114883/64241/51083/8648/9123/3356/64240	NISCH/ABCA12/BMP6/NPC1L1/OSBPL9/ABCG8/GAL/NCOA1/SLC16A3/HTR2A/ABCG5
GO:0030299	intestinal cholesterol absorption	3/254	13/17913	0.000725333	0.300148	0.291097	3	29881/64241/64240	NPC1L1/ABCG8/ABCG5
GO:0007178	transmembrane receptor protein serine/threonine kinase signaling pathway	13/254	323/17913	0.000741531	0.300148	0.291097	13	3675/2662/654/7049/2651/63976/753/23090/1785/3172/4012/124857/112744	ITGA3/GDF10/BMP6/TGFBR3/GCNT2/PRDM16/LDLRAD4/ZNF423/DNM2/HNF4A/LNPEP/WFIKKN2/IL17F
GO:0043954	cellular component maintenance	5/254	52/17913	0.000831629	0.300148	0.291097	5	3675/8927/1740/2017/3801	ITGA3/BSN/DLG2/CTTN/KIFC3
GO:0010975	regulation of neuron projection development	16/254	458/17913	0.000875098	0.300148	0.291097	16	3675/65009/2048/146760/1496/7225/5754/2017/26052/9699/114788/1785/23499/5792/10090/85358	ITGA3/NDRG4/EPHB2/RTN4RL1/CTNNA2/TRPC6/PTK7/CTTN/DNM3/RIMS2/CSMD3/DNM2/MACF1/PTPRF/UST/SHANK3
GO:0006869	lipid transport	13/254	332/17913	0.000954046	0.300148	0.291097	13	4833/51422/4018/26154/654/29881/114883/28965/5608/64241/51083/8648/64240	NME4/PRKAG2/LPA/ABCA12/BMP6/NPC1L1/OSBPL9/SLC27A6/MAP2K6/ABCG8/GAL/NCOA1/ABCG5
GO:0090092	regulation of transmembrane receptor protein serine/threonine kinase signaling pathway	10/254	215/17913	0.00102348	0.300148	0.291097	10	3675/2662/654/7049/63976/753/23090/1785/124857/112744	ITGA3/GDF10/BMP6/TGFBR3/PRDM16/LDLRAD4/ZNF423/DNM2/WFIKKN2/IL17F
GO:0098856	intestinal lipid absorption	3/254	15/17913	0.00112998	0.300148	0.291097	3	29881/64241/64240	NPC1L1/ABCG8/ABCG5
GO:0017015	regulation of transforming growth factor beta receptor signaling pathway	7/254	115/17913	0.00126747	0.300148	0.291097	7	3675/7049/63976/753/1785/124857/112744	ITGA3/TGFBR3/PRDM16/LDLRAD4/DNM2/WFIKKN2/IL17F
GO:0007179	transforming growth factor beta receptor signaling pathway	9/254	184/17913	0.00127839	0.300148	0.291097	9	3675/2662/7049/2651/63976/753/1785/124857/112744	ITGA3/GDF10/TGFBR3/GCNT2/PRDM16/LDLRAD4/DNM2/WFIKKN2/IL17F
GO:1903844	regulation of cellular response to transforming growth factor beta stimulus	7/254	117/17913	0.00140091	0.300148	0.291097	7	3675/7049/63976/753/1785/124857/112744	ITGA3/TGFBR3/PRDM16/LDLRAD4/DNM2/WFIKKN2/IL17F
GO:0007528	neuromuscular junction development	4/254	35/17913	0.00146318	0.300148	0.291097	4	4898/375790/4593/7402	NRDC/AGRN/MUSK/UTRN
GO:0044241	lipid digestion	3/254	17/17913	0.00165374	0.318035	0.308444	3	29881/64241/64240	NPC1L1/ABCG8/ABCG5
GO:0001941	postsynaptic membrane organization	4/254	37/17913	0.00180519	0.318037	0.308446	4	2048/9379/4593/85358	EPHB2/NRXN2/MUSK/SHANK3
GO:0099173	postsynapse organization	8/254	158/17913	0.00189698	0.318037	0.308446	8	3675/2048/1740/2017/26052/9379/4593/85358	ITGA3/EPHB2/DLG2/CTTN/DNM3/NRXN2/MUSK/SHANK3
GO:0071625	vocalization behavior	3/254	18/17913	0.00196383	0.318037	0.308446	3	22941/9379/85358	SHANK2/NRXN2/SHANK3
GO:0010876	lipid localization	13/254	366/17913	0.00227115	0.34068	0.330406	13	4833/51422/4018/26154/654/29881/114883/28965/5608/64241/51083/8648/64240	NME4/PRKAG2/LPA/ABCA12/BMP6/NPC1L1/OSBPL9/SLC27A6/MAP2K6/ABCG8/GAL/NCOA1/ABCG5
GO:0007015	actin filament organization	12/254	325/17913	0.0024194	0.34068	0.330406	12	3055/10083/51763/10459/57553/133522/1496/10391/2017/9873/85358/57482	HCK/USH1C/INPP5K/MAD2L2/MICAL3/PPARGC1B/CTNNA2/CORO2B/CTTN/FCHSD2/SHANK3/KIAA1211
GO:0051965	positive regulation of synapse assembly	5/254	66/17913	0.0024358	0.34068	0.330406	5	2048/375790/575/79953/387804	EPHB2/AGRN/ADGRB1/SYNDIG1/VSTM5
GO:0055088	lipid homeostasis	7/254	132/17913	0.00278493	0.372575	0.36134	7	4041/26154/433/64241/2053/3172/64240	LRP5/ABCA12/ASGR2/ABCG8/EPHX2/HNF4A/ABCG5
GO:0001659	temperature homeostasis	8/254	172/17913	0.00320897	0.40178	0.389664	8	4898/133522/79054/5608/63976/23090/4012/3356	NRDC/PPARGC1B/TRPM8/MAP2K6/PRDM16/ZNF423/LNPEP/HTR2A
GO:0051963	regulation of synapse assembly	6/254	105/17913	0.00383143	0.40178	0.389664	6	2048/375790/575/4593/79953/387804	EPHB2/AGRN/ADGRB1/MUSK/SYNDIG1/VSTM5
GO:0050807	regulation of synapse organization	9/254	218/17913	0.00401565	0.40178	0.389664	9	2048/375790/1496/575/26052/4593/79953/387804/85358	EPHB2/AGRN/CTNNA2/ADGRB1/DNM3/MUSK/SYNDIG1/VSTM5/SHANK3
GO:0010799	regulation of peptidyl-threonine phosphorylation	4/254	46/17913	0.00403828	0.40178	0.389664	4	51763/51422/7225/57521	INPP5K/PRKAG2/TRPC6/RPTOR
GO:1904861	excitatory synapse assembly	3/254	23/17913	0.00404532	0.40178	0.389664	3	9379/387804/85358	NRXN2/VSTM5/SHANK3
GO:0106106	cold-induced thermogenesis	7/254	143/17913	0.00433477	0.40178	0.389664	7	4898/133522/79054/5608/63976/23090/4012	NRDC/PPARGC1B/TRPM8/MAP2K6/PRDM16/ZNF423/LNPEP
GO:0120161	regulation of cold-induced thermogenesis	7/254	143/17913	0.00433477	0.40178	0.389664	7	4898/133522/79054/5608/63976/23090/4012	NRDC/PPARGC1B/TRPM8/MAP2K6/PRDM16/ZNF423/LNPEP
GO:0120163	negative regulation of cold-induced thermogenesis	4/254	47/17913	0.00436558	0.40178	0.389664	4	4898/5608/23090/4012	NRDC/MAP2K6/ZNF423/LNPEP
GO:0050803	regulation of synapse structure or activity	9/254	222/17913	0.00451976	0.40178	0.389664	9	2048/375790/1496/575/26052/4593/79953/387804/85358	EPHB2/AGRN/CTNNA2/ADGRB1/DNM3/MUSK/SYNDIG1/VSTM5/SHANK3
GO:0060389	pathway-restricted SMAD protein phosphorylation	4/254	48/17913	0.00471029	0.40178	0.389664	4	2662/654/7049/753	GDF10/BMP6/TGFBR3/LDLRAD4
GO:0097061	dendritic spine organization	5/254	77/17913	0.00474991	0.40178	0.389664	5	3675/2048/2017/26052/85358	ITGA3/EPHB2/CTTN/DNM3/SHANK3
GO:0030512	negative regulation of transforming growth factor beta receptor signaling pathway	5/254	78/17913	0.00501779	0.40178	0.389664	5	7049/63976/753/1785/124857	TGFBR3/PRDM16/LDLRAD4/DNM2/WFIKKN2
GO:0035305	negative regulation of dephosphorylation	6/254	111/17913	0.00502648	0.40178	0.389664	6	51763/22853/1740/55105/26051/10842	INPP5K/LMTK2/DLG2/GPATCH2/PPP1R16B/PPP1R17
GO:0043113	receptor clustering	4/254	49/17913	0.00507284	0.40178	0.389664	4	375790/9379/4593/85358	AGRN/NRXN2/MUSK/SHANK3
GO:0099068	postsynapse assembly	3/254	25/17913	0.00514533	0.40178	0.389664	3	2048/9379/85358	EPHB2/NRXN2/SHANK3
GO:0007269	neurotransmitter secretion	7/254	149/17913	0.00541642	0.40178	0.389664	7	9381/10815/25953/9699/9379/1103/3356	OTOF/CPLX1/PNKD/RIMS2/NRXN2/CHAT/HTR2A
GO:0032535	regulation of cellular component size	11/254	315/17913	0.00548283	0.40178	0.389664	11	3055/10083/7409/1496/2017/1785/23499/57521/9873/85358/57482	HCK/USH1C/VAV1/CTNNA2/CTTN/DNM2/MACF1/RPTOR/FCHSD2/SHANK3/KIAA1211
GO:0033238	regulation of cellular amine metabolic process	5/254	80/17913	0.00558538	0.40178	0.389664	5	493/85300/23198/25953/5682	ATP2B4/ATCAY/PSME4/PNKD/PSMA1
GO:1903845	negative regulation of cellular response to transforming growth factor beta stimulus	5/254	80/17913	0.00558538	0.40178	0.389664	5	7049/63976/753/1785/124857	TGFBR3/PRDM16/LDLRAD4/DNM2/WFIKKN2
GO:0099643	signal release from synapse	7/254	150/17913	0.00561473	0.40178	0.389664	7	9381/10815/25953/9699/9379/1103/3356	OTOF/CPLX1/PNKD/RIMS2/NRXN2/CHAT/HTR2A
GO:1990845	adaptive thermogenesis	7/254	152/17913	0.00602763	0.413962	0.401479	7	4898/133522/79054/5608/63976/23090/4012	NRDC/PPARGC1B/TRPM8/MAP2K6/PRDM16/ZNF423/LNPEP
GO:0071560	cellular response to transforming growth factor beta stimulus	9/254	233/17913	0.00616268	0.413962	0.401479	9	3675/2662/7049/2651/63976/753/1785/124857/112744	ITGA3/GDF10/TGFBR3/GCNT2/PRDM16/LDLRAD4/DNM2/WFIKKN2/IL17F
GO:0090287	regulation of cellular response to growth factor stimulus	10/254	276/17913	0.00618858	0.413962	0.401479	10	3675/9146/57556/7049/63976/753/23090/1785/124857/112744	ITGA3/HGS/SEMA6A/TGFBR3/PRDM16/LDLRAD4/ZNF423/DNM2/WFIKKN2/IL17F
GO:0030838	positive regulation of actin filament polymerization	5/254	84/17913	0.0068539	0.426117	0.413267	5	3055/1496/2017/9873/57482	HCK/CTNNA2/CTTN/FCHSD2/KIAA1211
GO:0090288	negative regulation of cellular response to growth factor stimulus	7/254	156/17913	0.00692095	0.426117	0.413267	7	9146/57556/7049/63976/753/1785/124857	HGS/SEMA6A/TGFBR3/PRDM16/LDLRAD4/DNM2/WFIKKN2
GO:0032232	negative regulation of actin filament bundle assembly	3/254	28/17913	0.00710362	0.426117	0.413267	3	51763/10391/85358	INPP5K/CORO2B/SHANK3
GO:0106027	neuron projection organization	5/254	85/17913	0.00720004	0.426117	0.413267	5	3675/2048/2017/26052/85358	ITGA3/EPHB2/CTTN/DNM3/SHANK3
GO:0071559	response to transforming growth factor beta	9/254	239/17913	0.00723433	0.426117	0.413267	9	3675/2662/7049/2651/63976/753/1785/124857/112744	ITGA3/GDF10/TGFBR3/GCNT2/PRDM16/LDLRAD4/DNM2/WFIKKN2/IL17F
GO:0010800	positive regulation of peptidyl-threonine phosphorylation	3/254	29/17913	0.00784141	0.426117	0.413267	3	51422/7225/57521	PRKAG2/TRPC6/RPTOR
GO:0097106	postsynaptic density organization	3/254	29/17913	0.00784141	0.426117	0.413267	3	1740/9379/85358	DLG2/NRXN2/SHANK3
GO:0032368	regulation of lipid transport	6/254	122/17913	0.00789593	0.426117	0.413267	6	26154/654/5608/64241/51083/64240	ABCA12/BMP6/MAP2K6/ABCG8/GAL/ABCG5
GO:0044803	multi-organism membrane organization	2/254	10/17913	0.00836073	0.426117	0.413267	2	5297/9873	PI4KA/FCHSD2
GO:0070341	fat cell proliferation	2/254	10/17913	0.00836073	0.426117	0.413267	2	1869/1871	E2F1/E2F3
GO:0070344	regulation of fat cell proliferation	2/254	10/17913	0.00836073	0.426117	0.413267	2	1869/1871	E2F1/E2F3
GO:0098598	learned vocalization behavior or vocal learning	2/254	10/17913	0.00836073	0.426117	0.413267	2	9379/85358	NRXN2/SHANK3
GO:0099504	synaptic vesicle cycle	7/254	162/17913	0.0084404	0.426117	0.413267	7	9381/8927/10815/26052/9699/79953/3356	OTOF/BSN/CPLX1/DNM3/RIMS2/SYNDIG1/HTR2A
GO:0045197	establishment or maintenance of epithelial cell apical/basal polarity	3/254	30/17913	0.00862274	0.426117	0.413267	3	1045/55914/5754	CDX2/ERBIN/PTK7
GO:0035418	protein localization to synapse	4/254	57/17913	0.00866212	0.426117	0.413267	4	8927/1740/10815/9379	BSN/DLG2/CPLX1/NRXN2
GO:0051668	localization within membrane	6/254	126/17913	0.00918459	0.426117	0.413267	6	375790/1740/10815/9379/4593/85358	AGRN/DLG2/CPLX1/NRXN2/MUSK/SHANK3
GO:0032370	positive regulation of lipid transport	4/254	58/17913	0.00920238	0.426117	0.413267	4	26154/654/5608/51083	ABCA12/BMP6/MAP2K6/GAL
GO:0046847	filopodium assembly	4/254	58/17913	0.00920238	0.426117	0.413267	4	375790/26051/26052/387804	AGRN/PPP1R16B/DNM3/VSTM5
GO:0035303	regulation of dephosphorylation	8/254	206/17913	0.00929465	0.426117	0.413267	8	51763/22853/1740/133522/55105/26051/23261/10842	INPP5K/LMTK2/DLG2/PPARGC1B/GPATCH2/PPP1R16B/CAMTA1/PPP1R17
GO:0099084	postsynaptic specialization organization	3/254	31/17913	0.00944812	0.426117	0.413267	3	1740/9379/85358	DLG2/NRXN2/SHANK3
GO:0042632	cholesterol homeostasis	5/254	91/17913	0.00953638	0.426117	0.413267	5	4041/64241/2053/3172/64240	LRP5/ABCG8/EPHX2/HNF4A/ABCG5
GO:0031345	negative regulation of cell projection organization	7/254	166/17913	0.00958131	0.426117	0.413267	7	3675/2048/146760/7225/26052/1785/4134	ITGA3/EPHB2/RTN4RL1/TRPC6/DNM3/DNM2/MAP4
GO:0030111	regulation of Wnt signaling pathway	11/254	341/17913	0.00967303	0.426117	0.413267	11	3675/147495/10076/10459/55182/23198/27303/5754/9101/23499/5682	ITGA3/APCDD1/PTPRU/MAD2L2/RNF220/PSME4/RBMS3/PTK7/USP8/MACF1/PSMA1
GO:0051494	negative regulation of cytoskeleton organization	6/254	128/17913	0.00988234	0.426117	0.413267	6	51763/1496/10391/4869/85358/57482	INPP5K/CTNNA2/CORO2B/NPM1/SHANK3/KIAA1211
GO:0061564	axon development	13/254	438/17913	0.00996903	0.426117	0.413267	13	2048/146760/57556/1496/2017/575/1785/90249/23499/5792/10090/6586/85358	EPHB2/RTN4RL1/SEMA6A/CTNNA2/CTTN/ADGRB1/DNM2/UNC5A/MACF1/PTPRF/UST/SLIT3/SHANK3
GO:0055092	sterol homeostasis	5/254	92/17913	0.00997088	0.426117	0.413267	5	4041/64241/2053/3172/64240	LRP5/ABCG8/EPHX2/HNF4A/ABCG5
GO:1904396	regulation of neuromuscular junction development	2/254	11/17913	0.0101237	0.426721	0.413853	2	375790/4593	AGRN/MUSK
GO:0051591	response to cAMP	5/254	93/17913	0.0104188	0.433224	0.42016	5	51763/7056/133522/7299/4724	INPP5K/THBD/PPARGC1B/TYR/NDUFS4
GO:0090066	regulation of anatomical structure size	13/254	442/17913	0.0106969	0.438859	0.425625	13	3055/10083/7409/1496/2017/1785/23499/57521/2053/9873/85358/57482/3356	HCK/USH1C/VAV1/CTNNA2/CTTN/DNM2/MACF1/RPTOR/EPHX2/FCHSD2/SHANK3/KIAA1211/HTR2A
GO:0006521	regulation of cellular amino acid metabolic process	4/254	61/17913	0.0109533	0.443466	0.430093	4	493/85300/23198/5682	ATP2B4/ATCAY/PSME4/PSMA1
GO:0046578	regulation of Ras protein signal transduction	8/254	215/17913	0.0118227	0.452029	0.438398	8	3675/2048/7409/54922/5924/1785/9649/115727	ITGA3/EPHB2/VAV1/RASIP1/RASGRF2/DNM2/RALGPS1/RASGRP4
GO:1902018	negative regulation of cilium assembly	2/254	12/17913	0.0120357	0.452029	0.438398	2	1785/4134	DNM2/MAP4
GO:1902855	regulation of non-motile cilium assembly	2/254	12/17913	0.0120357	0.452029	0.438398	2	1785/4134	DNM2/MAP4
GO:0035088	establishment or maintenance of apical/basal cell polarity	3/254	34/17913	0.0121932	0.452029	0.438398	3	1045/55914/5754	CDX2/ERBIN/PTK7
GO:0061245	establishment or maintenance of bipolar cell polarity	3/254	34/17913	0.0121932	0.452029	0.438398	3	1045/55914/5754	CDX2/ERBIN/PTK7
GO:0071868	cellular response to monoamine stimulus	3/254	34/17913	0.0121932	0.452029	0.438398	3	493/1785/5142	ATP2B4/DNM2/PDE4B
GO:0071870	cellular response to catecholamine stimulus	3/254	34/17913	0.0121932	0.452029	0.438398	3	493/1785/5142	ATP2B4/DNM2/PDE4B
GO:0034765	regulation of ion transmembrane transport	13/254	453/17913	0.0129134	0.466252	0.452191	13	2048/493/1740/3763/7225/773/55151/1785/51083/5142/7402/85358/3739	EPHB2/ATP2B4/DLG2/KCNJ6/TRPC6/CACNA1A/TMEM38B/DNM2/GAL/PDE4B/UTRN/SHANK3/KCNA4
GO:0030534	adult behavior	6/254	137/17913	0.0134936	0.466252	0.452191	6	5079/22941/285671/9379/85358/3356	PAX5/SHANK2/RNF180/NRXN2/SHANK3/HTR2A
GO:0097479	synaptic vesicle localization	6/254	137/17913	0.0134936	0.466252	0.452191	6	9381/10815/9699/1785/79953/3356	OTOF/CPLX1/RIMS2/DNM2/SYNDIG1/HTR2A
GO:0006687	glycosphingolipid metabolic process	4/254	65/17913	0.0136029	0.466252	0.452191	4	7915/285362/8869/29906	ALDH5A1/SUMF1/ST3GAL5/ST8SIA5
GO:0032414	positive regulation of ion transmembrane transporter activity	5/254	100/17913	0.0139448	0.466252	0.452191	5	2048/7225/1785/51083/85358	EPHB2/TRPC6/DNM2/GAL/SHANK3
GO:0016311	dephosphorylation	13/254	458/17913	0.0140311	0.466252	0.452191	13	10076/51763/22853/2139/1740/133522/55105/26051/23261/22978/5792/2053/10842	PTPRU/INPP5K/LMTK2/EYA2/DLG2/PPARGC1B/GPATCH2/PPP1R16B/CAMTA1/NT5C2/PTPRF/EPHX2/PPP1R17
GO:0010642	negative regulation of platelet-derived growth factor receptor signaling pathway	2/254	13/17913	0.0140921	0.466252	0.452191	2	65009/9146	NDRG4/HGS
GO:0031223	auditory behavior	2/254	13/17913	0.0140921	0.466252	0.452191	2	9379/85358	NRXN2/SHANK3
GO:0033623	regulation of integrin activation	2/254	13/17913	0.0140921	0.466252	0.452191	2	54922/8631	RASIP1/SKAP1
GO:0071872	cellular response to epinephrine stimulus	2/254	13/17913	0.0140921	0.466252	0.452191	2	493/5142	ATP2B4/PDE4B
GO:0050892	intestinal absorption	3/254	36/17913	0.014251	0.466494	0.452427	3	29881/64241/64240	NPC1L1/ABCG8/ABCG5
GO:0018107	peptidyl-threonine phosphorylation	5/254	101/17913	0.0145064	0.469854	0.455685	5	51763/22853/51422/7225/57521	INPP5K/LMTK2/PRKAG2/TRPC6/RPTOR
GO:0051056	regulation of small GTPase mediated signal transduction	10/254	316/17913	0.0150512	0.473318	0.459045	10	3675/2048/7409/54922/5924/9901/1785/9649/115727/57568	ITGA3/EPHB2/VAV1/RASIP1/RASGRF2/SRGAP3/DNM2/RALGPS1/RASGRP4/SIPA1L2
GO:0009064	glutamine family amino acid metabolic process	4/254	68/17913	0.0158357	0.473318	0.459045	4	7915/493/80150/85300	ALDH5A1/ATP2B4/ASRGL1/ATCAY
GO:0042698	ovulation cycle	4/254	68/17913	0.0158357	0.473318	0.459045	4	5608/2516/8648/6586	MAP2K6/NR5A1/NCOA1/SLIT3
GO:0050805	negative regulation of synaptic transmission	4/254	68/17913	0.0158357	0.473318	0.459045	4	22941/25953/85358/3356	SHANK2/PNKD/SHANK3/HTR2A
GO:0006910	phagocytosis, recognition	2/254	14/17913	0.0162885	0.473318	0.459045	2	2219/575	FCN1/ADGRB1
GO:0034315	regulation of Arp2/3 complex-mediated actin nucleation	2/254	14/17913	0.0162885	0.473318	0.459045	2	1496/9873	CTNNA2/FCHSD2
GO:0046459	short-chain fatty acid metabolic process	2/254	14/17913	0.0162885	0.473318	0.459045	2	7915/84532	ALDH5A1/ACSS1
GO:0099558	maintenance of synapse structure	2/254	14/17913	0.0162885	0.473318	0.459045	2	8927/1740	BSN/DLG2
GO:2000846	regulation of corticosteroid hormone secretion	2/254	14/17913	0.0162885	0.473318	0.459045	2	654/51083	BMP6/GAL
GO:0110053	regulation of actin filament organization	8/254	228/17913	0.0163232	0.473318	0.459045	8	3055/51763/1496/10391/2017/9873/85358/57482	HCK/INPP5K/CTNNA2/CORO2B/CTTN/FCHSD2/SHANK3/KIAA1211
GO:0071867	response to monoamine	3/254	38/17913	0.0164938	0.473318	0.459045	3	493/1785/5142	ATP2B4/DNM2/PDE4B
GO:0071869	response to catecholamine	3/254	38/17913	0.0164938	0.473318	0.459045	3	493/1785/5142	ATP2B4/DNM2/PDE4B
GO:0001505	regulation of neurotransmitter levels	10/254	321/17913	0.0166131	0.473318	0.459045	10	9381/7915/493/10815/25953/9699/1785/9379/1103/3356	OTOF/ALDH5A1/ATP2B4/CPLX1/PNKD/RIMS2/DNM2/NRXN2/CHAT/HTR2A
GO:0014074	response to purine-containing compound	6/254	145/17913	0.0174022	0.491252	0.476438	6	51763/7056/133522/55151/7299/4724	INPP5K/THBD/PPARGC1B/TMEM38B/TYR/NDUFS4
GO:0015918	sterol transport	5/254	107/17913	0.0181964	0.491958	0.477123	5	26154/29881/114883/64241/64240	ABCA12/NPC1L1/OSBPL9/ABCG8/ABCG5
GO:0007638	mechanosensory behavior	2/254	15/17913	0.0186206	0.491958	0.477123	2	9379/85358	NRXN2/SHANK3
GO:0035930	corticosteroid hormone secretion	2/254	15/17913	0.0186206	0.491958	0.477123	2	654/51083	BMP6/GAL
GO:0097107	postsynaptic density assembly	2/254	15/17913	0.0186206	0.491958	0.477123	2	9379/85358	NRXN2/SHANK3
GO:1900451	positive regulation of glutamate receptor signaling pathway	2/254	15/17913	0.0186206	0.491958	0.477123	2	2048/85358	EPHB2/SHANK3
GO:1903358	regulation of Golgi organization	2/254	15/17913	0.0186206	0.491958	0.477123	2	5605/1785	MAP2K2/DNM2
GO:2000047	regulation of cell-cell adhesion mediated by cadherin	2/254	15/17913	0.0186206	0.491958	0.477123	2	10076/10459	PTPRU/MAD2L2
GO:0032412	regulation of ion transmembrane transporter activity	8/254	234/17913	0.0187717	0.491958	0.477123	8	2048/1740/7225/1785/51083/5142/7402/85358	EPHB2/DLG2/TRPC6/DNM2/GAL/PDE4B/UTRN/SHANK3
GO:0032411	positive regulation of transporter activity	5/254	108/17913	0.0188661	0.491958	0.477123	5	2048/7225/1785/51083/85358	EPHB2/TRPC6/DNM2/GAL/SHANK3
GO:0035019	somatic stem cell population maintenance	4/254	72/17913	0.0191524	0.495227	0.480293	4	1045/5435/63976/22882	CDX2/POLR2F/PRDM16/ZHX2
GO:0018210	peptidyl-threonine modification	5/254	109/17913	0.0195519	0.497304	0.482308	5	51763/22853/51422/7225/57521	INPP5K/LMTK2/PRKAG2/TRPC6/RPTOR
GO:0071900	regulation of protein serine/threonine kinase activity	13/254	479/17913	0.019556	0.497304	0.482308	13	9146/2048/4041/493/51763/5606/51422/54922/5605/5608/2911/57521/3356	HGS/EPHB2/LRP5/ATP2B4/INPP5K/MAP2K3/PRKAG2/RASIP1/MAP2K2/MAP2K6/GRM1/RPTOR/HTR2A
GO:0090317	negative regulation of intracellular protein transport	3/254	41/17913	0.0202079	0.506842	0.491558	3	51763/580/337867	INPP5K/BARD1/UBAC2
GO:1905952	regulation of lipid localization	6/254	151/17913	0.0208006	0.506842	0.491558	6	26154/654/5608/64241/51083/64240	ABCA12/BMP6/MAP2K6/ABCG8/GAL/ABCG5
GO:0022038	corpus callosum development	2/254	16/17913	0.0210841	0.506842	0.491558	2	2048/146760	EPHB2/RTN4RL1
GO:0034116	positive regulation of heterotypic cell-cell adhesion	2/254	16/17913	0.0210841	0.506842	0.491558	2	2651/8631	GCNT2/SKAP1
GO:0050774	negative regulation of dendrite morphogenesis	2/254	16/17913	0.0210841	0.506842	0.491558	2	7225/26052	TRPC6/DNM3
GO:0060457	negative regulation of digestive system process	2/254	16/17913	0.0210841	0.506842	0.491558	2	64241/64240	ABCG8/ABCG5
GO:0071871	response to epinephrine	2/254	16/17913	0.0210841	0.506842	0.491558	2	493/5142	ATP2B4/PDE4B
GO:0051489	regulation of filopodium assembly	3/254	42/17913	0.0215397	0.51378	0.498287	3	375790/26051/26052	AGRN/PPP1R16B/DNM3
GO:0022898	regulation of transmembrane transporter activity	8/254	242/17913	0.0224312	0.53093	0.51492	8	2048/1740/7225/1785/51083/5142/7402/85358	EPHB2/DLG2/TRPC6/DNM2/GAL/PDE4B/UTRN/SHANK3
GO:0008361	regulation of cell size	6/254	154/17913	0.0226577	0.532196	0.516147	6	7409/2017/1785/23499/57521/85358	VAV1/CTTN/DNM2/MACF1/RPTOR/SHANK3
GO:0003281	ventricular septum development	4/254	76/17913	0.0228688	0.533086	0.517011	4	7049/5754/1785/6586	TGFBR3/PTK7/DNM2/SLIT3
GO:2000831	regulation of steroid hormone secretion	2/254	17/17913	0.0236748	0.537877	0.521657	2	654/51083	BMP6/GAL
GO:0032970	regulation of actin filament-based process	10/254	341/17913	0.0240795	0.537877	0.521657	10	3055/51763/1496/10391/2017/29119/9873/5142/85358/57482	HCK/INPP5K/CTNNA2/CORO2B/CTTN/CTNNA3/FCHSD2/PDE4B/SHANK3/KIAA1211
GO:0035196	production of miRNAs involved in gene silencing by miRNA	3/254	44/17913	0.0243441	0.537877	0.521657	3	23264/131405/5605	ZC3H7B/TRIM71/MAP2K2
GO:0060393	regulation of pathway-restricted SMAD protein phosphorylation	3/254	44/17913	0.0243441	0.537877	0.521657	3	2662/654/753	GDF10/BMP6/LDLRAD4
GO:0097720	calcineurin-mediated signaling	3/254	44/17913	0.0243441	0.537877	0.521657	3	493/23261/2516	ATP2B4/CAMTA1/NR5A1
GO:0010810	regulation of cell-substrate adhesion	7/254	201/17913	0.0248011	0.537877	0.521657	7	3675/10391/2651/8631/1785/23499/7402	ITGA3/CORO2B/GCNT2/SKAP1/DNM2/MACF1/UTRN
GO:0032273	positive regulation of protein polymerization	5/254	116/17913	0.0248124	0.537877	0.521657	5	3055/1496/2017/9873/57482	HCK/CTNNA2/CTTN/FCHSD2/KIAA1211
GO:1905954	positive regulation of lipid localization	4/254	78/17913	0.0248802	0.537877	0.521657	4	26154/654/5608/51083	ABCA12/BMP6/MAP2K6/GAL
GO:0007611	learning or memory	8/254	247/17913	0.0249592	0.537877	0.521657	8	3675/65009/2048/22941/9379/4593/85358/3356	ITGA3/NDRG4/EPHB2/SHANK2/NRXN2/MUSK/SHANK3/HTR2A
GO:0007409	axonogenesis	11/254	393/17913	0.0249972	0.537877	0.521657	11	2048/57556/1496/2017/575/1785/90249/23499/10090/6586/85358	EPHB2/SEMA6A/CTNNA2/CTTN/ADGRB1/DNM2/UNC5A/MACF1/UST/SLIT3/SHANK3
GO:0050804	modulation of chemical synaptic transmission	11/254	393/17913	0.0249972	0.537877	0.521657	11	2048/11188/773/22941/10815/575/25953/9101/9699/85358/3356	EPHB2/NISCH/CACNA1A/SHANK2/CPLX1/ADGRB1/PNKD/USP8/RIMS2/SHANK3/HTR2A
GO:0099177	regulation of trans-synaptic signaling	11/254	394/17913	0.0254048	0.540911	0.5246	11	2048/11188/773/22941/10815/575/25953/9101/9699/85358/3356	EPHB2/NISCH/CACNA1A/SHANK2/CPLX1/ADGRB1/PNKD/USP8/RIMS2/SHANK3/HTR2A
GO:0022602	ovulation cycle process	3/254	45/17913	0.0258167	0.540911	0.5246	3	5608/2516/6586	MAP2K6/NR5A1/SLIT3
GO:0046580	negative regulation of Ras protein signal transduction	3/254	45/17913	0.0258167	0.540911	0.5246	3	3675/2048/54922	ITGA3/EPHB2/RASIP1
GO:0016055	Wnt signaling pathway	13/254	498/17913	0.0258414	0.540911	0.5246	13	3675/4041/147495/10076/10459/1456/55182/23198/27303/5754/9101/23499/5682	ITGA3/LRP5/APCDD1/PTPRU/MAD2L2/CSNK1G3/RNF220/PSME4/RBMS3/PTK7/USP8/MACF1/PSMA1
GO:0070828	heterochromatin organization	2/254	18/17913	0.0263887	0.541097	0.52478	2	22893/63976	BAHD1/PRDM16
GO:0098698	postsynaptic specialization assembly	2/254	18/17913	0.0263887	0.541097	0.52478	2	9379/85358	NRXN2/SHANK3
GO:0048667	cell morphogenesis involved in neuron differentiation	13/254	500/17913	0.0265807	0.541097	0.52478	13	2048/57556/1496/7225/2017/575/26052/1785/90249/23499/10090/6586/85358	EPHB2/SEMA6A/CTNNA2/TRPC6/CTTN/ADGRB1/DNM3/DNM2/UNC5A/MACF1/UST/SLIT3/SHANK3
GO:0198738	cell-cell signaling by wnt	13/254	500/17913	0.0265807	0.541097	0.52478	13	3675/4041/147495/10076/10459/1456/55182/23198/27303/5754/9101/23499/5682	ITGA3/LRP5/APCDD1/PTPRU/MAD2L2/CSNK1G3/RNF220/PSME4/RBMS3/PTK7/USP8/MACF1/PSMA1
GO:0006520	cellular amino acid metabolic process	10/254	347/17913	0.0267295	0.541097	0.52478	10	7915/493/80150/85300/10667/23198/339896/7299/5682/3172	ALDH5A1/ATP2B4/ASRGL1/ATCAY/FARS2/PSME4/GADL1/TYR/PSMA1/HNF4A
GO:0051100	negative regulation of binding	6/254	162/17913	0.028147	0.550572	0.533969	6	10459/1869/59082/5792/5195/124857	MAD2L2/E2F1/CARD18/PTPRF/PEX14/WFIKKN2
GO:0044106	cellular amine metabolic process	5/254	121/17913	0.0290778	0.550572	0.533969	5	493/85300/23198/25953/5682	ATP2B4/ATCAY/PSME4/PNKD/PSMA1
GO:0090101	negative regulation of transmembrane receptor protein serine/threonine kinase signaling pathway	5/254	121/17913	0.0290778	0.550572	0.533969	5	7049/63976/753/1785/124857	TGFBR3/PRDM16/LDLRAD4/DNM2/WFIKKN2
GO:0010639	negative regulation of organelle organization	10/254	352/17913	0.0290925	0.550572	0.533969	10	51763/10459/5079/1496/10391/4869/1785/4134/85358/57482	INPP5K/MAD2L2/PAX5/CTNNA2/CORO2B/NPM1/DNM2/MAP4/SHANK3/KIAA1211
GO:0016048	detection of temperature stimulus	2/254	19/17913	0.0292217	0.550572	0.533969	2	79054/3356	TRPM8/HTR2A
GO:1900017	positive regulation of cytokine production involved in inflammatory response	2/254	19/17913	0.0292217	0.550572	0.533969	2	84818/112744	IL17RC/IL17F
GO:0050769	positive regulation of neurogenesis	12/254	455/17913	0.0294771	0.550572	0.533969	12	3675/65009/2048/1869/654/7225/5754/9699/23499/8648/85358/23440	ITGA3/NDRG4/EPHB2/E2F1/BMP6/TRPC6/PTK7/RIMS2/MACF1/NCOA1/SHANK3/OTP
GO:1902904	negative regulation of supramolecular fiber organization	5/254	122/17913	0.029983	0.550572	0.533969	5	51763/1496/10391/85358/57482	INPP5K/CTNNA2/CORO2B/SHANK3/KIAA1211
GO:0031050	dsRNA processing	3/254	48/17913	0.0305151	0.550572	0.533969	3	23264/131405/5605	ZC3H7B/TRIM71/MAP2K2
GO:0043392	negative regulation of DNA binding	3/254	48/17913	0.0305151	0.550572	0.533969	3	10459/1869/124857	MAD2L2/E2F1/WFIKKN2
GO:0070918	production of small RNA involved in gene silencing by RNA	3/254	48/17913	0.0305151	0.550572	0.533969	3	23264/131405/5605	ZC3H7B/TRIM71/MAP2K2
GO:0032409	regulation of transporter activity	8/254	257/17913	0.0306007	0.550572	0.533969	8	2048/1740/7225/1785/51083/5142/7402/85358	EPHB2/DLG2/TRPC6/DNM2/GAL/PDE4B/UTRN/SHANK3
GO:0120032	regulation of plasma membrane bounded cell projection assembly	6/254	166/17913	0.0311945	0.550572	0.533969	6	375790/26051/26052/1785/4134/79647	AGRN/PPP1R16B/DNM3/DNM2/MAP4/AKIRIN1
GO:0071621	granulocyte chemotaxis	4/254	84/17913	0.0315392	0.550572	0.533969	4	7409/84818/5142/79647	VAV1/IL17RC/PDE4B/AKIRIN1
GO:0090100	positive regulation of transmembrane receptor protein serine/threonine kinase signaling pathway	4/254	84/17913	0.0315392	0.550572	0.533969	4	2662/654/7049/23090	GDF10/BMP6/TGFBR3/ZNF423
GO:0019218	regulation of steroid metabolic process	5/254	124/17913	0.0318463	0.550572	0.533969	5	64788/654/51083/2053/2516	LMF1/BMP6/GAL/EPHX2/NR5A1
GO:0003323	type B pancreatic cell development	2/254	20/17913	0.0321701	0.550572	0.533969	2	654/3172	BMP6/HNF4A
GO:0010592	positive regulation of lamellipodium assembly	2/254	20/17913	0.0321701	0.550572	0.533969	2	1785/79647	DNM2/AKIRIN1
GO:0035929	steroid hormone secretion	2/254	20/17913	0.0321701	0.550572	0.533969	2	654/51083	BMP6/GAL
GO:0044331	cell-cell adhesion mediated by cadherin	2/254	20/17913	0.0321701	0.550572	0.533969	2	10076/10459	PTPRU/MAD2L2
GO:0097062	dendritic spine maintenance	2/254	20/17913	0.0321701	0.550572	0.533969	2	3675/2017	ITGA3/CTTN
GO:0097503	sialylation	2/254	20/17913	0.0321701	0.550572	0.533969	2	8869/29906	ST3GAL5/ST8SIA5
GO:0060395	SMAD protein signal transduction	3/254	49/17913	0.0321743	0.550572	0.533969	3	654/3172/4012	BMP6/HNF4A/LNPEP
GO:0010769	regulation of cell morphogenesis involved in differentiation	8/254	260/17913	0.0324512	0.550572	0.533969	8	2048/7225/2017/26052/1785/23499/10090/85358	EPHB2/TRPC6/CTTN/DNM3/DNM2/MACF1/UST/SHANK3
GO:0060491	regulation of cell projection assembly	6/254	168/17913	0.032796	0.550572	0.533969	6	375790/26051/26052/1785/4134/79647	AGRN/PPP1R16B/DNM3/DNM2/MAP4/AKIRIN1
GO:0001894	tissue homeostasis	7/254	214/17913	0.0332638	0.550572	0.533969	7	10083/580/26154/133522/2651/94137/57482	USH1C/BARD1/ABCA12/PPARGC1B/GCNT2/RP1L1/KIAA1211
GO:0007160	cell-matrix adhesion	7/254	214/17913	0.0332638	0.550572	0.533969	7	3675/6614/10391/8631/2017/23499/7402	ITGA3/SIGLEC1/CORO2B/SKAP1/CTTN/MACF1/UTRN
GO:0048489	synaptic vesicle transport	5/254	126/17913	0.0337805	0.550572	0.533969	5	9381/10815/9699/1785/3356	OTOF/CPLX1/RIMS2/DNM2/HTR2A
GO:0097480	establishment of synaptic vesicle localization	5/254	126/17913	0.0337805	0.550572	0.533969	5	9381/10815/9699/1785/3356	OTOF/CPLX1/RIMS2/DNM2/HTR2A
GO:0060070	canonical Wnt signaling pathway	9/254	311/17913	0.0338005	0.550572	0.533969	9	4041/10076/10459/55182/23198/27303/5754/9101/5682	LRP5/PTPRU/MAD2L2/RNF220/PSME4/RBMS3/PTK7/USP8/PSMA1
GO:0035176	social behavior	3/254	50/17913	0.0338799	0.550572	0.533969	3	22941/9379/85358	SHANK2/NRXN2/SHANK3
GO:0051703	intraspecies interaction between organisms	3/254	50/17913	0.0338799	0.550572	0.533969	3	22941/9379/85358	SHANK2/NRXN2/SHANK3
GO:0060976	coronary vasculature development	3/254	50/17913	0.0338799	0.550572	0.533969	3	7049/5754/1785	TGFBR3/PTK7/DNM2
GO:0099072	regulation of postsynaptic membrane neurotransmitter receptor levels	3/254	50/17913	0.0338799	0.550572	0.533969	3	55914/1740/10815	ERBIN/DLG2/CPLX1
GO:0031346	positive regulation of cell projection organization	10/254	362/17913	0.0342573	0.550572	0.533969	10	3675/65009/375790/5754/26052/9699/1785/23499/85358/79647	ITGA3/NDRG4/AGRN/PTK7/DNM3/RIMS2/DNM2/MACF1/SHANK3/AKIRIN1
GO:1904062	regulation of cation transmembrane transport	9/254	312/17913	0.0343922	0.550572	0.533969	9	2048/493/1740/55151/1785/51083/5142/7402/85358	EPHB2/ATP2B4/DLG2/TMEM38B/DNM2/GAL/PDE4B/UTRN/SHANK3
GO:0008154	actin polymerization or depolymerization	6/254	170/17913	0.03445	0.550572	0.533969	6	3055/57553/1496/2017/9873/57482	HCK/MICAL3/CTNNA2/CTTN/FCHSD2/KIAA1211
GO:0030177	positive regulation of Wnt signaling pathway	6/254	170/17913	0.03445	0.550572	0.533969	6	55182/23198/5754/9101/23499/5682	RNF220/PSME4/PTK7/USP8/MACF1/PSMA1
GO:0060828	regulation of canonical Wnt signaling pathway	8/254	264/17913	0.0350354	0.550572	0.533969	8	10076/10459/55182/23198/27303/5754/9101/5682	PTPRU/MAD2L2/RNF220/PSME4/RBMS3/PTK7/USP8/PSMA1
GO:0007215	glutamate receptor signaling pathway	4/254	87/17913	0.0352246	0.550572	0.533969	4	2048/1740/2911/85358	EPHB2/DLG2/GRM1/SHANK3
GO:0060021	roof of mouth development	4/254	87/17913	0.0352246	0.550572	0.533969	4	2048/7049/63976/124857	EPHB2/TGFBR3/PRDM16/WFIKKN2
GO:0021854	hypothalamus development	2/254	21/17913	0.0352299	0.550572	0.533969	2	8648/23440	NCOA1/OTP
GO:0035024	negative regulation of Rho protein signal transduction	2/254	21/17913	0.0352299	0.550572	0.533969	2	3675/54922	ITGA3/RASIP1
GO:0050951	sensory perception of temperature stimulus	2/254	21/17913	0.0352299	0.550572	0.533969	2	79054/3356	TRPM8/HTR2A
GO:0010921	regulation of phosphatase activity	6/254	171/17913	0.0352968	0.550572	0.533969	6	22853/1740/133522/55105/26051/10842	LMTK2/DLG2/PPARGC1B/GPATCH2/PPP1R16B/PPP1R17
GO:0051058	negative regulation of small GTPase mediated signal transduction	3/254	51/17913	0.0356316	0.550572	0.533969	3	3675/2048/54922	ITGA3/EPHB2/RASIP1
GO:1902305	regulation of sodium ion transmembrane transport	3/254	51/17913	0.0356316	0.550572	0.533969	3	493/1785/7402	ATP2B4/DNM2/UTRN
GO:0009308	amine metabolic process	5/254	128/17913	0.0357863	0.550572	0.533969	5	493/85300/23198/25953/5682	ATP2B4/ATCAY/PSME4/PNKD/PSMA1
GO:0030833	regulation of actin filament polymerization	5/254	129/17913	0.0368162	0.563599	0.546603	5	3055/1496/2017/9873/57482	HCK/CTNNA2/CTTN/FCHSD2/KIAA1211
GO:0046683	response to organophosphorus	5/254	130/17913	0.0378641	0.573538	0.556242	5	51763/7056/133522/7299/4724	INPP5K/THBD/PPARGC1B/TYR/NDUFS4
GO:0033622	integrin activation	2/254	22/17913	0.0383974	0.573538	0.556242	2	54922/8631	RASIP1/SKAP1
GO:0051457	maintenance of protein location in nucleus	2/254	22/17913	0.0383974	0.573538	0.556242	2	580/2516	BARD1/NR5A1
GO:0097205	renal filtration	2/254	22/17913	0.0383974	0.573538	0.556242	2	3675/10391	ITGA3/CORO2B
GO:1900273	positive regulation of long-term synaptic potentiation	2/254	22/17913	0.0383974	0.573538	0.556242	2	2048/85358	EPHB2/SHANK3
GO:0048813	dendrite morphogenesis	5/254	131/17913	0.0389302	0.578688	0.561237	5	2048/1496/7225/26052/85358	EPHB2/CTNNA2/TRPC6/DNM3/SHANK3
GO:0006469	negative regulation of protein kinase activity	7/254	222/17913	0.039329	0.581804	0.564259	7	2048/4041/51763/51422/54922/4869/57521	EPHB2/LRP5/INPP5K/PRKAG2/RASIP1/NPM1/RPTOR
GO:0007586	digestion	5/254	132/17913	0.0400145	0.586308	0.568627	5	440387/29881/64241/57482/64240	CTRB2/NPC1L1/ABCG8/KIAA1211/ABCG5
GO:0060048	cardiac muscle contraction	5/254	132/17913	0.0400145	0.586308	0.568627	5	5606/5608/55151/29119/5142	MAP2K3/MAP2K6/TMEM38B/CTNNA3/PDE4B
GO:0051348	negative regulation of transferase activity	8/254	272/17913	0.0406148	0.590802	0.572986	8	2048/4041/51763/10459/51422/54922/4869/57521	EPHB2/LRP5/INPP5K/MAD2L2/PRKAG2/RASIP1/NPM1/RPTOR
GO:0031589	cell-substrate adhesion	9/254	322/17913	0.0407052	0.590802	0.572986	9	3675/6614/10391/2651/8631/2017/1785/23499/7402	ITGA3/SIGLEC1/CORO2B/GCNT2/SKAP1/CTTN/DNM2/MACF1/UTRN
GO:0010565	regulation of cellular ketone metabolic process	6/254	178/17913	0.0416006	0.596351	0.578368	6	493/51422/654/85300/23198/5682	ATP2B4/PRKAG2/BMP6/ATCAY/PSME4/PSMA1
GO:0051125	regulation of actin nucleation	2/254	23/17913	0.041669	0.596351	0.578368	2	1496/9873	CTNNA2/FCHSD2
GO:2000637	positive regulation of gene silencing by miRNA	2/254	23/17913	0.041669	0.596351	0.578368	2	131405/5605	TRIM71/MAP2K2
GO:0007265	Ras protein signal transduction	9/254	324/17913	0.0420561	0.599104	0.581038	9	3675/2048/7409/11188/54922/5924/1785/9649/115727	ITGA3/EPHB2/VAV1/NISCH/RASIP1/RASGRF2/DNM2/RALGPS1/RASGRP4
GO:0031663	lipopolysaccharide-mediated signaling pathway	3/254	55/17913	0.0430945	0.600386	0.582281	3	3055/654/23643	HCK/BMP6/LY96
GO:0035306	positive regulation of dephosphorylation	3/254	55/17913	0.0430945	0.600386	0.582281	3	133522/26051/23261	PPARGC1B/PPP1R16B/CAMTA1
GO:0060997	dendritic spine morphogenesis	3/254	55/17913	0.0430945	0.600386	0.582281	3	2048/26052/85358	EPHB2/DNM3/SHANK3
GO:0090263	positive regulation of canonical Wnt signaling pathway	5/254	135/17913	0.0433769	0.600386	0.582281	5	55182/23198/5754/9101/5682	RNF220/PSME4/PTK7/USP8/PSMA1
GO:0022604	regulation of cell morphogenesis	11/254	430/17913	0.0434983	0.600386	0.582281	11	3055/2048/7225/2017/26052/114299/9699/1785/23499/10090/85358	HCK/EPHB2/TRPC6/CTTN/DNM3/PALM2/RIMS2/DNM2/MACF1/UST/SHANK3
GO:1990778	protein localization to cell periphery	8/254	276/17913	0.0436147	0.600386	0.582281	8	3675/2048/51763/26154/1740/10815/8631/23499	ITGA3/EPHB2/INPP5K/ABCA12/DLG2/CPLX1/SKAP1/MACF1
GO:0071901	negative regulation of protein serine/threonine kinase activity	5/254	136/17913	0.0445343	0.600386	0.582281	5	4041/51763/51422/54922/57521	LRP5/INPP5K/PRKAG2/RASIP1/RPTOR
GO:0007229	integrin-mediated signaling pathway	4/254	94/17913	0.0447553	0.600386	0.582281	4	3675/3055/7409/55914	ITGA3/HCK/VAV1/ERBIN
GO:0022600	digestive system process	4/254	94/17913	0.0447553	0.600386	0.582281	4	29881/64241/57482/64240	NPC1L1/ABCG8/KIAA1211/ABCG5
GO:0006688	glycosphingolipid biosynthetic process	2/254	24/17913	0.0450412	0.600386	0.582281	2	8869/29906	ST3GAL5/ST8SIA5
GO:0010640	regulation of platelet-derived growth factor receptor signaling pathway	2/254	24/17913	0.0450412	0.600386	0.582281	2	65009/9146	NDRG4/HGS
GO:0060148	positive regulation of posttranscriptional gene silencing	2/254	24/17913	0.0450412	0.600386	0.582281	2	131405/5605	TRIM71/MAP2K2
GO:0060343	trabecula formation	2/254	24/17913	0.0450412	0.600386	0.582281	2	133522/7049	PPARGC1B/TGFBR3
GO:0033344	cholesterol efflux	3/254	56/17913	0.0450729	0.600386	0.582281	3	26154/64241/64240	ABCA12/ABCG8/ABCG5
GO:1900449	regulation of glutamate receptor signaling pathway	3/254	56/17913	0.0450729	0.600386	0.582281	3	2048/1740/85358	EPHB2/DLG2/SHANK3
GO:0023061	signal release	11/254	433/17913	0.0453261	0.601157	0.583029	11	9381/654/773/10815/25953/9699/9379/1103/51083/3172/3356	OTOF/BMP6/CACNA1A/CPLX1/PNKD/RIMS2/NRXN2/CHAT/GAL/HNF4A/HTR2A
GO:0015718	monocarboxylic acid transport	5/254	137/17913	0.04571	0.603647	0.585444	5	51422/28965/5608/8648/9123	PRKAG2/SLC27A6/MAP2K6/NCOA1/SLC16A3
GO:0120034	positive regulation of plasma membrane bounded cell projection assembly	4/254	95/17913	0.0462234	0.607818	0.589488	4	375790/26052/1785/79647	AGRN/DNM3/DNM2/AKIRIN1
GO:0018105	peptidyl-serine phosphorylation	7/254	231/17913	0.0469696	0.615001	0.596456	7	493/51763/10459/22853/1456/5605/57521	ATP2B4/INPP5K/MAD2L2/LMTK2/CSNK1G3/MAP2K2/RPTOR
GO:0051384	response to glucocorticoid	5/254	139/17913	0.0481168	0.616803	0.598203	5	10076/654/133522/9101/6586	PTPRU/BMP6/PPARGC1B/USP8/SLIT3
GO:0002068	glandular epithelial cell development	2/254	25/17913	0.0485104	0.616803	0.598203	2	654/3172	BMP6/HNF4A
GO:0003309	type B pancreatic cell differentiation	2/254	25/17913	0.0485104	0.616803	0.598203	2	654/3172	BMP6/HNF4A
GO:0009065	glutamine family amino acid catabolic process	2/254	25/17913	0.0485104	0.616803	0.598203	2	493/80150	ATP2B4/ASRGL1
GO:0031664	regulation of lipopolysaccharide-mediated signaling pathway	2/254	25/17913	0.0485104	0.616803	0.598203	2	654/23643	BMP6/LY96
GO:0048169	regulation of long-term neuronal synaptic plasticity	2/254	25/17913	0.0485104	0.616803	0.598203	2	2048/85358	EPHB2/SHANK3
GO:0051497	negative regulation of stress fiber assembly	2/254	25/17913	0.0485104	0.616803	0.598203	2	51763/10391	INPP5K/CORO2B
GO:0030301	cholesterol transport	4/254	98/17913	0.0507872	0.640429	0.621117	4	26154/29881/64241/64240	ABCA12/NPC1L1/ABCG8/ABCG5
GO:0034394	protein localization to cell surface	3/254	59/17913	0.0512732	0.640429	0.621117	3	2219/10076/26154	FCN1/PTPRU/ABCA12
GO:0050890	cognition	8/254	286/17913	0.0517444	0.640429	0.621117	8	3675/65009/2048/22941/9379/4593/85358/3356	ITGA3/NDRG4/EPHB2/SHANK2/NRXN2/MUSK/SHANK3/HTR2A
GO:0007612	learning	5/254	142/17913	0.0518653	0.640429	0.621117	5	65009/2048/22941/9379/85358	NDRG4/EPHB2/SHANK2/NRXN2/SHANK3
GO:0010996	response to auditory stimulus	2/254	26/17913	0.0520732	0.640429	0.621117	2	9379/85358	NRXN2/SHANK3
GO:0034114	regulation of heterotypic cell-cell adhesion	2/254	26/17913	0.0520732	0.640429	0.621117	2	2651/8631	GCNT2/SKAP1
GO:1901018	positive regulation of potassium ion transmembrane transporter activity	2/254	26/17913	0.0520732	0.640429	0.621117	2	1785/51083	DNM2/GAL
GO:0050878	regulation of body fluid levels	12/254	499/17913	0.0529484	0.640429	0.621117	12	2048/7409/51763/7056/26154/5890/5547/7225/10391/8648/3172/4645	EPHB2/VAV1/INPP5K/THBD/ABCA12/RAD51B/PRCP/TRPC6/CORO2B/NCOA1/HNF4A/MYO5B
GO:0032371	regulation of sterol transport	3/254	60/17913	0.0534272	0.640429	0.621117	3	26154/64241/64240	ABCA12/ABCG8/ABCG5
GO:0032374	regulation of cholesterol transport	3/254	60/17913	0.0534272	0.640429	0.621117	3	26154/64241/64240	ABCA12/ABCG8/ABCG5
GO:0016079	synaptic vesicle exocytosis	4/254	100/17913	0.0539622	0.640429	0.621117	4	9381/10815/9699/3356	OTOF/CPLX1/RIMS2/HTR2A
GO:0097530	granulocyte migration	4/254	100/17913	0.0539622	0.640429	0.621117	4	7409/84818/5142/79647	VAV1/IL17RC/PDE4B/AKIRIN1
GO:0031334	positive regulation of protein complex assembly	7/254	239/17913	0.054508	0.640429	0.621117	7	3055/54922/1496/8631/2017/9873/57482	HCK/RASIP1/CTNNA2/SKAP1/CTTN/FCHSD2/KIAA1211
GO:0010923	negative regulation of phosphatase activity	4/254	101/17913	0.0555892	0.640429	0.621117	4	22853/1740/55105/10842	LMTK2/DLG2/GPATCH2/PPP1R17
GO:0048675	axon extension	4/254	101/17913	0.0555892	0.640429	0.621117	4	2017/1785/23499/6586	CTTN/DNM2/MACF1/SLIT3
GO:0034113	heterotypic cell-cell adhesion	3/254	61/17913	0.0556241	0.640429	0.621117	3	2651/8631/29119	GCNT2/SKAP1/CTNNA3
GO:0035883	enteroendocrine cell differentiation	2/254	27/17913	0.0557264	0.640429	0.621117	2	654/3172	BMP6/HNF4A
GO:0046839	phospholipid dephosphorylation	2/254	27/17913	0.0557264	0.640429	0.621117	2	51763/2053	INPP5K/EPHX2
GO:0048679	regulation of axon regeneration	2/254	27/17913	0.0557264	0.640429	0.621117	2	146760/5792	RTN4RL1/PTPRF
GO:0120033	negative regulation of plasma membrane bounded cell projection assembly	2/254	27/17913	0.0557264	0.640429	0.621117	2	1785/4134	DNM2/MAP4
GO:1902751	positive regulation of cell cycle G2/M phase transition	2/254	27/17913	0.0557264	0.640429	0.621117	2	5890/4869	RAD51B/NPM1
GO:1905144	response to acetylcholine	2/254	27/17913	0.0557264	0.640429	0.621117	2	493/375790	ATP2B4/AGRN
GO:1905145	cellular response to acetylcholine	2/254	27/17913	0.0557264	0.640429	0.621117	2	493/375790	ATP2B4/AGRN
GO:2000171	negative regulation of dendrite development	2/254	27/17913	0.0557264	0.640429	0.621117	2	7225/26052	TRPC6/DNM3
GO:2000463	positive regulation of excitatory postsynaptic potential	2/254	27/17913	0.0557264	0.640429	0.621117	2	9699/85358	RIMS2/SHANK3
GO:0030041	actin filament polymerization	5/254	145/17913	0.05578	0.640429	0.621117	5	3055/1496/2017/9873/57482	HCK/CTNNA2/CTTN/FCHSD2/KIAA1211
GO:0006936	muscle contraction	9/254	343/17913	0.0564135	0.641562	0.622215	9	493/5606/5608/2017/55151/29119/5142/7402/3356	ATP2B4/MAP2K3/MAP2K6/CTTN/TMEM38B/CTNNA3/PDE4B/UTRN/HTR2A
GO:0006836	neurotransmitter transport	7/254	241/17913	0.0565042	0.641562	0.622215	7	9381/10815/25953/9699/9379/1103/3356	OTOF/CPLX1/PNKD/RIMS2/NRXN2/CHAT/HTR2A
GO:0042180	cellular ketone metabolic process	7/254	241/17913	0.0565042	0.641562	0.622215	7	493/51422/654/85300/23198/25953/5682	ATP2B4/PRKAG2/BMP6/ATCAY/PSME4/PNKD/PSMA1
GO:0008064	regulation of actin polymerization or depolymerization	5/254	147/17913	0.0584821	0.650855	0.631228	5	3055/1496/2017/9873/57482	HCK/CTNNA2/CTTN/FCHSD2/KIAA1211
GO:0006813	potassium ion transport	6/254	194/17913	0.0585398	0.650855	0.631228	6	3763/55151/1785/51083/3739/3356	KCNJ6/TMEM38B/DNM2/GAL/KCNA4/HTR2A
GO:0032091	negative regulation of protein binding	4/254	103/17913	0.0589221	0.650855	0.631228	4	59082/5792/5195/124857	CARD18/PTPRF/PEX14/WFIKKN2
GO:0010165	response to X-ray	2/254	28/17913	0.0594666	0.650855	0.631228	2	7056/1785	THBD/DNM2
GO:0034698	response to gonadotropin	2/254	28/17913	0.0594666	0.650855	0.631228	2	3675/7049	ITGA3/TGFBR3
GO:0039694	viral RNA genome replication	2/254	28/17913	0.0594666	0.650855	0.631228	2	5297/51763	PI4KA/INPP5K
GO:0060292	long-term synaptic depression	2/254	28/17913	0.0594666	0.650855	0.631228	2	22941/85358	SHANK2/SHANK3
GO:1902745	positive regulation of lamellipodium organization	2/254	28/17913	0.0594666	0.650855	0.631228	2	1785/79647	DNM2/AKIRIN1
GO:0033673	negative regulation of kinase activity	7/254	244/17913	0.0595828	0.650855	0.631228	7	2048/4041/51763/51422/54922/4869/57521	EPHB2/LRP5/INPP5K/PRKAG2/RASIP1/NPM1/RPTOR
GO:0030832	regulation of actin filament length	5/254	148/17913	0.0598609	0.650855	0.631228	5	3055/1496/2017/9873/57482	HCK/CTNNA2/CTTN/FCHSD2/KIAA1211
GO:0050770	regulation of axonogenesis	5/254	148/17913	0.0598609	0.650855	0.631228	5	2048/2017/1785/23499/10090	EPHB2/CTTN/DNM2/MACF1/UST
GO:1990138	neuron projection extension	5/254	148/17913	0.0598609	0.650855	0.631228	5	2017/9699/1785/23499/6586	CTTN/RIMS2/DNM2/MACF1/SLIT3
GO:0045600	positive regulation of fat cell differentiation	3/254	63/17913	0.0601452	0.651643	0.631992	3	4041/63976/3356	LRP5/PRDM16/HTR2A
GO:0021537	telencephalon development	7/254	246/17913	0.0616916	0.664358	0.644324	7	2048/493/5079/146760/83696/8648/85358	EPHB2/ATP2B4/PAX5/RTN4RL1/TRAPPC9/NCOA1/SHANK3
GO:0032956	regulation of actin cytoskeleton organization	8/254	297/17913	0.0617506	0.664358	0.644324	8	3055/51763/1496/10391/2017/9873/85358/57482	HCK/INPP5K/CTNNA2/CORO2B/CTTN/FCHSD2/SHANK3/KIAA1211
GO:0032372	negative regulation of sterol transport	2/254	29/17913	0.0632907	0.66598	0.645897	2	64241/64240	ABCG8/ABCG5
GO:0032375	negative regulation of cholesterol transport	2/254	29/17913	0.0632907	0.66598	0.645897	2	64241/64240	ABCG8/ABCG5
GO:1903539	protein localization to postsynaptic membrane	2/254	29/17913	0.0632907	0.66598	0.645897	2	1740/10815	DLG2/CPLX1
GO:2000778	positive regulation of interleukin-6 secretion	2/254	29/17913	0.0632907	0.66598	0.645897	2	84818/112744	IL17RC/IL17F
GO:0030178	negative regulation of Wnt signaling pathway	6/254	198/17913	0.0633344	0.66598	0.645897	6	147495/10076/10459/23198/27303/5682	APCDD1/PTPRU/MAD2L2/PSME4/RBMS3/PSMA1
GO:0002065	columnar/cuboidal epithelial cell differentiation	4/254	106/17913	0.0641168	0.66598	0.645897	4	1045/10083/654/3172	CDX2/USH1C/BMP6/HNF4A
GO:0098693	regulation of synaptic vesicle cycle	4/254	106/17913	0.0641168	0.66598	0.645897	4	8927/10815/26052/3356	BSN/CPLX1/DNM3/HTR2A
GO:0032387	negative regulation of intracellular transport	3/254	65/17913	0.0648329	0.66598	0.645897	3	51763/580/337867	INPP5K/BARD1/UBAC2
GO:0035308	negative regulation of protein dephosphorylation	3/254	65/17913	0.0648329	0.66598	0.645897	3	22853/26051/10842	LMTK2/PPP1R16B/PPP1R17
GO:0071242	cellular response to ammonium ion	3/254	65/17913	0.0648329	0.66598	0.645897	3	493/375790/1785	ATP2B4/AGRN/DNM2
GO:0034767	positive regulation of ion transmembrane transport	5/254	152/17913	0.0655601	0.66598	0.645897	5	2048/7225/1785/51083/85358	EPHB2/TRPC6/DNM2/GAL/SHANK3
GO:1901605	alpha-amino acid metabolic process	6/254	200/17913	0.0658161	0.66598	0.645897	6	7915/493/80150/85300/7299/3172	ALDH5A1/ATP2B4/ASRGL1/ATCAY/TYR/HNF4A
GO:0006024	glycosaminoglycan biosynthetic process	4/254	107/17913	0.0659001	0.66598	0.645897	4	375790/2651/10090/9672	AGRN/GCNT2/UST/SDC3
GO:0050905	neuromuscular process	4/254	107/17913	0.0659001	0.66598	0.645897	4	10083/1496/23261/25953	USH1C/CTNNA2/CAMTA1/PNKD
GO:0045666	positive regulation of neuron differentiation	9/254	355/17913	0.0669463	0.66598	0.645897	9	3675/65009/654/7225/5754/9699/23499/8648/85358	ITGA3/NDRG4/BMP6/TRPC6/PTK7/RIMS2/MACF1/NCOA1/SHANK3
GO:0045665	negative regulation of neuron differentiation	6/254	201/17913	0.0670781	0.66598	0.645897	6	57534/2048/146760/7225/26052/22882	MIB1/EPHB2/RTN4RL1/TRPC6/DNM3/ZHX2
GO:0043254	regulation of protein complex assembly	10/254	409/17913	0.0671233	0.66598	0.645897	10	3055/54922/1496/3054/8631/2017/753/9873/57482/5195	HCK/RASIP1/CTNNA2/HCFC1/SKAP1/CTTN/LDLRAD4/FCHSD2/KIAA1211/PEX14
GO:0006362	transcription elongation from RNA polymerase I promoter	2/254	30/17913	0.0671955	0.66598	0.645897	2	5435/25885	POLR2F/POLR1A
GO:0007202	activation of phospholipase C activity	2/254	30/17913	0.0671955	0.66598	0.645897	2	115727/3356	RASGRP4/HTR2A
GO:0010862	positive regulation of pathway-restricted SMAD protein phosphorylation	2/254	30/17913	0.0671955	0.66598	0.645897	2	2662/654	GDF10/BMP6
GO:0034314	Arp2/3 complex-mediated actin nucleation	2/254	30/17913	0.0671955	0.66598	0.645897	2	1496/9873	CTNNA2/FCHSD2
GO:0051491	positive regulation of filopodium assembly	2/254	30/17913	0.0671955	0.66598	0.645897	2	375790/26052	AGRN/DNM3
GO:0006023	aminoglycan biosynthetic process	4/254	108/17913	0.0677091	0.66598	0.645897	4	375790/2651/10090/9672	AGRN/GCNT2/UST/SDC3
GO:0006664	glycolipid metabolic process	4/254	108/17913	0.0677091	0.66598	0.645897	4	7915/285362/8869/29906	ALDH5A1/SUMF1/ST3GAL5/ST8SIA5
GO:0007264	small GTPase mediated signal transduction	11/254	465/17913	0.0681585	0.66598	0.645897	11	3675/2048/7409/11188/54922/5924/9901/1785/9649/115727/57568	ITGA3/EPHB2/VAV1/NISCH/RASIP1/RASGRF2/SRGAP3/DNM2/RALGPS1/RASGRP4/SIPA1L2
GO:0018209	peptidyl-serine modification	7/254	252/17913	0.0682897	0.66598	0.645897	7	493/51763/10459/22853/1456/5605/57521	ATP2B4/INPP5K/MAD2L2/LMTK2/CSNK1G3/MAP2K2/RPTOR
GO:1903509	liposaccharide metabolic process	4/254	109/17913	0.0695437	0.66598	0.645897	4	7915/285362/8869/29906	ALDH5A1/SUMF1/ST3GAL5/ST8SIA5
GO:0051705	multi-organism behavior	3/254	67/17913	0.0696836	0.66598	0.645897	3	22941/9379/85358	SHANK2/NRXN2/SHANK3
GO:0099601	regulation of neurotransmitter receptor activity	3/254	67/17913	0.0696836	0.66598	0.645897	3	2048/1740/85358	EPHB2/DLG2/SHANK3
GO:0031960	response to corticosteroid	5/254	155/17913	0.0700272	0.66598	0.645897	5	10076/654/133522/9101/6586	PTPRU/BMP6/PPARGC1B/USP8/SLIT3
GO:0006363	termination of RNA polymerase I transcription	2/254	31/17913	0.0711781	0.66598	0.645897	2	5435/25885	POLR2F/POLR1A
GO:0006536	glutamate metabolic process	2/254	31/17913	0.0711781	0.66598	0.645897	2	7915/85300	ALDH5A1/ATCAY
GO:0010591	regulation of lamellipodium assembly	2/254	31/17913	0.0711781	0.66598	0.645897	2	1785/79647	DNM2/AKIRIN1
GO:0016601	Rac protein signal transduction	2/254	31/17913	0.0711781	0.66598	0.645897	2	11188/1785	NISCH/DNM2
GO:0048854	brain morphogenesis	2/254	31/17913	0.0711781	0.66598	0.645897	2	1496/85358	CTNNA2/SHANK3
GO:0070570	regulation of neuron projection regeneration	2/254	31/17913	0.0711781	0.66598	0.645897	2	146760/5792	RTN4RL1/PTPRF
GO:0010811	positive regulation of cell-substrate adhesion	4/254	110/17913	0.0714037	0.66598	0.645897	4	3675/8631/1785/7402	ITGA3/SKAP1/DNM2/UTRN
GO:0050891	multicellular organismal water homeostasis	3/254	68/17913	0.0721689	0.66598	0.645897	3	51763/26154/4645	INPP5K/ABCA12/MYO5B
GO:0030203	glycosaminoglycan metabolic process	5/254	157/17913	0.0730964	0.66598	0.645897	5	3697/375790/2651/10090/9672	ITIH1/AGRN/GCNT2/UST/SDC3
GO:0043488	regulation of mRNA stability	5/254	158/17913	0.0746583	0.66598	0.645897	5	131405/1869/23198/4869/5682	TRIM71/E2F1/PSME4/NPM1/PSMA1
GO:2001259	positive regulation of cation channel activity	3/254	69/17913	0.0746934	0.66598	0.645897	3	2048/51083/85358	EPHB2/GAL/SHANK3
GO:0007613	memory	4/254	112/17913	0.0751994	0.66598	0.645897	4	3675/4593/85358/3356	ITGA3/MUSK/SHANK3/HTR2A
GO:1903828	negative regulation of cellular protein localization	4/254	112/17913	0.0751994	0.66598	0.645897	4	51763/580/337867/25885	INPP5K/BARD1/UBAC2/POLR1A
GO:0010719	negative regulation of epithelial to mesenchymal transition	2/254	32/17913	0.0752354	0.66598	0.645897	2	10459/753	MAD2L2/LDLRAD4
GO:0071709	membrane assembly	2/254	32/17913	0.0752354	0.66598	0.645897	2	2048/9379	EPHB2/NRXN2
GO:0010959	regulation of metal ion transport	9/254	365/17913	0.0766125	0.66598	0.645897	9	493/51763/7225/55151/1785/51083/5142/7402/3356	ATP2B4/INPP5K/TRPC6/TMEM38B/DNM2/GAL/PDE4B/UTRN/HTR2A
GO:0003279	cardiac septum development	4/254	113/17913	0.0771349	0.66598	0.645897	4	7049/5754/1785/6586	TGFBR3/PTK7/DNM2/SLIT3
GO:0007200	phospholipase C-activating G protein-coupled receptor signaling pathway	3/254	70/17913	0.0772568	0.66598	0.645897	3	3062/2911/3356	HCRTR2/GRM1/HTR2A
GO:0060193	positive regulation of lipase activity	3/254	70/17913	0.0772568	0.66598	0.645897	3	64788/115727/3356	LMF1/RASGRP4/HTR2A
GO:0098876	vesicle-mediated transport to the plasma membrane	3/254	70/17913	0.0772568	0.66598	0.645897	3	10815/1785/23499	CPLX1/DNM2/MACF1
GO:0016579	protein deubiquitination	7/254	260/17913	0.0777228	0.66598	0.645897	7	9146/580/23198/3054/9101/5682/84132	HGS/BARD1/PSME4/HCFC1/USP8/PSMA1/USP42
GO:1902903	regulation of supramolecular fiber organization	8/254	313/17913	0.0783386	0.66598	0.645897	8	3055/51763/1496/10391/2017/9873/85358/57482	HCK/INPP5K/CTNNA2/CORO2B/CTTN/FCHSD2/SHANK3/KIAA1211
GO:0006022	aminoglycan metabolic process	5/254	161/17913	0.0794523	0.66598	0.645897	5	3697/375790/2651/10090/9672	ITIH1/AGRN/GCNT2/UST/SDC3
GO:0034404	nucleobase-containing small molecule biosynthetic process	6/254	211/17913	0.0804703	0.66598	0.645897	6	4833/51422/5169/22978/5142/3356	NME4/PRKAG2/ENPP3/NT5C2/PDE4B/HTR2A
GO:0009063	cellular amino acid catabolic process	4/254	115/17913	0.0810802	0.66598	0.645897	4	7915/493/80150/339896	ALDH5A1/ATP2B4/ASRGL1/GADL1
GO:0002028	regulation of sodium ion transport	3/254	72/17913	0.0824979	0.66598	0.645897	3	493/1785/7402	ATP2B4/DNM2/UTRN
GO:0043487	regulation of RNA stability	5/254	163/17913	0.082738	0.66598	0.645897	5	131405/1869/23198/4869/5682	TRIM71/E2F1/PSME4/NPM1/PSMA1
GO:0030900	forebrain development	9/254	371/17913	0.0828036	0.66598	0.645897	9	2048/493/5079/1869/146760/83696/8648/85358/23440	EPHB2/ATP2B4/PAX5/E2F1/RTN4RL1/TRAPPC9/NCOA1/SHANK3/OTP
GO:0072595	maintenance of protein localization in organelle	2/254	34/17913	0.0835628	0.66598	0.645897	2	580/2516	BARD1/NR5A1
GO:0071466	cellular response to xenobiotic stimulus	5/254	164/17913	0.0844076	0.66598	0.645897	5	1869/55151/9101/2053/3172	E2F1/TMEM38B/USP8/EPHX2/HNF4A
GO:0060560	developmental growth involved in morphogenesis	6/254	214/17913	0.0847602	0.66598	0.645897	6	2017/9699/1785/23499/51083/6586	CTTN/RIMS2/DNM2/MACF1/GAL/SLIT3
GO:0006874	cellular calcium ion homeostasis	9/254	375/17913	0.0870944	0.66598	0.645897	9	493/3062/7225/773/79054/55151/2911/2053/3356	ATP2B4/HCRTR2/TRPC6/CACNA1A/TRPM8/TMEM38B/GRM1/EPHX2/HTR2A
GO:0008202	steroid metabolic process	8/254	321/17913	0.0875439	0.66598	0.645897	8	64788/51422/654/29881/114883/51083/2053/2516	LMF1/PRKAG2/BMP6/NPC1L1/OSBPL9/GAL/EPHX2/NR5A1
GO:0009755	hormone-mediated signaling pathway	6/254	216/17913	0.0876893	0.66598	0.645897	6	133522/5547/1395/2516/8648/3172	PPARGC1B/PRCP/CRHR2/NR5A1/NCOA1/HNF4A
GO:0016358	dendrite development	6/254	216/17913	0.0876893	0.66598	0.645897	6	2048/1496/7225/26052/114788/85358	EPHB2/CTNNA2/TRPC6/DNM3/CSMD3/SHANK3
GO:0048588	developmental cell growth	6/254	216/17913	0.0876893	0.66598	0.645897	6	2017/9699/1785/23499/51083/6586	CTTN/RIMS2/DNM2/MACF1/GAL/SLIT3
GO:2001257	regulation of cation channel activity	5/254	166/17913	0.0877999	0.66598	0.645897	5	2048/1740/51083/5142/85358	EPHB2/DLG2/GAL/PDE4B/SHANK3
GO:0006361	transcription initiation from RNA polymerase I promoter	2/254	35/17913	0.0878273	0.66598	0.645897	2	5435/25885	POLR2F/POLR1A
GO:0048333	mesodermal cell differentiation	2/254	35/17913	0.0878273	0.66598	0.645897	2	3675/2139	ITGA3/EYA2
GO:0070423	nucleotide-binding oligomerization domain containing signaling pathway	2/254	35/17913	0.0878273	0.66598	0.645897	2	55914/5608	ERBIN/MAP2K6
GO:0070884	regulation of calcineurin-NFAT signaling cascade	2/254	35/17913	0.0878273	0.66598	0.645897	2	493/23261	ATP2B4/CAMTA1
GO:0106056	regulation of calcineurin-mediated signaling	2/254	35/17913	0.0878273	0.66598	0.645897	2	493/23261	ATP2B4/CAMTA1
GO:2000310	regulation of NMDA receptor activity	2/254	35/17913	0.0878273	0.66598	0.645897	2	2048/1740	EPHB2/DLG2
GO:0030104	water homeostasis	3/254	74/17913	0.0878878	0.66598	0.645897	3	51763/26154/4645	INPP5K/ABCA12/MYO5B
GO:0060291	long-term synaptic potentiation	3/254	74/17913	0.0878878	0.66598	0.645897	3	2048/22941/85358	EPHB2/SHANK2/SHANK3
GO:0043405	regulation of MAP kinase activity	8/254	322/17913	0.0887373	0.66598	0.645897	8	9146/2048/51763/5606/5605/5608/2911/3356	HGS/EPHB2/INPP5K/MAP2K3/MAP2K2/MAP2K6/GRM1/HTR2A
GO:0072593	reactive oxygen species metabolic process	7/254	269/17913	0.0892013	0.66598	0.645897	7	493/7409/5547/575/1785/2053/4724	ATP2B4/VAV1/PRCP/ADGRB1/DNM2/EPHX2/NDUFS4
GO:0033135	regulation of peptidyl-serine phosphorylation	4/254	119/17913	0.089264	0.66598	0.645897	4	493/51763/10459/57521	ATP2B4/INPP5K/MAD2L2/RPTOR
GO:0009410	response to xenobiotic stimulus	7/254	270/17913	0.0905329	0.66598	0.645897	7	1869/55151/9101/1785/2053/3172/3356	E2F1/TMEM38B/USP8/DNM2/EPHX2/HNF4A/HTR2A
GO:0051648	vesicle localization	7/254	270/17913	0.0905329	0.66598	0.645897	7	9381/83696/10815/9699/1785/79953/3356	OTOF/TRAPPC9/CPLX1/RIMS2/DNM2/SYNDIG1/HTR2A
GO:0003014	renal system process	4/254	120/17913	0.09137	0.66598	0.645897	4	3675/51763/10391/4645	ITGA3/INPP5K/CORO2B/MYO5B
GO:0003091	renal water homeostasis	2/254	36/17913	0.0921553	0.66598	0.645897	2	51763/4645	INPP5K/MYO5B
GO:0015682	ferric iron transport	2/254	36/17913	0.0921553	0.66598	0.645897	2	22853/1785	LMTK2/DNM2
GO:0033572	transferrin transport	2/254	36/17913	0.0921553	0.66598	0.645897	2	22853/1785	LMTK2/DNM2
GO:0035872	nucleotide-binding domain, leucine rich repeat containing receptor signaling pathway	2/254	36/17913	0.0921553	0.66598	0.645897	2	55914/5608	ERBIN/MAP2K6
GO:0044058	regulation of digestive system process	2/254	36/17913	0.0921553	0.66598	0.645897	2	64241/64240	ABCG8/ABCG5
GO:0072512	trivalent inorganic cation transport	2/254	36/17913	0.0921553	0.66598	0.645897	2	22853/1785	LMTK2/DNM2
GO:0098801	regulation of renal system process	2/254	36/17913	0.0921553	0.66598	0.645897	2	51763/10391	INPP5K/CORO2B
GO:0048638	regulation of developmental growth	8/254	325/17913	0.092374	0.66598	0.645897	8	375790/7049/2017/9699/1785/23499/4593/51083	AGRN/TGFBR3/CTTN/RIMS2/DNM2/MACF1/MUSK/GAL
GO:0090090	negative regulation of canonical Wnt signaling pathway	5/254	169/17913	0.09302	0.66598	0.645897	5	10076/10459/23198/27303/5682	PTPRU/MAD2L2/PSME4/RBMS3/PSMA1
GO:0030516	regulation of axon extension	3/254	76/17913	0.0934222	0.66598	0.645897	3	2017/1785/23499	CTTN/DNM2/MACF1
GO:0070646	protein modification by small protein removal	7/254	273/17913	0.0945951	0.66598	0.645897	7	9146/580/23198/3054/9101/5682/84132	HGS/BARD1/PSME4/HCFC1/USP8/PSMA1/USP42
GO:0006941	striated muscle contraction	5/254	170/17913	0.0947949	0.66598	0.645897	5	5606/5608/55151/29119/5142	MAP2K3/MAP2K6/TMEM38B/CTNNA3/PDE4B
GO:0035270	endocrine system development	4/254	122/17913	0.0956528	0.66598	0.645897	4	654/2516/3172/23440	BMP6/NR5A1/HNF4A/OTP
GO:0062012	regulation of small molecule metabolic process	10/254	439/17913	0.0961146	0.66598	0.645897	10	64788/493/51763/51422/654/85300/23198/2053/5682/3356	LMF1/ATP2B4/INPP5K/PRKAG2/BMP6/ATCAY/PSME4/EPHX2/PSMA1/HTR2A
GO:0044091	membrane biogenesis	2/254	37/17913	0.0965442	0.66598	0.645897	2	2048/9379	EPHB2/NRXN2
GO:0045494	photoreceptor cell maintenance	2/254	37/17913	0.0965442	0.66598	0.645897	2	10083/94137	USH1C/RP1L1
GO:0051567	histone H3-K9 methylation	2/254	37/17913	0.0965442	0.66598	0.645897	2	5079/63976	PAX5/PRDM16
GO:0097120	receptor localization to synapse	2/254	37/17913	0.0965442	0.66598	0.645897	2	1740/10815	DLG2/CPLX1
GO:1901381	positive regulation of potassium ion transmembrane transport	2/254	37/17913	0.0965442	0.66598	0.645897	2	1785/51083	DNM2/GAL
GO:0045444	fat cell differentiation	6/254	222/17913	0.0968056	0.66598	0.645897	6	4041/2662/1869/148979/63976/3356	LRP5/GDF10/E2F1/GLIS1/PRDM16/HTR2A
GO:1903311	regulation of mRNA metabolic process	7/254	275/17913	0.0973589	0.66598	0.645897	7	131405/1869/580/23198/4869/83989/5682	TRIM71/E2F1/BARD1/PSME4/NPM1/FAM172A/PSMA1
GO:0007163	establishment or maintenance of cell polarity	5/254	172/17913	0.0983963	0.66598	0.645897	5	1045/55914/5754/10090/4134	CDX2/ERBIN/PTK7/UST/MAP4
GO:0001101	response to acid chemical	8/254	330/17913	0.0986236	0.66598	0.645897	8	493/1869/654/7049/5754/3141/57521/8648	ATP2B4/E2F1/BMP6/TGFBR3/PTK7/HLCS/RPTOR/NCOA1
GO:0048562	embryonic organ morphogenesis	7/254	276/17913	0.0987575	0.66598	0.645897	7	65009/57534/2048/10083/5079/5754/3203	NDRG4/MIB1/EPHB2/USH1C/PAX5/PTK7/HOXA6
GO:0010771	negative regulation of cell morphogenesis involved in differentiation	3/254	78/17913	0.0990967	0.66598	0.645897	3	2048/7225/26052	EPHB2/TRPC6/DNM3
GO:0034308	primary alcohol metabolic process	3/254	78/17913	0.0990967	0.66598	0.645897	3	654/151056/84532	BMP6/PLB1/ACSS1
GO:0042590	antigen processing and presentation of exogenous peptide antigen via MHC class I	3/254	78/17913	0.0990967	0.66598	0.645897	3	23198/5682/4012	PSME4/PSMA1/LNPEP
GO:0046434	organophosphate catabolic process	6/254	224/17913	0.0999529	0.66598	0.645897	6	51763/51422/5169/22978/5142/3356	INPP5K/PRKAG2/ENPP3/NT5C2/PDE4B/HTR2A
GO:0035023	regulation of Rho protein signal transduction	4/254	124/17913	0.100029	0.66598	0.645897	4	3675/7409/54922/5924	ITGA3/VAV1/RASIP1/RASGRF2
GO:1901615	organic hydroxy compound metabolic process	11/254	500/17913	0.100444	0.66598	0.645897	11	64788/51763/51422/654/29881/114883/151056/84532/25953/2053/7299	LMF1/INPP5K/PRKAG2/BMP6/NPC1L1/OSBPL9/PLB1/ACSS1/PNKD/EPHX2/TYR
GO:0007520	myoblast fusion	2/254	38/17913	0.100991	0.66598	0.645897	2	90342/575	FER1L5/ADGRB1
GO:0032350	regulation of hormone metabolic process	2/254	38/17913	0.100991	0.66598	0.645897	2	654/51083	BMP6/GAL
GO:0043277	apoptotic cell clearance	2/254	38/17913	0.100991	0.66598	0.645897	2	2219/575	FCN1/ADGRB1
GO:0045022	early endosome to late endosome transport	2/254	38/17913	0.100991	0.66598	0.645897	2	22853/5605	LMTK2/MAP2K2
GO:0072583	clathrin-dependent endocytosis	2/254	38/17913	0.100991	0.66598	0.645897	2	1785/9873	DNM2/FCHSD2
GO:0055074	calcium ion homeostasis	9/254	388/17913	0.10194	0.66598	0.645897	9	493/3062/7225/773/79054/55151/2911/2053/3356	ATP2B4/HCRTR2/TRPC6/CACNA1A/TRPM8/TMEM38B/GRM1/EPHX2/HTR2A
GO:0097581	lamellipodium organization	3/254	79/17913	0.101985	0.66598	0.645897	3	2017/1785/79647	CTTN/DNM2/AKIRIN1
GO:0099003	vesicle-mediated transport in synapse	5/254	174/17913	0.102066	0.66598	0.645897	5	9381/10815/9699/1785/3356	OTOF/CPLX1/RIMS2/DNM2/HTR2A
GO:1901292	nucleoside phosphate catabolic process	5/254	175/17913	0.103926	0.66598	0.645897	5	51422/5169/22978/5142/3356	PRKAG2/ENPP3/NT5C2/PDE4B/HTR2A
GO:0060359	response to ammonium ion	4/254	126/17913	0.104496	0.66598	0.645897	4	493/375790/1785/3356	ATP2B4/AGRN/DNM2/HTR2A
GO:2001023	regulation of response to drug	3/254	80/17913	0.104907	0.66598	0.645897	3	51083/8648/3356	GAL/NCOA1/HTR2A
GO:0006195	purine nucleotide catabolic process	2/254	39/17913	0.105495	0.66598	0.645897	2	22978/5142	NT5C2/PDE4B
GO:0009072	aromatic amino acid family metabolic process	2/254	39/17913	0.105495	0.66598	0.645897	2	80150/7299	ASRGL1/TYR
GO:1902116	negative regulation of organelle assembly	2/254	39/17913	0.105495	0.66598	0.645897	2	1785/4134	DNM2/MAP4
GO:0006486	protein glycosylation	6/254	228/17913	0.106408	0.66598	0.645897	6	57134/64788/374378/2651/433/29906	MAN1C1/LMF1/GALNT18/GCNT2/ASGR2/ST8SIA5
GO:0043413	macromolecule glycosylation	6/254	228/17913	0.106408	0.66598	0.645897	6	57134/64788/374378/2651/433/29906	MAN1C1/LMF1/GALNT18/GCNT2/ASGR2/ST8SIA5
GO:0017156	calcium ion regulated exocytosis	4/254	127/17913	0.106763	0.66598	0.645897	4	9381/10815/9699/3356	OTOF/CPLX1/RIMS2/HTR2A
GO:0072503	cellular divalent inorganic cation homeostasis	9/254	392/17913	0.106783	0.66598	0.645897	9	493/3062/7225/773/79054/55151/2911/2053/3356	ATP2B4/HCRTR2/TRPC6/CACNA1A/TRPM8/TMEM38B/GRM1/EPHX2/HTR2A
GO:0016525	negative regulation of angiogenesis	5/254	177/17913	0.107697	0.66598	0.645897	5	9146/55810/57556/575/112744	HGS/FOXJ2/SEMA6A/ADGRB1/IL17F
GO:0007045	cell-substrate adherens junction assembly	3/254	81/17913	0.107861	0.66598	0.645897	3	10391/2017/23499	CORO2B/CTTN/MACF1
GO:0048041	focal adhesion assembly	3/254	81/17913	0.107861	0.66598	0.645897	3	10391/2017/23499	CORO2B/CTTN/MACF1
GO:0055117	regulation of cardiac muscle contraction	3/254	81/17913	0.107861	0.66598	0.645897	3	55151/29119/5142	TMEM38B/CTNNA3/PDE4B
GO:0007369	gastrulation	5/254	178/17913	0.109607	0.66598	0.645897	5	3675/7709/2139/7290/3172	ITGA3/ZBTB17/EYA2/HIRA/HNF4A
GO:0061013	regulation of mRNA catabolic process	5/254	178/17913	0.109607	0.66598	0.645897	5	131405/1869/23198/4869/5682	TRIM71/E2F1/PSME4/NPM1/PSMA1
GO:0048286	lung alveolus development	2/254	40/17913	0.110051	0.66598	0.645897	2	26154/55151	ABCA12/TMEM38B
GO:2000273	positive regulation of signaling receptor activity	2/254	40/17913	0.110051	0.66598	0.645897	2	2048/85358	EPHB2/SHANK3
GO:0014855	striated muscle cell proliferation	3/254	82/17913	0.110848	0.66598	0.645897	3	65009/7049/79647	NDRG4/TGFBR3/AKIRIN1
GO:0048814	regulation of dendrite morphogenesis	3/254	82/17913	0.110848	0.66598	0.645897	3	7225/26052/85358	TRPC6/DNM3/SHANK3
GO:0007050	cell cycle arrest	6/254	231/17913	0.111389	0.66598	0.645897	6	7709/1869/51422/580/5608/57521	ZBTB17/E2F1/PRKAG2/BARD1/MAP2K6/RPTOR
GO:2000181	negative regulation of blood vessel morphogenesis	5/254	179/17913	0.111534	0.66598	0.645897	5	9146/55810/57556/575/112744	HGS/FOXJ2/SEMA6A/ADGRB1/IL17F
GO:0001558	regulation of cell growth	9/254	396/17913	0.111754	0.66598	0.645897	9	10459/2017/9699/1785/23499/51083/57521/3172/6586	MAD2L2/CTTN/RIMS2/DNM2/MACF1/GAL/RPTOR/HNF4A/SLIT3
GO:0032271	regulation of protein polymerization	5/254	180/17913	0.113477	0.66598	0.645897	5	3055/1496/2017/9873/57482	HCK/CTNNA2/CTTN/FCHSD2/KIAA1211
GO:0033173	calcineurin-NFAT signaling cascade	2/254	41/17913	0.114658	0.66598	0.645897	2	493/23261	ATP2B4/CAMTA1
GO:0045601	regulation of endothelial cell differentiation	2/254	41/17913	0.114658	0.66598	0.645897	2	55810/654	FOXJ2/BMP6
GO:0050432	catecholamine secretion	2/254	41/17913	0.114658	0.66598	0.645897	2	11188/3356	NISCH/HTR2A
GO:0098815	modulation of excitatory postsynaptic potential	2/254	41/17913	0.114658	0.66598	0.645897	2	9699/85358	RIMS2/SHANK3
GO:0098927	vesicle-mediated transport between endosomal compartments	2/254	41/17913	0.114658	0.66598	0.645897	2	22853/5605	LMTK2/MAP2K2
GO:2000649	regulation of sodium ion transmembrane transporter activity	2/254	41/17913	0.114658	0.66598	0.645897	2	1785/7402	DNM2/UTRN
GO:0003231	cardiac ventricle development	4/254	131/17913	0.116052	0.66598	0.645897	4	7049/5754/1785/6586	TGFBR3/PTK7/DNM2/SLIT3
GO:0045598	regulation of fat cell differentiation	4/254	131/17913	0.116052	0.66598	0.645897	4	4041/1869/63976/3356	LRP5/E2F1/PRDM16/HTR2A
GO:0009895	negative regulation of catabolic process	7/254	288/17913	0.116394	0.66598	0.645897	7	493/5768/10459/1869/54922/575/337867	ATP2B4/QSOX1/MAD2L2/E2F1/RASIP1/ADGRB1/UBAC2
GO:0090559	regulation of membrane permeability	3/254	84/17913	0.116915	0.66598	0.645897	3	1869/54922/2139	E2F1/RASIP1/EYA2
GO:0051480	regulation of cytosolic calcium ion concentration	7/254	289/17913	0.117934	0.66598	0.645897	7	493/3062/7225/773/55151/2911/3356	ATP2B4/HCRTR2/TRPC6/CACNA1A/TMEM38B/GRM1/HTR2A
GO:0070371	ERK1 and ERK2 cascade	7/254	289/17913	0.117934	0.66598	0.645897	7	65009/2048/6504/5605/57556/2651/3356	NDRG4/EPHB2/SLAMF1/MAP2K2/SEMA6A/GCNT2/HTR2A
GO:0010863	positive regulation of phospholipase C activity	2/254	42/17913	0.119314	0.66598	0.645897	2	115727/3356	RASGRP4/HTR2A
GO:0032456	endocytic recycling	2/254	42/17913	0.119314	0.66598	0.645897	2	65009/22853	NDRG4/LMTK2
GO:0035307	positive regulation of protein dephosphorylation	2/254	42/17913	0.119314	0.66598	0.645897	2	26051/23261	PPP1R16B/CAMTA1
GO:0061001	regulation of dendritic spine morphogenesis	2/254	42/17913	0.119314	0.66598	0.645897	2	26052/85358	DNM3/SHANK3
GO:0086004	regulation of cardiac muscle cell contraction	2/254	42/17913	0.119314	0.66598	0.645897	2	29119/5142	CTNNA3/PDE4B
GO:1900271	regulation of long-term synaptic potentiation	2/254	42/17913	0.119314	0.66598	0.645897	2	2048/85358	EPHB2/SHANK3
GO:0019216	regulation of lipid metabolic process	9/254	402/17913	0.11945	0.66598	0.645897	9	64788/51422/654/51083/2053/2516/8648/3172/3356	LMF1/PRKAG2/BMP6/GAL/EPHX2/NR5A1/NCOA1/HNF4A/HTR2A
GO:0031532	actin cytoskeleton reorganization	3/254	85/17913	0.119995	0.66598	0.645897	3	3055/5754/2017	HCK/PTK7/CTTN
GO:0018108	peptidyl-tyrosine phosphorylation	8/254	346/17913	0.120183	0.66598	0.645897	8	3055/2048/5606/22853/5605/5608/4593/3356	HCK/EPHB2/MAP2K3/LMTK2/MAP2K2/MAP2K6/MUSK/HTR2A
GO:0072659	protein localization to plasma membrane	6/254	237/17913	0.121699	0.66598	0.645897	6	3675/2048/51763/26154/8631/23499	ITGA3/EPHB2/INPP5K/ABCA12/SKAP1/MACF1
GO:0033138	positive regulation of peptidyl-serine phosphorylation	3/254	86/17913	0.123104	0.66598	0.645897	3	493/10459/57521	ATP2B4/MAD2L2/RPTOR
GO:0030509	BMP signaling pathway	4/254	134/17913	0.123244	0.66598	0.645897	4	3675/654/7049/23090	ITGA3/BMP6/TGFBR3/ZNF423
GO:0034332	adherens junction organization	4/254	134/17913	0.123244	0.66598	0.645897	4	10391/2017/3801/23499	CORO2B/CTTN/KIFC3/MACF1
GO:1902905	positive regulation of supramolecular fiber organization	5/254	185/17913	0.123434	0.66598	0.645897	5	3055/1496/2017/9873/57482	HCK/CTNNA2/CTTN/FCHSD2/KIAA1211
GO:0006893	Golgi to plasma membrane transport	2/254	43/17913	0.124016	0.66598	0.645897	2	1785/23499	DNM2/MACF1
GO:0031018	endocrine pancreas development	2/254	43/17913	0.124016	0.66598	0.645897	2	654/3172	BMP6/HNF4A
GO:0044060	regulation of endocrine process	2/254	43/17913	0.124016	0.66598	0.645897	2	654/51083	BMP6/GAL
GO:0045010	actin nucleation	2/254	43/17913	0.124016	0.66598	0.645897	2	1496/9873	CTNNA2/FCHSD2
GO:0071364	cellular response to epidermal growth factor stimulus	2/254	43/17913	0.124016	0.66598	0.645897	2	51763/8631	INPP5K/SKAP1
GO:1902743	regulation of lamellipodium organization	2/254	43/17913	0.124016	0.66598	0.645897	2	1785/79647	DNM2/AKIRIN1
GO:1990090	cellular response to nerve growth factor stimulus	2/254	43/17913	0.124016	0.66598	0.645897	2	1869/9101	E2F1/USP8
GO:0015849	organic acid transport	7/254	293/17913	0.124198	0.66598	0.645897	7	153201/51422/28965/5608/10815/8648/9123	SLC36A2/PRKAG2/SLC27A6/MAP2K6/CPLX1/NCOA1/SLC16A3
GO:0046942	carboxylic acid transport	7/254	293/17913	0.124198	0.66598	0.645897	7	153201/51422/28965/5608/10815/8648/9123	SLC36A2/PRKAG2/SLC27A6/MAP2K6/CPLX1/NCOA1/SLC16A3
GO:0070588	calcium ion transmembrane transport	7/254	293/17913	0.124198	0.66598	0.645897	7	493/7225/773/79054/55151/5142/3356	ATP2B4/TRPC6/CACNA1A/TRPM8/TMEM38B/PDE4B/HTR2A
GO:0018212	peptidyl-tyrosine modification	8/254	349/17913	0.124485	0.66598	0.645897	8	3055/2048/5606/22853/5605/5608/4593/3356	HCK/EPHB2/MAP2K3/LMTK2/MAP2K2/MAP2K6/MUSK/HTR2A
GO:0010977	negative regulation of neuron projection development	4/254	135/17913	0.125683	0.66598	0.645897	4	2048/146760/7225/26052	EPHB2/RTN4RL1/TRPC6/DNM3
GO:0051017	actin filament bundle assembly	4/254	136/17913	0.128142	0.66598	0.645897	4	10083/51763/10391/85358	USH1C/INPP5K/CORO2B/SHANK3
GO:0030071	regulation of mitotic metaphase/anaphase transition	2/254	44/17913	0.128763	0.66598	0.645897	2	10459/57520	MAD2L2/HECW2
GO:0043268	positive regulation of potassium ion transport	2/254	44/17913	0.128763	0.66598	0.645897	2	1785/51083	DNM2/GAL
GO:0051205	protein insertion into membrane	2/254	44/17913	0.128763	0.66598	0.645897	2	1869/65055	E2F1/REEP1
GO:0071827	plasma lipoprotein particle organization	2/254	44/17913	0.128763	0.66598	0.645897	2	5326/4018	PLAGL2/LPA
GO:0072523	purine-containing compound catabolic process	2/254	44/17913	0.128763	0.66598	0.645897	2	22978/5142	NT5C2/PDE4B
GO:1900274	regulation of phospholipase C activity	2/254	44/17913	0.128763	0.66598	0.645897	2	115727/3356	RASGRP4/HTR2A
GO:0070085	glycosylation	6/254	241/17913	0.128827	0.66598	0.645897	6	57134/64788/374378/2651/433/29906	MAN1C1/LMF1/GALNT18/GCNT2/ASGR2/ST8SIA5
GO:0006875	cellular metal ion homeostasis	10/254	467/17913	0.128947	0.66598	0.645897	10	493/3062/654/7225/773/79054/55151/2911/2053/3356	ATP2B4/HCRTR2/BMP6/TRPC6/CACNA1A/TRPM8/TMEM38B/GRM1/EPHX2/HTR2A
GO:0016197	endosomal transport	5/254	188/17913	0.129598	0.66598	0.645897	5	65009/9146/22853/7813/4645	NDRG4/HGS/LMTK2/EVI5/MYO5B
GO:0009411	response to UV	4/254	137/17913	0.130621	0.66598	0.645897	4	57654/4869/7299/51435	UVSSA/NPM1/TYR/SCARA3
GO:0035304	regulation of protein dephosphorylation	4/254	137/17913	0.130621	0.66598	0.645897	4	22853/26051/23261/10842	LMTK2/PPP1R16B/CAMTA1/PPP1R17
GO:0061572	actin filament bundle organization	4/254	137/17913	0.130621	0.66598	0.645897	4	10083/51763/10391/85358	USH1C/INPP5K/CORO2B/SHANK3
GO:0002758	innate immune response-activating signal transduction	7/254	298/17913	0.132264	0.66598	0.645897	7	2219/3055/55914/23198/5608/5682/23643	FCN1/HCK/ERBIN/PSME4/MAP2K6/PSMA1/LY96
GO:0051289	protein homotetramerization	3/254	89/17913	0.132605	0.66598	0.645897	3	7915/79054/5195	ALDH5A1/TRPM8/PEX14
GO:0072507	divalent inorganic cation homeostasis	9/254	412/17913	0.132901	0.66598	0.645897	9	493/3062/7225/773/79054/55151/2911/2053/3356	ATP2B4/HCRTR2/TRPC6/CACNA1A/TRPM8/TMEM38B/GRM1/EPHX2/HTR2A
GO:0001553	luteinization	1/254	10/17913	0.133114	0.66598	0.645897	1	2516	NR5A1
GO:0001574	ganglioside biosynthetic process	1/254	10/17913	0.133114	0.66598	0.645897	1	8869	ST3GAL5
GO:0006527	arginine catabolic process	1/254	10/17913	0.133114	0.66598	0.645897	1	493	ATP2B4
GO:0006930	substrate-dependent cell migration, cell extension	1/254	10/17913	0.133114	0.66598	0.645897	1	2017	CTTN
GO:0010749	regulation of nitric oxide mediated signal transduction	1/254	10/17913	0.133114	0.66598	0.645897	1	493	ATP2B4
GO:0010944	negative regulation of transcription by competitive promoter binding	1/254	10/17913	0.133114	0.66598	0.645897	1	10459	MAD2L2
GO:0010998	regulation of translational initiation by eIF2 alpha phosphorylation	1/254	10/17913	0.133114	0.66598	0.645897	1	4869	NPM1
GO:0014877	response to muscle inactivity involved in regulation of muscle adaptation	1/254	10/17913	0.133114	0.66598	0.645897	1	7402	UTRN
GO:0014894	response to denervation involved in regulation of muscle adaptation	1/254	10/17913	0.133114	0.66598	0.645897	1	7402	UTRN
GO:0018342	protein prenylation	1/254	10/17913	0.133114	0.66598	0.645897	1	4593	MUSK
GO:0031629	synaptic vesicle fusion to presynaptic active zone membrane	1/254	10/17913	0.133114	0.66598	0.645897	1	10815	CPLX1
GO:0032070	regulation of deoxyribonuclease activity	1/254	10/17913	0.133114	0.66598	0.645897	1	4869	NPM1
GO:0032308	positive regulation of prostaglandin secretion	1/254	10/17913	0.133114	0.66598	0.645897	1	5608	MAP2K6
GO:0032341	aldosterone metabolic process	1/254	10/17913	0.133114	0.66598	0.645897	1	654	BMP6
GO:0032342	aldosterone biosynthetic process	1/254	10/17913	0.133114	0.66598	0.645897	1	654	BMP6
GO:0034378	chylomicron assembly	1/254	10/17913	0.133114	0.66598	0.645897	1	5326	PLAGL2
GO:0035865	cellular response to potassium ion	1/254	10/17913	0.133114	0.66598	0.645897	1	1740	DLG2
GO:0044351	macropinocytosis	1/254	10/17913	0.133114	0.66598	0.645897	1	1785	DNM2
GO:0045945	positive regulation of transcription by RNA polymerase III	1/254	10/17913	0.133114	0.66598	0.645897	1	57521	RPTOR
GO:0046051	UTP metabolic process	1/254	10/17913	0.133114	0.66598	0.645897	1	4833	NME4
GO:0046710	GDP metabolic process	1/254	10/17913	0.133114	0.66598	0.645897	1	1740	DLG2
GO:0051006	positive regulation of lipoprotein lipase activity	1/254	10/17913	0.133114	0.66598	0.645897	1	64788	LMF1
GO:0060346	bone trabecula formation	1/254	10/17913	0.133114	0.66598	0.645897	1	133522	PPARGC1B
GO:0061299	retina vasculature morphogenesis in camera-type eye	1/254	10/17913	0.133114	0.66598	0.645897	1	4041	LRP5
GO:0070099	regulation of chemokine-mediated signaling pathway	1/254	10/17913	0.133114	0.66598	0.645897	1	6586	SLIT3
GO:0070862	negative regulation of protein exit from endoplasmic reticulum	1/254	10/17913	0.133114	0.66598	0.645897	1	337867	UBAC2
GO:0071281	cellular response to iron ion	1/254	10/17913	0.133114	0.66598	0.645897	1	654	BMP6
GO:0071313	cellular response to caffeine	1/254	10/17913	0.133114	0.66598	0.645897	1	55151	TMEM38B
GO:0071481	cellular response to X-ray	1/254	10/17913	0.133114	0.66598	0.645897	1	1785	DNM2
GO:0071501	cellular response to sterol depletion	1/254	10/17913	0.133114	0.66598	0.645897	1	29881	NPC1L1
GO:0071545	inositol phosphate catabolic process	1/254	10/17913	0.133114	0.66598	0.645897	1	51763	INPP5K
GO:0090030	regulation of steroid hormone biosynthetic process	1/254	10/17913	0.133114	0.66598	0.645897	1	654	BMP6
GO:0090179	planar cell polarity pathway involved in neural tube closure	1/254	10/17913	0.133114	0.66598	0.645897	1	5754	PTK7
GO:0090336	positive regulation of brown fat cell differentiation	1/254	10/17913	0.133114	0.66598	0.645897	1	63976	PRDM16
GO:0097354	prenylation	1/254	10/17913	0.133114	0.66598	0.645897	1	4593	MUSK
GO:0099550	trans-synaptic signaling, modulating synaptic transmission	1/254	10/17913	0.133114	0.66598	0.645897	1	2048	EPHB2
GO:1903800	positive regulation of production of miRNAs involved in gene silencing by miRNA	1/254	10/17913	0.133114	0.66598	0.645897	1	5605	MAP2K2
GO:2000049	positive regulation of cell-cell adhesion mediated by cadherin	1/254	10/17913	0.133114	0.66598	0.645897	1	10076	PTPRU
GO:2001135	regulation of endocytic recycling	1/254	10/17913	0.133114	0.66598	0.645897	1	65009	NDRG4
GO:0002067	glandular epithelial cell differentiation	2/254	45/17913	0.133551	0.66598	0.645897	2	654/3172	BMP6/HNF4A
GO:0002833	positive regulation of response to biotic stimulus	2/254	45/17913	0.133551	0.66598	0.645897	2	654/23643	BMP6/LY96
GO:0060412	ventricular septum morphogenesis	2/254	45/17913	0.133551	0.66598	0.645897	2	7049/6586	TGFBR3/SLIT3
GO:0072604	interleukin-6 secretion	2/254	45/17913	0.133551	0.66598	0.645897	2	84818/112744	IL17RC/IL17F
GO:1901068	guanosine-containing compound metabolic process	2/254	45/17913	0.133551	0.66598	0.645897	2	4833/1740	NME4/DLG2
GO:0006694	steroid biosynthetic process	5/254	190/17913	0.133783	0.66598	0.645897	5	51422/654/29881/114883/2516	PRKAG2/BMP6/NPC1L1/OSBPL9/NR5A1
GO:0048568	embryonic organ development	9/254	413/17913	0.134289	0.66598	0.645897	9	65009/57534/2048/1045/10083/5079/5754/8648/3203	NDRG4/MIB1/EPHB2/CDX2/USH1C/PAX5/PTK7/NCOA1/HOXA6
GO:0050773	regulation of dendrite development	4/254	139/17913	0.135639	0.66598	0.645897	4	7225/26052/114788/85358	TRPC6/DNM3/CSMD3/SHANK3
GO:0015908	fatty acid transport	3/254	90/17913	0.135827	0.66598	0.645897	3	51422/28965/5608	PRKAG2/SLC27A6/MAP2K6
GO:0034333	adherens junction assembly	3/254	90/17913	0.135827	0.66598	0.645897	3	10391/2017/23499	CORO2B/CTTN/MACF1
GO:0061387	regulation of extent of cell growth	3/254	90/17913	0.135827	0.66598	0.645897	3	2017/1785/23499	CTTN/DNM2/MACF1
GO:1901343	negative regulation of vasculature development	5/254	191/17913	0.135899	0.66598	0.645897	5	9146/55810/57556/575/112744	HGS/FOXJ2/SEMA6A/ADGRB1/IL17F
GO:0001837	epithelial to mesenchymal transition	4/254	140/17913	0.138176	0.66598	0.645897	4	10459/7049/2651/753	MAD2L2/TGFBR3/GCNT2/LDLRAD4
GO:0071804	cellular potassium ion transport	4/254	140/17913	0.138176	0.66598	0.645897	4	55151/1785/51083/3739	TMEM38B/DNM2/GAL/KCNA4
GO:0071805	potassium ion transmembrane transport	4/254	140/17913	0.138176	0.66598	0.645897	4	55151/1785/51083/3739	TMEM38B/DNM2/GAL/KCNA4
GO:1904064	positive regulation of cation transmembrane transport	4/254	140/17913	0.138176	0.66598	0.645897	4	2048/1785/51083/85358	EPHB2/DNM2/GAL/SHANK3
GO:0032369	negative regulation of lipid transport	2/254	46/17913	0.138379	0.66598	0.645897	2	64241/64240	ABCG8/ABCG5
GO:0060711	labyrinthine layer development	2/254	46/17913	0.138379	0.66598	0.645897	2	1045/8648	CDX2/NCOA1
GO:0060986	endocrine hormone secretion	2/254	46/17913	0.138379	0.66598	0.645897	2	654/51083	BMP6/GAL
GO:1900015	regulation of cytokine production involved in inflammatory response	2/254	46/17913	0.138379	0.66598	0.645897	2	84818/112744	IL17RC/IL17F
GO:1902099	regulation of metaphase/anaphase transition of cell cycle	2/254	46/17913	0.138379	0.66598	0.645897	2	10459/57520	MAD2L2/HECW2
GO:1990089	response to nerve growth factor	2/254	46/17913	0.138379	0.66598	0.645897	2	1869/9101	E2F1/USP8
GO:0001933	negative regulation of protein phosphorylation	9/254	416/17913	0.138497	0.66598	0.645897	9	2048/4041/51763/51422/54922/57556/4869/753/57521	EPHB2/LRP5/INPP5K/PRKAG2/RASIP1/SEMA6A/NPM1/LDLRAD4/RPTOR
GO:0009101	glycoprotein biosynthetic process	7/254	302/17913	0.1389	0.66598	0.645897	7	57134/64788/374378/2651/433/10090/29906	MAN1C1/LMF1/GALNT18/GCNT2/ASGR2/UST/ST8SIA5
GO:0000041	transition metal ion transport	3/254	91/17913	0.139077	0.66598	0.645897	3	22853/341208/1785	LMTK2/HEPHL1/DNM2
GO:0001523	retinoid metabolic process	3/254	91/17913	0.139077	0.66598	0.645897	3	375790/151056/9672	AGRN/PLB1/SDC3
GO:0010717	regulation of epithelial to mesenchymal transition	3/254	91/17913	0.139077	0.66598	0.645897	3	10459/2651/753	MAD2L2/GCNT2/LDLRAD4
GO:1904950	negative regulation of establishment of protein localization	5/254	193/17913	0.140174	0.66598	0.645897	5	51763/580/10391/59082/337867	INPP5K/BARD1/CORO2B/CARD18/UBAC2
GO:0031099	regeneration	5/254	194/17913	0.142334	0.66598	0.645897	5	10076/146760/7049/5792/79647	PTPRU/RTN4RL1/TGFBR3/PTPRF/AKIRIN1
GO:0007091	metaphase/anaphase transition of mitotic cell cycle	2/254	47/17913	0.143244	0.66598	0.645897	2	10459/57520	MAD2L2/HECW2
GO:0010965	regulation of mitotic sister chromatid separation	2/254	47/17913	0.143244	0.66598	0.645897	2	10459/57520	MAD2L2/HECW2
GO:0044764	multi-organism cellular process	2/254	47/17913	0.143244	0.66598	0.645897	2	5297/9873	PI4KA/FCHSD2
GO:0045815	positive regulation of gene expression, epigenetic	2/254	47/17913	0.143244	0.66598	0.645897	2	5435/25885	POLR2F/POLR1A
GO:0048168	regulation of neuronal synaptic plasticity	2/254	47/17913	0.143244	0.66598	0.645897	2	2048/85358	EPHB2/SHANK3
GO:0060042	retina morphogenesis in camera-type eye	2/254	47/17913	0.143244	0.66598	0.645897	2	4041/22882	LRP5/ZHX2
GO:0061383	trabecula morphogenesis	2/254	47/17913	0.143244	0.66598	0.645897	2	133522/7049	PPARGC1B/TGFBR3
GO:0070849	response to epidermal growth factor	2/254	47/17913	0.143244	0.66598	0.645897	2	51763/8631	INPP5K/SKAP1
GO:1903115	regulation of actin filament-based movement	2/254	47/17913	0.143244	0.66598	0.645897	2	29119/5142	CTNNA3/PDE4B
GO:0035690	cellular response to drug	8/254	362/17913	0.144042	0.66598	0.645897	8	493/375790/7225/55151/9101/1785/5142/8648	ATP2B4/AGRN/TRPC6/TMEM38B/USP8/DNM2/PDE4B/NCOA1
GO:0001867	complement activation, lectin pathway	1/254	11/17913	0.145413	0.66598	0.645897	1	2219	FCN1
GO:0003093	regulation of glomerular filtration	1/254	11/17913	0.145413	0.66598	0.645897	1	10391	CORO2B
GO:0006558	L-phenylalanine metabolic process	1/254	11/17913	0.145413	0.66598	0.645897	1	80150	ASRGL1
GO:0006559	L-phenylalanine catabolic process	1/254	11/17913	0.145413	0.66598	0.645897	1	80150	ASRGL1
GO:0006681	galactosylceramide metabolic process	1/254	11/17913	0.145413	0.66598	0.645897	1	7915	ALDH5A1
GO:0006853	carnitine shuttle	1/254	11/17913	0.145413	0.66598	0.645897	1	51422	PRKAG2
GO:0006991	response to sterol depletion	1/254	11/17913	0.145413	0.66598	0.645897	1	29881	NPC1L1
GO:0007216	G protein-coupled glutamate receptor signaling pathway	1/254	11/17913	0.145413	0.66598	0.645897	1	2911	GRM1
GO:0009143	nucleoside triphosphate catabolic process	1/254	11/17913	0.145413	0.66598	0.645897	1	5169	ENPP3
GO:0014820	tonic smooth muscle contraction	1/254	11/17913	0.145413	0.66598	0.645897	1	3356	HTR2A
GO:0014870	response to muscle inactivity	1/254	11/17913	0.145413	0.66598	0.645897	1	7402	UTRN
GO:0019042	viral latency	1/254	11/17913	0.145413	0.66598	0.645897	1	3054	HCFC1
GO:0019321	pentose metabolic process	1/254	11/17913	0.145413	0.66598	0.645897	1	55277	FGGY
GO:0019373	epoxygenase P450 pathway	1/254	11/17913	0.145413	0.66598	0.645897	1	2053	EPHX2
GO:0021670	lateral ventricle development	1/254	11/17913	0.145413	0.66598	0.645897	1	5079	PAX5
GO:0030948	negative regulation of vascular endothelial growth factor receptor signaling pathway	1/254	11/17913	0.145413	0.66598	0.645897	1	9146	HGS
GO:0031507	heterochromatin assembly	1/254	11/17913	0.145413	0.66598	0.645897	1	22893	BAHD1
GO:0031915	positive regulation of synaptic plasticity	1/254	11/17913	0.145413	0.66598	0.645897	1	2048	EPHB2
GO:0032306	regulation of prostaglandin secretion	1/254	11/17913	0.145413	0.66598	0.645897	1	5608	MAP2K6
GO:0032463	negative regulation of protein homooligomerization	1/254	11/17913	0.145413	0.66598	0.645897	1	5195	PEX14
GO:0032490	detection of molecule of bacterial origin	1/254	11/17913	0.145413	0.66598	0.645897	1	23643	LY96
GO:0033632	regulation of cell-cell adhesion mediated by integrin	1/254	11/17913	0.145413	0.66598	0.645897	1	8631	SKAP1
GO:0033700	phospholipid efflux	1/254	11/17913	0.145413	0.66598	0.645897	1	26154	ABCA12
GO:0043201	response to leucine	1/254	11/17913	0.145413	0.66598	0.645897	1	57521	RPTOR
GO:0045217	cell-cell junction maintenance	1/254	11/17913	0.145413	0.66598	0.645897	1	3801	KIFC3
GO:0046886	positive regulation of hormone biosynthetic process	1/254	11/17913	0.145413	0.66598	0.645897	1	654	BMP6
GO:0046929	negative regulation of neurotransmitter secretion	1/254	11/17913	0.145413	0.66598	0.645897	1	25953	PNKD
GO:0048875	chemical homeostasis within a tissue	1/254	11/17913	0.145413	0.66598	0.645897	1	26154	ABCA12
GO:0051573	negative regulation of histone H3-K9 methylation	1/254	11/17913	0.145413	0.66598	0.645897	1	5079	PAX5
GO:0055091	phospholipid homeostasis	1/254	11/17913	0.145413	0.66598	0.645897	1	3172	HNF4A
GO:0060837	blood vessel endothelial cell differentiation	1/254	11/17913	0.145413	0.66598	0.645897	1	55810	FOXJ2
GO:0061365	positive regulation of triglyceride lipase activity	1/254	11/17913	0.145413	0.66598	0.645897	1	64788	LMF1
GO:0070278	extracellular matrix constituent secretion	1/254	11/17913	0.145413	0.66598	0.645897	1	55151	TMEM38B
GO:0071679	commissural neuron axon guidance	1/254	11/17913	0.145413	0.66598	0.645897	1	2048	EPHB2
GO:0086023	adenylate cyclase-activating adrenergic receptor signaling pathway involved in heart process	1/254	11/17913	0.145413	0.66598	0.645897	1	493	ATP2B4
GO:0090042	tubulin deacetylation	1/254	11/17913	0.145413	0.66598	0.645897	1	10129	FRY
GO:0090178	regulation of establishment of planar polarity involved in neural tube closure	1/254	11/17913	0.145413	0.66598	0.645897	1	5754	PTK7
GO:0098703	calcium ion import across plasma membrane	1/254	11/17913	0.145413	0.66598	0.645897	1	493	ATP2B4
GO:0098814	spontaneous synaptic transmission	1/254	11/17913	0.145413	0.66598	0.645897	1	9699	RIMS2
GO:0099500	vesicle fusion to plasma membrane	1/254	11/17913	0.145413	0.66598	0.645897	1	10815	CPLX1
GO:0099566	regulation of postsynaptic cytosolic calcium ion concentration	1/254	11/17913	0.145413	0.66598	0.645897	1	2911	GRM1
GO:0106072	negative regulation of adenylate cyclase-activating G protein-coupled receptor signaling pathway	1/254	11/17913	0.145413	0.66598	0.645897	1	493	ATP2B4
GO:1901077	regulation of relaxation of muscle	1/254	11/17913	0.145413	0.66598	0.645897	1	5142	PDE4B
GO:1901660	calcium ion export	1/254	11/17913	0.145413	0.66598	0.645897	1	493	ATP2B4
GO:1902221	erythrose 4-phosphate/phosphoenolpyruvate family amino acid metabolic process	1/254	11/17913	0.145413	0.66598	0.645897	1	80150	ASRGL1
GO:1902222	erythrose 4-phosphate/phosphoenolpyruvate family amino acid catabolic process	1/254	11/17913	0.145413	0.66598	0.645897	1	80150	ASRGL1
GO:1905383	protein localization to presynapse	1/254	11/17913	0.145413	0.66598	0.645897	1	1740	DLG2
GO:1905941	positive regulation of gonad development	1/254	11/17913	0.145413	0.66598	0.645897	1	2516	NR5A1
GO:2000344	positive regulation of acrosome reaction	1/254	11/17913	0.145413	0.66598	0.645897	1	151056	PLB1
GO:0051261	protein depolymerization	3/254	93/17913	0.145654	0.66598	0.645897	3	57701/57553/57482	NCKAP5L/MICAL3/KIAA1211
GO:0019933	cAMP-mediated signaling	4/254	143/17913	0.145904	0.66598	0.645897	4	493/9699/51083/4724	ATP2B4/RIMS2/GAL/NDUFS4
GO:0060627	regulation of vesicle-mediated transport	10/254	480/17913	0.146028	0.66598	0.645897	10	65009/3055/9146/57534/5605/10815/9699/1785/57111/3356	NDRG4/HCK/HGS/MIB1/MAP2K2/CPLX1/RIMS2/DNM2/RAB25/HTR2A
GO:0090257	regulation of muscle system process	6/254	251/17913	0.147498	0.66598	0.645897	6	493/2017/55151/29119/5142/7402	ATP2B4/CTTN/TMEM38B/CTNNA3/PDE4B/UTRN
GO:0030042	actin filament depolymerization	2/254	48/17913	0.148146	0.66598	0.645897	2	57553/57482	MICAL3/KIAA1211
GO:0031103	axon regeneration	2/254	48/17913	0.148146	0.66598	0.645897	2	146760/5792	RTN4RL1/PTPRF
GO:0042220	response to cocaine	2/254	48/17913	0.148146	0.66598	0.645897	2	1785/3356	DNM2/HTR2A
GO:0061647	histone H3-K9 modification	2/254	48/17913	0.148146	0.66598	0.645897	2	5079/63976	PAX5/PRDM16
GO:0071825	protein-lipid complex subunit organization	2/254	48/17913	0.148146	0.66598	0.645897	2	5326/4018	PLAGL2/LPA
GO:0006665	sphingolipid metabolic process	4/254	144/17913	0.148517	0.66598	0.645897	4	7915/285362/8869/29906	ALDH5A1/SUMF1/ST3GAL5/ST8SIA5
GO:0043467	regulation of generation of precursor metabolites and energy	4/254	144/17913	0.148517	0.66598	0.645897	4	51763/51422/63976/3356	INPP5K/PRKAG2/PRDM16/HTR2A
GO:0007030	Golgi organization	3/254	94/17913	0.14898	0.66598	0.645897	3	5605/3801/1785	MAP2K2/KIFC3/DNM2
GO:0032231	regulation of actin filament bundle assembly	3/254	94/17913	0.14898	0.66598	0.645897	3	51763/10391/85358	INPP5K/CORO2B/SHANK3
GO:0060191	regulation of lipase activity	3/254	94/17913	0.14898	0.66598	0.645897	3	64788/115727/3356	LMF1/RASGRP4/HTR2A
GO:0060996	dendritic spine development	3/254	94/17913	0.14898	0.66598	0.645897	3	2048/26052/85358	EPHB2/DNM3/SHANK3
GO:0050806	positive regulation of synaptic transmission	4/254	145/17913	0.151148	0.66598	0.645897	4	2048/22941/9699/85358	EPHB2/SHANK2/RIMS2/SHANK3
GO:0051650	establishment of vesicle localization	6/254	253/17913	0.151373	0.66598	0.645897	6	9381/83696/10815/9699/1785/3356	OTOF/TRAPPC9/CPLX1/RIMS2/DNM2/HTR2A
GO:0002474	antigen processing and presentation of peptide antigen via MHC class I	3/254	95/17913	0.152331	0.66598	0.645897	3	23198/5682/4012	PSME4/PSMA1/LNPEP
GO:0042472	inner ear morphogenesis	3/254	95/17913	0.152331	0.66598	0.645897	3	2048/10083/5754	EPHB2/USH1C/PTK7
GO:0002534	cytokine production involved in inflammatory response	2/254	49/17913	0.153081	0.66598	0.645897	2	84818/112744	IL17RC/IL17F
GO:0007029	endoplasmic reticulum organization	2/254	49/17913	0.153081	0.66598	0.645897	2	65055/55151	REEP1/TMEM38B
GO:0044784	metaphase/anaphase transition of cell cycle	2/254	49/17913	0.153081	0.66598	0.645897	2	10459/57520	MAD2L2/HECW2
GO:0051306	mitotic sister chromatid separation	2/254	49/17913	0.153081	0.66598	0.645897	2	10459/57520	MAD2L2/HECW2
GO:1905515	non-motile cilium assembly	2/254	49/17913	0.153081	0.66598	0.645897	2	1785/4134	DNM2/MAP4
GO:0034764	positive regulation of transmembrane transport	5/254	199/17913	0.153346	0.66598	0.645897	5	2048/7225/1785/51083/85358	EPHB2/TRPC6/DNM2/GAL/SHANK3
GO:0048762	mesenchymal cell differentiation	5/254	199/17913	0.153346	0.66598	0.645897	5	10459/7049/2651/753/83989	MAD2L2/TGFBR3/GCNT2/LDLRAD4/FAM172A
GO:0007204	positive regulation of cytosolic calcium ion concentration	6/254	255/17913	0.155294	0.66598	0.645897	6	493/7225/773/55151/2911/3356	ATP2B4/TRPC6/CACNA1A/TMEM38B/GRM1/HTR2A
GO:0009612	response to mechanical stimulus	5/254	200/17913	0.15559	0.66598	0.645897	5	654/9379/943/85358/3356	BMP6/NRXN2/TNFRSF8/SHANK3/HTR2A
GO:0030073	insulin secretion	5/254	200/17913	0.15559	0.66598	0.645897	5	773/10815/9699/51083/3172	CACNA1A/CPLX1/RIMS2/GAL/HNF4A
GO:0006942	regulation of striated muscle contraction	3/254	96/17913	0.155705	0.66598	0.645897	3	55151/29119/5142	TMEM38B/CTNNA3/PDE4B
GO:0007044	cell-substrate junction assembly	3/254	96/17913	0.155705	0.66598	0.645897	3	10391/2017/23499	CORO2B/CTTN/MACF1
GO:0046928	regulation of neurotransmitter secretion	3/254	96/17913	0.155705	0.66598	0.645897	3	10815/25953/3356	CPLX1/PNKD/HTR2A
GO:0000187	activation of MAPK activity	4/254	147/17913	0.156462	0.66598	0.645897	4	5606/5605/5608/2911	MAP2K3/MAP2K2/MAP2K6/GRM1
GO:0071772	response to BMP	4/254	147/17913	0.156462	0.66598	0.645897	4	3675/654/7049/23090	ITGA3/BMP6/TGFBR3/ZNF423
GO:0071773	cellular response to BMP stimulus	4/254	147/17913	0.156462	0.66598	0.645897	4	3675/654/7049/23090	ITGA3/BMP6/TGFBR3/ZNF423
GO:0000098	sulfur amino acid catabolic process	1/254	12/17913	0.157538	0.66598	0.645897	1	339896	GADL1
GO:0002862	negative regulation of inflammatory response to antigenic stimulus	1/254	12/17913	0.157538	0.66598	0.645897	1	5682	PSMA1
GO:0006069	ethanol oxidation	1/254	12/17913	0.157538	0.66598	0.645897	1	84532	ACSS1
GO:0006390	mitochondrial transcription	1/254	12/17913	0.157538	0.66598	0.645897	1	133522	PPARGC1B
GO:0006491	N-glycan processing	1/254	12/17913	0.157538	0.66598	0.645897	1	57134	MAN1C1
GO:0006983	ER overload response	1/254	12/17913	0.157538	0.66598	0.645897	1	83734	ATG10
GO:0010454	negative regulation of cell fate commitment	1/254	12/17913	0.157538	0.66598	0.645897	1	148979	GLIS1
GO:0010826	negative regulation of centrosome duplication	1/254	12/17913	0.157538	0.66598	0.645897	1	4869	NPM1
GO:0016558	protein import into peroxisome matrix	1/254	12/17913	0.157538	0.66598	0.645897	1	5195	PEX14
GO:0018158	protein oxidation	1/254	12/17913	0.157538	0.66598	0.645897	1	285362	SUMF1
GO:0019374	galactolipid metabolic process	1/254	12/17913	0.157538	0.66598	0.645897	1	7915	ALDH5A1
GO:0030208	dermatan sulfate biosynthetic process	1/254	12/17913	0.157538	0.66598	0.645897	1	10090	UST
GO:0033004	negative regulation of mast cell activation	1/254	12/17913	0.157538	0.66598	0.645897	1	5169	ENPP3
GO:0034309	primary alcohol biosynthetic process	1/254	12/17913	0.157538	0.66598	0.645897	1	654	BMP6
GO:0035092	sperm chromatin condensation	1/254	12/17913	0.157538	0.66598	0.645897	1	23198	PSME4
GO:0035627	ceramide transport	1/254	12/17913	0.157538	0.66598	0.645897	1	26154	ABCA12
GO:0042738	exogenous drug catabolic process	1/254	12/17913	0.157538	0.66598	0.645897	1	1580	CYP4B1
GO:0043922	negative regulation by host of viral transcription	1/254	12/17913	0.157538	0.66598	0.645897	1	51763	INPP5K
GO:0045161	neuronal ion channel clustering	1/254	12/17913	0.157538	0.66598	0.645897	1	375790	AGRN
GO:0045602	negative regulation of endothelial cell differentiation	1/254	12/17913	0.157538	0.66598	0.645897	1	55810	FOXJ2
GO:0045869	negative regulation of single stranded viral RNA replication via double stranded DNA intermediate	1/254	12/17913	0.157538	0.66598	0.645897	1	51763	INPP5K
GO:0048642	negative regulation of skeletal muscle tissue development	1/254	12/17913	0.157538	0.66598	0.645897	1	79647	AKIRIN1
GO:0051451	myoblast migration	1/254	12/17913	0.157538	0.66598	0.645897	1	79647	AKIRIN1
GO:0051798	positive regulation of hair follicle development	1/254	12/17913	0.157538	0.66598	0.645897	1	51083	GAL
GO:0060391	positive regulation of SMAD protein signal transduction	1/254	12/17913	0.157538	0.66598	0.645897	1	654	BMP6
GO:0060394	negative regulation of pathway-restricted SMAD protein phosphorylation	1/254	12/17913	0.157538	0.66598	0.645897	1	753	LDLRAD4
GO:0070365	hepatocyte differentiation	1/254	12/17913	0.157538	0.66598	0.645897	1	3172	HNF4A
GO:0071073	positive regulation of phospholipid biosynthetic process	1/254	12/17913	0.157538	0.66598	0.645897	1	3356	HTR2A
GO:0071257	cellular response to electrical stimulus	1/254	12/17913	0.157538	0.66598	0.645897	1	2911	GRM1
GO:0071340	skeletal muscle acetylcholine-gated channel clustering	1/254	12/17913	0.157538	0.66598	0.645897	1	4593	MUSK
GO:0072578	neurotransmitter-gated ion channel clustering	1/254	12/17913	0.157538	0.66598	0.645897	1	85358	SHANK3
GO:0090177	establishment of planar polarity involved in neural tube closure	1/254	12/17913	0.157538	0.66598	0.645897	1	5754	PTK7
GO:0098885	modification of postsynaptic actin cytoskeleton	1/254	12/17913	0.157538	0.66598	0.645897	1	1496	CTNNA2
GO:0099633	protein localization to postsynaptic specialization membrane	1/254	12/17913	0.157538	0.66598	0.645897	1	1740	DLG2
GO:0099640	axo-dendritic protein transport	1/254	12/17913	0.157538	0.66598	0.645897	1	1740	DLG2
GO:0099645	neurotransmitter receptor localization to postsynaptic specialization membrane	1/254	12/17913	0.157538	0.66598	0.645897	1	1740	DLG2
GO:1902656	calcium ion import into cytosol	1/254	12/17913	0.157538	0.66598	0.645897	1	493	ATP2B4
GO:1905461	positive regulation of vascular associated smooth muscle cell apoptotic process	1/254	12/17913	0.157538	0.66598	0.645897	1	1871	E2F3
GO:0006470	protein dephosphorylation	7/254	313/17913	0.157961	0.66598	0.645897	7	10076/22853/2139/26051/23261/5792/10842	PTPRU/LMTK2/EYA2/PPP1R16B/CAMTA1/PTPRF/PPP1R17
GO:0051966	regulation of synaptic transmission, glutamatergic	2/254	50/17913	0.158047	0.66598	0.645897	2	85358/3356	SHANK3/HTR2A
GO:0015711	organic anion transport	9/254	430/17913	0.159016	0.66598	0.645897	9	153201/51422/26154/28965/5608/10815/64241/8648/9123	SLC36A2/PRKAG2/ABCA12/SLC27A6/MAP2K6/CPLX1/ABCG8/NCOA1/SLC16A3
GO:0016101	diterpenoid metabolic process	3/254	97/17913	0.159103	0.66598	0.645897	3	375790/151056/9672	AGRN/PLB1/SDC3
GO:0120162	positive regulation of cold-induced thermogenesis	3/254	97/17913	0.159103	0.66598	0.645897	3	133522/79054/63976	PPARGC1B/TRPM8/PRDM16
GO:1901989	positive regulation of cell cycle phase transition	3/254	97/17913	0.159103	0.66598	0.645897	3	5890/4869/57521	RAD51B/NPM1/RPTOR
GO:0044839	cell cycle G2/M phase transition	6/254	257/17913	0.159259	0.66598	0.645897	6	10083/5890/23198/4869/1785/5682	USH1C/RAD51B/PSME4/NPM1/DNM2/PSMA1
GO:0060485	mesenchyme development	6/254	258/17913	0.161258	0.66598	0.645897	6	10459/7049/2651/5754/753/83989	MAD2L2/TGFBR3/GCNT2/PTK7/LDLRAD4/FAM172A
GO:0045089	positive regulation of innate immune response	8/254	373/17913	0.161708	0.66598	0.645897	8	2219/3055/7409/55914/23198/5608/5682/23643	FCN1/HCK/VAV1/ERBIN/PSME4/MAP2K6/PSMA1/LY96
GO:0043266	regulation of potassium ion transport	3/254	98/17913	0.162524	0.66598	0.645897	3	1785/51083/3356	DNM2/GAL/HTR2A
GO:0001954	positive regulation of cell-matrix adhesion	2/254	51/17913	0.163044	0.66598	0.645897	2	8631/7402	SKAP1/UTRN
GO:0006383	transcription by RNA polymerase III	2/254	51/17913	0.163044	0.66598	0.645897	2	5435/57521	POLR2F/RPTOR
GO:0045668	negative regulation of osteoblast differentiation	2/254	51/17913	0.163044	0.66598	0.645897	2	4041/2662	LRP5/GDF10
GO:0045744	negative regulation of G protein-coupled receptor signaling pathway	2/254	51/17913	0.163044	0.66598	0.645897	2	493/1785	ATP2B4/DNM2
GO:0046579	positive regulation of Ras protein signal transduction	2/254	51/17913	0.163044	0.66598	0.645897	2	7409/115727	VAV1/RASGRP4
GO:0048146	positive regulation of fibroblast proliferation	2/254	51/17913	0.163044	0.66598	0.645897	2	1869/4724	E2F1/NDUFS4
GO:0050885	neuromuscular process controlling balance	2/254	51/17913	0.163044	0.66598	0.645897	2	10083/23261	USH1C/CAMTA1
GO:0050999	regulation of nitric-oxide synthase activity	2/254	51/17913	0.163044	0.66598	0.645897	2	493/1785	ATP2B4/DNM2
GO:0048705	skeletal system morphogenesis	5/254	204/17913	0.164702	0.66598	0.645897	5	4041/5079/654/133522/3203	LRP5/PAX5/BMP6/PPARGC1B/HOXA6
GO:0048545	response to steroid hormone	8/254	375/17913	0.165025	0.66598	0.645897	8	10076/654/133522/9101/2516/8648/3172/6586	PTPRU/BMP6/PPARGC1B/USP8/NR5A1/NCOA1/HNF4A/SLIT3
GO:0010721	negative regulation of cell development	7/254	317/17913	0.165177	0.66598	0.645897	7	57534/2048/146760/7225/26052/51083/22882	MIB1/EPHB2/RTN4RL1/TRPC6/DNM3/GAL/ZHX2
GO:0051495	positive regulation of cytoskeleton organization	5/254	205/17913	0.167013	0.66598	0.645897	5	3055/1496/2017/9873/57482	HCK/CTNNA2/CTTN/FCHSD2/KIAA1211
GO:0021879	forebrain neuron differentiation	2/254	52/17913	0.168069	0.66598	0.645897	2	85358/23440	SHANK3/OTP
GO:0048016	inositol phosphate-mediated signaling	2/254	52/17913	0.168069	0.66598	0.645897	2	493/23261	ATP2B4/CAMTA1
GO:0048747	muscle fiber development	2/254	52/17913	0.168069	0.66598	0.645897	2	2318/124857	FLNC/WFIKKN2
GO:0097345	mitochondrial outer membrane permeabilization	2/254	52/17913	0.168069	0.66598	0.645897	2	1869/2139	E2F1/EYA2
GO:1905818	regulation of chromosome separation	2/254	52/17913	0.168069	0.66598	0.645897	2	10459/57520	MAD2L2/HECW2
GO:0002218	activation of innate immune response	7/254	319/17913	0.168839	0.66598	0.645897	7	2219/3055/55914/23198/5608/5682/23643	FCN1/HCK/ERBIN/PSME4/MAP2K6/PSMA1/LY96
GO:0071216	cellular response to biotic stimulus	5/254	206/17913	0.169337	0.66598	0.645897	5	3055/654/83734/5142/23643	HCK/BMP6/ATG10/PDE4B/LY96
GO:0001841	neural tube formation	3/254	100/17913	0.16943	0.66598	0.645897	3	57534/131405/5754	MIB1/TRIM71/PTK7
GO:0002679	respiratory burst involved in defense response	1/254	13/17913	0.169492	0.66598	0.645897	1	3055	HCK
GO:0006089	lactate metabolic process	1/254	13/17913	0.169492	0.66598	0.645897	1	25953	PNKD
GO:0006705	mineralocorticoid biosynthetic process	1/254	13/17913	0.169492	0.66598	0.645897	1	654	BMP6
GO:0007183	SMAD protein complex assembly	1/254	13/17913	0.169492	0.66598	0.645897	1	753	LDLRAD4
GO:0008212	mineralocorticoid metabolic process	1/254	13/17913	0.169492	0.66598	0.645897	1	654	BMP6
GO:0009650	UV protection	1/254	13/17913	0.169492	0.66598	0.645897	1	51435	SCARA3
GO:0014745	negative regulation of muscle adaptation	1/254	13/17913	0.169492	0.66598	0.645897	1	493	ATP2B4
GO:0014842	regulation of skeletal muscle satellite cell proliferation	1/254	13/17913	0.169492	0.66598	0.645897	1	79647	AKIRIN1
GO:0021535	cell migration in hindbrain	1/254	13/17913	0.169492	0.66598	0.645897	1	1496	CTNNA2
GO:0021554	optic nerve development	1/254	13/17913	0.169492	0.66598	0.645897	1	2048	EPHB2
GO:0030205	dermatan sulfate metabolic process	1/254	13/17913	0.169492	0.66598	0.645897	1	10090	UST
GO:0030836	positive regulation of actin filament depolymerization	1/254	13/17913	0.169492	0.66598	0.645897	1	57482	KIAA1211
GO:0032530	regulation of microvillus organization	1/254	13/17913	0.169492	0.66598	0.645897	1	10083	USH1C
GO:0032536	regulation of cell projection size	1/254	13/17913	0.169492	0.66598	0.645897	1	10083	USH1C
GO:0034331	cell junction maintenance	1/254	13/17913	0.169492	0.66598	0.645897	1	3801	KIFC3
GO:0034374	low-density lipoprotein particle remodeling	1/254	13/17913	0.169492	0.66598	0.645897	1	4018	LPA
GO:0035020	regulation of Rac protein signal transduction	1/254	13/17913	0.169492	0.66598	0.645897	1	1785	DNM2
GO:0038007	netrin-activated signaling pathway	1/254	13/17913	0.169492	0.66598	0.645897	1	90249	UNC5A
GO:0042635	positive regulation of hair cycle	1/254	13/17913	0.169492	0.66598	0.645897	1	51083	GAL
GO:0048308	organelle inheritance	1/254	13/17913	0.169492	0.66598	0.645897	1	5605	MAP2K2
GO:0048311	mitochondrion distribution	1/254	13/17913	0.169492	0.66598	0.645897	1	85300	ATCAY
GO:0048313	Golgi inheritance	1/254	13/17913	0.169492	0.66598	0.645897	1	5605	MAP2K2
GO:0048681	negative regulation of axon regeneration	1/254	13/17913	0.169492	0.66598	0.645897	1	146760	RTN4RL1
GO:0050872	white fat cell differentiation	1/254	13/17913	0.169492	0.66598	0.645897	1	63976	PRDM16
GO:0050966	detection of mechanical stimulus involved in sensory perception of pain	1/254	13/17913	0.169492	0.66598	0.645897	1	3356	HTR2A
GO:0051001	negative regulation of nitric-oxide synthase activity	1/254	13/17913	0.169492	0.66598	0.645897	1	493	ATP2B4
GO:0051917	regulation of fibrinolysis	1/254	13/17913	0.169492	0.66598	0.645897	1	7056	THBD
GO:0060347	heart trabecula formation	1/254	13/17913	0.169492	0.66598	0.645897	1	7049	TGFBR3
GO:0061000	negative regulation of dendritic spine development	1/254	13/17913	0.169492	0.66598	0.645897	1	26052	DNM3
GO:0061430	bone trabecula morphogenesis	1/254	13/17913	0.169492	0.66598	0.645897	1	133522	PPARGC1B
GO:0070431	nucleotide-binding oligomerization domain containing 2 signaling pathway	1/254	13/17913	0.169492	0.66598	0.645897	1	55914	ERBIN
GO:0071415	cellular response to purine-containing compound	1/254	13/17913	0.169492	0.66598	0.645897	1	55151	TMEM38B
GO:0098877	neurotransmitter receptor transport to plasma membrane	1/254	13/17913	0.169492	0.66598	0.645897	1	10815	CPLX1
GO:0098969	neurotransmitter receptor transport to postsynaptic membrane	1/254	13/17913	0.169492	0.66598	0.645897	1	10815	CPLX1
GO:1901070	guanosine-containing compound biosynthetic process	1/254	13/17913	0.169492	0.66598	0.645897	1	4833	NME4
GO:1904293	negative regulation of ERAD pathway	1/254	13/17913	0.169492	0.66598	0.645897	1	337867	UBAC2
GO:1905516	positive regulation of fertilization	1/254	13/17913	0.169492	0.66598	0.645897	1	151056	PLB1
GO:2000194	regulation of female gonad development	1/254	13/17913	0.169492	0.66598	0.645897	1	2516	NR5A1
GO:2001034	positive regulation of double-strand break repair via nonhomologous end joining	1/254	13/17913	0.169492	0.66598	0.645897	1	10459	MAD2L2
GO:0009132	nucleoside diphosphate metabolic process	4/254	153/17913	0.172812	0.66598	0.645897	4	4833/51422/1740/3356	NME4/PRKAG2/DLG2/HTR2A
GO:0019233	sensory perception of pain	3/254	101/17913	0.172915	0.66598	0.645897	3	1740/2911/3356	DLG2/GRM1/HTR2A
GO:0035335	peptidyl-tyrosine dephosphorylation	3/254	101/17913	0.172915	0.66598	0.645897	3	10076/2139/5792	PTPRU/EYA2/PTPRF
GO:1903426	regulation of reactive oxygen species biosynthetic process	3/254	101/17913	0.172915	0.66598	0.645897	3	493/575/1785	ATP2B4/ADGRB1/DNM2
GO:0000768	syncytium formation by plasma membrane fusion	2/254	53/17913	0.173119	0.66598	0.645897	2	90342/575	FER1L5/ADGRB1
GO:0006336	DNA replication-independent nucleosome assembly	2/254	53/17913	0.173119	0.66598	0.645897	2	4869/7290	NPM1/HIRA
GO:0006968	cellular defense response	2/254	53/17913	0.173119	0.66598	0.645897	2	9436/23643	NCR2/LY96
GO:0034724	DNA replication-independent nucleosome organization	2/254	53/17913	0.173119	0.66598	0.645897	2	4869/7290	NPM1/HIRA
GO:0140253	cell-cell fusion	2/254	53/17913	0.173119	0.66598	0.645897	2	90342/575	FER1L5/ADGRB1
GO:0071902	positive regulation of protein serine/threonine kinase activity	7/254	322/17913	0.174399	0.66598	0.645897	7	493/5606/5605/5608/2911/57521/3356	ATP2B4/MAP2K3/MAP2K2/MAP2K6/GRM1/RPTOR/HTR2A
GO:0010976	positive regulation of neuron projection development	6/254	265/17913	0.175551	0.66598	0.645897	6	3675/65009/5754/9699/23499/85358	ITGA3/NDRG4/PTK7/RIMS2/MACF1/SHANK3
GO:0097006	regulation of plasma lipoprotein particle levels	3/254	102/17913	0.176421	0.66598	0.645897	3	64788/5326/4018	LMF1/PLAGL2/LPA
GO:0043270	positive regulation of ion transport	6/254	266/17913	0.177634	0.66598	0.645897	6	2048/7225/5608/1785/51083/85358	EPHB2/TRPC6/MAP2K6/DNM2/GAL/SHANK3
GO:0032663	regulation of interleukin-2 production	2/254	54/17913	0.178195	0.66598	0.645897	2	5142/112744	PDE4B/IL17F
GO:0051937	catecholamine transport	2/254	54/17913	0.178195	0.66598	0.645897	2	11188/3356	NISCH/HTR2A
GO:1903078	positive regulation of protein localization to plasma membrane	2/254	54/17913	0.178195	0.66598	0.645897	2	3675/2048	ITGA3/EPHB2
GO:2000272	negative regulation of signaling receptor activity	2/254	54/17913	0.178195	0.66598	0.645897	2	2048/124857	EPHB2/WFIKKN2
GO:0016125	sterol metabolic process	4/254	155/17913	0.178389	0.66598	0.645897	4	64788/51422/29881/2053	LMF1/PRKAG2/NPC1L1/EPHX2
GO:0007411	axon guidance	5/254	210/17913	0.178757	0.66598	0.645897	5	2048/57556/90249/6586/85358	EPHB2/SEMA6A/UNC5A/SLIT3/SHANK3
GO:0046777	protein autophosphorylation	5/254	210/17913	0.178757	0.66598	0.645897	5	3055/22853/5605/4593/65975	HCK/LMTK2/MAP2K2/MUSK/STK33
GO:0032526	response to retinoic acid	3/254	103/17913	0.179946	0.66598	0.645897	3	654/5754/8648	BMP6/PTK7/NCOA1
GO:0006241	CTP biosynthetic process	1/254	14/17913	0.181277	0.66598	0.645897	1	4833	NME4
GO:0006525	arginine metabolic process	1/254	14/17913	0.181277	0.66598	0.645897	1	493	ATP2B4
GO:0006825	copper ion transport	1/254	14/17913	0.181277	0.66598	0.645897	1	341208	HEPHL1
GO:0007501	mesodermal cell fate specification	1/254	14/17913	0.181277	0.66598	0.645897	1	2139	EYA2
GO:0009209	pyrimidine ribonucleoside triphosphate biosynthetic process	1/254	14/17913	0.181277	0.66598	0.645897	1	4833	NME4
GO:0009214	cyclic nucleotide catabolic process	1/254	14/17913	0.181277	0.66598	0.645897	1	5142	PDE4B
GO:0014841	skeletal muscle satellite cell proliferation	1/254	14/17913	0.181277	0.66598	0.645897	1	79647	AKIRIN1
GO:0014854	response to inactivity	1/254	14/17913	0.181277	0.66598	0.645897	1	7402	UTRN
GO:0014857	regulation of skeletal muscle cell proliferation	1/254	14/17913	0.181277	0.66598	0.645897	1	79647	AKIRIN1
GO:0032310	prostaglandin secretion	1/254	14/17913	0.181277	0.66598	0.645897	1	5608	MAP2K6
GO:0035810	positive regulation of urine volume	1/254	14/17913	0.181277	0.66598	0.645897	1	51763	INPP5K
GO:0042249	establishment of planar polarity of embryonic epithelium	1/254	14/17913	0.181277	0.66598	0.645897	1	5754	PTK7
GO:0043558	regulation of translational initiation in response to stress	1/254	14/17913	0.181277	0.66598	0.645897	1	4869	NPM1
GO:0045198	establishment of epithelial cell apical/basal polarity	1/254	14/17913	0.181277	0.66598	0.645897	1	5754	PTK7
GO:0046036	CTP metabolic process	1/254	14/17913	0.181277	0.66598	0.645897	1	4833	NME4
GO:0046037	GMP metabolic process	1/254	14/17913	0.181277	0.66598	0.645897	1	1740	DLG2
GO:0046606	negative regulation of centrosome cycle	1/254	14/17913	0.181277	0.66598	0.645897	1	4869	NPM1
GO:0048148	behavioral response to cocaine	1/254	14/17913	0.181277	0.66598	0.645897	1	3356	HTR2A
GO:0050713	negative regulation of interleukin-1 beta secretion	1/254	14/17913	0.181277	0.66598	0.645897	1	59082	CARD18
GO:0051016	barbed-end actin filament capping	1/254	14/17913	0.181277	0.66598	0.645897	1	57482	KIAA1211
GO:0051127	positive regulation of actin nucleation	1/254	14/17913	0.181277	0.66598	0.645897	1	9873	FCHSD2
GO:0051770	positive regulation of nitric-oxide synthase biosynthetic process	1/254	14/17913	0.181277	0.66598	0.645897	1	5608	MAP2K6
GO:0060026	convergent extension	1/254	14/17913	0.181277	0.66598	0.645897	1	5754	PTK7
GO:0071801	regulation of podosome assembly	1/254	14/17913	0.181277	0.66598	0.645897	1	3055	HCK
GO:0086069	bundle of His cell to Purkinje myocyte communication	1/254	14/17913	0.181277	0.66598	0.645897	1	29119	CTNNA3
GO:0099632	protein transport within plasma membrane	1/254	14/17913	0.181277	0.66598	0.645897	1	10815	CPLX1
GO:0099637	neurotransmitter receptor transport	1/254	14/17913	0.181277	0.66598	0.645897	1	10815	CPLX1
GO:0106070	regulation of adenylate cyclase-activating G protein-coupled receptor signaling pathway	1/254	14/17913	0.181277	0.66598	0.645897	1	493	ATP2B4
GO:1900121	negative regulation of receptor binding	1/254	14/17913	0.181277	0.66598	0.645897	1	5792	PTPRF
GO:1900452	regulation of long-term synaptic depression	1/254	14/17913	0.181277	0.66598	0.645897	1	85358	SHANK3
GO:1900747	negative regulation of vascular endothelial growth factor signaling pathway	1/254	14/17913	0.181277	0.66598	0.645897	1	57556	SEMA6A
GO:1902570	protein localization to nucleolus	1/254	14/17913	0.181277	0.66598	0.645897	1	25885	POLR1A
GO:1903351	cellular response to dopamine	1/254	14/17913	0.181277	0.66598	0.645897	1	1785	DNM2
GO:1903540	establishment of protein localization to postsynaptic membrane	1/254	14/17913	0.181277	0.66598	0.645897	1	10815	CPLX1
GO:1903729	regulation of plasma membrane organization	1/254	14/17913	0.181277	0.66598	0.645897	1	1785	DNM2
GO:1904152	regulation of retrograde protein transport, ER to cytosol	1/254	14/17913	0.181277	0.66598	0.645897	1	337867	UBAC2
GO:1904889	regulation of excitatory synapse assembly	1/254	14/17913	0.181277	0.66598	0.645897	1	387804	VSTM5
GO:2000651	positive regulation of sodium ion transmembrane transporter activity	1/254	14/17913	0.181277	0.66598	0.645897	1	1785	DNM2
GO:0002066	columnar/cuboidal epithelial cell development	2/254	55/17913	0.183293	0.66598	0.645897	2	654/3172	BMP6/HNF4A
GO:0006949	syncytium formation	2/254	55/17913	0.183293	0.66598	0.645897	2	90342/575	FER1L5/ADGRB1
GO:0031102	neuron projection regeneration	2/254	55/17913	0.183293	0.66598	0.645897	2	146760/5792	RTN4RL1/PTPRF
GO:0043486	histone exchange	2/254	55/17913	0.183293	0.66598	0.645897	2	23198/4869	PSME4/NPM1
GO:0048008	platelet-derived growth factor receptor signaling pathway	2/254	55/17913	0.183293	0.66598	0.645897	2	65009/9146	NDRG4/HGS
GO:1902017	regulation of cilium assembly	2/254	55/17913	0.183293	0.66598	0.645897	2	1785/4134	DNM2/MAP4
GO:0097485	neuron projection guidance	5/254	212/17913	0.18354	0.66598	0.645897	5	2048/57556/90249/6586/85358	EPHB2/SEMA6A/UNC5A/SLIT3/SHANK3
GO:0019827	stem cell population maintenance	4/254	158/17913	0.186868	0.66598	0.645897	4	1045/5435/63976/22882	CDX2/POLR2F/PRDM16/ZHX2
GO:0006939	smooth muscle contraction	3/254	105/17913	0.187052	0.66598	0.645897	3	493/2017/3356	ATP2B4/CTTN/HTR2A
GO:0045446	endothelial cell differentiation	3/254	105/17913	0.187052	0.66598	0.645897	3	55810/654/26051	FOXJ2/BMP6/PPP1R16B
GO:0001503	ossification	8/254	388/17913	0.187334	0.66598	0.645897	8	4041/2662/654/148979/133522/7290/55151/433	LRP5/GDF10/BMP6/GLIS1/PPARGC1B/HIRA/TMEM38B/ASGR2
GO:0003012	muscle system process	9/254	448/17913	0.187418	0.66598	0.645897	9	493/5606/5608/2017/55151/29119/5142/7402/3356	ATP2B4/MAP2K3/MAP2K6/CTTN/TMEM38B/CTNNA3/PDE4B/UTRN/HTR2A
GO:0050768	negative regulation of neurogenesis	6/254	271/17913	0.1882	0.66598	0.645897	6	57534/2048/146760/7225/26052/22882	MIB1/EPHB2/RTN4RL1/TRPC6/DNM3/ZHX2
GO:0070372	regulation of ERK1 and ERK2 cascade	6/254	271/17913	0.1882	0.66598	0.645897	6	65009/2048/6504/57556/2651/3356	NDRG4/EPHB2/SLAMF1/SEMA6A/GCNT2/HTR2A
GO:0006826	iron ion transport	2/254	56/17913	0.188412	0.66598	0.645897	2	22853/1785	LMTK2/DNM2
GO:0007266	Rho protein signal transduction	4/254	159/17913	0.189723	0.66598	0.645897	4	3675/7409/54922/5924	ITGA3/VAV1/RASIP1/RASGRF2
GO:0030522	intracellular receptor signaling pathway	6/254	272/17913	0.190342	0.66598	0.645897	6	55914/133522/5547/5608/2516/8648	ERBIN/PPARGC1B/PRCP/MAP2K6/NR5A1/NCOA1
GO:0006721	terpenoid metabolic process	3/254	106/17913	0.190633	0.66598	0.645897	3	375790/151056/9672	AGRN/PLB1/SDC3
GO:0021761	limbic system development	3/254	106/17913	0.190633	0.66598	0.645897	3	493/8648/23440	ATP2B4/NCOA1/OTP
GO:0043279	response to alkaloid	3/254	106/17913	0.190633	0.66598	0.645897	3	55151/1785/3356	TMEM38B/DNM2/HTR2A
GO:0007584	response to nutrient	5/254	215/17913	0.190803	0.66598	0.645897	5	3141/64241/7299/8648/64240	HLCS/ABCG8/TYR/NCOA1/ABCG5
GO:0098727	maintenance of cell number	4/254	160/17913	0.192592	0.66598	0.645897	4	1045/5435/63976/22882	CDX2/POLR2F/PRDM16/ZHX2
GO:0001829	trophectodermal cell differentiation	1/254	15/17913	0.192895	0.66598	0.645897	1	1045	CDX2
GO:0002031	G protein-coupled receptor internalization	1/254	15/17913	0.192895	0.66598	0.645897	1	1785	DNM2
GO:0007158	neuron cell-cell adhesion	1/254	15/17913	0.192895	0.66598	0.645897	1	9379	NRXN2
GO:0009208	pyrimidine ribonucleoside triphosphate metabolic process	1/254	15/17913	0.192895	0.66598	0.645897	1	4833	NME4
GO:0009415	response to water	1/254	15/17913	0.192895	0.66598	0.645897	1	493	ATP2B4
GO:0010566	regulation of ketone biosynthetic process	1/254	15/17913	0.192895	0.66598	0.645897	1	654	BMP6
GO:0010759	positive regulation of macrophage chemotaxis	1/254	15/17913	0.192895	0.66598	0.645897	1	79647	AKIRIN1
GO:0014856	skeletal muscle cell proliferation	1/254	15/17913	0.192895	0.66598	0.645897	1	79647	AKIRIN1
GO:0014874	response to stimulus involved in regulation of muscle adaptation	1/254	15/17913	0.192895	0.66598	0.645897	1	7402	UTRN
GO:0015732	prostaglandin transport	1/254	15/17913	0.192895	0.66598	0.645897	1	5608	MAP2K6
GO:0017014	protein nitrosylation	1/254	15/17913	0.192895	0.66598	0.645897	1	493	ATP2B4
GO:0018119	peptidyl-cysteine S-nitrosylation	1/254	15/17913	0.192895	0.66598	0.645897	1	493	ATP2B4
GO:0030238	male sex determination	1/254	15/17913	0.192895	0.66598	0.645897	1	2516	NR5A1
GO:0031268	pseudopodium organization	1/254	15/17913	0.192895	0.66598	0.645897	1	57111	RAB25
GO:0032352	positive regulation of hormone metabolic process	1/254	15/17913	0.192895	0.66598	0.645897	1	654	BMP6
GO:0032645	regulation of granulocyte macrophage colony-stimulating factor production	1/254	15/17913	0.192895	0.66598	0.645897	1	112744	IL17F
GO:0035864	response to potassium ion	1/254	15/17913	0.192895	0.66598	0.645897	1	1740	DLG2
GO:0042535	positive regulation of tumor necrosis factor biosynthetic process	1/254	15/17913	0.192895	0.66598	0.645897	1	943	TNFRSF8
GO:0045091	regulation of single stranded viral RNA replication via double stranded DNA intermediate	1/254	15/17913	0.192895	0.66598	0.645897	1	51763	INPP5K
GO:0045414	regulation of interleukin-8 biosynthetic process	1/254	15/17913	0.192895	0.66598	0.645897	1	112744	IL17F
GO:0046184	aldehyde biosynthetic process	1/254	15/17913	0.192895	0.66598	0.645897	1	654	BMP6
GO:0050651	dermatan sulfate proteoglycan biosynthetic process	1/254	15/17913	0.192895	0.66598	0.645897	1	10090	UST
GO:0050961	detection of temperature stimulus involved in sensory perception	1/254	15/17913	0.192895	0.66598	0.645897	1	3356	HTR2A
GO:0050965	detection of temperature stimulus involved in sensory perception of pain	1/254	15/17913	0.192895	0.66598	0.645897	1	3356	HTR2A
GO:0051044	positive regulation of membrane protein ectodomain proteolysis	1/254	15/17913	0.192895	0.66598	0.645897	1	4898	NRDC
GO:0051923	sulfation	1/254	15/17913	0.192895	0.66598	0.645897	1	10090	UST
GO:0060134	prepulse inhibition	1/254	15/17913	0.192895	0.66598	0.645897	1	1496	CTNNA2
GO:0061158	3'-UTR-mediated mRNA destabilization	1/254	15/17913	0.192895	0.66598	0.645897	1	131405	TRIM71
GO:0070262	peptidyl-serine dephosphorylation	1/254	15/17913	0.192895	0.66598	0.645897	1	26051	PPP1R16B
GO:0070571	negative regulation of neuron projection regeneration	1/254	15/17913	0.192895	0.66598	0.645897	1	146760	RTN4RL1
GO:0090136	epithelial cell-cell adhesion	1/254	15/17913	0.192895	0.66598	0.645897	1	3801	KIFC3
GO:0098840	protein transport along microtubule	1/254	15/17913	0.192895	0.66598	0.645897	1	1740	DLG2
GO:0099118	microtubule-based protein transport	1/254	15/17913	0.192895	0.66598	0.645897	1	1740	DLG2
GO:1901741	positive regulation of myoblast fusion	1/254	15/17913	0.192895	0.66598	0.645897	1	575	ADGRB1
GO:1901841	regulation of high voltage-gated calcium channel activity	1/254	15/17913	0.192895	0.66598	0.645897	1	5142	PDE4B
GO:1902001	fatty acid transmembrane transport	1/254	15/17913	0.192895	0.66598	0.645897	1	51422	PRKAG2
GO:1902548	negative regulation of cellular response to vascular endothelial growth factor stimulus	1/254	15/17913	0.192895	0.66598	0.645897	1	57556	SEMA6A
GO:1903350	response to dopamine	1/254	15/17913	0.192895	0.66598	0.645897	1	1785	DNM2
GO:1903543	positive regulation of exosomal secretion	1/254	15/17913	0.192895	0.66598	0.645897	1	9146	HGS
GO:1905276	regulation of epithelial tube formation	1/254	15/17913	0.192895	0.66598	0.645897	1	5754	PTK7
GO:2000369	regulation of clathrin-dependent endocytosis	1/254	15/17913	0.192895	0.66598	0.645897	1	1785	DNM2
GO:2000484	positive regulation of interleukin-8 secretion	1/254	15/17913	0.192895	0.66598	0.645897	1	2219	FCN1
GO:0010518	positive regulation of phospholipase activity	2/254	57/17913	0.193551	0.66598	0.645897	2	115727/3356	RASGRP4/HTR2A
GO:0032507	maintenance of protein location in cell	2/254	57/17913	0.193551	0.66598	0.645897	2	580/2516	BARD1/NR5A1
GO:0032515	negative regulation of phosphoprotein phosphatase activity	2/254	57/17913	0.193551	0.66598	0.645897	2	22853/10842	LMTK2/PPP1R17
GO:0033047	regulation of mitotic sister chromatid segregation	2/254	57/17913	0.193551	0.66598	0.645897	2	10459/57520	MAD2L2/HECW2
GO:1903428	positive regulation of reactive oxygen species biosynthetic process	2/254	57/17913	0.193551	0.66598	0.645897	2	575/1785	ADGRB1/DNM2
GO:0001938	positive regulation of endothelial cell proliferation	3/254	107/17913	0.194231	0.66598	0.645897	3	654/26051/57521	BMP6/PPP1R16B/RPTOR
GO:0060071	Wnt signaling pathway, planar cell polarity pathway	3/254	107/17913	0.194231	0.66598	0.645897	3	23198/5754/5682	PSME4/PTK7/PSMA1
GO:0071706	tumor necrosis factor superfamily cytokine production	4/254	161/17913	0.195474	0.66598	0.645897	4	6504/943/23643/112744	SLAMF1/TNFRSF8/LY96/IL17F
GO:0043393	regulation of protein binding	5/254	217/17913	0.195701	0.66598	0.645897	5	7049/59082/5792/5195/124857	TGFBR3/CARD18/PTPRF/PEX14/WFIKKN2
GO:0060047	heart contraction	6/254	275/17913	0.196825	0.66598	0.645897	6	493/5606/5608/55151/29119/5142	ATP2B4/MAP2K3/MAP2K6/TMEM38B/CTNNA3/PDE4B
GO:0030282	bone mineralization	3/254	108/17913	0.197846	0.66598	0.645897	3	654/55151/433	BMP6/TMEM38B/ASGR2
GO:0010324	membrane invagination	2/254	58/17913	0.198708	0.66598	0.645897	2	9146/575	HGS/ADGRB1
GO:0051057	positive regulation of small GTPase mediated signal transduction	2/254	58/17913	0.198708	0.66598	0.645897	2	7409/115727	VAV1/RASGRP4
GO:1902110	positive regulation of mitochondrial membrane permeability involved in apoptotic process	2/254	58/17913	0.198708	0.66598	0.645897	2	1869/2139	E2F1/EYA2
GO:0042326	negative regulation of phosphorylation	9/254	455/17913	0.199035	0.66598	0.645897	9	2048/4041/51763/51422/54922/57556/4869/753/57521	EPHB2/LRP5/INPP5K/PRKAG2/RASIP1/SEMA6A/NPM1/LDLRAD4/RPTOR
GO:0048593	camera-type eye morphogenesis	3/254	109/17913	0.201477	0.66598	0.645897	3	2048/4041/22882	EPHB2/LRP5/ZHX2
GO:0090175	regulation of establishment of planar polarity	3/254	109/17913	0.201477	0.66598	0.645897	3	23198/5754/5682	PSME4/PTK7/PSMA1
GO:0019882	antigen processing and presentation	5/254	220/17913	0.203129	0.66598	0.645897	5	23198/115827/1785/5682/4012	PSME4/RAB3C/DNM2/PSMA1/LNPEP
GO:0001947	heart looping	2/254	59/17913	0.203881	0.66598	0.645897	2	65009/57534	NDRG4/MIB1
GO:0006220	pyrimidine nucleotide metabolic process	2/254	59/17913	0.203881	0.66598	0.645897	2	4833/5169	NME4/ENPP3
GO:0006937	regulation of muscle contraction	4/254	164/17913	0.204201	0.66598	0.645897	4	2017/55151/29119/5142	CTTN/TMEM38B/CTNNA3/PDE4B
GO:0001780	neutrophil homeostasis	1/254	16/17913	0.204349	0.66598	0.645897	1	5142	PDE4B
GO:0001977	renal system process involved in regulation of blood volume	1/254	16/17913	0.204349	0.66598	0.645897	1	10391	CORO2B
GO:0008090	retrograde axonal transport	1/254	16/17913	0.204349	0.66598	0.645897	1	1740	DLG2
GO:0010875	positive regulation of cholesterol efflux	1/254	16/17913	0.204349	0.66598	0.645897	1	26154	ABCA12
GO:0015919	peroxisomal membrane transport	1/254	16/17913	0.204349	0.66598	0.645897	1	5195	PEX14
GO:0032225	regulation of synaptic transmission, dopaminergic	1/254	16/17913	0.204349	0.66598	0.645897	1	25953	PNKD
GO:0032305	positive regulation of icosanoid secretion	1/254	16/17913	0.204349	0.66598	0.645897	1	5608	MAP2K6
GO:0032354	response to follicle-stimulating hormone	1/254	16/17913	0.204349	0.66598	0.645897	1	7049	TGFBR3
GO:0032604	granulocyte macrophage colony-stimulating factor production	1/254	16/17913	0.204349	0.66598	0.645897	1	112744	IL17F
GO:0032695	negative regulation of interleukin-12 production	1/254	16/17913	0.204349	0.66598	0.645897	1	6504	SLAMF1
GO:0033631	cell-cell adhesion mediated by integrin	1/254	16/17913	0.204349	0.66598	0.645897	1	8631	SKAP1
GO:0039692	single stranded viral RNA replication via double stranded DNA intermediate	1/254	16/17913	0.204349	0.66598	0.645897	1	51763	INPP5K
GO:0042228	interleukin-8 biosynthetic process	1/254	16/17913	0.204349	0.66598	0.645897	1	112744	IL17F
GO:0043981	histone H4-K5 acetylation	1/254	16/17913	0.204349	0.66598	0.645897	1	3054	HCFC1
GO:0043982	histone H4-K8 acetylation	1/254	16/17913	0.204349	0.66598	0.645897	1	3054	HCFC1
GO:0044849	estrous cycle	1/254	16/17913	0.204349	0.66598	0.645897	1	8648	NCOA1
GO:0045780	positive regulation of bone resorption	1/254	16/17913	0.204349	0.66598	0.645897	1	133522	PPARGC1B
GO:0046174	polyol catabolic process	1/254	16/17913	0.204349	0.66598	0.645897	1	51763	INPP5K
GO:0046852	positive regulation of bone remodeling	1/254	16/17913	0.204349	0.66598	0.645897	1	133522	PPARGC1B
GO:0048243	norepinephrine secretion	1/254	16/17913	0.204349	0.66598	0.645897	1	11188	NISCH
GO:0048820	hair follicle maturation	1/254	16/17913	0.204349	0.66598	0.645897	1	51083	GAL
GO:0050655	dermatan sulfate proteoglycan metabolic process	1/254	16/17913	0.204349	0.66598	0.645897	1	10090	UST
GO:0050884	neuromuscular process controlling posture	1/254	16/17913	0.204349	0.66598	0.645897	1	25953	PNKD
GO:0051444	negative regulation of ubiquitin-protein transferase activity	1/254	16/17913	0.204349	0.66598	0.645897	1	10459	MAD2L2
GO:0051482	positive regulation of cytosolic calcium ion concentration involved in phospholipase C-activating G protein-coupled signaling pathway	1/254	16/17913	0.204349	0.66598	0.645897	1	2911	GRM1
GO:0055119	relaxation of cardiac muscle	1/254	16/17913	0.204349	0.66598	0.645897	1	5142	PDE4B
GO:0060046	regulation of acrosome reaction	1/254	16/17913	0.204349	0.66598	0.645897	1	151056	PLB1
GO:0070886	positive regulation of calcineurin-NFAT signaling cascade	1/254	16/17913	0.204349	0.66598	0.645897	1	23261	CAMTA1
GO:0071605	monocyte chemotactic protein-1 production	1/254	16/17913	0.204349	0.66598	0.645897	1	55914	ERBIN
GO:0071637	regulation of monocyte chemotactic protein-1 production	1/254	16/17913	0.204349	0.66598	0.645897	1	55914	ERBIN
GO:0071732	cellular response to nitric oxide	1/254	16/17913	0.204349	0.66598	0.645897	1	1785	DNM2
GO:0071786	endoplasmic reticulum tubular network organization	1/254	16/17913	0.204349	0.66598	0.645897	1	65055	REEP1
GO:0071880	adenylate cyclase-activating adrenergic receptor signaling pathway	1/254	16/17913	0.204349	0.66598	0.645897	1	493	ATP2B4
GO:0086103	G protein-coupled receptor signaling pathway involved in heart process	1/254	16/17913	0.204349	0.66598	0.645897	1	493	ATP2B4
GO:0090335	regulation of brown fat cell differentiation	1/254	16/17913	0.204349	0.66598	0.645897	1	63976	PRDM16
GO:0097091	synaptic vesicle clustering	1/254	16/17913	0.204349	0.66598	0.645897	1	79953	SYNDIG1
GO:0099010	modification of postsynaptic structure	1/254	16/17913	0.204349	0.66598	0.645897	1	1496	CTNNA2
GO:0099170	postsynaptic modulation of chemical synaptic transmission	1/254	16/17913	0.204349	0.66598	0.645897	1	9101	USP8
GO:0106058	positive regulation of calcineurin-mediated signaling	1/254	16/17913	0.204349	0.66598	0.645897	1	23261	CAMTA1
GO:1903541	regulation of exosomal secretion	1/254	16/17913	0.204349	0.66598	0.645897	1	9146	HGS
GO:2000251	positive regulation of actin cytoskeleton reorganization	1/254	16/17913	0.204349	0.66598	0.645897	1	3055	HCK
GO:2000479	regulation of cAMP-dependent protein kinase activity	1/254	16/17913	0.204349	0.66598	0.645897	1	493	ATP2B4
GO:0035725	sodium ion transmembrane transport	3/254	110/17913	0.205124	0.66598	0.645897	3	493/1785/7402	ATP2B4/DNM2/UTRN
GO:0042035	regulation of cytokine biosynthetic process	3/254	110/17913	0.205124	0.66598	0.645897	3	5606/943/112744	MAP2K3/TNFRSF8/IL17F
GO:0002429	immune response-activating cell surface receptor signaling pathway	8/254	399/17913	0.207163	0.66598	0.645897	8	2219/3055/7409/5079/23198/8631/5682/5142	FCN1/HCK/VAV1/PAX5/PSME4/SKAP1/PSMA1/PDE4B
GO:0006066	alcohol metabolic process	7/254	339/17913	0.20733	0.66598	0.645897	7	64788/51763/654/29881/151056/84532/2053	LMF1/INPP5K/BMP6/NPC1L1/PLB1/ACSS1/EPHX2
GO:0001649	osteoblast differentiation	5/254	222/17913	0.208134	0.66598	0.645897	5	4041/2662/654/148979/7290	LRP5/GDF10/BMP6/GLIS1/HIRA
GO:0032386	regulation of intracellular transport	8/254	400/17913	0.209007	0.66598	0.645897	8	65009/51763/580/5605/65055/10815/337867/3356	NDRG4/INPP5K/BARD1/MAP2K2/REEP1/CPLX1/UBAC2/HTR2A
GO:0009247	glycolipid biosynthetic process	2/254	60/17913	0.209069	0.66598	0.645897	2	8869/29906	ST3GAL5/ST8SIA5
GO:0030593	neutrophil chemotaxis	2/254	60/17913	0.209069	0.66598	0.645897	2	7409/5142	VAV1/PDE4B
GO:1902686	mitochondrial outer membrane permeabilization involved in programmed cell death	2/254	60/17913	0.209069	0.66598	0.645897	2	1869/2139	E2F1/EYA2
GO:1905953	negative regulation of lipid localization	2/254	60/17913	0.209069	0.66598	0.645897	2	64241/64240	ABCG8/ABCG5
GO:0019935	cyclic-nucleotide-mediated signaling	4/254	166/17913	0.210082	0.66598	0.645897	4	493/9699/51083/4724	ATP2B4/RIMS2/GAL/NDUFS4
GO:0021543	pallium development	4/254	166/17913	0.210082	0.66598	0.645897	4	493/5079/83696/8648	ATP2B4/PAX5/TRAPPC9/NCOA1
GO:0021987	cerebral cortex development	3/254	112/17913	0.212463	0.66598	0.645897	3	5079/83696/8648	PAX5/TRAPPC9/NCOA1
GO:0007018	microtubule-based movement	5/254	224/17913	0.213178	0.66598	0.645897	5	1740/23059/201625/4134/5195	DLG2/CLUAP1/DNAH12/MAP4/PEX14
GO:0050851	antigen receptor-mediated signaling pathway	5/254	224/17913	0.213178	0.66598	0.645897	5	5079/23198/8631/5682/5142	PAX5/PSME4/SKAP1/PSMA1/PDE4B
GO:0002753	cytoplasmic pattern recognition receptor signaling pathway	2/254	61/17913	0.21427	0.66598	0.645897	2	55914/5608	ERBIN/MAP2K6
GO:0003407	neural retina development	2/254	61/17913	0.21427	0.66598	0.645897	2	493/22882	ATP2B4/ZHX2
GO:0006027	glycosaminoglycan catabolic process	2/254	61/17913	0.21427	0.66598	0.645897	2	375790/9672	AGRN/SDC3
GO:0030032	lamellipodium assembly	2/254	61/17913	0.21427	0.66598	0.645897	2	1785/79647	DNM2/AKIRIN1
GO:0031646	positive regulation of neurological system process	2/254	61/17913	0.21427	0.66598	0.645897	2	9699/85358	RIMS2/SHANK3
GO:1904377	positive regulation of protein localization to cell periphery	2/254	61/17913	0.21427	0.66598	0.645897	2	3675/2048	ITGA3/EPHB2
GO:2000243	positive regulation of reproductive process	2/254	61/17913	0.21427	0.66598	0.645897	2	151056/2516	PLB1/NR5A1
GO:1901987	regulation of cell cycle phase transition	9/254	464/17913	0.214404	0.66598	0.645897	9	493/10459/1869/5890/23198/4869/57520/57521/5682	ATP2B4/MAD2L2/E2F1/RAD51B/PSME4/NPM1/HECW2/RPTOR/PSMA1
GO:0090068	positive regulation of cell cycle process	6/254	283/17913	0.214505	0.66598	0.645897	6	7709/4041/1869/5890/4869/57521	ZBTB17/LRP5/E2F1/RAD51B/NPM1/RPTOR
GO:0001573	ganglioside metabolic process	1/254	17/17913	0.215641	0.66598	0.645897	1	8869	ST3GAL5
GO:0007213	G protein-coupled acetylcholine receptor signaling pathway	1/254	17/17913	0.215641	0.66598	0.645897	1	375790	AGRN
GO:0009148	pyrimidine nucleoside triphosphate biosynthetic process	1/254	17/17913	0.215641	0.66598	0.645897	1	4833	NME4
GO:0018904	ether metabolic process	1/254	17/17913	0.215641	0.66598	0.645897	1	2053	EPHX2
GO:0030277	maintenance of gastrointestinal epithelium	1/254	17/17913	0.215641	0.66598	0.645897	1	57482	KIAA1211
GO:0031000	response to caffeine	1/254	17/17913	0.215641	0.66598	0.645897	1	55151	TMEM38B
GO:0036270	response to diuretic	1/254	17/17913	0.215641	0.66598	0.645897	1	55151	TMEM38B
GO:0050711	negative regulation of interleukin-1 secretion	1/254	17/17913	0.215641	0.66598	0.645897	1	59082	CARD18
GO:0060080	inhibitory postsynaptic potential	1/254	17/17913	0.215641	0.66598	0.645897	1	9699	RIMS2
GO:0061298	retina vasculature development in camera-type eye	1/254	17/17913	0.215641	0.66598	0.645897	1	4041	LRP5
GO:0070885	negative regulation of calcineurin-NFAT signaling cascade	1/254	17/17913	0.215641	0.66598	0.645897	1	493	ATP2B4
GO:0097320	plasma membrane tubulation	1/254	17/17913	0.215641	0.66598	0.645897	1	1785	DNM2
GO:0106057	negative regulation of calcineurin-mediated signaling	1/254	17/17913	0.215641	0.66598	0.645897	1	493	ATP2B4
GO:2000042	negative regulation of double-strand break repair via homologous recombination	1/254	17/17913	0.215641	0.66598	0.645897	1	10459	MAD2L2
GO:2000641	regulation of early endosome to late endosome transport	1/254	17/17913	0.215641	0.66598	0.645897	1	5605	MAP2K2
GO:0043666	regulation of phosphoprotein phosphatase activity	3/254	113/17913	0.216154	0.66598	0.645897	3	22853/26051/10842	LMTK2/PPP1R16B/PPP1R17
GO:0060964	regulation of gene silencing by miRNA	3/254	113/17913	0.216154	0.66598	0.645897	3	131405/5605/5435	TRIM71/MAP2K2/POLR2F
GO:1903825	organic acid transmembrane transport	3/254	113/17913	0.216154	0.66598	0.645897	3	153201/51422/9123	SLC36A2/PRKAG2/SLC16A3
GO:1905039	carboxylic acid transmembrane transport	3/254	113/17913	0.216154	0.66598	0.645897	3	153201/51422/9123	SLC36A2/PRKAG2/SLC16A3
GO:0003015	heart process	6/254	284/17913	0.216753	0.66598	0.645897	6	493/5606/5608/55151/29119/5142	ATP2B4/MAP2K3/MAP2K6/TMEM38B/CTNNA3/PDE4B
GO:0016049	cell growth	9/254	466/17913	0.217882	0.66598	0.645897	9	10459/2017/9699/1785/23499/51083/57521/3172/6586	MAD2L2/CTTN/RIMS2/DNM2/MACF1/GAL/RPTOR/HNF4A/SLIT3
GO:0008217	regulation of blood pressure	4/254	169/17913	0.218992	0.66598	0.645897	4	4041/11188/10391/2053	LRP5/NISCH/CORO2B/EPHX2
GO:0009166	nucleotide catabolic process	4/254	169/17913	0.218992	0.66598	0.645897	4	51422/22978/5142/3356	PRKAG2/NT5C2/PDE4B/HTR2A
GO:0030324	lung development	4/254	169/17913	0.218992	0.66598	0.645897	4	3675/26154/5754/55151	ITGA3/ABCA12/PTK7/TMEM38B
GO:0048167	regulation of synaptic plasticity	4/254	169/17913	0.218992	0.66598	0.645897	4	2048/22941/575/85358	EPHB2/SHANK2/ADGRB1/SHANK3
GO:0001756	somitogenesis	2/254	62/17913	0.219484	0.66598	0.645897	2	57534/1045	MIB1/CDX2
GO:0006360	transcription by RNA polymerase I	2/254	62/17913	0.219484	0.66598	0.645897	2	5435/25885	POLR2F/POLR1A
GO:0032623	interleukin-2 production	2/254	62/17913	0.219484	0.66598	0.645897	2	5142/112744	PDE4B/IL17F
GO:0035249	synaptic transmission, glutamatergic	2/254	62/17913	0.219484	0.66598	0.645897	2	85358/3356	SHANK3/HTR2A
GO:0035794	positive regulation of mitochondrial membrane permeability	2/254	62/17913	0.219484	0.66598	0.645897	2	1869/2139	E2F1/EYA2
GO:1901016	regulation of potassium ion transmembrane transporter activity	2/254	62/17913	0.219484	0.66598	0.645897	2	1785/51083	DNM2/GAL
GO:0050900	leukocyte migration	9/254	467/17913	0.21963	0.66598	0.645897	9	3675/3055/7409/7056/84818/5142/9123/9672/79647	ITGA3/HCK/VAV1/THBD/IL17RC/PDE4B/SLC16A3/SDC3/AKIRIN1
GO:0006661	phosphatidylinositol biosynthetic process	3/254	114/17913	0.219858	0.66598	0.645897	3	5297/51763/3356	PI4KA/INPP5K/HTR2A
GO:0003205	cardiac chamber development	4/254	170/17913	0.221984	0.66598	0.645897	4	7049/5754/1785/6586	TGFBR3/PTK7/DNM2/SLIT3
GO:0097529	myeloid leukocyte migration	4/254	170/17913	0.221984	0.66598	0.645897	4	7409/84818/5142/79647	VAV1/IL17RC/PDE4B/AKIRIN1
GO:0048511	rhythmic process	6/254	287/17913	0.223546	0.66598	0.645897	6	3062/5608/2516/8648/3172/6586	HCRTR2/MAP2K6/NR5A1/NCOA1/HNF4A/SLIT3
GO:0042471	ear morphogenesis	3/254	115/17913	0.223575	0.66598	0.645897	3	2048/10083/5754	EPHB2/USH1C/PTK7
GO:0006026	aminoglycan catabolic process	2/254	63/17913	0.224708	0.66598	0.645897	2	375790/9672	AGRN/SDC3
GO:0006487	protein N-linked glycosylation	2/254	63/17913	0.224708	0.66598	0.645897	2	57134/433	MAN1C1/ASGR2
GO:0021872	forebrain generation of neurons	2/254	63/17913	0.224708	0.66598	0.645897	2	85358/23440	SHANK3/OTP
GO:0035914	skeletal muscle cell differentiation	2/254	63/17913	0.224708	0.66598	0.645897	2	5079/79647	PAX5/AKIRIN1
GO:0043967	histone H4 acetylation	2/254	63/17913	0.224708	0.66598	0.645897	2	3054/8648	HCFC1/NCOA1
GO:0090181	regulation of cholesterol metabolic process	2/254	63/17913	0.224708	0.66598	0.645897	2	64788/2053	LMF1/EPHX2
GO:0000209	protein polyubiquitination	6/254	288/17913	0.225825	0.66598	0.645897	6	80176/580/23198/285671/5682/4012	SPSB1/BARD1/PSME4/RNF180/PSMA1/LNPEP
GO:0007597	blood coagulation, intrinsic pathway	1/254	18/17913	0.226774	0.66598	0.645897	1	5547	PRCP
GO:0032460	negative regulation of protein oligomerization	1/254	18/17913	0.226774	0.66598	0.645897	1	5195	PEX14
GO:0035089	establishment of apical/basal cell polarity	1/254	18/17913	0.226774	0.66598	0.645897	1	5754	PTK7
GO:0042276	error-prone translesion synthesis	1/254	18/17913	0.226774	0.66598	0.645897	1	10459	MAD2L2
GO:0042772	DNA damage response, signal transduction resulting in transcription	1/254	18/17913	0.226774	0.66598	0.645897	1	10459	MAD2L2
GO:0043555	regulation of translation in response to stress	1/254	18/17913	0.226774	0.66598	0.645897	1	4869	NPM1
GO:0060977	coronary vasculature morphogenesis	1/254	18/17913	0.226774	0.66598	0.645897	1	7049	TGFBR3
GO:0071800	podosome assembly	1/254	18/17913	0.226774	0.66598	0.645897	1	3055	HCK
GO:0098581	detection of external biotic stimulus	1/254	18/17913	0.226774	0.66598	0.645897	1	23643	LY96
GO:1901739	regulation of myoblast fusion	1/254	18/17913	0.226774	0.66598	0.645897	1	575	ADGRB1
GO:2000193	positive regulation of fatty acid transport	1/254	18/17913	0.226774	0.66598	0.645897	1	5608	MAP2K6
GO:2000311	regulation of AMPA receptor activity	1/254	18/17913	0.226774	0.66598	0.645897	1	85358	SHANK3
GO:0002220	innate immune response activating cell surface receptor signaling pathway	3/254	116/17913	0.227305	0.66598	0.645897	3	2219/23198/5682	FCN1/PSME4/PSMA1
GO:0051493	regulation of cytoskeleton organization	9/254	472/17913	0.228449	0.66598	0.645897	9	3055/51763/1496/10391/4869/2017/9873/85358/57482	HCK/INPP5K/CTNNA2/CORO2B/NPM1/CTTN/FCHSD2/SHANK3/KIAA1211
GO:0007588	excretion	2/254	64/17913	0.229942	0.66598	0.645897	2	64241/64240	ABCG8/ABCG5
GO:0015909	long-chain fatty acid transport	2/254	64/17913	0.229942	0.66598	0.645897	2	51422/28965	PRKAG2/SLC27A6
GO:0015914	phospholipid transport	2/254	64/17913	0.229942	0.66598	0.645897	2	26154/64241	ABCA12/ABCG8
GO:0032768	regulation of monooxygenase activity	2/254	64/17913	0.229942	0.66598	0.645897	2	493/1785	ATP2B4/DNM2
GO:0046128	purine ribonucleoside metabolic process	2/254	64/17913	0.229942	0.66598	0.645897	2	4833/1740	NME4/DLG2
GO:0046782	regulation of viral transcription	2/254	64/17913	0.229942	0.66598	0.645897	2	51763/5435	INPP5K/POLR2F
GO:0061371	determination of heart left/right asymmetry	2/254	64/17913	0.229942	0.66598	0.645897	2	65009/57534	NDRG4/MIB1
GO:1902108	regulation of mitochondrial membrane permeability involved in apoptotic process	2/254	64/17913	0.229942	0.66598	0.645897	2	1869/2139	E2F1/EYA2
GO:1905710	positive regulation of membrane permeability	2/254	64/17913	0.229942	0.66598	0.645897	2	1869/2139	E2F1/EYA2
GO:0051961	negative regulation of nervous system development	6/254	290/17913	0.230408	0.66598	0.645897	6	57534/2048/146760/7225/26052/22882	MIB1/EPHB2/RTN4RL1/TRPC6/DNM3/ZHX2
GO:0030323	respiratory tube development	4/254	173/17913	0.231026	0.66598	0.645897	4	3675/26154/5754/55151	ITGA3/ABCA12/PTK7/TMEM38B
GO:0001952	regulation of cell-matrix adhesion	3/254	117/17913	0.231046	0.66598	0.645897	3	8631/23499/7402	SKAP1/MACF1/UTRN
GO:0060147	regulation of posttranscriptional gene silencing	3/254	117/17913	0.231046	0.66598	0.645897	3	131405/5605/5435	TRIM71/MAP2K2/POLR2F
GO:0060966	regulation of gene silencing by RNA	3/254	117/17913	0.231046	0.66598	0.645897	3	131405/5605/5435	TRIM71/MAP2K2/POLR2F
GO:0006352	DNA-templated transcription, initiation	5/254	231/17913	0.231133	0.66598	0.645897	5	5435/1871/2516/25885/3172	POLR2F/E2F3/NR5A1/POLR1A/HNF4A
GO:0060249	anatomical structure homeostasis	8/254	413/17913	0.233533	0.66598	0.645897	8	10083/580/26154/133522/2651/94137/55277/57482	USH1C/BARD1/ABCA12/PPARGC1B/GCNT2/RP1L1/FGGY/KIAA1211
GO:0051258	protein polymerization	5/254	232/17913	0.233733	0.66598	0.645897	5	3055/1496/2017/9873/57482	HCK/CTNNA2/CTTN/FCHSD2/KIAA1211
GO:0002478	antigen processing and presentation of exogenous peptide antigen	4/254	174/17913	0.234061	0.66598	0.645897	4	23198/1785/5682/4012	PSME4/DNM2/PSMA1/LNPEP
GO:0003143	embryonic heart tube morphogenesis	2/254	65/17913	0.235183	0.66598	0.645897	2	65009/57534	NDRG4/MIB1
GO:0035924	cellular response to vascular endothelial growth factor stimulus	2/254	65/17913	0.235183	0.66598	0.645897	2	5606/57556	MAP2K3/SEMA6A
GO:0045428	regulation of nitric oxide biosynthetic process	2/254	65/17913	0.235183	0.66598	0.645897	2	493/1785	ATP2B4/DNM2
GO:0006816	calcium ion transport	8/254	415/17913	0.237395	0.66598	0.645897	8	493/51763/7225/773/79054/55151/5142/3356	ATP2B4/INPP5K/TRPC6/CACNA1A/TRPM8/TMEM38B/PDE4B/HTR2A
GO:0001710	mesodermal cell fate commitment	1/254	19/17913	0.237749	0.66598	0.645897	1	2139	EYA2
GO:0002029	desensitization of G protein-coupled receptor signaling pathway	1/254	19/17913	0.237749	0.66598	0.645897	1	1785	DNM2
GO:0006677	glycosylceramide metabolic process	1/254	19/17913	0.237749	0.66598	0.645897	1	7915	ALDH5A1
GO:0006833	water transport	1/254	19/17913	0.237749	0.66598	0.645897	1	51763	INPP5K
GO:0009147	pyrimidine nucleoside triphosphate metabolic process	1/254	19/17913	0.237749	0.66598	0.645897	1	4833	NME4
GO:0010544	negative regulation of platelet activation	1/254	19/17913	0.237749	0.66598	0.645897	1	7056	THBD
GO:0010612	regulation of cardiac muscle adaptation	1/254	19/17913	0.237749	0.66598	0.645897	1	493	ATP2B4
GO:0021756	striatum development	1/254	19/17913	0.237749	0.66598	0.645897	1	85358	SHANK3
GO:0022401	negative adaptation of signaling pathway	1/254	19/17913	0.237749	0.66598	0.645897	1	1785	DNM2
GO:0023019	signal transduction involved in regulation of gene expression	1/254	19/17913	0.237749	0.66598	0.645897	1	3172	HNF4A
GO:0030859	polarized epithelial cell differentiation	1/254	19/17913	0.237749	0.66598	0.645897	1	5754	PTK7
GO:0031061	negative regulation of histone methylation	1/254	19/17913	0.237749	0.66598	0.645897	1	5079	PAX5
GO:0032026	response to magnesium ion	1/254	19/17913	0.237749	0.66598	0.645897	1	654	BMP6
GO:0032069	regulation of nuclease activity	1/254	19/17913	0.237749	0.66598	0.645897	1	4869	NPM1
GO:0032303	regulation of icosanoid secretion	1/254	19/17913	0.237749	0.66598	0.645897	1	5608	MAP2K6
GO:0032332	positive regulation of chondrocyte differentiation	1/254	19/17913	0.237749	0.66598	0.645897	1	654	BMP6
GO:0032495	response to muramyl dipeptide	1/254	19/17913	0.237749	0.66598	0.645897	1	55914	ERBIN
GO:0045076	regulation of interleukin-2 biosynthetic process	1/254	19/17913	0.237749	0.66598	0.645897	1	112744	IL17F
GO:0045663	positive regulation of myoblast differentiation	1/254	19/17913	0.237749	0.66598	0.645897	1	79647	AKIRIN1
GO:0046597	negative regulation of viral entry into host cell	1/254	19/17913	0.237749	0.66598	0.645897	1	2219	FCN1
GO:0046599	regulation of centriole replication	1/254	19/17913	0.237749	0.66598	0.645897	1	4869	NPM1
GO:0051767	nitric-oxide synthase biosynthetic process	1/254	19/17913	0.237749	0.66598	0.645897	1	5608	MAP2K6
GO:0051769	regulation of nitric-oxide synthase biosynthetic process	1/254	19/17913	0.237749	0.66598	0.645897	1	5608	MAP2K6
GO:0060252	positive regulation of glial cell proliferation	1/254	19/17913	0.237749	0.66598	0.645897	1	1869	E2F1
GO:0060973	cell migration involved in heart development	1/254	19/17913	0.237749	0.66598	0.645897	1	65009	NDRG4
GO:0071071	regulation of phospholipid biosynthetic process	1/254	19/17913	0.237749	0.66598	0.645897	1	3356	HTR2A
GO:0071731	response to nitric oxide	1/254	19/17913	0.237749	0.66598	0.645897	1	1785	DNM2
GO:0098911	regulation of ventricular cardiac muscle cell action potential	1/254	19/17913	0.237749	0.66598	0.645897	1	29119	CTNNA3
GO:1901881	positive regulation of protein depolymerization	1/254	19/17913	0.237749	0.66598	0.645897	1	57482	KIAA1211
GO:1902170	cellular response to reactive nitrogen species	1/254	19/17913	0.237749	0.66598	0.645897	1	1785	DNM2
GO:1902307	positive regulation of sodium ion transmembrane transport	1/254	19/17913	0.237749	0.66598	0.645897	1	1785	DNM2
GO:1903242	regulation of cardiac muscle hypertrophy in response to stress	1/254	19/17913	0.237749	0.66598	0.645897	1	493	ATP2B4
GO:1903798	regulation of production of miRNAs involved in gene silencing by miRNA	1/254	19/17913	0.237749	0.66598	0.645897	1	5605	MAP2K2
GO:1905288	vascular associated smooth muscle cell apoptotic process	1/254	19/17913	0.237749	0.66598	0.645897	1	1871	E2F3
GO:1905459	regulation of vascular associated smooth muscle cell apoptotic process	1/254	19/17913	0.237749	0.66598	0.645897	1	1871	E2F3
GO:1905939	regulation of gonad development	1/254	19/17913	0.237749	0.66598	0.645897	1	2516	NR5A1
GO:1990182	exosomal secretion	1/254	19/17913	0.237749	0.66598	0.645897	1	9146	HGS
GO:2000010	positive regulation of protein localization to cell surface	1/254	19/17913	0.237749	0.66598	0.645897	1	26154	ABCA12
GO:2000678	negative regulation of transcription regulatory region DNA binding	1/254	19/17913	0.237749	0.66598	0.645897	1	10459	MAD2L2
GO:0042176	regulation of protein catabolic process	7/254	354/17913	0.238178	0.66598	0.645897	7	4898/9146/10459/580/575/9101/337867	NRDC/HGS/MAD2L2/BARD1/ADGRB1/USP8/UBAC2
GO:0019884	antigen processing and presentation of exogenous antigen	4/254	176/17913	0.240158	0.66598	0.645897	4	23198/1785/5682/4012	PSME4/DNM2/PSMA1/LNPEP
GO:0071222	cellular response to lipopolysaccharide	4/254	176/17913	0.240158	0.66598	0.645897	4	3055/654/5142/23643	HCK/BMP6/PDE4B/LY96
GO:0010517	regulation of phospholipase activity	2/254	66/17913	0.240431	0.66598	0.645897	2	115727/3356	RASGRP4/HTR2A
GO:0015844	monoamine transport	2/254	66/17913	0.240431	0.66598	0.645897	2	11188/3356	NISCH/HTR2A
GO:0001501	skeletal system development	9/254	479/17913	0.241015	0.66598	0.645897	9	4041/2662/5079/654/133522/55151/124857/112744/3203	LRP5/GDF10/PAX5/BMP6/PPARGC1B/TMEM38B/WFIKKN2/IL17F/HOXA6
GO:0032496	response to lipopolysaccharide	6/254	295/17913	0.241991	0.66598	0.645897	6	3055/7056/55914/654/5142/23643	HCK/THBD/ERBIN/BMP6/PDE4B/LY96
GO:0001838	embryonic epithelial tube formation	3/254	120/17913	0.242337	0.66598	0.645897	3	57534/131405/5754	MIB1/TRIM71/PTK7
GO:0042089	cytokine biosynthetic process	3/254	120/17913	0.242337	0.66598	0.645897	3	5606/943/112744	MAP2K3/TNFRSF8/IL17F
GO:0051101	regulation of DNA binding	3/254	120/17913	0.242337	0.66598	0.645897	3	10459/1869/124857	MAD2L2/E2F1/WFIKKN2
GO:1905477	positive regulation of protein localization to membrane	3/254	120/17913	0.242337	0.66598	0.645897	3	3675/2048/1869	ITGA3/EPHB2/E2F1
GO:0006625	protein targeting to peroxisome	2/254	67/17913	0.245685	0.66598	0.645897	2	2053/5195	EPHX2/PEX14
GO:0010812	negative regulation of cell-substrate adhesion	2/254	67/17913	0.245685	0.66598	0.645897	2	10391/2651	CORO2B/GCNT2
GO:0042278	purine nucleoside metabolic process	2/254	67/17913	0.245685	0.66598	0.645897	2	4833/1740	NME4/DLG2
GO:0045669	positive regulation of osteoblast differentiation	2/254	67/17913	0.245685	0.66598	0.645897	2	4041/654	LRP5/BMP6
GO:0072662	protein localization to peroxisome	2/254	67/17913	0.245685	0.66598	0.645897	2	2053/5195	EPHX2/PEX14
GO:0072663	establishment of protein localization to peroxisome	2/254	67/17913	0.245685	0.66598	0.645897	2	2053/5195	EPHX2/PEX14
GO:0006720	isoprenoid metabolic process	3/254	121/17913	0.246121	0.66598	0.645897	3	375790/151056/9672	AGRN/PLB1/SDC3
GO:0042107	cytokine metabolic process	3/254	121/17913	0.246121	0.66598	0.645897	3	5606/943/112744	MAP2K3/TNFRSF8/IL17F
GO:0046718	viral entry into host cell	3/254	121/17913	0.246121	0.66598	0.645897	3	2219/6504/3356	FCN1/SLAMF1/HTR2A
GO:0006367	transcription initiation from RNA polymerase II promoter	4/254	178/17913	0.246293	0.66598	0.645897	4	5435/1871/2516/3172	POLR2F/E2F3/NR5A1/HNF4A
GO:0051346	negative regulation of hydrolase activity	8/254	420/17913	0.247145	0.66598	0.645897	8	3697/22853/4018/1740/55105/59082/10842/124857	ITIH1/LMTK2/LPA/DLG2/GPATCH2/CARD18/PPP1R17/WFIKKN2
GO:0002052	positive regulation of neuroblast proliferation	1/254	20/17913	0.248569	0.66598	0.645897	1	23440	OTP
GO:0006622	protein targeting to lysosome	1/254	20/17913	0.248569	0.66598	0.645897	1	9146	HGS
GO:0007289	spermatid nucleus differentiation	1/254	20/17913	0.248569	0.66598	0.645897	1	23198	PSME4
GO:0010801	negative regulation of peptidyl-threonine phosphorylation	1/254	20/17913	0.248569	0.66598	0.645897	1	51763	INPP5K
GO:0014046	dopamine secretion	1/254	20/17913	0.248569	0.66598	0.645897	1	3356	HTR2A
GO:0014059	regulation of dopamine secretion	1/254	20/17913	0.248569	0.66598	0.645897	1	3356	HTR2A
GO:0015874	norepinephrine transport	1/254	20/17913	0.248569	0.66598	0.645897	1	11188	NISCH
GO:0032769	negative regulation of monooxygenase activity	1/254	20/17913	0.248569	0.66598	0.645897	1	493	ATP2B4
GO:0033630	positive regulation of cell adhesion mediated by integrin	1/254	20/17913	0.248569	0.66598	0.645897	1	8631	SKAP1
GO:0034393	positive regulation of smooth muscle cell apoptotic process	1/254	20/17913	0.248569	0.66598	0.645897	1	1871	E2F3
GO:0042053	regulation of dopamine metabolic process	1/254	20/17913	0.248569	0.66598	0.645897	1	25953	PNKD
GO:0042069	regulation of catecholamine metabolic process	1/254	20/17913	0.248569	0.66598	0.645897	1	25953	PNKD
GO:0043586	tongue development	1/254	20/17913	0.248569	0.66598	0.645897	1	63976	PRDM16
GO:0043984	histone H4-K16 acetylation	1/254	20/17913	0.248569	0.66598	0.645897	1	3054	HCFC1
GO:0045019	negative regulation of nitric oxide biosynthetic process	1/254	20/17913	0.248569	0.66598	0.645897	1	493	ATP2B4
GO:0045821	positive regulation of glycolytic process	1/254	20/17913	0.248569	0.66598	0.645897	1	3356	HTR2A
GO:0046823	negative regulation of nucleocytoplasmic transport	1/254	20/17913	0.248569	0.66598	0.645897	1	580	BARD1
GO:0048846	axon extension involved in axon guidance	1/254	20/17913	0.248569	0.66598	0.645897	1	6586	SLIT3
GO:0051797	regulation of hair follicle development	1/254	20/17913	0.248569	0.66598	0.645897	1	51083	GAL
GO:0060216	definitive hemopoiesis	1/254	20/17913	0.248569	0.66598	0.645897	1	7049	TGFBR3
GO:0060487	lung epithelial cell differentiation	1/254	20/17913	0.248569	0.66598	0.645897	1	55151	TMEM38B
GO:0060713	labyrinthine layer morphogenesis	1/254	20/17913	0.248569	0.66598	0.645897	1	8648	NCOA1
GO:0061162	establishment of monopolar cell polarity	1/254	20/17913	0.248569	0.66598	0.645897	1	5754	PTK7
GO:0097734	extracellular exosome biogenesis	1/254	20/17913	0.248569	0.66598	0.645897	1	9146	HGS
GO:1902284	neuron projection extension involved in neuron projection guidance	1/254	20/17913	0.248569	0.66598	0.645897	1	6586	SLIT3
GO:1904406	negative regulation of nitric oxide metabolic process	1/254	20/17913	0.248569	0.66598	0.645897	1	493	ATP2B4
GO:1905523	positive regulation of macrophage migration	1/254	20/17913	0.248569	0.66598	0.645897	1	79647	AKIRIN1
GO:2001014	regulation of skeletal muscle cell differentiation	1/254	20/17913	0.248569	0.66598	0.645897	1	79647	AKIRIN1
GO:0042692	muscle cell differentiation	7/254	359/17913	0.248783	0.66598	0.645897	7	2318/90342/1496/11155/7290/575/124857	FLNC/FER1L5/CTNNA2/LDB3/HIRA/ADGRB1/WFIKKN2
GO:0000086	G2/M transition of mitotic cell cycle	5/254	238/17913	0.249505	0.66598	0.645897	5	10083/5890/23198/1785/5682	USH1C/RAD51B/PSME4/DNM2/PSMA1
GO:1903409	reactive oxygen species biosynthetic process	3/254	122/17913	0.249915	0.66598	0.645897	3	493/575/1785	ATP2B4/ADGRB1/DNM2
GO:0019932	second-messenger-mediated signaling	7/254	360/17913	0.250922	0.66598	0.645897	7	493/23261/55151/9699/51083/2516/4724	ATP2B4/CAMTA1/TMEM38B/RIMS2/GAL/NR5A1/NDUFS4
GO:0043574	peroxisomal transport	2/254	68/17913	0.250943	0.66598	0.645897	2	2053/5195	EPHX2/PEX14
GO:0051304	chromosome separation	2/254	68/17913	0.250943	0.66598	0.645897	2	10459/57520	MAD2L2/HECW2
GO:0060038	cardiac muscle cell proliferation	2/254	68/17913	0.250943	0.66598	0.645897	2	65009/7049	NDRG4/TGFBR3
GO:0086003	cardiac muscle cell contraction	2/254	68/17913	0.250943	0.66598	0.645897	2	29119/5142	CTNNA3/PDE4B
GO:0043902	positive regulation of multi-organism process	4/254	180/17913	0.252461	0.66598	0.645897	4	654/151056/5435/23643	BMP6/PLB1/POLR2F/LY96
GO:0050852	T cell receptor signaling pathway	4/254	180/17913	0.252461	0.66598	0.645897	4	23198/8631/5682/5142	PSME4/SKAP1/PSMA1/PDE4B
GO:0001736	establishment of planar polarity	3/254	123/17913	0.253717	0.66598	0.645897	3	23198/5754/5682	PSME4/PTK7/PSMA1
GO:0007164	establishment of tissue polarity	3/254	123/17913	0.253717	0.66598	0.645897	3	23198/5754/5682	PSME4/PTK7/PSMA1
GO:0006650	glycerophospholipid metabolic process	6/254	300/17913	0.253745	0.66598	0.645897	6	5297/7915/51763/151056/1103/3356	PI4KA/ALDH5A1/INPP5K/PLB1/CHAT/HTR2A
GO:0043401	steroid hormone mediated signaling pathway	4/254	181/17913	0.255558	0.66598	0.645897	4	133522/2516/8648/3172	PPARGC1B/NR5A1/NCOA1/HNF4A
GO:1905475	regulation of protein localization to membrane	4/254	181/17913	0.255558	0.66598	0.645897	4	3675/2048/51763/1869	ITGA3/EPHB2/INPP5K/E2F1
GO:0046879	hormone secretion	6/254	301/17913	0.256115	0.66598	0.645897	6	654/773/10815/9699/51083/3172	BMP6/CACNA1A/CPLX1/RIMS2/GAL/HNF4A
GO:0006353	DNA-templated transcription, termination	2/254	69/17913	0.256205	0.66598	0.645897	2	5435/25885	POLR2F/POLR1A
GO:0006446	regulation of translational initiation	2/254	69/17913	0.256205	0.66598	0.645897	2	4869/8672	NPM1/EIF4G3
GO:0031146	SCF-dependent proteasomal ubiquitin-dependent protein catabolic process	2/254	69/17913	0.256205	0.66598	0.645897	2	23198/5682	PSME4/PSMA1
GO:0051865	protein autoubiquitination	2/254	69/17913	0.256205	0.66598	0.645897	2	131405/55182	TRIM71/RNF220
GO:1903312	negative regulation of mRNA metabolic process	2/254	69/17913	0.256205	0.66598	0.645897	2	1869/580	E2F1/BARD1
GO:0030072	peptide hormone secretion	5/254	241/17913	0.257492	0.66598	0.645897	5	773/10815/9699/51083/3172	CACNA1A/CPLX1/RIMS2/GAL/HNF4A
GO:1901617	organic hydroxy compound biosynthetic process	5/254	241/17913	0.257492	0.66598	0.645897	5	51422/654/29881/114883/7299	PRKAG2/BMP6/NPC1L1/OSBPL9/TYR
GO:0003158	endothelium development	3/254	124/17913	0.257527	0.66598	0.645897	3	55810/654/26051	FOXJ2/BMP6/PPP1R16B
GO:0042177	negative regulation of protein catabolic process	3/254	124/17913	0.257527	0.66598	0.645897	3	10459/575/337867	MAD2L2/ADGRB1/UBAC2
GO:0046394	carboxylic acid biosynthetic process	8/254	426/17913	0.259015	0.66598	0.645897	8	493/51422/114883/339896/84532/2053/10090/3356	ATP2B4/PRKAG2/OSBPL9/GADL1/ACSS1/EPHX2/UST/HTR2A
GO:0003094	glomerular filtration	1/254	21/17913	0.259236	0.66598	0.645897	1	10391	CORO2B
GO:0006067	ethanol metabolic process	1/254	21/17913	0.259236	0.66598	0.645897	1	84532	ACSS1
GO:0006085	acetyl-CoA biosynthetic process	1/254	21/17913	0.259236	0.66598	0.645897	1	84532	ACSS1
GO:0006907	pinocytosis	1/254	21/17913	0.259236	0.66598	0.645897	1	1785	DNM2
GO:0010829	negative regulation of glucose transmembrane transport	1/254	21/17913	0.259236	0.66598	0.645897	1	51763	INPP5K
GO:0010893	positive regulation of steroid biosynthetic process	1/254	21/17913	0.259236	0.66598	0.645897	1	654	BMP6
GO:0015721	bile acid and bile salt transport	1/254	21/17913	0.259236	0.66598	0.645897	1	8648	NCOA1
GO:0017000	antibiotic biosynthetic process	1/254	21/17913	0.259236	0.66598	0.645897	1	84532	ACSS1
GO:0023058	adaptation of signaling pathway	1/254	21/17913	0.259236	0.66598	0.645897	1	1785	DNM2
GO:0031290	retinal ganglion cell axon guidance	1/254	21/17913	0.259236	0.66598	0.645897	1	2048	EPHB2
GO:0032373	positive regulation of sterol transport	1/254	21/17913	0.259236	0.66598	0.645897	1	26154	ABCA12
GO:0032376	positive regulation of cholesterol transport	1/254	21/17913	0.259236	0.66598	0.645897	1	26154	ABCA12
GO:0032462	regulation of protein homooligomerization	1/254	21/17913	0.259236	0.66598	0.645897	1	5195	PEX14
GO:0036507	protein demannosylation	1/254	21/17913	0.259236	0.66598	0.645897	1	57134	MAN1C1
GO:0036508	protein alpha-1,2-demannosylation	1/254	21/17913	0.259236	0.66598	0.645897	1	57134	MAN1C1
GO:0042135	neurotransmitter catabolic process	1/254	21/17913	0.259236	0.66598	0.645897	1	7915	ALDH5A1
GO:0042438	melanin biosynthetic process	1/254	21/17913	0.259236	0.66598	0.645897	1	7299	TYR
GO:0042451	purine nucleoside biosynthetic process	1/254	21/17913	0.259236	0.66598	0.645897	1	4833	NME4
GO:0042749	regulation of circadian sleep/wake cycle	1/254	21/17913	0.259236	0.66598	0.645897	1	3062	HCRTR2
GO:0046058	cAMP metabolic process	1/254	21/17913	0.259236	0.66598	0.645897	1	5142	PDE4B
GO:0046129	purine ribonucleoside biosynthetic process	1/254	21/17913	0.259236	0.66598	0.645897	1	4833	NME4
GO:0046132	pyrimidine ribonucleoside biosynthetic process	1/254	21/17913	0.259236	0.66598	0.645897	1	4833	NME4
GO:0051043	regulation of membrane protein ectodomain proteolysis	1/254	21/17913	0.259236	0.66598	0.645897	1	4898	NRDC
GO:0051589	negative regulation of neurotransmitter transport	1/254	21/17913	0.259236	0.66598	0.645897	1	25953	PNKD
GO:0060479	lung cell differentiation	1/254	21/17913	0.259236	0.66598	0.645897	1	55151	TMEM38B
GO:0060575	intestinal epithelial cell differentiation	1/254	21/17913	0.259236	0.66598	0.645897	1	1045	CDX2
GO:0061339	establishment or maintenance of monopolar cell polarity	1/254	21/17913	0.259236	0.66598	0.645897	1	5754	PTK7
GO:0070920	regulation of production of small RNA involved in gene silencing by RNA	1/254	21/17913	0.259236	0.66598	0.645897	1	5605	MAP2K2
GO:0099563	modification of synaptic structure	1/254	21/17913	0.259236	0.66598	0.645897	1	1496	CTNNA2
GO:0032147	activation of protein kinase activity	6/254	303/17913	0.260873	0.66598	0.645897	6	5606/51422/5605/5608/2911/57521	MAP2K3/PRKAG2/MAP2K2/MAP2K6/GRM1/RPTOR
GO:0016053	organic acid biosynthetic process	8/254	427/17913	0.261011	0.66598	0.645897	8	493/51422/114883/339896/84532/2053/10090/3356	ATP2B4/PRKAG2/OSBPL9/GADL1/ACSS1/EPHX2/UST/HTR2A
GO:0033045	regulation of sister chromatid segregation	2/254	70/17913	0.261468	0.66598	0.645897	2	10459/57520	MAD2L2/HECW2
GO:0010256	endomembrane system organization	7/254	365/17913	0.261698	0.66598	0.645897	7	9146/5605/65055/3801/55151/9101/1785	HGS/MAP2K2/REEP1/KIFC3/TMEM38B/USP8/DNM2
GO:0048639	positive regulation of developmental growth	4/254	183/17913	0.261774	0.66598	0.645897	4	375790/7049/9699/23499	AGRN/TGFBR3/RIMS2/MACF1
GO:0071219	cellular response to molecule of bacterial origin	4/254	183/17913	0.261774	0.66598	0.645897	4	3055/654/5142/23643	HCK/BMP6/PDE4B/LY96
GO:0071383	cellular response to steroid hormone stimulus	5/254	243/17913	0.262851	0.66598	0.645897	5	133522/9101/2516/8648/3172	PPARGC1B/USP8/NR5A1/NCOA1/HNF4A
GO:0030010	establishment of cell polarity	3/254	126/17913	0.265171	0.66598	0.645897	3	5754/10090/4134	PTK7/UST/MAP4
GO:0097553	calcium ion transmembrane import into cytosol	3/254	126/17913	0.265171	0.66598	0.645897	3	493/55151/3356	ATP2B4/TMEM38B/HTR2A
GO:0031330	negative regulation of cellular catabolic process	5/254	244/17913	0.26554	0.66598	0.645897	5	493/5768/1869/54922/337867	ATP2B4/QSOX1/E2F1/RASIP1/UBAC2
GO:0001707	mesoderm formation	2/254	71/17913	0.266732	0.66598	0.645897	2	3675/2139	ITGA3/EYA2
GO:0005977	glycogen metabolic process	2/254	71/17913	0.266732	0.66598	0.645897	2	51763/51422	INPP5K/PRKAG2
GO:0060998	regulation of dendritic spine development	2/254	71/17913	0.266732	0.66598	0.645897	2	26052/85358	DNM3/SHANK3
GO:0070664	negative regulation of leukocyte proliferation	2/254	71/17913	0.266732	0.66598	0.645897	2	5169/51083	ENPP3/GAL
GO:2000300	regulation of synaptic vesicle exocytosis	2/254	71/17913	0.266732	0.66598	0.645897	2	10815/3356	CPLX1/HTR2A
GO:0048839	inner ear development	4/254	185/17913	0.26802	0.66598	0.645897	4	2048/10083/341640/5754	EPHB2/USH1C/FREM2/PTK7
GO:1902115	regulation of organelle assembly	4/254	185/17913	0.26802	0.66598	0.645897	4	3055/4869/1785/4134	HCK/NPM1/DNM2/MAP4
GO:0051098	regulation of binding	7/254	368/17913	0.268226	0.66598	0.645897	7	10459/1869/7049/59082/5792/5195/124857	MAD2L2/E2F1/TGFBR3/CARD18/PTPRF/PEX14/WFIKKN2
GO:0031333	negative regulation of protein complex assembly	3/254	127/17913	0.269004	0.66598	0.645897	3	753/57482/5195	LDLRAD4/KIAA1211/PEX14
GO:0060078	regulation of postsynaptic membrane potential	3/254	127/17913	0.269004	0.66598	0.645897	3	9699/2911/85358	RIMS2/GRM1/SHANK3
GO:0001539	cilium or flagellum-dependent cell motility	1/254	22/17913	0.269752	0.66598	0.645897	1	1768	DNAH6
GO:0006541	glutamine metabolic process	1/254	22/17913	0.269752	0.66598	0.645897	1	7915	ALDH5A1
GO:0006582	melanin metabolic process	1/254	22/17913	0.269752	0.66598	0.645897	1	7299	TYR
GO:0006623	protein targeting to vacuole	1/254	22/17913	0.269752	0.66598	0.645897	1	9146	HGS
GO:0007398	ectoderm development	1/254	22/17913	0.269752	0.66598	0.645897	1	7709	ZBTB17
GO:0009068	aspartate family amino acid catabolic process	1/254	22/17913	0.269752	0.66598	0.645897	1	80150	ASRGL1
GO:0009220	pyrimidine ribonucleotide biosynthetic process	1/254	22/17913	0.269752	0.66598	0.645897	1	4833	NME4
GO:0009235	cobalamin metabolic process	1/254	22/17913	0.269752	0.66598	0.645897	1	440387	CTRB2
GO:0009595	detection of biotic stimulus	1/254	22/17913	0.269752	0.66598	0.645897	1	23643	LY96
GO:0018126	protein hydroxylation	1/254	22/17913	0.269752	0.66598	0.645897	1	55214	P3H2
GO:0030813	positive regulation of nucleotide catabolic process	1/254	22/17913	0.269752	0.66598	0.645897	1	3356	HTR2A
GO:0032594	protein transport within lipid bilayer	1/254	22/17913	0.269752	0.66598	0.645897	1	10815	CPLX1
GO:0032682	negative regulation of chemokine production	1/254	22/17913	0.269752	0.66598	0.645897	1	55914	ERBIN
GO:0034695	response to prostaglandin E	1/254	22/17913	0.269752	0.66598	0.645897	1	7049	TGFBR3
GO:0035809	regulation of urine volume	1/254	22/17913	0.269752	0.66598	0.645897	1	51763	INPP5K
GO:0042094	interleukin-2 biosynthetic process	1/254	22/17913	0.269752	0.66598	0.645897	1	112744	IL17F
GO:0044743	protein transmembrane import into intracellular organelle	1/254	22/17913	0.269752	0.66598	0.645897	1	5195	PEX14
GO:0046835	carbohydrate phosphorylation	1/254	22/17913	0.269752	0.66598	0.645897	1	55277	FGGY
GO:0046856	phosphatidylinositol dephosphorylation	1/254	22/17913	0.269752	0.66598	0.645897	1	51763	INPP5K
GO:0051197	positive regulation of coenzyme metabolic process	1/254	22/17913	0.269752	0.66598	0.645897	1	3356	HTR2A
GO:0060285	cilium-dependent cell motility	1/254	22/17913	0.269752	0.66598	0.645897	1	1768	DNAH6
GO:0060390	regulation of SMAD protein signal transduction	1/254	22/17913	0.269752	0.66598	0.645897	1	654	BMP6
GO:0071359	cellular response to dsRNA	1/254	22/17913	0.269752	0.66598	0.645897	1	4869	NPM1
GO:0071875	adrenergic receptor signaling pathway	1/254	22/17913	0.269752	0.66598	0.645897	1	493	ATP2B4
GO:0140112	extracellular vesicle biogenesis	1/254	22/17913	0.269752	0.66598	0.645897	1	9146	HGS
GO:1903429	regulation of cell maturation	1/254	22/17913	0.269752	0.66598	0.645897	1	51083	GAL
GO:1904666	regulation of ubiquitin protein ligase activity	1/254	22/17913	0.269752	0.66598	0.645897	1	10459	MAD2L2
GO:2001032	regulation of double-strand break repair via nonhomologous end joining	1/254	22/17913	0.269752	0.66598	0.645897	1	10459	MAD2L2
GO:0009100	glycoprotein metabolic process	7/254	369/17913	0.270412	0.66598	0.645897	7	57134/64788/374378/2651/433/10090/29906	MAN1C1/LMF1/GALNT18/GCNT2/ASGR2/UST/ST8SIA5
GO:0009416	response to light stimulus	6/254	307/17913	0.270458	0.66598	0.645897	6	65009/57654/4869/1785/7299/51435	NDRG4/UVSSA/NPM1/DNM2/TYR/SCARA3
GO:0070374	positive regulation of ERK1 and ERK2 cascade	4/254	186/17913	0.271153	0.66598	0.645897	4	65009/6504/2651/3356	NDRG4/SLAMF1/GCNT2/HTR2A
GO:0002532	production of molecular mediator involved in inflammatory response	2/254	72/17913	0.271996	0.66598	0.645897	2	84818/112744	IL17RC/IL17F
GO:0006073	cellular glucan metabolic process	2/254	72/17913	0.271996	0.66598	0.645897	2	51763/51422	INPP5K/PRKAG2
GO:0006081	cellular aldehyde metabolic process	2/254	72/17913	0.271996	0.66598	0.645897	2	654/25953	BMP6/PNKD
GO:0032677	regulation of interleukin-8 production	2/254	72/17913	0.271996	0.66598	0.645897	2	2219/112744	FCN1/IL17F
GO:0044042	glucan metabolic process	2/254	72/17913	0.271996	0.66598	0.645897	2	51763/51422	INPP5K/PRKAG2
GO:0050829	defense response to Gram-negative bacterium	2/254	72/17913	0.271996	0.66598	0.645897	2	58985/575	IL22RA1/ADGRB1
GO:0051651	maintenance of location in cell	2/254	72/17913	0.271996	0.66598	0.645897	2	580/2516	BARD1/NR5A1
GO:0072347	response to anesthetic	2/254	72/17913	0.271996	0.66598	0.645897	2	1785/3356	DNM2/HTR2A
GO:1902036	regulation of hematopoietic stem cell differentiation	2/254	72/17913	0.271996	0.66598	0.645897	2	23198/5682	PSME4/PSMA1
GO:1990266	neutrophil migration	2/254	72/17913	0.271996	0.66598	0.645897	2	7409/5142	VAV1/PDE4B
GO:0007498	mesoderm development	3/254	128/17913	0.272843	0.66598	0.645897	3	3675/3055/2139	ITGA3/HCK/EYA2
GO:0045667	regulation of osteoblast differentiation	3/254	128/17913	0.272843	0.66598	0.645897	3	4041/2662/654	LRP5/GDF10/BMP6
GO:0045995	regulation of embryonic development	3/254	128/17913	0.272843	0.66598	0.645897	3	1045/5754/3172	CDX2/PTK7/HNF4A
GO:0072175	epithelial tube formation	3/254	128/17913	0.272843	0.66598	0.645897	3	57534/131405/5754	MIB1/TRIM71/PTK7
GO:0006909	phagocytosis	6/254	308/17913	0.272868	0.66598	0.645897	6	2219/3055/6504/7409/575/1785	FCN1/HCK/SLAMF1/VAV1/ADGRB1/DNM2
GO:0017157	regulation of exocytosis	4/254	187/17913	0.274292	0.66598	0.645897	4	9146/10815/9699/3356	HGS/CPLX1/RIMS2/HTR2A
GO:0002768	immune response-regulating cell surface receptor signaling pathway	8/254	434/17913	0.275108	0.66598	0.645897	8	2219/3055/7409/5079/23198/8631/5682/5142	FCN1/HCK/VAV1/PAX5/PSME4/SKAP1/PSMA1/PDE4B
GO:0002237	response to molecule of bacterial origin	6/254	309/17913	0.275284	0.66598	0.645897	6	3055/7056/55914/654/5142/23643	HCK/THBD/ERBIN/BMP6/PDE4B/LY96
GO:0006165	nucleoside diphosphate phosphorylation	3/254	129/17913	0.276687	0.66598	0.645897	3	4833/51422/3356	NME4/PRKAG2/HTR2A
GO:0008037	cell recognition	3/254	129/17913	0.276687	0.66598	0.645897	3	2219/2048/575	FCN1/EPHB2/ADGRB1
GO:0051588	regulation of neurotransmitter transport	3/254	129/17913	0.276687	0.66598	0.645897	3	10815/25953/3356	CPLX1/PNKD/HTR2A
GO:0009314	response to radiation	8/254	435/17913	0.277139	0.66598	0.645897	8	65009/7056/57654/4869/1785/7299/51435/64240	NDRG4/THBD/UVSSA/NPM1/DNM2/TYR/SCARA3/ABCG5
GO:0001895	retina homeostasis	2/254	73/17913	0.277258	0.66598	0.645897	2	10083/94137	USH1C/RP1L1
GO:0006283	transcription-coupled nucleotide-excision repair	2/254	73/17913	0.277258	0.66598	0.645897	2	57654/5435	UVSSA/POLR2F
GO:0007032	endosome organization	2/254	73/17913	0.277258	0.66598	0.645897	2	9146/9101	HGS/USP8
GO:0008652	cellular amino acid biosynthetic process	2/254	73/17913	0.277258	0.66598	0.645897	2	493/339896	ATP2B4/GADL1
GO:0021536	diencephalon development	2/254	73/17913	0.277258	0.66598	0.645897	2	8648/23440	NCOA1/OTP
GO:0048332	mesoderm morphogenesis	2/254	73/17913	0.277258	0.66598	0.645897	2	3675/2139	ITGA3/EYA2
GO:0019722	calcium-mediated signaling	4/254	188/17913	0.277438	0.66598	0.645897	4	493/23261/55151/2516	ATP2B4/CAMTA1/TMEM38B/NR5A1
GO:0030595	leukocyte chemotaxis	4/254	188/17913	0.277438	0.66598	0.645897	4	7409/84818/5142/79647	VAV1/IL17RC/PDE4B/AKIRIN1
GO:0048002	antigen processing and presentation of peptide antigen	4/254	188/17913	0.277438	0.66598	0.645897	4	23198/1785/5682/4012	PSME4/DNM2/PSMA1/LNPEP
GO:0045787	positive regulation of cell cycle	7/254	373/17913	0.279205	0.66598	0.645897	7	7709/4041/1869/5890/4869/3054/57521	ZBTB17/LRP5/E2F1/RAD51B/NPM1/HCFC1/RPTOR
GO:0000729	DNA double-strand break processing	1/254	23/17913	0.280119	0.66598	0.645897	1	580	BARD1
GO:0002347	response to tumor cell	1/254	23/17913	0.280119	0.66598	0.645897	1	27303	RBMS3
GO:0006359	regulation of transcription by RNA polymerase III	1/254	23/17913	0.280119	0.66598	0.645897	1	57521	RPTOR
GO:0006884	cell volume homeostasis	1/254	23/17913	0.280119	0.66598	0.645897	1	85358	SHANK3
GO:0007413	axonal fasciculation	1/254	23/17913	0.280119	0.66598	0.645897	1	2048	EPHB2
GO:0007530	sex determination	1/254	23/17913	0.280119	0.66598	0.645897	1	2516	NR5A1
GO:0007617	mating behavior	1/254	23/17913	0.280119	0.66598	0.645897	1	8648	NCOA1
GO:0009310	amine catabolic process	1/254	23/17913	0.280119	0.66598	0.645897	1	493	ATP2B4
GO:0010758	regulation of macrophage chemotaxis	1/254	23/17913	0.280119	0.66598	0.645897	1	79647	AKIRIN1
GO:0016338	calcium-independent cell-cell adhesion via plasma membrane cell-adhesion molecules	1/254	23/17913	0.280119	0.66598	0.645897	1	5010	CLDN11
GO:0030539	male genitalia development	1/254	23/17913	0.280119	0.66598	0.645897	1	654	BMP6
GO:0034453	microtubule anchoring	1/254	23/17913	0.280119	0.66598	0.645897	1	5195	PEX14
GO:0042537	benzene-containing compound metabolic process	1/254	23/17913	0.280119	0.66598	0.645897	1	1580	CYP4B1
GO:0045603	positive regulation of endothelial cell differentiation	1/254	23/17913	0.280119	0.66598	0.645897	1	654	BMP6
GO:0051004	regulation of lipoprotein lipase activity	1/254	23/17913	0.280119	0.66598	0.645897	1	64788	LMF1
GO:0051570	regulation of histone H3-K9 methylation	1/254	23/17913	0.280119	0.66598	0.645897	1	5079	PAX5
GO:0051968	positive regulation of synaptic transmission, glutamatergic	1/254	23/17913	0.280119	0.66598	0.645897	1	85358	SHANK3
GO:0060143	positive regulation of syncytium formation by plasma membrane fusion	1/254	23/17913	0.280119	0.66598	0.645897	1	575	ADGRB1
GO:0061436	establishment of skin barrier	1/254	23/17913	0.280119	0.66598	0.645897	1	26154	ABCA12
GO:0072666	establishment of protein localization to vacuole	1/254	23/17913	0.280119	0.66598	0.645897	1	9146	HGS
GO:0106030	neuron projection fasciculation	1/254	23/17913	0.280119	0.66598	0.645897	1	2048	EPHB2
GO:1900746	regulation of vascular endothelial growth factor signaling pathway	1/254	23/17913	0.280119	0.66598	0.645897	1	57556	SEMA6A
GO:1903589	positive regulation of blood vessel endothelial cell proliferation involved in sprouting angiogenesis	1/254	23/17913	0.280119	0.66598	0.645897	1	26051	PPP1R16B
GO:1903861	positive regulation of dendrite extension	1/254	23/17913	0.280119	0.66598	0.645897	1	9699	RIMS2
GO:0009914	hormone transport	6/254	311/17913	0.28013	0.66598	0.645897	6	654/773/10815/9699/51083/3172	BMP6/CACNA1A/CPLX1/RIMS2/GAL/HNF4A
GO:0016999	antibiotic metabolic process	3/254	130/17913	0.280537	0.66598	0.645897	3	7915/1580/84532	ALDH5A1/CYP4B1/ACSS1
GO:0051224	negative regulation of protein transport	4/254	189/17913	0.280589	0.66598	0.645897	4	51763/580/59082/337867	INPP5K/BARD1/CARD18/UBAC2
GO:0043406	positive regulation of MAP kinase activity	5/254	250/17913	0.281802	0.66598	0.645897	5	5606/5605/5608/2911/3356	MAP2K3/MAP2K2/MAP2K6/GRM1/HTR2A
GO:0090596	sensory organ morphogenesis	5/254	250/17913	0.281802	0.66598	0.645897	5	2048/4041/10083/5754/22882	EPHB2/LRP5/USH1C/PTK7/ZHX2
GO:0046902	regulation of mitochondrial membrane permeability	2/254	74/17913	0.282518	0.66598	0.645897	2	1869/2139	E2F1/EYA2
GO:0070373	negative regulation of ERK1 and ERK2 cascade	2/254	74/17913	0.282518	0.66598	0.645897	2	2048/57556	EPHB2/SEMA6A
GO:0046939	nucleotide phosphorylation	3/254	131/17913	0.284393	0.66598	0.645897	3	4833/51422/3356	NME4/PRKAG2/HTR2A
GO:0008654	phospholipid biosynthetic process	5/254	251/17913	0.284532	0.66598	0.645897	5	5297/51763/55151/1103/3356	PI4KA/INPP5K/TMEM38B/CHAT/HTR2A
GO:0006643	membrane lipid metabolic process	4/254	191/17913	0.286909	0.66598	0.645897	4	7915/285362/8869/29906	ALDH5A1/SUMF1/ST3GAL5/ST8SIA5
GO:1901654	response to ketone	4/254	191/17913	0.286909	0.66598	0.645897	4	7049/9101/8648/6586	TGFBR3/USP8/NCOA1/SLIT3
GO:0045088	regulation of innate immune response	8/254	440/17913	0.287357	0.66598	0.645897	8	2219/3055/7409/55914/23198/5608/5682/23643	FCN1/HCK/VAV1/ERBIN/PSME4/MAP2K6/PSMA1/LY96
GO:0010506	regulation of autophagy	6/254	314/17913	0.287435	0.66598	0.645897	6	55255/5768/51422/54922/2017/57521	WDR41/QSOX1/PRKAG2/RASIP1/CTTN/RPTOR
GO:0002479	antigen processing and presentation of exogenous peptide antigen via MHC class I, TAP-dependent	2/254	75/17913	0.287775	0.66598	0.645897	2	23198/5682	PSME4/PSMA1
GO:0006110	regulation of glycolytic process	2/254	75/17913	0.287775	0.66598	0.645897	2	51422/3356	PRKAG2/HTR2A
GO:0016126	sterol biosynthetic process	2/254	75/17913	0.287775	0.66598	0.645897	2	51422/29881	PRKAG2/NPC1L1
GO:0031016	pancreas development	2/254	75/17913	0.287775	0.66598	0.645897	2	654/3172	BMP6/HNF4A
GO:0031100	animal organ regeneration	2/254	75/17913	0.287775	0.66598	0.645897	2	10076/7049	PTPRU/TGFBR3
GO:0035050	embryonic heart tube development	2/254	75/17913	0.287775	0.66598	0.645897	2	65009/57534	NDRG4/MIB1
GO:0048678	response to axon injury	2/254	75/17913	0.287775	0.66598	0.645897	2	146760/5792	RTN4RL1/PTPRF
GO:0072332	intrinsic apoptotic signaling pathway by p53 class mediator	2/254	75/17913	0.287775	0.66598	0.645897	2	1869/151126	E2F1/ZNF385B
GO:0050715	positive regulation of cytokine secretion	3/254	132/17913	0.288252	0.66598	0.645897	3	2219/84818/112744	FCN1/IL17RC/IL17F
GO:0032103	positive regulation of response to external stimulus	6/254	315/17913	0.289879	0.66598	0.645897	6	7056/654/84818/23643/79647/112744	THBD/BMP6/IL17RC/LY96/AKIRIN1/IL17F
GO:0030258	lipid modification	4/254	192/17913	0.290076	0.66598	0.645897	4	5297/51763/51422/2053	PI4KA/INPP5K/PRKAG2/EPHX2
GO:0002861	regulation of inflammatory response to antigenic stimulus	1/254	24/17913	0.29034	0.66598	0.645897	1	5682	PSMA1
GO:0003181	atrioventricular valve morphogenesis	1/254	24/17913	0.29034	0.66598	0.645897	1	6586	SLIT3
GO:0008211	glucocorticoid metabolic process	1/254	24/17913	0.29034	0.66598	0.645897	1	51083	GAL
GO:0009218	pyrimidine ribonucleotide metabolic process	1/254	24/17913	0.29034	0.66598	0.645897	1	4833	NME4
GO:0010881	regulation of cardiac muscle contraction by regulation of the release of sequestered calcium ion	1/254	24/17913	0.29034	0.66598	0.645897	1	55151	TMEM38B
GO:0010971	positive regulation of G2/M transition of mitotic cell cycle	1/254	24/17913	0.29034	0.66598	0.645897	1	5890	RAD51B
GO:0022410	circadian sleep/wake cycle process	1/254	24/17913	0.29034	0.66598	0.645897	1	3062	HCRTR2
GO:0030325	adrenal gland development	1/254	24/17913	0.29034	0.66598	0.645897	1	2516	NR5A1
GO:0030488	tRNA methylation	1/254	24/17913	0.29034	0.66598	0.645897	1	10785	WDR4
GO:0032528	microvillus organization	1/254	24/17913	0.29034	0.66598	0.645897	1	10083	USH1C
GO:0032897	negative regulation of viral transcription	1/254	24/17913	0.29034	0.66598	0.645897	1	51763	INPP5K
GO:0043951	negative regulation of cAMP-mediated signaling	1/254	24/17913	0.29034	0.66598	0.645897	1	493	ATP2B4
GO:0045954	positive regulation of natural killer cell mediated cytotoxicity	1/254	24/17913	0.29034	0.66598	0.645897	1	7409	VAV1
GO:0062009	secondary palate development	1/254	24/17913	0.29034	0.66598	0.645897	1	7049	TGFBR3
GO:0090103	cochlea morphogenesis	1/254	24/17913	0.29034	0.66598	0.645897	1	5754	PTK7
GO:1902547	regulation of cellular response to vascular endothelial growth factor stimulus	1/254	24/17913	0.29034	0.66598	0.645897	1	57556	SEMA6A
GO:1903421	regulation of synaptic vesicle recycling	1/254	24/17913	0.29034	0.66598	0.645897	1	26052	DNM3
GO:1903649	regulation of cytoplasmic transport	1/254	24/17913	0.29034	0.66598	0.645897	1	5605	MAP2K2
GO:0009135	purine nucleoside diphosphate metabolic process	3/254	133/17913	0.292116	0.66598	0.645897	3	51422/1740/3356	PRKAG2/DLG2/HTR2A
GO:0009179	purine ribonucleoside diphosphate metabolic process	3/254	133/17913	0.292116	0.66598	0.645897	3	51422/1740/3356	PRKAG2/DLG2/HTR2A
GO:0006809	nitric oxide biosynthetic process	2/254	76/17913	0.293028	0.66598	0.645897	2	493/1785	ATP2B4/DNM2
GO:0031397	negative regulation of protein ubiquitination	2/254	76/17913	0.293028	0.66598	0.645897	2	10459/575	MAD2L2/ADGRB1
GO:1902803	regulation of synaptic vesicle transport	2/254	76/17913	0.293028	0.66598	0.645897	2	10815/3356	CPLX1/HTR2A
GO:0060541	respiratory system development	4/254	193/17913	0.293249	0.66598	0.645897	4	3675/26154/5754/55151	ITGA3/ABCA12/PTK7/TMEM38B
GO:0030260	entry into host cell	3/254	134/17913	0.295983	0.66598	0.645897	3	2219/6504/3356	FCN1/SLAMF1/HTR2A
GO:0031644	regulation of neurological system process	3/254	134/17913	0.295983	0.66598	0.645897	3	9699/2911/85358	RIMS2/GRM1/SHANK3
GO:0044409	entry into host	3/254	134/17913	0.295983	0.66598	0.645897	3	2219/6504/3356	FCN1/SLAMF1/HTR2A
GO:0051806	entry into cell of other organism involved in symbiotic interaction	3/254	134/17913	0.295983	0.66598	0.645897	3	2219/6504/3356	FCN1/SLAMF1/HTR2A
GO:0051828	entry into other organism involved in symbiotic interaction	3/254	134/17913	0.295983	0.66598	0.645897	3	2219/6504/3356	FCN1/SLAMF1/HTR2A
GO:0006323	DNA packaging	4/254	194/17913	0.296426	0.66598	0.645897	4	23198/4869/22893/7290	PSME4/NPM1/BAHD1/HIRA
GO:2000377	regulation of reactive oxygen species metabolic process	4/254	194/17913	0.296426	0.66598	0.645897	4	493/5547/575/1785	ATP2B4/PRCP/ADGRB1/DNM2
GO:0072330	monocarboxylic acid biosynthetic process	6/254	318/17913	0.297238	0.66598	0.645897	6	51422/114883/84532/2053/10090/3356	PRKAG2/OSBPL9/ACSS1/EPHX2/UST/HTR2A
GO:0006892	post-Golgi vesicle-mediated transport	2/254	77/17913	0.298276	0.66598	0.645897	2	1785/23499	DNM2/MACF1
GO:0030279	negative regulation of ossification	2/254	77/17913	0.298276	0.66598	0.645897	2	4041/2662	LRP5/GDF10
GO:0030811	regulation of nucleotide catabolic process	2/254	77/17913	0.298276	0.66598	0.645897	2	51422/3356	PRKAG2/HTR2A
GO:0034109	homotypic cell-cell adhesion	2/254	77/17913	0.298276	0.66598	0.645897	2	10076/29119	PTPRU/CTNNA3
GO:0043044	ATP-dependent chromatin remodeling	2/254	77/17913	0.298276	0.66598	0.645897	2	23198/4869	PSME4/NPM1
GO:0060411	cardiac septum morphogenesis	2/254	77/17913	0.298276	0.66598	0.645897	2	7049/6586	TGFBR3/SLIT3
GO:0061418	regulation of transcription from RNA polymerase II promoter in response to hypoxia	2/254	77/17913	0.298276	0.66598	0.645897	2	23198/5682	PSME4/PSMA1
GO:0071260	cellular response to mechanical stimulus	2/254	77/17913	0.298276	0.66598	0.645897	2	654/943	BMP6/TNFRSF8
GO:0043624	cellular protein complex disassembly	4/254	195/17913	0.299607	0.66598	0.645897	4	57701/57553/57482/5195	NCKAP5L/MICAL3/KIAA1211/PEX14
GO:0046890	regulation of lipid biosynthetic process	4/254	195/17913	0.299607	0.66598	0.645897	4	51422/654/2516/3356	PRKAG2/BMP6/NR5A1/HTR2A
GO:0009185	ribonucleoside diphosphate metabolic process	3/254	135/17913	0.299854	0.66598	0.645897	3	51422/1740/3356	PRKAG2/DLG2/HTR2A
GO:0000038	very long-chain fatty acid metabolic process	1/254	25/17913	0.300416	0.66598	0.645897	1	28965	SLC27A6
GO:0001702	gastrulation with mouth forming second	1/254	25/17913	0.300416	0.66598	0.645897	1	7709	ZBTB17
GO:0001963	synaptic transmission, dopaminergic	1/254	25/17913	0.300416	0.66598	0.645897	1	25953	PNKD
GO:0003071	renal system process involved in regulation of systemic arterial blood pressure	1/254	25/17913	0.300416	0.66598	0.645897	1	10391	CORO2B
GO:0006517	protein deglycosylation	1/254	25/17913	0.300416	0.66598	0.645897	1	57134	MAN1C1
GO:0010669	epithelial structure maintenance	1/254	25/17913	0.300416	0.66598	0.645897	1	57482	KIAA1211
GO:0014829	vascular smooth muscle contraction	1/254	25/17913	0.300416	0.66598	0.645897	1	3356	HTR2A
GO:0021544	subpallium development	1/254	25/17913	0.300416	0.66598	0.645897	1	85358	SHANK3
GO:0030194	positive regulation of blood coagulation	1/254	25/17913	0.300416	0.66598	0.645897	1	7056	THBD
GO:0031338	regulation of vesicle fusion	1/254	25/17913	0.300416	0.66598	0.645897	1	10815	CPLX1
GO:0035640	exploration behavior	1/254	25/17913	0.300416	0.66598	0.645897	1	3675	ITGA3
GO:0042730	fibrinolysis	1/254	25/17913	0.300416	0.66598	0.645897	1	7056	THBD
GO:0042759	long-chain fatty acid biosynthetic process	1/254	25/17913	0.300416	0.66598	0.645897	1	2053	EPHX2
GO:0045408	regulation of interleukin-6 biosynthetic process	1/254	25/17913	0.300416	0.66598	0.645897	1	112744	IL17F
GO:0045672	positive regulation of osteoclast differentiation	1/254	25/17913	0.300416	0.66598	0.645897	1	133522	PPARGC1B
GO:0045830	positive regulation of isotype switching	1/254	25/17913	0.300416	0.66598	0.645897	1	10459	MAD2L2
GO:0046426	negative regulation of JAK-STAT cascade	1/254	25/17913	0.300416	0.66598	0.645897	1	9146	HGS
GO:0060669	embryonic placenta morphogenesis	1/254	25/17913	0.300416	0.66598	0.645897	1	8648	NCOA1
GO:0070861	regulation of protein exit from endoplasmic reticulum	1/254	25/17913	0.300416	0.66598	0.645897	1	337867	UBAC2
GO:0095500	acetylcholine receptor signaling pathway	1/254	25/17913	0.300416	0.66598	0.645897	1	375790	AGRN
GO:1900048	positive regulation of hemostasis	1/254	25/17913	0.300416	0.66598	0.645897	1	7056	THBD
GO:1900120	regulation of receptor binding	1/254	25/17913	0.300416	0.66598	0.645897	1	5792	PTPRF
GO:1900739	regulation of protein insertion into mitochondrial membrane involved in apoptotic signaling pathway	1/254	25/17913	0.300416	0.66598	0.645897	1	1869	E2F1
GO:1900740	positive regulation of protein insertion into mitochondrial membrane involved in apoptotic signaling pathway	1/254	25/17913	0.300416	0.66598	0.645897	1	1869	E2F1
GO:1903831	signal transduction involved in cellular response to ammonium ion	1/254	25/17913	0.300416	0.66598	0.645897	1	375790	AGRN
GO:1903859	regulation of dendrite extension	1/254	25/17913	0.300416	0.66598	0.645897	1	9699	RIMS2
GO:1905809	negative regulation of synapse organization	1/254	25/17913	0.300416	0.66598	0.645897	1	26052	DNM3
GO:2000482	regulation of interleukin-8 secretion	1/254	25/17913	0.300416	0.66598	0.645897	1	2219	FCN1
GO:0001570	vasculogenesis	2/254	78/17913	0.303517	0.671286	0.651043	2	54922/7049	RASIP1/TGFBR3
GO:0010827	regulation of glucose transmembrane transport	2/254	78/17913	0.303517	0.671286	0.651043	2	51763/51422	INPP5K/PRKAG2
GO:0032760	positive regulation of tumor necrosis factor production	2/254	78/17913	0.303517	0.671286	0.651043	2	943/23643	TNFRSF8/LY96
GO:0060041	retina development in camera-type eye	3/254	136/17913	0.303727	0.671286	0.651043	3	4041/493/22882	LRP5/ATP2B4/ZHX2
GO:0051656	establishment of organelle localization	8/254	448/17913	0.3039	0.671286	0.651043	8	9381/83696/10815/9699/1785/4134/5195/3356	OTOF/TRAPPC9/CPLX1/RIMS2/DNM2/MAP4/PEX14/HTR2A
GO:0002221	pattern recognition receptor signaling pathway	4/254	197/17913	0.305983	0.674932	0.654579	4	2219/55914/5608/23643	FCN1/ERBIN/MAP2K6/LY96
GO:0046486	glycerolipid metabolic process	7/254	385/17913	0.30599	0.674932	0.654579	7	5297/64788/7915/51763/151056/1103/3356	PI4KA/LMF1/ALDH5A1/INPP5K/PLB1/CHAT/HTR2A
GO:0001708	cell fate specification	2/254	79/17913	0.308752	0.675691	0.655315	2	2139/23040	EYA2/MYT1L
GO:0021766	hippocampus development	2/254	79/17913	0.308752	0.675691	0.655315	2	493/8648	ATP2B4/NCOA1
GO:0002053	positive regulation of mesenchymal cell proliferation	1/254	26/17913	0.31035	0.675691	0.655315	1	4041	LRP5
GO:0003171	atrioventricular valve development	1/254	26/17913	0.31035	0.675691	0.655315	1	6586	SLIT3
GO:0006700	C21-steroid hormone biosynthetic process	1/254	26/17913	0.31035	0.675691	0.655315	1	654	BMP6
GO:0007263	nitric oxide mediated signal transduction	1/254	26/17913	0.31035	0.675691	0.655315	1	493	ATP2B4
GO:0009154	purine ribonucleotide catabolic process	1/254	26/17913	0.31035	0.675691	0.655315	1	5142	PDE4B
GO:0021591	ventricular system development	1/254	26/17913	0.31035	0.675691	0.655315	1	5079	PAX5
GO:0031440	regulation of mRNA 3'-end processing	1/254	26/17913	0.31035	0.675691	0.655315	1	580	BARD1
GO:0033561	regulation of water loss via skin	1/254	26/17913	0.31035	0.675691	0.655315	1	26154	ABCA12
GO:0034377	plasma lipoprotein particle assembly	1/254	26/17913	0.31035	0.675691	0.655315	1	5326	PLAGL2
GO:0042044	fluid transport	1/254	26/17913	0.31035	0.675691	0.655315	1	51763	INPP5K
GO:0042255	ribosome assembly	1/254	26/17913	0.31035	0.675691	0.655315	1	4869	NPM1
GO:0050820	positive regulation of coagulation	1/254	26/17913	0.31035	0.675691	0.655315	1	7056	THBD
GO:0050919	negative chemotaxis	1/254	26/17913	0.31035	0.675691	0.655315	1	6586	SLIT3
GO:0060142	regulation of syncytium formation by plasma membrane fusion	1/254	26/17913	0.31035	0.675691	0.655315	1	575	ADGRB1
GO:0080154	regulation of fertilization	1/254	26/17913	0.31035	0.675691	0.655315	1	151056	PLB1
GO:0099560	synaptic membrane adhesion	1/254	26/17913	0.31035	0.675691	0.655315	1	5792	PTPRF
GO:0043062	extracellular structure organization	7/254	387/17913	0.310506	0.675691	0.655315	7	3675/440387/5768/5326/375790/4018/55151	ITGA3/CTRB2/QSOX1/PLAGL2/AGRN/LPA/TMEM38B
GO:0002064	epithelial cell development	4/254	199/17913	0.312372	0.676102	0.655713	4	654/26051/3172/57111	BMP6/PPP1R16B/HNF4A/RAB25
GO:0045785	positive regulation of cell adhesion	7/254	388/17913	0.312769	0.676102	0.655713	7	3675/7409/10076/2651/8631/1785/7402	ITGA3/VAV1/PTPRU/GCNT2/SKAP1/DNM2/UTRN
GO:0007031	peroxisome organization	2/254	80/17913	0.313979	0.676102	0.655713	2	2053/5195	EPHX2/PEX14
GO:0032637	interleukin-8 production	2/254	80/17913	0.313979	0.676102	0.655713	2	2219/112744	FCN1/IL17F
GO:0050886	endocrine process	2/254	80/17913	0.313979	0.676102	0.655713	2	654/51083	BMP6/GAL
GO:0001738	morphogenesis of a polarized epithelium	3/254	139/17913	0.315359	0.676102	0.655713	3	23198/5754/5682	PSME4/PTK7/PSMA1
GO:0032675	regulation of interleukin-6 production	3/254	139/17913	0.315359	0.676102	0.655713	3	6504/84818/112744	SLAMF1/IL17RC/IL17F
GO:0060968	regulation of gene silencing	3/254	139/17913	0.315359	0.676102	0.655713	3	131405/5605/5435	TRIM71/MAP2K2/POLR2F
GO:0070838	divalent metal ion transport	8/254	454/17913	0.316446	0.676102	0.655713	8	493/51763/7225/773/79054/55151/5142/3356	ATP2B4/INPP5K/TRPC6/CACNA1A/TRPM8/TMEM38B/PDE4B/HTR2A
GO:0051146	striated muscle cell differentiation	5/254	263/17913	0.317639	0.676102	0.655713	5	2318/90342/11155/575/124857	FLNC/FER1L5/LDB3/ADGRB1/WFIKKN2
GO:0050707	regulation of cytokine secretion	4/254	201/17913	0.318774	0.676102	0.655713	4	2219/59082/84818/112744	FCN1/CARD18/IL17RC/IL17F
GO:0006303	double-strand break repair via nonhomologous end joining	2/254	81/17913	0.319197	0.676102	0.655713	2	10459/580	MAD2L2/BARD1
GO:0030510	regulation of BMP signaling pathway	2/254	81/17913	0.319197	0.676102	0.655713	2	3675/23090	ITGA3/ZNF423
GO:0031145	anaphase-promoting complex-dependent catabolic process	2/254	81/17913	0.319197	0.676102	0.655713	2	23198/5682	PSME4/PSMA1
GO:0032755	positive regulation of interleukin-6 production	2/254	81/17913	0.319197	0.676102	0.655713	2	84818/112744	IL17RC/IL17F
GO:0046209	nitric oxide metabolic process	2/254	81/17913	0.319197	0.676102	0.655713	2	493/1785	ATP2B4/DNM2
GO:0046889	positive regulation of lipid biosynthetic process	2/254	81/17913	0.319197	0.676102	0.655713	2	654/3356	BMP6/HTR2A
GO:0061053	somite development	2/254	81/17913	0.319197	0.676102	0.655713	2	57534/1045	MIB1/CDX2
GO:1903557	positive regulation of tumor necrosis factor superfamily cytokine production	2/254	81/17913	0.319197	0.676102	0.655713	2	943/23643	TNFRSF8/LY96
GO:0016482	cytosolic transport	3/254	140/17913	0.319238	0.676102	0.655713	3	22853/5605/7813	LMTK2/MAP2K2/EVI5
GO:0001835	blastocyst hatching	1/254	27/17913	0.320143	0.676102	0.655713	1	3054	HCFC1
GO:0001958	endochondral ossification	1/254	27/17913	0.320143	0.676102	0.655713	1	654	BMP6
GO:0002026	regulation of the force of heart contraction	1/254	27/17913	0.320143	0.676102	0.655713	1	493	ATP2B4
GO:0009261	ribonucleotide catabolic process	1/254	27/17913	0.320143	0.676102	0.655713	1	5142	PDE4B
GO:0015949	nucleobase-containing small molecule interconversion	1/254	27/17913	0.320143	0.676102	0.655713	1	4833	NME4
GO:0033137	negative regulation of peptidyl-serine phosphorylation	1/254	27/17913	0.320143	0.676102	0.655713	1	51763	INPP5K
GO:0035188	hatching	1/254	27/17913	0.320143	0.676102	0.655713	1	3054	HCFC1
GO:0035902	response to immobilization stress	1/254	27/17913	0.320143	0.676102	0.655713	1	51083	GAL
GO:0036075	replacement ossification	1/254	27/17913	0.320143	0.676102	0.655713	1	654	BMP6
GO:0036151	phosphatidylcholine acyl-chain remodeling	1/254	27/17913	0.320143	0.676102	0.655713	1	151056	PLB1
GO:0042226	interleukin-6 biosynthetic process	1/254	27/17913	0.320143	0.676102	0.655713	1	112744	IL17F
GO:0042745	circadian sleep/wake cycle	1/254	27/17913	0.320143	0.676102	0.655713	1	3062	HCRTR2
GO:0043921	modulation by host of viral transcription	1/254	27/17913	0.320143	0.676102	0.655713	1	51763	INPP5K
GO:0045907	positive regulation of vasoconstriction	1/254	27/17913	0.320143	0.676102	0.655713	1	3356	HTR2A
GO:0046854	phosphatidylinositol phosphorylation	1/254	27/17913	0.320143	0.676102	0.655713	1	5297	PI4KA
GO:0046885	regulation of hormone biosynthetic process	1/254	27/17913	0.320143	0.676102	0.655713	1	654	BMP6
GO:0050686	negative regulation of mRNA processing	1/254	27/17913	0.320143	0.676102	0.655713	1	580	BARD1
GO:0052472	modulation by host of symbiont transcription	1/254	27/17913	0.320143	0.676102	0.655713	1	51763	INPP5K
GO:0060122	inner ear receptor cell stereocilium organization	1/254	27/17913	0.320143	0.676102	0.655713	1	10083	USH1C
GO:0071684	organism emergence from protective structure	1/254	27/17913	0.320143	0.676102	0.655713	1	3054	HCFC1
GO:0072378	blood coagulation, fibrin clot formation	1/254	27/17913	0.320143	0.676102	0.655713	1	5547	PRCP
GO:2000191	regulation of fatty acid transport	1/254	27/17913	0.320143	0.676102	0.655713	1	5608	MAP2K6
GO:2001025	positive regulation of response to drug	1/254	27/17913	0.320143	0.676102	0.655713	1	51083	GAL
GO:0015980	energy derivation by oxidation of organic compounds	5/254	264/17913	0.320422	0.676227	0.655835	5	7915/51763/51422/63976/4724	ALDH5A1/INPP5K/PRKAG2/PRDM16/NDUFS4
GO:1902749	regulation of cell cycle G2/M phase transition	4/254	202/17913	0.32198	0.678334	0.657878	4	5890/23198/4869/5682	RAD51B/PSME4/NPM1/PSMA1
GO:0046470	phosphatidylcholine metabolic process	2/254	82/17913	0.324406	0.678334	0.657878	2	151056/1103	PLB1/CHAT
GO:0071158	positive regulation of cell cycle arrest	2/254	82/17913	0.324406	0.678334	0.657878	2	7709/1869	ZBTB17/E2F1
GO:1901992	positive regulation of mitotic cell cycle phase transition	2/254	82/17913	0.324406	0.678334	0.657878	2	5890/57521	RAD51B/RPTOR
GO:0072511	divalent inorganic cation transport	8/254	458/17913	0.324868	0.678334	0.657878	8	493/51763/7225/773/79054/55151/5142/3356	ATP2B4/INPP5K/TRPC6/CACNA1A/TRPM8/TMEM38B/PDE4B/HTR2A
GO:0045927	positive regulation of growth	5/254	266/17913	0.325997	0.678334	0.657878	5	375790/7049/9699/23499/57521	AGRN/TGFBR3/RIMS2/MACF1/RPTOR
GO:0071356	cellular response to tumor necrosis factor	5/254	266/17913	0.325997	0.678334	0.657878	5	51763/55914/23198/5682/943	INPP5K/ERBIN/PSME4/PSMA1/TNFRSF8
GO:0006006	glucose metabolic process	4/254	204/17913	0.328397	0.678334	0.657878	4	4041/7915/11188/51763	LRP5/ALDH5A1/NISCH/INPP5K
GO:0007596	blood coagulation	6/254	331/17913	0.32951	0.678334	0.657878	6	7409/7056/5890/5547/7225/3172	VAV1/THBD/RAD51B/PRCP/TRPC6/HNF4A
GO:0006112	energy reserve metabolic process	2/254	83/17913	0.329604	0.678334	0.657878	2	51763/51422	INPP5K/PRKAG2
GO:0006672	ceramide metabolic process	2/254	83/17913	0.329604	0.678334	0.657878	2	7915/8869	ALDH5A1/ST3GAL5
GO:0010507	negative regulation of autophagy	2/254	83/17913	0.329604	0.678334	0.657878	2	5768/54922	QSOX1/RASIP1
GO:0051492	regulation of stress fiber assembly	2/254	83/17913	0.329604	0.678334	0.657878	2	51763/10391	INPP5K/CORO2B
GO:0060218	hematopoietic stem cell differentiation	2/254	83/17913	0.329604	0.678334	0.657878	2	23198/5682	PSME4/PSMA1
GO:0001773	myeloid dendritic cell activation	1/254	28/17913	0.329798	0.678334	0.657878	1	6504	SLAMF1
GO:0001964	startle response	1/254	28/17913	0.329798	0.678334	0.657878	1	1496	CTNNA2
GO:0002717	positive regulation of natural killer cell mediated immunity	1/254	28/17913	0.329798	0.678334	0.657878	1	7409	VAV1
GO:0003180	aortic valve morphogenesis	1/254	28/17913	0.329798	0.678334	0.657878	1	6586	SLIT3
GO:0005979	regulation of glycogen biosynthetic process	1/254	28/17913	0.329798	0.678334	0.657878	1	51763	INPP5K
GO:0009074	aromatic amino acid family catabolic process	1/254	28/17913	0.329798	0.678334	0.657878	1	80150	ASRGL1
GO:0010882	regulation of cardiac muscle contraction by calcium ion signaling	1/254	28/17913	0.329798	0.678334	0.657878	1	55151	TMEM38B
GO:0010962	regulation of glucan biosynthetic process	1/254	28/17913	0.329798	0.678334	0.657878	1	51763	INPP5K
GO:0030511	positive regulation of transforming growth factor beta receptor signaling pathway	1/254	28/17913	0.329798	0.678334	0.657878	1	7049	TGFBR3
GO:0034367	protein-containing complex remodeling	1/254	28/17913	0.329798	0.678334	0.657878	1	4018	LPA
GO:0034368	protein-lipid complex remodeling	1/254	28/17913	0.329798	0.678334	0.657878	1	4018	LPA
GO:0034369	plasma lipoprotein particle remodeling	1/254	28/17913	0.329798	0.678334	0.657878	1	4018	LPA
GO:0042533	tumor necrosis factor biosynthetic process	1/254	28/17913	0.329798	0.678334	0.657878	1	943	TNFRSF8
GO:0042534	regulation of tumor necrosis factor biosynthetic process	1/254	28/17913	0.329798	0.678334	0.657878	1	943	TNFRSF8
GO:0042634	regulation of hair cycle	1/254	28/17913	0.329798	0.678334	0.657878	1	51083	GAL
GO:0044550	secondary metabolite biosynthetic process	1/254	28/17913	0.329798	0.678334	0.657878	1	7299	TYR
GO:0050855	regulation of B cell receptor signaling pathway	1/254	28/17913	0.329798	0.678334	0.657878	1	5079	PAX5
GO:0050974	detection of mechanical stimulus involved in sensory perception	1/254	28/17913	0.329798	0.678334	0.657878	1	3356	HTR2A
GO:0051294	establishment of spindle orientation	1/254	28/17913	0.329798	0.678334	0.657878	1	4134	MAP4
GO:0052312	modulation of transcription in other organism involved in symbiotic interaction	1/254	28/17913	0.329798	0.678334	0.657878	1	51763	INPP5K
GO:0061157	mRNA destabilization	1/254	28/17913	0.329798	0.678334	0.657878	1	131405	TRIM71
GO:0085029	extracellular matrix assembly	1/254	28/17913	0.329798	0.678334	0.657878	1	5768	QSOX1
GO:1902932	positive regulation of alcohol biosynthetic process	1/254	28/17913	0.329798	0.678334	0.657878	1	654	BMP6
GO:1903846	positive regulation of cellular response to transforming growth factor beta stimulus	1/254	28/17913	0.329798	0.678334	0.657878	1	7049	TGFBR3
GO:0008203	cholesterol metabolic process	3/254	143/17913	0.33088	0.678725	0.658258	3	64788/29881/2053	LMF1/NPC1L1/EPHX2
GO:0010970	transport along microtubule	3/254	143/17913	0.33088	0.678725	0.658258	3	1740/23059/5195	DLG2/CLUAP1/PEX14
GO:0099111	microtubule-based transport	3/254	143/17913	0.33088	0.678725	0.658258	3	1740/23059/5195	DLG2/CLUAP1/PEX14
GO:0007548	sex differentiation	5/254	269/17913	0.334378	0.678725	0.658258	5	654/2516/8648/3172/6586	BMP6/NR5A1/NCOA1/HNF4A/SLIT3
GO:0006633	fatty acid biosynthetic process	3/254	144/17913	0.33476	0.678725	0.658258	3	51422/84532/2053	PRKAG2/ACSS1/EPHX2
GO:0010212	response to ionizing radiation	3/254	144/17913	0.33476	0.678725	0.658258	3	7056/1785/64240	THBD/DNM2/ABCG5
GO:0035148	tube formation	3/254	144/17913	0.33476	0.678725	0.658258	3	57534/131405/5754	MIB1/TRIM71/PTK7
GO:0043271	negative regulation of ion transport	3/254	144/17913	0.33476	0.678725	0.658258	3	2048/51763/3356	EPHB2/INPP5K/HTR2A
GO:0006767	water-soluble vitamin metabolic process	2/254	84/17913	0.334792	0.678725	0.658258	2	440387/3141	CTRB2/HLCS
GO:0043470	regulation of carbohydrate catabolic process	2/254	84/17913	0.334792	0.678725	0.658258	2	51422/3356	PRKAG2/HTR2A
GO:1901379	regulation of potassium ion transmembrane transport	2/254	84/17913	0.334792	0.678725	0.658258	2	1785/51083	DNM2/GAL
GO:2001057	reactive nitrogen species metabolic process	2/254	84/17913	0.334792	0.678725	0.658258	2	493/1785	ATP2B4/DNM2
GO:0035567	non-canonical Wnt signaling pathway	3/254	145/17913	0.33864	0.678725	0.658258	3	23198/5754/5682	PSME4/PTK7/PSMA1
GO:0042133	neurotransmitter metabolic process	3/254	145/17913	0.33864	0.678725	0.658258	3	7915/493/1785	ALDH5A1/ATP2B4/DNM2
GO:0048592	eye morphogenesis	3/254	145/17913	0.33864	0.678725	0.658258	3	2048/4041/22882	EPHB2/LRP5/ZHX2
GO:0055002	striated muscle cell development	3/254	145/17913	0.33864	0.678725	0.658258	3	2318/11155/124857	FLNC/LDB3/WFIKKN2
GO:0060402	calcium ion transport into cytosol	3/254	145/17913	0.33864	0.678725	0.658258	3	493/55151/3356	ATP2B4/TMEM38B/HTR2A
GO:0000083	regulation of transcription involved in G1/S transition of mitotic cell cycle	1/254	29/17913	0.339316	0.678725	0.658258	1	1869	E2F1
GO:0001844	protein insertion into mitochondrial membrane involved in apoptotic signaling pathway	1/254	29/17913	0.339316	0.678725	0.658258	1	1869	E2F1
GO:0006929	substrate-dependent cell migration	1/254	29/17913	0.339316	0.678725	0.658258	1	2017	CTTN
GO:0010737	protein kinase A signaling	1/254	29/17913	0.339316	0.678725	0.658258	1	51083	GAL
GO:0021602	cranial nerve morphogenesis	1/254	29/17913	0.339316	0.678725	0.658258	1	2048	EPHB2
GO:0030970	retrograde protein transport, ER to cytosol	1/254	29/17913	0.339316	0.678725	0.658258	1	337867	UBAC2
GO:0033006	regulation of mast cell activation involved in immune response	1/254	29/17913	0.339316	0.678725	0.658258	1	5169	ENPP3
GO:0035666	TRIF-dependent toll-like receptor signaling pathway	1/254	29/17913	0.339316	0.678725	0.658258	1	23643	LY96
GO:0042491	inner ear auditory receptor cell differentiation	1/254	29/17913	0.339316	0.678725	0.658258	1	10083	USH1C
GO:0043457	regulation of cellular respiration	1/254	29/17913	0.339316	0.678725	0.658258	1	63976	PRDM16
GO:0045940	positive regulation of steroid metabolic process	1/254	29/17913	0.339316	0.678725	0.658258	1	654	BMP6
GO:0046039	GTP metabolic process	1/254	29/17913	0.339316	0.678725	0.658258	1	4833	NME4
GO:0046134	pyrimidine nucleoside biosynthetic process	1/254	29/17913	0.339316	0.678725	0.658258	1	4833	NME4
GO:0046627	negative regulation of insulin receptor signaling pathway	1/254	29/17913	0.339316	0.678725	0.658258	1	51763	INPP5K
GO:0070536	protein K63-linked deubiquitination	1/254	29/17913	0.339316	0.678725	0.658258	1	9101	USP8
GO:0071549	cellular response to dexamethasone stimulus	1/254	29/17913	0.339316	0.678725	0.658258	1	9101	USP8
GO:0072606	interleukin-8 secretion	1/254	29/17913	0.339316	0.678725	0.658258	1	2219	FCN1
GO:0090162	establishment of epithelial cell polarity	1/254	29/17913	0.339316	0.678725	0.658258	1	5754	PTK7
GO:1903513	endoplasmic reticulum to cytosol transport	1/254	29/17913	0.339316	0.678725	0.658258	1	337867	UBAC2
GO:1904292	regulation of ERAD pathway	1/254	29/17913	0.339316	0.678725	0.658258	1	337867	UBAC2
GO:0001942	hair follicle development	2/254	85/17913	0.339968	0.678725	0.658258	2	147495/51083	APCDD1/GAL
GO:0010972	negative regulation of G2/M transition of mitotic cell cycle	2/254	85/17913	0.339968	0.678725	0.658258	2	23198/5682	PSME4/PSMA1
GO:0045185	maintenance of protein location	2/254	85/17913	0.339968	0.678725	0.658258	2	580/2516	BARD1/NR5A1
GO:0048704	embryonic skeletal system morphogenesis	2/254	85/17913	0.339968	0.678725	0.658258	2	5079/3203	PAX5/HOXA6
GO:0070542	response to fatty acid	2/254	85/17913	0.339968	0.678725	0.658258	2	1869/7049	E2F1/TGFBR3
GO:1901532	regulation of hematopoietic progenitor cell differentiation	2/254	85/17913	0.339968	0.678725	0.658258	2	23198/5682	PSME4/PSMA1
GO:1903901	negative regulation of viral life cycle	2/254	85/17913	0.339968	0.678725	0.658258	2	2219/51763	FCN1/INPP5K
GO:0007599	hemostasis	6/254	336/17913	0.34205	0.678725	0.658258	6	7409/7056/5890/5547/7225/3172	VAV1/THBD/RAD51B/PRCP/TRPC6/HNF4A
GO:0016331	morphogenesis of embryonic epithelium	3/254	146/17913	0.342517	0.678725	0.658258	3	57534/131405/5754	MIB1/TRIM71/PTK7
GO:0016236	macroautophagy	5/254	272/17913	0.342779	0.678725	0.658258	5	9146/5768/51422/83734/57521	HGS/QSOX1/PRKAG2/ATG10/RPTOR
GO:0050817	coagulation	6/254	337/17913	0.344565	0.678725	0.658258	6	7409/7056/5890/5547/7225/3172	VAV1/THBD/RAD51B/PRCP/TRPC6/HNF4A
GO:0006644	phospholipid metabolic process	7/254	402/17913	0.344741	0.678725	0.658258	7	5297/7915/51763/151056/55151/1103/3356	PI4KA/ALDH5A1/INPP5K/PLB1/TMEM38B/CHAT/HTR2A
GO:0001843	neural tube closure	2/254	86/17913	0.345131	0.678725	0.658258	2	131405/5754	TRIM71/PTK7
GO:0048145	regulation of fibroblast proliferation	2/254	86/17913	0.345131	0.678725	0.658258	2	1869/4724	E2F1/NDUFS4
GO:1903321	negative regulation of protein modification by small protein conjugation or removal	2/254	86/17913	0.345131	0.678725	0.658258	2	10459/575	MAD2L2/ADGRB1
GO:2000177	regulation of neural precursor cell proliferation	2/254	86/17913	0.345131	0.678725	0.658258	2	131405/23440	TRIM71/OTP
GO:0006090	pyruvate metabolic process	3/254	147/17913	0.346394	0.678725	0.658258	3	51422/9123/3356	PRKAG2/SLC16A3/HTR2A
GO:1902652	secondary alcohol metabolic process	3/254	147/17913	0.346394	0.678725	0.658258	3	64788/29881/2053	LMF1/NPC1L1/EPHX2
GO:0006402	mRNA catabolic process	6/254	338/17913	0.347081	0.678725	0.658258	6	131405/1869/23198/4869/5682/22882	TRIM71/E2F1/PSME4/NPM1/PSMA1/ZHX2
GO:0010951	negative regulation of endopeptidase activity	4/254	210/17913	0.347687	0.678725	0.658258	4	3697/4018/59082/124857	ITIH1/LPA/CARD18/WFIKKN2
GO:0071456	cellular response to hypoxia	4/254	210/17913	0.347687	0.678725	0.658258	4	1869/23198/7225/5682	E2F1/PSME4/TRPC6/PSMA1
GO:0007094	mitotic spindle assembly checkpoint	1/254	30/17913	0.348699	0.678725	0.658258	1	10459	MAD2L2
GO:0010543	regulation of platelet activation	1/254	30/17913	0.348699	0.678725	0.658258	1	7056	THBD
GO:0010586	miRNA metabolic process	1/254	30/17913	0.348699	0.678725	0.658258	1	131405	TRIM71
GO:0019098	reproductive behavior	1/254	30/17913	0.348699	0.678725	0.658258	1	8648	NCOA1
GO:0031577	spindle checkpoint	1/254	30/17913	0.348699	0.678725	0.658258	1	10459	MAD2L2
GO:0032743	positive regulation of interleukin-2 production	1/254	30/17913	0.348699	0.678725	0.658258	1	5142	PDE4B
GO:0034694	response to prostaglandin	1/254	30/17913	0.348699	0.678725	0.658258	1	7049	TGFBR3
GO:0036258	multivesicular body assembly	1/254	30/17913	0.348699	0.678725	0.658258	1	9146	HGS
GO:0046320	regulation of fatty acid oxidation	1/254	30/17913	0.348699	0.678725	0.658258	1	51422	PRKAG2
GO:0046596	regulation of viral entry into host cell	1/254	30/17913	0.348699	0.678725	0.658258	1	2219	FCN1
GO:0050690	regulation of defense response to virus by virus	1/254	30/17913	0.348699	0.678725	0.658258	1	3055	HCK
GO:0050779	RNA destabilization	1/254	30/17913	0.348699	0.678725	0.658258	1	131405	TRIM71
GO:0051194	positive regulation of cofactor metabolic process	1/254	30/17913	0.348699	0.678725	0.658258	1	3356	HTR2A
GO:0065005	protein-lipid complex assembly	1/254	30/17913	0.348699	0.678725	0.658258	1	5326	PLAGL2
GO:0070050	neuron cellular homeostasis	1/254	30/17913	0.348699	0.678725	0.658258	1	55277	FGGY
GO:0071108	protein K48-linked deubiquitination	1/254	30/17913	0.348699	0.678725	0.658258	1	9101	USP8
GO:0071173	spindle assembly checkpoint	1/254	30/17913	0.348699	0.678725	0.658258	1	10459	MAD2L2
GO:0071174	mitotic spindle checkpoint	1/254	30/17913	0.348699	0.678725	0.658258	1	10459	MAD2L2
GO:0090075	relaxation of muscle	1/254	30/17913	0.348699	0.678725	0.658258	1	5142	PDE4B
GO:1900181	negative regulation of protein localization to nucleus	1/254	30/17913	0.348699	0.678725	0.658258	1	25885	POLR1A
GO:1905476	negative regulation of protein localization to membrane	1/254	30/17913	0.348699	0.678725	0.658258	1	51763	INPP5K
GO:2000780	negative regulation of double-strand break repair	1/254	30/17913	0.348699	0.678725	0.658258	1	10459	MAD2L2
GO:2000781	positive regulation of double-strand break repair	1/254	30/17913	0.348699	0.678725	0.658258	1	10459	MAD2L2
GO:0044282	small molecule catabolic process	7/254	404/17913	0.349345	0.678725	0.658258	7	4041/7915/493/51763/80150/339896/25953	LRP5/ALDH5A1/ATP2B4/INPP5K/ASRGL1/GADL1/PNKD
GO:0008277	regulation of G protein-coupled receptor signaling pathway	3/254	148/17913	0.350268	0.678725	0.658258	3	493/1785/115727	ATP2B4/DNM2/RASGRP4
GO:0008643	carbohydrate transport	3/254	148/17913	0.350268	0.678725	0.658258	3	51763/51422/57210	INPP5K/PRKAG2/SLC45A4
GO:0001892	embryonic placenta development	2/254	87/17913	0.350281	0.678725	0.658258	2	1045/8648	CDX2/NCOA1
GO:0022404	molting cycle process	2/254	87/17913	0.350281	0.678725	0.658258	2	147495/51083	APCDD1/GAL
GO:0022405	hair cycle process	2/254	87/17913	0.350281	0.678725	0.658258	2	147495/51083	APCDD1/GAL
GO:0043648	dicarboxylic acid metabolic process	2/254	87/17913	0.350281	0.678725	0.658258	2	7915/85300	ALDH5A1/ATCAY
GO:0048144	fibroblast proliferation	2/254	87/17913	0.350281	0.678725	0.658258	2	1869/4724	E2F1/NDUFS4
GO:0060606	tube closure	2/254	87/17913	0.350281	0.678725	0.658258	2	131405/5754	TRIM71/PTK7
GO:0098773	skin epidermis development	2/254	87/17913	0.350281	0.678725	0.658258	2	147495/51083	APCDD1/GAL
GO:1903035	negative regulation of response to wounding	2/254	87/17913	0.350281	0.678725	0.658258	2	7056/146760	THBD/RTN4RL1
GO:0006914	autophagy	8/254	471/17913	0.352497	0.680835	0.660304	8	55255/9146/5768/51422/54922/83734/2017/57521	WDR41/HGS/QSOX1/PRKAG2/RASIP1/ATG10/CTTN/RPTOR
GO:0061919	process utilizing autophagic mechanism	8/254	471/17913	0.352497	0.680835	0.660304	8	55255/9146/5768/51422/54922/83734/2017/57521	WDR41/HGS/QSOX1/PRKAG2/RASIP1/ATG10/CTTN/RPTOR
GO:0043583	ear development	4/254	212/17913	0.354124	0.680835	0.660304	4	2048/10083/341640/5754	EPHB2/USH1C/FREM2/PTK7
GO:0032635	interleukin-6 production	3/254	149/17913	0.354139	0.680835	0.660304	3	6504/84818/112744	SLAMF1/IL17RC/IL17F
GO:0009791	post-embryonic development	2/254	88/17913	0.355418	0.680835	0.660304	2	7915/5326	ALDH5A1/PLAGL2
GO:0044264	cellular polysaccharide metabolic process	2/254	88/17913	0.355418	0.680835	0.660304	2	51763/51422	INPP5K/PRKAG2
GO:0005996	monosaccharide metabolic process	5/254	277/17913	0.356812	0.680835	0.660304	5	4041/7915/11188/51763/55277	LRP5/ALDH5A1/NISCH/INPP5K/FGGY
GO:0034330	cell junction organization	5/254	277/17913	0.356812	0.680835	0.660304	5	2318/10391/2017/3801/23499	FLNC/CORO2B/CTTN/KIFC3/MACF1
GO:0001654	eye development	6/254	342/17913	0.357162	0.680835	0.660304	6	2048/4041/493/341640/654/22882	EPHB2/LRP5/ATP2B4/FREM2/BMP6/ZHX2
GO:0046474	glycerophospholipid biosynthetic process	4/254	213/17913	0.357343	0.680835	0.660304	4	5297/51763/1103/3356	PI4KA/INPP5K/CHAT/HTR2A
GO:0050953	sensory perception of light stimulus	4/254	213/17913	0.357343	0.680835	0.660304	4	10083/3801/94137/7299	USH1C/KIFC3/RP1L1/TYR
GO:0003382	epithelial cell morphogenesis	1/254	31/17913	0.35795	0.680835	0.660304	1	57111	RAB25
GO:0007099	centriole replication	1/254	31/17913	0.35795	0.680835	0.660304	1	4869	NPM1
GO:0010765	positive regulation of sodium ion transport	1/254	31/17913	0.35795	0.680835	0.660304	1	1785	DNM2
GO:0010880	regulation of release of sequestered calcium ion into cytosol by sarcoplasmic reticulum	1/254	31/17913	0.35795	0.680835	0.660304	1	55151	TMEM38B
GO:0015872	dopamine transport	1/254	31/17913	0.35795	0.680835	0.660304	1	3356	HTR2A
GO:0018198	peptidyl-cysteine modification	1/254	31/17913	0.35795	0.680835	0.660304	1	493	ATP2B4
GO:0018279	protein N-linked glycosylation via asparagine	1/254	31/17913	0.35795	0.680835	0.660304	1	433	ASGR2
GO:0030431	sleep	1/254	31/17913	0.35795	0.680835	0.660304	1	3356	HTR2A
GO:0030513	positive regulation of BMP signaling pathway	1/254	31/17913	0.35795	0.680835	0.660304	1	23090	ZNF423
GO:0036257	multivesicular body organization	1/254	31/17913	0.35795	0.680835	0.660304	1	9146	HGS
GO:0042572	retinol metabolic process	1/254	31/17913	0.35795	0.680835	0.660304	1	151056	PLB1
GO:0045910	negative regulation of DNA recombination	1/254	31/17913	0.35795	0.680835	0.660304	1	10459	MAD2L2
GO:0045987	positive regulation of smooth muscle contraction	1/254	31/17913	0.35795	0.680835	0.660304	1	2017	CTTN
GO:0051204	protein insertion into mitochondrial membrane	1/254	31/17913	0.35795	0.680835	0.660304	1	1869	E2F1
GO:0061036	positive regulation of cartilage development	1/254	31/17913	0.35795	0.680835	0.660304	1	654	BMP6
GO:1900077	negative regulation of cellular response to insulin stimulus	1/254	31/17913	0.35795	0.680835	0.660304	1	51763	INPP5K
GO:1902692	regulation of neuroblast proliferation	1/254	31/17913	0.35795	0.680835	0.660304	1	23440	OTP
GO:1904893	negative regulation of STAT cascade	1/254	31/17913	0.35795	0.680835	0.660304	1	9146	HGS
GO:0007088	regulation of mitotic nuclear division	3/254	150/17913	0.358008	0.680835	0.660304	3	4041/10459/57520	LRP5/MAD2L2/HECW2
GO:0000726	non-recombinational repair	2/254	89/17913	0.36054	0.684421	0.663782	2	10459/580	MAD2L2/BARD1
GO:0009119	ribonucleoside metabolic process	2/254	89/17913	0.36054	0.684421	0.663782	2	4833/1740	NME4/DLG2
GO:0034329	cell junction assembly	4/254	214/17913	0.360561	0.684421	0.663782	4	2318/10391/2017/23499	FLNC/CORO2B/CTTN/MACF1
GO:0051047	positive regulation of secretion	7/254	409/17913	0.360883	0.684609	0.663964	7	2219/9146/654/5608/51083/84818/112744	FCN1/HGS/BMP6/MAP2K6/GAL/IL17RC/IL17F
GO:0032680	regulation of tumor necrosis factor production	3/254	151/17913	0.361874	0.684893	0.664239	3	6504/943/23643	SLAMF1/TNFRSF8/LY96
GO:0042445	hormone metabolic process	4/254	215/17913	0.363779	0.684893	0.664239	4	654/151056/51083/2516	BMP6/PLB1/GAL/NR5A1
GO:0015672	monovalent inorganic cation transport	8/254	477/17913	0.365352	0.684893	0.664239	8	493/3763/55151/1785/51083/7402/3739/3356	ATP2B4/KCNJ6/TMEM38B/DNM2/GAL/UTRN/KCNA4/HTR2A
GO:0050764	regulation of phagocytosis	2/254	90/17913	0.365647	0.684893	0.664239	2	3055/1785	HCK/DNM2
GO:0051196	regulation of coenzyme metabolic process	2/254	90/17913	0.365647	0.684893	0.664239	2	51422/3356	PRKAG2/HTR2A
GO:0060349	bone morphogenesis	2/254	90/17913	0.365647	0.684893	0.664239	2	4041/654	LRP5/BMP6
GO:2001169	regulation of ATP biosynthetic process	2/254	90/17913	0.365647	0.684893	0.664239	2	51422/3356	PRKAG2/HTR2A
GO:0030168	platelet activation	3/254	152/17913	0.365736	0.684893	0.664239	3	7409/7056/7225	VAV1/THBD/TRPC6
GO:0001881	receptor recycling	1/254	32/17913	0.36707	0.684893	0.664239	1	22853	LMTK2
GO:0003176	aortic valve development	1/254	32/17913	0.36707	0.684893	0.664239	1	6586	SLIT3
GO:0003299	muscle hypertrophy in response to stress	1/254	32/17913	0.36707	0.684893	0.664239	1	493	ATP2B4
GO:0014887	cardiac muscle adaptation	1/254	32/17913	0.36707	0.684893	0.664239	1	493	ATP2B4
GO:0014898	cardiac muscle hypertrophy in response to stress	1/254	32/17913	0.36707	0.684893	0.664239	1	493	ATP2B4
GO:0015804	neutral amino acid transport	1/254	32/17913	0.36707	0.684893	0.664239	1	153201	SLC36A2
GO:0018196	peptidyl-asparagine modification	1/254	32/17913	0.36707	0.684893	0.664239	1	433	ASGR2
GO:0032228	regulation of synaptic transmission, GABAergic	1/254	32/17913	0.36707	0.684893	0.664239	1	11188	NISCH
GO:0038128	ERBB2 signaling pathway	1/254	32/17913	0.36707	0.684893	0.664239	1	55914	ERBIN
GO:0043001	Golgi to plasma membrane protein transport	1/254	32/17913	0.36707	0.684893	0.664239	1	23499	MACF1
GO:0045738	negative regulation of DNA repair	1/254	32/17913	0.36707	0.684893	0.664239	1	10459	MAD2L2
GO:0045841	negative regulation of mitotic metaphase/anaphase transition	1/254	32/17913	0.36707	0.684893	0.664239	1	10459	MAD2L2
GO:0051693	actin filament capping	1/254	32/17913	0.36707	0.684893	0.664239	1	57482	KIAA1211
GO:0060317	cardiac epithelial to mesenchymal transition	1/254	32/17913	0.36707	0.684893	0.664239	1	7049	TGFBR3
GO:0061384	heart trabecula morphogenesis	1/254	32/17913	0.36707	0.684893	0.664239	1	7049	TGFBR3
GO:0061462	protein localization to lysosome	1/254	32/17913	0.36707	0.684893	0.664239	1	9146	HGS
GO:0070207	protein homotrimerization	1/254	32/17913	0.36707	0.684893	0.664239	1	79054	TRPM8
GO:2000816	negative regulation of mitotic sister chromatid separation	1/254	32/17913	0.36707	0.684893	0.664239	1	10459	MAD2L2
GO:2001171	positive regulation of ATP biosynthetic process	1/254	32/17913	0.36707	0.684893	0.664239	1	3356	HTR2A
GO:0150063	visual system development	6/254	346/17913	0.367265	0.684893	0.664239	6	2048/4041/493/341640/654/22882	EPHB2/LRP5/ATP2B4/FREM2/BMP6/ZHX2
GO:0031497	chromatin assembly	3/254	153/17913	0.369595	0.688821	0.668049	3	4869/22893/7290	NPM1/BAHD1/HIRA
GO:0002708	positive regulation of lymphocyte mediated immunity	2/254	91/17913	0.370739	0.689699	0.668901	2	7409/10459	VAV1/MAD2L2
GO:0017158	regulation of calcium ion-dependent exocytosis	2/254	91/17913	0.370739	0.689699	0.668901	2	10815/3356	CPLX1/HTR2A
GO:0030148	sphingolipid biosynthetic process	2/254	91/17913	0.370739	0.689699	0.668901	2	8869/29906	ST3GAL5/ST8SIA5
GO:0030705	cytoskeleton-dependent intracellular transport	3/254	154/17913	0.373449	0.690829	0.669996	3	1740/23059/5195	DLG2/CLUAP1/PEX14
GO:0031214	biomineral tissue development	3/254	154/17913	0.373449	0.690829	0.669996	3	654/55151/433	BMP6/TMEM38B/ASGR2
GO:0045931	positive regulation of mitotic cell cycle	3/254	154/17913	0.373449	0.690829	0.669996	3	4041/5890/57521	LRP5/RAD51B/RPTOR
GO:0014020	primary neural tube formation	2/254	92/17913	0.375814	0.690829	0.669996	2	131405/5754	TRIM71/PTK7
GO:0002756	MyD88-independent toll-like receptor signaling pathway	1/254	33/17913	0.376061	0.690829	0.669996	1	23643	LY96
GO:0006084	acetyl-CoA metabolic process	1/254	33/17913	0.376061	0.690829	0.669996	1	84532	ACSS1
GO:0006370	7-methylguanosine mRNA capping	1/254	33/17913	0.376061	0.690829	0.669996	1	5435	POLR2F
GO:0007340	acrosome reaction	1/254	33/17913	0.376061	0.690829	0.669996	1	151056	PLB1
GO:0010039	response to iron ion	1/254	33/17913	0.376061	0.690829	0.669996	1	654	BMP6
GO:0010922	positive regulation of phosphatase activity	1/254	33/17913	0.376061	0.690829	0.669996	1	133522	PPARGC1B
GO:0016242	negative regulation of macroautophagy	1/254	33/17913	0.376061	0.690829	0.669996	1	5768	QSOX1
GO:0030947	regulation of vascular endothelial growth factor receptor signaling pathway	1/254	33/17913	0.376061	0.690829	0.669996	1	9146	HGS
GO:0032892	positive regulation of organic acid transport	1/254	33/17913	0.376061	0.690829	0.669996	1	5608	MAP2K6
GO:0042455	ribonucleoside biosynthetic process	1/254	33/17913	0.376061	0.690829	0.669996	1	4833	NME4
GO:0045191	regulation of isotype switching	1/254	33/17913	0.376061	0.690829	0.669996	1	10459	MAD2L2
GO:0048665	neuron fate specification	1/254	33/17913	0.376061	0.690829	0.669996	1	23040	MYT1L
GO:0070873	regulation of glycogen metabolic process	1/254	33/17913	0.376061	0.690829	0.669996	1	51763	INPP5K
GO:0098664	G protein-coupled serotonin receptor signaling pathway	1/254	33/17913	0.376061	0.690829	0.669996	1	3356	HTR2A
GO:1902100	negative regulation of metaphase/anaphase transition of cell cycle	1/254	33/17913	0.376061	0.690829	0.669996	1	10459	MAD2L2
GO:1902742	apoptotic process involved in development	1/254	33/17913	0.376061	0.690829	0.669996	1	6586	SLIT3
GO:1905819	negative regulation of chromosome separation	1/254	33/17913	0.376061	0.690829	0.669996	1	10459	MAD2L2
GO:0034612	response to tumor necrosis factor	5/254	284/17913	0.376492	0.691209	0.670365	5	51763/55914/23198/5682/943	INPP5K/ERBIN/PSME4/PSMA1/TNFRSF8
GO:0021915	neural tube development	3/254	155/17913	0.377299	0.691453	0.670601	3	57534/131405/5754	MIB1/TRIM71/PTK7
GO:0032640	tumor necrosis factor production	3/254	155/17913	0.377299	0.691453	0.670601	3	6504/943/23643	SLAMF1/TNFRSF8/LY96
GO:1903555	regulation of tumor necrosis factor superfamily cytokine production	3/254	155/17913	0.377299	0.691453	0.670601	3	6504/943/23643	SLAMF1/TNFRSF8/LY96
GO:0036294	cellular response to decreased oxygen levels	4/254	220/17913	0.379857	0.692394	0.671514	4	1869/23198/7225/5682	E2F1/PSME4/TRPC6/PSMA1
GO:0048880	sensory system development	6/254	351/17913	0.379911	0.692394	0.671514	6	2048/4041/493/341640/654/22882	EPHB2/LRP5/ATP2B4/FREM2/BMP6/ZHX2
GO:0035282	segmentation	2/254	93/17913	0.380872	0.692394	0.671514	2	57534/1045	MIB1/CDX2
GO:0048010	vascular endothelial growth factor receptor signaling pathway	2/254	93/17913	0.380872	0.692394	0.671514	2	9146/7409	HGS/VAV1
GO:0051983	regulation of chromosome segregation	2/254	93/17913	0.380872	0.692394	0.671514	2	10459/57520	MAD2L2/HECW2
GO:1903076	regulation of protein localization to plasma membrane	2/254	93/17913	0.380872	0.692394	0.671514	2	3675/2048	ITGA3/EPHB2
GO:0006338	chromatin remodeling	3/254	156/17913	0.381144	0.692394	0.671514	3	23198/4869/22893	PSME4/NPM1/BAHD1
GO:0000959	mitochondrial RNA metabolic process	1/254	34/17913	0.384924	0.692394	0.671514	1	133522	PPARGC1B
GO:0007019	microtubule depolymerization	1/254	34/17913	0.384924	0.692394	0.671514	1	57701	NCKAP5L
GO:0007131	reciprocal meiotic recombination	1/254	34/17913	0.384924	0.692394	0.671514	1	5890	RAD51B
GO:0009452	7-methylguanosine RNA capping	1/254	34/17913	0.384924	0.692394	0.671514	1	5435	POLR2F
GO:0010259	multicellular organism aging	1/254	34/17913	0.384924	0.692394	0.671514	1	2516	NR5A1
GO:0010464	regulation of mesenchymal cell proliferation	1/254	34/17913	0.384924	0.692394	0.671514	1	4041	LRP5
GO:0032691	negative regulation of interleukin-1 beta production	1/254	34/17913	0.384924	0.692394	0.671514	1	59082	CARD18
GO:0034142	toll-like receptor 4 signaling pathway	1/254	34/17913	0.384924	0.692394	0.671514	1	23643	LY96
GO:0036260	RNA capping	1/254	34/17913	0.384924	0.692394	0.671514	1	5435	POLR2F
GO:0043276	anoikis	1/254	34/17913	0.384924	0.692394	0.671514	1	1869	E2F1
GO:0045730	respiratory burst	1/254	34/17913	0.384924	0.692394	0.671514	1	3055	HCK
GO:0050849	negative regulation of calcium-mediated signaling	1/254	34/17913	0.384924	0.692394	0.671514	1	493	ATP2B4
GO:0060428	lung epithelium development	1/254	34/17913	0.384924	0.692394	0.671514	1	55151	TMEM38B
GO:0060795	cell fate commitment involved in formation of primary germ layer	1/254	34/17913	0.384924	0.692394	0.671514	1	2139	EYA2
GO:0097009	energy homeostasis	1/254	34/17913	0.384924	0.692394	0.671514	1	5547	PRCP
GO:0097484	dendrite extension	1/254	34/17913	0.384924	0.692394	0.671514	1	9699	RIMS2
GO:0098901	regulation of cardiac muscle cell action potential	1/254	34/17913	0.384924	0.692394	0.671514	1	29119	CTNNA3
GO:1901030	positive regulation of mitochondrial outer membrane permeabilization involved in apoptotic signaling pathway	1/254	34/17913	0.384924	0.692394	0.671514	1	1869	E2F1
GO:1901385	regulation of voltage-gated calcium channel activity	1/254	34/17913	0.384924	0.692394	0.671514	1	5142	PDE4B
GO:2000249	regulation of actin cytoskeleton reorganization	1/254	34/17913	0.384924	0.692394	0.671514	1	3055	HCK
GO:2001038	regulation of cellular response to drug	1/254	34/17913	0.384924	0.692394	0.671514	1	8648	NCOA1
GO:0090150	establishment of protein localization to membrane	5/254	287/17913	0.384928	0.692394	0.671514	5	51763/1869/65055/10815/23499	INPP5K/E2F1/REEP1/CPLX1/MACF1
GO:0060401	cytosolic calcium ion transport	3/254	157/17913	0.384984	0.692394	0.671514	3	493/55151/3356	ATP2B4/TMEM38B/HTR2A
GO:0001676	long-chain fatty acid metabolic process	2/254	94/17913	0.385913	0.692394	0.671514	2	28965/2053	SLC27A6/EPHX2
GO:0002821	positive regulation of adaptive immune response	2/254	94/17913	0.385913	0.692394	0.671514	2	10459/8631	MAD2L2/SKAP1
GO:0007041	lysosomal transport	2/254	94/17913	0.385913	0.692394	0.671514	2	9146/1045	HGS/CDX2
GO:0015748	organophosphate ester transport	2/254	94/17913	0.385913	0.692394	0.671514	2	26154/64241	ABCA12/ABCG8
GO:0045778	positive regulation of ossification	2/254	94/17913	0.385913	0.692394	0.671514	2	4041/654	LRP5/BMP6
GO:0110020	regulation of actomyosin structure organization	2/254	94/17913	0.385913	0.692394	0.671514	2	51763/10391	INPP5K/CORO2B
GO:0010466	negative regulation of peptidase activity	4/254	223/17913	0.389487	0.697351	0.676322	4	3697/4018/59082/124857	ITIH1/LPA/CARD18/WFIKKN2
GO:0008585	female gonad development	2/254	95/17913	0.390937	0.697351	0.676322	2	2516/6586	NR5A1/SLIT3
GO:0033273	response to vitamin	2/254	95/17913	0.390937	0.697351	0.676322	2	3141/7299	HLCS/TYR
GO:0050810	regulation of steroid biosynthetic process	2/254	95/17913	0.390937	0.697351	0.676322	2	654/2516	BMP6/NR5A1
GO:0060079	excitatory postsynaptic potential	2/254	95/17913	0.390937	0.697351	0.676322	2	9699/85358	RIMS2/SHANK3
GO:0072527	pyrimidine-containing compound metabolic process	2/254	95/17913	0.390937	0.697351	0.676322	2	4833/5169	NME4/ENPP3
GO:0009206	purine ribonucleoside triphosphate biosynthetic process	3/254	159/17913	0.392647	0.697351	0.676322	3	4833/51422/3356	NME4/PRKAG2/HTR2A
GO:0046488	phosphatidylinositol metabolic process	3/254	159/17913	0.392647	0.697351	0.676322	3	5297/51763/3356	PI4KA/INPP5K/HTR2A
GO:0050954	sensory perception of mechanical stimulus	3/254	159/17913	0.392647	0.697351	0.676322	3	9381/10083/3356	OTOF/USH1C/HTR2A
GO:0055001	muscle cell development	3/254	159/17913	0.392647	0.697351	0.676322	3	2318/11155/124857	FLNC/LDB3/WFIKKN2
GO:0010831	positive regulation of myotube differentiation	1/254	35/17913	0.393662	0.697351	0.676322	1	575	ADGRB1
GO:0014808	release of sequestered calcium ion into cytosol by sarcoplasmic reticulum	1/254	35/17913	0.393662	0.697351	0.676322	1	55151	TMEM38B
GO:0030835	negative regulation of actin filament depolymerization	1/254	35/17913	0.393662	0.697351	0.676322	1	57482	KIAA1211
GO:0033048	negative regulation of mitotic sister chromatid segregation	1/254	35/17913	0.393662	0.697351	0.676322	1	10459	MAD2L2
GO:0035825	homologous recombination	1/254	35/17913	0.393662	0.697351	0.676322	1	5890	RAD51B
GO:0046131	pyrimidine ribonucleoside metabolic process	1/254	35/17913	0.393662	0.697351	0.676322	1	4833	NME4
GO:0048246	macrophage chemotaxis	1/254	35/17913	0.393662	0.697351	0.676322	1	79647	AKIRIN1
GO:0051354	negative regulation of oxidoreductase activity	1/254	35/17913	0.393662	0.697351	0.676322	1	493	ATP2B4
GO:0065002	intracellular protein transmembrane transport	1/254	35/17913	0.393662	0.697351	0.676322	1	5195	PEX14
GO:0071312	cellular response to alkaloid	1/254	35/17913	0.393662	0.697351	0.676322	1	55151	TMEM38B
GO:0098534	centriole assembly	1/254	35/17913	0.393662	0.697351	0.676322	1	4869	NPM1
GO:1901998	toxin transport	1/254	35/17913	0.393662	0.697351	0.676322	1	4041	LRP5
GO:0018958	phenol-containing compound metabolic process	2/254	96/17913	0.395942	0.700116	0.679004	2	25953/7299	PNKD/TYR
GO:0009145	purine nucleoside triphosphate biosynthetic process	3/254	160/17913	0.39647	0.700116	0.679004	3	4833/51422/3356	NME4/PRKAG2/HTR2A
GO:0046661	male sex differentiation	3/254	160/17913	0.39647	0.700116	0.679004	3	654/2516/8648	BMP6/NR5A1/NCOA1
GO:1903522	regulation of blood circulation	5/254	292/17913	0.398975	0.700116	0.679004	5	493/55151/29119/5142/3356	ATP2B4/TMEM38B/CTNNA3/PDE4B/HTR2A
GO:0030038	contractile actin filament bundle assembly	2/254	97/17913	0.400928	0.700116	0.679004	2	51763/10391	INPP5K/CORO2B
GO:0043149	stress fiber assembly	2/254	97/17913	0.400928	0.700116	0.679004	2	51763/10391	INPP5K/CORO2B
GO:1902750	negative regulation of cell cycle G2/M phase transition	2/254	97/17913	0.400928	0.700116	0.679004	2	23198/5682	PSME4/PSMA1
GO:0002755	MyD88-dependent toll-like receptor signaling pathway	1/254	36/17913	0.402277	0.700116	0.679004	1	23643	LY96
GO:0006007	glucose catabolic process	1/254	36/17913	0.402277	0.700116	0.679004	1	4041	LRP5
GO:0006699	bile acid biosynthetic process	1/254	36/17913	0.402277	0.700116	0.679004	1	114883	OSBPL9
GO:0008038	neuron recognition	1/254	36/17913	0.402277	0.700116	0.679004	1	2048	EPHB2
GO:0009187	cyclic nucleotide metabolic process	1/254	36/17913	0.402277	0.700116	0.679004	1	5142	PDE4B
GO:0010453	regulation of cell fate commitment	1/254	36/17913	0.402277	0.700116	0.679004	1	148979	GLIS1
GO:0032885	regulation of polysaccharide biosynthetic process	1/254	36/17913	0.402277	0.700116	0.679004	1	51763	INPP5K
GO:0034390	smooth muscle cell apoptotic process	1/254	36/17913	0.402277	0.700116	0.679004	1	1871	E2F3
GO:0034391	regulation of smooth muscle cell apoptotic process	1/254	36/17913	0.402277	0.700116	0.679004	1	1871	E2F3
GO:0042417	dopamine metabolic process	1/254	36/17913	0.402277	0.700116	0.679004	1	25953	PNKD
GO:0043243	positive regulation of protein complex disassembly	1/254	36/17913	0.402277	0.700116	0.679004	1	57482	KIAA1211
GO:0045911	positive regulation of DNA recombination	1/254	36/17913	0.402277	0.700116	0.679004	1	10459	MAD2L2
GO:0046825	regulation of protein export from nucleus	1/254	36/17913	0.402277	0.700116	0.679004	1	580	BARD1
GO:0048255	mRNA stabilization	1/254	36/17913	0.402277	0.700116	0.679004	1	1869	E2F1
GO:0050982	detection of mechanical stimulus	1/254	36/17913	0.402277	0.700116	0.679004	1	3356	HTR2A
GO:0051293	establishment of spindle localization	1/254	36/17913	0.402277	0.700116	0.679004	1	4134	MAP4
GO:0055090	acylglycerol homeostasis	1/254	36/17913	0.402277	0.700116	0.679004	1	3172	HNF4A
GO:0060251	regulation of glial cell proliferation	1/254	36/17913	0.402277	0.700116	0.679004	1	1869	E2F1
GO:0070328	triglyceride homeostasis	1/254	36/17913	0.402277	0.700116	0.679004	1	3172	HNF4A
GO:0086091	regulation of heart rate by cardiac conduction	1/254	36/17913	0.402277	0.700116	0.679004	1	29119	CTNNA3
GO:0090313	regulation of protein targeting to membrane	1/254	36/17913	0.402277	0.700116	0.679004	1	51763	INPP5K
GO:1900026	positive regulation of substrate adhesion-dependent cell spreading	1/254	36/17913	0.402277	0.700116	0.679004	1	1785	DNM2
GO:1903514	release of sequestered calcium ion into cytosol by endoplasmic reticulum	1/254	36/17913	0.402277	0.700116	0.679004	1	55151	TMEM38B
GO:1905521	regulation of macrophage migration	1/254	36/17913	0.402277	0.700116	0.679004	1	79647	AKIRIN1
GO:0043687	post-translational protein modification	6/254	360/17913	0.402685	0.700431	0.679309	6	5768/80176/23198/5954/285362/5682	QSOX1/SPSB1/PSME4/RCN1/SUMF1/PSMA1
GO:0010632	regulation of epithelial cell migration	5/254	294/17913	0.404586	0.701921	0.680754	5	3675/5606/575/23499/57111	ITGA3/MAP2K3/ADGRB1/MACF1/RAB25
GO:1901990	regulation of mitotic cell cycle phase transition	7/254	428/17913	0.404937	0.701921	0.680754	7	10459/1869/5890/23198/57520/57521/5682	MAD2L2/E2F1/RAD51B/PSME4/HECW2/RPTOR/PSMA1
GO:0042136	neurotransmitter biosynthetic process	2/254	98/17913	0.405895	0.701921	0.680754	2	493/1785	ATP2B4/DNM2
GO:0050848	regulation of calcium-mediated signaling	2/254	98/17913	0.405895	0.701921	0.680754	2	493/23261	ATP2B4/CAMTA1
GO:0099175	regulation of postsynapse organization	2/254	98/17913	0.405895	0.701921	0.680754	2	26052/85358	DNM3/SHANK3
GO:1901606	alpha-amino acid catabolic process	2/254	98/17913	0.405895	0.701921	0.680754	2	493/80150	ATP2B4/ASRGL1
GO:0031032	actomyosin structure organization	3/254	163/17913	0.407899	0.701921	0.680754	3	51763/11155/10391	INPP5K/LDB3/CORO2B
GO:0002714	positive regulation of B cell mediated immunity	1/254	37/17913	0.410769	0.701921	0.680754	1	10459	MAD2L2
GO:0002891	positive regulation of immunoglobulin mediated immune response	1/254	37/17913	0.410769	0.701921	0.680754	1	10459	MAD2L2
GO:0008207	C21-steroid hormone metabolic process	1/254	37/17913	0.410769	0.701921	0.680754	1	654	BMP6
GO:0010614	negative regulation of cardiac muscle hypertrophy	1/254	37/17913	0.410769	0.701921	0.680754	1	493	ATP2B4
GO:0010955	negative regulation of protein processing	1/254	37/17913	0.410769	0.701921	0.680754	1	59082	CARD18
GO:0014912	negative regulation of smooth muscle cell migration	1/254	37/17913	0.410769	0.701921	0.680754	1	65009	NDRG4
GO:0030212	hyaluronan metabolic process	1/254	37/17913	0.410769	0.701921	0.680754	1	3697	ITIH1
GO:0032365	intracellular lipid transport	1/254	37/17913	0.410769	0.701921	0.680754	1	51422	PRKAG2
GO:0033046	negative regulation of sister chromatid segregation	1/254	37/17913	0.410769	0.701921	0.680754	1	10459	MAD2L2
GO:0035315	hair cell differentiation	1/254	37/17913	0.410769	0.701921	0.680754	1	10083	USH1C
GO:0042181	ketone biosynthetic process	1/254	37/17913	0.410769	0.701921	0.680754	1	654	BMP6
GO:0045124	regulation of bone resorption	1/254	37/17913	0.410769	0.701921	0.680754	1	133522	PPARGC1B
GO:0045214	sarcomere organization	1/254	37/17913	0.410769	0.701921	0.680754	1	11155	LDB3
GO:0045684	positive regulation of epidermis development	1/254	37/17913	0.410769	0.701921	0.680754	1	51083	GAL
GO:0048278	vesicle docking	1/254	37/17913	0.410769	0.701921	0.680754	1	65009	NDRG4
GO:0051930	regulation of sensory perception of pain	1/254	37/17913	0.410769	0.701921	0.680754	1	2911	GRM1
GO:0051932	synaptic transmission, GABAergic	1/254	37/17913	0.410769	0.701921	0.680754	1	11188	NISCH
GO:0072665	protein localization to vacuole	1/254	37/17913	0.410769	0.701921	0.680754	1	9146	HGS
GO:1903318	negative regulation of protein maturation	1/254	37/17913	0.410769	0.701921	0.680754	1	59082	CARD18
GO:1903427	negative regulation of reactive oxygen species biosynthetic process	1/254	37/17913	0.410769	0.701921	0.680754	1	493	ATP2B4
GO:1905314	semi-lunar valve development	1/254	37/17913	0.410769	0.701921	0.680754	1	6586	SLIT3
GO:2000648	positive regulation of stem cell proliferation	1/254	37/17913	0.410769	0.701921	0.680754	1	23440	OTP
GO:0001824	blastocyst development	2/254	99/17913	0.410841	0.701921	0.680754	2	1045/3054	CDX2/HCFC1
GO:0005976	polysaccharide metabolic process	2/254	99/17913	0.410841	0.701921	0.680754	2	51763/51422	INPP5K/PRKAG2
GO:0048525	negative regulation of viral process	2/254	99/17913	0.410841	0.701921	0.680754	2	2219/51763	FCN1/INPP5K
GO:0009201	ribonucleoside triphosphate biosynthetic process	3/254	164/17913	0.411695	0.702895	0.681699	3	4833/51422/3356	NME4/PRKAG2/HTR2A
GO:0050663	cytokine secretion	4/254	230/17913	0.411869	0.702895	0.681699	4	2219/59082/84818/112744	FCN1/CARD18/IL17RC/IL17F
GO:0043410	positive regulation of MAPK cascade	8/254	499/17913	0.412756	0.704018	0.682788	8	65009/6504/5606/5605/2651/5608/2911/3356	NDRG4/SLAMF1/MAP2K3/MAP2K2/GCNT2/MAP2K6/GRM1/HTR2A
GO:0009150	purine ribonucleotide metabolic process	8/254	500/17913	0.414913	0.706889	0.685572	8	4833/51422/1740/5169/84532/5142/4724/3356	NME4/PRKAG2/DLG2/ENPP3/ACSS1/PDE4B/NDUFS4/HTR2A
GO:0051271	negative regulation of cellular component movement	6/254	365/17913	0.415321	0.706889	0.685572	6	65009/10076/11188/7049/575/753	NDRG4/PTPRU/NISCH/TGFBR3/ADGRB1/LDLRAD4
GO:0034614	cellular response to reactive oxygen species	3/254	165/17913	0.415483	0.706889	0.685572	3	133522/7225/1785	PPARGC1B/TRPC6/DNM2
GO:0034728	nucleosome organization	3/254	165/17913	0.415483	0.706889	0.685572	3	23198/4869/7290	PSME4/NPM1/HIRA
GO:0046545	development of primary female sexual characteristics	2/254	100/17913	0.415768	0.706889	0.685572	2	2516/6586	NR5A1/SLIT3
GO:0001825	blastocyst formation	1/254	38/17913	0.419142	0.706889	0.685572	1	1045	CDX2
GO:0006656	phosphatidylcholine biosynthetic process	1/254	38/17913	0.419142	0.706889	0.685572	1	1103	CHAT
GO:0007210	serotonin receptor signaling pathway	1/254	38/17913	0.419142	0.706889	0.685572	1	3356	HTR2A
GO:0032008	positive regulation of TOR signaling	1/254	38/17913	0.419142	0.706889	0.685572	1	57521	RPTOR
GO:0033280	response to vitamin D	1/254	38/17913	0.419142	0.706889	0.685572	1	7299	TYR
GO:0038202	TORC1 signaling	1/254	38/17913	0.419142	0.706889	0.685572	1	57521	RPTOR
GO:0043267	negative regulation of potassium ion transport	1/254	38/17913	0.419142	0.706889	0.685572	1	3356	HTR2A
GO:0043331	response to dsRNA	1/254	38/17913	0.419142	0.706889	0.685572	1	4869	NPM1
GO:0051931	regulation of sensory perception	1/254	38/17913	0.419142	0.706889	0.685572	1	2911	GRM1
GO:0051985	negative regulation of chromosome segregation	1/254	38/17913	0.419142	0.706889	0.685572	1	10459	MAD2L2
GO:0086005	ventricular cardiac muscle cell action potential	1/254	38/17913	0.419142	0.706889	0.685572	1	29119	CTNNA3
GO:0097178	ruffle assembly	1/254	38/17913	0.419142	0.706889	0.685572	1	51763	INPP5K
GO:2001222	regulation of neuron migration	1/254	38/17913	0.419142	0.706889	0.685572	1	1496	CTNNA2
GO:0016241	regulation of macroautophagy	3/254	166/17913	0.419263	0.706889	0.685572	3	5768/51422/57521	QSOX1/PRKAG2/RPTOR
GO:0030307	positive regulation of cell growth	3/254	166/17913	0.419263	0.706889	0.685572	3	9699/23499/57521	RIMS2/MACF1/RPTOR
GO:0051262	protein tetramerization	3/254	166/17913	0.419263	0.706889	0.685572	3	7915/79054/5195	ALDH5A1/TRPM8/PEX14
GO:0070498	interleukin-1-mediated signaling pathway	2/254	101/17913	0.420674	0.708492	0.687127	2	23198/5682	PSME4/PSMA1
GO:2000379	positive regulation of reactive oxygen species metabolic process	2/254	101/17913	0.420674	0.708492	0.687127	2	575/1785	ADGRB1/DNM2
GO:0098742	cell-cell adhesion via plasma-membrane adhesion molecules	4/254	233/17913	0.421412	0.709346	0.687955	4	56146/5010/56147/5792	PCDHA2/CLDN11/PCDHA1/PTPRF
GO:0006401	RNA catabolic process	6/254	368/17913	0.42289	0.710912	0.689474	6	131405/1869/23198/4869/5682/22882	TRIM71/E2F1/PSME4/NPM1/PSMA1/ZHX2
GO:0030308	negative regulation of cell growth	3/254	167/17913	0.423036	0.710912	0.689474	3	51083/3172/6586	GAL/HNF4A/SLIT3
GO:0033209	tumor necrosis factor-mediated signaling pathway	3/254	167/17913	0.423036	0.710912	0.689474	3	23198/5682/943	PSME4/PSMA1/TNFRSF8
GO:0006289	nucleotide-excision repair	2/254	102/17913	0.425559	0.712403	0.69092	2	57654/5435	UVSSA/POLR2F
GO:0000096	sulfur amino acid metabolic process	1/254	39/17913	0.427396	0.712403	0.69092	1	339896	GADL1
GO:0010661	positive regulation of muscle cell apoptotic process	1/254	39/17913	0.427396	0.712403	0.69092	1	1871	E2F3
GO:0010874	regulation of cholesterol efflux	1/254	39/17913	0.427396	0.712403	0.69092	1	26154	ABCA12
GO:0014741	negative regulation of muscle hypertrophy	1/254	39/17913	0.427396	0.712403	0.69092	1	493	ATP2B4
GO:0030501	positive regulation of bone mineralization	1/254	39/17913	0.427396	0.712403	0.69092	1	654	BMP6
GO:0033003	regulation of mast cell activation	1/254	39/17913	0.427396	0.712403	0.69092	1	5169	ENPP3
GO:0042269	regulation of natural killer cell mediated cytotoxicity	1/254	39/17913	0.427396	0.712403	0.69092	1	7409	VAV1
GO:0046834	lipid phosphorylation	1/254	39/17913	0.427396	0.712403	0.69092	1	5297	PI4KA
GO:0050433	regulation of catecholamine secretion	1/254	39/17913	0.427396	0.712403	0.69092	1	3356	HTR2A
GO:0060045	positive regulation of cardiac muscle cell proliferation	1/254	39/17913	0.427396	0.712403	0.69092	1	7049	TGFBR3
GO:0060119	inner ear receptor cell development	1/254	39/17913	0.427396	0.712403	0.69092	1	10083	USH1C
GO:0071548	response to dexamethasone	1/254	39/17913	0.427396	0.712403	0.69092	1	9101	USP8
GO:0090207	regulation of triglyceride metabolic process	1/254	39/17913	0.427396	0.712403	0.69092	1	64788	LMF1
GO:2000008	regulation of protein localization to cell surface	1/254	39/17913	0.427396	0.712403	0.69092	1	26154	ABCA12
GO:1901991	negative regulation of mitotic cell cycle phase transition	4/254	235/17913	0.427754	0.712614	0.691124	4	10459/1869/23198/5682	MAD2L2/E2F1/PSME4/PSMA1
GO:0007034	vacuolar transport	2/254	103/17913	0.430423	0.715731	0.694148	2	9146/1045	HGS/CDX2
GO:0014812	muscle cell migration	2/254	103/17913	0.430423	0.715731	0.694148	2	65009/79647	NDRG4/AKIRIN1
GO:0099565	chemical synaptic transmission, postsynaptic	2/254	103/17913	0.430423	0.715731	0.694148	2	9699/85358	RIMS2/SHANK3
GO:0038095	Fc-epsilon receptor signaling pathway	3/254	169/17913	0.430555	0.715731	0.694148	3	7409/23198/5682	VAV1/PSME4/PSMA1
GO:0071453	cellular response to oxygen levels	4/254	237/17913	0.434078	0.717801	0.696155	4	1869/23198/7225/5682	E2F1/PSME4/TRPC6/PSMA1
GO:0001936	regulation of endothelial cell proliferation	3/254	170/17913	0.434302	0.717801	0.696155	3	654/26051/57521	BMP6/PPP1R16B/RPTOR
GO:0001912	positive regulation of leukocyte mediated cytotoxicity	1/254	40/17913	0.435533	0.717801	0.696155	1	7409	VAV1
GO:0006509	membrane protein ectodomain proteolysis	1/254	40/17913	0.435533	0.717801	0.696155	1	4898	NRDC
GO:0007618	mating	1/254	40/17913	0.435533	0.717801	0.696155	1	8648	NCOA1
GO:0010824	regulation of centrosome duplication	1/254	40/17913	0.435533	0.717801	0.696155	1	4869	NPM1
GO:0019369	arachidonic acid metabolic process	1/254	40/17913	0.435533	0.717801	0.696155	1	2053	EPHX2
GO:0019985	translesion synthesis	1/254	40/17913	0.435533	0.717801	0.696155	1	10459	MAD2L2
GO:0030810	positive regulation of nucleotide biosynthetic process	1/254	40/17913	0.435533	0.717801	0.696155	1	3356	HTR2A
GO:0032692	negative regulation of interleukin-1 production	1/254	40/17913	0.435533	0.717801	0.696155	1	59082	CARD18
GO:0035735	intraciliary transport involved in cilium assembly	1/254	40/17913	0.435533	0.717801	0.696155	1	23059	CLUAP1
GO:0038084	vascular endothelial growth factor signaling pathway	1/254	40/17913	0.435533	0.717801	0.696155	1	57556	SEMA6A
GO:0043403	skeletal muscle tissue regeneration	1/254	40/17913	0.435533	0.717801	0.696155	1	79647	AKIRIN1
GO:0050832	defense response to fungus	1/254	40/17913	0.435533	0.717801	0.696155	1	84818	IL17RC
GO:0061028	establishment of endothelial barrier	1/254	40/17913	0.435533	0.717801	0.696155	1	26051	PPP1R16B
GO:1900373	positive regulation of purine nucleotide biosynthetic process	1/254	40/17913	0.435533	0.717801	0.696155	1	3356	HTR2A
GO:0043433	negative regulation of DNA-binding transcription factor activity	3/254	171/17913	0.43804	0.7206	0.69887	3	10459/55914/5195	MAD2L2/ERBIN/PEX14
GO:0008033	tRNA processing	2/254	105/17913	0.440085	0.7206	0.69887	2	10667/10785	FARS2/WDR4
GO:0051341	regulation of oxidoreductase activity	2/254	105/17913	0.440085	0.7206	0.69887	2	493/1785	ATP2B4/DNM2
GO:0019318	hexose metabolic process	4/254	239/17913	0.440383	0.7206	0.69887	4	4041/7915/11188/51763	LRP5/ALDH5A1/NISCH/INPP5K
GO:0051783	regulation of nuclear division	3/254	172/17913	0.441768	0.7206	0.69887	3	4041/10459/57520	LRP5/MAD2L2/HECW2
GO:0000381	regulation of alternative mRNA splicing, via spliceosome	1/254	41/17913	0.443555	0.7206	0.69887	1	83989	FAM172A
GO:0002639	positive regulation of immunoglobulin production	1/254	41/17913	0.443555	0.7206	0.69887	1	10459	MAD2L2
GO:0006911	phagocytosis, engulfment	1/254	41/17913	0.443555	0.7206	0.69887	1	575	ADGRB1
GO:0009163	nucleoside biosynthetic process	1/254	41/17913	0.443555	0.7206	0.69887	1	4833	NME4
GO:0010569	regulation of double-strand break repair via homologous recombination	1/254	41/17913	0.443555	0.7206	0.69887	1	10459	MAD2L2
GO:0010677	negative regulation of cellular carbohydrate metabolic process	1/254	41/17913	0.443555	0.7206	0.69887	1	51763	INPP5K
GO:0031057	negative regulation of histone modification	1/254	41/17913	0.443555	0.7206	0.69887	1	5079	PAX5
GO:0032881	regulation of polysaccharide metabolic process	1/254	41/17913	0.443555	0.7206	0.69887	1	51763	INPP5K
GO:0034122	negative regulation of toll-like receptor signaling pathway	1/254	41/17913	0.443555	0.7206	0.69887	1	23643	LY96
GO:0043489	RNA stabilization	1/254	41/17913	0.443555	0.7206	0.69887	1	1869	E2F1
GO:0045773	positive regulation of axon extension	1/254	41/17913	0.443555	0.7206	0.69887	1	23499	MACF1
GO:0048066	developmental pigmentation	1/254	41/17913	0.443555	0.7206	0.69887	1	7299	TYR
GO:0050434	positive regulation of viral transcription	1/254	41/17913	0.443555	0.7206	0.69887	1	5435	POLR2F
GO:0050873	brown fat cell differentiation	1/254	41/17913	0.443555	0.7206	0.69887	1	63976	PRDM16
GO:0051653	spindle localization	1/254	41/17913	0.443555	0.7206	0.69887	1	4134	MAP4
GO:0060612	adipose tissue development	1/254	41/17913	0.443555	0.7206	0.69887	1	4041	LRP5
GO:0070296	sarcoplasmic reticulum calcium ion transport	1/254	41/17913	0.443555	0.7206	0.69887	1	55151	TMEM38B
GO:0070317	negative regulation of G0 to G1 transition	1/254	41/17913	0.443555	0.7206	0.69887	1	1869	E2F1
GO:0098659	inorganic cation import across plasma membrane	1/254	41/17913	0.443555	0.7206	0.69887	1	493	ATP2B4
GO:0099587	inorganic ion import across plasma membrane	1/254	41/17913	0.443555	0.7206	0.69887	1	493	ATP2B4
GO:1903146	regulation of autophagy of mitochondrion	1/254	41/17913	0.443555	0.7206	0.69887	1	2017	CTTN
GO:1903580	positive regulation of ATP metabolic process	1/254	41/17913	0.443555	0.7206	0.69887	1	3356	HTR2A
GO:0006354	DNA-templated transcription, elongation	2/254	106/17913	0.444882	0.721233	0.699484	2	5435/25885	POLR2F/POLR1A
GO:0022904	respiratory electron transport chain	2/254	106/17913	0.444882	0.721233	0.699484	2	7915/4724	ALDH5A1/NDUFS4
GO:0043502	regulation of muscle adaptation	2/254	106/17913	0.444882	0.721233	0.699484	2	493/7402	ATP2B4/UTRN
GO:0055017	cardiac muscle tissue growth	2/254	106/17913	0.444882	0.721233	0.699484	2	65009/7049	NDRG4/TGFBR3
GO:0010634	positive regulation of epithelial cell migration	3/254	173/17913	0.445487	0.721455	0.699699	3	3675/5606/57111	ITGA3/MAP2K3/RAB25
GO:1903034	regulation of response to wounding	3/254	173/17913	0.445487	0.721455	0.699699	3	7056/146760/5792	THBD/RTN4RL1/PTPRF
GO:0001819	positive regulation of cytokine production	7/254	446/17913	0.446601	0.722607	0.700816	7	2219/5435/84818/943/5142/23643/112744	FCN1/POLR2F/IL17RC/TNFRSF8/PDE4B/LY96/IL17F
GO:0038093	Fc receptor signaling pathway	4/254	241/17913	0.446668	0.722607	0.700816	4	3055/7409/23198/5682	HCK/VAV1/PSME4/PSMA1
GO:0071214	cellular response to abiotic stimulus	5/254	310/17913	0.449172	0.722763	0.700968	5	654/4869/2911/1785/943	BMP6/NPM1/GRM1/DNM2/TNFRSF8
GO:0104004	cellular response to environmental stimulus	5/254	310/17913	0.449172	0.722763	0.700968	5	654/4869/2911/1785/943	BMP6/NPM1/GRM1/DNM2/TNFRSF8
GO:0014902	myotube differentiation	2/254	107/17913	0.449656	0.722763	0.700968	2	90342/575	FER1L5/ADGRB1
GO:0062014	negative regulation of small molecule metabolic process	2/254	107/17913	0.449656	0.722763	0.700968	2	493/85300	ATP2B4/ATCAY
GO:1904659	glucose transmembrane transport	2/254	107/17913	0.449656	0.722763	0.700968	2	51763/51422	INPP5K/PRKAG2
GO:0002715	regulation of natural killer cell mediated immunity	1/254	42/17913	0.451463	0.722763	0.700968	1	7409	VAV1
GO:0006221	pyrimidine nucleotide biosynthetic process	1/254	42/17913	0.451463	0.722763	0.700968	1	4833	NME4
GO:0006418	tRNA aminoacylation for protein translation	1/254	42/17913	0.451463	0.722763	0.700968	1	10667	FARS2
GO:0014047	glutamate secretion	1/254	42/17913	0.451463	0.722763	0.700968	1	10815	CPLX1
GO:0021983	pituitary gland development	1/254	42/17913	0.451463	0.722763	0.700968	1	23440	OTP
GO:0032309	icosanoid secretion	1/254	42/17913	0.451463	0.722763	0.700968	1	5608	MAP2K6
GO:0034080	CENP-A containing nucleosome assembly	1/254	42/17913	0.451463	0.722763	0.700968	1	4869	NPM1
GO:0045104	intermediate filament cytoskeleton organization	1/254	42/17913	0.451463	0.722763	0.700968	1	55914	ERBIN
GO:0045429	positive regulation of nitric oxide biosynthetic process	1/254	42/17913	0.451463	0.722763	0.700968	1	1785	DNM2
GO:0046189	phenol-containing compound biosynthetic process	1/254	42/17913	0.451463	0.722763	0.700968	1	7299	TYR
GO:0051646	mitochondrion localization	1/254	42/17913	0.451463	0.722763	0.700968	1	85300	ATCAY
GO:0060999	positive regulation of dendritic spine development	1/254	42/17913	0.451463	0.722763	0.700968	1	85358	SHANK3
GO:0061641	CENP-A containing chromatin organization	1/254	42/17913	0.451463	0.722763	0.700968	1	4869	NPM1
GO:0090311	regulation of protein deacetylation	1/254	42/17913	0.451463	0.722763	0.700968	1	10129	FRY
GO:1901659	glycosyl compound biosynthetic process	1/254	42/17913	0.451463	0.722763	0.700968	1	4833	NME4
GO:0009142	nucleoside triphosphate biosynthetic process	3/254	175/17913	0.452896	0.723574	0.701754	3	4833/51422/3356	NME4/PRKAG2/HTR2A
GO:0033002	muscle cell proliferation	4/254	243/17913	0.452931	0.723574	0.701754	4	65009/55810/7049/79647	NDRG4/FOXJ2/TGFBR3/AKIRIN1
GO:0000724	double-strand break repair via homologous recombination	2/254	108/17913	0.454407	0.723574	0.701754	2	10459/5890	MAD2L2/RAD51B
GO:0050684	regulation of mRNA processing	2/254	108/17913	0.454407	0.723574	0.701754	2	580/83989	BARD1/FAM172A
GO:0071156	regulation of cell cycle arrest	2/254	108/17913	0.454407	0.723574	0.701754	2	7709/1869	ZBTB17/E2F1
GO:1903532	positive regulation of secretion by cell	6/254	381/17913	0.45551	0.723574	0.701754	6	2219/9146/654/51083/84818/112744	FCN1/HGS/BMP6/GAL/IL17RC/IL17F
GO:0051924	regulation of calcium ion transport	4/254	244/17913	0.456055	0.723574	0.701754	4	51763/7225/55151/5142	INPP5K/TRPC6/TMEM38B/PDE4B
GO:0045333	cellular respiration	3/254	176/17913	0.456585	0.723574	0.701754	3	7915/63976/4724	ALDH5A1/PRDM16/NDUFS4
GO:1901136	carbohydrate derivative catabolic process	3/254	176/17913	0.456585	0.723574	0.701754	3	375790/5142/9672	AGRN/PDE4B/SDC3
GO:0060562	epithelial tube morphogenesis	5/254	313/17913	0.457448	0.723574	0.701754	5	65009/57534/131405/54922/5754	NDRG4/MIB1/TRIM71/RASIP1/PTK7
GO:0000725	recombinational repair	2/254	109/17913	0.459135	0.723574	0.701754	2	10459/5890	MAD2L2/RAD51B
GO:0008543	fibroblast growth factor receptor signaling pathway	2/254	109/17913	0.459135	0.723574	0.701754	2	131405/5435	TRIM71/POLR2F
GO:0034968	histone lysine methylation	2/254	109/17913	0.459135	0.723574	0.701754	2	5079/63976	PAX5/PRDM16
GO:0042303	molting cycle	2/254	109/17913	0.459135	0.723574	0.701754	2	147495/51083	APCDD1/GAL
GO:0042633	hair cycle	2/254	109/17913	0.459135	0.723574	0.701754	2	147495/51083	APCDD1/GAL
GO:0042737	drug catabolic process	2/254	109/17913	0.459135	0.723574	0.701754	2	80150/1580	ASRGL1/CYP4B1
GO:0043618	regulation of transcription from RNA polymerase II promoter in response to stress	2/254	109/17913	0.459135	0.723574	0.701754	2	23198/5682	PSME4/PSMA1
GO:1900371	regulation of purine nucleotide biosynthetic process	2/254	109/17913	0.459135	0.723574	0.701754	2	51422/3356	PRKAG2/HTR2A
GO:0008089	anterograde axonal transport	1/254	43/17913	0.459259	0.723574	0.701754	1	1740	DLG2
GO:0009409	response to cold	1/254	43/17913	0.459259	0.723574	0.701754	1	79054	TRPM8
GO:0010470	regulation of gastrulation	1/254	43/17913	0.459259	0.723574	0.701754	1	3172	HNF4A
GO:0034105	positive regulation of tissue remodeling	1/254	43/17913	0.459259	0.723574	0.701754	1	133522	PPARGC1B
GO:0045103	intermediate filament-based process	1/254	43/17913	0.459259	0.723574	0.701754	1	55914	ERBIN
GO:0050850	positive regulation of calcium-mediated signaling	1/254	43/17913	0.459259	0.723574	0.701754	1	23261	CAMTA1
GO:0051602	response to electrical stimulus	1/254	43/17913	0.459259	0.723574	0.701754	1	2911	GRM1
GO:0071715	icosanoid transport	1/254	43/17913	0.459259	0.723574	0.701754	1	5608	MAP2K6
GO:1901028	regulation of mitochondrial outer membrane permeabilization involved in apoptotic signaling pathway	1/254	43/17913	0.459259	0.723574	0.701754	1	1869	E2F1
GO:1901571	fatty acid derivative transport	1/254	43/17913	0.459259	0.723574	0.701754	1	5608	MAP2K6
GO:1902373	negative regulation of mRNA catabolic process	1/254	43/17913	0.459259	0.723574	0.701754	1	1869	E2F1
GO:1904407	positive regulation of nitric oxide metabolic process	1/254	43/17913	0.459259	0.723574	0.701754	1	1785	DNM2
GO:1904646	cellular response to amyloid-beta	1/254	43/17913	0.459259	0.723574	0.701754	1	773	CACNA1A
GO:0009205	purine ribonucleoside triphosphate metabolic process	5/254	314/17913	0.460199	0.724684	0.70283	5	4833/51422/5169/4724/3356	NME4/PRKAG2/ENPP3/NDUFS4/HTR2A
GO:0045765	regulation of angiogenesis	6/254	383/17913	0.460495	0.724779	0.702922	6	9146/55810/57556/26051/575/112744	HGS/FOXJ2/SEMA6A/PPP1R16B/ADGRB1/IL17F
GO:0045017	glycerolipid biosynthetic process	4/254	246/17913	0.462283	0.727222	0.705292	4	5297/51763/1103/3356	PI4KA/INPP5K/CHAT/HTR2A
GO:0006096	glycolytic process	2/254	110/17913	0.463839	0.727954	0.706002	2	51422/3356	PRKAG2/HTR2A
GO:0006805	xenobiotic metabolic process	2/254	110/17913	0.463839	0.727954	0.706002	2	2053/3172	EPHX2/HNF4A
GO:0030808	regulation of nucleotide biosynthetic process	2/254	110/17913	0.463839	0.727954	0.706002	2	51422/3356	PRKAG2/HTR2A
GO:1903578	regulation of ATP metabolic process	2/254	110/17913	0.463839	0.727954	0.706002	2	51422/3356	PRKAG2/HTR2A
GO:0006333	chromatin assembly or disassembly	3/254	178/17913	0.463932	0.727954	0.706002	3	4869/22893/7290	NPM1/BAHD1/HIRA
GO:0002437	inflammatory response to antigenic stimulus	1/254	44/17913	0.466945	0.728039	0.706085	1	5682	PSMA1
GO:0032459	regulation of protein oligomerization	1/254	44/17913	0.466945	0.728039	0.706085	1	5195	PEX14
GO:0032527	protein exit from endoplasmic reticulum	1/254	44/17913	0.466945	0.728039	0.706085	1	337867	UBAC2
GO:0042461	photoreceptor cell development	1/254	44/17913	0.466945	0.728039	0.706085	1	94137	RP1L1
GO:0046164	alcohol catabolic process	1/254	44/17913	0.466945	0.728039	0.706085	1	51763	INPP5K
GO:0048701	embryonic cranial skeleton morphogenesis	1/254	44/17913	0.466945	0.728039	0.706085	1	5079	PAX5
GO:0050706	regulation of interleukin-1 beta secretion	1/254	44/17913	0.466945	0.728039	0.706085	1	59082	CARD18
GO:0061014	positive regulation of mRNA catabolic process	1/254	44/17913	0.466945	0.728039	0.706085	1	131405	TRIM71
GO:0071622	regulation of granulocyte chemotaxis	1/254	44/17913	0.466945	0.728039	0.706085	1	79647	AKIRIN1
GO:0071806	protein transmembrane transport	1/254	44/17913	0.466945	0.728039	0.706085	1	5195	PEX14
GO:1903573	negative regulation of response to endoplasmic reticulum stress	1/254	44/17913	0.466945	0.728039	0.706085	1	337867	UBAC2
GO:0035265	organ growth	3/254	179/17913	0.467589	0.728039	0.706085	3	65009/7049/55151	NDRG4/TGFBR3/TMEM38B
GO:0043409	negative regulation of MAPK cascade	3/254	179/17913	0.467589	0.728039	0.706085	3	2048/51763/57556	EPHB2/INPP5K/SEMA6A
GO:0009167	purine ribonucleoside monophosphate metabolic process	5/254	317/17913	0.468428	0.728039	0.706085	5	51422/1740/5169/4724/3356	PRKAG2/DLG2/ENPP3/NDUFS4/HTR2A
GO:0006757	ATP generation from ADP	2/254	111/17913	0.468519	0.728039	0.706085	2	51422/3356	PRKAG2/HTR2A
GO:0051149	positive regulation of muscle cell differentiation	2/254	111/17913	0.468519	0.728039	0.706085	2	1496/575	CTNNA2/ADGRB1
GO:0050708	regulation of protein secretion	7/254	456/17913	0.469551	0.728039	0.706085	7	2219/654/59082/773/84818/3172/112744	FCN1/BMP6/CARD18/CACNA1A/IL17RC/HNF4A/IL17F
GO:0007568	aging	5/254	318/17913	0.471163	0.728039	0.706085	5	5079/7225/4869/2516/3356	PAX5/TRPC6/NPM1/NR5A1/HTR2A
GO:0009126	purine nucleoside monophosphate metabolic process	5/254	318/17913	0.471163	0.728039	0.706085	5	51422/1740/5169/4724/3356	PRKAG2/DLG2/ENPP3/NDUFS4/HTR2A
GO:0003007	heart morphogenesis	4/254	249/17913	0.47158	0.728039	0.706085	4	65009/57534/7049/6586	NDRG4/MIB1/TGFBR3/SLIT3
GO:0008016	regulation of heart contraction	4/254	249/17913	0.47158	0.728039	0.706085	4	493/55151/29119/5142	ATP2B4/TMEM38B/CTNNA3/PDE4B
GO:0008645	hexose transmembrane transport	2/254	112/17913	0.473174	0.728039	0.706085	2	51763/51422	INPP5K/PRKAG2
GO:0042157	lipoprotein metabolic process	2/254	112/17913	0.473174	0.728039	0.706085	2	83734/29881	ATG10/NPC1L1
GO:0051209	release of sequestered calcium ion into cytosol	2/254	112/17913	0.473174	0.728039	0.706085	2	55151/3356	TMEM38B/HTR2A
GO:0051283	negative regulation of sequestering of calcium ion	2/254	112/17913	0.473174	0.728039	0.706085	2	55151/3356	TMEM38B/HTR2A
GO:0060419	heart growth	2/254	112/17913	0.473174	0.728039	0.706085	2	65009/7049	NDRG4/TGFBR3
GO:1903510	mucopolysaccharide metabolic process	2/254	112/17913	0.473174	0.728039	0.706085	2	3697/10090	ITIH1/UST
GO:0009199	ribonucleoside triphosphate metabolic process	5/254	319/17913	0.473893	0.728039	0.706085	5	4833/51422/5169/4724/3356	NME4/PRKAG2/ENPP3/NDUFS4/HTR2A
GO:0002279	mast cell activation involved in immune response	1/254	45/17913	0.474522	0.728039	0.706085	1	5169	ENPP3
GO:0005978	glycogen biosynthetic process	1/254	45/17913	0.474522	0.728039	0.706085	1	51763	INPP5K
GO:0009250	glucan biosynthetic process	1/254	45/17913	0.474522	0.728039	0.706085	1	51763	INPP5K
GO:0010463	mesenchymal cell proliferation	1/254	45/17913	0.474522	0.728039	0.706085	1	4041	LRP5
GO:0018208	peptidyl-proline modification	1/254	45/17913	0.474522	0.728039	0.706085	1	55214	P3H2
GO:0030834	regulation of actin filament depolymerization	1/254	45/17913	0.474522	0.728039	0.706085	1	57482	KIAA1211
GO:0032570	response to progesterone	1/254	45/17913	0.474522	0.728039	0.706085	1	8648	NCOA1
GO:0033628	regulation of cell adhesion mediated by integrin	1/254	45/17913	0.474522	0.728039	0.706085	1	8631	SKAP1
GO:0042551	neuron maturation	1/254	45/17913	0.474522	0.728039	0.706085	1	375790	AGRN
GO:0043039	tRNA aminoacylation	1/254	45/17913	0.474522	0.728039	0.706085	1	10667	FARS2
[truncated: 1,078 more rows]

## Sheet: gene_filter peaks_Ctrl_MF.
ID	Description	GeneRatio	BgRatio	pvalue	p.adjust	qvalue	Count	ENTREZID	SYMBOL
GO:0051015	actin filament binding	9/255	143/16969	0.00031455	0.154444	0.147011	9	2318/10083/3927/1496/10391/29119/23499/7402/4645	FLNC/USH1C/LASP1/CTNNA2/CORO2B/CTNNA3/MACF1/UTRN/MYO5B
GO:0050998	nitric-oxide synthase binding	3/255	14/16969	0.00107989	0.202976	0.193207	3	493/26052/1785	ATP2B4/DNM3/DNM2
GO:0098918	structural constituent of synapse	3/255	15/16969	0.00133494	0.202976	0.193207	3	8927/1740/26052	BSN/DLG2/DNM3
GO:0031489	myosin V binding	3/255	17/16969	0.00195126	0.202976	0.193207	3	29881/115827/57111	NPC1L1/RAB3C/RAB25
GO:0035254	glutamate receptor binding	4/255	38/16969	0.00246099	0.202976	0.193207	4	22941/26052/79953/85358	SHANK2/DNM3/SYNDIG1/SHANK3
GO:0033613	activating transcription factor binding	5/255	64/16969	0.00272974	0.202976	0.193207	5	10459/4869/63976/3054/3172	MAD2L2/NPM1/PRDM16/HCFC1/HNF4A
GO:0015026	coreceptor activity	4/255	40/16969	0.00297641	0.202976	0.193207	4	4041/7049/5754/23643	LRP5/TGFBR3/PTK7/LY96
GO:0003779	actin binding	13/255	361/16969	0.00330714	0.202976	0.193207	13	4892/2318/10083/3927/57553/1496/7225/10391/29119/23499/7402/4645/85358	NRAP/FLNC/USH1C/LASP1/MICAL3/CTNNA2/TRPC6/CORO2B/CTNNA3/MACF1/UTRN/MYO5B/SHANK3
GO:0042805	actinin binding	3/255	29/16969	0.0091838	0.351079	0.334182	3	4892/11155/7225	NRAP/LDB3/TRPC6
GO:0016208	AMP binding	2/255	10/16969	0.0093484	0.351079	0.334182	2	51422/84532	PRKAG2/ACSS1
GO:0099186	structural constituent of postsynapse	2/255	10/16969	0.0093484	0.351079	0.334182	2	1740/26052	DLG2/DNM3
GO:0004713	protein tyrosine kinase activity	6/255	120/16969	0.00955668	0.351079	0.334182	6	3055/2048/5606/5605/5608/4593	HCK/EPHB2/MAP2K3/MAP2K2/MAP2K6/MUSK
GO:0001530	lipopolysaccharide binding	3/255	30/16969	0.0100927	0.351079	0.334182	3	575/5682/23643	ADGRB1/PSMA1/LY96
GO:0015643	toxic substance binding	2/255	11/16969	0.0113133	0.351079	0.334182	2	1580/2053	CYP4B1/EPHX2
GO:0017166	vinculin binding	2/255	11/16969	0.0113133	0.351079	0.334182	2	10391/7402	CORO2B/UTRN
GO:0004857	enzyme inhibitor activity	11/255	332/16969	0.0119855	0.351079	0.334182	11	3697/493/22853/51422/4018/10129/59082/4869/57521/10842/124857	ITIH1/ATP2B4/LMTK2/PRKAG2/LPA/FRY/CARD18/NPM1/RPTOR/PPP1R17/WFIKKN2
GO:0017022	myosin binding	4/255	60/16969	0.0125821	0.351079	0.334182	4	22853/29881/115827/57111	LMTK2/NPC1L1/RAB3C/RAB25
GO:0033691	sialic acid binding	2/255	12/16969	0.0134425	0.351079	0.334182	2	2219/375790	FCN1/AGRN
GO:0042626	ATPase activity, coupled to transmembrane movement of substances	4/255	62/16969	0.0140643	0.351079	0.334182	4	493/26154/64241/64240	ATP2B4/ABCA12/ABCG8/ABCG5
GO:0004180	carboxypeptidase activity	3/255	35/16969	0.0154023	0.351079	0.334182	3	5547/1360/1368	PRCP/CPB1/CPM
GO:0008238	exopeptidase activity	5/255	97/16969	0.0155095	0.351079	0.334182	5	80150/5547/1360/1368/4012	ASRGL1/PRCP/CPB1/CPM/LNPEP
GO:0004708	MAP kinase kinase activity	2/255	13/16969	0.0157306	0.351079	0.334182	2	5605/5608	MAP2K2/MAP2K6
GO:0050839	cell adhesion molecule binding	13/255	444/16969	0.0171248	0.362812	0.34535	13	3675/5297/11188/3927/1496/3054/2017/9101/29119/9379/23499/5792/7402	ITGA3/PI4KA/NISCH/LASP1/CTNNA2/HCFC1/CTTN/USP8/CTNNA3/NRXN2/MACF1/PTPRF/UTRN
GO:0015399	primary active transmembrane transporter activity	4/255	68/16969	0.0191575	0.362812	0.34535	4	493/26154/64241/64240	ATP2B4/ABCA12/ABCG8/ABCG5
GO:0015405	P-P-bond-hydrolysis-driven transmembrane transporter activity	4/255	68/16969	0.0191575	0.362812	0.34535	4	493/26154/64241/64240	ATP2B4/ABCA12/ABCG8/ABCG5
GO:0008188	neuropeptide receptor activity	3/255	38/16969	0.019212	0.362812	0.34535	3	84634/3062/51083	KISS1R/HCRTR2/GAL
GO:0043492	ATPase activity, coupled to movement of substances	4/255	69/16969	0.0201033	0.365582	0.347987	4	493/26154/64241/64240	ATP2B4/ABCA12/ABCG8/ABCG5
GO:0017137	Rab GTPase binding	5/255	109/16969	0.0243666	0.41766	0.397558	5	55255/29881/57553/7813/4645	WDR41/NPC1L1/MICAL3/EVI5/MYO5B
GO:0005001	transmembrane receptor protein tyrosine phosphatase activity	2/255	17/16969	0.0263696	0.41766	0.397558	2	10076/5792	PTPRU/PTPRF
GO:0008329	signaling pattern recognition receptor activity	2/255	17/16969	0.0263696	0.41766	0.397558	2	2219/23643	FCN1/LY96
GO:0019198	transmembrane receptor protein phosphatase activity	2/255	17/16969	0.0263696	0.41766	0.397558	2	10076/5792	PTPRU/PTPRF
GO:0038187	pattern recognition receptor activity	2/255	18/16969	0.0293763	0.450742	0.429048	2	2219/23643	FCN1/LY96
GO:0017127	cholesterol transporter activity	2/255	19/16969	0.0325124	0.46538	0.442981	2	64241/64240	ABCG8/ABCG5
GO:0008373	sialyltransferase activity	2/255	20/16969	0.0357733	0.46538	0.442981	2	8869/29906	ST3GAL5/ST8SIA5
GO:0031418	L-ascorbic acid binding	2/255	20/16969	0.0357733	0.46538	0.442981	2	283208/55214	P4HA3/P3H2
GO:0017124	SH3 domain binding	5/255	122/16969	0.0370553	0.46538	0.442981	5	22941/8631/9101/1785/85358	SHANK2/SKAP1/USP8/DNM2/SHANK3
GO:0050431	transforming growth factor beta binding	2/255	21/16969	0.0391546	0.46538	0.442981	2	7049/124857	TGFBR3/WFIKKN2
GO:0051393	alpha-actinin binding	2/255	21/16969	0.0391546	0.46538	0.442981	2	4892/11155	NRAP/LDB3
GO:0005088	Ras guanyl-nucleotide exchange factor activity	5/255	125/16969	0.0404649	0.46538	0.442981	5	55255/7409/5924/9649/115727	WDR41/VAV1/RASGRF2/RALGPS1/RASGRP4
GO:0004112	cyclic-nucleotide phosphodiesterase activity	2/255	22/16969	0.0426519	0.46538	0.442981	2	50940/5142	PDE11A/PDE4B
GO:0004114	3',5'-cyclic-nucleotide phosphodiesterase activity	2/255	22/16969	0.0426519	0.46538	0.442981	2	50940/5142	PDE11A/PDE4B
GO:0015248	sterol transporter activity	2/255	22/16969	0.0426519	0.46538	0.442981	2	64241/64240	ABCG8/ABCG5
GO:0030159	receptor signaling complex scaffold activity	2/255	22/16969	0.0426519	0.46538	0.442981	2	22941/85358	SHANK2/SHANK3
GO:0030742	GTP-dependent protein binding	2/255	22/16969	0.0426519	0.46538	0.442981	2	115827/115727	RAB3C/RASGRP4
GO:0099528	G protein-coupled neurotransmitter receptor activity	2/255	22/16969	0.0426519	0.46538	0.442981	2	2911/3356	GRM1/HTR2A
GO:0005507	copper ion binding	3/255	53/16969	0.0453376	0.483929	0.460638	3	341208/7299/285362	HEPHL1/TYR/SUMF1
GO:0001968	fibronectin binding	2/255	24/16969	0.049978	0.512548	0.487879	2	3675/4018	ITGA3/LPA
GO:0031406	carboxylic acid binding	6/255	176/16969	0.0501065	0.512548	0.487879	6	2219/375790/3141/283208/3172/55214	FCN1/AGRN/HLCS/P4HA3/HNF4A/P3H2
GO:0043177	organic acid binding	6/255	178/16969	0.0523957	0.515273	0.490474	6	2219/375790/3141/283208/3172/55214	FCN1/AGRN/HLCS/P4HA3/HNF4A/P3H2
GO:0017016	Ras GTPase binding	9/255	320/16969	0.0531916	0.515273	0.490474	9	55255/7409/5924/29881/57553/7813/9649/4645/115727	WDR41/VAV1/RASGRF2/NPC1L1/MICAL3/EVI5/RALGPS1/MYO5B/RASGRP4
GO:0071949	FAD binding	2/255	25/16969	0.0537986	0.515273	0.490474	2	5768/57553	QSOX1/MICAL3
GO:0097110	scaffold protein binding	3/255	58/16969	0.0565895	0.515273	0.490474	3	493/5605/85358	ATP2B4/MAP2K2/SHANK3
GO:0016405	CoA-ligase activity	2/255	26/16969	0.057719	0.515273	0.490474	2	28965/84532	SLC27A6/ACSS1
GO:0035255	ionotropic glutamate receptor binding	2/255	26/16969	0.057719	0.515273	0.490474	2	22941/85358	SHANK2/SHANK3
GO:0043236	laminin binding	2/255	26/16969	0.057719	0.515273	0.490474	2	3675/375790	ITGA3/AGRN
GO:0004860	protein kinase inhibitor activity	3/255	60/16969	0.0614269	0.53179	0.506195	3	51422/4869/57521	PRKAG2/NPM1/RPTOR
GO:0017147	Wnt-protein binding	2/255	27/16969	0.0617353	0.53179	0.506195	2	4041/147495	LRP5/APCDD1
GO:0019955	cytokine binding	4/255	100/16969	0.0639999	0.540531	0.514516	4	58985/7049/124857/112744	IL22RA1/TGFBR3/WFIKKN2/IL17F
GO:0031267	small GTPase binding	9/255	333/16969	0.0649519	0.540531	0.514516	9	55255/7409/5924/29881/57553/7813/9649/4645/115727	WDR41/VAV1/RASGRF2/NPC1L1/MICAL3/EVI5/RALGPS1/MYO5B/RASGRP4
GO:0032947	protein-containing complex scaffold activity	2/255	29/16969	0.0700409	0.550419	0.523928	2	22941/85358	SHANK2/SHANK3
GO:0019210	kinase inhibitor activity	3/255	64/16969	0.0716559	0.550419	0.523928	3	51422/4869/57521	PRKAG2/NPM1/RPTOR
GO:0008528	G protein-coupled peptide receptor activity	4/255	105/16969	0.0737359	0.550419	0.523928	4	84634/3062/51763/51083	KISS1R/HCRTR2/INPP5K/GAL
GO:0016878	acid-thiol ligase activity	2/255	30/16969	0.0743229	0.550419	0.523928	2	28965/84532	SLC27A6/ACSS1
GO:0030291	protein serine/threonine kinase inhibitor activity	2/255	30/16969	0.0743229	0.550419	0.523928	2	51422/57521	PRKAG2/RPTOR
GO:0001653	peptide receptor activity	4/255	106/16969	0.0757685	0.550419	0.523928	4	84634/3062/51763/51083	KISS1R/HCRTR2/INPP5K/GAL
GO:0019888	protein phosphatase regulator activity	3/255	66/16969	0.0770385	0.550419	0.523928	3	22853/26051/10842	LMTK2/PPP1R16B/PPP1R17
GO:0035198	miRNA binding	2/255	31/16969	0.0786864	0.550419	0.523928	2	23264/131405	ZC3H7B/TRIM71
GO:0045296	cadherin binding	8/255	297/16969	0.0802272	0.550419	0.523928	8	5297/3927/1496/3054/2017/9101/29119/23499	PI4KA/LASP1/CTNNA2/HCFC1/CTTN/USP8/CTNNA3/MACF1
GO:0030295	protein kinase activator activity	3/255	68/16969	0.0825933	0.550419	0.523928	3	51422/5605/57521	PRKAG2/MAP2K2/RPTOR
GO:0030551	cyclic nucleotide binding	2/255	32/16969	0.083128	0.550419	0.523928	2	50940/5142	PDE11A/PDE4B
GO:0030674	protein binding, bridging	5/255	156/16969	0.0865672	0.550419	0.523928	5	80176/3927/3054/8631/57521	SPSB1/LASP1/HCFC1/SKAP1/RPTOR
GO:0030246	carbohydrate binding	7/255	252/16969	0.0865755	0.550419	0.523928	7	2219/6614/374378/5169/433/283208/55214	FCN1/SIGLEC1/GALNT18/ENPP3/ASGR2/P4HA3/P3H2
GO:0004864	protein phosphatase inhibitor activity	2/255	33/16969	0.0876444	0.550419	0.523928	2	22853/10842	LMTK2/PPP1R17
GO:0042578	phosphoric ester hydrolase activity	8/255	305/16969	0.0901419	0.550419	0.523928	8	10076/51763/2139/50940/5169/5792/2053/5142	PTPRU/INPP5K/EYA2/PDE11A/ENPP3/PTPRF/EPHX2/PDE4B
GO:0046332	SMAD binding	3/255	72/16969	0.0941995	0.550419	0.523928	3	7049/63976/753	TGFBR3/PRDM16/LDLRAD4
GO:0019209	kinase activator activity	3/255	74/16969	0.10024	0.550419	0.523928	3	51422/5605/57521	PRKAG2/MAP2K2/RPTOR
GO:0043394	proteoglycan binding	2/255	36/16969	0.10161	0.550419	0.523928	2	375790/5792	AGRN/PTPRF
GO:0008017	microtubule binding	5/255	166/16969	0.105578	0.550419	0.523928	5	65055/8631/1785/23499/5195	REEP1/SKAP1/DNM2/MACF1/PEX14
GO:0001102	RNA polymerase II activating transcription factor binding	2/255	37/16969	0.106394	0.550419	0.523928	2	10459/3172	MAD2L2/HNF4A
GO:0001784	phosphotyrosine residue binding	2/255	37/16969	0.106394	0.550419	0.523928	2	3055/7409	HCK/VAV1
GO:0005326	neurotransmitter transporter activity	2/255	37/16969	0.106394	0.550419	0.523928	2	153201/10815	SLC36A2/CPLX1
GO:0061980	regulatory RNA binding	2/255	37/16969	0.106394	0.550419	0.523928	2	23264/131405	ZC3H7B/TRIM71
GO:0005200	structural constituent of cytoskeleton	3/255	77/16969	0.109584	0.550419	0.523928	3	375790/55914/1496	AGRN/ERBIN/CTNNA2
GO:0019208	phosphatase regulator activity	3/255	77/16969	0.109584	0.550419	0.523928	3	22853/26051/10842	LMTK2/PPP1R16B/PPP1R17
GO:0051020	GTPase binding	10/255	426/16969	0.109974	0.550419	0.523928	10	55255/7409/54922/5924/29881/57553/7813/9649/4645/115727	WDR41/VAV1/RASIP1/RASGRF2/NPC1L1/MICAL3/EVI5/RALGPS1/MYO5B/RASGRP4
GO:0019212	phosphatase inhibitor activity	2/255	38/16969	0.111238	0.550419	0.523928	2	22853/10842	LMTK2/PPP1R17
GO:0042623	ATPase activity, coupled	6/255	218/16969	0.111361	0.550419	0.523928	6	493/26154/5890/3801/64241/64240	ATP2B4/ABCA12/RAD51B/KIFC3/ABCG8/ABCG5
GO:0008081	phosphoric diester hydrolase activity	3/255	78/16969	0.112771	0.550419	0.523928	3	50940/5169/5142	PDE11A/ENPP3/PDE4B
GO:0030165	PDZ domain binding	3/255	79/16969	0.115993	0.550419	0.523928	3	5605/7049/575	MAP2K2/TGFBR3/ADGRB1
GO:1901681	sulfur compound binding	6/255	221/16969	0.116769	0.550419	0.523928	6	375790/4018/146760/7049/3141/5792	AGRN/LPA/RTN4RL1/TGFBR3/HLCS/PTPRF
GO:0004712	protein serine/threonine/tyrosine kinase activity	2/255	40/16969	0.121092	0.550419	0.523928	2	5605/5608	MAP2K2/MAP2K6
GO:0016877	ligase activity, forming carbon-sulfur bonds	2/255	40/16969	0.121092	0.550419	0.523928	2	28965/84532	SLC27A6/ACSS1
GO:0030020	extracellular matrix structural constituent conferring tensile strength	2/255	41/16969	0.126097	0.550419	0.523928	2	255631/91522	COL24A1/COL23A1
GO:0030331	estrogen receptor binding	2/255	41/16969	0.126097	0.550419	0.523928	2	133522/8648	PPARGC1B/NCOA1
GO:0019842	vitamin binding	4/255	128/16969	0.127207	0.550419	0.523928	4	339896/3141/283208/55214	GADL1/HLCS/P4HA3/P3H2
GO:0016887	ATPase activity	7/255	280/16969	0.130125	0.550419	0.523928	7	493/26154/5890/3801/64241/23499/64240	ATP2B4/ABCA12/RAD51B/KIFC3/ABCG8/MACF1/ABCG5
GO:0001047	core promoter binding	2/255	42/16969	0.13115	0.550419	0.523928	2	7709/4869	ZBTB17/NPM1
GO:0001228	DNA-binding transcription activator activity, RNA polymerase II-specific	9/255	390/16969	0.134648	0.550419	0.523928	9	7709/55810/1961/5326/5079/148979/3054/1871/3172	ZBTB17/FOXJ2/EGR4/PLAGL2/PAX5/GLIS1/HCFC1/E2F3/HNF4A
GO:0038024	cargo receptor activity	3/255	85/16969	0.136022	0.550419	0.523928	3	5169/433/51435	ENPP3/ASGR2/SCARA3
GO:0003777	microtubule motor activity	2/255	43/16969	0.136249	0.550419	0.523928	2	3801/201625	KIFC3/DNAH12
GO:0050840	extracellular matrix binding	2/255	43/16969	0.136249	0.550419	0.523928	2	3675/375790	ITGA3/AGRN
GO:0004497	monooxygenase activity	3/255	86/16969	0.139469	0.550419	0.523928	3	57553/1580/7299	MICAL3/CYP4B1/TYR
GO:0002162	dystroglycan binding	1/255	10/16969	0.140543	0.550419	0.523928	1	375790	AGRN
GO:0004993	G protein-coupled serotonin receptor activity	1/255	10/16969	0.140543	0.550419	0.523928	1	3356	HTR2A
GO:0005522	profilin binding	1/255	10/16969	0.140543	0.550419	0.523928	1	2017	CTTN
GO:0016801	hydrolase activity, acting on ether bonds	1/255	10/16969	0.140543	0.550419	0.523928	1	2053	EPHX2
GO:0030957	Tat protein binding	1/255	10/16969	0.140543	0.550419	0.523928	1	4869	NPM1
GO:0035325	Toll-like receptor binding	1/255	10/16969	0.140543	0.550419	0.523928	1	23643	LY96
GO:0036312	phosphatidylinositol 3-kinase regulatory subunit binding	1/255	10/16969	0.140543	0.550419	0.523928	1	1785	DNM2
GO:0046974	histone methyltransferase activity (H3-K9 specific)	1/255	10/16969	0.140543	0.550419	0.523928	1	63976	PRDM16
GO:0070696	transmembrane receptor protein serine/threonine kinase binding	1/255	10/16969	0.140543	0.550419	0.523928	1	654	BMP6
GO:0099589	serotonin receptor activity	1/255	10/16969	0.140543	0.550419	0.523928	1	3356	HTR2A
GO:0106019	phosphatidylinositol-4,5-bisphosphate phosphatase activity	1/255	10/16969	0.140543	0.550419	0.523928	1	51763	INPP5K
GO:0045309	protein phosphorylated amino acid binding	2/255	44/16969	0.141392	0.550419	0.523928	2	3055/7409	HCK/VAV1
GO:0016874	ligase activity	4/255	134/16969	0.143263	0.550419	0.523928	4	10667/28965/84532/3141	FARS2/SLC27A6/ACSS1/HLCS
GO:0030374	nuclear receptor transcription coactivator activity	2/255	45/16969	0.146576	0.550419	0.523928	2	133522/8648	PPARGC1B/NCOA1
GO:0019887	protein kinase regulator activity	4/255	136/16969	0.148786	0.550419	0.523928	4	51422/5605/4869/57521	PRKAG2/MAP2K2/NPM1/RPTOR
GO:0016407	acetyltransferase activity	3/255	89/16969	0.149986	0.550419	0.523928	3	3054/1103/8648	HCFC1/CHAT/NCOA1
GO:0016705	oxidoreductase activity, acting on paired donors, with incorporation or reduction of molecular oxygen	4/255	137/16969	0.151578	0.550419	0.523928	4	57553/1580/7299/55214	MICAL3/CYP4B1/TYR/P3H2
GO:0004551	nucleotide diphosphatase activity	1/255	11/16969	0.153467	0.550419	0.523928	1	5169	ENPP3
GO:0004652	polynucleotide adenylyltransferase activity	1/255	11/16969	0.153467	0.550419	0.523928	1	55603	TENT5A
GO:0005402	carbohydrate:cation symporter activity	1/255	11/16969	0.153467	0.550419	0.523928	1	57210	SLC45A4
GO:0015295	solute:proton symporter activity	1/255	11/16969	0.153467	0.550419	0.523928	1	57210	SLC45A4
GO:0015923	mannosidase activity	1/255	11/16969	0.153467	0.550419	0.523928	1	57134	MAN1C1
GO:0030955	potassium ion binding	1/255	11/16969	0.153467	0.550419	0.523928	1	3739	KCNA4
GO:0048185	activin binding	1/255	11/16969	0.153467	0.550419	0.523928	1	7049	TGFBR3
GO:0089720	caspase binding	1/255	11/16969	0.153467	0.550419	0.523928	1	59082	CARD18
GO:1901612	cardiolipin binding	1/255	11/16969	0.153467	0.550419	0.523928	1	4833	NME4
GO:0022804	active transmembrane transporter activity	6/255	241/16969	0.156022	0.550419	0.523928	6	493/26154/57210/64241/9123/64240	ATP2B4/ABCA12/SLC45A4/ABCG8/SLC16A3/ABCG5
GO:0004725	protein tyrosine phosphatase activity	3/255	92/16969	0.160748	0.550419	0.523928	3	10076/2139/5792	PTPRU/EYA2/PTPRF
GO:0061134	peptidase regulator activity	5/255	192/16969	0.163429	0.550419	0.523928	5	3697/4018/23198/59082/124857	ITIH1/LPA/PSME4/CARD18/WFIKKN2
GO:0003756	protein disulfide isomerase activity	1/255	12/16969	0.166196	0.550419	0.523928	1	5768	QSOX1
GO:0008242	omega peptidase activity	1/255	12/16969	0.166196	0.550419	0.523928	1	80150	ASRGL1
GO:0016722	oxidoreductase activity, oxidizing metal ions	1/255	12/16969	0.166196	0.550419	0.523928	1	341208	HEPHL1
GO:0016864	intramolecular oxidoreductase activity, transposing S-S bonds	1/255	12/16969	0.166196	0.550419	0.523928	1	5768	QSOX1
GO:0019992	diacylglycerol binding	1/255	12/16969	0.166196	0.550419	0.523928	1	115727	RASGRP4
GO:0030553	cGMP binding	1/255	12/16969	0.166196	0.550419	0.523928	1	50940	PDE11A
GO:0043024	ribosomal small subunit binding	1/255	12/16969	0.166196	0.550419	0.523928	1	4869	NPM1
GO:0047555	3',5'-cyclic-GMP phosphodiesterase activity	1/255	12/16969	0.166196	0.550419	0.523928	1	50940	PDE11A
GO:0050780	dopamine receptor binding	1/255	12/16969	0.166196	0.550419	0.523928	1	1785	DNM2
GO:1990939	ATP-dependent microtubule motor activity	1/255	12/16969	0.166196	0.550419	0.523928	1	3801	KIFC3
GO:0005267	potassium channel activity	3/255	95/16969	0.171737	0.550419	0.523928	3	3763/55151/3739	KCNJ6/TMEM38B/KCNA4
GO:0005085	guanyl-nucleotide exchange factor activity	5/255	196/16969	0.173287	0.550419	0.523928	5	55255/7409/5924/9649/115727	WDR41/VAV1/RASGRF2/RALGPS1/RASGRP4
GO:0005044	scavenger receptor activity	2/255	51/16969	0.178408	0.550419	0.523928	2	5169/51435	ENPP3/SCARA3
GO:0016894	endonuclease activity, active with either ribo- or deoxyribonucleic acids and producing 3'-phosphomonoesters	1/255	13/16969	0.178735	0.550419	0.523928	1	6035	RNASE1
GO:0051010	microtubule plus-end binding	1/255	13/16969	0.178735	0.550419	0.523928	1	8631	SKAP1
GO:0052745	inositol phosphate phosphatase activity	1/255	13/16969	0.178735	0.550419	0.523928	1	51763	INPP5K
GO:0015631	tubulin binding	6/255	252/16969	0.179794	0.550419	0.523928	6	65055/8631/1785/23499/5142/5195	REEP1/SKAP1/DNM2/MACF1/PDE4B/PEX14
GO:0005539	glycosaminoglycan binding	5/255	199/16969	0.180828	0.550419	0.523928	5	375790/4018/146760/7049/5792	AGRN/LPA/RTN4RL1/TGFBR3/PTPRF
GO:0008201	heparin binding	4/255	148/16969	0.183532	0.550419	0.523928	4	4018/146760/7049/5792	LPA/RTN4RL1/TGFBR3/PTPRF
GO:0004402	histone acetyltransferase activity	2/255	52/16969	0.183815	0.550419	0.523928	2	3054/8648	HCFC1/NCOA1
GO:0005070	SH3/SH2 adaptor activity	2/255	52/16969	0.183815	0.550419	0.523928	2	3927/8631	LASP1/SKAP1
GO:0005261	cation channel activity	6/255	254/16969	0.184266	0.550419	0.523928	6	3763/7225/773/79054/55151/3739	KCNJ6/TRPC6/CACNA1A/TRPM8/TMEM38B/KCNA4
GO:0004866	endopeptidase inhibitor activity	4/255	149/16969	0.186542	0.550419	0.523928	4	3697/4018/59082/124857	ITIH1/LPA/CARD18/WFIKKN2
GO:0019905	syntaxin binding	2/255	53/16969	0.189245	0.550419	0.523928	2	773/10815	CACNA1A/CPLX1
GO:0050662	coenzyme binding	6/255	257/16969	0.191057	0.550419	0.523928	6	5768/57553/339896/3141/283208/55214	QSOX1/MICAL3/GADL1/HLCS/P4HA3/P3H2
GO:0000339	RNA cap binding	1/255	14/16969	0.191086	0.550419	0.523928	1	8672	EIF4G3
GO:0008191	metalloendopeptidase inhibitor activity	1/255	14/16969	0.191086	0.550419	0.523928	1	124857	WFIKKN2
GO:0015645	fatty acid ligase activity	1/255	14/16969	0.191086	0.550419	0.523928	1	28965	SLC27A6
GO:0030676	Rac guanyl-nucleotide exchange factor activity	1/255	14/16969	0.191086	0.550419	0.523928	1	7409	VAV1
GO:1901611	phosphatidylglycerol binding	1/255	14/16969	0.191086	0.550419	0.523928	1	4833	NME4
GO:0003707	steroid hormone receptor activity	2/255	54/16969	0.194697	0.550419	0.523928	2	2516/3172	NR5A1/HNF4A
GO:0016667	oxidoreductase activity, acting on a sulfur group of donors	2/255	54/16969	0.194697	0.550419	0.523928	2	5768/285362	QSOX1/SUMF1
GO:0061733	peptide-lysine-N-acetyltransferase activity	2/255	54/16969	0.194697	0.550419	0.523928	2	3054/8648	HCFC1/NCOA1
GO:0001664	G protein-coupled receptor binding	5/255	205/16969	0.196265	0.550419	0.523928	5	2219/65055/26052/1785/51083	FCN1/REEP1/DNM3/DNM2/GAL
GO:0019207	kinase regulator activity	4/255	154/16969	0.201824	0.550419	0.523928	4	51422/5605/4869/57521	PRKAG2/MAP2K2/NPM1/RPTOR
GO:0061135	endopeptidase regulator activity	4/255	154/16969	0.201824	0.550419	0.523928	4	3697/4018/59082/124857	ITIH1/LPA/CARD18/WFIKKN2
GO:0003774	motor activity	3/255	103/16969	0.202003	0.550419	0.523928	3	3801/201625/4645	KIFC3/DNAH12/MYO5B
GO:0005319	lipid transporter activity	3/255	103/16969	0.202003	0.550419	0.523928	3	26154/64241/64240	ABCA12/ABCG8/ABCG5
GO:0008143	poly(A) binding	1/255	15/16969	0.203252	0.550419	0.523928	1	27303	RBMS3
GO:0017160	Ral GTPase binding	1/255	15/16969	0.203252	0.550419	0.523928	1	9649	RALGPS1
GO:0042813	Wnt-activated receptor activity	1/255	15/16969	0.203252	0.550419	0.523928	1	4041	LRP5
GO:0046965	retinoid X receptor binding	1/255	15/16969	0.203252	0.550419	0.523928	1	8648	NCOA1
GO:0048019	receptor antagonist activity	1/255	15/16969	0.203252	0.550419	0.523928	1	124857	WFIKKN2
GO:0050700	CARD domain binding	1/255	15/16969	0.203252	0.550419	0.523928	1	59082	CARD18
GO:0004197	cysteine-type endopeptidase activity	2/255	56/16969	0.205659	0.550419	0.523928	2	59082/9101	CARD18/USP8
GO:0015085	calcium ion transmembrane transporter activity	3/255	105/16969	0.209758	0.550419	0.523928	3	493/773/79054	ATP2B4/CACNA1A/TRPM8
GO:0003712	transcription coregulator activity	10/255	494/16969	0.210878	0.550419	0.523928	10	1045/133522/4869/63976/3054/7695/2516/8648/22882/5195	CDX2/PPARGC1B/NPM1/PRDM16/HCFC1/ZNF136/NR5A1/NCOA1/ZHX2/PEX14
GO:0030414	peptidase inhibitor activity	4/255	157/16969	0.211167	0.550419	0.523928	4	3697/4018/59082/124857	ITIH1/LPA/CARD18/WFIKKN2
GO:0004175	endopeptidase activity	7/255	322/16969	0.211794	0.550419	0.523928	7	440387/4898/3816/4018/59082/9101/5682	CTRB2/NRDC/KLK1/LPA/CARD18/USP8/PSMA1
GO:0022843	voltage-gated cation channel activity	3/255	106/16969	0.213661	0.550419	0.523928	3	3763/773/3739	KCNJ6/CACNA1A/KCNA4
GO:0005201	extracellular matrix structural constituent	4/255	158/16969	0.214309	0.550419	0.523928	4	375790/256158/255631/91522	AGRN/HMCN2/COL24A1/COL23A1
GO:0008236	serine-type peptidase activity	4/255	158/16969	0.214309	0.550419	0.523928	4	440387/3816/4018/5547	CTRB2/KLK1/LPA/PRCP
GO:0000400	four-way junction DNA binding	1/255	16/16969	0.215235	0.550419	0.523928	1	5890	RAD51B
GO:0004675	transmembrane receptor protein serine/threonine kinase activity	1/255	16/16969	0.215235	0.550419	0.523928	1	7049	TGFBR3
GO:0005003	ephrin receptor activity	1/255	16/16969	0.215235	0.550419	0.523928	1	2048	EPHB2
GO:0005242	inward rectifier potassium channel activity	1/255	16/16969	0.215235	0.550419	0.523928	1	3763	KCNJ6
GO:0010485	H4 histone acetyltransferase activity	1/255	16/16969	0.215235	0.550419	0.523928	1	3054	HCFC1
GO:0031420	alkali metal ion binding	1/255	16/16969	0.215235	0.550419	0.523928	1	3739	KCNA4
GO:0033612	receptor serine/threonine kinase binding	1/255	16/16969	0.215235	0.550419	0.523928	1	654	BMP6
GO:0034185	apolipoprotein binding	1/255	16/16969	0.215235	0.550419	0.523928	1	4018	LPA
GO:0043395	heparan sulfate proteoglycan binding	1/255	16/16969	0.215235	0.550419	0.523928	1	375790	AGRN
GO:0001158	enhancer sequence-specific DNA binding	3/255	107/16969	0.217579	0.55353	0.526889	3	1045/619279/2516	CDX2/ZNF704/NR5A1
GO:0033293	monocarboxylic acid binding	2/255	59/16969	0.222219	0.559536	0.532606	2	3141/3172	HLCS/HNF4A
GO:0034212	peptide N-acetyltransferase activity	2/255	59/16969	0.222219	0.559536	0.532606	2	3054/8648	HCFC1/NCOA1
GO:0060090	molecular adaptor activity	5/255	216/16969	0.225679	0.56233	0.535265	5	80176/3927/3054/8631/57521	SPSB1/LASP1/HCFC1/SKAP1/RPTOR
GO:0015079	potassium ion transmembrane transporter activity	3/255	110/16969	0.229421	0.56233	0.535265	3	3763/55151/3739	KCNJ6/TMEM38B/KCNA4
GO:0017171	serine hydrolase activity	4/255	163/16969	0.230205	0.56233	0.535265	4	440387/3816/4018/5547	CTRB2/KLK1/LPA/PRCP
GO:0016922	nuclear receptor binding	1/255	18/16969	0.238667	0.56233	0.535265	1	8648	NCOA1
GO:0005249	voltage-gated potassium channel activity	2/255	62/16969	0.23888	0.56233	0.535265	2	3763/3739	KCNJ6/KCNA4
GO:0048029	monosaccharide binding	2/255	62/16969	0.23888	0.56233	0.535265	2	283208/55214	P4HA3/P3H2
GO:0005178	integrin binding	3/255	113/16969	0.24138	0.56233	0.535265	3	3675/11188/7402	ITGA3/NISCH/UTRN
GO:0001227	DNA-binding transcription repressor activity, RNA polymerase II-specific	5/255	224/16969	0.247846	0.56233	0.535265	5	1045/1869/148979/60468/23040	CDX2/E2F1/GLIS1/BACH2/MYT1L
GO:0016791	phosphatase activity	5/255	224/16969	0.247846	0.56233	0.535265	5	10076/51763/2139/5792/2053	PTPRU/INPP5K/EYA2/PTPRF/EPHX2
GO:0003899	DNA-directed 5'-3' RNA polymerase activity	1/255	19/16969	0.25012	0.56233	0.535265	1	25885	POLR1A
GO:0004653	polypeptide N-acetylgalactosaminyltransferase activity	1/255	19/16969	0.25012	0.56233	0.535265	1	374378	GALNT18
GO:0008327	methyl-CpG binding	1/255	19/16969	0.25012	0.56233	0.535265	1	1045	CDX2
GO:0017075	syntaxin-1 binding	1/255	19/16969	0.25012	0.56233	0.535265	1	10815	CPLX1
GO:0070577	lysine-acetylated histone binding	1/255	19/16969	0.25012	0.56233	0.535265	1	23198	PSME4
GO:0140033	acetylation-dependent protein binding	1/255	19/16969	0.25012	0.56233	0.535265	1	23198	PSME4
GO:0019199	transmembrane receptor protein kinase activity	2/255	65/16969	0.2556	0.56233	0.535265	2	2048/7049	EPHB2/TGFBR3
GO:0003713	transcription coactivator activity	6/255	285/16969	0.258535	0.56233	0.535265	6	133522/4869/63976/3054/2516/8648	PPARGC1B/NPM1/PRDM16/HCFC1/NR5A1/NCOA1
GO:0000149	SNARE binding	2/255	66/16969	0.26118	0.56233	0.535265	2	773/10815	CACNA1A/CPLX1
GO:0001965	G-protein alpha-subunit binding	1/255	20/16969	0.261401	0.56233	0.535265	1	3356	HTR2A
GO:0005160	transforming growth factor beta receptor binding	1/255	20/16969	0.261401	0.56233	0.535265	1	7049	TGFBR3
GO:0008266	poly(U) RNA binding	1/255	20/16969	0.261401	0.56233	0.535265	1	27303	RBMS3
GO:0015662	ATPase activity, coupled to transmembrane movement of ions, phosphorylative mechanism	1/255	20/16969	0.261401	0.56233	0.535265	1	493	ATP2B4
GO:0019200	carbohydrate kinase activity	1/255	20/16969	0.261401	0.56233	0.535265	1	55277	FGGY
GO:0030506	ankyrin binding	1/255	20/16969	0.261401	0.56233	0.535265	1	2318	FLNC
GO:0030515	snoRNA binding	1/255	20/16969	0.261401	0.56233	0.535265	1	55813	UTP6
GO:0030552	cAMP binding	1/255	20/16969	0.261401	0.56233	0.535265	1	5142	PDE4B
GO:0034593	phosphatidylinositol bisphosphate phosphatase activity	1/255	20/16969	0.261401	0.56233	0.535265	1	51763	INPP5K
GO:0050145	nucleoside monophosphate kinase activity	1/255	20/16969	0.261401	0.56233	0.535265	1	1740	DLG2
GO:0050660	flavin adenine dinucleotide binding	2/255	67/16969	0.266762	0.56233	0.535265	2	5768/57553	QSOX1/MICAL3
GO:0001223	transcription coactivator binding	1/255	21/16969	0.272513	0.56233	0.535265	1	7709	ZBTB17
GO:0001871	pattern binding	1/255	21/16969	0.272513	0.56233	0.535265	1	5169	ENPP3
GO:0004298	threonine-type endopeptidase activity	1/255	21/16969	0.272513	0.56233	0.535265	1	5682	PSMA1
GO:0005184	neuropeptide hormone activity	1/255	21/16969	0.272513	0.56233	0.535265	1	51083	GAL
GO:0017134	fibroblast growth factor binding	1/255	21/16969	0.272513	0.56233	0.535265	1	7049	TGFBR3
GO:0030247	polysaccharide binding	1/255	21/16969	0.272513	0.56233	0.535265	1	5169	ENPP3
GO:0030547	receptor inhibitor activity	1/255	21/16969	0.272513	0.56233	0.535265	1	124857	WFIKKN2
GO:0050699	WW domain binding	1/255	21/16969	0.272513	0.56233	0.535265	1	1785	DNM2
GO:0070003	threonine-type peptidase activity	1/255	21/16969	0.272513	0.56233	0.535265	1	5682	PSMA1
GO:0070330	aromatase activity	1/255	21/16969	0.272513	0.56233	0.535265	1	1580	CYP4B1
GO:0070717	poly-purine tract binding	1/255	21/16969	0.272513	0.56233	0.535265	1	27303	RBMS3
GO:0102567	phospholipase A2 activity (consuming 1,2-dipalmitoylphosphatidylcholine)	1/255	21/16969	0.272513	0.56233	0.535265	1	151056	PLB1
GO:0102568	phospholipase A2 activity consuming 1,2-dioleoylphosphatidylethanolamine)	1/255	21/16969	0.272513	0.56233	0.535265	1	151056	PLB1
GO:0019838	growth factor binding	3/255	121/16969	0.273721	0.56233	0.535265	3	4898/7049/124857	NRDC/TGFBR3/WFIKKN2
GO:0035326	enhancer binding	3/255	121/16969	0.273721	0.56233	0.535265	3	1045/619279/2516	CDX2/ZNF704/NR5A1
GO:0000146	microfilament motor activity	1/255	22/16969	0.283459	0.57082	0.543347	1	4645	MYO5B
GO:0008187	poly-pyrimidine tract binding	1/255	22/16969	0.283459	0.57082	0.543347	1	27303	RBMS3
GO:0015175	neutral amino acid transmembrane transporter activity	1/255	22/16969	0.283459	0.57082	0.543347	1	153201	SLC36A2
GO:0043015	gamma-tubulin binding	1/255	22/16969	0.283459	0.57082	0.543347	1	5142	PDE4B
GO:0001540	amyloid-beta binding	2/255	71/16969	0.289071	0.57082	0.543347	2	2048/773	EPHB2/CACNA1A
GO:0000217	DNA secondary structure binding	1/255	23/16969	0.294241	0.57082	0.543347	1	5890	RAD51B
GO:0016702	oxidoreductase activity, acting on single donors with incorporation of molecular oxygen, incorporation of two atoms of oxygen	1/255	23/16969	0.294241	0.57082	0.543347	1	283208	P4HA3
GO:0016712	oxidoreductase activity, acting on paired donors, with incorporation or reduction of molecular oxygen, reduced flavin or flavoprotein as one donor, and incorporation of one atom of oxygen	1/255	23/16969	0.294241	0.57082	0.543347	1	1580	CYP4B1
GO:0030371	translation repressor activity	1/255	23/16969	0.294241	0.57082	0.543347	1	131405	TRIM71
GO:0034062	5'-3' RNA polymerase activity	1/255	23/16969	0.294241	0.57082	0.543347	1	25885	POLR1A
GO:0070412	R-SMAD binding	1/255	23/16969	0.294241	0.57082	0.543347	1	753	LDLRAD4
GO:0071855	neuropeptide receptor binding	1/255	23/16969	0.294241	0.57082	0.543347	1	51083	GAL
GO:0097747	RNA polymerase activity	1/255	23/16969	0.294241	0.57082	0.543347	1	25885	POLR1A
GO:0008080	N-acetyltransferase activity	2/255	72/16969	0.294639	0.57082	0.543347	2	3054/8648	HCFC1/NCOA1
GO:0016247	channel regulator activity	3/255	127/16969	0.298266	0.57082	0.543347	3	493/9379/400986	ATP2B4/NRXN2/ANKRD36C
GO:0004843	thiol-dependent ubiquitin-specific protease activity	2/255	73/16969	0.300201	0.57082	0.543347	2	9101/84132	USP8/USP42
GO:0004867	serine-type endopeptidase inhibitor activity	2/255	73/16969	0.300201	0.57082	0.543347	2	3697/124857	ITIH1/WFIKKN2
GO:0005089	Rho guanyl-nucleotide exchange factor activity	2/255	73/16969	0.300201	0.57082	0.543347	2	7409/5924	VAV1/RASGRF2
GO:0008175	tRNA methyltransferase activity	1/255	24/16969	0.304861	0.57082	0.543347	1	10785	WDR4
GO:0016701	oxidoreductase activity, acting on single donors with incorporation of molecular oxygen	1/255	24/16969	0.304861	0.57082	0.543347	1	283208	P4HA3
GO:0042974	retinoic acid receptor binding	1/255	24/16969	0.304861	0.57082	0.543347	1	8648	NCOA1
GO:0008324	cation transmembrane transporter activity	9/255	484/16969	0.304945	0.57082	0.543347	9	493/153201/3763/7225/773/79054/57210/55151/3739	ATP2B4/SLC36A2/KCNJ6/TRPC6/CACNA1A/TRPM8/SLC45A4/TMEM38B/KCNA4
GO:0001618	virus receptor activity	2/255	74/16969	0.305755	0.57082	0.543347	2	6504/3356	SLAMF1/HTR2A
GO:0104005	hijacked molecular function	2/255	74/16969	0.305755	0.57082	0.543347	2	6504/3356	SLAMF1/HTR2A
GO:0017091	AU-rich element binding	1/255	25/16969	0.315322	0.579862	0.551953	1	27303	RBMS3
GO:0035925	mRNA 3'-UTR AU-rich region binding	1/255	25/16969	0.315322	0.579862	0.551953	1	27303	RBMS3
GO:0052866	phosphatidylinositol phosphate phosphatase activity	1/255	25/16969	0.315322	0.579862	0.551953	1	51763	INPP5K
GO:0080025	phosphatidylinositol-3,5-bisphosphate binding	1/255	25/16969	0.315322	0.579862	0.551953	1	157807	CLVS1
GO:0051219	phosphoprotein binding	2/255	76/16969	0.316838	0.580476	0.552538	2	3055/7409	HCK/VAV1
GO:0004252	serine-type endopeptidase activity	3/255	133/16969	0.32293	0.581189	0.553217	3	440387/3816/4018	CTRB2/KLK1/LPA
GO:0004674	protein serine/threonine kinase activity	7/255	371/16969	0.324514	0.581189	0.553217	7	22853/51422/1456/5605/7049/5608/65975	LMTK2/PRKAG2/CSNK1G3/MAP2K2/TGFBR3/MAP2K6/STK33
GO:0004623	phospholipase A2 activity	1/255	26/16969	0.325626	0.581189	0.553217	1	151056	PLB1
GO:0008028	monocarboxylic acid transmembrane transporter activity	1/255	26/16969	0.325626	0.581189	0.553217	1	9123	SLC16A3
GO:0008066	glutamate receptor activity	1/255	26/16969	0.325626	0.581189	0.553217	1	2911	GRM1
GO:0070566	adenylyltransferase activity	1/255	26/16969	0.325626	0.581189	0.553217	1	55603	TENT5A
GO:0004896	cytokine receptor activity	2/255	78/16969	0.327881	0.581189	0.553217	2	58985/84818	IL22RA1/IL17RC
GO:0008013	beta-catenin binding	2/255	78/16969	0.327881	0.581189	0.553217	2	10076/29119	PTPRU/CTNNA3
GO:0035591	signaling adaptor activity	2/255	78/16969	0.327881	0.581189	0.553217	2	3927/8631	LASP1/SKAP1
GO:0008227	G protein-coupled amine receptor activity	1/255	27/16969	0.335776	0.584631	0.556493	1	3356	HTR2A
GO:0019825	oxygen binding	1/255	27/16969	0.335776	0.584631	0.556493	1	1580	CYP4B1
GO:0030507	spectrin binding	1/255	27/16969	0.335776	0.584631	0.556493	1	10083	USH1C
GO:0043325	phosphatidylinositol-3,4-bisphosphate binding	1/255	27/16969	0.335776	0.584631	0.556493	1	9873	FCHSD2
GO:0043539	protein serine/threonine kinase activator activity	1/255	27/16969	0.335776	0.584631	0.556493	1	5605	MAP2K2
GO:0042562	hormone binding	2/255	81/16969	0.344352	0.591549	0.563078	2	4898/3062	NRDC/HCRTR2
GO:0005504	fatty acid binding	1/255	28/16969	0.345773	0.591549	0.563078	1	3172	HNF4A
GO:0015144	carbohydrate transmembrane transporter activity	1/255	28/16969	0.345773	0.591549	0.563078	1	57210	SLC45A4
GO:0017080	sodium channel regulator activity	1/255	28/16969	0.345773	0.591549	0.563078	1	493	ATP2B4
GO:0043548	phosphatidylinositol 3-kinase binding	1/255	28/16969	0.345773	0.591549	0.563078	1	1785	DNM2
GO:0022890	inorganic cation transmembrane transporter activity	8/255	444/16969	0.351505	0.599266	0.570424	8	493/3763/7225/773/79054/57210/55151/3739	ATP2B4/KCNJ6/TRPC6/CACNA1A/TRPM8/SLC45A4/TMEM38B/KCNA4
GO:0051059	NF-kappaB binding	1/255	29/16969	0.355621	0.604186	0.575107	1	4869	NPM1
GO:0071889	14-3-3 protein binding	1/255	30/16969	0.365321	0.617724	0.587993	1	57521	RPTOR
GO:0051213	dioxygenase activity	2/255	85/16969	0.366105	0.617724	0.587993	2	283208/55214	P4HA3/P3H2
GO:0005506	iron ion binding	3/255	144/16969	0.368105	0.618971	0.58918	3	1580/283208/55214	CYP4B1/P4HA3/P3H2
GO:0003714	transcription corepressor activity	4/255	205/16969	0.371044	0.620433	0.590571	4	1045/7695/22882/5195	CDX2/ZNF136/ZHX2/PEX14
GO:0030594	neurotransmitter receptor activity	2/255	86/16969	0.371501	0.620433	0.590571	2	2911/3356	GRM1/HTR2A
GO:0005216	ion channel activity	6/255	329/16969	0.37401	0.620965	0.591078	6	3763/7225/773/79054/55151/3739	KCNJ6/TRPC6/CACNA1A/TRPM8/TMEM38B/KCNA4
GO:0015179	L-amino acid transmembrane transporter activity	1/255	31/16969	0.374875	0.620965	0.591078	1	153201	SLC36A2
GO:0000980	RNA polymerase II distal enhancer sequence-specific DNA binding	2/255	87/16969	0.376879	0.620965	0.591078	2	1045/2516	CDX2/NR5A1
GO:0036459	thiol-dependent ubiquitinyl hydrolase activity	2/255	87/16969	0.376879	0.620965	0.591078	2	9101/84132	USP8/USP42
GO:0035258	steroid hormone receptor binding	2/255	88/16969	0.382238	0.625011	0.594929	2	133522/8648	PPARGC1B/NCOA1
GO:0101005	ubiquitinyl hydrolase activity	2/255	88/16969	0.382238	0.625011	0.594929	2	9101/84132	USP8/USP42
GO:0008376	acetylgalactosaminyltransferase activity	1/255	32/16969	0.384286	0.625011	0.594929	1	374378	GALNT18
GO:0008234	cysteine-type peptidase activity	3/255	148/16969	0.384426	0.625011	0.594929	3	59082/9101/84132	CARD18/USP8/USP42
GO:0005262	calcium channel activity	2/255	89/16969	0.387577	0.62536	0.595262	2	773/79054	CACNA1A/TRPM8
GO:0016410	N-acyltransferase activity	2/255	90/16969	0.392896	0.62536	0.595262	2	3054/8648	HCFC1/NCOA1
GO:0016709	oxidoreductase activity, acting on paired donors, with incorporation or reduction of molecular oxygen, NAD(P)H as one donor, and incorporation of one atom of oxygen	1/255	33/16969	0.393556	0.62536	0.595262	1	57553	MICAL3
GO:0016776	phosphotransferase activity, phosphate group as acceptor	1/255	33/16969	0.393556	0.62536	0.595262	1	1740	DLG2
GO:0016790	thiolester hydrolase activity	1/255	33/16969	0.393556	0.62536	0.595262	1	25953	PNKD
GO:0016831	carboxy-lyase activity	1/255	33/16969	0.393556	0.62536	0.595262	1	339896	GADL1
GO:0017112	Rab guanyl-nucleotide exchange factor activity	1/255	33/16969	0.393556	0.62536	0.595262	1	55255	WDR41
GO:0046873	metal ion transmembrane transporter activity	6/255	337/16969	0.395473	0.626379	0.596231	6	493/3763/773/79054/55151/3739	ATP2B4/KCNJ6/CACNA1A/TRPM8/TMEM38B/KCNA4
GO:0022838	substrate-specific channel activity	6/255	338/16969	0.398156	0.6286	0.598345	6	3763/7225/773/79054/55151/3739	KCNJ6/TRPC6/CACNA1A/TRPM8/TMEM38B/KCNA4
GO:0016620	oxidoreductase activity, acting on the aldehyde or oxo group of donors, NAD or NADP as acceptor	1/255	34/16969	0.402687	0.629706	0.599398	1	7915	ALDH5A1
GO:0098960	postsynaptic neurotransmitter receptor activity	1/255	34/16969	0.402687	0.629706	0.599398	1	2911	GRM1
GO:0001786	phosphatidylserine binding	1/255	35/16969	0.411681	0.629706	0.599398	1	575	ADGRB1
GO:0004812	aminoacyl-tRNA ligase activity	1/255	35/16969	0.411681	0.629706	0.599398	1	10667	FARS2
GO:0008200	ion channel inhibitor activity	1/255	35/16969	0.411681	0.629706	0.599398	1	400986	ANKRD36C
GO:0016875	ligase activity, forming carbon-oxygen bonds	1/255	35/16969	0.411681	0.629706	0.599398	1	10667	FARS2
GO:0030276	clathrin binding	1/255	35/16969	0.411681	0.629706	0.599398	1	7225	TRPC6
GO:0042165	neurotransmitter binding	1/255	35/16969	0.411681	0.629706	0.599398	1	3356	HTR2A
GO:0042169	SH2 domain binding	1/255	35/16969	0.411681	0.629706	0.599398	1	8631	SKAP1
GO:0043531	ADP binding	1/255	35/16969	0.411681	0.629706	0.599398	1	51422	PRKAG2
GO:0016248	channel inhibitor activity	1/255	36/16969	0.420541	0.631355	0.600968	1	400986	ANKRD36C
GO:0016504	peptidase activator activity	1/255	36/16969	0.420541	0.631355	0.600968	1	23198	PSME4
GO:0019205	nucleobase-containing compound kinase activity	1/255	36/16969	0.420541	0.631355	0.600968	1	1740	DLG2
GO:1901618	organic hydroxy compound transmembrane transporter activity	1/255	36/16969	0.420541	0.631355	0.600968	1	9123	SLC16A3
GO:0004721	phosphoprotein phosphatase activity	3/255	157/16969	0.42076	0.631355	0.600968	3	10076/2139/5792	PTPRU/EYA2/PTPRF
GO:1902936	phosphatidylinositol bisphosphate binding	2/255	96/16969	0.424352	0.631355	0.600968	2	157807/9873	CLVS1/FCHSD2
GO:0005244	voltage-gated ion channel activity	3/255	158/16969	0.424756	0.631355	0.600968	3	3763/773/3739	KCNJ6/CACNA1A/KCNA4
GO:0022832	voltage-gated channel activity	3/255	158/16969	0.424756	0.631355	0.600968	3	3763/773/3739	KCNJ6/CACNA1A/KCNA4
GO:0005245	voltage-gated calcium channel activity	1/255	37/16969	0.429267	0.631355	0.600968	1	773	CACNA1A
GO:0019829	cation-transporting ATPase activity	1/255	37/16969	0.429267	0.631355	0.600968	1	493	ATP2B4
GO:0019783	ubiquitin-like protein-specific protease activity	2/255	97/16969	0.429513	0.631355	0.600968	2	9101/84132	USP8/USP42
GO:0046943	carboxylic acid transmembrane transporter activity	2/255	98/16969	0.43465	0.631355	0.600968	2	153201/9123	SLC36A2/SLC16A3
GO:0001221	transcription cofactor binding	1/255	38/16969	0.437862	0.631355	0.600968	1	7709	ZBTB17
GO:0005547	phosphatidylinositol-3,4,5-trisphosphate binding	1/255	38/16969	0.437862	0.631355	0.600968	1	9873	FCHSD2
GO:0016860	intramolecular oxidoreductase activity	1/255	38/16969	0.437862	0.631355	0.600968	1	5768	QSOX1
GO:0017046	peptide hormone binding	1/255	38/16969	0.437862	0.631355	0.600968	1	3062	HCRTR2
GO:0022853	active ion transmembrane transporter activity	1/255	38/16969	0.437862	0.631355	0.600968	1	493	ATP2B4
GO:0042625	ATPase coupled ion transmembrane transporter activity	1/255	38/16969	0.437862	0.631355	0.600968	1	493	ATP2B4
GO:0048487	beta-tubulin binding	1/255	38/16969	0.437862	0.631355	0.600968	1	5195	PEX14
GO:0005342	organic acid transmembrane transporter activity	2/255	99/16969	0.439762	0.631355	0.600968	2	153201/9123	SLC36A2/SLC16A3
GO:0140101	catalytic activity, acting on a tRNA	2/255	99/16969	0.439762	0.631355	0.600968	2	10667/10785	FARS2/WDR4
GO:0008047	enzyme activator activity	7/255	419/16969	0.442123	0.632894	0.602433	7	51422/5605/23198/9901/57521/7813/57568	PRKAG2/MAP2K2/PSME4/SRGAP3/RPTOR/EVI5/SIPA1L2
GO:0016903	oxidoreductase activity, acting on the aldehyde or oxo group of donors	1/255	39/16969	0.446329	0.637056	0.606395	1	7915	ALDH5A1
GO:0005246	calcium channel regulator activity	1/255	40/16969	0.454668	0.6415	0.610625	1	9379	NRXN2
GO:0016706	oxidoreductase activity, acting on paired donors, with incorporation or reduction of molecular oxygen, 2-oxoglutarate as one donor, and incorporation of one atom each of oxygen into both donors	1/255	40/16969	0.454668	0.6415	0.610625	1	55214	P3H2
GO:0016879	ligase activity, forming carbon-nitrogen bonds	1/255	40/16969	0.454668	0.6415	0.610625	1	3141	HLCS
GO:0019894	kinesin binding	1/255	40/16969	0.454668	0.6415	0.610625	1	85300	ATCAY
GO:0016779	nucleotidyltransferase activity	2/255	103/16969	0.459955	0.646697	0.615571	2	55603/25885	TENT5A/POLR1A
GO:0004177	aminopeptidase activity	1/255	41/16969	0.462882	0.646697	0.615571	1	4012	LNPEP
GO:0005516	calmodulin binding	3/255	168/16969	0.464148	0.646697	0.615571	3	493/5924/4645	ATP2B4/RASGRF2/MYO5B
GO:0005543	phospholipid binding	6/255	363/16969	0.464759	0.646697	0.615571	6	4833/157807/11188/575/2516/9873	NME4/CLVS1/NISCH/ADGRB1/NR5A1/FCHSD2
GO:0099106	ion channel regulator activity	2/255	104/16969	0.464937	0.646697	0.615571	2	9379/400986	NRXN2/ANKRD36C
GO:0000993	RNA polymerase II complex binding	1/255	42/16969	0.470973	0.653202	0.621764	1	57654	UVSSA
GO:0046982	protein heterodimerization activity	8/255	497/16969	0.472274	0.653202	0.621764	8	3675/580/654/4869/64241/7299/22882/64240	ITGA3/BARD1/BMP6/NPM1/ABCG8/TYR/ZHX2/ABCG5
GO:0018024	histone-lysine N-methyltransferase activity	1/255	43/16969	0.478943	0.659815	0.628058	1	63976	PRDM16
GO:0015267	channel activity	6/255	370/16969	0.483114	0.659815	0.628058	6	3763/7225/773/79054/55151/3739	KCNJ6/TRPC6/CACNA1A/TRPM8/TMEM38B/KCNA4
GO:0022803	passive transmembrane transporter activity	6/255	371/16969	0.485721	0.659815	0.628058	6	3763/7225/773/79054/55151/3739	KCNJ6/TRPC6/CACNA1A/TRPM8/TMEM38B/KCNA4
GO:0008374	O-acyltransferase activity	1/255	44/16969	0.486793	0.659815	0.628058	1	1103	CHAT
GO:0030170	pyridoxal phosphate binding	1/255	44/16969	0.486793	0.659815	0.628058	1	339896	GADL1
GO:0050681	androgen receptor binding	1/255	44/16969	0.486793	0.659815	0.628058	1	8648	NCOA1
GO:0048037	cofactor binding	7/255	438/16969	0.488204	0.659815	0.628058	7	5768/57553/1580/339896/3141/283208/55214	QSOX1/MICAL3/CYP4B1/GADL1/HLCS/P4HA3/P3H2
GO:0047485	protein N-terminus binding	2/255	109/16969	0.489434	0.659815	0.628058	2	8648/5195	NCOA1/PEX14
GO:0003954	NADH dehydrogenase activity	1/255	45/16969	0.494525	0.659815	0.628058	1	4724	NDUFS4
GO:0008137	NADH dehydrogenase (ubiquinone) activity	1/255	45/16969	0.494525	0.659815	0.628058	1	4724	NDUFS4
GO:0008375	acetylglucosaminyltransferase activity	1/255	45/16969	0.494525	0.659815	0.628058	1	2651	GCNT2
GO:0050136	NADH dehydrogenase (quinone) activity	1/255	45/16969	0.494525	0.659815	0.628058	1	4724	NDUFS4
GO:0070279	vitamin B6 binding	1/255	45/16969	0.494525	0.659815	0.628058	1	339896	GADL1
GO:0004879	nuclear receptor activity	1/255	46/16969	0.502141	0.664559	0.632574	1	2516	NR5A1
GO:0005080	protein kinase C binding	1/255	46/16969	0.502141	0.664559	0.632574	1	11155	LDB3
GO:0098531	transcription factor activity, direct ligand regulated sequence-specific DNA binding	1/255	46/16969	0.502141	0.664559	0.632574	1	2516	NR5A1
GO:0015293	symporter activity	2/255	112/16969	0.503793	0.664953	0.632949	2	57210/9123	SLC45A4/SLC16A3
GO:0001085	RNA polymerase II transcription factor binding	2/255	113/16969	0.508521	0.669077	0.636875	2	10459/3172	MAD2L2/HNF4A
GO:0000049	tRNA binding	1/255	47/16969	0.509643	0.669077	0.636875	1	10667	FARS2
GO:0008146	sulfotransferase activity	1/255	48/16969	0.517033	0.669823	0.637585	1	10090	UST
GO:0008173	RNA methyltransferase activity	1/255	48/16969	0.517033	0.669823	0.637585	1	10785	WDR4
GO:0043175	RNA polymerase core enzyme binding	1/255	48/16969	0.517033	0.669823	0.637585	1	57654	UVSSA
GO:0045182	translation regulator activity	1/255	48/16969	0.517033	0.669823	0.637585	1	131405	TRIM71
GO:0070405	ammonium ion binding	1/255	48/16969	0.517033	0.669823	0.637585	1	3356	HTR2A
GO:0044325	ion channel binding	2/255	116/16969	0.522529	0.673918	0.641483	2	9699/5142	RIMS2/PDE4B
GO:0004714	transmembrane receptor protein tyrosine kinase activity	1/255	49/16969	0.524311	0.673918	0.641483	1	2048	EPHB2
GO:0016830	carbon-carbon lyase activity	1/255	49/16969	0.524311	0.673918	0.641483	1	339896	GADL1
GO:0016747	transferase activity, transferring acyl groups other than amino-acyl groups	3/255	187/16969	0.53547	0.686464	0.653425	3	3054/1103/8648	HCFC1/CHAT/NCOA1
GO:0048365	Rac GTPase binding	1/255	51/16969	0.538541	0.688604	0.655462	1	7409	VAV1
GO:0016757	transferase activity, transferring glycosyl groups	4/255	257/16969	0.541758	0.690307	0.657082	4	374378/2651/8869/29906	GALNT18/GCNT2/ST3GAL5/ST8SIA5
GO:0002020	protease binding	2/255	121/16969	0.545274	0.690307	0.657082	2	3675/59082	ITGA3/CARD18
GO:0004521	endoribonuclease activity	1/255	52/16969	0.545497	0.690307	0.657082	1	6035	RNASE1
GO:0042054	histone methyltransferase activity	1/255	52/16969	0.545497	0.690307	0.657082	1	63976	PRDM16
GO:0004869	cysteine-type endopeptidase inhibitor activity	1/255	53/16969	0.552348	0.697179	0.663625	1	59082	CARD18
GO:0019001	guanyl nucleotide binding	5/255	331/16969	0.557927	0.70062	0.666899	5	50940/115827/26052/1785/57111	PDE11A/RAB3C/DNM3/DNM2/RAB25
GO:0032561	guanyl ribonucleotide binding	5/255	331/16969	0.557927	0.70062	0.666899	5	50940/115827/26052/1785/57111	PDE11A/RAB3C/DNM3/DNM2/RAB25
GO:0015171	amino acid transmembrane transporter activity	1/255	55/16969	0.565743	0.708622	0.674516	1	153201	SLC36A2
GO:0015077	monovalent inorganic cation transmembrane transporter activity	4/255	266/16969	0.569007	0.709092	0.674964	4	3763/57210/55151/3739	KCNJ6/SLC45A4/TMEM38B/KCNA4
GO:0033218	amide binding	4/255	266/16969	0.569007	0.709092	0.674964	4	2048/3062/773/3141	EPHB2/HCRTR2/CACNA1A/HLCS
GO:0043621	protein self-association	1/255	56/16969	0.57229	0.711378	0.67714	1	85358	SHANK3
GO:0140098	catalytic activity, acting on RNA	4/255	268/16969	0.57494	0.712867	0.678558	4	6035/10667/25885/10785	RNASE1/FARS2/POLR1A/WDR4
GO:0016279	protein-lysine N-methyltransferase activity	1/255	57/16969	0.578738	0.713971	0.679608	1	63976	PRDM16
GO:0016655	oxidoreductase activity, acting on NAD(P)H, quinone or similar compound as acceptor	1/255	57/16969	0.578738	0.713971	0.679608	1	4724	NDUFS4
GO:0016278	lysine N-methyltransferase activity	1/255	58/16969	0.58509	0.718198	0.683632	1	63976	PRDM16
GO:0016811	hydrolase activity, acting on carbon-nitrogen (but not peptide) bonds, in linear amides	1/255	58/16969	0.58509	0.718198	0.683632	1	80150	ASRGL1
GO:0005096	GTPase activator activity	3/255	203/16969	0.591178	0.722018	0.687268	3	9901/7813/57568	SRGAP3/EVI5/SIPA1L2
GO:0015238	drug transmembrane transporter activity	1/255	59/16969	0.591347	0.722018	0.687268	1	153201	SLC36A2
GO:0019903	protein phosphatase binding	2/255	132/16969	0.592614	0.722018	0.687268	2	493/8631	ATP2B4/SKAP1
GO:0001098	basal transcription machinery binding	1/255	60/16969	0.597509	0.724388	0.689523	1	57654	UVSSA
GO:0001099	basal RNA polymerase II transcription machinery binding	1/255	60/16969	0.597509	0.724388	0.689523	1	57654	UVSSA
GO:0005518	collagen binding	1/255	61/16969	0.603579	0.729944	0.694812	1	3675	ITGA3
GO:0008757	S-adenosylmethionine-dependent methyltransferase activity	2/255	136/16969	0.608896	0.734565	0.699211	2	63976/10785	PRDM16/WDR4
GO:0016782	transferase activity, transferring sulfur-containing groups	1/255	63/16969	0.615446	0.738716	0.703162	1	10090	UST
GO:0070063	RNA polymerase binding	1/255	63/16969	0.615446	0.738716	0.703162	1	57654	UVSSA
GO:0008194	UDP-glycosyltransferase activity	2/255	138/16969	0.616851	0.738716	0.703162	2	374378/2651	GALNT18/GCNT2
GO:0008514	organic anion transmembrane transporter activity	2/255	139/16969	0.620781	0.741614	0.705921	2	153201/9123	SLC36A2/SLC16A3
GO:0002039	p53 binding	1/255	65/16969	0.62696	0.745369	0.709495	1	151126	ZNF385B
GO:0072341	modified amino acid binding	1/255	65/16969	0.62696	0.745369	0.709495	1	575	ADGRB1
GO:0042277	peptide binding	3/255	215/16969	0.630039	0.746005	0.7101	3	2048/3062/773	EPHB2/HCRTR2/CACNA1A
GO:1901981	phosphatidylinositol phosphate binding	2/255	143/16969	0.636194	0.746005	0.7101	2	157807/9873	CLVS1/FCHSD2
GO:0016746	transferase activity, transferring acyl groups	3/255	217/16969	0.636264	0.746005	0.7101	3	3054/1103/8648	HCFC1/CHAT/NCOA1
GO:0035091	phosphatidylinositol binding	3/255	217/16969	0.636264	0.746005	0.7101	3	157807/11188/9873	CLVS1/NISCH/FCHSD2
GO:0003730	mRNA 3'-UTR binding	1/255	67/16969	0.63813	0.746005	0.7101	1	27303	RBMS3
GO:0004527	exonuclease activity	1/255	67/16969	0.63813	0.746005	0.7101	1	5169	ENPP3
GO:0008135	translation factor activity, RNA binding	1/255	67/16969	0.63813	0.746005	0.7101	1	8672	EIF4G3
GO:0003727	single-stranded RNA binding	1/255	68/16969	0.64359	0.7506	0.714474	1	27303	RBMS3
GO:0003682	chromatin binding	6/255	437/16969	0.645239	0.75074	0.714608	6	22893/3054/84629/2516/25885/8648	BAHD1/HCFC1/TNRC18/NR5A1/POLR1A/NCOA1
GO:0017048	Rho GTPase binding	2/255	146/16969	0.647429	0.751508	0.715338	2	7409/5924	VAV1/RASGRF2
GO:0008083	growth factor activity	2/255	147/16969	0.651113	0.752227	0.716023	2	2662/654	GDF10/BMP6
GO:0035257	nuclear hormone receptor binding	2/255	147/16969	0.651113	0.752227	0.716023	2	133522/8648	PPARGC1B/NCOA1
GO:0015078	proton transmembrane transporter activity	1/255	70/16969	0.654264	0.752327	0.716118	1	57210	SLC45A4
GO:0015294	solute:cation symporter activity	1/255	70/16969	0.654264	0.752327	0.716118	1	57210	SLC45A4
GO:0003924	GTPase activity	3/255	224/16969	0.657473	0.754251	0.717949	3	115827/26052/1785	RAB3C/DNM3/DNM2
GO:0043178	alcohol binding	1/255	71/16969	0.659481	0.75479	0.718463	1	7225	TRPC6
GO:0008094	DNA-dependent ATPase activity	1/255	72/16969	0.66462	0.758903	0.722377	1	5890	RAD51B
GO:0008237	metallopeptidase activity	2/255	153/16969	0.672577	0.766207	0.72933	2	4898/4012	NRDC/LNPEP
GO:0000987	proximal promoter sequence-specific DNA binding	6/255	452/16969	0.677098	0.769572	0.732533	6	7709/55810/5079/1869/1871/3172	ZBTB17/FOXJ2/PAX5/E2F1/E2F3/HNF4A
GO:0030695	GTPase regulator activity	3/255	235/16969	0.688984	0.779691	0.742165	3	9901/7813/57568	SRGAP3/EVI5/SIPA1L2
GO:0051117	ATPase binding	1/255	77/16969	0.689177	0.779691	0.742165	1	7225	TRPC6
GO:0005525	GTP binding	4/255	313/16969	0.695391	0.784913	0.747135	4	115827/26052/1785/57111	RAB3C/DNM3/DNM2/RAB25
GO:0008276	protein methyltransferase activity	1/255	80/16969	0.703043	0.791729	0.753624	1	63976	PRDM16
GO:0032550	purine ribonucleoside binding	4/255	318/16969	0.707151	0.794534	0.756293	4	115827/26052/1785/57111	RAB3C/DNM3/DNM2/RAB25
GO:0004553	hydrolase activity, hydrolyzing O-glycosyl compounds	1/255	82/16969	0.711942	0.795733	0.757434	1	57134	MAN1C1
GO:0001883	purine nucleoside binding	4/255	321/16969	0.714049	0.795733	0.757434	4	115827/26052/1785/57111	RAB3C/DNM3/DNM2/RAB25
GO:0004620	phospholipase activity	1/255	83/16969	0.716292	0.795733	0.757434	1	151056	PLB1
GO:0051082	unfolded protein binding	1/255	83/16969	0.716292	0.795733	0.757434	1	4869	NPM1
GO:0032549	ribonucleoside binding	4/255	322/16969	0.716321	0.795733	0.757434	4	115827/26052/1785/57111	RAB3C/DNM3/DNM2/RAB25
GO:0016829	lyase activity	2/255	168/16969	0.721571	0.799754	0.761263	2	6035/339896	RNASE1/GADL1
GO:0051427	hormone receptor binding	2/255	170/16969	0.727616	0.802106	0.763501	2	133522/8648	PPARGC1B/NCOA1
GO:0008170	N-methyltransferase activity	1/255	86/16969	0.728953	0.802106	0.763501	1	63976	PRDM16
GO:0004518	nuclease activity	2/255	171/16969	0.730597	0.802106	0.763501	2	6035/5169	RNASE1/ENPP3
GO:0001882	nucleoside binding	4/255	329/16969	0.73186	0.802106	0.763501	4	115827/26052/1785/57111	RAB3C/DNM3/DNM2/RAB25
GO:0019787	ubiquitin-like protein transferase activity	4/255	329/16969	0.73186	0.802106	0.763501	4	131405/580/83734/55182	TRIM71/BARD1/ATG10/RNF220
GO:0015291	secondary active transmembrane transporter activity	2/255	172/16969	0.73355	0.802167	0.763559	2	57210/9123	SLC45A4/SLC16A3
GO:0042393	histone binding	2/255	174/16969	0.739374	0.806739	0.767911	2	23198/4869	PSME4/NPM1
GO:0004222	metalloendopeptidase activity	1/255	89/16969	0.741051	0.806776	0.767946	1	4898	NRDC
GO:0003697	single-stranded DNA binding	1/255	90/16969	0.744963	0.80924	0.770292	1	5890	RAD51B
GO:0019902	phosphatase binding	2/255	177/16969	0.747907	0.809842	0.770865	2	493/8631	ATP2B4/SKAP1
GO:0099094	ligand-gated cation channel activity	1/255	91/16969	0.748816	0.809842	0.770865	1	3763	KCNJ6
GO:0004540	ribonuclease activity	1/255	94/16969	0.76003	0.820164	0.78069	1	6035	RNASE1
GO:0016651	oxidoreductase activity, acting on NAD(P)H	1/255	96/16969	0.767228	0.820903	0.781393	1	4724	NDUFS4
GO:0022839	ion gated channel activity	3/255	267/16969	0.768223	0.820903	0.781393	3	3763/773/3739	KCNJ6/CACNA1A/KCNA4
GO:0060589	nucleoside-triphosphatase regulator activity	3/255	267/16969	0.768223	0.820903	0.781393	3	9901/7813/57568	SRGAP3/EVI5/SIPA1L2
GO:0030545	receptor regulator activity	5/255	425/16969	0.769002	0.820903	0.781393	5	2662/654/51083/124857/112744	GDF10/BMP6/GAL/WFIKKN2/IL17F
GO:0022836	gated channel activity	3/255	268/16969	0.770411	0.820903	0.781393	3	3763/773/3739	KCNJ6/CACNA1A/KCNA4
GO:0016810	hydrolase activity, acting on carbon-nitrogen (but not peptide) bonds	1/255	97/16969	0.770746	0.820903	0.781393	1	80150	ASRGL1
GO:0016298	lipase activity	1/255	100/16969	0.780985	0.830008	0.79006	1	151056	PLB1
GO:0008168	methyltransferase activity	2/255	191/16969	0.784623	0.832073	0.792026	2	63976/10785	PRDM16/WDR4
GO:0005179	hormone activity	1/255	103/16969	0.790768	0.83613	0.795888	1	51083	GAL
GO:0016758	transferase activity, transferring hexosyl groups	2/255	194/16969	0.791855	0.83613	0.795888	2	374378/2651	GALNT18/GCNT2
GO:0016798	hydrolase activity, acting on glycosyl bonds	1/255	104/16969	0.793932	0.836524	0.796263	1	57134	MAN1C1
GO:0004519	endonuclease activity	1/255	105/16969	0.797047	0.838009	0.797676	1	6035	RNASE1
GO:0020037	heme binding	1/255	106/16969	0.800116	0.839438	0.799036	1	1580	CYP4B1
GO:0043021	ribonucleoprotein complex binding	1/255	107/16969	0.803139	0.840813	0.800345	1	4869	NPM1
GO:0016741	transferase activity, transferring one-carbon groups	2/255	201/16969	0.807903	0.844	0.803379	2	63976/10785	PRDM16/WDR4
GO:0015276	ligand-gated ion channel activity	1/255	114/16969	0.82306	0.856191	0.814983	1	3763	KCNJ6
GO:0022834	ligand-gated channel activity	1/255	114/16969	0.82306	0.856191	0.814983	1	3763	KCNJ6
GO:0000287	magnesium ion binding	2/255	209/16969	0.824891	0.856276	0.815064	2	2139/2053	EYA2/EPHX2
GO:0005126	cytokine receptor binding	2/255	210/16969	0.826917	0.856276	0.815064	2	7049/112744	TGFBR3/IL17F
GO:0046906	tetrapyrrole binding	1/255	116/16969	0.828373	0.856276	0.815064	1	1580	CYP4B1
GO:0052689	carboxylic ester hydrolase activity	1/255	120/16969	0.838528	0.864829	0.823206	1	151056	PLB1
GO:0004842	ubiquitin-protein transferase activity	3/255	305/16969	0.84017	0.864829	0.823206	3	131405/580/55182	TRIM71/BARD1/RNF220
GO:0016853	isomerase activity	1/255	122/16969	0.843379	0.866316	0.824621	1	5768	QSOX1
GO:0048018	receptor ligand activity	4/255	397/16969	0.850914	0.872231	0.830251	4	2662/654/51083/112744	GDF10/BMP6/GAL/IL17F
GO:0004386	helicase activity	1/255	128/16969	0.857077	0.876719	0.834523	1	55661	DDX27
GO:0140030	modification-dependent protein binding	1/255	135/16969	0.871557	0.889677	0.846857	1	23198	PSME4
GO:0008509	anion transmembrane transporter activity	2/255	240/16969	0.878676	0.893727	0.850713	2	153201/9123	SLC36A2/SLC16A3
GO:0061630	ubiquitin protein ligase activity	1/255	139/16969	0.879166	0.893727	0.850713	1	55182	RNF220
GO:0061659	ubiquitin-like protein ligase activity	1/255	145/16969	0.889744	0.902612	0.85917	1	55182	RNF220
GO:0000978	RNA polymerase II proximal promoter sequence-specific DNA binding	4/255	432/16969	0.892474	0.903515	0.860029	4	7709/55810/5079/3172	ZBTB17/FOXJ2/PAX5/HNF4A
GO:0003823	antigen binding	1/255	150/16969	0.897851	0.907088	0.863431	1	6504	SLAMF1
GO:0005125	cytokine activity	1/255	154/16969	0.903907	0.911332	0.86747	1	112744	IL17F
GO:0004984	olfactory receptor activity	1/255	164/16969	0.917528	0.923168	0.878737	1	390429	OR4N2
GO:0008022	protein C-terminus binding	1/255	186/16969	0.941099	0.944948	0.899468	1	85358	SHANK3
GO:0044389	ubiquitin-like protein ligase binding	1/255	286/16969	0.987317	0.989332	0.941716	1	9146	HGS
GO:0003729	mRNA binding	1/255	425/16969	0.998523	0.998523	0.950464	1	27303	RBMS3

## Sheet: gene_filter peaks_UV_BP.
ID	Description	GeneRatio	BgRatio	pvalue	p.adjust	qvalue	Count	ENTREZID	SYMBOL
GO:0016311	dephosphorylation	28/394	458/17913	1.19042e-06	0.003448	0.00321006	28	22853/11314/84687/9110/26012/23371/251/54434/128853/1408/3612/5799/133522/5519/5797/4690/255919/4088/23261/1740/114794/23504/2070/116154/8613/22843/4249/10076	LMTK2/CD300A/PPP1R9B/MTMR4/NSMF/TNS2/ALPG/SSH1/DUSP15/CRY2/IMPA1/PTPRN2/PPARGC1B/PPP2R1B/PTPRM/NCK1/CNEP1R1/SMAD3/CAMTA1/DLG2/ELFN2/RIMBP2/EYA4/PHACTR3/PLPP3/PPM1E/MGAT5/PTPRU
GO:0006470	protein dephosphorylation	22/394	313/17913	1.81521e-06	0.003448	0.00321006	22	22853/11314/84687/9110/26012/23371/54434/128853/1408/5799/5519/5797/4690/255919/23261/114794/2070/116154/8613/22843/4249/10076	LMTK2/CD300A/PPP1R9B/MTMR4/NSMF/TNS2/SSH1/DUSP15/CRY2/PTPRN2/PPP2R1B/PTPRM/NCK1/CNEP1R1/CAMTA1/ELFN2/EYA4/PHACTR3/PLPP3/PPM1E/MGAT5/PTPRU
GO:0035303	regulation of dephosphorylation	16/394	206/17913	1.36637e-05	0.0173028	0.0161088	16	22853/11314/84687/9110/26012/1408/133522/5519/255919/4088/23261/1740/114794/23504/116154/4249	LMTK2/CD300A/PPP1R9B/MTMR4/NSMF/CRY2/PPARGC1B/PPP2R1B/CNEP1R1/SMAD3/CAMTA1/DLG2/ELFN2/RIMBP2/PHACTR3/MGAT5
GO:0048167	regulation of synaptic plasticity	13/394	169/17913	9.60593e-05	0.0912323	0.0849366	13	9066/26012/5024/2905/54434/7143/575/22941/6809/1627/4131/10755/2695	SYT7/NSMF/P2RX3/GRIN2C/SSH1/TNR/ADGRB1/SHANK2/STX3/DBN1/MAP1B/GIPC1/GIP
GO:0034765	regulation of ion transmembrane transport	23/394	453/17913	0.000186965	0.124763	0.116154	23	6569/3768/9948/50801/378807/27347/27133/3763/56479/7225/338440/1804/8911/775/779/1740/3746/5142/11060/8398/5144/57554/246329	SLC34A1/KCNJ12/WDR1/KCNK4/CATSPER4/STK39/KCNH5/KCNJ6/KCNQ5/TRPC6/ANO9/DPP6/CACNA1I/CACNA1C/CACNA1S/DLG2/KCNC1/PDE4B/WWP2/PLA2G6/PDE4D/LRRC7/STAC3
GO:0035304	regulation of protein dephosphorylation	11/394	137/17913	0.000225444	0.124763	0.116154	11	22853/11314/84687/26012/1408/5519/255919/23261/114794/116154/4249	LMTK2/CD300A/PPP1R9B/NSMF/CRY2/PPP2R1B/CNEP1R1/CAMTA1/ELFN2/PHACTR3/MGAT5
GO:0007411	axon guidance	14/394	210/17913	0.000238331	0.124763	0.116154	14	9846/1954/10500/7869/8022/55715/6469/2736/7143/5797/1605/6092/10818/1808	GAB2/MEGF8/SEMA6C/SEMA3B/LHX3/DOK4/SHH/GLI2/TNR/PTPRM/DAG1/ROBO2/FRS2/DPYSL2
GO:0097485	neuron projection guidance	14/394	212/17913	0.000262728	0.124763	0.116154	14	9846/1954/10500/7869/8022/55715/6469/2736/7143/5797/1605/6092/10818/1808	GAB2/MEGF8/SEMA6C/SEMA3B/LHX3/DOK4/SHH/GLI2/TNR/PTPRM/DAG1/ROBO2/FRS2/DPYSL2
GO:0010921	regulation of phosphatase activity	12/394	171/17913	0.000412992	0.174328	0.162298	12	22853/11314/84687/1408/133522/5519/4088/1740/114794/23504/116154/4249	LMTK2/CD300A/PPP1R9B/CRY2/PPARGC1B/PPP2R1B/SMAD3/DLG2/ELFN2/RIMBP2/PHACTR3/MGAT5
GO:0010975	regulation of neuron projection development	22/394	458/17913	0.000546264	0.207526	0.193205	22	26012/1954/6383/126520/112755/1902/5058/7225/27185/7143/4916/4690/114788/2042/23271/6092/4343/23613/1808/1627/4131/6911	NSMF/MEGF8/SDC2/PLK5/STX1B/LPAR1/PAK1/TRPC6/DISC1/TNR/NTRK3/NCK1/CSMD3/EPHA3/CAMSAP2/ROBO2/MOV10/ZMYND8/DPYSL2/DBN1/MAP1B/TBX6
GO:0061564	axon development	21/394	438/17913	0.00074338	0.215332	0.200473	21	9846/1954/10500/7869/8022/55715/6469/2736/5058/27185/7143/4916/5797/1605/2042/23271/6092/10818/1808/575/4131	GAB2/MEGF8/SEMA6C/SEMA3B/LHX3/DOK4/SHH/GLI2/PAK1/DISC1/TNR/NTRK3/PTPRM/DAG1/EPHA3/CAMSAP2/ROBO2/FRS2/DPYSL2/ADGRB1/MAP1B
GO:0048667	cell morphogenesis involved in neuron differentiation	23/394	500/17913	0.000744568	0.215332	0.200473	23	9846/26012/1954/10500/7869/8022/6383/55715/6469/2736/5058/7225/27185/7143/4916/5797/1605/6092/10818/1808/575/1627/4131	GAB2/NSMF/MEGF8/SEMA6C/SEMA3B/LHX3/SDC2/DOK4/SHH/GLI2/PAK1/TRPC6/DISC1/TNR/NTRK3/PTPRM/DAG1/ROBO2/FRS2/DPYSL2/ADGRB1/DBN1/MAP1B
GO:0032435	negative regulation of proteasomal ubiquitin-dependent protein catabolic process	5/394	34/17913	0.000825673	0.215332	0.200473	5	6469/101927423/2272/10755/29843	SHH/PANO1/FHIT/GIPC1/SENP1
GO:0051496	positive regulation of stress fiber assembly	6/394	51/17913	0.000850818	0.215332	0.200473	6	28984/1902/5058/4088/22843/7046	RGCC/LPAR1/PAK1/SMAD3/PPM1E/TGFBR1
GO:0048709	oligodendrocyte differentiation	8/394	94/17913	0.00109374	0.215332	0.200473	8	9948/55553/128853/6469/1902/26011/1605/79885	WDR1/SOX6/DUSP15/SHH/LPAR1/TENM4/DAG1/HDAC11
GO:0007409	axonogenesis	19/394	393/17913	0.00118969	0.215332	0.200473	19	9846/1954/10500/7869/8022/55715/6469/2736/5058/27185/7143/4916/5797/1605/6092/10818/1808/575/4131	GAB2/MEGF8/SEMA6C/SEMA3B/LHX3/DOK4/SHH/GLI2/PAK1/DISC1/TNR/NTRK3/PTPRM/DAG1/ROBO2/FRS2/DPYSL2/ADGRB1/MAP1B
GO:0050804	modulation of chemical synaptic transmission	19/394	393/17913	0.00118969	0.215332	0.200473	19	9066/84687/26012/5024/2905/54434/112755/27185/7143/1137/23613/575/22941/6809/1627/8398/4131/10755/2695	SYT7/PPP1R9B/NSMF/P2RX3/GRIN2C/SSH1/STX1B/DISC1/TNR/CHRNA4/ZMYND8/ADGRB1/SHANK2/STX3/DBN1/PLA2G6/MAP1B/GIPC1/GIP
GO:0099177	regulation of trans-synaptic signaling	19/394	394/17913	0.00122531	0.215332	0.200473	19	9066/84687/26012/5024/2905/54434/112755/27185/7143/1137/23613/575/22941/6809/1627/8398/4131/10755/2695	SYT7/PPP1R9B/NSMF/P2RX3/GRIN2C/SSH1/STX1B/DISC1/TNR/CHRNA4/ZMYND8/ADGRB1/SHANK2/STX3/DBN1/PLA2G6/MAP1B/GIPC1/GIP
GO:0035306	positive regulation of dephosphorylation	6/394	55/17913	0.00127232	0.215332	0.200473	6	11314/26012/133522/255919/4088/23261	CD300A/NSMF/PPARGC1B/CNEP1R1/SMAD3/CAMTA1
GO:0030516	regulation of axon extension	7/394	76/17913	0.00140162	0.215332	0.200473	7	1954/5058/27185/7143/4916/1808/4131	MEGF8/PAK1/DISC1/TNR/NTRK3/DPYSL2/MAP1B
GO:0022604	regulation of cell morphogenesis	20/394	430/17913	0.00142094	0.215332	0.200473	20	26012/1954/9948/6383/2035/1902/5058/7225/27185/7143/4916/152273/114299/1605/5168/6092/4343/1808/1627/4131	NSMF/MEGF8/WDR1/SDC2/EPB41/LPAR1/PAK1/TRPC6/DISC1/TNR/NTRK3/FGD5/PALM2/DAG1/ENPP2/ROBO2/MOV10/DPYSL2/DBN1/MAP1B
GO:0046434	organophosphate catabolic process	13/394	224/17913	0.00142898	0.215332	0.200473	13	5213/5167/3612/8086/7374/10846/81929/3098/9611/5168/5142/5144/405	PFKM/ENPP1/IMPA1/AAAS/UNG/PDE10A/SEH1L/HK1/NCOR1/ENPP2/PDE4B/PDE4D/ARNT
GO:0031915	positive regulation of synaptic plasticity	3/394	11/17913	0.00152787	0.215332	0.200473	3	54434/1627/4131	SSH1/DBN1/MAP1B
GO:0032515	negative regulation of phosphoprotein phosphatase activity	6/394	57/17913	0.00153514	0.215332	0.200473	6	22853/84687/1408/114794/116154/4249	LMTK2/PPP1R9B/CRY2/ELFN2/PHACTR3/MGAT5
GO:0048713	regulation of oligodendrocyte differentiation	5/394	39/17913	0.0015616	0.215332	0.200473	5	9948/128853/6469/26011/1605	WDR1/DUSP15/SHH/TENM4/DAG1
GO:0016925	protein sumoylation	7/394	78/17913	0.00163163	0.215332	0.200473	7	51588/8086/81929/286053/285498/405/29843	PIAS4/AAAS/SEH1L/NSMCE2/RNF212/ARNT/SENP1
GO:0030512	negative regulation of transforming growth factor beta receptor signaling pathway	7/394	78/17913	0.00163163	0.215332	0.200473	7	9110/4088/64750/63976/6497/7048/7046	MTMR4/SMAD3/SMURF2/PRDM16/SKI/TGFBR2/TGFBR1
GO:0032233	positive regulation of actin filament bundle assembly	6/394	58/17913	0.00168109	0.215332	0.200473	6	28984/1902/5058/4088/22843/7046	RGCC/LPAR1/PAK1/SMAD3/PPM1E/TGFBR1
GO:0010923	negative regulation of phosphatase activity	8/394	101/17913	0.00173914	0.215332	0.200473	8	22853/84687/1408/1740/114794/23504/116154/4249	LMTK2/PPP1R9B/CRY2/DLG2/ELFN2/RIMBP2/PHACTR3/MGAT5
GO:1901292	nucleoside phosphate catabolic process	11/394	175/17913	0.00174254	0.215332	0.200473	11	5213/5167/8086/7374/10846/81929/3098/9611/5142/5144/405	PFKM/ENPP1/AAAS/UNG/PDE10A/SEH1L/HK1/NCOR1/PDE4B/PDE4D/ARNT
GO:0001708	cell fate specification	7/394	79/17913	0.00175712	0.215332	0.200473	7	8022/55553/6469/2736/26011/4916/6911	LHX3/SOX6/SHH/GLI2/TENM4/NTRK3/TBX6
GO:1903845	negative regulation of cellular response to transforming growth factor beta stimulus	7/394	80/17913	0.00188998	0.224376	0.208892	7	9110/4088/64750/63976/6497/7048/7046	MTMR4/SMAD3/SMURF2/PRDM16/SKI/TGFBR2/TGFBR1
GO:0045773	positive regulation of axon extension	5/394	41/17913	0.00196092	0.225743	0.210165	5	1954/5058/27185/4916/4131	MEGF8/PAK1/DISC1/NTRK3/MAP1B
GO:0031646	positive regulation of neurological system process	6/394	61/17913	0.00218259	0.243599	0.226789	6	5024/54434/112755/7143/26011/1605	P2RX3/SSH1/STX1B/TNR/TENM4/DAG1
GO:0022011	myelination in peripheral nervous system	4/394	26/17913	0.00234862	0.243599	0.226789	4	4916/1605/79628/6497	NTRK3/DAG1/SH3TC2/SKI
GO:0032292	peripheral nervous system axon ensheathment	4/394	26/17913	0.00234862	0.243599	0.226789	4	4916/1605/79628/6497	NTRK3/DAG1/SH3TC2/SKI
GO:1901862	negative regulation of muscle tissue development	6/394	62/17913	0.00237251	0.243599	0.226789	6	55553/6469/5058/3488/10818/7048	SOX6/SHH/PAK1/IGFBP5/FRS2/TGFBR2
GO:0071559	response to transforming growth factor beta	13/394	239/17913	0.00253107	0.25304	0.235579	13	9110/55553/406959/55198/463/4088/1284/64750/63976/6497/7048/7046/10755	MTMR4/SOX6/MIR183/APPL2/ZFHX3/SMAD3/COL4A2/SMURF2/PRDM16/SKI/TGFBR2/TGFBR1/GIPC1
GO:0010001	glial cell differentiation	12/394	212/17913	0.00264352	0.257506	0.239737	12	9948/55553/128853/6469/1902/26011/4916/1605/79628/6497/1840/79885	WDR1/SOX6/DUSP15/SHH/LPAR1/TENM4/NTRK3/DAG1/SH3TC2/SKI/DTX1/HDAC11
GO:0035308	negative regulation of protein dephosphorylation	6/394	65/17913	0.00301724	0.270674	0.251996	6	22853/84687/1408/114794/116154/4249	LMTK2/PPP1R9B/CRY2/ELFN2/PHACTR3/MGAT5
GO:0000226	microtubule cytoskeleton organization	20/394	460/17913	0.00310161	0.270674	0.251996	20	64446/9648/10783/54461/10297/7405/8086/9696/5058/55722/27185/9611/1605/56907/2042/23271/55968/54462/1859/4131	DNAI2/GCC2/NEK6/FBXW5/APC2/UVRAG/AAAS/CROCC/PAK1/CEP72/DISC1/NCOR1/DAG1/SPIRE1/EPHA3/CAMSAP2/NSFL1C/CCSER2/DYRK1A/MAP1B
GO:0021782	glial cell development	8/394	111/17913	0.00314541	0.270674	0.251996	8	6469/1902/26011/4916/1605/79628/6497/79885	SHH/LPAR1/TENM4/NTRK3/DAG1/SH3TC2/SKI/HDAC11
GO:0035305	negative regulation of dephosphorylation	8/394	111/17913	0.00314541	0.270674	0.251996	8	22853/84687/1408/1740/114794/23504/116154/4249	LMTK2/PPP1R9B/CRY2/DLG2/ELFN2/RIMBP2/PHACTR3/MGAT5
GO:0009214	cyclic nucleotide catabolic process	3/394	14/17913	0.00320926	0.270674	0.251996	3	10846/5142/5144	PDE10A/PDE4B/PDE4D
GO:0009948	anterior/posterior axis specification	5/394	46/17913	0.00327965	0.270674	0.251996	5	6469/10409/10818/6497/6911	SHH/BASP1/FRS2/SKI/TBX6
GO:0032330	regulation of chondrocyte differentiation	5/394	46/17913	0.00327965	0.270674	0.251996	5	55553/2736/5915/4088/7046	SOX6/GLI2/RARB/SMAD3/TGFBR1
GO:0043666	regulation of phosphoprotein phosphatase activity	8/394	113/17913	0.0035105	0.270674	0.251996	8	22853/11314/84687/1408/5519/114794/116154/4249	LMTK2/CD300A/PPP1R9B/CRY2/PPP2R1B/ELFN2/PHACTR3/MGAT5
GO:0014044	Schwann cell development	4/394	29/17913	0.00354275	0.270674	0.251996	4	4916/1605/79628/6497	NTRK3/DAG1/SH3TC2/SKI
GO:2000059	negative regulation of ubiquitin-dependent protein catabolic process	5/394	47/17913	0.00360507	0.270674	0.251996	5	6469/101927423/2272/10755/29843	SHH/PANO1/FHIT/GIPC1/SENP1
GO:0050773	regulation of dendrite development	9/394	139/17913	0.00366338	0.270674	0.251996	9	26012/6383/1902/7225/27185/114788/23271/23613/1627	NSMF/SDC2/LPAR1/TRPC6/DISC1/CSMD3/CAMSAP2/ZMYND8/DBN1
GO:0061387	regulation of extent of cell growth	7/394	90/17913	0.0036891	0.270674	0.251996	7	1954/5058/27185/7143/4916/1808/4131	MEGF8/PAK1/DISC1/TNR/NTRK3/DPYSL2/MAP1B
GO:0007368	determination of left/right symmetry	8/394	114/17913	0.00370494	0.270674	0.251996	8	220136/64446/1954/6469/80114/9742/4088/7048	CFAP53/DNAI2/MEGF8/SHH/BICC1/IFT140/SMAD3/TGFBR2
GO:0002088	lens development in camera-type eye	6/394	68/17913	0.0037846	0.271277	0.252557	6	4916/4088/10818/6497/7048/7046	NTRK3/SMAD3/FRS2/SKI/TGFBR2/TGFBR1
GO:0017015	regulation of transforming growth factor beta receptor signaling pathway	8/394	115/17913	0.0039076	0.272608	0.253796	8	9110/4088/64750/63976/6497/7048/7046/10755	MTMR4/SMAD3/SMURF2/PRDM16/SKI/TGFBR2/TGFBR1/GIPC1
GO:0035864	response to potassium ion	3/394	15/17913	0.00394668	0.272608	0.253796	3	6569/1740/3746	SLC34A1/DLG2/KCNC1
GO:0007389	pattern specification process	18/394	408/17913	0.00421508	0.279239	0.259969	18	220136/64446/9289/1954/8022/6469/2736/80114/9742/4088/10409/6092/10818/6497/7048/7046/6911/56998	CFAP53/DNAI2/ADGRG1/MEGF8/LHX3/SHH/GLI2/BICC1/IFT140/SMAD3/BASP1/ROBO2/FRS2/SKI/TGFBR2/TGFBR1/TBX6/CTNNBIP1
GO:0009166	nucleotide catabolic process	10/394	169/17913	0.00428079	0.279239	0.259969	10	5213/8086/7374/10846/81929/3098/9611/5142/5144/405	PFKM/AAAS/UNG/PDE10A/SEH1L/HK1/NCOR1/PDE4B/PDE4D/ARNT
GO:0000186	activation of MAPKK activity	5/394	49/17913	0.00432434	0.279239	0.259969	5	4293/2911/10818/4217/7046	MAP3K9/GRM1/FRS2/MAP3K5/TGFBR1
GO:1903844	regulation of cellular response to transforming growth factor beta stimulus	8/394	117/17913	0.00433853	0.279239	0.259969	8	9110/4088/64750/63976/6497/7048/7046/10755	MTMR4/SMAD3/SMURF2/PRDM16/SKI/TGFBR2/TGFBR1/GIPC1
GO:0042063	gliogenesis	14/394	285/17913	0.0044102	0.279239	0.259969	14	9289/9948/55553/128853/6469/1902/27185/26011/4916/1605/79628/6497/1840/79885	ADGRG1/WDR1/SOX6/DUSP15/SHH/LPAR1/DISC1/TENM4/NTRK3/DAG1/SH3TC2/SKI/DTX1/HDAC11
GO:0099024	plasma membrane invagination	5/394	50/17913	0.00471986	0.292827	0.272619	5	11314/55198/9938/56907/575	CD300A/APPL2/ARHGAP25/SPIRE1/ADGRB1
GO:0002076	osteoblast development	3/394	16/17913	0.00477895	0.292827	0.272619	3	6469/2736/4088	SHH/GLI2/SMAD3
GO:0050772	positive regulation of axonogenesis	6/394	72/17913	0.00502156	0.299065	0.278427	6	1954/5058/27185/4916/6092/4131	MEGF8/PAK1/DISC1/NTRK3/ROBO2/MAP1B
GO:0090101	negative regulation of transmembrane receptor protein serine/threonine kinase signaling pathway	8/394	121/17913	0.00530925	0.299065	0.278427	8	9110/4088/64750/63976/348093/6497/7048/7046	MTMR4/SMAD3/SMURF2/PRDM16/RBPMS2/SKI/TGFBR2/TGFBR1
GO:0042552	myelination	8/394	122/17913	0.00557599	0.299065	0.278427	8	1902/26011/7038/4916/5915/1605/79628/6497	LPAR1/TENM4/TG/NTRK3/RARB/DAG1/SH3TC2/SKI
GO:0043954	cellular component maintenance	5/394	52/17913	0.0055868	0.299065	0.278427	5	26059/1740/144100/23613/3801	ERC2/DLG2/PLEKHA7/ZMYND8/KIFC3
GO:1901799	negative regulation of proteasomal protein catabolic process	5/394	52/17913	0.0055868	0.299065	0.278427	5	6469/101927423/2272/10755/29843	SHH/PANO1/FHIT/GIPC1/SENP1
GO:0071560	cellular response to transforming growth factor beta stimulus	12/394	233/17913	0.00562176	0.299065	0.278427	12	9110/55553/406959/55198/4088/1284/64750/63976/6497/7048/7046/10755	MTMR4/SOX6/MIR183/APPL2/SMAD3/COL4A2/SMURF2/PRDM16/SKI/TGFBR2/TGFBR1/GIPC1
GO:0051495	positive regulation of cytoskeleton organization	11/394	205/17913	0.00583309	0.299065	0.278427	11	28984/1902/5058/4916/4690/56907/4088/55968/22843/7046/4131	RGCC/LPAR1/PAK1/NTRK3/NCK1/SPIRE1/SMAD3/NSFL1C/PPM1E/TGFBR1/MAP1B
GO:0009855	determination of bilateral symmetry	8/394	123/17913	0.00585282	0.299065	0.278427	8	220136/64446/1954/6469/80114/9742/4088/7048	CFAP53/DNAI2/MEGF8/SHH/BICC1/IFT140/SMAD3/TGFBR2
GO:0030326	embryonic limb morphogenesis	8/394	123/17913	0.00585282	0.299065	0.278427	8	1954/6469/1889/2736/9742/775/5915/6497	MEGF8/SHH/ECE1/GLI2/IFT140/CACNA1C/RARB/SKI
GO:0035113	embryonic appendage morphogenesis	8/394	123/17913	0.00585282	0.299065	0.278427	8	1954/6469/1889/2736/9742/775/5915/6497	MEGF8/SHH/ECE1/GLI2/IFT140/CACNA1C/RARB/SKI
GO:0001657	ureteric bud development	7/394	98/17913	0.0058875	0.299065	0.278427	7	6469/5915/4088/10409/6092/80000/56998	SHH/RARB/SMAD3/BASP1/ROBO2/GREB1L/CTNNBIP1
GO:0050769	positive regulation of neurogenesis	19/394	455/17913	0.00596217	0.299065	0.278427	19	26012/1954/126520/6469/2736/1902/5058/7225/27185/26011/4916/4690/5915/1605/2042/6092/23613/1627/4131	NSMF/MEGF8/PLK5/SHH/GLI2/LPAR1/PAK1/TRPC6/DISC1/TENM4/NTRK3/NCK1/RARB/DAG1/EPHA3/ROBO2/ZMYND8/DBN1/MAP1B
GO:0007369	gastrulation	10/394	178/17913	0.00613807	0.299065	0.278427	10	1954/26011/1605/4088/1284/10818/1289/5573/7048/6911	MEGF8/TENM4/DAG1/SMAD3/COL4A2/FRS2/COL5A1/PRKAR1A/TGFBR2/TBX6
GO:0009799	specification of symmetry	8/394	124/17913	0.00613999	0.299065	0.278427	8	220136/64446/1954/6469/80114/9742/4088/7048	CFAP53/DNAI2/MEGF8/SHH/BICC1/IFT140/SMAD3/TGFBR2
GO:0042177	negative regulation of protein catabolic process	8/394	124/17913	0.00613999	0.299065	0.278427	8	2905/6469/101927423/2272/4088/575/10755/29843	GRIN2C/SHH/PANO1/FHIT/SMAD3/ADGRB1/GIPC1/SENP1
GO:0072163	mesonephric epithelium development	7/394	99/17913	0.00621904	0.299065	0.278427	7	6469/5915/4088/10409/6092/80000/56998	SHH/RARB/SMAD3/BASP1/ROBO2/GREB1L/CTNNBIP1
GO:0072164	mesonephric tubule development	7/394	99/17913	0.00621904	0.299065	0.278427	7	6469/5915/4088/10409/6092/80000/56998	SHH/RARB/SMAD3/BASP1/ROBO2/GREB1L/CTNNBIP1
GO:0048566	embryonic digestive tract development	4/394	34/17913	0.00634672	0.299137	0.278495	4	6469/2736/5915/348093	SHH/GLI2/RARB/RBPMS2
GO:0035265	organ growth	10/394	179/17913	0.00637802	0.299137	0.278495	10	6469/6788/5058/26011/5915/10409/196528/5573/7048/7046	SHH/STK3/PAK1/TENM4/RARB/BASP1/ARID2/PRKAR1A/TGFBR2/TGFBR1
GO:0031346	positive regulation of cell projection organization	16/394	362/17913	0.00665832	0.300305	0.279582	16	1954/126520/9696/1902/5058/27185/4916/10801/4690/2042/5168/6092/23613/1627/7046/4131	MEGF8/PLK5/CROCC/LPAR1/PAK1/DISC1/NTRK3/SEPTIN9/NCK1/EPHA3/ENPP2/ROBO2/ZMYND8/DBN1/TGFBR1/MAP1B
GO:0007272	ensheathment of neurons	8/394	126/17913	0.00674629	0.300305	0.279582	8	1902/26011/7038/4916/5915/1605/79628/6497	LPAR1/TENM4/TG/NTRK3/RARB/DAG1/SH3TC2/SKI
GO:0008366	axon ensheathment	8/394	126/17913	0.00674629	0.300305	0.279582	8	1902/26011/7038/4916/5915/1605/79628/6497	LPAR1/TENM4/TG/NTRK3/RARB/DAG1/SH3TC2/SKI
GO:0035335	peptidyl-tyrosine dephosphorylation	7/394	101/17913	0.00692362	0.300305	0.279582	7	9110/54434/128853/5799/5797/2070/10076	MTMR4/SSH1/DUSP15/PTPRN2/PTPRM/EYA4/PTPRU
GO:0048675	axon extension	7/394	101/17913	0.00692362	0.300305	0.279582	7	1954/5058/27185/7143/4916/1808/4131	MEGF8/PAK1/DISC1/TNR/NTRK3/DPYSL2/MAP1B
GO:0045685	regulation of glial cell differentiation	6/394	77/17913	0.00695626	0.300305	0.279582	6	9948/128853/6469/26011/4916/1605	WDR1/DUSP15/SHH/TENM4/NTRK3/DAG1
GO:0060411	cardiac septum morphogenesis	6/394	77/17913	0.00695626	0.300305	0.279582	6	5915/9249/6092/7048/7468/7046	RARB/DHRS3/ROBO2/TGFBR2/NSD2/TGFBR1
GO:0071312	cellular response to alkaloid	4/394	35/17913	0.00704357	0.300658	0.27991	4	6569/84687/23514/779	SLC34A1/PPP1R9B/SPIDR/CACNA1S
GO:0034404	nucleobase-containing small molecule biosynthetic process	11/394	211/17913	0.0071935	0.303645	0.282692	11	5213/5167/8086/7374/10846/81929/3098/9611/5142/5144/405	PFKM/ENPP1/AAAS/UNG/PDE10A/SEH1L/HK1/NCOR1/PDE4B/PDE4D/ARNT
GO:0008589	regulation of smoothened signaling pathway	6/394	78/17913	0.00739998	0.308929	0.287611	6	730094/1954/6469/5167/2736/9742	MOSMO/MEGF8/SHH/ENPP1/GLI2/IFT140
GO:0001823	mesonephros development	7/394	103/17913	0.00768578	0.310394	0.288975	7	6469/5915/4088/10409/6092/80000/56998	SHH/RARB/SMAD3/BASP1/ROBO2/GREB1L/CTNNBIP1
GO:0007179	transforming growth factor beta receptor signaling pathway	10/394	184/17913	0.00768915	0.310394	0.288975	10	9110/406959/55198/4088/64750/63976/6497/7048/7046/10755	MTMR4/MIR183/APPL2/SMAD3/SMURF2/PRDM16/SKI/TGFBR2/TGFBR1/GIPC1
GO:0008037	cell recognition	8/394	129/17913	0.00773932	0.310394	0.288975	8	1954/81704/378807/30835/2042/6092/575/921	MEGF8/DOCK8/CATSPER4/CD209/EPHA3/ROBO2/ADGRB1/CD5
GO:0033002	muscle cell proliferation	12/394	243/17913	0.0077619	0.310394	0.288975	12	6469/5058/26011/3488/5592/4217/348093/196528/5573/7048/7046/56998	SHH/PAK1/TENM4/IGFBP5/PRKG1/MAP3K5/RBPMS2/ARID2/PRKAR1A/TGFBR2/TGFBR1/CTNNBIP1
GO:0032331	negative regulation of chondrocyte differentiation	3/394	19/17913	0.00787574	0.311666	0.290159	3	2736/5915/7046	GLI2/RARB/TGFBR1
GO:0090092	regulation of transmembrane receptor protein serine/threonine kinase signaling pathway	11/394	215/17913	0.00823002	0.322328	0.300085	11	9110/6469/23090/4088/64750/63976/348093/6497/7048/7046/10755	MTMR4/SHH/ZNF423/SMAD3/SMURF2/PRDM16/RBPMS2/SKI/TGFBR2/TGFBR1/GIPC1
GO:0016358	dendrite development	11/394	216/17913	0.00850642	0.329428	0.306695	11	26012/6383/1902/7225/27185/114788/23271/5592/23613/1627/23769	NSMF/SDC2/LPAR1/TRPC6/DISC1/CSMD3/CAMSAP2/PRKG1/ZMYND8/DBN1/FLRT1
GO:0014037	Schwann cell differentiation	4/394	37/17913	0.00858472	0.329428	0.306695	4	4916/1605/79628/6497	NTRK3/DAG1/SH3TC2/SKI
GO:0010324	membrane invagination	5/394	58/17913	0.00885305	0.336249	0.313046	5	11314/55198/9938/56907/575	CD300A/APPL2/ARHGAP25/SPIRE1/ADGRB1
GO:0030878	thyroid gland development	3/394	20/17913	0.00911653	0.336249	0.313046	3	6469/7038/4088	SHH/TG/SMAD3
GO:0044331	cell-cell adhesion mediated by cadherin	3/394	20/17913	0.00911653	0.336249	0.313046	3	28984/144100/10076	RGCC/PLEKHA7/PTPRU
GO:0097503	sialylation	3/394	20/17913	0.00911653	0.336249	0.313046	3	8869/6483/6482	ST3GAL5/ST3GAL2/ST3GAL1
GO:0014855	striated muscle cell proliferation	6/394	82/17913	0.00938049	0.342659	0.319013	6	6469/26011/196528/5573/7048/7046	SHH/TENM4/ARID2/PRKAR1A/TGFBR2/TGFBR1
GO:0031644	regulation of neurological system process	8/394	134/17913	0.00963342	0.345343	0.321511	8	5024/54434/112755/7143/26011/1605/2911/23613	P2RX3/SSH1/STX1B/TNR/TENM4/DAG1/GRM1/ZMYND8
GO:0043087	regulation of GTPase activity	17/394	410/17913	0.00963577	0.345343	0.321511	17	10297/81704/1121/60682/5799/9938/4916/5902/152273/9628/2042/8601/5592/10483/9901/54453/57568	APC2/DOCK8/CHM/SMAP1/PTPRN2/ARHGAP25/NTRK3/RANBP1/FGD5/RGS6/EPHA3/RGS20/PRKG1/SEC23B/SRGAP3/RIN2/SIPA1L2
GO:0051492	regulation of stress fiber assembly	6/394	83/17913	0.00992944	0.352542	0.328214	6	28984/1902/5058/4088/22843/7046	RGCC/LPAR1/PAK1/SMAD3/PPM1E/TGFBR1
GO:0009880	embryonic pattern specification	5/394	60/17913	0.0101843	0.358169	0.333453	5	6469/4088/10409/10818/6911	SHH/SMAD3/BASP1/FRS2/TBX6
GO:0021513	spinal cord dorsal/ventral patterning	3/394	21/17913	0.0104651	0.358169	0.333453	3	8022/6469/2736	LHX3/SHH/GLI2
GO:0046058	cAMP metabolic process	3/394	21/17913	0.0104651	0.358169	0.333453	3	10846/5142/5144	PDE10A/PDE4B/PDE4D
GO:1903055	positive regulation of extracellular matrix organization	3/394	21/17913	0.0104651	0.358169	0.333453	3	28984/1605/4088	RGCC/DAG1/SMAD3
GO:0048645	animal organ formation	5/394	61/17913	0.0108988	0.363933	0.338819	5	6469/2736/6092/10818/7048	SHH/GLI2/ROBO2/FRS2/TGFBR2
GO:0042475	odontogenesis of dentin-containing tooth	6/394	85/17913	0.0110952	0.363933	0.338819	6	6569/26504/54757/6469/2736/79641	SLC34A1/CNNM4/FAM20A/SHH/GLI2/ROGDI
GO:0045185	maintenance of protein location	6/394	85/17913	0.0110952	0.363933	0.338819	6	11124/3098/9913/1605/4601/1627	FAF1/HK1/SUPT7L/DAG1/MXI1/DBN1
GO:0003002	regionalization	14/394	318/17913	0.0111017	0.363933	0.338819	14	9289/1954/8022/6469/2736/9742/4088/10409/6092/10818/6497/7046/6911/56998	ADGRG1/MEGF8/LHX3/SHH/GLI2/IFT140/SMAD3/BASP1/ROBO2/FRS2/SKI/TGFBR1/TBX6/CTNNBIP1
GO:0032924	activin receptor signaling pathway	4/394	40/17913	0.0112842	0.363933	0.338819	4	6469/4088/6497/7046	SHH/SMAD3/SKI/TGFBR1
GO:0040019	positive regulation of embryonic development	4/394	40/17913	0.0112842	0.363933	0.338819	4	6469/26011/1605/9904	SHH/TENM4/DAG1/RBM19
GO:0048013	ephrin receptor signaling pathway	6/394	86/17913	0.011713	0.363933	0.338819	6	6383/5058/4916/4690/2042/1943	SDC2/PAK1/NTRK3/NCK1/EPHA3/EFNA2
GO:0060419	heart growth	7/394	112/17913	0.0118996	0.363933	0.338819	7	5058/26011/10409/196528/5573/7048/7046	PAK1/TENM4/BASP1/ARID2/PRKAR1A/TGFBR2/TGFBR1
GO:0048714	positive regulation of oligodendrocyte differentiation	3/394	22/17913	0.011923	0.363933	0.338819	3	6469/26011/1605	SHH/TENM4/DAG1
GO:0051220	cytoplasmic sequestering of protein	3/394	22/17913	0.011923	0.363933	0.338819	3	11124/4601/1627	FAF1/MXI1/DBN1
GO:0070838	divalent metal ion transport	18/394	454/17913	0.0120739	0.363933	0.338819	18	5024/2905/378807/26504/162514/2035/7225/8911/775/1137/779/8614/5142/348938/8398/5144/283229/246329	P2RX3/GRIN2C/CATSPER4/CNNM4/TRPV3/EPB41/TRPC6/CACNA1I/CACNA1C/CHRNA4/CACNA1S/STC2/PDE4B/NIPAL4/PLA2G6/PDE4D/CRACR2B/STAC3
GO:0006911	phagocytosis, engulfment	4/394	41/17913	0.0122921	0.363933	0.338819	4	11314/55198/9938/575	CD300A/APPL2/ARHGAP25/ADGRB1
GO:0014003	oligodendrocyte development	4/394	41/17913	0.0122921	0.363933	0.338819	4	6469/1902/26011/79885	SHH/LPAR1/TENM4/HDAC11
GO:0019048	modulation by virus of host morphology or physiology	4/394	41/17913	0.0122921	0.363933	0.338819	4	30835/4916/1605/4088	CD209/NTRK3/DAG1/SMAD3
GO:0031641	regulation of myelination	4/394	41/17913	0.0122921	0.363933	0.338819	4	26011/7038/5915/1605	TENM4/TG/RARB/DAG1
GO:0051961	negative regulation of nervous system development	13/394	290/17913	0.0122923	0.363933	0.338819	13	9289/6469/112755/55198/1902/7225/7143/4916/6092/9745/6497/1840/6911	ADGRG1/SHH/STX1B/APPL2/LPAR1/TRPC6/TNR/NTRK3/ROBO2/ZNF536/SKI/DTX1/TBX6
GO:0060021	roof of mouth development	6/394	87/17913	0.0123546	0.363933	0.338819	6	6469/9249/63976/6497/7048/7046	SHH/DHRS3/PRDM16/SKI/TGFBR2/TGFBR1
GO:0045666	positive regulation of neuron differentiation	15/394	355/17913	0.0124083	0.363933	0.338819	15	1954/126520/2736/1902/5058/7225/27185/4916/4690/5915/2042/6092/23613/1627/4131	MEGF8/PLK5/GLI2/LPAR1/PAK1/TRPC6/DISC1/NTRK3/NCK1/RARB/EPHA3/ROBO2/ZMYND8/DBN1/MAP1B
GO:0003279	cardiac septum development	7/394	113/17913	0.0124536	0.363933	0.338819	7	5915/9249/6092/10818/7048/7468/7046	RARB/DHRS3/ROBO2/FRS2/TGFBR2/NSD2/TGFBR1
GO:0007178	transmembrane receptor protein serine/threonine kinase signaling pathway	14/394	323/17913	0.0125867	0.364914	0.339732	14	9110/1954/406959/6469/55198/23090/4088/64750/63976/348093/6497/7048/7046/10755	MTMR4/MEGF8/MIR183/SHH/APPL2/ZNF423/SMAD3/SMURF2/PRDM16/RBPMS2/SKI/TGFBR2/TGFBR1/GIPC1
GO:0022407	regulation of cell-cell adhesion	16/394	389/17913	0.0126793	0.364914	0.339732	16	11314/81704/28984/6693/30835/6469/2736/5058/7143/4690/5592/5573/7048/8613/1840/10076	CD300A/DOCK8/RGCC/SPN/CD209/SHH/GLI2/PAK1/TNR/NCK1/PRKG1/PRKAR1A/TGFBR2/PLPP3/DTX1/PTPRU
GO:0010769	regulation of cell morphogenesis involved in differentiation	12/394	260/17913	0.012813	0.365991	0.340735	12	26012/1954/6383/5058/7225/27185/7143/4916/6092/1808/1627/4131	NSMF/MEGF8/SDC2/PAK1/TRPC6/DISC1/TNR/NTRK3/ROBO2/DPYSL2/DBN1/MAP1B
GO:0000280	nuclear division	15/394	357/17913	0.0130037	0.366105	0.340841	15	84687/10783/54461/28984/84861/84250/8086/81929/56907/286053/157777/79703/55968/5573/285498	PPP1R9B/NEK6/FBXW5/RGCC/KLHL22/SLF1/AAAS/SEH1L/SPIRE1/NSMCE2/MCMDC2/C11orf80/NSFL1C/PRKAR1A/RNF212
GO:0072511	divalent inorganic cation transport	18/394	458/17913	0.0131058	0.366105	0.340841	18	5024/2905/378807/26504/162514/2035/7225/8911/775/1137/779/8614/5142/348938/8398/5144/283229/246329	P2RX3/GRIN2C/CATSPER4/CNNM4/TRPV3/EPB41/TRPC6/CACNA1I/CACNA1C/CHRNA4/CACNA1S/STC2/PDE4B/NIPAL4/PLA2G6/PDE4D/CRACR2B/STAC3
GO:0048638	regulation of developmental growth	14/394	325/17913	0.0132221	0.366105	0.340841	14	1954/83481/6788/5058/27185/7143/4916/10409/55777/8614/1808/7048/7046/4131	MEGF8/EPPK1/STK3/PAK1/DISC1/TNR/NTRK3/BASP1/MBD5/STC2/DPYSL2/TGFBR2/TGFBR1/MAP1B
GO:0048663	neuron fate commitment	5/394	64/17913	0.0132456	0.366105	0.340841	5	8022/6469/2736/4916/7046	LHX3/SHH/GLI2/NTRK3/TGFBR1
GO:0035307	positive regulation of protein dephosphorylation	4/394	42/17913	0.0133559	0.366105	0.340841	4	11314/26012/255919/23261	CD300A/NSMF/CNEP1R1/CAMTA1
GO:0021511	spinal cord patterning	3/394	23/17913	0.0134916	0.366105	0.340841	3	8022/6469/2736	LHX3/SHH/GLI2
GO:2000726	negative regulation of cardiac muscle cell differentiation	3/394	23/17913	0.0134916	0.366105	0.340841	3	55553/5058/10818	SOX6/PAK1/FRS2
GO:0055123	digestive system development	8/394	143/17913	0.0138826	0.369984	0.344452	8	1954/6469/2736/5915/4088/348093/7048/2695	MEGF8/SHH/GLI2/RARB/SMAD3/RBPMS2/TGFBR2/GIP
GO:0007163	establishment or maintenance of cell polarity	9/394	172/17913	0.014036	0.369984	0.344452	9	9948/81704/6693/6469/5058/286/55968/23150/4131	WDR1/DOCK8/SPN/SHH/PAK1/ANK1/NSFL1C/FRMD4B/MAP1B
GO:0051783	regulation of nuclear division	9/394	172/17913	0.014036	0.369984	0.344452	9	84687/10783/54461/28984/84861/84250/286053/55968/5573	PPP1R9B/NEK6/FBXW5/RGCC/KLHL22/SLF1/NSMCE2/NSFL1C/PRKAR1A
GO:1904888	cranial skeletal system development	5/394	65/17913	0.014098	0.369984	0.344452	5	1954/9742/4088/7048/7046	MEGF8/IFT140/SMAD3/TGFBR2/TGFBR1
GO:0055026	negative regulation of cardiac muscle tissue development	4/394	43/17913	0.0144764	0.369984	0.344452	4	55553/5058/10818/7048	SOX6/PAK1/FRS2/TGFBR2
GO:0010976	positive regulation of neuron projection development	12/394	265/17913	0.0146957	0.369984	0.344452	12	1954/126520/1902/5058/27185/4916/4690/2042/6092/23613/1627/4131	MEGF8/PLK5/LPAR1/PAK1/DISC1/NTRK3/NCK1/EPHA3/ROBO2/ZMYND8/DBN1/MAP1B
GO:0001558	regulation of cell growth	16/394	396/17913	0.014786	0.369984	0.344452	16	84687/1954/6595/84861/5167/5058/27185/7143/55031/4916/4088/26153/3488/1808/7046/4131	PPP1R9B/MEGF8/SMARCA2/KLHL22/ENPP1/PAK1/DISC1/TNR/USP47/NTRK3/SMAD3/KIF26A/IGFBP5/DPYSL2/TGFBR1/MAP1B
GO:0032412	regulation of ion transmembrane transporter activity	11/394	234/17913	0.0148201	0.369984	0.344452	11	27347/7225/338440/1740/3746/5142/11060/8398/5144/57554/246329	STK39/TRPC6/ANO9/DLG2/KCNC1/PDE4B/WWP2/PLA2G6/PDE4D/LRRC7/STAC3
GO:0051148	negative regulation of muscle cell differentiation	5/394	66/17913	0.0149865	0.369984	0.344452	5	55553/6469/5058/10818/348093	SOX6/SHH/PAK1/FRS2/RBPMS2
GO:0061035	regulation of cartilage development	5/394	66/17913	0.0149865	0.369984	0.344452	5	55553/2736/5915/4088/7046	SOX6/GLI2/RARB/SMAD3/TGFBR1
GO:0010717	regulation of epithelial to mesenchymal transition	6/394	91/17913	0.0151686	0.369984	0.344452	6	28984/1605/4088/2042/7048/7046	RGCC/DAG1/SMAD3/EPHA3/TGFBR2/TGFBR1
GO:0003272	endocardial cushion formation	3/394	24/17913	0.0151721	0.369984	0.344452	3	6092/7048/7046	ROBO2/TGFBR2/TGFBR1
GO:0043951	negative regulation of cAMP-mediated signaling	3/394	24/17913	0.0151721	0.369984	0.344452	3	1902/10846/5144	LPAR1/PDE10A/PDE4D
GO:0016049	cell growth	18/394	466/17913	0.015378	0.369984	0.344452	18	84687/1954/6595/84861/5167/5058/27185/7143/55031/4916/4088/26153/3488/1808/7048/7046/4131/23769	PPP1R9B/MEGF8/SMARCA2/KLHL22/ENPP1/PAK1/DISC1/TNR/USP47/NTRK3/SMAD3/KIF26A/IGFBP5/DPYSL2/TGFBR2/TGFBR1/MAP1B/FLRT1
GO:0035107	appendage morphogenesis	8/394	146/17913	0.0155633	0.369984	0.344452	8	1954/6469/1889/2736/9742/775/5915/6497	MEGF8/SHH/ECE1/GLI2/IFT140/CACNA1C/RARB/SKI
GO:0035108	limb morphogenesis	8/394	146/17913	0.0155633	0.369984	0.344452	8	1954/6469/1889/2736/9742/775/5915/6497	MEGF8/SHH/ECE1/GLI2/IFT140/CACNA1C/RARB/SKI
GO:0010959	regulation of metal ion transport	15/394	365/17913	0.0156112	0.369984	0.344452	15	5024/162514/2035/27347/7225/1804/775/8614/3746/5142/11060/8398/5144/283229/246329	P2RX3/TRPV3/EPB41/STK39/TRPC6/DPP6/CACNA1C/STC2/KCNC1/PDE4B/WWP2/PLA2G6/PDE4D/CRACR2B/STAC3
GO:0032527	protein exit from endoplasmic reticulum	4/394	44/17913	0.0156548	0.369984	0.344452	4	9648/81502/79139/55666	GCC2/HM13/DERL1/NPLOC4
GO:0048701	embryonic cranial skeleton morphogenesis	4/394	44/17913	0.0156548	0.369984	0.344452	4	9742/4088/7048/7046	IFT140/SMAD3/TGFBR2/TGFBR1
GO:1903051	negative regulation of proteolysis involved in cellular protein catabolic process	5/394	67/17913	0.0159116	0.369984	0.344452	5	6469/101927423/2272/10755/29843	SHH/PANO1/FHIT/GIPC1/SENP1
GO:0044070	regulation of anion transport	6/394	93/17913	0.0167301	0.369984	0.344452	6	6569/27347/1408/338440/9611/8398	SLC34A1/STK39/CRY2/ANO9/NCOR1/PLA2G6
GO:0050770	regulation of axonogenesis	8/394	148/17913	0.0167627	0.369984	0.344452	8	1954/5058/27185/7143/4916/6092/1808/4131	MEGF8/PAK1/DISC1/TNR/NTRK3/ROBO2/DPYSL2/MAP1B
GO:1990138	neuron projection extension	8/394	148/17913	0.0167627	0.369984	0.344452	8	1954/5058/27185/7143/4916/1808/4131/23769	MEGF8/PAK1/DISC1/TNR/NTRK3/DPYSL2/MAP1B/FLRT1
GO:0060038	cardiac muscle cell proliferation	5/394	68/17913	0.0168741	0.369984	0.344452	5	26011/196528/5573/7048/7046	TENM4/ARID2/PRKAR1A/TGFBR2/TGFBR1
GO:0060412	ventricular septum morphogenesis	4/394	45/17913	0.0168917	0.369984	0.344452	4	6092/7048/7468/7046	ROBO2/TGFBR2/NSD2/TGFBR1
GO:0001702	gastrulation with mouth forming second	3/394	25/17913	0.0169653	0.369984	0.344452	3	1954/26011/10818	MEGF8/TENM4/FRS2
GO:0035640	exploration behavior	3/394	25/17913	0.0169653	0.369984	0.344452	3	7143/1137/2695	TNR/CHRNA4/GIP
GO:0060740	prostate gland epithelium morphogenesis	3/394	25/17913	0.0169653	0.369984	0.344452	3	6469/2736/10818	SHH/GLI2/FRS2
GO:2001235	positive regulation of apoptotic signaling pathway	9/394	178/17913	0.0171916	0.369984	0.344452	9	6788/51588/11124/5519/4690/4088/9705/7046/8398	STK3/PIAS4/FAF1/PPP2R1B/NCK1/SMAD3/ST18/TGFBR1/PLA2G6
GO:0050768	negative regulation of neurogenesis	12/394	271/17913	0.0172245	0.369984	0.344452	12	9289/6469/112755/55198/1902/7225/7143/4916/9745/6497/1840/6911	ADGRG1/SHH/STX1B/APPL2/LPAR1/TRPC6/TNR/NTRK3/ZNF536/SKI/DTX1/TBX6
GO:0032231	regulation of actin filament bundle assembly	6/394	94/17913	0.0175509	0.369984	0.344452	6	28984/1902/5058/4088/22843/7046	RGCC/LPAR1/PAK1/SMAD3/PPM1E/TGFBR1
GO:0110020	regulation of actomyosin structure organization	6/394	94/17913	0.0175509	0.369984	0.344452	6	28984/1902/5058/4088/22843/7046	RGCC/LPAR1/PAK1/SMAD3/PPM1E/TGFBR1
GO:0007422	peripheral nervous system development	5/394	69/17913	0.0178744	0.369984	0.344452	5	4916/1605/79628/575/6497	NTRK3/DAG1/SH3TC2/ADGRB1/SKI
GO:0007088	regulation of mitotic nuclear division	8/394	150/17913	0.0180274	0.369984	0.344452	8	84687/10783/54461/28984/84861/84250/286053/55968	PPP1R9B/NEK6/FBXW5/RGCC/KLHL22/SLF1/NSMCE2/NSFL1C
GO:1904738	vascular associated smooth muscle cell migration	4/394	46/17913	0.0181881	0.369984	0.344452	4	54434/5058/3488/5592	SSH1/PAK1/IGFBP5/PRKG1
GO:1904752	regulation of vascular associated smooth muscle cell migration	4/394	46/17913	0.0181881	0.369984	0.344452	4	54434/5058/3488/5592	SSH1/PAK1/IGFBP5/PRKG1
GO:0035270	endocrine system development	7/394	122/17913	0.0183023	0.369984	0.344452	7	8022/6469/2736/7038/4088/7046/2695	LHX3/SHH/GLI2/TG/SMAD3/TGFBR1/GIP
GO:0022898	regulation of transmembrane transporter activity	11/394	242/17913	0.0185535	0.369984	0.344452	11	27347/7225/338440/1740/3746/5142/11060/8398/5144/57554/246329	STK39/TRPC6/ANO9/DLG2/KCNC1/PDE4B/WWP2/PLA2G6/PDE4D/LRRC7/STAC3
GO:0006302	double-strand break repair	10/394	211/17913	0.0186723	0.369984	0.344452	10	7405/84250/51588/23514/8924/56907/286053/157777/7468/2067	UVRAG/SLF1/PIAS4/SPIDR/HERC2/SPIRE1/NSMCE2/MCMDC2/NSD2/ERCC1
GO:0009154	purine ribonucleotide catabolic process	3/394	26/17913	0.0188718	0.369984	0.344452	3	10846/5142/5144	PDE10A/PDE4B/PDE4D
GO:0061037	negative regulation of cartilage development	3/394	26/17913	0.0188718	0.369984	0.344452	3	2736/5915/7046	GLI2/RARB/TGFBR1
GO:1903959	regulation of anion transmembrane transport	3/394	26/17913	0.0188718	0.369984	0.344452	3	6569/27347/338440	SLC34A1/STK39/ANO9
GO:1904754	positive regulation of vascular associated smooth muscle cell migration	3/394	26/17913	0.0188718	0.369984	0.344452	3	54434/5058/3488	SSH1/PAK1/IGFBP5
GO:0032970	regulation of actin filament-based process	14/394	341/17913	0.0192411	0.369984	0.344452	14	9948/28984/1902/5058/4916/4690/775/56907/4088/2042/5142/22843/7046/5144	WDR1/RGCC/LPAR1/PAK1/NTRK3/NCK1/CACNA1C/SPIRE1/SMAD3/EPHA3/PDE4B/PPM1E/TGFBR1/PDE4D
GO:0003149	membranous septum morphogenesis	2/394	10/17913	0.0193219	0.369984	0.344452	2	7048/7468	TGFBR2/NSD2
GO:0010998	regulation of translational initiation by eIF2 alpha phosphorylation	2/394	10/17913	0.0193219	0.369984	0.344452	2	27102/4690	EIF2AK1/NCK1
GO:0014877	response to muscle inactivity involved in regulation of muscle adaptation	2/394	10/17913	0.0193219	0.369984	0.344452	2	9110/1605	MTMR4/DAG1
GO:0014894	response to denervation involved in regulation of muscle adaptation	2/394	10/17913	0.0193219	0.369984	0.344452	2	9110/1605	MTMR4/DAG1
GO:0021936	regulation of cerebellar granule cell precursor proliferation	2/394	10/17913	0.0193219	0.369984	0.344452	2	6469/2736	SHH/GLI2
GO:0044351	macropinocytosis	2/394	10/17913	0.0193219	0.369984	0.344452	2	112755/55198	STX1B/APPL2
GO:0060439	trachea morphogenesis	2/394	10/17913	0.0193219	0.369984	0.344452	2	6469/7048	SHH/TGFBR2
GO:0060513	prostatic bud formation	2/394	10/17913	0.0193219	0.369984	0.344452	2	6469/2736	SHH/GLI2
GO:1904779	regulation of protein localization to centrosome	2/394	10/17913	0.0193219	0.369984	0.344452	2	55722/55968	CEP72/NSFL1C
GO:1901861	regulation of muscle tissue development	8/394	152/17913	0.0193591	0.369984	0.344452	8	55553/6469/5058/4088/3488/10818/7048/7046	SOX6/SHH/PAK1/SMAD3/IGFBP5/FRS2/TGFBR2/TGFBR1
GO:0014911	positive regulation of smooth muscle cell migration	4/394	47/17913	0.0195447	0.369984	0.344452	4	54434/1902/5058/3488	SSH1/LPAR1/PAK1/IGFBP5
GO:0031113	regulation of microtubule polymerization	4/394	47/17913	0.0195447	0.369984	0.344452	4	5058/23271/1859/4131	PAK1/CAMSAP2/DYRK1A/MAP1B
GO:0009952	anterior/posterior pattern specification	9/394	182/17913	0.0195648	0.369984	0.344452	9	6469/2736/4088/10409/10818/6497/7046/6911/56998	SHH/GLI2/SMAD3/BASP1/FRS2/SKI/TGFBR1/TBX6/CTNNBIP1
GO:0090287	regulation of cellular response to growth factor stimulus	12/394	276/17913	0.0195711	0.369984	0.344452	12	9110/4916/23090/4088/64750/63976/348093/6497/7048/7046/405/10755	MTMR4/NTRK3/ZNF423/SMAD3/SMURF2/PRDM16/RBPMS2/SKI/TGFBR2/TGFBR1/ARNT/GIPC1
GO:0051924	regulation of calcium ion transport	11/394	244/17913	0.0195872	0.369984	0.344452	11	5024/162514/2035/7225/775/8614/5142/8398/5144/283229/246329	P2RX3/TRPV3/EPB41/TRPC6/CACNA1C/STC2/PDE4B/PLA2G6/PDE4D/CRACR2B/STAC3
GO:0035023	regulation of Rho protein signal transduction	7/394	124/17913	0.0198262	0.369984	0.344452	7	9289/84904/1902/152273/23263/153478/50650	ADGRG1/ARHGEF39/LPAR1/FGD5/MCF2L/PLEKHG4B/ARHGEF3
GO:0002062	chondrocyte differentiation	6/394	97/17913	0.0201782	0.369984	0.344452	6	55553/2736/5915/4088/7048/7046	SOX6/GLI2/RARB/SMAD3/TGFBR2/TGFBR1
GO:0030038	contractile actin filament bundle assembly	6/394	97/17913	0.0201782	0.369984	0.344452	6	28984/1902/5058/4088/22843/7046	RGCC/LPAR1/PAK1/SMAD3/PPM1E/TGFBR1
GO:0043149	stress fiber assembly	6/394	97/17913	0.0201782	0.369984	0.344452	6	28984/1902/5058/4088/22843/7046	RGCC/LPAR1/PAK1/SMAD3/PPM1E/TGFBR1
GO:0060560	developmental growth involved in morphogenesis	10/394	214/17913	0.0203764	0.369984	0.344452	10	1954/6469/5058/27185/7143/4916/1808/7048/4131/23769	MEGF8/SHH/PAK1/DISC1/TNR/NTRK3/DPYSL2/TGFBR2/MAP1B/FLRT1
GO:0003148	outflow tract septum morphogenesis	3/394	27/17913	0.0208921	0.369984	0.344452	3	5915/6092/7048	RARB/ROBO2/TGFBR2
GO:0009261	ribonucleotide catabolic process	3/394	27/17913	0.0208921	0.369984	0.344452	3	10846/5142/5144	PDE10A/PDE4B/PDE4D
GO:0060512	prostate gland morphogenesis	3/394	27/17913	0.0208921	0.369984	0.344452	3	6469/2736/10818	SHH/GLI2/FRS2
GO:1905208	negative regulation of cardiocyte differentiation	3/394	27/17913	0.0208921	0.369984	0.344452	3	55553/5058/10818	SOX6/PAK1/FRS2
GO:0031103	axon regeneration	4/394	48/17913	0.0209621	0.369984	0.344452	4	7143/4916/1605/4131	TNR/NTRK3/DAG1/MAP1B
GO:0044003	modification by symbiont of host morphology or physiology	4/394	48/17913	0.0209621	0.369984	0.344452	4	30835/4916/1605/4088	CD209/NTRK3/DAG1/SMAD3
GO:0045840	positive regulation of mitotic nuclear division	4/394	48/17913	0.0209621	0.369984	0.344452	4	28984/84250/286053/55968	RGCC/SLF1/NSMCE2/NSFL1C
GO:0048546	digestive tract morphogenesis	4/394	48/17913	0.0209621	0.369984	0.344452	4	6469/2736/4088/348093	SHH/GLI2/SMAD3/RBPMS2
GO:0006695	cholesterol biosynthetic process	5/394	72/17913	0.0211079	0.369984	0.344452	5	10449/2194/3930/406959/6721	ACAA2/FASN/LBR/MIR183/SREBF2
GO:0051651	maintenance of location in cell	5/394	72/17913	0.0211079	0.369984	0.344452	5	7405/3098/9913/1605/1627	UVRAG/HK1/SUPT7L/DAG1/DBN1
GO:1902653	secondary alcohol biosynthetic process	5/394	72/17913	0.0211079	0.369984	0.344452	5	10449/2194/3930/406959/6721	ACAA2/FASN/LBR/MIR183/SREBF2
GO:0042476	odontogenesis	7/394	126/17913	0.0214366	0.369984	0.344452	7	6569/26504/54757/6469/2736/51066/79641	SLC34A1/CNNM4/FAM20A/SHH/GLI2/SSUH2/ROGDI
GO:0048489	synaptic vesicle transport	7/394	126/17913	0.0214366	0.369984	0.344452	7	10239/9066/112755/26059/1137/6809/10755	AP3S2/SYT7/STX1B/ERC2/CHRNA4/STX3/GIPC1
GO:0097480	establishment of synaptic vesicle localization	7/394	126/17913	0.0214366	0.369984	0.344452	7	10239/9066/112755/26059/1137/6809/10755	AP3S2/SYT7/STX1B/ERC2/CHRNA4/STX3/GIPC1
GO:1902905	positive regulation of supramolecular fiber organization	9/394	185/17913	0.0214942	0.369984	0.344452	9	28984/1902/5058/4690/56907/4088/22843/7046/4131	RGCC/LPAR1/PAK1/NCK1/SPIRE1/SMAD3/PPM1E/TGFBR1/MAP1B
GO:0006816	calcium ion transport	16/394	415/17913	0.0218862	0.369984	0.344452	16	5024/2905/378807/162514/2035/7225/8911/775/1137/779/8614/5142/8398/5144/283229/246329	P2RX3/GRIN2C/CATSPER4/TRPV3/EPB41/TRPC6/CACNA1I/CACNA1C/CHRNA4/CACNA1S/STC2/PDE4B/PLA2G6/PDE4D/CRACR2B/STAC3
GO:0090288	negative regulation of cellular response to growth factor stimulus	8/394	156/17913	0.0222304	0.369984	0.344452	8	9110/4088/64750/63976/348093/6497/7048/7046	MTMR4/SMAD3/SMURF2/PRDM16/RBPMS2/SKI/TGFBR2/TGFBR1
GO:0060078	regulation of postsynaptic membrane potential	7/394	127/17913	0.0222749	0.369984	0.344452	7	5024/54434/112755/2894/1137/2911/23613	P2RX3/SSH1/STX1B/GRID1/CHRNA4/GRM1/ZMYND8
GO:0003007	heart morphogenesis	11/394	249/17913	0.0223575	0.369984	0.344452	11	1954/6469/5915/4088/9249/6092/196528/1289/7048/7468/7046	MEGF8/SHH/RARB/SMAD3/DHRS3/ROBO2/ARID2/COL5A1/TGFBR2/NSD2/TGFBR1
GO:0043949	regulation of cAMP-mediated signaling	4/394	49/17913	0.022441	0.369984	0.344452	4	1902/10846/5144/2695	LPAR1/PDE10A/PDE4D/GIP
GO:0070306	lens fiber cell differentiation	3/394	28/17913	0.0230263	0.369984	0.344452	3	4916/4088/10818	NTRK3/SMAD3/FRS2
GO:2000406	positive regulation of T cell migration	3/394	28/17913	0.0230263	0.369984	0.344452	3	81704/6693/27347	DOCK8/SPN/STK39
GO:0016079	synaptic vesicle exocytosis	6/394	100/17913	0.0230607	0.369984	0.344452	6	9066/112755/26059/1137/6809/10755	SYT7/STX1B/ERC2/CHRNA4/STX3/GIPC1
GO:0014013	regulation of gliogenesis	7/394	128/17913	0.0231356	0.369984	0.344452	7	9948/128853/6469/26011/4916/1605/6497	WDR1/DUSP15/SHH/TENM4/NTRK3/DAG1/SKI
GO:0014870	response to muscle inactivity	2/394	11/17913	0.0232761	0.369984	0.344452	2	9110/1605	MTMR4/DAG1
GO:0021521	ventral spinal cord interneuron specification	2/394	11/17913	0.0232761	0.369984	0.344452	2	8022/2736	LHX3/GLI2
GO:0033089	positive regulation of T cell differentiation in thymus	2/394	11/17913	0.0232761	0.369984	0.344452	2	6469/2736	SHH/GLI2
GO:0033235	positive regulation of protein sumoylation	2/394	11/17913	0.0232761	0.369984	0.344452	2	51588/405	PIAS4/ARNT
GO:0045217	cell-cell junction maintenance	2/394	11/17913	0.0232761	0.369984	0.344452	2	144100/3801	PLEKHA7/KIFC3
GO:0048548	regulation of pinocytosis	2/394	11/17913	0.0232761	0.369984	0.344452	2	112755/55198	STX1B/APPL2
GO:0060573	cell fate specification involved in pattern specification	2/394	11/17913	0.0232761	0.369984	0.344452	2	8022/2736	LHX3/GLI2
GO:1901077	regulation of relaxation of muscle	2/394	11/17913	0.0232761	0.369984	0.344452	2	5142/5144	PDE4B/PDE4D
GO:1901201	regulation of extracellular matrix assembly	2/394	11/17913	0.0232761	0.369984	0.344452	2	28984/4088	RGCC/SMAD3
GO:1904263	positive regulation of TORC1 signaling	2/394	11/17913	0.0232761	0.369984	0.344452	2	84861/81929	KLHL22/SEH1L
GO:2001269	positive regulation of cysteine-type endopeptidase activity involved in apoptotic signaling pathway	2/394	11/17913	0.0232761	0.369984	0.344452	2	4088/9705	SMAD3/ST18
GO:0010721	negative regulation of cell development	13/394	317/17913	0.0237452	0.372977	0.347239	13	9289/6469/112755/55198/1902/5058/7225/7143/4916/9745/6497/1840/6911	ADGRG1/SHH/STX1B/APPL2/LPAR1/PAK1/TRPC6/TNR/NTRK3/ZNF536/SKI/DTX1/TBX6
GO:0010718	positive regulation of epithelial to mesenchymal transition	4/394	50/17913	0.023982	0.372977	0.347239	4	28984/4088/7048/7046	RGCC/SMAD3/TGFBR2/TGFBR1
GO:2000179	positive regulation of neural precursor cell proliferation	4/394	50/17913	0.023982	0.372977	0.347239	4	9289/6469/2736/27185	ADGRG1/SHH/GLI2/DISC1
GO:0018107	peptidyl-threonine phosphorylation	6/394	101/17913	0.0240798	0.372977	0.347239	6	22853/27347/7225/7048/7046/1859	LMTK2/STK39/TRPC6/TGFBR2/TGFBR1/DYRK1A
GO:0019233	sensory perception of pain	6/394	101/17913	0.0240798	0.372977	0.347239	6	5024/50801/1137/1740/2911/2695	P2RX3/KCNK4/CHRNA4/DLG2/GRM1/GIP
GO:0016126	sterol biosynthetic process	5/394	75/17913	0.0247006	0.372977	0.347239	5	10449/2194/3930/406959/6721	ACAA2/FASN/LBR/MIR183/SREBF2
GO:0048678	response to axon injury	5/394	75/17913	0.0247006	0.372977	0.347239	5	7143/4916/1605/4131/2695	TNR/NTRK3/DAG1/MAP1B/GIP
GO:0010644	cell communication by electrical coupling	3/394	29/17913	0.0252744	0.372977	0.347239	3	775/1627/5144	CACNA1C/DBN1/PDE4D
GO:0030970	retrograde protein transport, ER to cytosol	3/394	29/17913	0.0252744	0.372977	0.347239	3	81502/79139/55666	HM13/DERL1/NPLOC4
GO:0070723	response to cholesterol	3/394	29/17913	0.0252744	0.372977	0.347239	3	1605/7048/7046	DAG1/TGFBR2/TGFBR1
GO:0097106	postsynaptic density organization	3/394	29/17913	0.0252744	0.372977	0.347239	3	4916/1740/23613	NTRK3/DLG2/ZMYND8
GO:1903513	endoplasmic reticulum to cytosol transport	3/394	29/17913	0.0252744	0.372977	0.347239	3	81502/79139/55666	HM13/DERL1/NPLOC4
GO:1903539	protein localization to postsynaptic membrane	3/394	29/17913	0.0252744	0.372977	0.347239	3	2905/1605/1740	GRIN2C/DAG1/DLG2
GO:0045785	positive regulation of cell adhesion	15/394	388/17913	0.0253761	0.372977	0.347239	15	9289/81704/30835/6469/2736/5058/27185/463/4690/1605/4088/7048/8613/6809/10076	ADGRG1/DOCK8/CD209/SHH/GLI2/PAK1/DISC1/ZFHX3/NCK1/DAG1/SMAD3/TGFBR2/PLPP3/STX3/PTPRU
GO:0050803	regulation of synapse structure or activity	10/394	222/17913	0.0254731	0.372977	0.347239	10	54434/112755/27185/4916/1605/6092/23613/575/1627/23769	SSH1/STX1B/DISC1/NTRK3/DAG1/ROBO2/ZMYND8/ADGRB1/DBN1/FLRT1
GO:0072132	mesenchyme morphogenesis	4/394	51/17913	0.0255856	0.372977	0.347239	4	4088/6092/7048/7046	SMAD3/ROBO2/TGFBR2/TGFBR1
GO:0007224	smoothened signaling pathway	7/394	131/17913	0.0258548	0.372977	0.347239	7	730094/1954/6469/5167/2736/9742/7048	MOSMO/MEGF8/SHH/ENPP1/GLI2/IFT140/TGFBR2
GO:0003281	ventricular septum development	5/394	76/17913	0.0259801	0.372977	0.347239	5	6092/10818/7048/7468/7046	ROBO2/FRS2/TGFBR2/NSD2/TGFBR1
GO:0071902	positive regulation of protein serine/threonine kinase activity	13/394	322/17913	0.0265306	0.372977	0.347239	13	28984/4293/54757/6788/27347/1902/5058/4916/9802/2911/10818/4217/7046	RGCC/MAP3K9/FAM20A/STK3/STK39/LPAR1/PAK1/NTRK3/DAZAP2/GRM1/FRS2/MAP3K5/TGFBR1
GO:0048565	digestive tract development	7/394	132/17913	0.0268077	0.372977	0.347239	7	1954/6469/2736/5915/4088/348093/7048	MEGF8/SHH/GLI2/RARB/SMAD3/RBPMS2/TGFBR2
GO:0032409	regulation of transporter activity	11/394	257/17913	0.027372	0.372977	0.347239	11	27347/7225/338440/1740/3746/5142/11060/8398/5144/57554/246329	STK39/TRPC6/ANO9/DLG2/KCNC1/PDE4B/WWP2/PLA2G6/PDE4D/LRRC7/STAC3
GO:0000722	telomere maintenance via recombination	2/394	12/17913	0.0275306	0.372977	0.347239	2	286053/2067	NSMCE2/ERCC1
GO:0007077	mitotic nuclear envelope disassembly	2/394	12/17913	0.0275306	0.372977	0.347239	2	10783/255919	NEK6/CNEP1R1
GO:0016082	synaptic vesicle priming	2/394	12/17913	0.0275306	0.372977	0.347239	2	112755/26059	STX1B/ERC2
GO:0017121	phospholipid scrambling	2/394	12/17913	0.0275306	0.372977	0.347239	2	338440/63982	ANO9/ANO3
GO:0021520	spinal cord motor neuron cell fate specification	2/394	12/17913	0.0275306	0.372977	0.347239	2	8022/2736	LHX3/GLI2
GO:0030157	pancreatic juice secretion	2/394	12/17913	0.0275306	0.372977	0.347239	2	1056/27347	CEL/STK39
GO:0034086	maintenance of sister chromatid cohesion	2/394	12/17913	0.0275306	0.372977	0.347239	2	84250/286053	SLF1/NSMCE2
GO:0034088	maintenance of mitotic sister chromatid cohesion	2/394	12/17913	0.0275306	0.372977	0.347239	2	84250/286053	SLF1/NSMCE2
GO:0055062	phosphate ion homeostasis	2/394	12/17913	0.0275306	0.372977	0.347239	2	6569/5167	SLC34A1/ENPP1
GO:0060442	branching involved in prostate gland morphogenesis	2/394	12/17913	0.0275306	0.372977	0.347239	2	6469/10818	SHH/FRS2
GO:0071257	cellular response to electrical stimulus	2/394	12/17913	0.0275306	0.372977	0.347239	2	26012/2911	NSMF/GRM1
GO:0072505	divalent inorganic anion homeostasis	2/394	12/17913	0.0275306	0.372977	0.347239	2	6569/5167	SLC34A1/ENPP1
GO:0072506	trivalent inorganic anion homeostasis	2/394	12/17913	0.0275306	0.372977	0.347239	2	6569/5167	SLC34A1/ENPP1
GO:0099633	protein localization to postsynaptic specialization membrane	2/394	12/17913	0.0275306	0.372977	0.347239	2	1605/1740	DAG1/DLG2
GO:0099645	neurotransmitter receptor localization to postsynaptic specialization membrane	2/394	12/17913	0.0275306	0.372977	0.347239	2	1605/1740	DAG1/DLG2
GO:0021772	olfactory bulb development	3/394	30/17913	0.0276362	0.372977	0.347239	3	6092/6497/1943	ROBO2/SKI/EFNA2
GO:0045879	negative regulation of smoothened signaling pathway	3/394	30/17913	0.0276362	0.372977	0.347239	3	730094/1954/5167	MOSMO/MEGF8/ENPP1
GO:0071539	protein localization to centrosome	3/394	30/17913	0.0276362	0.372977	0.347239	3	55722/27185/55968	CEP72/DISC1/NSFL1C
GO:0090075	relaxation of muscle	3/394	30/17913	0.0276362	0.372977	0.347239	3	5592/5142/5144	PRKG1/PDE4B/PDE4D
GO:2000781	positive regulation of double-strand break repair	3/394	30/17913	0.0276362	0.372977	0.347239	3	84250/23514/56907	SLF1/SPIDR/SPIRE1
GO:0001655	urogenital system development	13/394	324/17913	0.0277095	0.372977	0.347239	13	6569/23371/6469/2736/9742/5915/4088/10409/6092/10818/80000/7046/56998	SLC34A1/TNS2/SHH/GLI2/IFT140/RARB/SMAD3/BASP1/ROBO2/FRS2/GREB1L/TGFBR1/CTNNBIP1
GO:0009135	purine nucleoside diphosphate metabolic process	7/394	133/17913	0.0277843	0.372977	0.347239	7	5213/8086/81929/3098/9611/1740/405	PFKM/AAAS/SEH1L/HK1/NCOR1/DLG2/ARNT
GO:0009179	purine ribonucleoside diphosphate metabolic process	7/394	133/17913	0.0277843	0.372977	0.347239	7	5213/8086/81929/3098/9611/1740/405	PFKM/AAAS/SEH1L/HK1/NCOR1/DLG2/ARNT
GO:0072001	renal system development	12/394	291/17913	0.0280449	0.37515	0.349262	12	6569/23371/6469/2736/9742/5915/4088/10409/6092/80000/7046/56998	SLC34A1/TNS2/SHH/GLI2/IFT140/RARB/SMAD3/BASP1/ROBO2/GREB1L/TGFBR1/CTNNBIP1
GO:0007264	small GTPase mediated signal transduction	17/394	465/17913	0.0289527	0.385935	0.359302	17	5900/9289/81704/9649/1121/84904/1902/9938/152273/5337/23263/153478/50650/9901/22800/54453/57568	RALGDS/ADGRG1/DOCK8/RALGPS1/CHM/ARHGEF39/LPAR1/ARHGAP25/FGD5/PLD1/MCF2L/PLEKHG4B/ARHGEF3/SRGAP3/RRAS2/RIN2/SIPA1L2
GO:0048285	organelle fission	15/394	395/17913	0.0291023	0.386572	0.359895	15	84687/10783/54461/28984/84861/84250/8086/81929/56907/286053/157777/79703/55968/5573/285498	PPP1R9B/NEK6/FBXW5/RGCC/KLHL22/SLF1/AAAS/SEH1L/SPIRE1/NSMCE2/MCMDC2/C11orf80/NSFL1C/PRKAR1A/RNF212
GO:0055017	cardiac muscle tissue growth	6/394	106/17913	0.0296277	0.388007	0.361232	6	5058/26011/196528/5573/7048/7046	PAK1/TENM4/ARID2/PRKAR1A/TGFBR2/TGFBR1
GO:0009185	ribonucleoside diphosphate metabolic process	7/394	135/17913	0.0298093	0.388007	0.361232	7	5213/8086/81929/3098/9611/1740/405	PFKM/AAAS/SEH1L/HK1/NCOR1/DLG2/ARNT
GO:0018279	protein N-linked glycosylation via asparagine	3/394	31/17913	0.0301114	0.388007	0.361232	3	90411/1650/4249	MCFD2/DDOST/MGAT5
GO:0021988	olfactory lobe development	3/394	31/17913	0.0301114	0.388007	0.361232	3	6092/6497/1943	ROBO2/SKI/EFNA2
GO:0099084	postsynaptic specialization organization	3/394	31/17913	0.0301114	0.388007	0.361232	3	4916/1740/23613	NTRK3/DLG2/ZMYND8
GO:1900077	negative regulation of cellular response to insulin stimulus	3/394	31/17913	0.0301114	0.388007	0.361232	3	5167/55198/4690	ENPP1/APPL2/NCK1
GO:1905508	protein localization to microtubule organizing center	3/394	31/17913	0.0301114	0.388007	0.361232	3	55722/27185/55968	CEP72/DISC1/NSFL1C
GO:0043161	proteasome-mediated ubiquitin-dependent protein catabolic process	13/394	328/17913	0.0301818	0.388007	0.361232	13	54461/84861/6469/101927423/2272/11124/23194/84937/79139/55666/11060/10755/29843	FBXW5/KLHL22/SHH/PANO1/FHIT/FAF1/FBXL7/ZNRF1/DERL1/NPLOC4/WWP2/GIPC1/SENP1
GO:0030307	positive regulation of cell growth	8/394	166/17913	0.0306979	0.388007	0.361232	8	1954/84861/5058/27185/55031/4916/7046/4131	MEGF8/KLHL22/PAK1/DISC1/USP47/NTRK3/TGFBR1/MAP1B
GO:0051017	actin filament bundle assembly	7/394	136/17913	0.0308581	0.388007	0.361232	7	28984/1902/5058/56907/4088/22843/7046	RGCC/LPAR1/PAK1/SPIRE1/SMAD3/PPM1E/TGFBR1
GO:0009798	axis specification	5/394	80/17913	0.0315178	0.388007	0.361232	5	6469/10409/10818/6497/6911	SHH/BASP1/FRS2/SKI/TBX6
GO:0110110	positive regulation of animal organ morphogenesis	5/394	80/17913	0.0315178	0.388007	0.361232	5	10409/6092/10818/7048/7046	BASP1/ROBO2/FRS2/TGFBR2/TGFBR1
GO:1903363	negative regulation of cellular protein catabolic process	5/394	80/17913	0.0315178	0.388007	0.361232	5	6469/101927423/2272/10755/29843	SHH/PANO1/FHIT/GIPC1/SENP1
GO:0061572	actin filament bundle organization	7/394	137/17913	0.0319315	0.388007	0.361232	7	28984/1902/5058/56907/4088/22843/7046	RGCC/LPAR1/PAK1/SPIRE1/SMAD3/PPM1E/TGFBR1
GO:0097479	synaptic vesicle localization	7/394	137/17913	0.0319315	0.388007	0.361232	7	10239/9066/112755/26059/1137/6809/10755	AP3S2/SYT7/STX1B/ERC2/CHRNA4/STX3/GIPC1
GO:0014745	negative regulation of muscle adaptation	2/394	13/17913	0.0320701	0.388007	0.361232	2	4088/3488	SMAD3/IGFBP5
GO:0018410	C-terminal protein amino acid modification	2/394	13/17913	0.0320701	0.388007	0.361232	2	84871/123624	AGBL4/AGBL1
GO:0021978	telencephalon regionalization	2/394	13/17913	0.0320701	0.388007	0.361232	2	9289/6469	ADGRG1/SHH
GO:0030011	maintenance of cell polarity	2/394	13/17913	0.0320701	0.388007	0.361232	2	9948/286	WDR1/ANK1
GO:0032754	positive regulation of interleukin-5 production	2/394	13/17913	0.0320701	0.388007	0.361232	2	85480/5144	TSLP/PDE4D
GO:0034331	cell junction maintenance	2/394	13/17913	0.0320701	0.388007	0.361232	2	144100/3801	PLEKHA7/KIFC3
GO:0038092	nodal signaling pathway	2/394	13/17913	0.0320701	0.388007	0.361232	2	6469/4088	SHH/SMAD3
GO:0060601	lateral sprouting from an epithelium	2/394	13/17913	0.0320701	0.388007	0.361232	2	6469/2736	SHH/GLI2
GO:0062033	positive regulation of mitotic sister chromatid segregation	2/394	13/17913	0.0320701	0.388007	0.361232	2	84250/286053	SLF1/NSMCE2
GO:0071872	cellular response to epinephrine stimulus	2/394	13/17913	0.0320701	0.388007	0.361232	2	5142/5144	PDE4B/PDE4D
GO:0106074	aminoacyl-tRNA metabolism involved in translational fidelity	2/394	13/17913	0.0320701	0.388007	0.361232	2	92675/23395	DTD1/LARS2
GO:1903960	negative regulation of anion transmembrane transport	2/394	13/17913	0.0320701	0.388007	0.361232	2	27347/338440	STK39/ANO9
GO:2001256	regulation of store-operated calcium entry	2/394	13/17913	0.0320701	0.388007	0.361232	2	8614/283229	STC2/CRACR2B
GO:0018105	peptidyl-serine phosphorylation	10/394	231/17913	0.0322347	0.388204	0.361415	10	22853/10783/27347/5058/4916/4690/7048/7046/5144/1859	LMTK2/NEK6/STK39/PAK1/NTRK3/NCK1/TGFBR2/TGFBR1/PDE4D/DYRK1A
GO:0000422	autophagy of mitochondrion	4/394	55/17913	0.0326336	0.388204	0.361415	4	84557/6721/55626/55187	MAP1LC3A/SREBF2/AMBRA1/VPS13D
GO:0031102	neuron projection regeneration	4/394	55/17913	0.0326336	0.388204	0.361415	4	7143/4916/1605/4131	TNR/NTRK3/DAG1/MAP1B
GO:0061726	mitochondrion disassembly	4/394	55/17913	0.0326336	0.388204	0.361415	4	84557/6721/55626/55187	MAP1LC3A/SREBF2/AMBRA1/VPS13D
GO:0018196	peptidyl-asparagine modification	3/394	32/17913	0.0326995	0.388204	0.361415	3	90411/1650/4249	MCFD2/DDOST/MGAT5
GO:0021522	spinal cord motor neuron differentiation	3/394	32/17913	0.0326995	0.388204	0.361415	3	8022/6469/2736	LHX3/SHH/GLI2
GO:0030336	negative regulation of cell migration	13/394	332/17913	0.0328108	0.388312	0.361516	13	11314/9289/28984/83481/6469/5797/1605/3488/5592/23613/575/196528/10076	CD300A/ADGRG1/RGCC/EPPK1/SHH/PTPRM/DAG1/IGFBP5/PRKG1/ZMYND8/ADGRB1/ARID2/PTPRU
GO:0006303	double-strand break repair via nonhomologous end joining	5/394	81/17913	0.0330089	0.388481	0.361673	5	7405/51588/8924/7468/2067	UVRAG/PIAS4/HERC2/NSD2/ERCC1
GO:0010770	positive regulation of cell morphogenesis involved in differentiation	7/394	138/17913	0.0330296	0.388481	0.361673	7	1954/5058/27185/4916/6092/1627/4131	MEGF8/PAK1/DISC1/NTRK3/ROBO2/DBN1/MAP1B
GO:0018210	peptidyl-threonine modification	6/394	109/17913	0.0333284	0.390786	0.363819	6	22853/27347/7225/7048/7046/1859	LMTK2/STK39/TRPC6/TGFBR2/TGFBR1/DYRK1A
GO:0022408	negative regulation of cell-cell adhesion	8/394	169/17913	0.033618	0.392968	0.365851	8	11314/28984/6693/6469/7143/5592/5573/1840	CD300A/RGCC/SPN/SHH/TNR/PRKG1/PRKAR1A/DTX1
GO:0006096	glycolytic process	6/394	110/17913	0.0346255	0.402344	0.37458	6	5213/8086/81929/3098/9611/405	PFKM/AAAS/SEH1L/HK1/NCOR1/ARNT
GO:0003205	cardiac chamber development	8/394	170/17913	0.0346319	0.402344	0.37458	8	5915/9249/6092/10818/80000/7048/7468/7046	RARB/DHRS3/ROBO2/FRS2/GREB1L/TGFBR2/NSD2/TGFBR1
GO:0072073	kidney epithelium development	7/394	140/17913	0.0353007	0.406036	0.378017	7	6469/5915/4088/10409/6092/80000/56998	SHH/RARB/SMAD3/BASP1/ROBO2/GREB1L/CTNNBIP1
GO:0010922	positive regulation of phosphatase activity	3/394	33/17913	0.0353997	0.406036	0.378017	3	11314/133522/4088	CD300A/PPARGC1B/SMAD3
GO:0036314	response to sterol	3/394	33/17913	0.0353997	0.406036	0.378017	3	1605/7048/7046	DAG1/TGFBR2/TGFBR1
GO:0048665	neuron fate specification	3/394	33/17913	0.0353997	0.406036	0.378017	3	8022/2736/4916	LHX3/GLI2/NTRK3
GO:0043433	negative regulation of DNA-binding transcription factor activity	8/394	171/17913	0.0356664	0.406036	0.378017	8	84166/51588/11124/284434/4601/11060/6911/56998	NLRC5/PIAS4/FAF1/NWD1/MXI1/WWP2/TBX6/CTNNBIP1
GO:0030900	forebrain development	14/394	371/17913	0.0358223	0.406036	0.378017	14	9289/8022/6469/2736/1902/27185/7143/5915/5592/6092/10818/6497/1943/3746	ADGRG1/LHX3/SHH/GLI2/LPAR1/DISC1/TNR/RARB/PRKG1/ROBO2/FRS2/SKI/EFNA2/KCNC1
GO:0006757	ATP generation from ADP	6/394	111/17913	0.0359548	0.406036	0.378017	6	5213/8086/81929/3098/9611/405	PFKM/AAAS/SEH1L/HK1/NCOR1/ARNT
GO:1904019	epithelial cell apoptotic process	6/394	111/17913	0.0359548	0.406036	0.378017	6	28984/6788/51588/80781/4217/7048	RGCC/STK3/PIAS4/COL18A1/MAP3K5/TGFBR2
GO:0032147	activation of protein kinase activity	12/394	303/17913	0.0365342	0.406036	0.378017	12	11314/28984/4293/27347/1902/4916/2911/10818/4217/5573/7048/7046	CD300A/RGCC/MAP3K9/STK39/LPAR1/NTRK3/GRM1/FRS2/MAP3K5/PRKAR1A/TGFBR2/TGFBR1
GO:0032507	maintenance of protein location in cell	4/394	57/17913	0.0365421	0.406036	0.378017	4	3098/9913/1605/1627	HK1/SUPT7L/DAG1/DBN1
GO:0033047	regulation of mitotic sister chromatid segregation	4/394	57/17913	0.0365421	0.406036	0.378017	4	10783/84861/84250/286053	NEK6/KLHL22/SLF1/NSMCE2
GO:0014854	response to inactivity	2/394	14/17913	0.0368802	0.406036	0.378017	2	9110/1605	MTMR4/DAG1
GO:0043558	regulation of translational initiation in response to stress	2/394	14/17913	0.0368802	0.406036	0.378017	2	27102/4690	EIF2AK1/NCK1
GO:0060099	regulation of phagocytosis, engulfment	2/394	14/17913	0.0368802	0.406036	0.378017	2	11314/55198	CD300A/APPL2
GO:0070166	enamel mineralization	2/394	14/17913	0.0368802	0.406036	0.378017	2	26504/54757	CNNM4/FAM20A
GO:0099558	maintenance of synapse structure	2/394	14/17913	0.0368802	0.406036	0.378017	2	26059/1740	ERC2/DLG2
GO:1901626	regulation of postsynaptic membrane organization	2/394	14/17913	0.0368802	0.406036	0.378017	2	54434/23613	SSH1/ZMYND8
GO:1902043	positive regulation of extrinsic apoptotic signaling pathway via death domain receptors	2/394	14/17913	0.0368802	0.406036	0.378017	2	6788/11124	STK3/FAF1
GO:0048705	skeletal system morphogenesis	9/394	204/17913	0.0369804	0.406036	0.378017	9	1954/133522/9742/5915/4088/9249/6497/7048/7046	MEGF8/PPARGC1B/IFT140/RARB/SMAD3/DHRS3/SKI/TGFBR2/TGFBR1
GO:0140014	mitotic nuclear division	10/394	237/17913	0.037389	0.40934	0.381092	10	84687/10783/54461/28984/84861/84250/8086/81929/286053/55968	PPP1R9B/NEK6/FBXW5/RGCC/KLHL22/SLF1/AAAS/SEH1L/NSMCE2/NSFL1C
GO:0043547	positive regulation of GTPase activity	13/394	339/17913	0.0378029	0.412681	0.384203	13	10297/81704/1121/60682/9938/4916/5902/9628/8601/10483/9901/54453/57568	APC2/DOCK8/CHM/SMAP1/ARHGAP25/NTRK3/RANBP1/RGS6/RGS20/SEC23B/SRGAP3/RIN2/SIPA1L2
GO:0007131	reciprocal meiotic recombination	3/394	34/17913	0.0382113	0.413254	0.384736	3	157777/79703/285498	MCMDC2/C11orf80/RNF212
GO:0010464	regulation of mesenchymal cell proliferation	3/394	34/17913	0.0382113	0.413254	0.384736	3	6469/7048/56998	SHH/TGFBR2/CTNNBIP1
GO:2000403	positive regulation of lymphocyte migration	3/394	34/17913	0.0382113	0.413254	0.384736	3	81704/6693/27347	DOCK8/SPN/STK39
GO:0046847	filopodium assembly	4/394	58/17913	0.0385932	0.413254	0.384736	4	84687/152273/23613/7046	PPP1R9B/FGD5/ZMYND8/TGFBR1
GO:0018205	peptidyl-lysine modification	14/394	376/17913	0.0393618	0.413254	0.384736	14	51588/8086/81929/9913/286053/79903/55209/63976/23410/7468/8110/285498/405/29843	PIAS4/AAAS/SEH1L/SUPT7L/NSMCE2/NAA60/SETD5/PRDM16/SIRT3/NSD2/DPF3/RNF212/ARNT/SENP1
GO:0014910	regulation of smooth muscle cell migration	5/394	85/17913	0.039408	0.413254	0.384736	5	54434/1902/5058/3488/5592	SSH1/LPAR1/PAK1/IGFBP5/PRKG1
GO:0048704	embryonic skeletal system morphogenesis	5/394	85/17913	0.039408	0.413254	0.384736	5	1954/9742/4088/7048/7046	MEGF8/IFT140/SMAD3/TGFBR2/TGFBR1
GO:0072507	divalent inorganic cation homeostasis	15/394	412/17913	0.0398136	0.413254	0.384736	15	5024/2905/26504/54757/797/1258/1902/7225/27185/775/4088/8614/2911/8398/5144	P2RX3/GRIN2C/CNNM4/FAM20A/CALCB/CNGB1/LPAR1/TRPC6/DISC1/CACNA1C/SMAD3/STC2/GRM1/PLA2G6/PDE4D
GO:0040013	negative regulation of locomotion	14/394	377/17913	0.0400986	0.413254	0.384736	14	11314/9289/28984/83481/6469/5797/1605/3488/5592/6092/23613/575/196528/10076	CD300A/ADGRG1/RGCC/EPPK1/SHH/PTPRM/DAG1/IGFBP5/PRKG1/ROBO2/ZMYND8/ADGRB1/ARID2/PTPRU
GO:0001654	eye development	13/394	342/17913	0.0400997	0.413254	0.384736	13	6469/4916/9742/5797/775/5915/4088/10818/6497/1289/7048/7399/7046	SHH/NTRK3/IFT140/PTPRM/CACNA1C/RARB/SMAD3/FRS2/SKI/COL5A1/TGFBR2/USH2A/TGFBR1
GO:0042866	pyruvate biosynthetic process	6/394	114/17913	0.0401375	0.413254	0.384736	6	5213/8086/81929/3098/9611/405	PFKM/AAAS/SEH1L/HK1/NCOR1/ARNT
GO:0061351	neural precursor cell proliferation	7/394	144/17913	0.0401478	0.413254	0.384736	7	9289/6469/55198/27185/9833/10818/1627	ADGRG1/SHH/APPL2/DISC1/MELK/FRS2/DBN1
GO:0045843	negative regulation of striated muscle tissue development	4/394	59/17913	0.0407088	0.413254	0.384736	4	55553/5058/10818/7048	SOX6/PAK1/FRS2/TGFBR2
GO:2000177	regulation of neural precursor cell proliferation	5/394	86/17913	0.0411176	0.413254	0.384736	5	9289/6469/55198/2736/27185	ADGRG1/SHH/APPL2/GLI2/DISC1
GO:0006836	neurotransmitter transport	10/394	241/17913	0.0411266	0.413254	0.384736	10	9066/57153/112755/5799/26059/1137/54716/6809/79751/10755	SYT7/SLC44A2/STX1B/PTPRN2/ERC2/CHRNA4/SLC6A20/STX3/SLC25A22/GIPC1
GO:0003203	endocardial cushion morphogenesis	3/394	35/17913	0.0411332	0.413254	0.384736	3	6092/7048/7046	ROBO2/TGFBR2/TGFBR1
GO:0035825	homologous recombination	3/394	35/17913	0.0411332	0.413254	0.384736	3	157777/79703/285498	MCMDC2/C11orf80/RNF212
GO:0060416	response to growth hormone	3/394	35/17913	0.0411332	0.413254	0.384736	3	6569/55777/3488	SLC34A1/MBD5/IGFBP5
GO:0048736	appendage development	8/394	176/17913	0.0411518	0.413254	0.384736	8	1954/6469/1889/2736/9742/775/5915/6497	MEGF8/SHH/ECE1/GLI2/IFT140/CACNA1C/RARB/SKI
GO:0060173	limb development	8/394	176/17913	0.0411518	0.413254	0.384736	8	1954/6469/1889/2736/9742/775/5915/6497	MEGF8/SHH/ECE1/GLI2/IFT140/CACNA1C/RARB/SKI
GO:0046165	alcohol biosynthetic process	7/394	145/17913	0.0414241	0.413254	0.384736	7	10449/2194/3930/406959/6721/3612/253430	ACAA2/FASN/LBR/MIR183/SREBF2/IMPA1/IPMK
GO:0072525	pyridine-containing compound biosynthetic process	7/394	145/17913	0.0414241	0.413254	0.384736	7	5213/8086/81929/3098/9611/405/8566	PFKM/AAAS/SEH1L/HK1/NCOR1/ARNT/PDXK
GO:0003417	growth plate cartilage development	2/394	15/17913	0.0419469	0.413254	0.384736	2	5915/7048	RARB/TGFBR2
GO:0007351	tripartite regional subdivision	2/394	15/17913	0.0419469	0.413254	0.384736	2	10409/10818	BASP1/FRS2
GO:0008595	anterior/posterior axis specification, embryo	2/394	15/17913	0.0419469	0.413254	0.384736	2	10409/10818	BASP1/FRS2
GO:0014874	response to stimulus involved in regulation of muscle adaptation	2/394	15/17913	0.0419469	0.413254	0.384736	2	9110/1605	MTMR4/DAG1
GO:0033540	fatty acid beta-oxidation using acyl-CoA oxidase	2/394	15/17913	0.0419469	0.413254	0.384736	2	55289/51	ACOXL/ACOX1
GO:0042994	cytoplasmic sequestering of transcription factor	2/394	15/17913	0.0419469	0.413254	0.384736	2	11124/4601	FAF1/MXI1
GO:0045475	locomotor rhythm	2/394	15/17913	0.0419469	0.413254	0.384736	2	463/9611	ZFHX3/NCOR1
GO:0060579	ventral spinal cord interneuron fate commitment	2/394	15/17913	0.0419469	0.413254	0.384736	2	8022/2736	LHX3/GLI2
GO:0060581	cell fate commitment involved in pattern specification	2/394	15/17913	0.0419469	0.413254	0.384736	2	8022/2736	LHX3/GLI2
GO:0072075	metanephric mesenchyme development	2/394	15/17913	0.0419469	0.413254	0.384736	2	6469/10409	SHH/BASP1
GO:0090136	epithelial cell-cell adhesion	2/394	15/17913	0.0419469	0.413254	0.384736	2	144100/3801	PLEKHA7/KIFC3
GO:1903358	regulation of Golgi organization	2/394	15/17913	0.0419469	0.413254	0.384736	2	53407/23271	STX18/CAMSAP2
GO:1905153	regulation of membrane invagination	2/394	15/17913	0.0419469	0.413254	0.384736	2	11314/55198	CD300A/APPL2
GO:1905874	regulation of postsynaptic density organization	2/394	15/17913	0.0419469	0.413254	0.384736	2	4916/23613	NTRK3/ZMYND8
GO:2000047	regulation of cell-cell adhesion mediated by cadherin	2/394	15/17913	0.0419469	0.413254	0.384736	2	28984/10076	RGCC/PTPRU
GO:0007601	visual perception	9/394	209/17913	0.0420712	0.413254	0.384736	9	26504/2978/1258/1121/80781/9249/2070/3801/7399	CNNM4/GUCA1A/CNGB1/CHM/COL18A1/DHRS3/EYA4/KIFC3/USH2A
GO:0001822	kidney development	11/394	276/17913	0.0424412	0.413254	0.384736	11	6569/23371/6469/2736/5915/4088/10409/6092/80000/7046/56998	SLC34A1/TNS2/SHH/GLI2/RARB/SMAD3/BASP1/ROBO2/GREB1L/TGFBR1/CTNNBIP1
GO:1990778	protein localization to cell periphery	11/394	276/17913	0.0424412	0.413254	0.384736	11	129303/2905/2035/1804/286/1605/2042/1740/6809/57217/246329	TMEM150A/GRIN2C/EPB41/DPP6/ANK1/DAG1/EPHA3/DLG2/STX3/TTC7A/STAC3
GO:0048754	branching morphogenesis of an epithelial tube	7/394	146/17913	0.0427264	0.413254	0.384736	7	6469/2736/5058/1605/80000/7048/56998	SHH/GLI2/PAK1/DAG1/GREB1L/TGFBR2/CTNNBIP1
GO:0007215	glutamate receptor signaling pathway	5/394	87/17913	0.0428714	0.413254	0.384736	5	2905/2894/1740/2911/57554	GRIN2C/GRID1/DLG2/GRM1/LRRC7
GO:0016266	O-glycan processing	4/394	60/17913	0.0428892	0.413254	0.384736	4	4584/6483/6482/117248	MUC3A/ST3GAL2/ST3GAL1/GALNT15
GO:0048635	negative regulation of muscle organ development	4/394	60/17913	0.0428892	0.413254	0.384736	4	55553/5058/10818/7048	SOX6/PAK1/FRS2/TGFBR2
GO:0051785	positive regulation of nuclear division	4/394	60/17913	0.0428892	0.413254	0.384736	4	28984/84250/286053/55968	RGCC/SLF1/NSMCE2/NSFL1C
GO:0022612	gland morphogenesis	6/394	116/17913	0.0430903	0.413254	0.384736	6	6469/2736/1605/3488/10818/7048	SHH/GLI2/DAG1/IGFBP5/FRS2/TGFBR2
GO:0046777	protein autophosphorylation	9/394	210/17913	0.0431433	0.413254	0.384736	9	22853/10783/27102/4293/5167/27347/5058/9833/1859	LMTK2/NEK6/EIF2AK1/MAP3K9/ENPP1/STK39/PAK1/MELK/DYRK1A
GO:0150063	visual system development	13/394	346/17913	0.0433135	0.413254	0.384736	13	6469/4916/9742/5797/775/5915/4088/10818/6497/1289/7048/7399/7046	SHH/NTRK3/IFT140/PTPRM/CACNA1C/RARB/SMAD3/FRS2/SKI/COL5A1/TGFBR2/USH2A/TGFBR1
GO:0061138	morphogenesis of a branching epithelium	8/394	178/17913	0.0434946	0.413254	0.384736	8	6469/2736/5058/1605/10818/80000/7048/56998	SHH/GLI2/PAK1/DAG1/FRS2/GREB1L/TGFBR2/CTNNBIP1
GO:0010498	proteasomal protein catabolic process	14/394	382/17913	0.0439305	0.413254	0.384736	14	54461/84861/6469/101927423/2272/11124/81502/23194/84937/79139/55666/11060/10755/29843	FBXW5/KLHL22/SHH/PANO1/FHIT/FAF1/HM13/FBXL7/ZNRF1/DERL1/NPLOC4/WWP2/GIPC1/SENP1
GO:0000187	activation of MAPK activity	7/394	147/17913	0.044055	0.413254	0.384736	7	4293/27347/1902/4916/2911/10818/4217	MAP3K9/STK39/LPAR1/NTRK3/GRM1/FRS2/MAP3K5
GO:0006310	DNA recombination	10/394	244/17913	0.0440925	0.413254	0.384736	10	23514/7374/125476/286053/157777/79703/54891/7468/2067/285498	SPIDR/UNG/INO80C/NSMCE2/MCMDC2/C11orf80/INO80D/NSD2/ERCC1/RNF212
GO:0045926	negative regulation of growth	10/394	244/17913	0.0440925	0.413254	0.384736	10	84687/6595/5167/6788/5058/7143/4088/3488/8614/7048	PPP1R9B/SMARCA2/ENPP1/STK3/PAK1/TNR/SMAD3/IGFBP5/STC2/TGFBR2
GO:2000146	negative regulation of cell motility	13/394	347/17913	0.0441444	0.413254	0.384736	13	11314/9289/28984/83481/6469/5797/1605/3488/5592/23613/575/196528/10076	CD300A/ADGRG1/RGCC/EPPK1/SHH/PTPRM/DAG1/IGFBP5/PRKG1/ZMYND8/ADGRB1/ARID2/PTPRU
GO:0000578	embryonic axis specification	3/394	36/17913	0.0441645	0.413254	0.384736	3	10409/10818/6911	BASP1/FRS2/TBX6
GO:0003156	regulation of animal organ formation	3/394	36/17913	0.0441645	0.413254	0.384736	3	6469/6092/10818	SHH/ROBO2/FRS2
GO:0008038	neuron recognition	3/394	36/17913	0.0441645	0.413254	0.384736	3	1954/2042/6092	MEGF8/EPHA3/ROBO2
GO:0009187	cyclic nucleotide metabolic process	3/394	36/17913	0.0441645	0.413254	0.384736	3	10846/5142/5144	PDE10A/PDE4B/PDE4D
GO:0048706	embryonic skeletal system development	6/394	117/17913	0.0446164	0.416456	0.387718	6	1954/6469/9742/4088/7048/7046	MEGF8/SHH/IFT140/SMAD3/TGFBR2/TGFBR1
GO:1902903	regulation of supramolecular fiber organization	12/394	313/17913	0.0448852	0.417925	0.389085	12	9948/28984/1902/5058/4690/56907/4088/23271/22843/7046/1859/4131	WDR1/RGCC/LPAR1/PAK1/NCK1/SPIRE1/SMAD3/CAMSAP2/PPM1E/TGFBR1/DYRK1A/MAP1B
GO:0042733	embryonic digit morphogenesis	4/394	61/17913	0.0451341	0.417925	0.389085	4	6469/1889/2736/9742	SHH/ECE1/GLI2/IFT140
GO:1904377	positive regulation of protein localization to cell periphery	4/394	61/17913	0.0451341	0.417925	0.389085	4	2035/2042/6809/246329	EPB41/EPHA3/STX3/STAC3
GO:0050953	sensory perception of light stimulus	9/394	213/17913	0.0464692	0.417925	0.389085	9	26504/2978/1258/1121/80781/9249/2070/3801/7399	CNNM4/GUCA1A/CNGB1/CHM/COL18A1/DHRS3/EYA4/KIFC3/USH2A
GO:0000726	non-recombinational repair	5/394	89/17913	0.0465124	0.417925	0.389085	5	7405/51588/8924/7468/2067	UVRAG/PIAS4/HERC2/NSD2/ERCC1
GO:0007269	neurotransmitter secretion	7/394	149/17913	0.0467913	0.417925	0.389085	7	9066/112755/5799/26059/1137/6809/10755	SYT7/STX1B/PTPRN2/ERC2/CHRNA4/STX3/GIPC1
GO:0016202	regulation of striated muscle tissue development	7/394	149/17913	0.0467913	0.417925	0.389085	7	55553/6469/5058/4088/10818/7048/7046	SOX6/SHH/PAK1/SMAD3/FRS2/TGFBR2/TGFBR1
GO:0002115	store-operated calcium entry	2/394	16/17913	0.0472566	0.417925	0.389085	2	8614/283229	STC2/CRACR2B
GO:0006450	regulation of translational fidelity	2/394	16/17913	0.0472566	0.417925	0.389085	2	92675/23395	DTD1/LARS2
GO:0007096	regulation of exit from mitosis	2/394	16/17913	0.0472566	0.417925	0.389085	2	84687/28984	PPP1R9B/RGCC
GO:0030397	membrane disassembly	2/394	16/17913	0.0472566	0.417925	0.389085	2	10783/255919	NEK6/CNEP1R1
GO:0031643	positive regulation of myelination	2/394	16/17913	0.0472566	0.417925	0.389085	2	26011/1605	TENM4/DAG1
GO:0035025	positive regulation of Rho protein signal transduction	2/394	16/17913	0.0472566	0.417925	0.389085	2	9289/1902	ADGRG1/LPAR1
GO:0046325	negative regulation of glucose import	2/394	16/17913	0.0472566	0.417925	0.389085	2	5167/55198	ENPP1/APPL2
GO:0048385	regulation of retinoic acid receptor signaling pathway	2/394	16/17913	0.0472566	0.417925	0.389085	2	9249/9745	DHRS3/ZNF536
GO:0051081	nuclear envelope disassembly	2/394	16/17913	0.0472566	0.417925	0.389085	2	10783/255919	NEK6/CNEP1R1
GO:0051482	positive regulation of cytosolic calcium ion concentration involved in phospholipase C-activating G protein-coupled signaling pathway	2/394	16/17913	0.0472566	0.417925	0.389085	2	1902/2911	LPAR1/GRM1
GO:0055119	relaxation of cardiac muscle	2/394	16/17913	0.0472566	0.417925	0.389085	2	5142/5144	PDE4B/PDE4D
GO:0060572	morphogenesis of an epithelial bud	2/394	16/17913	0.0472566	0.417925	0.389085	2	6469/2736	SHH/GLI2
GO:0071871	response to epinephrine	2/394	16/17913	0.0472566	0.417925	0.389085	2	5142/5144	PDE4B/PDE4D
GO:1903830	magnesium ion transmembrane transport	2/394	16/17913	0.0472566	0.417925	0.389085	2	26504/348938	CNNM4/NIPAL4
GO:0045494	photoreceptor cell maintenance	3/394	37/17913	0.0473039	0.417925	0.389085	3	1258/9696/7399	CNGB1/CROCC/USH2A
GO:0097120	receptor localization to synapse	3/394	37/17913	0.0473039	0.417925	0.389085	3	1605/1740/1627	DAG1/DLG2/DBN1
GO:0048880	sensory system development	13/394	351/17913	0.0475794	0.419383	0.390443	13	6469/4916/9742/5797/775/5915/4088/10818/6497/1289/7048/7399/7046	SHH/NTRK3/IFT140/PTPRM/CACNA1C/RARB/SMAD3/FRS2/SKI/COL5A1/TGFBR2/USH2A/TGFBR1
GO:0015698	inorganic anion transport	7/394	150/17913	0.0481994	0.422885	0.393703	7	6569/5167/1408/338440/7038/26266/55129	SLC34A1/ENPP1/CRY2/ANO9/TG/SLC13A4/ANO10
GO:0099643	signal release from synapse	7/394	150/17913	0.0481994	0.422885	0.393703	7	9066/112755/5799/26059/1137/6809/10755	SYT7/STX1B/PTPRN2/ERC2/CHRNA4/STX3/GIPC1
GO:0060349	bone morphogenesis	5/394	90/17913	0.0483998	0.423665	0.39443	5	1954/5915/9249/6497/7048	MEGF8/RARB/DHRS3/SKI/TGFBR2
GO:0055074	calcium ion homeostasis	14/394	388/17913	0.0488611	0.426721	0.397274	14	5024/2905/54757/797/1258/1902/7225/27185/775/4088/8614/2911/8398/5144	P2RX3/GRIN2C/FAM20A/CALCB/CNGB1/LPAR1/TRPC6/DISC1/CACNA1C/SMAD3/STC2/GRM1/PLA2G6/PDE4D
GO:0007568	aging	12/394	318/17913	0.0495211	0.431492	0.401716	12	10783/2879/7225/83719/1605/286053/3488/1284/23410/7048/2067/5144	NEK6/GPX4/TRPC6/YPEL3/DAG1/NSMCE2/IGFBP5/COL4A2/SIRT3/TGFBR2/ERCC1/PDE4D
GO:0009991	response to extracellular stimulus	17/394	498/17913	0.0497419	0.432093	0.402275	17	6569/84557/84687/5024/54434/27102/6721/55198/81929/55626/26153/8614/4217/7048/2067/4131/2695	SLC34A1/MAP1LC3A/PPP1R9B/P2RX3/SSH1/EIF2AK1/SREBF2/APPL2/SEH1L/AMBRA1/KIF26A/STC2/MAP3K5/TGFBR2/ERCC1/MAP1B/GIP
GO:0006487	protein N-linked glycosylation	4/394	63/17913	0.0498175	0.432093	0.402275	4	90411/6482/1650/4249	MCFD2/ST3GAL1/DDOST/MGAT5
GO:0048588	developmental cell growth	9/394	216/17913	0.0499617	0.432357	0.402521	9	1954/5058/27185/7143/4916/1808/7048/4131/23769	MEGF8/PAK1/DISC1/TNR/NTRK3/DPYSL2/TGFBR2/MAP1B/FLRT1
GO:0007009	plasma membrane organization	5/394	91/17913	0.0503318	0.433584	0.403664	5	9066/338440/63982/79628/1289	SYT7/ANO9/ANO3/SH3TC2/COL5A1
GO:0014909	smooth muscle cell migration	5/394	91/17913	0.0503318	0.433584	0.403664	5	54434/1902/5058/3488/5592	SSH1/LPAR1/PAK1/IGFBP5/PRKG1
GO:1904037	positive regulation of epithelial cell apoptotic process	3/394	38/17913	0.0505501	0.434479	0.404497	3	28984/51588/80781	RGCC/PIAS4/COL18A1
GO:0046031	ADP metabolic process	6/394	121/17913	0.051056	0.436028	0.405939	6	5213/8086/81929/3098/9611/405	PFKM/AAAS/SEH1L/HK1/NCOR1/ARNT
GO:0046718	viral entry into host cell	6/394	121/17913	0.051056	0.436028	0.405939	6	30835/7405/1605/3694/1508/11060	CD209/UVRAG/DAG1/ITGB6/CTSB/WWP2
GO:0061371	determination of heart left/right asymmetry	4/394	64/17913	0.0522556	0.436028	0.405939	4	1954/6469/4088/7048	MEGF8/SHH/SMAD3/TGFBR2
GO:0051235	maintenance of location	11/394	286/17913	0.0523235	0.436028	0.405939	11	6721/7405/5167/11124/3098/775/9913/1605/4601/1627/5144	SREBF2/UVRAG/ENPP1/FAF1/HK1/CACNA1C/SUPT7L/DAG1/MXI1/DBN1/PDE4D
GO:0060537	muscle tissue development	14/394	392/17913	0.0523549	0.436028	0.405939	14	55553/6469/5058/26011/5915/4088/3488/10818/196528/6497/5573/7048/7046/246329	SOX6/SHH/PAK1/TENM4/RARB/SMAD3/IGFBP5/FRS2/ARID2/SKI/PRKAR1A/TGFBR2/TGFBR1/STAC3
GO:0050807	regulation of synapse organization	9/394	218/17913	0.0523837	0.436028	0.405939	9	54434/27185/4916/1605/6092/23613/575/1627/23769	SSH1/DISC1/NTRK3/DAG1/ROBO2/ZMYND8/ADGRB1/DBN1/FLRT1
GO:0009132	nucleoside diphosphate metabolic process	7/394	153/17913	0.0525841	0.436028	0.405939	7	5213/8086/81929/3098/9611/1740/405	PFKM/AAAS/SEH1L/HK1/NCOR1/DLG2/ARNT
GO:0048634	regulation of muscle organ development	7/394	153/17913	0.0525841	0.436028	0.405939	7	55553/6469/5058/4088/10818/7048/7046	SOX6/SHH/PAK1/SMAD3/FRS2/TGFBR2/TGFBR1
GO:0018209	peptidyl-serine modification	10/394	252/17913	0.0527027	0.436028	0.405939	10	22853/10783/27347/5058/4916/4690/7048/7046/5144/1859	LMTK2/NEK6/STK39/PAK1/NTRK3/NCK1/TGFBR2/TGFBR1/PDE4D/DYRK1A
GO:0031023	microtubule organizing center organization	6/394	122/17913	0.0527502	0.436028	0.405939	6	9648/54461/7405/9696/55722/55968	GCC2/FBXW5/UVRAG/CROCC/CEP72/NSFL1C
GO:0003198	epithelial to mesenchymal transition involved in endocardial cushion formation	2/394	17/17913	0.0527963	0.436028	0.405939	2	7048/7046	TGFBR2/TGFBR1
GO:0015693	magnesium ion transport	2/394	17/17913	0.0527963	0.436028	0.405939	2	26504/348938	CNNM4/NIPAL4
GO:0021514	ventral spinal cord interneuron differentiation	2/394	17/17913	0.0527963	0.436028	0.405939	2	8022/2736	LHX3/GLI2
GO:0034629	cellular protein-containing complex localization	2/394	17/17913	0.0527963	0.436028	0.405939	2	55722/81929	CEP72/SEH1L
GO:0043171	peptide catabolic process	2/394	17/17913	0.0527963	0.436028	0.405939	2	1889/2687	ECE1/GGT5
GO:0060438	trachea development	2/394	17/17913	0.0527963	0.436028	0.405939	2	6469/7048	SHH/TGFBR2
GO:1902683	regulation of receptor localization to synapse	2/394	17/17913	0.0527963	0.436028	0.405939	2	1605/1627	DAG1/DBN1
GO:2001267	regulation of cysteine-type endopeptidase activity involved in apoptotic signaling pathway	2/394	17/17913	0.0527963	0.436028	0.405939	2	4088/9705	SMAD3/ST18
GO:0006195	purine nucleotide catabolic process	3/394	39/17913	0.0539017	0.440371	0.409982	3	10846/5142/5144	PDE10A/PDE4B/PDE4D
GO:0014741	negative regulation of muscle hypertrophy	3/394	39/17913	0.0539017	0.440371	0.409982	3	5058/4088/3488	PAK1/SMAD3/IGFBP5
GO:0021532	neural tube patterning	3/394	39/17913	0.0539017	0.440371	0.409982	3	6469/2736/9742	SHH/GLI2/IFT140
GO:0033003	regulation of mast cell activation	3/394	39/17913	0.0539017	0.440371	0.409982	3	9846/11314/85480	GAB2/CD300A/TSLP
GO:2000826	regulation of heart morphogenesis	3/394	39/17913	0.0539017	0.440371	0.409982	3	6092/7048/7046	ROBO2/TGFBR2/TGFBR1
GO:0008361	regulation of cell size	7/394	154/17913	0.0540996	0.440626	0.410219	7	1954/5058/27185/7143/4916/1808/4131	MEGF8/PAK1/DISC1/TNR/NTRK3/DPYSL2/MAP1B
GO:0050808	synapse organization	14/394	394/17913	0.0541648	0.440626	0.410219	14	54434/27185/7143/4916/26059/1605/1740/6092/23613/575/22941/1627/4131/23769	SSH1/DISC1/TNR/NTRK3/ERC2/DAG1/DLG2/ROBO2/ZMYND8/ADGRB1/SHANK2/DBN1/MAP1B/FLRT1
GO:0003143	embryonic heart tube morphogenesis	4/394	65/17913	0.0547577	0.442606	0.412063	4	1954/6469/4088/7048	MEGF8/SHH/SMAD3/TGFBR2
GO:0032945	negative regulation of mononuclear cell proliferation	4/394	65/17913	0.0547577	0.442606	0.412063	4	11314/6693/6469/5573	CD300A/SPN/SHH/PRKAR1A
GO:0050672	negative regulation of lymphocyte proliferation	4/394	65/17913	0.0547577	0.442606	0.412063	4	11314/6693/6469/5573	CD300A/SPN/SHH/PRKAR1A
GO:0048738	cardiac muscle tissue development	9/394	221/17913	0.056159	0.452004	0.420812	9	55553/5058/26011/5915/10818/196528/5573/7048/7046	SOX6/PAK1/TENM4/RARB/FRS2/ARID2/PRKAR1A/TGFBR2/TGFBR1
GO:0008360	regulation of cell shape	6/394	124/17913	0.0562401	0.452004	0.420812	6	9948/2035/1902/152273/114299/1605	WDR1/EPB41/LPAR1/FGD5/PALM2/DAG1
GO:0007030	Golgi organization	5/394	94/17913	0.0563964	0.452004	0.420812	5	9648/53407/23271/55666/3801	GCC2/STX18/CAMSAP2/NPLOC4/KIFC3
GO:0048640	negative regulation of developmental growth	5/394	94/17913	0.0563964	0.452004	0.420812	5	6788/5058/7143/8614/7048	STK3/PAK1/TNR/STC2/TGFBR2
GO:0007015	actin filament organization	12/394	325/17913	0.0565464	0.452252	0.421043	12	9948/28984/1902/5058/133522/9938/4690/56907/4088/1627/22843/7046	WDR1/RGCC/LPAR1/PAK1/PPARGC1B/ARHGAP25/NCK1/SPIRE1/SMAD3/DBN1/PPM1E/TGFBR1
GO:0045806	negative regulation of endocytosis	4/394	66/17913	0.0573236	0.453958	0.422632	4	4043/11314/112755/2042	LRPAP1/CD300A/STX1B/EPHA3
GO:0046785	microtubule polymerization	4/394	66/17913	0.0573236	0.453958	0.422632	4	5058/23271/1859/4131	PAK1/CAMSAP2/DYRK1A/MAP1B
GO:1900076	regulation of cellular response to insulin stimulus	4/394	66/17913	0.0573236	0.453958	0.422632	4	5167/55198/5058/4690	ENPP1/APPL2/PAK1/NCK1
GO:0031279	regulation of cyclase activity	3/394	40/17913	0.0573572	0.453958	0.422632	3	2978/775/9568	GUCA1A/CACNA1C/GABBR2
GO:0046621	negative regulation of organ growth	3/394	40/17913	0.0573572	0.453958	0.422632	3	6788/5058/7048	STK3/PAK1/TGFBR2
GO:0060079	excitatory postsynaptic potential	5/394	95/17913	0.0585073	0.454664	0.423289	5	5024/54434/112755/1137/23613	P2RX3/SSH1/STX1B/CHRNA4/ZMYND8
GO:0006312	mitotic recombination	2/394	18/17913	0.0585532	0.454664	0.423289	2	286053/2067	NSMCE2/ERCC1
GO:0007274	neuromuscular synaptic transmission	2/394	18/17913	0.0585532	0.454664	0.423289	2	5024/246329	P2RX3/STAC3
GO:0033005	positive regulation of mast cell activation	2/394	18/17913	0.0585532	0.454664	0.423289	2	9846/85480	GAB2/TSLP
GO:0043555	regulation of translation in response to stress	2/394	18/17913	0.0585532	0.454664	0.423289	2	27102/4690	EIF2AK1/NCK1
GO:0048557	embryonic digestive tract morphogenesis	2/394	18/17913	0.0585532	0.454664	0.423289	2	6469/348093	SHH/RBPMS2
GO:0055083	monovalent inorganic anion homeostasis	2/394	18/17913	0.0585532	0.454664	0.423289	2	6569/5167	SLC34A1/ENPP1
GO:0060977	coronary vasculature morphogenesis	2/394	18/17913	0.0585532	0.454664	0.423289	2	196528/7046	ARID2/TGFBR1
GO:0071318	cellular response to ATP	2/394	18/17913	0.0585532	0.454664	0.423289	2	5024/54434	P2RX3/SSH1
GO:0051493	regulation of cytoskeleton organization	16/394	472/17913	0.0586431	0.454664	0.423289	16	54461/9948/28984/1902/5058/4916/4690/56907/4088/2042/23271/55968/22843/7046/1859/4131	FBXW5/WDR1/RGCC/LPAR1/PAK1/NTRK3/NCK1/SPIRE1/SMAD3/EPHA3/CAMSAP2/NSFL1C/PPM1E/TGFBR1/DYRK1A/MAP1B
GO:0032386	regulation of intracellular transport	14/394	400/17913	0.0598515	0.462259	0.430359	14	9846/11314/9648/6721/6469/112755/8086/5058/53407/4088/1137/79628/4131/10755	GAB2/CD300A/GCC2/SREBF2/SHH/STX1B/AAAS/PAK1/STX18/SMAD3/CHRNA4/SH3TC2/MAP1B/GIPC1
GO:0030010	establishment of cell polarity	6/394	126/17913	0.0598661	0.462259	0.430359	6	81704/6469/5058/55968/23150/4131	DOCK8/SHH/PAK1/NSFL1C/FRMD4B/MAP1B
GO:0070588	calcium ion transmembrane transport	11/394	293/17913	0.0600954	0.463088	0.431132	11	2905/378807/162514/7225/8911/775/779/5142/8398/5144/246329	GRIN2C/CATSPER4/TRPV3/TRPC6/CACNA1I/CACNA1C/CACNA1S/PDE4B/PLA2G6/PDE4D/STAC3
GO:0098815	modulation of excitatory postsynaptic potential	3/394	41/17913	0.0609149	0.466564	0.434368	3	54434/112755/23613	SSH1/STX1B/ZMYND8
GO:1903053	regulation of extracellular matrix organization	3/394	41/17913	0.0609149	0.466564	0.434368	3	28984/1605/4088	RGCC/DAG1/SMAD3
GO:2000404	regulation of T cell migration	3/394	41/17913	0.0609149	0.466564	0.434368	3	81704/6693/27347	DOCK8/SPN/STK39
GO:0051271	negative regulation of cellular component movement	13/394	365/17913	0.0610507	0.466663	0.43446	13	11314/9289/28984/83481/6469/5797/1605/3488/5592/23613/575/196528/10076	CD300A/ADGRG1/RGCC/EPPK1/SHH/PTPRM/DAG1/IGFBP5/PRKG1/ZMYND8/ADGRB1/ARID2/PTPRU
GO:0017156	calcium ion regulated exocytosis	6/394	127/17913	0.0617301	0.470909	0.438413	6	9066/112755/26059/1137/6809/10755	SYT7/STX1B/ERC2/CHRNA4/STX3/GIPC1
GO:0007266	Rho protein signal transduction	7/394	159/17913	0.0620843	0.471654	0.439106	7	9289/84904/1902/152273/23263/153478/50650	ADGRG1/ARHGEF39/LPAR1/FGD5/MCF2L/PLEKHG4B/ARHGEF3
GO:0001763	morphogenesis of a branching structure	8/394	192/17913	0.0623587	0.471654	0.439106	8	6469/2736/5058/1605/10818/80000/7048/56998	SHH/GLI2/PAK1/DAG1/FRS2/GREB1L/TGFBR2/CTNNBIP1
GO:0030258	lipid modification	8/394	192/17913	0.0623587	0.471654	0.439106	8	9110/10449/129303/6483/55198/3612/55289/51	MTMR4/ACAA2/TMEM150A/ST3GAL2/APPL2/IMPA1/ACOXL/ACOX1
GO:0043010	camera-type eye development	11/394	295/17913	0.0624485	0.471654	0.439106	11	6469/4916/9742/5797/775/4088/10818/6497/7048/7399/7046	SHH/NTRK3/IFT140/PTPRM/CACNA1C/SMAD3/FRS2/SKI/TGFBR2/USH2A/TGFBR1
GO:1903037	regulation of leukocyte cell-cell adhesion	11/394	295/17913	0.0624485	0.471654	0.439106	11	11314/81704/6693/30835/6469/2736/5058/4690/5573/7048/1840	CD300A/DOCK8/SPN/CD209/SHH/GLI2/PAK1/NCK1/PRKAR1A/TGFBR2/DTX1
GO:0045995	regulation of embryonic development	6/394	128/17913	0.0636282	0.477265	0.44433	6	6469/6788/26011/1605/1289/9904	SHH/STK3/TENM4/DAG1/COL5A1/RBM19
GO:0043434	response to peptide hormone	14/394	404/17913	0.0638598	0.477265	0.44433	14	6569/3164/5167/55198/5058/4690/1605/55777/3488/8614/9114/5573/4131/2695	SLC34A1/NR4A1/ENPP1/APPL2/PAK1/NCK1/DAG1/MBD5/IGFBP5/STC2/ATP6V0D1/PRKAR1A/MAP1B/GIP
GO:0060541	respiratory system development	8/394	193/17913	0.0638746	0.477265	0.44433	8	8022/6469/2736/1605/10409/3488/6497/7048	LHX3/SHH/GLI2/DAG1/BASP1/IGFBP5/SKI/TGFBR2
GO:0007350	blastoderm segmentation	2/394	19/17913	0.0645153	0.477265	0.44433	2	10409/10818	BASP1/FRS2
GO:0023019	signal transduction involved in regulation of gene expression	2/394	19/17913	0.0645153	0.477265	0.44433	2	4088/6911	SMAD3/TBX6
GO:0031281	positive regulation of cyclase activity	2/394	19/17913	0.0645153	0.477265	0.44433	2	2978/775	GUCA1A/CACNA1C
GO:0032332	positive regulation of chondrocyte differentiation	2/394	19/17913	0.0645153	0.477265	0.44433	2	55553/4088	SOX6/SMAD3
GO:0033189	response to vitamin A	2/394	19/17913	0.0645153	0.477265	0.44433	2	6569/4131	SLC34A1/MAP1B
GO:0072074	kidney mesenchyme development	2/394	19/17913	0.0645153	0.477265	0.44433	2	6469/10409	SHH/BASP1
GO:0060999	positive regulation of dendritic spine development	3/394	42/17913	0.0645733	0.477265	0.44433	3	1902/23613/1627	LPAR1/ZMYND8/DBN1
GO:0086004	regulation of cardiac muscle cell contraction	3/394	42/17913	0.0645733	0.477265	0.44433	3	775/5142/5144	CACNA1C/PDE4B/PDE4D
GO:0032956	regulation of actin cytoskeleton organization	11/394	297/17913	0.0648612	0.477714	0.444749	11	9948/28984/1902/5058/4916/4690/56907/4088/2042/22843/7046	WDR1/RGCC/LPAR1/PAK1/NTRK3/NCK1/SPIRE1/SMAD3/EPHA3/PPM1E/TGFBR1
GO:0071900	regulation of protein serine/threonine kinase activity	16/394	479/17913	0.0650593	0.477714	0.444749	16	11314/28984/4293/54757/7405/6788/27347/1902/5058/4916/9802/2911/10818/4217/5573/7046	CD300A/RGCC/MAP3K9/FAM20A/UVRAG/STK3/STK39/LPAR1/PAK1/NTRK3/DAZAP2/GRM1/FRS2/MAP3K5/PRKAR1A/TGFBR1
GO:0006446	regulation of translational initiation	4/394	69/17913	0.0654005	0.477714	0.444749	4	27102/8662/4690/9811	EIF2AK1/EIF3B/NCK1/CTIF
GO:0031110	regulation of microtubule polymerization or depolymerization	4/394	69/17913	0.0654005	0.477714	0.444749	4	5058/23271/1859/4131	PAK1/CAMSAP2/DYRK1A/MAP1B
GO:0006813	potassium ion transport	8/394	194/17913	0.0654134	0.477714	0.444749	8	3768/50801/27347/3763/56479/1804/3746/11060	KCNJ12/KCNK4/STK39/KCNJ6/KCNQ5/DPP6/KCNC1/WWP2
GO:0003206	cardiac chamber morphogenesis	6/394	129/17913	0.0655603	0.477714	0.444749	6	5915/9249/6092/7048/7468/7046	RARB/DHRS3/ROBO2/TGFBR2/NSD2/TGFBR1
GO:0006165	nucleoside diphosphate phosphorylation	6/394	129/17913	0.0655603	0.477714	0.444749	6	5213/8086/81929/3098/9611/405	PFKM/AAAS/SEH1L/HK1/NCOR1/ARNT
GO:0110053	regulation of actin filament organization	9/394	228/17913	0.0656401	0.477714	0.444749	9	9948/28984/1902/5058/4690/56907/4088/22843/7046	WDR1/RGCC/LPAR1/PAK1/NCK1/SPIRE1/SMAD3/PPM1E/TGFBR1
GO:0051146	striated muscle cell differentiation	10/394	263/17913	0.066262	0.481318	0.448104	10	55553/6469/5058/5915/3488/10818/575/6497/5573/246329	SOX6/SHH/PAK1/RARB/IGFBP5/FRS2/ADGRB1/SKI/PRKAR1A/STAC3
GO:0099504	synaptic vesicle cycle	7/394	162/17913	0.0672029	0.487221	0.453599	7	9066/112755/26059/5337/1137/6809/10755	SYT7/STX1B/ERC2/PLD1/CHRNA4/STX3/GIPC1
GO:0050921	positive regulation of chemotaxis	6/394	130/17913	0.0675266	0.487947	0.454275	6	1954/27347/1902/4916/4088/6809	MEGF8/STK39/LPAR1/NTRK3/SMAD3/STX3
GO:0033045	regulation of sister chromatid segregation	4/394	70/17913	0.0682179	0.487947	0.454275	4	10783/84861/84250/286053	NEK6/KLHL22/SLF1/NSMCE2
GO:0010470	regulation of gastrulation	3/394	43/17913	0.0683306	0.487947	0.454275	3	26011/1605/1289	TENM4/DAG1/COL5A1
GO:0034198	cellular response to amino acid starvation	3/394	43/17913	0.0683306	0.487947	0.454275	3	84557/81929/4217	MAP1LC3A/SEH1L/MAP3K5
GO:0051154	negative regulation of striated muscle cell differentiation	3/394	43/17913	0.0683306	0.487947	0.454275	3	55553/5058/10818	SOX6/PAK1/FRS2
GO:0051339	regulation of lyase activity	3/394	43/17913	0.0683306	0.487947	0.454275	3	2978/775/9568	GUCA1A/CACNA1C/GABBR2
[truncated: 3,269 more rows]

## Sheet: gene_filter peaks_UV_MF.
ID	Description	GeneRatio	BgRatio	pvalue	p.adjust	qvalue	Count	ENTREZID	SYMBOL
[truncated: 553 more rows]
