# Supplementary material for: lncRNA-ZFAS1, an emerging gate-keeper in DNA damage-dependent transcriptional regulation
Source: Research Square preprint supplement (doi:10.21203/rs.3.rs-3233912/v1), 2023-09-13
Supplement: Supplementary file 6 [file 9cf643f3aa669748c02caca1.xlsx]

## Sheet: mRNA_UV_cluster 2_GOenrich
Category	ID	Description	GeneRatio	BgRatio	pvalue	padj	geneID	Count
BP	GO:0000303	response to superoxide	7/575	28/16266	4.1202e-05	0.0871056	SOD3/SOD2/CD36/FBLN5/FANCC/PRDX2/ERCC6	7
BP	GO:0000305	response to oxygen radical	7/575	29/16266	5.26681e-05	0.0871056	SOD3/SOD2/CD36/FBLN5/FANCC/PRDX2/ERCC6	7
BP	GO:0019430	removal of superoxide radicals	6/575	22/16266	8.74055e-05	0.0871056	SOD3/SOD2/CD36/FBLN5/FANCC/PRDX2	6
BP	GO:0006801	superoxide metabolic process	9/575	53/16266	8.93849e-05	0.0871056	NOX3/NOX4/SOD3/SOD2/NCF2/CD36/FBLN5/FANCC/PRDX2	9
BP	GO:0072160	nephron tubule epithelial cell differentiation	5/575	15/16266	0.000121316	0.0923513	WWTR1/MEF2C/GATA3/CTNNB1/MTSS1	5
BP	GO:0071450	cellular response to oxygen radical	6/575	25/16266	0.000189536	0.0923513	SOD3/SOD2/CD36/FBLN5/FANCC/PRDX2	6
BP	GO:0071451	cellular response to superoxide	6/575	25/16266	0.000189536	0.0923513	SOD3/SOD2/CD36/FBLN5/FANCC/PRDX2	6
BP	GO:1990748	cellular detoxification	6/575	25/16266	0.000189536	0.0923513	SOD3/SOD2/CD36/FBLN5/FANCC/PRDX2	6
BP	GO:0098754	detoxification	6/575	28/16266	0.00036842	0.159567	SOD3/SOD2/CD36/FBLN5/FANCC/PRDX2	6
BP	GO:0060914	heart formation	5/575	20/16266	0.000540862	0.210828	MEF2C/EYA1/LEMD2/CTNNB1/AXIN2	5
BP	GO:0007162	negative regulation of cell adhesion	18/575	214/16266	0.000611421	0.216666	CYLD/FXYD5/CORO1C/GCNT2/BTN2A2/MAP2K5/BCAS3/TBCD/ZC3H8/CLASP2/NFKBID/PRDX2/RND1/C1QTNF1/PAWR/MUC1/SEMA4D/APOD	18
BP	GO:0071478	cellular response to radiation	14/575	146/16266	0.000675201	0.219328	GNB5/NOX4/POLI/EEF1D/GATA3/FNTB/INTS7/CHEK1/RPGR/DDIAS/FNTA/RHNO1/CNGA1/CERS1	14
BP	GO:0071214	cellular response to abiotic stimulus	20/575	261/16266	0.00101333	0.303842	TNFRSF1A/GNB5/NOX4/CAPN3/TSPO/POLI/EEF1D/GATA3/FNTB/INTS7/CHEK1/GRM1/RPGR/DDIAS/FNTA/CRADD/RHNO1/TLR5/CNGA1/CERS1	20
BP	GO:0048645	organ formation	8/575	60/16266	0.00117625	0.327502	FGFR2/MEF2C/EYA1/TLX1/LEMD2/CTNNB1/AXIN2/FGF3	8
BP	GO:0035850	epithelial cell differentiation involved in kidney development	6/575	35/16266	0.00128701	0.334452	WWTR1/MEF2C/GATA3/CTNNB1/MTSS1/MAGI2	6
BP	GO:0032516	positive regulation of phosphoprotein phosphatase activity	4/575	15/16266	0.00154525	0.354317	PPP1R12A/PPP2R4/PAWR/MAGI2	4
BP	GO:0051895	negative regulation of focal adhesion assembly	4/575	15/16266	0.00154525	0.354317	CORO1C/BCAS3/CLASP2/APOD	4
BP	GO:0072593	reactive oxygen species metabolic process	18/575	235/16266	0.00178331	0.386185	NOX3/NOX4/TSPO/SOD3/SOD2/AGXT2/NCF2/POR/CD36/GLS2/FBLN5/MMP3/PTS/FANCC/PRDX2/PARL/TLR5/DDAH2	18
BP	GO:0010922	positive regulation of phosphatase activity	5/575	26/16266	0.001926	0.390427	PPP1R12A/MEF2C/PPP2R4/PAWR/MAGI2	5
BP	GO:1903392	negative regulation of adherens junction organization	4/575	16/16266	0.00200322	0.390427	CORO1C/BCAS3/CLASP2/APOD	4
BP	GO:0022617	extracellular matrix disassembly	12/575	130/16266	0.0022093	0.410089	DCN/CD44/ELN/COL11A1/CLASP1/KIF9/COL4A2/MMP3/ADAM8/NCSTN/CLASP2/COL25A1	12
BP	GO:0046467	membrane lipid biosynthetic process	11/575	115/16266	0.00251524	0.424053	SPHK2/ST3GAL6/ST3GAL5/GBGT1/PGAP2/FAM57B/ACER1/SPHK1/ST8SIA3/PIGN/CERS1	11
BP	GO:0051972	regulation of telomerase activity	4/575	17/16266	0.00254706	0.424053	ACD/PPARG/CTNNB1/CERS1	4
BP	GO:0071482	cellular response to light stimulus	10/575	99/16266	0.0026109	0.424053	GNB5/POLI/FNTB/CHEK1/RPGR/DDIAS/FNTA/RHNO1/CNGA1/CERS1	10
BP	GO:0032496	response to lipopolysaccharide	20/575	285/16266	0.00287346	0.42833	MGST1/FMO1/DCN/MEF2C/TSPO/RPS6KB1/CYP27B1/ERBB2IP/PDE4D/NCF2/TNFAIP3/TRIM6/CD36/IL18BP/PRDX2/RPS6KA3/PAWR/TLR5/LITAF/LTC4S	20
BP	GO:2000278	regulation of DNA biosynthetic process	6/575	41/16266	0.00298117	0.42833	KCNK2/NOX4/ACD/PPARG/CTNNB1/CERS1	6
BP	GO:0048660	regulation of smooth muscle cell proliferation	9/575	85/16266	0.00305931	0.42833	FGFR2/OGN/RPS6KB1/PDE4D/TNFAIP3/PPARG/TCF7L2/CTNNB1/APOD	9
BP	GO:0071599	otic vesicle development	4/575	18/16266	0.00318424	0.42833	FGFR2/EYA1/GATA3/FGF3	4
BP	GO:0010092	specification of organ identity	5/575	29/16266	0.00318665	0.42833	FGFR2/MEF2C/CTNNB1/AXIN2/FGF3	5
BP	GO:0043122	regulation of I-kappaB kinase/NF-kappaB signaling	17/575	231/16266	0.00356859	0.463679	TRAF3IP2/TNFRSF1A/CYLD/CAPN3/EEF1D/WLS/TNFAIP3/ANKRD17/CD36/RHOC/EDA/NFKBID/CTNNB1/SPHK1/LITAF/CLEC6A/IKBKG	17
BP	GO:0048659	smooth muscle cell proliferation	9/575	88/16266	0.00386855	0.473948	FGFR2/OGN/RPS6KB1/PDE4D/TNFAIP3/PPARG/TCF7L2/CTNNB1/APOD	9
BP	GO:0035307	positive regulation of protein dephosphorylation	6/575	44/16266	0.00428107	0.473948	PPP1R12A/MEF2C/PPP1R7/PPP2R4/PAWR/MAGI2	6
BP	GO:0009416	response to light stimulus	22/575	338/16266	0.00452443	0.473948	PLEKHB1/GNB5/CIRBP/POLI/NMU/MAPK10/SLC1A2/MSH6/FNTB/NTS/STRA6/CHEK1/RPGR/LRP8/PLB1/DDIAS/BEST1/FNTA/RHNO1/CNGA1/CERS1/ERCC6	22
BP	GO:0002237	response to molecule of bacterial origin	20/575	297/16266	0.00456656	0.473948	MGST1/FMO1/DCN/MEF2C/TSPO/RPS6KB1/CYP27B1/ERBB2IP/PDE4D/NCF2/TNFAIP3/TRIM6/CD36/IL18BP/PRDX2/RPS6KA3/PAWR/TLR5/LITAF/LTC4S	20
BP	GO:1901889	negative regulation of cell junction assembly	4/575	20/16266	0.00476727	0.473948	CORO1C/BCAS3/CLASP2/APOD	4
BP	GO:0006904	vesicle docking involved in exocytosis	6/575	45/16266	0.00479528	0.473948	STXBP2/SCFD1/VTI1B/VPS45/SYTL2/VPS33B	6
BP	GO:0035306	positive regulation of dephosphorylation	6/575	45/16266	0.00479528	0.473948	PPP1R12A/MEF2C/PPP1R7/PPP2R4/PAWR/MAGI2	6
BP	GO:0061005	cell differentiation involved in kidney development	6/575	45/16266	0.00479528	0.473948	WWTR1/MEF2C/GATA3/CTNNB1/MTSS1/MAGI2	6
BP	GO:2001234	negative regulation of apoptotic signaling pathway	15/575	199/16266	0.00481748	0.473948	CD44/EYA1/RPS6KB1/SOD2/IVNS1ABP/TNFAIP3/BCL2L2/PSME3/MAP2K5/TCF7L2/PGAP2/PRDX2/CTNNB1/PARL/MUC1	15
BP	GO:0010718	positive regulation of epithelial to mesenchymal transition	5/575	32/16266	0.00495361	0.473948	WWTR1/GCNT2/TCF7L2/CTNNB1/AXIN2	5
BP	GO:0009314	response to radiation	28/575	470/16266	0.00509905	0.473948	PLEKHB1/GNB5/NOX4/CIRBP/POLI/EYA1/EEF1D/GATA3/NMU/MAPK10/SLC1A2/MSH6/FNTB/NTS/STRA6/INTS7/CHEK1/RPGR/LRP8/PLB1/DDIAS/XRRA1/BEST1/FNTA/RHNO1/CNGA1/CERS1/ERCC6	28
BP	GO:0014047	glutamate secretion	6/575	46/16266	0.00535348	0.473948	RIMS1/SLC1A2/GIPC1/GLS2/PAK1/GRM2	6
BP	GO:0040019	positive regulation of embryonic development	5/575	33/16266	0.0056717	0.473948	CLASP1/GATA3/CLASP2/CTNNB1/GNB2L1	5
BP	GO:0014911	positive regulation of smooth muscle cell migration	4/575	21/16266	0.00572676	0.473948	NOX4/RPS6KB1/PDE4D/P2RY6	4
BP	GO:0015780	nucleotide-sugar transport	3/575	11/16266	0.00586357	0.473948	SLC35A3/SLC35A5/SLC35A1	3
BP	GO:0046520	sphingoid biosynthetic process	3/575	11/16266	0.00586357	0.473948	SPHK2/ACER1/SPHK1	3
BP	GO:0060484	lung-associated mesenchyme development	3/575	11/16266	0.00586357	0.473948	FGFR2/DPPA4/CTNNB1	3
BP	GO:0071786	endoplasmic reticulum tubular network organization	3/575	11/16266	0.00586357	0.473948	REEP1/RTN3/KIAA1715	3
BP	GO:0046785	microtubule polymerization	6/575	47/16266	0.00595778	0.473948	CLASP1/STMN2/TUBGCP4/TBCD/TPPP3/CLASP2	6
BP	GO:0043491	protein kinase B signaling	12/575	148/16266	0.00632709	0.49326	NOX4/TYRO3/TSC2/GATA3/RPS6KB1/GCNT2/TCF7L2/ADAM8/LEMD2/C1QTNF1/MAGI2/GNB2L1	12
BP	GO:2000738	positive regulation of stem cell differentiation	6/575	48/16266	0.0066103	0.505234	WWTR1/SOX6/GCNT2/TCF7L2/CTNNB1/AXIN2	6
BP	GO:0030148	sphingolipid biosynthetic process	8/575	80/16266	0.00721651	0.537589	SPHK2/ST3GAL6/ST3GAL5/FAM57B/ACER1/SPHK1/ST8SIA3/CERS1	8
BP	GO:0010812	negative regulation of cell-substrate adhesion	6/575	49/16266	0.00731314	0.537589	CORO1C/GCNT2/BCAS3/TBCD/CLASP2/APOD	6
BP	GO:0034614	cellular response to reactive oxygen species	10/575	115/16266	0.00758385	0.537589	SOD3/SOD2/TNFAIP3/CD36/IL18BP/FBLN5/MMP3/FANCC/PRDX2/GNB2L1	10
BP	GO:0006670	sphingosine metabolic process	3/575	12/16266	0.00761483	0.537589	SPHK2/ACER1/SPHK1	3
BP	GO:0010717	regulation of epithelial to mesenchymal transition	7/575	65/16266	0.0078611	0.537589	WWTR1/CLASP1/GCNT2/TCF7L2/CLASP2/CTNNB1/AXIN2	7
BP	GO:0034146	toll-like receptor 5 signaling pathway	7/575	65/16266	0.0078611	0.537589	MEF2A/MEF2C/MAPK10/TNFAIP3/RPS6KA3/TLR5/IKBKG	7
BP	GO:0010470	regulation of gastrulation	5/575	36/16266	0.00826158	0.555235	CLASP1/MAP2K5/CLASP2/TGIF1/GNB2L1	5
BP	GO:0033002	muscle cell proliferation	11/575	137/16266	0.00938034	0.578992	FGFR2/MEF2C/KCNK2/OGN/RPS6KB1/PDE4D/TNFAIP3/PPARG/TCF7L2/CTNNB1/APOD	11
BP	GO:0034311	diol metabolic process	3/575	13/16266	0.00964238	0.578992	SPHK2/ACER1/SPHK1	3
BP	GO:0071600	otic vesicle morphogenesis	3/575	13/16266	0.00964238	0.578992	FGFR2/EYA1/FGF3	3
BP	GO:0072182	regulation of nephron tubule epithelial cell differentiation	3/575	13/16266	0.00964238	0.578992	WWTR1/GATA3/CTNNB1	3
BP	GO:0007249	I-kappaB kinase/NF-kappaB signaling	17/575	258/16266	0.0104552	0.578992	TRAF3IP2/TNFRSF1A/CYLD/CAPN3/EEF1D/WLS/TNFAIP3/ANKRD17/CD36/RHOC/EDA/NFKBID/CTNNB1/SPHK1/LITAF/CLEC6A/IKBKG	17
BP	GO:0071479	cellular response to ionizing radiation	6/575	53/16266	0.0106691	0.578992	NOX4/EEF1D/GATA3/INTS7/DDIAS/RHNO1	6
BP	GO:0043123	positive regulation of I-kappaB kinase/NF-kappaB signaling	13/575	178/16266	0.0107313	0.578992	TRAF3IP2/TNFRSF1A/EEF1D/WLS/ANKRD17/CD36/RHOC/EDA/CTNNB1/SPHK1/LITAF/CLEC6A/IKBKG	13
BP	GO:0031113	regulation of microtubule polymerization	4/575	25/16266	0.0108287	0.578992	CLASP1/STMN2/TBCD/CLASP2	4
BP	GO:0071295	cellular response to vitamin	4/575	25/16266	0.0108287	0.578992	CYP27B1/PPARG/PAWR/LTC4S	4
BP	GO:0030335	positive regulation of cell migration	21/575	344/16266	0.0109563	0.578992	HDAC9/CLASP1/NOX4/GATA3/RPS6KB1/GCNT2/PDE4D/CGA/BCAS3/GRB7/PAK1/ADAM8/CLASP2/P2RY6/SPHK1/PAWR/CCBE1/TNFRSF18/SEMA4D/FGF16/GNB2L1	21
BP	GO:0051896	regulation of protein kinase B signaling	10/575	122/16266	0.0112833	0.578992	NOX4/TSC2/GATA3/GCNT2/TCF7L2/ADAM8/LEMD2/C1QTNF1/MAGI2/GNB2L1	10
BP	GO:0002753	cytoplasmic pattern recognition receptor signaling pathway	6/575	54/16266	0.0116543	0.578992	CYLD/ERBB2IP/TNFAIP3/ANKRD17/PUM1/IKBKG	6
BP	GO:0009636	response to toxic substance	13/575	180/16266	0.0117088	0.578992	MEF2C/SCFD1/RPS6KB1/SOD3/SOD2/CD36/FBLN5/ZC3H8/FANCC/PRDX2/HID1/CERS1/ERCC6	13
BP	GO:0021819	layer formation in cerebral cortex	3/575	14/16266	0.0119542	0.578992	LRP8/CTNNB1/ADGRG1	3
BP	GO:0070243	regulation of thymocyte apoptotic process	3/575	14/16266	0.0119542	0.578992	ZC3H8/ADAM8/NFKBID	3
BP	GO:0086003	cardiac muscle cell contraction	3/575	14/16266	0.0119542	0.578992	PDE4D/SUMO1/ANK2	3
BP	GO:0051053	negative regulation of DNA metabolic process	8/575	88/16266	0.0125437	0.578992	KCNK2/STAG2/ACD/MSH6/PPARG/RPS3/RAD17/CERS1	8
BP	GO:0006865	amino acid transport	11/575	143/16266	0.0126853	0.578992	RIMS1/FOLR3/SLC1A2/SLC16A10/GIPC1/GLS2/SLC7A1/PAK1/GRM2/SLC25A22/SLC36A2	11
BP	GO:0031032	actomyosin structure organization	11/575	143/16266	0.0126853	0.578992	MEF2A/CLASP1/NOX4/ASAP3/CAPN3/MYH14/MYL2/LDB3/FHOD3/PAK1/CLASP2	11
BP	GO:0007029	endoplasmic reticulum organization	5/575	40/16266	0.0128524	0.578992	REEP1/UBL4A/ATL2/RTN3/KIAA1715	5
BP	GO:0007507	heart development	26/575	461/16266	0.0132106	0.578992	HDAC9/COL11A1/FGFR2/MEF2A/MEF2C/KCNK2/NOX4/TSC2/EYA1/GATA3/SOX6/MYL2/MTERF4/PPARG/FHOD3/MAP2K5/STRA6/FOXN4/TCF25/ANK2/LEMD2/T/CTNNB1/XIRP1/AXIN2/FGF3	26
BP	GO:0002221	pattern recognition receptor signaling pathway	13/575	183/16266	0.0133028	0.578992	MEF2A/MEF2C/CYLD/TYRO3/MAPK10/ERBB2IP/TNFAIP3/ANKRD17/PUM1/CD36/RPS6KA3/TLR5/IKBKG	13
BP	GO:0006835	dicarboxylic acid transport	8/575	89/16266	0.0133705	0.578992	RIMS1/FOLR3/SLC1A2/GIPC1/GLS2/PAK1/GRM2/SLC25A22	8
BP	GO:0031023	microtubule organizing center organization	9/575	107/16266	0.0135166	0.578992	PPP1R12A/CLASP1/HAUS4/CCDC18/TUBGCP4/BCAS3/CHEK1/CLASP2/CTNNB1	9
BP	GO:0042493	response to drug	24/575	418/16266	0.0138335	0.578992	MGST1/PDE4A/MEF2C/ABCB1/TSPO/GATA3/RPS6KB1/SLC1A2/NCF2/POR/PPARG/NTS/HADH/SS18/SLC47A1/NAT8/LRP8/CTNNB1/TGIF1/GABRG3/APOD/SLC22A5/LTC4S/CERS1	24
BP	GO:0006643	membrane lipid metabolic process	13/575	184/16266	0.0138696	0.578992	SPHK2/ST3GAL6/PPP2R1A/ST3GAL5/B4GALT4/GBGT1/PGAP2/FAM57B/ACER1/SPHK1/ST8SIA3/PIGN/CERS1	13
BP	GO:0045987	positive regulation of smooth muscle contraction	4/575	27/16266	0.0142128	0.578992	NMU/ADRA1D/SPHK1/PAWR	4
BP	GO:0085029	extracellular matrix assembly	4/575	27/16266	0.0142128	0.578992	CLASP1/PLOD3/FBLN5/CLASP2	4
BP	GO:0007062	sister chromatid cohesion	5/575	41/16266	0.0142234	0.578992	KIF22/STAG2/PPP2R1A/CTNNB1/AXIN2	5
BP	GO:0006790	sulfur compound metabolic process	21/575	353/16266	0.0143122	0.578992	MGST1/DCN/XYLT2/HAGH/ST3GAL6/FAR2/NOX4/PHGDH/SULT2A1/OGN/PCCB/ST3GAL5/B4GALT4/NAT8/TCF7L2/MTHFD2L/CTNNB1/NDNF/PC/SPOCK3/SULT1A1	21
BP	GO:0042692	muscle cell differentiation	21/575	353/16266	0.0143122	0.578992	HDAC9/FGFR2/MEF2A/SMARCA2/MEF2C/NOX4/CAPN3/DYRK1B/SOX6/MYL2/LDB3/SYNE1/ANKRD17/FHOD3/TMTC3/ANK2/TCF7L2/UCHL1/T/CTNNB1/SEMA4C	21
BP	GO:2000147	positive regulation of cell motility	21/575	353/16266	0.0143122	0.578992	HDAC9/CLASP1/NOX4/GATA3/RPS6KB1/GCNT2/PDE4D/CGA/BCAS3/GRB7/PAK1/ADAM8/CLASP2/P2RY6/SPHK1/PAWR/CCBE1/TNFRSF18/SEMA4D/FGF16/GNB2L1	21
BP	GO:0032682	negative regulation of chemokine production	3/575	15/16266	0.0145565	0.578992	ERBB2IP/MAP2K5/APOD	3
BP	GO:0046519	sphingoid metabolic process	3/575	15/16266	0.0145565	0.578992	SPHK2/ACER1/SPHK1	3
BP	GO:0060579	ventral spinal cord interneuron fate commitment	3/575	15/16266	0.0145565	0.578992	LHX3/DBX1/FOXN4	3
BP	GO:0060581	cell fate commitment involved in pattern specification	3/575	15/16266	0.0145565	0.578992	LHX3/DBX1/FOXN4	3
BP	GO:0071711	basement membrane organization	3/575	15/16266	0.0145565	0.578992	CLASP1/PLOD3/CLASP2	3
BP	GO:0071850	mitotic cell cycle arrest	3/575	15/16266	0.0145565	0.578992	MCPH1/DDIAS/MAGI2	3
BP	GO:1901679	nucleotide transmembrane transport	3/575	15/16266	0.0145565	0.578992	SLC35A3/SLC35A5/SLC35A1	3
BP	GO:2000696	regulation of epithelial cell differentiation involved in kidney development	3/575	15/16266	0.0145565	0.578992	WWTR1/GATA3/CTNNB1	3
BP	GO:0022406	membrane docking	7/575	74/16266	0.0155143	0.592738	STXBP2/SCFD1/VTI1B/VPS45/SYTL2/PEX5/VPS33B	7
BP	GO:0008156	negative regulation of DNA replication	5/575	42/16266	0.0156892	0.592738	STAG2/ACD/PPARG/RAD17/CERS1	5
BP	GO:0072009	nephron epithelium development	9/575	110/16266	0.0159667	0.592738	WWTR1/CD44/ACAT1/MEF2C/EYA1/GATA3/CTNNB1/MTSS1/MAGI2	9
BP	GO:0032350	regulation of hormone metabolic process	4/575	28/16266	0.0161291	0.592738	GATA3/NR3C1/POR/TCF7L2	4
BP	GO:2000108	positive regulation of leukocyte apoptotic process	4/575	28/16266	0.0161291	0.592738	MEF2C/ZC3H8/ADAM8/NFKBID	4
BP	GO:0046823	negative regulation of nucleocytoplasmic transport	7/575	75/16266	0.0166077	0.592738	WWTR1/CYLD/CD36/BARD1/AXIN2/APOD/LITAF	7
BP	GO:0051090	regulation of sequence-specific DNA binding transcription factor activity	21/575	359/16266	0.016969	0.592738	CYLD/CAPN3/SGK3/MAPK10/ERBB2IP/SUMO1/TNFAIP3/SGK1/SPOP/SMARCA4/PPARG/MAP2K5/TCF7L2/RPS3/ADAM8/LRP8/EDA/NFKBID/PRDX2/SPHK1/IKBKG	21
BP	GO:1903510	mucopolysaccharide metabolic process	10/575	130/16266	0.0170273	0.592738	DCN/XYLT2/CD44/ST3GAL6/OGN/ST3GAL5/B4GALT4/ITIH3/NDNF/SPOCK3	10
BP	GO:0033194	response to hydroperoxide	3/575	16/16266	0.0174534	0.592738	MGST1/CD36/DDIAS	3
BP	GO:0055003	cardiac myofibril assembly	3/575	16/16266	0.0174534	0.592738	MEF2A/MYL2/FHOD3	3
BP	GO:0070234	positive regulation of T cell apoptotic process	3/575	16/16266	0.0174534	0.592738	ZC3H8/ADAM8/NFKBID	3
BP	GO:0015992	proton transport	11/575	150/16266	0.0175826	0.592738	ATP12A/SLC4A11/ATP6V0A4/SLC2A9/SLC35A3/SLC35A5/SLC47A1/SLC35A1/COX6C/SLC36A2/SLC9A6	11
BP	GO:0002757	immune response-activating signal transduction	25/575	450/16266	0.0176386	0.592738	BTN3A1/CYFIP2/MEF2A/MEF2C/CYLD/TYRO3/GATA3/MAPK10/ERBB2IP/PDE4D/TNFAIP3/PSME3/ANKRD17/PUM1/CD36/CMTM3/PAK1/ADAM8/GCSAM/RPS6KA3/PAWR/PLA2G6/TLR5/CLEC6A/IKBKG	25
BP	GO:0034333	adherens junction assembly	7/575	76/16266	0.0177544	0.592738	CLASP1/CORO1C/BCAS3/TBCD/CLASP2/CTNNB1/APOD	7
BP	GO:2000736	regulation of stem cell differentiation	9/575	112/16266	0.0177717	0.592738	WWTR1/CLASP1/SOX6/GCNT2/TCF7L2/CLASP2/CTNNB1/AXIN2/N4BP2L2	9
BP	GO:0051272	positive regulation of cellular component movement	21/575	361/16266	0.0179358	0.592738	HDAC9/CLASP1/NOX4/GATA3/RPS6KB1/GCNT2/PDE4D/CGA/BCAS3/GRB7/PAK1/ADAM8/CLASP2/P2RY6/SPHK1/PAWR/CCBE1/TNFRSF18/SEMA4D/FGF16/GNB2L1	21
BP	GO:0001953	negative regulation of cell-matrix adhesion	4/575	29/16266	0.0181999	0.592738	CORO1C/BCAS3/CLASP2/APOD	4
BP	GO:0048662	negative regulation of smooth muscle cell proliferation	4/575	29/16266	0.0181999	0.592738	OGN/TNFAIP3/PPARG/APOD	4
BP	GO:0030198	extracellular matrix organization	22/575	385/16266	0.0188112	0.592738	DCN/CD44/ELN/COL11A1/CLASP1/ERO1B/KIF9/COMP/PLOD3/GFAP/COL4A2/FBLN5/HAPLN1/MMP3/ADAM8/DST/NCSTN/CLASP2/CRTAP/NDNF/PLEC/COL25A1	22
BP	GO:0048678	response to axon injury	6/575	60/16266	0.0189411	0.592738	KCNK2/TSPO/NTS/CHL1/APOD/LTC4S	6
BP	GO:0034134	toll-like receptor 2 signaling pathway	7/575	77/16266	0.0189558	0.592738	MEF2A/MEF2C/MAPK10/TNFAIP3/CD36/RPS6KA3/IKBKG	7
BP	GO:0043547	positive regulation of GTPase activity	27/575	499/16266	0.019088	0.592738	ASAP3/ARFGAP1/TSC2/DENND3/RAPGEFL1/CORO1C/LAMTOR2/RGS4/TBC1D15/ARHGAP40/DOCK6/ARHGEF9/RGS22/BCAS3/TBCD/DOCK11/RPGR/TBC1D24/ARHGEF3/GAPVD1/AXIN2/RGS6/SEMA4D/ARHGEF12/GNB2L1/RGL3/ARHGEF25	27
BP	GO:0072080	nephron tubule development	8/575	95/16266	0.0191871	0.592738	WWTR1/CD44/ACAT1/MEF2C/EYA1/GATA3/CTNNB1/MTSS1	8
BP	GO:0006818	hydrogen transport	11/575	152/16266	0.0192108	0.592738	ATP12A/SLC4A11/ATP6V0A4/SLC2A9/SLC35A3/SLC35A5/SLC47A1/SLC35A1/COX6C/SLC36A2/SLC9A6	11
BP	GO:0043062	extracellular structure organization	22/575	386/16266	0.019313	0.592738	DCN/CD44/ELN/COL11A1/CLASP1/ERO1B/KIF9/COMP/PLOD3/GFAP/COL4A2/FBLN5/HAPLN1/MMP3/ADAM8/DST/NCSTN/CLASP2/CRTAP/NDNF/PLEC/COL25A1	22
BP	GO:0006672	ceramide metabolic process	7/575	78/16266	0.020213	0.592738	ST3GAL6/PPP2R1A/ST3GAL5/FAM57B/ACER1/ST8SIA3/CERS1	7
BP	GO:0009247	glycolipid biosynthetic process	6/575	61/16266	0.0204012	0.592738	ST3GAL6/ST3GAL5/GBGT1/PGAP2/ST8SIA3/PIGN	6
BP	GO:0016266	O-glycan processing	6/575	61/16266	0.0204012	0.592738	ST3GAL6/ST3GAL5/GALNT8/MUC17/MUC13/MUC1	6
BP	GO:0018146	keratan sulfate biosynthetic process	4/575	30/16266	0.0204284	0.592738	ST3GAL6/OGN/ST3GAL5/B4GALT4	4
BP	GO:0072666	establishment of protein localization to vacuole	4/575	30/16266	0.0204284	0.592738	VTI1B/SNX16/TNFAIP3/VPS13A	4
BP	GO:1904036	negative regulation of epithelial cell apoptotic process	4/575	30/16266	0.0204284	0.592738	GATA3/TNFAIP3/TCF7L2/ANGPTL4	4
BP	GO:0000226	microtubule cytoskeleton organization	23/575	411/16266	0.0206047	0.592738	MARK4/MAP4/PPP1R12A/CLASP1/CYLD/HAUS4/EYA1/STMN2/PPP2R1A/PPP2R4/CCDC18/TUBGCP4/BCAS3/SS18/TBCD/CHEK1/DST/HYDIN/TPPP3/CLASP2/CTNNB1/CEP57L1/DYNC1H1	23
BP	GO:0010560	positive regulation of glycoprotein biosynthetic process	3/575	17/16266	0.0206476	0.592738	TCF7L2/CTNNB1/PAWR	3
BP	GO:0014850	response to muscle activity	3/575	17/16266	0.0206476	0.592738	CAPN3/METRNL/ADSL	3
BP	GO:0021514	ventral spinal cord interneuron differentiation	3/575	17/16266	0.0206476	0.592738	LHX3/DBX1/FOXN4	3
BP	GO:0034114	regulation of heterotypic cell-cell adhesion	3/575	17/16266	0.0206476	0.592738	CD44/GCNT2/MAP2K5	3
BP	GO:0032330	regulation of chondrocyte differentiation	5/575	45/16266	0.0206805	0.592738	SOX6/POR/KIAA1715/CTNNB1/AXIN2	5
BP	GO:0048538	thymus development	5/575	45/16266	0.0206805	0.592738	GATA3/PAX1/PRDX2/CTNNB1/FGF3	5
BP	GO:0002758	innate immune response-activating signal transduction	17/575	279/16266	0.0210388	0.597263	MEF2A/MEF2C/CYLD/TYRO3/MAPK10/ERBB2IP/TNFAIP3/PSME3/ANKRD17/PUM1/CD36/PAK1/ADAM8/RPS6KA3/TLR5/CLEC6A/IKBKG	17
BP	GO:0061326	renal tubule development	8/575	97/16266	0.0214748	0.597263	WWTR1/CD44/ACAT1/MEF2C/EYA1/GATA3/CTNNB1/MTSS1	8
BP	GO:0060537	muscle tissue development	20/575	346/16266	0.0218257	0.597263	DCN/HDAC9/COL11A1/FGFR2/MEF2A/MEF2C/KCNK2/NOX4/EYA1/MYH14/RPS6KB1/SOX6/MYL2/FOXP2/FHOD3/STRA6/TSC22D3/LEMD2/CTNNB1/FGF3	20
BP	GO:0048278	vesicle docking	6/575	62/16266	0.0219358	0.597263	STXBP2/SCFD1/VTI1B/VPS45/SYTL2/VPS33B	6
BP	GO:0000302	response to reactive oxygen species	13/575	196/16266	0.0222072	0.597263	SOD3/SOD2/TNFAIP3/CD36/APTX/IL18BP/FBLN5/MMP3/FANCC/PRDX2/APOD/GNB2L1/ERCC6	13
BP	GO:0046513	ceramide biosynthetic process	5/575	46/16266	0.0225496	0.597263	ST3GAL6/ST3GAL5/FAM57B/ST8SIA3/CERS1	5
BP	GO:0051145	smooth muscle cell differentiation	5/575	46/16266	0.0225496	0.597263	FGFR2/SMARCA2/MEF2C/ANKRD17/CTNNB1	5
BP	GO:0051893	regulation of focal adhesion assembly	5/575	46/16266	0.0225496	0.597263	CLASP1/CORO1C/BCAS3/CLASP2/APOD	5
BP	GO:0090109	regulation of cell-substrate junction assembly	5/575	46/16266	0.0225496	0.597263	CLASP1/CORO1C/BCAS3/CLASP2/APOD	5
BP	GO:0022400	regulation of rhodopsin mediated signaling pathway	4/575	31/16266	0.0228174	0.597263	GNB5/FNTB/FNTA/CNGA1	4
BP	GO:0031111	negative regulation of microtubule polymerization or depolymerization	4/575	31/16266	0.0228174	0.597263	CLASP1/STMN2/TBCD/CLASP2	4
BP	GO:0045581	negative regulation of T cell differentiation	4/575	31/16266	0.0228174	0.597263	CYLD/ZC3H8/NFKBID/PRDX2	4
BP	GO:0040017	positive regulation of locomotion	21/575	370/16266	0.0228302	0.597263	HDAC9/CLASP1/NOX4/GATA3/RPS6KB1/GCNT2/PDE4D/CGA/BCAS3/GRB7/PAK1/ADAM8/CLASP2/P2RY6/SPHK1/PAWR/CCBE1/TNFRSF18/SEMA4D/FGF16/GNB2L1	21
BP	GO:0007517	muscle organ development	20/575	348/16266	0.0230407	0.598752	DCN/HDAC9/COL11A1/FGFR2/MEF2A/MEF2C/KCNK2/CAPN3/MYH14/FKTN/RPS6KB1/SOX6/MYL2/SGCE/FOXP2/STRA6/TSC22D3/LEMD2/CTNNB1/FGF3	20
BP	GO:0001574	ganglioside biosynthetic process	3/575	18/16266	0.0241403	0.611032	ST3GAL6/ST3GAL5/ST8SIA3	3
BP	GO:0006198	cAMP catabolic process	3/575	18/16266	0.0241403	0.611032	PDE4A/PDE4D/GNB2L1	3
BP	GO:0006883	cellular sodium ion homeostasis	3/575	18/16266	0.0241403	0.611032	ATP12A/SGK3/SGK1	3
BP	GO:0010954	positive regulation of protein processing	3/575	18/16266	0.0241403	0.611032	ADAM8/CLEC3B/CCBE1	3
BP	GO:0002755	MyD88-dependent toll-like receptor signaling pathway	7/575	81/16266	0.0243308	0.61188	MEF2A/MEF2C/MAPK10/CD36/RPS6KA3/TLR5/IKBKG	7
BP	GO:0034166	toll-like receptor 10 signaling pathway	6/575	64/16266	0.0252345	0.618704	MEF2A/MEF2C/MAPK10/RPS6KA3/TLR5/IKBKG	6
BP	GO:0009581	detection of external stimulus	12/575	179/16266	0.025414	0.618704	PLEKHB1/COL11A1/GNB5/NOX3/FNTB/STRA6/LRP8/PLB1/BEST1/FNTA/PAWR/CNGA1	12
BP	GO:0045088	regulation of innate immune response	22/575	397/16266	0.0255479	0.618704	MEF2A/MEF2C/CYLD/TYRO3/MAPK10/ERBB2IP/SUMO1/TNFAIP3/TRIM6/PSME3/PPARG/ANKRD17/PUM1/CD36/SUSD4/PAK1/ADAM8/RPS6KA3/RNF135/TLR5/CLEC6A/IKBKG	22
BP	GO:0002218	activation of innate immune response	17/575	286/16266	0.0259619	0.618704	MEF2A/MEF2C/CYLD/TYRO3/MAPK10/ERBB2IP/TNFAIP3/PSME3/ANKRD17/PUM1/CD36/PAK1/ADAM8/RPS6KA3/TLR5/CLEC6A/IKBKG	17
BP	GO:0006275	regulation of DNA replication	9/575	120/16266	0.0264911	0.618704	STAG2/ACD/PPP2R1A/PPARG/ANKRD17/DNA2/RAD17/CTNNB1/CERS1	9
BP	GO:0071277	cellular response to calcium ion	5/575	48/16266	0.0266079	0.618704	MEF2A/MEF2C/CAPN3/CARF/ACER1	5
BP	GO:1903391	regulation of adherens junction organization	5/575	48/16266	0.0266079	0.618704	CLASP1/CORO1C/BCAS3/CLASP2/APOD	5
BP	GO:0006821	chloride transport	8/575	101/16266	0.026617	0.618704	CLCA1/TSPO/CLCC1/TTYH2/BEST1/NMUR1/P2RY6/GABRG3	8
BP	GO:0016202	regulation of striated muscle tissue development	8/575	101/16266	0.026617	0.618704	HDAC9/FGFR2/MEF2C/KCNK2/RPS6KB1/TSC22D3/CTNNB1/FGF3	8
BP	GO:0014706	striated muscle tissue development	19/575	332/16266	0.0272858	0.618704	DCN/HDAC9/COL11A1/FGFR2/MEF2A/MEF2C/KCNK2/NOX4/EYA1/MYH14/RPS6KB1/SOX6/MYL2/FOXP2/FHOD3/TSC22D3/LEMD2/CTNNB1/FGF3	19
BP	GO:0007044	cell-substrate junction assembly	7/575	83/16266	0.0273755	0.618704	CLASP1/CORO1C/BCAS3/DST/CLASP2/PLEC/APOD	7
BP	GO:0006855	drug transmembrane transport	3/575	19/16266	0.0279312	0.618704	ABCB1/SLC47A1/SLC22A5	3
BP	GO:0070242	thymocyte apoptotic process	3/575	19/16266	0.0279312	0.618704	ZC3H8/ADAM8/NFKBID	3
BP	GO:0071498	cellular response to fluid shear stress	3/575	19/16266	0.0279312	0.618704	MEF2C/MAP2K5/MTSS1	3
BP	GO:1903020	positive regulation of glycoprotein metabolic process	3/575	19/16266	0.0279312	0.618704	TCF7L2/CTNNB1/PAWR	3
BP	GO:1903319	positive regulation of protein maturation	3/575	19/16266	0.0279312	0.618704	ADAM8/CLEC3B/CCBE1	3
BP	GO:2000114	regulation of establishment of cell polarity	3/575	19/16266	0.0279312	0.618704	GATA3/BCAS3/GNB2L1	3
BP	GO:2000279	negative regulation of DNA biosynthetic process	3/575	19/16266	0.0279312	0.618704	KCNK2/PPARG/CERS1	3
BP	GO:0008630	intrinsic apoptotic signaling pathway in response to DNA damage	8/575	102/16266	0.0280254	0.618704	CD44/TNFRSF1A/CDIP1/MSH6/BCL2L2/PGAP2/MUC1/ERCC6	8
BP	GO:0051898	negative regulation of protein kinase B signaling	4/575	33/16266	0.0280863	0.618704	TSC2/LEMD2/MAGI2/GNB2L1	4
BP	GO:0034599	cellular response to oxidative stress	13/575	203/16266	0.0285389	0.618704	MGST1/ADNP2/SOD3/SOD2/TNFAIP3/CD36/IL18BP/FBLN5/MMP3/FANCC/DDIAS/PRDX2/GNB2L1	13
BP	GO:0048641	regulation of skeletal muscle tissue development	5/575	49/16266	0.0288005	0.618704	HDAC9/MEF2C/RPS6KB1/TSC22D3/CTNNB1	5
BP	GO:0042308	negative regulation of protein import into nucleus	6/575	66/16266	0.028848	0.618704	WWTR1/CYLD/CD36/AXIN2/APOD/LITAF	6
BP	GO:1904590	negative regulation of protein import	6/575	66/16266	0.028848	0.618704	WWTR1/CYLD/CD36/AXIN2/APOD/LITAF	6
BP	GO:0010035	response to inorganic substance	24/575	448/16266	0.0288644	0.618704	MEF2A/ATP12A/MEF2C/CAPN3/TSPO/SOD3/SOD2/TNFAIP3/FNTB/PPARG/NTS/CD36/APTX/IL18BP/CARF/FBLN5/MMP3/FANCC/ACER1/PRDX2/PAWR/GNB2L1/LTC4S/ERCC6	24
BP	GO:0072073	kidney epithelium development	10/575	142/16266	0.029336	0.618704	WWTR1/CD44/FGFR2/ACAT1/MEF2C/EYA1/GATA3/CTNNB1/MTSS1/MAGI2	10
BP	GO:2001233	regulation of apoptotic signaling pathway	21/575	380/16266	0.0294102	0.618704	CD44/CYLD/EYA1/PPP2R1A/RPS6KB1/SOD2/IVNS1ABP/TNFAIP3/SPOP/BCL2L2/PSME3/MAP2K5/TCF7L2/PGAP2/RPS3/PRDX2/CTNNB1/CRADD/PARL/MUC1/GNB2L1	21
BP	GO:0048634	regulation of muscle organ development	8/575	103/16266	0.0294846	0.618704	HDAC9/FGFR2/MEF2C/KCNK2/RPS6KB1/TSC22D3/CTNNB1/FGF3	8
BP	GO:1901861	regulation of muscle tissue development	8/575	103/16266	0.0294846	0.618704	HDAC9/FGFR2/MEF2C/KCNK2/RPS6KB1/TSC22D3/CTNNB1/FGF3	8
BP	GO:0009582	detection of abiotic stimulus	12/575	183/16266	0.0294947	0.618704	PLEKHB1/COL11A1/GNB5/NOX3/FNTB/STRA6/LRP8/PLB1/BEST1/FNTA/PAWR/CNGA1	12
BP	GO:0006281	DNA repair	24/575	449/16266	0.0295226	0.618704	ASTE1/KIF22/POLI/EYA1/RPA3/RECQL5/SUMO1/MSH6/CHD1L/APTX/DNA2/BARD1/NEIL1/RPS3/CHEK1/ORAOV1/RAD17/SMG1/FANCC/AXIN2/STRA13/RHNO1/RUVBL1/ERCC6	24
BP	GO:0046717	acid secretion	8/575	104/16266	0.0309952	0.643351	RIMS1/NMU/SLC1A2/SGK1/GIPC1/GLS2/PAK1/GRM2	8
BP	GO:0045453	bone resorption	5/575	50/16266	0.0311041	0.643351	NOX4/TNFAIP3/ADAM8/TPP1/CTNNB1	5
BP	GO:0007020	microtubule nucleation	3/575	20/16266	0.032019	0.643351	CLASP1/TUBGCP4/CLASP2	3
BP	GO:0021801	cerebral cortex radial glia guided migration	3/575	20/16266	0.032019	0.643351	LRP8/CTNNB1/ADGRG1	3
BP	GO:0022030	telencephalon glial cell migration	3/575	20/16266	0.032019	0.643351	LRP8/CTNNB1/ADGRG1	3
BP	GO:0045815	positive regulation of gene expression, epigenetic	3/575	20/16266	0.032019	0.643351	ARID1B/CHEK1/CTNNB1	3
BP	GO:0060438	trachea development	3/575	20/16266	0.032019	0.643351	HYDIN/EDA/CTNNB1	3
BP	GO:0070230	positive regulation of lymphocyte apoptotic process	3/575	20/16266	0.032019	0.643351	ZC3H8/ADAM8/NFKBID	3
BP	GO:0032088	negative regulation of NF-kappaB transcription factor activity	6/575	68/16266	0.0327863	0.6517	CYLD/ERBB2IP/TNFAIP3/MAP2K5/NFKBID/PRDX2	6
BP	GO:0071396	cellular response to lipid	21/575	385/16266	0.0331945	0.6517	MEF2C/TSPO/ADNP2/CYP27B1/PDE4D/NR3C1/NR5A2/TNFAIP3/NR4A1/PPARG/NTS/CD36/BCAS3/LRP8/T/PRDX2/P2RY6/PAWR/TLR5/LITAF/LTC4S	21
BP	GO:0035304	regulation of protein dephosphorylation	10/575	145/16266	0.0332041	0.6517	PPP1R12A/WNK1/MEF2C/PPP2R1A/PPP1R7/PPP2R4/SYTL2/PAWR/MAGI2/SEMA4D	10
BP	GO:0009583	detection of light stimulus	9/575	125/16266	0.0332705	0.6517	PLEKHB1/GNB5/FNTB/STRA6/LRP8/PLB1/BEST1/FNTA/CNGA1	9
BP	GO:0010921	regulation of phosphatase activity	9/575	125/16266	0.0332705	0.6517	PPP1R12A/WNK1/MEF2C/PPP2R1A/PPP2R4/SYTL2/PAWR/MAGI2/SEMA4D	9
BP	GO:1904035	regulation of epithelial cell apoptotic process	5/575	51/16266	0.0335199	0.653272	GATA3/TNFAIP3/SPOP/TCF7L2/ANGPTL4	5
BP	GO:0042339	keratan sulfate metabolic process	4/575	35/16266	0.0340211	0.653272	ST3GAL6/OGN/ST3GAL5/B4GALT4	4
BP	GO:0051293	establishment of spindle localization	4/575	35/16266	0.0340211	0.653272	MAP4/CLASP1/EYA1/DYNC1H1	4
BP	GO:0070232	regulation of T cell apoptotic process	4/575	35/16266	0.0340211	0.653272	ZC3H8/ADAM8/TSC22D3/NFKBID	4
BP	GO:2001242	regulation of intrinsic apoptotic signaling pathway	10/575	147/16266	0.0359732	0.656858	CD44/CYLD/SOD2/IVNS1ABP/SPOP/BCL2L2/PGAP2/PARL/MUC1/GNB2L1	10
BP	GO:1900407	regulation of cellular response to oxidative stress	5/575	52/16266	0.0360492	0.656858	SOD2/CD36/FBLN5/MMP3/GNB2L1	5
BP	GO:0007030	Golgi organization	7/575	88/16266	0.0360924	0.656858	CLASP1/COG4/ATL2/SYNE1/KIFC3/BCAS3/CLASP2	7
BP	GO:0060349	bone morphogenesis	7/575	88/16266	0.0360924	0.656858	FGFR2/MEF2C/COMP/PAX1/POR/T/AXIN2	7
BP	GO:0009214	cyclic nucleotide catabolic process	3/575	21/16266	0.036401	0.656858	PDE4A/PDE4D/GNB2L1	3
BP	GO:0048485	sympathetic nervous system development	3/575	21/16266	0.036401	0.656858	GATA3/GFRA3/CTNNB1	3
BP	GO:0097503	sialylation	3/575	21/16266	0.036401	0.656858	ST3GAL6/ST3GAL5/ST8SIA3	3
BP	GO:2000573	positive regulation of DNA biosynthetic process	3/575	21/16266	0.036401	0.656858	NOX4/ACD/CTNNB1	3
BP	GO:0038123	toll-like receptor TLR1:TLR2 signaling pathway	6/575	70/16266	0.0370578	0.656858	MEF2A/MEF2C/MAPK10/CD36/RPS6KA3/IKBKG	6
BP	GO:0038124	toll-like receptor TLR6:TLR2 signaling pathway	6/575	70/16266	0.0370578	0.656858	MEF2A/MEF2C/MAPK10/CD36/RPS6KA3/IKBKG	6
BP	GO:0010559	regulation of glycoprotein biosynthetic process	4/575	36/16266	0.037241	0.656858	FKTN/TCF7L2/CTNNB1/PAWR	4
BP	GO:0016056	rhodopsin mediated signaling pathway	4/575	36/16266	0.037241	0.656858	GNB5/FNTB/FNTA/CNGA1	4
BP	GO:0034405	response to fluid shear stress	4/575	36/16266	0.037241	0.656858	MEF2C/NCF2/MAP2K5/MTSS1	4
BP	GO:0045824	negative regulation of innate immune response	4/575	36/16266	0.037241	0.656858	TYRO3/TNFAIP3/PPARG/SUSD4	4
BP	GO:0045933	positive regulation of muscle contraction	4/575	36/16266	0.037241	0.656858	NMU/ADRA1D/SPHK1/PAWR	4
BP	GO:0050873	brown fat cell differentiation	4/575	36/16266	0.037241	0.656858	PPARG/PRDM16/PEX11A/METRNL	4
BP	GO:0070423	nucleotide-binding oligomerization domain containing signaling pathway	4/575	36/16266	0.037241	0.656858	CYLD/ERBB2IP/TNFAIP3/IKBKG	4
BP	GO:0072665	protein localization to vacuole	4/575	36/16266	0.037241	0.656858	VTI1B/SNX16/TNFAIP3/VPS13A	4
BP	GO:2000377	regulation of reactive oxygen species metabolic process	10/575	148/16266	0.0374162	0.656974	NOX4/TSPO/AGXT2/CD36/FBLN5/MMP3/PRDX2/PARL/TLR5/DDAH2	10
BP	GO:1901565	organonitrogen compound catabolic process	19/575	346/16266	0.0390396	0.681625	DCN/CD44/PDE4A/ACAT1/OGN/PDE4D/AGXT2/GLS2/SDSL/NEIL1/ALDH1L1/HPD/CDA/TPP1/ACER1/SPHK1/LRTOMT/GNB2L1/DDAH2	19
BP	GO:0019751	polyol metabolic process	8/575	109/16266	0.0393447	0.681625	SPHK2/CYP27B1/EPM2A/PLCB2/MOGAT2/ACER1/PPIP5K1/SPHK1	8
BP	GO:1903650	negative regulation of cytoplasmic transport	8/575	109/16266	0.0393447	0.681625	WWTR1/CYLD/CD36/BARD1/AXIN2/APOD/LITAF/MRLN	8
BP	GO:0014910	regulation of smooth muscle cell migration	4/575	37/16266	0.0406301	0.697951	NOX4/RPS6KB1/PDE4D/P2RY6	4
BP	GO:0030203	glycosaminoglycan metabolic process	11/575	171/16266	0.0406452	0.697951	DCN/XYLT2/CD44/ST3GAL6/OGN/GCNT2/ST3GAL5/B4GALT4/ITIH3/NDNF/SPOCK3	11
BP	GO:0009584	detection of visible light	8/575	110/16266	0.0411783	0.698548	GNB5/FNTB/STRA6/LRP8/PLB1/BEST1/FNTA/CNGA1	8
BP	GO:0030239	myofibril assembly	5/575	54/16266	0.0414521	0.698548	MEF2A/CAPN3/MYL2/LDB3/FHOD3	5
BP	GO:0032231	regulation of actin filament bundle assembly	6/575	72/16266	0.0416697	0.698548	CLASP1/NOX4/ASAP3/PAK1/CLASP2/MTSS1	6
BP	GO:1900181	negative regulation of protein localization to nucleus	6/575	72/16266	0.0416697	0.698548	WWTR1/CYLD/CD36/AXIN2/APOD/LITAF	6
BP	GO:0009612	response to mechanical stimulus	12/575	193/16266	0.0417303	0.698548	DCN/COL11A1/TNFRSF1A/KCNK2/RPS6KB1/FOXP2/PPARG/STRA6/CHEK1/CRADD/PAWR/TLR5	12
BP	GO:0035303	regulation of dephosphorylation	10/575	151/16266	0.0419843	0.698548	PPP1R12A/WNK1/MEF2C/PPP2R1A/PPP1R7/PPP2R4/SYTL2/PAWR/MAGI2/SEMA4D	10
BP	GO:1903035	negative regulation of response to wounding	10/575	151/16266	0.0419843	0.698548	TNFRSF1A/CLASP1/TYRO3/GATA3/TNFAIP3/PPARG/CLASP2/C1QTNF1/METRNL/APOD	10
BP	GO:2001243	negative regulation of intrinsic apoptotic signaling pathway	7/575	91/16266	0.0421136	0.698548	CD44/SOD2/IVNS1ABP/BCL2L2/PGAP2/PARL/MUC1	7
BP	GO:0008347	glial cell migration	4/575	38/16266	0.0441885	0.719946	TSPO/LRP8/CTNNB1/ADGRG1	4
BP	GO:0031670	cellular response to nutrient	4/575	38/16266	0.0441885	0.719946	CYP27B1/PPARG/PAWR/LTC4S	4
BP	GO:2001237	negative regulation of extrinsic apoptotic signaling pathway	7/575	92/16266	0.0442568	0.719946	EYA1/RPS6KB1/TNFAIP3/PSME3/MAP2K5/TCF7L2/PRDX2	7
BP	GO:0014823	response to activity	5/575	55/16266	0.0443271	0.719946	CAPN3/NCF2/HADH/METRNL/ADSL	5
BP	GO:0060425	lung morphogenesis	5/575	55/16266	0.0443271	0.719946	FGFR2/PLOD3/FOXP2/TMTC3/CTNNB1	5
BP	GO:0015698	inorganic anion transport	9/575	132/16266	0.0446476	0.722142	CLCA1/SLC4A11/TSPO/CLCC1/TTYH2/BEST1/NMUR1/P2RY6/GABRG3	9
BP	GO:0007602	phototransduction	8/575	112/16266	0.0450136	0.723532	PLEKHB1/GNB5/FNTB/STRA6/LRP8/PLB1/FNTA/CNGA1	8
BP	GO:0007026	negative regulation of microtubule depolymerization	3/575	23/16266	0.0460328	0.723532	CLASP1/STMN2/CLASP2	3
BP	GO:0032878	regulation of establishment or maintenance of cell polarity	3/575	23/16266	0.0460328	0.723532	GATA3/BCAS3/GNB2L1	3
BP	GO:0042554	superoxide anion generation	3/575	23/16266	0.0460328	0.723532	NOX3/NOX4/NCF2	3
BP	GO:0044319	wound healing, spreading of cells	3/575	23/16266	0.0460328	0.723532	CLASP1/RHOC/CLASP2	3
BP	GO:0072337	modified amino acid transport	3/575	23/16266	0.0460328	0.723532	FOLR3/SLC16A10/SLC22A5	3
BP	GO:0090505	epiboly involved in wound healing	3/575	23/16266	0.0460328	0.723532	CLASP1/RHOC/CLASP2	3
BP	GO:0072006	nephron development	9/575	133/16266	0.0464612	0.724595	WWTR1/CD44/ACAT1/MEF2C/EYA1/GATA3/CTNNB1/MTSS1/MAGI2	9
BP	GO:0007052	mitotic spindle organization	6/575	74/16266	0.0466279	0.724595	MAP4/CLASP1/PPP2R4/TUBGCP4/CLASP2/DYNC1H1	6
BP	GO:0045089	positive regulation of innate immune response	18/575	331/16266	0.0472551	0.724595	MEF2A/MEF2C/CYLD/TYRO3/MAPK10/ERBB2IP/TNFAIP3/TRIM6/PSME3/ANKRD17/PUM1/CD36/PAK1/ADAM8/RPS6KA3/TLR5/CLEC6A/IKBKG	18
BP	GO:0043487	regulation of RNA stability	5/575	56/16266	0.0473186	0.724595	CIRBP/PUM1/AXIN2/NLRP5/BRF1	5
BP	GO:1902882	regulation of response to oxidative stress	5/575	56/16266	0.0473186	0.724595	SOD2/CD36/FBLN5/MMP3/GNB2L1	5
BP	GO:0051653	spindle localization	4/575	39/16266	0.0479159	0.724595	MAP4/CLASP1/EYA1/DYNC1H1	4
BP	GO:0051052	regulation of DNA metabolic process	16/575	286/16266	0.0479333	0.724595	KCNK2/NOX4/STAG2/ACD/EYA1/PPP2R1A/MSH6/PPARG/ANKRD17/DNA2/RPS3/CHEK1/RAD17/CTNNB1/AXIN2/CERS1	16
BP	GO:0002062	chondrocyte differentiation	7/575	94/16266	0.0487506	0.724595	COL11A1/MEF2C/SOX6/POR/KIAA1715/CTNNB1/AXIN2	7
BP	GO:0050728	negative regulation of inflammatory response	7/575	94/16266	0.0487506	0.724595	TNFRSF1A/TYRO3/GATA3/TNFAIP3/PPARG/METRNL/APOD	7
BP	GO:0046209	nitric oxide metabolic process	6/575	75/16266	0.0492384	0.724595	TSPO/AGXT2/POR/PTS/TLR5/DDAH2	6
BP	GO:0001558	regulation of cell growth	19/575	356/16266	0.0494543	0.724595	RIMS1/SMARCA2/ADNP2/SGK3/PPP2R1A/CYP27B1/MYL2/SGK1/SMARCA4/PPARG/MAP2K5/FBLN5/CDA/CLASP2/SPHK1/RPS6KA3/SLIT3/SEMA4D/GNB2L1	19
BP	GO:1902532	negative regulation of intracellular signal transduction	21/575	403/16266	0.0498588	0.724595	CD44/CYLD/TSC2/PPP2R1A/FKTN/SOD2/ERBB2IP/IVNS1ABP/RGS4/TNFAIP3/MAPKAP1/BCL2L2/PGAP2/UCHL1/LEMD2/NFKBID/PARL/MUC1/MAGI2/LITAF/GNB2L1	21
BP	GO:0022408	negative regulation of cell-cell adhesion	9/575	135/16266	0.050234	0.724595	CYLD/FXYD5/BTN2A2/MAP2K5/ZC3H8/NFKBID/PRDX2/C1QTNF1/PAWR	9
BP	GO:0043666	regulation of phosphoprotein phosphatase activity	5/575	57/16266	0.0504269	0.724595	PPP1R12A/PPP2R1A/PPP2R4/PAWR/MAGI2	5
BP	GO:0003231	cardiac ventricle development	7/575	95/16266	0.0511022	0.724595	COL11A1/FGFR2/MEF2C/KCNK2/GATA3/MYL2/STRA6	7
BP	GO:0010634	positive regulation of epithelial cell migration	7/575	95/16266	0.0511022	0.724595	HDAC9/CLASP1/GATA3/BCAS3/CLASP2/CCBE1/FGF16	7
BP	GO:0006541	glutamine metabolic process	3/575	24/16266	0.0512729	0.724595	PHGDH/GLS2/GMPS	3
BP	GO:0021513	spinal cord dorsal/ventral patterning	3/575	24/16266	0.0512729	0.724595	LHX3/DBX1/FOXN4	3
BP	GO:0090504	epiboly	3/575	24/16266	0.0512729	0.724595	CLASP1/RHOC/CLASP2	3
BP	GO:1990090	cellular response to nerve growth factor stimulus	3/575	24/16266	0.0512729	0.724595	STMN2/NTS/MAGI2	3
BP	GO:2000352	negative regulation of endothelial cell apoptotic process	3/575	24/16266	0.0512729	0.724595	GATA3/TNFAIP3/ANGPTL4	3
BP	GO:0006022	aminoglycan metabolic process	11/575	178/16266	0.0516206	0.724595	DCN/XYLT2/CD44/ST3GAL6/OGN/GCNT2/ST3GAL5/B4GALT4/ITIH3/NDNF/SPOCK3	11
BP	GO:0016049	cell growth	23/575	452/16266	0.0517428	0.724595	RIMS1/SMARCA2/ADNP2/SGK3/PPP2R1A/CYP27B1/MYL2/ERBB2IP/LAMTOR2/SGK1/SMARCA4/PPARG/MAP2K5/FBLN5/CDA/CLASP2/NDNF/SPHK1/RPS6KA3/SLIT3/SEMA4D/SLC9A6/GNB2L1	23
BP	GO:0046173	polyol biosynthetic process	4/575	40/16266	0.0518118	0.724595	SPHK2/CYP27B1/ACER1/SPHK1	4
BP	GO:0048863	stem cell differentiation	14/575	244/16266	0.0518803	0.724595	WWTR1/FGFR2/CLASP1/MEF2C/SOX6/CORO1C/GCNT2/PUM1/GPM6A/CLASP2/T/CTNNB1/AXIN2/N4BP2L2	14
BP	GO:0033077	T cell differentiation in thymus	6/575	76/16266	0.051937	0.724595	GATA3/ZC3H8/ADAM8/NFKBID/CTNNB1/RAG2	6
BP	GO:0071594	thymocyte aggregation	6/575	76/16266	0.051937	0.724595	GATA3/ZC3H8/ADAM8/NFKBID/CTNNB1/RAG2	6
BP	GO:0045165	cell fate commitment	15/575	267/16266	0.0526462	0.724595	FGFR2/MEF2C/EYA1/LHX3/GATA3/TLX1/DBX1/SOX6/MYL2/PPARG/FOXN4/TCF7L2/CTNNB1/RAG2/FGF3	15
BP	GO:0034332	adherens junction organization	8/575	116/16266	0.05337	0.724595	CLASP1/CORO1C/BCAS3/TBCD/CLASP2/CTNNB1/MTSS1/APOD	8
BP	GO:0007603	phototransduction, visible light	7/575	96/16266	0.0535243	0.724595	GNB5/FNTB/STRA6/LRP8/PLB1/FNTA/CNGA1	7
BP	GO:0034644	cellular response to UV	5/575	58/16266	0.0536522	0.724595	POLI/CHEK1/DDIAS/RHNO1/CERS1	5
BP	GO:0001894	tissue homeostasis	12/575	201/16266	0.053783	0.724595	USH2A/NOX4/GCNT2/TNFAIP3/BARD1/ILDR2/ADAM8/TPP1/CTNNB1/MUC13/SLC22A5/ERCC6	12
BP	GO:0060249	anatomical structure homeostasis	17/575	314/16266	0.0545315	0.724595	USH2A/NOX4/TYRO3/CAPN3/ACD/RPA3/GCNT2/TNFAIP3/DNA2/BARD1/ILDR2/ADAM8/TPP1/CTNNB1/MUC13/SLC22A5/ERCC6	17
BP	GO:0008643	carbohydrate transport	11/575	180/16266	0.0550902	0.724595	TSC2/GCK/RPS6KB1/SLC2A9/SLC1A2/SLC35A3/NUP85/SLC35A5/SLC35A1/ASPSCR1/REPIN1	11
BP	GO:0006768	biotin metabolic process	2/575	11/16266	0.0555436	0.724595	PCCB/PC	2
BP	GO:0007638	mechanosensory behavior	2/575	11/16266	0.0555436	0.724595	FOXP2/STRA6	2
BP	GO:0021521	ventral spinal cord interneuron specification	2/575	11/16266	0.0555436	0.724595	LHX3/DBX1	2
BP	GO:0042511	positive regulation of tyrosine phosphorylation of Stat1 protein	2/575	11/16266	0.0555436	0.724595	TNFRSF1A/TNFRSF18	2
BP	GO:0042953	lipoprotein transport	2/575	11/16266	0.0555436	0.724595	PPARG/CD36	2
BP	GO:0044872	lipoprotein localization	2/575	11/16266	0.0555436	0.724595	PPARG/CD36	2
BP	GO:0045945	positive regulation of transcription from RNA polymerase III promoter	2/575	11/16266	0.0555436	0.724595	ZC3H8/BRF1	2
BP	GO:0060456	positive regulation of digestive system process	2/575	11/16266	0.0555436	0.724595	PAWR/SLC22A5	2
BP	GO:0060502	epithelial cell proliferation involved in lung morphogenesis	2/575	11/16266	0.0555436	0.724595	FGFR2/FOXP2	2
BP	GO:0060573	cell fate specification involved in pattern specification	2/575	11/16266	0.0555436	0.724595	LHX3/DBX1	2
BP	GO:0070431	nucleotide-binding oligomerization domain containing 2 signaling pathway	2/575	11/16266	0.0555436	0.724595	ERBB2IP/TNFAIP3	2
BP	GO:0090030	regulation of steroid hormone biosynthetic process	2/575	11/16266	0.0555436	0.724595	NR3C1/POR	2
BP	GO:1901201	regulation of extracellular matrix assembly	2/575	11/16266	0.0555436	0.724595	CLASP1/CLASP2	2
BP	GO:1903018	regulation of glycoprotein metabolic process	4/575	41/16266	0.0558755	0.724595	FKTN/TCF7L2/CTNNB1/PAWR	4
BP	GO:0006029	proteoglycan metabolic process	7/575	97/16266	0.056017	0.724595	DCN/XYLT2/COL11A1/TCF7L2/CTNNB1/NDNF/SPOCK3	7
BP	GO:0006665	sphingolipid metabolic process	9/575	138/16266	0.0562621	0.724595	SPHK2/ST3GAL6/PPP2R1A/ST3GAL5/FAM57B/ACER1/SPHK1/ST8SIA3/CERS1	9
BP	GO:0043433	negative regulation of sequence-specific DNA binding transcription factor activity	9/575	138/16266	0.0562621	0.724595	CYLD/ERBB2IP/SUMO1/TNFAIP3/SPOP/MAP2K5/TCF7L2/NFKBID/PRDX2	9
BP	GO:0051640	organelle localization	21/575	409/16266	0.0565582	0.724595	C12orf4/MAP4/FGFR2/MEF2A/CLASP1/STXBP2/KIF22/RIMS1/ARFGAP1/EYA1/SYNE1/CLUH/SYTL2/CACFD1/CLASP2/CTNNB1/CHMP6/VPS33B/MAGI2/DYNC1H1/IKBKG	21
BP	GO:0031114	regulation of microtubule depolymerization	3/575	25/16266	0.056788	0.724595	CLASP1/STMN2/CLASP2	3
BP	GO:0040036	regulation of fibroblast growth factor receptor signaling pathway	3/575	25/16266	0.056788	0.724595	FGFR2/GATA3/CTNNB1	3
BP	GO:0048643	positive regulation of skeletal muscle tissue development	3/575	25/16266	0.056788	0.724595	MEF2C/RPS6KB1/CTNNB1	3
BP	GO:0060351	cartilage development involved in endochondral bone morphogenesis	3/575	25/16266	0.056788	0.724595	COMP/POR/AXIN2	3
BP	GO:0007369	gastrulation	11/575	181/16266	0.056882	0.724595	COL11A1/FGFR2/CLASP1/WLS/COL4A2/MAP2K5/CLASP2/T/CTNNB1/TGIF1/GNB2L1	11
BP	GO:0048839	inner ear development	11/575	181/16266	0.056882	0.724595	USH2A/COL11A1/FGFR2/NOX3/KCNK2/EYA1/LHX3/GATA3/TMIE/LRTOMT/FGF3	11
BP	GO:0030282	bone mineralization	7/575	98/16266	0.0585807	0.729546	FGFR2/MEF2C/FBXL15/CYP27B1/CLEC3B/AXIN2/MTSS1	7
BP	GO:0030522	intracellular receptor signaling pathway	16/575	294/16266	0.0585959	0.729546	CYLD/CYP27B1/ERBB2IP/NR3C1/NR5A2/TNFAIP3/NR4A1/SMARCA4/PPARG/ANKRD17/PUM1/PAK1/GRIP1/CTNNB1/TGIF1/IKBKG	16
BP	GO:0042771	intrinsic apoptotic signaling pathway in response to DNA damage by p53 class mediator	4/575	42/16266	0.0601056	0.729546	CD44/CDIP1/PGAP2/MUC1	4
BP	GO:0045620	negative regulation of lymphocyte differentiation	4/575	42/16266	0.0601056	0.729546	CYLD/ZC3H8/NFKBID/PRDX2	4
BP	GO:0071222	cellular response to lipopolysaccharide	9/575	140/16266	0.0605304	0.729546	MEF2C/TSPO/PDE4D/TNFAIP3/CD36/PRDX2/TLR5/LITAF/LTC4S	9
BP	GO:2001057	reactive nitrogen species metabolic process	6/575	79/16266	0.060565	0.729546	TSPO/AGXT2/POR/PTS/TLR5/DDAH2	6
BP	GO:0043583	ear development	12/575	205/16266	0.0606121	0.729546	USH2A/COL11A1/FGFR2/NOX3/KCNK2/EYA1/LHX3/GATA3/STRA6/TMIE/LRTOMT/FGF3	12
BP	GO:0090317	negative regulation of intracellular protein transport	7/575	99/16266	0.0612157	0.729546	WWTR1/CYLD/CD36/BARD1/AXIN2/APOD/LITAF	7
BP	GO:0035239	tube morphogenesis	19/575	366/16266	0.0617126	0.729546	CD44/FGFR2/MEF2C/TSC2/EYA1/GATA3/NR3C1/STRA6/TMTC3/FOXN4/BCAS3/PAK1/EDA/T/CTNNB1/SEMA4C/MTSS1/TGIF1/FGF3	19
BP	GO:0001573	ganglioside metabolic process	3/575	26/16266	0.0625716	0.729546	ST3GAL6/ST3GAL5/ST8SIA3	3
BP	GO:0003179	heart valve morphogenesis	3/575	26/16266	0.0625716	0.729546	MEF2C/GATA3/STRA6	3
BP	GO:0006688	glycosphingolipid biosynthetic process	3/575	26/16266	0.0625716	0.729546	ST3GAL6/ST3GAL5/ST8SIA3	3
BP	GO:0006862	nucleotide transport	3/575	26/16266	0.0625716	0.729546	SLC35A3/SLC35A5/SLC35A1	3
BP	GO:0015012	heparan sulfate proteoglycan biosynthetic process	3/575	26/16266	0.0625716	0.729546	XYLT2/TCF7L2/CTNNB1	3
BP	GO:0015893	drug transport	3/575	26/16266	0.0625716	0.729546	ABCB1/SLC47A1/SLC22A5	3
BP	GO:0021511	spinal cord patterning	3/575	26/16266	0.0625716	0.729546	LHX3/DBX1/FOXN4	3
BP	GO:0030325	adrenal gland development	3/575	26/16266	0.0625716	0.729546	TSPO/NR3C1/STRA6	3
BP	GO:0000184	nuclear-transcribed mRNA catabolic process, nonsense-mediated decay	8/575	120/16266	0.0626606	0.729546	RPS20/PPP2R1A/RPL34/RPS15A/PARN/RPS3/SMG1/RPL23A	8
BP	GO:0010212	response to ionizing radiation	9/575	141/16266	0.0627401	0.729546	NOX4/EYA1/EEF1D/GATA3/INTS7/DDIAS/XRRA1/RHNO1/ERCC6	9
BP	GO:0031109	microtubule polymerization or depolymerization	6/575	80/16266	0.063619	0.729546	CLASP1/STMN2/TUBGCP4/TBCD/TPPP3/CLASP2	6
BP	GO:0046323	glucose import	6/575	80/16266	0.063619	0.729546	TSC2/RPS6KB1/SLC2A9/SLC1A2/ASPSCR1/REPIN1	6
BP	GO:0061333	renal tubule morphogenesis	6/575	80/16266	0.063619	0.729546	CD44/MEF2C/EYA1/GATA3/CTNNB1/MTSS1	6
BP	GO:0034111	negative regulation of homotypic cell-cell adhesion	7/575	100/16266	0.0639222	0.729546	CYLD/BTN2A2/ZC3H8/NFKBID/PRDX2/C1QTNF1/PAWR	7
BP	GO:0010595	positive regulation of endothelial cell migration	5/575	61/16266	0.0640302	0.729546	HDAC9/GATA3/BCAS3/CCBE1/FGF16	5
BP	GO:0034330	cell junction organization	14/575	252/16266	0.0642614	0.729546	CLASP1/CORO1C/INADL/KIFC3/BCAS3/TBCD/DST/RHOC/CLDN14/CLASP2/CTNNB1/MTSS1/PLEC/APOD	14
BP	GO:0014909	smooth muscle cell migration	4/575	43/16266	0.0645008	0.729546	NOX4/RPS6KB1/PDE4D/P2RY6	4
BP	GO:2001020	regulation of response to DNA damage stimulus	9/575	142/16266	0.0650006	0.729546	CD44/EYA1/NEK4/RNASEH2B/PGAP2/RPS3/CHEK1/AXIN2/MUC1	9
BP	GO:0009617	response to bacterium	24/575	488/16266	0.0651064	0.729546	MGST1/FMO1/DCN/TNFRSF1A/MEF2C/TSPO/RPS6KB1/CYP27B1/ERBB2IP/PDE4D/NCF2/TNFAIP3/TRIM6/HTN1/ANKRD17/CD36/IL18BP/PRDX2/RPS6KA3/PAWR/PLA2G6/TLR5/LITAF/LTC4S	24
BP	GO:0001840	neural plate development	2/575	12/16266	0.0651293	0.729546	T/CTNNB1	2
BP	GO:0003376	sphingosine-1-phosphate signaling pathway	2/575	12/16266	0.0651293	0.729546	SPHK2/SPHK1	2
BP	GO:0010715	regulation of extracellular matrix disassembly	2/575	12/16266	0.0651293	0.729546	CLASP1/CLASP2	2
BP	GO:0031581	hemidesmosome assembly	2/575	12/16266	0.0651293	0.729546	DST/PLEC	2
BP	GO:0032354	response to follicle-stimulating hormone	2/575	12/16266	0.0651293	0.729546	POR/PAWR	2
BP	GO:0039535	regulation of RIG-I signaling pathway	2/575	12/16266	0.0651293	0.729546	ANKRD17/PUM1	2
BP	GO:0050872	white fat cell differentiation	2/575	12/16266	0.0651293	0.729546	PPARG/PRDM16	2
BP	GO:0060099	regulation of phagocytosis, engulfment	2/575	12/16266	0.0651293	0.729546	PPARG/CD36	2
BP	GO:0060742	epithelial cell differentiation involved in prostate gland development	2/575	12/16266	0.0651293	0.729546	FGFR2/CTNNB1	2
BP	GO:0070633	transepithelial transport	2/575	12/16266	0.0651293	0.729546	BEST1/P2RY6	2
BP	GO:1904356	regulation of telomere maintenance via telomere lengthening	2/575	12/16266	0.0651293	0.729546	ACD/CTNNB1	2
BP	GO:2000679	positive regulation of transcription regulatory region DNA binding	2/575	12/16266	0.0651293	0.729546	GATA3/TRIM6	2
BP	GO:0006892	post-Golgi vesicle-mediated transport	8/575	121/16266	0.0651314	0.729546	SCFD1/VTI1B/SH3D19/PUM1/STEAP2/VPS13A/GNB2L1/CORO7	8
BP	GO:0009411	response to UV	8/575	121/16266	0.0651314	0.729546	CIRBP/POLI/MSH6/CHEK1/DDIAS/RHNO1/CERS1/ERCC6	8
BP	GO:0006260	DNA replication	16/575	300/16266	0.0675916	0.749207	POLI/STAG2/ACD/PPP2R1A/RPA3/RECQL5/PPARG/ANKRD17/DNA2/CHEK1/RAD17/NFIA/CTNNB1/STRA13/REPIN1/CERS1	16
BP	GO:0007051	spindle organization	8/575	122/16266	0.0676617	0.749207	MAP4/CLASP1/HAUS4/PPP2R1A/PPP2R4/TUBGCP4/CLASP2/DYNC1H1	8
BP	GO:0003208	cardiac ventricle morphogenesis	5/575	62/16266	0.0677227	0.749207	COL11A1/FGFR2/MEF2C/GATA3/MYL2	5
BP	GO:0033081	regulation of T cell differentiation in thymus	3/575	27/16266	0.0686165	0.749207	ZC3H8/ADAM8/NFKBID	3
BP	GO:0051294	establishment of spindle orientation	3/575	27/16266	0.0686165	0.749207	MAP4/CLASP1/EYA1	3
BP	GO:0098657	import into cell	3/575	27/16266	0.0686165	0.749207	SLC7A1/STEAP2/PAWR	3
BP	GO:1902230	negative regulation of intrinsic apoptotic signaling pathway in response to DNA damage	3/575	27/16266	0.0686165	0.749207	CD44/PGAP2/MUC1	3
BP	GO:1990089	response to nerve growth factor	3/575	27/16266	0.0686165	0.749207	STMN2/NTS/MAGI2	3
BP	GO:2000398	regulation of thymocyte aggregation	3/575	27/16266	0.0686165	0.749207	ZC3H8/ADAM8/NFKBID	3
BP	GO:0060428	lung epithelium development	4/575	44/16266	0.0690593	0.750921	FGFR2/EYA1/FOXP2/STRA6	4
BP	GO:0048145	regulation of fibroblast proliferation	6/575	82/16266	0.0699941	0.750921	FNTB/PPARG/RNASEH2B/CTNNB1/SPHK1/TGIF1	6
BP	GO:0051897	positive regulation of protein kinase B signaling	6/575	82/16266	0.0699941	0.750921	NOX4/GATA3/GCNT2/TCF7L2/ADAM8/C1QTNF1	6
BP	GO:1902106	negative regulation of leukocyte differentiation	6/575	82/16266	0.0699941	0.750921	CYLD/PRDM16/ZC3H8/NFKBID/PRDX2/CTNNB1	6
BP	GO:2000379	positive regulation of reactive oxygen species metabolic process	6/575	82/16266	0.0699941	0.750921	NOX4/TSPO/AGXT2/CD36/TLR5/DDAH2	6
BP	GO:0003205	cardiac chamber development	8/575	123/16266	0.0702518	0.750921	COL11A1/FGFR2/MEF2C/KCNK2/GATA3/MYL2/STRA6/ANK2	8
BP	GO:0051250	negative regulation of lymphocyte activation	8/575	123/16266	0.0702518	0.750921	CYLD/TYRO3/TNFAIP3/BTN2A2/ZC3H8/NFKBID/PRDX2/PAWR	8
BP	GO:0031570	DNA integrity checkpoint	10/575	166/16266	0.0705036	0.750921	PSME3/RNASEH2B/DNA2/INTS7/CHEK1/ORAOV1/RAD17/CRADD/RHNO1/MUC1	10
BP	GO:0044272	sulfur compound biosynthetic process	11/575	188/16266	0.0705072	0.750921	MGST1/DCN/XYLT2/HAGH/ST3GAL6/OGN/ST3GAL5/B4GALT4/TCF7L2/MTHFD2L/CTNNB1	11
BP	GO:0061035	regulation of cartilage development	5/575	63/16266	0.071531	0.757061	SOX6/POR/KIAA1715/CTNNB1/AXIN2	5
BP	GO:0055001	muscle cell development	9/575	145/16266	0.0720876	0.757061	HDAC9/MEF2A/CAPN3/MYL2/LDB3/FHOD3/TMTC3/ANK2/UCHL1	9
BP	GO:0071241	cellular response to inorganic substance	9/575	145/16266	0.0720876	0.757061	MEF2A/MEF2C/CAPN3/TSPO/PPARG/NTS/CARF/MMP3/ACER1	9
BP	GO:0001837	epithelial to mesenchymal transition	7/575	103/16266	0.0724714	0.757061	WWTR1/FGFR2/CLASP1/GCNT2/CLASP2/CTNNB1/AXIN2	7
BP	GO:0071897	DNA biosynthetic process	8/575	124/16266	0.0729018	0.757061	KCNK2/NOX4/POLI/ACD/RPA3/PPARG/CTNNB1/CERS1	8
BP	GO:0003170	heart valve development	3/575	28/16266	0.0749149	0.757061	MEF2C/GATA3/STRA6	3
BP	GO:0006298	mismatch repair	3/575	28/16266	0.0749149	0.757061	RPA3/MSH6/AXIN2	3
BP	GO:0033014	tetrapyrrole biosynthetic process	3/575	28/16266	0.0749149	0.757061	SLC25A39/TSPO/MMAA	3
BP	GO:0060441	epithelial tube branching involved in lung morphogenesis	3/575	28/16266	0.0749149	0.757061	FGFR2/TMTC3/CTNNB1	3
BP	GO:0007216	G-protein coupled glutamate receptor signaling pathway	2/575	13/16266	0.0752179	0.757061	GRM1/GRM2	2
BP	GO:0007342	fusion of sperm to egg plasma membrane	2/575	13/16266	0.0752179	0.757061	IZUMO1/SERPINA5	2
BP	GO:0009437	carnitine metabolic process	2/575	13/16266	0.0752179	0.757061	POR/SLC22A5	2
BP	GO:0010172	embryonic body morphogenesis	2/575	13/16266	0.0752179	0.757061	CLASP1/CLASP2	2
BP	GO:0010885	regulation of cholesterol storage	2/575	13/16266	0.0752179	0.757061	PPARG/CD36	2
BP	GO:0046185	aldehyde catabolic process	2/575	13/16266	0.0752179	0.757061	HAGH/AGXT2	2
BP	GO:0046339	diacylglycerol metabolic process	2/575	13/16266	0.0752179	0.757061	LIPE/MOGAT2	2
BP	GO:0050855	regulation of B cell receptor signaling pathway	2/575	13/16266	0.0752179	0.757061	CMTM3/GCSAM	2
BP	GO:0055094	response to lipoprotein particle	2/575	13/16266	0.0752179	0.757061	PPARG/CD36	2
BP	GO:0089711	L-glutamate transmembrane transport	2/575	13/16266	0.0752179	0.757061	SLC1A2/SLC25A22	2
BP	GO:0090520	sphingolipid mediated signaling pathway	2/575	13/16266	0.0752179	0.757061	SPHK2/SPHK1	2
BP	GO:1902166	negative regulation of intrinsic apoptotic signaling pathway in response to DNA damage by p53 class mediator	2/575	13/16266	0.0752179	0.757061	CD44/MUC1	2
BP	GO:0051492	regulation of stress fiber assembly	5/575	64/16266	0.0754544	0.757061	CLASP1/NOX4/ASAP3/PAK1/CLASP2	5
BP	GO:0071248	cellular response to metal ion	8/575	125/16266	0.0756116	0.757061	MEF2A/MEF2C/CAPN3/TSPO/PPARG/NTS/CARF/ACER1	8
BP	GO:0016054	organic acid catabolic process	12/575	213/16266	0.0759391	0.757061	ACAT1/LIPE/SULT2A1/AGXT2/PCCB/GLS2/HADH/SDSL/ALDH1L1/MMAA/HPD/DDAH2	12
BP	GO:0046395	carboxylic acid catabolic process	12/575	213/16266	0.0759391	0.757061	ACAT1/LIPE/SULT2A1/AGXT2/PCCB/GLS2/HADH/SDSL/ALDH1L1/MMAA/HPD/DDAH2	12
BP	GO:1901214	regulation of neuron death	13/575	236/16266	0.0765069	0.758618	MEF2C/TYRO3/GATA3/SOD2/NR3C1/NCF2/CHL1/ADAM8/CTNNB1/NDNF/PAWR/GNB2L1/IKBKG	13
BP	GO:0051260	protein homooligomerization	14/575	259/16266	0.0765997	0.758618	MGST1/ACAT1/ATG16L1/SOD2/ATL2/KCNA6/PEX5/CDA/ANGPTL4/DCXR/KCNS3/C1QTNF1/GNB2L1/KCTD7	14
BP	GO:0048144	fibroblast proliferation	6/575	84/16266	0.0767246	0.758618	FNTB/PPARG/RNASEH2B/CTNNB1/SPHK1/TGIF1	6
BP	GO:0050851	antigen receptor-mediated signaling pathway	9/575	147/16266	0.0770684	0.758618	BTN3A1/MEF2C/GATA3/PDE4D/CMTM3/PAK1/GCSAM/PAWR/IKBKG	9
BP	GO:0071219	cellular response to molecule of bacterial origin	9/575	147/16266	0.0770684	0.758618	MEF2C/TSPO/PDE4D/TNFAIP3/CD36/PRDX2/TLR5/LITAF/LTC4S	9
BP	GO:0060538	skeletal muscle organ development	10/575	169/16266	0.0773914	0.75871	DCN/HDAC9/MEF2C/MYH14/RPS6KB1/FOXP2/STRA6/TSC22D3/LEMD2/CTNNB1	10
BP	GO:0090130	tissue migration	12/575	214/16266	0.0780142	0.75871	HDAC9/CLASP1/GATA3/CORO1C/GIPC1/NR4A1/MAP2K5/BCAS3/CLASP2/T/CCBE1/FGF16	12
BP	GO:0006493	protein O-linked glycosylation	7/575	105/16266	0.0785293	0.75871	ST3GAL6/FKTN/ST3GAL5/GALNT8/MUC17/MUC13/MUC1	7
BP	GO:0031102	neuron projection regeneration	4/575	46/16266	0.0786582	0.75871	TSPO/GFAP/CHL1/APOD	4
BP	GO:0048286	lung alveolus development	4/575	46/16266	0.0786582	0.75871	FGFR2/FOXP2/STRA6/TMTC3	4
BP	GO:0007160	cell-matrix adhesion	11/575	192/16266	0.0791581	0.75871	CD44/CLASP1/CORO1C/SGCE/CD36/FBLN5/BCAS3/EDA/CLASP2/CTNNB1/APOD	11
BP	GO:0002260	lymphocyte homeostasis	5/575	65/16266	0.0794922	0.75871	MEF2C/TNFAIP3/ZC3H8/TSC22D3/IKBKG	5
BP	GO:0006970	response to osmotic stress	5/575	65/16266	0.0794922	0.75871	FMO1/CAPN3/TSPO/NTS/TSC22D3	5
BP	GO:0007611	learning or memory	12/575	215/16266	0.080125	0.75871	MEF2C/KCNK2/RPS6KB1/EPM2A/PDE4D/SGK1/FOXP2/NTS/STRA6/PAK1/PRKAR1B/FZD9	12
BP	GO:0022600	digestive system process	6/575	85/16266	0.0802225	0.75871	NMU/SGK1/MOGAT2/MUC13/PAWR/SLC22A5	6
BP	GO:0009100	glycoprotein metabolic process	21/575	427/16266	0.0804048	0.75871	DCN/XYLT2/COL11A1/ST3GAL6/FKTN/GCNT2/ST3GAL5/B4GALT4/GALNT8/GBGT1/TCF7L2/SLC35A1/CTNNB1/B3GALNT1/MUC17/NDNF/MUC13/PAWR/ST8SIA3/MUC1/SPOCK3	21
BP	GO:0008277	regulation of G-protein coupled receptor protein signaling pathway	8/575	127/16266	0.081211	0.75871	GNB5/PDE4D/RGS4/GRK4/FNTB/FNTA/RGS6/CNGA1	8
BP	GO:0006623	protein targeting to vacuole	3/575	29/16266	0.081459	0.75871	VTI1B/SNX16/VPS13A	3
BP	GO:0060043	regulation of cardiac muscle cell proliferation	3/575	29/16266	0.081459	0.75871	FGFR2/MEF2C/KCNK2	3
BP	GO:1901031	regulation of response to reactive oxygen species	3/575	29/16266	0.081459	0.75871	CD36/FBLN5/GNB2L1	3
BP	GO:0009953	dorsal/ventral pattern formation	7/575	106/16266	0.0816655	0.75871	LHX3/FBXL15/DBX1/FOXN4/CTNNB1/AXIN2/TGIF1	7
BP	GO:0002224	toll-like receptor signaling pathway	9/575	149/16266	0.0822546	0.75871	MEF2A/MEF2C/TYRO3/MAPK10/TNFAIP3/CD36/RPS6KA3/TLR5/IKBKG	9
BP	GO:0030308	negative regulation of cell growth	9/575	149/16266	0.0822546	0.75871	SMARCA2/PPP2R1A/CYP27B1/MYL2/SMARCA4/PPARG/CDA/SLIT3/GNB2L1	9
BP	GO:0007045	cell-substrate adherens junction assembly	5/575	66/16266	0.0836434	0.75871	CLASP1/CORO1C/BCAS3/CLASP2/APOD	5
BP	GO:0048041	focal adhesion assembly	5/575	66/16266	0.0836434	0.75871	CLASP1/CORO1C/BCAS3/CLASP2/APOD	5
BP	GO:0072332	intrinsic apoptotic signaling pathway by p53 class mediator	5/575	66/16266	0.0836434	0.75871	CD44/CDIP1/ZNF385B/PGAP2/MUC1	5
BP	GO:1901888	regulation of cell junction assembly	5/575	66/16266	0.0836434	0.75871	CLASP1/CORO1C/BCAS3/CLASP2/APOD	5
BP	GO:0010833	telomere maintenance via telomere lengthening	4/575	47/16266	0.0836939	0.75871	ACD/RPA3/DNA2/CTNNB1	4
BP	GO:0042345	regulation of NF-kappaB import into nucleus	4/575	47/16266	0.0836939	0.75871	CYLD/EDA/SPHK1/LITAF	4
BP	GO:0042348	NF-kappaB import into nucleus	4/575	47/16266	0.0836939	0.75871	CYLD/EDA/SPHK1/LITAF	4
BP	GO:0055024	regulation of cardiac muscle tissue development	4/575	47/16266	0.0836939	0.75871	FGFR2/MEF2C/KCNK2/FGF3	4
BP	GO:0031214	biomineral tissue development	8/575	128/16266	0.0841005	0.75871	FGFR2/MEF2C/FBXL15/CYP27B1/HTN1/CLEC3B/AXIN2/MTSS1	8
BP	GO:0045926	negative regulation of growth	12/575	217/16266	0.0844541	0.75871	IDH3G/SMARCA2/KCNK2/PPP2R1A/CYP27B1/MYL2/SMARCA4/PPARG/CD36/CDA/SLIT3/GNB2L1	12
BP	GO:0060541	respiratory system development	12/575	217/16266	0.0844541	0.75871	FGFR2/EYA1/PLOD3/LHX3/PDE4D/DPPA4/FOXP2/STRA6/TMTC3/HYDIN/EDA/CTNNB1	12
BP	GO:0000076	DNA replication checkpoint	2/575	14/16266	0.0857618	0.75871	DNA2/RAD17	2
BP	GO:0007063	regulation of sister chromatid cohesion	2/575	14/16266	0.0857618	0.75871	CTNNB1/AXIN2	2
BP	GO:0010310	regulation of hydrogen peroxide metabolic process	2/575	14/16266	0.0857618	0.75871	MMP3/PRDX2	2
BP	GO:0010878	cholesterol storage	2/575	14/16266	0.0857618	0.75871	PPARG/CD36	2
BP	GO:0021781	glial cell fate commitment	2/575	14/16266	0.0857618	0.75871	SOX6/CTNNB1	2
BP	GO:0039531	regulation of viral-induced cytoplasmic pattern recognition receptor signaling pathway	2/575	14/16266	0.0857618	0.75871	ANKRD17/PUM1	2
BP	GO:0046459	short-chain fatty acid metabolic process	2/575	14/16266	0.0857618	0.75871	PCCB/MMAA	2
BP	GO:0051497	negative regulation of stress fiber assembly	2/575	14/16266	0.0857618	0.75871	CLASP1/CLASP2	2
BP	GO:0098659	inorganic cation import into cell	2/575	14/16266	0.0857618	0.75871	STEAP2/PAWR	2
BP	GO:0099587	inorganic ion import into cell	2/575	14/16266	0.0857618	0.75871	STEAP2/PAWR	2
BP	GO:1901070	guanosine-containing compound biosynthetic process	2/575	14/16266	0.0857618	0.75871	GMPS/NME9	2
BP	GO:1902165	regulation of intrinsic apoptotic signaling pathway in response to DNA damage by p53 class mediator	2/575	14/16266	0.0857618	0.75871	CD44/MUC1	2
BP	GO:1901361	organic cyclic compound catabolic process	23/575	480/16266	0.0868222	0.75871	RPS20/PDE4A/SULT2A1/PPP2R1A/GCK/RPL34/CYP27B1/PDE4D/AGXT2/SLIRP/RPS15A/RNASEH2B/DNA2/NEIL1/PARN/ALDH1L1/RPS3/SMG1/HPD/CDA/LRTOMT/RPL23A/GNB2L1	23
BP	GO:0001782	B cell homeostasis	3/575	30/16266	0.0882402	0.75871	MEF2C/TNFAIP3/IKBKG	3
BP	GO:0002042	cell migration involved in sprouting angiogenesis	3/575	30/16266	0.0882402	0.75871	HDAC9/NR4A1/MAP2K5	3
BP	GO:0009154	purine ribonucleotide catabolic process	3/575	30/16266	0.0882402	0.75871	PDE4A/PDE4D/GNB2L1	3
BP	GO:0046627	negative regulation of insulin receptor signaling pathway	3/575	30/16266	0.0882402	0.75871	TSC2/RPS6KB1/PTPRE	3
BP	GO:0090279	regulation of calcium ion import	3/575	30/16266	0.0882402	0.75871	CTNNB1/PAWR/MRLN	3
BP	GO:1902475	L-alpha-amino acid transmembrane transport	3/575	30/16266	0.0882402	0.75871	SLC1A2/SLC7A1/SLC25A22	3
BP	GO:2000146	negative regulation of cell motility	11/575	196/16266	0.0884461	0.75871	CLASP1/GATA3/CORO1C/ACVR1C/MAP2K5/RNF20/CLASP2/GCSAM/MAGI2/APOD/ADGRG1	11
BP	GO:2001021	negative regulation of response to DNA damage stimulus	4/575	48/16266	0.0888835	0.75871	CD44/PGAP2/RPS3/MUC1	4
BP	GO:2001239	regulation of extrinsic apoptotic signaling pathway in absence of ligand	4/575	48/16266	0.0888835	0.75871	EYA1/PPP2R1A/MAP2K5/PRDX2	4
BP	GO:0045216	cell-cell junction organization	12/575	219/16266	0.0889267	0.75871	CLASP1/CORO1C/INADL/KIFC3/BCAS3/TBCD/RHOC/CLDN14/CLASP2/CTNNB1/MTSS1/APOD	12
BP	GO:0006352	DNA-templated transcription, initiation	16/575	313/16266	0.0901457	0.75871	WWTR1/TSC2/NR3C1/TFDP2/LAMTOR2/NR5A2/NR4A1/PPARG/GLS2/COX6C/PRDX2/CTNNB1/ATF7IP/TGIF1/BRF1/TCF4	16
BP	GO:0044282	small molecule catabolic process	17/575	337/16266	0.0905151	0.75871	HAGH/ACAT1/LIPE/SULT2A1/GCK/CYP27B1/ENO2/EPM2A/AGXT2/PCCB/GLS2/HADH/SDSL/ALDH1L1/MMAA/HPD/DDAH2	17
BP	GO:0001708	cell fate specification	6/575	88/16266	0.0912417	0.75871	EYA1/LHX3/DBX1/SOX6/MYL2/CTNNB1	6
BP	GO:0001952	regulation of cell-matrix adhesion	6/575	88/16266	0.0912417	0.75871	CLASP1/CORO1C/CD36/BCAS3/CLASP2/APOD	6
BP	GO:0050868	negative regulation of T cell activation	6/575	88/16266	0.0912417	0.75871	CYLD/BTN2A2/ZC3H8/NFKBID/PRDX2/PAWR	6
BP	GO:0046942	carboxylic acid transport	15/575	290/16266	0.0914236	0.75871	RIMS1/FOLR3/SLC1A2/SLC16A10/GIPC1/PPARG/CD36/GLS2/SLC7A1/PAK1/GRM2/SLC25A22/SLC36A2/SLC22A5/REPIN1	15
BP	GO:0097193	intrinsic apoptotic signaling pathway	15/575	290/16266	0.0914236	0.75871	CD44/TNFRSF1A/CYLD/CDIP1/SOD2/MSH6/IVNS1ABP/SPOP/BCL2L2/ZNF385B/PGAP2/PARL/MUC1/GNB2L1/ERCC6	15
BP	GO:0034142	toll-like receptor 4 signaling pathway	7/575	109/16266	0.0915013	0.75871	MEF2A/MEF2C/MAPK10/TNFAIP3/CD36/RPS6KA3/IKBKG	7
BP	GO:0009112	nucleobase metabolic process	5/575	68/16266	0.0922815	0.75871	GMPR2/AGXT2/CDA/GMPS/ADSL	5
BP	GO:0048738	cardiac muscle tissue development	10/575	175/16266	0.0923794	0.75871	COL11A1/FGFR2/MEF2A/MEF2C/KCNK2/NOX4/SOX6/MYL2/FHOD3/FGF3	10
BP	GO:0010632	regulation of epithelial cell migration	9/575	153/16266	0.0932435	0.75871	HDAC9/CLASP1/GATA3/CORO1C/MAP2K5/BCAS3/CLASP2/CCBE1/FGF16	9
BP	GO:0045428	regulation of nitric oxide biosynthetic process	4/575	49/16266	0.0942242	0.75871	TSPO/AGXT2/TLR5/DDAH2	4
BP	GO:1901264	carbohydrate derivative transport	4/575	49/16266	0.0942242	0.75871	SLC35A3/SLC35A5/SLC35A1/SLC29A4	4
BP	GO:1903649	regulation of cytoplasmic transport	21/575	436/16266	0.0945362	0.75871	WWTR1/PPP1R12A/CYLD/SCFD1/CAPN3/PDE4D/CD36/GLS2/BARD1/ANK2/TCF7L2/EDA/AXIN2/NMUR1/PARL/RUVBL1/SPHK1/APOD/LITAF/GNB2L1/MRLN	21
BP	GO:0035051	cardiocyte differentiation	7/575	110/16266	0.0949213	0.75871	MEF2A/MEF2C/NOX4/SOX6/MYL2/FHOD3/T	7
BP	GO:0045580	regulation of T cell differentiation	7/575	110/16266	0.0949213	0.75871	CYLD/GATA3/IL36B/ZC3H8/ADAM8/NFKBID/PRDX2	7
BP	GO:0009261	ribonucleotide catabolic process	3/575	31/16266	0.0952497	0.75871	PDE4A/PDE4D/GNB2L1	3
BP	GO:0010165	response to X-ray	3/575	31/16266	0.0952497	0.75871	GATA3/XRRA1/ERCC6	3
BP	GO:0021799	cerebral cortex radially oriented cell migration	3/575	31/16266	0.0952497	0.75871	LRP8/CTNNB1/ADGRG1	3
BP	GO:0030201	heparan sulfate proteoglycan metabolic process	3/575	31/16266	0.0952497	0.75871	XYLT2/TCF7L2/CTNNB1	3
BP	GO:0032102	negative regulation of response to external stimulus	13/575	245/16266	0.0954453	0.75871	PHF23/TNFRSF1A/CLASP1/SCFD1/TYRO3/GATA3/TNFAIP3/PPARG/CLASP2/PRDX2/C1QTNF1/METRNL/APOD	13
BP	GO:0048872	homeostasis of number of cells	12/575	222/16266	0.0959051	0.75871	MEF2C/GATA3/SOX6/TNFAIP3/ILDR2/ZC3H8/TSC22D3/FANCC/NCSTN/PRDX2/SLC22A5/IKBKG	12
BP	GO:0055002	striated muscle cell development	8/575	132/16266	0.0962548	0.75871	HDAC9/MEF2A/CAPN3/MYL2/LDB3/FHOD3/TMTC3/UCHL1	8
BP	GO:0003085	negative regulation of systemic arterial blood pressure	2/575	15/16266	0.0967165	0.75871	SOD2/ADRA1D	2
BP	GO:0009070	serine family amino acid biosynthetic process	2/575	15/16266	0.0967165	0.75871	PHGDH/AGXT2	2
BP	GO:0014002	astrocyte development	2/575	15/16266	0.0967165	0.75871	GFAP/TSPAN2	2
BP	GO:0015695	organic cation transport	2/575	15/16266	0.0967165	0.75871	SLC47A1/SLC22A5	2
BP	GO:0032462	regulation of protein homooligomerization	2/575	15/16266	0.0967165	0.75871	PEX5/GNB2L1	2
BP	GO:0032495	response to muramyl dipeptide	2/575	15/16266	0.0967165	0.75871	ERBB2IP/TNFAIP3	2
BP	GO:0032634	interleukin-5 production	2/575	15/16266	0.0967165	0.75871	GATA3/PDE4D	2
BP	GO:0032674	regulation of interleukin-5 production	2/575	15/16266	0.0967165	0.75871	GATA3/PDE4D	2
BP	GO:0033197	response to vitamin E	2/575	15/16266	0.0967165	0.75871	PPARG/PAWR	2
BP	GO:0034616	response to laminar fluid shear stress	2/575	15/16266	0.0967165	0.75871	NCF2/MAP2K5	2
BP	GO:0038092	nodal signaling pathway	2/575	15/16266	0.0967165	0.75871	ACVR1C/TGIF1	2
BP	GO:0039529	RIG-I signaling pathway	2/575	15/16266	0.0967165	0.75871	ANKRD17/PUM1	2
BP	GO:0046033	AMP metabolic process	2/575	15/16266	0.0967165	0.75871	AK9/ADSL	2
BP	GO:0051044	positive regulation of membrane protein ectodomain proteolysis	2/575	15/16266	0.0967165	0.75871	SH3D19/ADAM8	2
BP	GO:0051150	regulation of smooth muscle cell differentiation	2/575	15/16266	0.0967165	0.75871	FGFR2/ANKRD17	2
BP	GO:0051923	sulfation	2/575	15/16266	0.0967165	0.75871	SULT2A1/SULT1A1	2
BP	GO:0060192	negative regulation of lipase activity	2/575	15/16266	0.0967165	0.75871	POR/ANGPTL4	2
BP	GO:0060442	branching involved in prostate gland morphogenesis	2/575	15/16266	0.0967165	0.75871	CD44/FGFR2	2
BP	GO:0060788	ectodermal placode formation	2/575	15/16266	0.0967165	0.75871	EDA/CTNNB1	2
BP	GO:0061323	cell proliferation involved in heart morphogenesis	2/575	15/16266	0.0967165	0.75871	EYA1/CTNNB1	2
BP	GO:0071696	ectodermal placode development	2/575	15/16266	0.0967165	0.75871	EDA/CTNNB1	2
BP	GO:0071697	ectodermal placode morphogenesis	2/575	15/16266	0.0967165	0.75871	EDA/CTNNB1	2
BP	GO:0071880	adenylate cyclase-activating adrenergic receptor signaling pathway	2/575	15/16266	0.0967165	0.75871	PDE4D/ADRA1D	2
BP	GO:1903055	positive regulation of extracellular matrix organization	2/575	15/16266	0.0967165	0.75871	CLASP1/CLASP2	2
BP	GO:2000136	regulation of cell proliferation involved in heart morphogenesis	2/575	15/16266	0.0967165	0.75871	EYA1/CTNNB1	2
BP	GO:0070997	neuron death	14/575	269/16266	0.0967365	0.75871	MEF2C/TYRO3/GATA3/SOD2/NR3C1/NCF2/CHL1/ADAM8/CTNNB1/NLRP5/NDNF/PAWR/GNB2L1/IKBKG	14
BP	GO:0015849	organic acid transport	15/575	293/16266	0.0975391	0.763469	RIMS1/FOLR3/SLC1A2/SLC16A10/GIPC1/PPARG/CD36/GLS2/SLC7A1/PAK1/GRM2/SLC25A22/SLC36A2/SLC22A5/REPIN1	15
BP	GO:0034138	toll-like receptor 3 signaling pathway	6/575	90/16266	0.0990203	0.769131	MEF2A/MEF2C/MAPK10/TNFAIP3/RPS6KA3/IKBKG	6
BP	GO:0050954	sensory perception of mechanical stimulus	9/575	155/16266	0.099045	0.769131	USH2A/COL11A1/FAM107B/EYA1/MYH14/ATP6V0A4/PAWR/TMIE/LRTOMT	9
BP	GO:0032387	negative regulation of intracellular transport	8/575	133/16266	0.0994416	0.769131	WWTR1/CYLD/CD36/BARD1/AXIN2/APOD/LITAF/MRLN	8
BP	GO:0006284	base-excision repair	4/575	50/16266	0.0997129	0.769131	RPA3/DNA2/NEIL1/ERCC6	4
BP	GO:0006367	transcription initiation from RNA polymerase II promoter	14/575	271/16266	0.101122	0.769131	WWTR1/TSC2/NR3C1/TFDP2/LAMTOR2/NR5A2/NR4A1/PPARG/GLS2/COX6C/PRDX2/ATF7IP/TGIF1/TCF4	14
BP	GO:0045995	regulation of embryonic development	7/575	112/16266	0.101971	0.769131	CLASP1/GATA3/MAP2K5/CLASP2/CTNNB1/TGIF1/GNB2L1	7
BP	GO:0060191	regulation of lipase activity	7/575	112/16266	0.101971	0.769131	FGFR2/POR/PLCB2/RHOC/ANGPTL4/NMUR1/PRKAR1B	7
BP	GO:0000077	DNA damage checkpoint	9/575	156/16266	0.102022	0.769131	PSME3/RNASEH2B/INTS7/CHEK1/ORAOV1/RAD17/CRADD/RHNO1/MUC1	9
BP	GO:0050890	cognition	13/575	248/16266	0.102345	0.769131	MEF2C/KCNK2/RPS6KB1/EPM2A/PDE4D/SGK1/FOXP2/NTS/CHL1/STRA6/PAK1/PRKAR1B/FZD9	13
BP	GO:0002053	positive regulation of mesenchymal cell proliferation	3/575	32/16266	0.102479	0.769131	FGFR2/FOXP2/CTNNB1	3
BP	GO:0032459	regulation of protein oligomerization	3/575	32/16266	0.102479	0.769131	PEX5/MMP3/GNB2L1	3
BP	GO:0044058	regulation of digestive system process	3/575	32/16266	0.102479	0.769131	SGK1/PAWR/SLC22A5	3
BP	GO:0048665	neuron fate specification	3/575	32/16266	0.102479	0.769131	EYA1/LHX3/DBX1	3
BP	GO:1900077	negative regulation of cellular response to insulin stimulus	3/575	32/16266	0.102479	0.769131	TSC2/RPS6KB1/PTPRE	3
BP	GO:0031348	negative regulation of defense response	8/575	134/16266	0.102687	0.769131	TNFRSF1A/TYRO3/GATA3/TNFAIP3/PPARG/SUSD4/METRNL/APOD	8
BP	GO:0006939	smooth muscle contraction	6/575	91/16266	0.103037	0.769131	NMU/PDE4D/NMUR1/ADRA1D/SPHK1/PAWR	6
BP	GO:0055007	cardiac muscle cell differentiation	6/575	91/16266	0.103037	0.769131	MEF2A/MEF2C/NOX4/SOX6/MYL2/FHOD3	6
BP	GO:0034329	cell junction assembly	12/575	225/16266	0.103207	0.769131	CLASP1/CORO1C/INADL/BCAS3/TBCD/DST/RHOC/CLDN14/CLASP2/CTNNB1/PLEC/APOD	12
BP	GO:0007163	establishment or maintenance of cell polarity	9/575	157/16266	0.10505	0.769131	MAP4/CLASP1/EYA1/GATA3/ERBB2IP/BCAS3/DST/CLASP2/GNB2L1	9
BP	GO:1901215	negative regulation of neuron death	9/575	157/16266	0.10505	0.769131	MEF2C/TYRO3/SOD2/CHL1/ADAM8/CTNNB1/NDNF/GNB2L1/IKBKG	9
BP	GO:2001236	regulation of extrinsic apoptotic signaling pathway	9/575	157/16266	0.10505	0.769131	CYLD/EYA1/PPP2R1A/RPS6KB1/TNFAIP3/PSME3/MAP2K5/TCF7L2/PRDX2	9
BP	GO:0006584	catecholamine metabolic process	4/575	51/16266	0.105346	0.769131	SNCAIP/GATA3/LRTOMT/SULT1A1	4
BP	GO:0009712	catechol-containing compound metabolic process	4/575	51/16266	0.105346	0.769131	SNCAIP/GATA3/LRTOMT/SULT1A1	4
BP	GO:0045844	positive regulation of striated muscle tissue development	4/575	51/16266	0.105346	0.769131	FGFR2/MEF2C/RPS6KB1/CTNNB1	4
BP	GO:0048636	positive regulation of muscle organ development	4/575	51/16266	0.105346	0.769131	FGFR2/MEF2C/RPS6KB1/CTNNB1	4
BP	GO:0050810	regulation of steroid biosynthetic process	4/575	51/16266	0.105346	0.769131	TSPO/CYP27B1/NR3C1/POR	4
BP	GO:0070231	T cell apoptotic process	4/575	51/16266	0.105346	0.769131	ZC3H8/ADAM8/TSC22D3/NFKBID	4
BP	GO:0009063	cellular amino acid catabolic process	7/575	113/16266	0.1056	0.769131	ACAT1/AGXT2/GLS2/SDSL/ALDH1L1/HPD/DDAH2	7
BP	GO:0051017	actin filament bundle assembly	7/575	113/16266	0.1056	0.769131	CLASP1/NOX4/ASAP3/PAK1/CLASP2/MTSS1/PAWR	7
BP	GO:0035270	endocrine system development	8/575	135/16266	0.105991	0.769131	TSPO/GCK/LHX3/GATA3/NR3C1/NR5A2/PAX1/STRA6	8
BP	GO:0070227	lymphocyte apoptotic process	5/575	71/16266	0.106059	0.769131	TRAF3IP2/ZC3H8/ADAM8/TSC22D3/NFKBID	5
BP	GO:0031589	cell-substrate adhesion	15/575	297/16266	0.10608	0.769131	CD44/CLASP1/TYRO3/CORO1C/GCNT2/SGCE/CD36/FBLN5/BCAS3/TBCD/EDA/CLASP2/CTNNB1/NDNF/APOD	15
BP	GO:0001696	gastric acid secretion	2/575	16/16266	0.10804	0.769131	NMU/SGK1	2
BP	GO:0002467	germinal center formation	2/575	16/16266	0.10804	0.769131	MEF2C/TNFAIP3	2
BP	GO:0003417	growth plate cartilage development	2/575	16/16266	0.10804	0.769131	COMP/POR	2
BP	GO:0006544	glycine metabolic process	2/575	16/16266	0.10804	0.769131	PHGDH/AGXT2	2
BP	GO:0006590	thyroid hormone generation	2/575	16/16266	0.10804	0.769131	GATA3/DIO2	2
BP	GO:0030277	maintenance of gastrointestinal epithelium	2/575	16/16266	0.10804	0.769131	MUC13/SLC22A5	2
BP	GO:0030322	stabilization of membrane potential	2/575	16/16266	0.10804	0.769131	KCNK2/KCNK7	2
BP	GO:0030540	female genitalia development	2/575	16/16266	0.10804	0.769131	TYRO3/STRA6	2
BP	GO:0032232	negative regulation of actin filament bundle assembly	2/575	16/16266	0.10804	0.769131	CLASP1/CLASP2	2
BP	GO:0035313	wound healing, spreading of epidermal cells	2/575	16/16266	0.10804	0.769131	CLASP1/CLASP2	2
BP	GO:0042510	regulation of tyrosine phosphorylation of Stat1 protein	2/575	16/16266	0.10804	0.769131	TNFRSF1A/TNFRSF18	2
BP	GO:0042559	pteridine-containing compound biosynthetic process	2/575	16/16266	0.10804	0.769131	PTS/MTHFD2L	2
BP	GO:0045026	plasma membrane fusion	2/575	16/16266	0.10804	0.769131	IZUMO1/SERPINA5	2
BP	GO:0071380	cellular response to prostaglandin E stimulus	2/575	16/16266	0.10804	0.769131	PPARG/P2RY6	2
BP	GO:0072643	interferon-gamma secretion	2/575	16/16266	0.10804	0.769131	BTN3A1/GATA3	2
BP	GO:0090049	regulation of cell migration involved in sprouting angiogenesis	2/575	16/16266	0.10804	0.769131	HDAC9/MAP2K5	2
BP	GO:0007519	skeletal muscle tissue development	9/575	158/16266	0.108128	0.769131	DCN/HDAC9/MEF2C/MYH14/RPS6KB1/FOXP2/TSC22D3/LEMD2/CTNNB1	9
BP	GO:0050866	negative regulation of cell activation	9/575	158/16266	0.108128	0.769131	CYLD/TYRO3/TNFAIP3/BTN2A2/ZC3H8/NFKBID/PRDX2/C1QTNF1/PAWR	9
BP	GO:0046822	regulation of nucleocytoplasmic transport	11/575	204/16266	0.108938	0.769228	WWTR1/PPP1R12A/CYLD/CD36/BARD1/TCF7L2/EDA/AXIN2/SPHK1/APOD/LITAF	11
BP	GO:0006024	glycosaminoglycan biosynthetic process	7/575	114/16266	0.109298	0.769228	DCN/XYLT2/ST3GAL6/OGN/GCNT2/ST3GAL5/B4GALT4	7
BP	GO:0001764	neuron migration	8/575	136/16266	0.109354	0.769228	MEF2C/GATA3/CHL1/GFRA3/GPM6A/CTNNB1/NDNF/ADGRG1	8
BP	GO:0003401	axis elongation	3/575	33/16266	0.109918	0.769228	FGFR2/TMTC3/MAGI2	3
BP	GO:0006739	NADP metabolic process	3/575	33/16266	0.109918	0.769228	FMO1/GCK/DCXR	3
BP	GO:0048730	epidermis morphogenesis	3/575	33/16266	0.109918	0.769228	FGFR2/PLOD3/CTNNB1	3
BP	GO:0070296	sarcoplasmic reticulum calcium ion transport	3/575	33/16266	0.109918	0.769228	PDE4D/ANK2/MRLN	3
BP	GO:0072529	pyrimidine-containing compound catabolic process	3/575	33/16266	0.109918	0.769228	AGXT2/NEIL1/CDA	3
BP	GO:1902229	regulation of intrinsic apoptotic signaling pathway in response to DNA damage	3/575	33/16266	0.109918	0.769228	CD44/PGAP2/MUC1	3
BP	GO:0010332	response to gamma radiation	4/575	52/16266	0.111121	0.770754	NOX4/GATA3/DDIAS/ERCC6	4
BP	GO:0031110	regulation of microtubule polymerization or depolymerization	4/575	52/16266	0.111121	0.770754	CLASP1/STMN2/TBCD/CLASP2	4
BP	GO:1901863	positive regulation of muscle tissue development	4/575	52/16266	0.111121	0.770754	FGFR2/MEF2C/RPS6KB1/CTNNB1	4
BP	GO:0034440	lipid oxidation	6/575	93/16266	0.111322	0.770754	PCCB/POR/PPARG/HADH/MMAA/APOD	6
BP	GO:1901606	alpha-amino acid catabolic process	6/575	93/16266	0.111322	0.770754	AGXT2/GLS2/SDSL/ALDH1L1/HPD/DDAH2	6
BP	GO:1903038	negative regulation of leukocyte cell-cell adhesion	6/575	93/16266	0.111322	0.770754	CYLD/BTN2A2/ZC3H8/NFKBID/PRDX2/PAWR	6
BP	GO:0006023	aminoglycan biosynthetic process	7/575	115/16266	0.113064	0.778898	DCN/XYLT2/ST3GAL6/OGN/GCNT2/ST3GAL5/B4GALT4	7
BP	GO:0070507	regulation of microtubule cytoskeleton organization	7/575	115/16266	0.113064	0.778898	CLASP1/CYLD/STMN2/TBCD/CHEK1/CLASP2/CTNNB1	7
BP	GO:0097191	extrinsic apoptotic signaling pathway	12/575	229/16266	0.113444	0.778898	TNFRSF1A/CYLD/EYA1/PPP2R1A/RPS6KB1/TNFAIP3/BCL2L2/PSME3/MAP2K5/TCF7L2/PRDX2/CRADD	12
BP	GO:0006469	negative regulation of protein kinase activity	11/575	206/16266	0.114457	0.778898	WWTR1/WNK1/TSC2/PPP2R1A/CORO1C/RGS4/TNFAIP3/GMFG/UCHL1/PRKAR1B/GNB2L1	11
BP	GO:0010631	epithelial cell migration	11/575	206/16266	0.114457	0.778898	HDAC9/CLASP1/GATA3/CORO1C/GIPC1/NR4A1/MAP2K5/BCAS3/CLASP2/CCBE1/FGF16	11
BP	GO:0009101	glycoprotein biosynthetic process	18/575	374/16266	0.115499	0.778898	DCN/XYLT2/ST3GAL6/FKTN/GCNT2/ST3GAL5/B4GALT4/GALNT8/GBGT1/TCF7L2/SLC35A1/CTNNB1/B3GALNT1/MUC17/MUC13/PAWR/ST8SIA3/MUC1	18
BP	GO:0034162	toll-like receptor 9 signaling pathway	5/575	73/16266	0.115773	0.778898	MEF2A/MEF2C/MAPK10/RPS6KA3/IKBKG	5
BP	GO:0046849	bone remodeling	5/575	73/16266	0.115773	0.778898	NOX4/TNFAIP3/ADAM8/TPP1/CTNNB1	5
BP	GO:1904019	epithelial cell apoptotic process	5/575	73/16266	0.115773	0.778898	GATA3/TNFAIP3/SPOP/TCF7L2/ANGPTL4	5
BP	GO:0014812	muscle cell migration	4/575	53/16266	0.117034	0.778898	NOX4/RPS6KB1/PDE4D/P2RY6	4
BP	GO:0043488	regulation of mRNA stability	4/575	53/16266	0.117034	0.778898	CIRBP/PUM1/AXIN2/BRF1	4
BP	GO:0048747	muscle fiber development	4/575	53/16266	0.117034	0.778898	HDAC9/MYL2/TMTC3/UCHL1	4
BP	GO:0003156	regulation of organ formation	3/575	34/16266	0.117558	0.778898	EYA1/CTNNB1/FGF3	3
BP	GO:0042558	pteridine-containing compound metabolic process	3/575	34/16266	0.117558	0.778898	ALDH1L1/PTS/MTHFD2L	3
BP	GO:1901099	negative regulation of signal transduction in absence of ligand	3/575	34/16266	0.117558	0.778898	EYA1/MAP2K5/PRDX2	3
BP	GO:2001240	negative regulation of extrinsic apoptotic signaling pathway in absence of ligand	3/575	34/16266	0.117558	0.778898	EYA1/MAP2K5/PRDX2	3
BP	GO:0019439	aromatic compound catabolic process	21/575	449/16266	0.117629	0.778898	RPS20/PDE4A/PPP2R1A/GCK/RPL34/PDE4D/AGXT2/SLIRP/RPS15A/RNASEH2B/DNA2/NEIL1/PARN/ALDH1L1/RPS3/SMG1/HPD/CDA/LRTOMT/RPL23A/GNB2L1	21
BP	GO:0006338	chromatin remodeling	9/575	161/16266	0.117664	0.778898	ARID1B/SMARCE1/SMARCA2/SMARCA4/CHD1L/CHEK1/CTNNB1/STRA13/RUVBL1	9
BP	GO:0048762	mesenchymal cell differentiation	9/575	161/16266	0.117664	0.778898	WWTR1/FGFR2/CLASP1/MEF2C/CORO1C/GCNT2/CLASP2/CTNNB1/AXIN2	9
BP	GO:0001976	neurological system process involved in regulation of systemic arterial blood pressure	2/575	17/16266	0.119692	0.778898	SOD2/ADRA1D	2
BP	GO:0006337	nucleosome disassembly	2/575	17/16266	0.119692	0.778898	SMARCE1/SMARCA4	2
BP	GO:0006577	amino-acid betaine metabolic process	2/575	17/16266	0.119692	0.778898	POR/SLC22A5	2
BP	GO:0010738	regulation of protein kinase A signaling	2/575	17/16266	0.119692	0.778898	PDE4A/PDE4D	2
BP	GO:0031112	positive regulation of microtubule polymerization or depolymerization	2/575	17/16266	0.119692	0.778898	CLASP1/STMN2	2
BP	GO:0032703	negative regulation of interleukin-2 production	2/575	17/16266	0.119692	0.778898	GATA3/TNFAIP3	2
BP	GO:0032986	protein-DNA complex disassembly	2/575	17/16266	0.119692	0.778898	SMARCE1/SMARCA4	2
BP	GO:0042693	muscle cell fate commitment	2/575	17/16266	0.119692	0.778898	MEF2C/MYL2	2
BP	GO:0043092	L-amino acid import	2/575	17/16266	0.119692	0.778898	SLC1A2/SLC7A1	2
BP	GO:0051900	regulation of mitochondrial depolarization	2/575	17/16266	0.119692	0.778898	TSPO/GNB2L1	2
BP	GO:0060065	uterus development	2/575	17/16266	0.119692	0.778898	GATA3/STRA6	2
BP	GO:0060251	regulation of glial cell proliferation	2/575	17/16266	0.119692	0.778898	TSPO/GFAP	2
BP	GO:0060572	morphogenesis of an epithelial bud	2/575	17/16266	0.119692	0.778898	FGFR2/CTNNB1	2
BP	GO:0070875	positive regulation of glycogen metabolic process	2/575	17/16266	0.119692	0.778898	GCK/PHKG2	2
BP	GO:0071285	cellular response to lithium ion	2/575	17/16266	0.119692	0.778898	PPARG/NTS	2
BP	GO:1902254	negative regulation of intrinsic apoptotic signaling pathway by p53 class mediator	2/575	17/16266	0.119692	0.778898	CD44/MUC1	2
BP	GO:1903779	regulation of cardiac conduction	2/575	17/16266	0.119692	0.778898	PDE4D/ANK2	2
BP	GO:0046620	regulation of organ growth	5/575	74/16266	0.120783	0.780882	FGFR2/MEF2C/KCNK2/POR/RAG2	5
BP	GO:0016579	protein deubiquitination	7/575	117/16266	0.120798	0.780882	CYLD/USP14/USP34/TNFAIP3/USP6/USP30/UCHL1	7
BP	GO:0051494	negative regulation of cytoskeleton organization	7/575	117/16266	0.120798	0.780882	CLASP1/STMN2/GMFG/FHOD3/TBCD/TWF1/CLASP2	7
BP	GO:0061572	actin filament bundle organization	7/575	117/16266	0.120798	0.780882	CLASP1/NOX4/ASAP3/PAK1/CLASP2/MTSS1/PAWR	7
BP	GO:0071560	cellular response to transforming growth factor beta stimulus	12/575	232/16266	0.121494	0.782653	WWTR1/MEF2C/NOX4/SOX6/GCNT2/TFDP2/GIPC1/COL4A2/PRDM16/CLEC3B/FNTA/TGIF1	12
BP	GO:0051271	negative regulation of cellular component movement	11/575	209/16266	0.12303	0.782653	CLASP1/GATA3/CORO1C/ACVR1C/MAP2K5/RNF20/CLASP2/GCSAM/MAGI2/APOD/ADGRG1	11
BP	GO:0090132	epithelium migration	11/575	209/16266	0.12303	0.782653	HDAC9/CLASP1/GATA3/CORO1C/GIPC1/NR4A1/MAP2K5/BCAS3/CLASP2/CCBE1/FGF16	11
BP	GO:0001885	endothelial cell development	4/575	54/16266	0.12308	0.782653	TNFRSF1A/PLOD3/PDE4D/CTNNB1	4
BP	GO:0003382	epithelial cell morphogenesis	4/575	54/16266	0.12308	0.782653	PLOD3/GATA3/PALLD/CTNNB1	4
BP	GO:0006611	protein export from nucleus	4/575	54/16266	0.12308	0.782653	BARD1/TCF7L2/XPO6/CCHCR1	4
BP	GO:0035872	nucleotide-binding domain, leucine rich repeat containing receptor signaling pathway	4/575	54/16266	0.12308	0.782653	CYLD/ERBB2IP/TNFAIP3/IKBKG	4
BP	GO:0043124	negative regulation of I-kappaB kinase/NF-kappaB signaling	4/575	54/16266	0.12308	0.782653	CYLD/TNFAIP3/NFKBID/LITAF	4
BP	GO:0060350	endochondral bone morphogenesis	4/575	54/16266	0.12308	0.782653	MEF2C/COMP/POR/AXIN2	4
BP	GO:0070228	regulation of lymphocyte apoptotic process	4/575	54/16266	0.12308	0.782653	ZC3H8/ADAM8/TSC22D3/NFKBID	4
BP	GO:0030336	negative regulation of cell migration	10/575	186/16266	0.124033	0.787431	CLASP1/CORO1C/ACVR1C/MAP2K5/RNF20/CLASP2/GCSAM/MAGI2/APOD/ADGRG1	10
BP	GO:0031146	SCF-dependent proteasomal ubiquitin-dependent protein catabolic process	3/575	35/16266	0.12539	0.789413	WWTR1/FBXL19/FBXL15	3
BP	GO:0033003	regulation of mast cell activation	3/575	35/16266	0.12539	0.789413	C12orf4/STXBP2/PTPRE	3
BP	GO:0045843	negative regulation of striated muscle tissue development	3/575	35/16266	0.12539	0.789413	KCNK2/TSC22D3/FGF3	3
BP	GO:0055021	regulation of cardiac muscle tissue growth	3/575	35/16266	0.12539	0.789413	FGFR2/MEF2C/KCNK2	3
BP	GO:0098900	regulation of action potential	3/575	35/16266	0.12539	0.789413	SUMO1/ANK2/PAWR	3
BP	GO:0043149	stress fiber assembly	5/575	75/16266	0.125894	0.789413	CLASP1/NOX4/ASAP3/PAK1/CLASP2	5
BP	GO:0072676	lymphocyte migration	5/575	75/16266	0.125894	0.789413	GATA3/ADAM8/GCSAM/APOD/CKLF	5
BP	GO:0051648	vesicle localization	11/575	210/16266	0.125966	0.789413	FGFR2/CLASP1/RIMS1/ARFGAP1/SYTL2/CACFD1/CLASP2/CTNNB1/VPS33B/MAGI2/IKBKG	11
BP	GO:0038179	neurotrophin signaling pathway	19/575	404/16266	0.126743	0.791848	FGFR2/MEF2A/MEF2C/TSC2/LAMTOR2/MAPKAP1/NR4A1/ARHGEF9/PSME3/MAP2K5/NCSTN/ARHGEF3/RPS6KA3/FGF3/MAGI2/PRKAR1B/FGF16/ARHGEF12/SLC9A6	19
BP	GO:0002695	negative regulation of leukocyte activation	8/575	141/16266	0.127025	0.791848	CYLD/TYRO3/TNFAIP3/BTN2A2/ZC3H8/NFKBID/PRDX2/PAWR	8
BP	GO:0030324	lung development	10/575	187/16266	0.127174	0.791848	FGFR2/EYA1/PLOD3/LHX3/PDE4D/DPPA4/FOXP2/STRA6/TMTC3/CTNNB1	10
BP	GO:0071216	cellular response to biotic stimulus	9/575	164/16266	0.127643	0.791848	MEF2C/TSPO/PDE4D/TNFAIP3/CD36/PRDX2/TLR5/LITAF/LTC4S	9
BP	GO:0016055	Wnt signaling pathway	19/575	405/16266	0.128862	0.791848	WWTR1/CD44/FGFR2/CYLD/TSC2/PPP2R1A/GATA3/USP34/WLS/SMARCA4/PSME3/TCF7L2/EDA/T/CTNNB1/AXIN2/MAGI2/FZD9/GNB2L1	19
BP	GO:0045598	regulation of fat cell differentiation	6/575	97/16266	0.12887	0.791848	WWTR1/GATA3/PPARG/PRDM16/FAM57B/METRNL	6
BP	GO:0051297	centrosome organization	6/575	97/16266	0.12887	0.791848	PPP1R12A/HAUS4/CCDC18/TUBGCP4/CHEK1/CTNNB1	6
BP	GO:0032835	glomerulus development	4/575	55/16266	0.129257	0.791848	WWTR1/MEF2C/MTSS1/MAGI2	4
BP	GO:0033619	membrane protein proteolysis	4/575	55/16266	0.129257	0.791848	SH3D19/ADAM8/NCSTN/PARL	4
BP	GO:0048146	positive regulation of fibroblast proliferation	4/575	55/16266	0.129257	0.791848	FNTB/RNASEH2B/SPHK1/TGIF1	4
BP	GO:0071559	response to transforming growth factor beta	12/575	235/16266	0.12986	0.791848	WWTR1/MEF2C/NOX4/SOX6/GCNT2/TFDP2/GIPC1/COL4A2/PRDM16/CLEC3B/FNTA/TGIF1	12
BP	GO:0043523	regulation of neuron apoptotic process	10/575	188/16266	0.130358	0.791848	MEF2C/TYRO3/GATA3/SOD2/NR3C1/NCF2/CHL1/ADAM8/NDNF/PAWR	10
BP	GO:0007605	sensory perception of sound	8/575	142/16266	0.130728	0.791848	USH2A/COL11A1/FAM107B/EYA1/MYH14/ATP6V0A4/TMIE/LRTOMT	8
BP	GO:0032886	regulation of microtubule-based process	8/575	142/16266	0.130728	0.791848	CLASP1/CYLD/STMN2/TBCD/CHEK1/MEMO1/CLASP2/CTNNB1	8
BP	GO:0043542	endothelial cell migration	8/575	142/16266	0.130728	0.791848	HDAC9/GATA3/GIPC1/NR4A1/MAP2K5/BCAS3/CCBE1/FGF16	8
BP	GO:0035666	TRIF-dependent toll-like receptor signaling pathway	5/575	76/16266	0.131102	0.791848	MEF2A/MEF2C/MAPK10/RPS6KA3/IKBKG	5
BP	GO:0002691	regulation of cellular extravasation	2/575	18/16266	0.131636	0.791848	ADAM8/PAWR	2
BP	GO:0006895	Golgi to endosome transport	2/575	18/16266	0.131636	0.791848	VPS13A/CORO7	2
BP	GO:0016242	negative regulation of macroautophagy	2/575	18/16266	0.131636	0.791848	PHF23/SCFD1	2
BP	GO:0032332	positive regulation of chondrocyte differentiation	2/575	18/16266	0.131636	0.791848	SOX6/POR	2
BP	GO:0036342	post-anal tail morphogenesis	2/575	18/16266	0.131636	0.791848	T/FGF3	2
BP	GO:0050427	3'-phosphoadenosine 5'-phosphosulfate metabolic process	2/575	18/16266	0.131636	0.791848	SULT2A1/SULT1A1	2
BP	GO:0055026	negative regulation of cardiac muscle tissue development	2/575	18/16266	0.131636	0.791848	KCNK2/FGF3	2
BP	GO:0060037	pharyngeal system development	2/575	18/16266	0.131636	0.791848	EYA1/GATA3	2
BP	GO:0071371	cellular response to gonadotropin stimulus	2/575	18/16266	0.131636	0.791848	POR/PAWR	2
BP	GO:1902116	negative regulation of organelle assembly	2/575	18/16266	0.131636	0.791848	PHF23/SCFD1	2
BP	GO:0007568	aging	13/575	260/16266	0.132862	0.792992	DCN/NOX4/TSPO/RPS6KB1/SLC1A2/SOD2/PDE4D/NEK4/MSH6/NCF2/CHEK1/APOD/LITAF	13
BP	GO:0061041	regulation of wound healing	7/575	120/16266	0.132894	0.792992	CLASP1/CAPN3/TNFAIP3/CD36/CLASP2/PRDX2/C1QTNF1	7
BP	GO:0006890	retrograde vesicle-mediated transport, Golgi to ER	3/575	36/16266	0.133403	0.792992	SCFD1/ARFGAP1/COG4	3
BP	GO:0007019	microtubule depolymerization	3/575	36/16266	0.133403	0.792992	CLASP1/STMN2/CLASP2	3
BP	GO:0043388	positive regulation of DNA binding	3/575	36/16266	0.133403	0.792992	ACD/GATA3/TRIM6	3
BP	GO:0061028	establishment of endothelial barrier	3/575	36/16266	0.133403	0.792992	TNFRSF1A/PDE4D/CTNNB1	3
BP	GO:0009791	post-embryonic development	6/575	98/16266	0.133454	0.792992	FGFR2/GATA3/SOX6/MYL2/FOXP2/TMTC3	6
BP	GO:0010827	regulation of glucose transport	6/575	98/16266	0.133454	0.792992	GCK/RPS6KB1/SLC1A2/NUP85/ASPSCR1/REPIN1	6
BP	GO:0015758	glucose transport	8/575	143/16266	0.134486	0.797011	TSC2/GCK/RPS6KB1/SLC2A9/SLC1A2/NUP85/ASPSCR1/REPIN1	8
BP	GO:0010810	regulation of cell-substrate adhesion	9/575	166/16266	0.134539	0.797011	CLASP1/CORO1C/GCNT2/CD36/BCAS3/TBCD/CLASP2/NDNF/APOD	9
BP	GO:0006940	regulation of smooth muscle contraction	4/575	56/16266	0.13556	0.798683	NMU/ADRA1D/SPHK1/PAWR	4
BP	GO:0032508	DNA duplex unwinding	4/575	56/16266	0.13556	0.798683	RECQL5/CHD1L/DNA2/RUVBL1	4
BP	GO:1900076	regulation of cellular response to insulin stimulus	4/575	56/16266	0.13556	0.798683	TSC2/RPS6KB1/PTPRE/REPIN1	4
BP	GO:2000027	regulation of organ morphogenesis	9/575	167/16266	0.138058	0.798683	FGFR2/EYA1/GATA3/TNFAIP3/POR/FOXP2/CTNNB1/FGF3/MAGI2	9
BP	GO:0003007	heart morphogenesis	11/575	214/16266	0.13809	0.798683	COL11A1/FGFR2/MEF2C/EYA1/GATA3/MYL2/FOXN4/LEMD2/T/CTNNB1/AXIN2	11
BP	GO:0071887	leukocyte apoptotic process	6/575	99/16266	0.138114	0.798683	TRAF3IP2/MEF2C/ZC3H8/ADAM8/TSC22D3/NFKBID	6
BP	GO:0051656	establishment of organelle localization	15/575	311/16266	0.139424	0.798683	MAP4/FGFR2/CLASP1/KIF22/RIMS1/ARFGAP1/EYA1/SYNE1/SYTL2/CACFD1/CLASP2/CTNNB1/CHMP6/DYNC1H1/IKBKG	15
BP	GO:0030323	respiratory tube development	10/575	191/16266	0.140162	0.798683	FGFR2/EYA1/PLOD3/LHX3/PDE4D/DPPA4/FOXP2/STRA6/TMTC3/CTNNB1	10
BP	GO:0031103	axon regeneration	3/575	37/16266	0.141589	0.798683	TSPO/CHL1/APOD	3
BP	GO:0045429	positive regulation of nitric oxide biosynthetic process	3/575	37/16266	0.141589	0.798683	AGXT2/TLR5/DDAH2	3
BP	GO:0045599	negative regulation of fat cell differentiation	3/575	37/16266	0.141589	0.798683	WWTR1/GATA3/FAM57B	3
BP	GO:0046622	positive regulation of organ growth	3/575	37/16266	0.141589	0.798683	FGFR2/MEF2C/RAG2	3
BP	GO:0048635	negative regulation of muscle organ development	3/575	37/16266	0.141589	0.798683	KCNK2/TSC22D3/FGF3	3
BP	GO:0050732	negative regulation of peptidyl-tyrosine phosphorylation	3/575	37/16266	0.141589	0.798683	PPP2R1A/SEMA4D/GNB2L1	3
BP	GO:0070206	protein trimerization	3/575	37/16266	0.141589	0.798683	MGST1/TRIM6/C1QTNF1	3
BP	GO:1901068	guanosine-containing compound metabolic process	3/575	37/16266	0.141589	0.798683	GMPR2/GMPS/NME9	3
BP	GO:1901862	negative regulation of muscle tissue development	3/575	37/16266	0.141589	0.798683	KCNK2/TSC22D3/FGF3	3
BP	GO:1904407	positive regulation of nitric oxide metabolic process	3/575	37/16266	0.141589	0.798683	AGXT2/TLR5/DDAH2	3
BP	GO:2000401	regulation of lymphocyte migration	3/575	37/16266	0.141589	0.798683	ADAM8/GCSAM/APOD	3
BP	GO:0001776	leukocyte homeostasis	5/575	78/16266	0.141803	0.798683	MEF2C/TNFAIP3/ZC3H8/TSC22D3/IKBKG	5
BP	GO:2000106	regulation of leukocyte apoptotic process	5/575	78/16266	0.141803	0.798683	MEF2C/ZC3H8/ADAM8/TSC22D3/NFKBID	5
BP	GO:0002040	sprouting angiogenesis	4/575	57/16266	0.141985	0.798683	HDAC9/NR4A1/MAP2K5/CCBE1	4
BP	GO:0030204	chondroitin sulfate metabolic process	4/575	57/16266	0.141985	0.798683	DCN/XYLT2/NDNF/SPOCK3	4
BP	GO:0032623	interleukin-2 production	4/575	57/16266	0.141985	0.798683	GATA3/PDE4D/TNFAIP3/PAWR	4
BP	GO:0051588	regulation of neurotransmitter transport	4/575	57/16266	0.141985	0.798683	SNCAIP/RIMS1/MEF2C/GFAP	4
BP	GO:0008645	hexose transport	8/575	145/16266	0.142165	0.798683	TSC2/GCK/RPS6KB1/SLC2A9/SLC1A2/NUP85/ASPSCR1/REPIN1	8
BP	GO:0035148	tube formation	8/575	145/16266	0.142165	0.798683	TSC2/GATA3/BCAS3/EDA/T/CTNNB1/SEMA4C/TGIF1	8
BP	GO:0002683	negative regulation of immune system process	17/575	362/16266	0.143772	0.798683	CYLD/TYRO3/ERBB2IP/TNFAIP3/BTN2A2/PPARG/PRDM16/SUSD4/ZC3H8/TSC22D3/NFKBID/PRDX2/CTNNB1/GCSAM/PAWR/APOD/N4BP2L2	17
BP	GO:0009950	dorsal/ventral axis specification	2/575	19/16266	0.143837	0.798683	CTNNB1/AXIN2	2
BP	GO:0031498	chromatin disassembly	2/575	19/16266	0.143837	0.798683	SMARCE1/SMARCA4	2
BP	GO:0033189	response to vitamin A	2/575	19/16266	0.143837	0.798683	PPARG/LTC4S	2
BP	GO:0034035	purine ribonucleoside bisphosphate metabolic process	2/575	19/16266	0.143837	0.798683	SULT2A1/SULT1A1	2
BP	GO:0042508	tyrosine phosphorylation of Stat1 protein	2/575	19/16266	0.143837	0.798683	TNFRSF1A/TNFRSF18	2
BP	GO:0042762	regulation of sulfur metabolic process	2/575	19/16266	0.143837	0.798683	TCF7L2/CTNNB1	2
BP	GO:0043090	amino acid import	2/575	19/16266	0.143837	0.798683	SLC1A2/SLC7A1	2
BP	GO:0046037	GMP metabolic process	2/575	19/16266	0.143837	0.798683	GMPR2/GMPS	2
BP	GO:0046653	tetrahydrofolate metabolic process	2/575	19/16266	0.143837	0.798683	ALDH1L1/MTHFD2L	2
BP	GO:0046885	regulation of hormone biosynthetic process	2/575	19/16266	0.143837	0.798683	NR3C1/POR	2
BP	GO:0050901	leukocyte tethering or rolling	2/575	19/16266	0.143837	0.798683	SELPLG/PAWR	2
BP	GO:0055012	ventricular cardiac muscle cell differentiation	2/575	19/16266	0.143837	0.798683	MEF2A/MEF2C	2
BP	GO:0060045	positive regulation of cardiac muscle cell proliferation	2/575	19/16266	0.143837	0.798683	FGFR2/MEF2C	2
BP	GO:0060231	mesenchymal to epithelial transition	2/575	19/16266	0.143837	0.798683	GATA3/CTNNB1	2
BP	GO:0071480	cellular response to gamma radiation	2/575	19/16266	0.143837	0.798683	NOX4/DDIAS	2
BP	GO:1903670	regulation of sprouting angiogenesis	2/575	19/16266	0.143837	0.798683	HDAC9/MAP2K5	2
BP	GO:0006979	response to oxidative stress	17/575	363/16266	0.146208	0.810694	MGST1/ADNP2/SOD3/SOD2/TNFAIP3/CD36/APTX/IL18BP/FBLN5/NEIL1/MMP3/FANCC/DDIAS/PRDX2/APOD/GNB2L1/ERCC6	17
BP	GO:0001505	regulation of neurotransmitter levels	10/575	193/16266	0.146907	0.813417	SNCAIP/RIMS1/MEF2C/SLC1A2/GFAP/GLS2/SYTL2/PAK1/ZNF219/LRTOMT	10
BP	GO:0002756	MyD88-independent toll-like receptor signaling pathway	5/575	79/16266	0.147292	0.814392	MEF2A/MEF2C/MAPK10/RPS6KA3/IKBKG	5
BP	GO:0042472	inner ear morphogenesis	6/575	101/16266	0.147659	0.815264	COL11A1/FGFR2/EYA1/GATA3/TMIE/FGF3	6
BP	GO:0060996	dendritic spine development	4/575	58/16266	0.148528	0.818901	MEF2C/PAK1/LRP8/SLC9A6	4
BP	GO:0000380	alternative mRNA splicing, via spliceosome	3/575	38/16266	0.149938	0.819592	RBM25/NSRP1/SLU7	3
BP	GO:0009069	serine family amino acid metabolic process	3/575	38/16266	0.149938	0.819592	PHGDH/AGXT2/SDSL	3
BP	GO:0010464	regulation of mesenchymal cell proliferation	3/575	38/16266	0.149938	0.819592	FGFR2/FOXP2/CTNNB1	3
BP	GO:0015749	monosaccharide transport	8/575	147/16266	0.150056	0.819592	TSC2/GCK/RPS6KB1/SLC2A9/SLC1A2/NUP85/ASPSCR1/REPIN1	8
BP	GO:0002009	morphogenesis of an epithelium	21/575	465/16266	0.1504	0.819592	CD44/FGFR2/CLASP1/MEF2C/TSC2/EYA1/PLOD3/GATA3/NR3C1/TMTC3/FOXN4/PAK1/RHOC/CLASP2/T/CTNNB1/SEMA4C/MTSS1/TGIF1/FGF3/MAGI2	21
BP	GO:0006575	cellular modified amino acid metabolic process	11/575	218/16266	0.150815	0.819592	MGST1/HAGH/ERO1B/NOX4/GATA3/NAT8/ALDH1L1/MTHFD2L/CRTAP/DIO2/DDAH2	11
BP	GO:0060485	mesenchyme development	11/575	218/16266	0.150815	0.819592	WWTR1/FGFR2/CLASP1/MEF2C/CORO1C/GCNT2/DPPA4/PAX1/CLASP2/CTNNB1/AXIN2	11
BP	GO:0044270	cellular nitrogen compound catabolic process	20/575	440/16266	0.15088	0.819592	RPS20/PDE4A/PPP2R1A/GCK/RPL34/PDE4D/AGXT2/SLIRP/POR/RPS15A/RNASEH2B/DNA2/NEIL1/PARN/ALDH1L1/RPS3/SMG1/CDA/RPL23A/GNB2L1	20
BP	GO:0022407	regulation of cell-cell adhesion	17/575	365/16266	0.151148	0.819592	CD44/CYLD/FXYD5/GATA3/GCNT2/MAPKAP1/BTN2A2/IL36B/MAP2K5/ZC3H8/PAK1/ADAM8/NFKBID/PRDX2/CTNNB1/C1QTNF1/PAWR	17
BP	GO:0031349	positive regulation of defense response	19/575	415/16266	0.151188	0.819592	TNFRSF1A/MEF2A/MEF2C/CYLD/TYRO3/MAPK10/ERBB2IP/TNFAIP3/TRIM6/PSME3/ANKRD17/PUM1/CD36/PAK1/ADAM8/RPS6KA3/TLR5/CLEC6A/IKBKG	19
BP	GO:0030010	establishment of cell polarity	6/575	102/16266	0.152541	0.819592	MAP4/CLASP1/EYA1/GATA3/BCAS3/GNB2L1	6
BP	GO:0072329	monocarboxylic acid catabolic process	6/575	102/16266	0.152541	0.819592	LIPE/SULT2A1/AGXT2/PCCB/HADH/MMAA	6
BP	GO:1902600	hydrogen ion transmembrane transport	6/575	102/16266	0.152541	0.819592	ATP12A/ATP6V0A4/SLC47A1/COX6C/SLC36A2/SLC9A6	6
BP	GO:0030048	actin filament-based movement	5/575	80/16266	0.152871	0.819592	MYH14/MYL2/PDE4D/SUMO1/ANK2	5
BP	GO:0051146	striated muscle cell differentiation	12/575	243/16266	0.153678	0.819592	HDAC9/MEF2A/MEF2C/NOX4/CAPN3/DYRK1B/SOX6/MYL2/LDB3/FHOD3/TMTC3/UCHL1	12
BP	GO:0048015	phosphatidylinositol-mediated signaling	10/575	195/16266	0.153816	0.819592	FGFR2/TYRO3/TSC2/GATA3/RPS6KB1/MAPKAP1/NR4A1/FGF3/SEMA4D/FGF16	10
BP	GO:0014031	mesenchymal cell development	8/575	148/16266	0.15408	0.819592	WWTR1/FGFR2/CLASP1/CORO1C/GCNT2/CLASP2/CTNNB1/AXIN2	8
BP	GO:0021885	forebrain cell migration	4/575	59/16266	0.155185	0.819592	TYRO3/LRP8/CTNNB1/ADGRG1	4
BP	GO:0043401	steroid hormone mediated signaling pathway	4/575	59/16266	0.155185	0.819592	NR3C1/NR5A2/NR4A1/PPARG	4
BP	GO:0046324	regulation of glucose import	4/575	59/16266	0.155185	0.819592	RPS6KB1/SLC1A2/ASPSCR1/REPIN1	4
BP	GO:0010927	cellular component assembly involved in morphogenesis	13/575	268/16266	0.155733	0.819592	MEF2A/CLASP1/CYLD/CAPN3/ABLIM1/CLUAP1/MYL2/LDB3/FHOD3/SCLT1/RPGR/HYDIN/CLASP2	13
BP	GO:0001731	formation of translation preinitiation complex	2/575	20/16266	0.156261	0.819592	EIF3G/EIF3H	2
BP	GO:0006783	heme biosynthetic process	2/575	20/16266	0.156261	0.819592	SLC25A39/TSPO	2
BP	GO:0010996	response to auditory stimulus	2/575	20/16266	0.156261	0.819592	FOXP2/STRA6	2
BP	GO:0031664	regulation of lipopolysaccharide-mediated signaling pathway	2/575	20/16266	0.156261	0.819592	TNFAIP3/PRDX2	2
BP	GO:0032461	positive regulation of protein oligomerization	2/575	20/16266	0.156261	0.819592	MMP3/GNB2L1	2
BP	GO:0033233	regulation of protein sumoylation	2/575	20/16266	0.156261	0.819592	CAPN3/CTNNB1	2
BP	GO:0039528	cytoplasmic pattern recognition receptor signaling pathway in response to virus	2/575	20/16266	0.156261	0.819592	ANKRD17/PUM1	2
BP	GO:0042276	error-prone translesion synthesis	2/575	20/16266	0.156261	0.819592	POLI/RPA3	2
BP	GO:0070584	mitochondrion morphogenesis	2/575	20/16266	0.156261	0.819592	MYH14/SLIRP	2
BP	GO:0072079	nephron tubule formation	2/575	20/16266	0.156261	0.819592	GATA3/CTNNB1	2
BP	GO:0072234	metanephric nephron tubule development	2/575	20/16266	0.156261	0.819592	WWTR1/ACAT1	2
BP	GO:0097484	dendrite extension	2/575	20/16266	0.156261	0.819592	RIMS1/SLC9A6	2
BP	GO:0034110	regulation of homotypic cell-cell adhesion	14/575	293/16266	0.157152	0.819592	CD44/CYLD/GATA3/MAPKAP1/BTN2A2/IL36B/ZC3H8/PAK1/ADAM8/NFKBID/PRDX2/CTNNB1/C1QTNF1/PAWR	14
BP	GO:0051258	protein polymerization	11/575	220/16266	0.157397	0.819592	CLASP1/STMN2/TRIM6/FHOD3/TUBGCP4/TBCD/TWF1/TPPP3/CLASP2/MTSS1/CORO7	11
BP	GO:0051259	protein oligomerization	20/575	443/16266	0.157755	0.819592	MGST1/ACAT1/ATG16L1/SOD2/TNFAIP3/ATL2/TRIM6/KCNA6/CNGA4/PEX5/MMP3/CDA/ANGPTL4/DCXR/KCNS3/C1QTNF1/MAGI2/GNB2L1/ADSL/KCTD7	20
BP	GO:0006509	membrane protein ectodomain proteolysis	3/575	39/16266	0.15844	0.819592	SH3D19/ADAM8/NCSTN	3
BP	GO:0006734	NADH metabolic process	3/575	39/16266	0.15844	0.819592	IDH3G/GCK/ENO2	3
BP	GO:0010883	regulation of lipid storage	3/575	39/16266	0.15844	0.819592	MEST/PPARG/CD36	3
BP	GO:0045777	positive regulation of blood pressure	3/575	39/16266	0.15844	0.819592	PDE4D/NCF2/ADRA1D	3
BP	GO:0050854	regulation of antigen receptor-mediated signaling pathway	3/575	39/16266	0.15844	0.819592	CMTM3/GCSAM/PAWR	3
BP	GO:0060038	cardiac muscle cell proliferation	3/575	39/16266	0.15844	0.819592	FGFR2/MEF2C/KCNK2	3
BP	GO:2000351	regulation of endothelial cell apoptotic process	3/575	39/16266	0.15844	0.819592	GATA3/TNFAIP3/ANGPTL4	3
BP	GO:0006094	gluconeogenesis	5/575	81/16266	0.158536	0.819592	PCK2/GCK/ENO2/NR3C1/PC	5
BP	GO:0030004	cellular monovalent inorganic cation homeostasis	5/575	81/16266	0.158536	0.819592	ATP12A/SLC4A11/SGK3/ATP6V0A4/SGK1	5
BP	GO:0038034	signal transduction in absence of ligand	5/575	81/16266	0.158536	0.819592	EYA1/PPP2R1A/BCL2L2/MAP2K5/PRDX2	5
BP	GO:0097192	extrinsic apoptotic signaling pathway in absence of ligand	5/575	81/16266	0.158536	0.819592	EYA1/PPP2R1A/BCL2L2/MAP2K5/PRDX2	5
BP	GO:0003151	outflow tract morphogenesis	4/575	60/16266	0.161952	0.826991	FGFR2/MEF2C/EYA1/CTNNB1	4
BP	GO:0006809	nitric oxide biosynthetic process	4/575	60/16266	0.161952	0.826991	TSPO/AGXT2/TLR5/DDAH2	4
BP	GO:0019915	lipid storage	4/575	60/16266	0.161952	0.826991	MEST/ACVR1C/PPARG/CD36	4
BP	GO:0030166	proteoglycan biosynthetic process	4/575	60/16266	0.161952	0.826991	DCN/XYLT2/TCF7L2/CTNNB1	4
BP	GO:0050654	chondroitin sulfate proteoglycan metabolic process	4/575	60/16266	0.161952	0.826991	DCN/XYLT2/NDNF/SPOCK3	4
BP	GO:0051289	protein homotetramerization	4/575	60/16266	0.161952	0.826991	SOD2/PEX5/CDA/DCXR	4
BP	GO:0010594	regulation of endothelial cell migration	6/575	104/16266	0.162516	0.826991	HDAC9/GATA3/MAP2K5/BCAS3/CCBE1/FGF16	6
BP	GO:0030111	regulation of Wnt signaling pathway	14/575	295/16266	0.162932	0.826991	WWTR1/FGFR2/CYLD/TSC2/PPP2R1A/USP34/WLS/SMARCA4/PSME3/TCF7L2/EDA/CTNNB1/AXIN2/GNB2L1	14
BP	GO:0071407	cellular response to organic cyclic compound	17/575	370/16266	0.163895	0.826991	MEF2C/NOX4/RPS6KB1/CYP27B1/PDE4D/NR3C1/NR5A2/NR4A1/PPARG/NTS/BCAS3/PAK1/LRP8/CTNNB1/AXIN2/P2RY6/PAWR	17
BP	GO:0048017	inositol lipid-mediated signaling	10/575	198/16266	0.164478	0.826991	FGFR2/TYRO3/TSC2/GATA3/RPS6KB1/MAPKAP1/NR4A1/FGF3/SEMA4D/FGF16	10
BP	GO:0048871	multicellular organismal homeostasis	15/575	321/16266	0.166437	0.826991	USH2A/NOX3/NOX4/GCNT2/TNFAIP3/BARD1/ILDR2/ADAM8/TPP1/CTNNB1/MUC13/METRNL/PRKAR1B/SLC22A5/ERCC6	15
BP	GO:0006144	purine nucleobase metabolic process	3/575	40/16266	0.167085	0.826991	GMPR2/GMPS/ADSL	3
BP	GO:0045104	intermediate filament cytoskeleton organization	3/575	40/16266	0.167085	0.826991	ERBB2IP/GFAP/DST	3
BP	GO:0046834	lipid phosphorylation	3/575	40/16266	0.167085	0.826991	SPHK2/SMG1/SPHK1	3
BP	GO:0055010	ventricular cardiac muscle tissue morphogenesis	3/575	40/16266	0.167085	0.826991	COL11A1/FGFR2/MYL2	3
BP	GO:0050865	regulation of cell activation	20/575	447/16266	0.167186	0.826991	C12orf4/STXBP2/MEF2C/CYLD/TYRO3/CAPN3/GATA3/TNFAIP3/MAPKAP1/BTN2A2/PTPRE/IL36B/ZC3H8/PAK1/ADAM8/NFKBID/PRDX2/CTNNB1/C1QTNF1/PAWR	20
BP	GO:0033673	negative regulation of kinase activity	11/575	223/16266	0.167537	0.826991	WWTR1/WNK1/TSC2/PPP2R1A/CORO1C/RGS4/TNFAIP3/GMFG/UCHL1/PRKAR1B/GNB2L1	11
BP	GO:1903707	negative regulation of hemopoiesis	7/575	128/16266	0.167895	0.826991	CYLD/PRDM16/ZC3H8/NFKBID/PRDX2/CTNNB1/N4BP2L2	7
BP	GO:0051224	negative regulation of protein transport	10/575	199/16266	0.16811	0.826991	WWTR1/CYLD/ACVR1C/BTN2A2/CD36/BARD1/HADH/AXIN2/APOD/LITAF	10
BP	GO:0060560	developmental growth involved in morphogenesis	10/575	199/16266	0.16811	0.826991	FGFR2/RIMS1/COMP/POR/TMTC3/CLASP2/SLIT3/MAGI2/SEMA4D/SLC9A6	10
BP	GO:0003333	amino acid transmembrane transport	4/575	61/16266	0.168823	0.826991	SLC1A2/SLC7A1/SLC25A22/SLC36A2	4
BP	GO:0015807	L-amino acid transport	4/575	61/16266	0.168823	0.826991	SLC1A2/SLC7A1/SLC25A22/SLC36A2	4
BP	GO:0032272	negative regulation of protein polymerization	4/575	61/16266	0.168823	0.826991	STMN2/FHOD3/TBCD/TWF1	4
BP	GO:0032392	DNA geometric change	4/575	61/16266	0.168823	0.826991	RECQL5/CHD1L/DNA2/RUVBL1	4
BP	GO:0043297	apical junction assembly	4/575	61/16266	0.168823	0.826991	INADL/TBCD/RHOC/CLDN14	4
BP	GO:0070252	actin-mediated cell contraction	4/575	61/16266	0.168823	0.826991	MYL2/PDE4D/SUMO1/ANK2	4
BP	GO:1903426	regulation of reactive oxygen species biosynthetic process	4/575	61/16266	0.168823	0.826991	TSPO/AGXT2/TLR5/DDAH2	4
BP	GO:0001759	organ induction	2/575	21/16266	0.168878	0.826991	CTNNB1/FGF3	2
BP	GO:0002021	response to dietary excess	2/575	21/16266	0.168878	0.826991	ACVR1C/PPARG	2
BP	GO:0003416	endochondral bone growth	2/575	21/16266	0.168878	0.826991	COMP/POR	2
BP	GO:0007004	telomere maintenance via telomerase	2/575	21/16266	0.168878	0.826991	ACD/CTNNB1	2
BP	GO:0033137	negative regulation of peptidyl-serine phosphorylation	2/575	21/16266	0.168878	0.826991	PDE4D/GNB2L1	2
BP	GO:0042403	thyroid hormone metabolic process	2/575	21/16266	0.168878	0.826991	GATA3/DIO2	2
BP	GO:0043586	tongue development	2/575	21/16266	0.168878	0.826991	PRDM16/CTNNB1	2
BP	GO:0048745	smooth muscle tissue development	2/575	21/16266	0.168878	0.826991	FOXP2/STRA6	2
BP	GO:0051043	regulation of membrane protein ectodomain proteolysis	2/575	21/16266	0.168878	0.826991	SH3D19/ADAM8	2
BP	GO:0051882	mitochondrial depolarization	2/575	21/16266	0.168878	0.826991	TSPO/GNB2L1	2
BP	GO:0055023	positive regulation of cardiac muscle tissue growth	2/575	21/16266	0.168878	0.826991	FGFR2/MEF2C	2
BP	GO:0060602	branch elongation of an epithelium	2/575	21/16266	0.168878	0.826991	FGFR2/TMTC3	2
BP	GO:0071108	protein K48-linked deubiquitination	2/575	21/16266	0.168878	0.826991	USP34/TNFAIP3	2
BP	GO:0071379	cellular response to prostaglandin stimulus	2/575	21/16266	0.168878	0.826991	PPARG/P2RY6	2
BP	GO:0090322	regulation of superoxide metabolic process	2/575	21/16266	0.168878	0.826991	CD36/FBLN5	2
BP	GO:0048864	stem cell development	8/575	152/16266	0.170681	0.834772	WWTR1/FGFR2/CLASP1/CORO1C/GCNT2/CLASP2/CTNNB1/AXIN2	8
BP	GO:0034655	nucleobase-containing compound catabolic process	18/575	398/16266	0.171254	0.836528	RPS20/PDE4A/PPP2R1A/GCK/RPL34/PDE4D/AGXT2/SLIRP/RPS15A/RNASEH2B/DNA2/NEIL1/PARN/RPS3/SMG1/CDA/RPL23A/GNB2L1	18
BP	GO:0060348	bone development	9/575	176/16266	0.171793	0.838111	FGFR2/MEF2C/COMP/PAX1/POR/PRPSAP2/T/AXIN2/SEMA4D	9
BP	GO:0060070	canonical Wnt signaling pathway	13/575	274/16266	0.17415	0.847105	WWTR1/FGFR2/CYLD/GATA3/USP34/WLS/PSME3/TCF7L2/EDA/T/CTNNB1/AXIN2/FZD9	13
BP	GO:0071826	ribonucleoprotein complex subunit organization	10/575	201/16266	0.175488	0.847105	CIRBP/LUC7L3/MTERF4/EIF3G/GRB7/EIF3H/GFM2/SLU7/DYNC1H1/RPL23A	10
BP	GO:0070509	calcium ion import	4/575	62/16266	0.175796	0.847105	GCK/CTNNB1/PAWR/MRLN	4
BP	GO:0032924	activin receptor signaling pathway	3/575	41/16266	0.175865	0.847105	ACVR1C/TGIF1/MAGI2	3
BP	GO:0034121	regulation of toll-like receptor signaling pathway	3/575	41/16266	0.175865	0.847105	TYRO3/TNFAIP3/TLR5	3
BP	GO:0034453	microtubule anchoring	3/575	41/16266	0.175865	0.847105	CLASP1/CLASP2/CEP57L1	3
BP	GO:0045103	intermediate filament-based process	3/575	41/16266	0.175865	0.847105	ERBB2IP/GFAP/DST	3
BP	GO:0045123	cellular extravasation	3/575	41/16266	0.175865	0.847105	SELPLG/ADAM8/PAWR	3
BP	GO:0050853	B cell receptor signaling pathway	3/575	41/16266	0.175865	0.847105	MEF2C/CMTM3/GCSAM	3
BP	GO:0060420	regulation of heart growth	3/575	41/16266	0.175865	0.847105	FGFR2/MEF2C/KCNK2	3
BP	GO:0019319	hexose biosynthetic process	5/575	84/16266	0.176028	0.847105	PCK2/GCK/ENO2/NR3C1/PC	5
BP	GO:0007050	cell cycle arrest	12/575	250/16266	0.176245	0.847108	CAB39L/TSC2/LAMTOR2/PSME3/BARD1/MCPH1/TCF7L2/DST/DDIAS/CRADD/MUC1/MAGI2	12
BP	GO:1903828	negative regulation of cellular protein localization	7/575	130/16266	0.177227	0.849044	WWTR1/CYLD/CD36/BARD1/AXIN2/APOD/LITAF	7
BP	GO:0016925	protein sumoylation	6/575	107/16266	0.177984	0.849044	CAPN3/STAG2/EYA1/SUMO1/NUP85/CTNNB1	6
BP	GO:0097285	cell-type specific apoptotic process	19/575	426/16266	0.178068	0.849044	TRAF3IP2/MEF2C/TYRO3/GATA3/SOD2/NR3C1/NCF2/TNFAIP3/SPOP/CHL1/ZC3H8/TCF7L2/ADAM8/TSC22D3/DDIAS/NFKBID/ANGPTL4/NDNF/PAWR	19
BP	GO:0048011	neurotrophin TRK receptor signaling pathway	18/575	401/16266	0.179081	0.849044	FGFR2/MEF2A/MEF2C/TSC2/LAMTOR2/MAPKAP1/NR4A1/ARHGEF9/PSME3/MAP2K5/NCSTN/ARHGEF3/RPS6KA3/FGF3/PRKAR1B/FGF16/ARHGEF12/SLC9A6	18
BP	GO:1901605	alpha-amino acid metabolic process	12/575	251/16266	0.179595	0.849044	ERO1B/NOX4/PHGDH/AGXT2/GLS2/SDSL/ALDH1L1/HPD/GMPS/MTHFD2L/CRTAP/DDAH2	12
BP	GO:0071804	cellular potassium ion transport	9/575	178/16266	0.17977	0.849044	ATP12A/KCNK2/SUMO1/KCNA6/CNGA4/ANK2/KCNS3/KCNK7/CNGA1	9
BP	GO:0071805	potassium ion transmembrane transport	9/575	178/16266	0.17977	0.849044	ATP12A/KCNK2/SUMO1/KCNA6/CNGA4/ANK2/KCNS3/KCNK7/CNGA1	9
BP	GO:1901136	carbohydrate derivative catabolic process	9/575	178/16266	0.17977	0.849044	DCN/CD44/PDE4A/OGN/PDE4D/AGXT2/NEIL1/CDA/GNB2L1	9
BP	GO:0060562	epithelial tube morphogenesis	15/575	326/16266	0.180892	0.849044	CD44/FGFR2/MEF2C/TSC2/EYA1/GATA3/NR3C1/TMTC3/FOXN4/PAK1/T/CTNNB1/SEMA4C/MTSS1/TGIF1	15
BP	GO:0007263	nitric oxide mediated signal transduction	2/575	22/16266	0.181658	0.849044	CD36/DDAH2	2
BP	GO:0010669	epithelial structure maintenance	2/575	22/16266	0.181658	0.849044	MUC13/SLC22A5	2
BP	GO:0032204	regulation of telomere maintenance	2/575	22/16266	0.181658	0.849044	ACD/CTNNB1	2
BP	GO:0034122	negative regulation of toll-like receptor signaling pathway	2/575	22/16266	0.181658	0.849044	TYRO3/TNFAIP3	2
BP	GO:0035767	endothelial cell chemotaxis	2/575	22/16266	0.181658	0.849044	NR4A1/FGF16	2
BP	GO:0042347	negative regulation of NF-kappaB import into nucleus	2/575	22/16266	0.181658	0.849044	CYLD/LITAF	2
BP	GO:0045822	negative regulation of heart contraction	2/575	22/16266	0.181658	0.849044	PDE4D/ADRA1D	2
BP	GO:0046135	pyrimidine nucleoside catabolic process	2/575	22/16266	0.181658	0.849044	AGXT2/CDA	2
BP	GO:0070536	protein K63-linked deubiquitination	2/575	22/16266	0.181658	0.849044	CYLD/TNFAIP3	2
BP	GO:0071526	semaphorin-plexin signaling pathway	2/575	22/16266	0.181658	0.849044	SEMA4C/SEMA4D	2
BP	GO:0072170	metanephric tubule development	2/575	22/16266	0.181658	0.849044	WWTR1/ACAT1	2
BP	GO:0097237	cellular response to toxic substance	2/575	22/16266	0.181658	0.849044	MEF2C/CERS1	2
BP	GO:1902253	regulation of intrinsic apoptotic signaling pathway by p53 class mediator	2/575	22/16266	0.181658	0.849044	CD44/MUC1	2
BP	GO:1902624	positive regulation of neutrophil migration	2/575	22/16266	0.181658	0.849044	ADAM8/PAWR	2
BP	GO:0090263	positive regulation of canonical Wnt signaling pathway	7/575	131/16266	0.181975	0.849507	FGFR2/USP34/WLS/PSME3/EDA/CTNNB1/AXIN2	7
BP	GO:0098661	inorganic anion transmembrane transport	6/575	108/16266	0.183268	0.854521	CLCA1/SLC4A11/CLCC1/TTYH2/BEST1/GABRG3	6
BP	GO:0006903	vesicle targeting	3/575	42/16266	0.184769	0.855381	CLASP1/ARFGAP1/CLASP2	3
BP	GO:0009409	response to cold	3/575	42/16266	0.184769	0.855381	CIRBP/PPARG/METRNL	3
BP	GO:0014015	positive regulation of gliogenesis	3/575	42/16266	0.184769	0.855381	TSPO/GFAP/PPARG	3
BP	GO:0046626	regulation of insulin receptor signaling pathway	3/575	42/16266	0.184769	0.855381	TSC2/RPS6KB1/PTPRE	3
BP	GO:1903201	regulation of oxidative stress-induced cell death	3/575	42/16266	0.184769	0.855381	SOD2/MMP3/GNB2L1	3
BP	GO:2000378	negative regulation of reactive oxygen species metabolic process	3/575	42/16266	0.184769	0.855381	TSPO/MMP3/PRDX2	3
BP	GO:0006937	regulation of muscle contraction	8/575	156/16266	0.188051	0.868633	NMU/MYL2/PDE4D/SUMO1/ANK2/ADRA1D/SPHK1/PAWR	8
BP	GO:0009124	nucleoside monophosphate biosynthetic process	5/575	86/16266	0.188078	0.868633	ATP6V0A4/AK9/GMPS/ENTPD8/ADSL	5
BP	GO:0009311	oligosaccharide metabolic process	4/575	64/16266	0.190025	0.87659	ST3GAL6/ST3GAL5/B3GALNT1/ST8SIA3	4
BP	GO:0040013	negative regulation of locomotion	11/575	230/16266	0.19239	0.876839	CLASP1/GATA3/CORO1C/ACVR1C/MAP2K5/RNF20/CLASP2/GCSAM/MAGI2/APOD/ADGRG1	11
BP	GO:0045927	positive regulation of growth	11/575	230/16266	0.19239	0.876839	FGFR2/RIMS1/MEF2C/CAPN3/ADNP2/RPS6KB1/MAP2K5/RAG2/SPHK1/RPS6KA3/SEMA4D	11
BP	GO:0007067	mitotic nuclear division	18/575	406/16266	0.192524	0.876839	PPP1R12A/FGFR2/CLASP1/KIF22/HAUS4/STAG2/PPP2R1A/RECQL5/NEK4/SMARCA4/TUBGCP4/RPS3/CHEK1/CLASP2/STRA13/RUVBL1/CHMP6/CEP57L1	18
BP	GO:0044708	single-organism behavior	18/575	406/16266	0.192524	0.876839	MEF2C/KCNK2/TSPO/MYH14/RPS6KB1/SLC1A2/EPM2A/PDE4D/SGK1/FOXP2/NTS/CHL1/PUM1/STRA6/PAK1/UCHL1/PRKAR1B/FZD9	18
BP	GO:0032480	negative regulation of type I interferon production	3/575	43/16266	0.193789	0.876839	CYLD/TNFAIP3/RNF135	3
BP	GO:0035315	hair cell differentiation	3/575	43/16266	0.193789	0.876839	USH2A/CTNNB1/LRTOMT	3
BP	GO:0048806	genitalia development	3/575	43/16266	0.193789	0.876839	TYRO3/STRA6/CTNNB1	3
BP	GO:0060761	negative regulation of response to cytokine stimulus	3/575	43/16266	0.193789	0.876839	PPARG/MAP2K5/SLIT3	3
BP	GO:0072577	endothelial cell apoptotic process	3/575	43/16266	0.193789	0.876839	GATA3/TNFAIP3/ANGPTL4	3
BP	GO:1903428	positive regulation of reactive oxygen species biosynthetic process	3/575	43/16266	0.193789	0.876839	AGXT2/TLR5/DDAH2	3
BP	GO:0033273	response to vitamin	5/575	87/16266	0.194211	0.876839	TSPO/CYP27B1/PPARG/PAWR/LTC4S	5
BP	GO:0051101	regulation of DNA binding	5/575	87/16266	0.194211	0.876839	ACD/GATA3/SUMO1/TRIM6/ZFP90	5
BP	GO:0006359	regulation of transcription from RNA polymerase III promoter	2/575	23/16266	0.194575	0.876839	ZC3H8/BRF1	2
BP	GO:0007398	ectoderm development	2/575	23/16266	0.194575	0.876839	EDA/CTNNB1	2
BP	GO:0014009	glial cell proliferation	2/575	23/16266	0.194575	0.876839	TSPO/GFAP	2
BP	GO:0015813	L-glutamate transport	2/575	23/16266	0.194575	0.876839	SLC1A2/SLC25A22	2
BP	GO:0043954	cellular component maintenance	2/575	23/16266	0.194575	0.876839	KIFC3/MTSS1	2
BP	GO:0071470	cellular response to osmotic stress	2/575	23/16266	0.194575	0.876839	CAPN3/TSPO	2
BP	GO:0072243	metanephric nephron epithelium development	2/575	23/16266	0.194575	0.876839	WWTR1/ACAT1	2
BP	GO:0051924	regulation of calcium ion transport	10/575	206/16266	0.194578	0.876839	GNB5/CAPN3/TSPO/PDE4D/SUMO1/ANK2/BEST1/CTNNB1/PAWR/MRLN	10
BP	GO:0015711	organic anion transport	18/575	407/16266	0.19527	0.878942	RIMS1/SLC4A11/FOLR3/SLC1A2/SLC16A10/SLC35A3/GIPC1/PPARG/CD36/GLS2/SLC7A1/PAK1/GRM2/SLC35A1/SLC25A22/SLC36A2/SLC22A5/REPIN1	18
BP	GO:0061448	connective tissue development	11/575	231/16266	0.19607	0.881133	CD44/COL11A1/ACAT1/MEF2C/DYRK1B/COMP/SOX6/POR/KIAA1715/CTNNB1/AXIN2	11
BP	GO:0030258	lipid modification	9/575	182/16266	0.196209	0.881133	SPHK2/PCCB/POR/PPARG/HADH/MMAA/SMG1/SPHK1/APOD	9
BP	GO:0007015	actin filament organization	14/575	307/16266	0.199824	0.889596	FRY/CLASP1/NOX4/ASAP3/GMFG/FHOD3/PAK1/TWF1/PPP1R9A/CLASP2/MTSS1/RND1/PAWR/CORO7	14
BP	GO:0045444	fat cell differentiation	9/575	183/16266	0.200416	0.889596	WWTR1/GATA3/NR4A1/PPARG/PRDM16/TCF7L2/FAM57B/PEX11A/METRNL	9
BP	GO:0051216	cartilage development	9/575	183/16266	0.200416	0.889596	CD44/COL11A1/MEF2C/COMP/SOX6/POR/KIAA1715/CTNNB1/AXIN2	9
BP	GO:0070646	protein modification by small protein removal	7/575	135/16266	0.201481	0.889596	CYLD/USP14/USP34/TNFAIP3/USP6/USP30/UCHL1	7
BP	GO:0030217	T cell differentiation	10/575	208/16266	0.20246	0.889596	CYLD/GATA3/PAX1/IL36B/ZC3H8/ADAM8/NFKBID/PRDX2/CTNNB1/RAG2	10
BP	GO:0003281	ventricular septum development	3/575	44/16266	0.202916	0.889596	FGFR2/GATA3/STRA6	3
BP	GO:0032784	regulation of DNA-templated transcription, elongation	3/575	44/16266	0.202916	0.889596	RECQL5/TSFM/ERCC6	3
BP	GO:0034113	heterotypic cell-cell adhesion	3/575	44/16266	0.202916	0.889596	CD44/GCNT2/MAP2K5	3
BP	GO:0034394	protein localization to cell surface	3/575	44/16266	0.202916	0.889596	FBLN5/ANK2/CTNNB1	3
BP	GO:0042992	negative regulation of transcription factor import into nucleus	3/575	44/16266	0.202916	0.889596	CYLD/CD36/LITAF	3
BP	GO:0048483	autonomic nervous system development	3/575	44/16266	0.202916	0.889596	GATA3/GFRA3/CTNNB1	3
BP	GO:0086004	regulation of cardiac muscle cell contraction	3/575	44/16266	0.202916	0.889596	PDE4D/SUMO1/ANK2	3
BP	GO:0098656	anion transmembrane transport	12/575	258/16266	0.20387	0.889596	CLCA1/SLC4A11/SLC1A2/SLC35A3/CLCC1/SLC7A1/TTYH2/BEST1/SLC25A22/GABRG3/SLC36A2/SLC22A5	12
BP	GO:0003279	cardiac septum development	4/575	66/16266	0.204604	0.889596	FGFR2/GATA3/STRA6/ANK2	4
BP	GO:1901019	regulation of calcium ion transmembrane transporter activity	4/575	66/16266	0.204604	0.889596	GNB5/PDE4D/SUMO1/ANK2	4
BP	GO:2000648	positive regulation of stem cell proliferation	4/575	66/16266	0.204604	0.889596	FGFR2/FOXP2/CTNNB1/N4BP2L2	4
BP	GO:0061025	membrane fusion	8/575	160/16266	0.206135	0.889596	PHF23/RIMS1/VTI1B/SEC22A/USP30/IZUMO1/VPS33B/SERPINA5	8
BP	GO:0006813	potassium ion transport	10/575	209/16266	0.206452	0.889596	ATP12A/KCNK2/GCK/SUMO1/KCNA6/CNGA4/ANK2/KCNS3/KCNK7/CNGA1	10
BP	GO:1903037	regulation of leukocyte cell-cell adhesion	13/575	284/16266	0.207085	0.889596	CD44/CYLD/GATA3/MAPKAP1/BTN2A2/IL36B/ZC3H8/PAK1/ADAM8/NFKBID/PRDX2/CTNNB1/PAWR	13
BP	GO:0006401	RNA catabolic process	11/575	234/16266	0.207298	0.889596	RPS20/PPP2R1A/RPL34/SLIRP/RPS15A/RNASEH2B/DNA2/PARN/RPS3/SMG1/RPL23A	11
BP	GO:0006278	RNA-dependent DNA replication	2/575	24/16266	0.207602	0.889596	ACD/CTNNB1	2
BP	GO:0006706	steroid catabolic process	2/575	24/16266	0.207602	0.889596	SULT2A1/CYP27B1	2
BP	GO:0009110	vitamin biosynthetic process	2/575	24/16266	0.207602	0.889596	CYP27B1/MMAA	2
BP	GO:0010458	exit from mitosis	2/575	24/16266	0.207602	0.889596	CLASP1/CLASP2	2
BP	GO:0010737	protein kinase A signaling	2/575	24/16266	0.207602	0.889596	PDE4A/PDE4D	2
BP	GO:0030194	positive regulation of blood coagulation	2/575	24/16266	0.207602	0.889596	CD36/PRDX2	2
BP	GO:0034047	regulation of protein phosphatase type 2A activity	2/575	24/16266	0.207602	0.889596	PPP2R1A/PPP2R4	2
BP	GO:0034695	response to prostaglandin E	2/575	24/16266	0.207602	0.889596	PPARG/P2RY6	2
BP	GO:0035412	regulation of catenin import into nucleus	2/575	24/16266	0.207602	0.889596	WWTR1/AXIN2	2
BP	GO:0048799	organ maturation	2/575	24/16266	0.207602	0.889596	GATA3/SEMA4D	2
BP	GO:0050435	beta-amyloid metabolic process	2/575	24/16266	0.207602	0.889596	NAT8/NCSTN	2
BP	GO:0050974	detection of mechanical stimulus involved in sensory perception	2/575	24/16266	0.207602	0.889596	COL11A1/PAWR	2
BP	GO:0051569	regulation of histone H3-K4 methylation	2/575	24/16266	0.207602	0.889596	GATA3/CTNNB1	2
BP	GO:0060334	regulation of interferon-gamma-mediated signaling pathway	2/575	24/16266	0.207602	0.889596	SUMO1/PPARG	2
BP	GO:0071354	cellular response to interleukin-6	2/575	24/16266	0.207602	0.889596	ST3GAL6/SELPLG	2
BP	GO:0071875	adrenergic receptor signaling pathway	2/575	24/16266	0.207602	0.889596	PDE4D/ADRA1D	2
BP	GO:1900048	positive regulation of hemostasis	2/575	24/16266	0.207602	0.889596	CD36/PRDX2	2
BP	GO:2000404	regulation of T cell migration	2/575	24/16266	0.207602	0.889596	ADAM8/APOD	2
BP	GO:0002768	immune response-regulating cell surface receptor signaling pathway	21/575	489/16266	0.208134	0.889596	BTN3A1/CYFIP2/FGFR2/MEF2C/TSC2/GATA3/MAPK10/PDE4D/LAMTOR2/MAPKAP1/NR4A1/PSME3/CMTM3/PAK1/GCSAM/PAWR/PLA2G6/FGF3/FGF16/CLEC6A/IKBKG	21
BP	GO:0051402	neuron apoptotic process	10/575	210/16266	0.210476	0.889596	MEF2C/TYRO3/GATA3/SOD2/NR3C1/NCF2/CHL1/ADAM8/NDNF/PAWR	10
BP	GO:0045786	negative regulation of cell cycle	21/575	490/16266	0.210747	0.889596	FGFR2/STAG2/CAB39L/TSC2/GATA3/LAMTOR2/TNFAIP3/NR4A1/SMARCA4/PSME3/BARD1/MCPH1/TCF7L2/CHEK1/DST/RAD17/DDIAS/CTNNB1/CRADD/MUC1/MAGI2	21
BP	GO:0001578	microtubule bundle formation	4/575	67/16266	0.212014	0.889596	MARK4/CLASP1/HYDIN/TPPP3	4
BP	GO:0006488	dolichol-linked oligosaccharide biosynthetic process	4/575	67/16266	0.212014	0.889596	ST3GAL6/ST3GAL5/SLC35A1/ST8SIA3	4
BP	GO:0009127	purine nucleoside monophosphate biosynthetic process	4/575	67/16266	0.212014	0.889596	ATP6V0A4/AK9/GMPS/ADSL	4
BP	GO:0009168	purine ribonucleoside monophosphate biosynthetic process	4/575	67/16266	0.212014	0.889596	ATP6V0A4/AK9/GMPS/ADSL	4
BP	GO:0060675	ureteric bud morphogenesis	4/575	67/16266	0.212014	0.889596	CD44/EYA1/GATA3/CTNNB1	4
BP	GO:0001709	cell fate determination	3/575	45/16266	0.21214	0.889596	MEF2C/GATA3/CTNNB1	3
BP	GO:0002011	morphogenesis of an epithelial sheet	3/575	45/16266	0.21214	0.889596	CLASP1/RHOC/CLASP2	3
BP	GO:0021795	cerebral cortex cell migration	3/575	45/16266	0.21214	0.889596	LRP8/CTNNB1/ADGRG1	3
BP	GO:0035987	endodermal cell differentiation	3/575	45/16266	0.21214	0.889596	COL11A1/COL4A2/CTNNB1	3
BP	GO:0046928	regulation of neurotransmitter secretion	3/575	45/16266	0.21214	0.889596	SNCAIP/RIMS1/MEF2C	3
BP	GO:0051966	regulation of synaptic transmission, glutamatergic	3/575	45/16266	0.21214	0.889596	MEF2C/GRM1/GRM2	3
BP	GO:0090303	positive regulation of wound healing	3/575	45/16266	0.21214	0.889596	CAPN3/CD36/PRDX2	3
BP	GO:0001656	metanephros development	5/575	90/16266	0.213017	0.889596	WWTR1/ACAT1/EYA1/GATA3/CTNNB1	5
BP	GO:0007034	vacuolar transport	5/575	90/16266	0.213017	0.889596	VTI1B/SNX16/DENND3/CHMP6/VPS13A	5
BP	GO:0042445	hormone metabolic process	9/575	186/16266	0.21326	0.889596	ERO1B/GATA3/NR3C1/POR/CGA/STRA6/TCF7L2/SULT1A1/DIO2	9
BP	GO:0046700	heterocycle catabolic process	19/575	440/16266	0.215569	0.889596	RPS20/PDE4A/PPP2R1A/GCK/RPL34/PDE4D/AGXT2/SLIRP/RPS15A/RNASEH2B/DNA2/NEIL1/PARN/ALDH1L1/RPS3/SMG1/CDA/RPL23A/GNB2L1	19
BP	GO:0006664	glycolipid metabolic process	6/575	114/16266	0.216203	0.889596	ST3GAL6/ST3GAL5/GBGT1/PGAP2/ST8SIA3/PIGN	6
BP	GO:0050852	T cell receptor signaling pathway	6/575	114/16266	0.216203	0.889596	BTN3A1/GATA3/PDE4D/PAK1/PAWR/IKBKG	6
BP	GO:0045619	regulation of lymphocyte differentiation	7/575	138/16266	0.216617	0.889596	CYLD/GATA3/IL36B/ZC3H8/ADAM8/NFKBID/PRDX2	7
BP	GO:0000086	G2/M transition of mitotic cell cycle	9/575	187/16266	0.217612	0.889596	PPP1R12A/CLASP1/ABCB1/PPP2R1A/FBXL15/RNASEH2B/TUBGCP4/CHEK1/DYNC1H1	9
BP	GO:0019395	fatty acid oxidation	5/575	91/16266	0.219411	0.889596	PCCB/POR/PPARG/HADH/MMAA	5
BP	GO:0046364	monosaccharide biosynthetic process	5/575	91/16266	0.219411	0.889596	PCK2/GCK/ENO2/NR3C1/PC	5
BP	GO:1902476	chloride transmembrane transport	5/575	91/16266	0.219411	0.889596	CLCA1/CLCC1/TTYH2/BEST1/GABRG3	5
BP	GO:1903825	organic acid transmembrane transport	5/575	91/16266	0.219411	0.889596	SLC1A2/SLC7A1/SLC25A22/SLC36A2/SLC22A5	5
BP	GO:0072171	mesonephric tubule morphogenesis	4/575	68/16266	0.219497	0.889596	CD44/EYA1/GATA3/CTNNB1	4
BP	GO:1903169	regulation of calcium ion transmembrane transport	4/575	68/16266	0.219497	0.889596	GNB5/PDE4D/SUMO1/ANK2	4
BP	GO:0030177	positive regulation of Wnt signaling pathway	8/575	163/16266	0.220132	0.889596	FGFR2/USP34/WLS/SMARCA4/PSME3/EDA/CTNNB1/AXIN2	8
BP	GO:0000959	mitochondrial RNA metabolic process	2/575	25/16266	0.220716	0.889596	SLIRP/MTERF4	2
BP	GO:0002063	chondrocyte development	2/575	25/16266	0.220716	0.889596	COL11A1/AXIN2	2
BP	GO:0006779	porphyrin-containing compound biosynthetic process	2/575	25/16266	0.220716	0.889596	SLC25A39/TSPO	2
BP	GO:0009065	glutamine family amino acid catabolic process	2/575	25/16266	0.220716	0.889596	GLS2/DDAH2	2
BP	GO:0010226	response to lithium ion	2/575	25/16266	0.220716	0.889596	PPARG/NTS	2
BP	GO:0010800	positive regulation of peptidyl-threonine phosphorylation	2/575	25/16266	0.220716	0.889596	TRIM6/SPHK1	2
BP	GO:0010880	regulation of release of sequestered calcium ion into cytosol by sarcoplasmic reticulum	2/575	25/16266	0.220716	0.889596	PDE4D/ANK2	2
BP	GO:0015800	acidic amino acid transport	2/575	25/16266	0.220716	0.889596	SLC1A2/SLC25A22	2
BP	GO:0030149	sphingolipid catabolic process	2/575	25/16266	0.220716	0.889596	ACER1/SPHK1	2
BP	GO:0030206	chondroitin sulfate biosynthetic process	2/575	25/16266	0.220716	0.889596	DCN/XYLT2	2
BP	GO:0032201	telomere maintenance via semi-conservative replication	2/575	25/16266	0.220716	0.889596	RPA3/DNA2	2
BP	GO:0035411	catenin import into nucleus	2/575	25/16266	0.220716	0.889596	WWTR1/AXIN2	2
BP	GO:0040001	establishment of mitotic spindle localization	2/575	25/16266	0.220716	0.889596	CLASP1/EYA1	2
BP	GO:0045992	negative regulation of embryonic development	2/575	25/16266	0.220716	0.889596	GATA3/CTNNB1	2
BP	GO:0048246	macrophage chemotaxis	2/575	25/16266	0.220716	0.889596	NUP85/CKLF	2
BP	GO:0051491	positive regulation of filopodium assembly	2/575	25/16266	0.220716	0.889596	BCAS3/GPM6A	2
BP	GO:0060330	regulation of response to interferon-gamma	2/575	25/16266	0.220716	0.889596	SUMO1/PPARG	2
BP	GO:0060421	positive regulation of heart growth	2/575	25/16266	0.220716	0.889596	FGFR2/MEF2C	2
BP	GO:0002694	regulation of leukocyte activation	18/575	416/16266	0.220828	0.889596	C12orf4/STXBP2/MEF2C/CYLD/TYRO3/GATA3/TNFAIP3/MAPKAP1/BTN2A2/PTPRE/IL36B/ZC3H8/PAK1/ADAM8/NFKBID/PRDX2/CTNNB1/PAWR	18
BP	GO:0010463	mesenchymal cell proliferation	3/575	46/16266	0.221453	0.889596	FGFR2/FOXP2/CTNNB1	3
BP	GO:0032233	positive regulation of actin filament bundle assembly	3/575	46/16266	0.221453	0.889596	NOX4/PAK1/MTSS1	3
BP	GO:0051099	positive regulation of binding	6/575	115/16266	0.22188	0.889596	MEF2C/ACD/GATA3/TRIM6/TCF7L2/EPB41	6
BP	GO:0009749	response to glucose	8/575	164/16266	0.224875	0.889596	NOX4/GCK/RPS6KB1/NCF2/ACVR1C/ILDR2/TCF7L2/GNB2L1	8
BP	GO:0033157	regulation of intracellular protein transport	16/575	366/16266	0.225531	0.889596	WWTR1/CYLD/CD36/GLS2/BARD1/BCAS3/TCF7L2/EDA/AXIN2/NMUR1/PARL/RUVBL1/SPHK1/APOD/LITAF/GNB2L1	16
BP	GO:0002064	epithelial cell development	10/575	214/16266	0.226889	0.889596	FGFR2/TNFRSF1A/PLOD3/GATA3/PDE4D/PALLD/HYDIN/CTNNB1/LRTOMT/MAGI2	10
BP	GO:0007098	centrosome cycle	4/575	69/16266	0.22705	0.889596	CCDC18/TUBGCP4/CHEK1/CTNNB1	4
BP	GO:0009064	glutamine family amino acid metabolic process	4/575	69/16266	0.22705	0.889596	PHGDH/GLS2/GMPS/DDAH2	4
BP	GO:0032411	positive regulation of transporter activity	4/575	69/16266	0.22705	0.889596	SGK3/SUMO1/SGK1/ANK2	4
BP	GO:0001704	formation of primary germ layer	6/575	116/16266	0.227606	0.889596	COL11A1/FGFR2/WLS/COL4A2/T/CTNNB1	6
BP	GO:1903509	liposaccharide metabolic process	6/575	116/16266	0.227606	0.889596	ST3GAL6/ST3GAL5/GBGT1/PGAP2/ST8SIA3/PIGN	6
BP	GO:0003002	regionalization	15/575	341/16266	0.227736	0.889596	FGFR2/MEF2C/ACD/LHX3/FBXL15/DBX1/WLS/PAX1/FOXN4/T/CTNNB1/AXIN2/TGIF1/FGF3/ADGRG1	15
BP	GO:0001667	ameboidal-type cell migration	13/575	290/16266	0.228079	0.889596	HDAC9/CLASP1/GATA3/CORO1C/GIPC1/NR4A1/ACVR1C/MAP2K5/BCAS3/CLASP2/T/CCBE1/FGF16	13
BP	GO:0001822	kidney development	12/575	265/16266	0.229501	0.889596	DCN/WWTR1/CD44/FGFR2/ACAT1/MEF2C/EYA1/GATA3/STRA6/CTNNB1/MTSS1/MAGI2	12
BP	GO:0003229	ventricular cardiac muscle tissue development	3/575	47/16266	0.230845	0.889596	COL11A1/FGFR2/MYL2	3
BP	GO:0031060	regulation of histone methylation	3/575	47/16266	0.230845	0.889596	GATA3/RNF20/CTNNB1	3
BP	GO:0044786	cell cycle DNA replication	3/575	47/16266	0.230845	0.889596	STAG2/RPA3/DNA2	3
BP	GO:0051568	histone H3-K4 methylation	3/575	47/16266	0.230845	0.889596	GATA3/CXXC1/CTNNB1	3
BP	GO:0032409	regulation of transporter activity	9/575	190/16266	0.230874	0.889596	GNB5/MEF2C/FXYD5/SGK3/PDE4D/SUMO1/SGK1/PPARG/ANK2	9
BP	GO:0031016	pancreas development	5/575	93/16266	0.232372	0.889596	GCK/NR5A2/ILDR2/TCF7L2/CTNNB1	5
BP	GO:0009163	nucleoside biosynthetic process	6/575	117/16266	0.23338	0.889596	ATP6V0A4/AK9/CDA/GMPS/NME9/ADSL	6
BP	GO:0007616	long-term memory	2/575	26/16266	0.233895	0.889596	RPS6KB1/SGK1	2
BP	GO:0036151	phosphatidylcholine acyl-chain remodeling	2/575	26/16266	0.233895	0.889596	PLB1/PLA2G6	2
BP	GO:0050820	positive regulation of coagulation	2/575	26/16266	0.233895	0.889596	CD36/PRDX2	2
BP	GO:0055025	positive regulation of cardiac muscle tissue development	2/575	26/16266	0.233895	0.889596	FGFR2/MEF2C	2
BP	GO:0060571	morphogenesis of an epithelial fold	2/575	26/16266	0.233895	0.889596	FGFR2/CTNNB1	2
BP	GO:0072207	metanephric epithelium development	2/575	26/16266	0.233895	0.889596	WWTR1/ACAT1	2
BP	GO:1901797	negative regulation of signal transduction by p53 class mediator	2/575	26/16266	0.233895	0.889596	CD44/MUC1	2
BP	GO:2000826	regulation of heart morphogenesis	2/575	26/16266	0.233895	0.889596	EYA1/CTNNB1	2
BP	GO:0006921	cellular component disassembly involved in execution phase of apoptosis	4/575	70/16266	0.234667	0.889596	ACVR1C/CTNNB1/FNTA/PLEC	4
BP	GO:0048705	skeletal system morphogenesis	10/575	216/16266	0.235277	0.889596	COL11A1/FGFR2/MEF2C/EYA1/COMP/PAX1/POR/T/CTNNB1/AXIN2	10
BP	GO:2000116	regulation of cysteine-type endopeptidase activity	10/575	216/16266	0.235277	0.889596	CD44/CYFIP2/ACVR1C/POR/PPARG/MAP2K5/CRADD/RPS6KA3/PAWR/GNB2L1	10
BP	GO:0022618	ribonucleoprotein complex assembly	9/575	191/16266	0.23536	0.889596	CIRBP/LUC7L3/MTERF4/EIF3G/GRB7/EIF3H/SLU7/DYNC1H1/RPL23A	9
BP	GO:0044839	cell cycle G2/M phase transition	9/575	191/16266	0.23536	0.889596	PPP1R12A/CLASP1/ABCB1/PPP2R1A/FBXL15/RNASEH2B/TUBGCP4/CHEK1/DYNC1H1	9
BP	GO:0018209	peptidyl-serine modification	11/575	242/16266	0.238511	0.889596	DCN/CD44/SGK3/PDE4D/SGK1/TRIM6/PAK1/SMG1/NDNF/SPOCK3/GNB2L1	11
BP	GO:0042451	purine nucleoside biosynthetic process	5/575	94/16266	0.238932	0.889596	ATP6V0A4/AK9/GMPS/NME9/ADSL	5
BP	GO:0042990	regulation of transcription factor import into nucleus	5/575	94/16266	0.238932	0.889596	CYLD/CD36/EDA/SPHK1/LITAF	5
BP	GO:0046129	purine ribonucleoside biosynthetic process	5/575	94/16266	0.238932	0.889596	ATP6V0A4/AK9/GMPS/NME9/ADSL	5
BP	GO:0060993	kidney morphogenesis	5/575	94/16266	0.238932	0.889596	WWTR1/CD44/EYA1/GATA3/CTNNB1	5
BP	GO:2000241	regulation of reproductive process	5/575	94/16266	0.238932	0.889596	FGFR2/PPP2R1A/ACVR1C/TEKT3/CTNNB1	5
BP	GO:0042306	regulation of protein import into nucleus	8/575	167/16266	0.239322	0.889596	WWTR1/CYLD/CD36/EDA/AXIN2/SPHK1/APOD/LITAF	8
BP	GO:0021517	ventral spinal cord development	3/575	48/16266	0.24031	0.889596	LHX3/DBX1/FOXN4	3
BP	GO:0043525	positive regulation of neuron apoptotic process	3/575	48/16266	0.24031	0.889596	NR3C1/NCF2/PAWR	3
BP	GO:0045600	positive regulation of fat cell differentiation	3/575	48/16266	0.24031	0.889596	PPARG/PRDM16/METRNL	3
BP	GO:0046677	response to antibiotic	3/575	48/16266	0.24031	0.889596	MEF2C/ZC3H8/HID1	3
BP	GO:0051926	negative regulation of calcium ion transport	3/575	48/16266	0.24031	0.889596	GNB5/PAWR/MRLN	3
BP	GO:0071695	anatomical structure maturation	3/575	48/16266	0.24031	0.889596	GATA3/ANKRD17/SEMA4D	3
BP	GO:1903115	regulation of actin filament-based movement	3/575	48/16266	0.24031	0.889596	PDE4D/SUMO1/ANK2	3
BP	GO:0006282	regulation of DNA repair	4/575	71/16266	0.242345	0.889596	EYA1/RPS3/CHEK1/AXIN2	4
BP	GO:0010923	negative regulation of phosphatase activity	4/575	71/16266	0.242345	0.889596	WNK1/PPP2R4/SYTL2/SEMA4D	4
BP	GO:0071260	cellular response to mechanical stimulus	4/575	71/16266	0.242345	0.889596	TNFRSF1A/CHEK1/CRADD/TLR5	4
BP	GO:1901616	organic hydroxy compound catabolic process	4/575	71/16266	0.242345	0.889596	SULT2A1/CYP27B1/EPM2A/LRTOMT	4
BP	GO:0071383	cellular response to steroid hormone stimulus	7/575	143/16266	0.242704	0.889596	NR3C1/NR5A2/NR4A1/PPARG/NTS/BCAS3/PAWR	7
BP	GO:0042471	ear morphogenesis	6/575	119/16266	0.24506	0.889596	COL11A1/FGFR2/EYA1/GATA3/TMIE/FGF3	6
BP	GO:1901659	glycosyl compound biosynthetic process	6/575	119/16266	0.24506	0.889596	ATP6V0A4/AK9/CDA/GMPS/NME9/ADSL	6
BP	GO:0042991	transcription factor import into nucleus	5/575	95/16266	0.245543	0.889596	CYLD/CD36/EDA/SPHK1/LITAF	5
BP	GO:0000722	telomere maintenance via recombination	2/575	27/16266	0.247117	0.889596	RPA3/DNA2	2
BP	GO:0006376	mRNA splice site selection	2/575	27/16266	0.247117	0.889596	LUC7L3/SLU7	2
BP	GO:0006735	NADH regeneration	2/575	27/16266	0.247117	0.889596	GCK/ENO2	2
BP	GO:0006760	folic acid-containing compound metabolic process	2/575	27/16266	0.247117	0.889596	ALDH1L1/MTHFD2L	2
BP	GO:0033006	regulation of mast cell activation involved in immune response	2/575	27/16266	0.247117	0.889596	C12orf4/STXBP2	2
BP	GO:0036296	response to increased oxygen levels	2/575	27/16266	0.247117	0.889596	NCF2/PPARG	2
BP	GO:0042346	positive regulation of NF-kappaB import into nucleus	2/575	27/16266	0.247117	0.889596	EDA/SPHK1	2
BP	GO:0043304	regulation of mast cell degranulation	2/575	27/16266	0.247117	0.889596	C12orf4/STXBP2	2
BP	GO:0045601	regulation of endothelial cell differentiation	2/575	27/16266	0.247117	0.889596	TNFRSF1A/CTNNB1	2
BP	GO:0045730	respiratory burst	2/575	27/16266	0.247117	0.889596	NCF2/PRDX2	2
BP	GO:0046466	membrane lipid catabolic process	2/575	27/16266	0.247117	0.889596	ACER1/SPHK1	2
BP	GO:0055093	response to hyperoxia	2/575	27/16266	0.247117	0.889596	NCF2/PPARG	2
BP	GO:0061615	glycolytic process through fructose-6-phosphate	2/575	27/16266	0.247117	0.889596	GCK/ENO2	2
BP	GO:0061620	glycolytic process through glucose-6-phosphate	2/575	27/16266	0.247117	0.889596	GCK/ENO2	2
BP	GO:0061621	canonical glycolysis	2/575	27/16266	0.247117	0.889596	GCK/ENO2	2
BP	GO:0061718	glucose catabolic process to pyruvate	2/575	27/16266	0.247117	0.889596	GCK/ENO2	2
BP	GO:1902622	regulation of neutrophil migration	2/575	27/16266	0.247117	0.889596	ADAM8/PAWR	2
BP	GO:0006470	protein dephosphorylation	14/575	321/16266	0.247206	0.889596	PPP1R12A/WNK1/MEF2C/EYA1/PPP2R1A/EPM2A/PPP1R7/PPP2R4/PTPRE/SYTL2/PAWR/PP2D1/MAGI2/SEMA4D	14
BP	GO:1904589	regulation of protein import	8/575	169/16266	0.249125	0.889596	WWTR1/CYLD/CD36/EDA/AXIN2/SPHK1/APOD/LITAF	8
BP	GO:0003044	regulation of systemic arterial blood pressure mediated by a chemical signal	3/575	49/16266	0.249837	0.889596	SOD2/PDE4D/ADRA1D	3
BP	GO:0006195	purine nucleotide catabolic process	3/575	49/16266	0.249837	0.889596	PDE4A/PDE4D/GNB2L1	3
BP	GO:0009066	aspartate family amino acid metabolic process	3/575	49/16266	0.249837	0.889596	PHGDH/SDSL/MTHFD2L	3
BP	GO:0030850	prostate gland development	3/575	49/16266	0.249837	0.889596	CD44/FGFR2/CTNNB1	3
BP	GO:0032418	lysosome localization	3/575	49/16266	0.249837	0.889596	C12orf4/STXBP2/VPS33B	3
BP	GO:0010639	negative regulation of organelle organization	13/575	296/16266	0.249902	0.889596	PHF23/FGFR2/CLASP1/SCFD1/ACD/STMN2/GMFG/FHOD3/TBCD/CHEK1/TWF1/CLASP2/PARL	13
BP	GO:0006998	nuclear envelope organization	4/575	72/16266	0.250079	0.889596	PPP2R1A/SUMO1/NUP85/LEMD2	4
BP	GO:0060759	regulation of response to cytokine stimulus	6/575	120/16266	0.250964	0.889596	SUMO1/TRIM6/PPARG/MAP2K5/SPHK1/SLIT3	6
BP	GO:0001933	negative regulation of protein phosphorylation	15/575	348/16266	0.2512	0.889596	WWTR1/WNK1/TSC2/PPP2R1A/FKTN/CORO1C/PDE4D/RGS4/TNFAIP3/GMFG/UCHL1/LEMD2/SEMA4D/PRKAR1B/GNB2L1	15
BP	GO:0018958	phenol-containing compound metabolic process	5/575	96/16266	0.252202	0.889596	SNCAIP/GATA3/LRTOMT/SULT1A1/DIO2	5
BP	GO:0060193	positive regulation of lipase activity	5/575	96/16266	0.252202	0.889596	FGFR2/PLCB2/RHOC/NMUR1/PRKAR1B	5
BP	GO:0006805	xenobiotic metabolic process	8/575	170/16266	0.254075	0.889596	MGST1/FMO1/TBXAS1/ACSM2B/SULT2A1/CYP27B1/CYP4F22/SULT1A1	8
BP	GO:0009746	response to hexose	8/575	170/16266	0.254075	0.889596	NOX4/GCK/RPS6KB1/NCF2/ACVR1C/ILDR2/TCF7L2/GNB2L1	8
BP	GO:0006006	glucose metabolic process	10/575	221/16266	0.25673	0.889596	PCK2/GCK/ENO2/EPM2A/NR3C1/PHKG2/DCXR/PC/C1QTNF1/APOD	10
BP	GO:0034766	negative regulation of ion transmembrane transport	4/575	73/16266	0.257865	0.889596	GNB5/SUMO1/PAWR/MRLN	4
BP	GO:0043044	ATP-dependent chromatin remodeling	4/575	73/16266	0.257865	0.889596	SMARCE1/SMARCA4/STRA13/RUVBL1	4
BP	GO:0048663	neuron fate commitment	4/575	73/16266	0.257865	0.889596	EYA1/LHX3/DBX1/FOXN4	4
BP	GO:0010959	regulation of metal ion transport	14/575	324/16266	0.25789	0.889596	GNB5/FXYD5/CAPN3/TSPO/SGK3/GCK/PDE4D/SUMO1/SGK1/ANK2/BEST1/CTNNB1/PAWR/MRLN	14
BP	GO:0043254	regulation of protein complex assembly	14/575	324/16266	0.25789	0.889596	CLASP1/KIF9/STMN2/SUMO1/GMFG/FHOD3/PEX5/TBCD/MMP3/TWF1/CLASP2/CTNNB1/ATF7IP/GNB2L1	14
BP	GO:0005978	glycogen biosynthetic process	3/575	50/16266	0.259419	0.889596	GCK/EPM2A/PHKG2	3
BP	GO:0006213	pyrimidine nucleoside metabolic process	3/575	50/16266	0.259419	0.889596	AGXT2/CDA/NME9	3
BP	GO:0009250	glucan biosynthetic process	3/575	50/16266	0.259419	0.889596	GCK/EPM2A/PHKG2	3
BP	GO:0032663	regulation of interleukin-2 production	3/575	50/16266	0.259419	0.889596	GATA3/PDE4D/TNFAIP3	3
BP	GO:0046148	pigment biosynthetic process	3/575	50/16266	0.259419	0.889596	SLC25A39/TSPO/GMPS	3
BP	GO:0070265	necrotic cell death	3/575	50/16266	0.259419	0.889596	HEBP2/CYLD/TSPO	3
BP	GO:0000002	mitochondrial genome maintenance	2/575	28/16266	0.260364	0.889596	MEF2A/DNA2	2
BP	GO:0000188	inactivation of MAPK activity	2/575	28/16266	0.260364	0.889596	PPP2R1A/RGS4	2
BP	GO:0002832	negative regulation of response to biotic stimulus	2/575	28/16266	0.260364	0.889596	TNFAIP3/PRDX2	2
BP	GO:0009812	flavonoid metabolic process	2/575	28/16266	0.260364	0.889596	POR/SULT1A1	2
BP	GO:0010743	regulation of macrophage derived foam cell differentiation	2/575	28/16266	0.260364	0.889596	PPARG/CD36	2
BP	GO:0031440	regulation of mRNA 3'-end processing	2/575	28/16266	0.260364	0.889596	BARD1/RNF20	2
BP	GO:0034698	response to gonadotropin	2/575	28/16266	0.260364	0.889596	POR/PAWR	2
BP	GO:0048713	regulation of oligodendrocyte differentiation	2/575	28/16266	0.260364	0.889596	PPARG/CTNNB1	2
BP	GO:0090075	relaxation of muscle	2/575	28/16266	0.260364	0.889596	PDE4D/PAWR	2
BP	GO:0006486	protein glycosylation	13/575	299/16266	0.261096	0.889596	ST3GAL6/FKTN/GCNT2/ST3GAL5/B4GALT4/GALNT8/GBGT1/SLC35A1/B3GALNT1/MUC17/MUC13/ST8SIA3/MUC1	13
BP	GO:0043413	macromolecule glycosylation	13/575	299/16266	0.261096	0.889596	ST3GAL6/FKTN/GCNT2/ST3GAL5/B4GALT4/GALNT8/GBGT1/SLC35A1/B3GALNT1/MUC17/MUC13/ST8SIA3/MUC1	13
BP	GO:0006909	phagocytosis	9/575	197/16266	0.262901	0.889596	CYFIP2/SCFD1/TYRO3/CORO1C/PPARG/CD36/PAK1/PLA2G6/GNB2L1	9
BP	GO:0000187	activation of MAPK activity	7/575	147/16266	0.264252	0.889596	MAPK10/MAP2K5/ADAM8/GRM1/PRDX2/ERCC6/IKBKG	7
BP	GO:0010950	positive regulation of endopeptidase activity	7/575	147/16266	0.264252	0.889596	CYFIP2/ACVR1C/PSME3/PPARG/CRADD/PAWR/GNB2L1	7
BP	GO:0043687	post-translational protein modification	14/575	326/16266	0.265105	0.889596	ST3GAL6/STAG2/ST3GAL5/SUMO1/B4GALT4/NUP85/GALNT8/SLC35A1/MUC17/CRTAP/MUC13/ST8SIA3/MUC1/PIGN	14
BP	GO:0000045	autophagosome assembly	4/575	74/16266	0.265699	0.889596	PHF23/ATG16L1/SCFD1/WDR45	4
BP	GO:0031503	protein complex localization	4/575	74/16266	0.265699	0.889596	CYLD/EDA/SPHK1/LITAF	4
BP	GO:1901607	alpha-amino acid biosynthetic process	4/575	74/16266	0.265699	0.889596	PHGDH/AGXT2/GLS2/MTHFD2L	4
BP	GO:0003407	neural retina development	3/575	51/16266	0.269049	0.889596	SMARCA4/FOXN4/GPM6A	3
BP	GO:0009206	purine ribonucleoside triphosphate biosynthetic process	3/575	51/16266	0.269049	0.889596	ATP6V0A4/AK9/NME9	3
BP	GO:0009948	anterior/posterior axis specification	3/575	51/16266	0.269049	0.889596	WLS/T/CTNNB1	3
BP	GO:0048661	positive regulation of smooth muscle cell proliferation	3/575	51/16266	0.269049	0.889596	FGFR2/RPS6KB1/PDE4D	3
BP	GO:0050863	regulation of T cell activation	12/575	276/16266	0.272156	0.889596	CYLD/GATA3/MAPKAP1/BTN2A2/IL36B/ZC3H8/PAK1/ADAM8/NFKBID/PRDX2/CTNNB1/PAWR	12
BP	GO:0090257	regulation of muscle system process	9/575	199/16266	0.2723	0.889596	RPS6KB1/NMU/MYL2/PDE4D/SUMO1/ANK2/ADRA1D/SPHK1/PAWR	9
BP	GO:0031929	TOR signaling	4/575	75/16266	0.273575	0.889596	TSC2/GATA3/RPS6KB1/LAMTOR2	4
BP	GO:0006911	phagocytosis, engulfment	2/575	29/16266	0.273616	0.889596	PPARG/CD36	2
BP	GO:0009394	2'-deoxyribonucleotide metabolic process	2/575	29/16266	0.273616	0.889596	NEIL1/AK9	2
BP	GO:0014808	release of sequestered calcium ion into cytosol by sarcoplasmic reticulum	2/575	29/16266	0.273616	0.889596	PDE4D/ANK2	2
BP	GO:0031062	positive regulation of histone methylation	2/575	29/16266	0.273616	0.889596	RNF20/CTNNB1	2
BP	GO:0042168	heme metabolic process	2/575	29/16266	0.273616	0.889596	SLC25A39/TSPO	2
BP	GO:0046825	regulation of protein export from nucleus	2/575	29/16266	0.273616	0.889596	BARD1/TCF7L2	2
BP	GO:0051180	vitamin transport	2/575	29/16266	0.273616	0.889596	FOLR3/STRA6	2
BP	GO:0051646	mitochondrion localization	2/575	29/16266	0.273616	0.889596	MEF2A/CLUH	2
BP	GO:0060612	adipose tissue development	2/575	29/16266	0.273616	0.889596	ACAT1/DYRK1B	2
BP	GO:0060740	prostate gland epithelium morphogenesis	2/575	29/16266	0.273616	0.889596	CD44/FGFR2	2
BP	GO:0061036	positive regulation of cartilage development	2/575	29/16266	0.273616	0.889596	SOX6/POR	2
BP	GO:0070741	response to interleukin-6	2/575	29/16266	0.273616	0.889596	ST3GAL6/SELPLG	2
BP	GO:0098586	cellular response to virus	2/575	29/16266	0.273616	0.889596	ANKRD17/PUM1	2
BP	GO:1901021	positive regulation of calcium ion transmembrane transporter activity	2/575	29/16266	0.273616	0.889596	SUMO1/ANK2	2
BP	GO:1903514	calcium ion transport from endoplasmic reticulum to cytosol	2/575	29/16266	0.273616	0.889596	PDE4D/ANK2	2
BP	GO:1904427	positive regulation of calcium ion transmembrane transport	2/575	29/16266	0.273616	0.889596	SUMO1/ANK2	2
BP	GO:2000785	regulation of autophagosome assembly	2/575	29/16266	0.273616	0.889596	PHF23/SCFD1	2
BP	GO:0007584	response to nutrient	8/575	174/16266	0.274169	0.889596	TSPO/RPS6KB1/CYP27B1/POR/PPARG/PAWR/LTC4S/ADSL	8
BP	GO:0071466	cellular response to xenobiotic stimulus	8/575	174/16266	0.274169	0.889596	MGST1/FMO1/TBXAS1/ACSM2B/SULT2A1/CYP27B1/CYP4F22/SULT1A1	8
BP	GO:0006997	nucleus organization	6/575	124/16266	0.274955	0.889596	PPP2R1A/SUMO1/NUP85/SYNE1/LEMD2/CHMP6	6
BP	GO:0007586	digestion	7/575	149/16266	0.275221	0.889596	SULT2A1/NMU/SGK1/MOGAT2/MUC13/PAWR/SLC22A5	7
BP	GO:0051147	regulation of muscle cell differentiation	7/575	149/16266	0.275221	0.889596	HDAC9/FGFR2/MEF2A/MEF2C/CAPN3/ANKRD17/CTNNB1	7
BP	GO:0030098	lymphocyte differentiation	13/575	303/16266	0.27629	0.889596	HDAC9/CYLD/TYRO3/GATA3/PAX1/IL36B/ZC3H8/ADAM8/NFKBID/PRDX2/CTNNB1/RAG2/FZD9	13
BP	GO:0051650	establishment of vesicle localization	9/575	200/16266	0.277037	0.889596	FGFR2/CLASP1/RIMS1/ARFGAP1/SYTL2/CACFD1/CLASP2/CTNNB1/IKBKG	9
BP	GO:0006749	glutathione metabolic process	3/575	52/16266	0.278718	0.889596	MGST1/HAGH/NAT8	3
BP	GO:0009145	purine nucleoside triphosphate biosynthetic process	3/575	52/16266	0.278718	0.889596	ATP6V0A4/AK9/NME9	3
BP	GO:0014855	striated muscle cell proliferation	3/575	52/16266	0.278718	0.889596	FGFR2/MEF2C/KCNK2	3
BP	GO:0045576	mast cell activation	3/575	52/16266	0.278718	0.889596	C12orf4/STXBP2/PTPRE	3
BP	GO:0055078	sodium ion homeostasis	3/575	52/16266	0.278718	0.889596	ATP12A/SGK3/SGK1	3
BP	GO:0009166	nucleotide catabolic process	5/575	100/16266	0.279253	0.889596	PDE4A/GCK/PDE4D/NEIL1/GNB2L1	5
BP	GO:0097306	cellular response to alcohol	5/575	100/16266	0.279253	0.889596	CYP27B1/NTS/LRP8/CTNNB1/PAWR	5
BP	GO:0034284	response to monosaccharide	8/575	175/16266	0.279261	0.889596	NOX4/GCK/RPS6KB1/NCF2/ACVR1C/ILDR2/TCF7L2/GNB2L1	8
BP	GO:0002429	immune response-activating cell surface receptor signaling pathway	13/575	304/16266	0.280134	0.889596	BTN3A1/CYFIP2/MEF2C/GATA3/PDE4D/PSME3/CMTM3/PAK1/GCSAM/PAWR/PLA2G6/CLEC6A/IKBKG	13
BP	GO:0006941	striated muscle contraction	6/575	125/16266	0.281037	0.889596	MYH14/RPS6KB1/MYL2/PDE4D/SUMO1/ANK2	6
BP	GO:0051262	protein tetramerization	6/575	125/16266	0.281037	0.889596	SOD2/CNGA4/PEX5/CDA/DCXR/ADSL	6
BP	GO:0018107	peptidyl-threonine phosphorylation	4/575	76/16266	0.28149	0.889596	WNK1/TRIM6/CHEK1/SPHK1	4
BP	GO:0072078	nephron tubule morphogenesis	4/575	76/16266	0.28149	0.889596	CD44/EYA1/GATA3/CTNNB1	4
BP	GO:0072527	pyrimidine-containing compound metabolic process	4/575	76/16266	0.28149	0.889596	AGXT2/NEIL1/CDA/NME9	4
BP	GO:0070486	leukocyte aggregation	18/575	436/16266	0.282422	0.889596	CD44/BTN3A1/CYLD/GATA3/MAPKAP1/BTN2A2/PAX1/IL36B/ZC3H8/PAK1/ADAM8/NCSTN/NFKBID/PRDX2/CTNNB1/RAG2/PAWR/SEMA4D	18
BP	GO:0060828	regulation of canonical Wnt signaling pathway	10/575	227/16266	0.283289	0.889596	WWTR1/FGFR2/CYLD/USP34/WLS/PSME3/TCF7L2/EDA/CTNNB1/AXIN2	10
BP	GO:0006913	nucleocytoplasmic transport	17/575	410/16266	0.283813	0.889596	WWTR1/PPP1R12A/CYLD/TSC2/FYTTD1/NSRP1/CD36/BARD1/TCF7L2/SMG1/EDA/AXIN2/XPO6/SPHK1/APOD/LITAF/CCHCR1	17
BP	GO:0001657	ureteric bud development	5/575	101/16266	0.286107	0.889596	CD44/FGFR2/EYA1/GATA3/CTNNB1	5
BP	GO:0010608	posttranscriptional regulation of gene expression	15/575	358/16266	0.286216	0.889596	CIRBP/RPS6KB1/GCNT2/EIF3G/PIWIL4/PUM1/GRB7/EIF3H/RPS3/AXIN2/NLRP5/RPS6KA3/BRF1/GNB2L1/DIO2	15
BP	GO:0000381	regulation of alternative mRNA splicing, via spliceosome	2/575	30/16266	0.286857	0.889596	RBM25/NSRP1	2
BP	GO:0001702	gastrulation with mouth forming second	2/575	30/16266	0.286857	0.889596	T/CTNNB1	2
BP	GO:0031069	hair follicle morphogenesis	2/575	30/16266	0.286857	0.889596	FGFR2/CTNNB1	2
BP	GO:0042755	eating behavior	2/575	30/16266	0.286857	0.889596	NMU/UCHL1	2
BP	GO:0046134	pyrimidine nucleoside biosynthetic process	2/575	30/16266	0.286857	0.889596	CDA/NME9	2
BP	GO:0050686	negative regulation of mRNA processing	2/575	30/16266	0.286857	0.889596	BARD1/RNF20	2
BP	GO:0060479	lung cell differentiation	2/575	30/16266	0.286857	0.889596	EYA1/CTNNB1	2
BP	GO:0071391	cellular response to estrogen stimulus	2/575	30/16266	0.286857	0.889596	BCAS3/PAWR	2
BP	GO:1903053	regulation of extracellular matrix organization	2/575	30/16266	0.286857	0.889596	CLASP1/CLASP2	2
BP	GO:1903202	negative regulation of oxidative stress-induced cell death	2/575	30/16266	0.286857	0.889596	SOD2/GNB2L1	2
BP	GO:2000249	regulation of actin cytoskeleton reorganization	2/575	30/16266	0.286857	0.889596	GMFG/BCAS3	2
BP	GO:0097479	synaptic vesicle localization	6/575	126/16266	0.287149	0.889596	FGFR2/RIMS1/SYTL2/CACFD1/CTNNB1/MAGI2	6
BP	GO:0051348	negative regulation of transferase activity	14/575	332/16266	0.287161	0.889596	WWTR1/WNK1/TSC2/PPP2R1A/CORO1C/RGS4/TNFAIP3/GMFG/PSME3/PPARG/UCHL1/PRKAR1B/GNB2L1/CERS1	14
BP	GO:0070085	glycosylation	13/575	306/16266	0.287871	0.889596	ST3GAL6/FKTN/GCNT2/ST3GAL5/B4GALT4/GALNT8/GBGT1/SLC35A1/B3GALNT1/MUC17/MUC13/ST8SIA3/MUC1	13
BP	GO:0072001	renal system development	12/575	280/16266	0.288281	0.889596	DCN/WWTR1/CD44/FGFR2/ACAT1/MEF2C/EYA1/GATA3/STRA6/CTNNB1/MTSS1/MAGI2	12
BP	GO:0048546	digestive tract morphogenesis	3/575	53/16266	0.288419	0.889596	FGFR2/STRA6/CTNNB1	3
BP	GO:0070830	bicellular tight junction assembly	3/575	53/16266	0.288419	0.889596	INADL/TBCD/CLDN14	3
BP	GO:0006885	regulation of pH	4/575	77/16266	0.28944	0.889596	ATP12A/SLC4A11/ATP6V0A4/SLC9A6	4
BP	GO:0014013	regulation of gliogenesis	4/575	77/16266	0.28944	0.889596	TSPO/GFAP/PPARG/CTNNB1	4
BP	GO:0030574	collagen catabolic process	4/575	77/16266	0.28944	0.889596	COL11A1/COL4A2/MMP3/COL25A1	4
BP	GO:0035308	negative regulation of protein dephosphorylation	4/575	77/16266	0.28944	0.889596	WNK1/PPP2R4/SYTL2/SEMA4D	4
BP	GO:0048709	oligodendrocyte differentiation	4/575	77/16266	0.28944	0.889596	SOX6/PPARG/TSPAN2/CTNNB1	4
BP	GO:0097164	ammonium ion metabolic process	8/575	177/16266	0.28952	0.889596	SPHK2/SNCAIP/POR/PLB1/ACER1/SPHK1/PLA2G6/SLC22A5	8
BP	GO:0010770	positive regulation of cell morphogenesis involved in differentiation	7/575	152/16266	0.291888	0.889596	WWTR1/GCNT2/TCF7L2/LRP8/CTNNB1/AXIN2/SEMA4D	7
BP	GO:0050679	positive regulation of epithelial cell proliferation	7/575	152/16266	0.291888	0.889596	FGFR2/EYA1/TNFAIP3/NR4A1/FOXP2/MAP2K5/CTNNB1	7
BP	GO:0043405	regulation of MAP kinase activity	12/575	281/16266	0.292356	0.889596	NOX4/PPP2R1A/MAPK10/RGS4/MAP2K5/PAK1/ADAM8/GRM1/UCHL1/PRDX2/ERCC6/IKBKG	12
BP	GO:0003206	cardiac chamber morphogenesis	5/575	102/16266	0.292992	0.889596	COL11A1/FGFR2/MEF2C/GATA3/MYL2	5
BP	GO:0072163	mesonephric epithelium development	5/575	102/16266	0.292992	0.889596	CD44/FGFR2/EYA1/GATA3/CTNNB1	5
BP	GO:0072164	mesonephric tubule development	5/575	102/16266	0.292992	0.889596	CD44/FGFR2/EYA1/GATA3/CTNNB1	5
BP	GO:0097202	activation of cysteine-type endopeptidase activity	5/575	102/16266	0.292992	0.889596	CYFIP2/PPARG/CRADD/PAWR/GNB2L1	5
BP	GO:0051092	positive regulation of NF-kappaB transcription factor activity	6/575	127/16266	0.29329	0.889596	CAPN3/RPS3/ADAM8/EDA/SPHK1/IKBKG	6
BP	GO:0007159	leukocyte cell-cell adhesion	19/575	466/16266	0.29353	0.889596	CD44/BTN3A1/CYLD/GATA3/SELPLG/MAPKAP1/BTN2A2/PAX1/IL36B/ZC3H8/PAK1/ADAM8/NCSTN/NFKBID/PRDX2/CTNNB1/RAG2/PAWR/SEMA4D	19
BP	GO:0016358	dendrite development	8/575	178/16266	0.294685	0.889596	MEF2A/MEF2C/KLF7/PAK1/GRIP1/LRP8/SEMA4D/SLC9A6	8
BP	GO:0007018	microtubule-based movement	9/575	204/16266	0.296209	0.889596	MAP4/KIF22/KIF9/KIFC3/UCHL1/RPGR/HYDIN/DNAH14/DYNC1H1	9
BP	GO:0048193	Golgi vesicle transport	11/575	256/16266	0.296881	0.889596	SCFD1/VTI1B/ARFGAP1/COG4/SH3D19/SEC22A/PUM1/STEAP2/VPS13A/GNB2L1/CORO7	11
BP	GO:0018205	peptidyl-lysine modification	15/575	361/16266	0.297019	0.889596	HDAC9/CAPN3/STAG2/EYA1/GATA3/EZH1/SUMO1/NUP85/POR/NAT8/CHEK1/CXXC1/CTNNB1/RUVBL1/MUC1	15
BP	GO:0019218	regulation of steroid metabolic process	4/575	78/16266	0.29742	0.889596	TSPO/CYP27B1/NR3C1/POR	4
BP	GO:0035249	synaptic transmission, glutamatergic	4/575	78/16266	0.29742	0.889596	MEF2C/PAK1/GRM1/GRM2	4
BP	GO:0070613	regulation of protein processing	4/575	78/16266	0.29742	0.889596	SUSD4/ADAM8/CLEC3B/CCBE1	4
BP	GO:0072088	nephron epithelium morphogenesis	4/575	78/16266	0.29742	0.889596	CD44/EYA1/GATA3/CTNNB1	4
BP	GO:0048639	positive regulation of developmental growth	7/575	153/16266	0.297494	0.889596	FGFR2/RIMS1/MEF2C/CAPN3/RPS6KB1/RAG2/SEMA4D	7
BP	GO:0007405	neuroblast proliferation	3/575	54/16266	0.298145	0.889596	FGFR2/CTNNB1/FZD9	3
BP	GO:0010171	body morphogenesis	3/575	54/16266	0.298145	0.889596	CLASP1/STRA6/CLASP2	3
BP	GO:0051881	regulation of mitochondrial membrane potential	3/575	54/16266	0.298145	0.889596	HEBP2/TSPO/GNB2L1	3
BP	GO:0055013	cardiac muscle cell development	3/575	54/16266	0.298145	0.889596	MEF2A/MYL2/FHOD3	3
BP	GO:0090183	regulation of kidney development	3/575	54/16266	0.298145	0.889596	WWTR1/GATA3/CTNNB1	3
BP	GO:0021510	spinal cord development	5/575	103/16266	0.299905	0.889596	PHGDH/LHX3/DBX1/FOXN4/PLXDC1	5
BP	GO:0002686	negative regulation of leukocyte migration	2/575	31/16266	0.300071	0.889596	GCSAM/APOD	2
BP	GO:0010259	multicellular organismal aging	2/575	31/16266	0.300071	0.889596	SLC1A2/MSH6	2
BP	GO:0010453	regulation of cell fate commitment	2/575	31/16266	0.300071	0.889596	FGFR2/CTNNB1	2
BP	GO:0010742	macrophage derived foam cell differentiation	2/575	31/16266	0.300071	0.889596	PPARG/CD36	2
BP	GO:0017145	stem cell division	2/575	31/16266	0.300071	0.889596	WWTR1/FGFR2	2
BP	GO:0019692	deoxyribose phosphate metabolic process	2/575	31/16266	0.300071	0.889596	NEIL1/AK9	2
BP	GO:0030866	cortical actin cytoskeleton organization	2/575	31/16266	0.300071	0.889596	EPB41L2/EPB41	2
BP	GO:0043489	RNA stabilization	2/575	31/16266	0.300071	0.889596	CIRBP/AXIN2	2
BP	GO:0044091	membrane biogenesis	2/575	31/16266	0.300071	0.889596	PEX11A/MAGI2	2
BP	GO:0048255	mRNA stabilization	2/575	31/16266	0.300071	0.889596	CIRBP/AXIN2	2
BP	GO:0050650	chondroitin sulfate proteoglycan biosynthetic process	2/575	31/16266	0.300071	0.889596	DCN/XYLT2	2
BP	GO:0060512	prostate gland morphogenesis	2/575	31/16266	0.300071	0.889596	CD44/FGFR2	2
BP	GO:0090077	foam cell differentiation	2/575	31/16266	0.300071	0.889596	PPARG/CD36	2
BP	GO:2000142	regulation of DNA-templated transcription, initiation	2/575	31/16266	0.300071	0.889596	CTNNB1/ATF7IP	2
BP	GO:0051169	nuclear transport	17/575	415/16266	0.30063	0.889596	WWTR1/PPP1R12A/CYLD/TSC2/FYTTD1/NSRP1/CD36/BARD1/TCF7L2/SMG1/EDA/AXIN2/XPO6/SPHK1/APOD/LITAF/CCHCR1	17
BP	GO:0051249	regulation of lymphocyte activation	15/575	362/16266	0.300648	0.889596	MEF2C/CYLD/TYRO3/GATA3/TNFAIP3/MAPKAP1/BTN2A2/IL36B/ZC3H8/PAK1/ADAM8/NFKBID/PRDX2/CTNNB1/PAWR	15
BP	GO:0050731	positive regulation of peptidyl-tyrosine phosphorylation	7/575	154/16266	0.303124	0.889596	CD44/TNFRSF1A/CD36/LRP8/TNFRSF18/SEMA4D/ERCC6	7
BP	GO:1901654	response to ketone	7/575	154/16266	0.303124	0.889596	TSPO/RPS6KB1/NCF2/PPARG/NTS/P2RY6/SLIT3	7
BP	GO:0009410	response to xenobiotic stimulus	8/575	180/16266	0.305079	0.889596	MGST1/FMO1/TBXAS1/ACSM2B/SULT2A1/CYP27B1/CYP4F22/SULT1A1	8
BP	GO:0009156	ribonucleoside monophosphate biosynthetic process	4/575	79/16266	0.305427	0.889596	ATP6V0A4/AK9/GMPS/ADSL	4
BP	GO:0035305	negative regulation of dephosphorylation	4/575	79/16266	0.305427	0.889596	WNK1/PPP2R4/SYTL2/SEMA4D	4
BP	GO:0045055	regulated secretory pathway	4/575	79/16266	0.305427	0.889596	C12orf4/STXBP2/RIMS1/STEAP2	4
BP	GO:1903317	regulation of protein maturation	4/575	79/16266	0.305427	0.889596	SUSD4/ADAM8/CLEC3B/CCBE1	4
BP	GO:0001838	embryonic epithelial tube formation	6/575	129/16266	0.305648	0.889596	TSC2/GATA3/T/CTNNB1/SEMA4C/TGIF1	6
BP	GO:0031638	zymogen activation	6/575	129/16266	0.305648	0.889596	CYFIP2/PPARG/CLEC3B/CRADD/PAWR/GNB2L1	6
BP	GO:0044801	single-organism membrane fusion	6/575	129/16266	0.305648	0.889596	PHF23/VTI1B/SEC22A/USP30/IZUMO1/SERPINA5	6
BP	GO:0021987	cerebral cortex development	5/575	104/16266	0.306844	0.889596	FOXP2/MCPH1/LRP8/CTNNB1/ADGRG1	5
BP	GO:0006383	transcription from RNA polymerase III promoter	3/575	55/16266	0.307888	0.889596	IVNS1ABP/ZC3H8/BRF1	3
BP	GO:0032768	regulation of monooxygenase activity	3/575	55/16266	0.307888	0.889596	CYP27B1/POR/PTS	3
BP	GO:0055008	cardiac muscle tissue morphogenesis	3/575	55/16266	0.307888	0.889596	COL11A1/FGFR2/MYL2	3
BP	GO:0055017	cardiac muscle tissue growth	3/575	55/16266	0.307888	0.889596	FGFR2/MEF2C/KCNK2	3
BP	GO:0072523	purine-containing compound catabolic process	3/575	55/16266	0.307888	0.889596	PDE4A/PDE4D/GNB2L1	3
BP	GO:0007269	neurotransmitter secretion	7/575	155/16266	0.308775	0.889596	SNCAIP/RIMS1/MEF2C/SLC1A2/GLS2/SYTL2/PAK1	7
BP	GO:0034109	homotypic cell-cell adhesion	20/575	498/16266	0.310258	0.889596	CD44/BTN3A1/CYLD/TYRO3/GATA3/MAPKAP1/BTN2A2/PAX1/IL36B/ZC3H8/PAK1/ADAM8/NCSTN/NFKBID/PRDX2/CTNNB1/C1QTNF1/RAG2/PAWR/SEMA4D	20
BP	GO:0043524	negative regulation of neuron apoptotic process	6/575	130/16266	0.311862	0.889596	MEF2C/TYRO3/SOD2/CHL1/ADAM8/NDNF	6
BP	GO:0072175	epithelial tube formation	6/575	130/16266	0.311862	0.889596	TSC2/GATA3/T/CTNNB1/SEMA4C/TGIF1	6
BP	GO:0001975	response to amphetamine	2/575	32/16266	0.313244	0.889596	HDAC9/NTS	2
BP	GO:0002720	positive regulation of cytokine production involved in immune response	2/575	32/16266	0.313244	0.889596	TRIM6/CD36	2
BP	GO:0006692	prostanoid metabolic process	2/575	32/16266	0.313244	0.889596	TBXAS1/TNFRSF1A	2
BP	GO:0006693	prostaglandin metabolic process	2/575	32/16266	0.313244	0.889596	TBXAS1/TNFRSF1A	2
BP	GO:0007205	protein kinase C-activating G-protein coupled receptor signaling pathway	2/575	32/16266	0.313244	0.889596	PRKD3/GRM1	2
BP	GO:0010939	regulation of necrotic cell death	2/575	32/16266	0.313244	0.889596	HEBP2/TSPO	2
BP	GO:0015988	energy coupled proton transmembrane transport, against electrochemical gradient	2/575	32/16266	0.313244	0.889596	ATP12A/ATP6V0A4	2
BP	GO:0015991	ATP hydrolysis coupled proton transport	2/575	32/16266	0.313244	0.889596	ATP12A/ATP6V0A4	2
BP	GO:0031128	developmental induction	2/575	32/16266	0.313244	0.889596	CTNNB1/FGF3	2
BP	GO:0032105	negative regulation of response to extracellular stimulus	2/575	32/16266	0.313244	0.889596	PHF23/SCFD1	2
BP	GO:0032108	negative regulation of response to nutrient levels	2/575	32/16266	0.313244	0.889596	PHF23/SCFD1	2
BP	GO:0034694	response to prostaglandin	2/575	32/16266	0.313244	0.889596	PPARG/P2RY6	2
BP	GO:0035088	establishment or maintenance of apical/basal cell polarity	2/575	32/16266	0.313244	0.889596	EYA1/ERBB2IP	2
BP	GO:0042982	amyloid precursor protein metabolic process	2/575	32/16266	0.313244	0.889596	NCSTN/PAWR	2
BP	GO:0045124	regulation of bone resorption	2/575	32/16266	0.313244	0.889596	TNFAIP3/ADAM8	2
BP	GO:0045214	sarcomere organization	2/575	32/16266	0.313244	0.889596	CAPN3/LDB3	2
BP	GO:0046131	pyrimidine ribonucleoside metabolic process	2/575	32/16266	0.313244	0.889596	CDA/NME9	2
BP	GO:0061245	establishment or maintenance of bipolar cell polarity	2/575	32/16266	0.313244	0.889596	EYA1/ERBB2IP	2
BP	GO:1900408	negative regulation of cellular response to oxidative stress	2/575	32/16266	0.313244	0.889596	SOD2/GNB2L1	2
BP	GO:1902883	negative regulation of response to oxidative stress	2/575	32/16266	0.313244	0.889596	SOD2/GNB2L1	2
BP	GO:1903523	negative regulation of blood circulation	2/575	32/16266	0.313244	0.889596	PDE4D/ADRA1D	2
BP	GO:2000677	regulation of transcription regulatory region DNA binding	2/575	32/16266	0.313244	0.889596	GATA3/TRIM6	2
BP	GO:0018210	peptidyl-threonine modification	4/575	80/16266	0.313456	0.889596	WNK1/TRIM6/CHEK1/SPHK1	4
BP	GO:0072028	nephron morphogenesis	4/575	80/16266	0.313456	0.889596	CD44/EYA1/GATA3/CTNNB1	4
BP	GO:0022412	cellular process involved in reproduction in multicellular organism	11/575	260/16266	0.31425	0.889596	SMARCA2/PPP2R1A/RPS6KB1/SLIRP/SMARCA4/FANCC/DDIAS/CTNNB1/IZUMO1/SLIT3/SERPINA5	11
BP	GO:0016485	protein processing	13/575	313/16266	0.315437	0.889596	CYFIP2/ERO1B/PPARG/CGA/SUSD4/ADAM8/NCSTN/CLEC3B/CRADD/PARL/PAWR/CCBE1/GNB2L1	13
BP	GO:0050730	regulation of peptidyl-tyrosine phosphorylation	9/575	208/16266	0.315701	0.889596	CD44/TNFRSF1A/PPP2R1A/CD36/LRP8/TNFRSF18/SEMA4D/GNB2L1/ERCC6	9
BP	GO:0001706	endoderm formation	3/575	56/16266	0.317643	0.889596	COL11A1/COL4A2/CTNNB1	3
BP	GO:0018149	peptide cross-linking	3/575	56/16266	0.317643	0.889596	DCN/NDNF/SPOCK3	3
BP	GO:0022029	telencephalon cell migration	3/575	56/16266	0.317643	0.889596	LRP8/CTNNB1/ADGRG1	3
BP	GO:0035265	organ growth	6/575	131/16266	0.318097	0.889596	FGFR2/MEF2C/KCNK2/COMP/POR/RAG2	6
BP	GO:0001823	mesonephros development	5/575	106/16266	0.320788	0.889596	CD44/FGFR2/EYA1/GATA3/CTNNB1	5
BP	GO:0035023	regulation of Rho protein signal transduction	5/575	106/16266	0.320788	0.889596	ARHGEF9/ARHGEF3/ARHGEF12/ADGRG1/ARHGEF25	5
BP	GO:0034763	negative regulation of transmembrane transport	4/575	81/16266	0.321504	0.889596	GNB5/SUMO1/PAWR/MRLN	4
BP	GO:1903409	reactive oxygen species biosynthetic process	4/575	81/16266	0.321504	0.889596	TSPO/AGXT2/TLR5/DDAH2	4
BP	GO:0006816	calcium ion transport	15/575	368/16266	0.322681	0.889596	CLCA1/GNB5/CAPN3/TSPO/CYP27B1/PDE4D/SUMO1/ANK2/GPM6A/CACFD1/BEST1/CTNNB1/NMUR1/PAWR/MRLN	15
BP	GO:0051186	cofactor metabolic process	14/575	342/16266	0.325098	0.889596	FMO1/SLC25A39/FAR2/IDH3G/COQ9/TSPO/GCK/ENO2/PCCB/ALDH1L1/PTS/MTHFD2L/DCXR/PC	14
BP	GO:0010952	positive regulation of peptidase activity	7/575	158/16266	0.325845	0.889596	CYFIP2/ACVR1C/PSME3/PPARG/CRADD/PAWR/GNB2L1	7
BP	GO:0016331	morphogenesis of embryonic epithelium	7/575	158/16266	0.325845	0.889596	FGFR2/TSC2/GATA3/T/CTNNB1/SEMA4C/TGIF1	7
BP	GO:0001662	behavioral fear response	2/575	33/16266	0.326362	0.889596	MEF2C/RPS6KB1	2
BP	GO:0002209	behavioral defense response	2/575	33/16266	0.326362	0.889596	MEF2C/RPS6KB1	2
BP	GO:0002532	production of molecular mediator involved in inflammatory response	2/575	33/16266	0.326362	0.889596	PRDX2/APOD	2
BP	GO:0006007	glucose catabolic process	2/575	33/16266	0.326362	0.889596	GCK/ENO2	2
BP	GO:0006206	pyrimidine nucleobase metabolic process	2/575	33/16266	0.326362	0.889596	AGXT2/CDA	2
BP	GO:0006506	GPI anchor biosynthetic process	2/575	33/16266	0.326362	0.889596	PGAP2/PIGN	2
BP	GO:0007080	mitotic metaphase plate congression	2/575	33/16266	0.326362	0.889596	KIF22/CHMP6	2
BP	GO:0010573	vascular endothelial growth factor production	2/575	33/16266	0.326362	0.889596	CCBE1/ADGRG1	2
BP	GO:0010907	positive regulation of glucose metabolic process	2/575	33/16266	0.326362	0.889596	GCK/PHKG2	2
BP	GO:0014014	negative regulation of gliogenesis	2/575	33/16266	0.326362	0.889596	TSPO/CTNNB1	2
BP	GO:0016486	peptide hormone processing	2/575	33/16266	0.326362	0.889596	ERO1B/CGA	2
BP	GO:0033574	response to testosterone	2/575	33/16266	0.326362	0.889596	TSPO/RPS6KB1	2
BP	GO:0035115	embryonic forelimb morphogenesis	2/575	33/16266	0.326362	0.889596	KIAA1715/CTNNB1	2
BP	GO:0043277	apoptotic cell clearance	2/575	33/16266	0.326362	0.889596	TYRO3/CD36	2
BP	GO:0050869	negative regulation of B cell activation	2/575	33/16266	0.326362	0.889596	TNFAIP3/PAWR	2
BP	GO:2001258	negative regulation of cation channel activity	2/575	33/16266	0.326362	0.889596	GNB5/SUMO1	2
BP	GO:0052548	regulation of endopeptidase activity	15/575	369/16266	0.326393	0.889596	CD44/CYFIP2/USP14/ACVR1C/POR/PSME3/PPARG/MAP2K5/ITIH3/CRADD/RPS6KA3/PAWR/SERPINA5/SPOCK3/GNB2L1	15
BP	GO:0000729	DNA double-strand break processing	1/575	11/16266	0.327001	0.889596	DNA2	1
BP	GO:0000730	DNA recombinase assembly	1/575	11/16266	0.327001	0.889596	RPA3	1
BP	GO:0002674	negative regulation of acute inflammatory response	1/575	11/16266	0.327001	0.889596	PPARG	1
BP	GO:0002923	regulation of humoral immune response mediated by circulating immunoglobulin	1/575	11/16266	0.327001	0.889596	SUSD4	1
BP	GO:0003306	Wnt signaling pathway involved in heart development	1/575	11/16266	0.327001	0.889596	CTNNB1	1
BP	GO:0003334	keratinocyte development	1/575	11/16266	0.327001	0.889596	PALLD	1
BP	GO:0006020	inositol metabolic process	1/575	11/16266	0.327001	0.889596	PPIP5K1	1
BP	GO:0006047	UDP-N-acetylglucosamine metabolic process	1/575	11/16266	0.327001	0.889596	SLC35A3	1
BP	GO:0006390	transcription from mitochondrial promoter	1/575	11/16266	0.327001	0.889596	MTERF4	1
BP	GO:0006558	L-phenylalanine metabolic process	1/575	11/16266	0.327001	0.889596	HPD	1
BP	GO:0006924	activation-induced cell death of T cells	1/575	11/16266	0.327001	0.889596	TSC22D3	1
BP	GO:0008655	pyrimidine-containing compound salvage	1/575	11/16266	0.327001	0.889596	CDA	1
BP	GO:0009071	serine family amino acid catabolic process	1/575	11/16266	0.327001	0.889596	SDSL	1
BP	GO:0009223	pyrimidine deoxyribonucleotide catabolic process	1/575	11/16266	0.327001	0.889596	NEIL1	1
BP	GO:0009396	folic acid-containing compound biosynthetic process	1/575	11/16266	0.327001	0.889596	MTHFD2L	1
BP	GO:0030011	maintenance of cell polarity	1/575	11/16266	0.327001	0.889596	DST	1
BP	GO:0032205	negative regulation of telomere maintenance	1/575	11/16266	0.327001	0.889596	ACD	1
BP	GO:0032460	negative regulation of protein oligomerization	1/575	11/16266	0.327001	0.889596	PEX5	1
BP	GO:0032988	ribonucleoprotein complex disassembly	1/575	11/16266	0.327001	0.889596	GFM2	1
BP	GO:0033145	positive regulation of intracellular steroid hormone receptor signaling pathway	1/575	11/16266	0.327001	0.889596	PAK1	1
BP	GO:0033327	Leydig cell differentiation	1/575	11/16266	0.327001	0.889596	MGST1	1
BP	GO:0034244	negative regulation of transcription elongation from RNA polymerase II promoter	1/575	11/16266	0.327001	0.889596	RECQL5	1
BP	GO:0036376	sodium ion export from cell	1/575	11/16266	0.327001	0.889596	ATP12A	1
BP	GO:0036445	neuronal stem cell division	1/575	11/16266	0.327001	0.889596	FGFR2	1
BP	GO:0036475	neuron death in response to oxidative stress	1/575	11/16266	0.327001	0.889596	GNB2L1	1
BP	GO:0043097	pyrimidine nucleoside salvage	1/575	11/16266	0.327001	0.889596	CDA	1
BP	GO:0043312	neutrophil degranulation	1/575	11/16266	0.327001	0.889596	STXBP2	1
BP	GO:0044320	cellular response to leptin stimulus	1/575	11/16266	0.327001	0.889596	GCK	1
BP	GO:0045003	double-strand break repair via synthesis-dependent strand annealing	1/575	11/16266	0.327001	0.889596	RPA3	1
BP	GO:0045023	G0 to G1 transition	1/575	11/16266	0.327001	0.889596	RHNO1	1
BP	GO:0045721	negative regulation of gluconeogenesis	1/575	11/16266	0.327001	0.889596	GCK	1
BP	GO:0045738	negative regulation of DNA repair	1/575	11/16266	0.327001	0.889596	RPS3	1
BP	GO:0045760	positive regulation of action potential	1/575	11/16266	0.327001	0.889596	PAWR	1
BP	GO:0045779	negative regulation of bone resorption	1/575	11/16266	0.327001	0.889596	TNFAIP3	1
BP	GO:0046051	UTP metabolic process	1/575	11/16266	0.327001	0.889596	NME9	1
BP	GO:0046133	pyrimidine ribonucleoside catabolic process	1/575	11/16266	0.327001	0.889596	CDA	1
BP	GO:0046855	inositol phosphate dephosphorylation	1/575	11/16266	0.327001	0.889596	EPM2A	1
BP	GO:0048742	regulation of skeletal muscle fiber development	1/575	11/16266	0.327001	0.889596	HDAC9	1
BP	GO:0055057	neuroblast division	1/575	11/16266	0.327001	0.889596	FGFR2	1
BP	GO:0060379	cardiac muscle cell myoblast differentiation	1/575	11/16266	0.327001	0.889596	T	1
BP	GO:0060670	branching involved in labyrinthine layer morphogenesis	1/575	11/16266	0.327001	0.889596	FGFR2	1
BP	GO:0060736	prostate gland growth	1/575	11/16266	0.327001	0.889596	FGFR2	1
BP	GO:0060767	epithelial cell proliferation involved in prostate gland development	1/575	11/16266	0.327001	0.889596	CTNNB1	1
BP	GO:0061003	positive regulation of dendritic spine morphogenesis	1/575	11/16266	0.327001	0.889596	LRP8	1
BP	GO:0061029	eyelid development in camera-type eye	1/575	11/16266	0.327001	0.889596	STRA6	1
BP	GO:0061154	endothelial tube morphogenesis	1/575	11/16266	0.327001	0.889596	CTNNB1	1
BP	GO:0071107	response to parathyroid hormone	1/575	11/16266	0.327001	0.889596	MEF2C	1
BP	GO:0071257	cellular response to electrical stimulus	1/575	11/16266	0.327001	0.889596	GRM1	1
BP	GO:0071397	cellular response to cholesterol	1/575	11/16266	0.327001	0.889596	LRP8	1
BP	GO:0071872	cellular response to epinephrine stimulus	1/575	11/16266	0.327001	0.889596	PDE4D	1
BP	GO:0080184	response to phenylpropanoid	1/575	11/16266	0.327001	0.889596	CD36	1
BP	GO:0086014	atrial cardiac muscle cell action potential	1/575	11/16266	0.327001	0.889596	ANK2	1
BP	GO:0086026	atrial cardiac muscle cell to AV node cell signaling	1/575	11/16266	0.327001	0.889596	ANK2	1
BP	GO:0086066	atrial cardiac muscle cell to AV node cell communication	1/575	11/16266	0.327001	0.889596	ANK2	1
BP	GO:0090009	primitive streak formation	1/575	11/16266	0.327001	0.889596	T	1
BP	GO:0090399	replicative senescence	1/575	11/16266	0.327001	0.889596	CHEK1	1
BP	GO:0097286	iron ion import	1/575	11/16266	0.327001	0.889596	STEAP2	1
BP	GO:1900025	negative regulation of substrate adhesion-dependent cell spreading	1/575	11/16266	0.327001	0.889596	CORO1C	1
BP	GO:1900102	negative regulation of endoplasmic reticulum unfolded protein response	1/575	11/16266	0.327001	0.889596	GNB2L1	1
BP	GO:1900271	regulation of long-term synaptic potentiation	1/575	11/16266	0.327001	0.889596	PAK1	1
BP	GO:1901642	nucleoside transmembrane transport	1/575	11/16266	0.327001	0.889596	SLC29A4	1
BP	GO:1901722	regulation of cell proliferation involved in kidney development	1/575	11/16266	0.327001	0.889596	GATA3	1
BP	GO:1902221	erythrose 4-phosphate/phosphoenolpyruvate family amino acid metabolic process	1/575	11/16266	0.327001	0.889596	HPD	1
BP	GO:1902237	positive regulation of endoplasmic reticulum stress-induced intrinsic apoptotic signaling pathway	1/575	11/16266	0.327001	0.889596	SPOP	1
BP	GO:1902547	regulation of cellular response to vascular endothelial growth factor stimulus	1/575	11/16266	0.327001	0.889596	CCBE1	1
BP	GO:2000258	negative regulation of protein activation cascade	1/575	11/16266	0.327001	0.889596	SUSD4	1
BP	GO:2000846	regulation of corticosteroid hormone secretion	1/575	11/16266	0.327001	0.889596	C1QTNF1	1
BP	GO:0009201	ribonucleoside triphosphate biosynthetic process	3/575	57/16266	0.327401	0.889596	ATP6V0A4/AK9/NME9	3
BP	GO:0021515	cell differentiation in spinal cord	3/575	57/16266	0.327401	0.889596	LHX3/DBX1/FOXN4	3
BP	GO:0033013	tetrapyrrole metabolic process	3/575	57/16266	0.327401	0.889596	SLC25A39/TSPO/MMAA	3
BP	GO:0055006	cardiac cell development	3/575	57/16266	0.327401	0.889596	MEF2A/MYL2/FHOD3	3
BP	GO:0060395	SMAD protein signal transduction	3/575	57/16266	0.327401	0.889596	T/MAGI2/GDF1	3
BP	GO:0045445	myoblast differentiation	4/575	82/16266	0.329567	0.889596	MEF2C/CAPN3/TCF7L2/T	4
BP	GO:0001818	negative regulation of cytokine production	9/575	211/16266	0.330496	0.889596	CYLD/TSPO/GATA3/ERBB2IP/TNFAIP3/BTN2A2/MAP2K5/RNF135/APOD	9
BP	GO:0043406	positive regulation of MAP kinase activity	9/575	211/16266	0.330496	0.889596	NOX4/MAPK10/MAP2K5/PAK1/ADAM8/GRM1/PRDX2/ERCC6/IKBKG	9
BP	GO:0001655	urogenital system development	13/575	317/16266	0.331483	0.889596	DCN/WWTR1/CD44/FGFR2/ACAT1/MEF2C/ACD/EYA1/GATA3/STRA6/CTNNB1/MTSS1/MAGI2	13
BP	GO:0050804	modulation of synaptic transmission	11/575	264/16266	0.331853	0.889596	SNCAIP/RIMS1/MEF2C/NMU/GIPC1/GFAP/PAK1/GRM1/LRP8/GRM2/SHISA8	11
BP	GO:0006614	SRP-dependent cotranslational protein targeting to membrane	5/575	108/16266	0.334804	0.889596	RPS20/RPL34/RPS15A/RPS3/RPL23A	5
BP	GO:0031333	negative regulation of protein complex assembly	5/575	108/16266	0.334804	0.889596	STMN2/FHOD3/PEX5/TBCD/TWF1	5
BP	GO:0042455	ribonucleoside biosynthetic process	5/575	108/16266	0.334804	0.889596	ATP6V0A4/AK9/GMPS/NME9/ADSL	5
BP	GO:0045667	regulation of osteoblast differentiation	5/575	108/16266	0.334804	0.889596	FGFR2/MEF2C/CTNNB1/AXIN2/SEMA4D	5
BP	GO:1901292	nucleoside phosphate catabolic process	5/575	108/16266	0.334804	0.889596	PDE4A/GCK/PDE4D/NEIL1/GNB2L1	5
BP	GO:0042063	gliogenesis	9/575	212/16266	0.335456	0.889596	PHGDH/TSPO/SOX6/GFAP/PPARG/TSPAN2/LRP8/CTNNB1/ADGRG1	9
BP	GO:0032970	regulation of actin filament-based process	13/575	318/16266	0.335523	0.889596	CLASP1/NOX4/ASAP3/PDE4D/SUMO1/GMFG/FHOD3/BCAS3/ANK2/PAK1/TWF1/CLASP2/MTSS1	13
BP	GO:1900180	regulation of protein localization to nucleus	8/575	186/16266	0.3367	0.889596	WWTR1/CYLD/CD36/EDA/AXIN2/SPHK1/APOD/LITAF	8
BP	GO:0006733	oxidoreduction coenzyme metabolic process	6/575	134/16266	0.336906	0.889596	FMO1/IDH3G/COQ9/GCK/ENO2/DCXR	6
BP	GO:0048167	regulation of synaptic plasticity	6/575	134/16266	0.336906	0.889596	RIMS1/MEF2C/GIPC1/GFAP/PAK1/SHISA8	6
BP	GO:0055067	monovalent inorganic cation homeostasis	6/575	134/16266	0.336906	0.889596	ATP12A/SLC4A11/SGK3/ATP6V0A4/SGK1/SLC9A6	6
BP	GO:0036473	cell death in response to oxidative stress	3/575	58/16266	0.337158	0.889596	SOD2/MMP3/GNB2L1	3
BP	GO:0045454	cell redox homeostasis	3/575	58/16266	0.337158	0.889596	ERO1B/TXNDC16/NME9	3
BP	GO:0007200	phospholipase C-activating G-protein coupled receptor signaling pathway	4/575	83/16266	0.33764	0.889596	GRM1/NMUR1/P2RY6/ADRA1D	4
BP	GO:0008652	cellular amino acid biosynthetic process	4/575	83/16266	0.33764	0.889596	PHGDH/AGXT2/GLS2/MTHFD2L	4
BP	GO:0009062	fatty acid catabolic process	4/575	83/16266	0.33764	0.889596	LIPE/PCCB/HADH/MMAA	4
BP	GO:0010518	positive regulation of phospholipase activity	4/575	83/16266	0.33764	0.889596	FGFR2/PLCB2/NMUR1/PRKAR1B	4
BP	GO:0031532	actin cytoskeleton reorganization	4/575	83/16266	0.33764	0.889596	FRY/GMFG/BCAS3/PAK1	4
BP	GO:0006310	DNA recombination	10/575	239/16266	0.338476	0.889596	RPA3/RECQL5/MSH6/DNA2/CHEK1/SMG1/STRA13/RHNO1/RAG2/RUVBL1	10
BP	GO:0002833	positive regulation of response to biotic stimulus	2/575	34/16266	0.339412	0.889596	ANKRD17/PUM1	2
BP	GO:0009262	deoxyribonucleotide metabolic process	2/575	34/16266	0.339412	0.889596	NEIL1/AK9	2
BP	GO:0016073	snRNA metabolic process	2/575	34/16266	0.339412	0.889596	INTS7/ZC3H8	2
BP	GO:0019228	neuronal action potential	2/575	34/16266	0.339412	0.889596	MYH14/PAWR	2
BP	GO:0043094	cellular metabolic compound salvage	2/575	34/16266	0.339412	0.889596	GMPR2/CDA	2
BP	GO:0045168	cell-cell signaling involved in cell fate commitment	2/575	34/16266	0.339412	0.889596	CTNNB1/FGF3	2
BP	GO:0070873	regulation of glycogen metabolic process	2/575	34/16266	0.339412	0.889596	GCK/PHKG2	2
BP	GO:1903312	negative regulation of mRNA metabolic process	2/575	34/16266	0.339412	0.889596	BARD1/RNF20	2
BP	GO:0009266	response to temperature stimulus	9/575	213/16266	0.340428	0.889596	CIRBP/RPA3/RPS6KB1/NUP85/PPARG/SLU7/METRNL/PAWR/FGF16	9
BP	GO:1903533	regulation of protein targeting	12/575	293/16266	0.342405	0.889596	WWTR1/CYLD/CD36/GLS2/EDA/AXIN2/NMUR1/PARL/RUVBL1/SPHK1/APOD/LITAF	12
BP	GO:2001056	positive regulation of cysteine-type endopeptidase activity	6/575	135/16266	0.343205	0.889596	CYFIP2/ACVR1C/PPARG/CRADD/PAWR/GNB2L1	6
BP	GO:0006289	nucleotide-excision repair	4/575	84/16266	0.345721	0.889596	RPA3/NEIL1/FANCC/ERCC6	4
BP	GO:0044243	multicellular organismal catabolic process	4/575	84/16266	0.345721	0.889596	COL11A1/COL4A2/MMP3/COL25A1	4
BP	GO:0061371	determination of heart left/right asymmetry	3/575	59/16266	0.346907	0.889596	MEF2C/FOXN4/T	3
BP	GO:0006613	cotranslational protein targeting to membrane	5/575	110/16266	0.348871	0.889596	RPS20/RPL34/RPS15A/RPS3/RPL23A	5
BP	GO:0009855	determination of bilateral symmetry	5/575	110/16266	0.348871	0.889596	MEF2C/FOXN4/T/CTNNB1/TGIF1	5
BP	GO:0001886	endothelial cell morphogenesis	1/575	12/16266	0.350807	0.889596	PLOD3	1
BP	GO:0002739	regulation of cytokine secretion involved in immune response	1/575	12/16266	0.350807	0.889596	TRIM6	1
BP	GO:0002921	negative regulation of humoral immune response	1/575	12/16266	0.350807	0.889596	SUSD4	1
BP	GO:0003207	cardiac chamber formation	1/575	12/16266	0.350807	0.889596	MEF2C	1
BP	GO:0006244	pyrimidine nucleotide catabolic process	1/575	12/16266	0.350807	0.889596	NEIL1	1
BP	GO:0006662	glycerol ether metabolic process	1/575	12/16266	0.350807	0.889596	FAR2	1
BP	GO:0009109	coenzyme catabolic process	1/575	12/16266	0.350807	0.889596	ALDH1L1	1
BP	GO:0009404	toxin metabolic process	1/575	12/16266	0.350807	0.889596	FMO1	1
BP	GO:0010225	response to UV-C	1/575	12/16266	0.350807	0.889596	POLI	1
BP	GO:0010889	regulation of sequestering of triglyceride	1/575	12/16266	0.350807	0.889596	PPARG	1
BP	GO:0014874	response to stimulus involved in regulation of muscle adaptation	1/575	12/16266	0.350807	0.889596	RPS6KB1	1
BP	GO:0015802	basic amino acid transport	1/575	12/16266	0.350807	0.889596	SLC7A1	1
BP	GO:0016446	somatic hypermutation of immunoglobulin genes	1/575	12/16266	0.350807	0.889596	MSH6	1
BP	GO:0019321	pentose metabolic process	1/575	12/16266	0.350807	0.889596	DCXR	1
BP	GO:0019934	cGMP-mediated signaling	1/575	12/16266	0.350807	0.889596	CD36	1
BP	GO:0030007	cellular potassium ion homeostasis	1/575	12/16266	0.350807	0.889596	ATP12A	1
BP	GO:0030208	dermatan sulfate biosynthetic process	1/575	12/16266	0.350807	0.889596	DCN	1
BP	GO:0030656	regulation of vitamin metabolic process	1/575	12/16266	0.350807	0.889596	CYP27B1	1
BP	GO:0032769	negative regulation of monooxygenase activity	1/575	12/16266	0.350807	0.889596	CYP27B1	1
BP	GO:0032785	negative regulation of DNA-templated transcription, elongation	1/575	12/16266	0.350807	0.889596	RECQL5	1
BP	GO:0033089	positive regulation of T cell differentiation in thymus	1/575	12/16266	0.350807	0.889596	ADAM8	1
BP	GO:0033240	positive regulation of cellular amine metabolic process	1/575	12/16266	0.350807	0.889596	GATA3	1
BP	GO:0035025	positive regulation of Rho protein signal transduction	1/575	12/16266	0.350807	0.889596	ADGRG1	1
BP	GO:0040037	negative regulation of fibroblast growth factor receptor signaling pathway	1/575	12/16266	0.350807	0.889596	GATA3	1
BP	GO:0042340	keratan sulfate catabolic process	1/575	12/16266	0.350807	0.889596	OGN	1
BP	GO:0042368	vitamin D biosynthetic process	1/575	12/16266	0.350807	0.889596	CYP27B1	1
BP	GO:0042415	norepinephrine metabolic process	1/575	12/16266	0.350807	0.889596	GATA3	1
BP	GO:0043923	positive regulation by host of viral transcription	1/575	12/16266	0.350807	0.889596	SMARCA4	1
BP	GO:0045019	negative regulation of nitric oxide biosynthetic process	1/575	12/16266	0.350807	0.889596	TSPO	1
BP	GO:0045161	neuronal ion channel clustering	1/575	12/16266	0.350807	0.889596	SCLT1	1
BP	GO:0045414	regulation of interleukin-8 biosynthetic process	1/575	12/16266	0.350807	0.889596	MAP2K5	1
BP	GO:0045780	positive regulation of bone resorption	1/575	12/16266	0.350807	0.889596	ADAM8	1
BP	GO:0046838	phosphorylated carbohydrate dephosphorylation	1/575	12/16266	0.350807	0.889596	EPM2A	1
BP	GO:0046852	positive regulation of bone remodeling	1/575	12/16266	0.350807	0.889596	ADAM8	1
BP	GO:0048268	clathrin coat assembly	1/575	12/16266	0.350807	0.889596	FCHO1	1
BP	GO:0048642	negative regulation of skeletal muscle tissue development	1/575	12/16266	0.350807	0.889596	TSC22D3	1
BP	GO:0048714	positive regulation of oligodendrocyte differentiation	1/575	12/16266	0.350807	0.889596	PPARG	1
BP	GO:0050961	detection of temperature stimulus involved in sensory perception	1/575	12/16266	0.350807	0.889596	PAWR	1
BP	GO:0050965	detection of temperature stimulus involved in sensory perception of pain	1/575	12/16266	0.350807	0.889596	PAWR	1
BP	GO:0051307	meiotic chromosome separation	1/575	12/16266	0.350807	0.889596	STRA13	1
BP	GO:0051382	kinetochore assembly	1/575	12/16266	0.350807	0.889596	STRA13	1
BP	GO:0051969	regulation of transmission of nerve impulse	1/575	12/16266	0.350807	0.889596	PAWR	1
BP	GO:0055015	ventricular cardiac muscle cell development	1/575	12/16266	0.350807	0.889596	MEF2A	1
BP	GO:0055022	negative regulation of cardiac muscle tissue growth	1/575	12/16266	0.350807	0.889596	KCNK2	1
BP	GO:0060439	trachea morphogenesis	1/575	12/16266	0.350807	0.889596	CTNNB1	1
BP	GO:0060525	prostate glandular acinus development	1/575	12/16266	0.350807	0.889596	FGFR2	1
BP	GO:0060601	lateral sprouting from an epithelium	1/575	12/16266	0.350807	0.889596	FGFR2	1
BP	GO:0060900	embryonic camera-type eye formation	1/575	12/16266	0.350807	0.889596	STRA6	1
BP	GO:0060964	regulation of gene silencing by miRNA	1/575	12/16266	0.350807	0.889596	PUM1	1
BP	GO:0061081	positive regulation of myeloid leukocyte cytokine production involved in immune response	1/575	12/16266	0.350807	0.889596	CD36	1
BP	GO:0061117	negative regulation of heart growth	1/575	12/16266	0.350807	0.889596	KCNK2	1
BP	GO:0061430	bone trabecula morphogenesis	1/575	12/16266	0.350807	0.889596	SEMA4D	1
BP	GO:0070254	mucus secretion	1/575	12/16266	0.350807	0.889596	SYTL2	1
BP	GO:0072178	nephric duct morphogenesis	1/575	12/16266	0.350807	0.889596	GATA3	1
BP	GO:0098909	regulation of cardiac muscle cell action potential involved in regulation of contraction	1/575	12/16266	0.350807	0.889596	ANK2	1
BP	GO:1900015	regulation of cytokine production involved in inflammatory response	1/575	12/16266	0.350807	0.889596	APOD	1
BP	GO:1900409	positive regulation of cellular response to oxidative stress	1/575	12/16266	0.350807	0.889596	MMP3	1
BP	GO:1901213	regulation of transcription from RNA polymerase II promoter involved in heart development	1/575	12/16266	0.350807	0.889596	T	1
BP	GO:1902603	carnitine transmembrane transport	1/575	12/16266	0.350807	0.889596	SLC22A5	1
BP	GO:1902884	positive regulation of response to oxidative stress	1/575	12/16266	0.350807	0.889596	MMP3	1
BP	GO:1904293	negative regulation of ERAD pathway	1/575	12/16266	0.350807	0.889596	USP14	1
BP	GO:1904406	negative regulation of nitric oxide metabolic process	1/575	12/16266	0.350807	0.889596	TSPO	1
BP	GO:2000400	positive regulation of thymocyte aggregation	1/575	12/16266	0.350807	0.889596	ADAM8	1
BP	GO:0002886	regulation of myeloid leukocyte mediated immunity	2/575	35/16266	0.352383	0.889596	C12orf4/STXBP2	2
BP	GO:0006271	DNA strand elongation involved in DNA replication	2/575	35/16266	0.352383	0.889596	RPA3/DNA2	2
BP	GO:0006505	GPI anchor metabolic process	2/575	35/16266	0.352383	0.889596	PGAP2/PIGN	2
BP	GO:0006730	one-carbon metabolic process	2/575	35/16266	0.352383	0.889596	ALDH1L1/MTHFD2L	2
BP	GO:0007031	peroxisome organization	2/575	35/16266	0.352383	0.889596	PEX5/PEX11A	2
BP	GO:0009164	nucleoside catabolic process	2/575	35/16266	0.352383	0.889596	AGXT2/CDA	2
BP	GO:0010799	regulation of peptidyl-threonine phosphorylation	2/575	35/16266	0.352383	0.889596	TRIM6/SPHK1	2
BP	GO:0030865	cortical cytoskeleton organization	2/575	35/16266	0.352383	0.889596	EPB41L2/EPB41	2
BP	GO:0043300	regulation of leukocyte degranulation	2/575	35/16266	0.352383	0.889596	C12orf4/STXBP2	2
BP	GO:0090630	activation of GTPase activity	2/575	35/16266	0.352383	0.889596	CORO1C/BCAS3	2
BP	GO:0098781	ncRNA transcription	2/575	35/16266	0.352383	0.889596	ZC3H8/BRF1	2
BP	GO:0006165	nucleoside diphosphate phosphorylation	4/575	85/16266	0.353805	0.889596	GCK/ENO2/AK9/NME9	4
BP	GO:2001257	regulation of cation channel activity	4/575	85/16266	0.353805	0.889596	GNB5/PDE4D/SUMO1/ANK2	4
BP	GO:0070972	protein localization to endoplasmic reticulum	6/575	137/16266	0.355836	0.889596	RPS20/RPL34/RPS15A/ANK2/RPS3/RPL23A	6
BP	GO:0018108	peptidyl-tyrosine phosphorylation	13/575	323/16266	0.35587	0.889596	CD44/FGFR2/TNFRSF1A/TYRO3/DYRK1B/PPP2R1A/CD36/MAP2K5/LRP8/TNFRSF18/SEMA4D/GNB2L1/ERCC6	13
BP	GO:0009799	specification of symmetry	5/575	111/16266	0.355917	0.889596	MEF2C/FOXN4/T/CTNNB1/TGIF1	5
BP	GO:0043623	cellular protein complex assembly	18/575	458/16266	0.355947	0.889596	CLASP1/COG4/STMN2/ATP6V0A4/COA1/PDE4D/TRIM6/FCHO1/FHOD3/TUBGCP4/TBCD/TWF1/TPPP3/CLASP2/STRA13/MTSS1/NLRP5/CORO7	18
BP	GO:0006520	cellular amino acid metabolic process	16/575	404/16266	0.356417	0.889596	ACAT1/ERO1B/NOX4/PHGDH/GATA3/AGXT2/PSME3/GLS2/SDSL/ALDH1L1/PTS/HPD/GMPS/MTHFD2L/CRTAP/DDAH2	16
BP	GO:0042391	regulation of membrane potential	15/575	377/16266	0.356437	0.889596	HEBP2/RIMS1/MEF2C/KCNK2/TSPO/MYH14/SUMO1/CNGA4/ANK2/CACFD1/KCNK7/PAWR/GABRG3/CNGA1/GNB2L1	15
BP	GO:1903034	regulation of response to wounding	15/575	377/16266	0.356437	0.889596	TNFRSF1A/CLASP1/TYRO3/CAPN3/GATA3/TNFAIP3/PPARG/CD36/SUSD4/ADAM8/CLASP2/PRDX2/C1QTNF1/METRNL/APOD	15
BP	GO:0007202	activation of phospholipase C activity	3/575	60/16266	0.356641	0.889596	PLCB2/NMUR1/PRKAR1B	3
BP	GO:0030521	androgen receptor signaling pathway	3/575	60/16266	0.356641	0.889596	SMARCA4/GRIP1/CTNNB1	3
BP	GO:0032642	regulation of chemokine production	3/575	60/16266	0.356641	0.889596	ERBB2IP/MAP2K5/APOD	3
BP	GO:0035690	cellular response to drug	3/575	60/16266	0.356641	0.889596	PDE4A/MEF2C/CERS1	3
BP	GO:0061045	negative regulation of wound healing	3/575	60/16266	0.356641	0.889596	CLASP1/CLASP2/C1QTNF1	3
BP	GO:0061337	cardiac conduction	3/575	60/16266	0.356641	0.889596	MEF2A/PDE4D/ANK2	3
BP	GO:0032271	regulation of protein polymerization	7/575	164/16266	0.360383	0.889596	CLASP1/STMN2/GMFG/FHOD3/TBCD/TWF1/CLASP2	7
BP	GO:0050818	regulation of coagulation	4/575	86/16266	0.361889	0.889596	PROCR/CD36/PRDX2/C1QTNF1	4
BP	GO:0030307	positive regulation of cell growth	6/575	138/16266	0.362164	0.889596	RIMS1/ADNP2/MAP2K5/SPHK1/RPS6KA3/SEMA4D	6
BP	GO:0033209	tumor necrosis factor-mediated signaling pathway	6/575	138/16266	0.362164	0.889596	TNFRSF1A/CDIP1/PSME3/EDA/SPHK1/TNFRSF18	6
BP	GO:0051592	response to calcium ion	5/575	112/16266	0.362969	0.889596	MEF2A/MEF2C/CAPN3/CARF/ACER1	5
BP	GO:0032868	response to insulin	17/575	433/16266	0.363348	0.889596	HDAC9/FGFR2/CAB39L/TSC2/ATP6V0A4/GCK/RPS6KB1/LAMTOR2/ACVR1C/PSME3/PPARG/PTPRE/IRS4/HADH/FGF3/FGF16/REPIN1	17
BP	GO:0000956	nuclear-transcribed mRNA catabolic process	8/575	191/16266	0.363421	0.889596	RPS20/PPP2R1A/RPL34/RPS15A/PARN/RPS3/SMG1/RPL23A	8
BP	GO:0018212	peptidyl-tyrosine modification	13/575	325/16266	0.364069	0.889596	CD44/FGFR2/TNFRSF1A/TYRO3/DYRK1B/PPP2R1A/CD36/MAP2K5/LRP8/TNFRSF18/SEMA4D/GNB2L1/ERCC6	13
BP	GO:0006111	regulation of gluconeogenesis	2/575	36/16266	0.365265	0.889596	GCK/NR3C1	2
BP	GO:0007435	salivary gland morphogenesis	2/575	36/16266	0.365265	0.889596	FGFR2/EDA	2
BP	GO:0010765	positive regulation of sodium ion transport	2/575	36/16266	0.365265	0.889596	SGK3/SGK1	2
BP	GO:0019068	virion assembly	2/575	36/16266	0.365265	0.889596	PC/CHMP6	2
BP	GO:0030212	hyaluronan metabolic process	2/575	36/16266	0.365265	0.889596	CD44/ITIH3	2
BP	GO:0044088	regulation of vacuole organization	2/575	36/16266	0.365265	0.889596	PHF23/SCFD1	2
BP	GO:0048566	embryonic digestive tract development	2/575	36/16266	0.365265	0.889596	FGFR2/STRA6	2
BP	GO:0060603	mammary gland duct morphogenesis	2/575	36/16266	0.365265	0.889596	FGFR2/NR3C1	2
BP	GO:0061098	positive regulation of protein tyrosine kinase activity	2/575	36/16266	0.365265	0.889596	LRP8/ERCC6	2
BP	GO:0001658	branching involved in ureteric bud morphogenesis	3/575	61/16266	0.366356	0.889596	CD44/EYA1/CTNNB1	3
BP	GO:0006027	glycosaminoglycan catabolic process	3/575	61/16266	0.366356	0.889596	DCN/CD44/OGN	3
BP	GO:0019674	NAD metabolic process	3/575	61/16266	0.366356	0.889596	IDH3G/GCK/ENO2	3
BP	GO:0042509	regulation of tyrosine phosphorylation of STAT protein	3/575	61/16266	0.366356	0.889596	TNFRSF1A/PPP2R1A/TNFRSF18	3
BP	GO:0070301	cellular response to hydrogen peroxide	3/575	61/16266	0.366356	0.889596	TNFAIP3/IL18BP/GNB2L1	3
BP	GO:1901880	negative regulation of protein depolymerization	3/575	61/16266	0.366356	0.889596	CLASP1/STMN2/CLASP2	3
BP	GO:0034612	response to tumor necrosis factor	10/575	245/16266	0.366781	0.889596	TNFRSF1A/CDIP1/GATA3/RPS6KB1/ERBB2IP/PSME3/IL18BP/EDA/SPHK1/TNFRSF18	10
BP	GO:0000725	recombinational repair	4/575	87/16266	0.36997	0.889596	RPA3/CHEK1/SMG1/RHNO1	4
BP	GO:0043154	negative regulation of cysteine-type endopeptidase activity involved in apoptotic process	4/575	87/16266	0.36997	0.889596	CD44/POR/MAP2K5/RPS6KA3	4
BP	GO:0016571	histone methylation	5/575	113/16266	0.370024	0.889596	GATA3/EZH1/CXXC1/RNF20/CTNNB1	5
BP	GO:0008016	regulation of heart contraction	7/575	166/16266	0.371973	0.889596	MEF2A/MYL2/PDE4D/SUMO1/FOXN4/ANK2/ADRA1D	7
BP	GO:0072331	signal transduction by p53 class mediator	7/575	166/16266	0.371973	0.889596	CD44/CDIP1/PSME3/ZNF385B/PGAP2/CRADD/MUC1	7
BP	GO:0000052	citrulline metabolic process	1/575	13/16266	0.373773	0.889596	DDAH2	1
BP	GO:0002031	G-protein coupled receptor internalization	1/575	13/16266	0.373773	0.889596	GRK4	1
BP	GO:0002283	neutrophil activation involved in immune response	1/575	13/16266	0.373773	0.889596	STXBP2	1
BP	GO:0002566	somatic diversification of immune receptors via somatic mutation	1/575	13/16266	0.373773	0.889596	MSH6	1
BP	GO:0003148	outflow tract septum morphogenesis	1/575	13/16266	0.373773	0.889596	FGFR2	1
BP	GO:0003337	mesenchymal to epithelial transition involved in metanephros morphogenesis	1/575	13/16266	0.373773	0.889596	CTNNB1	1
BP	GO:0006264	mitochondrial DNA replication	1/575	13/16266	0.373773	0.889596	DNA2	1
BP	GO:0006622	protein targeting to lysosome	1/575	13/16266	0.373773	0.889596	SNX16	1
BP	GO:0006744	ubiquinone biosynthetic process	1/575	13/16266	0.373773	0.889596	COQ9	1
BP	GO:0006910	phagocytosis, recognition	1/575	13/16266	0.373773	0.889596	CD36	1
BP	GO:0009086	methionine biosynthetic process	1/575	13/16266	0.373773	0.889596	MTHFD2L	1
BP	GO:0009312	oligosaccharide biosynthetic process	1/575	13/16266	0.373773	0.889596	B3GALNT1	1
BP	GO:0010042	response to manganese ion	1/575	13/16266	0.373773	0.889596	TSPO	1
BP	GO:0010640	regulation of platelet-derived growth factor receptor signaling pathway	1/575	13/16266	0.373773	0.889596	APOD	1
BP	GO:0010649	regulation of cell communication by electrical coupling	1/575	13/16266	0.373773	0.889596	PDE4D	1
BP	GO:0010745	negative regulation of macrophage derived foam cell differentiation	1/575	13/16266	0.373773	0.889596	PPARG	1
BP	GO:0010893	positive regulation of steroid biosynthetic process	1/575	13/16266	0.373773	0.889596	POR	1
BP	GO:0010935	regulation of macrophage cytokine production	1/575	13/16266	0.373773	0.889596	CD36	1
BP	GO:0015838	amino-acid betaine transport	1/575	13/16266	0.373773	0.889596	SLC22A5	1
BP	GO:0015879	carnitine transport	1/575	13/16266	0.373773	0.889596	SLC22A5	1
BP	GO:0016024	CDP-diacylglycerol biosynthetic process	1/575	13/16266	0.373773	0.889596	AGPAT3	1
BP	GO:0016558	protein import into peroxisome matrix	1/575	13/16266	0.373773	0.889596	PEX5	1
BP	GO:0018904	ether metabolic process	1/575	13/16266	0.373773	0.889596	FAR2	1
BP	GO:0019371	cyclooxygenase pathway	1/575	13/16266	0.373773	0.889596	TBXAS1	1
BP	GO:0019372	lipoxygenase pathway	1/575	13/16266	0.373773	0.889596	LTC4S	1
BP	GO:0019471	4-hydroxyproline metabolic process	1/575	13/16266	0.373773	0.889596	ERO1B	1
BP	GO:0019511	peptidyl-proline hydroxylation	1/575	13/16266	0.373773	0.889596	CRTAP	1
BP	GO:0021520	spinal cord motor neuron cell fate specification	1/575	13/16266	0.373773	0.889596	LHX3	1
BP	GO:0030205	dermatan sulfate metabolic process	1/575	13/16266	0.373773	0.889596	DCN	1
BP	GO:0031116	positive regulation of microtubule polymerization	1/575	13/16266	0.373773	0.889596	CLASP1	1
BP	GO:0031468	nuclear envelope reassembly	1/575	13/16266	0.373773	0.889596	PPP2R1A	1
BP	GO:0032691	negative regulation of interleukin-1 beta production	1/575	13/16266	0.373773	0.889596	TNFAIP3	1
BP	GO:0034315	regulation of Arp2/3 complex-mediated actin nucleation	1/575	13/16266	0.373773	0.889596	GMFG	1
BP	GO:0035589	G-protein coupled purinergic nucleotide receptor signaling pathway	1/575	13/16266	0.373773	0.889596	P2RY6	1
BP	GO:0035864	response to potassium ion	1/575	13/16266	0.373773	0.889596	CARF	1
BP	GO:0035964	COPI-coated vesicle budding	1/575	13/16266	0.373773	0.889596	ARFGAP1	1
BP	GO:0042074	cell migration involved in gastrulation	1/575	13/16266	0.373773	0.889596	T	1
BP	GO:0042228	interleukin-8 biosynthetic process	1/575	13/16266	0.373773	0.889596	MAP2K5	1
BP	GO:0043518	negative regulation of DNA damage response, signal transduction by p53 class mediator	1/575	13/16266	0.373773	0.889596	CD44	1
BP	GO:0044788	modulation by host of viral process	1/575	13/16266	0.373773	0.889596	PC	1
BP	GO:0045618	positive regulation of keratinocyte differentiation	1/575	13/16266	0.373773	0.889596	CYP27B1	1
BP	GO:0046040	IMP metabolic process	1/575	13/16266	0.373773	0.889596	ADSL	1
BP	GO:0046415	urate metabolic process	1/575	13/16266	0.373773	0.889596	SLC2A9	1
BP	GO:0046851	negative regulation of bone remodeling	1/575	13/16266	0.373773	0.889596	TNFAIP3	1
BP	GO:0048200	Golgi transport vesicle coating	1/575	13/16266	0.373773	0.889596	ARFGAP1	1
BP	GO:0048205	COPI coating of Golgi vesicle	1/575	13/16266	0.373773	0.889596	ARFGAP1	1
BP	GO:0048715	negative regulation of oligodendrocyte differentiation	1/575	13/16266	0.373773	0.889596	CTNNB1	1
BP	GO:0050667	homocysteine metabolic process	1/575	13/16266	0.373773	0.889596	NOX4	1
BP	GO:0050746	regulation of lipoprotein metabolic process	1/575	13/16266	0.373773	0.889596	APOD	1
BP	GO:0050910	detection of mechanical stimulus involved in sensory perception of sound	1/575	13/16266	0.373773	0.889596	COL11A1	1
BP	GO:0051482	positive regulation of cytosolic calcium ion concentration involved in phospholipase C-activating G-protein coupled signaling pathway	1/575	13/16266	0.373773	0.889596	GRM1	1
BP	GO:0051770	positive regulation of nitric-oxide synthase biosynthetic process	1/575	13/16266	0.373773	0.889596	FNTB	1
BP	GO:0060272	embryonic skeletal joint morphogenesis	1/575	13/16266	0.373773	0.889596	CTNNB1	1
BP	GO:0060628	regulation of ER to Golgi vesicle-mediated transport	1/575	13/16266	0.373773	0.889596	SCFD1	1
BP	GO:0060766	negative regulation of androgen receptor signaling pathway	1/575	13/16266	0.373773	0.889596	SMARCA4	1
BP	GO:0071436	sodium ion export	1/575	13/16266	0.373773	0.889596	ATP12A	1
BP	GO:0071545	inositol phosphate catabolic process	1/575	13/16266	0.373773	0.889596	EPM2A	1
BP	GO:0071625	vocalization behavior	1/575	13/16266	0.373773	0.889596	MYH14	1
BP	GO:0071871	response to epinephrine	1/575	13/16266	0.373773	0.889596	PDE4D	1
BP	GO:0072189	ureter development	1/575	13/16266	0.373773	0.889596	GATA3	1
BP	GO:0072531	pyrimidine-containing compound transmembrane transport	1/575	13/16266	0.373773	0.889596	SLC35A3	1
BP	GO:0090330	regulation of platelet aggregation	1/575	13/16266	0.373773	0.889596	C1QTNF1	1
BP	GO:1901663	quinone biosynthetic process	1/575	13/16266	0.373773	0.889596	COQ9	1
BP	GO:1902188	positive regulation of viral release from host cell	1/575	13/16266	0.373773	0.889596	PC	1
BP	GO:1903206	negative regulation of hydrogen peroxide-induced cell death	1/575	13/16266	0.373773	0.889596	GNB2L1	1
BP	GO:2000001	regulation of DNA damage checkpoint	1/575	13/16266	0.373773	0.889596	RNASEH2B	1
BP	GO:2000479	regulation of cAMP-dependent protein kinase activity	1/575	13/16266	0.373773	0.889596	PRKAR1B	1
BP	GO:0048771	tissue remodeling	6/575	140/16266	0.374837	0.889596	MEF2C/NOX4/TNFAIP3/ADAM8/TPP1/CTNNB1	6
BP	GO:0045740	positive regulation of DNA replication	3/575	62/16266	0.376045	0.889596	ACD/DNA2/CTNNB1	3
BP	GO:0060419	heart growth	3/575	62/16266	0.376045	0.889596	FGFR2/MEF2C/KCNK2	3
BP	GO:0061097	regulation of protein tyrosine kinase activity	3/575	62/16266	0.376045	0.889596	LRP8/GNB2L1/ERCC6	3
BP	GO:0000075	cell cycle checkpoint	10/575	247/16266	0.376282	0.889596	PSME3/RNASEH2B/DNA2/INTS7/CHEK1/ORAOV1/RAD17/CRADD/RHNO1/MUC1	10
BP	GO:0001959	regulation of cytokine-mediated signaling pathway	5/575	114/16266	0.377081	0.889596	SUMO1/TRIM6/PPARG/SPHK1/SLIT3	5
BP	GO:0009132	nucleoside diphosphate metabolic process	5/575	114/16266	0.377081	0.889596	GCK/ENO2/AK9/NME9/ENTPD8	5
BP	GO:0045047	protein targeting to ER	5/575	114/16266	0.377081	0.889596	RPS20/RPL34/RPS15A/RPS3/RPL23A	5
BP	GO:1990266	neutrophil migration	4/575	88/16266	0.378044	0.889596	PDE4D/ADAM8/PAWR/CKLF	4
BP	GO:0000578	embryonic axis specification	2/575	37/16266	0.378046	0.889596	T/CTNNB1	2
BP	GO:0003009	skeletal muscle contraction	2/575	37/16266	0.378046	0.889596	MYH14/RPS6KB1	2
BP	GO:0006778	porphyrin-containing compound metabolic process	2/575	37/16266	0.378046	0.889596	SLC25A39/TSPO	2
BP	GO:0010324	membrane invagination	2/575	37/16266	0.378046	0.889596	PPARG/CD36	2
BP	GO:0033865	nucleoside bisphosphate metabolic process	2/575	37/16266	0.378046	0.889596	SULT2A1/SULT1A1	2
BP	GO:0033875	ribonucleoside bisphosphate metabolic process	2/575	37/16266	0.378046	0.889596	SULT2A1/SULT1A1	2
BP	GO:0034032	purine nucleoside bisphosphate metabolic process	2/575	37/16266	0.378046	0.889596	SULT2A1/SULT1A1	2
BP	GO:0035924	cellular response to vascular endothelial growth factor stimulus	2/575	37/16266	0.378046	0.889596	NR4A1/CCBE1	2
BP	GO:0042596	fear response	2/575	37/16266	0.378046	0.889596	MEF2C/RPS6KB1	2
BP	GO:0050832	defense response to fungus	2/575	37/16266	0.378046	0.889596	HTN1/CLEC6A	2
BP	GO:0051489	regulation of filopodium assembly	2/575	37/16266	0.378046	0.889596	BCAS3/GPM6A	2
BP	GO:0072678	T cell migration	2/575	37/16266	0.378046	0.889596	ADAM8/APOD	2
BP	GO:0009743	response to carbohydrate	8/575	194/16266	0.379554	0.889596	NOX4/GCK/RPS6KB1/NCF2/ACVR1C/ILDR2/TCF7L2/GNB2L1	8
BP	GO:0019932	second-messenger-mediated signaling	9/575	221/16266	0.380564	0.889596	PDE4A/PPP2R1A/PDE4D/CD36/ANK2/PPP1R9A/NMUR1/SPHK1/DDAH2	9
BP	GO:0008217	regulation of blood pressure	7/575	168/16266	0.383583	0.889596	SOD2/PDE4D/NCF2/SGK1/PPARG/ADRA1D/UTS2B	7
BP	GO:0031056	regulation of histone modification	5/575	115/16266	0.384135	0.889596	GATA3/CHEK1/RNF20/CTNNB1/MUC1	5
BP	GO:0032104	regulation of response to extracellular stimulus	5/575	115/16266	0.384135	0.889596	PHF23/SCFD1/CYP27B1/PARL/RUVBL1	5
BP	GO:0032107	regulation of response to nutrient levels	5/575	115/16266	0.384135	0.889596	PHF23/SCFD1/CYP27B1/PARL/RUVBL1	5
BP	GO:0010720	positive regulation of cell development	17/575	439/16266	0.384797	0.889596	WWTR1/RIMS1/MEF2C/TSPO/STMN2/GCNT2/GFAP/PPARG/TCF7L2/LRP8/CTNNB1/AXIN2/NDNF/TGIF1/MAGI2/SEMA4D/TCF4	17
BP	GO:0051091	positive regulation of sequence-specific DNA binding transcription factor activity	9/575	222/16266	0.385612	0.889596	CAPN3/SMARCA4/PPARG/RPS3/ADAM8/LRP8/EDA/SPHK1/IKBKG	9
BP	GO:0009880	embryonic pattern specification	3/575	63/16266	0.385704	0.889596	FGFR2/T/CTNNB1	3
BP	GO:0042446	hormone biosynthetic process	3/575	63/16266	0.385704	0.889596	NR3C1/POR/DIO2	3
BP	GO:0050764	regulation of phagocytosis	3/575	63/16266	0.385704	0.889596	PPARG/CD36/GNB2L1	3
BP	GO:1901216	positive regulation of neuron death	3/575	63/16266	0.385704	0.889596	NR3C1/NCF2/PAWR	3
BP	GO:1901655	cellular response to ketone	3/575	63/16266	0.385704	0.889596	PPARG/NTS/P2RY6	3
BP	GO:0001501	skeletal system development	19/575	494/16266	0.385848	0.889596	CD44/COL11A1/FGFR2/MEF2C/ACD/EYA1/COMP/SOX6/PAX1/POR/PRPSAP2/KIAA1715/HAPLN1/CLEC3B/T/CTNNB1/AXIN2/RPS6KA3/SEMA4D	19
BP	GO:0032368	regulation of lipid transport	4/575	89/16266	0.386108	0.889596	TSPO/PPARG/C1QTNF1/REPIN1	4
BP	GO:0034968	histone lysine methylation	4/575	89/16266	0.386108	0.889596	GATA3/EZH1/CXXC1/CTNNB1	4
BP	GO:0060048	cardiac muscle contraction	4/575	89/16266	0.386108	0.889596	MYL2/PDE4D/SUMO1/ANK2	4
BP	GO:0023061	signal release	17/575	440/16266	0.388389	0.889596	SNCAIP/RIMS1/MEF2C/GCK/GATA3/NMU/SLC1A2/ACVR1C/GLS2/SYTL2/HADH/ILDR2/TCF7L2/PAK1/KCNS3/C1QTNF1/PRKAR1B	17
BP	GO:0044344	cellular response to fibroblast growth factor stimulus	13/575	331/16266	0.388821	0.889596	CD44/FGFR2/TSC2/PPP2R1A/GATA3/LAMTOR2/MAPKAP1/NR4A1/PSME3/CTNNB1/FGF3/PRKAR1B/FGF16	13
BP	GO:0006836	neurotransmitter transport	8/575	196/16266	0.390333	0.889596	SNCAIP/RIMS1/MEF2C/SLC1A2/GFAP/GLS2/SYTL2/PAK1	8
BP	GO:0016051	carbohydrate biosynthetic process	8/575	196/16266	0.390333	0.889596	PCK2/GCK/ENO2/EPM2A/NR3C1/PHKG2/B3GALNT1/PC	8
BP	GO:0045765	regulation of angiogenesis	8/575	196/16266	0.390333	0.889596	HDAC9/TNFAIP3/COL4A2/MAP2K5/ANGPTL4/CTNNB1/SPHK1/CCBE1	8
BP	GO:0007059	chromosome segregation	10/575	250/16266	0.390574	0.889596	KIF22/STAG2/PPP2R1A/RECQL5/PPP1R7/CTNNB1/AXIN2/STRA13/CHMP6/CEP57L1	10
BP	GO:0006901	vesicle coating	2/575	38/16266	0.390719	0.889596	ARFGAP1/FCHO1	2
BP	GO:0015682	ferric iron transport	2/575	38/16266	0.390719	0.889596	ATP6V0A4/STEAP2	2
BP	GO:0022616	DNA strand elongation	2/575	38/16266	0.390719	0.889596	RPA3/DNA2	2
BP	GO:0030811	regulation of nucleotide catabolic process	2/575	38/16266	0.390719	0.889596	GCK/GNB2L1	2
BP	GO:0032371	regulation of sterol transport	2/575	38/16266	0.390719	0.889596	TSPO/PPARG	2
BP	GO:0032374	regulation of cholesterol transport	2/575	38/16266	0.390719	0.889596	TSPO/PPARG	2
BP	GO:0032570	response to progesterone	2/575	38/16266	0.390719	0.889596	TSPO/NCF2	2
BP	GO:0033260	nuclear DNA replication	2/575	38/16266	0.390719	0.889596	RPA3/DNA2	2
BP	GO:0046850	regulation of bone remodeling	2/575	38/16266	0.390719	0.889596	TNFAIP3/ADAM8	2
BP	GO:0072512	trivalent inorganic cation transport	2/575	38/16266	0.390719	0.889596	ATP6V0A4/STEAP2	2
BP	GO:0090102	cochlea development	2/575	38/16266	0.390719	0.889596	KCNK2/EYA1	2
BP	GO:0042326	negative regulation of phosphorylation	15/575	386/16266	0.390794	0.889596	WWTR1/WNK1/TSC2/PPP2R1A/FKTN/CORO1C/PDE4D/RGS4/TNFAIP3/GMFG/UCHL1/LEMD2/SEMA4D/PRKAR1B/GNB2L1	15
BP	GO:0019079	viral genome replication	4/575	90/16266	0.394159	0.889596	ATG16L1/NR5A2/TRIM6/NFIA	4
BP	GO:0045446	endothelial cell differentiation	4/575	90/16266	0.394159	0.889596	TNFRSF1A/PLOD3/PDE4D/CTNNB1	4
BP	GO:0046939	nucleotide phosphorylation	4/575	90/16266	0.394159	0.889596	GCK/ENO2/AK9/NME9	4
BP	GO:2000117	negative regulation of cysteine-type endopeptidase activity	4/575	90/16266	0.394159	0.889596	CD44/POR/MAP2K5/RPS6KA3	4
BP	GO:0001707	mesoderm formation	3/575	64/16266	0.395328	0.889596	FGFR2/WLS/T	3
BP	GO:0043242	negative regulation of protein complex disassembly	3/575	64/16266	0.395328	0.889596	CLASP1/STMN2/CLASP2	3
BP	GO:0043620	regulation of DNA-templated transcription in response to stress	3/575	64/16266	0.395328	0.889596	CHEK1/RPS6KA3/MUC1	3
BP	GO:0051304	chromosome separation	3/575	64/16266	0.395328	0.889596	PPP2R1A/RECQL5/STRA13	3
BP	GO:1904030	negative regulation of cyclin-dependent protein kinase activity	3/575	64/16266	0.395328	0.889596	WNK1/TNFAIP3/GMFG	3
BP	GO:0001946	lymphangiogenesis	1/575	14/16266	0.395928	0.889596	CCBE1	1
BP	GO:0002438	acute inflammatory response to antigenic stimulus	1/575	14/16266	0.395928	0.889596	GATA3	1
BP	GO:0002534	cytokine production involved in inflammatory response	1/575	14/16266	0.395928	0.889596	APOD	1
BP	GO:0006089	lactate metabolic process	1/575	14/16266	0.395928	0.889596	HAGH	1
BP	GO:0006241	CTP biosynthetic process	1/575	14/16266	0.395928	0.889596	NME9	1
BP	GO:0006266	DNA ligation	1/575	14/16266	0.395928	0.889596	APTX	1
BP	GO:0006646	phosphatidylethanolamine biosynthetic process	1/575	14/16266	0.395928	0.889596	PISD	1
BP	GO:0006655	phosphatidylglycerol biosynthetic process	1/575	14/16266	0.395928	0.889596	PLA2G6	1
BP	GO:0006743	ubiquinone metabolic process	1/575	14/16266	0.395928	0.889596	COQ9	1
BP	GO:0007351	tripartite regional subdivision	1/575	14/16266	0.395928	0.889596	T	1
BP	GO:0008595	anterior/posterior axis specification, embryo	1/575	14/16266	0.395928	0.889596	T	1
BP	GO:0010934	macrophage cytokine production	1/575	14/16266	0.395928	0.889596	CD36	1
BP	GO:0015812	gamma-aminobutyric acid transport	1/575	14/16266	0.395928	0.889596	PAK1	1
BP	GO:0021535	cell migration in hindbrain	1/575	14/16266	0.395928	0.889596	SEMA4C	1
BP	GO:0021978	telencephalon regionalization	1/575	14/16266	0.395928	0.889596	ADGRG1	1
BP	GO:0030207	chondroitin sulfate catabolic process	1/575	14/16266	0.395928	0.889596	DCN	1
BP	GO:0032206	positive regulation of telomere maintenance	1/575	14/16266	0.395928	0.889596	CTNNB1	1
BP	GO:0032793	positive regulation of CREB transcription factor activity	1/575	14/16266	0.395928	0.889596	LRP8	1
BP	GO:0032799	low-density lipoprotein receptor particle metabolic process	1/575	14/16266	0.395928	0.889596	PPARG	1
BP	GO:0033151	V(D)J recombination	1/575	14/16266	0.395928	0.889596	RAG2	1
BP	GO:0035458	cellular response to interferon-beta	1/575	14/16266	0.395928	0.889596	TRIM6	1
BP	GO:0035886	vascular smooth muscle cell differentiation	1/575	14/16266	0.395928	0.889596	SMARCA2	1
BP	GO:0036037	CD8-positive, alpha-beta T cell activation	1/575	14/16266	0.395928	0.889596	PAX1	1
BP	GO:0036315	cellular response to sterol	1/575	14/16266	0.395928	0.889596	LRP8	1
BP	GO:0039694	viral RNA genome replication	1/575	14/16266	0.395928	0.889596	ATG16L1	1
BP	GO:0039702	viral budding via host ESCRT complex	1/575	14/16266	0.395928	0.889596	CHMP6	1
BP	GO:0039703	RNA replication	1/575	14/16266	0.395928	0.889596	ATG16L1	1
BP	GO:0043650	dicarboxylic acid biosynthetic process	1/575	14/16266	0.395928	0.889596	GLS2	1
BP	GO:0043968	histone H2A acetylation	1/575	14/16266	0.395928	0.889596	RUVBL1	1
BP	GO:0044321	response to leptin	1/575	14/16266	0.395928	0.889596	GCK	1
BP	GO:0044342	type B pancreatic cell proliferation	1/575	14/16266	0.395928	0.889596	NR4A1	1
BP	GO:0045064	T-helper 2 cell differentiation	1/575	14/16266	0.395928	0.889596	GATA3	1
BP	GO:0045540	regulation of cholesterol biosynthetic process	1/575	14/16266	0.395928	0.889596	POR	1
BP	GO:0045603	positive regulation of endothelial cell differentiation	1/575	14/16266	0.395928	0.889596	CTNNB1	1
BP	GO:0045898	regulation of RNA polymerase II transcriptional preinitiation complex assembly	1/575	14/16266	0.395928	0.889596	ATF7IP	1
BP	GO:0046036	CTP metabolic process	1/575	14/16266	0.395928	0.889596	NME9	1
BP	GO:0046321	positive regulation of fatty acid oxidation	1/575	14/16266	0.395928	0.889596	PPARG	1
BP	GO:0046341	CDP-diacylglycerol metabolic process	1/575	14/16266	0.395928	0.889596	AGPAT3	1
BP	GO:0048172	regulation of short-term neuronal synaptic plasticity	1/575	14/16266	0.395928	0.889596	SHISA8	1
BP	GO:0050857	positive regulation of antigen receptor-mediated signaling pathway	1/575	14/16266	0.395928	0.889596	CMTM3	1
BP	GO:0051383	kinetochore organization	1/575	14/16266	0.395928	0.889596	STRA13	1
BP	GO:0051457	maintenance of protein location in nucleus	1/575	14/16266	0.395928	0.889596	SYNE1	1
BP	GO:0060049	regulation of protein glycosylation	1/575	14/16266	0.395928	0.889596	FKTN	1
BP	GO:0061548	ganglion development	1/575	14/16266	0.395928	0.889596	CTNNB1	1
BP	GO:0070293	renal absorption	1/575	14/16266	0.395928	0.889596	SGK1	1
BP	GO:0070307	lens fiber cell development	1/575	14/16266	0.395928	0.889596	FGFR2	1
BP	GO:0071800	podosome assembly	1/575	14/16266	0.395928	0.889596	KIF9	1
BP	GO:0072574	hepatocyte proliferation	1/575	14/16266	0.395928	0.889596	TNFAIP3	1
BP	GO:0072575	epithelial cell proliferation involved in liver morphogenesis	1/575	14/16266	0.395928	0.889596	TNFAIP3	1
BP	GO:0086012	membrane depolarization during cardiac muscle cell action potential	1/575	14/16266	0.395928	0.889596	ANK2	1
BP	GO:0097090	presynaptic membrane organization	1/575	14/16266	0.395928	0.889596	MAGI2	1
BP	GO:1900115	extracellular regulation of signal transduction	1/575	14/16266	0.395928	0.889596	IL18BP	1
BP	GO:1900116	extracellular negative regulation of signal transduction	1/575	14/16266	0.395928	0.889596	IL18BP	1
BP	GO:2000104	negative regulation of DNA-dependent DNA replication	1/575	14/16266	0.395928	0.889596	STAG2	1
BP	GO:2000505	regulation of energy homeostasis	1/575	14/16266	0.395928	0.889596	METRNL	1
BP	GO:2000831	regulation of steroid hormone secretion	1/575	14/16266	0.395928	0.889596	C1QTNF1	1
BP	GO:2001241	positive regulation of extrinsic apoptotic signaling pathway in absence of ligand	1/575	14/16266	0.395928	0.889596	PPP2R1A	1
BP	GO:0032869	cellular response to insulin stimulus	15/575	388/16266	0.398483	0.889596	HDAC9/FGFR2/CAB39L/TSC2/ATP6V0A4/GCK/RPS6KB1/LAMTOR2/PSME3/PPARG/PTPRE/IRS4/FGF3/FGF16/REPIN1	15
BP	GO:0007033	vacuole organization	6/575	144/16266	0.400204	0.889596	PHF23/ATG16L1/SCFD1/MFSD8/TPP1/WDR45	6
BP	GO:0016311	dephosphorylation	16/575	416/16266	0.400765	0.889596	PPP1R12A/WNK1/MEF2C/EYA1/PPP2R1A/EPM2A/PPP1R7/PPP2R4/PTPRE/APTX/SYTL2/PPIP5K1/PAWR/PP2D1/MAGI2/SEMA4D	16
BP	GO:0071356	cellular response to tumor necrosis factor	9/575	225/16266	0.400775	0.889596	TNFRSF1A/CDIP1/GATA3/ERBB2IP/PSME3/IL18BP/EDA/SPHK1/TNFRSF18	9
BP	GO:0000723	telomere maintenance	4/575	91/16266	0.402193	0.889596	ACD/RPA3/DNA2/CTNNB1	4
BP	GO:0001843	neural tube closure	4/575	91/16266	0.402193	0.889596	TSC2/T/SEMA4C/TGIF1	4
BP	GO:0006942	regulation of striated muscle contraction	4/575	91/16266	0.402193	0.889596	MYL2/PDE4D/SUMO1/ANK2	4
BP	GO:0001960	negative regulation of cytokine-mediated signaling pathway	2/575	39/16266	0.403274	0.889596	PPARG/SLIT3	2
BP	GO:0003254	regulation of membrane depolarization	2/575	39/16266	0.403274	0.889596	TSPO/GNB2L1	2
BP	GO:0045494	photoreceptor cell maintenance	2/575	39/16266	0.403274	0.889596	USH2A/ERCC6	2
BP	GO:0045668	negative regulation of osteoblast differentiation	2/575	39/16266	0.403274	0.889596	AXIN2/SEMA4D	2
BP	GO:0045744	negative regulation of G-protein coupled receptor protein signaling pathway	2/575	39/16266	0.403274	0.889596	RGS4/GRK4	2
BP	GO:0072528	pyrimidine-containing compound biosynthetic process	2/575	39/16266	0.403274	0.889596	CDA/NME9	2
BP	GO:1903573	negative regulation of response to endoplasmic reticulum stress	2/575	39/16266	0.403274	0.889596	USP14/GNB2L1	2
BP	GO:0090596	sensory organ morphogenesis	10/575	253/16266	0.404899	0.889596	COL11A1/FGFR2/EYA1/GATA3/STRA6/FOXN4/RPGR/CTNNB1/TMIE/FGF3	10
BP	GO:0033692	cellular polysaccharide biosynthetic process	3/575	65/16266	0.404911	0.889596	GCK/EPM2A/PHKG2	3
BP	GO:0042311	vasodilation	3/575	65/16266	0.404911	0.889596	PLOD3/SOD2/UTS2B	3
BP	GO:0042440	pigment metabolic process	3/575	65/16266	0.404911	0.889596	SLC25A39/TSPO/GMPS	3
BP	GO:0060415	muscle tissue morphogenesis	3/575	65/16266	0.404911	0.889596	COL11A1/FGFR2/MYL2	3
BP	GO:0032963	collagen metabolic process	5/575	118/16266	0.405268	0.889596	COL11A1/PPARG/COL4A2/MMP3/COL25A1	5
BP	GO:0072599	establishment of protein localization to endoplasmic reticulum	5/575	118/16266	0.405268	0.889596	RPS20/RPL34/RPS15A/RPS3/RPL23A	5
BP	GO:0052547	regulation of peptidase activity	15/575	390/16266	0.406185	0.889596	CD44/CYFIP2/USP14/ACVR1C/POR/PSME3/PPARG/MAP2K5/ITIH3/CRADD/RPS6KA3/PAWR/SERPINA5/SPOCK3/GNB2L1	15
BP	GO:0033500	carbohydrate homeostasis	8/575	199/16266	0.406518	0.889596	ERO1B/NOX4/GCK/SPOP/PPARG/TCF7L2/ASPSCR1/GNB2L1	8
BP	GO:0042593	glucose homeostasis	8/575	199/16266	0.406518	0.889596	ERO1B/NOX4/GCK/SPOP/PPARG/TCF7L2/ASPSCR1/GNB2L1	8
BP	GO:0072089	stem cell proliferation	6/575	145/16266	0.406541	0.889596	FGFR2/ABCB1/FOXP2/CTNNB1/FZD9/N4BP2L2	6
BP	GO:0051495	positive regulation of cytoskeleton organization	7/575	172/16266	0.406826	0.889596	CLASP1/NOX4/STMN2/GMFG/BCAS3/PAK1/MTSS1	7
BP	GO:0071774	response to fibroblast growth factor	13/575	336/16266	0.409569	0.889596	CD44/FGFR2/TSC2/PPP2R1A/GATA3/LAMTOR2/MAPKAP1/NR4A1/PSME3/CTNNB1/FGF3/PRKAR1B/FGF16	13
BP	GO:0051493	regulation of cytoskeleton organization	15/575	391/16266	0.41004	0.889596	CLASP1/CYLD/NOX4/ASAP3/STMN2/GMFG/FHOD3/BCAS3/TBCD/PAK1/CHEK1/TWF1/CLASP2/CTNNB1/MTSS1	15
BP	GO:0016241	regulation of macroautophagy	4/575	92/16266	0.410208	0.889596	PHF23/SCFD1/PARL/RUVBL1	4
BP	GO:0048013	ephrin receptor signaling pathway	4/575	92/16266	0.410208	0.889596	MYH14/SS18/PAK1/NCSTN	4
BP	GO:0060606	tube closure	4/575	92/16266	0.410208	0.889596	TSC2/T/SEMA4C/TGIF1	4
BP	GO:0030518	intracellular steroid hormone receptor signaling pathway	5/575	119/16266	0.412294	0.889596	NR3C1/SMARCA4/PAK1/GRIP1/CTNNB1	5
BP	GO:0032479	regulation of type I interferon production	5/575	119/16266	0.412294	0.889596	CYLD/TNFAIP3/CTNNB1/RNF135/IKBKG	5
BP	GO:0033135	regulation of peptidyl-serine phosphorylation	5/575	119/16266	0.412294	0.889596	CD44/PDE4D/TRIM6/PAK1/GNB2L1	5
BP	GO:0051604	protein maturation	13/575	337/16266	0.413725	0.889596	CYFIP2/ERO1B/PPARG/CGA/SUSD4/ADAM8/NCSTN/CLEC3B/CRADD/PARL/PAWR/CCBE1/GNB2L1	13
BP	GO:0001756	somitogenesis	3/575	66/16266	0.41445	0.889596	PAX1/T/AXIN2	3
BP	GO:0002088	lens development in camera-type eye	3/575	66/16266	0.41445	0.889596	FGFR2/GATA3/CTNNB1	3
BP	GO:0006026	aminoglycan catabolic process	3/575	66/16266	0.41445	0.889596	DCN/CD44/OGN	3
BP	GO:0006635	fatty acid beta-oxidation	3/575	66/16266	0.41445	0.889596	PCCB/HADH/MMAA	3
BP	GO:0006977	DNA damage response, signal transduction by p53 class mediator resulting in cell cycle arrest	3/575	66/16266	0.41445	0.889596	PSME3/CRADD/MUC1	3
BP	GO:0007260	tyrosine phosphorylation of STAT protein	3/575	66/16266	0.41445	0.889596	TNFRSF1A/PPP2R1A/TNFRSF18	3
BP	GO:0036498	IRE1-mediated unfolded protein response	3/575	66/16266	0.41445	0.889596	ARFGAP1/CXXC1/TPP1	3
BP	GO:0051279	regulation of release of sequestered calcium ion into cytosol	3/575	66/16266	0.41445	0.889596	CAPN3/PDE4D/ANK2	3
BP	GO:0007131	reciprocal meiotic recombination	2/575	40/16266	0.415705	0.889596	MSH6/STRA13	2
BP	GO:0007431	salivary gland development	2/575	40/16266	0.415705	0.889596	FGFR2/EDA	2
BP	GO:0010507	negative regulation of autophagy	2/575	40/16266	0.415705	0.889596	PHF23/SCFD1	2
BP	GO:0030199	collagen fibril organization	2/575	40/16266	0.415705	0.889596	COL11A1/PLOD3	2
BP	GO:0035825	reciprocal DNA recombination	2/575	40/16266	0.415705	0.889596	MSH6/STRA13	2
BP	GO:0042551	neuron maturation	2/575	40/16266	0.415705	0.889596	SCLT1/RND1	2
BP	GO:0043029	T cell homeostasis	2/575	40/16266	0.415705	0.889596	ZC3H8/TSC22D3	2
BP	GO:0051496	positive regulation of stress fiber assembly	2/575	40/16266	0.415705	0.889596	NOX4/PAK1	2
BP	GO:0051602	response to electrical stimulus	2/575	40/16266	0.415705	0.889596	RPS6KB1/GRM1	2
BP	GO:1901016	regulation of potassium ion transmembrane transporter activity	2/575	40/16266	0.415705	0.889596	SUMO1/ANK2	2
BP	GO:1903305	regulation of regulated secretory pathway	2/575	40/16266	0.415705	0.889596	C12orf4/STXBP2	2
BP	GO:0002374	cytokine secretion involved in immune response	1/575	15/16266	0.4173	0.889596	TRIM6	1
BP	GO:0006750	glutathione biosynthetic process	1/575	15/16266	0.4173	0.889596	HAGH	1
BP	GO:0006957	complement activation, alternative pathway	1/575	15/16266	0.4173	0.889596	SUSD4	1
BP	GO:0006978	DNA damage response, signal transduction by p53 class mediator resulting in transcription of p21 class mediator	1/575	15/16266	0.4173	0.889596	MUC1	1
BP	GO:0007035	vacuolar acidification	1/575	15/16266	0.4173	0.889596	ATP6V0A4	1
BP	GO:0008340	determination of adult lifespan	1/575	15/16266	0.4173	0.889596	MSH6	1
BP	GO:0009151	purine deoxyribonucleotide metabolic process	1/575	15/16266	0.4173	0.889596	AK9	1
BP	GO:0009209	pyrimidine ribonucleoside triphosphate biosynthetic process	1/575	15/16266	0.4173	0.889596	NME9	1
BP	GO:0009219	pyrimidine deoxyribonucleotide metabolic process	1/575	15/16266	0.4173	0.889596	NEIL1	1
BP	GO:0010569	regulation of double-strand break repair via homologous recombination	1/575	15/16266	0.4173	0.889596	CHEK1	1
BP	GO:0010744	positive regulation of macrophage derived foam cell differentiation	1/575	15/16266	0.4173	0.889596	CD36	1
BP	GO:0021527	spinal cord association neuron differentiation	1/575	15/16266	0.4173	0.889596	LHX3	1
BP	GO:0030214	hyaluronan catabolic process	1/575	15/16266	0.4173	0.889596	CD44	1
BP	GO:0030730	sequestering of triglyceride	1/575	15/16266	0.4173	0.889596	PPARG	1
BP	GO:0031000	response to caffeine	1/575	15/16266	0.4173	0.889596	PPARG	1
BP	GO:0031293	membrane protein intracellular domain proteolysis	1/575	15/16266	0.4173	0.889596	NCSTN	1
BP	GO:0032048	cardiolipin metabolic process	1/575	15/16266	0.4173	0.889596	PLA2G6	1
BP	GO:0032656	regulation of interleukin-13 production	1/575	15/16266	0.4173	0.889596	GATA3	1
BP	GO:0032717	negative regulation of interleukin-8 production	1/575	15/16266	0.4173	0.889596	MAP2K5	1
BP	GO:0033599	regulation of mammary gland epithelial cell proliferation	1/575	15/16266	0.4173	0.889596	GATA3	1
BP	GO:0035930	corticosteroid hormone secretion	1/575	15/16266	0.4173	0.889596	C1QTNF1	1
BP	GO:0040023	establishment of nucleus localization	1/575	15/16266	0.4173	0.889596	SYNE1	1
BP	GO:0042362	fat-soluble vitamin biosynthetic process	1/575	15/16266	0.4173	0.889596	CYP27B1	1
BP	GO:0042711	maternal behavior	1/575	15/16266	0.4173	0.889596	NR3C1	1
BP	GO:0043101	purine-containing compound salvage	1/575	15/16266	0.4173	0.889596	GMPR2	1
BP	GO:0043174	nucleoside salvage	1/575	15/16266	0.4173	0.889596	CDA	1
BP	GO:0043584	nose development	1/575	15/16266	0.4173	0.889596	STRA6	1
BP	GO:0045725	positive regulation of glycogen biosynthetic process	1/575	15/16266	0.4173	0.889596	GCK	1
BP	GO:0045910	negative regulation of DNA recombination	1/575	15/16266	0.4173	0.889596	MSH6	1
BP	GO:0046039	GTP metabolic process	1/575	15/16266	0.4173	0.889596	NME9	1
BP	GO:0046827	positive regulation of protein export from nucleus	1/575	15/16266	0.4173	0.889596	TCF7L2	1
BP	GO:0050651	dermatan sulfate proteoglycan biosynthetic process	1/575	15/16266	0.4173	0.889596	DCN	1
BP	GO:0050884	neuromuscular process controlling posture	1/575	15/16266	0.4173	0.889596	PRRT2	1
BP	GO:0051004	regulation of lipoprotein lipase activity	1/575	15/16266	0.4173	0.889596	ANGPTL4	1
BP	GO:0051580	regulation of neurotransmitter uptake	1/575	15/16266	0.4173	0.889596	GFAP	1
BP	GO:0060147	regulation of posttranscriptional gene silencing	1/575	15/16266	0.4173	0.889596	PUM1	1
BP	GO:0060746	parental behavior	1/575	15/16266	0.4173	0.889596	NR3C1	1
BP	GO:0060841	venous blood vessel development	1/575	15/16266	0.4173	0.889596	CCBE1	1
BP	GO:0060966	regulation of gene silencing by RNA	1/575	15/16266	0.4173	0.889596	PUM1	1
BP	GO:0070734	histone H3-K27 methylation	1/575	15/16266	0.4173	0.889596	GATA3	1
BP	GO:0071732	cellular response to nitric oxide	1/575	15/16266	0.4173	0.889596	MMP3	1
BP	GO:0072176	nephric duct development	1/575	15/16266	0.4173	0.889596	GATA3	1
BP	GO:0072673	lamellipodium morphogenesis	1/575	15/16266	0.4173	0.889596	CORO1C	1
BP	GO:0090136	epithelial cell-cell adhesion	1/575	15/16266	0.4173	0.889596	KIFC3	1
BP	GO:0097094	craniofacial suture morphogenesis	1/575	15/16266	0.4173	0.889596	FGFR2	1
BP	GO:1901018	positive regulation of potassium ion transmembrane transporter activity	1/575	15/16266	0.4173	0.889596	ANK2	1
BP	GO:1901032	negative regulation of response to reactive oxygen species	1/575	15/16266	0.4173	0.889596	GNB2L1	1
BP	GO:1903010	regulation of bone development	1/575	15/16266	0.4173	0.889596	POR	1
BP	GO:2000251	positive regulation of actin cytoskeleton reorganization	1/575	15/16266	0.4173	0.889596	BCAS3	1
BP	GO:2000269	regulation of fibroblast apoptotic process	1/575	15/16266	0.4173	0.889596	DDIAS	1
BP	GO:2000310	regulation of N-methyl-D-aspartate selective glutamate receptor activity	1/575	15/16266	0.4173	0.889596	MEF2C	1
BP	GO:2001026	regulation of endothelial cell chemotaxis	1/575	15/16266	0.4173	0.889596	FGF16	1
BP	GO:0007613	memory	4/575	93/16266	0.418201	0.889596	KCNK2/RPS6KB1/PDE4D/SGK1	4
BP	GO:0010517	regulation of phospholipase activity	4/575	93/16266	0.418201	0.889596	FGFR2/PLCB2/NMUR1/PRKAR1B	4
BP	GO:0032200	telomere organization	4/575	93/16266	0.418201	0.889596	ACD/RPA3/DNA2/CTNNB1	4
BP	GO:0051899	membrane depolarization	4/575	93/16266	0.418201	0.889596	TSPO/ANK2/CACFD1/GNB2L1	4
BP	GO:0010817	regulation of hormone levels	18/575	476/16266	0.418651	0.889596	ERO1B/GCK/GATA3/NMU/SLC16A10/NR3C1/ACVR1C/POR/CGA/STRA6/HADH/ILDR2/TCF7L2/KCNS3/C1QTNF1/PRKAR1B/SULT1A1/DIO2	18
BP	GO:0019318	hexose metabolic process	10/575	256/16266	0.419237	0.889596	PCK2/GCK/ENO2/EPM2A/NR3C1/PHKG2/DCXR/PC/C1QTNF1/APOD	10
BP	GO:0019362	pyridine nucleotide metabolic process	5/575	120/16266	0.419309	0.889596	FMO1/IDH3G/GCK/ENO2/DCXR	5
BP	GO:0046496	nicotinamide nucleotide metabolic process	5/575	120/16266	0.419309	0.889596	FMO1/IDH3G/GCK/ENO2/DCXR	5
BP	GO:0008543	fibroblast growth factor receptor signaling pathway	12/575	311/16266	0.419913	0.889596	FGFR2/TSC2/PPP2R1A/GATA3/LAMTOR2/MAPKAP1/NR4A1/PSME3/CTNNB1/FGF3/PRKAR1B/FGF16	12
BP	GO:0002673	regulation of acute inflammatory response	3/575	67/16266	0.423939	0.889596	PPARG/SUSD4/ADAM8	3
BP	GO:0007215	glutamate receptor signaling pathway	3/575	67/16266	0.423939	0.889596	MEF2C/GRM1/GRM2	3
BP	GO:0019935	cyclic-nucleotide-mediated signaling	3/575	67/16266	0.423939	0.889596	PDE4A/PDE4D/CD36	3
BP	GO:0071300	cellular response to retinoic acid	3/575	67/16266	0.423939	0.889596	ADNP2/PPARG/T	3
BP	GO:0072431	signal transduction involved in mitotic G1 DNA damage checkpoint	3/575	67/16266	0.423939	0.889596	PSME3/CRADD/MUC1	3
BP	GO:1902400	intracellular signal transduction involved in G1 DNA damage checkpoint	3/575	67/16266	0.423939	0.889596	PSME3/CRADD/MUC1	3
BP	GO:0032845	negative regulation of homeostatic process	6/575	148/16266	0.425512	0.889596	CAPN3/ACD/PDE4D/TNFAIP3/ANK2/TSC22D3	6
BP	GO:0007043	cell-cell junction assembly	4/575	94/16266	0.426168	0.889596	INADL/TBCD/RHOC/CLDN14	4
BP	GO:0017148	negative regulation of translation	4/575	94/16266	0.426168	0.889596	CIRBP/PUM1/GRB7/GNB2L1	4
BP	GO:0035282	segmentation	4/575	94/16266	0.426168	0.889596	ACD/PAX1/T/AXIN2	4
BP	GO:0050684	regulation of mRNA processing	4/575	94/16266	0.426168	0.889596	RBM25/NSRP1/BARD1/RNF20	4
BP	GO:0072091	regulation of stem cell proliferation	4/575	94/16266	0.426168	0.889596	FGFR2/FOXP2/CTNNB1/N4BP2L2	4
BP	GO:0032606	type I interferon production	5/575	121/16266	0.426309	0.889596	CYLD/TNFAIP3/CTNNB1/RNF135/IKBKG	5
BP	GO:0048489	synaptic vesicle transport	5/575	121/16266	0.426309	0.889596	FGFR2/RIMS1/SYTL2/CACFD1/CTNNB1	5
BP	GO:0097480	establishment of synaptic vesicle localization	5/575	121/16266	0.426309	0.889596	FGFR2/RIMS1/SYTL2/CACFD1/CTNNB1	5
BP	GO:0006312	mitotic recombination	2/575	41/16266	0.428005	0.889596	RPA3/DNA2	2
BP	GO:0007528	neuromuscular junction development	2/575	41/16266	0.428005	0.889596	FGFR2/PAK1	2
BP	GO:0032720	negative regulation of tumor necrosis factor production	2/575	41/16266	0.428005	0.889596	TSPO/TNFAIP3	2
BP	GO:0032881	regulation of polysaccharide metabolic process	2/575	41/16266	0.428005	0.889596	GCK/PHKG2	2
BP	GO:0035136	forelimb morphogenesis	2/575	41/16266	0.428005	0.889596	KIAA1715/CTNNB1	2
BP	GO:0050982	detection of mechanical stimulus	2/575	41/16266	0.428005	0.889596	COL11A1/PAWR	2
BP	GO:0006414	translational elongation	8/575	203/16266	0.428085	0.889596	RPS20/EEF1D/RPL34/TSFM/RPS15A/RPS3/RPL23A/DIO2	8
BP	GO:0007601	visual perception	8/575	203/16266	0.428085	0.889596	USH2A/COL11A1/RIMS1/ABLIM1/KIFC3/RPGR/BEST1/CNGA1	8
BP	GO:0021543	pallium development	6/575	149/16266	0.431818	0.889596	EZH1/FOXP2/MCPH1/LRP8/CTNNB1/ADGRG1	6
BP	GO:0051168	nuclear export	6/575	149/16266	0.431818	0.889596	FYTTD1/BARD1/TCF7L2/SMG1/XPO6/CCHCR1	6
BP	GO:0071901	negative regulation of protein serine/threonine kinase activity	5/575	122/16266	0.433293	0.889596	PPP2R1A/RGS4/TNFAIP3/UCHL1/PRKAR1B	5
BP	GO:0010863	positive regulation of phospholipase C activity	3/575	68/16266	0.433375	0.889596	PLCB2/NMUR1/PRKAR1B	3
BP	GO:0032602	chemokine production	3/575	68/16266	0.433375	0.889596	ERBB2IP/MAP2K5/APOD	3
BP	GO:0043534	blood vessel endothelial cell migration	3/575	68/16266	0.433375	0.889596	HDAC9/NR4A1/MAP2K5	3
BP	GO:0043647	inositol phosphate metabolic process	3/575	68/16266	0.433375	0.889596	EPM2A/PLCB2/PPIP5K1	3
BP	GO:0048332	mesoderm morphogenesis	3/575	68/16266	0.433375	0.889596	FGFR2/WLS/T	3
BP	GO:0097581	lamellipodium organization	3/575	68/16266	0.433375	0.889596	ABLIM1/CORO1C/NUP85	3
BP	GO:0006402	mRNA catabolic process	8/575	204/16266	0.433468	0.889596	RPS20/PPP2R1A/RPL34/RPS15A/PARN/RPS3/SMG1/RPL23A	8
BP	GO:0043281	regulation of cysteine-type endopeptidase activity involved in apoptotic process	8/575	204/16266	0.433468	0.889596	CD44/ACVR1C/POR/PPARG/MAP2K5/CRADD/RPS6KA3/GNB2L1	8
BP	GO:0014065	phosphatidylinositol 3-kinase signaling	4/575	95/16266	0.434108	0.889596	TYRO3/TSC2/GATA3/SEMA4D	4
BP	GO:0097194	execution phase of apoptosis	4/575	95/16266	0.434108	0.889596	ACVR1C/CTNNB1/FNTA/PLEC	4
BP	GO:0008015	blood circulation	16/575	425/16266	0.434346	0.889596	ELN/MEF2A/PLOD3/MYL2/SOD2/PDE4D/SUMO1/NCF2/SGK1/PPARG/NTS/FOXN4/ANK2/EPB41/ADRA1D/UTS2B	16
BP	GO:0050900	leukocyte migration	13/575	342/16266	0.434522	0.889596	CD44/PROCR/GATA3/SELPLG/PDE4D/NUP85/GRB7/ADAM8/GCSAM/PAWR/TNFRSF18/APOD/CKLF	13
BP	GO:0016042	lipid catabolic process	11/575	287/16266	0.435583	0.889596	LIPE/SULT2A1/CYP27B1/PCCB/PLCB2/HADH/MMAA/PLB1/ACER1/SPHK1/PLA2G6	11
BP	GO:0001711	endodermal cell fate commitment	1/575	16/16266	0.437917	0.889596	CTNNB1	1
BP	GO:0003159	morphogenesis of an endothelium	1/575	16/16266	0.437917	0.889596	CTNNB1	1
BP	GO:0003215	cardiac right ventricle morphogenesis	1/575	16/16266	0.437917	0.889596	GATA3	1
BP	GO:0006071	glycerol metabolic process	1/575	16/16266	0.437917	0.889596	MOGAT2	1
BP	GO:0006555	methionine metabolic process	1/575	16/16266	0.437917	0.889596	MTHFD2L	1
BP	GO:0006925	inflammatory cell apoptotic process	1/575	16/16266	0.437917	0.889596	MEF2C	1
BP	GO:0008535	respiratory chain complex IV assembly	1/575	16/16266	0.437917	0.889596	COA1	1
BP	GO:0009208	pyrimidine ribonucleoside triphosphate metabolic process	1/575	16/16266	0.437917	0.889596	NME9	1
BP	GO:0010544	negative regulation of platelet activation	1/575	16/16266	0.437917	0.889596	C1QTNF1	1
BP	GO:0010888	negative regulation of lipid storage	1/575	16/16266	0.437917	0.889596	PPARG	1
BP	GO:0016254	preassembly of GPI anchor in ER membrane	1/575	16/16266	0.437917	0.889596	PIGN	1
BP	GO:0019184	nonribosomal peptide biosynthetic process	1/575	16/16266	0.437917	0.889596	HAGH	1
BP	GO:0021756	striatum development	1/575	16/16266	0.437917	0.889596	FOXP2	1
BP	GO:0030813	positive regulation of nucleotide catabolic process	1/575	16/16266	0.437917	0.889596	GNB2L1	1
BP	GO:0030889	negative regulation of B cell proliferation	1/575	16/16266	0.437917	0.889596	PAWR	1
BP	GO:0031297	replication fork processing	1/575	16/16266	0.437917	0.889596	STRA13	1
BP	GO:0032515	negative regulation of phosphoprotein phosphatase activity	1/575	16/16266	0.437917	0.889596	PPP2R4	1
BP	GO:0032616	interleukin-13 production	1/575	16/16266	0.437917	0.889596	GATA3	1
BP	GO:0032692	negative regulation of interleukin-1 production	1/575	16/16266	0.437917	0.889596	TNFAIP3	1
BP	GO:0034143	regulation of toll-like receptor 4 signaling pathway	1/575	16/16266	0.437917	0.889596	TNFAIP3	1
BP	GO:0035269	protein O-linked mannosylation	1/575	16/16266	0.437917	0.889596	FKTN	1
BP	GO:0036303	lymph vessel morphogenesis	1/575	16/16266	0.437917	0.889596	CCBE1	1
BP	GO:0042772	DNA damage response, signal transduction resulting in transcription	1/575	16/16266	0.437917	0.889596	MUC1	1
BP	GO:0042921	glucocorticoid receptor signaling pathway	1/575	16/16266	0.437917	0.889596	NR3C1	1
BP	GO:0043046	DNA methylation involved in gamete generation	1/575	16/16266	0.437917	0.889596	PIWIL4	1
BP	GO:0043649	dicarboxylic acid catabolic process	1/575	16/16266	0.437917	0.889596	ALDH1L1	1
BP	GO:0044130	negative regulation of growth of symbiont in host	1/575	16/16266	0.437917	0.889596	CD36	1
BP	GO:0044381	glucose import in response to insulin stimulus	1/575	16/16266	0.437917	0.889596	REPIN1	1
BP	GO:0046112	nucleobase biosynthetic process	1/575	16/16266	0.437917	0.889596	GMPS	1
BP	GO:0046514	ceramide catabolic process	1/575	16/16266	0.437917	0.889596	ACER1	1
BP	GO:0048194	Golgi vesicle budding	1/575	16/16266	0.437917	0.889596	ARFGAP1	1
BP	GO:0050655	dermatan sulfate proteoglycan metabolic process	1/575	16/16266	0.437917	0.889596	DCN	1
BP	GO:0050860	negative regulation of T cell receptor signaling pathway	1/575	16/16266	0.437917	0.889596	PAWR	1
BP	GO:0051571	positive regulation of histone H3-K4 methylation	1/575	16/16266	0.437917	0.889596	CTNNB1	1
BP	GO:0055119	relaxation of cardiac muscle	1/575	16/16266	0.437917	0.889596	PDE4D	1
BP	GO:0060055	angiogenesis involved in wound healing	1/575	16/16266	0.437917	0.889596	TNFAIP3	1
BP	GO:0060080	inhibitory postsynaptic potential	1/575	16/16266	0.437917	0.889596	RIMS1	1
BP	GO:0060218	hematopoietic stem cell differentiation	1/575	16/16266	0.437917	0.889596	N4BP2L2	1
BP	GO:0060307	regulation of ventricular cardiac muscle cell membrane repolarization	1/575	16/16266	0.437917	0.889596	ANK2	1
BP	GO:0060390	regulation of SMAD protein import into nucleus	1/575	16/16266	0.437917	0.889596	WWTR1	1
BP	GO:0061318	renal filtration cell differentiation	1/575	16/16266	0.437917	0.889596	MAGI2	1
BP	GO:0071236	cellular response to antibiotic	1/575	16/16266	0.437917	0.889596	MEF2C	1
BP	GO:0071294	cellular response to zinc ion	1/575	16/16266	0.437917	0.889596	TSPO	1
BP	GO:0071305	cellular response to vitamin D	1/575	16/16266	0.437917	0.889596	CYP27B1	1
BP	GO:0072112	glomerular visceral epithelial cell differentiation	1/575	16/16266	0.437917	0.889596	MAGI2	1
BP	GO:0072283	metanephric renal vesicle morphogenesis	1/575	16/16266	0.437917	0.889596	CTNNB1	1
BP	GO:0072498	embryonic skeletal joint development	1/575	16/16266	0.437917	0.889596	CTNNB1	1
BP	GO:0072576	liver morphogenesis	1/575	16/16266	0.437917	0.889596	TNFAIP3	1
BP	GO:0090083	regulation of inclusion body assembly	1/575	16/16266	0.437917	0.889596	SNCAIP	1
BP	GO:0090312	positive regulation of protein deacetylation	1/575	16/16266	0.437917	0.889596	FNTA	1
BP	GO:1901017	negative regulation of potassium ion transmembrane transporter activity	1/575	16/16266	0.437917	0.889596	SUMO1	1
BP	GO:1903205	regulation of hydrogen peroxide-induced cell death	1/575	16/16266	0.437917	0.889596	GNB2L1	1
BP	GO:1903427	negative regulation of reactive oxygen species biosynthetic process	1/575	16/16266	0.437917	0.889596	TSPO	1
BP	GO:2001014	regulation of skeletal muscle cell differentiation	1/575	16/16266	0.437917	0.889596	MEF2C	1
BP	GO:2001273	regulation of glucose import in response to insulin stimulus	1/575	16/16266	0.437917	0.889596	REPIN1	1
BP	GO:0071375	cellular response to peptide hormone stimulus	18/575	482/16266	0.43975	0.889596	HDAC9/FGFR2/CAB39L/TSC2/ATP6V0A4/GCK/RPS6KB1/LAMTOR2/NR4A1/POR/PSME3/PPARG/PTPRE/IRS4/FGF3/PRKAR1B/FGF16/REPIN1	18
BP	GO:0002279	mast cell activation involved in immune response	2/575	42/16266	0.440167	0.889596	C12orf4/STXBP2	2
BP	GO:0002762	negative regulation of myeloid leukocyte differentiation	2/575	42/16266	0.440167	0.889596	PRDM16/CTNNB1	2
BP	GO:0006754	ATP biosynthetic process	2/575	42/16266	0.440167	0.889596	ATP6V0A4/AK9	2
BP	GO:0008333	endosome to lysosome transport	2/575	42/16266	0.440167	0.889596	SNX16/DENND3	2
BP	GO:0034080	CENP-A containing nucleosome assembly	2/575	42/16266	0.440167	0.889596	STRA13/RUVBL1	2
BP	GO:0043113	receptor clustering	2/575	42/16266	0.440167	0.889596	PAK1/MAGI2	2
BP	GO:0043303	mast cell degranulation	2/575	42/16266	0.440167	0.889596	C12orf4/STXBP2	2
BP	GO:0046676	negative regulation of insulin secretion	2/575	42/16266	0.440167	0.889596	ACVR1C/HADH	2
BP	GO:0051310	metaphase plate congression	2/575	42/16266	0.440167	0.889596	KIF22/CHMP6	2
BP	GO:0061641	CENP-A containing chromatin organization	2/575	42/16266	0.440167	0.889596	STRA13/RUVBL1	2
BP	GO:0071398	cellular response to fatty acid	2/575	42/16266	0.440167	0.889596	PPARG/P2RY6	2
BP	GO:1903146	regulation of mitophagy	2/575	42/16266	0.440167	0.889596	PARL/RUVBL1	2
BP	GO:0030856	regulation of epithelial cell differentiation	5/575	123/16266	0.440258	0.889596	WWTR1/TNFRSF1A/GATA3/CYP27B1/CTNNB1	5
BP	GO:0044259	multicellular organismal macromolecule metabolic process	5/575	123/16266	0.440258	0.889596	COL11A1/PPARG/COL4A2/MMP3/COL25A1	5
BP	GO:0090287	regulation of cellular response to growth factor stimulus	9/575	233/16266	0.441215	0.889596	FGFR2/GATA3/FBXL15/GIPC1/PRDM16/CTNNB1/CCBE1/FGF16/SLC9A6	9
BP	GO:0003013	circulatory system process	16/575	427/16266	0.441817	0.889596	ELN/MEF2A/PLOD3/MYL2/SOD2/PDE4D/SUMO1/NCF2/SGK1/PPARG/NTS/FOXN4/ANK2/EPB41/ADRA1D/UTS2B	16
BP	GO:0009798	axis specification	4/575	96/16266	0.442017	0.889596	WLS/T/CTNNB1/AXIN2	4
BP	GO:0014020	primary neural tube formation	4/575	96/16266	0.442017	0.889596	TSC2/T/SEMA4C/TGIF1	4
BP	GO:0018022	peptidyl-lysine methylation	4/575	96/16266	0.442017	0.889596	GATA3/EZH1/CXXC1/CTNNB1	4
BP	GO:0019233	sensory perception of pain	4/575	96/16266	0.442017	0.889596	NMU/GRM1/UCHL1/PAWR	4
BP	GO:0048704	embryonic skeletal system morphogenesis	4/575	96/16266	0.442017	0.889596	COL11A1/FGFR2/EYA1/CTNNB1	4
BP	GO:0006757	ATP generation from ADP	3/575	69/16266	0.442753	0.889596	GCK/ENO2/AK9	3
BP	GO:0009142	nucleoside triphosphate biosynthetic process	3/575	69/16266	0.442753	0.889596	ATP6V0A4/AK9/NME9	3
BP	GO:0030279	negative regulation of ossification	3/575	69/16266	0.442753	0.889596	MEF2C/AXIN2/SEMA4D	3
BP	GO:0032092	positive regulation of protein binding	3/575	69/16266	0.442753	0.889596	MEF2C/TCF7L2/EPB41	3
BP	GO:0061180	mammary gland epithelium development	3/575	69/16266	0.442753	0.889596	FGFR2/GATA3/NR3C1	3
BP	GO:0072413	signal transduction involved in mitotic cell cycle checkpoint	3/575	69/16266	0.442753	0.889596	PSME3/CRADD/MUC1	3
BP	GO:1902402	signal transduction involved in mitotic DNA damage checkpoint	3/575	69/16266	0.442753	0.889596	PSME3/CRADD/MUC1	3
BP	GO:1902403	signal transduction involved in mitotic DNA integrity checkpoint	3/575	69/16266	0.442753	0.889596	PSME3/CRADD/MUC1	3
BP	GO:0009566	fertilization	6/575	151/16266	0.444394	0.889596	SLIRP/TEKT3/T/NLRP5/IZUMO1/SERPINA5	6
BP	GO:0006417	regulation of translation	11/575	289/16266	0.444655	0.889596	CIRBP/RPS6KB1/EIF3G/PIWIL4/PUM1/GRB7/EIF3H/RPS3/RPS6KA3/GNB2L1/DIO2	11
BP	GO:0051346	negative regulation of hydrolase activity	15/575	400/16266	0.444784	0.889596	CD44/WNK1/USP14/PPP2R4/POR/SYTL2/MAP2K5/NEIL1/BCAS3/ITIH3/ANGPTL4/RPS6KA3/SEMA4D/SERPINA5/SPOCK3	15
BP	GO:0042110	T cell activation	16/575	428/16266	0.445552	0.889596	BTN3A1/CYLD/GATA3/MAPKAP1/BTN2A2/PAX1/IL36B/ZC3H8/PAK1/ADAM8/NCSTN/NFKBID/PRDX2/CTNNB1/RAG2/PAWR	16
BP	GO:0070489	T cell aggregation	16/575	428/16266	0.445552	0.889596	BTN3A1/CYLD/GATA3/MAPKAP1/BTN2A2/PAX1/IL36B/ZC3H8/PAK1/ADAM8/NCSTN/NFKBID/PRDX2/CTNNB1/RAG2/PAWR	16
BP	GO:1902105	regulation of leukocyte differentiation	9/575	234/16266	0.446255	0.889596	CYLD/GATA3/IL36B/PRDM16/ZC3H8/ADAM8/NFKBID/PRDX2/CTNNB1	9
BP	GO:0043010	camera-type eye development	11/575	290/16266	0.449187	0.889596	FGFR2/GATA3/MTERF4/SMARCA4/FOXP2/STRA6/FOXN4/GPM6A/RPGR/CTNNB1/TGIF1	11
BP	GO:0048562	embryonic organ morphogenesis	11/575	290/16266	0.449187	0.889596	COL11A1/FGFR2/MEF2C/EYA1/GATA3/STRA6/FOXN4/T/CTNNB1/TMIE/FGF3	11
BP	GO:0071593	lymphocyte aggregation	16/575	429/16266	0.449286	0.889596	BTN3A1/CYLD/GATA3/MAPKAP1/BTN2A2/PAX1/IL36B/ZC3H8/PAK1/ADAM8/NCSTN/NFKBID/PRDX2/CTNNB1/RAG2/PAWR	16
BP	GO:0050953	sensory perception of light stimulus	8/575	207/16266	0.449579	0.889596	USH2A/COL11A1/RIMS1/ABLIM1/KIFC3/RPGR/BEST1/CNGA1	8
BP	GO:0021761	limbic system development	4/575	97/16266	0.449893	0.889596	FGFR2/EZH1/PAK1/LRP8	4
BP	GO:0043648	dicarboxylic acid metabolic process	4/575	97/16266	0.449893	0.889596	IDH3G/GLS2/ALDH1L1/MTHFD2L	4
BP	GO:1903214	regulation of protein targeting to mitochondrion	4/575	97/16266	0.449893	0.889596	GLS2/NMUR1/PARL/RUVBL1	4
BP	GO:0002699	positive regulation of immune effector process	6/575	152/16266	0.450661	0.889596	C12orf4/STXBP2/TRIM6/ANKRD17/PUM1/CD36	6
BP	GO:0006626	protein targeting to mitochondrion	6/575	152/16266	0.450661	0.889596	TSPO/MTERF4/GLS2/NMUR1/PARL/RUVBL1	6
BP	GO:0046165	alcohol biosynthetic process	6/575	152/16266	0.450661	0.889596	SPHK2/CYP27B1/POR/CYB5R2/ACER1/SPHK1	6
BP	GO:0031058	positive regulation of histone modification	3/575	70/16266	0.45207	0.889596	RNF20/CTNNB1/MUC1	3
BP	GO:0043407	negative regulation of MAP kinase activity	3/575	70/16266	0.45207	0.889596	PPP2R1A/RGS4/UCHL1	3
BP	GO:0070664	negative regulation of leukocyte proliferation	3/575	70/16266	0.45207	0.889596	TNFAIP3/BTN2A2/PAWR	3
BP	GO:1900274	regulation of phospholipase C activity	3/575	70/16266	0.45207	0.889596	PLCB2/NMUR1/PRKAR1B	3
BP	GO:0031122	cytoplasmic microtubule organization	2/575	43/16266	0.452185	0.889596	CLASP1/TUBGCP4	2
BP	GO:0048599	oocyte development	2/575	43/16266	0.452185	0.889596	PPP2R1A/CTNNB1	2
BP	GO:0051205	protein insertion into membrane	2/575	43/16266	0.452185	0.889596	REEP1/UBL4A	2
BP	GO:0060986	endocrine hormone secretion	2/575	43/16266	0.452185	0.889596	GATA3/C1QTNF1	2
BP	GO:0090307	mitotic spindle assembly	2/575	43/16266	0.452185	0.889596	CLASP1/TUBGCP4	2
BP	GO:1901532	regulation of hematopoietic progenitor cell differentiation	2/575	43/16266	0.452185	0.889596	MEF2C/N4BP2L2	2
BP	GO:1901658	glycosyl compound catabolic process	2/575	43/16266	0.452185	0.889596	AGXT2/CDA	2
BP	GO:1903556	negative regulation of tumor necrosis factor superfamily cytokine production	2/575	43/16266	0.452185	0.889596	TSPO/TNFAIP3	2
BP	GO:2000179	positive regulation of neural precursor cell proliferation	2/575	43/16266	0.452185	0.889596	CTNNB1/ADGRG1	2
BP	GO:0006936	muscle contraction	11/575	291/16266	0.453715	0.889596	MYH14/RPS6KB1/NMU/MYL2/PDE4D/SUMO1/ANK2/NMUR1/ADRA1D/SPHK1/PAWR	11
BP	GO:0018279	protein N-linked glycosylation via asparagine	5/575	125/16266	0.454127	0.889596	ST3GAL6/ST3GAL5/B4GALT4/SLC35A1/ST8SIA3	5
BP	GO:0035637	multicellular organismal signaling	5/575	125/16266	0.454127	0.889596	MEF2A/MYH14/PDE4D/ANK2/PAWR	5
BP	GO:0050808	synapse organization	8/575	208/16266	0.454934	0.889596	FGFR2/MEF2C/PAK1/GPM6A/NFIA/CTNNB1/MAGI2/SLC9A6	8
BP	GO:0021700	developmental maturation	9/575	236/16266	0.456318	0.889596	PPP2R1A/GATA3/PPARG/ANKRD17/SCLT1/NFIA/CTNNB1/RND1/SEMA4D	9
BP	GO:0048469	cell maturation	6/575	153/16266	0.456913	0.889596	PPP2R1A/GATA3/PPARG/SCLT1/CTNNB1/RND1	6
BP	GO:0090087	regulation of peptide transport	10/575	264/16266	0.457392	0.889596	CYLD/GCK/ACVR1C/HADH/TCF7L2/EDA/KCNS3/SPHK1/PRKAR1B/LITAF	10
BP	GO:0006690	icosanoid metabolic process	4/575	98/16266	0.457733	0.889596	TBXAS1/TNFRSF1A/CYP4F22/LTC4S	4
BP	GO:1901568	fatty acid derivative metabolic process	4/575	98/16266	0.457733	0.889596	TBXAS1/TNFRSF1A/CYP4F22/LTC4S	4
BP	GO:1903555	regulation of tumor necrosis factor superfamily cytokine production	4/575	98/16266	0.457733	0.889596	TSPO/TNFAIP3/CD36/ADAM8	4
BP	GO:0000920	cell separation after cytokinesis	1/575	17/16266	0.457806	0.889596	CHMP6	1
BP	GO:0003283	atrial septum development	1/575	17/16266	0.457806	0.889596	ANK2	1
BP	GO:0006297	nucleotide-excision repair, DNA gap filling	1/575	17/16266	0.457806	0.889596	RPA3	1
BP	GO:0006625	protein targeting to peroxisome	1/575	17/16266	0.457806	0.889596	PEX5	1
BP	GO:0007210	serotonin receptor signaling pathway	1/575	17/16266	0.457806	0.889596	HTR1F	1
BP	GO:0007350	blastoderm segmentation	1/575	17/16266	0.457806	0.889596	T	1
BP	GO:0009068	aspartate family amino acid catabolic process	1/575	17/16266	0.457806	0.889596	SDSL	1
BP	GO:0009200	deoxyribonucleoside triphosphate metabolic process	1/575	17/16266	0.457806	0.889596	AK9	1
BP	GO:0010224	response to UV-B	1/575	17/16266	0.457806	0.889596	ERCC6	1
BP	GO:0015697	quaternary ammonium group transport	1/575	17/16266	0.457806	0.889596	SLC22A5	1
BP	GO:0015858	nucleoside transport	1/575	17/16266	0.457806	0.889596	SLC29A4	1
BP	GO:0016048	detection of temperature stimulus	1/575	17/16266	0.457806	0.889596	PAWR	1
BP	GO:0030033	microvillus assembly	1/575	17/16266	0.457806	0.889596	FXYD5	1
BP	GO:0030852	regulation of granulocyte differentiation	1/575	17/16266	0.457806	0.889596	PRDM16	1
BP	GO:0034104	negative regulation of tissue remodeling	1/575	17/16266	0.457806	0.889596	TNFAIP3	1
BP	GO:0034199	activation of protein kinase A activity	1/575	17/16266	0.457806	0.889596	PRKAR1B	1
BP	GO:0034383	low-density lipoprotein particle clearance	1/575	17/16266	0.457806	0.889596	CD36	1
BP	GO:0035428	hexose transmembrane transport	1/575	17/16266	0.457806	0.889596	SLC2A9	1
BP	GO:0042659	regulation of cell fate specification	1/575	17/16266	0.457806	0.889596	CTNNB1	1
BP	GO:0044126	regulation of growth of symbiont in host	1/575	17/16266	0.457806	0.889596	CD36	1
BP	GO:0044146	negative regulation of growth of symbiont involved in interaction with host	1/575	17/16266	0.457806	0.889596	CD36	1
BP	GO:0045948	positive regulation of translational initiation	1/575	17/16266	0.457806	0.889596	RPS6KB1	1
BP	GO:0046337	phosphatidylethanolamine metabolic process	1/575	17/16266	0.457806	0.889596	PISD	1
BP	GO:0046755	viral budding	1/575	17/16266	0.457806	0.889596	CHMP6	1
BP	GO:0048266	behavioral response to pain	1/575	17/16266	0.457806	0.889596	TSPO	1
BP	GO:0048670	regulation of collateral sprouting	1/575	17/16266	0.457806	0.889596	SEMA4D	1
BP	GO:0050908	detection of light stimulus involved in visual perception	1/575	17/16266	0.457806	0.889596	BEST1	1
BP	GO:0050962	detection of light stimulus involved in sensory perception	1/575	17/16266	0.457806	0.889596	BEST1	1
BP	GO:0051767	nitric-oxide synthase biosynthetic process	1/575	17/16266	0.457806	0.889596	FNTB	1
BP	GO:0051769	regulation of nitric-oxide synthase biosynthetic process	1/575	17/16266	0.457806	0.889596	FNTB	1
BP	GO:0070233	negative regulation of T cell apoptotic process	1/575	17/16266	0.457806	0.889596	TSC22D3	1
BP	GO:0072202	cell differentiation involved in metanephros development	1/575	17/16266	0.457806	0.889596	WWTR1	1
BP	GO:0072311	glomerular epithelial cell differentiation	1/575	17/16266	0.457806	0.889596	MAGI2	1
BP	GO:0072662	protein localization to peroxisome	1/575	17/16266	0.457806	0.889596	PEX5	1
BP	GO:0072663	establishment of protein localization to peroxisome	1/575	17/16266	0.457806	0.889596	PEX5	1
BP	GO:0090162	establishment of epithelial cell polarity	1/575	17/16266	0.457806	0.889596	CLASP1	1
BP	GO:0090185	negative regulation of kidney development	1/575	17/16266	0.457806	0.889596	GATA3	1
BP	GO:0090201	negative regulation of release of cytochrome c from mitochondria	1/575	17/16266	0.457806	0.889596	PARL	1
BP	GO:0098901	regulation of cardiac muscle cell action potential	1/575	17/16266	0.457806	0.889596	ANK2	1
BP	GO:1902170	cellular response to reactive nitrogen species	1/575	17/16266	0.457806	0.889596	MMP3	1
[truncated: 2,987 more rows]

## Sheet: mRNA_UV_cluster 6_GOenrich
Category	ID	Description	GeneRatio	BgRatio	pvalue	padj	geneID	Count
BP	GO:0022604	regulation of cell morphogenesis	55/1045	476/16266	1.6383e-05	0.0716203	IFRD1/GAS7/ATG5/CAMK2B/DNM2/RIMS1/PSEN1/EPB41L3/NRCAM/PQBP1/HPN/KANK1/C1QBP/SEMA5A/EPHA4/BCL11A/PTK2B/GLIPR2/RREB1/TTBK2/UNC13A/EPHB2/DAB2IP/SHROOM3/BBS4/SMAD4/CPNE9/GOLGA4/MYO10/TTBK1/NTRK2/TCF7L2/LRRC4C/ALDOA/EPS8/DMTN/CDC42SE2/FBLIM1/DRAXIN/GDNF/LDLRAD4/CSNK1G1/PTK2/FAM21C/RIMS2/BDNF/FES/ROBO2/DCC/SEMA4A/PRPF40A/SMURF1/L1CAM/LST1/PLXNA4	55
BP	GO:0021700	developmental maturation	32/1045	236/16266	4.94563e-05	0.0716203	IGF1/NRXN3/POU2F2/CAMK2B/AP3D1/GAL/PICALM/RFX3/MMP2/NRCAM/VSX1/CDC25B/LHX6/SEPT4/PTK2B/PLP1/CDKN1A/RUNX2/UNC13A/SPINK5/DAB2IP/STXBP1/REN/GNAQ/KCNMA1/TMEM79/AP1G1/WNT10B/LEP/GLDN/OPA1/WEE2	32
BP	GO:0018105	peptidyl-serine phosphorylation	31/1045	228/16266	6.11878e-05	0.0716203	MLXIPL/CD44/CAMK2B/PFN2/CAMK2A/PDGFB/AVP/IFNG/MAPK14/PDE4D/DOCK7/NEK6/TRIM6/TTBK2/ARRB2/HAX1/TTBK1/TLK2/NTRK2/MAPK13/DMTN/IL24/NSD1/CSNK1G1/CDK1/BRSK2/BDNF/SMYD3/IFNA10/DMD/IFNA4	31
BP	GO:0018209	peptidyl-serine modification	32/1045	242/16266	8.06376e-05	0.0724324	MLXIPL/CD44/CAMK2B/PFN2/CAMK2A/PDGFB/AVP/IFNG/MAPK14/PDE4D/DOCK7/NEK6/TRIM6/TTBK2/ARRB2/HAX1/TTBK1/TLK2/NTRK2/MAPK13/DMTN/IL24/NSD1/CSNK1G1/CDK1/BRSK2/BDNF/SMYD3/IFNA10/SPOCK3/DMD/IFNA4	32
BP	GO:0001558	regulation of cell growth	42/1045	356/16266	0.00010061	0.0724324	IFRD1/IL17RB/GAL/ENO1/DNM2/RIMS1/SMARCA2/EPB41L3/NRCAM/AVP/CSNK2A1/HPN/CRYAB/SEMA5A/HRG/PAPPA2/RPS6KA1/BCL11A/PTK2B/EXOSC9/CDKN1A/UNC13A/CGREF1/KIAA1109/SMAD4/CPNE9/GOLGA4/IGFBP1/EBAG9/EI24/NRG1/DRAXIN/PI16/RIMS2/BDNF/GAS2L1/DCC/SMURF1/L1CAM/DDR1/MUC12/PLXNA4	42
BP	GO:0072593	reactive oxygen species metabolic process	31/1045	235/16266	0.000108293	0.0724324	SLC7A2/CPS1/NDUFS1/ATG5/HDAC4/RAB27A/DNM2/PDGFB/ACP5/PON3/CRYAB/IFNG/MAPK14/PTK2B/CDKN1A/ASS1/MYCN/CD36/PRCP/GCHFR/CYP1A1/EGFR/FANCC/CALM2/CALM3/CYGB/LEP/NOXA1/BCO2/NOS1AP/NOX5	31
BP	GO:0048638	regulation of developmental growth	34/1045	271/16266	0.000139586	0.0816929	IFRD1/IGF1/GAL/DNM2/RIMS1/GNAS/NRCAM/MAPK14/SEMA5A/BCL11A/UNC13A/BBS4/CPNE9/GOLGA4/BCL2L11/NRG1/DRAXIN/PI16/PTK2/WNT10B/LEP/RIMS2/BDNF/BASP1/CSF1/PTCH1/DCC/DIO3/MYH6/SMURF1/L1CAM/MBD5/ATXN2/PLXNA4	34
BP	GO:0097484	dendrite extension	7/1045	20/16266	0.000163452	0.0819852	RIMS1/UNC13A/CPNE9/RIMS2/BDNF/SLC9A6/SMURF1	7
BP	GO:0001676	long-chain fatty acid metabolic process	17/1045	99/16266	0.000175441	0.0819852	MGLL/LIPE/SLC27A5/GGT1/CYP2D6/ABCC1/ACSBG1/PTGDS/CPT1A/ACADL/SCP2/PLP1/CYP1A1/CYP2S1/CYP4F2/CYP4F3/CYP2B6	17
BP	GO:2000377	regulation of reactive oxygen species metabolic process	22/1045	148/16266	0.000192618	0.0819852	ATG5/HDAC4/RAB27A/DNM2/PDGFB/ACP5/PON3/CRYAB/IFNG/MAPK14/PTK2B/CDKN1A/ASS1/MYCN/CD36/PRCP/EGFR/LEP/NOXA1/BCO2/NOS1AP/NOX5	22
BP	GO:0018212	peptidyl-tyrosine modification	38/1045	325/16266	0.000253907	0.0881203	CD4/IGF1/CD44/MAP2K3/PSEN1/TREM2/PDGFB/UNC119/IFNG/PRLR/HRG/EPHA4/PTK2B/CD80/SH3BP5/EPHB2/CD36/ARRB2/IFNAR1/HAX1/EPHA5/EGFR/NTRK2/FER/MERTK/NRG1/TNFRSF14/DMTN/IL24/PTK2/TPST1/LEP/DOK7/YES1/FES/LCK/DDR1/WEE2	38
BP	GO:0009135	purine nucleoside diphosphate metabolic process	16/1045	93/16266	0.000263495	0.0881203	MLXIPL/IGF1/HDAC4/ENO1/PRKAG2/ENO3/MPP2/PPARGC1A/MYOG/CBFA2T3/MPP1/ENTPD1/CASK/ALDOA/HK1/CARD11	16
BP	GO:0009179	purine ribonucleoside diphosphate metabolic process	16/1045	93/16266	0.000263495	0.0881203	MLXIPL/IGF1/HDAC4/ENO1/PRKAG2/ENO3/MPP2/PPARGC1A/MYOG/CBFA2T3/MPP1/ENTPD1/CASK/ALDOA/HK1/CARD11	16
BP	GO:0006631	fatty acid metabolic process	40/1045	352/16266	0.000320421	0.0987224	MLXIPL/MSMO1/MGLL/LIPE/SLC27A5/CREM/GGT1/GGTLC2/GGTLC1/GGT2/CYP2D6/AVP/ABCC1/ACSBG1/PRKAG2/PTGDS/PPARGC1A/CPT1A/APOC3/MAPK14/SCAP/ACADL/SCP2/ACADM/LIAS/PLP1/IVD/APOC1/ETFA/CYP1A1/ACOXL/CYGB/CYP2S1/LEP/TH/CYP4F2/CYP4F3/CYP2B6/CPT1B/ACSM4	40
BP	GO:0009185	ribonucleoside diphosphate metabolic process	16/1045	95/16266	0.000338466	0.0987224	MLXIPL/IGF1/HDAC4/ENO1/PRKAG2/ENO3/MPP2/PPARGC1A/MYOG/CBFA2T3/MPP1/ENTPD1/CASK/ALDOA/HK1/CARD11	16
BP	GO:0071107	response to parathyroid hormone	5/1045	11/16266	0.000361232	0.0987224	HDAC4/GNAS/PTH/SOST/WNT10B	5
BP	GO:0010720	positive regulation of cell development	47/1045	439/16266	0.000397735	0.0987224	PAX6/PRKCH/GRN/CAMK2B/CDON/CBFA2T2/DNM2/RIMS1/RFX3/PSEN1/NRCAM/PRMT5/NDRG4/NUMBL/C1QBP/PRPF19/IFNG/SEMA5A/EPHA4/BCL11A/PTK2B/MYOG/GLIPR2/RREB1/UNC13A/SERPINF1/EPHB2/DAB2IP/SMAD4/CPNE9/GOLGA4/NTRK2/ZEB1/TCF7L2/DMTN/GDNF/RIMS2/BDNF/FES/CSF1/ROBO2/TCF4/SMURF1/OPA1/L1CAM/DMD/ETV5	47
BP	GO:0016049	cell growth	48/1045	452/16266	0.000416673	0.0987224	IFRD1/IL17RB/GAL/ENO1/DNM2/RIMS1/SMARCA2/EPB41L3/NRCAM/PDGFB/AVP/CSNK2A1/NDRG4/HPN/CRYAB/SEMA5A/HRG/PAPPA2/RPS6KA1/BCL11A/PTK2B/EXOSC9/CDKN1A/UNC13A/CGREF1/KIAA1109/SMAD4/CPNE9/GOLGA4/IGFBP1/EBAG9/EI24/ITGB1/SORBS2/NRG1/DRAXIN/PI16/NUPR1/RIMS2/BDNF/GAS2L1/DCC/SLC9A6/SMURF1/L1CAM/DDR1/MUC12/PLXNA4	48
BP	GO:0018108	peptidyl-tyrosine phosphorylation	37/1045	323/16266	0.000453347	0.0987224	CD4/IGF1/CD44/MAP2K3/PSEN1/TREM2/PDGFB/UNC119/IFNG/PRLR/HRG/EPHA4/PTK2B/CD80/SH3BP5/EPHB2/CD36/ARRB2/IFNAR1/HAX1/EPHA5/EGFR/NTRK2/FER/MERTK/NRG1/TNFRSF14/DMTN/IL24/PTK2/LEP/DOK7/YES1/FES/LCK/DDR1/WEE2	37
BP	GO:0010043	response to zinc ion	11/1045	53/16266	0.000458021	0.0987224	CPS1/SLC30A3/HVCN1/ASS1/TH/D2HGDH/LCK/GRIN2A/CRIP1/HMBS/ZNF658	11
BP	GO:0001754	eye photoreceptor cell differentiation	10/1045	45/16266	0.000463881	0.0987224	PROM1/PAX6/SLC4A7/RPGRIP1/GNAT1/BBS4/CNGA3/NTRK2/RDH13/TH	10
BP	GO:0015711	organic anion transport	44/1045	407/16266	0.000489868	0.0997202	SLC7A2/SLC4A7/RIMS1/SLC35C2/PSEN1/SLC27A5/SLCO1A2/AVP/SLC35A2/PRKAG2/CPT1A/FOLR1/APOC3/SLC1A2/PITPNM1/SCP2/APOC1/PPFIA1/CD36/STXBP1/SLCO2B1/SLC5A6/SLC3A1/PRELID3A/TMEM27/SLC26A7/NTRK2/SLC5A12/SLC7A7/SLC6A1/CA4/SEPT2/SERINC2/LEP/BDNF/CYP4F2/RXRA/SLC4A5/GRM7/MYO6/SLC22A24/CPT1B/STARD10/SLC22A31	44
BP	GO:0033135	regulation of peptidyl-serine phosphorylation	18/1045	119/16266	0.000576507	0.112467	MLXIPL/CD44/PFN2/AVP/IFNG/PDE4D/DOCK7/TRIM6/ARRB2/HAX1/NTRK2/DMTN/NSD1/BDNF/SMYD3/IFNA10/DMD/IFNA4	18
BP	GO:2000379	positive regulation of reactive oxygen species metabolic process	14/1045	82/16266	0.000677577	0.1205	HDAC4/RAB27A/DNM2/PDGFB/IFNG/MAPK14/PTK2B/CDKN1A/ASS1/CD36/EGFR/LEP/NOS1AP/NOX5	14
BP	GO:0048588	developmental cell growth	21/1045	152/16266	0.000724424	0.1205	IFRD1/GAL/DNM2/RIMS1/NRCAM/SEMA5A/BCL11A/UNC13A/CPNE9/GOLGA4/ITGB1/SORBS2/DRAXIN/PI16/RIMS2/BDNF/DCC/SLC9A6/SMURF1/L1CAM/PLXNA4	21
BP	GO:0046578	regulation of Ras protein signal transduction	24/1045	184/16266	0.000731885	0.1205	IGF1/DNM2/CYTH4/SOS2/KANK1/CYTH1/APOC3/PLEKHG1/IQSEC2/EPS8L1/ARHGEF9/ARHGEF4/RALGPS1/DAB2IP/FLOT1/IQSEC1/ITGB1/OBSCN/NRG1/DGKI/ABR/COL3A1/CSF1/ADGRG1	24
BP	GO:0042462	eye photoreceptor cell development	8/1045	32/16266	0.000742624	0.1205	PAX6/RPGRIP1/GNAT1/BBS4/CNGA3/NTRK2/RDH13/TH	8
BP	GO:0032496	response to lipopolysaccharide	33/1045	285/16266	0.00074637	0.1205	CPS1/TNIP3/TREM2/ACP5/CACTIN/IFNG/MAPK14/PDE4D/FOXP1/TRIM6/CD80/LIAS/ASS1/CMPK2/CD36/DAB2IP/CASP1/CYP1A1/REN/SCGB1A1/FER/ABR/NLRP3/IL24/B2M/SFTPC/SELP/TH/PROS1/SIGIRR/CD55/ADH5/PLCG2	33
BP	GO:0031344	regulation of cell projection organization	47/1045	454/16266	0.000828017	0.129226	IFRD1/GRN/SH3YL1/ATG5/CAMK2B/HDAC4/PFN2/CBFA2T2/DNM2/RIMS1/PSEN1/NRCAM/PQBP1/NDRG4/KANK1/SEMA5A/HRG/EPHA4/BCL11A/PTK2B/RREB1/UNC13A/EPS8L1/SERPINF1/EPHB2/DAB2IP/BBS4/CPNE9/GOLGA4/MYO10/NTRK2/LRRC4C/FER/DMTN/DRAXIN/PTK2/RIMS2/BDNF/FES/ROBO2/ESPN/DCC/SMURF1/OPA1/L1CAM/DMD/PLXNA4	47
BP	GO:0046209	nitric oxide metabolic process	13/1045	75/16266	0.000899434	0.131206	SLC7A2/CPS1/DNM2/ACP5/IFNG/PTK2B/ASS1/GCHFR/EGFR/CALM2/CALM3/CYGB/NOS1AP	13
BP	GO:0010042	response to manganese ion	5/1045	13/16266	0.000902944	0.131206	SLC11A2/ATP13A2/TH/D2HGDH/GRIN2A	5
BP	GO:0051962	positive regulation of nervous system development	43/1045	408/16266	0.000948872	0.131206	PAX6/IGF1/NRXN3/PRKCH/GRN/CAMK2B/CDON/CBFA2T2/RIMS1/PSEN1/NRCAM/PRMT5/SRPX2/NDRG4/NUMBL/PRPF19/IFNG/SEMA5A/EPHA4/BCL11A/PTK2B/MYRF/UNC13A/SERPINF1/EPHB2/DAB2IP/CPNE9/GOLGA4/NTRK2/ZEB1/NRG1/RIMS2/BDNF/FES/CSF1/ROBO2/SLITRK2/TCF4/SMURF1/OPA1/L1CAM/DMD/ETV5	43
BP	GO:0009132	nucleoside diphosphate metabolic process	17/1045	114/16266	0.000954535	0.131206	MLXIPL/IGF1/HDAC4/ENO1/PRKAG2/ENO3/MPP2/PPARGC1A/MYOG/CBFA2T3/MPP1/CMPK2/ENTPD1/CASK/ALDOA/HK1/CARD11	17
BP	GO:0019932	second-messenger-mediated signaling	27/1045	221/16266	0.00098082	0.131206	CD4/IGF1/HDAC4/GAL/GNAS/TREM2/PDE4D/RCAN3/UBE2B/PTK2B/ADCY7/NFATC1/CD36/EPHA5/EGFR/NTRK2/NRG1/DMTN/CALM2/CALM3/SELP/RIMS2/PDE2A/PLCG2/L1CAM/NOS1AP/DMD	27
BP	GO:1990138	neuron projection extension	17/1045	116/16266	0.00116344	0.144963	IFRD1/DNM2/RIMS1/NRCAM/SEMA5A/BCL11A/UNC13A/CPNE9/GOLGA4/ITGB1/DRAXIN/RIMS2/BDNF/SLC9A6/SMURF1/L1CAM/PLXNA4	17
BP	GO:0015849	organic acid transport	33/1045	293/16266	0.00119941	0.144963	SLC7A2/RIMS1/PSEN1/SLC27A5/SLCO1A2/AVP/PRKAG2/CPT1A/FOLR1/SLC1A2/PPFIA1/CD36/STXBP1/SLCO2B1/SLC5A6/SLC3A1/TMEM27/SLC26A7/NTRK2/SLC5A12/SLC7A7/SLC6A1/SEPT2/SERINC2/LEP/BDNF/CYP4F2/RXRA/GRM7/MYO6/CPT1B/STARD10/FXYD1	33
BP	GO:0008360	regulation of cell shape	19/1045	137/16266	0.00121306	0.144963	GAS7/EPB41L3/HPN/PTK2B/TTBK2/SHROOM3/MYO10/TTBK1/ALDOA/EPS8/DMTN/CDC42SE2/FBLIM1/CSNK1G1/PTK2/FES/SEMA4A/PRPF40A/LST1	19
BP	GO:0035902	response to immobilization stress	6/1045	20/16266	0.00122981	0.144963	GAL/PTK2B/CYP1A1/REN/HNMT/TH	6
BP	GO:1903034	regulation of response to wounding	40/1045	377/16266	0.00123847	0.144963	SLC7A2/PGLYRP1/CALCRL/MGLL/GGT1/PDGFB/ACP5/CD276/KANK1/C1QBP/MVK/MAPK14/HRG/FOXP1/IL1R1/EPHA4/RREB1/FFAR2/CFP/SERPINF1/CD36/CASP1/ADAMTS18/XCL1/REG3G/AHSG/CASK/SCGB1A1/MAPK13/DMTN/ABR/NLRP3/TLR3/MYD88/SELP/PROS1/PDE2A/CD55/CFI/CCL14	40
BP	GO:0050890	cognition	29/1045	248/16266	0.00130253	0.148742	NRXN3/ITGA8/PSEN1/GNAS/MAGT1/NDRG4/NPTX2/SLC11A2/PDE4D/CHST10/FOXP2/SERPINF1/EPHB2/STRA6/BBS4/VIP/EGFR/NTRK2/ITGB1/GRIA1/SLC6A1/DGKI/SHANK2/BDNF/TH/GRIN2A/POMK/GRM7/HLA-DRA	29
BP	GO:0001505	regulation of neurotransmitter levels	24/1045	193/16266	0.00143343	0.156577	NRXN3/SNCAIP/PFN2/CAMK2A/RIMS1/PSEN1/ACHE/NAPA/SLC1A2/KCNC4/SYT5/UNC13A/PPFIA1/STXBP1/GCHFR/CASK/SYT8/SLC6A1/SYN2/DGKI/GDNF/RIMS2/TH/DOC2B	24
BP	GO:2001057	reactive nitrogen species metabolic process	13/1045	79/16266	0.0014788	0.156577	SLC7A2/CPS1/DNM2/ACP5/IFNG/PTK2B/ASS1/GCHFR/EGFR/CALM2/CALM3/CYGB/NOS1AP	13
BP	GO:0022612	gland morphogenesis	18/1045	129/16266	0.0015028	0.156577	PAX6/IGF1/CD44/POLB/PTHLH/HPN/AREG/IFNG/RPS6KA1/SULF1/EGFR/SOSTDC1/CSF1/PTCH1/RXRA/DDR1/CRIP1/ETV5	18
BP	GO:0002237	response to molecule of bacterial origin	33/1045	297/16266	0.0015049	0.156577	CPS1/TNIP3/TREM2/ACP5/CACTIN/IFNG/MAPK14/PDE4D/FOXP1/TRIM6/CD80/LIAS/ASS1/CMPK2/CD36/DAB2IP/CASP1/CYP1A1/REN/SCGB1A1/FER/ABR/NLRP3/IL24/B2M/SFTPC/SELP/TH/PROS1/SIGIRR/CD55/ADH5/PLCG2	33
BP	GO:0044708	single-organism behavior	42/1045	406/16266	0.00155018	0.157781	NRXN3/ITGA8/PSEN1/AVP/SRPX2/NDRG4/NPTX2/DNM1/PTGDS/SLC1A2/SLC11A2/PDE4D/CHST10/EPHA4/FOXP2/SERPINF1/EPHB2/STRA6/GIT2/BBS4/ARRB2/UBR3/VIP/EGFR/NTRK2/ITGB1/EPS8/GRIA1/KCNMA1/SLC6A1/DGKI/SHANK2/GDNF/NPAS2/LEP/BDNF/TH/GRIN2A/POMK/GRM7/GIGYF2/MBD5	42
BP	GO:0043470	regulation of carbohydrate catabolic process	9/1045	44/16266	0.00165632	0.16156	MLXIPL/IGF1/HDAC4/PRKAG2/PPARGC1A/MYOG/CBFA2T3/PPP1CA/PPP1R3E	9
BP	GO:0043471	regulation of cellular carbohydrate catabolic process	9/1045	44/16266	0.00165632	0.16156	MLXIPL/IGF1/HDAC4/PRKAG2/PPARGC1A/MYOG/CBFA2T3/PPP1CA/PPP1R3E	9
BP	GO:0050769	positive regulation of neurogenesis	37/1045	348/16266	0.00178498	0.170557	PAX6/PRKCH/GRN/CAMK2B/CDON/CBFA2T2/RIMS1/PSEN1/NRCAM/PRMT5/NDRG4/NUMBL/PRPF19/IFNG/SEMA5A/EPHA4/BCL11A/PTK2B/UNC13A/SERPINF1/EPHB2/DAB2IP/CPNE9/GOLGA4/NTRK2/ZEB1/RIMS2/BDNF/FES/CSF1/ROBO2/TCF4/SMURF1/OPA1/L1CAM/DMD/ETV5	37
BP	GO:0050730	regulation of peptidyl-tyrosine phosphorylation	25/1045	208/16266	0.00186333	0.174348	CD4/IGF1/CD44/PSEN1/TREM2/PDGFB/UNC119/IFNG/HRG/PTK2B/CD80/SH3BP5/CD36/ARRB2/IFNAR1/HAX1/EGFR/NRG1/TNFRSF14/DMTN/IL24/LEP/DOK7/YES1/LCK	25
BP	GO:0046942	carboxylic acid transport	32/1045	290/16266	0.0019665	0.174348	SLC7A2/RIMS1/PSEN1/SLC27A5/SLCO1A2/AVP/PRKAG2/CPT1A/FOLR1/SLC1A2/PPFIA1/CD36/STXBP1/SLCO2B1/SLC5A6/SLC3A1/TMEM27/SLC26A7/NTRK2/SLC5A12/SLC7A7/SLC6A1/SEPT2/SERINC2/LEP/BDNF/CYP4F2/RXRA/GRM7/MYO6/CPT1B/STARD10	32
BP	GO:0050690	regulation of defense response to virus by virus	7/1045	29/16266	0.001979	0.174348	CD4/AP1B1/ELMO1/B2M/AP1G1/AP1S2/LCK	7
BP	GO:0006865	amino acid transport	19/1045	143/16266	0.00201798	0.174348	SLC7A2/RIMS1/PSEN1/AVP/FOLR1/SLC1A2/PPFIA1/STXBP1/SLC3A1/TMEM27/NTRK2/SLC7A7/SLC6A1/SEPT2/SERINC2/LEP/BDNF/GRM7/MYO6	19
BP	GO:0051057	positive regulation of small GTPase mediated signal transduction	8/1045	37/16266	0.00204861	0.174348	IGF1/CDON/SOS2/NRG1/DGKI/COL3A1/CSF1/ADGRG1	8
BP	GO:0051056	regulation of small GTPase mediated signal transduction	31/1045	280/16266	0.00217631	0.174348	IGF1/CDON/MYO9A/DNM2/ARHGAP28/CYTH4/SOS2/KANK1/CYTH1/APOC3/PLEKHG1/IQSEC2/EPS8L1/ARHGEF9/ARHGEF4/RALGPS1/DAB2IP/FLOT1/FAM13A/IQSEC1/ITGB1/OBSCN/NRG1/DGKI/ABR/ARHGAP25/COL3A1/RALGAPA1/CSF1/ADGRG1/ARHGAP19	31
BP	GO:0007269	neurotransmitter secretion	20/1045	155/16266	0.00222312	0.174348	NRXN3/SNCAIP/PFN2/CAMK2A/RIMS1/PSEN1/NAPA/SLC1A2/KCNC4/SYT5/UNC13A/PPFIA1/STXBP1/CASK/SYT8/SLC6A1/SYN2/DGKI/RIMS2/DOC2B	20
BP	GO:0071229	cellular response to acid chemical	21/1045	166/16266	0.00223546	0.174348	CPS1/MMP2/GNAS/PDGFB/PPARGC1A/CPT1A/FOLR1/PTK2B/MYOG/FFAR2/ASS1/SERPINF1/EGFR/NTRK2/ZEB1/COL3A1/WNT10B/LEP/YES1/GRIN2A/CPEB1	21
BP	GO:0031346	positive regulation of cell projection organization	30/1045	269/16266	0.00227581	0.174348	GRN/CAMK2B/HDAC4/CBFA2T2/DNM2/RIMS1/PSEN1/NDRG4/SEMA5A/EPHA4/BCL11A/PTK2B/RREB1/UNC13A/EPS8L1/SERPINF1/DAB2IP/BBS4/CPNE9/GOLGA4/NTRK2/RIMS2/BDNF/FES/ROBO2/ESPN/SMURF1/OPA1/L1CAM/DMD	30
BP	GO:0014047	glutamate secretion	9/1045	46/16266	0.00229384	0.174348	RIMS1/AVP/SLC1A2/PPFIA1/STXBP1/NTRK2/BDNF/GRM7/MYO6	9
BP	GO:0050770	regulation of axonogenesis	18/1045	134/16266	0.00231389	0.174348	IFRD1/DNM2/PSEN1/NRCAM/SEMA5A/EPHA4/BCL11A/EPHB2/GOLGA4/NTRK2/LRRC4C/DRAXIN/PTK2/BDNF/ROBO2/DCC/L1CAM/PLXNA4	18
BP	GO:0032768	regulation of monooxygenase activity	10/1045	55/16266	0.00237465	0.174348	DNM2/IFNG/PTK2B/GCHFR/EGFR/CALM2/CALM3/CYGB/GDNF/NOS1AP	10
BP	GO:0046530	photoreceptor cell differentiation	10/1045	55/16266	0.00237465	0.174348	PROM1/PAX6/SLC4A7/RPGRIP1/GNAT1/BBS4/CNGA3/NTRK2/RDH13/TH	10
BP	GO:0010769	regulation of cell morphogenesis involved in differentiation	32/1045	294/16266	0.00244349	0.174348	IFRD1/CAMK2B/DNM2/PSEN1/NRCAM/PQBP1/HPN/KANK1/C1QBP/SEMA5A/EPHA4/BCL11A/GLIPR2/RREB1/EPHB2/DAB2IP/SMAD4/GOLGA4/NTRK2/TCF7L2/LRRC4C/DMTN/DRAXIN/GDNF/LDLRAD4/PTK2/FAM21C/BDNF/ROBO2/DCC/L1CAM/PLXNA4	32
BP	GO:0007159	leukocyte cell-cell adhesion	46/1045	466/16266	0.0024443	0.174348	CD4/ZBTB32/IGF1/CD44/AP3D1/RAB27A/PSEN1/DHPS/SOS2/CD276/TNFSF8/IFNG/PRLR/FOXP1/BCL11A/CD80/RUNX2/ASS1/AP3B1/SPINK5/TESPA1/ITGB7/IFNAR1/XCL1/ZEB1/SCGB1A1/ITGB1/TNFRSF14/NLRP3/EOMES/B2M/TMIGD2/SELP/LEP/YES1/HLA-DQB1/LCK/JAG2/IFNA10/SEMA4A/CD55/IFNL3/CARD11/L1CAM/HLA-DRA/IFNA4	46
BP	GO:0010976	positive regulation of neuron projection development	24/1045	201/16266	0.00248053	0.174348	GRN/CAMK2B/CBFA2T2/RIMS1/PSEN1/NDRG4/SEMA5A/EPHA4/BCL11A/PTK2B/UNC13A/SERPINF1/DAB2IP/CPNE9/GOLGA4/NTRK2/RIMS2/BDNF/FES/ROBO2/SMURF1/OPA1/L1CAM/DMD	24
BP	GO:0044724	single-organism carbohydrate catabolic process	18/1045	135/16266	0.00251377	0.174348	MLXIPL/IGF1/CPS1/HDAC4/ENO1/DHDH/PRKAG2/ENO3/PPARGC1A/MYOG/CBFA2T3/ALDOA/HK1/CALM2/CALM3/PPP1CA/NEU4/PPP1R3E	18
BP	GO:0001101	response to acid chemical	32/1045	295/16266	0.0025772	0.174348	CD9/CPS1/MMP2/GNAS/PDGFB/CTSH/PPARGC1A/CPT1A/FOLR1/SLC1A2/PTK2B/MYOG/FFAR2/ASS1/SERPINF1/EGFR/NTRK2/ZEB1/SCGB1A1/SFTPC/COL3A1/WNT10B/LEP/YES1/BDNF/TH/GRIN2A/PTCH1/RXRA/CPEB1/NAIP/HMBS	32
BP	GO:0021987	cerebral cortex development	15/1045	104/16266	0.00259535	0.174348	PAX6/CDON/PSEN1/LHX6/FOXP2/DAB2IP/BBS4/EGFR/NTRK2/EOMES/C16orf45/COL3A1/TH/GRIN2A/ADGRG1	15
BP	GO:0043200	response to amino acid	15/1045	104/16266	0.00259535	0.174348	CPS1/MMP2/PPARGC1A/FOLR1/SLC1A2/ASS1/EGFR/NTRK2/ZEB1/COL3A1/BDNF/GRIN2A/CPEB1/NAIP/HMBS	15
BP	GO:0048261	negative regulation of receptor-mediated endocytosis	5/1045	16/16266	0.00260665	0.174348	PICALM/UNC119/APOC3/APOC1/ATXN2	5
BP	GO:0014075	response to amine	9/1045	47/16266	0.00267846	0.176471	CPS1/ASS1/HNMT/CALM2/CALM3/CTSB/TH/GRIN2A/HMBS	9
BP	GO:0051955	regulation of amino acid transport	6/1045	23/16266	0.00271378	0.176471	AVP/TMEM27/SLC6A1/SEPT2/LEP/GRM7	6
BP	GO:0044242	cellular lipid catabolic process	22/1045	180/16266	0.00275284	0.176559	CPS1/MGLL/LIPE/LIPG/CPT1A/APOC3/ACADL/SCP2/ACADM/IVD/APOC1/SMPD4/ETFA/ACOXL/PPP1CA/LEP/CYP4F2/CYP4F3/BCO2/PLCG2/NEU4/CPT1B	22
BP	GO:0042461	photoreceptor cell development	8/1045	39/16266	0.00291324	0.182589	PAX6/RPGRIP1/GNAT1/BBS4/CNGA3/NTRK2/RDH13/TH	8
BP	GO:0007611	learning or memory	25/1045	215/16266	0.00292486	0.182589	NRXN3/ITGA8/PSEN1/NDRG4/NPTX2/SLC11A2/PDE4D/CHST10/FOXP2/SERPINF1/EPHB2/STRA6/VIP/EGFR/NTRK2/ITGB1/GRIA1/SLC6A1/DGKI/SHANK2/BDNF/TH/GRIN2A/POMK/GRM7	25
BP	GO:0050727	regulation of inflammatory response	29/1045	262/16266	0.00297944	0.183047	SLC7A2/PGLYRP1/CALCRL/MGLL/GGT1/ACP5/CD276/C1QBP/MVK/MAPK14/FOXP1/IL1R1/FFAR2/CFP/SERPINF1/CASP1/XCL1/AHSG/SCGB1A1/MAPK13/ABR/NLRP3/TLR3/MYD88/PROS1/PDE2A/CD55/CFI/CCL14	29
BP	GO:0048640	negative regulation of developmental growth	11/1045	66/16266	0.00301038	0.183047	IFRD1/GAL/GNAS/SEMA5A/BCL11A/DRAXIN/PI16/PTK2/PTCH1/DCC/ATXN2	11
BP	GO:0030307	positive regulation of cell growth	18/1045	138/16266	0.00320198	0.183487	RIMS1/AVP/CSNK2A1/HPN/SEMA5A/RPS6KA1/BCL11A/PTK2B/EXOSC9/UNC13A/CPNE9/GOLGA4/IGFBP1/NRG1/RIMS2/BDNF/SMURF1/L1CAM	18
BP	GO:0002576	platelet degranulation	13/1045	86/16266	0.00322252	0.183487	CD9/IGF1/ACTN1/PDGFB/HRG/CD36/STXBP1/ALDOA/DMTN/CALM2/CALM3/SELP/PROS1	13
BP	GO:0010975	regulation of neuron projection development	35/1045	336/16266	0.00327359	0.183487	IFRD1/GRN/CAMK2B/CBFA2T2/DNM2/RIMS1/PSEN1/NRCAM/PQBP1/NDRG4/KANK1/SEMA5A/EPHA4/BCL11A/PTK2B/UNC13A/SERPINF1/EPHB2/DAB2IP/CPNE9/GOLGA4/NTRK2/LRRC4C/DRAXIN/PTK2/RIMS2/BDNF/FES/ROBO2/DCC/SMURF1/OPA1/L1CAM/DMD/PLXNA4	35
BP	GO:0050804	modulation of synaptic transmission	29/1045	264/16266	0.0033277	0.183487	CAMK2B/SNCAIP/PFN2/CAMK2A/RIMS1/PSEN1/ACHE/NAPA/IFNG/KCNC4/PTK2B/GNAI1/UNC13A/EPHB2/STXBP1/FLOT1/ARRB2/NTRK2/GRIA1/SLC6A1/DGKI/SHANK2/PXK/GDNF/RIMS2/BDNF/GRIN2A/GRM7/MYO6	29
BP	GO:0045666	positive regulation of neuron differentiation	30/1045	276/16266	0.00334463	0.183487	GRN/CAMK2B/CDON/CBFA2T2/RIMS1/PSEN1/NRCAM/NDRG4/IFNG/SEMA5A/EPHA4/BCL11A/PTK2B/UNC13A/SERPINF1/DAB2IP/CPNE9/GOLGA4/NTRK2/ZEB1/RIMS2/BDNF/FES/ROBO2/TCF4/SMURF1/OPA1/L1CAM/DMD/ETV5	30
BP	GO:0035412	regulation of catenin import into nucleus	6/1045	24/16266	0.00342445	0.183487	KANK1/SEMA5A/DAB2IP/EGFR/GNAQ/POU5F1	6
BP	GO:0033539	fatty acid beta-oxidation using acyl-CoA dehydrogenase	5/1045	17/16266	0.00349951	0.183487	ACADL/ACADM/IVD/ETFA/ACOXL	5
BP	GO:1903859	regulation of dendrite extension	5/1045	17/16266	0.00349951	0.183487	RIMS1/UNC13A/CPNE9/RIMS2/SMURF1	5
BP	GO:1903861	positive regulation of dendrite extension	5/1045	17/16266	0.00349951	0.183487	RIMS1/UNC13A/CPNE9/RIMS2/SMURF1	5
BP	GO:0043502	regulation of muscle adaptation	10/1045	58/16266	0.00355977	0.183487	GTF2IRD1/IGF1/CAMK2B/HDAC4/TNNT1/AKAP1/MYOG/TNNI1/PI16/SCN5A	10
BP	GO:0045927	positive regulation of growth	26/1045	230/16266	0.00359175	0.183487	IGF1/RIMS1/AVP/CSNK2A1/HPN/MAPK14/SEMA5A/RPS6KA1/BCL11A/PTK2B/EXOSC9/UNC13A/BBS4/CPNE9/GOLGA4/IGFBP1/NRG1/WNT10B/LEP/RIMS2/BDNF/BASP1/CSF1/DIO3/SMURF1/L1CAM	26
BP	GO:0071230	cellular response to amino acid stimulus	9/1045	49/16266	0.0035998	0.183487	MMP2/FOLR1/ASS1/EGFR/NTRK2/ZEB1/COL3A1/GRIN2A/CPEB1	9
BP	GO:0002720	positive regulation of cytokine production involved in immune response	7/1045	32/16266	0.00360645	0.183487	TRIM6/FFAR2/CD36/XCL1/TNFRSF14/NLRP3/B2M	7
BP	GO:0006691	leukotriene metabolic process	7/1045	32/16266	0.00360645	0.183487	GGT1/GGTLC2/GGTLC1/GGT2/ABCC1/CYP4F2/CYP4F3	7
BP	GO:0008038	neuron recognition	7/1045	32/16266	0.00360645	0.183487	NRCAM/SEMA5A/EPHA4/EPHB2/BDNF/NTM/ROBO2	7
BP	GO:0006887	exocytosis	38/1045	376/16266	0.00376807	0.183487	CD9/IGF1/RAB27A/PFN2/ACTN1/RIMS1/PSEN1/REST/PDGFB/NAPA/HRG/ROPN1B/SYT5/UNC13A/CD36/VPS45/STXBP1/SCRN3/STXBP5L/TMEM27/SYT8/ALDOA/FER/DMTN/ABR/CALM2/CALM3/TMEM79/AP1G1/SELP/BRSK2/RIMS2/FES/PROS1/TNFAIP2/SCAMP5/MICAL3/DOC2B	38
BP	GO:0006096	glycolytic process	11/1045	68/16266	0.00382324	0.183487	MLXIPL/IGF1/HDAC4/ENO1/PRKAG2/ENO3/PPARGC1A/MYOG/CBFA2T3/ALDOA/HK1	11
BP	GO:0097581	lamellipodium organization	11/1045	68/16266	0.00382324	0.183487	HDAC4/DNM2/ABLIM1/KANK1/HRG/RREB1/AJUBA/ARHGEF4/FER/DMTN/SH2B1	11
BP	GO:0006690	icosanoid metabolic process	14/1045	98/16266	0.00387955	0.183487	MGLL/GGT1/GGTLC2/GGTLC1/GGT2/CYP2D6/AVP/ABCC1/PTGDS/CYP1A1/CYP2S1/CYP4F2/CYP4F3/CYP2B6	14
BP	GO:1901568	fatty acid derivative metabolic process	14/1045	98/16266	0.00387955	0.183487	MGLL/GGT1/GGTLC2/GGTLC1/GGT2/CYP2D6/AVP/ABCC1/PTGDS/CYP1A1/CYP2S1/CYP4F2/CYP4F3/CYP2B6	14
BP	GO:0002475	antigen processing and presentation via MHC class Ib	4/1045	11/16266	0.0038798	0.183487	ABCB5/AP3D1/AP3B1/B2M	4
BP	GO:0035413	positive regulation of catenin import into nucleus	4/1045	11/16266	0.0038798	0.183487	KANK1/SEMA5A/EGFR/POU5F1	4
BP	GO:0044275	cellular carbohydrate catabolic process	12/1045	78/16266	0.0039414	0.184536	MLXIPL/IGF1/CPS1/HDAC4/PRKAG2/PPARGC1A/MYOG/CBFA2T3/CALM2/CALM3/PPP1CA/PPP1R3E	12
BP	GO:0035411	catenin import into nucleus	6/1045	25/16266	0.00426472	0.190818	KANK1/SEMA5A/DAB2IP/EGFR/GNAQ/POU5F1	6
BP	GO:0006757	ATP generation from ADP	11/1045	69/16266	0.00429065	0.190818	MLXIPL/IGF1/HDAC4/ENO1/PRKAG2/ENO3/PPARGC1A/MYOG/CBFA2T3/ALDOA/HK1	11
BP	GO:0006110	regulation of glycolytic process	7/1045	33/16266	0.00432818	0.190818	MLXIPL/IGF1/HDAC4/PRKAG2/PPARGC1A/MYOG/CBFA2T3	7
BP	GO:0043403	skeletal muscle tissue regeneration	7/1045	33/16266	0.00432818	0.190818	IFRD1/IGF1/ENO3/MAPK14/MYOG/WNT10B/EYS	7
BP	GO:0048469	cell maturation	19/1045	153/16266	0.00434185	0.190818	POU2F2/GAL/RFX3/NRCAM/VSX1/CDC25B/LHX6/SEPT4/PTK2B/PLP1/CDKN1A/RUNX2/REN/GNAQ/KCNMA1/TMEM79/GLDN/OPA1/WEE2	19
BP	GO:0048639	positive regulation of developmental growth	19/1045	153/16266	0.00434185	0.190818	IGF1/RIMS1/MAPK14/SEMA5A/BCL11A/UNC13A/BBS4/CPNE9/GOLGA4/NRG1/WNT10B/LEP/RIMS2/BDNF/BASP1/CSF1/DIO3/SMURF1/L1CAM	19
BP	GO:0006835	dicarboxylic acid transport	13/1045	89/16266	0.00436086	0.190818	RIMS1/PSEN1/AVP/FOLR1/SLC1A2/PPFIA1/STXBP1/SLC26A7/NTRK2/SEPT2/BDNF/GRM7/MYO6	13
BP	GO:0002076	osteoblast development	5/1045	18/16266	0.00459237	0.197261	HDAC4/ACHE/PTHLH/RUNX2/MEN1	5
BP	GO:1902307	positive regulation of sodium ion transmembrane transport	5/1045	18/16266	0.00459237	0.197261	DNM2/ANK3/WNK2/DMD/FXYD1	5
BP	GO:0050731	positive regulation of peptidyl-tyrosine phosphorylation	19/1045	154/16266	0.0046634	0.197313	CD4/IGF1/CD44/TREM2/PDGFB/UNC119/IFNG/PTK2B/CD80/CD36/ARRB2/HAX1/NRG1/TNFRSF14/IL24/LEP/DOK7/YES1/LCK	19
BP	GO:0045785	positive regulation of cell adhesion	36/1045	356/16266	0.00467786	0.197313	CD4/IGF1/CD44/AP3D1/FSTL3/DNM2/DHPS/CD276/C1QBP/IFNG/HRG/PTK2B/CD80/RREB1/AP3B1/CD36/TESPA1/FLOT1/XCL1/MYO10/ABI3BP/NRG1/TNFRSF14/DMTN/NLRP3/TMIGD2/SELP/YES1/HLA-DQB1/LCK/CSF1/CD55/CARD11/L1CAM/HLA-DRA/ADGRG1	36
BP	GO:0016052	carbohydrate catabolic process	18/1045	144/16266	0.00505115	0.202146	MLXIPL/IGF1/CPS1/HDAC4/ENO1/DHDH/PRKAG2/ENO3/PPARGC1A/MYOG/CBFA2T3/ALDOA/HK1/CALM2/CALM3/PPP1CA/NEU4/PPP1R3E	18
BP	GO:0010721	negative regulation of cell development	28/1045	260/16266	0.00509552	0.202146	IFRD1/PAX6/IGF1/CTNNA1/GAL/CBFA2T2/PSEN1/REST/HPN/KANK1/PRPF19/SEMA5A/EPHA4/BCL11A/EPHB2/MYCN/DAB2IP/DMTN/DRAXIN/PI16/C16orf45/COL3A1/LDLRAD4/PTK2/BDNF/DCC/ADGRG1/WEE2	28
BP	GO:0019228	neuronal action potential	7/1045	34/16266	0.00515389	0.202146	IFNG/SCN2A/CHRNA1/ANK3/SCN3A/KCNMA1/SCN5A	7
BP	GO:0042304	regulation of fatty acid biosynthetic process	7/1045	34/16266	0.00515389	0.202146	MLXIPL/AVP/PRKAG2/APOC3/SCAP/ACADL/APOC1	7
BP	GO:0019369	arachidonic acid metabolic process	10/1045	61/16266	0.00517155	0.202146	MGLL/GGT1/CYP2D6/ABCC1/PTGDS/CYP1A1/CYP2S1/CYP4F2/CYP4F3/CYP2B6	10
BP	GO:0042306	regulation of protein import into nucleus	20/1045	167/16266	0.00526385	0.202146	IGF1/FBXW11/ZNF268/KANK1/MAPK14/MDFI/SEMA5A/AKAP1/CDKN1A/CD36/DAB2IP/SMAD4/EGFR/GNAQ/NLRP3/TLR3/LEP/PARP10/PDE2A/POU5F1	20
BP	GO:0050865	regulation of cell activation	43/1045	447/16266	0.00527144	0.202146	SLC7A2/PGLYRP1/CD4/IGF1/AP3D1/GAL/DHPS/PDGFB/SOS2/CD276/IFNG/HRG/RPS6KA1/CD80/CDKN1A/AP3B1/SPINK5/TESPA1/ADAMTS18/XCL1/ZEB1/SCGB1A1/FER/MERTK/TNFRSF14/DMTN/ABR/CYGB/TNFSF13/NLRP3/AP1G1/TMIGD2/SELP/LEP/YES1/HLA-DQB1/FES/LCK/CD55/IFNL3/CARD11/HLA-DRA/LST1	43
BP	GO:0019395	fatty acid oxidation	13/1045	91/16266	0.00528529	0.202146	PRKAG2/PPARGC1A/CPT1A/MAPK14/ACADL/SCP2/ACADM/IVD/ETFA/ACOXL/CYGB/LEP/CPT1B	13
BP	GO:0033559	unsaturated fatty acid metabolic process	15/1045	112/16266	0.005303	0.202146	MGLL/GGT1/GGTLC2/GGTLC1/GGT2/CYP2D6/AVP/ABCC1/PTGDS/SCP2/CYP1A1/CYP2S1/CYP4F2/CYP4F3/CYP2B6	15
BP	GO:0071214	cellular response to abiotic stimulus	28/1045	261/16266	0.0053693	0.202146	GUCA1A/HDAC4/DNM2/REST/CRYAB/MAPK14/GNAT1/MYOG/HVCN1/CDKN1A/FIGNL1/SCN2A/CASP1/RHBDD1/TLK2/RAD9B/PTPRK/CALM2/CALM3/TLR3/CTSB/DDIAS/SFTPC/MYD88/PDE2A/MYO6/CNGA1/CRIP1	28
BP	GO:1903409	reactive oxygen species biosynthetic process	12/1045	81/16266	0.00538286	0.202146	SLC7A2/HDAC4/RAB27A/DNM2/ACP5/IFNG/PTK2B/ASS1/GCHFR/CYP1A1/EGFR/NOS1AP	12
BP	GO:0071241	cellular response to inorganic substance	18/1045	145/16266	0.00543105	0.202146	FSTL3/DNM2/PPARGC1A/SLC11A2/MYOG/HVCN1/SERPINF1/CARF/ANK3/DMTN/ATP13A2/B2M/SFTPC/TH/GRIN2A/SCN5A/HMBS/ZNF658	18
BP	GO:0019722	calcium-mediated signaling	17/1045	134/16266	0.00545067	0.202146	CD4/IGF1/HDAC4/TREM2/RCAN3/PTK2B/NFATC1/EGFR/NTRK2/NRG1/DMTN/CALM2/CALM3/SELP/PLCG2/L1CAM/DMD	17
BP	GO:0050999	regulation of nitric-oxide synthase activity	8/1045	43/16266	0.00547181	0.202146	DNM2/PTK2B/GCHFR/EGFR/CALM2/CALM3/CYGB/NOS1AP	8
BP	GO:0010035	response to inorganic substance	43/1045	448/16266	0.00548124	0.202146	CD9/CPS1/CAMK2B/FSTL3/DNM2/AREG/PPARGC1A/CRYAB/SLC11A2/SLC30A3/IL1R1/PTK2B/MYOG/HVCN1/ASS1/SERPINF1/CD36/APTX/CARF/CYP1A1/SCGB1A1/ANK3/PTH/KCNMA1/SLC6A1/FANCC/DMTN/ATP13A2/CALM2/CALM3/B2M/SFTPC/BDNF/TH/D2HGDH/LCK/GRIN2A/SCN5A/PTCH1/RXRA/CRIP1/HMBS/ZNF658	43
BP	GO:0014733	regulation of skeletal muscle adaptation	4/1045	12/16266	0.00552642	0.202146	GTF2IRD1/CAMK2B/TNNT1/TNNI1	4
BP	GO:0045820	negative regulation of glycolytic process	4/1045	12/16266	0.00552642	0.202146	HDAC4/PPARGC1A/MYOG/CBFA2T3	4
BP	GO:0072329	monocarboxylic acid catabolic process	14/1045	102/16266	0.0055785	0.202469	LIPE/PRODH/PON3/CPT1A/ACADL/SCP2/ACADM/IVD/ETFA/ACOXL/LEP/CYP4F2/CYP4F3/CPT1B	14
BP	GO:0010771	negative regulation of cell morphogenesis involved in differentiation	13/1045	92/16266	0.00580297	0.205523	IFRD1/PSEN1/HPN/KANK1/SEMA5A/BCL11A/EPHB2/DAB2IP/DMTN/DRAXIN/LDLRAD4/PTK2/DCC	13
BP	GO:0033138	positive regulation of peptidyl-serine phosphorylation	13/1045	92/16266	0.00580297	0.205523	CD44/PFN2/AVP/IFNG/DOCK7/TRIM6/ARRB2/HAX1/NTRK2/BDNF/SMYD3/IFNA10/IFNA4	13
BP	GO:0045978	negative regulation of nucleoside metabolic process	5/1045	19/16266	0.00590754	0.205523	MLXIPL/HDAC4/PPARGC1A/MYOG/CBFA2T3	5
BP	GO:0097066	response to thyroid hormone	5/1045	19/16266	0.00590754	0.205523	CTSH/HPN/PPARGC1A/CTSB/GAS2L1	5
BP	GO:1903579	negative regulation of ATP metabolic process	5/1045	19/16266	0.00590754	0.205523	MLXIPL/HDAC4/PPARGC1A/MYOG/CBFA2T3	5
BP	GO:0022409	positive regulation of cell-cell adhesion	25/1045	227/16266	0.00592601	0.205523	CD4/IGF1/CD44/AP3D1/FSTL3/DHPS/CD276/IFNG/CD80/AP3B1/TESPA1/FLOT1/XCL1/MYO10/TNFRSF14/DMTN/NLRP3/TMIGD2/YES1/HLA-DQB1/LCK/CD55/CARD11/L1CAM/HLA-DRA	25
BP	GO:1904589	regulation of protein import	20/1045	169/16266	0.00600709	0.206803	IGF1/FBXW11/ZNF268/KANK1/MAPK14/MDFI/SEMA5A/AKAP1/CDKN1A/CD36/DAB2IP/SMAD4/EGFR/GNAQ/NLRP3/TLR3/LEP/PARP10/PDE2A/POU5F1	20
BP	GO:1902743	regulation of lamellipodium organization	7/1045	35/16266	0.00609241	0.208209	HDAC4/DNM2/KANK1/HRG/RREB1/FER/DMTN	7
BP	GO:0050771	negative regulation of axonogenesis	8/1045	44/16266	0.0063197	0.214238	IFRD1/PSEN1/SEMA5A/BCL11A/EPHB2/DRAXIN/PTK2/DCC	8
BP	GO:0034440	lipid oxidation	13/1045	93/16266	0.00636032	0.214238	PRKAG2/PPARGC1A/CPT1A/MAPK14/ACADL/SCP2/ACADM/IVD/ETFA/ACOXL/CYGB/LEP/CPT1B	13
BP	GO:1900542	regulation of purine nucleotide metabolic process	23/1045	205/16266	0.00649046	0.215845	MLXIPL/IGF1/GUCA1A/CALCRL/HDAC4/GNAS/PTHLH/AVP/PRKAG2/PPARGC1A/PDE4D/PTK2B/ADCY7/MYOG/CBFA2T3/VIP/NTRK2/PTH/CALM2/CALM3/OXER1/PDE2A/GRM7	23
BP	GO:0003012	muscle system process	35/1045	351/16266	0.00650024	0.215845	GTF2IRD1/IGF1/MAP2K3/CAMK2B/CALCRL/HDAC4/TNNT1/CAMTA2/MYH1/CRYAB/PDE4D/AKAP1/MYOG/CKMT2/DTNA/SULF1/CHRNA1/ALDOA/SORBS2/KCNMA1/TNNI1/CALM2/CALM3/SLMAP/PI16/TPM4/GDNF/LEP/KCNB2/LCK/SCN5A/STAC3/MYH6/DMD/FXYD1	35
BP	GO:0009062	fatty acid catabolic process	12/1045	83/16266	0.00655679	0.216189	LIPE/CPT1A/ACADL/SCP2/ACADM/IVD/ETFA/ACOXL/LEP/CYP4F2/CYP4F3/CPT1B	12
BP	GO:0045664	regulation of neuron differentiation	45/1045	479/16266	0.00669934	0.219345	IFRD1/PAX6/GRN/CAMK2B/CDON/CBFA2T2/DNM2/RIMS1/PSEN1/REST/NRCAM/PQBP1/NDRG4/EYA1/KANK1/PRPF19/IFNG/SEMA5A/EPHA4/BCL11A/PTK2B/UNC13A/SERPINF1/EPHB2/DAB2IP/CPNE9/GOLGA4/NTRK2/ZEB1/LRRC4C/DRAXIN/EOMES/PTK2/RIMS2/BDNF/FES/ROBO2/DCC/TCF4/SMURF1/OPA1/L1CAM/DMD/PLXNA4/ETV5	45
BP	GO:0007270	neuron-neuron synaptic transmission	17/1045	137/16266	0.00680006	0.221096	PSEN1/NAPA/DNM1/PTK2B/UNC13A/STXBP1/FLOT1/ARRB2/GRIK4/GRIA1/SLC6A1/DGKI/GDNF/BDNF/TH/GRIN2A/GRM7	17
BP	GO:0030032	lamellipodium assembly	9/1045	54/16266	0.00699702	0.225002	HDAC4/DNM2/ABLIM1/HRG/AJUBA/ARHGEF4/FER/DMTN/SH2B1	9
BP	GO:0030098	lymphocyte differentiation	31/1045	303/16266	0.0070163	0.225002	PGLYRP1/CD4/POU2F2/AP3D1/HDAC4/SOS2/TNFSF8/IFNG/FOXP1/BCL11A/PTK2B/CD80/POLM/RUNX2/AP3B1/SPINK5/TESPA1/ZEB1/ITGB1/MERTK/NLRP3/EOMES/B2M/LY6D/LCK/JAG2/IFNA10/SEMA4A/PLCG2/CARD11/IFNA4	31
BP	GO:0060603	mammary gland duct morphogenesis	7/1045	36/16266	0.00715268	0.22701	PTHLH/AREG/SOSTDC1/CSF1/PTCH1/DDR1/ETV5	7
BP	GO:0051384	response to glucocorticoid	18/1045	149/16266	0.00719121	0.22701	CPS1/SLC9A3/REST/ACSBG1/PTGDS/AREG/CDKN1A/ASS1/SERPINF1/SCGB1A1/HNMT/CALM2/CALM3/SFTPC/TH/SMYD3/RXRA/HMBS	18
BP	GO:0046928	regulation of neurotransmitter secretion	8/1045	45/16266	0.00726355	0.22701	SNCAIP/PFN2/CAMK2A/RIMS1/NAPA/KCNC4/UNC13A/STXBP1	8
BP	GO:0000052	citrulline metabolic process	4/1045	13/16266	0.0075813	0.22701	CPS1/PADI2/ASS1/PADI6	4
BP	GO:0010801	negative regulation of peptidyl-threonine phosphorylation	4/1045	13/16266	0.0075813	0.22701	DMTN/CALM2/CALM3/SPRED2	4
BP	GO:0046710	GDP metabolic process	4/1045	13/16266	0.0075813	0.22701	MPP2/MPP1/CASK/CARD11	4
BP	GO:0051195	negative regulation of cofactor metabolic process	4/1045	13/16266	0.0075813	0.22701	HDAC4/PPARGC1A/MYOG/CBFA2T3	4
BP	GO:0051198	negative regulation of coenzyme metabolic process	4/1045	13/16266	0.0075813	0.22701	HDAC4/PPARGC1A/MYOG/CBFA2T3	4
BP	GO:0097067	cellular response to thyroid hormone stimulus	4/1045	13/16266	0.0075813	0.22701	CTSH/PPARGC1A/CTSB/GAS2L1	4
BP	GO:2000651	positive regulation of sodium ion transmembrane transporter activity	4/1045	13/16266	0.0075813	0.22701	DNM2/ANK3/WNK2/DMD	4
BP	GO:0006836	neurotransmitter transport	22/1045	196/16266	0.00761227	0.22701	NRXN3/SNCAIP/PFN2/CAMK2A/RIMS1/PSEN1/NAPA/SLC1A2/KCNC4/SV2C/SYT5/UNC13A/PPFIA1/STXBP1/CASK/SYT8/SLC6A1/SYN2/DGKI/GDNF/RIMS2/DOC2B	22
BP	GO:0032770	positive regulation of monooxygenase activity	6/1045	28/16266	0.00769602	0.228056	IFNG/PTK2B/CALM2/CALM3/GDNF/NOS1AP	6
BP	GO:1903533	regulation of protein targeting	30/1045	293/16266	0.00782207	0.230333	IGF1/FBXW11/ZNF268/KANK1/MAPK14/MDFI/SEMA5A/AKAP1/CDKN1A/CD36/DAB2IP/PRELID3A/SMAD4/HAX1/EGFR/HNMT/GNAQ/NRG1/DMTN/NLRP3/TLR3/MFF/DTWD2/LEP/PARP10/PDE2A/IFNL3/MYO1C/POU5F1/WDR46	30
BP	GO:0006165	nucleoside diphosphate phosphorylation	12/1045	85/16266	0.00792394	0.230546	MLXIPL/IGF1/HDAC4/ENO1/PRKAG2/ENO3/PPARGC1A/MYOG/CBFA2T3/CMPK2/ALDOA/HK1	12
BP	GO:0051494	negative regulation of cytoskeleton organization	15/1045	117/16266	0.00792777	0.230546	PFN2/KANK1/GMFG/PPFIA1/TRIM54/BBS4/TBCD/EPS8/DMTN/C16orf45/FAM21C/GAS2L1/ESPN/CAPZA2/GAS2L2	15
BP	GO:0060560	developmental growth involved in morphogenesis	22/1045	199/16266	0.00904094	0.261294	IFRD1/GAL/DNM2/RIMS1/PTHLH/NRCAM/AREG/SEMA5A/BCL11A/UNC13A/CPNE9/GOLGA4/ITGB1/DRAXIN/RIMS2/BDNF/CSF1/DCC/SLC9A6/SMURF1/L1CAM/PLXNA4	22
BP	GO:0006140	regulation of nucleotide metabolic process	23/1045	211/16266	0.00909893	0.261357	MLXIPL/IGF1/GUCA1A/CALCRL/HDAC4/GNAS/PTHLH/AVP/PRKAG2/PPARGC1A/PDE4D/PTK2B/ADCY7/MYOG/CBFA2T3/VIP/NTRK2/PTH/CALM2/CALM3/OXER1/PDE2A/GRM7	23
BP	GO:0018200	peptidyl-glutamic acid modification	6/1045	29/16266	0.00918742	0.262161	FOLH1/FOLH1B/CEP41/F10/AGBL3/PROS1	6
BP	GO:0009617	response to bacterium	45/1045	488/16266	0.00923889	0.262161	PGLYRP1/CD4/CPS1/TNIP3/TREM2/ACP5/CACTIN/TNFSF8/IFNG/MAPK14/PDE4D/FOXP1/TRIM6/CD80/LIAS/CFP/ASS1/CMPK2/CD36/DAB2IP/CASP1/CYP1A1/REN/REG3G/VIP/SCGB1A1/FER/TNFRSF14/ABR/NLRP3/IL24/TLR3/B2M/LALBA/SFTPC/MYD88/SELP/TH/DEFB119/PLA2G6/PROS1/SIGIRR/CD55/ADH5/PLCG2	45
BP	GO:0031589	cell-substrate adhesion	30/1045	297/16266	0.00939811	0.26488	CD44/ACTN1/ITGA8/DNM2/KANK1/C1QBP/HRG/PTK2B/RREB1/SGCE/AJUBA/PPFIA1/MEN1/CD36/ITGB7/TBCD/CASK/ITGB1/FER/PTPRK/BCL2L11/MERTK/ABI3BP/DMTN/ADAMTS13/COL3A1/PTK2/FAM21C/CSF1/DDR1	30
BP	GO:0032890	regulation of organic acid transport	8/1045	47/16266	0.00946495	0.26488	AVP/TMEM27/SLC6A1/SEPT2/LEP/CYP4F2/GRM7/FXYD1	8
BP	GO:0007229	integrin-mediated signaling pathway	12/1045	87/16266	0.00950473	0.26488	CTNNA1/ITGA8/CEACAM1/PTK2B/PLP1/ITGB7/ITGA9/ITGB1/DMTN/ADAMTS13/COL3A1/PTK2	12
BP	GO:0002757	immune response-activating signal transduction	42/1045	450/16266	0.00957211	0.26488	PGLYRP1/CD4/PRKCH/MAP2K3/TNIP3/FBXW11/PSEN1/FYB/CACTIN/C1QBP/MAPK10/MAPK14/PDE4D/RPS6KA1/FFAR2/NFATC1/CD36/TESPA1/DAB2IP/FLOT1/CMTM3/ARRB2/FCGR2A/REG3G/MYO10/UBC/ELMO1/CALM2/CALM3/TLR3/CTSB/PTK2/MYD88/GCSAM/YES1/HLA-DQB1/LCK/PLA2G6/MYO1C/PLCG2/CARD11/HLA-DRA	42
BP	GO:0030811	regulation of nucleotide catabolic process	7/1045	38/16266	0.00967417	0.26488	MLXIPL/IGF1/HDAC4/PRKAG2/PPARGC1A/MYOG/CBFA2T3	7
BP	GO:0045806	negative regulation of endocytosis	7/1045	38/16266	0.00967417	0.26488	PICALM/PACSIN2/UNC119/APOC3/APOC1/SCAMP5/ATXN2	7
BP	GO:0034446	substrate adhesion-dependent cell spreading	11/1045	77/16266	0.00987274	0.265178	ITGA8/DNM2/KANK1/C1QBP/RREB1/ITGB7/FER/MERTK/DMTN/PTK2/FAM21C	11
BP	GO:0046031	ADP metabolic process	11/1045	77/16266	0.00987274	0.265178	MLXIPL/IGF1/HDAC4/ENO1/PRKAG2/ENO3/PPARGC1A/MYOG/CBFA2T3/ALDOA/HK1	11
BP	GO:0051588	regulation of neurotransmitter transport	9/1045	57/16266	0.009974	0.265178	SNCAIP/PFN2/CAMK2A/RIMS1/NAPA/KCNC4/UNC13A/STXBP1/GDNF	9
BP	GO:0019935	cyclic-nucleotide-mediated signaling	10/1045	67/16266	0.0100626	0.265178	GAL/GNAS/PDE4D/UBE2B/PTK2B/ADCY7/CD36/EPHA5/RIMS2/PDE2A	10
BP	GO:0036037	CD8-positive, alpha-beta T cell activation	4/1045	14/16266	0.0100815	0.265178	TNFSF8/IFNG/XCL1/EOMES	4
BP	GO:0050857	positive regulation of antigen receptor-mediated signaling pathway	4/1045	14/16266	0.0100815	0.265178	PRKCH/TESPA1/CMTM3/LCK	4
BP	GO:1902001	fatty acid transmembrane transport	4/1045	14/16266	0.0100815	0.265178	SLC27A5/PRKAG2/CPT1A/CPT1B	4
BP	GO:0010038	response to metal ion	30/1045	300/16266	0.0107439	0.27954	CPS1/CAMK2B/FSTL3/SLC11A2/SLC30A3/PTK2B/MYOG/HVCN1/ASS1/SERPINF1/CARF/CYP1A1/ANK3/PTH/KCNMA1/SLC6A1/DMTN/ATP13A2/CALM2/CALM3/B2M/BDNF/TH/D2HGDH/LCK/GRIN2A/SCN5A/CRIP1/HMBS/ZNF658	30
BP	GO:0035051	cardiocyte differentiation	14/1045	110/16266	0.010747	0.27954	ATG5/REST/FOLR1/POPDC2/PRICKLE1/SMAD4/ITGB1/SORBS2/NRG1/EOMES/PI16/RXRA/MYH6/POU5F1	14
BP	GO:0048592	eye morphogenesis	17/1045	144/16266	0.0110091	0.284776	PROM1/PAX6/SLC4A7/CDON/RPGRIP1/VSX1/GNAT1/EPHB2/STRA6/BBS4/CNGA3/NTRK2/ZEB1/RDH13/IFT122/BDNF/TH	17
BP	GO:0014888	striated muscle adaptation	7/1045	39/16266	0.0111531	0.286917	GTF2IRD1/CAMK2B/HDAC4/TNNT1/CAMTA2/MYOG/TNNI1	7
BP	GO:0035725	sodium ion transmembrane transport	16/1045	133/16266	0.0112919	0.2889	SLC4A7/SLC9A7/SLC9A3/DNM2/FXYD3/SLC17A2/SCN2A/FXYD4/ANK3/SCN3A/WNK2/SCN5A/SLC4A5/SLC9A6/DMD/FXYD1	16
BP	GO:0043501	skeletal muscle adaptation	5/1045	22/16266	0.0114003	0.290089	GTF2IRD1/CAMK2B/TNNT1/MYOG/TNNI1	5
BP	GO:0035239	tube morphogenesis	35/1045	366/16266	0.0120492	0.304298	IGF1/CD44/PSEN1/PTHLH/NDRG4/CTSH/EYA1/AREG/FOLR1/SEMA5A/FOXP1/EPHA4/LIAS/MICAL2/MYCN/DAB2IP/STRA6/SHROOM3/PRICKLE1/BBS4/SMAD4/EGFR/KDM6A/ZEB1/BCL2L11/DVL3/IFT122/GDNF/SOSTDC1/PPP1CA/CSF1/PTCH1/OPA1/DDR1/ETV5	35
BP	GO:0031960	response to corticosteroid	18/1045	157/16266	0.0120887	0.304298	CPS1/SLC9A3/REST/ACSBG1/PTGDS/AREG/CDKN1A/ASS1/SERPINF1/SCGB1A1/HNMT/CALM2/CALM3/SFTPC/TH/SMYD3/RXRA/HMBS	18
BP	GO:1904064	positive regulation of cation transmembrane transport	10/1045	69/16266	0.012299	0.30688	GAL/DNM2/ANK3/CALM2/CALM3/WNK2/PLCG2/NOS1AP/DMD/FXYD1	10
BP	GO:0046939	nucleotide phosphorylation	12/1045	90/16266	0.0123224	0.30688	MLXIPL/IGF1/HDAC4/ENO1/PRKAG2/ENO3/PPARGC1A/MYOG/CBFA2T3/CMPK2/ALDOA/HK1	12
BP	GO:0002718	regulation of cytokine production involved in immune response	9/1045	59/16266	0.0124314	0.307957	ATG5/TRIM6/FFAR2/CD36/XCL1/TNFRSF14/NLRP3/TLR3/B2M	9
BP	GO:0034112	positive regulation of homotypic cell-cell adhesion	21/1045	193/16266	0.0125427	0.309078	CD4/IGF1/CD44/AP3D1/DHPS/CD276/IFNG/CD80/AP3B1/TESPA1/XCL1/TNFRSF14/DMTN/NLRP3/TMIGD2/YES1/HLA-DQB1/LCK/CD55/CARD11/HLA-DRA	21
BP	GO:1900024	regulation of substrate adhesion-dependent cell spreading	7/1045	40/16266	0.0127892	0.311778	DNM2/KANK1/C1QBP/RREB1/DMTN/PTK2/FAM21C	7
BP	GO:0051186	cofactor metabolic process	33/1045	342/16266	0.0127955	0.311778	NADK/MLXIPL/IGF1/HDAC4/ENO1/MCCC1/FOLH1/COQ9/PRKAG2/PNPO/ENO3/PPARGC1A/FOLR1/SLC11A2/MVK/VNN2/LIAS/MYOG/CBFA2T3/SUCLA2/SLC5A6/CYP1A1/ALDOA/HK1/NMNAT3/BTD/CYP4F2/TPK1/ADH4/ASPDH/CRYZL1/ACSM4/HMBS	33
BP	GO:0007266	Rho protein signal transduction	18/1045	158/16266	0.012852	0.311778	SOS2/KANK1/APOC3/ROPN1B/PLEKHG1/EPS8L1/ARHGEF9/ARHGEF4/FLOT1/PAK6/CNKSR1/ITGB1/PTH/OBSCN/ABR/COL3A1/ADGRG1/STRADA	18
BP	GO:0034109	homotypic cell-cell adhesion	45/1045	498/16266	0.0129548	0.312652	CD4/ZBTB32/IGF1/CD44/AP3D1/RAB27A/PSEN1/GNAS/DHPS/SOS2/CD276/TNFSF8/IFNG/PRLR/FOXP1/BCL11A/CD80/RUNX2/AP3B1/SPINK5/TESPA1/STXBP1/ADAMTS18/IFNAR1/XCL1/ZEB1/SCGB1A1/TNFRSF14/DMTN/NLRP3/EOMES/B2M/TMIGD2/YES1/HLA-DQB1/LCK/JAG2/IFNA10/SEMA4A/CD55/IFNL3/CARD11/L1CAM/HLA-DRA/IFNA4	45
BP	GO:0010744	positive regulation of macrophage derived foam cell differentiation	4/1045	15/16266	0.0130598	0.31357	PRKCH/MSR1/CD36/CSF1	4
BP	GO:1990267	response to transition metal nanoparticle	15/1045	124/16266	0.0132341	0.316132	CPS1/SLC11A2/SLC30A3/HVCN1/ASS1/CYP1A1/ATP13A2/B2M/TH/D2HGDH/LCK/GRIN2A/CRIP1/HMBS/ZNF658	15
BP	GO:0048675	axon extension	12/1045	91/16266	0.0133913	0.317917	IFRD1/DNM2/NRCAM/SEMA5A/BCL11A/GOLGA4/ITGB1/DRAXIN/BDNF/SLC9A6/L1CAM/PLXNA4	12
BP	GO:0002367	cytokine production involved in immune response	10/1045	70/16266	0.0135484	0.317917	ATG5/TRIM6/FFAR2/CD36/XCL1/TNFRSF14/NLRP3/TLR3/B2M/CD55	10
BP	GO:0030516	regulation of axon extension	10/1045	70/16266	0.0135484	0.317917	IFRD1/DNM2/NRCAM/SEMA5A/BCL11A/GOLGA4/DRAXIN/BDNF/L1CAM/PLXNA4	10
BP	GO:0032655	regulation of interleukin-12 production	8/1045	50/16266	0.0136483	0.317917	ACP5/C1QBP/IFNG/MAPK14/FOXP1/CD36/ARRB2/TLR3	8
BP	GO:0033059	cellular pigmentation	8/1045	50/16266	0.0136483	0.317917	AP3D1/RAB27A/AP3B1/SHROOM3/BBS4/AP1G1/PMEL/DCTN1	8
BP	GO:0006809	nitric oxide biosynthetic process	9/1045	60/16266	0.0138167	0.320247	SLC7A2/DNM2/ACP5/IFNG/PTK2B/ASS1/GCHFR/EGFR/NOS1AP	9
BP	GO:0072330	monocarboxylic acid biosynthetic process	22/1045	207/16266	0.0139348	0.321393	MLXIPL/CYP46A1/MSMO1/DHRS9/MGLL/SLC27A5/GGT1/GGTLC2/GGTLC1/GGT2/AVP/PRKAG2/PTGDS/APOC3/SCAP/ACADL/SCP2/ACADM/LIAS/PLP1/APOC1/CYP1A1	22
BP	GO:0006941	striated muscle contraction	15/1045	125/16266	0.0141761	0.323011	MAP2K3/HDAC4/TNNT1/PDE4D/DTNA/CHRNA1/ALDOA/TNNI1/CALM2/CALM3/SCN5A/STAC3/MYH6/DMD/FXYD1	15
BP	GO:0071248	cellular response to metal ion	15/1045	125/16266	0.0141761	0.323011	FSTL3/SLC11A2/MYOG/HVCN1/SERPINF1/CARF/ANK3/DMTN/ATP13A2/B2M/TH/GRIN2A/SCN5A/HMBS/ZNF658	15
BP	GO:0061387	regulation of extent of cell growth	11/1045	81/16266	0.0142119	0.323011	IFRD1/DNM2/NRCAM/SEMA5A/BCL11A/GOLGA4/DRAXIN/BDNF/DCC/L1CAM/PLXNA4	11
BP	GO:0007338	single fertilization	14/1045	114/16266	0.0144523	0.326888	CD9/CAMK2B/HOXA9/CATSPERG/GNPDA1/ROPN1B/SLIRP/HVCN1/TARBP2/SYT8/CAST/CDK1/WEE2/NOX5	14
BP	GO:0070486	leukocyte aggregation	40/1045	436/16266	0.0146432	0.329613	CD4/ZBTB32/IGF1/CD44/AP3D1/RAB27A/PSEN1/DHPS/SOS2/CD276/TNFSF8/IFNG/PRLR/FOXP1/BCL11A/CD80/RUNX2/AP3B1/SPINK5/TESPA1/IFNAR1/XCL1/ZEB1/SCGB1A1/TNFRSF14/NLRP3/EOMES/B2M/TMIGD2/YES1/HLA-DQB1/LCK/JAG2/IFNA10/SEMA4A/CD55/IFNL3/CARD11/HLA-DRA/IFNA4	40
BP	GO:0006766	vitamin metabolic process	16/1045	137/16266	0.0147237	0.32984	NADK/MCCC1/ACP5/ABCC1/PNPO/FOLR1/IFNG/VNN2/SLC5A6/CYP1A1/NMNAT3/BTD/TCN2/CYP4F2/RXRA/TPK1	16
BP	GO:0046579	positive regulation of Ras protein signal transduction	6/1045	32/16266	0.0148832	0.330416	IGF1/NRG1/DGKI/COL3A1/CSF1/ADGRG1	6
BP	GO:0019226	transmission of nerve impulse	10/1045	71/16266	0.0148906	0.330416	NRCAM/AVP/IFNG/SCN2A/CHRNA1/ANK3/SCN3A/KCNMA1/SCN5A/GRM7	10
BP	GO:0002440	production of molecular mediator of immune response	17/1045	149/16266	0.0151144	0.331213	POU2F2/ATG5/POLB/IFNG/MSH3/TRIM6/POLM/FFAR2/CD36/XCL1/TNFRSF14/TNFSF13/NLRP3/TLR3/B2M/HLA-DQB1/CD55	17
BP	GO:0071396	cellular response to lipid	36/1045	385/16266	0.0151943	0.331213	CPS1/TNIP3/REST/GNAS/CACTIN/PPARGC1A/CPT1A/IFNG/MAPK14/PDE4D/ESRRB/PTK2B/CD80/MYOG/FFAR2/ASS1/SERPINF1/WBP2/CMPK2/CD36/DAB2IP/EGFR/NLRP3/IL24/B2M/WNT10B/KAT5/LEP/YES1/GRIN2A/SIGIRR/SMYD3/PTCH1/RXRA/CD55/HMBS	36
BP	GO:0032615	interleukin-12 production	8/1045	51/16266	0.0153033	0.331213	ACP5/C1QBP/IFNG/MAPK14/FOXP1/CD36/ARRB2/TLR3	8
BP	GO:0032414	positive regulation of ion transmembrane transporter activity	9/1045	61/16266	0.015313	0.331213	GAL/DNM2/ANK3/CALM2/CALM3/WNK2/PLCG2/NOS1AP/DMD	9
BP	GO:1903426	regulation of reactive oxygen species biosynthetic process	9/1045	61/16266	0.015313	0.331213	HDAC4/RAB27A/DNM2/ACP5/IFNG/PTK2B/ASS1/EGFR/NOS1AP	9
BP	GO:0051271	negative regulation of cellular component movement	22/1045	209/16266	0.0154391	0.331213	CTNNA1/PFN2/ACTN1/NDRG4/HAS1/KANK1/PPARGC1A/SEMA5A/HRG/PADI2/SERPINF1/DAB2IP/SULF1/PTPRK/ABR/CYGB/IL24/C16orf45/COL3A1/LDLRAD4/GCSAM/ADGRG1	22
BP	GO:0045445	myoblast differentiation	11/1045	82/16266	0.0154924	0.331213	IFRD1/IGF1/REST/MAPK14/MYOG/PRICKLE1/TCF7L2/MBNL1/CAST/NRG1/WNT10B	11
BP	GO:0051897	positive regulation of protein kinase B signaling	11/1045	82/16266	0.0154924	0.331213	IGF1/THPO/C1QBP/SEMA5A/F10/ARRB2/HAX1/EGFR/TCF7L2/NRG1/PTK2	11
BP	GO:0046717	acid secretion	13/1045	104/16266	0.0157244	0.333206	RIMS1/AVP/SLC1A2/PPFIA1/STXBP1/SLC26A7/NTRK2/SLC6A1/BDNF/CYP4F2/GRM7/MYO6/STARD10	13
BP	GO:0051961	negative regulation of nervous system development	23/1045	222/16266	0.0160555	0.333206	IFRD1/PAX6/CTNNA1/CBFA2T2/PSEN1/REST/KANK1/PRPF19/IFNG/SEMA5A/EPHA4/BCL11A/EPHB2/MYCN/DRAXIN/IFT122/C16orf45/COL3A1/PTK2/BDNF/ROBO2/DCC/ADGRG1	23
BP	GO:0072524	pyridine-containing compound metabolic process	15/1045	127/16266	0.0162154	0.333206	NADK/MLXIPL/IGF1/HDAC4/ENO1/PRKAG2/PNPO/ENO3/PPARGC1A/MYOG/CBFA2T3/ALDOA/HK1/NMNAT3/ASPDH	15
BP	GO:0017156	calcium ion-dependent exocytosis	10/1045	72/16266	0.0163293	0.333206	RIMS1/REST/ROPN1B/SYT5/STXBP1/TMEM27/SYT8/RIMS2/SCAMP5/DOC2B	10
BP	GO:0021954	central nervous system neuron development	10/1045	72/16266	0.0163293	0.333206	LHX6/EPHA4/EPHB2/NTRK2/GNAQ/PTK2/LEP/ROBO2/DCC/PLXNA4	10
BP	GO:1900180	regulation of protein localization to nucleus	20/1045	186/16266	0.0164263	0.333206	IGF1/FBXW11/ZNF268/KANK1/MAPK14/MDFI/SEMA5A/AKAP1/CDKN1A/CD36/DAB2IP/SMAD4/EGFR/GNAQ/NLRP3/TLR3/LEP/PARP10/PDE2A/POU5F1	20
BP	GO:0008356	asymmetric cell division	4/1045	16/16266	0.0165442	0.333206	PAX6/DOCK7/POU5F1/ETV5	4
BP	GO:0030812	negative regulation of nucleotide catabolic process	4/1045	16/16266	0.0165442	0.333206	HDAC4/PPARGC1A/MYOG/CBFA2T3	4
BP	GO:0032011	ARF protein signal transduction	4/1045	16/16266	0.0165442	0.333206	CYTH4/CYTH1/IQSEC2/IQSEC1	4
BP	GO:0032012	regulation of ARF protein signal transduction	4/1045	16/16266	0.0165442	0.333206	CYTH4/CYTH1/IQSEC2/IQSEC1	4
BP	GO:0033158	regulation of protein import into nucleus, translocation	4/1045	16/16266	0.0165442	0.333206	IGF1/CDKN1A/PARP10/PDE2A	4
BP	GO:0050435	beta-amyloid metabolic process	5/1045	24/16266	0.0165471	0.333206	PICALM/PSEN1/UNC13A/REN/BACE2	5
BP	GO:2000649	regulation of sodium ion transmembrane transporter activity	7/1045	42/16266	0.0165663	0.333206	DNM2/FXYD3/FXYD4/ANK3/WNK2/DMD/FXYD1	7
BP	GO:0002521	leukocyte differentiation	41/1045	453/16266	0.016699	0.333206	PGLYRP1/CD4/POU2F2/AP3D1/HDAC4/FSTL3/PSEN1/GNAS/TREM2/SOS2/TNFSF8/IFNG/MAPK14/FOXP1/BCL11A/PTK2B/CD80/POLM/RUNX2/CBFA2T3/AP3B1/SPINK5/TESPA1/HAX1/ZEB1/ITGB1/MERTK/NLRP3/EOMES/TLR3/B2M/LY6D/LCK/CSF1/JAG2/PDE2A/IFNA10/SEMA4A/PLCG2/CARD11/IFNA4	41
BP	GO:0022412	cellular process involved in reproduction in multicellular organism	26/1045	260/16266	0.0167057	0.333206	CD9/IGF1/SMARCA2/CDC25B/PTGDS/SEPT4/DDX25/ROPN1B/UBE2B/SLIRP/PTK2B/DMRT1/TARBP2/BBS4/ARRB2/ZMYND15/RHBDD1/ITGB1/FANCC/DDIAS/PDILT/OSBP2/ROBO2/WEE2/ETV5/NOX5	26
BP	GO:0043270	positive regulation of ion transport	23/1045	223/16266	0.0168539	0.333206	GAL/CAMK2A/DNM2/PDGFB/AVP/ARRB2/XCL1/TMEM27/CASK/ANK3/SLC6A1/CALM2/CALM3/WNK2/B2M/GDNF/LEP/SCN5A/CYP4F2/PLCG2/NOS1AP/DMD/FXYD1	23
BP	GO:0034767	positive regulation of ion transmembrane transport	12/1045	94/16266	0.0170247	0.333206	GAL/DNM2/PDGFB/CASK/ANK3/CALM2/CALM3/WNK2/PLCG2/NOS1AP/DMD/FXYD1	12
BP	GO:0009161	ribonucleoside monophosphate metabolic process	25/1045	248/16266	0.0170616	0.333206	NADK/MLXIPL/IGF1/NDUFS1/HDAC4/ENO1/COQ9/ATP6V0A4/PRKAG2/ENO3/MPP2/PPARGC1A/MYOG/CBFA2T3/MPP1/COX4I1/FIGNL1/CASK/ALDOA/HK1/NDUFV1/BDNF/MYH6/CARD11/PRPS1L1	25
BP	GO:1902305	regulation of sodium ion transmembrane transport	8/1045	52/16266	0.0170988	0.333206	DNM2/FXYD3/FXYD4/ANK3/WNK2/SCN5A/DMD/FXYD1	8
BP	GO:0014904	myotube cell development	6/1045	33/16266	0.0172288	0.333206	IGF1/HDAC4/MYOG/WNT10B/SMYD3/STAC3	6
BP	GO:0043254	regulation of protein complex assembly	31/1045	324/16266	0.0172477	0.333206	BCLAF1/RNF4/PFN2/NAPA/KANK1/HRG/BCL11A/PTK2B/AJUBA/GMFG/ACTR3B/SPIRE1/DAB2IP/STXBP1/BBS4/TBCD/HAX1/TMEM27/FER/EPS8/BCL2L11/DMTN/FBLIM1/SOST/HIST3H3/LDLRAD4/WNT10B/FAM21C/SELP/FES/CAPZA2	31
BP	GO:0002526	acute inflammatory response	15/1045	128/16266	0.017316	0.333206	C1QBP/FFAR2/CFP/ASS1/PRCP/REG3G/AHSG/NLRP3/NUPR1/CD163/PROS1/SIGIRR/SERPINA3/CD55/CFI	15
BP	GO:0007612	learning	15/1045	128/16266	0.017316	0.333206	NRXN3/NDRG4/NPTX2/CHST10/FOXP2/EPHB2/STRA6/NTRK2/ITGB1/SLC6A1/DGKI/SHANK2/BDNF/TH/GRM7	15
BP	GO:0009167	purine ribonucleoside monophosphate metabolic process	24/1045	236/16266	0.0173898	0.333206	NADK/MLXIPL/IGF1/NDUFS1/HDAC4/ENO1/COQ9/ATP6V0A4/PRKAG2/ENO3/MPP2/PPARGC1A/MYOG/CBFA2T3/MPP1/COX4I1/FIGNL1/CASK/ALDOA/HK1/NDUFV1/BDNF/MYH6/CARD11	24
BP	GO:0042110	T cell activation	39/1045	428/16266	0.017436	0.333206	CD4/ZBTB32/IGF1/AP3D1/RAB27A/PSEN1/DHPS/SOS2/CD276/TNFSF8/IFNG/PRLR/FOXP1/BCL11A/CD80/RUNX2/AP3B1/SPINK5/TESPA1/IFNAR1/XCL1/ZEB1/SCGB1A1/TNFRSF14/NLRP3/EOMES/B2M/TMIGD2/YES1/HLA-DQB1/LCK/JAG2/IFNA10/SEMA4A/CD55/IFNL3/CARD11/HLA-DRA/IFNA4	39
BP	GO:0070489	T cell aggregation	39/1045	428/16266	0.017436	0.333206	CD4/ZBTB32/IGF1/AP3D1/RAB27A/PSEN1/DHPS/SOS2/CD276/TNFSF8/IFNG/PRLR/FOXP1/BCL11A/CD80/RUNX2/AP3B1/SPINK5/TESPA1/IFNAR1/XCL1/ZEB1/SCGB1A1/TNFRSF14/NLRP3/EOMES/B2M/TMIGD2/YES1/HLA-DQB1/LCK/JAG2/IFNA10/SEMA4A/CD55/IFNL3/CARD11/HLA-DRA/IFNA4	39
BP	GO:0042063	gliogenesis	22/1045	212/16266	0.0179329	0.340269	PAX6/CD9/IGF1/PRKCH/PRMT5/AREG/PRPF19/EPHA4/PTK2B/PLP1/MYRF/MYCN/DAB2IP/NTRK2/NRG1/C16orf45/SH3TC2/CDK1/CSF1/ADGRG1/ETV5/HMBS	22
BP	GO:0071593	lymphocyte aggregation	39/1045	429/16266	0.0180362	0.340269	CD4/ZBTB32/IGF1/AP3D1/RAB27A/PSEN1/DHPS/SOS2/CD276/TNFSF8/IFNG/PRLR/FOXP1/BCL11A/CD80/RUNX2/AP3B1/SPINK5/TESPA1/IFNAR1/XCL1/ZEB1/SCGB1A1/TNFRSF14/NLRP3/EOMES/B2M/TMIGD2/YES1/HLA-DQB1/LCK/JAG2/IFNA10/SEMA4A/CD55/IFNL3/CARD11/HLA-DRA/IFNA4	39
BP	GO:0010770	positive regulation of cell morphogenesis involved in differentiation	17/1045	152/16266	0.0180967	0.340269	CAMK2B/DNM2/C1QBP/SEMA5A/EPHA4/BCL11A/GLIPR2/RREB1/SMAD4/GOLGA4/NTRK2/TCF7L2/DMTN/GDNF/BDNF/ROBO2/L1CAM	17
BP	GO:0035023	regulation of Rho protein signal transduction	13/1045	106/16266	0.0181994	0.340269	SOS2/KANK1/APOC3/PLEKHG1/EPS8L1/ARHGEF9/ARHGEF4/FLOT1/ITGB1/OBSCN/ABR/COL3A1/ADGRG1	13
BP	GO:0009126	purine nucleoside monophosphate metabolic process	24/1045	237/16266	0.018215	0.340269	NADK/MLXIPL/IGF1/NDUFS1/HDAC4/ENO1/COQ9/ATP6V0A4/PRKAG2/ENO3/MPP2/PPARGC1A/MYOG/CBFA2T3/MPP1/COX4I1/FIGNL1/CASK/ALDOA/HK1/NDUFV1/BDNF/MYH6/CARD11	24
BP	GO:0002495	antigen processing and presentation of peptide antigen via MHC class II	12/1045	95/16266	0.018387	0.340269	DNM2/TREM2/AP1B1/KLC1/DCTN4/OSBPL1A/SAR1B/AP1G1/HLA-DQB1/AP1S2/HLA-DRA/DCTN1	12
BP	GO:0006767	water-soluble vitamin metabolic process	12/1045	95/16266	0.018387	0.340269	NADK/MCCC1/ACP5/ABCC1/PNPO/FOLR1/VNN2/SLC5A6/NMNAT3/BTD/TCN2/TPK1	12
BP	GO:0043473	pigmentation	12/1045	95/16266	0.018387	0.340269	AP3D1/RAB27A/DOCK7/AP3B1/SHROOM3/BBS4/BCL2L11/GNAQ/AP1G1/TH/PMEL/DCTN1	12
BP	GO:0014909	smooth muscle cell migration	7/1045	43/16266	0.0187235	0.343779	IGF1/HDAC4/PDGFB/NDRG4/PPARGC1A/PDE4D/DDR1	7
BP	GO:1903428	positive regulation of reactive oxygen species biosynthetic process	7/1045	43/16266	0.0187235	0.343779	HDAC4/RAB27A/DNM2/IFNG/ASS1/EGFR/NOS1AP	7
BP	GO:0009314	response to radiation	42/1045	470/16266	0.0188912	0.345502	GUCA1A/POLB/DNM2/NDRG4/EYA1/UNC119/MAPK10/CRYAB/APOC3/SLC1A2/PITPNM1/MAPK14/GNAT1/IL1R1/UBE2B/CDKN1A/FIGNL1/MEN1/STRA6/RHBDD1/EGFR/TLK2/ITGB1/RAD9B/PTPRK/GNAQ/CALM2/CALM3/RDH13/IVL/DDIAS/COL3A1/PPP1CA/KAT5/BDNF/TH/GRIN2A/RAD51D/EYS/BCO2/CNGA1/CRIP1	42
BP	GO:0071479	cellular response to ionizing radiation	8/1045	53/16266	0.019041	0.346888	DNM2/CRYAB/MAPK14/CDKN1A/FIGNL1/TLK2/RAD9B/DDIAS	8
BP	GO:0043500	muscle adaptation	10/1045	74/16266	0.019512	0.34916	GTF2IRD1/IGF1/CAMK2B/HDAC4/TNNT1/CAMTA2/AKAP1/MYOG/TNNI1/PI16	10
BP	GO:0033157	regulation of intracellular protein transport	34/1045	366/16266	0.019557	0.34916	IGF1/FBXW11/ZNF268/KANK1/MAPK14/MDFI/SEMA5A/SEC16B/AKAP1/CDKN1A/CD36/DAB2IP/PRELID3A/SMAD4/HAX1/EGFR/TCF7L2/HNMT/GNAQ/NRG1/DMTN/NLRP3/TLR3/MFF/SH3TC2/DTWD2/BRSK2/LEP/PARP10/PDE2A/IFNL3/MYO1C/POU5F1/WDR46	34
BP	GO:0010591	regulation of lamellipodium assembly	5/1045	25/16266	0.0196178	0.34916	HDAC4/DNM2/HRG/FER/DMTN	5
BP	GO:0048169	regulation of long-term neuronal synaptic plasticity	5/1045	25/16266	0.0196178	0.34916	CAMK2B/RIMS1/EPHB2/BDNF/GRIN2A	5
BP	GO:0050706	regulation of interleukin-1 beta secretion	5/1045	25/16266	0.0196178	0.34916	IFNG/FOXP1/CASP1/IFNAR1/NLRP3	5
BP	GO:0045981	positive regulation of nucleotide metabolic process	15/1045	130/16266	0.0196878	0.34916	MLXIPL/IGF1/GUCA1A/CALCRL/GNAS/PTHLH/AVP/PPARGC1A/ADCY7/MYOG/VIP/NTRK2/PTH/CALM2/CALM3	15
BP	GO:1900544	positive regulation of purine nucleotide metabolic process	15/1045	130/16266	0.0196878	0.34916	MLXIPL/IGF1/GUCA1A/CALCRL/GNAS/PTHLH/AVP/PPARGC1A/ADCY7/MYOG/VIP/NTRK2/PTH/CALM2/CALM3	15
BP	GO:0002504	antigen processing and presentation of peptide or polysaccharide antigen via MHC class II	12/1045	96/16266	0.0198293	0.349471	DNM2/TREM2/AP1B1/KLC1/DCTN4/OSBPL1A/SAR1B/AP1G1/HLA-DQB1/AP1S2/HLA-DRA/DCTN1	12
BP	GO:0048660	regulation of smooth muscle cell proliferation	11/1045	85/16266	0.0198546	0.349471	IGF1/CALCRL/HDAC4/PDGFB/NDRG4/PPARGC1A/IFNG/PDE4D/FOXP1/VIP/TCF7L2	11
BP	GO:0002702	positive regulation of production of molecular mediator of immune response	9/1045	64/16266	0.0205152	0.353587	IFNG/TRIM6/FFAR2/CD36/XCL1/TNFRSF14/TNFSF13/NLRP3/B2M	9
BP	GO:0010288	response to lead ion	4/1045	17/16266	0.020558	0.353587	SLC11A2/PTH/SLC6A1/HMBS	4
BP	GO:0018195	peptidyl-arginine modification	4/1045	17/16266	0.020558	0.353587	PRMT5/PADI2/PRMT7/PADI6	4
BP	GO:0045956	positive regulation of calcium ion-dependent exocytosis	4/1045	17/16266	0.020558	0.353587	STXBP1/TMEM27/SCAMP5/DOC2B	4
BP	GO:0048670	regulation of collateral sprouting	4/1045	17/16266	0.020558	0.353587	IFRD1/BCL11A/BDNF/DCC	4
BP	GO:0090201	negative regulation of release of cytochrome c from mitochondria	4/1045	17/16266	0.020558	0.353587	IGF1/AVP/ARRB2/OPA1	4
BP	GO:1901292	nucleoside phosphate catabolic process	13/1045	108/16266	0.0209576	0.353587	MLXIPL/IGF1/HDAC4/PDE4C/PRKAG2/PPARGC1A/PDE4D/GDA/MYOG/CBFA2T3/ENTPD1/PDE2A/ASPDH	13
BP	GO:0002065	columnar/cuboidal epithelial cell differentiation	15/1045	131/16266	0.0209624	0.353587	PAX6/SLC4A7/RAB27A/RFX3/C1GALT1/CDKN1A/MEN1/SHROOM3/GNAQ/KCNMA1/TMC1/YIPF6/JAG2/RXRA/MYO6	15
BP	GO:0050900	leukocyte migration	32/1045	342/16266	0.0209866	0.353587	CD44/CEACAM1/PDGFB/CCL22/C1QBP/IFNG/PDE4D/PADI2/PTK2B/CD244/CEACAM8/FFAR2/MPP1/ITGB7/XCL1/ITGA9/ITGB1/FER/EPS8/MERTK/SLC7A7/TNFRSF14/ABR/SELP/GCSAM/LEP/YES1/LCK/CSF1/PROS1/L1CAM/CCL14	32
BP	GO:0007601	visual perception	21/1045	203/16266	0.0210483	0.353587	PAX6/SLC4A7/SPATA7/GUCA1A/MYO9A/RIMS1/RPGRIP1/ABLIM1/VSX1/POU6F2/CDH23/UNC119/GRK7/GNAT1/BBS4/CNGA3/ADGRV1/TH/EYS/CNGA1/OPA1	21
BP	GO:0032651	regulation of interleukin-1 beta production	7/1045	44/16266	0.0210702	0.353587	ACP5/IFNG/FOXP1/CASP1/ARRB2/IFNAR1/NLRP3	7
BP	GO:0038083	peptidyl-tyrosine autophosphorylation	7/1045	44/16266	0.0210702	0.353587	PTK2B/FER/PTK2/YES1/FES/LCK/DDR1	7
BP	GO:0050766	positive regulation of phagocytosis	7/1045	44/16266	0.0210702	0.353587	RAB27A/DNM2/CD36/AHSG/MERTK/ABR/PROS1	7
BP	GO:0006633	fatty acid biosynthetic process	16/1045	143/16266	0.0213264	0.354079	MLXIPL/MSMO1/MGLL/GGT1/GGTLC2/GGTLC1/GGT2/AVP/PRKAG2/PTGDS/APOC3/SCAP/ACADL/LIAS/PLP1/APOC1	16
BP	GO:0030808	regulation of nucleotide biosynthetic process	16/1045	143/16266	0.0213264	0.354079	GUCA1A/CALCRL/GNAS/PTHLH/AVP/PPARGC1A/PTK2B/ADCY7/VIP/NTRK2/PTH/CALM2/CALM3/OXER1/PDE2A/GRM7	16
BP	GO:1900371	regulation of purine nucleotide biosynthetic process	16/1045	143/16266	0.0213264	0.354079	GUCA1A/CALCRL/GNAS/PTHLH/AVP/PPARGC1A/PTK2B/ADCY7/VIP/NTRK2/PTH/CALM2/CALM3/OXER1/PDE2A/GRM7	16
BP	GO:0019362	pyridine nucleotide metabolic process	14/1045	120/16266	0.0217616	0.35876	NADK/MLXIPL/IGF1/HDAC4/ENO1/PRKAG2/ENO3/PPARGC1A/MYOG/CBFA2T3/ALDOA/HK1/NMNAT3/ASPDH	14
BP	GO:0046496	nicotinamide nucleotide metabolic process	14/1045	120/16266	0.0217616	0.35876	NADK/MLXIPL/IGF1/HDAC4/ENO1/PRKAG2/ENO3/PPARGC1A/MYOG/CBFA2T3/ALDOA/HK1/NMNAT3/ASPDH	14
BP	GO:0046822	regulation of nucleocytoplasmic transport	21/1045	204/16266	0.0220982	0.36303	IGF1/FBXW11/ZNF268/KANK1/MAPK14/MDFI/SEMA5A/AKAP1/CDKN1A/CD36/DAB2IP/SMAD4/EGFR/TCF7L2/GNAQ/NLRP3/TLR3/LEP/PARP10/PDE2A/POU5F1	21
BP	GO:0007160	cell-matrix adhesion	20/1045	192/16266	0.0223981	0.366671	CD44/ACTN1/ITGA8/HRG/PTK2B/SGCE/AJUBA/PPFIA1/CD36/ITGB7/CASK/ITGB1/PTPRK/BCL2L11/DMTN/ADAMTS13/COL3A1/PTK2/CSF1/DDR1	20
BP	GO:0002768	immune response-regulating cell surface receptor signaling pathway	43/1045	489/16266	0.0225533	0.367926	CD4/PRKCH/CAMK2B/CAMK2A/FBXW11/PSEN1/FYB/PDGFB/CSF2RB/MAPK10/GAB1/PDE4D/CD80/CDKN1A/KIR2DL1/FFAR2/NFATC1/TESPA1/DAB2IP/CMTM3/KSR1/FCGR2A/MYO10/EGFR/NCAM1/UBC/FER/ELMO1/NRG1/NRG2/CALM2/CALM3/PTK2/GCSAM/YES1/HLA-DQB1/LCK/GRIN2A/PLA2G6/MYO1C/PLCG2/CARD11/HLA-DRA	43
BP	GO:0010799	regulation of peptidyl-threonine phosphorylation	6/1045	35/16266	0.0226557	0.368312	PRKAG2/TRIM6/DMTN/CALM2/CALM3/SPRED2	6
BP	GO:0045926	negative regulation of growth	22/1045	217/16266	0.0227782	0.369023	IFRD1/GAL/ENO1/SMARCA2/GNAS/CRYAB/IFNG/SEMA5A/HRG/BCL11A/CDKN1A/CD36/CGREF1/SMAD4/EI24/DRAXIN/PI16/PTK2/GAS2L1/PTCH1/DCC/ATXN2	22
BP	GO:0048489	synaptic vesicle transport	14/1045	121/16266	0.0232093	0.373245	GRN/AP3D1/RAB27A/PFN2/DNM2/RIMS1/PSEN1/NAPA/SYT5/UNC13A/AP3B1/STXBP1/SYT8/TH	14
BP	GO:0097480	establishment of synaptic vesicle localization	14/1045	121/16266	0.0232093	0.373245	GRN/AP3D1/RAB27A/PFN2/DNM2/RIMS1/PSEN1/NAPA/SYT5/UNC13A/AP3B1/STXBP1/SYT8/TH	14
BP	GO:0006066	alcohol metabolic process	35/1045	384/16266	0.023278	0.373245	ALDH3B1/IGF1/CYP46A1/MSMO1/DHRS9/LIPE/REST/ACHE/PRKAG2/MVK/IFNG/SCAP/PLCH1/ACADL/SCP2/LEPR/PTK2B/APOC1/SMPD4/CYP1A1/OSBPL1A/SLC44A3/KCNMA1/PLA2G2F/CALM2/CALM3/PPIP5K1/LEP/IP6K1/PLA2G6/RXRA/ADH5/PLCG2/ADH4/CELA3B	35
BP	GO:0009612	response to mechanical stimulus	20/1045	193/16266	0.0235375	0.375588	HDAC4/PKD2L2/HPN/MAPK14/PTK2B/FOXP2/CASP1/STRA6/TLR3/CTSB/TMC1/SOST/SFTPC/COL3A1/MYD88/BDNF/LCK/PTCH1/PDE2A/DMD	20
BP	GO:0050803	regulation of synapse structure or activity	22/1045	218/16266	0.0238582	0.375588	NRXN3/CAMK2B/CAMK2A/RIMS1/PSEN1/SRPX2/PTK2B/UNC13A/EPHB2/DAB2IP/STXBP1/NTRK2/GRIA1/DGKI/SHANK2/PTK2/BDNF/GRIN2A/ROBO2/SLITRK2/MYO6/ETV5	22
BP	GO:0031099	regeneration	18/1045	169/16266	0.0239894	0.375588	IFRD1/IGF1/CTNNA1/PRMT5/ENO3/FOLR1/MAPK14/EPHA4/MYOG/CDKN1A/IGFBP1/CAST/EIF4A1/WNT10B/RXRA/EYS/DDR1/HMBS	18
BP	GO:0060538	skeletal muscle organ development	18/1045	169/16266	0.0239894	0.375588	CDON/HDAC4/MAPK14/PLAGL1/MYOG/FOXP2/ASS1/FLOT1/STRA6/CHRNA1/MBNL1/EOMES/CTSB/WNT10B/NUPR1/BASP1/STAC3/DMD	18
BP	GO:0031345	negative regulation of cell projection organization	13/1045	110/16266	0.0240166	0.375588	IFRD1/PFN2/CBFA2T2/PSEN1/KANK1/SEMA5A/HRG/EPHA4/BCL11A/EPHB2/DRAXIN/PTK2/DCC	13
BP	GO:0060537	muscle tissue development	32/1045	346/16266	0.0242844	0.375588	IFRD1/ATG5/CDON/HDAC4/ITGA8/NDRG4/EYA1/PPARGC1A/MAPK14/PLAGL1/POPDC2/MYOG/FOXP2/FLOT1/STRA6/CHRNA1/PRICKLE1/ITGB1/MBNL1/SORBS2/NRG1/TNNI1/EOMES/PI16/CTSB/COL3A1/WNT10B/NUPR1/BDNF/STAC3/RXRA/MYH6	32
BP	GO:0006635	fatty acid beta-oxidation	9/1045	66/16266	0.0246237	0.375588	CPT1A/ACADL/SCP2/ACADM/IVD/ETFA/ACOXL/LEP/CPT1B	9
BP	GO:0042308	negative regulation of protein import into nucleus	9/1045	66/16266	0.0246237	0.375588	FBXW11/ZNF268/MDFI/AKAP1/CD36/DAB2IP/NLRP3/PARP10/PDE2A	9
BP	GO:1904590	negative regulation of protein import	9/1045	66/16266	0.0246237	0.375588	FBXW11/ZNF268/MDFI/AKAP1/CD36/DAB2IP/NLRP3/PARP10/PDE2A	9
BP	GO:1903039	positive regulation of leukocyte cell-cell adhesion	20/1045	194/16266	0.0247206	0.375588	CD4/IGF1/CD44/AP3D1/DHPS/CD276/IFNG/CD80/AP3B1/TESPA1/XCL1/TNFRSF14/NLRP3/TMIGD2/YES1/HLA-DQB1/LCK/CD55/CARD11/HLA-DRA	20
BP	GO:0042326	negative regulation of phosphorylation	35/1045	386/16266	0.0249166	0.375588	PAX6/MLXIPL/IGF1/WNK1/PPP2R5A/HDAC4/PSEN1/GCKR/CACTIN/PRKAG2/PPARGC1A/PDE4D/UBE2B/MYOG/CDKN1A/AJUBA/CBFA2T3/GADD45G/GMFG/SH3BP5/MEN1/DAB2IP/TARBP2/AHSG/GNAQ/DMTN/CALM2/CALM3/WNK2/LDLRAD4/SMYD3/AIDA/SPRED2/DMD/WEE2	35
BP	GO:0016053	organic acid biosynthetic process	28/1045	295/16266	0.0249618	0.375588	MLXIPL/CPS1/CYP46A1/MSMO1/DHRS9/MGLL/SLC27A5/DHPS/GGT1/GGTLC2/GGTLC1/GGT2/AVP/PRKAG2/PTGDS/APOC3/SCAP/ACADL/SCP2/ACADM/PADI2/LIAS/PLP1/APOC1/ASS1/SUCLA2/CYP1A1/PADI6	28
BP	GO:0046394	carboxylic acid biosynthetic process	28/1045	295/16266	0.0249618	0.375588	MLXIPL/CPS1/CYP46A1/MSMO1/DHRS9/MGLL/SLC27A5/DHPS/GGT1/GGTLC2/GGTLC1/GGT2/AVP/PRKAG2/PTGDS/APOC3/SCAP/ACADL/SCP2/ACADM/PADI2/LIAS/PLP1/APOC1/ASS1/SUCLA2/CYP1A1/PADI6	28
BP	GO:0030258	lipid modification	19/1045	182/16266	0.0250484	0.375588	AGK/PRKAG2/PPARGC1A/CPT1A/MAPK14/ACADL/SCP2/ACADM/IVD/APOC1/PIK3C2B/ETFA/PPAPDC1B/LPPR1/ACOXL/CYGB/LEP/IP6K1/CPT1B	19
BP	GO:0048659	smooth muscle cell proliferation	11/1045	88/16266	0.0250628	0.375588	IGF1/CALCRL/HDAC4/PDGFB/NDRG4/PPARGC1A/IFNG/PDE4D/FOXP1/VIP/TCF7L2	11
BP	GO:0060292	long term synaptic depression	4/1045	18/16266	0.0251196	0.375588	STXBP1/GRIA1/DGKI/SHANK2	4
BP	GO:0071157	negative regulation of cell cycle arrest	4/1045	18/16266	0.0251196	0.375588	MLXIPL/ZNF268/CAST/MDM4	4
BP	GO:0006733	oxidoreduction coenzyme metabolic process	15/1045	134/16266	0.0251615	0.375588	NADK/MLXIPL/IGF1/HDAC4/ENO1/COQ9/PRKAG2/ENO3/PPARGC1A/MYOG/CBFA2T3/ALDOA/HK1/NMNAT3/ASPDH	15
BP	GO:0048167	regulation of synaptic plasticity	15/1045	134/16266	0.0251615	0.375588	CAMK2B/CAMK2A/RIMS1/PSEN1/PTK2B/UNC13A/EPHB2/STXBP1/NTRK2/GRIA1/DGKI/SHANK2/BDNF/GRIN2A/MYO6	15
BP	GO:0001654	eye development	31/1045	334/16266	0.0251841	0.375588	ABCB5/PROM1/PAX6/SLC4A7/CDON/PSEN1/ACHE/RPGRIP1/VSX1/CRYAB/GNAT1/FOXP2/SERPINF1/EPHB2/STRA6/SLC39A5/BBS4/CYP1A1/ADAMTS18/CNGA3/NTRK2/ZEB1/MERTK/RDH13/IFT122/SALL2/BDNF/TH/MAB21L2/RXRA/SLC4A5	31
BP	GO:0071478	cellular response to radiation	16/1045	146/16266	0.0253712	0.375588	GUCA1A/DNM2/CRYAB/MAPK14/GNAT1/CDKN1A/FIGNL1/RHBDD1/TLK2/RAD9B/PTPRK/CALM2/CALM3/DDIAS/CNGA1/CRIP1	16
BP	GO:0050953	sensory perception of light stimulus	21/1045	207/16266	0.025491	0.375588	PAX6/SLC4A7/SPATA7/GUCA1A/MYO9A/RIMS1/RPGRIP1/ABLIM1/VSX1/POU6F2/CDH23/UNC119/GRK7/GNAT1/BBS4/CNGA3/ADGRV1/TH/EYS/CNGA1/OPA1	21
BP	GO:0010765	positive regulation of sodium ion transport	6/1045	36/16266	0.0257563	0.375588	DNM2/ANK3/WNK2/SCN5A/DMD/FXYD1	6
BP	GO:0019933	cAMP-mediated signaling	8/1045	56/16266	0.0258043	0.375588	GAL/GNAS/PDE4D/UBE2B/ADCY7/EPHA5/RIMS2/PDE2A	8
BP	GO:0042246	tissue regeneration	8/1045	56/16266	0.0258043	0.375588	IFRD1/IGF1/ENO3/MAPK14/MYOG/IGFBP1/WNT10B/EYS	8
BP	GO:0050805	negative regulation of synaptic transmission	8/1045	56/16266	0.0258043	0.375588	ACHE/GNAI1/STXBP1/GRIA1/SLC6A1/DGKI/SHANK2/BDNF	8
BP	GO:0032102	negative regulation of response to external stimulus	24/1045	245/16266	0.0259739	0.375588	PGLYRP1/CALCRL/PDGFB/ACP5/CD276/CACTIN/C1QBP/MVK/SEMA5A/HRG/EPHA4/PADI2/SERPINF1/TARBP2/BBS4/ADAMTS18/CASK/ABR/NLRP3/LEP/PROS1/ROBO2/SIGIRR/PCBP2	24
BP	GO:0021537	telencephalon development	22/1045	220/16266	0.0261359	0.375588	PAX6/CDON/PSEN1/NUMBL/LHX6/SLC1A2/FOXP2/EPHB2/DAB2IP/BBS4/EPHA5/EGFR/NTRK2/EOMES/C16orf45/COL3A1/TH/GRIN2A/SCN5A/ROBO2/ADGRG1/PLXNA4	22
BP	GO:0009166	nucleotide catabolic process	12/1045	100/16266	0.0264496	0.375588	MLXIPL/IGF1/HDAC4/PDE4C/PRKAG2/PPARGC1A/PDE4D/GDA/MYOG/CBFA2T3/PDE2A/ASPDH	12
BP	GO:0034764	positive regulation of transmembrane transport	12/1045	100/16266	0.0264496	0.375588	GAL/DNM2/PDGFB/CASK/ANK3/CALM2/CALM3/WNK2/PLCG2/NOS1AP/DMD/FXYD1	12
BP	GO:0050808	synapse organization	21/1045	208/16266	0.026706	0.375588	NRXN3/CAMK2B/ACHE/NRCAM/SRPX2/UNC13A/EPHB2/DAB2IP/CHRNA1/NTRK2/ANK3/NRG1/SHANK2/GDNF/PTK2/BDNF/ROBO2/SLITRK2/MYO6/SLC9A6/ETV5	21
BP	GO:0005980	glycogen catabolic process	5/1045	27/16266	0.0268237	0.375588	CPS1/CALM2/CALM3/PPP1CA/PPP1R3E	5
BP	GO:0010543	regulation of platelet activation	5/1045	27/16266	0.0268237	0.375588	PDGFB/HRG/ADAMTS18/DMTN/SELP	5
BP	GO:0032892	positive regulation of organic acid transport	5/1045	27/16266	0.0268237	0.375588	AVP/TMEM27/SLC6A1/CYP4F2/FXYD1	5
BP	GO:0036296	response to increased oxygen levels	5/1045	27/16266	0.0268237	0.375588	POLB/CDKN1A/CYP1A1/SFTPC/BDNF	5
BP	GO:0046685	response to arsenic-containing substance	5/1045	27/16266	0.0268237	0.375588	RNF4/CDKN1A/SERPINF1/CYP1A1/HMBS	5
BP	GO:0055093	response to hyperoxia	5/1045	27/16266	0.0268237	0.375588	POLB/CDKN1A/CYP1A1/SFTPC/BDNF	5
BP	GO:2000516	positive regulation of CD4-positive, alpha-beta T cell activation	5/1045	27/16266	0.0268237	0.375588	IFNG/CD80/XCL1/NLRP3/CD55	5
BP	GO:0035264	multicellular organism growth	16/1045	147/16266	0.0268395	0.375588	IGF1/GNAS/SLC1A2/PDE4D/TARBP2/BBS4/KDM6A/SP2/ANKRD11/CTC1/CSF1/PTCH1/DIO3/GIGYF2/MBD5/ATXN2	16
BP	GO:0071219	cellular response to molecule of bacterial origin	16/1045	147/16266	0.0268395	0.375588	TNIP3/TREM2/CACTIN/IFNG/MAPK14/PDE4D/CD80/ASS1/CMPK2/CD36/DAB2IP/NLRP3/IL24/B2M/SIGIRR/CD55	16
BP	GO:0007585	respiratory gaseous exchange	9/1045	67/16266	0.0268832	0.375588	ELN/NDST1/CSF2RB/KDM6A/HNMT/TMPRSS11D/SFTPC/JAG2/ADH5	9
BP	GO:2000146	negative regulation of cell motility	20/1045	196/16266	0.0272224	0.375588	CTNNA1/PFN2/NDRG4/HAS1/KANK1/PPARGC1A/HRG/PADI2/SERPINF1/DAB2IP/SULF1/PTPRK/ABR/CYGB/IL24/C16orf45/COL3A1/LDLRAD4/GCSAM/ADGRG1	20
BP	GO:0009123	nucleoside monophosphate metabolic process	25/1045	259/16266	0.0274399	0.375588	NADK/MLXIPL/IGF1/NDUFS1/HDAC4/ENO1/COQ9/ATP6V0A4/PRKAG2/ENO3/MPP2/PPARGC1A/MYOG/CBFA2T3/MPP1/COX4I1/FIGNL1/CASK/ALDOA/HK1/NDUFV1/BDNF/MYH6/CARD11/PRPS1L1	25
BP	GO:0044282	small molecule catabolic process	31/1045	337/16266	0.0280503	0.375588	ALDH3B1/CYP46A1/ENO1/MCCC1/LIPE/PRODH/DHDH/PON3/ENO3/CPT1A/ACADL/SCP2/ACADM/IVD/APOC1/SMPD4/CSAD/ETFA/CYP1A1/GCSH/ALDOA/ACOXL/HK1/BDH1/LEP/GLDC/CYP4F2/CYP4F3/ADH5/ADH4/CPT1B	31
BP	GO:0097305	response to alcohol	30/1045	324/16266	0.0280845	0.375588	CPS1/GRN/CTNNA1/POLB/PDGFB/AVP/AREG/CRYAB/PRDM2/PTK2B/ADCY7/MYOG/CDKN1A/ASS1/SERPINF1/NASP/EGFR/EPS8/PTH/SLC6A1/CALM2/CALM3/CTSB/KAT5/TH/GRIN2A/SMYD3/PTCH1/RXRA/HMBS	30
BP	GO:0046434	organophosphate catabolic process	17/1045	160/16266	0.02827	0.375588	MLXIPL/IGF1/HDAC4/LIPG/PDE4C/PRKAG2/PPARGC1A/PDE4D/GDA/MYOG/CBFA2T3/APOC1/SMPD4/ENTPD1/PDE2A/PLCG2/ASPDH	17
BP	GO:0002066	columnar/cuboidal epithelial cell development	8/1045	57/16266	0.0283888	0.375588	PAX6/SLC4A7/RFX3/C1GALT1/CDKN1A/SHROOM3/TMC1/YIPF6	8
BP	GO:0009416	response to light stimulus	31/1045	338/16266	0.0290597	0.375588	GUCA1A/DNM2/NDRG4/UNC119/MAPK10/APOC3/SLC1A2/PITPNM1/GNAT1/UBE2B/CDKN1A/MEN1/STRA6/RHBDD1/EGFR/ITGB1/PTPRK/GNAQ/CALM2/CALM3/RDH13/IVL/DDIAS/PPP1CA/BDNF/TH/GRIN2A/EYS/BCO2/CNGA1/CRIP1	31
BP	GO:0014910	regulation of smooth muscle cell migration	6/1045	37/16266	0.0291265	0.375588	IGF1/HDAC4/PDGFB/NDRG4/PPARGC1A/PDE4D	6
BP	GO:0048857	neural nucleus development	9/1045	68/16266	0.029285	0.375588	SLC4A7/PADI2/HOXB1/PLP1/FOXP2/TTBK1/CALM2/CALM3/BASP1	9
BP	GO:0009118	regulation of nucleoside metabolic process	7/1045	47/16266	0.0293171	0.375588	MLXIPL/IGF1/HDAC4/PRKAG2/PPARGC1A/MYOG/CBFA2T3	7
BP	GO:1903578	regulation of ATP metabolic process	7/1045	47/16266	0.0293171	0.375588	MLXIPL/IGF1/HDAC4/PRKAG2/PPARGC1A/MYOG/CBFA2T3	7
BP	GO:0006112	energy reserve metabolic process	18/1045	173/16266	0.0294791	0.375588	MLXIPL/IGF1/CPS1/GNAS/PRKAG2/GNB3/LEPR/ADCY7/SYT5/STXBP1/UBC/PTH/CALM2/CALM3/GNG3/PPP1CA/LEP/PPP1R3E	18
BP	GO:0006768	biotin metabolic process	3/1045	11/16266	0.0295667	0.375588	MCCC1/SLC5A6/BTD	3
BP	GO:0007016	cytoskeletal anchoring at plasma membrane	3/1045	11/16266	0.0295667	0.375588	EPB41L3/ANK3/TLN2	3
BP	GO:0009642	response to light intensity	3/1045	11/16266	0.0295667	0.375588	GNAT1/RDH13/BDNF	3
BP	GO:0017014	protein nitrosylation	3/1045	11/16266	0.0295667	0.375588	ADH5/NOS1AP/DMD	3
BP	GO:0018119	peptidyl-cysteine S-nitrosylation	3/1045	11/16266	0.0295667	0.375588	ADH5/NOS1AP/DMD	3
BP	GO:0032025	response to cobalt ion	3/1045	11/16266	0.0295667	0.375588	SERPINF1/D2HGDH/HMBS	3
BP	GO:0032222	regulation of synaptic transmission, cholinergic	3/1045	11/16266	0.0295667	0.375588	CAMK2B/ACHE/IFNG	3
BP	GO:0042953	lipoprotein transport	3/1045	11/16266	0.0295667	0.375588	MSR1/UNC119/CD36	3
BP	GO:0044872	lipoprotein localization	3/1045	11/16266	0.0295667	0.375588	MSR1/UNC119/CD36	3
BP	GO:0045760	positive regulation of action potential	3/1045	11/16266	0.0295667	0.375588	ANK3/SCN5A/NOS1AP	3
BP	GO:0051957	positive regulation of amino acid transport	3/1045	11/16266	0.0295667	0.375588	AVP/TMEM27/SLC6A1	3
BP	GO:0060379	cardiac muscle cell myoblast differentiation	3/1045	11/16266	0.0295667	0.375588	REST/PRICKLE1/NRG1	3
BP	GO:0071257	cellular response to electrical stimulus	3/1045	11/16266	0.0295667	0.375588	REST/GNAT1/MYO6	3
BP	GO:0097286	iron ion import	3/1045	11/16266	0.0295667	0.375588	PICALM/SLC11A2/B2M	3
BP	GO:1902547	regulation of cellular response to vascular endothelial growth factor stimulus	3/1045	11/16266	0.0295667	0.375588	HRG/DAB2IP/MYO1C	3
BP	GO:0043623	cellular protein complex assembly	40/1045	458/16266	0.0297337	0.375588	ZMYND10/GAS7/RNF4/PFN2/PICALM/BCS1L/NAPA/ATP6V0A4/KANK1/TUBD1/CRYAB/PDE4D/PRLR/PTK2B/TRIM6/PILRB/CCT6B/ACTR3B/SPIRE1/TESPA1/STXBP1/BBS4/TBCD/SMAD4/HAX1/CAND2/TMEM27/FER/EPS8/NRG1/DMTN/NLRP3/RIC3/LDLRAD4/PTK2/DNAI2/FES/CAPZA2/DMD/HLA-DRA	40
BP	GO:0022407	regulation of cell-cell adhesion	33/1045	365/16266	0.0298182	0.375588	CD4/IGF1/CD44/AP3D1/FSTL3/DHPS/SOS2/CD276/IFNG/CD80/ASS1/AP3B1/SPINK5/TESPA1/FLOT1/ADAMTS18/XCL1/MYO10/ZEB1/SCGB1A1/TNFRSF14/DMTN/NLRP3/TMIGD2/PTK2/YES1/HLA-DQB1/LCK/CD55/IFNL3/CARD11/L1CAM/HLA-DRA	33
BP	GO:0030802	regulation of cyclic nucleotide biosynthetic process	15/1045	137/16266	0.0299582	0.375588	GUCA1A/CALCRL/GNAS/PTHLH/AVP/PTK2B/ADCY7/VIP/NTRK2/PTH/CALM2/CALM3/OXER1/PDE2A/GRM7	15
BP	GO:0033002	muscle cell proliferation	15/1045	137/16266	0.0299582	0.375588	IGF1/CALCRL/HDAC4/PDGFB/NDRG4/PPARGC1A/IFNG/MAPK14/PDE4D/FOXP1/MYOG/VIP/TCF7L2/NRG1/PAXBP1	15
BP	GO:0021543	pallium development	16/1045	149/16266	0.029965	0.375588	PAX6/CDON/PSEN1/LHX6/FOXP2/DAB2IP/BBS4/EPHA5/EGFR/NTRK2/EOMES/C16orf45/COL3A1/TH/GRIN2A/ADGRG1	16
BP	GO:0030308	negative regulation of cell growth	16/1045	149/16266	0.029965	0.375588	IFRD1/GAL/ENO1/SMARCA2/CRYAB/SEMA5A/HRG/BCL11A/CDKN1A/CGREF1/SMAD4/EI24/DRAXIN/PI16/GAS2L1/DCC	16
BP	GO:0050867	positive regulation of cell activation	26/1045	274/16266	0.0299752	0.375588	CD4/IGF1/AP3D1/DHPS/CD276/IFNG/RPS6KA1/CD80/CDKN1A/AP3B1/TESPA1/XCL1/TNFRSF14/DMTN/TNFSF13/NLRP3/AP1G1/TMIGD2/SELP/LEP/YES1/HLA-DQB1/LCK/CD55/CARD11/HLA-DRA	26
BP	GO:0016042	lipid catabolic process	27/1045	287/16266	0.030117	0.375588	CPS1/CYP46A1/MGLL/LIPE/LIPG/CPT1A/APOC3/PLCH1/ACADL/SCP2/ACADM/IVD/APOC1/SMPD4/ETFA/ACOXL/PLA2G2F/ASPG/PPP1CA/LEP/PLA2G6/CYP4F2/CYP4F3/BCO2/PLCG2/NEU4/CPT1B	27
BP	GO:0060562	epithelial tube morphogenesis	30/1045	326/16266	0.0301772	0.375588	IGF1/CD44/PSEN1/PTHLH/NDRG4/CTSH/EYA1/AREG/FOLR1/SEMA5A/FOXP1/EPHA4/LIAS/MICAL2/MYCN/SHROOM3/PRICKLE1/BBS4/SMAD4/KDM6A/DVL3/IFT122/GDNF/SOSTDC1/PPP1CA/CSF1/PTCH1/OPA1/DDR1/ETV5	30
BP	GO:0007413	axonal fasciculation	4/1045	19/16266	0.0302428	0.375588	NRCAM/SEMA5A/EPHA4/EPHB2	4
BP	GO:0007597	blood coagulation, intrinsic pathway	4/1045	19/16266	0.0302428	0.375588	C1QBP/F10/PRCP/GP1BB	4
BP	GO:0010002	cardioblast differentiation	4/1045	19/16266	0.0302428	0.375588	REST/PRICKLE1/NRG1/EOMES	4
BP	GO:0019373	epoxygenase P450 pathway	4/1045	19/16266	0.0302428	0.375588	CYP1A1/CYP2S1/CYP4F2/CYP2B6	4
BP	GO:0033189	response to vitamin A	4/1045	19/16266	0.0302428	0.375588	CYP1A1/SFTPC/BDNF/RXRA	4
BP	GO:0045076	regulation of interleukin-2 biosynthetic process	4/1045	19/16266	0.0302428	0.375588	CD4/CD276/CD80/CARD11	4
BP	GO:0046037	GMP metabolic process	4/1045	19/16266	0.0302428	0.375588	MPP2/MPP1/CASK/CARD11	4
BP	GO:0050901	leukocyte tethering or rolling	4/1045	19/16266	0.0302428	0.375588	ITGB7/ITGB1/SELP/LEP	4
BP	GO:0030336	negative regulation of cell migration	19/1045	186/16266	0.0304911	0.375796	PFN2/NDRG4/HAS1/KANK1/PPARGC1A/HRG/PADI2/SERPINF1/DAB2IP/SULF1/PTPRK/ABR/CYGB/IL24/C16orf45/COL3A1/LDLRAD4/GCSAM/ADGRG1	19
BP	GO:0002832	negative regulation of response to biotic stimulus	5/1045	28/16266	0.0309819	0.375796	CACTIN/C1QBP/TARBP2/SIGIRR/PCBP2	5
BP	GO:0009251	glucan catabolic process	5/1045	28/16266	0.0309819	0.375796	CPS1/CALM2/CALM3/PPP1CA/PPP1R3E	5
BP	GO:0032350	regulation of hormone metabolic process	5/1045	28/16266	0.0309819	0.375796	GAL/REST/HPN/TCF7L2/KCNMA1	5
BP	GO:0048791	calcium ion-dependent exocytosis of neurotransmitter	5/1045	28/16266	0.0309819	0.375796	RIMS1/SYT5/SYT8/RIMS2/DOC2B	5
BP	GO:0050704	regulation of interleukin-1 secretion	5/1045	28/16266	0.0309819	0.375796	IFNG/FOXP1/CASP1/IFNAR1/NLRP3	5
BP	GO:0070528	protein kinase C signaling	5/1045	28/16266	0.0309819	0.375796	PRKCH/PDGFB/AVP/FLOT1/ADGRG1	5
BP	GO:0071548	response to dexamethasone	5/1045	28/16266	0.0309819	0.375796	CPS1/ASS1/SERPINF1/SMYD3/HMBS	5
BP	GO:0072595	maintenance of protein localization in organelle	5/1045	28/16266	0.0309819	0.375796	SYNE1/BBS4/HK1/SUN1/PDIA2	5
BP	GO:0019886	antigen processing and presentation of exogenous peptide antigen via MHC class II	11/1045	91/16266	0.0311971	0.376099	DNM2/AP1B1/KLC1/DCTN4/OSBPL1A/SAR1B/AP1G1/HLA-DQB1/AP1S2/HLA-DRA/DCTN1	11
BP	GO:0033500	carbohydrate homeostasis	20/1045	199/16266	0.0313282	0.376099	PAX6/MLXIPL/DHPS/PPARGC1A/IL1R1/SPOP/FFAR2/SERPINF1/MEN1/PRCP/STXBP5L/EPHA5/TMEM27/TCF7L2/HK1/BRSK2/LEP/TH/PTCH1/MBD5	20
BP	GO:0042593	glucose homeostasis	20/1045	199/16266	0.0313282	0.376099	PAX6/MLXIPL/DHPS/PPARGC1A/IL1R1/SPOP/FFAR2/SERPINF1/MEN1/PRCP/STXBP5L/EPHA5/TMEM27/TCF7L2/HK1/BRSK2/LEP/TH/PTCH1/MBD5	20
BP	GO:0090257	regulation of muscle system process	20/1045	199/16266	0.0313282	0.376099	GTF2IRD1/IGF1/CAMK2B/CALCRL/HDAC4/TNNT1/PDE4D/AKAP1/MYOG/KCNMA1/TNNI1/CALM2/CALM3/PI16/KCNB2/LCK/SCN5A/NOS1AP/DMD/FXYD1	20
BP	GO:0097479	synaptic vesicle localization	14/1045	126/16266	0.0315448	0.376367	GRN/AP3D1/RAB27A/PFN2/DNM2/RIMS1/PSEN1/NAPA/SYT5/UNC13A/AP3B1/STXBP1/SYT8/TH	14
BP	GO:0002285	lymphocyte activation involved in immune response	15/1045	138/16266	0.0316974	0.376367	PGLYRP1/RAB27A/PSEN1/IFNG/FOXP1/PTK2B/CD80/TNFSF13/NLRP3/EOMES/AP1G1/IFNA10/SEMA4A/PLCG2/IFNA4	15
BP	GO:0060041	retina development in camera-type eye	15/1045	138/16266	0.0316974	0.376367	PROM1/PAX6/SLC4A7/CDON/PSEN1/ACHE/RPGRIP1/VSX1/GNAT1/SERPINF1/CNGA3/NTRK2/MERTK/RDH13/SLC4A5	15
BP	GO:0030048	actin filament-based movement	10/1045	80/16266	0.0317639	0.376367	TNNT1/PDE4D/MYO1B/TNNI1/TPM4/SCN5A/MYO6/MYH6/DMD/FXYD1	10
BP	GO:0032411	positive regulation of transporter activity	9/1045	69/16266	0.0318329	0.376367	GAL/DNM2/ANK3/CALM2/CALM3/WNK2/PLCG2/NOS1AP/DMD	9
BP	GO:0061180	mammary gland epithelium development	9/1045	69/16266	0.0318329	0.376367	PTHLH/AREG/PRLR/RREB1/SOSTDC1/CSF1/PTCH1/DDR1/ETV5	9
BP	GO:0006898	receptor-mediated endocytosis	24/1045	250/16266	0.0319774	0.377124	MSR1/CALCRL/SLC9A3/PICALM/DNM2/ACHE/PACSIN2/DNM1/UNC119/FOLR1/APOC3/APOC1/CD36/FLOT1/ARRB2/ASGR1/HYOU1/GRIA1/B2M/COL3A1/CD163/PLCG2/ATXN2/CFI	24
BP	GO:0002697	regulation of immune effector process	36/1045	407/16266	0.0320774	0.377353	PGLYRP1/CD4/ATG5/AP1B1/PNPO/C1QBP/IFNG/FANCL/TRIM6/CD80/FFAR2/CFP/CD36/TARBP2/ARRB2/XCL1/SNTG1/FER/ELMO1/TNFRSF14/ABR/TNFSF13/NLRP3/TLR3/B2M/AP1G1/PHYHIP/AP1S2/FES/LCK/PROS1/CD55/PCBP2/SMURF1/MBD5/CFI	36
BP	GO:0048168	regulation of neuronal synaptic plasticity	7/1045	48/16266	0.0324895	0.381005	CAMK2B/CAMK2A/RIMS1/UNC13A/EPHB2/BDNF/GRIN2A	7
BP	GO:0032371	regulation of sterol transport	6/1045	38/16266	0.0327738	0.381005	LIPG/APOC3/SCP2/APOC1/LEP/PTCH1	6
BP	GO:0032374	regulation of cholesterol transport	6/1045	38/16266	0.0327738	0.381005	LIPG/APOC3/SCP2/APOC1/LEP/PTCH1	6
BP	GO:0071377	cellular response to glucagon stimulus	6/1045	38/16266	0.0327738	0.381005	CPS1/GNAS/GNB3/ADCY7/ASS1/GNG3	6
BP	GO:0046034	ATP metabolic process	20/1045	200/16266	0.0327947	0.381005	NADK/MLXIPL/IGF1/NDUFS1/HDAC4/ENO1/COQ9/ATP6V0A4/PRKAG2/ENO3/PPARGC1A/MYOG/CBFA2T3/COX4I1/FIGNL1/ALDOA/HK1/NDUFV1/BDNF/MYH6	20
BP	GO:0010977	negative regulation of neuron projection development	11/1045	92/16266	0.0334606	0.386821	IFRD1/CBFA2T2/PSEN1/KANK1/SEMA5A/EPHA4/BCL11A/EPHB2/DRAXIN/PTK2/DCC	11
BP	GO:0032507	maintenance of protein location in cell	11/1045	92/16266	0.0334606	0.386821	CD4/EPB41L3/ZNF268/MDFI/SYNE1/BBS4/ANK3/HK1/SUN1/TLN2/PDIA2	11
BP	GO:0031295	T cell costimulation	9/1045	70/16266	0.0345306	0.389786	CD4/CD80/TNFRSF14/TMIGD2/YES1/HLA-DQB1/LCK/CARD11/HLA-DRA	9
BP	GO:0050870	positive regulation of T cell activation	19/1045	189/16266	0.03512	0.389786	CD4/IGF1/AP3D1/DHPS/CD276/IFNG/CD80/AP3B1/TESPA1/XCL1/TNFRSF14/NLRP3/TMIGD2/YES1/HLA-DQB1/LCK/CD55/CARD11/HLA-DRA	19
BP	GO:0071222	cellular response to lipopolysaccharide	15/1045	140/16266	0.0353956	0.389786	TNIP3/CACTIN/IFNG/MAPK14/PDE4D/CD80/ASS1/CMPK2/CD36/DAB2IP/NLRP3/IL24/B2M/SIGIRR/CD55	15
BP	GO:0002831	regulation of response to biotic stimulus	22/1045	227/16266	0.0354298	0.389786	CD4/AP1B1/CACTIN/PNPO/C1QBP/HRG/FOXP1/FANCL/TRIM6/TARBP2/SNTG1/ELMO1/B2M/AP1G1/PHYHIP/AP1S2/LCK/SIGIRR/CD55/PCBP2/SMURF1/MBD5	22
BP	GO:0007274	neuromuscular synaptic transmission	5/1045	29/16266	0.0355224	0.389786	DTNA/STXBP1/CHRNA1/STAC3/ETV5	5
BP	GO:0030449	regulation of complement activation	5/1045	29/16266	0.0355224	0.389786	C1QBP/CFP/PROS1/CD55/CFI	5
BP	GO:0044247	cellular polysaccharide catabolic process	5/1045	29/16266	0.0355224	0.389786	CPS1/CALM2/CALM3/PPP1CA/PPP1R3E	5
BP	GO:0050702	interleukin-1 beta secretion	5/1045	29/16266	0.0355224	0.389786	IFNG/FOXP1/CASP1/IFNAR1/NLRP3	5
BP	GO:0060612	adipose tissue development	5/1045	29/16266	0.0355224	0.389786	PPARGC1A/BBS4/LEP/CSF1/EBF2	5
BP	GO:0050768	negative regulation of neurogenesis	20/1045	202/16266	0.0358805	0.389786	IFRD1/PAX6/CTNNA1/CBFA2T2/PSEN1/REST/KANK1/PRPF19/SEMA5A/EPHA4/BCL11A/EPHB2/MYCN/DRAXIN/C16orf45/COL3A1/PTK2/BDNF/DCC/ADGRG1	20
BP	GO:0007566	embryo implantation	7/1045	49/16266	0.0358832	0.389786	GRN/MMP2/C1QBP/PRLR/SCGB1A1/RXRA/DDR1	7
BP	GO:0030850	prostate gland development	7/1045	49/16266	0.0358832	0.389786	IGF1/CD44/PRLR/SERPINF1/SULF1/RXRA/CRIP1	7
BP	GO:0045428	regulation of nitric oxide biosynthetic process	7/1045	49/16266	0.0358832	0.389786	DNM2/ACP5/IFNG/PTK2B/ASS1/EGFR/NOS1AP	7
BP	GO:0050848	regulation of calcium-mediated signaling	7/1045	49/16266	0.0358832	0.389786	CD4/IGF1/TREM2/RCAN3/PTK2B/NRG1/L1CAM	7
BP	GO:0033233	regulation of protein sumoylation	4/1045	20/16266	0.0359368	0.389786	RNF4/HDAC4/MAGEA2/MAGEA2B	4
BP	GO:0050718	positive regulation of interleukin-1 beta secretion	4/1045	20/16266	0.0359368	0.389786	IFNG/CASP1/IFNAR1/NLRP3	4
BP	GO:0006606	protein import into nucleus	24/1045	253/16266	0.0360509	0.389786	IGF1/FBXW11/FYB/GCKR/ZNF268/KANK1/IFNG/MAPK14/MDFI/SEMA5A/AKAP1/CDKN1A/CD36/DAB2IP/PRICKLE1/SMAD4/EGFR/GNAQ/NLRP3/TLR3/LEP/PARP10/PDE2A/POU5F1	24
BP	GO:0044744	protein targeting to nucleus	24/1045	253/16266	0.0360509	0.389786	IGF1/FBXW11/FYB/GCKR/ZNF268/KANK1/IFNG/MAPK14/MDFI/SEMA5A/AKAP1/CDKN1A/CD36/DAB2IP/PRICKLE1/SMAD4/EGFR/GNAQ/NLRP3/TLR3/LEP/PARP10/PDE2A/POU5F1	24
BP	GO:1902593	single-organism nuclear import	24/1045	253/16266	0.0360509	0.389786	IGF1/FBXW11/FYB/GCKR/ZNF268/KANK1/IFNG/MAPK14/MDFI/SEMA5A/AKAP1/CDKN1A/CD36/DAB2IP/PRICKLE1/SMAD4/EGFR/GNAQ/NLRP3/TLR3/LEP/PARP10/PDE2A/POU5F1	24
BP	GO:0045494	photoreceptor cell maintenance	6/1045	39/16266	0.0367048	0.389786	PROM1/SPATA7/CDH23/BBS4/ADGRV1/NXNL1	6
BP	GO:0030810	positive regulation of nucleotide biosynthetic process	12/1045	105/16266	0.0368245	0.389786	GUCA1A/CALCRL/GNAS/PTHLH/AVP/PPARGC1A/ADCY7/VIP/NTRK2/PTH/CALM2/CALM3	12
BP	GO:1900373	positive regulation of purine nucleotide biosynthetic process	12/1045	105/16266	0.0368245	0.389786	GUCA1A/CALCRL/GNAS/PTHLH/AVP/PPARGC1A/ADCY7/VIP/NTRK2/PTH/CALM2/CALM3	12
BP	GO:0030819	positive regulation of cAMP biosynthetic process	10/1045	82/16266	0.0368392	0.389786	CALCRL/GNAS/PTHLH/AVP/ADCY7/VIP/NTRK2/PTH/CALM2/CALM3	10
BP	GO:0010632	regulation of epithelial cell migration	16/1045	153/16266	0.0370104	0.389786	PFN2/PDGFB/SRPX2/CTSH/IFNG/SEMA5A/HRG/FOXP1/PTK2B/GLIPR2/RREB1/SERPINF1/DAB2IP/BMPER/PTK2/SEMA4A	16
BP	GO:0030817	regulation of cAMP biosynthetic process	13/1045	117/16266	0.0373384	0.389786	CALCRL/GNAS/PTHLH/AVP/ADCY7/VIP/NTRK2/PTH/CALM2/CALM3/OXER1/PDE2A/GRM7	13
BP	GO:0001824	blastocyst development	9/1045	71/16266	0.0373815	0.389786	IGF1/GRN/PRPF19/CNOT2/ESRRB/NASP/WDR74/EOMES/POU5F1	9
BP	GO:0031294	lymphocyte costimulation	9/1045	71/16266	0.0373815	0.389786	CD4/CD80/TNFRSF14/TMIGD2/YES1/HLA-DQB1/LCK/CARD11/HLA-DRA	9
BP	GO:0048259	regulation of receptor-mediated endocytosis	9/1045	71/16266	0.0373815	0.389786	PICALM/UNC119/APOC3/APOC1/FLOT1/ARRB2/B2M/PLCG2/ATXN2	9
BP	GO:0072376	protein activation cascade	9/1045	71/16266	0.0373815	0.389786	C1QBP/F10/CFP/PRCP/C1S/PROS1/CD55/GP1BB/CFI	9
BP	GO:1901616	organic hydroxy compound catabolic process	9/1045	71/16266	0.0373815	0.389786	ALDH3B1/CYP46A1/ACADL/APOC1/SMPD4/CYP4F2/CYP4F3/DIO3/ADH4	9
BP	GO:0002739	regulation of cytokine secretion involved in immune response	3/1045	12/16266	0.0375801	0.389786	ATG5/TRIM6/TNFRSF14	3
BP	GO:0006012	galactose metabolic process	3/1045	12/16266	0.0375801	0.389786	SLC35A2/PPARGC1A/GALM	3
BP	GO:0007171	activation of transmembrane receptor protein tyrosine kinase activity	3/1045	12/16266	0.0375801	0.389786	PRLR/PILRB/NRG1	3
BP	GO:0014854	response to inactivity	3/1045	12/16266	0.0375801	0.389786	HDAC4/MYOG/SCN5A	3
BP	GO:0014874	response to stimulus involved in regulation of muscle adaptation	3/1045	12/16266	0.0375801	0.389786	HDAC4/MYOG/SCN5A	3
BP	GO:0015802	basic amino acid transport	3/1045	12/16266	0.0375801	0.389786	SLC7A2/SLC3A1/SLC7A7	3
BP	GO:0019934	cGMP-mediated signaling	3/1045	12/16266	0.0375801	0.389786	PTK2B/CD36/PDE2A	3
BP	GO:0036066	protein O-linked fucosylation	3/1045	12/16266	0.0375801	0.389786	SLC35C2/CFP/ADAMTS13	3
BP	GO:0040015	negative regulation of multicellular organism growth	3/1045	12/16266	0.0375801	0.389786	GNAS/PTCH1/ATXN2	3
BP	GO:0043217	myelin maintenance	3/1045	12/16266	0.0375801	0.389786	EPB41L3/MYRF/SH3TC2	3
BP	GO:0043476	pigment accumulation	3/1045	12/16266	0.0375801	0.389786	AP3D1/SHROOM3/AP1G1	3
BP	GO:0043482	cellular pigment accumulation	3/1045	12/16266	0.0375801	0.389786	AP3D1/SHROOM3/AP1G1	3
BP	GO:0045073	regulation of chemokine biosynthetic process	3/1045	12/16266	0.0375801	0.389786	IFNG/TLR3/SIGIRR	3
BP	GO:0060576	intestinal epithelial cell development	3/1045	12/16266	0.0375801	0.389786	C1GALT1/CDKN1A/YIPF6	3
BP	GO:1902603	carnitine transmembrane transport	3/1045	12/16266	0.0375801	0.389786	PRKAG2/CPT1A/CPT1B	3
BP	GO:0016358	dendrite development	18/1045	178/16266	0.037598	0.389786	GRN/CAMK2B/PICALM/PSEN1/PQBP1/SLC11A2/EPHA4/BCL11A/EPHB2/DAB2IP/BBS4/ITGB1/BDNF/DCC/MYO6/SLC9A6/OPA1/LST1	18
BP	GO:0034110	regulation of homotypic cell-cell adhesion	27/1045	293/16266	0.0376299	0.389786	CD4/IGF1/CD44/AP3D1/DHPS/SOS2/CD276/IFNG/CD80/AP3B1/SPINK5/TESPA1/ADAMTS18/XCL1/ZEB1/SCGB1A1/TNFRSF14/DMTN/NLRP3/TMIGD2/YES1/HLA-DQB1/LCK/CD55/IFNL3/CARD11/HLA-DRA	27
BP	GO:2000241	regulation of reproductive process	11/1045	94/16266	0.038331	0.396172	IGF1/PTGDS/C1QBP/SERPINF1/DMRT1/SULF1/VIP/NUPR1/RXRA/WEE2/NOX5	11
BP	GO:0009150	purine ribonucleotide metabolic process	41/1045	481/16266	0.0390923	0.40315	NADK/MLXIPL/IGF1/NDUFS1/GUCA1A/CALCRL/HDAC4/ENO1/GNAS/PTHLH/COQ9/AVP/PDE4C/ATP6V0A4/PRKAG2/ENO3/MPP2/PPARGC1A/PDE4D/PTK2B/ADCY7/MYOG/CBFA2T3/MPP1/COX4I1/FIGNL1/VIP/CASK/NTRK2/ALDOA/PTH/HK1/CALM2/CALM3/OXER1/NDUFV1/BDNF/PDE2A/GRM7/MYH6/CARD11	41
BP	GO:0048593	camera-type eye morphogenesis	12/1045	106/16266	0.0392021	0.403394	PROM1/PAX6/SLC4A7/CDON/VSX1/EPHB2/STRA6/CNGA3/ZEB1/RDH13/IFT122/TH	12
BP	GO:0032663	regulation of interleukin-2 production	7/1045	50/16266	0.0395028	0.403697	CD4/CD276/PDE4D/CD80/XCL1/KAT5/CARD11	7
BP	GO:0046503	glycerolipid catabolic process	7/1045	50/16266	0.0395028	0.403697	CPS1/MGLL/LIPE/APOC3/APOC1/SMPD4/PPP1CA	7
BP	GO:0046635	positive regulation of alpha-beta T cell activation	7/1045	50/16266	0.0395028	0.403697	AP3D1/IFNG/CD80/AP3B1/XCL1/NLRP3/CD55	7
BP	GO:0002286	T cell activation involved in immune response	10/1045	83/16266	0.0395764	0.403697	RAB27A/PSEN1/IFNG/FOXP1/CD80/NLRP3/EOMES/IFNA10/SEMA4A/IFNA4	10
BP	GO:0040013	negative regulation of locomotion	22/1045	230/16266	0.0400903	0.404349	CTNNA1/PFN2/NDRG4/HAS1/KANK1/PPARGC1A/SEMA5A/HRG/PADI2/SERPINF1/DAB2IP/SULF1/PTPRK/ABR/CYGB/IL24/C16orf45/COL3A1/LDLRAD4/GCSAM/ROBO2/ADGRG1	22
BP	GO:1900181	negative regulation of protein localization to nucleus	9/1045	72/16266	0.040389	0.404349	FBXW11/ZNF268/MDFI/AKAP1/CD36/DAB2IP/NLRP3/PARP10/PDE2A	9
BP	GO:0002323	natural killer cell activation involved in immune response	5/1045	30/16266	0.040452	0.404349	PGLYRP1/RAB27A/AP1G1/IFNA10/IFNA4	5
BP	GO:0021955	central nervous system neuron axonogenesis	5/1045	30/16266	0.040452	0.404349	EPHA4/EPHB2/PTK2/DCC/PLXNA4	5
BP	GO:0032689	negative regulation of interferon-gamma production	5/1045	30/16266	0.040452	0.404349	PGLYRP1/CD276/C1QBP/XCL1/SCGB1A1	5
BP	GO:0045684	positive regulation of epidermis development	5/1045	30/16266	0.040452	0.404349	PRKCH/GAL/TMEM79/WNT10B/PTCH1	5
BP	GO:0050850	positive regulation of calcium-mediated signaling	5/1045	30/16266	0.040452	0.404349	CD4/IGF1/TREM2/NRG1/L1CAM	5
BP	GO:0032272	negative regulation of protein polymerization	8/1045	61/16266	0.040504	0.404349	PFN2/KANK1/BBS4/TBCD/EPS8/DMTN/FAM21C/CAPZA2	8
BP	GO:0070252	actin-mediated cell contraction	8/1045	61/16266	0.040504	0.404349	TNNT1/PDE4D/TNNI1/TPM4/SCN5A/MYH6/DMD/FXYD1	8
BP	GO:1901880	negative regulation of protein depolymerization	8/1045	61/16266	0.040504	0.404349	TRIM54/EPS8/DMTN/C16orf45/FAM21C/GAS2L1/CAPZA2/GAS2L2	8
BP	GO:0007517	muscle organ development	31/1045	348/16266	0.0407577	0.405957	IGF1/CDON/HDAC4/ACHE/CRYAB/MAPK14/PLAGL1/MYOG/SGCE/FOXP2/ASS1/FLOT1/STRA6/CHRNA1/PRICKLE1/MBNL1/NRG1/PAXBP1/TNNI1/EOMES/PI16/CTSB/COL3A1/WNT10B/NUPR1/BDNF/BASP1/STAC3/RXRA/MYH6/DMD	31
BP	GO:0018198	peptidyl-cysteine modification	6/1045	40/16266	0.0409252	0.405957	ZDHHC3/ZDHHC9/ADH5/NOS1AP/DMD/HMBS	6
BP	GO:0051602	response to electrical stimulus	6/1045	40/16266	0.0409252	0.405957	REST/GNAT1/MYOG/BDNF/TH/MYO6	6
BP	GO:0005976	polysaccharide metabolic process	12/1045	107/16266	0.0416855	0.40612	IGF1/CPS1/NDST1/PDGFB/HAS1/PRKAG2/UBC/PTH/CALM2/CALM3/PPP1CA/PPP1R3E	12
BP	GO:0046631	alpha-beta T cell activation	12/1045	107/16266	0.0416855	0.40612	AP3D1/TNFSF8/IFNG/FOXP1/CD80/AP3B1/XCL1/TNFRSF14/NLRP3/EOMES/SEMA4A/CD55	12
BP	GO:0051170	nuclear import	24/1045	257/16266	0.0420699	0.40612	IGF1/FBXW11/FYB/GCKR/ZNF268/KANK1/IFNG/MAPK14/MDFI/SEMA5A/AKAP1/CDKN1A/CD36/DAB2IP/PRICKLE1/SMAD4/EGFR/GNAQ/NLRP3/TLR3/LEP/PARP10/PDE2A/POU5F1	24
BP	GO:0006882	cellular zinc ion homeostasis	4/1045	21/16266	0.0422064	0.40612	AP3D1/SLC39A14/SLC30A3/LCK	4
BP	GO:0014911	positive regulation of smooth muscle cell migration	4/1045	21/16266	0.0422064	0.40612	IGF1/HDAC4/PDGFB/PDE4D	4
BP	GO:0019370	leukotriene biosynthetic process	4/1045	21/16266	0.0422064	0.40612	GGT1/GGTLC2/GGTLC1/GGT2	4
BP	GO:0033137	negative regulation of peptidyl-serine phosphorylation	4/1045	21/16266	0.0422064	0.40612	MLXIPL/PDE4D/DMTN/DMD	4
BP	GO:0045979	positive regulation of nucleoside metabolic process	4/1045	21/16266	0.0422064	0.40612	MLXIPL/IGF1/PPARGC1A/MYOG	4
BP	GO:0048668	collateral sprouting	4/1045	21/16266	0.0422064	0.40612	IFRD1/BCL11A/BDNF/DCC	4
BP	GO:0048745	smooth muscle tissue development	4/1045	21/16266	0.0422064	0.40612	ITGA8/FOXP2/STRA6/COL3A1	4
BP	GO:0051000	positive regulation of nitric-oxide synthase activity	4/1045	21/16266	0.0422064	0.40612	PTK2B/CALM2/CALM3/NOS1AP	4
BP	GO:1900027	regulation of ruffle assembly	4/1045	21/16266	0.0422064	0.40612	SH3YL1/PFN2/KANK1/EPS8L1	4
BP	GO:1903580	positive regulation of ATP metabolic process	4/1045	21/16266	0.0422064	0.40612	MLXIPL/IGF1/PPARGC1A/MYOG	4
BP	GO:0015850	organic hydroxy compound transport	21/1045	219/16266	0.0431355	0.40612	MSR1/GAL/PSEN1/SLC27A5/SLCO1A2/LIPG/PRKAG2/CPT1A/APOC3/SCP2/APOC1/CD36/SLCO2B1/REN/SLC5A12/GDNF/LEP/PTCH1/RXRA/CPT1B/STARD10	21
BP	GO:0030837	negative regulation of actin filament polymerization	7/1045	51/16266	0.0433527	0.40612	PFN2/KANK1/BBS4/EPS8/DMTN/FAM21C/CAPZA2	7
BP	GO:0048661	positive regulation of smooth muscle cell proliferation	7/1045	51/16266	0.0433527	0.40612	IGF1/CALCRL/HDAC4/PDGFB/PPARGC1A/PDE4D/FOXP1	7
BP	GO:0051193	regulation of cofactor metabolic process	7/1045	51/16266	0.0433527	0.40612	MLXIPL/IGF1/HDAC4/PRKAG2/PPARGC1A/MYOG/CBFA2T3	7
BP	GO:0051196	regulation of coenzyme metabolic process	7/1045	51/16266	0.0433527	0.40612	MLXIPL/IGF1/HDAC4/PRKAG2/PPARGC1A/MYOG/CBFA2T3	7
BP	GO:0060443	mammary gland morphogenesis	7/1045	51/16266	0.0433527	0.40612	PTHLH/AREG/SOSTDC1/CSF1/PTCH1/DDR1/ETV5	7
BP	GO:1903037	regulation of leukocyte cell-cell adhesion	26/1045	284/16266	0.0435479	0.40612	CD4/IGF1/CD44/AP3D1/DHPS/SOS2/CD276/IFNG/CD80/ASS1/AP3B1/SPINK5/TESPA1/XCL1/ZEB1/SCGB1A1/TNFRSF14/NLRP3/TMIGD2/YES1/HLA-DQB1/LCK/CD55/IFNL3/CARD11/HLA-DRA	26
BP	GO:0031623	receptor internalization	9/1045	73/16266	0.0435559	0.40612	CALCRL/PICALM/DNM2/ACHE/FLOT1/ARRB2/GRIA1/PLCG2/ATXN2	9
BP	GO:0009743	response to carbohydrate	19/1045	194/16266	0.0439566	0.40612	MLXIPL/CALCRL/GCKR/MAPK14/IL1R1/PTK2B/SERPINF1/MEN1/EPHA5/TMEM27/TCF7L2/SLC6A1/CTSB/SFTPC/BRSK2/LEP/TH/GRIN2A/HMBS	19
BP	GO:1901983	regulation of protein acetylation	8/1045	62/16266	0.0439972	0.40612	ATG5/PPARGC1A/WBP2/SMAD4/KAT5/MAGEA2/MAGEA2B/TADA2A	8
BP	GO:0030814	regulation of cAMP metabolic process	14/1045	132/16266	0.0441934	0.40612	CALCRL/GNAS/PTHLH/AVP/PDE4D/ADCY7/VIP/NTRK2/PTH/CALM2/CALM3/OXER1/PDE2A/GRM7	14
BP	GO:0055002	striated muscle cell development	14/1045	132/16266	0.0441934	0.40612	IGF1/ATG5/HDAC4/POPDC2/MYOG/ITGB1/OBSCN/SORBS2/PI16/WNT10B/SMYD3/STAC3/MYH6/DMD	14
BP	GO:0031333	negative regulation of protein complex assembly	12/1045	108/16266	0.0442765	0.40612	PFN2/KANK1/BCL11A/BBS4/TBCD/EPS8/DMTN/SOST/HIST3H3/LDLRAD4/FAM21C/CAPZA2	12
BP	GO:0060491	regulation of cell projection assembly	13/1045	120/16266	0.0444106	0.40612	SH3YL1/ATG5/HDAC4/PFN2/DNM2/KANK1/HRG/EPS8L1/BBS4/MYO10/FER/DMTN/ESPN	13
BP	GO:0019882	antigen processing and presentation	21/1045	220/16266	0.0449294	0.40612	ABCB5/AP3D1/RAB27A/DNM2/TREM2/AP1B1/CTSH/IFNG/KLC1/AP3B1/DCTN4/CD36/OSBPL1A/UBC/SAR1B/B2M/AP1G1/HLA-DQB1/AP1S2/HLA-DRA/DCTN1	21
BP	GO:0006732	coenzyme metabolic process	26/1045	285/16266	0.0451201	0.40612	NADK/MLXIPL/IGF1/HDAC4/ENO1/FOLH1/COQ9/PRKAG2/PNPO/ENO3/PPARGC1A/FOLR1/MVK/VNN2/LIAS/MYOG/CBFA2T3/SUCLA2/SLC5A6/ALDOA/HK1/NMNAT3/CYP4F2/TPK1/ASPDH/ACSM4	26
BP	GO:0090287	regulation of cellular response to growth factor stimulus	22/1045	233/16266	0.0451871	0.40612	FSTL3/ITGA8/DNM2/FOLR1/HRG/RUNX2/MEN1/DAB2IP/SULF1/SMAD4/CASK/ZEB1/UBC/BMPER/SOST/LDLRAD4/SOSTDC1/PPP1CA/MYO1C/SLC9A6/SMURF1/DMD	22
BP	GO:0048545	response to steroid hormone	35/1045	405/16266	0.0453502	0.40612	CPS1/GRN/CTNNA1/SLC9A3/GAL/REST/TBL1Y/PDGFB/AVP/ACSBG1/PTGDS/AREG/CRYAB/PRDM2/ESRRB/MYOG/CDKN1A/ASS1/SERPINF1/WBP2/NASP/EGFR/SCGB1A1/HNMT/SLC6A1/CALM2/CALM3/CA4/SFTPC/KAT5/TH/SMYD3/PTCH1/RXRA/HMBS	35
BP	GO:0010660	regulation of muscle cell apoptotic process	6/1045	41/16266	0.0454396	0.40612	IGF1/CAMK2A/IFNG/PTK2B/ARRB2/NRG1	6
BP	GO:0045123	cellular extravasation	6/1045	41/16266	0.0454396	0.40612	ITGB7/ITGB1/FER/ABR/SELP/LEP	6
BP	GO:0050715	positive regulation of cytokine secretion	10/1045	85/16266	0.0454629	0.40612	CD276/IFNG/MAPK14/TRIM6/FFAR2/CASP1/IFNAR1/TNFRSF14/NLRP3/SCAMP5	10
BP	GO:0060333	interferon-gamma-mediated signaling pathway	10/1045	85/16266	0.0454629	0.40612	CD44/CAMK2B/CAMK2A/IFNG/TRIM22/NCAM1/B2M/HLA-DQB1/CIITA/HLA-DRA	10
BP	GO:0000272	polysaccharide catabolic process	5/1045	31/16266	0.0457757	0.40612	CPS1/CALM2/CALM3/PPP1CA/PPP1R3E	5
BP	GO:0022400	regulation of rhodopsin mediated signaling pathway	5/1045	31/16266	0.0457757	0.40612	GUCA1A/GNAT1/CALM2/CALM3/CNGA1	5
BP	GO:0031111	negative regulation of microtubule polymerization or depolymerization	5/1045	31/16266	0.0457757	0.40612	TRIM54/TBCD/C16orf45/GAS2L1/GAS2L2	5
BP	GO:0034381	plasma lipoprotein particle clearance	5/1045	31/16266	0.0457757	0.40612	MSR1/LIPG/APOC3/APOC1/CD36	5
BP	GO:0060512	prostate gland morphogenesis	5/1045	31/16266	0.0457757	0.40612	IGF1/CD44/SULF1/RXRA/CRIP1	5
BP	GO:0071869	response to catecholamine	5/1045	31/16266	0.0457757	0.40612	DNM2/GNAS/PPARGC1A/PDE4D/BDNF	5
BP	GO:2000257	regulation of protein activation cascade	5/1045	31/16266	0.0457757	0.40612	C1QBP/CFP/PROS1/CD55/CFI	5
BP	GO:0030217	T cell differentiation	20/1045	208/16266	0.0464227	0.40612	CD4/AP3D1/SOS2/TNFSF8/IFNG/FOXP1/BCL11A/CD80/RUNX2/AP3B1/SPINK5/TESPA1/ZEB1/NLRP3/EOMES/B2M/LCK/JAG2/SEMA4A/CARD11	20
BP	GO:0000338	protein deneddylation	3/1045	13/16266	0.0465798	0.40612	FAM76B/COPS7A/COPS7B	3
BP	GO:0002726	positive regulation of T cell cytokine production	3/1045	13/16266	0.0465798	0.40612	XCL1/NLRP3/B2M	3
BP	GO:0007342	fusion of sperm to egg plasma membrane	3/1045	13/16266	0.0465798	0.40612	CD9/ROPN1B/NOX5	3
BP	GO:0007494	midgut development	3/1045	13/16266	0.0465798	0.40612	CPS1/ASS1/RXRA	3
BP	GO:0009437	carnitine metabolic process	3/1045	13/16266	0.0465798	0.40612	CPT1A/ACADL/ACADM	3
BP	GO:0010172	embryonic body morphogenesis	3/1045	13/16266	0.0465798	0.40612	CDON/IFT122/MAB21L2	3
BP	GO:0010649	regulation of cell communication by electrical coupling	3/1045	13/16266	0.0465798	0.40612	PDE4D/CALM2/CALM3	3
BP	GO:0010984	regulation of lipoprotein particle clearance	3/1045	13/16266	0.0465798	0.40612	LIPG/APOC3/APOC1	3
BP	GO:0015838	amino-acid betaine transport	3/1045	13/16266	0.0465798	0.40612	PRKAG2/CPT1A/CPT1B	3
BP	GO:0015879	carnitine transport	3/1045	13/16266	0.0465798	0.40612	PRKAG2/CPT1A/CPT1B	3
BP	GO:0032691	negative regulation of interleukin-1 beta production	3/1045	13/16266	0.0465798	0.40612	ACP5/ARRB2/NLRP3	3
BP	GO:0034390	smooth muscle cell apoptotic process	3/1045	13/16266	0.0465798	0.40612	IGF1/IFNG/ARRB2	3
BP	GO:0034391	regulation of smooth muscle cell apoptotic process	3/1045	13/16266	0.0465798	0.40612	IGF1/IFNG/ARRB2	3
BP	GO:0036119	response to platelet-derived growth factor	3/1045	13/16266	0.0465798	0.40612	HAS1/FER/YES1	3
BP	GO:0042033	chemokine biosynthetic process	3/1045	13/16266	0.0465798	0.40612	IFNG/TLR3/SIGIRR	3
BP	GO:0045086	positive regulation of interleukin-2 biosynthetic process	3/1045	13/16266	0.0465798	0.40612	CD4/CD80/CARD11	3
BP	GO:0045717	negative regulation of fatty acid biosynthetic process	3/1045	13/16266	0.0465798	0.40612	APOC3/ACADL/APOC1	3
BP	GO:0045836	positive regulation of meiotic nuclear division	3/1045	13/16266	0.0465798	0.40612	CAMK2B/UBE2B/DMRT1	3
BP	GO:0050855	regulation of B cell receptor signaling pathway	3/1045	13/16266	0.0465798	0.40612	PRKCH/CMTM3/GCSAM	3
BP	GO:0071625	vocalization behavior	3/1045	13/16266	0.0465798	0.40612	NRXN3/SRPX2/SHANK2	3
BP	GO:0090128	regulation of synapse maturation	3/1045	13/16266	0.0465798	0.40612	NRXN3/CAMK2B/DAB2IP	3
BP	GO:2000810	regulation of bicellular tight junction assembly	3/1045	13/16266	0.0465798	0.40612	PRKCH/GPBAR1/MYO1C	3
BP	GO:0008202	steroid metabolic process	26/1045	286/16266	0.0467336	0.406704	CYP46A1/MSMO1/GAL/DHRS9/LIPE/SLC27A5/REST/SLCO1A2/CYP2D6/PRKAG2/PPARGC1A/MVK/IFNG/PRLR/SCAP/ACADL/SCP2/LEPR/APOC1/CYP1A1/OSBPL1A/KCNMA1/LEP/RXRA/CYP2B6/CELA3B	26
BP	GO:0032355	response to estradiol	13/1045	121/16266	0.0469626	0.406774	GRN/PDGFB/AREG/CRYAB/PRDM2/MYOG/ASS1/EGFR/SLC6A1/KAT5/TH/PTCH1/HMBS	13
BP	GO:0007568	aging	24/1045	260/16266	0.0470474	0.406774	CTNNA1/POLB/ENO3/CRYAB/SLC1A2/MAPK14/PDE4D/SCAP/PRDM2/NEK6/CDKN1A/ASS1/SERPINF1/CYP1A1/CAST/NSMCE2/COL3A1/CTC1/TH/LCK/MAGEA2/MAGEA2B/RXRA/OPA1	24
BP	GO:0002221	pattern recognition receptor signaling pathway	18/1045	183/16266	0.04724	0.406774	PGLYRP1/MAP2K3/TNIP3/CACTIN/C1QBP/MAPK10/MAPK14/RPS6KA1/FFAR2/CD36/DAB2IP/FLOT1/ARRB2/REG3G/UBC/TLR3/CTSB/MYD88	18
BP	GO:0030799	regulation of cyclic nucleotide metabolic process	16/1045	158/16266	0.0474145	0.406774	GUCA1A/CALCRL/GNAS/PTHLH/AVP/PDE4D/PTK2B/ADCY7/VIP/NTRK2/PTH/CALM2/CALM3/OXER1/PDE2A/GRM7	16
BP	GO:0003300	cardiac muscle hypertrophy	7/1045	52/16266	0.0474366	0.406774	IGF1/HDAC4/CAMTA2/AKAP1/SORBS2/PI16/LEP	7
BP	GO:0032611	interleukin-1 beta production	7/1045	52/16266	0.0474366	0.406774	ACP5/IFNG/FOXP1/CASP1/ARRB2/IFNAR1/NLRP3	7
BP	GO:0032652	regulation of interleukin-1 production	7/1045	52/16266	0.0474366	0.406774	ACP5/IFNG/FOXP1/CASP1/ARRB2/IFNAR1/NLRP3	7
BP	GO:0090398	cellular senescence	7/1045	52/16266	0.0474366	0.406774	MAPK14/NEK6/CDKN1A/NSMCE2/MAGEA2/MAGEA2B/OPA1	7
BP	GO:0034504	protein localization to nucleus	28/1045	313/16266	0.0477047	0.408324	IGF1/FBXW11/FYB/GCKR/ZNF268/KANK1/IFNG/MAPK14/MDFI/SEMA5A/AKAP1/CDKN1A/SYNE1/CD36/DAB2IP/PRICKLE1/BBS4/SMAD4/EGFR/GNAQ/NLRP3/TLR3/SUN1/BANP/LEP/PARP10/PDE2A/POU5F1	28
BP	GO:0043467	regulation of generation of precursor metabolites and energy	10/1045	86/16266	0.0486169	0.411581	MLXIPL/IGF1/HDAC4/PRKAG2/PPARGC1A/MYOG/CBFA2T3/PTH/PPP1CA/PPP1R3E	10
BP	GO:0051341	regulation of oxidoreductase activity	10/1045	86/16266	0.0486169	0.411581	DNM2/IFNG/PTK2B/GCHFR/EGFR/CALM2/CALM3/CYGB/GDNF/NOS1AP	10
BP	GO:0030517	negative regulation of axon extension	4/1045	22/16266	0.0490522	0.411581	IFRD1/SEMA5A/BCL11A/DRAXIN	4
BP	GO:0032365	intracellular lipid transport	4/1045	22/16266	0.0490522	0.411581	PRKAG2/CPT1A/SCP2/CPT1B	4
BP	GO:0042094	interleukin-2 biosynthetic process	4/1045	22/16266	0.0490522	0.411581	CD4/CD276/CD80/CARD11	4
BP	GO:0043171	peptide catabolic process	4/1045	22/16266	0.0490522	0.411581	TRHDE/GGT1/CTSH/ADAMTS13	4
BP	GO:0043252	sodium-independent organic anion transport	4/1045	22/16266	0.0490522	0.411581	SLCO1A2/AVP/SLCO2B1/SLC22A24	4
BP	GO:0050716	positive regulation of interleukin-1 secretion	4/1045	22/16266	0.0490522	0.411581	IFNG/CASP1/IFNAR1/NLRP3	4
BP	GO:0060004	reflex	4/1045	22/16266	0.0490522	0.411581	HPN/FOXP2/KCNMA1/TMC1	4
BP	GO:0072525	pyridine-containing compound biosynthetic process	4/1045	22/16266	0.0490522	0.411581	NADK/PNPO/NMNAT3/ASPDH	4
BP	GO:0090103	cochlea morphogenesis	4/1045	22/16266	0.0490522	0.411581	EYA1/HPN/ZEB1/DVL3	4
BP	GO:0038093	Fc receptor signaling pathway	31/1045	354/16266	0.049294	0.41287	CAMK2B/CAMK2A/FBXW11/PDGFB/CSF2RB/MAPK10/GAB1/CD80/CDKN1A/NFATC1/DAB2IP/KSR1/FCGR2A/MYO10/EGFR/NCAM1/UBC/FER/ELMO1/NRG1/NRG2/CALM2/CALM3/PTK2/YES1/LCK/GRIN2A/PLA2G6/MYO1C/PLCG2/CARD11	31
BP	GO:0051591	response to cAMP	11/1045	98/16266	0.0495097	0.413936	CPS1/CREM/AREG/PDE4D/PTK2B/AKAP1/ASS1/REN/DMTN/SFTPC/WNT10B	11
BP	GO:0000060	protein import into nucleus, translocation	6/1045	42/16266	0.0502519	0.418646	IGF1/GCKR/IFNG/CDKN1A/PARP10/PDE2A	6
BP	GO:0071398	cellular response to fatty acid	6/1045	42/16266	0.0502519	0.418646	CPS1/GNAS/PPARGC1A/CPT1A/FFAR2/ASS1	6
BP	GO:0046823	negative regulation of nucleocytoplasmic transport	9/1045	75/16266	0.050379	0.41896	FBXW11/ZNF268/MDFI/AKAP1/CD36/DAB2IP/NLRP3/PARP10/PDE2A	9
BP	GO:1903649	regulation of cytoplasmic transport	37/1045	436/16266	0.0506731	0.41998	IGF1/ATG5/FBXW11/ZNF268/KANK1/MAPK14/MDFI/SEMA5A/PDE4D/SEC16B/PTK2B/AKAP1/CDKN1A/CD36/DAB2IP/PRELID3A/SMAD4/XCL1/HAX1/EGFR/TCF7L2/HNMT/GNAQ/NRG1/CALM2/CALM3/NLRP3/TLR3/DTWD2/BRSK2/LEP/PARP10/PDE2A/IFNL3/DMD/POU5F1/WDR46	37
BP	GO:0006959	humoral immune response	17/1045	172/16266	0.0507707	0.41998	POU2F2/ST6GAL1/TREM2/C1QBP/IFNG/CFP/VIP/B2M/HLA-DQB1/C1S/PLA2G6/PROS1/IFNA10/CD55/YTHDF2/CFI/IFNA4	17
BP	GO:0021953	central nervous system neuron differentiation	17/1045	172/16266	0.0507707	0.41998	PAX6/PSEN1/LHX6/EPHA4/EPHB2/NTRK2/GNAQ/DRAXIN/EOMES/PTK2/LEP/ROBO2/PTCH1/DCC/GIGYF2/ATXN2/PLXNA4	17
BP	GO:0015721	bile acid and bile salt transport	5/1045	32/16266	0.0514966	0.422177	SLC27A5/SLCO1A2/SLCO2B1/RXRA/STARD10	5
BP	GO:0032743	positive regulation of interleukin-2 production	5/1045	32/16266	0.0514966	0.422177	CD4/CD276/PDE4D/CD80/CARD11	5
BP	GO:0044705	multi-organism reproductive behavior	5/1045	32/16266	0.0514966	0.422177	GRN/AVP/NPAS3/GNAQ/TH	5
BP	GO:0043242	negative regulation of protein complex disassembly	8/1045	64/16266	0.0515641	0.422177	TRIM54/EPS8/DMTN/C16orf45/FAM21C/GAS2L1/CAPZA2/GAS2L2	8
BP	GO:0071346	cellular response to interferon-gamma	14/1045	135/16266	0.0516998	0.422177	CD44/CAMK2B/CAMK2A/CCL22/IFNG/ASS1/TRIM22/XCL1/NCAM1/B2M/HLA-DQB1/CIITA/HLA-DRA/CCL14	14
BP	GO:1902275	regulation of chromatin organization	14/1045	135/16266	0.0516998	0.422177	ATG5/RNF40/PPARGC1A/PADI2/UBE2B/WBP2/SMAD4/TLK2/PAXBP1/NSD1/PHF8/PARP10/POU5F1/TADA2A	14
BP	GO:0014812	muscle cell migration	7/1045	53/16266	0.0517577	0.422177	IGF1/HDAC4/PDGFB/NDRG4/PPARGC1A/PDE4D/DDR1	7
BP	GO:0043488	regulation of mRNA stability	7/1045	53/16266	0.0517577	0.422177	APEX1/MAPK14/VIP/SCGB1A1/GDNF/MYD88/YTHDF2	7
BP	GO:0030856	regulation of epithelial cell differentiation	13/1045	123/16266	0.0523677	0.42641	PROM1/PAX6/PRKCH/RFX3/IFNG/PRLR/KIAA1109/REG3G/ZEB1/GNAQ/GDNF/WNT10B/PTCH1	13
BP	GO:0006090	pyruvate metabolic process	11/1045	99/16266	0.0526157	0.426944	MLXIPL/IGF1/HDAC4/ENO1/PRKAG2/ENO3/PPARGC1A/MYOG/CBFA2T3/ALDOA/HK1	11
BP	GO:0045185	maintenance of protein location	11/1045	99/16266	0.0526157	0.426944	CD4/EPB41L3/ZNF268/MDFI/SYNE1/BBS4/ANK3/HK1/SUN1/TLN2/PDIA2	11
BP	GO:0001667	ameboidal-type cell migration	26/1045	290/16266	0.0536107	0.430658	PFN2/TNS1/PDGFB/SRPX2/CTSH/HAS1/C1QBP/FOLR1/IFNG/SEMA5A/HRG/FOXP1/PTK2B/GLIPR2/RREB1/SERPINF1/DAB2IP/ITGB7/ITGB1/FER/DMTN/CYGB/BMPER/GDNF/PTK2/SEMA4A	26
BP	GO:0005977	glycogen metabolic process	9/1045	76/16266	0.0540398	0.430658	IGF1/CPS1/PRKAG2/UBC/PTH/CALM2/CALM3/PPP1CA/PPP1R3E	9
BP	GO:0050830	defense response to Gram-positive bacterium	9/1045	76/16266	0.0540398	0.430658	PGLYRP1/ACP5/TNFSF8/CD36/REG3G/VIP/TNFRSF14/B2M/MYD88	9
BP	GO:0034329	cell junction assembly	21/1045	225/16266	0.0547151	0.430658	CD9/PRKCH/CTNNA1/ACTN1/TNS1/EPB41L3/HRG/PTK2B/AJUBA/FLOT1/TBCD/ITGB1/PTPRK/DMTN/FBLIM1/PTK2/TLN2/GPBAR1/PKP3/GJA4/MYO1C	21
BP	GO:0035315	hair cell differentiation	6/1045	43/16266	0.0553646	0.430658	SLC4A7/SPINK5/KCNMA1/TMC1/JAG2/MYO6	6
BP	GO:0090199	regulation of release of cytochrome c from mitochondria	6/1045	43/16266	0.0553646	0.430658	IGF1/AVP/ARRB2/BCL2L11/MFF/OPA1	6
BP	GO:0006936	muscle contraction	26/1045	291/16266	0.0554381	0.430658	MAP2K3/CALCRL/HDAC4/TNNT1/MYH1/CRYAB/PDE4D/CKMT2/DTNA/SULF1/CHRNA1/ALDOA/KCNMA1/TNNI1/CALM2/CALM3/SLMAP/TPM4/GDNF/KCNB2/LCK/SCN5A/STAC3/MYH6/DMD/FXYD1	26
BP	GO:0006970	response to osmotic stress	8/1045	65/16266	0.0556429	0.430658	AVP/PTK2B/SCN2A/HNMT/KCNMA1/MAPK13/TLR3/TH	8
BP	GO:0002700	regulation of production of molecular mediator of immune response	11/1045	100/16266	0.0558497	0.430658	ATG5/IFNG/TRIM6/FFAR2/CD36/XCL1/TNFRSF14/TNFSF13/NLRP3/TLR3/B2M	11
BP	GO:0030804	positive regulation of cyclic nucleotide biosynthetic process	11/1045	100/16266	0.0558497	0.430658	GUCA1A/CALCRL/GNAS/PTHLH/AVP/ADCY7/VIP/NTRK2/PTH/CALM2/CALM3	11
BP	GO:0002224	toll-like receptor signaling pathway	15/1045	149/16266	0.0559398	0.430658	MAP2K3/TNIP3/CACTIN/MAPK10/MAPK14/RPS6KA1/CD36/DAB2IP/FLOT1/ARRB2/REG3G/UBC/TLR3/CTSB/MYD88	15
BP	GO:0010171	body morphogenesis	7/1045	54/16266	0.0563184	0.430658	CDON/MMP2/GNAS/STRA6/IFT122/ANKRD11/MAB21L2	7
BP	GO:0014897	striated muscle hypertrophy	7/1045	54/16266	0.0563184	0.430658	IGF1/HDAC4/CAMTA2/AKAP1/SORBS2/PI16/LEP	7
BP	GO:0045912	negative regulation of carbohydrate metabolic process	7/1045	54/16266	0.0563184	0.430658	HDAC4/GCKR/PPARGC1A/TMEM59/LEPR/MYOG/CBFA2T3	7
BP	GO:0007026	negative regulation of microtubule depolymerization	4/1045	23/16266	0.0564709	0.430658	TRIM54/C16orf45/GAS2L1/GAS2L2	4
BP	GO:0010882	regulation of cardiac muscle contraction by calcium ion signaling	4/1045	23/16266	0.0564709	0.430658	HDAC4/CALM2/CALM3/DMD	4
BP	GO:0014009	glial cell proliferation	4/1045	23/16266	0.0564709	0.430658	PRKCH/AREG/PTK2B/ETV5	4
BP	GO:0021952	central nervous system projection neuron axonogenesis	4/1045	23/16266	0.0564709	0.430658	EPHA4/EPHB2/DCC/PLXNA4	4
BP	GO:0032438	melanosome organization	4/1045	23/16266	0.0564709	0.430658	AP3D1/AP3B1/AP1G1/PMEL	4
BP	GO:0042573	retinoic acid metabolic process	4/1045	23/16266	0.0564709	0.430658	DHRS9/STRA6/CYP1A1/BCO2	4
BP	GO:0046640	regulation of alpha-beta T cell proliferation	4/1045	23/16266	0.0564709	0.430658	CD80/XCL1/TNFRSF14/CD55	4
BP	GO:0055069	zinc ion homeostasis	4/1045	23/16266	0.0564709	0.430658	AP3D1/SLC39A14/SLC30A3/LCK	4
BP	GO:0072661	protein targeting to plasma membrane	4/1045	23/16266	0.0564709	0.430658	ANK3/KCNB2/PTCH1/SMURF1	4
BP	GO:0006067	ethanol metabolic process	3/1045	14/16266	0.0565339	0.430658	ALDH3B1/ADH5/ADH4	3
BP	GO:0021819	layer formation in cerebral cortex	3/1045	14/16266	0.0565339	0.430658	DAB2IP/C16orf45/ADGRG1	3
BP	GO:0021978	telencephalon regionalization	3/1045	14/16266	0.0565339	0.430658	PAX6/EOMES/ADGRG1	3
BP	GO:0050755	chemokine metabolic process	3/1045	14/16266	0.0565339	0.430658	IFNG/TLR3/SIGIRR	3
BP	GO:0051457	maintenance of protein location in nucleus	3/1045	14/16266	0.0565339	0.430658	SYNE1/BBS4/SUN1	3
BP	GO:0051797	regulation of hair follicle development	3/1045	14/16266	0.0565339	0.430658	GAL/SMAD4/WNT10B	3
BP	GO:0072216	positive regulation of metanephros development	3/1045	14/16266	0.0565339	0.430658	PDGFB/GDNF/BASP1	3
BP	GO:0072574	hepatocyte proliferation	3/1045	14/16266	0.0565339	0.430658	HPN/IFNG/RPS6KA1	3
BP	GO:0072575	epithelial cell proliferation involved in liver morphogenesis	3/1045	14/16266	0.0565339	0.430658	HPN/IFNG/RPS6KA1	3
BP	GO:0086003	cardiac muscle cell contraction	3/1045	14/16266	0.0565339	0.430658	PDE4D/SCN5A/FXYD1	3
BP	GO:0090005	negative regulation of establishment of protein localization to plasma membrane	3/1045	14/16266	0.0565339	0.430658	PPP2R5A/TMEM59/PPFIA1	3
BP	GO:0098659	inorganic cation import into cell	3/1045	14/16266	0.0565339	0.430658	PICALM/SLC11A2/B2M	3
BP	GO:0099587	inorganic ion import into cell	3/1045	14/16266	0.0565339	0.430658	PICALM/SLC11A2/B2M	3
BP	GO:0051650	establishment of vesicle localization	19/1045	200/16266	0.0565516	0.430658	GRN/AP3D1/RAB27A/PFN2/DNM2/RIMS1/PSEN1/NAPA/SEC16B/COPA/SYT5/UNC13A/AP3B1/STXBP1/BBS4/SYT8/SAR1B/TH/DCTN1	19
BP	GO:0034330	cell junction organization	23/1045	252/16266	0.0565688	0.430658	CD9/PRKCH/CTNNA1/ACTN1/TNS1/EPB41L3/NUMBL/HRG/PTK2B/AJUBA/FLOT1/TBCD/ITGB1/PTPRK/DMTN/MPZ/FBLIM1/PTK2/TLN2/GPBAR1/PKP3/GJA4/MYO1C	23
BP	GO:0009205	purine ribonucleoside triphosphate metabolic process	20/1045	213/16266	0.0567778	0.431548	NADK/MLXIPL/IGF1/NDUFS1/HDAC4/ENO1/COQ9/ATP6V0A4/PRKAG2/ENO3/PPARGC1A/MYOG/CBFA2T3/COX4I1/FIGNL1/ALDOA/HK1/NDUFV1/BDNF/MYH6	20
BP	GO:0019098	reproductive behavior	5/1045	33/16266	0.0576158	0.433434	GRN/AVP/NPAS3/GNAQ/TH	5
BP	GO:0050701	interleukin-1 secretion	5/1045	33/16266	0.0576158	0.433434	IFNG/FOXP1/CASP1/IFNAR1/NLRP3	5
BP	GO:0071867	response to monoamine	5/1045	33/16266	0.0576158	0.433434	DNM2/GNAS/PPARGC1A/PDE4D/BDNF	5
BP	GO:0071375	cellular response to peptide hormone stimulus	40/1045	482/16266	0.0577347	0.433434	CPS1/CAMK2B/CAMK2A/GNAS/PDGFB/CSF2RB/ATP6V0A4/PRKAG2/KANK1/GNRHR/GAB1/GNB3/PRLR/AKAP1/ADCY7/ASS1/MEN1/DAB2IP/KSR1/AHSG/EGFR/IGFBP1/NCAM1/UBC/FER/NRG1/NRG2/CALM2/CALM3/GNG3/PTK2/LEP/YES1/LCK/GRIN2A/RXRA/MBD5/ATP6V1G2/CPEB1/STRADA	40
BP	GO:0006073	cellular glucan metabolic process	9/1045	77/16266	0.0578694	0.433434	IGF1/CPS1/PRKAG2/UBC/PTH/CALM2/CALM3/PPP1CA/PPP1R3E	9
BP	GO:0014013	regulation of gliogenesis	9/1045	77/16266	0.0578694	0.433434	PRKCH/PRMT5/PRPF19/EPHA4/MYCN/C16orf45/CDK1/CSF1/ETV5	9
BP	GO:0044042	glucan metabolic process	9/1045	77/16266	0.0578694	0.433434	IGF1/CPS1/PRKAG2/UBC/PTH/CALM2/CALM3/PPP1CA/PPP1R3E	9
BP	GO:1901879	regulation of protein depolymerization	9/1045	77/16266	0.0578694	0.433434	SEMA5A/TRIM54/EPS8/DMTN/C16orf45/FAM21C/GAS2L1/CAPZA2/GAS2L2	9
BP	GO:0051346	negative regulation of hydrolase activity	34/1045	400/16266	0.0579397	0.433434	CD44/WNK1/PICALM/AVP/CSNK2A1/HPN/CRYAB/APOC3/HRG/GNAT1/LEPR/RPS6KA1/PPP2R4/APOC1/SERPINF1/SPINK5/DAB2IP/GCHFR/BBS4/ARRB2/AHSG/CAST/DGKI/CPAMD8/PI16/PXK/SERPINA9/CST1/CSRNP3/PROS1/SPOCK3/SERPINA3/NAIP/CARD18	34
BP	GO:0019884	antigen processing and presentation of exogenous antigen	17/1045	175/16266	0.0579517	0.433434	ABCB5/AP3D1/DNM2/AP1B1/KLC1/AP3B1/DCTN4/CD36/OSBPL1A/UBC/SAR1B/B2M/AP1G1/HLA-DQB1/AP1S2/HLA-DRA/DCTN1	17
BP	GO:0009259	ribonucleotide metabolic process	41/1045	496/16266	0.0580523	0.433495	NADK/MLXIPL/IGF1/NDUFS1/GUCA1A/CALCRL/HDAC4/ENO1/GNAS/PTHLH/COQ9/AVP/PDE4C/ATP6V0A4/PRKAG2/ENO3/MPP2/PPARGC1A/PDE4D/PTK2B/ADCY7/MYOG/CBFA2T3/MPP1/COX4I1/FIGNL1/VIP/CASK/NTRK2/ALDOA/PTH/HK1/CALM2/CALM3/OXER1/NDUFV1/BDNF/PDE2A/GRM7/MYH6/CARD11	41
BP	GO:0035637	multicellular organismal signaling	13/1045	125/16266	0.0581831	0.433779	NRCAM/AVP/IFNG/PDE4D/SCN2A/CHRNA1/ANK3/SCN3A/KCNMA1/CALM2/CALM3/SCN5A/GRM7	13
BP	GO:0090596	sensory organ morphogenesis	23/1045	253/16266	0.0586205	0.434945	PROM1/PAX6/SLC4A7/CDON/ITGA8/RPGRIP1/VSX1/EYA1/HPN/GNAT1/EPHB2/STRA6/BBS4/CNGA3/NTRK2/ZEB1/ABR/RDH13/DVL3/IFT122/BDNF/TH/MYO6	23
BP	GO:0043901	negative regulation of multi-organism process	15/1045	150/16266	0.0586414	0.434945	IGF1/REST/CACTIN/PTGDS/C1QBP/IFNG/TRIM6/ILF3/CD36/TARBP2/PARP10/SIGIRR/IFNL3/PCBP2/WEE2	15
BP	GO:0051251	positive regulation of lymphocyte activation	22/1045	240/16266	0.0588798	0.434945	CD4/IGF1/AP3D1/DHPS/CD276/IFNG/CD80/CDKN1A/AP3B1/TESPA1/XCL1/TNFRSF14/TNFSF13/NLRP3/AP1G1/TMIGD2/YES1/HLA-DQB1/LCK/CD55/CARD11/HLA-DRA	22
BP	GO:0051017	actin filament bundle assembly	12/1045	113/16266	0.0589043	0.434945	GAS7/PFN2/ACTN1/ASAP3/PTK2B/MYO1B/PPFIA1/SPIRE1/BBS4/EPS8/DMTN/ESPN	12
BP	GO:0030816	positive regulation of cAMP metabolic process	10/1045	89/16266	0.0589461	0.434945	CALCRL/GNAS/PTHLH/AVP/ADCY7/VIP/NTRK2/PTH/CALM2/CALM3	10
BP	GO:0060048	cardiac muscle contraction	10/1045	89/16266	0.0589461	0.434945	MAP2K3/HDAC4/PDE4D/TNNI1/CALM2/CALM3/SCN5A/MYH6/DMD/FXYD1	10
BP	GO:0050673	epithelial cell proliferation	29/1045	333/16266	0.0589897	0.434945	PAX6/IGF1/GRN/PSEN1/PDGFB/EYA1/HPN/AREG/IFNG/SEMA5A/RPS6KA1/RREB1/FOXP2/SERPINF1/MEN1/DAB2IP/SULF1/REG3G/VIP/EGFR/CASK/BTBD10/PTPRK/IFT122/BMPER/WNT10B/SCN5A/PTCH1/NOX5	29
BP	GO:0002287	alpha-beta T cell activation involved in immune response	6/1045	44/16266	0.0607795	0.44464	IFNG/FOXP1/CD80/NLRP3/EOMES/SEMA4A	6
BP	GO:0002293	alpha-beta T cell differentiation involved in immune response	6/1045	44/16266	0.0607795	0.44464	IFNG/FOXP1/CD80/NLRP3/EOMES/SEMA4A	6
BP	GO:0034113	heterotypic cell-cell adhesion	6/1045	44/16266	0.0607795	0.44464	CD44/NRCAM/FLOT1/ITGB7/ITGB1/GLDN	6
BP	GO:0042992	negative regulation of transcription factor import into nucleus	6/1045	44/16266	0.0607795	0.44464	FBXW11/ZNF268/MDFI/AKAP1/CD36/NLRP3	6
BP	GO:0051055	negative regulation of lipid biosynthetic process	6/1045	44/16266	0.0607795	0.44464	REST/PDGFB/APOC3/SCAP/ACADL/APOC1	6
BP	GO:0001836	release of cytochrome c from mitochondria	7/1045	55/16266	0.0611208	0.445376	IGF1/AVP/TIMM50/ARRB2/BCL2L11/MFF/OPA1	7
BP	GO:2001244	positive regulation of intrinsic apoptotic signaling pathway	7/1045	55/16266	0.0611208	0.445376	IL20RA/BCLAF1/SEPT4/SPOP/BCL2L11/BUB1/LCK	7
BP	GO:0007416	synapse assembly	13/1045	126/16266	0.0612477	0.445376	NRXN3/ACHE/NRCAM/SRPX2/EPHB2/NTRK2/NRG1/SHANK2/PTK2/BDNF/ROBO2/SLITRK2/MYO6	13
BP	GO:0007623	circadian rhythm	19/1045	202/16266	0.0612606	0.445376	SLC9A3/FBXW11/CREM/PRMT5/AVP/PTGDS/MAPK10/PPARGC1A/CPT1A/NTRK2/UBC/GNAQ/KCNMA1/PASD1/SFTPC/NPAS2/PPP1CA/LEP/TH	19
BP	GO:0002694	regulation of leukocyte activation	35/1045	416/16266	0.0618281	0.447027	SLC7A2/PGLYRP1/CD4/IGF1/AP3D1/GAL/DHPS/SOS2/CD276/IFNG/CD80/CDKN1A/AP3B1/SPINK5/TESPA1/XCL1/ZEB1/SCGB1A1/FER/MERTK/TNFRSF14/ABR/TNFSF13/NLRP3/AP1G1/TMIGD2/YES1/HLA-DQB1/FES/LCK/CD55/IFNL3/CARD11/HLA-DRA/LST1	35
BP	GO:0019218	regulation of steroid metabolic process	9/1045	78/16266	0.0618696	0.447027	GAL/REST/IFNG/SCAP/ACADL/SCP2/APOC1/KCNMA1/LEP	9
BP	GO:0035249	synaptic transmission, glutamatergic	9/1045	78/16266	0.0618696	0.447027	PSEN1/NAPA/PTK2B/UNC13A/GRIK4/GRIA1/DGKI/GRIN2A/GRM7	9
BP	GO:0070613	regulation of protein processing	9/1045	78/16266	0.0618696	0.447027	HPN/C1QBP/TMEM59/CFP/RHBDD1/PROS1/CD55/CFI/NAIP	9
BP	GO:0006109	regulation of carbohydrate metabolic process	16/1045	164/16266	0.0624317	0.449612	MLXIPL/IGF1/HDAC4/GCKR/PDGFB/PRKAG2/PPARGC1A/TMEM59/LEPR/PTK2B/MYOG/CBFA2T3/PTH/PPP1CA/LEP/PPP1R3E	16
BP	GO:0071216	cellular response to biotic stimulus	16/1045	164/16266	0.0624317	0.449612	TNIP3/TREM2/CACTIN/IFNG/MAPK14/PDE4D/CD80/ASS1/CMPK2/CD36/DAB2IP/NLRP3/IL24/B2M/SIGIRR/CD55	16
BP	GO:0051249	regulation of lymphocyte activation	31/1045	362/16266	0.0626262	0.449612	PGLYRP1/CD4/IGF1/AP3D1/GAL/DHPS/SOS2/CD276/IFNG/CD80/CDKN1A/AP3B1/SPINK5/TESPA1/XCL1/ZEB1/SCGB1A1/MERTK/TNFRSF14/TNFSF13/NLRP3/AP1G1/TMIGD2/YES1/HLA-DQB1/LCK/CD55/IFNL3/CARD11/HLA-DRA/LST1	31
BP	GO:0043244	regulation of protein complex disassembly	10/1045	90/16266	0.0626837	0.449612	SEMA5A/TRIM54/EPS8/DMTN/EIF5A2/C16orf45/FAM21C/GAS2L1/CAPZA2/GAS2L2	10
BP	GO:0050807	regulation of synapse organization	11/1045	102/16266	0.0627075	0.449612	NRXN3/CAMK2B/SRPX2/EPHB2/DAB2IP/NTRK2/PTK2/BDNF/ROBO2/SLITRK2/ETV5	11
BP	GO:0051054	positive regulation of DNA metabolic process	14/1045	139/16266	0.0630137	0.451117	IGF1/PDGFB/APEX1/EYA1/AREG/PPARGC1A/IFNG/UBE2B/ARRB2/EGFR/DBF4B/TNFSF13/NPAS2/CTC1	14
BP	GO:0030100	regulation of endocytosis	18/1045	190/16266	0.0635243	0.453125	RAB27A/PICALM/DNM2/PACSIN2/UNC119/APOC3/APOC1/CD36/FLOT1/ARRB2/AHSG/MERTK/ABR/B2M/PROS1/PLCG2/SCAMP5/ATXN2	18
BP	GO:1901985	positive regulation of protein acetylation	5/1045	34/16266	0.064133	0.453125	PPARGC1A/WBP2/SMAD4/KAT5/TADA2A	5
BP	GO:2001259	positive regulation of cation channel activity	5/1045	34/16266	0.064133	0.453125	GAL/CALM2/CALM3/PLCG2/NOS1AP	5
BP	GO:0046634	regulation of alpha-beta T cell activation	8/1045	67/16266	0.0644011	0.453125	AP3D1/IFNG/CD80/AP3B1/XCL1/TNFRSF14/NLRP3/CD55	8
BP	GO:0006171	cAMP biosynthetic process	13/1045	127/16266	0.0644183	0.453125	CALCRL/GNAS/PTHLH/AVP/ADCY7/VIP/NTRK2/PTH/CALM2/CALM3/OXER1/PDE2A/GRM7	13
BP	GO:0035235	ionotropic glutamate receptor signaling pathway	4/1045	24/16266	0.0644557	0.453125	PTK2B/GRIK4/GRIA1/GRIN2A	4
BP	GO:0042501	serine phosphorylation of STAT protein	4/1045	24/16266	0.0644557	0.453125	IFNG/IL24/IFNA10/IFNA4	4
BP	GO:0048753	pigment granule organization	4/1045	24/16266	0.0644557	0.453125	AP3D1/AP3B1/AP1G1/PMEL	4
BP	GO:0051647	nucleus localization	4/1045	24/16266	0.0644557	0.453125	DOCK7/SYNE1/DCTN4/PTK2	4
BP	GO:0060444	branching involved in mammary gland duct morphogenesis	4/1045	24/16266	0.0644557	0.453125	AREG/CSF1/DDR1/ETV5	4
BP	GO:0071549	cellular response to dexamethasone stimulus	4/1045	24/16266	0.0644557	0.453125	ASS1/SERPINF1/SMYD3/HMBS	4
BP	GO:1901385	regulation of voltage-gated calcium channel activity	4/1045	24/16266	0.0644557	0.453125	CALM2/CALM3/NOS1AP/DMD	4
BP	GO:0042493	response to drug	35/1045	418/16266	0.0652348	0.456697	CPS1/ATG5/HDAC4/GAL/REST/GNAS/CYP2D6/PDGFB/ABCC1/ENO3/PPARGC1A/CPT1A/SLC1A2/IFNG/UBE2B/PTK2B/CDKN1A/ASS1/CYP1A1/REN/SCGB1A1/PTH/DVL3/B2M/CA4/CYP2S1/BDNF/TH/LCK/GRIN2A/PTCH1/PDE2A/MYO6/CYP2B6/HMBS	35
BP	GO:0010639	negative regulation of organelle organization	26/1045	296/16266	0.0652478	0.456697	IGF1/ATG5/PFN2/AVP/CSNK2A1/KANK1/UBE2B/GMFG/PPFIA1/DMRT1/TRIM54/BBS4/ARRB2/TBCD/EPS8/DMTN/ANAPC10/C16orf45/BUB1/FAM21C/PHF8/GAS2L1/ESPN/OPA1/CAPZA2/GAS2L2	26
BP	GO:1903317	regulation of protein maturation	9/1045	79/16266	0.0660417	0.456697	HPN/C1QBP/TMEM59/CFP/RHBDD1/PROS1/CD55/CFI/NAIP	9
BP	GO:0043112	receptor metabolic process	14/1045	140/16266	0.0660824	0.456697	CALCRL/PICALM/DNM2/PSEN1/ACHE/KIF16B/SCAP/FLOT1/ARRB2/GRIA1/NRG1/PLCG2/SMURF1/ATXN2	14
BP	GO:0014896	muscle hypertrophy	7/1045	56/16266	0.066166	0.456697	IGF1/HDAC4/CAMTA2/AKAP1/SORBS2/PI16/LEP	7
BP	GO:0043487	regulation of RNA stability	7/1045	56/16266	0.066166	0.456697	APEX1/MAPK14/VIP/SCGB1A1/GDNF/MYD88/YTHDF2	7
BP	GO:0051651	maintenance of location in cell	11/1045	103/16266	0.0663339	0.456697	CD4/EPB41L3/ZNF268/MDFI/SYNE1/BBS4/ANK3/HK1/SUN1/TLN2/PDIA2	11
BP	GO:1901861	regulation of muscle tissue development	11/1045	103/16266	0.0663339	0.456697	CDON/HDAC4/PPARGC1A/MAPK14/MYOG/FLOT1/PRICKLE1/NRG1/PI16/WNT10B/BDNF	11
BP	GO:0001709	cell fate determination	6/1045	45/16266	0.0664973	0.456697	IFRD1/PAX6/POU6F2/PTCH1/POU5F1/EBF2	6
BP	GO:0021762	substantia nigra development	6/1045	45/16266	0.0664973	0.456697	PADI2/PLP1/TTBK1/CALM2/CALM3/BASP1	6
BP	GO:0021795	cerebral cortex cell migration	6/1045	45/16266	0.0664973	0.456697	PSEN1/LHX6/DAB2IP/EGFR/C16orf45/ADGRG1	6
BP	GO:0090303	positive regulation of wound healing	6/1045	45/16266	0.0664973	0.456697	KANK1/RREB1/CD36/REG3G/DMTN/SELP	6
BP	GO:0001843	neural tube closure	10/1045	91/16266	0.066571	0.456697	FOLR1/LIAS/SHROOM3/PRICKLE1/BBS4/KDM6A/DVL3/IFT122/PTCH1/OPA1	10
BP	GO:1903825	organic acid transmembrane transport	10/1045	91/16266	0.066571	0.456697	SLC7A2/SLC27A5/PRKAG2/CPT1A/SLC1A2/SLC5A6/SLC3A1/SLC5A12/SLC7A7/CPT1B	10
BP	GO:0002335	mature B cell differentiation	3/1045	15/16266	0.0674024	0.456697	POU2F2/PTK2B/PLCG2	3
BP	GO:0002374	cytokine secretion involved in immune response	3/1045	15/16266	0.0674024	0.456697	ATG5/TRIM6/TNFRSF14	3
BP	GO:0032516	positive regulation of phosphoprotein phosphatase activity	3/1045	15/16266	0.0674024	0.456697	PPP2R4/CALM2/CALM3	3
BP	GO:0034375	high-density lipoprotein particle remodeling	3/1045	15/16266	0.0674024	0.456697	LIPG/APOC3/APOC1	3
BP	GO:0040023	establishment of nucleus localization	3/1045	15/16266	0.0674024	0.456697	SYNE1/DCTN4/PTK2	3
BP	GO:0042711	maternal behavior	3/1045	15/16266	0.0674024	0.456697	AVP/NPAS3/GNAQ	3
BP	GO:0051016	barbed-end actin filament capping	3/1045	15/16266	0.0674024	0.456697	EPS8/FAM21C/CAPZA2	3
BP	GO:0051446	positive regulation of meiotic cell cycle	3/1045	15/16266	0.0674024	0.456697	CAMK2B/UBE2B/DMRT1	3
BP	GO:0060442	branching involved in prostate gland morphogenesis	3/1045	15/16266	0.0674024	0.456697	IGF1/CD44/RXRA	3
BP	GO:0060746	parental behavior	3/1045	15/16266	0.0674024	0.456697	AVP/NPAS3/GNAQ	3
BP	GO:1901018	positive regulation of potassium ion transmembrane transporter activity	3/1045	15/16266	0.0674024	0.456697	GAL/DNM2/NOS1AP	3
BP	GO:0010810	regulation of cell-substrate adhesion	16/1045	166/16266	0.0680843	0.460651	DNM2/KANK1/C1QBP/HRG/PTK2B/RREB1/MEN1/CD36/TBCD/CASK/ABI3BP/DMTN/PTK2/FAM21C/CSF1/DDR1	16
BP	GO:0009581	detection of external stimulus	17/1045	179/16266	0.0685765	0.463178	GUCA1A/PKD2L2/HPN/UNC119/APOC3/PITPNM1/GNAT1/STRA6/ARRB2/TRPM8/GNAQ/CALM2/CALM3/TMC1/EYS/BCO2/CNGA1	17
BP	GO:0006575	cellular modified amino acid metabolic process	20/1045	218/16266	0.0686556	0.463178	IYD/CPS1/FOLH1/DHPS/GGT1/GGTLC2/GGTLC1/GGT2/PRODH/HPN/FOLR1/VNN2/PADI2/ASS1/CKMT2/SLC5A6/PLA2G2F/SERINC2/DIO3/PADI6	20
BP	GO:0043583	ear development	19/1045	205/16266	0.0688215	0.463629	IGF1/SLC4A7/ATG5/ITGA8/EYA1/HPN/EPHB2/STRA6/ZEB1/BCL2L11/KCNMA1/ABR/DVL3/BMPER/TMC1/BDNF/JAG2/MYO6/DDR1	19
BP	GO:0043647	inositol phosphate metabolic process	8/1045	68/16266	0.0690833	0.464724	PLCH1/SCP2/PTK2B/CALM2/CALM3/PPIP5K1/IP6K1/PLCG2	8
BP	GO:0098656	anion transmembrane transport	23/1045	258/16266	0.0696689	0.467991	SLC7A2/SLC4A7/SLC35C2/SLC27A5/SLCO1A2/FXYD3/SLC35A2/PRKAG2/CPT1A/SLC1A2/SLC17A2/ADAMTS8/SLCO2B1/SLC5A6/SLC3A1/SLC26A7/SLC5A12/SLC7A7/SLC4A5/SLC22A24/CPT1B/SLC22A31/FXYD1	23
BP	GO:0010594	regulation of endothelial cell migration	11/1045	104/16266	0.0700932	0.470116	PDGFB/SRPX2/SEMA5A/HRG/FOXP1/PTK2B/SERPINF1/DAB2IP/BMPER/PTK2/SEMA4A	11
BP	GO:0017157	regulation of exocytosis	15/1045	154/16266	0.0703331	0.470116	RAB27A/PFN2/REST/NAPA/SYT5/STXBP1/STXBP5L/TMEM27/FER/ABR/AP1G1/RIMS2/FES/SCAMP5/DOC2B	15
BP	GO:0034341	response to interferon-gamma	15/1045	154/16266	0.0703331	0.470116	CD44/CAMK2B/CAMK2A/CCL22/IFNG/ASS1/TRIM22/XCL1/NCAM1/ADAMTS13/B2M/HLA-DQB1/CIITA/HLA-DRA/CCL14	15
BP	GO:0046632	alpha-beta T cell differentiation	9/1045	80/16266	0.0703868	0.470116	AP3D1/TNFSF8/IFNG/FOXP1/CD80/AP3B1/NLRP3/EOMES/SEMA4A	9
BP	GO:0060606	tube closure	10/1045	92/16266	0.0706088	0.470927	FOLR1/LIAS/SHROOM3/PRICKLE1/BBS4/KDM6A/DVL3/IFT122/PTCH1/OPA1	10
BP	GO:0019433	triglyceride catabolic process	5/1045	35/16266	0.0710459	0.471863	CPS1/MGLL/LIPE/APOC3/PPP1CA	5
BP	GO:0032094	response to food	5/1045	35/16266	0.0710459	0.471863	CPS1/BBS4/CYP1A1/LEP/BDNF	5
BP	GO:0009199	ribonucleoside triphosphate metabolic process	20/1045	219/16266	0.0712205	0.471863	NADK/MLXIPL/IGF1/NDUFS1/HDAC4/ENO1/COQ9/ATP6V0A4/PRKAG2/ENO3/PPARGC1A/MYOG/CBFA2T3/COX4I1/FIGNL1/ALDOA/HK1/NDUFV1/BDNF/MYH6	20
BP	GO:0042692	muscle cell differentiation	30/1045	353/16266	0.0714128	0.471863	IFRD1/IGF1/CTNNA1/ATG5/CDON/HDAC4/ITGA8/SMARCA2/REST/MAPK14/POPDC2/MYOG/SYNE1/FLOT1/PRICKLE1/ZEB1/TCF7L2/ITGB1/MBNL1/CAST/OBSCN/SORBS2/NRG1/PI16/WNT10B/SMYD3/STAC3/RXRA/MYH6/DMD	30
BP	GO:0006826	iron ion transport	7/1045	57/16266	0.0714548	0.471863	PICALM/DNM2/SLC39A14/ATP6V0A4/SLC11A2/B2M/ATP6V1G2	7
BP	GO:0032623	interleukin-2 production	7/1045	57/16266	0.0714548	0.471863	CD4/CD276/PDE4D/CD80/XCL1/KAT5/CARD11	7
BP	GO:0048024	regulation of mRNA splicing, via spliceosome	7/1045	57/16266	0.0714548	0.471863	C1QBP/PRPF19/SLC39A5/SRRM4/CELF6/MBNL1/RBMY1A1	7
BP	GO:0007605	sensory perception of sound	14/1045	142/16266	0.0725141	0.47402	TBL1X/EYA1/HPN/ATP6V0A4/DNM1/CDH23/SRRM4/KCNMA1/ADGRV1/TMC1/TH/ESPN/GRM7/MYO6	14
BP	GO:0010657	muscle cell apoptotic process	6/1045	46/16266	0.0725179	0.47402	IGF1/CAMK2A/IFNG/PTK2B/ARRB2/NRG1	6
BP	GO:0010677	negative regulation of cellular carbohydrate metabolic process	6/1045	46/16266	0.0725179	0.47402	HDAC4/GCKR/PPARGC1A/LEPR/MYOG/CBFA2T3	6
BP	GO:0051353	positive regulation of oxidoreductase activity	6/1045	46/16266	0.0725179	0.47402	IFNG/PTK2B/CALM2/CALM3/GDNF/NOS1AP	6
BP	GO:0044262	cellular carbohydrate metabolic process	25/1045	286/16266	0.0726666	0.47402	MLXIPL/IGF1/CPS1/HDAC4/GCKR/HAS1/PRKAG2/PPARGC1A/TMEM59/LEPR/PTK2B/MYOG/CBFA2T3/UBC/PTH/HK1/ALG8/CALM2/CALM3/LALBA/PPIP5K1/PPP1CA/LEP/POMK/PPP1R3E	25
BP	GO:0061572	actin filament bundle organization	12/1045	117/16266	0.072696	0.47402	GAS7/PFN2/ACTN1/ASAP3/PTK2B/MYO1B/PPFIA1/SPIRE1/BBS4/EPS8/DMTN/ESPN	12
BP	GO:0002369	T cell cytokine production	4/1045	25/16266	0.0729963	0.47402	XCL1/NLRP3/B2M/CD55	4
BP	GO:0010800	positive regulation of peptidyl-threonine phosphorylation	4/1045	25/16266	0.0729963	0.47402	PRKAG2/TRIM6/CALM2/CALM3	4
BP	GO:0010880	regulation of release of sequestered calcium ion into cytosol by sarcoplasmic reticulum	4/1045	25/16266	0.0729963	0.47402	PDE4D/CALM2/CALM3/DMD	4
BP	GO:0015800	acidic amino acid transport	4/1045	25/16266	0.0729963	0.47402	PSEN1/SLC1A2/SLC6A1/SEPT2	4
BP	GO:0031114	regulation of microtubule depolymerization	4/1045	25/16266	0.0729963	0.47402	TRIM54/C16orf45/GAS2L1/GAS2L2	4
BP	GO:0033057	multicellular organismal reproductive behavior	4/1045	25/16266	0.0729963	0.47402	GRN/AVP/NPAS3/GNAQ	4
BP	GO:0046058	cAMP metabolic process	15/1045	155/16266	0.0734811	0.475849	CALCRL/GNAS/PTHLH/AVP/PDE4C/PDE4D/ADCY7/VIP/NTRK2/PTH/CALM2/CALM3/OXER1/PDE2A/GRM7	15
BP	GO:0050954	sensory perception of mechanical stimulus	15/1045	155/16266	0.0734811	0.475849	TBL1X/EYA1/HPN/ATP6V0A4/DNM1/CDH23/IFNG/SRRM4/KCNMA1/ADGRV1/TMC1/TH/ESPN/GRM7/MYO6	15
BP	GO:0030279	negative regulation of ossification	8/1045	69/16266	0.0739686	0.47714	HDAC4/AREG/PTK2B/MEN1/AHSG/SOST/PTCH1/SMURF1	8
BP	GO:0006493	protein O-linked glycosylation	11/1045	105/16266	0.0739863	0.47714	ST6GAL1/SLC35C2/C1GALT1/ST3GAL3/CFP/GALNT14/ADAMTS13/FKRP/POMK/MUC12/ISPD	11
BP	GO:0007631	feeding behavior	11/1045	105/16266	0.0739863	0.47714	GAL/CPT1A/STRA6/REN/UBR3/NTRK2/LEP/BDNF/TH/GRM7/GIGYF2	11
BP	GO:0002366	leukocyte activation involved in immune response	18/1045	194/16266	0.0743799	0.478697	PGLYRP1/RAB27A/PSEN1/IFNG/FOXP1/PTK2B/CD80/FER/ABR/TNFSF13/NLRP3/EOMES/AP1G1/FES/IFNA10/SEMA4A/PLCG2/IFNA4	18
BP	GO:1903828	negative regulation of cellular protein localization	13/1045	130/16266	0.074575	0.478697	PPP2R5A/FBXW11/ZNF268/MDFI/TMEM59/AKAP1/PPFIA1/CD36/DAB2IP/DMTN/NLRP3/PARP10/PDE2A	13
BP	GO:0051261	protein depolymerization	10/1045	93/16266	0.0747981	0.478697	SEMA5A/MICAL2/TRIM54/EPS8/DMTN/C16orf45/GAS2L1/CAPZA2/MICAL3/GAS2L2	10
BP	GO:0002028	regulation of sodium ion transport	9/1045	81/16266	0.0749057	0.478697	SLC9A3/DNM2/FXYD3/FXYD4/ANK3/WNK2/SCN5A/DMD/FXYD1	9
BP	GO:0043255	regulation of carbohydrate biosynthetic process	9/1045	81/16266	0.0749057	0.478697	IGF1/PDGFB/PPARGC1A/LEPR/PTK2B/PTH/PPP1CA/LEP/PPP1R3E	9
BP	GO:0006091	generation of precursor metabolites and energy	37/1045	451/16266	0.0750046	0.478697	MLXIPL/IGF1/CPS1/NDUFS1/HDAC4/ENO1/RUNX1T1/GNAS/COQ9/ACO2/AVP/PRKAG2/ENO3/PPARGC1A/GNB3/GNPDA1/LEPR/ADCY7/MYOG/SYT5/CBFA2T3/COX4I1/SUCLA2/STXBP1/ETFA/ALDOA/UBC/PTH/HK1/CALM2/CALM3/GNG3/NDUFV1/PPP1CA/LEP/BDNF/PPP1R3E	37
BP	GO:0032535	regulation of cellular component size	27/1045	314/16266	0.0750456	0.478697	IFRD1/PFN2/CLNS1A/DNM2/NRCAM/KANK1/SEMA5A/BCL11A/PTK2B/GMFG/PEX11B/ACTR3B/SPIRE1/BBS4/HAX1/GOLGA4/FER/EPS8/KCNMA1/DMTN/DRAXIN/FAM21C/BDNF/DCC/CAPZA2/L1CAM/PLXNA4	27
BP	GO:0060249	anatomical structure homeostasis	27/1045	314/16266	0.0750456	0.478697	PROM1/IL20RA/SPATA7/GNAS/PTHLH/APEX1/ACP5/CTSH/CDH23/PTK2B/CHRNA1/BBS4/ALDOA/PTH/NSMCE2/ADGRV1/B2M/ANKRD11/HIST3H3/NXNL1/CTC1/CSF1/RAD51D/SERPINA3/HIST4H4/DMD/GIGYF2	27
BP	GO:0001508	action potential	12/1045	118/16266	0.0764427	0.481209	IFNG/SCN2A/CHRNA1/ANK3/SCN3A/GNAQ/KCNMA1/GRIN2A/SCN5A/TPCN1/NOS1AP/DMD	12
BP	GO:0048515	spermatid differentiation	12/1045	118/16266	0.0764427	0.481209	SMARCA2/SEPT4/DDX25/UBE2B/SLIRP/TARBP2/BBS4/ZMYND15/RHBDD1/DDIAS/PDILT/OSBP2	12
BP	GO:0009144	purine nucleoside triphosphate metabolic process	20/1045	221/16266	0.0765434	0.481209	NADK/MLXIPL/IGF1/NDUFS1/HDAC4/ENO1/COQ9/ATP6V0A4/PRKAG2/ENO3/PPARGC1A/MYOG/CBFA2T3/COX4I1/FIGNL1/ALDOA/HK1/NDUFV1/BDNF/MYH6	20
BP	GO:0010675	regulation of cellular carbohydrate metabolic process	15/1045	156/16266	0.0767205	0.481209	MLXIPL/IGF1/HDAC4/GCKR/PRKAG2/PPARGC1A/TMEM59/LEPR/PTK2B/MYOG/CBFA2T3/PTH/PPP1CA/LEP/PPP1R3E	15
BP	GO:0043393	regulation of protein binding	15/1045	156/16266	0.0767205	0.481209	CDON/HDAC4/PSEN1/ZNF268/PDGFB/PRMT7/MEN1/DAB2IP/FLOT1/ARRB2/TCF7L2/NRG1/EPB41/B2M/AIDA	15
BP	GO:0051785	positive regulation of nuclear division	7/1045	58/16266	0.0769872	0.481209	IGF1/CAMK2B/PDGFB/UBE2B/DMRT1/NSMCE2/SH2B1	7
BP	GO:0009913	epidermal cell differentiation	17/1045	182/16266	0.0773566	0.481209	PAX6/PRKCH/SLC4A7/SPINK5/PPHLN1/REG3G/CERS3/KCNMA1/IVL/TMEM79/TMC1/DSG4/JAG2/PTCH1/KAZN/MYO6/LCE1B	17
BP	GO:0030879	mammary gland development	13/1045	131/16266	0.0781779	0.481209	IGF1/HOXA9/PTHLH/AREG/PRLR/RREB1/BCL2L11/NRG1/SOSTDC1/CSF1/PTCH1/DDR1/ETV5	13
BP	GO:0046683	response to organophosphorus	13/1045	131/16266	0.0781779	0.481209	CPS1/CREM/AREG/PDE4D/PTK2B/AKAP1/ASS1/CASP1/REN/DMTN/SFTPC/WNT10B/PDE2A	13
BP	GO:0090288	negative regulation of cellular response to growth factor stimulus	13/1045	131/16266	0.0781779	0.481209	FSTL3/DNM2/HRG/DAB2IP/SULF1/CASK/UBC/BMPER/SOST/LDLRAD4/SOSTDC1/PPP1CA/SMURF1	13
BP	GO:0007178	transmembrane receptor protein serine/threonine kinase signaling pathway	28/1045	329/16266	0.0782662	0.481209	FSTL3/ITGA8/DNM2/PDGFB/FOLR1/MAPK14/RUNX2/MEN1/DMRT1/SULF1/SLC39A5/ARRB2/SMAD4/ZEB1/UBC/PTPRK/PPM1L/BMPER/SOST/COL3A1/LDLRAD4/PTK2/SOSTDC1/PPP1CA/DSG4/MYH6/SMURF1/POU5F1	28
BP	GO:0010559	regulation of glycoprotein biosynthetic process	5/1045	36/16266	0.0783506	0.481209	IGF1/TMEM59/TCF7L2/PXYLP1/BACE2	5
BP	GO:0016056	rhodopsin mediated signaling pathway	5/1045	36/16266	0.0783506	0.481209	GUCA1A/GNAT1/CALM2/CALM3/CNGA1	5
BP	GO:0032885	regulation of polysaccharide biosynthetic process	5/1045	36/16266	0.0783506	0.481209	IGF1/PDGFB/PTH/PPP1CA/PPP1R3E	5
BP	GO:2000514	regulation of CD4-positive, alpha-beta T cell activation	5/1045	36/16266	0.0783506	0.481209	IFNG/CD80/XCL1/NLRP3/CD55	5
BP	GO:0017158	regulation of calcium ion-dependent exocytosis	6/1045	47/16266	0.0788399	0.481209	REST/SYT5/STXBP1/TMEM27/SCAMP5/DOC2B	6
BP	GO:0050879	multicellular organismal movement	6/1045	47/16266	0.0788399	0.481209	TNNT1/CHRNA1/TNNI1/STAC3/DMD/GIGYF2	6
BP	GO:0050881	musculoskeletal movement	6/1045	47/16266	0.0788399	0.481209	TNNT1/CHRNA1/TNNI1/STAC3/DMD/GIGYF2	6
BP	GO:0071320	cellular response to cAMP	6/1045	47/16266	0.0788399	0.481209	CPS1/PDE4D/AKAP1/ASS1/DMTN/WNT10B	6
BP	GO:0001711	endodermal cell fate commitment	3/1045	16/16266	0.0791389	0.481209	NANOG/EOMES/POU5F1	3
BP	GO:0002070	epithelial cell maturation	3/1045	16/16266	0.0791389	0.481209	RFX3/CDKN1A/TMEM79	3
BP	GO:0006590	thyroid hormone generation	3/1045	16/16266	0.0791389	0.481209	IYD/HPN/DIO3	3
BP	GO:0032692	negative regulation of interleukin-1 production	3/1045	16/16266	0.0791389	0.481209	ACP5/ARRB2/NLRP3	3
BP	GO:0032695	negative regulation of interleukin-12 production	3/1045	16/16266	0.0791389	0.481209	ACP5/C1QBP/ARRB2	3
BP	GO:0032891	negative regulation of organic acid transport	3/1045	16/16266	0.0791389	0.481209	LEP/CYP4F2/GRM7	3
BP	GO:0035584	calcium-mediated signaling using intracellular calcium source	3/1045	16/16266	0.0791389	0.481209	NTRK2/DMTN/SELP	3
BP	GO:0045026	plasma membrane fusion	3/1045	16/16266	0.0791389	0.481209	CD9/ROPN1B/NOX5	3
BP	GO:0045911	positive regulation of DNA recombination	3/1045	16/16266	0.0791389	0.481209	IFNG/UBE2B/TNFSF13	3
BP	GO:0046641	positive regulation of alpha-beta T cell proliferation	3/1045	16/16266	0.0791389	0.481209	CD80/XCL1/CD55	3
BP	GO:0060080	inhibitory postsynaptic potential	3/1045	16/16266	0.0791389	0.481209	RIMS1/RIMS2/BDNF	3
BP	GO:0071294	cellular response to zinc ion	3/1045	16/16266	0.0791389	0.481209	HVCN1/GRIN2A/ZNF658	3
BP	GO:0072576	liver morphogenesis	3/1045	16/16266	0.0791389	0.481209	HPN/IFNG/RPS6KA1	3
BP	GO:2000811	negative regulation of anoikis	3/1045	16/16266	0.0791389	0.481209	NTRK2/ITGB1/PTK2	3
BP	GO:0007043	cell-cell junction assembly	10/1045	94/16266	0.0791394	0.481209	CD9/PRKCH/CTNNA1/EPB41L3/TBCD/TLN2/GPBAR1/PKP3/GJA4/MYO1C	10
BP	GO:0042307	positive regulation of protein import into nucleus	10/1045	94/16266	0.0791394	0.481209	IGF1/ZNF268/KANK1/MAPK14/SEMA5A/SMAD4/EGFR/TLR3/LEP/POU5F1	10
BP	GO:0044264	cellular polysaccharide metabolic process	10/1045	94/16266	0.0791394	0.481209	IGF1/CPS1/HAS1/PRKAG2/UBC/PTH/CALM2/CALM3/PPP1CA/PPP1R3E	10
BP	GO:0042102	positive regulation of T cell proliferation	9/1045	82/16266	0.0795988	0.483374	IGF1/DHPS/CD276/IFNG/CD80/XCL1/TMIGD2/CD55/CARD11	9
BP	GO:0002263	cell activation involved in immune response	18/1045	196/16266	0.0802462	0.486045	PGLYRP1/RAB27A/PSEN1/IFNG/FOXP1/PTK2B/CD80/FER/ABR/TNFSF13/NLRP3/EOMES/AP1G1/FES/IFNA10/SEMA4A/PLCG2/IFNA4	18
BP	GO:0016051	carbohydrate biosynthetic process	18/1045	196/16266	0.0802462	0.486045	IGF1/NDST1/ENO1/PDGFB/HAS1/ENO3/PPARGC1A/CHST10/LEPR/PTK2B/ALDOA/UBC/PTH/LALBA/B3GALNT1/PPP1CA/LEP/PPP1R3E	18
BP	GO:0009582	detection of abiotic stimulus	17/1045	183/16266	0.0804409	0.486243	GUCA1A/PKD2L2/HPN/UNC119/APOC3/PITPNM1/GNAT1/STRA6/ARRB2/TRPM8/GNAQ/CALM2/CALM3/TMC1/EYS/BCO2/CNGA1	17
BP	GO:0023061	signal release	36/1045	440/16266	0.0804865	0.486243	NRXN3/SNCAIP/GAL/PFN2/CAMK2A/RIMS1/RFX3/PSEN1/REST/GNAS/NAPA/PDE4C/CPT1A/SLC1A2/IFNG/KCNC4/FFAR2/SYT5/UNC13A/PPFIA1/STXBP1/REN/STXBP5L/EPHA5/VIP/TMEM27/CASK/TCF7L2/SYT8/SLC6A1/SYN2/DGKI/BRSK2/LEP/RIMS2/DOC2B	36
BP	GO:0050863	regulation of T cell activation	24/1045	276/16266	0.0809444	0.486752	CD4/IGF1/AP3D1/DHPS/SOS2/CD276/IFNG/CD80/AP3B1/SPINK5/TESPA1/XCL1/ZEB1/SCGB1A1/TNFRSF14/NLRP3/TMIGD2/YES1/HLA-DQB1/LCK/CD55/IFNL3/CARD11/HLA-DRA	24
BP	GO:0016125	sterol metabolic process	13/1045	132/16266	0.0818905	0.486752	CYP46A1/MSMO1/LIPE/PRKAG2/MVK/SCAP/ACADL/LEPR/APOC1/OSBPL1A/LEP/RXRA/CELA3B	13
BP	GO:0001655	urogenital system development	27/1045	317/16266	0.0819608	0.486752	PROM1/IGF1/CD44/FSTL3/ITGA8/PDGFB/CTSH/EYA1/C1GALT1/PRLR/EPHA4/ASS1/SERPINF1/EPHB2/SULF1/STRA6/SMAD4/REN/BCL2L11/BMPER/GDNF/BDNF/BASP1/ROBO2/PTCH1/RXRA/CRIP1	27
BP	GO:0008299	isoprenoid biosynthetic process	4/1045	26/16266	0.0820794	0.486752	DHRS9/MVK/CYP1A1/ISPD	4
BP	GO:0010922	positive regulation of phosphatase activity	4/1045	26/16266	0.0820794	0.486752	IFNG/PPP2R4/CALM2/CALM3	4
BP	GO:0033173	calcineurin-NFAT signaling cascade	4/1045	26/16266	0.0820794	0.486752	IGF1/RCAN3/NFATC1/NRG1	4
BP	GO:0046320	regulation of fatty acid oxidation	4/1045	26/16266	0.0820794	0.486752	PRKAG2/PPARGC1A/CPT1A/ACADL	4
BP	GO:0048596	embryonic camera-type eye morphogenesis	4/1045	26/16266	0.0820794	0.486752	PAX6/STRA6/ZEB1/TH	4
BP	GO:0050820	positive regulation of coagulation	4/1045	26/16266	0.0820794	0.486752	PSEN1/CD36/DMTN/SELP	4
BP	GO:0051412	response to corticosterone	4/1045	26/16266	0.0820794	0.486752	CDKN1A/CALM2/CALM3/TH	4
BP	GO:0060314	regulation of ryanodine-sensitive calcium-release channel activity	4/1045	26/16266	0.0820794	0.486752	PDE4D/CALM2/CALM3/DMD	4
BP	GO:0060571	morphogenesis of an epithelial fold	4/1045	26/16266	0.0820794	0.486752	PTHLH/SULF1/EGFR/SOSTDC1	4
BP	GO:0072378	blood coagulation, fibrin clot formation	4/1045	26/16266	0.0820794	0.486752	C1QBP/F10/PRCP/GP1BB	4
BP	GO:1901522	positive regulation of transcription from RNA polymerase II promoter involved in cellular response to chemical stimulus	4/1045	26/16266	0.0820794	0.486752	RUNX2/CARF/SMAD4/RXRA	4
BP	GO:0045807	positive regulation of endocytosis	11/1045	107/16266	0.0821766	0.486752	RAB27A/DNM2/CD36/FLOT1/ARRB2/AHSG/MERTK/ABR/B2M/PROS1/PLCG2	11
BP	GO:0043010	camera-type eye development	25/1045	290/16266	0.0822342	0.486752	PROM1/PAX6/SLC4A7/CDON/PSEN1/ACHE/RPGRIP1/VSX1/CRYAB/GNAT1/FOXP2/SERPINF1/EPHB2/STRA6/CYP1A1/CNGA3/NTRK2/ZEB1/MERTK/RDH13/IFT122/TH/MAB21L2/RXRA/SLC4A5	25
BP	GO:0030858	positive regulation of epithelial cell differentiation	7/1045	59/16266	0.0827629	0.48806	PROM1/PAX6/PRKCH/RFX3/GDNF/WNT10B/PTCH1	7
BP	GO:0045682	regulation of epidermis development	7/1045	59/16266	0.0827629	0.48806	PRKCH/GAL/SMAD4/REG3G/TMEM79/WNT10B/PTCH1	7
BP	GO:0051648	vesicle localization	19/1045	210/16266	0.082786	0.48806	GRN/AP3D1/RAB27A/PFN2/DNM2/RIMS1/PSEN1/NAPA/SEC16B/COPA/SYT5/UNC13A/AP3B1/STXBP1/BBS4/SYT8/SAR1B/TH/DCTN1	19
BP	GO:0055001	muscle cell development	14/1045	145/16266	0.0829069	0.48806	IGF1/ATG5/HDAC4/POPDC2/MYOG/ITGB1/OBSCN/SORBS2/PI16/WNT10B/SMYD3/STAC3/MYH6/DMD	14
BP	GO:1901653	cellular response to peptide	40/1045	497/16266	0.0829765	0.48806	CPS1/CAMK2B/CAMK2A/GNAS/PDGFB/CSF2RB/ATP6V0A4/PRKAG2/KANK1/GNRHR/GAB1/GNB3/PRLR/AKAP1/ADCY7/ASS1/MEN1/DAB2IP/KSR1/AHSG/EGFR/IGFBP1/NCAM1/UBC/FER/NRG1/NRG2/CALM2/CALM3/GNG3/PTK2/LEP/YES1/LCK/GRIN2A/RXRA/MBD5/ATP6V1G2/CPEB1/STRADA	40
BP	GO:0002429	immune response-activating cell surface receptor signaling pathway	26/1045	304/16266	0.0833674	0.489744	CD4/PRKCH/FBXW11/PSEN1/FYB/PDE4D/FFAR2/NFATC1/TESPA1/CMTM3/FCGR2A/MYO10/UBC/ELMO1/CALM2/CALM3/PTK2/GCSAM/YES1/HLA-DQB1/LCK/PLA2G6/MYO1C/PLCG2/CARD11/HLA-DRA	26
BP	GO:0052652	cyclic purine nucleotide metabolic process	15/1045	158/16266	0.0834751	0.489763	GUCA1A/CALCRL/GNAS/PTHLH/AVP/PTK2B/ADCY7/VIP/NTRK2/PTH/CALM2/CALM3/OXER1/PDE2A/GRM7	15
BP	GO:0031532	actin cytoskeleton reorganization	9/1045	83/16266	0.0844664	0.494958	FRY/PTK2B/GMFG/HAX1/FER/EPS8/DMTN/BRSK2/FES	9
BP	GO:0014706	striated muscle tissue development	28/1045	332/16266	0.0852215	0.497343	IFRD1/ATG5/CDON/HDAC4/NDRG4/EYA1/MAPK14/PLAGL1/POPDC2/MYOG/FOXP2/FLOT1/CHRNA1/PRICKLE1/ITGB1/MBNL1/SORBS2/NRG1/TNNI1/EOMES/PI16/CTSB/WNT10B/NUPR1/BDNF/STAC3/RXRA/MYH6	28
BP	GO:0006953	acute-phase response	6/1045	48/16266	0.0854614	0.497343	ASS1/REG3G/AHSG/CD163/SIGIRR/SERPINA3	6
BP	GO:0006956	complement activation	6/1045	48/16266	0.0854614	0.497343	C1QBP/CFP/C1S/PROS1/CD55/CFI	6
BP	GO:0060042	retina morphogenesis in camera-type eye	6/1045	48/16266	0.0854614	0.497343	PROM1/SLC4A7/CDON/VSX1/CNGA3/RDH13	6
BP	GO:0071695	anatomical structure maturation	6/1045	48/16266	0.0854614	0.497343	IGF1/GAL/MMP2/SPINK5/WNT10B/LEP	6
BP	GO:0003009	skeletal muscle contraction	5/1045	37/16266	0.0860419	0.497343	TNNT1/CHRNA1/TNNI1/STAC3/DMD	5
BP	GO:0010761	fibroblast migration	5/1045	37/16266	0.0860419	0.497343	TNS1/HAS1/FER/DMTN/CYGB	5
BP	GO:0042491	auditory receptor cell differentiation	5/1045	37/16266	0.0860419	0.497343	SLC4A7/KCNMA1/TMC1/JAG2/MYO6	5
BP	GO:0045429	positive regulation of nitric oxide biosynthetic process	5/1045	37/16266	0.0860419	0.497343	DNM2/IFNG/ASS1/EGFR/NOS1AP	5
BP	GO:1904407	positive regulation of nitric oxide metabolic process	5/1045	37/16266	0.0860419	0.497343	DNM2/IFNG/ASS1/EGFR/NOS1AP	5
BP	GO:2000401	regulation of lymphocyte migration	5/1045	37/16266	0.0860419	0.497343	PADI2/PTK2B/XCL1/TNFRSF14/GCSAM	5
BP	GO:0014074	response to purine-containing compound	14/1045	146/16266	0.0865719	0.49979	CPS1/CREM/AREG/PDE4D/PTK2B/AKAP1/ASS1/CASP1/REN/SLC6A1/DMTN/SFTPC/WNT10B/PDE2A	14
BP	GO:0009190	cyclic nucleotide biosynthetic process	15/1045	159/16266	0.0869912	0.500351	GUCA1A/CALCRL/GNAS/PTHLH/AVP/PTK2B/ADCY7/VIP/NTRK2/PTH/CALM2/CALM3/OXER1/PDE2A/GRM7	15
BP	GO:0033044	regulation of chromosome organization	20/1045	225/16266	0.0879731	0.500351	ATG5/RNF4/CSNK2A1/RNF40/PPARGC1A/PADI2/UBE2B/NEK6/WBP2/SMAD4/TLK2/NSMCE2/PAXBP1/ANAPC10/NSD1/BUB1/PHF8/PARP10/POU5F1/TADA2A	20
BP	GO:0014020	primary neural tube formation	10/1045	96/16266	0.0882794	0.500351	FOLR1/LIAS/SHROOM3/PRICKLE1/BBS4/KDM6A/DVL3/IFT122/PTCH1/OPA1	10
BP	GO:1904591	positive regulation of protein import	10/1045	96/16266	0.0882794	0.500351	IGF1/ZNF268/KANK1/MAPK14/SEMA5A/SMAD4/EGFR/TLR3/LEP/POU5F1	10
BP	GO:0008203	cholesterol metabolic process	12/1045	121/16266	0.0884096	0.500351	CYP46A1/MSMO1/LIPE/MVK/SCAP/ACADL/LEPR/APOC1/OSBPL1A/LEP/RXRA/CELA3B	12
BP	GO:0002758	innate immune response-activating signal transduction	24/1045	279/16266	0.0887704	0.500351	PGLYRP1/MAP2K3/TNIP3/FBXW11/CACTIN/C1QBP/MAPK10/MAPK14/RPS6KA1/FFAR2/NFATC1/CD36/DAB2IP/FLOT1/ARRB2/REG3G/UBC/CALM2/CALM3/TLR3/CTSB/MYD88/PLCG2/CARD11	24
BP	GO:0035710	CD4-positive, alpha-beta T cell activation	7/1045	60/16266	0.0887806	0.500351	IFNG/FOXP1/CD80/XCL1/NLRP3/SEMA4A/CD55	7
BP	GO:0019217	regulation of fatty acid metabolic process	9/1045	84/16266	0.0895083	0.500351	MLXIPL/AVP/PRKAG2/PPARGC1A/CPT1A/APOC3/SCAP/ACADL/APOC1	9
BP	GO:0048144	fibroblast proliferation	9/1045	84/16266	0.0895083	0.500351	IGF1/PDGFB/CDKN1A/DAB2IP/EGFR/SP2/NUPR1/PARP10/CTC1	9
BP	GO:0051705	multi-organism behavior	9/1045	84/16266	0.0895083	0.500351	NRXN3/GRN/AVP/BBS4/UBR3/NPAS3/GNAQ/SHANK2/TH	9
BP	GO:0031348	negative regulation of defense response	13/1045	134/16266	0.0896461	0.500351	PGLYRP1/CALCRL/ACP5/CD276/CACTIN/C1QBP/MVK/SERPINF1/TARBP2/ARRB2/ABR/NLRP3/PCBP2	13
BP	GO:0030301	cholesterol transport	8/1045	72/16266	0.0898446	0.500351	MSR1/LIPG/APOC3/SCP2/APOC1/CD36/LEP/PTCH1	8
BP	GO:0040014	regulation of multicellular organism growth	8/1045	72/16266	0.0898446	0.500351	IGF1/GNAS/BBS4/CSF1/PTCH1/DIO3/MBD5/ATXN2	8
BP	GO:0051047	positive regulation of secretion	28/1045	334/16266	0.090083	0.500351	IGF1/ATG5/GAL/RAB27A/ACHE/AVP/CD276/IFNG/MAPK14/TRIM6/FFAR2/UNC13A/STXBP1/CASP1/IFNAR1/RHBDD1/STXBP5L/TMEM27/TCF7L2/SLC6A1/TNFRSF14/NLRP3/AP1G1/GDNF/LEP/CYP4F2/SCAMP5/DOC2B	28
BP	GO:0042445	hormone metabolic process	17/1045	186/16266	0.0901717	0.500351	IYD/GAL/DHRS9/REST/HPN/PPARGC1A/SCP2/STRA6/CYP1A1/REN/TCF7L2/KCNMA1/LEP/BACE2/DIO3/BCO2/ADH4	17
BP	GO:0050851	antigen receptor-mediated signaling pathway	14/1045	147/16266	0.0903378	0.500351	CD4/PRKCH/PSEN1/FYB/PDE4D/TESPA1/CMTM3/UBC/GCSAM/HLA-DQB1/LCK/PLCG2/CARD11/HLA-DRA	14
BP	GO:0030801	positive regulation of cyclic nucleotide metabolic process	11/1045	109/16266	0.090908	0.500351	GUCA1A/CALCRL/GNAS/PTHLH/AVP/ADCY7/VIP/NTRK2/PTH/CALM2/CALM3	11
BP	GO:0008544	epidermis development	26/1045	307/16266	0.0909592	0.500351	PAX6/PRKCH/SLC4A7/GAL/GNAS/PTHLH/GAB1/SPINK5/PPHLN1/GRHL1/SMAD4/REG3G/EGFR/CERS3/KCNMA1/IVL/TMEM79/TMC1/WNT10B/SOSTDC1/DSG4/JAG2/PTCH1/KAZN/MYO6/LCE1B	26
BP	GO:0001963	synaptic transmission, dopaminergic	4/1045	27/16266	0.091689	0.500351	FLOT1/ARRB2/GDNF/TH	4
BP	GO:0006735	NADH regeneration	4/1045	27/16266	0.091689	0.500351	ENO1/ENO3/ALDOA/HK1	4
BP	GO:0006829	zinc II ion transport	4/1045	27/16266	0.091689	0.500351	SLC39A14/SLC11A2/SLC30A3/SLC39A5	4
BP	GO:0010656	negative regulation of muscle cell apoptotic process	4/1045	27/16266	0.091689	0.500351	IGF1/PTK2B/ARRB2/NRG1	4
BP	GO:0010762	regulation of fibroblast migration	4/1045	27/16266	0.091689	0.500351	HAS1/FER/DMTN/CYGB	4
BP	GO:0032731	positive regulation of interleukin-1 beta production	4/1045	27/16266	0.091689	0.500351	IFNG/CASP1/IFNAR1/NLRP3	4
BP	GO:0046633	alpha-beta T cell proliferation	4/1045	27/16266	0.091689	0.500351	CD80/XCL1/TNFRSF14/CD55	4
BP	GO:0061615	glycolytic process through fructose-6-phosphate	4/1045	27/16266	0.091689	0.500351	ENO1/ENO3/ALDOA/HK1	4
BP	GO:0061620	glycolytic process through glucose-6-phosphate	4/1045	27/16266	0.091689	0.500351	ENO1/ENO3/ALDOA/HK1	4
BP	GO:0061621	canonical glycolysis	4/1045	27/16266	0.091689	0.500351	ENO1/ENO3/ALDOA/HK1	4
BP	GO:0061718	glucose catabolic process to pyruvate	4/1045	27/16266	0.091689	0.500351	ENO1/ENO3/ALDOA/HK1	4
BP	GO:0098657	import into cell	4/1045	27/16266	0.091689	0.500351	SLC7A2/PICALM/SLC11A2/B2M	4
BP	GO:0006577	amino-acid betaine metabolic process	3/1045	17/16266	0.0916919	0.500351	CPT1A/ACADL/ACADM	3
BP	GO:0010224	response to UV-B	3/1045	17/16266	0.0916919	0.500351	CDKN1A/IVL/CRIP1	3
BP	GO:0010560	positive regulation of glycoprotein biosynthetic process	3/1045	17/16266	0.0916919	0.500351	IGF1/TCF7L2/PXYLP1	3
BP	GO:0015697	quaternary ammonium group transport	3/1045	17/16266	0.0916919	0.500351	PRKAG2/CPT1A/CPT1B	3
BP	GO:0032225	regulation of synaptic transmission, dopaminergic	3/1045	17/16266	0.0916919	0.500351	FLOT1/ARRB2/GDNF	3
BP	GO:0032373	positive regulation of sterol transport	3/1045	17/16266	0.0916919	0.500351	LIPG/SCP2/PTCH1	3
BP	GO:0032376	positive regulation of cholesterol transport	3/1045	17/16266	0.0916919	0.500351	LIPG/SCP2/PTCH1	3
BP	GO:0032703	negative regulation of interleukin-2 production	3/1045	17/16266	0.0916919	0.500351	CD276/XCL1/KAT5	3
BP	GO:0050687	negative regulation of defense response to virus	3/1045	17/16266	0.0916919	0.500351	C1QBP/TARBP2/PCBP2	3
BP	GO:0060219	camera-type eye photoreceptor cell differentiation	3/1045	17/16266	0.0916919	0.500351	PROM1/SLC4A7/CNGA3	3
BP	GO:0060572	morphogenesis of an epithelial bud	3/1045	17/16266	0.0916919	0.500351	PTHLH/SULF1/SOSTDC1	3
BP	GO:0060575	intestinal epithelial cell differentiation	3/1045	17/16266	0.0916919	0.500351	C1GALT1/CDKN1A/YIPF6	3
BP	GO:0060749	mammary gland alveolus development	3/1045	17/16266	0.0916919	0.500351	AREG/PRLR/DDR1	3
BP	GO:0061377	mammary gland lobule development	3/1045	17/16266	0.0916919	0.500351	AREG/PRLR/DDR1	3
BP	GO:1902170	cellular response to reactive nitrogen species	3/1045	17/16266	0.0916919	0.500351	DNM2/PPARGC1A/SFTPC	3
BP	GO:1903779	regulation of cardiac conduction	3/1045	17/16266	0.0916919	0.500351	PDE4D/CALM2/CALM3	3
BP	GO:2000300	regulation of synaptic vesicle exocytosis	3/1045	17/16266	0.0916919	0.500351	PFN2/NAPA/STXBP1	3
BP	GO:0048871	multicellular organismal homeostasis	27/1045	321/16266	0.0918343	0.500545	PROM1/MLXIPL/IL20RA/SPATA7/GNAS/PTHLH/AVP/ACP5/CTSH/CDH23/PPARGC1A/SLC11A2/ACADL/PTK2B/ADCY7/PRCP/BBS4/PTH/TMEM79/ADGRV1/B2M/ANKRD11/NXNL1/CSF1/CYP4F2/SERPINA3/GIGYF2	27
BP	GO:0030042	actin filament depolymerization	6/1045	49/16266	0.0923793	0.502346	SEMA5A/MICAL2/EPS8/DMTN/CAPZA2/MICAL3	6
BP	GO:0033762	response to glucagon	6/1045	49/16266	0.0923793	0.502346	CPS1/GNAS/GNB3/ADCY7/ASS1/GNG3	6
BP	GO:0017038	protein import	25/1045	294/16266	0.0926155	0.502388	IGF1/FBXW11/FYB/GCKR/ZNF268/TIMM50/KANK1/IFNG/MAPK14/MDFI/SEMA5A/AKAP1/CDKN1A/CD36/DAB2IP/PRICKLE1/SMAD4/EGFR/GNAQ/NLRP3/TLR3/LEP/PARP10/PDE2A/POU5F1	25
BP	GO:0051896	regulation of protein kinase B signaling	12/1045	122/16266	0.0926418	0.502388	IGF1/THPO/C1QBP/SEMA5A/F10/ARRB2/HAX1/EGFR/NTRK2/TCF7L2/NRG1/PTK2	12
BP	GO:0048608	reproductive structure development	34/1045	418/16266	0.0927089	0.502388	IGF1/CD44/CTNNA1/ZFAT/FSTL3/HOXA9/PDGFB/GAB1/MAPK14/MDFI/PRLR/ESX1/TOX2/SERPINF1/NASP/MEN1/DMRT1/SULF1/STRA6/ARRB2/REN/EGFR/BCL2L11/MERTK/EOMES/CTSB/PTK2/UTF1/LEP/NUPR1/BASP1/ROBO2/RXRA/CRIP1	34
BP	GO:0045165	cell fate commitment	23/1045	267/16266	0.0930006	0.503386	IFRD1/PAX6/CDON/PSEN1/EYA1/POU6F2/LHX6/NANOG/DOCK7/MYOG/RUNX2/SMAD4/TCF7L2/ITGB1/NRG1/EOMES/GDNF/WNT10B/SOSTDC1/JAG2/PTCH1/POU5F1/EBF2	23
BP	GO:0000380	alternative mRNA splicing, via spliceosome	5/1045	38/16266	0.0941128	0.504883	PQBP1/SRRM4/CELF6/MBNL1/RBMY1A1	5
BP	GO:0008088	axon cargo transport	5/1045	38/16266	0.0941128	0.504883	AP3D1/KLC1/AP3B1/SPG7/OPA1	5
BP	GO:0008347	glial cell migration	5/1045	38/16266	0.0941128	0.504883	EPHA4/DAB2IP/C16orf45/CSF1/ADGRG1	5
BP	GO:0046638	positive regulation of alpha-beta T cell differentiation	5/1045	38/16266	0.0941128	0.504883	AP3D1/IFNG/CD80/AP3B1/NLRP3	5
BP	GO:0042391	regulation of membrane potential	31/1045	377/16266	0.0941735	0.504883	ABCB5/NDUFS1/RIMS1/PSEN1/IFNG/PTK2B/POPDC2/KCNK15/SCN2A/CASP1/CHRNA1/CNGA3/SLC26A7/ANK3/SCN3A/GNAQ/KCNMA1/DGKI/B2M/PXK/RIMS2/BDNF/GRIN2A/SCN5A/HTR3E/TPCN1/BCO2/CNGA1/NOS1AP/DMD/FXYD1	31
BP	GO:0043491	protein kinase B signaling	14/1045	148/16266	0.0942048	0.504883	IGF1/THPO/C1QBP/SEMA5A/F10/PIK3C2B/ARRB2/HAX1/EGFR/NTRK2/TCF7L2/MERTK/NRG1/PTK2	14
BP	GO:0001942	hair follicle development	9/1045	85/16266	0.0947243	0.504883	GAL/GNAS/SPINK5/SMAD4/EGFR/TMEM79/WNT10B/SOSTDC1/DSG4	9
BP	GO:0022404	molting cycle process	9/1045	85/16266	0.0947243	0.504883	GAL/GNAS/SPINK5/SMAD4/EGFR/TMEM79/WNT10B/SOSTDC1/DSG4	9
BP	GO:0022405	hair cycle process	9/1045	85/16266	0.0947243	0.504883	GAL/GNAS/SPINK5/SMAD4/EGFR/TMEM79/WNT10B/SOSTDC1/DSG4	9
BP	GO:0048732	gland development	34/1045	419/16266	0.0949804	0.504883	PAX6/IGF1/CPS1/CD44/FSTL3/POLB/HOXA9/PSEN1/PTHLH/PRMT5/HPN/AREG/IFNG/PRLR/RPS6KA1/RREB1/ASS1/SERPINF1/SULF1/STRA6/CYP1A1/SMAD4/EGFR/BCL2L11/CAST/NRG1/SOSTDC1/CTC1/CSF1/PTCH1/RXRA/DDR1/CRIP1/ETV5	34
BP	GO:0015807	L-amino acid transport	7/1045	61/16266	0.0950387	0.504883	SLC7A2/PSEN1/SLC1A2/SLC3A1/SLC7A7/SEPT2/SERINC2	7
BP	GO:0019674	NAD metabolic process	7/1045	61/16266	0.0950387	0.504883	NADK/ENO1/ENO3/ALDOA/HK1/NMNAT3/ASPDH	7
BP	GO:0032612	interleukin-1 production	7/1045	61/16266	0.0950387	0.504883	ACP5/IFNG/FOXP1/CASP1/ARRB2/IFNAR1/NLRP3	7
BP	GO:0071774	response to fibroblast growth factor	28/1045	336/16266	0.0951261	0.504883	CPS1/CD44/CAMK2B/NDST1/CAMK2A/KIF16B/PDGFB/CSF2RB/GAB1/ADCY7/CD80/CDKN1A/RUNX2/DAB2IP/SULF1/KSR1/EGFR/SCGB1A1/NCAM1/UBC/PTH/NRG1/NRG2/CALM2/CALM3/PTK2/LCK/GRIN2A	28
BP	GO:0070482	response to oxygen levels	25/1045	295/16266	0.0953396	0.504883	POLB/MMP2/PDGFB/PPARGC1A/CRYAB/SLC11A2/SCAP/PTK2B/CDKN1A/AJUBA/CBFA2T3/CASP1/CYP1A1/SMAD4/HYOU1/UBC/KCNMA1/CYGB/SFTPC/LEP/BDNF/TH/MDM4/CPEB1/HMBS	25
BP	GO:0045580	regulation of T cell differentiation	11/1045	110/16266	0.0954768	0.504883	AP3D1/SOS2/IFNG/CD80/AP3B1/SPINK5/TESPA1/ZEB1/NLRP3/LCK/CARD11	11
BP	GO:0046824	positive regulation of nucleocytoplasmic transport	11/1045	110/16266	0.0954768	0.504883	IGF1/ZNF268/KANK1/MAPK14/SEMA5A/SMAD4/EGFR/TCF7L2/TLR3/LEP/POU5F1	11
BP	GO:0002433	immune response-regulating cell surface receptor signaling pathway involved in phagocytosis	8/1045	73/16266	0.0955416	0.504883	FCGR2A/MYO10/ELMO1/PTK2/YES1/PLA2G6/MYO1C/PLCG2	8
BP	GO:0015837	amine transport	8/1045	73/16266	0.0955416	0.504883	AVP/TMEM27/SLC6A1/SEPT2/GDNF/LEP/TH/GRM7	8
BP	GO:0015918	sterol transport	8/1045	73/16266	0.0955416	0.504883	MSR1/LIPG/APOC3/SCP2/APOC1/CD36/LEP/PTCH1	8
BP	GO:0038096	Fc-gamma receptor signaling pathway involved in phagocytosis	8/1045	73/16266	0.0955416	0.504883	FCGR2A/MYO10/ELMO1/PTK2/YES1/PLA2G6/MYO1C/PLCG2	8
BP	GO:0009141	nucleoside triphosphate metabolic process	21/1045	241/16266	0.095893	0.506168	NADK/MLXIPL/IGF1/NDUFS1/HDAC4/ENO1/COQ9/ATP6V0A4/PRKAG2/ENO3/PPARGC1A/MYOG/CBFA2T3/COX4I1/FIGNL1/CMPK2/ALDOA/HK1/NDUFV1/BDNF/MYH6	21
BP	GO:0001894	tissue homeostasis	18/1045	201/16266	0.096216	0.507301	PROM1/IL20RA/SPATA7/GNAS/PTHLH/ACP5/CTSH/CDH23/PTK2B/BBS4/PTH/ADGRV1/B2M/ANKRD11/NXNL1/CSF1/SERPINA3/GIGYF2	18
BP	GO:0050688	regulation of defense response to virus	17/1045	188/16266	0.0970601	0.511176	CD4/AP1B1/PNPO/C1QBP/FANCL/TRIM6/TARBP2/SNTG1/ELMO1/B2M/AP1G1/PHYHIP/AP1S2/LCK/PCBP2/SMURF1/MBD5	17
BP	GO:0030833	regulation of actin filament polymerization	13/1045	136/16266	0.0978436	0.51442	PFN2/KANK1/PTK2B/GMFG/ACTR3B/SPIRE1/BBS4/HAX1/FER/EPS8/DMTN/FAM21C/CAPZA2	13
BP	GO:0032609	interferon-gamma production	10/1045	98/16266	0.0980292	0.51442	PGLYRP1/CD276/C1QBP/PDE4D/IFNAR1/XCL1/SCGB1A1/EOMES/TLR3/BTN3A2	10
BP	GO:0008154	actin polymerization or depolymerization	15/1045	162/16266	0.0980979	0.51442	GAS7/PFN2/KANK1/SEMA5A/PTK2B/ACTR3B/MICAL2/SPIRE1/BBS4/HAX1/FER/EPS8/DMTN/CAPZA2/MICAL3	15
BP	GO:0006869	lipid transport	25/1045	296/16266	0.0981156	0.51442	MSR1/GAL/SLC27A5/SLCO1A2/LIPG/PRKAG2/CPT1A/APOC3/PITPNM1/SCP2/APOC1/CD36/SLCO2B1/STRA6/PRELID3A/OSBPL1A/REN/ABCA9/LEP/OSBP2/PTCH1/CYP4F2/RXRA/CPT1B/STARD10	25
BP	GO:0002292	T cell differentiation involved in immune response	6/1045	50/16266	0.0995897	0.520982	IFNG/FOXP1/CD80/NLRP3/EOMES/SEMA4A	6
BP	GO:0008206	bile acid metabolic process	6/1045	50/16266	0.0995897	0.520982	CYP46A1/SLC27A5/SLCO1A2/SCP2/LEP/RXRA	6
BP	GO:0038095	Fc-epsilon receptor signaling pathway	25/1045	297/16266	0.100944	0.524769	CAMK2B/CAMK2A/FBXW11/PDGFB/CSF2RB/MAPK10/GAB1/CD80/CDKN1A/NFATC1/DAB2IP/KSR1/EGFR/NCAM1/UBC/FER/NRG1/NRG2/CALM2/CALM3/PTK2/LCK/GRIN2A/PLCG2/CARD11	25
BP	GO:0000271	polysaccharide biosynthetic process	8/1045	74/16266	0.101439	0.524769	IGF1/NDST1/PDGFB/HAS1/UBC/PTH/PPP1CA/PPP1R3E	8
BP	GO:0051963	regulation of synapse assembly	8/1045	74/16266	0.101439	0.524769	NRXN3/SRPX2/EPHB2/NTRK2/PTK2/BDNF/ROBO2/SLITRK2	8
BP	GO:1902652	secondary alcohol metabolic process	12/1045	124/16266	0.101471	0.524769	CYP46A1/MSMO1/LIPE/MVK/SCAP/ACADL/LEPR/APOC1/OSBPL1A/LEP/RXRA/CELA3B	12
BP	GO:0060419	heart growth	7/1045	62/16266	0.101535	0.524769	NDRG4/MAPK14/SORBS2/NRG1/PI16/BASP1/MYH6	7
BP	GO:0051656	establishment of organelle localization	26/1045	311/16266	0.101774	0.524769	PAX6/GRN/MAP4/AP3D1/RAB27A/PFN2/DNM2/RIMS1/PSEN1/EYA1/NAPA/SEC16B/COPA/SYT5/UNC13A/SYNE1/AP3B1/DCTN4/SPIRE1/STXBP1/BBS4/SYT8/SAR1B/PTK2/TH/DCTN1	26
BP	GO:0010743	regulation of macrophage derived foam cell differentiation	4/1045	28/16266	0.101807	0.524769	PRKCH/MSR1/CD36/CSF1	4
BP	GO:0032728	positive regulation of interferon-beta production	4/1045	28/16266	0.101807	0.524769	FLOT1/IFNAR1/TLR3/ZBTB20	4
BP	GO:0035066	positive regulation of histone acetylation	4/1045	28/16266	0.101807	0.524769	PPARGC1A/WBP2/SMAD4/TADA2A	4
BP	GO:0051954	positive regulation of amine transport	4/1045	28/16266	0.101807	0.524769	AVP/TMEM27/SLC6A1/GDNF	4
BP	GO:0071870	cellular response to catecholamine stimulus	4/1045	28/16266	0.101807	0.524769	DNM2/GNAS/PDE4D/BDNF	4
BP	GO:1900026	positive regulation of substrate adhesion-dependent cell spreading	4/1045	28/16266	0.101807	0.524769	DNM2/C1QBP/RREB1/DMTN	4
BP	GO:0061458	reproductive system development	34/1045	422/16266	0.102017	0.524769	IGF1/CD44/CTNNA1/ZFAT/FSTL3/HOXA9/PDGFB/GAB1/MAPK14/MDFI/PRLR/ESX1/TOX2/SERPINF1/NASP/MEN1/DMRT1/SULF1/STRA6/ARRB2/REN/EGFR/BCL2L11/MERTK/EOMES/CTSB/PTK2/UTF1/LEP/NUPR1/BASP1/ROBO2/RXRA/CRIP1	34
BP	GO:0051146	striated muscle cell differentiation	21/1045	243/16266	0.102155	0.524769	IGF1/ATG5/CDON/HDAC4/MAPK14/POPDC2/MYOG/FLOT1/PRICKLE1/ITGB1/CAST/OBSCN/SORBS2/NRG1/PI16/WNT10B/SMYD3/STAC3/RXRA/MYH6/DMD	21
BP	GO:0007271	synaptic transmission, cholinergic	5/1045	39/16266	0.102555	0.524769	CAMK2B/ACHE/IFNG/CHRNA1/RIC3	5
BP	GO:0030049	muscle filament sliding	5/1045	39/16266	0.102555	0.524769	TNNT1/TNNI1/TPM4/MYH6/DMD	5
BP	GO:0033275	actin-myosin filament sliding	5/1045	39/16266	0.102555	0.524769	TNNT1/TNNI1/TPM4/MYH6/DMD	5
BP	GO:0046461	neutral lipid catabolic process	5/1045	39/16266	0.102555	0.524769	CPS1/MGLL/LIPE/APOC3/PPP1CA	5
BP	GO:0046464	acylglycerol catabolic process	5/1045	39/16266	0.102555	0.524769	CPS1/MGLL/LIPE/APOC3/PPP1CA	5
BP	GO:0050854	regulation of antigen receptor-mediated signaling pathway	5/1045	39/16266	0.102555	0.524769	PRKCH/TESPA1/CMTM3/GCSAM/LCK	5
BP	GO:0071482	cellular response to light stimulus	10/1045	99/16266	0.103132	0.526568	GUCA1A/GNAT1/CDKN1A/RHBDD1/PTPRK/CALM2/CALM3/DDIAS/CNGA1/CRIP1	10
BP	GO:0090317	negative regulation of intracellular protein transport	10/1045	99/16266	0.103132	0.526568	FBXW11/ZNF268/MDFI/AKAP1/CD36/DAB2IP/DMTN/NLRP3/PARP10/PDE2A	10
BP	GO:0002009	morphogenesis of an epithelium	37/1045	465/16266	0.1042	0.527013	IGF1/CD44/PSEN1/PTHLH/NDRG4/CTSH/EYA1/AREG/FOLR1/SEMA5A/FOXP1/EPHA4/LIAS/RREB1/AJUBA/MICAL2/MYCN/SULF1/SHROOM3/PRICKLE1/BBS4/SMAD4/EGFR/KDM6A/DVL3/TMEM79/IFT122/GDNF/SOSTDC1/PPP1CA/CSF1/JAG2/PTCH1/RXRA/OPA1/DDR1/ETV5	37
BP	GO:0001829	trophectodermal cell differentiation	3/1045	18/16266	0.105006	0.527013	CNOT2/ESRRB/EOMES	3
BP	GO:0001919	regulation of receptor recycling	3/1045	18/16266	0.105006	0.527013	PSEN1/ACHE/KIF16B	3
BP	GO:0006198	cAMP catabolic process	3/1045	18/16266	0.105006	0.527013	PDE4C/PDE4D/PDE2A	3
BP	GO:0019359	nicotinamide nucleotide biosynthetic process	3/1045	18/16266	0.105006	0.527013	NADK/NMNAT3/ASPDH	3
BP	GO:0019363	pyridine nucleotide biosynthetic process	3/1045	18/16266	0.105006	0.527013	NADK/NMNAT3/ASPDH	3
BP	GO:0032958	inositol phosphate biosynthetic process	3/1045	18/16266	0.105006	0.527013	SCP2/PTK2B/PLCG2	3
BP	GO:0035357	peroxisome proliferator activated receptor signaling pathway	3/1045	18/16266	0.105006	0.527013	LEP/RXRA/STARD10	3
BP	GO:0042219	cellular modified amino acid catabolic process	3/1045	18/16266	0.105006	0.527013	GGT1/PRODH/DIO3	3
BP	GO:0048486	parasympathetic nervous system development	3/1045	18/16266	0.105006	0.527013	HOXB1/GDNF/PLXNA4	3
BP	GO:0060037	pharyngeal system development	3/1045	18/16266	0.105006	0.527013	EYA1/FOLR1/PTCH1	3
BP	GO:0070884	regulation of calcineurin-NFAT signaling cascade	3/1045	18/16266	0.105006	0.527013	IGF1/RCAN3/NRG1	3
BP	GO:1901741	positive regulation of myoblast fusion	3/1045	18/16266	0.105006	0.527013	MAPK14/MYOG/FLOT1	3
BP	GO:2000463	positive regulation of excitatory postsynaptic potential	3/1045	18/16266	0.105006	0.527013	RIMS1/PTK2B/RIMS2	3
BP	GO:2000725	regulation of cardiac muscle cell differentiation	3/1045	18/16266	0.105006	0.527013	PRICKLE1/NRG1/PI16	3
BP	GO:0007602	phototransduction	11/1045	112/16266	0.10502	0.527013	GUCA1A/UNC119/APOC3/PITPNM1/GNAT1/STRA6/GNAQ/CALM2/CALM3/BCO2/CNGA1	11
BP	GO:0030278	regulation of ossification	16/1045	177/16266	0.105234	0.52752	IGF1/HDAC4/GNAS/CD276/AREG/PTK2B/RUNX2/MEN1/AHSG/PTH/SOST/PTK2/WNT10B/CSF1/PTCH1/SMURF1	16
BP	GO:0098773	skin epidermis development	9/1045	87/16266	0.105675	0.529165	GAL/GNAS/SPINK5/SMAD4/EGFR/TMEM79/WNT10B/SOSTDC1/DSG4	9
BP	GO:0032271	regulation of protein polymerization	15/1045	164/16266	0.105969	0.529812	PFN2/KANK1/PTK2B/GMFG/ACTR3B/SPIRE1/BBS4/TBCD/HAX1/FER/EPS8/DMTN/FAM21C/FES/CAPZA2	15
BP	GO:0009583	detection of light stimulus	12/1045	125/16266	0.106068	0.529812	GUCA1A/UNC119/APOC3/PITPNM1/GNAT1/STRA6/GNAQ/CALM2/CALM3/EYS/BCO2/CNGA1	12
BP	GO:0009566	fertilization	14/1045	151/16266	0.106413	0.529812	CD9/CAMK2B/HOXA9/CATSPERG/GNPDA1/ROPN1B/SLIRP/HVCN1/TARBP2/SYT8/CAST/CDK1/WEE2/NOX5	14
BP	GO:1903035	negative regulation of response to wounding	14/1045	151/16266	0.106413	0.529812	PGLYRP1/CALCRL/PDGFB/ACP5/CD276/MVK/HRG/EPHA4/SERPINF1/ADAMTS18/CASK/ABR/NLRP3/PROS1	14
BP	GO:0006665	sphingolipid metabolic process	13/1045	138/16266	0.106483	0.529812	AGK/CREM/ASAH1/ST3GAL3/SMPD4/CERS5/CERS3/PPM1L/ARSK/SERINC2/TH/SPTSSB/NEU4	13
BP	GO:0043433	negative regulation of sequence-specific DNA binding transcription factor activity	13/1045	138/16266	0.106483	0.529812	HDAC4/PTHLH/CACTIN/SPOP/MEN1/DAB2IP/ARRB2/XCL1/TCF7L2/NLRP3/PARP10/SIGIRR/PTCH1	13
BP	GO:0042180	cellular ketone metabolic process	22/1045	258/16266	0.106767	0.530567	MLXIPL/DHRS9/REST/COQ9/AVP/HPN/PRKAG2/PPARGC1A/CPT1A/APOC3/SCAP/ACADL/SCP2/LEPR/APOC1/SLC7A7/KCNMA1/LEP/CYP4F2/CYP2B6/ADH4/CRYZL1	22
BP	GO:0003407	neural retina development	6/1045	51/16266	0.107088	0.530567	PROM1/SLC4A7/PSEN1/VSX1/CNGA3/RDH13	6
BP	GO:0046456	icosanoid biosynthetic process	6/1045	51/16266	0.107088	0.530567	GGT1/GGTLC2/GGTLC1/GGT2/AVP/PTGDS	6
BP	GO:1901570	fatty acid derivative biosynthetic process	6/1045	51/16266	0.107088	0.530567	GGT1/GGTLC2/GGTLC1/GGT2/AVP/PTGDS	6
BP	GO:0016485	protein processing	26/1045	313/16266	0.10748	0.531662	PSEN1/PTHLH/BCL2L13/GGT1/CTSH/HPN/C1QBP/SLC11A2/TMEM59/CFP/CASP1/REN/RHBDD1/UBC/BCL2L11/ADAMTS13/NLRP3/TLR3/FKRP/BACE2/LCK/PROS1/PTCH1/CD55/CFI/NAIP	26
BP	GO:0072676	lymphocyte migration	8/1045	75/16266	0.107536	0.531662	CCL22/PADI2/PTK2B/ITGB7/XCL1/TNFRSF14/GCSAM/CCL14	8
BP	GO:0042490	mechanoreceptor differentiation	7/1045	63/16266	0.108266	0.533582	SLC4A7/NTRK2/KCNMA1/TMC1/BDNF/JAG2/MYO6	7
BP	GO:0050764	regulation of phagocytosis	7/1045	63/16266	0.108266	0.533582	RAB27A/DNM2/CD36/AHSG/MERTK/ABR/PROS1	7
BP	GO:1900543	negative regulation of purine nucleotide metabolic process	7/1045	63/16266	0.108266	0.533582	MLXIPL/HDAC4/PPARGC1A/MYOG/CBFA2T3/PDE2A/GRM7	7
BP	GO:0097306	cellular response to alcohol	10/1045	100/16266	0.108385	0.533607	CTNNA1/ADCY7/MYOG/ASS1/SERPINF1/EGFR/KAT5/SMYD3/PTCH1/HMBS	10
BP	GO:0002218	activation of innate immune response	24/1045	286/16266	0.108924	0.535695	PGLYRP1/MAP2K3/TNIP3/FBXW11/CACTIN/C1QBP/MAPK10/MAPK14/RPS6KA1/FFAR2/NFATC1/CD36/DAB2IP/FLOT1/ARRB2/REG3G/UBC/CALM2/CALM3/TLR3/CTSB/MYD88/PLCG2/CARD11	24
BP	GO:0008015	blood circulation	34/1045	425/16266	0.109388	0.537411	CPS1/MAP2K3/ELN/ATG5/HDAC4/TRHDE/PDGFB/AVP/IFNG/GNB3/PDE4D/POPDC2/PRCP/BBS4/REN/VIP/KCNMA1/EPB41/TNNI1/ABR/CALM2/CALM3/LEP/YES1/TH/SCN5A/CYP4F2/PDE2A/SLC4A5/MYH6/ADH5/NOS1AP/DMD/FXYD1	34
BP	GO:0051098	regulation of binding	22/1045	259/16266	0.10999	0.538705	IGF1/CDON/HDAC4/PSEN1/ZNF268/CYP2D6/PDGFB/MDFI/TRIM6/PRMT7/MEN1/DAB2IP/FLOT1/ARRB2/SMAD4/TCF7L2/NRG1/EPB41/NSD1/B2M/AIDA/EBF2	22
BP	GO:0007286	spermatid development	11/1045	113/16266	0.109993	0.538705	SMARCA2/SEPT4/DDX25/UBE2B/SLIRP/TARBP2/BBS4/ZMYND15/DDIAS/PDILT/OSBP2	11
BP	GO:0050663	cytokine secretion	14/1045	152/16266	0.110684	0.538705	ATG5/CD276/IFNG/MAPK14/FOXP1/TRIM6/FFAR2/CASP1/IFNAR1/TNFRSF14/NLRP3/BTN3A2/SCAMP5/NOX5	14
BP	GO:0010623	developmental programmed cell death	5/1045	40/16266	0.111359	0.538705	SLC4A7/CRYAB/BCL2L11/BDNF/JAG2	5
BP	GO:0031343	positive regulation of cell killing	5/1045	40/16266	0.111359	0.538705	IFNG/XCL1/BCL2L11/B2M/AP1G1	5
BP	GO:0042551	neuron maturation	5/1045	40/16266	0.111359	0.538705	NRCAM/VSX1/GNAQ/GLDN/OPA1	5
BP	GO:1903305	regulation of regulated secretory pathway	5/1045	40/16266	0.111359	0.538705	RAB27A/FER/ABR/AP1G1/FES	5
BP	GO:2000242	negative regulation of reproductive process	5/1045	40/16266	0.111359	0.538705	IGF1/PTGDS/SERPINF1/SULF1/WEE2	5
BP	GO:0001708	cell fate specification	9/1045	88/16266	0.111407	0.538705	PAX6/CDON/PSEN1/EYA1/NANOG/ITGB1/EOMES/PTCH1/POU5F1	9
BP	GO:0043627	response to estrogen	17/1045	192/16266	0.111804	0.538705	GRN/CTNNA1/GAL/TBL1Y/PDGFB/AREG/CRYAB/PRDM2/MYOG/ASS1/WBP2/EGFR/SLC6A1/KAT5/TH/PTCH1/HMBS	17
BP	GO:0071407	cellular response to organic cyclic compound	30/1045	370/16266	0.111872	0.538705	CPS1/MSR1/CTNNA1/DNM2/REST/GNAS/PDGFB/FOLR1/PDE4D/ESRRB/AKAP1/MYOG/ASS1/SERPINF1/WBP2/FLOT1/TARBP2/CYP1A1/EGFR/DMTN/WNT10B/KAT5/BDNF/TH/GRIN2A/SMYD3/PTCH1/RXRA/PDE2A/HMBS	30
BP	GO:0045216	cell-cell junction organization	19/1045	219/16266	0.112341	0.538705	CD9/PRKCH/CTNNA1/ACTN1/EPB41L3/NUMBL/HRG/PTK2B/AJUBA/TBCD/PTPRK/DMTN/MPZ/PTK2/TLN2/GPBAR1/PKP3/GJA4/MYO1C	19
BP	GO:0051235	maintenance of location	19/1045	219/16266	0.112341	0.538705	CD4/MSR1/AP3D1/EPB41L3/ZNF268/MDFI/SLC30A3/FFAR2/SYNE1/CD36/BBS4/XCL1/ANK3/HK1/SUN1/TLN2/LCK/PDIA2/PLCG2	19
BP	GO:0001913	T cell mediated cytotoxicity	4/1045	29/16266	0.112412	0.538705	RAB27A/CTSH/XCL1/B2M	4
BP	GO:0005979	regulation of glycogen biosynthetic process	4/1045	29/16266	0.112412	0.538705	IGF1/PTH/PPP1CA/PPP1R3E	4
BP	GO:0010962	regulation of glucan biosynthetic process	4/1045	29/16266	0.112412	0.538705	IGF1/PTH/PPP1CA/PPP1R3E	4
BP	GO:0014808	release of sequestered calcium ion into cytosol by sarcoplasmic reticulum	4/1045	29/16266	0.112412	0.538705	PDE4D/CALM2/CALM3/DMD	4
BP	GO:0051180	vitamin transport	4/1045	29/16266	0.112412	0.538705	FOLR1/STRA6/SLC5A6/TCN2	4
BP	GO:0060740	prostate gland epithelium morphogenesis	4/1045	29/16266	0.112412	0.538705	IGF1/CD44/SULF1/RXRA	4
BP	GO:0070741	response to interleukin-6	4/1045	29/16266	0.112412	0.538705	GAB1/SMAD4/FER/SFTPC	4
BP	GO:0071868	cellular response to monoamine stimulus	4/1045	29/16266	0.112412	0.538705	DNM2/GNAS/PDE4D/BDNF	4
BP	GO:0097178	ruffle assembly	4/1045	29/16266	0.112412	0.538705	SH3YL1/PFN2/KANK1/EPS8L1	4
BP	GO:1903514	calcium ion transport from endoplasmic reticulum to cytosol	4/1045	29/16266	0.112412	0.538705	PDE4D/CALM2/CALM3/DMD	4
BP	GO:2000758	positive regulation of peptidyl-lysine acetylation	4/1045	29/16266	0.112412	0.538705	PPARGC1A/WBP2/SMAD4/TADA2A	4
BP	GO:0016202	regulation of striated muscle tissue development	10/1045	101/16266	0.113789	0.541672	CDON/HDAC4/MAPK14/MYOG/FLOT1/PRICKLE1/NRG1/PI16/WNT10B/BDNF	10
BP	GO:0042552	myelination	10/1045	101/16266	0.113789	0.541672	CD9/EPB41L3/ACSBG1/IFNG/PLP1/MYRF/SCN2A/NRG1/SH3TC2/RXRA	10
BP	GO:0018107	peptidyl-threonine phosphorylation	8/1045	76/16266	0.11383	0.541672	WNK1/PRKAG2/TRIM6/DMTN/CALM2/CALM3/CDK1/SPRED2	8
BP	GO:0034333	adherens junction assembly	8/1045	76/16266	0.11383	0.541672	ACTN1/HRG/PTK2B/AJUBA/TBCD/PTPRK/DMTN/PTK2	8
BP	GO:0034637	cellular carbohydrate biosynthetic process	8/1045	76/16266	0.11383	0.541672	IGF1/HAS1/UBC/PTH/LALBA/PPP1CA/LEP/PPP1R3E	8
BP	GO:0070371	ERK1 and ERK2 cascade	20/1045	233/16266	0.114025	0.541672	IGF1/CD44/THPO/TREM2/PDGFB/PRMT5/AVP/CCL22/NDRG4/CTSH/PTK2B/GLIPR2/DAB2IP/ARRB2/XCL1/EGFR/BMPER/WNK2/ST5/CCL14	20
BP	GO:0050678	regulation of epithelial cell proliferation	23/1045	274/16266	0.114316	0.541672	PAX6/IGF1/GRN/PDGFB/EYA1/HPN/IFNG/SEMA5A/RREB1/FOXP2/SERPINF1/MEN1/DAB2IP/SULF1/REG3G/VIP/EGFR/CASK/PTPRK/IFT122/WNT10B/SCN5A/PTCH1	23
BP	GO:0003013	circulatory system process	34/1045	427/16266	0.114488	0.541672	CPS1/MAP2K3/ELN/ATG5/HDAC4/TRHDE/PDGFB/AVP/IFNG/GNB3/PDE4D/POPDC2/PRCP/BBS4/REN/VIP/KCNMA1/EPB41/TNNI1/ABR/CALM2/CALM3/LEP/YES1/TH/SCN5A/CYP4F2/PDE2A/SLC4A5/MYH6/ADH5/NOS1AP/DMD/FXYD1	34
BP	GO:0014068	positive regulation of phosphatidylinositol 3-kinase signaling	6/1045	52/16266	0.114869	0.541672	IGF1/PDGFB/HAX1/NTRK2/PTK2/SELP	6
BP	GO:0031110	regulation of microtubule polymerization or depolymerization	6/1045	52/16266	0.114869	0.541672	TRIM54/TBCD/C16orf45/FES/GAS2L1/GAS2L2	6
BP	GO:0042398	cellular modified amino acid biosynthetic process	6/1045	52/16266	0.114869	0.541672	CPS1/DHPS/GGT1/GGT2/PADI2/PADI6	6
BP	GO:0060079	excitatory postsynaptic potential	6/1045	52/16266	0.114869	0.541672	RIMS1/PTK2B/DGKI/RIMS2/BDNF/GRIN2A	6
BP	GO:1900006	positive regulation of dendrite development	6/1045	52/16266	0.114869	0.541672	GRN/CAMK2B/PSEN1/EPHA4/DAB2IP/OPA1	6
BP	GO:1901863	positive regulation of muscle tissue development	6/1045	52/16266	0.114869	0.541672	CDON/PPARGC1A/MAPK14/MYOG/FLOT1/NRG1	6
BP	GO:0032946	positive regulation of mononuclear cell proliferation	11/1045	114/16266	0.1151	0.541672	IGF1/DHPS/CD276/IFNG/CD80/CDKN1A/XCL1/TMIGD2/CSF1/CD55/CARD11	11
BP	GO:0050680	negative regulation of epithelial cell proliferation	11/1045	114/16266	0.1151	0.541672	PAX6/HPN/SERPINF1/MEN1/DAB2IP/SULF1/CASK/PTPRK/IFT122/WNT10B/PTCH1	11
BP	GO:0050852	T cell receptor signaling pathway	11/1045	114/16266	0.1151	0.541672	CD4/PSEN1/FYB/PDE4D/TESPA1/UBC/HLA-DQB1/LCK/PLCG2/CARD11/HLA-DRA	11
BP	GO:0009311	oligosaccharide metabolic process	7/1045	64/16266	0.11523	0.541672	ST6GAL1/ST3GAL3/ALG8/LALBA/B3GALNT1/GAL3ST4/NEU4	7
BP	GO:1904030	negative regulation of cyclin-dependent protein kinase activity	7/1045	64/16266	0.11523	0.541672	WNK1/CDKN1A/GMFG/SH3BP5/MEN1/DAB2IP/WEE2	7
BP	GO:0010466	negative regulation of peptidase activity	21/1045	247/16266	0.115439	0.542113	CD44/PICALM/AVP/CSNK2A1/CRYAB/HRG/RPS6KA1/SERPINF1/SPINK5/ARRB2/AHSG/CAST/CPAMD8/PI16/SERPINA9/CST1/PROS1/SPOCK3/SERPINA3/NAIP/CARD18	21
BP	GO:1903706	regulation of hemopoiesis	26/1045	316/16266	0.116414	0.54517	PGLYRP1/AP3D1/FSTL3/HOXA9/GNAS/THPO/SOS2/IFNG/MAPK14/FOXP1/PTK2B/CD80/AP3B1/SPINK5/TESPA1/HAX1/ZEB1/NLRP3/TLR3/LEP/FES/LCK/CSF1/GAS2L1/HIST4H4/CARD11	26
[truncated: 5,008 more rows]
