# Supplementary material for: lncRNA-ZFAS1, an emerging gate-keeper in DNA damage-dependent transcriptional regulation
Source: Research Square preprint supplement (doi:10.21203/rs.3.rs-3233912/v1), 2023-09-13
Supplement: Supplementary file 8 [file cf530e7d4f3e84b4767d3f9d.xlsx]

## Sheet: WT_No UV_Ser5P_narrow_peaks
Chromosome	start	end	width	name	score	signalValue	'-log10pvalue	'-log10qvalue	peak_summit	annotation	geneStart	geneEnd	geneLength	geneStrand	geneId	transcriptId	distanceToTSS	geneName	geneDescription
20	50958215	50959017	803	WT_un_S5_peak_4998	51	4.08978	5.17629	1.93189	180	Promoter (<=1kb)	50934867	50958550	23684	-	ENSG00000000419	ENST00000466152	0	DPM1	dolichyl-phosphate mannosyltransferase subunit 1, catalytic [Source:HGNC Symbol;Acc:HGNC:3005]
1	169893483	169893849	367	WT_un_S5_peak_667	43	3.5241	4.31451	1.1925	114	Promoter (<=1kb)	169849631	169893896	44266	-	ENSG00000000457	ENST00000367771	47	SCYL3	SCY1 like pseudokinase 3 [Source:HGNC Symbol;Acc:HGNC:19285]
1	169794788	169795071	284	WT_un_S5_peak_666	35	3.46081	3.53919	0.53357	136	Promoter (<=1kb)	169795040	169854080	59041	+	ENSG00000000460	ENST00000359326	0	C1orf112	chromosome 1 open reading frame 112 [Source:HGNC Symbol;Acc:HGNC:25565]
6	143511263	143511841	579	WT_un_S5_peak_7355	40	3.93091	4.09223	0.99096	414	Promoter (<=1kb)	143494812	143511720	16909	-	ENSG00000001036	ENST00000002165	0	FUCA2	alpha-L-fucosidase 2 [Source:HGNC Symbol;Acc:HGNC:4008]
6	53544750	53545328	579	WT_un_S5_peak_7156	49	4.22019	4.92356	1.71247	243	Promoter (<=1kb)	53497341	53545101	47761	-	ENSG00000001084	ENST00000650454	0	GCLC	glutamate-cysteine ligase catalytic subunit [Source:HGNC Symbol;Acc:HGNC:4311]
6	41073054	41073405	352	WT_un_S5_peak_7095	42	3.19113	4.20198	1.09143	227	Promoter (<=1kb)	41072983	41097950	24968	+	ENSG00000001167	ENST00000353205	71	NFYA	nuclear transcription factor Y subunit alpha [Source:HGNC Symbol;Acc:HGNC:7804]
X	65534674	65534960	287	WT_un_S5_peak_8636	44	4.19238	4.45165	1.28046	151	Promoter (<=1kb)	65438549	65534782	96234	-	ENSG00000001497	ENST00000677056	0	LAS1L	LAS1 like ribosome biogenesis factor [Source:HGNC Symbol;Acc:HGNC:25726]
12	949484	949776	293	WT_un_S5_peak_1842	63	4.87211	6.39298	3.03397	146	Promoter (<=1kb)	911736	949694	37959	-	ENSG00000002016	ENST00000358495	0	RAD52	RAD52 homolog, DNA repair protein [Source:HGNC Symbol;Acc:HGNC:9824]
17	38869753	38870301	549	WT_un_S5_peak_3366	84	4.52708	8.44714	4.91684	249	Promoter (<=1kb)	38869859	38921769	51911	+	ENSG00000002834	ENST00000433206	0	LASP1	LIM and SH3 protein 1 [Source:HGNC Symbol;Acc:HGNC:6513]
17	48107335	48107683	349	WT_un_S5_peak_3446	45	3.60637	4.50786	1.33392	211	Promoter (<=1kb)	48107549	48119008	11460	+	ENSG00000002919	ENST00000578861	0	SNX11	sorting nexin 11 [Source:HGNC Symbol;Acc:HGNC:14975]
12	8949241	8949877	637	WT_un_S5_peak_1886	54	4.55817	5.42044	2.14934	245	Promoter (<=1kb)	8940361	8949645	9285	-	ENSG00000003056	ENST00000000412	0	M6PR	mannose-6-phosphate receptor, cation dependent [Source:HGNC Symbol;Acc:HGNC:6752]
2	201780668	201781373	706	WT_un_S5_peak_4684	35	3.46081	3.53919	0.53357	269	Promoter (<=1kb)	201700267	201780933	80667	-	ENSG00000003393	ENST00000264276	0	ALS2	alsin Rho guanine nucleotide exchange factor ALS2 [Source:HGNC Symbol;Acc:HGNC:443]
2	201116395	201116665	271	WT_un_S5_peak_4682	36	3.07067	3.62443	0.59626	106	Promoter (<=1kb)	201116407	201139877	23471	+	ENSG00000003402	ENST00000395148	0	CFLAR	CASP8 and FADD like apoptosis regulator [Source:HGNC Symbol;Acc:HGNC:1876]
2	37231312	37231736	425	WT_un_S5_peak_4329	90	6.31683	9.08008	5.50262	221	Promoter (<=1kb)	37231631	37247576	15946	+	ENSG00000003509	ENST00000455230	0	NDUFAF7	NADH:ubiquinone oxidoreductase complex assembly factor 7 [Source:HGNC Symbol;Acc:HGNC:28816]
3	50121729	50122005	277	WT_un_S5_peak_5527	25	2.77228	2.55201	0	178	Intron (ENST00000437204/ENSG00000235016, intron 3 of 3)	50116545	50117175	631	+	ENSG00000003756	ENST00000461242	5184	RBM5	RNA binding motif protein 5 [Source:HGNC Symbol;Acc:HGNC:9902]
17	28357243	28357565	323	WT_un_S5_peak_3331	96	5.88026	9.65303	6.04971	209	Promoter (<=1kb)	28346633	28357527	10895	-	ENSG00000004142	ENST00000540200	0	POLDIP2	DNA polymerase delta interacting protein 2 [Source:HGNC Symbol;Acc:HGNC:23781]
1	23019253	23019621	369	WT_un_S5_peak_88	30	2.52673	3.03847	0.13897	157	Promoter (<=1kb)	23019443	23083672	64230	+	ENSG00000004487	ENST00000465864	0	KDM1A	lysine demethylase 1A [Source:HGNC Symbol;Acc:HGNC:29079]
3	49939919	49940729	811	WT_un_S5_peak_5526a	43	3.2929	4.33276	1.20064	262	Promoter (<=1kb)	49940007	50077249	137243	+	ENSG00000004534	ENST00000442092	0	RBM6	RNA binding motif protein 6 [Source:HGNC Symbol;Acc:HGNC:9903]
3	49939919	49940729	811	WT_un_S5_peak_5526b	70	4.36781	7.02014	3.59168	652	Promoter (<=1kb)	49940007	50077249	137243	+	ENSG00000004534	ENST00000442092	0	RBM6	RNA binding motif protein 6 [Source:HGNC Symbol;Acc:HGNC:9903]
12	21501099	21501636	538	WT_un_S5_peak_1920	26	3.09502	2.69119	0	89	Promoter (<=1kb)	21468910	21501635	32726	-	ENSG00000004700	ENST00000444129	0	RECQL	RecQ like helicase [Source:HGNC Symbol;Acc:HGNC:9948]
X	11111075	11111659	585	WT_un_S5_peak_8547	40	3.5795	4.07966	0.98433	335	Promoter (<=1kb)	11111301	11123078	11778	+	ENSG00000004961	ENST00000321143	0	HCCS	holocytochrome c synthase [Source:HGNC Symbol;Acc:HGNC:4837]
17	7234340	7234807	468	WT_un_S5_peak_3258	52	4.42314	5.20795	1.9617	320	Promoter (<=1kb)	7225342	7234517	9176	-	ENSG00000004975	ENST00000005340	0	DVL2	dishevelled segment polarity protein 2 [Source:HGNC Symbol;Acc:HGNC:3086]
7	26864353	26864782	430	WT_un_S5_peak_7491	121	7.85024	12.1335	8.38243	242	Promoter (<=1kb)	26667068	26864590	197523	-	ENSG00000005020	ENST00000345317	0	SKAP2	src kinase associated phosphoprotein 2 [Source:HGNC Symbol;Acc:HGNC:15687]
X	119468230	119469096	867	WT_un_S5_peak_8678	86	6.3871	8.60744	5.05654	239	Promoter (<=1kb)	119468422	119470155	1734	+	ENSG00000005022	ENST00000475354	0	SLC25A5	solute carrier family 25 member 5 [Source:HGNC Symbol;Acc:HGNC:10991]
12	47705931	47706199	269	WT_un_S5_peak_1986	24	2.48318	2.48373	0	74	Promoter (<=1kb)	47661249	47706030	44782	-	ENSG00000005175	ENST00000005386	0	RPAP3	RNA polymerase II associated protein 3 [Source:HGNC Symbol;Acc:HGNC:26151]
16	20806365	20806777	413	WT_un_S5_peak_3064	95	6.25317	9.5596	5.95879	231	Promoter (<=1kb)	20806429	20821802	15374	+	ENSG00000005189	ENST00000568894	0	REXO5	RNA exonuclease 5 [Source:HGNC Symbol;Acc:HGNC:24661]
16	57447093	57447784	692	WT_un_S5_peak_3137	65	4.98138	6.55207	3.16577	327	Promoter (<=1kb)	57428187	57447385	19199	-	ENSG00000005194	ENST00000394391	0	CIAPIN1	cytokine induced apoptosis inhibitor 1 [Source:HGNC Symbol;Acc:HGNC:28050]
2	74421416	74421902	487	WT_un_S5_peak_4412	40	3.5795	4.07966	0.98433	390	Promoter (<=1kb)	74421678	74425474	3797	+	ENSG00000005448	ENST00000461531	0	WDR54	WD repeat domain 54 [Source:HGNC Symbol;Acc:HGNC:25770]
7	105012072	105015286	3215	WT_un_S5_peak_7635a	457	20.287	45.7289	41.1702	1118	Promoter (<=1kb)	105014190	105114084	99895	+	ENSG00000005483	ENST00000257745	0	KMT2E	lysine methyltransferase 2E (inactive) [Source:HGNC Symbol;Acc:HGNC:18541]
7	105012072	105015286	3215	WT_un_S5_peak_7635b	540	22.8475	54.0393	49.3511	1502	Promoter (<=1kb)	105014190	105114084	99895	+	ENSG00000005483	ENST00000257745	0	KMT2E	lysine methyltransferase 2E (inactive) [Source:HGNC Symbol;Acc:HGNC:18541]
7	105012072	105015286	3215	WT_un_S5_peak_7635c	129	7.43028	12.9133	9.13251	2198	Promoter (<=1kb)	105014190	105114084	99895	+	ENSG00000005483	ENST00000257745	0	KMT2E	lysine methyltransferase 2E (inactive) [Source:HGNC Symbol;Acc:HGNC:18541]
7	105016893	105017161	269	WT_un_S5_peak_7636	26	3.09502	2.69119	0	219	Promoter (2-3kb)	105014461	105063377	48917	+	ENSG00000005483	ENST00000474203	2432	KMT2E	lysine methyltransferase 2E (inactive) [Source:HGNC Symbol;Acc:HGNC:18541]
6	82247553	82247821	269	WT_un_S5_peak_7211	40	3.63653	4.09083	0.99096	127	Promoter (<=1kb)	82169987	82247744	77758	-	ENSG00000005700	ENST00000306270	0	IBTK	inhibitor of Bruton tyrosine kinase [Source:HGNC Symbol;Acc:HGNC:17853]
11	3378706	3379228	523	WT_un_S5_peak_1260	38	3.44846	3.88541	0.82322	260	Promoter (<=1kb)	3339261	3379133	39873	-	ENSG00000005801	ENST00000528796	0	ZNF195	zinc finger protein 195 [Source:HGNC Symbol;Acc:HGNC:12986]
17	50055453	50056442	990	WT_un_S5_peak_3459	71	4.44237	7.14869	3.7138	424	Promoter (<=1kb)	50055968	50076995	21028	+	ENSG00000005884	ENST00000506401	0	ITGA3	integrin subunit alpha 3 [Source:HGNC Symbol;Acc:HGNC:6139]
17	50056611	50057112	502	WT_un_S5_peak_3460	24	2.47408	2.41987	0	249	Promoter (<=1kb)	50056487	50064789	8303	+	ENSG00000005884	ENST00000508100	124	ITGA3	integrin subunit alpha 3 [Source:HGNC Symbol;Acc:HGNC:6139]
17	50061354	50061700	347	WT_un_S5_peak_3461	50	3.96001	5.04574	1.82209	171	Promoter (1-2kb)	50063538	50066032	2495	+	ENSG00000005884	ENST00000570989	-1838	ITGA3	integrin subunit alpha 3 [Source:HGNC Symbol;Acc:HGNC:6139]
17	50064239	50064812	574	WT_un_S5_peak_3462	27	2.68258	2.72944	0	130	Promoter (<=1kb)	50063538	50066032	2495	+	ENSG00000005884	ENST00000570989	701	ITGA3	integrin subunit alpha 3 [Source:HGNC Symbol;Acc:HGNC:6139]
X	120469109	120469430	322	WT_un_S5_peak_8684	44	3.82659	4.45165	1.28046	138	Promoter (<=1kb)	120426148	120469296	43149	-	ENSG00000005893	ENST00000200639	0	LAMP2	lysosomal associated membrane protein 2 [Source:HGNC Symbol;Acc:HGNC:6501]
17	45293872	45294222	351	WT_un_S5_peak_3429	42	3.48821	4.26024	1.14417	180	Promoter (2-3kb)	45263128	45290976	27849	-	ENSG00000006062	ENST00000376926	-2896	MAP3K14	mitogen-activated protein kinase kinase kinase 14 [Source:HGNC Symbol;Acc:HGNC:6853]
17	45315665	45316064	400	WT_un_S5_peak_3430	29	2.64517	2.95763	0.06978	295	Promoter (<=1kb)	45263119	45317020	53902	-	ENSG00000006062	ENST00000344686	956	MAP3K14	mitogen-activated protein kinase kinase kinase 14 [Source:HGNC Symbol;Acc:HGNC:6853]
17	45316348	45317206	859	WT_un_S5_peak_3431	117	3.91296	11.7722	8.04961	596	Promoter (<=1kb)	45263119	45317020	53902	-	ENSG00000006062	ENST00000344686	0	MAP3K14	mitogen-activated protein kinase kinase kinase 14 [Source:HGNC Symbol;Acc:HGNC:6853]
17	45317427	45317875	449	WT_un_S5_peak_3432	31	2.33372	3.15615	0.23813	255	Promoter (<=1kb)	45264636	45317029	52394	-	ENSG00000006062	ENST00000617331	-398	MAP3K14	mitogen-activated protein kinase kinase kinase 14 [Source:HGNC Symbol;Acc:HGNC:6853]
17	35587105	35587695	591	WT_un_S5_peak_3351	40	3.92167	4.07966	0.98433	385	Promoter (<=1kb)	35587274	35726409	139136	+	ENSG00000006125	ENST00000621914	0	AP2B1	adaptor related protein complex 2 subunit beta 1 [Source:HGNC Symbol;Acc:HGNC:563]
16	3282578	3283689	1112	WT_un_S5_peak_3032	54	4.27134	5.44039	2.16645	681	Promoter (<=1kb)	3283485	3286060	2576	+	ENSG00000006194	ENST00000572748	0	ZNF263	zinc finger protein 263 [Source:HGNC Symbol;Acc:HGNC:13056]
16	3019920	3025146	5227	WT_un_S5_peak_3030a	449	17.4282	44.9535	40.4091	590	Promoter (<=1kb)	3020359	3022383	2025	+	ENSG00000006327	ENST00000341627	0	TNFRSF12A	TNF receptor superfamily member 12A [Source:HGNC Symbol;Acc:HGNC:18152]
16	3019920	3025146	5227	WT_un_S5_peak_3030b	262	11.7404	26.2065	22.0123	1172	Promoter (<=1kb)	3020359	3022383	2025	+	ENSG00000006327	ENST00000341627	0	TNFRSF12A	TNF receptor superfamily member 12A [Source:HGNC Symbol;Acc:HGNC:18152]
16	3019920	3025146	5227	WT_un_S5_peak_3030c	152	7.63289	15.2574	11.372	2161	Promoter (<=1kb)	3020359	3022383	2025	+	ENSG00000006327	ENST00000341627	0	TNFRSF12A	TNF receptor superfamily member 12A [Source:HGNC Symbol;Acc:HGNC:18152]
16	3019920	3025146	5227	WT_un_S5_peak_3030d	175	9.18124	17.562	13.5936	2517	Promoter (<=1kb)	3020359	3022383	2025	+	ENSG00000006327	ENST00000341627	0	TNFRSF12A	TNF receptor superfamily member 12A [Source:HGNC Symbol;Acc:HGNC:18152]
16	3019920	3025146	5227	WT_un_S5_peak_3030e	172	8.97532	17.2265	13.282	3035	Promoter (<=1kb)	3020359	3022383	2025	+	ENSG00000006327	ENST00000341627	0	TNFRSF12A	TNF receptor superfamily member 12A [Source:HGNC Symbol;Acc:HGNC:18152]
16	3019920	3025146	5227	WT_un_S5_peak_3030f	324	13.6718	32.4564	28.1395	3860	Promoter (<=1kb)	3020359	3022383	2025	+	ENSG00000006327	ENST00000341627	0	TNFRSF12A	TNF receptor superfamily member 12A [Source:HGNC Symbol;Acc:HGNC:18152]
16	3019920	3025146	5227	WT_un_S5_peak_3030g	349	14.6379	34.9521	30.5857	4071	Promoter (<=1kb)	3020359	3022383	2025	+	ENSG00000006327	ENST00000341627	0	TNFRSF12A	TNF receptor superfamily member 12A [Source:HGNC Symbol;Acc:HGNC:18152]
16	3019920	3025146	5227	WT_un_S5_peak_3030h	44	3.63636	4.48395	1.31036	5047	Promoter (<=1kb)	3020359	3022383	2025	+	ENSG00000006327	ENST00000341627	0	TNFRSF12A	TNF receptor superfamily member 12A [Source:HGNC Symbol;Acc:HGNC:18152]
7	39623105	39623670	566	WT_un_S5_peak_7521	77	5.09487	7.73977	4.25346	352	Promoter (<=1kb)	39623565	39706391	82827	+	ENSG00000006451	ENST00000468201	0	RALA	RAS like proto-oncogene A [Source:HGNC Symbol;Acc:HGNC:9839]
7	13991043	13991311	269	WT_un_S5_peak_7435	49	3.92836	4.92356	1.71247	129	Promoter (<=1kb)	13895858	13991249	95392	-	ENSG00000006468	ENST00000403685	0	ETV1	ETS variant transcription factor 1 [Source:HGNC Symbol;Acc:HGNC:3490]
7	13991467	13991735	269	WT_un_S5_peak_7436	35	3.46081	3.53919	0.53357	124	Promoter (<=1kb)	13935893	13991425	55533	-	ENSG00000006468	ENST00000421381	-42	ETV1	ETS variant transcription factor 1 [Source:HGNC Symbol;Acc:HGNC:3490]
11	68010331	68010931	601	WT_un_S5_peak_1580	35	2.81625	3.53412	0.53357	250	Promoter (<=1kb)	68010343	68028157	17815	+	ENSG00000006534	ENST00000619675	0	ALDH3B1	aldehyde dehydrogenase 3 family member B1 [Source:HGNC Symbol;Acc:HGNC:410]
11	68012954	68013377	424	WT_un_S5_peak_1581	43	3.82526	4.36986	1.23565	157	Promoter (1-2kb)	68014968	68021522	6555	+	ENSG00000006534	ENST00000617449	-1591	ALDH3B1	aldehyde dehydrogenase 3 family member B1 [Source:HGNC Symbol;Acc:HGNC:410]
2	241356204	241356566	363	WT_un_S5_peak_4791	40	3.92167	4.07966	0.98433	143	Promoter (<=1kb)	241356285	241494841	138557	+	ENSG00000006607	ENST00000264042	0	FARP2	FERM, ARH/RhoGEF and pleckstrin domain protein 2 [Source:HGNC Symbol;Acc:HGNC:16460]
7	30504429	30504961	533	WT_un_S5_peak_7501	40	3.5795	4.07966	0.98433	84	Promoter (<=1kb)	30496621	30504829	8209	-	ENSG00000006625	ENST00000275428	0	GGCT	gamma-glutamylcyclotransferase [Source:HGNC Symbol;Acc:HGNC:21705]
7	87875982	87876643	662	WT_un_S5_peak_7588	40	3.5795	4.07966	0.98433	506	Promoter (<=1kb)	87876216	87908376	32161	+	ENSG00000006634	ENST00000413643	0	DBF4	DBF4 zinc finger [Source:HGNC Symbol;Acc:HGNC:17364]
7	112450110	112450750	641	WT_un_S5_peak_7650	146	8.9476	14.6369	10.775	326	Promoter (<=1kb)	112450126	112450741	616	+	ENSG00000006652	ENST00000417662	0	IFRD1	interferon related developmental regulator 1 [Source:HGNC Symbol;Acc:HGNC:5456]
17	14069451	14069816	366	WT_un_S5_peak_3288	29	2.84256	2.9599	0.06978	131	Promoter (<=1kb)	14069490	14217916	148427	+	ENSG00000006695	ENST00000670279	0	COX10	cytochrome c oxidase assembly factor heme A:farnesyltransferase COX10 [Source:HGNC Symbol;Acc:HGNC:2260]
19	39390697	39391560	864	WT_un_S5_peak_4028a	53	4.22146	5.37149	2.11295	216	Promoter (<=1kb)	39385629	39391106	5478	-	ENSG00000006712	ENST00000221265	0	PAF1	PAF1 homolog, Paf1/RNA polymerase II complex component [Source:HGNC Symbol;Acc:HGNC:25459]
19	39390697	39391560	864	WT_un_S5_peak_4028b	51	4.04769	5.11378	1.87259	700	Promoter (<=1kb)	39385629	39391106	5478	-	ENSG00000006712	ENST00000221265	0	PAF1	PAF1 homolog, Paf1/RNA polymerase II complex component [Source:HGNC Symbol;Acc:HGNC:25459]
17	12807492	12807858	367	WT_un_S5_peak_3280	26	2.72923	2.69119	0	118	Intron (ENST00000379672/ENSG00000006740, intron 1 of 20)	12790491	12929381	138891	+	ENSG00000006740	ENST00000578442	17001	ARHGAP44	Rho GTPase activating protein 44 [Source:HGNC Symbol;Acc:HGNC:29096]
17	13017793	13018447	655	WT_un_S5_peak_3281	59	4.606	5.94877	2.6174	440	Promoter (<=1kb)	12991612	13018027	26416	-	ENSG00000006744	ENST00000338034	0	ELAC2	elaC ribonuclease Z 2 [Source:HGNC Symbol;Acc:HGNC:14198]
X	2928862	2929374	513	WT_un_S5_peak_8535	75	5.65553	7.50295	4.04628	213	Promoter (<=1kb)	2903972	2929339	25368	-	ENSG00000006756	ENST00000381154	0	ARSD	arylsulfatase D [Source:HGNC Symbol;Acc:HGNC:717]
X	7927213	7927827	615	WT_un_S5_peak_8539	35	3.46081	3.53919	0.53357	140	Promoter (<=1kb)	7898247	7927413	29167	-	ENSG00000006757	ENST00000381042	0	PNPLA4	patatin like phospholipase domain containing 4 [Source:HGNC Symbol;Acc:HGNC:24887]
12	1690609	1691452	844	WT_un_S5_peak_1844	66	5.09666	6.66465	3.27049	537	Promoter (<=1kb)	1691070	1788674	97605	+	ENSG00000006831	ENST00000357103	0	ADIPOR2	adiponectin receptor 2 [Source:HGNC Symbol;Acc:HGNC:24041]
5	134366806	134367179	374	WT_un_S5_peak_6657	29	2.64517	2.95763	0.06978	172	Promoter (<=1kb)	134298424	134367171	68748	-	ENSG00000006837	ENST00000265334	0	CDKL3	cyclin dependent kinase like 3 [Source:HGNC Symbol;Acc:HGNC:15483]
5	134370949	134372146	1198	WT_un_S5_peak_6658a	89	5.52731	8.96105	5.39149	451	Promoter (<=1kb)	134286350	134371042	84693	-	ENSG00000006837	ENST00000520693	0	CDKL3	cyclin dependent kinase like 3 [Source:HGNC Symbol;Acc:HGNC:15483]
5	134370949	134372146	1198	WT_un_S5_peak_6658b	30	2.85629	3.02283	0.12613	891	Promoter (<=1kb)	134286350	134371042	84693	-	ENSG00000006837	ENST00000520693	0	CDKL3	cyclin dependent kinase like 3 [Source:HGNC Symbol;Acc:HGNC:15483]
1	112618962	112619263	302	WT_un_S5_peak_460	65	4.6961	6.55207	3.16577	140	Promoter (<=1kb)	112523514	112619141	95628	-	ENSG00000007341	ENST00000358039	0	ST7L	suppression of tumorigenicity 7 like [Source:HGNC Symbol;Acc:HGNC:18441]
1	112619471	112620083	613	WT_un_S5_peak_461	89	5.52731	8.96105	5.39149	344	Promoter (<=1kb)	112523518	112619783	96266	-	ENSG00000007341	ENST00000490715	0	ST7L	suppression of tumorigenicity 7 like [Source:HGNC Symbol;Acc:HGNC:18441]
16	229138	229577	440	WT_un_S5_peak_3012	53	4.22146	5.37149	2.11295	225	Promoter (<=1kb)	188969	229439	40471	-	ENSG00000007392	ENST00000426094	0	LUC7L	LUC7 like [Source:HGNC Symbol;Acc:HGNC:6723]
1	6701555	6701966	412	WT_un_S5_peak_20	82	5.00472	8.21275	4.69723	187	Promoter (<=1kb)	6634170	6701816	67647	-	ENSG00000007923	ENST00000377577	0	DNAJC11	DnaJ heat shock protein family (Hsp40) member C11 [Source:HGNC Symbol;Acc:HGNC:25570]
6	16128895	16129596	702	WT_un_S5_peak_6912	268	10.5215	26.8611	22.6533	274	Promoter (<=1kb)	16129086	16148248	19163	+	ENSG00000007944	ENST00000356840	0	MYLIP	myosin regulatory light chain interacting protein [Source:HGNC Symbol;Acc:HGNC:21155]
6	16130369	16130655	287	WT_un_S5_peak_6913	28	2.73872	2.85297	0	137	Promoter (1-2kb)	16129171	16148248	19078	+	ENSG00000007944	ENST00000349606	1198	MYLIP	myosin regulatory light chain interacting protein [Source:HGNC Symbol;Acc:HGNC:21155]
6	15245815	15246176	362	WT_un_S5_peak_6911	36	3.29878	3.62443	0.59626	166	Promoter (<=1kb)	15246069	15522042	275974	+	ENSG00000008083	ENST00000341776	0	JARID2	jumonji and AT-rich interaction domain containing 2 [Source:HGNC Symbol;Acc:HGNC:6196]
1	1724300	1724600	301	WT_un_S5_peak_10	34	3.42324	3.41144	0.44405	218	Promoter (<=1kb)	1702379	1724357	21979	-	ENSG00000008128	ENST00000404249	0	CDK11A	cyclin dependent kinase 11A [Source:HGNC Symbol;Acc:HGNC:1730]
3	38107707	38107975	269	WT_un_S5_peak_5447	33	3.34471	3.30737	0.35013	199	Promoter (1-2kb)	38109810	38111737	1928	+	ENSG00000008226	ENST00000477260	-1835	DLEC1	DLEC1 cilia and flagella associated protein [Source:HGNC Symbol;Acc:HGNC:2899]
7	6282832	6283312	481	WT_un_S5_peak_7421	41	2.93733	4.11731	1.01378	278	Distal Intergenic	6187064	6272644	85581	-	ENSG00000008256	ENST00000482460	-10188	CYTH3	cytohesin 3 [Source:HGNC Symbol;Acc:HGNC:9504]
7	6283552	6284155	604	WT_un_S5_peak_7422	50	3.98311	5.08049	1.8432	421	Distal Intergenic	6187064	6272644	85581	-	ENSG00000008256	ENST00000482460	-10908	CYTH3	cytohesin 3 [Source:HGNC Symbol;Acc:HGNC:9504]
7	6284568	6285118	551	WT_un_S5_peak_7423	28	3.03171	2.8941	0.02063	352	Distal Intergenic	6187064	6272644	85581	-	ENSG00000008256	ENST00000482460	-11924	CYTH3	cytohesin 3 [Source:HGNC Symbol;Acc:HGNC:9504]
17	51120624	51121989	1366	WT_un_S5_peak_3486a	69	3.369	6.99766	3.56933	160	Promoter (<=1kb)	50962174	51120865	158692	-	ENSG00000008294	ENST00000618113	0	SPAG9	sperm associated antigen 9 [Source:HGNC Symbol;Acc:HGNC:14524]
17	51120624	51121989	1366	WT_un_S5_peak_3486b	28	2.19586	2.85376	0	451	Promoter (<=1kb)	50962174	51120865	158692	-	ENSG00000008294	ENST00000618113	0	SPAG9	sperm associated antigen 9 [Source:HGNC Symbol;Acc:HGNC:14524]
17	51120624	51121989	1366	WT_un_S5_peak_3486c	32	2.65079	3.26135	0.3176	553	Promoter (<=1kb)	50962174	51120865	158692	-	ENSG00000008294	ENST00000618113	0	SPAG9	sperm associated antigen 9 [Source:HGNC Symbol;Acc:HGNC:14524]
17	51120624	51121989	1366	WT_un_S5_peak_3486d	27	2.36362	2.74451	0	687	Promoter (<=1kb)	50962174	51120865	158692	-	ENSG00000008294	ENST00000618113	0	SPAG9	sperm associated antigen 9 [Source:HGNC Symbol;Acc:HGNC:14524]
17	51120624	51121989	1366	WT_un_S5_peak_3486e	100	5.02426	10.0484	6.41851	1158	Promoter (<=1kb)	50962174	51120865	158692	-	ENSG00000008294	ENST00000618113	0	SPAG9	sperm associated antigen 9 [Source:HGNC Symbol;Acc:HGNC:14524]
7	122144011	122144323	313	WT_un_S5_peak_7659	44	3.82659	4.45165	1.28046	154	Promoter (<=1kb)	122064583	122144300	79718	-	ENSG00000008311	ENST00000679864	0	AASS	aminoadipate-semialdehyde synthase [Source:HGNC Symbol;Acc:HGNC:17366]
12	107092284	107094224	1941	WT_un_S5_peak_2224a	44	4.19238	4.45165	1.28046	317	Promoter (<=1kb)	106991364	107093549	102186	-	ENSG00000008405	ENST00000008527	0	CRY1	cryptochrome circadian regulator 1 [Source:HGNC Symbol;Acc:HGNC:2384]
12	107092284	107094224	1941	WT_un_S5_peak_2224b	58	4.21122	5.86499	2.55229	1083	Promoter (<=1kb)	106991364	107093549	102186	-	ENSG00000008405	ENST00000008527	0	CRY1	cryptochrome circadian regulator 1 [Source:HGNC Symbol;Acc:HGNC:2384]
19	13036971	13037599	629	WT_un_S5_peak_3903	75	5.65553	7.50295	4.04628	198	Intron (ENST00000592199/ENSG00000008441, intron 2 of 10)	13024939	13094770	69832	+	ENSG00000008441	ENST00000587260	12032	NFIX	nuclear factor I X [Source:HGNC Symbol;Acc:HGNC:7788]
8	133569572	133569880	309	WT_un_S5_peak_8175	32	3.24496	3.23664	0.29553	178	Promoter (<=1kb)	133476029	133570379	94351	-	ENSG00000008513	ENST00000519435	499	ST3GAL1	ST3 beta-galactoside alpha-2,3-sialyltransferase 1 [Source:HGNC Symbol;Acc:HGNC:10862]
8	133570373	133572423	2051	WT_un_S5_peak_8176a	24	2.89517	2.43654	0	301	Promoter (<=1kb)	133454848	133571887	117040	-	ENSG00000008513	ENST00000522652	0	ST3GAL1	ST3 beta-galactoside alpha-2,3-sialyltransferase 1 [Source:HGNC Symbol;Acc:HGNC:10862]
8	133570373	133572423	2051	WT_un_S5_peak_8176b	78	5.09423	7.85256	4.36153	1890	Promoter (<=1kb)	133454848	133571887	117040	-	ENSG00000008513	ENST00000522652	0	ST3GAL1	ST3 beta-galactoside alpha-2,3-sialyltransferase 1 [Source:HGNC Symbol;Acc:HGNC:10862]
3	169966538	169967104	567	WT_un_S5_peak_5851	23	2.38633	2.34354	0	476	Promoter (<=1kb)	169966635	169968523	1889	+	ENSG00000008952	ENST00000461933	0	SEC62	SEC62 homolog, preprotein translocation factor [Source:HGNC Symbol;Acc:HGNC:11846]
8	56074170	56074861	692	WT_un_S5_peak_7910	481	16.6519	48.1375	43.5407	256	Promoter (<=1kb)	56067269	56074508	7240	-	ENSG00000008988	ENST00000676461	0	RPS20	ribosomal protein S20 [Source:HGNC Symbol;Acc:HGNC:10405]
1	114757695	114758235	541	WT_un_S5_peak_468	87	6.08558	8.72862	5.16636	272	Promoter (<=1kb)	114716913	114757983	41071	-	ENSG00000009307	ENST00000339438	0	CSDE1	cold shock domain containing E1 [Source:HGNC Symbol;Acc:HGNC:29905]
6	111482048	111482316	269	WT_un_S5_peak_7263	32	3.23733	3.22608	0.28631	190	Promoter (<=1kb)	111299031	111482919	183889	-	ENSG00000009413	ENST00000434009	603	REV3L	REV3 like, DNA directed polymerase zeta catalytic subunit [Source:HGNC Symbol;Acc:HGNC:9968]
6	111482809	111484453	1645	WT_un_S5_peak_7264a	93	5.35178	9.31879	5.72445	240	Promoter (<=1kb)	111299031	111482919	183889	-	ENSG00000009413	ENST00000434009	0	REV3L	REV3 like, DNA directed polymerase zeta catalytic subunit [Source:HGNC Symbol;Acc:HGNC:9968]
6	111482809	111484453	1645	WT_un_S5_peak_7264b	50	3.98311	5.08049	1.8432	809	Promoter (<=1kb)	111299031	111482919	183889	-	ENSG00000009413	ENST00000434009	0	REV3L	REV3 like, DNA directed polymerase zeta catalytic subunit [Source:HGNC Symbol;Acc:HGNC:9968]
6	111482809	111484453	1645	WT_un_S5_peak_7264c	157	9.23028	15.7942	11.8949	1120	Promoter (<=1kb)	111299031	111482919	183889	-	ENSG00000009413	ENST00000434009	0	REV3L	REV3 like, DNA directed polymerase zeta catalytic subunit [Source:HGNC Symbol;Acc:HGNC:9968]
1	231337617	231338598	982	WT_un_S5_peak_863	46	3.99126	4.60285	1.42296	644	Promoter (<=1kb)	231338256	231352521	14266	+	ENSG00000010072	ENST00000008440	0	SPRTN	SprT-like N-terminal domain [Source:HGNC Symbol;Acc:HGNC:25356]
12	4615513	4615781	269	WT_un_S5_peak_1856	43	3.73916	4.31906	1.1948	241	Promoter (2-3kb)	4612517	4613823	1307	+	ENSG00000010219	ENST00000544050	2996	DYRK4	dual specificity tyrosine phosphorylation regulated kinase 4 [Source:HGNC Symbol;Acc:HGNC:3095]
17	32350049	32350367	319	WT_un_S5_peak_3343	46	3.71527	4.60285	1.42296	160	Promoter (<=1kb)	32350132	32370451	20320	+	ENSG00000010244	ENST00000321233	0	ZNF207	zinc finger protein 207 [Source:HGNC Symbol;Acc:HGNC:12998]
7	38177863	38178169	307	WT_un_S5_peak_7520	49	4.26383	4.98931	1.76911	146	Promoter (<=1kb)	38178245	38230669	52425	+	ENSG00000010270	ENST00000009041	-76	STARD3NL	STARD3 N-terminal like [Source:HGNC Symbol;Acc:HGNC:19169]
12	6215664	6216874	1211	WT_un_S5_peak_1859a	102	6.33447	10.2683	6.62034	368	Intron (ENST00000382518/ENSG00000010278, intron 2 of 8)	6224264	6238265	14002	+	ENSG00000010278	ENST00000676788	-7390	CD9	CD9 molecule [Source:HGNC Symbol;Acc:HGNC:1709]
12	6215664	6216874	1211	WT_un_S5_peak_1859b	38	3.40435	3.82039	0.77264	1142	Intron (ENST00000382518/ENSG00000010278, intron 2 of 8)	6224264	6238265	14002	+	ENSG00000010278	ENST00000676788	-7390	CD9	CD9 molecule [Source:HGNC Symbol;Acc:HGNC:1709]
12	6493017	6494343	1327	WT_un_S5_peak_1863	141	7.81172	14.1886	10.3528	818	Promoter (<=1kb)	6493356	6511192	17837	+	ENSG00000010292	ENST00000541399	0	NCAPD2	non-SMC condensin I complex subunit D2 [Source:HGNC Symbol;Acc:HGNC:24305]
12	6529421	6529729	309	WT_un_S5_peak_1864	25	2.76105	2.57922	0	165	Promoter (<=1kb)	6529260	6530730	1471	+	ENSG00000010292	ENST00000539885	161	NCAPD2	non-SMC condensin I complex subunit D2 [Source:HGNC Symbol;Acc:HGNC:24305]
3	52410696	52410964	269	WT_un_S5_peak_5537	26	2.85368	2.65939	0	160	Promoter (<=1kb)	52410890	52414844	3955	+	ENSG00000010318	ENST00000473145	0	PHF7	PHD finger protein 7 [Source:HGNC Symbol;Acc:HGNC:18458]
X	149503622	149504188	567	WT_un_S5_peak_8698	56	4.43738	5.69186	2.39319	120	Promoter (<=1kb)	149487287	149504219	16933	-	ENSG00000010404	ENST00000464251	31	IDS	iduronate 2-sulfatase [Source:HGNC Symbol;Acc:HGNC:5389]
X	149504921	149505498	578	WT_un_S5_peak_8699	185	10.4108	18.585	14.5892	297	Promoter (<=1kb)	149476988	149505306	28319	-	ENSG00000010404	ENST00000340855	0	IDS	iduronate 2-sulfatase [Source:HGNC Symbol;Acc:HGNC:5389]
12	6904737	6905247	511	WT_un_S5_peak_1875	36	3.07067	3.62443	0.59626	349	Promoter (<=1kb)	6904791	6914194	9404	+	ENSG00000010626	ENST00000451681	0	LRRC23	leucine rich repeat containing 23 [Source:HGNC Symbol;Acc:HGNC:19138]
6	111666725	111666993	269	WT_un_S5_peak_7266	35	3.46081	3.53919	0.53357	186	Intron (ENST00000538466/ENSG00000010810, intron 10 of 10)	111661557	111676544	14988	-	ENSG00000010810	ENST00000491885	9551	FYN	FYN proto-oncogene, Src family tyrosine kinase [Source:HGNC Symbol;Acc:HGNC:4037]
6	142902736	142903233	498	WT_un_S5_peak_7350	30	2.52673	3.03847	0.13897	324	Intron (ENST00000012134/ENSG00000010818, intron 1 of 8)	142751469	142945031	193563	-	ENSG00000010818	ENST00000012134	41798	HIVEP2	HIVEP zinc finger 2 [Source:HGNC Symbol;Acc:HGNC:4921]
6	142930475	142930743	269	WT_un_S5_peak_7351	32	3.23733	3.22608	0.28631	160	Intron (ENST00000012134/ENSG00000010818, intron 1 of 8)	142751469	142945031	193563	-	ENSG00000010818	ENST00000012134	14288	HIVEP2	HIVEP zinc finger 2 [Source:HGNC Symbol;Acc:HGNC:4921]
6	142944298	142947542	3245	WT_un_S5_peak_7352a	207	9.22967	20.7457	16.6876	448	Promoter (<=1kb)	142751469	142945031	193563	-	ENSG00000010818	ENST00000012134	0	HIVEP2	HIVEP zinc finger 2 [Source:HGNC Symbol;Acc:HGNC:4921]
6	142944298	142947542	3245	WT_un_S5_peak_7352b	98	5.49333	9.88712	6.26064	1327	Promoter (<=1kb)	142751469	142945031	193563	-	ENSG00000010818	ENST00000012134	0	HIVEP2	HIVEP zinc finger 2 [Source:HGNC Symbol;Acc:HGNC:4921]
6	142944298	142947542	3245	WT_un_S5_peak_7352c	79	4.16913	7.99138	4.48953	1844	Promoter (<=1kb)	142751469	142945031	193563	-	ENSG00000010818	ENST00000012134	0	HIVEP2	HIVEP zinc finger 2 [Source:HGNC Symbol;Acc:HGNC:4921]
6	142944298	142947542	3245	WT_un_S5_peak_7352d	24	2.303	2.41987	0	2917	Promoter (<=1kb)	142751469	142945031	193563	-	ENSG00000010818	ENST00000012134	0	HIVEP2	HIVEP zinc finger 2 [Source:HGNC Symbol;Acc:HGNC:4921]
17	51153520	51153966	447	WT_un_S5_peak_3487	41	3.16833	4.12701	1.02315	352	Promoter (<=1kb)	51153590	51171744	18155	+	ENSG00000011052	ENST00000393193	0	NME1-NME2	NME1-NME2 readthrough [Source:HGNC Symbol;Acc:HGNC:33531]
17	58219036	58219338	303	WT_un_S5_peak_3521	43	3.7859	4.31451	1.1925	134	Promoter (<=1kb)	58205441	58219245	13805	-	ENSG00000011143	ENST00000678568	0	MKS1	MKS transition zone complex subunit 1 [Source:HGNC Symbol;Acc:HGNC:7121]
3	43690668	43691168	501	WT_un_S5_peak_5476	30	2.89282	3.03845	0.13897	257	Promoter (<=1kb)	43690880	43718797	27918	+	ENSG00000011198	ENST00000458276	0	ABHD5	abhydrolase domain containing 5, lysophosphatidic acid acyltransferase [Source:HGNC Symbol;Acc:HGNC:21396]
19	15418602	15419008	407	WT_un_S5_peak_3926	38	3.7781	3.88541	0.82322	256	Promoter (<=1kb)	15380050	15418988	38939	-	ENSG00000011243	ENST00000397410	0	AKAP8L	A-kinase anchoring protein 8 like [Source:HGNC Symbol;Acc:HGNC:29857]
17	15999414	15999999	586	WT_un_S5_peak_3290	105	5.09199	10.5371	6.88261	374	Promoter (<=1kb)	15999784	16004251	4468	+	ENSG00000011295	ENST00000466729	0	TTC19	tetratricopeptide repeat domain 19 [Source:HGNC Symbol;Acc:HGNC:26006]
19	797067	797847	781	WT_un_S5_peak_3808	242	11.2896	24.2668	20.1138	386	Promoter (<=1kb)	797075	812327	15253	+	ENSG00000011304	ENST00000635647	0	PTBP1	polypyrimidine tract binding protein 1 [Source:HGNC Symbol;Acc:HGNC:9583]
19	798176	798771	596	WT_un_S5_peak_3809	33	3.05288	3.30737	0.35013	437	Promoter (<=1kb)	798428	812275	13848	+	ENSG00000011304	ENST00000679114	0	PTBP1	polypyrimidine tract binding protein 1 [Source:HGNC Symbol;Acc:HGNC:9583]
3	45480833	45481161	329	WT_un_S5_peak_5484	35	3.46081	3.53919	0.53357	117	Intron (ENST00000650792/ENSG00000011376, intron 9 of 20)	45500541	45538463	37923	+	ENSG00000011376	ENST00000467936	-19380	LARS2	leucyl-tRNA synthetase 2, mitochondrial [Source:HGNC Symbol;Acc:HGNC:17095]
11	17170827	17171413	587	WT_un_S5_peak_1344	29	2.84256	2.9599	0.06978	94	Promoter (1-2kb)	17086572	17169741	83170	-	ENSG00000011405	ENST00000265970	-1086	PIK3C2A	phosphatidylinositol-4-phosphate 3-kinase catalytic subunit type 2 alpha [Source:HGNC Symbol;Acc:HGNC:8971]
11	17207794	17208295	502	WT_un_S5_peak_1345	52	3.84411	5.28062	2.03171	302	Promoter (<=1kb)	17077730	17207920	130191	-	ENSG00000011405	ENST00000531428	0	PIK3C2A	phosphatidylinositol-4-phosphate 3-kinase catalytic subunit type 2 alpha [Source:HGNC Symbol;Acc:HGNC:8971]
19	43668769	43669281	513	WT_un_S5_peak_4088	61	4.38213	6.1328	2.78811	257	Promoter (<=1kb)	43652226	43668320	16095	-	ENSG00000011422	ENST00000599892	-449	PLAUR	plasminogen activator, urokinase receptor [Source:HGNC Symbol;Acc:HGNC:9053]
19	43670039	43670307	269	WT_un_S5_peak_4089	30	2.89282	3.03845	0.13897	126	Promoter (<=1kb)	43646095	43670166	24072	-	ENSG00000011422	ENST00000339082	0	PLAUR	plasminogen activator, urokinase receptor [Source:HGNC Symbol;Acc:HGNC:9053]
7	36389673	36390677	1005	WT_un_S5_peak_7518	230	10.3308	23.0988	18.9726	268	Promoter (<=1kb)	36389821	36453791	63971	+	ENSG00000011426	ENST00000396068	0	ANLN	anillin actin binding protein [Source:HGNC Symbol;Acc:HGNC:14082]
9	122940953	122941232	280	WT_un_S5_peak_8449	42	4.03983	4.24101	1.12646	136	Promoter (<=1kb)	122941020	122986416	45397	+	ENSG00000011454	ENST00000459903	0	RABGAP1	RAB GTPase activating protein 1 [Source:HGNC Symbol;Acc:HGNC:17155]
19	45692639	45692907	269	WT_un_S5_peak_4114	33	3.10266	3.33205	0.37367	148	Promoter (<=1kb)	45692666	45703987	11322	+	ENSG00000011478	ENST00000012049	0	QPCTL	glutaminyl-peptide cyclotransferase like [Source:HGNC Symbol;Acc:HGNC:25952]
17	43125194	43125977	784	WT_un_S5_peak_3400	54	3.98169	5.43989	2.16645	304	Promoter (<=1kb)	43044295	43125364	81070	-	ENSG00000012048	ENST00000357654	0	BRCA1	BRCA1 DNA repair associated [Source:HGNC Symbol;Acc:HGNC:1100]
19	45418951	45419238	288	WT_un_S5_peak_4104	23	2.61444	2.34354	0	131	Promoter (<=1kb)	45409616	45419186	9571	-	ENSG00000012061	ENST00000590701	0	ERCC1	ERCC excision repair 1, endonuclease non-catalytic subunit [Source:HGNC Symbol;Acc:HGNC:3433]
19	45423596	45424428	833	WT_un_S5_peak_4105	47	3.3295	4.79185	1.59279	418	Promoter (<=1kb)	45407334	45423917	16584	-	ENSG00000012061	ENST00000300853	0	ERCC1	ERCC excision repair 1, endonuclease non-catalytic subunit [Source:HGNC Symbol;Acc:HGNC:3433]
19	45443638	45443946	309	WT_un_S5_peak_4106	48	3.85686	4.89002	1.6872	167	Intron (ENST00000423698/ENSG00000012061, intron 1 of 8)	45413963	45450725	36763	-	ENSG00000012061	ENST00000592083	6779	ERCC1	ERCC excision repair 1, endonuclease non-catalytic subunit [Source:HGNC Symbol;Acc:HGNC:3433]
19	45444329	45444597	269	WT_un_S5_peak_4107	29	2.82607	2.93622	0.0587	126	Intron (ENST00000423698/ENSG00000012061, intron 1 of 8)	45413963	45450725	36763	-	ENSG00000012061	ENST00000592083	6128	ERCC1	ERCC excision repair 1, endonuclease non-catalytic subunit [Source:HGNC Symbol;Acc:HGNC:3433]
19	45450690	45451821	1132	WT_un_S5_peak_4108	181	8.34696	18.1482	14.1697	435	Promoter (<=1kb)	45413963	45450725	36763	-	ENSG00000012061	ENST00000592083	0	ERCC1	ERCC excision repair 1, endonuclease non-catalytic subunit [Source:HGNC Symbol;Acc:HGNC:3433]
19	45455720	45456034	315	WT_un_S5_peak_4109	42	3.70955	4.20702	1.09574	123	Intron (ENST00000423698/ENSG00000012061, intron 1 of 8)	45413963	45450725	36763	-	ENSG00000012061	ENST00000592083	-4995	ERCC1	ERCC excision repair 1, endonuclease non-catalytic subunit [Source:HGNC Symbol;Acc:HGNC:3433]
19	45478001	45478860	860	WT_un_S5_peak_4111a	51	4.08978	5.17629	1.93189	202	Promoter (<=1kb)	45407334	45478828	71495	-	ENSG00000012061	ENST00000423698	0	ERCC1	ERCC excision repair 1, endonuclease non-catalytic subunit [Source:HGNC Symbol;Acc:HGNC:3433]
19	45478001	45478860	860	WT_un_S5_peak_4111b	43	3.7859	4.31451	1.1925	481	Promoter (<=1kb)	45407334	45478828	71495	-	ENSG00000012061	ENST00000423698	0	ERCC1	ERCC excision repair 1, endonuclease non-catalytic subunit [Source:HGNC Symbol;Acc:HGNC:3433]
X	21839543	21839811	269	WT_un_S5_peak_8561	26	3.09502	2.69119	0	84	Promoter (<=1kb)	21839617	21885423	45807	+	ENSG00000012174	ENST00000379484	0	MBTPS2	membrane bound transcription factor peptidase, site 2 [Source:HGNC Symbol;Acc:HGNC:15455]
X	49175934	49176316	383	WT_un_S5_peak_8622	33	3.05288	3.30737	0.35013	173	Promoter (2-3kb)	49177137	49179283	2147	-	ENSG00000012211	ENST00000614014	2967	PRICKLE3	prickle planar cell polarity protein 3 [Source:HGNC Symbol;Acc:HGNC:6645]
6	53348059	53348543	485	WT_un_S5_peak_7155	49	4.22019	4.92356	1.71247	156	Promoter (<=1kb)	53294088	53348926	54839	-	ENSG00000012660	ENST00000370913	383	ELOVL5	ELOVL fatty acid elongase 5 [Source:HGNC Symbol;Acc:HGNC:21308]
14	93207047	93207700	654	WT_un_S5_peak_2724	30	3.11882	3.06293	0.15335	145	Promoter (<=1kb)	93207241	93218557	11317	+	ENSG00000012963	ENST00000554232	0	UBR7	ubiquitin protein ligase E3 component n-recognin 7 [Source:HGNC Symbol;Acc:HGNC:20344]
19	39970696	39971632	937	WT_un_S5_peak_4036a	94	6.17518	9.43754	5.84042	207	Promoter (<=1kb)	39971165	39981764	10600	+	ENSG00000013275	ENST00000157812	0	PSMC4	proteasome 26S subunit, ATPase 4 [Source:HGNC Symbol;Acc:HGNC:9551]
19	39970696	39971632	937	WT_un_S5_peak_4036b	72	5.47231	7.26522	3.82609	569	Promoter (<=1kb)	39971165	39981764	10600	+	ENSG00000013275	ENST00000157812	0	PSMC4	proteasome 26S subunit, ATPase 4 [Source:HGNC Symbol;Acc:HGNC:9551]
4	6574948	6575216	269	WT_un_S5_peak_5966	23	2.45954	2.30424	0	159	Promoter (<=1kb)	6575189	6621354	46166	+	ENSG00000013288	ENST00000504248	0	MAN2B2	mannosidase alpha class 2B member 2 [Source:HGNC Symbol;Acc:HGNC:29623]
6	83192980	83193511	532	WT_un_S5_peak_7213	54	4.55817	5.42044	2.14934	263	Promoter (<=1kb)	83164873	83193265	28393	-	ENSG00000013375	ENST00000513973	0	PGM3	phosphoglucomutase 3 [Source:HGNC Symbol;Acc:HGNC:8907]
2	200864000	200865072	1073	WT_un_S5_peak_4680a	51	4.06837	5.13427	1.89147	174	Promoter (<=1kb)	200853009	200864658	11650	-	ENSG00000013441	ENST00000321356	0	CLK1	CDC like kinase 1 [Source:HGNC Symbol;Acc:HGNC:2068]
2	200864000	200865072	1073	WT_un_S5_peak_4680b	67	5.09567	6.71822	3.31136	693	Promoter (<=1kb)	200853009	200864658	11650	-	ENSG00000013441	ENST00000321356	0	CLK1	CDC like kinase 1 [Source:HGNC Symbol;Acc:HGNC:2068]
5	141968930	141969491	562	WT_un_S5_peak_6693	50	4.0206	5.06236	1.83706	132	Promoter (<=1kb)	141969095	141980277	11183	+	ENSG00000013561	ENST00000514620	0	RNF14	ring finger protein 14 [Source:HGNC Symbol;Acc:HGNC:10058]
12	31073676	31074405	730	WT_un_S5_peak_1943	115	6.59775	11.566	7.85068	259	Promoter (<=1kb)	31073860	31094633	20774	+	ENSG00000013573	ENST00000542129	0	DDX11	DEAD/H-box helicase 11 [Source:HGNC Symbol;Acc:HGNC:2736]
12	12891096	12892225	1130	WT_un_S5_peak_1903	112	6.26422	11.2084	7.51079	495	Promoter (<=1kb)	12891559	12909876	18318	+	ENSG00000013588	ENST00000537783	0	GPRC5A	G protein-coupled receptor class C group 5 member A [Source:HGNC Symbol;Acc:HGNC:9836]
12	12901135	12901482	348	WT_un_S5_peak_1904	32	3.24496	3.23664	0.29553	131	Intron (ENST00000537783/ENSG00000013588, intron 1 of 1)	12908244	12913411	5168	+	ENSG00000013588	ENST00000648791	-6762	GPRC5A	G protein-coupled receptor class C group 5 member A [Source:HGNC Symbol;Acc:HGNC:9836]
6	96521530	96522182	653	WT_un_S5_peak_7240	146	8.9476	14.6369	10.775	385	Promoter (<=1kb)	96521595	96522964	1370	+	ENSG00000014123	ENST00000461673	0	UFL1	UFM1 specific ligase 1 [Source:HGNC Symbol;Acc:HGNC:23039]
11	65261738	65262259	522	WT_un_S5_peak_1529	76	4.356	7.66459	4.19151	285	Promoter (<=1kb)	65261920	65296498	34579	+	ENSG00000014138	ENST00000527850	0	POLA2	DNA polymerase alpha 2, accessory subunit [Source:HGNC Symbol;Acc:HGNC:30073]
4	41990393	41990809	417	WT_un_S5_peak_6026	56	4.76702	5.69186	2.39319	247	Promoter (<=1kb)	41990502	42086369	95868	+	ENSG00000014824	ENST00000513699	0	SLC30A9	solute carrier family 30 member 9 [Source:HGNC Symbol;Acc:HGNC:1329]
10	99731937	99732524	588	WT_un_S5_peak_1150	52	4.16738	5.28347	2.03301	317	Promoter (<=1kb)	99710868	99732127	21260	-	ENSG00000014919	ENST00000016171	0	COX15	cytochrome c oxidase assembly homolog COX15 [Source:HGNC Symbol;Acc:HGNC:2263]
5	139293524	139294580	1057	WT_un_S5_peak_6680a	322	12.5727	32.2606	27.9479	317	Promoter (<=1kb)	139293674	139318987	25314	+	ENSG00000015479	ENST00000512876	0	MATR3	matrin 3 [Source:HGNC Symbol;Acc:HGNC:6912]
5	139293524	139294580	1057	WT_un_S5_peak_6680b	75	4.35104	7.53884	4.07078	878	Promoter (<=1kb)	139293674	139318987	25314	+	ENSG00000015479	ENST00000512876	0	MATR3	matrin 3 [Source:HGNC Symbol;Acc:HGNC:6912]
7	44490562	44490966	405	WT_un_S5_peak_7531	53	4.51749	5.36032	2.10295	151	Promoter (<=1kb)	44379119	44490658	111540	-	ENSG00000015676	ENST00000355451	0	NUDCD3	NudC domain containing 3 [Source:HGNC Symbol;Acc:HGNC:22208]
5	51382644	51383821	1178	WT_un_S5_peak_6342	300	10.0017	30.0967	25.8252	628	Promoter (<=1kb)	51383448	51394730	11283	+	ENSG00000016082	ENST00000230658	0	ISL1	ISL LIM homeobox 1 [Source:HGNC Symbol;Acc:HGNC:6132]
3	52696007	52696303	297	WT_un_S5_peak_5541	23	2.49183	2.34975	0	153	Promoter (<=1kb)	52694672	52696580	1909	-	ENSG00000016864	ENST00000481643	277	GLT8D1	glycosyltransferase 8 domain containing 1 [Source:HGNC Symbol;Acc:HGNC:24870]
3	52705495	52706448	954	WT_un_S5_peak_5542a	46	3.99126	4.60285	1.42296	354	Promoter (<=1kb)	52694486	52705791	11306	-	ENSG00000016864	ENST00000266014	0	GLT8D1	glycosyltransferase 8 domain containing 1 [Source:HGNC Symbol;Acc:HGNC:24870]
3	52705495	52706448	954	WT_un_S5_peak_5542b	53	4.22146	5.37149	2.11295	749	Promoter (<=1kb)	52694486	52705791	11306	-	ENSG00000016864	ENST00000266014	0	GLT8D1	glycosyltransferase 8 domain containing 1 [Source:HGNC Symbol;Acc:HGNC:24870]
3	130893673	130894008	336	WT_un_S5_peak_5710	35	3.46081	3.53919	0.53357	161	Promoter (<=1kb)	130893991	131003150	109160	+	ENSG00000017260	ENST00000508532	0	ATP2C1	ATPase secretory pathway Ca2+ transporting 1 [Source:HGNC Symbol;Acc:HGNC:13211]
3	149657797	149658701	905	WT_un_S5_peak_5760	79	5.97467	7.99793	4.48953	647	Promoter (<=1kb)	149517235	149658025	140791	-	ENSG00000018408	ENST00000360632	0	WWTR1	WW domain containing transcription regulator 1 [Source:HGNC Symbol;Acc:HGNC:24042]
20	54132582	54134676	2095	WT_un_S5_peak_5008a	36	3.07067	3.62443	0.59626	1228	Distal Intergenic	54154370	54157298	2929	-	ENSG00000019186	ENST00000460643	22622	CYP24A1	cytochrome P450 family 24 subfamily A member 1 [Source:HGNC Symbol;Acc:HGNC:2602]
20	54132582	54134676	2095	WT_un_S5_peak_5008b	47	4.10774	4.76379	1.57115	2001	Distal Intergenic	54154370	54157298	2929	-	ENSG00000019186	ENST00000460643	22622	CYP24A1	cytochrome P450 family 24 subfamily A member 1 [Source:HGNC Symbol;Acc:HGNC:2602]
20	54135443	54135946	504	WT_un_S5_peak_5009	24	2.553	2.43654	0	83	Distal Intergenic	54154370	54157298	2929	-	ENSG00000019186	ENST00000460643	21352	CYP24A1	cytochrome P450 family 24 subfamily A member 1 [Source:HGNC Symbol;Acc:HGNC:2602]
20	54136589	54138862	2274	WT_un_S5_peak_5010a	32	3.23733	3.22608	0.28631	142	Distal Intergenic	54154370	54157298	2929	-	ENSG00000019186	ENST00000460643	18436	CYP24A1	cytochrome P450 family 24 subfamily A member 1 [Source:HGNC Symbol;Acc:HGNC:2602]
20	54136589	54138862	2274	WT_un_S5_peak_5010b	29	2.84256	2.9599	0.06978	459	Distal Intergenic	54154370	54157298	2929	-	ENSG00000019186	ENST00000460643	18436	CYP24A1	cytochrome P450 family 24 subfamily A member 1 [Source:HGNC Symbol;Acc:HGNC:2602]
20	54136589	54138862	2274	WT_un_S5_peak_5010c	86	5.61847	8.68165	5.12359	904	Distal Intergenic	54154370	54157298	2929	-	ENSG00000019186	ENST00000460643	18436	CYP24A1	cytochrome P450 family 24 subfamily A member 1 [Source:HGNC Symbol;Acc:HGNC:2602]
20	54136589	54138862	2274	WT_un_S5_peak_5010d	43	4.15497	4.39973	1.26294	1551	Distal Intergenic	54154370	54157298	2929	-	ENSG00000019186	ENST00000460643	18436	CYP24A1	cytochrome P450 family 24 subfamily A member 1 [Source:HGNC Symbol;Acc:HGNC:2602]
20	54139296	54141381	2086	WT_un_S5_peak_5011a	86	6.02131	8.60744	5.05654	175	Distal Intergenic	54154370	54157298	2929	-	ENSG00000019186	ENST00000460643	15917	CYP24A1	cytochrome P450 family 24 subfamily A member 1 [Source:HGNC Symbol;Acc:HGNC:2602]
20	54139296	54141381	2086	WT_un_S5_peak_5011b	54	4.55817	5.42044	2.14934	563	Distal Intergenic	54154370	54157298	2929	-	ENSG00000019186	ENST00000460643	15917	CYP24A1	cytochrome P450 family 24 subfamily A member 1 [Source:HGNC Symbol;Acc:HGNC:2602]
20	54139296	54141381	2086	WT_un_S5_peak_5011c	109	7.11867	10.9254	7.24635	947	Distal Intergenic	54154370	54157298	2929	-	ENSG00000019186	ENST00000460643	15917	CYP24A1	cytochrome P450 family 24 subfamily A member 1 [Source:HGNC Symbol;Acc:HGNC:2602]
20	54139296	54141381	2086	WT_un_S5_peak_5011d	59	4.94817	5.94877	2.6174	1417	Distal Intergenic	54154370	54157298	2929	-	ENSG00000019186	ENST00000460643	15917	CYP24A1	cytochrome P450 family 24 subfamily A member 1 [Source:HGNC Symbol;Acc:HGNC:2602]
8	48919724	48920639	916	WT_un_S5_peak_7892	40	3.5795	4.07966	0.98433	444	Promoter (<=1kb)	48917598	48921429	3832	-	ENSG00000019549	ENST00000020945	790	SNAI2	snail family transcriptional repressor 2 [Source:HGNC Symbol;Acc:HGNC:11094]
8	48921133	48921877	745	WT_un_S5_peak_7893	207	10.7005	20.7974	16.7366	236	Promoter (<=1kb)	48917598	48921429	3832	-	ENSG00000019549	ENST00000020945	0	SNAI2	snail family transcriptional repressor 2 [Source:HGNC Symbol;Acc:HGNC:11094]
14	54565821	54566672	852	WT_un_S5_peak_2604a	167	7.69903	16.7002	12.7664	365	Promoter (<=1kb)	54566117	54567910	1794	+	ENSG00000020577	ENST00000673751	0	SAMD4A	sterile alpha motif domain containing 4A [Source:HGNC Symbol;Acc:HGNC:23023]
14	54565821	54566672	852	WT_un_S5_peak_2604b	31	2.44778	3.15615	0.23813	791	Promoter (<=1kb)	54566117	54567910	1794	+	ENSG00000020577	ENST00000673751	0	SAMD4A	sterile alpha motif domain containing 4A [Source:HGNC Symbol;Acc:HGNC:23023]
14	54566942	54567604	663	WT_un_S5_peak_2605a	47	3.26588	4.73444	1.54742	109	Promoter (<=1kb)	54567128	54793312	226185	+	ENSG00000020577	ENST00000554335	0	SAMD4A	sterile alpha motif domain containing 4A [Source:HGNC Symbol;Acc:HGNC:23023]
14	54566942	54567604	663	WT_un_S5_peak_2605b	35	2.81625	3.53412	0.53357	499	Promoter (<=1kb)	54567128	54793312	226185	+	ENSG00000020577	ENST00000554335	0	SAMD4A	sterile alpha motif domain containing 4A [Source:HGNC Symbol;Acc:HGNC:23023]
14	54572610	54573370	761	WT_un_S5_peak_2606	38	3.7781	3.88541	0.82322	683	Intron (ENST00000554335/ENSG00000020577, intron 2 of 12)	54567632	54703867	136236	+	ENSG00000020577	ENST00000555112	4978	SAMD4A	sterile alpha motif domain containing 4A [Source:HGNC Symbol;Acc:HGNC:23023]
14	54576145	54576413	269	WT_un_S5_peak_2607	35	3.46081	3.53919	0.53357	132	Intron (ENST00000554335/ENSG00000020577, intron 2 of 12)	54567632	54703867	136236	+	ENSG00000020577	ENST00000555112	8513	SAMD4A	sterile alpha motif domain containing 4A [Source:HGNC Symbol;Acc:HGNC:23023]
14	54576713	54577052	340	WT_un_S5_peak_2608	24	2.89517	2.43654	0	300	Intron (ENST00000554335/ENSG00000020577, intron 2 of 12)	54567632	54703867	136236	+	ENSG00000020577	ENST00000555112	9081	SAMD4A	sterile alpha motif domain containing 4A [Source:HGNC Symbol;Acc:HGNC:23023]
14	54652369	54653117	749	WT_un_S5_peak_2609	40	3.5795	4.07966	0.98433	126	Promoter (<=1kb)	54652683	54702396	49714	+	ENSG00000020577	ENST00000555091	0	SAMD4A	sterile alpha motif domain containing 4A [Source:HGNC Symbol;Acc:HGNC:23023]
14	54772978	54773428	451	WT_un_S5_peak_2610	32	3.23733	3.22608	0.28631	169	Promoter (1-2kb)	54774962	54789128	14167	+	ENSG00000020577	ENST00000556069	-1534	SAMD4A	sterile alpha motif domain containing 4A [Source:HGNC Symbol;Acc:HGNC:23023]
11	94493521	94494290	770	WT_un_S5_peak_1725a	46	4.00398	4.61477	1.43357	155	Promoter (<=1kb)	94415570	94493844	78275	-	ENSG00000020922	ENST00000323929	0	MRE11	MRE11 homolog, double strand break repair nuclease [Source:HGNC Symbol;Acc:HGNC:7230]
11	94493521	94494290	770	WT_un_S5_peak_1725b	35	2.81625	3.53412	0.53357	655	Promoter (<=1kb)	94415570	94493844	78275	-	ENSG00000020922	ENST00000323929	0	MRE11	MRE11 homolog, double strand break repair nuclease [Source:HGNC Symbol;Acc:HGNC:7230]
14	79278819	79280001	1183	WT_un_S5_peak_2692	90	6.31683	9.08008	5.50262	495	Promoter (<=1kb)	79279339	79862478	583140	+	ENSG00000021645	ENST00000557594	0	NRXN3	neurexin 3 [Source:HGNC Symbol;Acc:HGNC:8010]
15	34969430	34969814	385	WT_un_S5_peak_2782	127	6.92744	12.7267	8.95034	206	Promoter (<=1kb)	34851782	34969742	117961	-	ENSG00000021776	ENST00000156471	0	AQR	aquarius intron-binding spliceosomal factor [Source:HGNC Symbol;Acc:HGNC:29513]
20	56468028	56468879	852	WT_un_S5_peak_5015	46	4.05519	4.68824	1.50407	321	Promoter (<=1kb)	56468585	56518886	50302	+	ENSG00000022277	ENST00000023939	0	RTF2	replication termination factor 2 [Source:HGNC Symbol;Acc:HGNC:15890]
11	506455	507007	553	WT_un_S5_peak_1246	33	2.88123	3.36237	0.40047	146	Promoter (<=1kb)	494513	506821	12309	-	ENSG00000023191	ENST00000397614	0	RNH1	ribonuclease/angiogenin inhibitor 1 [Source:HGNC Symbol;Acc:HGNC:10074]
8	52713500	52713821	322	WT_un_S5_peak_7901	47	3.57392	4.79015	1.59279	174	Promoter (<=1kb)	52622459	52714423	91965	-	ENSG00000023287	ENST00000435644	602	RB1CC1	RB1 inducible coiled-coil 1 [Source:HGNC Symbol;Acc:HGNC:15574]
8	52714260	52715190	931	WT_un_S5_peak_7902	106	6.14206	10.652	6.99254	229	Promoter (<=1kb)	52622458	52714435	91978	-	ENSG00000023287	ENST00000025008	0	RB1CC1	RB1 inducible coiled-coil 1 [Source:HGNC Symbol;Acc:HGNC:15574]
9	100098701	100099471	771	WT_un_S5_peak_8393	47	4.10774	4.76379	1.57115	246	Promoter (<=1kb)	99979185	100099000	119816	-	ENSG00000023318	ENST00000262455	0	ERP44	endoplasmic reticulum protein 44 [Source:HGNC Symbol;Acc:HGNC:18311]
1	193105137	193105445	309	WT_un_S5_peak_721	47	3.0742	4.70046	1.51522	144	Promoter (<=1kb)	193090866	193105433	14568	-	ENSG00000023572	ENST00000608166	0	GLRX2	glutaredoxin 2 [Source:HGNC Symbol;Acc:HGNC:16065]
12	15911199	15911650	452	WT_un_S5_peak_1917	58	4.21122	5.86499	2.55229	241	Promoter (<=1kb)	15911302	16036292	124991	+	ENSG00000023697	ENST00000526521	0	DERA	deoxyribose-phosphate aldolase [Source:HGNC Symbol;Acc:HGNC:24269]
12	15882133	15883152	1020	WT_un_S5_peak_1916	98	6.41522	9.81349	6.1887	177	Promoter (<=1kb)	15882387	15903478	21092	+	ENSG00000023734	ENST00000419869	0	STRAP	serine/threonine kinase receptor associated protein [Source:HGNC Symbol;Acc:HGNC:30796]
10	99779946	99780472	527	WT_un_S5_peak_1151	32	3.23733	3.22608	0.28631	208	Promoter (2-3kb)	99782640	99794348	11709	+	ENSG00000023839	ENST00000648689	-2168	ABCC2	ATP binding cassette subfamily C member 2 [Source:HGNC Symbol;Acc:HGNC:53]
6	42563893	42564585	693	WT_un_S5_peak_7099	56	4.13911	5.68722	2.39319	197	Promoter (<=1kb)	42564029	42693505	129477	+	ENSG00000024048	ENST00000372899	0	UBR2	ubiquitin protein ligase E3 component n-recognin 2 [Source:HGNC Symbol;Acc:HGNC:21289]
1	68496783	68497265	483	WT_un_S5_peak_320	49	4.22019	4.92356	1.71247	253	Promoter (<=1kb)	68474152	68497082	22931	-	ENSG00000024526	ENST00000456315	0	DEPDC1	DEP domain containing 1 [Source:HGNC Symbol;Acc:HGNC:22949]
11	47248601	47249022	422	WT_un_S5_peak_1432	30	2.85629	3.02283	0.12613	196	Promoter (<=1kb)	47248916	47268812	19897	+	ENSG00000025434	ENST00000395397	0	NR1H3	nuclear receptor subfamily 1 group H member 3 [Source:HGNC Symbol;Acc:HGNC:7966]
20	44960227	44960523	297	WT_un_S5_peak_4957	31	3.15976	3.11909	0.2036	177	Promoter (<=1kb)	44942130	44960397	18268	-	ENSG00000025772	ENST00000372813	0	TOMM34	translocase of outer mitochondrial membrane 34 [Source:HGNC Symbol;Acc:HGNC:15746]
10	17228095	17236194	8100	WT_un_S5_peak_948a	97	6.75288	9.74924	6.13049	368	Promoter (<=1kb)	17228241	17237593	9353	+	ENSG00000026025	ENST00000544301	0	VIM	vimentin [Source:HGNC Symbol;Acc:HGNC:12692]
10	17228095	17236194	8100	WT_un_S5_peak_948b	113	7.34334	11.3449	7.63533	674	Promoter (<=1kb)	17228241	17237593	9353	+	ENSG00000026025	ENST00000544301	0	VIM	vimentin [Source:HGNC Symbol;Acc:HGNC:12692]
10	17228095	17236194	8100	WT_un_S5_peak_948c	455	18.9416	45.5244	40.9718	1335	Promoter (<=1kb)	17228241	17237593	9353	+	ENSG00000026025	ENST00000544301	0	VIM	vimentin [Source:HGNC Symbol;Acc:HGNC:12692]
10	17228095	17236194	8100	WT_un_S5_peak_948d	93	5.35178	9.31879	5.72445	1919	Promoter (<=1kb)	17228241	17237593	9353	+	ENSG00000026025	ENST00000544301	0	VIM	vimentin [Source:HGNC Symbol;Acc:HGNC:12692]
10	17228095	17236194	8100	WT_un_S5_peak_948e	172	10.045	17.2452	13.2916	2263	Promoter (<=1kb)	17228241	17237593	9353	+	ENSG00000026025	ENST00000544301	0	VIM	vimentin [Source:HGNC Symbol;Acc:HGNC:12692]
10	17228095	17236194	8100	WT_un_S5_peak_948f	121	7.85024	12.1335	8.38243	2701	Promoter (<=1kb)	17228241	17237593	9353	+	ENSG00000026025	ENST00000544301	0	VIM	vimentin [Source:HGNC Symbol;Acc:HGNC:12692]
10	17228095	17236194	8100	WT_un_S5_peak_948g	86	6.02131	8.60744	5.05654	3307	Promoter (<=1kb)	17228241	17237593	9353	+	ENSG00000026025	ENST00000544301	0	VIM	vimentin [Source:HGNC Symbol;Acc:HGNC:12692]
10	17228095	17236194	8100	WT_un_S5_peak_948h	64	4.92395	6.43923	3.05901	3969	Promoter (<=1kb)	17228241	17237593	9353	+	ENSG00000026025	ENST00000544301	0	VIM	vimentin [Source:HGNC Symbol;Acc:HGNC:12692]
10	17228095	17236194	8100	WT_un_S5_peak_948i	90	6.31683	9.08008	5.50262	4390	Promoter (<=1kb)	17228241	17237593	9353	+	ENSG00000026025	ENST00000544301	0	VIM	vimentin [Source:HGNC Symbol;Acc:HGNC:12692]
10	17228095	17236194	8100	WT_un_S5_peak_948j	132	8.06343	13.2506	9.45305	5232	Promoter (<=1kb)	17228241	17237593	9353	+	ENSG00000026025	ENST00000544301	0	VIM	vimentin [Source:HGNC Symbol;Acc:HGNC:12692]
10	17228095	17236194	8100	WT_un_S5_peak_948k	75	5.65553	7.50295	4.04628	5950	Promoter (<=1kb)	17228241	17237593	9353	+	ENSG00000026025	ENST00000544301	0	VIM	vimentin [Source:HGNC Symbol;Acc:HGNC:12692]
10	17228095	17236194	8100	WT_un_S5_peak_948l	86	6.02131	8.60744	5.05654	6646	Promoter (<=1kb)	17228241	17237593	9353	+	ENSG00000026025	ENST00000544301	0	VIM	vimentin [Source:HGNC Symbol;Acc:HGNC:12692]
10	17228095	17236194	8100	WT_un_S5_peak_948m	35	3.46081	3.53919	0.53357	7638	Promoter (<=1kb)	17228241	17237593	9353	+	ENSG00000026025	ENST00000544301	0	VIM	vimentin [Source:HGNC Symbol;Acc:HGNC:12692]
10	17228095	17236194	8100	WT_un_S5_peak_948n	64	5.28974	6.43923	3.05901	7934	Promoter (<=1kb)	17228241	17237593	9353	+	ENSG00000026025	ENST00000544301	0	VIM	vimentin [Source:HGNC Symbol;Acc:HGNC:12692]
11	35138771	35141085	2315	WT_un_S5_peak_1404a	330	15.5318	33.0535	28.7216	507	Promoter (<=1kb)	35138882	35177110	38229	+	ENSG00000026508	ENST00000526025	0	CD44	CD44 molecule (Indian blood group) [Source:HGNC Symbol;Acc:HGNC:1681]
11	35138771	35141085	2315	WT_un_S5_peak_1404b	64	4.92395	6.43923	3.05901	2024	Promoter (<=1kb)	35138882	35177110	38229	+	ENSG00000026508	ENST00000526025	0	CD44	CD44 molecule (Indian blood group) [Source:HGNC Symbol;Acc:HGNC:1681]
11	35141816	35142131	316	WT_un_S5_peak_1405	40	3.63653	4.09083	0.99096	133	Promoter (2-3kb)	35139306	35223320	84015	+	ENSG00000026508	ENST00000442151	2510	CD44	CD44 molecule (Indian blood group) [Source:HGNC Symbol;Acc:HGNC:1681]
11	35142349	35143759	1411	WT_un_S5_peak_1406	40	3.5795	4.07966	0.98433	183	Intron (ENST00000526025/ENSG00000026508, intron 1 of 1)	35139306	35223320	84015	+	ENSG00000026508	ENST00000442151	3043	CD44	CD44 molecule (Indian blood group) [Source:HGNC Symbol;Acc:HGNC:1681]
11	35144008	35144322	315	WT_un_S5_peak_1407	40	3.5795	4.07966	0.98433	149	Intron (ENST00000526025/ENSG00000026508, intron 1 of 1)	35139306	35223320	84015	+	ENSG00000026508	ENST00000442151	4702	CD44	CD44 molecule (Indian blood group) [Source:HGNC Symbol;Acc:HGNC:1681]
13	23888670	23889546	877	WT_un_S5_peak_2316	59	4.606	5.94877	2.6174	477	Promoter (<=1kb)	23730189	23889400	159212	-	ENSG00000027001	ENST00000382172	0	MIPEP	mitochondrial intermediate peptidase [Source:HGNC Symbol;Acc:HGNC:7104]
14	61178443	61178896	454	WT_un_S5_peak_2629	34	3.46391	3.46542	0.49354	147	Distal Intergenic	61187559	61530584	343026	+	ENSG00000027075	ENST00000555185	-8663	PRKCH	protein kinase C eta [Source:HGNC Symbol;Acc:HGNC:9403]
6	137219060	137219479	420	WT_un_S5_peak_7334	44	4.19238	4.45165	1.28046	208	Promoter (<=1kb)	137197485	137219312	21828	-	ENSG00000027697	ENST00000643119	0	IFNGR1	interferon gamma receptor 1 [Source:HGNC Symbol;Acc:HGNC:5439]
2	58046642	58047089	448	WT_un_S5_peak_4388	44	4.19238	4.45165	1.28046	176	Promoter (<=1kb)	58046642	58159920	113279	+	ENSG00000028116	ENST00000412104	0	VRK2	VRK serine/threonine kinase 2 [Source:HGNC Symbol;Acc:HGNC:12719]
12	95217593	95218231	639	WT_un_S5_peak_2193	36	3.07067	3.62443	0.59626	422	Promoter (<=1kb)	95217746	95257181	39436	+	ENSG00000028203	ENST00000549589	0	VEZT	vezatin, adherens junctions transmembrane protein [Source:HGNC Symbol;Acc:HGNC:18258]
5	862105	862500	396	WT_un_S5_peak_6203	38	3.7781	3.88541	0.82322	162	Intron (ENST00000493082/ENSG00000028310, intron 2 of 2)	863741	866501	2761	-	ENSG00000028310	ENST00000497410	4001	BRD9	bromodomain containing 9 [Source:HGNC Symbol;Acc:HGNC:25818]
5	892423	893064	642	WT_un_S5_peak_6204a	29	2.64517	2.95763	0.06978	184	Promoter (<=1kb)	863741	892800	29060	-	ENSG00000028310	ENST00000495265	0	BRD9	bromodomain containing 9 [Source:HGNC Symbol;Acc:HGNC:25818]
5	892423	893064	642	WT_un_S5_peak_6204b	24	2.47408	2.41987	0	470	Promoter (<=1kb)	863741	892800	29060	-	ENSG00000028310	ENST00000495265	0	BRD9	bromodomain containing 9 [Source:HGNC Symbol;Acc:HGNC:25818]
6	133952434	133952705	272	WT_un_S5_peak_7318	35	3.46081	3.53919	0.53357	156	Promoter (<=1kb)	133952286	133980260	27975	+	ENSG00000028839	ENST00000457715	148	TBPL1	TATA-box binding protein like 1 [Source:HGNC Symbol;Acc:HGNC:11589]
6	133952940	133953447	508	WT_un_S5_peak_7319	156	8.72271	15.6758	11.779	283	Promoter (<=1kb)	133953195	133984723	31529	+	ENSG00000028839	ENST00000367871	0	TBPL1	TATA-box binding protein like 1 [Source:HGNC Symbol;Acc:HGNC:11589]
6	136281425	136281784	360	WT_un_S5_peak_7331	44	3.82659	4.45165	1.28046	131	Promoter (1-2kb)	136261110	136279866	18757	-	ENSG00000029363	ENST00000392348	-1559	BCLAF1	BCL2 associated transcription factor 1 [Source:HGNC Symbol;Acc:HGNC:16863]
6	136288866	136290843	1978	WT_un_S5_peak_7332a	105	6.49248	10.523	6.86893	236	Promoter (<=1kb)	136256627	136289846	33220	-	ENSG00000029363	ENST00000531224	0	BCLAF1	BCL2 associated transcription factor 1 [Source:HGNC Symbol;Acc:HGNC:16863]
6	136288866	136290843	1978	WT_un_S5_peak_7332b	315	12.1951	31.578	27.2757	988	Promoter (<=1kb)	136256627	136289846	33220	-	ENSG00000029363	ENST00000531224	0	BCLAF1	BCL2 associated transcription factor 1 [Source:HGNC Symbol;Acc:HGNC:16863]
14	69397983	69398505	523	WT_un_S5_peak_2660	107	6.5548	10.7319	7.06728	335	Promoter (<=1kb)	69398015	69453300	55286	+	ENSG00000029364	ENST00000556125	0	SLC39A9	solute carrier family 39 member 9 [Source:HGNC Symbol;Acc:HGNC:20182]
6	155314177	155314662	486	WT_un_S5_peak_7380	44	4.19238	4.45165	1.28046	333	Promoter (<=1kb)	155256134	155314484	58351	-	ENSG00000029639	ENST00000367166	0	TFB1M	transcription factor B1, mitochondrial [Source:HGNC Symbol;Acc:HGNC:17037]
11	47848138	47848417	280	WT_un_S5_peak_1437	23	2.61444	2.34354	0	118	Promoter (<=1kb)	47778237	47848313	70077	-	ENSG00000030066	ENST00000530326	0	NUP160	nucleoporin 160 [Source:HGNC Symbol;Acc:HGNC:18017]
17	44345240	44345508	269	WT_un_S5_peak_3420	35	3.54822	3.57756	0.56548	44	Promoter (<=1kb)	44345246	44349894	4649	+	ENSG00000030582	ENST00000588170	0	GRN	granulin precursor [Source:HGNC Symbol;Acc:HGNC:4601]
5	138032696	138033281	586	WT_un_S5_peak_6667	35	3.26231	3.55932	0.55019	446	Promoter (<=1kb)	137937960	138033031	95072	-	ENSG00000031003	ENST00000033079	0	FAM13B	family with sequence similarity 13 member B [Source:HGNC Symbol;Acc:HGNC:1335]
6	49462837	49463608	772	WT_un_S5_peak_7142	67	5.09567	6.71822	3.31136	543	Promoter (<=1kb)	49463370	49493107	29738	+	ENSG00000031691	ENST00000335783	0	CENPQ	centromere protein Q [Source:HGNC Symbol;Acc:HGNC:21347]
6	49463911	49464417	507	WT_un_S5_peak_7143	24	2.89517	2.43654	0	367	Promoter (<=1kb)	49463370	49493107	29738	+	ENSG00000031691	ENST00000335783	541	CENPQ	centromere protein Q [Source:HGNC Symbol;Acc:HGNC:21347]
6	49465567	49465835	269	WT_un_S5_peak_7144	31	3.20179	3.17697	0.25446	246	Promoter (2-3kb)	49463370	49493107	29738	+	ENSG00000031691	ENST00000335783	2197	CENPQ	centromere protein Q [Source:HGNC Symbol;Acc:HGNC:21347]
1	109213784	109215229	1446	WT_un_S5_peak_447a	58	4.51201	5.8007	2.49471	131	Promoter (<=1kb)	109213918	109238182	24265	+	ENSG00000031698	ENST00000234677	0	SARS1	seryl-tRNA synthetase 1 [Source:HGNC Symbol;Acc:HGNC:10537]
1	109213784	109215229	1446	WT_un_S5_peak_447b	62	4.78655	6.20573	2.85569	431	Promoter (<=1kb)	109213918	109238182	24265	+	ENSG00000031698	ENST00000234677	0	SARS1	seryl-tRNA synthetase 1 [Source:HGNC Symbol;Acc:HGNC:10537]
1	109213784	109215229	1446	WT_un_S5_peak_447c	49	4.26916	4.99215	1.77076	1056	Promoter (<=1kb)	109213918	109238182	24265	+	ENSG00000031698	ENST00000234677	0	SARS1	seryl-tRNA synthetase 1 [Source:HGNC Symbol;Acc:HGNC:10537]
13	20567166	20567486	321	WT_un_S5_peak_2306	35	3.1997	3.52078	0.53357	160	Promoter (<=1kb)	20567166	20583016	15851	+	ENSG00000032742	ENST00000389373	0	IFT88	intraflagellar transport 88 [Source:HGNC Symbol;Acc:HGNC:20606]
12	122500640	122501120	481	WT_un_S5_peak_2287	90	5.95245	9.08912	5.51102	261	Promoter (<=1kb)	122471599	122501073	29475	-	ENSG00000033030	ENST00000672018	0	ZCCHC8	zinc finger CCHC-type containing 8 [Source:HGNC Symbol;Acc:HGNC:25265]
7	151232350	151232707	358	WT_un_S5_peak_7730	53	3.34793	5.31046	2.05735	204	Promoter (<=1kb)	151232489	151235269	2781	+	ENSG00000033100	ENST00000482173	0	CHPF2	chondroitin polymerizing factor 2 [Source:HGNC Symbol;Acc:HGNC:29270]
14	65411799	65412072	274	WT_un_S5_peak_2640	40	3.92167	4.07966	0.98433	210	Promoter (<=1kb)	65411863	65561652	149790	+	ENSG00000033170	ENST00000556518	0	FUT8	fucosyltransferase 8 [Source:HGNC Symbol;Acc:HGNC:4019]
17	42519669	42520579	911	WT_un_S5_peak_3391	38	3.47699	3.86426	0.81512	723	Promoter (<=1kb)	42520335	42522577	2243	+	ENSG00000033627	ENST00000587797	0	ATP6V0A1	ATPase H+ transporting V0 subunit a1 [Source:HGNC Symbol;Acc:HGNC:865]
3	27484038	27484668	631	WT_un_S5_peak_5421	179	8.41739	17.9802	14.0036	257	Promoter (<=1kb)	27372721	27484420	111700	-	ENSG00000033867	ENST00000425128	0	SLC4A7	solute carrier family 4 member 7 [Source:HGNC Symbol;Acc:HGNC:11033]
17	21284443	21285166	724	WT_un_S5_peak_3323	227	11.2521	22.7572	18.6436	293	Promoter (<=1kb)	21284672	21315213	30542	+	ENSG00000034152	ENST00000395491	0	MAP2K3	mitogen-activated protein kinase kinase 3 [Source:HGNC Symbol;Acc:HGNC:6843]
17	21286204	21286789	586	WT_un_S5_peak_3324	50	3.98311	5.08049	1.8432	191	Promoter (1-2kb)	21288036	21303234	15199	+	ENSG00000034152	ENST00000526076	-1247	MAP2K3	mitogen-activated protein kinase kinase 3 [Source:HGNC Symbol;Acc:HGNC:6843]
2	84905363	84909934	4572	WT_un_S5_peak_4425a	585	18.3375	58.5539	53.7953	394	Promoter (<=1kb)	84905656	84906671	1016	+	ENSG00000034510	ENST00000233143	0	TMSB10	thymosin beta 10 [Source:HGNC Symbol;Acc:HGNC:11879]
2	84905363	84909934	4572	WT_un_S5_peak_4425b	43	3.5241	4.31451	1.1925	880	Promoter (<=1kb)	84905656	84906671	1016	+	ENSG00000034510	ENST00000233143	0	TMSB10	thymosin beta 10 [Source:HGNC Symbol;Acc:HGNC:11879]
2	84905363	84909934	4572	WT_un_S5_peak_4425c	68	4.83308	6.82947	3.41799	1282	Promoter (<=1kb)	84905656	84906671	1016	+	ENSG00000034510	ENST00000233143	0	TMSB10	thymosin beta 10 [Source:HGNC Symbol;Acc:HGNC:11879]
2	84905363	84909934	4572	WT_un_S5_peak_4425d	88	5.46923	8.86613	5.30023	1653	Promoter (<=1kb)	84905656	84906671	1016	+	ENSG00000034510	ENST00000233143	0	TMSB10	thymosin beta 10 [Source:HGNC Symbol;Acc:HGNC:11879]
2	84905363	84909934	4572	WT_un_S5_peak_4425e	113	6.46603	11.3498	7.63985	2082	Promoter (<=1kb)	84905656	84906671	1016	+	ENSG00000034510	ENST00000233143	0	TMSB10	thymosin beta 10 [Source:HGNC Symbol;Acc:HGNC:11879]
2	84905363	84909934	4572	WT_un_S5_peak_4425f	50	3.755	5.08049	1.8432	2947	Promoter (<=1kb)	84905656	84906671	1016	+	ENSG00000034510	ENST00000233143	0	TMSB10	thymosin beta 10 [Source:HGNC Symbol;Acc:HGNC:11879]
2	84905363	84909934	4572	WT_un_S5_peak_4425g	50	3.98311	5.08049	1.8432	3259	Promoter (<=1kb)	84905656	84906671	1016	+	ENSG00000034510	ENST00000233143	0	TMSB10	thymosin beta 10 [Source:HGNC Symbol;Acc:HGNC:11879]
2	84905363	84909934	4572	WT_un_S5_peak_4425h	41	2.93733	4.11731	1.01378	3738	Promoter (<=1kb)	84905656	84906671	1016	+	ENSG00000034510	ENST00000233143	0	TMSB10	thymosin beta 10 [Source:HGNC Symbol;Acc:HGNC:11879]
2	84905363	84909934	4572	WT_un_S5_peak_4425i	24	2.303	2.41987	0	4029	Promoter (<=1kb)	84905656	84906671	1016	+	ENSG00000034510	ENST00000233143	0	TMSB10	thymosin beta 10 [Source:HGNC Symbol;Acc:HGNC:11879]
3	131026416	131026927	512	WT_un_S5_peak_5711	59	4.94817	5.94877	2.6174	189	Promoter (<=1kb)	131013875	131026792	12918	-	ENSG00000034533	ENST00000514044	0	ASTE1	asteroid homolog 1 [Source:HGNC Symbol;Acc:HGNC:25021]
8	100309108	100310615	1508	WT_un_S5_peak_8057a	93	5.35178	9.31879	5.72445	570	Promoter (<=1kb)	100257067	100309953	52887	-	ENSG00000034677	ENST00000341084	0	RNF19A	ring finger protein 19A, RBR E3 ubiquitin protein ligase [Source:HGNC Symbol;Acc:HGNC:13432]
8	100309108	100310615	1508	WT_un_S5_peak_8057b	116	6.28107	11.6317	7.91458	841	Promoter (<=1kb)	100257067	100309953	52887	-	ENSG00000034677	ENST00000341084	0	RNF19A	ring finger protein 19A, RBR E3 ubiquitin protein ligase [Source:HGNC Symbol;Acc:HGNC:13432]
6	143450566	143451041	476	WT_un_S5_peak_7354	59	4.606	5.94877	2.6174	273	Promoter (<=1kb)	143450805	143490616	39812	+	ENSG00000034693	ENST00000367591	0	PEX3	peroxisomal biogenesis factor 3 [Source:HGNC Symbol;Acc:HGNC:8858]
10	73997834	73999119	1286	WT_un_S5_peak_1085a	303	11.967	30.322	26.0438	335	Promoter (<=1kb)	73998114	74118048	119935	+	ENSG00000035403	ENST00000624354	0	VCL	vinculin [Source:HGNC Symbol;Acc:HGNC:12665]
10	73997834	73999119	1286	WT_un_S5_peak_1085b	24	2.303	2.41987	0	1223	Promoter (<=1kb)	73998114	74118048	119935	+	ENSG00000035403	ENST00000624354	0	VCL	vinculin [Source:HGNC Symbol;Acc:HGNC:12665]
10	73999324	73999670	347	WT_un_S5_peak_1086	62	4.76753	6.24044	2.88919	188	Promoter (1-2kb)	73998116	74120169	122054	+	ENSG00000035403	ENST00000211998	1208	VCL	vinculin [Source:HGNC Symbol;Acc:HGNC:12665]
5	60699633	60700375	743	WT_un_S5_peak_6388	106	6.8958	10.6552	6.99477	490	Promoter (<=1kb)	60596912	60700166	103255	-	ENSG00000035499	ENST00000265036	0	DEPDC1B	DEP domain containing 1B [Source:HGNC Symbol;Acc:HGNC:24902]
1	244451641	244452100	460	WT_un_S5_peak_895	199	10.7765	19.9471	15.9116	207	Promoter (<=1kb)	244408494	244451909	43416	-	ENSG00000035687	ENST00000366535	0	ADSS2	adenylosuccinate synthase 2 [Source:HGNC Symbol;Acc:HGNC:292]
17	78883835	78884164	330	WT_un_S5_peak_3626	36	3.33086	3.65675	0.62484	119	Intron (ENST00000536189/ENSG00000035862, intron 1 of 4)	78852977	78874150	21174	-	ENSG00000035862	ENST00000585421	-9685	TIMP2	TIMP metallopeptidase inhibitor 2 [Source:HGNC Symbol;Acc:HGNC:11821]
17	78925189	78925622	434	WT_un_S5_peak_3627	95	3.85781	9.529	5.92921	180	Promoter (<=1kb)	78852977	78925387	72411	-	ENSG00000035862	ENST00000262768	0	TIMP2	TIMP metallopeptidase inhibitor 2 [Source:HGNC Symbol;Acc:HGNC:11821]
17	78934739	78935611	873	WT_un_S5_peak_3628	52	3.83581	5.20909	1.96255	690	Distal Intergenic	78852977	78925387	72411	-	ENSG00000035862	ENST00000262768	-9352	TIMP2	TIMP metallopeptidase inhibitor 2 [Source:HGNC Symbol;Acc:HGNC:11821]
1	77682386	77683006	621	WT_un_S5_peak_336	32	3.07259	3.28916	0.34417	124	Promoter (<=1kb)	77562416	77682658	120243	-	ENSG00000036549	ENST00000370801	0	ZZZ3	zinc finger ZZ-type containing 3 [Source:HGNC Symbol;Acc:HGNC:24523]
5	172958674	172959918	1245	WT_un_S5_peak_6799a	36	3.09286	3.66591	0.63308	214	Promoter (<=1kb)	172958729	172969716	10988	+	ENSG00000037241	ENST00000519974	0	RPL26L1	ribosomal protein L26 like 1 [Source:HGNC Symbol;Acc:HGNC:17050]
5	172958674	172959918	1245	WT_un_S5_peak_6799b	92	4.86925	9.25272	5.66888	657	Promoter (<=1kb)	172958729	172969716	10988	+	ENSG00000037241	ENST00000519974	0	RPL26L1	ribosomal protein L26 like 1 [Source:HGNC Symbol;Acc:HGNC:17050]
5	6632685	6633024	340	WT_un_S5_peak_6217	35	2.81625	3.53412	0.53357	193	Promoter (<=1kb)	6599569	6633042	33474	-	ENSG00000037474	ENST00000506139	18	NSUN2	NOP2/Sun RNA methyltransferase 2 [Source:HGNC Symbol;Acc:HGNC:25994]
5	154038515	154039224	710	WT_un_S5_peak_6739	51	4.39231	5.17643	1.93189	189	Promoter (<=1kb)	154038959	154054052	15094	+	ENSG00000037749	ENST00000439768	0	MFAP3	microfibril associated protein 3 [Source:HGNC Symbol;Acc:HGNC:7034]
12	57771650	57772321	672	WT_un_S5_peak_2089	79	5.97467	7.99793	4.48953	340	Promoter (<=1kb)	57768471	57772105	3635	-	ENSG00000037897	ENST00000324871	0	METTL1	methyltransferase like 1 [Source:HGNC Symbol;Acc:HGNC:7030]
4	25160371	25160792	422	WT_un_S5_peak_6004	66	5.09666	6.66465	3.27049	229	Promoter (<=1kb)	25160663	25277306	116644	+	ENSG00000038210	ENST00000512921	0	PI4K2B	phosphatidylinositol 4-kinase type 2 beta [Source:HGNC Symbol;Acc:HGNC:18215]
4	13627719	13628273	555	WT_un_S5_peak_5987	31	2.95791	3.1253	0.20805	179	Promoter (<=1kb)	13568738	13627725	58988	-	ENSG00000038219	ENST00000040738	0	BOD1L1	biorientation of chromosomes in cell division 1 like 1 [Source:HGNC Symbol;Acc:HGNC:31792]
5	163505407	163505794	388	WT_un_S5_peak_6774	49	4.26383	4.98931	1.76911	176	Promoter (<=1kb)	163505584	163517630	12047	+	ENSG00000038274	ENST00000421814	0	MAT2B	methionine adenosyltransferase 2B [Source:HGNC Symbol;Acc:HGNC:6905]
4	165873089	165874438	1350	WT_un_S5_peak_6178a	59	4.606	5.94877	2.6174	205	Promoter (<=1kb)	165873237	166104457	231221	+	ENSG00000038295	ENST00000061240	0	TLL1	tolloid like 1 [Source:HGNC Symbol;Acc:HGNC:11843]
4	165873089	165874438	1350	WT_un_S5_peak_6178b	56	4.43738	5.69186	2.39319	922	Promoter (<=1kb)	165873237	166104457	231221	+	ENSG00000038295	ENST00000061240	0	TLL1	tolloid like 1 [Source:HGNC Symbol;Acc:HGNC:11843]
5	14144697	14145473	777	WT_un_S5_peak_6242	85	4.74682	8.538	5.0048	165	Promoter (<=1kb)	14143837	14508676	364840	+	ENSG00000038382	ENST00000512070	860	TRIO	trio Rho guanine nucleotide exchange factor [Source:HGNC Symbol;Acc:HGNC:12303]
5	14156516	14157219	704	WT_un_S5_peak_6243	29	3.04004	2.95539	0.06978	419	Intron (ENST00000344204/ENSG00000038382, intron 1 of 56)	14143837	14508676	364840	+	ENSG00000038382	ENST00000512070	12679	TRIO	trio Rho guanine nucleotide exchange factor [Source:HGNC Symbol;Acc:HGNC:12303]
5	14184826	14185123	298	WT_un_S5_peak_6244	33	3.34471	3.30737	0.35013	135	Promoter (1-2kb)	14183798	14399400	215603	+	ENSG00000038382	ENST00000509967	1028	TRIO	trio Rho guanine nucleotide exchange factor [Source:HGNC Symbol;Acc:HGNC:12303]
5	14185427	14185935	509	WT_un_S5_peak_6245	29	2.64517	2.95763	0.06978	183	Promoter (1-2kb)	14183798	14399400	215603	+	ENSG00000038382	ENST00000509967	1629	TRIO	trio Rho guanine nucleotide exchange factor [Source:HGNC Symbol;Acc:HGNC:12303]
5	14190135	14191081	947	WT_un_S5_peak_6246	40	3.5795	4.07966	0.98433	607	Intron (ENST00000344204/ENSG00000038382, intron 1 of 56)	14183798	14399400	215603	+	ENSG00000038382	ENST00000509967	6337	TRIO	trio Rho guanine nucleotide exchange factor [Source:HGNC Symbol;Acc:HGNC:12303]
5	14251747	14252085	339	WT_un_S5_peak_6247	23	2.82579	2.34975	0	114	Intron (ENST00000344204/ENSG00000038382, intron 1 of 56)	14290977	14297513	6537	+	ENSG00000038382	ENST00000504606	-38892	TRIO	trio Rho guanine nucleotide exchange factor [Source:HGNC Symbol;Acc:HGNC:12303]
5	14263733	14264001	269	WT_un_S5_peak_6248	32	3.2893	3.29821	0.35013	161	Intron (ENST00000344204/ENSG00000038382, intron 1 of 56)	14290977	14297513	6537	+	ENSG00000038382	ENST00000504606	-26976	TRIO	trio Rho guanine nucleotide exchange factor [Source:HGNC Symbol;Acc:HGNC:12303]
5	14264648	14266085	1438	WT_un_S5_peak_6249	87	6.08558	8.72862	5.16636	215	Intron (ENST00000344204/ENSG00000038382, intron 1 of 56)	14290977	14297513	6537	+	ENSG00000038382	ENST00000504606	-24892	TRIO	trio Rho guanine nucleotide exchange factor [Source:HGNC Symbol;Acc:HGNC:12303]
5	14266363	14266996	634	WT_un_S5_peak_6250	41	3.98462	4.16545	1.05527	428	Intron (ENST00000344204/ENSG00000038382, intron 1 of 56)	14290977	14297513	6537	+	ENSG00000038382	ENST00000504606	-23981	TRIO	trio Rho guanine nucleotide exchange factor [Source:HGNC Symbol;Acc:HGNC:12303]
5	14268271	14268659	389	WT_un_S5_peak_6251	44	3.82659	4.45165	1.28046	187	Intron (ENST00000344204/ENSG00000038382, intron 1 of 56)	14290977	14297513	6537	+	ENSG00000038382	ENST00000504606	-22318	TRIO	trio Rho guanine nucleotide exchange factor [Source:HGNC Symbol;Acc:HGNC:12303]
5	83471382	83471779	398	WT_un_S5_peak_6472	44	4.19238	4.45165	1.28046	253	Promoter (<=1kb)	83471618	83483604	11987	+	ENSG00000038427	ENST00000503923	0	VCAN	versican [Source:HGNC Symbol;Acc:HGNC:2464]
5	83471961	83472581	621	WT_un_S5_peak_6473	26	2.72923	2.69119	0	130	Promoter (<=1kb)	83471925	83580448	108524	+	ENSG00000038427	ENST00000502527	36	VCAN	versican [Source:HGNC Symbol;Acc:HGNC:2464]
5	83473104	83473591	488	WT_un_S5_peak_6474	38	3.44846	3.88541	0.82322	337	Promoter (1-2kb)	83471925	83580448	108524	+	ENSG00000038427	ENST00000502527	1179	VCAN	versican [Source:HGNC Symbol;Acc:HGNC:2464]
5	83473825	83474991	1167	WT_un_S5_peak_6475a	120	7.40414	12.0765	8.33825	509	Promoter (1-2kb)	83471925	83580448	108524	+	ENSG00000038427	ENST00000502527	1900	VCAN	versican [Source:HGNC Symbol;Acc:HGNC:2464]
5	83473825	83474991	1167	WT_un_S5_peak_6475b	101	6.659	10.1966	6.55518	883	Promoter (1-2kb)	83471925	83580448	108524	+	ENSG00000038427	ENST00000502527	1900	VCAN	versican [Source:HGNC Symbol;Acc:HGNC:2464]
5	83475501	83476017	517	WT_un_S5_peak_6476	40	3.92167	4.07966	0.98433	340	Intron (ENST00000503923/ENSG00000038427, intron 1 of 1)	83471925	83580448	108524	+	ENSG00000038427	ENST00000502527	3576	VCAN	versican [Source:HGNC Symbol;Acc:HGNC:2464]
8	16408886	16409312	427	WT_un_S5_peak_7797	26	2.72923	2.69119	0	206	Intron (ENST00000518026/ENSG00000038945, intron 2 of 5)	16368086	16383328	15243	-	ENSG00000038945	ENST00000517522	-25558	MSR1	macrophage scavenger receptor 1 [Source:HGNC Symbol;Acc:HGNC:7376]
5	55307531	55308099	569	WT_un_S5_peak_6365	59	4.30949	5.95321	2.61777	351	Promoter (<=1kb)	55307989	55425579	117591	+	ENSG00000039123	ENST00000230640	0	MTREX	Mtr4 exosome RNA helicase [Source:HGNC Symbol;Acc:HGNC:18734]
5	14011544	14011955	412	WT_un_S5_peak_6238	29	2.64517	2.95763	0.06978	166	Promoter (<=1kb)	13690328	14011818	321491	-	ENSG00000039139	ENST00000681290	0	DNAH5	dynein axonemal heavy chain 5 [Source:HGNC Symbol;Acc:HGNC:2950]
5	14035058	14035903	846	WT_un_S5_peak_6239a	59	4.606	5.94877	2.6174	263	Distal Intergenic	13690328	14011818	321491	-	ENSG00000039139	ENST00000681290	-23240	DNAH5	dynein axonemal heavy chain 5 [Source:HGNC Symbol;Acc:HGNC:2950]
5	14035058	14035903	846	WT_un_S5_peak_6239b	43	3.7859	4.31451	1.1925	682	Distal Intergenic	13690328	14011818	321491	-	ENSG00000039139	ENST00000681290	-23240	DNAH5	dynein axonemal heavy chain 5 [Source:HGNC Symbol;Acc:HGNC:2950]
5	14036331	14038205	1875	WT_un_S5_peak_6240a	120	7.40414	12.0765	8.33825	169	Distal Intergenic	13690328	14011818	321491	-	ENSG00000039139	ENST00000681290	-24513	DNAH5	dynein axonemal heavy chain 5 [Source:HGNC Symbol;Acc:HGNC:2950]
5	14036331	14038205	1875	WT_un_S5_peak_6240b	90	6.31683	9.08008	5.50262	643	Distal Intergenic	13690328	14011818	321491	-	ENSG00000039139	ENST00000681290	-24513	DNAH5	dynein axonemal heavy chain 5 [Source:HGNC Symbol;Acc:HGNC:2950]
5	14036331	14038205	1875	WT_un_S5_peak_6240c	64	5.28974	6.43923	3.05901	1070	Distal Intergenic	13690328	14011818	321491	-	ENSG00000039139	ENST00000681290	-24513	DNAH5	dynein axonemal heavy chain 5 [Source:HGNC Symbol;Acc:HGNC:2950]
5	14036331	14038205	1875	WT_un_S5_peak_6240d	26	3.09502	2.69119	0	1711	Distal Intergenic	13690328	14011818	321491	-	ENSG00000039139	ENST00000681290	-24513	DNAH5	dynein axonemal heavy chain 5 [Source:HGNC Symbol;Acc:HGNC:2950]
5	14038373	14038894	522	WT_un_S5_peak_6241	54	4.55817	5.42044	2.14934	214	Distal Intergenic	13690328	14011818	321491	-	ENSG00000039139	ENST00000681290	-26555	DNAH5	dynein axonemal heavy chain 5 [Source:HGNC Symbol;Acc:HGNC:2950]
5	80407680	80408385	706	WT_un_S5_peak_6459	74	5.28923	7.46621	4.01975	350	Promoter (<=1kb)	80408013	80479350	71338	+	ENSG00000039319	ENST00000338008	0	ZFYVE16	zinc finger FYVE-type containing 16 [Source:HGNC Symbol;Acc:HGNC:20756]
16	67530167	67530469	303	WT_un_S5_peak_3154	31	2.98577	3.16515	0.24505	166	Promoter (<=1kb)	67529791	67538996	9206	+	ENSG00000039523	ENST00000566920	376	RIPOR1	RHO family interacting cell polarization regulator 1 [Source:HGNC Symbol;Acc:HGNC:25836]
19	49867412	49868050	639	WT_un_S5_peak_4160	40	3.5795	4.07966	0.98433	483	Promoter (<=1kb)	49861204	49867555	6352	-	ENSG00000039650	ENST00000600910	0	PNKP	polynucleotide kinase 3'-phosphatase [Source:HGNC Symbol;Acc:HGNC:9154]
5	169583635	169584086	452	WT_un_S5_peak_6786	97	6.75288	9.74924	6.13049	258	Promoter (<=1kb)	169583636	169591148	7513	+	ENSG00000040275	ENST00000506574	0	SPDL1	spindle apparatus coiled-coil protein 1 [Source:HGNC Symbol;Acc:HGNC:26010]
5	169585354	169585622	269	WT_un_S5_peak_6787	23	2.45954	2.30424	0	79	Promoter (1-2kb)	169584029	169593493	9465	+	ENSG00000040275	ENST00000513795	1325	SPDL1	spindle apparatus coiled-coil protein 1 [Source:HGNC Symbol;Acc:HGNC:26010]
8	73458676	73459333	658	WT_un_S5_peak_7981	38	3.44846	3.88541	0.82322	394	Promoter (<=1kb)	73420959	73458787	37829	-	ENSG00000040341	ENST00000522818	0	STAU2	staufen double-stranded RNA binding protein 2 [Source:HGNC Symbol;Acc:HGNC:11371]
8	73459608	73460169	562	WT_un_S5_peak_7982	59	4.57128	5.95321	2.61777	335	Promoter (<=1kb)	73420959	73458787	37829	-	ENSG00000040341	ENST00000522818	-821	STAU2	staufen double-stranded RNA binding protein 2 [Source:HGNC Symbol;Acc:HGNC:11371]
8	73460691	73460959	269	WT_un_S5_peak_7983	23	2.49183	2.34975	0	250	Promoter (1-2kb)	73420959	73458787	37829	-	ENSG00000040341	ENST00000522818	-1904	STAU2	staufen double-stranded RNA binding protein 2 [Source:HGNC Symbol;Acc:HGNC:11371]
2	98546064	98546361	298	WT_un_S5_peak_4466	23	2.78918	2.30424	0	212	Exon (ENST00000409016/ENSG00000040933, exon 12 of 26)	98554425	98556122	1698	+	ENSG00000040933	ENST00000468638	-8064	INPP4A	inositol polyphosphate-4-phosphatase type I A [Source:HGNC Symbol;Acc:HGNC:6074]
18	54828254	54828760	507	WT_un_S5_peak_3783	69	5.29033	6.95301	3.52892	248	Promoter (<=1kb)	54828477	54895516	67040	+	ENSG00000041353	ENST00000262094	0	RAB27B	RAB27B, member RAS oncogene family [Source:HGNC Symbol;Acc:HGNC:9767]
9	115117950	115118302	353	WT_un_S5_peak_8435	75	5.65553	7.50295	4.04628	173	Promoter (<=1kb)	115019575	115118157	98583	-	ENSG00000041982	ENST00000350763	0	TNC	tenascin C [Source:HGNC Symbol;Acc:HGNC:5318]
14	89955803	89956822	1020	WT_un_S5_peak_2713	97	6.75288	9.74924	6.13049	214	Promoter (<=1kb)	89955902	90043341	87440	+	ENSG00000042088	ENST00000393452	0	TDP1	tyrosyl-DNA phosphodiesterase 1 [Source:HGNC Symbol;Acc:HGNC:18884]
10	70126401	70126669	269	WT_un_S5_peak_1060	24	2.553	2.43654	0	244	Promoter (2-3kb)	70098223	70124102	25880	-	ENSG00000042286	ENST00000373248	-2299	AIFM2	apoptosis inducing factor mitochondria associated 2 [Source:HGNC Symbol;Acc:HGNC:21411]
14	88385432	88385700	269	WT_un_S5_peak_2710	32	3.23733	3.22608	0.28631	130	Promoter (<=1kb)	88385638	88416844	31207	+	ENSG00000042317	ENST00000554168	0	SPATA7	spermatogenesis associated 7 [Source:HGNC Symbol;Acc:HGNC:20423]
11	93783934	93785041	1108	WT_un_S5_peak_1722	47	2.904	4.70182	1.51632	371	Promoter (<=1kb)	93784227	93812362	28136	+	ENSG00000042429	ENST00000640804	0	MED17	mediator complex subunit 17 [Source:HGNC Symbol;Acc:HGNC:2375]
2	85354248	85354788	541	WT_un_S5_peak_4428	137	7.8342	13.7571	9.93193	322	Promoter (<=1kb)	85341955	85354528	12574	-	ENSG00000042445	ENST00000295802	0	RETSAT	retinol saturase [Source:HGNC Symbol;Acc:HGNC:25991]
19	46850232	46851006	775	WT_un_S5_peak_4124	84	4.69817	8.44714	4.91684	526	Promoter (<=1kb)	46838136	46850777	12642	-	ENSG00000042753	ENST00000352203	0	AP2S1	adaptor related protein complex 2 subunit sigma 1 [Source:HGNC Symbol;Acc:HGNC:565]
6	43053663	43053967	305	WT_un_S5_peak_7106	53	4.14476	5.32254	2.06685	149	Promoter (<=1kb)	43037617	43053851	16235	-	ENSG00000044090	ENST00000265348	0	CUL7	cullin 7 [Source:HGNC Symbol;Acc:HGNC:21024]
5	138753368	138753702	335	WT_un_S5_peak_6677	35	2.98733	3.53412	0.53357	168	Promoter (<=1kb)	138753418	138783374	29957	+	ENSG00000044115	ENST00000520339	0	CTNNA1	catenin alpha 1 [Source:HGNC Symbol;Acc:HGNC:2509]
9	17135006	17135604	599	WT_un_S5_peak_8237	76	5.4263	7.67804	4.19448	260	Promoter (<=1kb)	17135040	17302051	167012	+	ENSG00000044459	ENST00000380641	0	CNTLN	centlein [Source:HGNC Symbol;Acc:HGNC:23432]
9	125238357	125239149	793	WT_un_S5_peak_8460	36	3.63673	3.6957	0.65998	252	Promoter (2-3kb)	125234860	125241342	6483	-	ENSG00000044574	ENST00000680640	2193	HSPA5	heat shock protein family A (Hsp70) member 5 [Source:HGNC Symbol;Acc:HGNC:5238]
9	125240652	125241974	1323	WT_un_S5_peak_8461	307	13.716	30.7508	26.465	674	Promoter (<=1kb)	125234853	125241343	6491	-	ENSG00000044574	ENST00000324460	0	HSPA5	heat shock protein family A (Hsp70) member 5 [Source:HGNC Symbol;Acc:HGNC:5238]
X	13734296	13735096	801	WT_un_S5_peak_8550	44	3.82659	4.45165	1.28046	276	Promoter (<=1kb)	13734743	13736542	1800	+	ENSG00000046651	ENST00000485052	0	OFD1	OFD1 centriole and centriolar satellite protein [Source:HGNC Symbol;Acc:HGNC:2567]
10	1056388	1056787	400	WT_un_S5_peak_908	23	2.45954	2.30424	0	122	Promoter (<=1kb)	1056404	1096625	40222	+	ENSG00000047056	ENST00000620998	0	WDR37	WD repeat domain 37 [Source:HGNC Symbol;Acc:HGNC:31406]
5	113513421	113514092	672	WT_un_S5_peak_6584	112	7.26272	11.2203	7.52126	300	Promoter (<=1kb)	113513694	113561196	47503	+	ENSG00000047188	ENST00000503857	0	YTHDC2	YTH domain containing 2 [Source:HGNC Symbol;Acc:HGNC:24721]
8	53842594	53843610	1017	WT_un_S5_peak_7904	79	5.6325	7.99793	4.48953	653	Promoter (<=1kb)	53715543	53843245	127703	-	ENSG00000047249	ENST00000359530	0	ATP6V1H	ATPase H+ transporting V1 subunit H [Source:HGNC Symbol;Acc:HGNC:18303]
4	56978695	56979220	526	WT_un_S5_peak_6056	49	3.92836	4.92356	1.71247	133	Promoter (<=1kb)	56978864	57031158	52295	+	ENSG00000047315	ENST00000431623	0	POLR2B	RNA polymerase II subunit B [Source:HGNC Symbol;Acc:HGNC:9188]
1	186375181	186375571	391	WT_un_S5_peak_715	43	4.15497	4.39973	1.26294	208	Promoter (<=1kb)	186311652	186375253	63602	-	ENSG00000047410	ENST00000367478	0	TPR	translocated promoter region, nuclear basket protein [Source:HGNC Symbol;Acc:HGNC:12017]
16	27550092	27550500	409	WT_un_S5_peak_3078	67	4.80384	6.71822	3.31136	147	Promoter (<=1kb)	27550133	27574295	24163	+	ENSG00000047578	ENST00000566023	0	KATNIP	katanin interacting protein [Source:HGNC Symbol;Acc:HGNC:29068]
12	5807391	5808306	916	WT_un_S5_peak_1857a	32	3.23733	3.22608	0.28631	135	Intron (ENST00000546188/ENSG00000047617, intron 7 of 24)	5827805	5870436	42632	-	ENSG00000047617	ENST00000544988	62130	ANO2	anoctamin 2 [Source:HGNC Symbol;Acc:HGNC:1183]
12	5807391	5808306	916	WT_un_S5_peak_1857b	69	5.29033	6.95301	3.52892	531	Intron (ENST00000546188/ENSG00000047617, intron 7 of 24)	5827805	5870436	42632	-	ENSG00000047617	ENST00000544988	62130	ANO2	anoctamin 2 [Source:HGNC Symbol;Acc:HGNC:1183]
12	5808732	5809602	871	WT_un_S5_peak_1858	40	3.5795	4.07966	0.98433	654	Intron (ENST00000546188/ENSG00000047617, intron 7 of 24)	5827805	5870436	42632	-	ENSG00000047617	ENST00000544988	60834	ANO2	anoctamin 2 [Source:HGNC Symbol;Acc:HGNC:1183]
X	17737520	17737865	346	WT_un_S5_peak_8557	64	5.28974	6.43923	3.05901	167	Promoter (<=1kb)	17737551	17749950	12400	+	ENSG00000047634	ENST00000427362	0	SCML1	Scm polycomb group protein like 1 [Source:HGNC Symbol;Acc:HGNC:10580]
3	48088636	48089452	817	WT_un_S5_peak_5494a	61	4.11978	6.15468	2.80986	214	Promoter (<=1kb)	47850696	48088839	238144	-	ENSG00000047849	ENST00000395734	0	MAP4	microtubule associated protein 4 [Source:HGNC Symbol;Acc:HGNC:6862]
3	48088636	48089452	817	WT_un_S5_peak_5494b	43	3.52062	4.37562	1.24128	622	Promoter (<=1kb)	47850696	48088839	238144	-	ENSG00000047849	ENST00000395734	0	MAP4	microtubule associated protein 4 [Source:HGNC Symbol;Acc:HGNC:6862]
6	117613507	117614134	628	WT_un_S5_peak_7282	44	3.82659	4.45165	1.28046	498	Distal Intergenic	117560272	117602542	42271	-	ENSG00000047932	ENST00000535237	-10965	GOPC	golgi associated PDZ and coiled-coil motif containing [Source:HGNC Symbol;Acc:HGNC:17643]
6	117615750	117616459	710	WT_un_S5_peak_7283	26	2.72923	2.69119	0	699	Distal Intergenic	117560272	117602542	42271	-	ENSG00000047932	ENST00000535237	-13208	GOPC	golgi associated PDZ and coiled-coil motif containing [Source:HGNC Symbol;Acc:HGNC:17643]
7	18508758	18509849	1092	WT_un_S5_peak_7446	75	5.65553	7.50295	4.04628	624	Promoter (<=1kb)	18509273	18666900	157628	+	ENSG00000048052	ENST00000456174	0	HDAC9	histone deacetylase 9 [Source:HGNC Symbol;Acc:HGNC:14065]
5	176388236	176389452	1217	WT_un_S5_peak_6812	36	3.07067	3.62443	0.59626	487	Promoter (<=1kb)	176383938	176388762	4825	-	ENSG00000048162	ENST00000619979	0	NOP16	NOP16 nucleolar protein [Source:HGNC Symbol;Acc:HGNC:26934]
8	102238540	102238995	456	WT_un_S5_peak_8074	93	5.57989	9.31879	5.72445	247	Promoter (<=1kb)	102204502	102238961	34460	-	ENSG00000048392	ENST00000251810	0	RRM2B	ribonucleotide reductase regulatory TP53 inducible subunit M2B [Source:HGNC Symbol;Acc:HGNC:17296]
7	127392524	127392946	423	WT_un_S5_peak_7664	47	4.10774	4.76379	1.57115	200	Promoter (<=1kb)	127370043	127392691	22649	-	ENSG00000048405	ENST00000393313	0	ZNF800	zinc finger protein 800 [Source:HGNC Symbol;Acc:HGNC:27267]
6	42217649	42217991	343	WT_un_S5_peak_7098	66	4.43933	6.6833	3.28307	160	Promoter (<=1kb)	42206807	42217861	11055	-	ENSG00000048544	ENST00000053468	0	MRPS10	mitochondrial ribosomal protein S10 [Source:HGNC Symbol;Acc:HGNC:14502]
12	88579843	88580828	986	WT_un_S5_peak_2172	146	8.9476	14.6369	10.775	600	Promoter (<=1kb)	88492793	88580471	87679	-	ENSG00000049130	ENST00000644744	0	KITLG	KIT ligand [Source:HGNC Symbol;Acc:HGNC:6343]
5	60936971	60937239	269	WT_un_S5_peak_6389	30	3.11882	3.06293	0.15335	249	Intron (ENST00000676185/ENSG00000049167, intron 1 of 11)	60903577	60932304	28728	-	ENSG00000049167	ENST00000675920	-4667	ERCC8	ERCC excision repair 8, CSA ubiquitin ligase complex subunit [Source:HGNC Symbol;Acc:HGNC:3439]
5	65190632	65191467	836	WT_un_S5_peak_6403	38	3.44846	3.88541	0.82322	165	Intron (ENST00000381055/ENSG00000049192, intron 21 of 24)	65151528	65198765	47238	-	ENSG00000049192	ENST00000314351	7298	ADAMTS6	ADAM metallopeptidase with thrombospondin type 1 motif 6 [Source:HGNC Symbol;Acc:HGNC:222]
5	65198410	65198749	340	WT_un_S5_peak_6404	44	4.19238	4.45165	1.28046	151	Promoter (<=1kb)	65151528	65198765	47238	-	ENSG00000049192	ENST00000314351	16	ADAMTS6	ADAM metallopeptidase with thrombospondin type 1 motif 6 [Source:HGNC Symbol;Acc:HGNC:222]
5	65199018	65199821	804	WT_un_S5_peak_6405	24	2.89517	2.43654	0	653	Promoter (<=1kb)	65151528	65198765	47238	-	ENSG00000049192	ENST00000314351	-253	ADAMTS6	ADAM metallopeptidase with thrombospondin type 1 motif 6 [Source:HGNC Symbol;Acc:HGNC:222]
5	65475521	65475895	375	WT_un_S5_peak_6406	23	2.86338	2.39668	0	110	Promoter (1-2kb)	65214398	65473694	259297	-	ENSG00000049192	ENST00000470597	-1827	ADAMTS6	ADAM metallopeptidase with thrombospondin type 1 motif 6 [Source:HGNC Symbol;Acc:HGNC:222]
5	65479662	65480657	996	WT_un_S5_peak_6407a	40	3.5402	4.02122	0.94915	609	Promoter (<=1kb)	65148739	65481417	332679	-	ENSG00000049192	ENST00000381052	760	ADAMTS6	ADAM metallopeptidase with thrombospondin type 1 motif 6 [Source:HGNC Symbol;Acc:HGNC:222]
5	65479662	65480657	996	WT_un_S5_peak_6407b	46	4.00398	4.61477	1.43357	825	Promoter (<=1kb)	65148739	65481417	332679	-	ENSG00000049192	ENST00000381052	760	ADAMTS6	ADAM metallopeptidase with thrombospondin type 1 motif 6 [Source:HGNC Symbol;Acc:HGNC:222]
1	9234809	9235379	571	WT_un_S5_peak_47	43	3.49294	4.33276	1.20064	177	Promoter (<=1kb)	9234774	9271337	36564	+	ENSG00000049239	ENST00000377403	35	H6PD	hexose-6-phosphate dehydrogenase/glucose 1-dehydrogenase [Source:HGNC Symbol;Acc:HGNC:4795]
1	7792360	7792628	269	WT_un_S5_peak_26	24	2.89517	2.43654	0	77	Intron (ENST00000377532/ENSG00000049246, intron 5 of 21)	7787322	7788570	1249	+	ENSG00000049246	ENST00000602883	5038	PER3	period circadian regulator 3 [Source:HGNC Symbol;Acc:HGNC:8847]
11	32090737	32092178	1442	WT_un_S5_peak_1392a	126	5.89575	12.6839	8.91117	504	Promoter (<=1kb)	32091074	32105722	14649	+	ENSG00000049449	ENST00000054950	0	RCN1	reticulocalbin 1 [Source:HGNC Symbol;Acc:HGNC:9934]
11	32090737	32092178	1442	WT_un_S5_peak_1392b	163	8.88941	16.3671	12.4422	1016	Promoter (<=1kb)	32091074	32105722	14649	+	ENSG00000049449	ENST00000054950	0	RCN1	reticulocalbin 1 [Source:HGNC Symbol;Acc:HGNC:9934]
11	32093781	32094193	413	WT_un_S5_peak_1393	24	2.63992	2.41761	0	171	Promoter (2-3kb)	32091610	32098458	6849	+	ENSG00000049449	ENST00000532721	2171	RCN1	reticulocalbin 1 [Source:HGNC Symbol;Acc:HGNC:9934]
11	32101735	32102615	881	WT_un_S5_peak_1394	43	3.79245	4.39973	1.26294	629	Promoter (<=1kb)	32101995	32105531	3537	+	ENSG00000049449	ENST00000531345	0	RCN1	reticulocalbin 1 [Source:HGNC Symbol;Acc:HGNC:9934]
6	157021050	157022338	1289	WT_un_S5_peak_7382a	86	6.3871	8.60744	5.05654	436	Promoter (<=1kb)	157022286	157208694	186409	+	ENSG00000049618	ENST00000635849	0	ARID1B	AT-rich interaction domain 1B [Source:HGNC Symbol;Acc:HGNC:18040]
6	157021050	157022338	1289	WT_un_S5_peak_7382b	40	3.92167	4.07966	0.98433	831	Promoter (<=1kb)	157022286	157208694	186409	+	ENSG00000049618	ENST00000635849	0	ARID1B	AT-rich interaction domain 1B [Source:HGNC Symbol;Acc:HGNC:18040]
5	1326533	1326893	361	WT_un_S5_peak_6205	45	3.67539	4.54278	1.36717	152	Promoter (<=1kb)	1320616	1326436	5821	-	ENSG00000049656	ENST00000507195	-97	CLPTM1L	CLPTM1 like [Source:HGNC Symbol;Acc:HGNC:24308]
5	1344911	1345408	498	WT_un_S5_peak_6206	42	3.70955	4.20702	1.09574	304	Promoter (<=1kb)	1317752	1345099	27348	-	ENSG00000049656	ENST00000320895	0	CLPTM1L	CLPTM1 like [Source:HGNC Symbol;Acc:HGNC:24308]
18	58221265	58221968	704	WT_un_S5_peak_3787	137	8.02767	13.7287	9.90399	393	Promoter (<=1kb)	58221535	58396578	175044	+	ENSG00000049759	ENST00000431212	0	NEDD4L	NEDD4 like E3 ubiquitin protein ligase [Source:HGNC Symbol;Acc:HGNC:7728]
18	58222868	58223258	391	WT_un_S5_peak_3788	44	4.19238	4.45165	1.28046	214	Promoter (1-2kb)	58221631	58316001	94371	+	ENSG00000049759	ENST00000585323	1237	NEDD4L	NEDD4 like E3 ubiquitin protein ligase [Source:HGNC Symbol;Acc:HGNC:7728]
18	58223464	58224439	976	WT_un_S5_peak_3789	44	3.82659	4.45165	1.28046	748	Promoter (1-2kb)	58221631	58316001	94371	+	ENSG00000049759	ENST00000585323	1833	NEDD4L	NEDD4 like E3 ubiquitin protein ligase [Source:HGNC Symbol;Acc:HGNC:7728]
X	49269584	49270052	469	WT_un_S5_peak_8623	30	3.11882	3.06293	0.15335	126	Promoter (<=1kb)	49269793	49288090	18298	+	ENSG00000049769	ENST00000055335	0	PPP1R3F	protein phosphatase 1 regulatory subunit 3F [Source:HGNC Symbol;Acc:HGNC:14944]
5	74638427	74639538	1112	WT_un_S5_peak_6443a	51	4.06837	5.13427	1.89147	163	Promoter (<=1kb)	74640023	74721288	81266	+	ENSG00000049860	ENST00000511181	-485	HEXB	hexosaminidase subunit beta [Source:HGNC Symbol;Acc:HGNC:4879]
5	74638427	74639538	1112	WT_un_S5_peak_6443b	45	3.95404	4.54325	1.36717	966	Promoter (<=1kb)	74640023	74721288	81266	+	ENSG00000049860	ENST00000511181	-485	HEXB	hexosaminidase subunit beta [Source:HGNC Symbol;Acc:HGNC:4879]
5	74639727	74641631	1905	WT_un_S5_peak_6444a	117	5.55358	11.7967	8.07046	429	Promoter (<=1kb)	74640023	74721288	81266	+	ENSG00000049860	ENST00000511181	0	HEXB	hexosaminidase subunit beta [Source:HGNC Symbol;Acc:HGNC:4879]
5	74639727	74641631	1905	WT_un_S5_peak_6444b	361	14.5195	36.1284	31.744	916	Promoter (<=1kb)	74640023	74721288	81266	+	ENSG00000049860	ENST00000511181	0	HEXB	hexosaminidase subunit beta [Source:HGNC Symbol;Acc:HGNC:4879]
5	74685072	74685460	389	WT_un_S5_peak_6445	67	4.80384	6.71822	3.31136	190	Promoter (<=1kb)	74685196	74706168	20973	+	ENSG00000049860	ENST00000513079	0	HEXB	hexosaminidase subunit beta [Source:HGNC Symbol;Acc:HGNC:4879]
5	72320027	72320755	729	WT_un_S5_peak_6427	33	3.08831	3.35878	0.39839	259	Promoter (<=1kb)	72320367	72359352	38986	+	ENSG00000049883	ENST00000536805	0	PTCD2	pentatricopeptide repeat domain 2 [Source:HGNC Symbol;Acc:HGNC:25734]
14	59483711	59484531	821	WT_un_S5_peak_2625	50	3.98311	5.08049	1.8432	453	Promoter (<=1kb)	59484443	59505404	20962	+	ENSG00000050130	ENST00000356057	0	JKAMP	JNK1/MAPK8 associated membrane protein [Source:HGNC Symbol;Acc:HGNC:20184]
7	26184202	26186652	2451	WT_un_S5_peak_7481a	40	3.5795	4.07966	0.98433	266	Promoter (<=1kb)	26184060	26186317	2258	+	ENSG00000050344	ENST00000606261	142	NFE2L3	nuclear factor, erythroid 2 like 3 [Source:HGNC Symbol;Acc:HGNC:7783]
7	26184202	26186652	2451	WT_un_S5_peak_7481b	64	4.92395	6.43923	3.05901	1359	Promoter (<=1kb)	26184060	26186317	2258	+	ENSG00000050344	ENST00000606261	142	NFE2L3	nuclear factor, erythroid 2 like 3 [Source:HGNC Symbol;Acc:HGNC:7783]
7	26186964	26189130	2167	WT_un_S5_peak_7482a	121	7.48446	12.1335	8.38243	741	Promoter (2-3kb)	26184060	26186317	2258	+	ENSG00000050344	ENST00000606261	2904	NFE2L3	nuclear factor, erythroid 2 like 3 [Source:HGNC Symbol;Acc:HGNC:7783]
7	26186964	26189130	2167	WT_un_S5_peak_7482b	79	5.6325	7.99793	4.48953	1528	Promoter (2-3kb)	26184060	26186317	2258	+	ENSG00000050344	ENST00000606261	2904	NFE2L3	nuclear factor, erythroid 2 like 3 [Source:HGNC Symbol;Acc:HGNC:7783]
7	26189296	26189601	306	WT_un_S5_peak_7483	44	4.19238	4.45165	1.28046	146	Intron (ENST00000679318/ENSG00000122566, intron 10 of 11)	26184060	26186317	2258	+	ENSG00000050344	ENST00000606261	5236	NFE2L3	nuclear factor, erythroid 2 like 3 [Source:HGNC Symbol;Acc:HGNC:7783]
7	26189817	26190244	428	WT_un_S5_peak_7484	54	4.55817	5.42044	2.14934	205	3' UTR	26184060	26186317	2258	+	ENSG00000050344	ENST00000606261	5757	NFE2L3	nuclear factor, erythroid 2 like 3 [Source:HGNC Symbol;Acc:HGNC:7783]
7	26190488	26190769	282	WT_un_S5_peak_7485	44	3.82659	4.45165	1.28046	143	3' UTR	26184060	26186317	2258	+	ENSG00000050344	ENST00000606261	6428	NFE2L3	nuclear factor, erythroid 2 like 3 [Source:HGNC Symbol;Acc:HGNC:7783]
7	26190943	26191769	827	WT_un_S5_peak_7486	44	3.82659	4.45165	1.28046	615	3' UTR	26184060	26186317	2258	+	ENSG00000050344	ENST00000606261	6883	NFE2L3	nuclear factor, erythroid 2 like 3 [Source:HGNC Symbol;Acc:HGNC:7783]
6	13813843	13814262	420	WT_un_S5_peak_6908	27	2.68193	2.72885	0	167	Promoter (<=1kb)	13786557	13814568	28012	-	ENSG00000050393	ENST00000379170	306	MCUR1	mitochondrial calcium uniporter regulator 1 [Source:HGNC Symbol;Acc:HGNC:21097]
12	50201958	50202226	269	WT_un_S5_peak_2013	28	2.71082	2.81268	0	128	Promoter (<=1kb)	50175788	50202112	26325	-	ENSG00000050405	ENST00000547825	0	LIMA1	LIM domain and actin binding 1 [Source:HGNC Symbol;Acc:HGNC:24636]
12	50220948	50222795	1848	WT_un_S5_peak_2014a	58	4.22258	5.81773	2.5111	256	Promoter (<=1kb)	50175788	50222348	46561	-	ENSG00000050405	ENST00000552823	0	LIMA1	LIM domain and actin binding 1 [Source:HGNC Symbol;Acc:HGNC:24636]
12	50220948	50222795	1848	WT_un_S5_peak_2014b	50	3.98311	5.08049	1.8432	749	Promoter (<=1kb)	50175788	50222348	46561	-	ENSG00000050405	ENST00000552823	0	LIMA1	LIM domain and actin binding 1 [Source:HGNC Symbol;Acc:HGNC:24636]
12	50220948	50222795	1848	WT_un_S5_peak_2014c	95	5.82036	9.55623	5.95591	1596	Promoter (<=1kb)	50175788	50222348	46561	-	ENSG00000050405	ENST00000552823	0	LIMA1	LIM domain and actin binding 1 [Source:HGNC Symbol;Acc:HGNC:24636]
16	75244955	75245885	931	WT_un_S5_peak_3192	106	5.74503	10.6979	7.03549	670	Promoter (2-3kb)	75235668	75242702	7035	-	ENSG00000050820	ENST00000569340	-2253	BCAR1	BCAR1 scaffold protein, Cas family member [Source:HGNC Symbol;Acc:HGNC:971]
16	75246715	75247083	369	WT_un_S5_peak_3193	31	2.95791	3.1253	0.20805	164	Promoter (1-2kb)	75229453	75248240	18788	-	ENSG00000050820	ENST00000542031	1157	BCAR1	BCAR1 scaffold protein, Cas family member [Source:HGNC Symbol;Acc:HGNC:971]
16	75250111	75251828	1718	WT_un_S5_peak_3194a	53	3.94419	5.38072	2.12166	216	Promoter (<=1kb)	75228181	75251624	23444	-	ENSG00000050820	ENST00000162330	0	BCAR1	BCAR1 scaffold protein, Cas family member [Source:HGNC Symbol;Acc:HGNC:971]
16	75250111	75251828	1718	WT_un_S5_peak_3194b	112	4.61483	11.2515	7.55144	1460	Promoter (<=1kb)	75228181	75251624	23444	-	ENSG00000050820	ENST00000162330	0	BCAR1	BCAR1 scaffold protein, Cas family member [Source:HGNC Symbol;Acc:HGNC:971]
11	6234517	6234839	323	WT_un_S5_peak_1268	59	4.606	5.94877	2.6174	160	Promoter (<=1kb)	6211345	6234636	23292	-	ENSG00000051009	ENST00000449352	0	FAM160A2	family with sequence similarity 160 member A2 [Source:HGNC Symbol;Acc:HGNC:25378]
16	56931746	56933009	1264	WT_un_S5_peak_3135a	513	18.7639	51.34	46.6938	378	Promoter (<=1kb)	56932142	56935554	3413	+	ENSG00000051108	ENST00000562914	0	HERPUD1	homocysteine inducible ER protein with ubiquitin like domain 1 [Source:HGNC Symbol;Acc:HGNC:13744]
16	56931746	56933009	1264	WT_un_S5_peak_3135b	38	3.43927	3.8107	0.76885	1037	Promoter (<=1kb)	56932142	56935554	3413	+	ENSG00000051108	ENST00000562914	0	HERPUD1	homocysteine inducible ER protein with ubiquitin like domain 1 [Source:HGNC Symbol;Acc:HGNC:13744]
16	56945348	56945638	291	WT_un_S5_peak_3136	42	3.45303	4.20702	1.09574	209	Distal Intergenic	56942011	56943407	1397	+	ENSG00000051108	ENST00000568814	3337	HERPUD1	homocysteine inducible ER protein with ubiquitin like domain 1 [Source:HGNC Symbol;Acc:HGNC:13744]
15	40694758	40695324	567	WT_un_S5_peak_2810	29	2.84256	2.9599	0.06978	431	Promoter (<=1kb)	40694774	40718886	24113	+	ENSG00000051180	ENST00000527860	0	RAD51	RAD51 recombinase [Source:HGNC Symbol;Acc:HGNC:9817]
12	123232759	123233193	435	WT_un_S5_peak_2292	93	5.57989	9.31879	5.72445	203	Promoter (<=1kb)	123154215	123233141	78927	-	ENSG00000051825	ENST00000606320	0	MPHOSPH9	M-phase phosphoprotein 9 [Source:HGNC Symbol;Acc:HGNC:7215]
1	114780438	114780713	276	WT_un_S5_peak_469	75	4.66745	7.53305	4.06575	131	Promoter (<=1kb)	114769479	114780685	11207	-	ENSG00000052723	ENST00000060969	0	SIKE1	suppressor of IKBKE 1 [Source:HGNC Symbol;Acc:HGNC:26119]
10	97400292	97401643	1352	WT_un_S5_peak_1139a	27	2.70548	2.76251	0	404	Promoter (<=1kb)	97356701	97401340	44640	-	ENSG00000052749	ENST00000370992	0	RRP12	ribosomal RNA processing 12 homolog [Source:HGNC Symbol;Acc:HGNC:29100]
10	97400292	97401643	1352	WT_un_S5_peak_1139b	93	5.57989	9.31879	5.72445	969	Promoter (<=1kb)	97356701	97401340	44640	-	ENSG00000052749	ENST00000370992	0	RRP12	ribosomal RNA processing 12 homolog [Source:HGNC Symbol;Acc:HGNC:29100]
4	165327064	165327564	501	WT_un_S5_peak_6175	26	3.09502	2.69119	0	289	Promoter (<=1kb)	165327667	165340351	12685	+	ENSG00000052802	ENST00000507013	-103	MSMO1	methylsterol monooxygenase 1 [Source:HGNC Symbol;Acc:HGNC:10545]
11	43358697	43359127	431	WT_un_S5_peak_1422	90	6.31683	9.08008	5.50262	186	Promoter (<=1kb)	43358920	43494931	136012	+	ENSG00000052841	ENST00000039989	0	TTC17	tetratricopeptide repeat domain 17 [Source:HGNC Symbol;Acc:HGNC:25596]
11	44301084	44301883	800	WT_un_S5_peak_1426	82	5.80222	8.26277	4.74547	272	Intron (ENST00000652299/ENSG00000052850, intron 1 of 3)	44260440	44310139	49700	-	ENSG00000052850	ENST00000652299	8256	ALX4	ALX homeobox 4 [Source:HGNC Symbol;Acc:HGNC:450]
1	19251535	19251937	403	WT_un_S5_peak_78	47	3.79103	4.79015	1.59279	152	Promoter (<=1kb)	19251805	19260128	8324	+	ENSG00000053372	ENST00000330263	0	MRTO4	MRT4 homolog, ribosome maturation factor [Source:HGNC Symbol;Acc:HGNC:18477]
19	17215300	17215598	299	WT_un_S5_peak_3942	40	3.09801	4.00998	0.94075	250	Promoter (<=1kb)	17215346	17217617	2272	+	ENSG00000053501	ENST00000601662	0	USE1	unconventional SNARE in the ER 1 [Source:HGNC Symbol;Acc:HGNC:30882]
18	23838511	23838856	346	WT_un_S5_peak_3729	35	3.46081	3.53919	0.53357	192	Promoter (<=1kb)	23838796	23956222	117427	+	ENSG00000053747	ENST00000649721	0	LAMA3	laminin subunit alpha 3 [Source:HGNC Symbol;Acc:HGNC:6483]
14	57268681	57268957	277	WT_un_S5_peak_2617	38	3.7781	3.88541	0.82322	219	Promoter (<=1kb)	57268924	57275469	6546	+	ENSG00000053770	ENST00000554931	0	AP5M1	adaptor related protein complex 5 subunit mu 1 [Source:HGNC Symbol;Acc:HGNC:20192]
4	25377343	25377611	269	WT_un_S5_peak_6006	31	3.20179	3.17697	0.25446	132	Promoter (<=1kb)	25377357	25380608	3252	+	ENSG00000053900	ENST00000507809	0	ANAPC4	anaphase promoting complex subunit 4 [Source:HGNC Symbol;Acc:HGNC:19990]
1	36150706	36151053	348	WT_un_S5_peak_178	28	2.73872	2.85297	0	254	Promoter (1-2kb)	36136570	36149514	12945	-	ENSG00000054116	ENST00000616395	-1192	TRAPPC3	trafficking protein particle complex 3 [Source:HGNC Symbol;Acc:HGNC:19942]
1	36224247	36224567	321	WT_un_S5_peak_179	76	5.04298	7.6572	4.18604	219	Promoter (<=1kb)	36224432	36304148	79717	+	ENSG00000054118	ENST00000469141	0	THRAP3	thyroid hormone receptor associated protein 3 [Source:HGNC Symbol;Acc:HGNC:22964]
1	210438577	210439053	477	WT_un_S5_peak_778	35	3.46081	3.53919	0.53357	303	Promoter (<=1kb)	210439583	210676296	236714	+	ENSG00000054392	ENST00000367009	-530	HHAT	hedgehog acyltransferase [Source:HGNC Symbol;Acc:HGNC:18270]
1	210439207	210440820	1614	WT_un_S5_peak_779a	109	7.11867	10.9254	7.24635	312	Promoter (<=1kb)	210439583	210676296	236714	+	ENSG00000054392	ENST00000367009	0	HHAT	hedgehog acyltransferase [Source:HGNC Symbol;Acc:HGNC:18270]
1	210439207	210440820	1614	WT_un_S5_peak_779b	64	5.28974	6.43923	3.05901	740	Promoter (<=1kb)	210439583	210676296	236714	+	ENSG00000054392	ENST00000367009	0	HHAT	hedgehog acyltransferase [Source:HGNC Symbol;Acc:HGNC:18270]
1	210439207	210440820	1614	WT_un_S5_peak_779c	44	4.19238	4.45165	1.28046	1388	Promoter (<=1kb)	210439583	210676296	236714	+	ENSG00000054392	ENST00000367009	0	HHAT	hedgehog acyltransferase [Source:HGNC Symbol;Acc:HGNC:18270]
1	10210494	10210764	271	WT_un_S5_peak_50	47	3.26588	4.73444	1.54742	170	Promoter (<=1kb)	10210570	10308597	98028	+	ENSG00000054523	ENST00000377093	0	KIF1B	kinesin family member 1B [Source:HGNC Symbol;Acc:HGNC:16636]
22	46762015	46762725	711	WT_un_S5_peak_5292	123	7.60113	12.3888	8.62888	483	Promoter (<=1kb)	46762617	47175699	413083	+	ENSG00000054611	ENST00000380995	0	TBC1D22A	TBC1 domain family member 22A [Source:HGNC Symbol;Acc:HGNC:1309]
11	73376247	73376664	418	WT_un_S5_peak_1605	139	4.89275	13.9445	10.1147	213	Promoter (<=1kb)	73376399	73397474	21076	+	ENSG00000054967	ENST00000064780	0	RELT	RELT TNF receptor [Source:HGNC Symbol;Acc:HGNC:13764]
2	202265434	202266435	1002	WT_un_S5_peak_4688	240	11.1672	24.0629	19.9218	343	Promoter (<=1kb)	202265736	202284378	18643	+	ENSG00000055044	ENST00000426814	0	NOP58	NOP58 ribonucleoprotein [Source:HGNC Symbol;Acc:HGNC:29926]
1	16367175	16368042	868	WT_un_S5_peak_68a	57	3.89301	5.77252	2.47176	143	Promoter (<=1kb)	16367225	16398145	30921	+	ENSG00000055070	ENST00000401089	0	SZRD1	SUZ RNA binding domain containing 1 [Source:HGNC Symbol;Acc:HGNC:30232]
1	16367175	16368042	868	WT_un_S5_peak_68b	24	2.303	2.41987	0	448	Promoter (<=1kb)	16367225	16398145	30921	+	ENSG00000055070	ENST00000401089	0	SZRD1	SUZ RNA binding domain containing 1 [Source:HGNC Symbol;Acc:HGNC:30232]
1	16367175	16368042	868	WT_un_S5_peak_68c	24	2.67071	2.4179	0	734	Promoter (<=1kb)	16367225	16398145	30921	+	ENSG00000055070	ENST00000401089	0	SZRD1	SUZ RNA binding domain containing 1 [Source:HGNC Symbol;Acc:HGNC:30232]
5	157309496	157309764	269	WT_un_S5_peak_6757	32	3.24496	3.23664	0.29553	195	Promoter (1-2kb)	157311038	157314370	3333	+	ENSG00000055163	ENST00000520942	-1274	CYFIP2	cytoplasmic FMR1 interacting protein 2 [Source:HGNC Symbol;Acc:HGNC:13760]
17	78839900	78841175	1276	WT_un_S5_peak_3625a	36	3.29878	3.62443	0.59626	198	Promoter (<=1kb)	78787467	78840780	53314	-	ENSG00000055483	ENST00000589225	0	USP36	ubiquitin specific peptidase 36 [Source:HGNC Symbol;Acc:HGNC:20062]
17	78839900	78841175	1276	WT_un_S5_peak_3625b	98	5.29329	9.88712	6.26064	781	Promoter (<=1kb)	78787467	78840780	53314	-	ENSG00000055483	ENST00000589225	0	USP36	ubiquitin specific peptidase 36 [Source:HGNC Symbol;Acc:HGNC:20062]
17	78839900	78841175	1276	WT_un_S5_peak_3625c	66	4.43933	6.6833	3.28307	1098	Promoter (<=1kb)	78787467	78840780	53314	-	ENSG00000055483	ENST00000589225	0	USP36	ubiquitin specific peptidase 36 [Source:HGNC Symbol;Acc:HGNC:20062]
X	130268623	130268901	279	WT_un_S5_peak_8689	35	3.46081	3.53919	0.53357	126	Promoter (<=1kb)	130202707	130268899	66193	-	ENSG00000056277	ENST00000370978	0	ZNF280C	zinc finger protein 280C [Source:HGNC Symbol;Acc:HGNC:25955]
9	122904637	122905755	1119	WT_un_S5_peak_8448	53	4.51749	5.36032	2.10295	886	Promoter (<=1kb)	122844556	122905359	60804	-	ENSG00000056586	ENST00000357244	0	RC3H2	ring finger and CCCH-type domains 2 [Source:HGNC Symbol;Acc:HGNC:21461]
3	98901582	98901853	272	WT_un_S5_peak_5627	35	2.81625	3.53412	0.53357	234	Promoter (<=1kb)	98795941	98901695	105755	-	ENSG00000057019	ENST00000326840	0	DCBLD2	discoidin, CUB and LCCL domain containing 2 [Source:HGNC Symbol;Acc:HGNC:24627]
1	75796526	75797335	810	WT_un_S5_peak_333	74	5.28923	7.46621	4.01975	334	Promoter (<=1kb)	75796882	75913242	116361	+	ENSG00000057468	ENST00000263187	0	MSH4	mutS homolog 4 [Source:HGNC Symbol;Acc:HGNC:7327]
1	75797628	75798000	373	WT_un_S5_peak_334	25	2.72974	2.53736	0	111	Promoter (<=1kb)	75796882	75913242	116361	+	ENSG00000057468	ENST00000263187	746	MSH4	mutS homolog 4 [Source:HGNC Symbol;Acc:HGNC:7327]
10	5813132	5814236	1105	WT_un_S5_peak_925	86	6.02131	8.60744	5.05654	241	Promoter (<=1kb)	5765223	5813434	48212	-	ENSG00000057608	ENST00000380191	0	GDI2	GDP dissociation inhibitor 2 [Source:HGNC Symbol;Acc:HGNC:4227]
6	106086203	106086566	364	WT_un_S5_peak_7251	64	4.92395	6.43923	3.05901	189	Promoter (<=1kb)	106086320	106107508	21189	+	ENSG00000057657	ENST00000369091	0	PRDM1	PR/SET domain 1 [Source:HGNC Symbol;Acc:HGNC:9346]
1	23778152	23778693	542	WT_un_S5_peak_94	35	2.98733	3.53412	0.53357	390	Promoter (<=1kb)	23778418	23788232	9815	+	ENSG00000057757	ENST00000246151	0	PITHD1	PITH domain containing 1 [Source:HGNC Symbol;Acc:HGNC:25022]
3	128052266	128052664	399	WT_un_S5_peak_5698	26	2.72923	2.69119	0	177	Promoter (<=1kb)	128052426	128060211	7786	+	ENSG00000058262	ENST00000481210	0	SEC61A1	SEC61 translocon subunit alpha 1 [Source:HGNC Symbol;Acc:HGNC:18276]
12	79934321	79935590	1270	WT_un_S5_peak_2167	121	7.48446	12.1335	8.38243	828	Promoter (<=1kb)	79773563	79935455	161893	-	ENSG00000058272	ENST00000261207	0	PPP1R12A	protein phosphatase 1 regulatory subunit 12A [Source:HGNC Symbol;Acc:HGNC:7618]
16	22298121	22298827	707	WT_un_S5_peak_3071	34	3.38173	3.42749	0.45811	404	Promoter (<=1kb)	22297455	22329091	31637	+	ENSG00000058600	ENST00000564061	666	POLR3E	RNA polymerase III subunit E [Source:HGNC Symbol;Acc:HGNC:30347]
1	203626672	203627012	341	WT_un_S5_peak_750	23	2.82579	2.34975	0	227	Promoter (<=1kb)	203626787	203744079	117293	+	ENSG00000058668	ENST00000367218	0	ATP2B4	ATPase plasma membrane Ca2+ transporting 4 [Source:HGNC Symbol;Acc:HGNC:817]
1	203795506	203795774	269	WT_un_S5_peak_751	24	2.89517	2.43654	0	92	Promoter (<=1kb)	203795623	203854124	58502	+	ENSG00000058673	ENST00000367210	0	ZC3H11A	zinc finger CCCH-type containing 11A [Source:HGNC Symbol;Acc:HGNC:29093]
2	69914324	69915251	928	WT_un_S5_peak_4400	44	4.19238	4.45165	1.28046	437	Promoter (<=1kb)	69915041	69942938	27898	+	ENSG00000059728	ENST00000540449	0	MXD1	MAX dimerization protein 1 [Source:HGNC Symbol;Acc:HGNC:6761]
9	111631153	111631672	520	WT_un_S5_peak_8424	249	9.35836	24.9922	20.828	223	Promoter (<=1kb)	111631334	111654345	23012	+	ENSG00000059769	ENST00000313525	0	DNAJC25	DnaJ heat shock protein family (Hsp40) member C25 [Source:HGNC Symbol;Acc:HGNC:34187]
12	7935883	7936361	479	WT_un_S5_peak_1881	93	5.57989	9.31879	5.72445	269	Promoter (<=1kb)	7919230	7936187	16958	-	ENSG00000059804	ENST00000075120	0	SLC2A3	solute carrier family 2 member 3 [Source:HGNC Symbol;Acc:HGNC:11007]
12	10718205	10718473	269	WT_un_S5_peak_1891	23	2.45954	2.30424	0	74	Promoter (<=1kb)	10704023	10718430	14408	-	ENSG00000060138	ENST00000539204	0	YBX3	Y-box binding protein 3 [Source:HGNC Symbol;Acc:HGNC:2428]
12	10721552	10723523	1972	WT_un_S5_peak_1892a	54	4.55817	5.42044	2.14934	396	Promoter (<=1kb)	10699089	10723307	24219	-	ENSG00000060138	ENST00000279550	0	YBX3	Y-box binding protein 3 [Source:HGNC Symbol;Acc:HGNC:2428]
12	10721552	10723523	1972	WT_un_S5_peak_1892b	64	5.28974	6.43923	3.05901	786	Promoter (<=1kb)	10699089	10723307	24219	-	ENSG00000060138	ENST00000279550	0	YBX3	Y-box binding protein 3 [Source:HGNC Symbol;Acc:HGNC:2428]
12	10721552	10723523	1972	WT_un_S5_peak_1892c	29	2.64517	2.95763	0.06978	1298	Promoter (<=1kb)	10699089	10723307	24219	-	ENSG00000060138	ENST00000279550	0	YBX3	Y-box binding protein 3 [Source:HGNC Symbol;Acc:HGNC:2428]
12	10721552	10723523	1972	WT_un_S5_peak_1892d	121	6.49233	12.1886	8.43326	1676	Promoter (<=1kb)	10699089	10723307	24219	-	ENSG00000060138	ENST00000279550	0	YBX3	Y-box binding protein 3 [Source:HGNC Symbol;Acc:HGNC:2428]
1	26787809	26788344	536	WT_un_S5_peak_127	36	3.07067	3.62443	0.59626	351	Promoter (<=1kb)	26787950	26800659	12710	+	ENSG00000060642	ENST00000674202	0	PIGV	phosphatidylinositol glycan anchor biosynthesis class V [Source:HGNC Symbol;Acc:HGNC:26031]
1	31296442	31297115	674	WT_un_S5_peak_147	96	5.88026	9.65303	6.04971	517	Promoter (<=1kb)	31259568	31296788	37221	-	ENSG00000060688	ENST00000263694	0	SNRNP40	small nuclear ribonucleoprotein U5 subunit 40 [Source:HGNC Symbol;Acc:HGNC:30857]
1	103106919	103107189	271	WT_un_S5_peak_435	44	4.19238	4.45165	1.28046	133	Promoter (<=1kb)	103008473	103108178	99706	-	ENSG00000060718	ENST00000427239	989	COL11A1	collagen type XI alpha 1 chain [Source:HGNC Symbol;Acc:HGNC:2186]
12	24947188	24947493	306	WT_un_S5_peak_1925	25	2.76105	2.57922	0	139	Promoter (1-2kb)	24817809	24949043	131235	-	ENSG00000060982	ENST00000539780	1550	BCAT1	branched chain amino acid transaminase 1 [Source:HGNC Symbol;Acc:HGNC:976]
12	24948732	24949429	698	WT_un_S5_peak_1926	125	7.6855	12.5229	8.75637	242	Promoter (<=1kb)	24810024	24949101	139078	-	ENSG00000060982	ENST00000261192	0	BCAT1	branched chain amino acid transaminase 1 [Source:HGNC Symbol;Acc:HGNC:976]
12	47820035	47820303	269	WT_un_S5_peak_1987	48	3.36398	4.85329	1.65239	117	Promoter (<=1kb)	47798560	47819980	21421	-	ENSG00000061273	ENST00000417107	-55	HDAC7	histone deacetylase 7 [Source:HGNC Symbol;Acc:HGNC:14067]
20	35616069	35616390	322	WT_un_S5_peak_4911	53	3.90809	5.38344	2.12431	167	Promoter (<=1kb)	35615829	35621094	5266	+	ENSG00000061656	ENST00000679710	240	SPAG4	sperm associated antigen 4 [Source:HGNC Symbol;Acc:HGNC:11214]
12	131710610	131711178	569	WT_un_S5_peak_2303	38	3.44846	3.88541	0.82322	126	Promoter (<=1kb)	131711081	131725609	14529	+	ENSG00000061936	ENST00000540469	0	SFSWAP	splicing factor SWAP [Source:HGNC Symbol;Acc:HGNC:10790]
12	62466686	62467116	431	WT_un_S5_peak_2096	36	3.07067	3.62443	0.59626	242	Promoter (<=1kb)	62466817	62597583	130767	+	ENSG00000061987	ENST00000641654	0	MON2	MON2 homolog, regulator of endosome-to-Golgi trafficking [Source:HGNC Symbol;Acc:HGNC:29177]
5	57174179	57174560	382	WT_un_S5_peak_6374	43	3.52689	4.33257	1.20064	185	Promoter (<=1kb)	57174059	57264673	90615	+	ENSG00000062194	ENST00000506184	120	GPBP1	GC-rich promoter binding protein 1 [Source:HGNC Symbol;Acc:HGNC:29520]
12	56300040	56300536	497	WT_un_S5_peak_2072	29	2.84256	2.9599	0.06978	124	Promoter (<=1kb)	56271699	56300318	28620	-	ENSG00000062485	ENST00000549143	0	CS	citrate synthase [Source:HGNC Symbol;Acc:HGNC:2422]
7	43869412	43870036	625	WT_un_S5_peak_7528	67	4.80384	6.71822	3.31136	195	Promoter (<=1kb)	43866558	43869517	2960	-	ENSG00000062582	ENST00000317534	0	MRPS24	mitochondrial ribosomal protein S24 [Source:HGNC Symbol;Acc:HGNC:14510]
17	59707316	59707930	615	WT_un_S5_peak_3533	78	4.85686	7.85256	4.36153	267	Promoter (<=1kb)	59707648	59773804	66157	+	ENSG00000062716	ENST00000593168	0	VMP1	vacuole membrane protein 1 [Source:HGNC Symbol;Acc:HGNC:29559]
17	59837345	59846502	9158	WT_un_S5_peak_3535m	61	4.71691	6.16648	2.81951	8693	Promoter (<=1kb)	59837628	59840223	2596	+	ENSG00000062716	ENST00000591782	0	VMP1	vacuole membrane protein 1 [Source:HGNC Symbol;Acc:HGNC:29559]
17	59837345	59846502	9158	WT_un_S5_peak_3535a	694	20.8647	69.4022	64.4848	706	Promoter (<=1kb)	59837628	59840223	2596	+	ENSG00000062716	ENST00000591782	0	VMP1	vacuole membrane protein 1 [Source:HGNC Symbol;Acc:HGNC:29559]
17	59837345	59846502	9158	WT_un_S5_peak_3535b	431	12.9102	43.1346	38.6213	1819	Promoter (<=1kb)	59837628	59840223	2596	+	ENSG00000062716	ENST00000591782	0	VMP1	vacuole membrane protein 1 [Source:HGNC Symbol;Acc:HGNC:29559]
17	59837345	59846502	9158	WT_un_S5_peak_3535c	355	13.657	35.5262	31.1518	2278	Promoter (<=1kb)	59837628	59840223	2596	+	ENSG00000062716	ENST00000591782	0	VMP1	vacuole membrane protein 1 [Source:HGNC Symbol;Acc:HGNC:29559]
17	59837345	59846502	9158	WT_un_S5_peak_3535d	393	14.02	39.3523	34.9065	3068	Promoter (<=1kb)	59837628	59840223	2596	+	ENSG00000062716	ENST00000591782	0	VMP1	vacuole membrane protein 1 [Source:HGNC Symbol;Acc:HGNC:29559]
17	59837345	59846502	9158	WT_un_S5_peak_3535e	460	17.5151	46.0939	41.5291	3496	Promoter (<=1kb)	59837628	59840223	2596	+	ENSG00000062716	ENST00000591782	0	VMP1	vacuole membrane protein 1 [Source:HGNC Symbol;Acc:HGNC:29559]
17	59837345	59846502	9158	WT_un_S5_peak_3535f	375	15.6014	37.5046	33.0915	4015	Promoter (<=1kb)	59837628	59840223	2596	+	ENSG00000062716	ENST00000591782	0	VMP1	vacuole membrane protein 1 [Source:HGNC Symbol;Acc:HGNC:29559]
17	59837345	59846502	9158	WT_un_S5_peak_3535g	372	16.0459	37.2986	32.8913	4551	Promoter (<=1kb)	59837628	59840223	2596	+	ENSG00000062716	ENST00000591782	0	VMP1	vacuole membrane protein 1 [Source:HGNC Symbol;Acc:HGNC:29559]
17	59837345	59846502	9158	WT_un_S5_peak_3535h	783	23.1444	78.3182	73.2801	5201	Promoter (<=1kb)	59837628	59840223	2596	+	ENSG00000062716	ENST00000591782	0	VMP1	vacuole membrane protein 1 [Source:HGNC Symbol;Acc:HGNC:29559]
17	59837345	59846502	9158	WT_un_S5_peak_3535i	1217	37.4884	121.702	116.187	6369	Promoter (<=1kb)	59837628	59840223	2596	+	ENSG00000062716	ENST00000591782	0	VMP1	vacuole membrane protein 1 [Source:HGNC Symbol;Acc:HGNC:29559]
17	59837345	59846502	9158	WT_un_S5_peak_3535j	459	17.1375	45.9619	41.3981	6845	Promoter (<=1kb)	59837628	59840223	2596	+	ENSG00000062716	ENST00000591782	0	VMP1	vacuole membrane protein 1 [Source:HGNC Symbol;Acc:HGNC:29559]
17	59837345	59846502	9158	WT_un_S5_peak_3535k	117	5.55358	11.7967	8.07046	7772	Promoter (<=1kb)	59837628	59840223	2596	+	ENSG00000062716	ENST00000591782	0	VMP1	vacuole membrane protein 1 [Source:HGNC Symbol;Acc:HGNC:29559]
17	59837345	59846502	9158	WT_un_S5_peak_3535l	75	4.89556	7.53305	4.06575	8278	Promoter (<=1kb)	59837628	59840223	2596	+	ENSG00000062716	ENST00000591782	0	VMP1	vacuole membrane protein 1 [Source:HGNC Symbol;Acc:HGNC:29559]
17	60526104	60526425	322	WT_un_S5_peak_3537	38	3.19528	3.81524	0.77032	131	Promoter (<=1kb)	60443158	60526242	83085	-	ENSG00000062725	ENST00000083182	0	APPBP2	amyloid beta precursor protein binding protein 2 [Source:HGNC Symbol;Acc:HGNC:622]
19	50384143	50384672	530	WT_un_S5_peak_4164	43	3.7859	4.31451	1.1925	168	Promoter (<=1kb)	50384204	50418012	33809	+	ENSG00000062822	ENST00000600859	0	POLD1	DNA polymerase delta 1, catalytic subunit [Source:HGNC Symbol;Acc:HGNC:9175]
12	53006254	53006738	485	WT_un_S5_peak_2034	50	3.755	5.08049	1.8432	241	Promoter (<=1kb)	53006282	53021758	15477	+	ENSG00000063046	ENST00000551527	0	EIF4B	eukaryotic translation initiation factor 4B [Source:HGNC Symbol;Acc:HGNC:3285]
19	48618866	48619408	543	WT_un_S5_peak_4139	143	8.20211	14.3388	10.497	332	Promoter (<=1kb)	48619291	48630406	11116	+	ENSG00000063176	ENST00000340932	0	SPHK2	sphingosine kinase 2 [Source:HGNC Symbol;Acc:HGNC:18859]
19	55655069	55655398	330	WT_un_S5_peak_4201	36	3.33918	3.68213	0.6488	190	Promoter (<=1kb)	55655082	55661317	6236	+	ENSG00000063244	ENST00000588850	0	U2AF2	U2 small nuclear RNA auxiliary factor 2 [Source:HGNC Symbol;Acc:HGNC:23156]
5	368656	368924	269	WT_un_S5_peak_6202	30	3.07892	3.00838	0.11344	255	3' UTR	343528	353911	10384	+	ENSG00000063438	ENST00000504625	25128	AHRR	aryl-hydrocarbon receptor repressor [Source:HGNC Symbol;Acc:HGNC:346]
X	150689312	150689756	445	WT_un_S5_peak_8700	44	4.19238	4.45165	1.28046	192	Distal Intergenic	150692971	150731475	38505	+	ENSG00000063601	ENST00000493995	-3215	MTMR1	myotubularin related protein 1 [Source:HGNC Symbol;Acc:HGNC:7449]
X	150693235	150693656	422	WT_un_S5_peak_8701	23	2.78918	2.30424	0	74	Promoter (<=1kb)	150693366	150765102	71737	+	ENSG00000063601	ENST00000485376	0	MTMR1	myotubularin related protein 1 [Source:HGNC Symbol;Acc:HGNC:7449]
2	240374288	240374624	337	WT_un_S5_peak_4789	32	3.23733	3.22608	0.28631	175	Distal Intergenic	240435663	240468076	32414	+	ENSG00000063660	ENST00000264039	-61039	GPC1	glypican 1 [Source:HGNC Symbol;Acc:HGNC:4449]
12	26938271	26938785	515	WT_un_S5_peak_1933	53	3.21107	5.31046	2.05735	202	Promoter (<=1kb)	26925761	26938304	12544	-	ENSG00000064102	ENST00000544548	0	INTS13	integrator complex subunit 13 [Source:HGNC Symbol;Acc:HGNC:20174]
8	119832556	119833165	610	WT_un_S5_peak_8118	75	4.66745	7.53305	4.06575	156	Promoter (<=1kb)	119730774	119832841	102068	-	ENSG00000064313	ENST00000378164	0	TAF2	TATA-box binding protein associated factor 2 [Source:HGNC Symbol;Acc:HGNC:11536]
7	139681006	139681280	275	WT_un_S5_peak_7712	44	3.82659	4.45165	1.28046	209	Intron (ENST00000406875/ENSG00000064393, intron 2 of 14)	139583524	139717013	133490	-	ENSG00000064393	ENST00000342645	35733	HIPK2	homeodomain interacting protein kinase 2 [Source:HGNC Symbol;Acc:HGNC:14402]
7	139682321	139683006	686	WT_un_S5_peak_7713	32	3.23733	3.22608	0.28631	137	Intron (ENST00000406875/ENSG00000064393, intron 2 of 14)	139583524	139717013	133490	-	ENSG00000064393	ENST00000342645	34007	HIPK2	homeodomain interacting protein kinase 2 [Source:HGNC Symbol;Acc:HGNC:14402]
7	129054581	129055398	818	WT_un_S5_peak_7672	97	6.75288	9.74924	6.13049	262	Promoter (<=1kb)	128954180	129055173	100994	-	ENSG00000064419	ENST00000627585	0	TNPO3	transportin 3 [Source:HGNC Symbol;Acc:HGNC:17103]
5	128083528	128083798	271	WT_un_S5_peak_6631	29	2.64517	2.95763	0.06978	115	Promoter (<=1kb)	128083766	128189677	105912	+	ENSG00000064651	ENST00000262461	0	SLC12A2	solute carrier family 12 member 2 [Source:HGNC Symbol;Acc:HGNC:10911]
19	1026301	1026731	431	WT_un_S5_peak_3811	24	2.303	2.41987	0	276	Promoter (<=1kb)	1026586	1032695	6110	+	ENSG00000064666	ENST00000562015	0	CNN2	calponin 2 [Source:HGNC Symbol;Acc:HGNC:2156]
15	83067145	83067462	318	WT_un_S5_peak_2969	35	2.98733	3.53412	0.53357	140	Promoter (<=1kb)	83016423	83067252	50830	-	ENSG00000064726	ENST00000261721	0	BTBD1	BTB domain containing 1 [Source:HGNC Symbol;Acc:HGNC:1120]
2	189783919	189784598	680	WT_un_S5_peak_4645	69	5.29033	6.95301	3.52892	392	Promoter (<=1kb)	189784085	189864359	80275	+	ENSG00000064933	ENST00000639501	0	PMS1	PMS1 homolog 1, mismatch repair system component [Source:HGNC Symbol;Acc:HGNC:9121]
6	34887829	34888320	492	WT_un_S5_peak_7069	59	4.94817	5.94877	2.6174	289	Promoter (<=1kb)	34877462	34888027	10566	-	ENSG00000064995	ENST00000650109	0	TAF11	TATA-box binding protein associated factor 11 [Source:HGNC Symbol;Acc:HGNC:11544]
6	34888921	34889231	311	WT_un_S5_peak_7070	26	3.09502	2.69119	0	88	Promoter (<=1kb)	34889255	35091406	202152	+	ENSG00000064999	ENST00000360359	-24	ANKS1A	ankyrin repeat and sterile alpha motif domain containing 1A [Source:HGNC Symbol;Acc:HGNC:20961]
1	109548167	109548966	800	WT_un_S5_peak_450	190	10.1089	19.0631	15.0526	298	Promoter (<=1kb)	109548615	109600195	51581	+	ENSG00000065135	ENST00000369851	0	GNAI3	G protein subunit alpha i3 [Source:HGNC Symbol;Acc:HGNC:4387]
1	117929194	117929775	582	WT_un_S5_peak_483	76	5.4263	7.67804	4.19448	293	Promoter (<=1kb)	117929720	117941788	12069	+	ENSG00000065183	ENST00000369441	0	WDR3	WD repeat domain 3 [Source:HGNC Symbol;Acc:HGNC:12755]
1	88684050	88684509	460	WT_un_S5_peak_373	86	5.35667	8.68165	5.12359	242	Promoter (<=1kb)	88684222	88806268	122047	+	ENSG00000065243	ENST00000316005	0	PKN2	protein kinase N2 [Source:HGNC Symbol;Acc:HGNC:9406]
12	55939092	55939509	418	WT_un_S5_peak_2057	35	3.46081	3.53919	0.53357	282	Promoter (<=1kb)	55939281	55941326	2046	+	ENSG00000065357	ENST00000554434	0	DGKA	diacylglycerol kinase alpha [Source:HGNC Symbol;Acc:HGNC:2849]
16	75647394	75648008	615	WT_un_S5_peak_3197	103	6.4125	10.3941	6.74275	355	Promoter (<=1kb)	75627474	75647665	20192	-	ENSG00000065427	ENST00000319410	0	KARS1	lysyl-tRNA synthetase 1 [Source:HGNC Symbol;Acc:HGNC:6215]
16	75622991	75623289	299	WT_un_S5_peak_3196	66	5.03788	6.63423	3.24457	233	Promoter (<=1kb)	75596868	75623281	26414	-	ENSG00000065457	ENST00000564657	0	ADAT1	adenosine deaminase tRNA specific 1 [Source:HGNC Symbol;Acc:HGNC:228]
6	37257695	37258160	466	WT_un_S5_peak_7090	59	4.606	5.94877	2.6174	156	Promoter (<=1kb)	37257772	37332970	75199	+	ENSG00000065491	ENST00000373491	0	TBC1D22B	TBC1 domain family member 22B [Source:HGNC Symbol;Acc:HGNC:21602]
1	15835516	15835830	315	WT_un_S5_peak_62	30	2.91575	3.07188	0.16046	287	Promoter (<=1kb)	15836095	15928557	92463	+	ENSG00000065526	ENST00000673875	-265	SPEN	spen family transcriptional repressor [Source:HGNC Symbol;Acc:HGNC:17575]
2	186485650	186486798	1149	WT_un_S5_peak_4631a	43	3.52689	4.33257	1.20064	240	Promoter (<=1kb)	186486253	186506091	19839	+	ENSG00000065548	ENST00000421536	0	ZC3H15	zinc finger CCCH-type containing 15 [Source:HGNC Symbol;Acc:HGNC:29528]
2	186485650	186486798	1149	WT_un_S5_peak_4631b	86	6.3871	8.60744	5.05654	637	Promoter (<=1kb)	186486253	186506091	19839	+	ENSG00000065548	ENST00000421536	0	ZC3H15	zinc finger CCCH-type containing 15 [Source:HGNC Symbol;Acc:HGNC:29528]
10	104074336	104074604	269	WT_un_S5_peak_1171	44	3.82659	4.45165	1.28046	131	Intron (ENST00000369733/ENSG00000065618, intron 4 of 50)	104070461	104080654	10194	-	ENSG00000065618	ENST00000483876	6050	COL17A1	collagen type XVII alpha 1 chain [Source:HGNC Symbol;Acc:HGNC:2194]
10	104268725	104269591	867	WT_un_S5_peak_1176	49	4.26383	4.98931	1.76911	362	Promoter (<=1kb)	104268873	104299417	30545	+	ENSG00000065621	ENST00000450629	0	GSTO2	glutathione S-transferase omega 2 [Source:HGNC Symbol;Acc:HGNC:23064]
7	39949159	39950235	1077	WT_un_S5_peak_7523a	73	5.15113	7.31446	3.87344	195	Promoter (<=1kb)	39950121	40095555	145435	+	ENSG00000065883	ENST00000340829	0	CDK13	cyclin dependent kinase 13 [Source:HGNC Symbol;Acc:HGNC:1733]
7	39949159	39950235	1077	WT_un_S5_peak_7523b	46	3.99126	4.60285	1.42296	483	Promoter (<=1kb)	39950121	40095555	145435	+	ENSG00000065883	ENST00000340829	0	CDK13	cyclin dependent kinase 13 [Source:HGNC Symbol;Acc:HGNC:1733]
2	74198334	74199422	1089	WT_un_S5_peak_4411	93	5.35178	9.31879	5.72445	597	Promoter (<=1kb)	74198610	74215298	16689	+	ENSG00000065911	ENST00000409804	0	MTHFD2	methylenetetrahydrofolate dehydrogenase (NADP+ dependent) 2, methenyltetrahydrofolate cyclohydrolase [Source:HGNC Symbol;Acc:HGNC:7434]
12	8026628	8027203	576	WT_un_S5_peak_1882	55	4.30545	5.56137	2.27686	386	Distal Intergenic	8032716	8055517	22802	+	ENSG00000065970	ENST00000162391	-5513	FOXJ2	forkhead box J2 [Source:HGNC Symbol;Acc:HGNC:24818]
1	42681999	42682659	661	WT_un_S5_peak_210	97	4.78764	9.73493	6.1238	457	Promoter (<=1kb)	42682418	42703805	21388	+	ENSG00000065978	ENST00000321358	0	YBX1	Y-box binding protein 1 [Source:HGNC Symbol;Acc:HGNC:8014]
12	50084972	50085384	413	WT_un_S5_peak_2012	43	3.5241	4.31451	1.1925	239	Promoter (<=1kb)	50085200	50100642	15443	+	ENSG00000066117	ENST00000381513	0	SMARCD1	SWI/SNF related, matrix associated, actin dependent regulator of chromatin, subfamily d, member 1 [Source:HGNC Symbol;Acc:HGNC:11106]
1	43650335	43650792	458	WT_un_S5_peak_221	84	5.12367	8.41215	4.886	242	Promoter (<=1kb)	43650536	43667021	16486	+	ENSG00000066135	ENST00000463151	0	KDM4A	lysine demethylase 4A [Source:HGNC Symbol;Acc:HGNC:22978]
1	40691428	40692337	910	WT_un_S5_peak_200	143	8.20211	14.3388	10.497	616	Promoter (<=1kb)	40691648	40758448	66801	+	ENSG00000066136	ENST00000467203	0	NFYC	nuclear transcription factor Y subunit gamma [Source:HGNC Symbol;Acc:HGNC:7806]
6	30060835	30061532	698	WT_un_S5_peak_7002	49	4.22019	4.92356	1.71247	316	Promoter (<=1kb)	30061257	30064909	3653	+	ENSG00000066379	ENST00000376782	0	POLR1H	RNA polymerase I subunit H [Source:HGNC Symbol;Acc:HGNC:13182]
3	101679333	101679723	391	WT_un_S5_peak_5638	40	3.5795	4.07966	0.98433	239	Promoter (2-3kb)	101648889	101677132	28244	-	ENSG00000066422	ENST00000312938	-2201	ZBTB11	zinc finger and BTB domain containing 11 [Source:HGNC Symbol;Acc:HGNC:16740]
14	92794175	92794520	346	WT_un_S5_peak_2722	40	3.63653	4.09083	0.99096	187	Promoter (<=1kb)	92794305	92839947	45643	+	ENSG00000066455	ENST00000163416	0	GOLGA5	golgin A5 [Source:HGNC Symbol;Acc:HGNC:4428]
1	70205465	70205749	285	WT_un_S5_peak_321	25	2.38987	2.54672	0	268	Promoter (<=1kb)	70144805	70205579	60775	-	ENSG00000066557	ENST00000370952	0	LRRC40	leucine rich repeat containing 40 [Source:HGNC Symbol;Acc:HGNC:26004]
6	125986223	125986739	517	WT_un_S5_peak_7297	59	4.606	5.94877	2.6174	161	Promoter (<=1kb)	125986479	126008480	22002	+	ENSG00000066651	ENST00000461129	0	TRMT11	tRNA methyltransferase 11 homolog [Source:HGNC Symbol;Acc:HGNC:21080]
16	20741600	20741890	291	WT_un_S5_peak_3062	40	3.5795	4.07966	0.98433	202	Promoter (<=1kb)	20702816	20741815	39000	-	ENSG00000066654	ENST00000636554	0	THUMPD1	THUMP domain containing 1 [Source:HGNC Symbol;Acc:HGNC:23807]
16	20744136	20744404	269	WT_un_S5_peak_3063	32	3.23733	3.22608	0.28631	208	Promoter (2-3kb)	20733664	20742084	8421	-	ENSG00000066654	ENST00000381337	-2052	THUMPD1	THUMP domain containing 1 [Source:HGNC Symbol;Acc:HGNC:23807]
8	134712536	134713283	748	WT_un_S5_peak_8177a	56	4.76702	5.69186	2.39319	194	Promoter (<=1kb)	134477788	134713031	235244	-	ENSG00000066827	ENST00000377838	0	ZFAT	zinc finger and AT-hook domain containing [Source:HGNC Symbol;Acc:HGNC:19899]
8	134712536	134713283	748	WT_un_S5_peak_8177b	28	2.73872	2.85297	0	667	Promoter (<=1kb)	134477788	134713031	235244	-	ENSG00000066827	ENST00000377838	0	ZFAT	zinc finger and AT-hook domain containing [Source:HGNC Symbol;Acc:HGNC:19899]
10	1048590	1049345	756	WT_un_S5_peak_907	121	7.48446	12.1335	8.38243	330	Promoter (<=1kb)	1039152	1048883	9732	-	ENSG00000067064	ENST00000429642	0	IDI1	isopentenyl-diphosphate delta isomerase 1 [Source:HGNC Symbol;Acc:HGNC:5387]
10	3773588	3776333	2746	WT_un_S5_peak_914a	64	4.92395	6.43923	3.05901	324	3' UTR	3775996	3780217	4222	-	ENSG00000067082	ENST00000461124	3884	KLF6	Kruppel like factor 6 [Source:HGNC Symbol;Acc:HGNC:2235]
10	3773588	3776333	2746	WT_un_S5_peak_914b	86	6.3871	8.60744	5.05654	975	3' UTR	3775996	3780217	4222	-	ENSG00000067082	ENST00000461124	3884	KLF6	Kruppel like factor 6 [Source:HGNC Symbol;Acc:HGNC:2235]
10	3773588	3776333	2746	WT_un_S5_peak_914c	121	7.85024	12.1335	8.38243	1383	3' UTR	3775996	3780217	4222	-	ENSG00000067082	ENST00000461124	3884	KLF6	Kruppel like factor 6 [Source:HGNC Symbol;Acc:HGNC:2235]
10	3773588	3776333	2746	WT_un_S5_peak_914d	101	6.659	10.1966	6.55518	1971	3' UTR	3775996	3780217	4222	-	ENSG00000067082	ENST00000461124	3884	KLF6	Kruppel like factor 6 [Source:HGNC Symbol;Acc:HGNC:2235]
10	3773588	3776333	2746	WT_un_S5_peak_914e	54	4.55817	5.42044	2.14934	2483	3' UTR	3775996	3780217	4222	-	ENSG00000067082	ENST00000461124	3884	KLF6	Kruppel like factor 6 [Source:HGNC Symbol;Acc:HGNC:2235]
10	3776741	3777296	556	WT_un_S5_peak_915	44	3.82659	4.45165	1.28046	165	Promoter (2-3kb)	3775996	3780217	4222	-	ENSG00000067082	ENST00000461124	2921	KLF6	Kruppel like factor 6 [Source:HGNC Symbol;Acc:HGNC:2235]
10	3777455	3777753	299	WT_un_S5_peak_916	54	4.55817	5.42044	2.14934	149	Promoter (2-3kb)	3775996	3780217	4222	-	ENSG00000067082	ENST00000461124	2464	KLF6	Kruppel like factor 6 [Source:HGNC Symbol;Acc:HGNC:2235]
10	3778007	3779044	1038	WT_un_S5_peak_917a	54	4.55817	5.42044	2.14934	177	Promoter (1-2kb)	3775996	3780217	4222	-	ENSG00000067082	ENST00000461124	1173	KLF6	Kruppel like factor 6 [Source:HGNC Symbol;Acc:HGNC:2235]
10	3778007	3779044	1038	WT_un_S5_peak_917b	44	4.19238	4.45165	1.28046	618	Promoter (1-2kb)	3775996	3780217	4222	-	ENSG00000067082	ENST00000461124	1173	KLF6	Kruppel like factor 6 [Source:HGNC Symbol;Acc:HGNC:2235]
10	3779199	3781244	2046	WT_un_S5_peak_918a	44	4.19238	4.45165	1.28046	312	Promoter (<=1kb)	3775996	3780217	4222	-	ENSG00000067082	ENST00000461124	0	KLF6	Kruppel like factor 6 [Source:HGNC Symbol;Acc:HGNC:2235]
10	3779199	3781244	2046	WT_un_S5_peak_918b	76	5.75594	7.67804	4.19448	1172	Promoter (<=1kb)	3775996	3780217	4222	-	ENSG00000067082	ENST00000461124	0	KLF6	Kruppel like factor 6 [Source:HGNC Symbol;Acc:HGNC:2235]
10	3779199	3781244	2046	WT_un_S5_peak_918c	43	3.52689	4.33257	1.20064	1560	Promoter (<=1kb)	3775996	3780217	4222	-	ENSG00000067082	ENST00000461124	0	KLF6	Kruppel like factor 6 [Source:HGNC Symbol;Acc:HGNC:2235]
10	3779199	3781244	2046	WT_un_S5_peak_918d	79	5.97467	7.99793	4.48953	1826	Promoter (<=1kb)	3775996	3780217	4222	-	ENSG00000067082	ENST00000461124	0	KLF6	Kruppel like factor 6 [Source:HGNC Symbol;Acc:HGNC:2235]
10	3781397	3786992	5596	WT_un_S5_peak_919a	121	7.48446	12.1335	8.38243	279	Promoter (<=1kb)	3775996	3785209	9214	-	ENSG00000067082	ENST00000497571	0	KLF6	Kruppel like factor 6 [Source:HGNC Symbol;Acc:HGNC:2235]
10	3781397	3786992	5596	WT_un_S5_peak_919b	101	6.659	10.1966	6.55518	692	Promoter (<=1kb)	3775996	3785209	9214	-	ENSG00000067082	ENST00000497571	0	KLF6	Kruppel like factor 6 [Source:HGNC Symbol;Acc:HGNC:2235]
10	3781397	3786992	5596	WT_un_S5_peak_919c	97	6.75288	9.74924	6.13049	1030	Promoter (<=1kb)	3775996	3785209	9214	-	ENSG00000067082	ENST00000497571	0	KLF6	Kruppel like factor 6 [Source:HGNC Symbol;Acc:HGNC:2235]
10	3781397	3786992	5596	WT_un_S5_peak_919d	149	8.712	14.9606	11.0884	1381	Promoter (<=1kb)	3775996	3785209	9214	-	ENSG00000067082	ENST00000497571	0	KLF6	Kruppel like factor 6 [Source:HGNC Symbol;Acc:HGNC:2235]
10	3781397	3786992	5596	WT_un_S5_peak_919e	313	14.871	31.3661	27.0694	2236	Promoter (<=1kb)	3775996	3785209	9214	-	ENSG00000067082	ENST00000497571	0	KLF6	Kruppel like factor 6 [Source:HGNC Symbol;Acc:HGNC:2235]
10	3781397	3786992	5596	WT_un_S5_peak_919f	227	12.2397	22.7334	18.6211	2832	Promoter (<=1kb)	3775996	3785209	9214	-	ENSG00000067082	ENST00000497571	0	KLF6	Kruppel like factor 6 [Source:HGNC Symbol;Acc:HGNC:2235]
10	3781397	3786992	5596	WT_un_S5_peak_919g	303	11.967	30.322	26.0438	3716	Promoter (<=1kb)	3775996	3785209	9214	-	ENSG00000067082	ENST00000497571	0	KLF6	Kruppel like factor 6 [Source:HGNC Symbol;Acc:HGNC:2235]
10	3781397	3786992	5596	WT_un_S5_peak_919h	266	10.8264	26.6287	22.4258	4249	Promoter (<=1kb)	3775996	3785209	9214	-	ENSG00000067082	ENST00000497571	0	KLF6	Kruppel like factor 6 [Source:HGNC Symbol;Acc:HGNC:2235]
10	3781397	3786992	5596	WT_un_S5_peak_919i	93	5.35178	9.31879	5.72445	4713	Promoter (<=1kb)	3775996	3785209	9214	-	ENSG00000067082	ENST00000497571	0	KLF6	Kruppel like factor 6 [Source:HGNC Symbol;Acc:HGNC:2235]
10	3781397	3786992	5596	WT_un_S5_peak_919j	76	5.4263	7.67804	4.19448	5295	Promoter (<=1kb)	3775996	3785209	9214	-	ENSG00000067082	ENST00000497571	0	KLF6	Kruppel like factor 6 [Source:HGNC Symbol;Acc:HGNC:2235]
10	3787323	3787636	314	WT_un_S5_peak_920	32	3.23733	3.22608	0.28631	227	Promoter (2-3kb)	3775997	3785281	9285	-	ENSG00000067082	ENST00000542957	-2042	KLF6	Kruppel like factor 6 [Source:HGNC Symbol;Acc:HGNC:2235]
12	6333789	6334114	326	WT_un_S5_peak_1860	56	4.13911	5.68722	2.39319	161	Promoter (<=1kb)	6331872	6334244	2373	-	ENSG00000067182	ENST00000437813	130	TNFRSF1A	TNF receptor superfamily member 1A [Source:HGNC Symbol;Acc:HGNC:11916]
12	6336531	6337541	1011	WT_un_S5_peak_1861	56	4.76702	5.69186	2.39319	287	Promoter (2-3kb)	6331872	6334244	2373	-	ENSG00000067182	ENST00000437813	-2287	TNFRSF1A	TNF receptor superfamily member 1A [Source:HGNC Symbol;Acc:HGNC:11916]
1	92784624	92785266	643	WT_un_S5_peak_385	69	4.88333	6.90638	3.48859	349	Promoter (<=1kb)	92508696	92785107	276412	-	ENSG00000067208	ENST00000684568	0	EVI5	ecotropic viral integration site 5 [Source:HGNC Symbol;Acc:HGNC:3501]
15	72220760	72221104	345	WT_un_S5_peak_2940	26	2.72923	2.69119	0	157	Promoter (1-2kb)	72209733	72219425	9693	-	ENSG00000067225	ENST00000564178	-1335	PKM	pyruvate kinase M1/2 [Source:HGNC Symbol;Acc:HGNC:9021]
15	72222304	72223298	995	WT_un_S5_peak_2941	35	3.46081	3.53919	0.53357	251	Promoter (<=1kb)	72209751	72222531	12781	-	ENSG00000067225	ENST00000562997	0	PKM	pyruvate kinase M1/2 [Source:HGNC Symbol;Acc:HGNC:9021]
15	72223826	72224383	558	WT_un_S5_peak_2942	40	3.5795	4.07966	0.98433	120	Promoter (1-2kb)	72209751	72222531	12781	-	ENSG00000067225	ENST00000562997	-1295	PKM	pyruvate kinase M1/2 [Source:HGNC Symbol;Acc:HGNC:9021]
15	72225543	72226117	575	WT_un_S5_peak_2943	35	3.46081	3.53919	0.53357	336	Promoter (2-3kb)	72200508	72228676	28169	-	ENSG00000067225	ENST00000561609	2559	PKM	pyruvate kinase M1/2 [Source:HGNC Symbol;Acc:HGNC:9021]
15	72226331	72229783	3453	WT_un_S5_peak_2944a	66	5.09666	6.66465	3.27049	580	Promoter (<=1kb)	72199629	72229722	30094	-	ENSG00000067225	ENST00000568459	0	PKM	pyruvate kinase M1/2 [Source:HGNC Symbol;Acc:HGNC:9021]
15	72226331	72229783	3453	WT_un_S5_peak_2944b	44	4.19238	4.45165	1.28046	1046	Promoter (<=1kb)	72199629	72229722	30094	-	ENSG00000067225	ENST00000568459	0	PKM	pyruvate kinase M1/2 [Source:HGNC Symbol;Acc:HGNC:9021]
15	72226331	72229783	3453	WT_un_S5_peak_2944c	54	4.55817	5.42044	2.14934	2444	Promoter (<=1kb)	72199629	72229722	30094	-	ENSG00000067225	ENST00000568459	0	PKM	pyruvate kinase M1/2 [Source:HGNC Symbol;Acc:HGNC:9021]
15	72230356	72231599	1244	WT_un_S5_peak_2945	285	14.0686	28.531	24.288	806	Promoter (<=1kb)	72199029	72231190	32162	-	ENSG00000067225	ENST00000335181	0	PKM	pyruvate kinase M1/2 [Source:HGNC Symbol;Acc:HGNC:9021]
1	93878853	93879457	605	WT_un_S5_peak_396	102	5.808	10.2513	6.60447	377	Promoter (<=1kb)	93866284	93879206	12923	-	ENSG00000067334	ENST00000436063	0	DNTTIP2	deoxynucleotidyltransferase terminal interacting protein 2 [Source:HGNC Symbol;Acc:HGNC:24013]
16	8621552	8621836	285	WT_un_S5_peak_3039	41	3.63696	4.16545	1.05527	128	Promoter (<=1kb)	8621683	8628808	7126	+	ENSG00000067365	ENST00000563958	0	METTL22	methyltransferase like 22 [Source:HGNC Symbol;Acc:HGNC:28368]
1	218284922	218285572	651	WT_un_S5_peak_802	59	4.606	5.94877	2.6174	405	Promoter (<=1kb)	218285293	218337983	52691	+	ENSG00000067533	ENST00000366932	0	RRP15	ribosomal RNA processing 15 homolog [Source:HGNC Symbol;Acc:HGNC:24255]
3	49412030	49412524	495	WT_un_S5_peak_5522	47	3.3295	4.79185	1.59279	302	Promoter (<=1kb)	49373240	49412097	38858	-	ENSG00000067560	ENST00000431929	0	RHOA	ras homolog family member A [Source:HGNC Symbol;Acc:HGNC:667]
7	67302185	67302874	690	WT_un_S5_peak_7572	24	2.303	2.41987	0	442	Promoter (<=1kb)	67287541	67302419	14879	-	ENSG00000067601	ENST00000414507	0	PMS2P4	PMS1 homolog 2, mismatch repair system component pseudogene 4 [Source:HGNC Symbol;Acc:HGNC:9129]
12	77805066	77805334	269	WT_un_S5_peak_2161	24	2.553	2.43654	0	94	Intron (ENST00000550042/ENSG00000067798, intron 2 of 8)	77830894	78213010	382117	+	ENSG00000067798	ENST00000397909	-25560	NAV3	neuron navigator 3 [Source:HGNC Symbol;Acc:HGNC:15998]
12	77940038	77940403	366	WT_un_S5_peak_2162	26	3.09502	2.69119	0	141	Promoter (<=1kb)	77940267	77950895	10629	+	ENSG00000067798	ENST00000549369	0	NAV3	neuron navigator 3 [Source:HGNC Symbol;Acc:HGNC:15998]
X	153794279	153794917	639	WT_un_S5_peak_8706a	30	3.11882	3.06293	0.15335	115	Promoter (<=1kb)	153785766	153794512	8747	-	ENSG00000067829	ENST00000370092	0	IDH3G	isocitrate dehydrogenase (NAD(+)) 3 non-catalytic subunit gamma [Source:HGNC Symbol;Acc:HGNC:5386]
X	153794279	153794917	639	WT_un_S5_peak_8706b	47	4.10774	4.76379	1.57115	449	Promoter (<=1kb)	153785766	153794512	8747	-	ENSG00000067829	ENST00000370092	0	IDH3G	isocitrate dehydrogenase (NAD(+)) 3 non-catalytic subunit gamma [Source:HGNC Symbol;Acc:HGNC:5386]
2	239401428	239401929	502	WT_un_S5_peak_4787	44	3.82659	4.45165	1.28046	306	Promoter (<=1kb)	239094574	239401654	307081	-	ENSG00000068024	ENST00000493582	0	HDAC4	histone deacetylase 4 [Source:HGNC Symbol;Acc:HGNC:14063]
17	43006766	43007043	278	WT_un_S5_peak_3399	30	3.16327	3.06762	0.1564	109	Promoter (<=1kb)	43006784	43014456	7673	+	ENSG00000068079	ENST00000415816	0	IFI35	interferon induced protein 35 [Source:HGNC Symbol;Acc:HGNC:5399]
X	48958000	48958338	339	WT_un_S5_peak_8616	64	4.92395	6.43923	3.05901	168	Promoter (<=1kb)	48922943	48958386	35444	-	ENSG00000068308	ENST00000428668	48	OTUD5	OTU deubiquitinase 5 [Source:HGNC Symbol;Acc:HGNC:25402]
X	49042020	49042288	269	WT_un_S5_peak_8617	24	2.553	2.43654	0	83	Promoter (1-2kb)	49028726	49043357	14632	-	ENSG00000068323	ENST00000315869	1069	TFE3	transcription factor binding to IGHM enhancer 3 [Source:HGNC Symbol;Acc:HGNC:11752]
X	49042752	49043479	728	WT_un_S5_peak_8618	43	3.73916	4.31906	1.1948	476	Promoter (<=1kb)	49028726	49043357	14632	-	ENSG00000068323	ENST00000315869	0	TFE3	transcription factor binding to IGHM enhancer 3 [Source:HGNC Symbol;Acc:HGNC:11752]
X	109732922	109733561	640	WT_un_S5_peak_8672	64	4.92395	6.43923	3.05901	233	Promoter (<=1kb)	109641335	109733257	91923	-	ENSG00000068366	ENST00000469796	0	ACSL4	acyl-CoA synthetase long chain family member 4 [Source:HGNC Symbol;Acc:HGNC:3571]
X	48475901	48476741	841	WT_un_S5_peak_8603	146	8.58182	14.6369	10.775	519	Promoter (<=1kb)	48476021	48486364	10344	+	ENSG00000068438	ENST00000396894	0	FTSJ1	FtsJ RNA 2'-O-methyltransferase 1 [Source:HGNC Symbol;Acc:HGNC:13254]
X	48487181	48488221	1041	WT_un_S5_peak_8604	66	4.43933	6.6833	3.28307	586	Distal Intergenic	48481632	48485984	4353	+	ENSG00000068438	ENST00000489599	5549	FTSJ1	FtsJ RNA 2'-O-methyltransferase 1 [Source:HGNC Symbol;Acc:HGNC:13254]
2	85997826	85998175	350	WT_un_S5_peak_4435	23	2.45954	2.30424	0	116	Distal Intergenic	86027966	86028799	834	-	ENSG00000068654	ENST00000471427	30624	POLR1A	RNA polymerase I subunit A [Source:HGNC Symbol;Acc:HGNC:17264]
2	86105972	86106404	433	WT_un_S5_peak_4436	36	3.07067	3.62443	0.59626	369	Promoter (<=1kb)	86026328	86106155	79828	-	ENSG00000068654	ENST00000409681	0	POLR1A	RNA polymerase I subunit A [Source:HGNC Symbol;Acc:HGNC:17264]
2	46940526	46941242	717	WT_un_S5_peak_4363	35	2.81625	3.53412	0.53357	676	Promoter (<=1kb)	46941224	47076123	134900	+	ENSG00000068724	ENST00000319190	0	TTC7A	tetratricopeptide repeat domain 7A [Source:HGNC Symbol;Acc:HGNC:19750]
2	46992345	46992727	383	WT_un_S5_peak_4364	24	2.55901	2.44511	0	230	Promoter (1-2kb)	46994231	47075324	81094	+	ENSG00000068724	ENST00000484061	-1504	TTC7A	tetratricopeptide repeat domain 7A [Source:HGNC Symbol;Acc:HGNC:19750]
2	47033591	47034229	639	WT_un_S5_peak_4365a	54	4.55817	5.42044	2.14934	153	Promoter (<=1kb)	47034155	47060956	26802	+	ENSG00000068724	ENST00000484337	0	TTC7A	tetratricopeptide repeat domain 7A [Source:HGNC Symbol;Acc:HGNC:19750]
2	47033591	47034229	639	WT_un_S5_peak_4365b	49	4.26383	4.98931	1.76911	485	Promoter (<=1kb)	47034155	47060956	26802	+	ENSG00000068724	ENST00000484337	0	TTC7A	tetratricopeptide repeat domain 7A [Source:HGNC Symbol;Acc:HGNC:19750]
2	47043015	47043989	975	WT_un_S5_peak_4366a	59	4.94817	5.94877	2.6174	288	Promoter (2-3kb)	47046315	47050827	4513	+	ENSG00000068724	ENST00000496991	-2326	TTC7A	tetratricopeptide repeat domain 7A [Source:HGNC Symbol;Acc:HGNC:19750]
2	47043015	47043989	975	WT_un_S5_peak_4366b	53	4.51749	5.36032	2.10295	625	Promoter (2-3kb)	47046315	47050827	4513	+	ENSG00000068724	ENST00000496991	-2326	TTC7A	tetratricopeptide repeat domain 7A [Source:HGNC Symbol;Acc:HGNC:19750]
3	48716891	48717287	397	WT_un_S5_peak_5509	75	4.99213	7.57615	4.10619	224	Promoter (<=1kb)	48688003	48717221	29219	-	ENSG00000068745	ENST00000328631	0	IP6K2	inositol hexakisphosphate kinase 2 [Source:HGNC Symbol;Acc:HGNC:17313]
2	45610446	45611506	1061	WT_un_S5_peak_4355	58	4.21122	5.86499	2.55229	716	Promoter (<=1kb)	45388680	45611267	222588	-	ENSG00000068784	ENST00000263736	0	SRBD1	S1 RNA binding domain 1 [Source:HGNC Symbol;Acc:HGNC:25521]
5	62306118	62306386	269	WT_un_S5_peak_6397	51	3.47367	5.1139	1.87259	146	Promoter (<=1kb)	62306162	62385676	79515	+	ENSG00000068796	ENST00000401507	0	KIF2A	kinesin family member 2A [Source:HGNC Symbol;Acc:HGNC:6318]
3	160398538	160400193	1656	WT_un_S5_peak_5815a	39	3.8277	3.95231	0.88518	674	Promoter (<=1kb)	160256986	160399225	142240	-	ENSG00000068885	ENST00000326448	0	IFT80	intraflagellar transport 80 [Source:HGNC Symbol;Acc:HGNC:29262]
3	160398538	160400193	1656	WT_un_S5_peak_5815b	194	10.3709	19.4859	15.4671	1204	Promoter (<=1kb)	160256986	160399225	142240	-	ENSG00000068885	ENST00000326448	0	IFT80	intraflagellar transport 80 [Source:HGNC Symbol;Acc:HGNC:29262]
2	53786895	53787360	466	WT_un_S5_peak_4380	40	3.5795	4.07966	0.98433	207	Promoter (<=1kb)	53787044	53794377	7334	+	ENSG00000068912	ENST00000494373	0	ERLEC1	endoplasmic reticulum lectin 1 [Source:HGNC Symbol;Acc:HGNC:25222]
5	66822324	66822599	276	WT_un_S5_peak_6413	38	3.44846	3.88541	0.82322	144	Intron (ENST00000403625/ENSG00000069020, intron 3 of 28)	66828774	67115075	286302	+	ENSG00000069020	ENST00000490016	-6175	MAST4	microtubule associated serine/threonine kinase family member 4 [Source:HGNC Symbol;Acc:HGNC:19037]
5	67004598	67005031	434	WT_un_S5_peak_6414	40	3.63653	4.09083	0.99096	142	Promoter (<=1kb)	67004620	67167051	162432	+	ENSG00000069020	ENST00000261569	0	MAST4	microtubule associated serine/threonine kinase family member 4 [Source:HGNC Symbol;Acc:HGNC:19037]
1	229508019	229508780	762	WT_un_S5_peak_857	160	9.29318	16.0547	12.1449	226	Promoter (<=1kb)	229440259	229508341	68083	-	ENSG00000069248	ENST00000261396	0	NUP133	nucleoporin 133 [Source:HGNC Symbol;Acc:HGNC:18016]
1	205746276	205746609	334	WT_un_S5_peak_763	35	3.46081	3.53919	0.53357	165	Intron (ENST00000367142/ENSG00000069275, intron 1 of 6)	205712822	205750182	37361	-	ENSG00000069275	ENST00000367142	3573	NUCKS1	nuclear casein kinase and cyclin dependent kinase substrate 1 [Source:HGNC Symbol;Acc:HGNC:29923]
1	205748683	205750397	1715	WT_un_S5_peak_764a	66	4.43933	6.6833	3.28307	947	Promoter (<=1kb)	205712822	205750182	37361	-	ENSG00000069275	ENST00000367142	0	NUCKS1	nuclear casein kinase and cyclin dependent kinase substrate 1 [Source:HGNC Symbol;Acc:HGNC:29923]
1	205748683	205750397	1715	WT_un_S5_peak_764b	29	2.84256	2.9599	0.06978	1286	Promoter (<=1kb)	205712822	205750182	37361	-	ENSG00000069275	ENST00000367142	0	NUCKS1	nuclear casein kinase and cyclin dependent kinase substrate 1 [Source:HGNC Symbol;Acc:HGNC:29923]
1	205748683	205750397	1715	WT_un_S5_peak_764c	49	4.21702	4.92149	1.71247	1534	Promoter (<=1kb)	205712822	205750182	37361	-	ENSG00000069275	ENST00000367142	0	NUCKS1	nuclear casein kinase and cyclin dependent kinase substrate 1 [Source:HGNC Symbol;Acc:HGNC:29923]
16	46689003	46689815	813	WT_un_S5_peak_3118a	44	3.82659	4.45165	1.28046	162	Promoter (<=1kb)	46656132	46689178	33047	-	ENSG00000069329	ENST00000299138	0	VPS35	VPS35 retromer complex component [Source:HGNC Symbol;Acc:HGNC:13487]
16	46689003	46689815	813	WT_un_S5_peak_3118b	118	7.31345	11.8532	8.12191	622	Promoter (<=1kb)	46656132	46689178	33047	-	ENSG00000069329	ENST00000299138	0	VPS35	VPS35 retromer complex component [Source:HGNC Symbol;Acc:HGNC:13487]
3	141876496	141876766	271	WT_un_S5_peak_5740	29	2.64517	2.95763	0.06978	190	Promoter (<=1kb)	141876616	141926514	49899	+	ENSG00000069849	ENST00000465172	0	ATP1B3	ATPase Na+/K+ transporting subunit beta 3 [Source:HGNC Symbol;Acc:HGNC:806]
15	55318652	55319354	703	WT_un_S5_peak_2858	30	3.11882	3.06293	0.15335	113	Promoter (<=1kb)	55318960	55355647	36688	+	ENSG00000069943	ENST00000565367	0	PIGB	phosphatidylinositol glycan anchor biosynthesis class B [Source:HGNC Symbol;Acc:HGNC:8959]
15	52019049	52019367	319	WT_un_S5_peak_2852	41	3.67252	4.15481	1.04737	135	Promoter (<=1kb)	52019209	52067359	48151	+	ENSG00000069956	ENST00000681888	0	MAPK6	mitogen-activated protein kinase 6 [Source:HGNC Symbol;Acc:HGNC:6879]
15	52019675	52020004	330	WT_un_S5_peak_2853	27	2.70548	2.76251	0	201	Promoter (<=1kb)	52019922	52046374	26453	+	ENSG00000069956	ENST00000558841	0	MAPK6	mitogen-activated protein kinase 6 [Source:HGNC Symbol;Acc:HGNC:6879]
12	12266819	12267449	631	WT_un_S5_peak_1894	46	4.00398	4.61477	1.43357	46	Promoter (<=1kb)	12116025	12267044	151020	-	ENSG00000070018	ENST00000261349	0	LRP6	LDL receptor related protein 6 [Source:HGNC Symbol;Acc:HGNC:6698]
11	17276359	17276765	407	WT_un_S5_peak_1346	35	2.81625	3.53412	0.53357	218	Promoter (<=1kb)	17276731	17282870	6140	+	ENSG00000070081	ENST00000525637	0	NUCB2	nucleobindin 2 [Source:HGNC Symbol;Acc:HGNC:8044]
3	149969053	149969580	528	WT_un_S5_peak_5762	32	3.2893	3.29821	0.35013	101	Promoter (<=1kb)	149966053	149968905	2853	-	ENSG00000070087	ENST00000497060	-148	PFN2	profilin 2 [Source:HGNC Symbol;Acc:HGNC:8882]
9	109453655	109453923	269	WT_un_S5_peak_8413	34	3.16168	3.46542	0.49354	241	Promoter (2-3kb)	109375694	109451384	75691	-	ENSG00000070159	ENST00000446349	-2271	PTPN3	protein tyrosine phosphatase non-receptor type 3 [Source:HGNC Symbol;Acc:HGNC:9655]
14	57185623	57185891	269	WT_un_S5_peak_2616	44	4.19238	4.45165	1.28046	226	Distal Intergenic	57206794	57232372	25579	-	ENSG00000070367	ENST00000554011	46481	EXOC5	exocyst complex component 5 [Source:HGNC Symbol;Acc:HGNC:10696]
19	676239	676562	324	WT_un_S5_peak_3807	55	4.00814	5.54339	2.25953	164	Promoter (<=1kb)	676392	683385	6994	+	ENSG00000070404	ENST00000166139	0	FSTL3	follistatin like 3 [Source:HGNC Symbol;Acc:HGNC:3973]
17	2393525	2393836	312	WT_un_S5_peak_3233	54	3.50058	5.46828	2.18945	166	Promoter (<=1kb)	2387498	2393830	6333	-	ENSG00000070444	ENST00000571232	0	MNT	MAX network transcriptional repressor [Source:HGNC Symbol;Acc:HGNC:7188]
17	2399592	2400544	953	WT_un_S5_peak_3234a	73	5.22326	7.36442	3.92103	448	Promoter (<=1kb)	2395014	2400446	5433	-	ENSG00000070444	ENST00000574559	0	MNT	MAX network transcriptional repressor [Source:HGNC Symbol;Acc:HGNC:7188]
17	2399592	2400544	953	WT_un_S5_peak_3234b	50	3.755	5.08049	1.8432	823	Promoter (<=1kb)	2395014	2400446	5433	-	ENSG00000070444	ENST00000574559	0	MNT	MAX network transcriptional repressor [Source:HGNC Symbol;Acc:HGNC:7188]
17	76726334	76727313	980	WT_un_S5_peak_3612	51	4.0319	5.15375	1.91055	639	Promoter (<=1kb)	76712832	76726679	13848	-	ENSG00000070495	ENST00000445478	0	JMJD6	jumonji domain containing 6, arginine demethylase and lysine hydroxylase [Source:HGNC Symbol;Acc:HGNC:19355]
17	68456341	68456685	345	WT_un_S5_peak_3575	33	3.34471	3.30737	0.35013	136	Promoter (<=1kb)	68421514	68457479	35966	-	ENSG00000070540	ENST00000546360	794	WIPI1	WD repeat domain, phosphoinositide interacting 1 [Source:HGNC Symbol;Acc:HGNC:25471]
9	35737151	35737630	480	WT_un_S5_peak_8304	23	2.38633	2.34354	0	73	Promoter (1-2kb)	35736867	35738635	1769	-	ENSG00000070610	ENST00000378088	1005	GBA2	glucosylceramidase beta 2 [Source:HGNC Symbol;Acc:HGNC:18986]
7	97872309	97872577	269	WT_un_S5_peak_7600	24	2.72055	2.48373	0	125	Promoter (<=1kb)	97851677	97872408	20732	-	ENSG00000070669	ENST00000394308	0	ASNS	asparagine synthetase (glutamine-hydrolyzing) [Source:HGNC Symbol;Acc:HGNC:753]
8	100713294	100713752	459	WT_un_S5_peak_8058	36	3.31942	3.6957	0.65998	383	Promoter (<=1kb)	100702795	100713803	11009	-	ENSG00000070756	ENST00000678290	51	PABPC1	poly(A) binding protein cytoplasmic 1 [Source:HGNC Symbol;Acc:HGNC:8554]
8	100720549	100720835	287	WT_un_S5_peak_8059	35	3.26231	3.55932	0.55019	136	Promoter (<=1kb)	100702051	100721169	19119	-	ENSG00000070756	ENST00000677765	334	PABPC1	poly(A) binding protein cytoplasmic 1 [Source:HGNC Symbol;Acc:HGNC:8554]
8	100721648	100722519	872	WT_un_S5_peak_8060	862	20.78	86.2821	81.1426	420	Promoter (<=1kb)	100702795	100721904	19110	-	ENSG00000070756	ENST00000678954	0	PABPC1	poly(A) binding protein cytoplasmic 1 [Source:HGNC Symbol;Acc:HGNC:8554]
16	58129099	58129608	510	WT_un_S5_peak_3140	121	6.49233	12.1886	8.43326	225	Promoter (<=1kb)	58113592	58129381	15790	-	ENSG00000070761	ENST00000262498	0	CFAP20	cilia and flagella associated protein 20 [Source:HGNC Symbol;Acc:HGNC:29523]
1	22025269	22026019	751	WT_un_S5_peak_85	106	6.04371	10.6487	6.99224	441	Promoter (<=1kb)	22025511	22101360	75850	+	ENSG00000070831	ENST00000648594	0	CDC42	cell division cycle 42 [Source:HGNC Symbol;Acc:HGNC:1736]
1	22052559	22053026	468	WT_un_S5_peak_86	72	3.8954	7.28745	3.8473	229	Promoter (<=1kb)	22052627	22092923	40297	+	ENSG00000070831	ENST00000400259	0	CDC42	cell division cycle 42 [Source:HGNC Symbol;Acc:HGNC:1736]
7	25025793	25026061	269	WT_un_S5_peak_7476	35	3.46081	3.53919	0.53357	129	Distal Intergenic	24871983	24981634	109652	-	ENSG00000070882	ENST00000415952	-44159	OSBPL3	oxysterol binding protein like 3 [Source:HGNC Symbol;Acc:HGNC:16370]
3	8848859	8849485	627	WT_un_S5_peak_5329	35	2.98733	3.53412	0.53357	274	Intron (ENST00000427329/ENSG00000070950, intron 3 of 3)	8890109	8902398	12290	-	ENSG00000070950	ENST00000429790	52913	RAD18	RAD18 E3 ubiquitin protein ligase [Source:HGNC Symbol;Acc:HGNC:18278]
3	8851629	8852097	469	WT_un_S5_peak_5330	65	4.6961	6.55207	3.16577	272	Intron (ENST00000427329/ENSG00000070950, intron 3 of 3)	8890109	8902398	12290	-	ENSG00000070950	ENST00000429790	50301	RAD18	RAD18 E3 ubiquitin protein ligase [Source:HGNC Symbol;Acc:HGNC:18278]
3	8881961	8882246	286	WT_un_S5_peak_5331	26	2.72923	2.69119	0	276	Intron (ENST00000427329/ENSG00000070950, intron 3 of 3)	8890109	8902398	12290	-	ENSG00000070950	ENST00000429790	20152	RAD18	RAD18 E3 ubiquitin protein ligase [Source:HGNC Symbol;Acc:HGNC:18278]
3	8886403	8889154	2752	WT_un_S5_peak_5332a	67	4.80384	6.71822	3.31136	755	Intron (ENST00000427329/ENSG00000070950, intron 3 of 3)	8890109	8902398	12290	-	ENSG00000070950	ENST00000429790	13244	RAD18	RAD18 E3 ubiquitin protein ligase [Source:HGNC Symbol;Acc:HGNC:18278]
3	8886403	8889154	2752	WT_un_S5_peak_5332b	66	4.43933	6.6833	3.28307	1049	Intron (ENST00000427329/ENSG00000070950, intron 3 of 3)	8890109	8902398	12290	-	ENSG00000070950	ENST00000429790	13244	RAD18	RAD18 E3 ubiquitin protein ligase [Source:HGNC Symbol;Acc:HGNC:18278]
3	8886403	8889154	2752	WT_un_S5_peak_5332c	121	7.48446	12.1335	8.38243	1462	Intron (ENST00000427329/ENSG00000070950, intron 3 of 3)	8890109	8902398	12290	-	ENSG00000070950	ENST00000429790	13244	RAD18	RAD18 E3 ubiquitin protein ligase [Source:HGNC Symbol;Acc:HGNC:18278]
3	8886403	8889154	2752	WT_un_S5_peak_5332d	93	5.35178	9.31879	5.72445	1812	Intron (ENST00000427329/ENSG00000070950, intron 3 of 3)	8890109	8902398	12290	-	ENSG00000070950	ENST00000429790	13244	RAD18	RAD18 E3 ubiquitin protein ligase [Source:HGNC Symbol;Acc:HGNC:18278]
3	8886403	8889154	2752	WT_un_S5_peak_5332e	68	4.83308	6.82947	3.41799	2233	Intron (ENST00000427329/ENSG00000070950, intron 3 of 3)	8890109	8902398	12290	-	ENSG00000070950	ENST00000429790	13244	RAD18	RAD18 E3 ubiquitin protein ligase [Source:HGNC Symbol;Acc:HGNC:18278]
3	8886403	8889154	2752	WT_un_S5_peak_5332f	49	4.26383	4.98931	1.76911	2664	Intron (ENST00000427329/ENSG00000070950, intron 3 of 3)	8890109	8902398	12290	-	ENSG00000070950	ENST00000429790	13244	RAD18	RAD18 E3 ubiquitin protein ligase [Source:HGNC Symbol;Acc:HGNC:18278]
12	89707322	89708065	744	WT_un_S5_peak_2178	49	4.22019	4.92356	1.71247	515	Promoter (<=1kb)	89588049	89708838	120790	-	ENSG00000070961	ENST00000428670	773	ATP2B1	ATPase plasma membrane Ca2+ transporting 1 [Source:HGNC Symbol;Acc:HGNC:814]
12	89708613	89709203	591	WT_un_S5_peak_2179	99	4.80459	9.93997	6.31256	310	Promoter (<=1kb)	89588049	89708838	120790	-	ENSG00000070961	ENST00000428670	0	ATP2B1	ATPase plasma membrane Ca2+ transporting 1 [Source:HGNC Symbol;Acc:HGNC:814]
12	89709515	89710419	905	WT_un_S5_peak_2180	145	6.57651	14.5977	10.7491	318	Promoter (<=1kb)	89655583	89709300	53718	-	ENSG00000070961	ENST00000551310	-215	ATP2B1	ATPase plasma membrane Ca2+ transporting 1 [Source:HGNC Symbol;Acc:HGNC:814]
2	105753595	105754204	610	WT_un_S5_peak_4489	23	2.45954	2.30424	0	121	Intron (ENST00000233154/ENSG00000071051, intron 1 of 4)	105745731	105881534	135804	+	ENSG00000071051	ENST00000393348	7864	NCK2	NCK adaptor protein 2 [Source:HGNC Symbol;Acc:HGNC:7665]
2	101002041	101002648	608	WT_un_S5_peak_4477	225	7.45394	22.5515	18.4495	250	Promoter (<=1kb)	101002229	101004604	2376	+	ENSG00000071082	ENST00000409000	0	RPL31	ribosomal protein L31 [Source:HGNC Symbol;Acc:HGNC:10334]
4	10100093	10100361	269	WT_un_S5_peak_5976	26	3.09502	2.69119	0	64	Intron (ENST00000499869/ENSG00000071127, intron 3 of 14)	10087706	10096618	8913	-	ENSG00000071127	ENST00000505543	-3475	WDR1	WD repeat domain 1 [Source:HGNC Symbol;Acc:HGNC:12754]
4	10107067	10107665	599	WT_un_S5_peak_5977	44	3.82659	4.45165	1.28046	301	Promoter (<=1kb)	10097710	10106556	8847	-	ENSG00000071127	ENST00000264785	-511	WDR1	WD repeat domain 1 [Source:HGNC Symbol;Acc:HGNC:12754]
4	10108850	10109670	821	WT_un_S5_peak_5978	33	3.05288	3.30737	0.35013	382	Promoter (2-3kb)	10097710	10106556	8847	-	ENSG00000071127	ENST00000264785	-2294	WDR1	WD repeat domain 1 [Source:HGNC Symbol;Acc:HGNC:12754]
4	10110176	10111557	1382	WT_un_S5_peak_5979a	59	4.94817	5.94877	2.6174	286	Intron (ENST00000499869/ENSG00000071127, intron 2 of 14)	10097710	10106556	8847	-	ENSG00000071127	ENST00000264785	-3620	WDR1	WD repeat domain 1 [Source:HGNC Symbol;Acc:HGNC:12754]
4	10110176	10111557	1382	WT_un_S5_peak_5979b	76	5.4263	7.67804	4.19448	1177	Intron (ENST00000499869/ENSG00000071127, intron 2 of 14)	10097710	10106556	8847	-	ENSG00000071127	ENST00000264785	-3620	WDR1	WD repeat domain 1 [Source:HGNC Symbol;Acc:HGNC:12754]
4	10115183	10120024	4842	WT_un_S5_peak_5984a	55	4.32529	5.52196	2.24008	157	Promoter (<=1kb)	10074339	10116799	42461	-	ENSG00000071127	ENST00000499869	0	WDR1	WD repeat domain 1 [Source:HGNC Symbol;Acc:HGNC:12754]
4	10115183	10120024	4842	WT_un_S5_peak_5984b	33	2.92259	3.39624	0.43095	744	Promoter (<=1kb)	10074339	10116799	42461	-	ENSG00000071127	ENST00000499869	0	WDR1	WD repeat domain 1 [Source:HGNC Symbol;Acc:HGNC:12754]
4	10115183	10120024	4842	WT_un_S5_peak_5984c	33	3.1397	3.39624	0.43095	949	Promoter (<=1kb)	10074339	10116799	42461	-	ENSG00000071127	ENST00000499869	0	WDR1	WD repeat domain 1 [Source:HGNC Symbol;Acc:HGNC:12754]
4	10115183	10120024	4842	WT_un_S5_peak_5984d	79	4.00424	7.93004	4.43585	1455	Promoter (<=1kb)	10074339	10116799	42461	-	ENSG00000071127	ENST00000499869	0	WDR1	WD repeat domain 1 [Source:HGNC Symbol;Acc:HGNC:12754]
4	10115183	10120024	4842	WT_un_S5_peak_5984e	194	7.52011	19.494	15.4749	2050	Promoter (<=1kb)	10074339	10116799	42461	-	ENSG00000071127	ENST00000499869	0	WDR1	WD repeat domain 1 [Source:HGNC Symbol;Acc:HGNC:12754]
4	10115183	10120024	4842	WT_un_S5_peak_5984f	38	3.43265	3.81524	0.77032	2967	Promoter (<=1kb)	10074339	10116799	42461	-	ENSG00000071127	ENST00000499869	0	WDR1	WD repeat domain 1 [Source:HGNC Symbol;Acc:HGNC:12754]
4	10115183	10120024	4842	WT_un_S5_peak_5984g	54	3.50058	5.46828	2.18945	3305	Promoter (<=1kb)	10074339	10116799	42461	-	ENSG00000071127	ENST00000499869	0	WDR1	WD repeat domain 1 [Source:HGNC Symbol;Acc:HGNC:12754]
4	10115183	10120024	4842	WT_un_S5_peak_5984h	57	4.8296	5.78042	2.47816	4222	Promoter (<=1kb)	10074339	10116799	42461	-	ENSG00000071127	ENST00000499869	0	WDR1	WD repeat domain 1 [Source:HGNC Symbol;Acc:HGNC:12754]
4	10115183	10120024	4842	WT_un_S5_peak_5984i	56	4.43738	5.69186	2.39319	4702	Promoter (<=1kb)	10074339	10116799	42461	-	ENSG00000071127	ENST00000499869	0	WDR1	WD repeat domain 1 [Source:HGNC Symbol;Acc:HGNC:12754]
7	17939734	17940241	508	WT_un_S5_peak_7444	35	3.46081	3.53919	0.53357	385	Promoter (<=1kb)	17868282	17940431	72150	-	ENSG00000071189	ENST00000482558	190	SNX13	sorting nexin 13 [Source:HGNC Symbol;Acc:HGNC:21335]
7	17940448	17940837	390	WT_un_S5_peak_7445	44	4.19238	4.45165	1.28046	151	Promoter (<=1kb)	17790761	17940494	149734	-	ENSG00000071189	ENST00000428135	0	SNX13	sorting nexin 13 [Source:HGNC Symbol;Acc:HGNC:21335]
3	8501301	8502113	813	WT_un_S5_peak_5323	88	6.16547	8.84984	5.28456	495	Promoter (<=1kb)	8501807	8550449	48643	+	ENSG00000071282	ENST00000426878	0	LMCD1	LIM and cysteine rich domains 1 [Source:HGNC Symbol;Acc:HGNC:6633]
3	8502614	8503442	829	WT_un_S5_peak_5324	58	4.55544	5.87154	2.5571	354	Promoter (<=1kb)	8501888	8567764	65877	+	ENSG00000071282	ENST00000456506	726	LMCD1	LIM and cysteine rich domains 1 [Source:HGNC Symbol;Acc:HGNC:6633]
3	8503712	8504109	398	WT_un_S5_peak_5325	47	4.10774	4.76379	1.57115	174	Promoter (1-2kb)	8501888	8567764	65877	+	ENSG00000071282	ENST00000456506	1824	LMCD1	LIM and cysteine rich domains 1 [Source:HGNC Symbol;Acc:HGNC:6633]
3	8525948	8526216	269	WT_un_S5_peak_5326	24	2.89517	2.43654	0	208	Intron (ENST00000426878/ENSG00000071282, intron 1 of 4)	8501888	8567764	65877	+	ENSG00000071282	ENST00000456506	24060	LMCD1	LIM and cysteine rich domains 1 [Source:HGNC Symbol;Acc:HGNC:6633]
3	8530193	8530461	269	WT_un_S5_peak_5327	32	3.24496	3.23664	0.29553	207	Intron (ENST00000426878/ENSG00000071282, intron 1 of 4)	8501888	8567764	65877	+	ENSG00000071282	ENST00000456506	28305	LMCD1	LIM and cysteine rich domains 1 [Source:HGNC Symbol;Acc:HGNC:6633]
2	12717269	12717542	274	WT_un_S5_peak_4263	23	2.45954	2.30424	0	80	Promoter (<=1kb)	12716936	12742734	25799	+	ENSG00000071575	ENST00000155926	333	TRIB2	tribbles pseudokinase 2 [Source:HGNC Symbol;Acc:HGNC:30809]
8	144409090	144409358	269	WT_un_S5_peak_8197	25	2.5304	2.55201	0	92	Promoter (<=1kb)	144393231	144409335	16105	-	ENSG00000071894	ENST00000616140	0	CPSF1	cleavage and polyadenylation specific factor 1 [Source:HGNC Symbol;Acc:HGNC:2324]
2	171522192	171522488	297	WT_un_S5_peak_4604	38	3.7781	3.88541	0.82322	241	Promoter (<=1kb)	171522247	171555607	33361	+	ENSG00000071967	ENST00000409484	0	CYBRD1	cytochrome b reductase 1 [Source:HGNC Symbol;Acc:HGNC:20797]
6	170584316	170584685	370	WT_un_S5_peak_7400	40	3.63653	4.09083	0.99096	217	Promoter (<=1kb)	170575295	170584637	9343	-	ENSG00000071994	ENST00000541970	0	PDCD2	programmed cell death 2 [Source:HGNC Symbol;Acc:HGNC:8762]
14	67694786	67695224	439	WT_un_S5_peak_2645	24	2.89517	2.43654	0	137	Promoter (<=1kb)	67684510	67695717	11208	-	ENSG00000072042	ENST00000553816	493	RDH11	retinol dehydrogenase 11 [Source:HGNC Symbol;Acc:HGNC:17964]
14	68962658	68963068	411	WT_un_S5_peak_2651	32	3.23733	3.22608	0.28631	312	Promoter (<=1kb)	68893683	68962342	68660	-	ENSG00000072110	ENST00000554508	-316	ACTN1	actinin alpha 1 [Source:HGNC Symbol;Acc:HGNC:163]
14	68963429	68963810	382	WT_un_S5_peak_2652	26	2.72923	2.69119	0	16	Promoter (1-2kb)	68893683	68962342	68660	-	ENSG00000072110	ENST00000554508	-1087	ACTN1	actinin alpha 1 [Source:HGNC Symbol;Acc:HGNC:163]
14	68968816	68969224	409	WT_un_S5_peak_2653	56	4.43738	5.69186	2.39319	152	Promoter (2-3kb)	68874133	68971794	97662	-	ENSG00000072110	ENST00000683225	2570	ACTN1	actinin alpha 1 [Source:HGNC Symbol;Acc:HGNC:163]
14	68971091	68971669	579	WT_un_S5_peak_2654	36	3.07067	3.62443	0.59626	299	Promoter (<=1kb)	68874133	68971794	97662	-	ENSG00000072110	ENST00000683225	125	ACTN1	actinin alpha 1 [Source:HGNC Symbol;Acc:HGNC:163]
14	68972830	68973273	444	WT_un_S5_peak_2655	29	2.64517	2.95763	0.06978	283	Promoter (1-2kb)	68874133	68971794	97662	-	ENSG00000072110	ENST00000683225	-1036	ACTN1	actinin alpha 1 [Source:HGNC Symbol;Acc:HGNC:163]
14	68973637	68974346	710	WT_un_S5_peak_2656	37	3.68266	3.75718	0.7173	586	Promoter (1-2kb)	68874133	68971794	97662	-	ENSG00000072110	ENST00000683225	-1843	ACTN1	actinin alpha 1 [Source:HGNC Symbol;Acc:HGNC:163]
14	68974664	68975170	507	WT_un_S5_peak_2657	29	2.84256	2.9599	0.06978	345	Promoter (2-3kb)	68874783	68977566	102784	-	ENSG00000072110	ENST00000376839	2396	ACTN1	actinin alpha 1 [Source:HGNC Symbol;Acc:HGNC:163]
14	68975790	68980254	4465	WT_un_S5_peak_2658a	52	4.47697	5.28347	2.03301	144	Promoter (<=1kb)	68874128	68979302	105175	-	ENSG00000072110	ENST00000394419	0	ACTN1	actinin alpha 1 [Source:HGNC Symbol;Acc:HGNC:163]
14	68975790	68980254	4465	WT_un_S5_peak_2658b	144	8.39307	14.4509	10.6062	1085	Promoter (<=1kb)	68874128	68979302	105175	-	ENSG00000072110	ENST00000394419	0	ACTN1	actinin alpha 1 [Source:HGNC Symbol;Acc:HGNC:163]
14	68975790	68980254	4465	WT_un_S5_peak_2658c	508	19.3952	50.8566	46.2145	2310	Promoter (<=1kb)	68874128	68979302	105175	-	ENSG00000072110	ENST00000394419	0	ACTN1	actinin alpha 1 [Source:HGNC Symbol;Acc:HGNC:163]
14	68975790	68980254	4465	WT_un_S5_peak_2658d	375	15.6014	37.5046	33.0915	3394	Promoter (<=1kb)	68874128	68979302	105175	-	ENSG00000072110	ENST00000394419	0	ACTN1	actinin alpha 1 [Source:HGNC Symbol;Acc:HGNC:163]
17	19648063	19648748	686	WT_un_S5_peak_3316	91	5.09286	9.17333	5.59267	441	Promoter (<=1kb)	19648136	19677130	28995	+	ENSG00000072210	ENST00000581518	0	ALDH3A2	aldehyde dehydrogenase 3 family member A2 [Source:HGNC Symbol;Acc:HGNC:403]
3	196081848	196082319	472	WT_un_S5_peak_5936	153	8.22866	15.3067	11.4207	210	Promoter (<=1kb)	196049284	196082090	32807	-	ENSG00000072274	ENST00000360110	0	TFRC	transferrin receptor [Source:HGNC Symbol;Acc:HGNC:11763]
17	17836000	17837334	1335	WT_un_S5_peak_3301a	236	8.72249	23.6981	19.5633	477	Promoter (<=1kb)	17811334	17836986	25653	-	ENSG00000072310	ENST00000261646	0	SREBF1	sterol regulatory element binding transcription factor 1 [Source:HGNC Symbol;Acc:HGNC:11289]
17	17836000	17837334	1335	WT_un_S5_peak_3301b	88	3.76005	8.87152	5.30318	1011	Promoter (<=1kb)	17811334	17836986	25653	-	ENSG00000072310	ENST00000261646	0	SREBF1	sterol regulatory element binding transcription factor 1 [Source:HGNC Symbol;Acc:HGNC:11289]
17	17837634	17837902	269	WT_un_S5_peak_3302	35	2.98733	3.53412	0.53357	144	Promoter (<=1kb)	17811356	17837002	25647	-	ENSG00000072310	ENST00000395757	-632	SREBF1	sterol regulatory element binding transcription factor 1 [Source:HGNC Symbol;Acc:HGNC:11289]
17	17838135	17838464	330	WT_un_S5_peak_3303	45	3.66589	4.59921	1.42082	125	Promoter (1-2kb)	17811356	17837002	25647	-	ENSG00000072310	ENST00000395757	-1133	SREBF1	sterol regulatory element binding transcription factor 1 [Source:HGNC Symbol;Acc:HGNC:11289]
17	17839688	17840482	795	WT_un_S5_peak_3304	53	3.21107	5.31046	2.05735	574	Promoter (2-3kb)	17811356	17837002	25647	-	ENSG00000072310	ENST00000395757	-2686	SREBF1	sterol regulatory element binding transcription factor 1 [Source:HGNC Symbol;Acc:HGNC:11289]
5	132963291	132963871	581	WT_un_S5_peak_6649	100	5.04033	10.0802	6.44639	315	Promoter (<=1kb)	132875395	132963634	88240	-	ENSG00000072364	ENST00000265343	0	AFF4	AF4/FMR2 family member 4 [Source:HGNC Symbol;Acc:HGNC:17869]
10	58334870	58335223	354	WT_un_S5_peak_1025	29	2.64517	2.95763	0.06978	172	Promoter (<=1kb)	58334979	58370751	35773	+	ENSG00000072401	ENST00000615793	0	UBE2D1	ubiquitin conjugating enzyme E2 D1 [Source:HGNC Symbol;Acc:HGNC:12474]
14	67240793	67242095	1303	WT_un_S5_peak_2642	84	5.12367	8.41215	4.886	262	Promoter (<=1kb)	67241342	67335798	94457	+	ENSG00000072415	ENST00000676464	0	MPP5	membrane palmitoylated protein 5 [Source:HGNC Symbol;Acc:HGNC:18669]
10	60942856	60945088	2233	WT_un_S5_peak_1030a	59	4.606	5.94877	2.6174	329	Promoter (<=1kb)	60869438	60944185	74748	-	ENSG00000072422	ENST00000337910	0	RHOBTB1	Rho related BTB domain containing 1 [Source:HGNC Symbol;Acc:HGNC:18738]
10	60942856	60945088	2233	WT_un_S5_peak_1030b	213	11.5081	21.3302	17.2569	795	Promoter (<=1kb)	60869438	60944185	74748	-	ENSG00000072422	ENST00000337910	0	RHOBTB1	Rho related BTB domain containing 1 [Source:HGNC Symbol;Acc:HGNC:18738]
10	60942856	60945088	2233	WT_un_S5_peak_1030c	126	5.89575	12.6839	8.91117	1281	Promoter (<=1kb)	60869438	60944185	74748	-	ENSG00000072422	ENST00000337910	0	RHOBTB1	Rho related BTB domain containing 1 [Source:HGNC Symbol;Acc:HGNC:18738]
10	60942856	60945088	2233	WT_un_S5_peak_1030d	58	4.51201	5.8007	2.49471	1663	Promoter (<=1kb)	60869438	60944185	74748	-	ENSG00000072422	ENST00000337910	0	RHOBTB1	Rho related BTB domain containing 1 [Source:HGNC Symbol;Acc:HGNC:18738]
X	53421905	53423279	1375	WT_un_S5_peak_8627a	112	6.03611	11.2084	7.51079	280	Promoter (<=1kb)	53374149	53422173	48025	-	ENSG00000072501	ENST00000675504	0	SMC1A	structural maintenance of chromosomes 1A [Source:HGNC Symbol;Acc:HGNC:11111]
X	53421905	53423279	1375	WT_un_S5_peak_8627b	187	10.4228	18.7993	14.7923	718	Promoter (<=1kb)	53374149	53422173	48025	-	ENSG00000072501	ENST00000675504	0	SMC1A	structural maintenance of chromosomes 1A [Source:HGNC Symbol;Acc:HGNC:11111]
5	163460415	163460846	432	WT_un_S5_peak_6772	69	4.61949	6.97694	3.55098	232	Promoter (<=1kb)	163460632	163491941	31310	+	ENSG00000072571	ENST00000393915	0	HMMR	hyaluronan mediated motility receptor [Source:HGNC Symbol;Acc:HGNC:5012]
5	163461116	163461619	504	WT_un_S5_peak_6773	33	3.34471	3.30737	0.35013	140	Promoter (<=1kb)	163460660	163469910	9251	+	ENSG00000072571	ENST00000517936	456	HMMR	hyaluronan mediated motility receptor [Source:HGNC Symbol;Acc:HGNC:5012]
3	3126712	3127374	663	WT_un_S5_peak_5295	79	5.97467	7.99793	4.48953	368	Promoter (<=1kb)	3126933	3148942	22010	+	ENSG00000072756	ENST00000651591	0	TRNT1	tRNA nucleotidyl transferase 1 [Source:HGNC Symbol;Acc:HGNC:17341]
17	7219586	7220517	932	WT_un_S5_peak_3254	59	4.606	5.94877	2.6174	477	Promoter (<=1kb)	7219844	7225265	5422	+	ENSG00000072778	ENST00000322910	0	ACADVL	acyl-CoA dehydrogenase very long chain [Source:HGNC Symbol;Acc:HGNC:92]
17	7220705	7220973	269	WT_un_S5_peak_3255	23	2.52497	2.39668	0	72	Promoter (<=1kb)	7220758	7222092	1335	+	ENSG00000072778	ENST00000580365	0	ACADVL	acyl-CoA dehydrogenase very long chain [Source:HGNC Symbol;Acc:HGNC:92]
17	7221390	7221854	465	WT_un_S5_peak_3256	40	3.63653	4.09083	0.99096	215	Promoter (<=1kb)	7221946	7223237	1292	+	ENSG00000072778	ENST00000582379	-92	ACADVL	acyl-CoA dehydrogenase very long chain [Source:HGNC Symbol;Acc:HGNC:92]
17	7222341	7222720	380	WT_un_S5_peak_3257	23	2.61444	2.34354	0	233	Promoter (<=1kb)	7222640	7223847	1208	+	ENSG00000072778	ENST00000578824	0	ACADVL	acyl-CoA dehydrogenase very long chain [Source:HGNC Symbol;Acc:HGNC:92]
5	171837863	171838313	451	WT_un_S5_peak_6792	23	2.52497	2.39668	0	87	Distal Intergenic	171867778	171868662	885	-	ENSG00000072803	ENST00000518106	30349	FBXW11	F-box and WD repeat domain containing 11 [Source:HGNC Symbol;Acc:HGNC:13607]
5	172006630	172007114	485	WT_un_S5_peak_6793	50	3.755	5.08049	1.8432	237	Promoter (<=1kb)	171861549	172006638	145090	-	ENSG00000072803	ENST00000517395	0	FBXW11	F-box and WD repeat domain containing 11 [Source:HGNC Symbol;Acc:HGNC:13607]
17	5486116	5486958	843	WT_un_S5_peak_3247	175	9.66554	17.5995	13.63	530	Promoter (<=1kb)	5471254	5486178	14925	-	ENSG00000072849	ENST00000158771	0	DERL2	derlin 2 [Source:HGNC Symbol;Acc:HGNC:17943]
19	16197676	16197955	280	WT_un_S5_peak_3931	23	2.61444	2.34354	0	128	Promoter (<=1kb)	16197854	16209041	11188	+	ENSG00000072958	ENST00000590263	0	AP1M1	adaptor related protein complex 1 subunit mu 1 [Source:HGNC Symbol;Acc:HGNC:13667]
19	44643646	44644328	683	WT_un_S5_peak_4098	100	6.1327	10.0589	6.42837	449	Promoter (<=1kb)	44643798	44663583	19786	+	ENSG00000073008	ENST00000344956	0	PVR	PVR cell adhesion molecule [Source:HGNC Symbol;Acc:HGNC:9705]
3	127598319	127598673	355	WT_un_S5_peak_5696	40	3.92167	4.07966	0.98433	186	Promoter (<=1kb)	127598410	127621829	23420	+	ENSG00000073111	ENST00000474964	0	MCM2	minichromosome maintenance complex component 2 [Source:HGNC Symbol;Acc:HGNC:6944]
17	35133220	35133518	299	WT_un_S5_peak_3345	24	2.553	2.43654	0	124	Exon (ENST00000442241/ENSG00000073536, exon 11 of 13)	35132244	35137167	4924	-	ENSG00000073536	ENST00000588019	3649	NLE1	notchless homolog 1 [Source:HGNC Symbol;Acc:HGNC:19889]
3	185656650	185656928	279	WT_un_S5_peak_5888	40	3.63653	4.09083	0.99096	122	Intron (ENST00000382199/ENSG00000073792, intron 12 of 15)	185646880	185649523	2644	-	ENSG00000073792	ENST00000464166	-7127	IGF2BP2	insulin like growth factor 2 mRNA binding protein 2 [Source:HGNC Symbol;Acc:HGNC:28867]
3	185813975	185814362	388	WT_un_S5_peak_5889	24	2.89517	2.43654	0	210	Exon (ENST00000466214/ENSG00000073792, exon 2 of 2)	185814055	185821103	7049	-	ENSG00000073792	ENST00000466214	6741	IGF2BP2	insulin like growth factor 2 mRNA binding protein 2 [Source:HGNC Symbol;Acc:HGNC:28867]
3	185825074	185825348	275	WT_un_S5_peak_5890	36	3.07067	3.62443	0.59626	207	Promoter (<=1kb)	185643130	185825042	181913	-	ENSG00000073792	ENST00000382199	-32	IGF2BP2	insulin like growth factor 2 mRNA binding protein 2 [Source:HGNC Symbol;Acc:HGNC:28867]
3	185282765	185283130	366	WT_un_S5_peak_5885	40	3.5795	4.07966	0.98433	189	Promoter (<=1kb)	185282941	185293079	10139	+	ENSG00000073803	ENST00000448876	0	MAP3K13	mitogen-activated protein kinase kinase kinase 13 [Source:HGNC Symbol;Acc:HGNC:6852]
11	86067572	86067840	269	WT_un_S5_peak_1667	23	2.38633	2.34354	0	224	Promoter (<=1kb)	85958987	86068780	109794	-	ENSG00000073921	ENST00000356360	940	PICALM	phosphatidylinositol binding clathrin assembly protein [Source:HGNC Symbol;Acc:HGNC:15514]
11	86068749	86070154	1406	WT_un_S5_peak_1668a	75	4.66745	7.53305	4.06575	146	Promoter (<=1kb)	85957175	86069084	111910	-	ENSG00000073921	ENST00000393346	0	PICALM	phosphatidylinositol binding clathrin assembly protein [Source:HGNC Symbol;Acc:HGNC:15514]
11	86068749	86070154	1406	WT_un_S5_peak_1668b	84	4.52708	8.44714	4.91684	840	Promoter (<=1kb)	85957175	86069084	111910	-	ENSG00000073921	ENST00000393346	0	PICALM	phosphatidylinositol binding clathrin assembly protein [Source:HGNC Symbol;Acc:HGNC:15514]
2	121530475	121531531	1057	WT_un_S5_peak_4537	1156	29.8443	115.674	110.223	480	Promoter (<=1kb)	121515665	121530745	15081	-	ENSG00000074054	ENST00000485112	0	CLASP1	cytoplasmic linker associated protein 1 [Source:HGNC Symbol;Acc:HGNC:17088]
11	77637540	77638026	487	WT_un_S5_peak_1632	77	4.76789	7.7029	4.21897	236	Promoter (<=1kb)	77614530	77637794	23265	-	ENSG00000074201	ENST00000525428	0	CLNS1A	chloride nucleotide-sensitive channel 1A [Source:HGNC Symbol;Acc:HGNC:2080]
11	86244295	86245117	823	WT_un_S5_peak_1670a	44	3.86545	4.42632	1.28046	115	Promoter (<=1kb)	86244753	86278707	33955	+	ENSG00000074266	ENST00000528180	0	EED	embryonic ectoderm development [Source:HGNC Symbol;Acc:HGNC:3188]
11	86244295	86245117	823	WT_un_S5_peak_1670b	64	3.36022	6.46191	3.0811	630	Promoter (<=1kb)	86244753	86278707	33955	+	ENSG00000074266	ENST00000528180	0	EED	embryonic ectoderm development [Source:HGNC Symbol;Acc:HGNC:3188]
11	86264388	86264656	269	WT_un_S5_peak_1671	24	2.90199	2.44511	0	197	Promoter (<=1kb)	86263945	86278554	14610	+	ENSG00000074266	ENST00000534564	443	EED	embryonic ectoderm development [Source:HGNC Symbol;Acc:HGNC:3188]
11	86265043	86265404	362	WT_un_S5_peak_1672	40	3.5795	4.07966	0.98433	218	Promoter (1-2kb)	86263945	86278554	14610	+	ENSG00000074266	ENST00000534564	1098	EED	embryonic ectoderm development [Source:HGNC Symbol;Acc:HGNC:3188]
11	18526491	18527313	823	WT_un_S5_peak_1350	127	6.6704	12.7154	8.942	495	Promoter (<=1kb)	18468336	18526951	58616	-	ENSG00000074319	ENST00000536719	0	TSG101	tumor susceptibility 101 [Source:HGNC Symbol;Acc:HGNC:15971]
3	127736228	127736728	501	WT_un_S5_peak_5697	142	7.17667	14.2141	10.3752	256	Promoter (<=1kb)	127692117	127736357	44241	-	ENSG00000074416	ENST00000398101	0	MGLL	monoglyceride lipase [Source:HGNC Symbol;Acc:HGNC:17038]
12	106080425	106080793	369	WT_un_S5_peak_2220	35	3.46081	3.53919	0.53357	214	Intron (ENST00000261402/ENSG00000074590, intron 4 of 6)	106067579	106084033	16455	-	ENSG00000074590	ENST00000553094	3240	NUAK1	NUAK family kinase 1 [Source:HGNC Symbol;Acc:HGNC:14311]
12	106083902	106084506	605	WT_un_S5_peak_2221	35	3.46081	3.53919	0.53357	138	Promoter (<=1kb)	106067579	106084033	16455	-	ENSG00000074590	ENST00000553094	0	NUAK1	NUAK family kinase 1 [Source:HGNC Symbol;Acc:HGNC:14311]
15	65517167	65517689	523	WT_un_S5_peak_2908	34	3.16673	3.43513	0.46547	306	Promoter (<=1kb)	65442463	65517273	74811	-	ENSG00000074603	ENST00000341861	0	DPP8	dipeptidyl peptidase 8 [Source:HGNC Symbol;Acc:HGNC:16490]
1	8868294	8869922	1629	WT_un_S5_peak_42a	43	3.52689	4.33257	1.20064	142	Promoter (1-2kb)	8861002	8871576	10575	-	ENSG00000074800	ENST00000464920	1654	ENO1	enolase 1 [Source:HGNC Symbol;Acc:HGNC:3350]
1	8868294	8869922	1629	WT_un_S5_peak_42b	42	3.48821	4.26024	1.14417	418	Promoter (1-2kb)	8861002	8871576	10575	-	ENSG00000074800	ENST00000464920	1654	ENO1	enolase 1 [Source:HGNC Symbol;Acc:HGNC:3350]
1	8868294	8869922	1629	WT_un_S5_peak_42c	59	4.30949	5.95321	2.61777	883	Promoter (1-2kb)	8861002	8871576	10575	-	ENSG00000074800	ENST00000464920	1654	ENO1	enolase 1 [Source:HGNC Symbol;Acc:HGNC:3350]
1	8868294	8869922	1629	WT_un_S5_peak_42d	65	4.09305	6.54042	3.15549	1406	Promoter (1-2kb)	8861002	8871576	10575	-	ENSG00000074800	ENST00000464920	1654	ENO1	enolase 1 [Source:HGNC Symbol;Acc:HGNC:3350]
1	8870306	8870575	270	WT_un_S5_peak_43	45	3.67539	4.54278	1.36717	102	Promoter (1-2kb)	8861002	8871576	10575	-	ENSG00000074800	ENST00000464920	1001	ENO1	enolase 1 [Source:HGNC Symbol;Acc:HGNC:3350]
1	8871810	8872349	540	WT_un_S5_peak_44	43	3.52689	4.33257	1.20064	185	Promoter (<=1kb)	8866009	8871944	5936	-	ENSG00000074800	ENST00000645600	0	ENO1	enolase 1 [Source:HGNC Symbol;Acc:HGNC:3350]
1	8873526	8873941	416	WT_un_S5_peak_45	40	3.31916	4.00397	0.93477	129	Promoter (1-2kb)	8866009	8871944	5936	-	ENSG00000074800	ENST00000645600	-1582	ENO1	enolase 1 [Source:HGNC Symbol;Acc:HGNC:3350]
1	8878018	8879518	1501	WT_un_S5_peak_46	276	11.3719	27.6059	23.3865	644	Promoter (<=1kb)	8861000	8878686	17687	-	ENSG00000074800	ENST00000234590	0	ENO1	enolase 1 [Source:HGNC Symbol;Acc:HGNC:3350]
6	112087158	112087594	437	WT_un_S5_peak_7268	59	4.606	5.94877	2.6174	232	Promoter (<=1kb)	112070663	112087482	16820	-	ENSG00000074935	ENST00000368662	0	TUBE1	tubulin epsilon 1 [Source:HGNC Symbol;Acc:HGNC:20775]
1	17652404	17652759	356	WT_un_S5_peak_72	24	2.94165	2.49512	0	102	Intron (ENST00000361221/ENSG00000074964, intron 22 of 28)	17639753	17654665	14913	+	ENSG00000074964	ENST00000466782	12651	ARHGEF10L	Rho guanine nucleotide exchange factor 10 like [Source:HGNC Symbol;Acc:HGNC:25540]
15	66356250	66356766	517	WT_un_S5_peak_2912	78	4.85686	7.85256	4.36153	322	Promoter (<=1kb)	66336191	66356685	20495	-	ENSG00000075131	ENST00000261881	0	TIPIN	TIMELESS interacting protein [Source:HGNC Symbol;Acc:HGNC:30750]
12	102119784	102120266	483	WT_un_S5_peak_2206	86	6.3871	8.60744	5.05654	251	Promoter (<=1kb)	102073103	102120114	47012	-	ENSG00000075188	ENST00000552283	0	NUP37	nucleoporin 37 [Source:HGNC Symbol;Acc:HGNC:29929]
1	178092809	178094658	1850	WT_un_S5_peak_687a	59	4.94817	5.94877	2.6174	765	Promoter (<=1kb)	178094104	178478850	384747	+	ENSG00000075391	ENST00000367649	0	RASAL2	RAS protein activator like 2 [Source:HGNC Symbol;Acc:HGNC:9874]
1	178092809	178094658	1850	WT_un_S5_peak_687b	41	3.15842	4.14638	1.04025	1445	Promoter (<=1kb)	178094104	178478850	384747	+	ENSG00000075391	ENST00000367649	0	RASAL2	RAS protein activator like 2 [Source:HGNC Symbol;Acc:HGNC:9874]
12	98593497	98594204	708	WT_un_S5_peak_2201	73	5.22326	7.36442	3.92103	206	Promoter (<=1kb)	98593591	98606379	12789	+	ENSG00000075415	ENST00000401722	0	SLC25A3	solute carrier family 25 member 3 [Source:HGNC Symbol;Acc:HGNC:10989]
3	172039433	172040277	845	WT_un_S5_peak_5865	152	7.40478	15.2574	11.372	227	Promoter (<=1kb)	172039578	172401669	362092	+	ENSG00000075420	ENST00000415807	0	FNDC3B	fibronectin type III domain containing 3B [Source:HGNC Symbol;Acc:HGNC:24670]
3	172140532	172141092	561	WT_un_S5_peak_5866	36	3.63673	3.6957	0.65998	192	Intron (ENST00000415807/ENSG00000075420, intron 3 of 25)	172148535	172187218	38684	+	ENSG00000075420	ENST00000476794	-7443	FNDC3B	fibronectin type III domain containing 3B [Source:HGNC Symbol;Acc:HGNC:24670]
3	172174766	172175251	486	WT_un_S5_peak_5867	36	3.31942	3.6957	0.65998	400	Intron (ENST00000415807/ENSG00000075420, intron 3 of 25)	172148535	172187218	38684	+	ENSG00000075420	ENST00000476794	26231	FNDC3B	fibronectin type III domain containing 3B [Source:HGNC Symbol;Acc:HGNC:24670]
2	28390233	28390666	434	WT_un_S5_peak_4299	71	4.44237	7.14869	3.7138	286	Promoter (1-2kb)	28392448	28408802	16355	+	ENSG00000075426	ENST00000460736	-1782	FOSL2	FOS like 2, AP-1 transcription factor subunit [Source:HGNC Symbol;Acc:HGNC:3798]
2	28391671	28394435	2765	WT_un_S5_peak_4300a	116	6.17925	11.6465	7.92805	730	Promoter (<=1kb)	28392448	28408802	16355	+	ENSG00000075426	ENST00000460736	0	FOSL2	FOS like 2, AP-1 transcription factor subunit [Source:HGNC Symbol;Acc:HGNC:3798]
2	28391671	28394435	2765	WT_un_S5_peak_4300b	186	8.09383	18.6814	14.683	1348	Promoter (<=1kb)	28392448	28408802	16355	+	ENSG00000075426	ENST00000460736	0	FOSL2	FOS like 2, AP-1 transcription factor subunit [Source:HGNC Symbol;Acc:HGNC:3798]
2	28391671	28394435	2765	WT_un_S5_peak_4300c	55	4.00814	5.54339	2.25953	2059	Promoter (<=1kb)	28392448	28408802	16355	+	ENSG00000075426	ENST00000460736	0	FOSL2	FOS like 2, AP-1 transcription factor subunit [Source:HGNC Symbol;Acc:HGNC:3798]
2	28395713	28396315	603	WT_un_S5_peak_4302	42	3.76614	4.27515	1.1584	442	Promoter (<=1kb)	28395511	28412192	16682	+	ENSG00000075426	ENST00000436647	202	FOSL2	FOS like 2, AP-1 transcription factor subunit [Source:HGNC Symbol;Acc:HGNC:3798]
4	48698402	48698972	571	WT_un_S5_peak_6039	44	3.82659	4.45165	1.28046	324	Intron (ENST00000358350/ENSG00000075539, intron 2 of 63)	48620657	48681171	60515	-	ENSG00000075539	ENST00000505759	-17231	FRYL	FRY like transcription coactivator [Source:HGNC Symbol;Acc:HGNC:29127]
7	5592618	5593084	467	WT_un_S5_peak_7418	275	10.8933	27.551	23.3325	221	Promoter (<=1kb)	5592816	5606655	13840	+	ENSG00000075618	ENST00000382361	0	FSCN1	fascin actin-bundling protein 1 [Source:HGNC Symbol;Acc:HGNC:11148]
7	5516908	5531032	14125	WT_un_S5_peak_7417a	88	5.0937	8.87145	5.30318	244	Promoter (<=1kb)	5526409	5530601	4193	-	ENSG00000075624	ENST00000674681	0	ACTB	actin beta [Source:HGNC Symbol;Acc:HGNC:132]
7	5516908	5531032	14125	WT_un_S5_peak_7417b	111	5.41596	11.1909	7.50151	1199	Promoter (<=1kb)	5526409	5530601	4193	-	ENSG00000075624	ENST00000674681	0	ACTB	actin beta [Source:HGNC Symbol;Acc:HGNC:132]
7	5516908	5531032	14125	WT_un_S5_peak_7417c	164	6.92225	16.4086	12.4807	1711	Promoter (<=1kb)	5526409	5530601	4193	-	ENSG00000075624	ENST00000674681	0	ACTB	actin beta [Source:HGNC Symbol;Acc:HGNC:132]
7	5516908	5531032	14125	WT_un_S5_peak_7417d	164	6.92225	16.4086	12.4807	2046	Promoter (<=1kb)	5526409	5530601	4193	-	ENSG00000075624	ENST00000674681	0	ACTB	actin beta [Source:HGNC Symbol;Acc:HGNC:132]
7	5516908	5531032	14125	WT_un_S5_peak_7417e	195	8.72256	19.523	15.5038	2616	Promoter (<=1kb)	5526409	5530601	4193	-	ENSG00000075624	ENST00000674681	0	ACTB	actin beta [Source:HGNC Symbol;Acc:HGNC:132]
7	5516908	5531032	14125	WT_un_S5_peak_7417f	236	9.82065	23.6491	19.5152	3066	Promoter (<=1kb)	5526409	5530601	4193	-	ENSG00000075624	ENST00000674681	0	ACTB	actin beta [Source:HGNC Symbol;Acc:HGNC:132]
7	5516908	5531032	14125	WT_un_S5_peak_7417g	216	9.31985	21.6445	17.5613	3909	Promoter (<=1kb)	5526409	5530601	4193	-	ENSG00000075624	ENST00000674681	0	ACTB	actin beta [Source:HGNC Symbol;Acc:HGNC:132]
7	5516908	5531032	14125	WT_un_S5_peak_7417h	175	8.58032	17.5578	13.5913	4993	Promoter (<=1kb)	5526409	5530601	4193	-	ENSG00000075624	ENST00000674681	0	ACTB	actin beta [Source:HGNC Symbol;Acc:HGNC:132]
7	5516908	5531032	14125	WT_un_S5_peak_7417i	74	4.17894	7.45127	4.00637	5562	Promoter (<=1kb)	5526409	5530601	4193	-	ENSG00000075624	ENST00000674681	0	ACTB	actin beta [Source:HGNC Symbol;Acc:HGNC:132]
7	5516908	5531032	14125	WT_un_S5_peak_7417j	64	3.36022	6.46191	3.0811	5979	Promoter (<=1kb)	5526409	5530601	4193	-	ENSG00000075624	ENST00000674681	0	ACTB	actin beta [Source:HGNC Symbol;Acc:HGNC:132]
7	5516908	5531032	14125	WT_un_S5_peak_7417k	221	9.21881	22.1965	18.102	6323	Promoter (<=1kb)	5526409	5530601	4193	-	ENSG00000075624	ENST00000674681	0	ACTB	actin beta [Source:HGNC Symbol;Acc:HGNC:132]
7	5516908	5531032	14125	WT_un_S5_peak_7417l	262	11.9623	26.2139	22.0195	7342	Promoter (<=1kb)	5526409	5530601	4193	-	ENSG00000075624	ENST00000674681	0	ACTB	actin beta [Source:HGNC Symbol;Acc:HGNC:132]
7	5516908	5531032	14125	WT_un_S5_peak_7417m	164	6.92225	16.4086	12.4807	7779	Promoter (<=1kb)	5526409	5530601	4193	-	ENSG00000075624	ENST00000674681	0	ACTB	actin beta [Source:HGNC Symbol;Acc:HGNC:132]
7	5516908	5531032	14125	WT_un_S5_peak_7417n	188	8.35036	18.8504	14.8419	8326	Promoter (<=1kb)	5526409	5530601	4193	-	ENSG00000075624	ENST00000674681	0	ACTB	actin beta [Source:HGNC Symbol;Acc:HGNC:132]
7	5516908	5531032	14125	WT_un_S5_peak_7417o	255	11.378	25.5943	21.4114	8997	Promoter (<=1kb)	5526409	5530601	4193	-	ENSG00000075624	ENST00000674681	0	ACTB	actin beta [Source:HGNC Symbol;Acc:HGNC:132]
7	5516908	5531032	14125	WT_un_S5_peak_7417p	335	14.3064	33.5357	29.1954	9545	Promoter (<=1kb)	5526409	5530601	4193	-	ENSG00000075624	ENST00000674681	0	ACTB	actin beta [Source:HGNC Symbol;Acc:HGNC:132]
7	5516908	5531032	14125	WT_un_S5_peak_7417q	429	16.8671	42.9998	38.4901	10003	Promoter (<=1kb)	5526409	5530601	4193	-	ENSG00000075624	ENST00000674681	0	ACTB	actin beta [Source:HGNC Symbol;Acc:HGNC:132]
7	5516908	5531032	14125	WT_un_S5_peak_7417r	144	8.39307	14.4509	10.6062	11034	Promoter (<=1kb)	5526409	5530601	4193	-	ENSG00000075624	ENST00000674681	0	ACTB	actin beta [Source:HGNC Symbol;Acc:HGNC:132]
7	5516908	5531032	14125	WT_un_S5_peak_7417s	199	10.4867	19.9314	15.9036	11631	Promoter (<=1kb)	5526409	5530601	4193	-	ENSG00000075624	ENST00000674681	0	ACTB	actin beta [Source:HGNC Symbol;Acc:HGNC:132]
7	5516908	5531032	14125	WT_un_S5_peak_7417t	141	8.18105	14.1127	10.2783	12045	Promoter (<=1kb)	5526409	5530601	4193	-	ENSG00000075624	ENST00000674681	0	ACTB	actin beta [Source:HGNC Symbol;Acc:HGNC:132]
7	5516908	5531032	14125	WT_un_S5_peak_7417u	399	16.4597	39.9047	35.4492	12689	Promoter (<=1kb)	5526409	5530601	4193	-	ENSG00000075624	ENST00000674681	0	ACTB	actin beta [Source:HGNC Symbol;Acc:HGNC:132]
7	5516908	5531032	14125	WT_un_S5_peak_7417v	1308	39.5312	130.83	125.211	13625	Promoter (<=1kb)	5526409	5530601	4193	-	ENSG00000075624	ENST00000674681	0	ACTB	actin beta [Source:HGNC Symbol;Acc:HGNC:132]
3	171809389	171809972	584	WT_un_S5_peak_5861	23	2.38633	2.34354	0	357	Promoter (<=1kb)	171791790	171809924	18135	-	ENSG00000075651	ENST00000331659	0	PLD1	phospholipase D1 [Source:HGNC Symbol;Acc:HGNC:9067]
3	171810315	171810681	367	WT_un_S5_peak_5862	43	3.2929	4.33276	1.20064	188	Promoter (<=1kb)	171600404	171810483	210080	-	ENSG00000075651	ENST00000351298	0	PLD1	phospholipase D1 [Source:HGNC Symbol;Acc:HGNC:9067]
19	36054473	36054932	460	WT_un_S5_peak_4006	23	2.61444	2.34354	0	157	Promoter (<=1kb)	36054649	36093142	38494	+	ENSG00000075702	ENST00000680489	0	WDR62	WD repeat domain 62 [Source:HGNC Symbol;Acc:HGNC:24502]
3	197298084	197299028	945	WT_un_S5_peak_5943	60	3.98013	6.00752	2.66927	233	Promoter (<=1kb)	197042560	197298576	256017	-	ENSG00000075711	ENST00000346964	0	DLG1	discs large MAGUK scaffold protein 1 [Source:HGNC Symbol;Acc:HGNC:2900]
3	128726149	128726510	362	WT_un_S5_peak_5699	40	3.92167	4.07966	0.98433	165	Promoter (<=1kb)	128726157	128813791	87635	+	ENSG00000075785	ENST00000490093	0	RAB7A	RAB7A, member RAS oncogene family [Source:HGNC Symbol;Acc:HGNC:9788]
12	108529995	108530293	299	WT_un_S5_peak_2230	24	2.89517	2.43654	0	258	Promoter (1-2kb)	108530223	108531968	1746	-	ENSG00000075856	ENST00000619503	1675	SART3	spliceosome associated factor 3, U4/U6 recycling protein [Source:HGNC Symbol;Acc:HGNC:16860]
3	12556900	12557362	463	WT_un_S5_peak_5354	23	2.61444	2.34354	0	246	Promoter (<=1kb)	12557057	12583255	26199	+	ENSG00000075975	ENST00000677237	0	MKRN2	makorin ring finger protein 2 [Source:HGNC Symbol;Acc:HGNC:7113]
11	114398426	114398694	269	WT_un_S5_peak_1789	24	2.553	2.43654	0	81	Promoter (1-2kb)	114400030	114410607	10578	+	ENSG00000076053	ENST00000540163	-1336	RBM7	RNA binding motif protein 7 [Source:HGNC Symbol;Acc:HGNC:9904]
11	114399304	114400931	1628	WT_un_S5_peak_1790a	44	4.19238	4.45165	1.28046	422	Promoter (<=1kb)	114400030	114410607	10578	+	ENSG00000076053	ENST00000540163	0	RBM7	RNA binding motif protein 7 [Source:HGNC Symbol;Acc:HGNC:9904]
11	114399304	114400931	1628	WT_un_S5_peak_1790b	255	12.9712	25.5968	21.4114	1072	Promoter (<=1kb)	114400030	114410607	10578	+	ENSG00000076053	ENST00000540163	0	RBM7	RNA binding motif protein 7 [Source:HGNC Symbol;Acc:HGNC:9904]
3	47380560	47381367	808	WT_un_S5_peak_5491a	35	3.27965	3.59708	0.58391	382	Promoter (<=1kb)	47381011	47413435	32425	+	ENSG00000076201	ENST00000602307	0	PTPN23	protein tyrosine phosphatase non-receptor type 23 [Source:HGNC Symbol;Acc:HGNC:14406]
3	47380560	47381367	808	WT_un_S5_peak_5491b	36	3.08032	3.63925	0.60824	587	Promoter (<=1kb)	47381011	47413435	32425	+	ENSG00000076201	ENST00000602307	0	PTPN23	protein tyrosine phosphatase non-receptor type 23 [Source:HGNC Symbol;Acc:HGNC:14406]
3	36993452	36994032	581	WT_un_S5_peak_5444a	33	3.34471	3.30737	0.35013	113	Promoter (<=1kb)	36993489	37050767	57279	+	ENSG00000076242	ENST00000673899	0	MLH1	mutL homolog 1 [Source:HGNC Symbol;Acc:HGNC:7127]
3	36993452	36994032	581	WT_un_S5_peak_5444b	43	3.81142	4.33964	1.20667	402	Promoter (<=1kb)	36993489	37050767	57279	+	ENSG00000076242	ENST00000673899	0	MLH1	mutL homolog 1 [Source:HGNC Symbol;Acc:HGNC:7127]
8	80146368	80146636	269	WT_un_S5_peak_8007	44	4.19238	4.45165	1.28046	172	Intron (ENST00000379096/ENSG00000076554, intron 1 of 5)	80064475	80158887	94413	-	ENSG00000076554	ENST00000521561	12251	TPD52	tumor protein D52 [Source:HGNC Symbol;Acc:HGNC:12005]
12	109115720	109115988	269	WT_un_S5_peak_2241	26	2.72923	2.69119	0	125	Promoter (<=1kb)	109116595	109268226	151632	+	ENSG00000076555	ENST00000338432	-607	ACACB	acetyl-CoA carboxylase beta [Source:HGNC Symbol;Acc:HGNC:85]
17	28743834	28744322	489	WT_un_S5_peak_3335	126	6.61347	12.6172	8.8483	251	Promoter (<=1kb)	28744005	28749577	5573	+	ENSG00000076604	ENST00000618771	0	TRAF4	TNF receptor associated factor 4 [Source:HGNC Symbol;Acc:HGNC:12034]
10	103192811	103193362	552	WT_un_S5_peak_1166	26	2.21967	2.6949	0	471	Promoter (<=1kb)	103088018	103193306	105289	-	ENSG00000076685	ENST00000343289	0	NT5C2	5'-nucleotidase, cytosolic II [Source:HGNC Symbol;Acc:HGNC:8022]
3	25181236	25181504	269	WT_un_S5_peak_5410	32	3.23733	3.22608	0.28631	125	Intron (ENST00000383772/ENSG00000077092, intron 1 of 7)	25174332	25596455	422124	+	ENSG00000077092	ENST00000383772	6904	RARB	retinoic acid receptor beta [Source:HGNC Symbol;Acc:HGNC:9865]
3	25215192	25215460	269	WT_un_S5_peak_5411	23	2.52497	2.39668	0	78	Intron (ENST00000383772/ENSG00000077092, intron 1 of 7)	25174332	25596455	422124	+	ENSG00000077092	ENST00000383772	40860	RARB	retinoic acid receptor beta [Source:HGNC Symbol;Acc:HGNC:9865]
3	25427221	25428721	1501	WT_un_S5_peak_5414c	23	2.38633	2.34354	0	1446	Promoter (<=1kb)	25428263	25597932	169670	+	ENSG00000077092	ENST00000330688	0	RARB	retinoic acid receptor beta [Source:HGNC Symbol;Acc:HGNC:9865]
3	25426525	25426856	332	WT_un_S5_peak_5413	26	3.0674	2.65555	0	106	Promoter (1-2kb)	25428263	25597932	169670	+	ENSG00000077092	ENST00000330688	-1407	RARB	retinoic acid receptor beta [Source:HGNC Symbol;Acc:HGNC:9865]
3	25427221	25428721	1501	WT_un_S5_peak_5414a	32	3.23733	3.22608	0.28631	220	Promoter (<=1kb)	25428263	25597932	169670	+	ENSG00000077092	ENST00000330688	0	RARB	retinoic acid receptor beta [Source:HGNC Symbol;Acc:HGNC:9865]
3	25427221	25428721	1501	WT_un_S5_peak_5414b	294	14.462	29.4665	25.2089	894	Promoter (<=1kb)	25428263	25597932	169670	+	ENSG00000077092	ENST00000330688	0	RARB	retinoic acid receptor beta [Source:HGNC Symbol;Acc:HGNC:9865]
10	96586591	96587403	813	WT_un_S5_peak_1136	116	6.66565	11.6771	7.95722	302	Promoter (<=1kb)	96518110	96587012	68903	-	ENSG00000077147	ENST00000371142	0	TM9SF3	transmembrane 9 superfamily member 3 [Source:HGNC Symbol;Acc:HGNC:21529]
10	102394321	102394654	334	WT_un_S5_peak_1162	59	4.30949	5.95321	2.61777	95	Promoter (<=1kb)	102394503	102402524	8022	+	ENSG00000077150	ENST00000369966	0	NFKB2	nuclear factor kappa B subunit 2 [Source:HGNC Symbol;Acc:HGNC:7795]
1	202349217	202349542	326	WT_un_S5_peak_744	23	2.78918	2.30424	0	216	Promoter (<=1kb)	202348728	202438242	89515	+	ENSG00000077157	ENST00000476364	489	PPP1R12B	protein phosphatase 1 regulatory subunit 12B [Source:HGNC Symbol;Acc:HGNC:7619]
1	202589162	202589537	376	WT_un_S5_peak_745	50	3.755	5.08049	1.8432	137	3' UTR	202574918	202577250	2333	+	ENSG00000077157	ENST00000618451	14244	PPP1R12B	protein phosphatase 1 regulatory subunit 12B [Source:HGNC Symbol;Acc:HGNC:7619]
2	182715872	182716317	446	WT_un_S5_peak_4627	64	4.92395	6.43923	3.05901	181	Promoter (<=1kb)	182716255	182794464	78210	+	ENSG00000077232	ENST00000679491	0	DNAJC10	DnaJ heat shock protein family (Hsp40) member C10 [Source:HGNC Symbol;Acc:HGNC:24637]
19	40750322	40751698	1377	WT_un_S5_peak_4044a	32	2.80298	3.21061	0.28561	131	Promoter (<=1kb)	40750637	40765021	14385	+	ENSG00000077312	ENST00000601545	0	SNRPA	small nuclear ribonucleoprotein polypeptide A [Source:HGNC Symbol;Acc:HGNC:11151]
19	40750322	40751698	1377	WT_un_S5_peak_4044b	78	4.79475	7.85718	4.36605	650	Promoter (<=1kb)	40750637	40765021	14385	+	ENSG00000077312	ENST00000601545	0	SNRPA	small nuclear ribonucleoprotein polypeptide A [Source:HGNC Symbol;Acc:HGNC:11151]
2	171687814	171688183	370	WT_un_S5_peak_4605	40	3.5795	4.07966	0.98433	192	Promoter (<=1kb)	171687881	171726913	39033	+	ENSG00000077380	ENST00000435234	0	DYNC1I2	dynein cytoplasmic 1 intermediate chain 2 [Source:HGNC Symbol;Acc:HGNC:2964]
7	100585816	100586242	427	WT_un_S5_peak_7615	93	5.57989	9.31879	5.72445	197	Promoter (<=1kb)	100574011	100586129	12119	-	ENSG00000077454	ENST00000310300	0	LRCH4	leucine rich repeats and calponin homology domain containing 4 [Source:HGNC Symbol;Acc:HGNC:6691]
11	95784123	95784391	269	WT_un_S5_peak_1730	40	3.5795	4.07966	0.98433	133	Promoter (<=1kb)	95779489	95783268	3780	-	ENSG00000077458	ENST00000535919	-855	FAM76B	family with sequence similarity 76 member B [Source:HGNC Symbol;Acc:HGNC:28492]
11	95790175	95790998	824	WT_un_S5_peak_1731a	71	4.44237	7.14869	3.7138	151	Promoter (<=1kb)	95783065	95790409	7345	-	ENSG00000077458	ENST00000540054	0	FAM76B	family with sequence similarity 76 member B [Source:HGNC Symbol;Acc:HGNC:28492]
11	95790175	95790998	824	WT_un_S5_peak_1731b	58	4.26559	5.88483	2.56918	624	Promoter (<=1kb)	95783065	95790409	7345	-	ENSG00000077458	ENST00000540054	0	FAM76B	family with sequence similarity 76 member B [Source:HGNC Symbol;Acc:HGNC:28492]
11	74592502	74593002	501	WT_un_S5_peak_1619	60	4.66734	6.09398	2.75146	271	Promoter (<=1kb)	74592556	74595502	2947	+	ENSG00000077514	ENST00000532784	0	POLD3	DNA polymerase delta 3, accessory subunit [Source:HGNC Symbol;Acc:HGNC:20932]
11	74630673	74630941	269	WT_un_S5_peak_1620	23	2.45954	2.30424	0	74	Promoter (1-2kb)	74628863	74640965	12103	+	ENSG00000077514	ENST00000530163	1810	POLD3	DNA polymerase delta 3, accessory subunit [Source:HGNC Symbol;Acc:HGNC:20932]
4	128810874	128811367	494	WT_un_S5_peak_6143	44	3.90533	4.47362	1.30106	256	Promoter (<=1kb)	128811270	128875224	63955	+	ENSG00000077684	ENST00000610919	0	JADE1	jade family PHD finger 1 [Source:HGNC Symbol;Acc:HGNC:30027]
4	128811604	128812843	1240	WT_un_S5_peak_6144a	93	5.35178	9.31879	5.72445	247	Promoter (<=1kb)	128811844	128849078	37235	+	ENSG00000077684	ENST00000507833	0	JADE1	jade family PHD finger 1 [Source:HGNC Symbol;Acc:HGNC:30027]
4	128811604	128812843	1240	WT_un_S5_peak_6144b	88	6.16547	8.84984	5.28456	840	Promoter (<=1kb)	128811844	128849078	37235	+	ENSG00000077684	ENST00000507833	0	JADE1	jade family PHD finger 1 [Source:HGNC Symbol;Acc:HGNC:30027]
X	119574348	119574821	474	WT_un_S5_peak_8679	49	4.26383	4.98931	1.76911	286	Promoter (<=1kb)	119574536	119583347	8812	+	ENSG00000077721	ENST00000346330	0	UBE2A	ubiquitin conjugating enzyme E2 A [Source:HGNC Symbol;Acc:HGNC:12472]
8	38468261	38468900	640	WT_un_S5_peak_7869	163	8.59759	16.3671	12.4422	344	Promoter (<=1kb)	38411138	38468641	57504	-	ENSG00000077782	ENST00000397091	0	FGFR1	fibroblast growth factor receptor 1 [Source:HGNC Symbol;Acc:HGNC:3688]
18	46827487	46827788	302	WT_un_S5_peak_3759	23	2.45954	2.30424	0	92	3' UTR	46843851	46844971	1121	-	ENSG00000078043	ENST00000591865	17183	PIAS2	protein inhibitor of activated STAT 2 [Source:HGNC Symbol;Acc:HGNC:17311]
X	47561205	47561478	274	WT_un_S5_peak_8600	23	2.61444	2.34354	0	140	Promoter (<=1kb)	47561205	47571908	10704	+	ENSG00000078061	ENST00000377045	0	ARAF	A-Raf proto-oncogene, serine/threonine kinase [Source:HGNC Symbol;Acc:HGNC:646]
12	4320786	4321446	661	WT_un_S5_peak_1854	53	4.22146	5.37149	2.11295	486	Promoter (<=1kb)	4321213	4360028	38816	+	ENSG00000078237	ENST00000179259	0	TIGAR	TP53 induced glycolysis regulatory phosphatase [Source:HGNC Symbol;Acc:HGNC:1185]
12	2877143	2877455	313	WT_un_S5_peak_1852	38	2.9881	3.85415	0.80608	122	Promoter (<=1kb)	2877223	2934562	57340	+	ENSG00000078246	ENST00000540184	0	TULP3	TUB like protein 3 [Source:HGNC Symbol;Acc:HGNC:12425]
7	100335693	100336318	626	WT_un_S5_peak_7612	44	3.59816	4.42632	1.28046	484	Promoter (<=1kb)	100319222	100335880	16659	-	ENSG00000078319	ENST00000676200	0	PMS2P1	PMS1 homolog 2, mismatch repair system component pseudogene 1 [Source:HGNC Symbol;Acc:HGNC:9123]
6	12289852	12290821	970	WT_un_S5_peak_6893	131	6.72045	13.1909	9.39886	605	Promoter (<=1kb)	12290361	12297194	6834	+	ENSG00000078401	ENST00000379375	0	EDN1	endothelin 1 [Source:HGNC Symbol;Acc:HGNC:3176]
6	12291536	12291947	412	WT_un_S5_peak_6894	31	3.23343	3.16024	0.2404	224	Promoter (1-2kb)	12290361	12297194	6834	+	ENSG00000078401	ENST00000379375	1175	EDN1	endothelin 1 [Source:HGNC Symbol;Acc:HGNC:3176]
6	12293332	12293750	419	WT_un_S5_peak_6895	24	2.553	2.43654	0	89	Promoter (2-3kb)	12290361	12297194	6834	+	ENSG00000078401	ENST00000379375	2971	EDN1	endothelin 1 [Source:HGNC Symbol;Acc:HGNC:3176]
6	12297987	12298430	444	WT_un_S5_peak_6896	40	3.63653	4.09083	0.99096	297	Distal Intergenic	12290361	12297194	6834	+	ENSG00000078401	ENST00000379375	7626	EDN1	endothelin 1 [Source:HGNC Symbol;Acc:HGNC:3176]
7	100428565	100429736	1172	WT_un_S5_peak_7613a	266	10.8264	26.6287	22.4258	265	Promoter (<=1kb)	100400853	100428679	27827	-	ENSG00000078487	ENST00000398027	0	ZCWPW1	zinc finger CW-type and PWWP domain containing 1 [Source:HGNC Symbol;Acc:HGNC:23486]
7	100428565	100429736	1172	WT_un_S5_peak_7613b	121	6.49233	12.1886	8.43326	930	Promoter (<=1kb)	100400853	100428679	27827	-	ENSG00000078487	ENST00000398027	0	ZCWPW1	zinc finger CW-type and PWWP domain containing 1 [Source:HGNC Symbol;Acc:HGNC:23486]
1	51878462	51879569	1108	WT_un_S5_peak_258a	75	4.66745	7.53305	4.06575	193	Promoter (<=1kb)	51789191	51878805	89615	-	ENSG00000078618	ENST00000354831	0	NRDC	nardilysin convertase [Source:HGNC Symbol;Acc:HGNC:7995]
1	51878462	51879569	1108	WT_un_S5_peak_258b	69	4.97505	6.98198	3.55461	680	Promoter (<=1kb)	51789191	51878805	89615	-	ENSG00000078618	ENST00000354831	0	NRDC	nardilysin convertase [Source:HGNC Symbol;Acc:HGNC:7995]
8	42391428	42392206	779	WT_un_S5_peak_7879	26	3.09502	2.69119	0	356	Promoter (<=1kb)	42391624	42401886	10263	+	ENSG00000078668	ENST00000518563	0	VDAC3	voltage dependent anion channel 3 [Source:HGNC Symbol;Acc:HGNC:12674]
17	77958165	77958676	512	WT_un_S5_peak_3620	116	6.76898	11.6829	7.96234	262	Promoter (<=1kb)	77959240	78106037	146798	+	ENSG00000078687	ENST00000636222	-564	TNRC6C	trinucleotide repeat containing adaptor 6C [Source:HGNC Symbol;Acc:HGNC:29318]
9	119003596	119004564	969	WT_un_S5_peak_8440	59	4.94817	5.94877	2.6174	795	Distal Intergenic	119153458	119208886	55429	-	ENSG00000078725	ENST00000482797	204322	BRINP1	BMP/retinoic acid inducible neural specific 1 [Source:HGNC Symbol;Acc:HGNC:2687]
8	92005003	92005508	506	WT_un_S5_peak_8032	32	3.23733	3.22608	0.28631	367	Promoter (<=1kb)	91970771	92005174	34404	-	ENSG00000079102	ENST00000520978	0	RUNX1T1	RUNX1 partner transcriptional co-repressor 1 [Source:HGNC Symbol;Acc:HGNC:1535]
8	92008304	92008572	269	WT_un_S5_peak_8033	35	3.46081	3.53919	0.53357	132	Promoter (1-2kb)	91991671	92006768	15098	-	ENSG00000079102	ENST00000520047	-1536	RUNX1T1	RUNX1 partner transcriptional co-repressor 1 [Source:HGNC Symbol;Acc:HGNC:1535]
8	92089548	92089901	354	WT_un_S5_peak_8034	24	2.89517	2.43654	0	100	Intron (ENST00000613886/ENSG00000079102, intron 1 of 11)	91959787	92095215	135429	-	ENSG00000079102	ENST00000360348	5314	RUNX1T1	RUNX1 partner transcriptional co-repressor 1 [Source:HGNC Symbol;Acc:HGNC:1535]
18	267799	268403	605	WT_un_S5_peak_3660	86	6.02131	8.60744	5.05654	348	Promoter (<=1kb)	214520	268019	53500	-	ENSG00000079134	ENST00000579232	0	THOC1	THO complex 1 [Source:HGNC Symbol;Acc:HGNC:19070]
5	36606372	36606801	430	WT_un_S5_peak_6291	69	5.29033	6.95301	3.52892	276	Promoter (<=1kb)	36606439	36629572	23134	+	ENSG00000079215	ENST00000513903	0	SLC1A3	solute carrier family 1 member 3 [Source:HGNC Symbol;Acc:HGNC:10941]
5	36632207	36632697	491	WT_un_S5_peak_6292	34	3.38173	3.42749	0.45811	211	Promoter (1-2kb)	36630415	36671233	40819	+	ENSG00000079215	ENST00000680016	1792	SLC1A3	solute carrier family 1 member 3 [Source:HGNC Symbol;Acc:HGNC:10941]
2	216108855	216110048	1194	WT_un_S5_peak_4727a	95	6.25317	9.5596	5.95879	244	Promoter (<=1kb)	216109331	216119139	9809	+	ENSG00000079246	ENST00000429133	0	XRCC5	X-ray repair cross complementing 5 [Source:HGNC Symbol;Acc:HGNC:12833]
2	216108855	216110048	1194	WT_un_S5_peak_4727b	75	4.66745	7.53305	4.06575	599	Promoter (<=1kb)	216109331	216119139	9809	+	ENSG00000079246	ENST00000429133	0	XRCC5	X-ray repair cross complementing 5 [Source:HGNC Symbol;Acc:HGNC:12833]
2	216114505	216115307	803	WT_un_S5_peak_4728	36	3.07067	3.62443	0.59626	430	Promoter (1-2kb)	216113092	216119165	6074	+	ENSG00000079246	ENST00000451695	1413	XRCC5	X-ray repair cross complementing 5 [Source:HGNC Symbol;Acc:HGNC:12833]
2	216116883	216117289	407	WT_un_S5_peak_4729	35	3.46081	3.53919	0.53357	182	Promoter (<=1kb)	216116885	216205423	88539	+	ENSG00000079246	ENST00000460284	0	XRCC5	X-ray repair cross complementing 5 [Source:HGNC Symbol;Acc:HGNC:12833]
10	70170397	70170887	491	WT_un_S5_peak_1061	109	7.0745	10.9302	7.24635	245	Promoter (<=1kb)	70147289	70170514	23226	-	ENSG00000079332	ENST00000373241	0	SAR1A	secretion associated Ras related GTPase 1A [Source:HGNC Symbol;Acc:HGNC:10534]
1	100352298	100352782	485	WT_un_S5_peak_429	75	4.66745	7.53305	4.06575	254	Promoter (<=1kb)	100352467	100499465	146999	+	ENSG00000079335	ENST00000361544	0	CDC14A	cell division cycle 14A [Source:HGNC Symbol;Acc:HGNC:1718]
8	11802396	11802915	520	WT_un_S5_peak_7777	44	3.82659	4.45165	1.28046	319	Promoter (<=1kb)	11802611	11839304	36694	+	ENSG00000079459	ENST00000623368	0	FDFT1	farnesyl-diphosphate farnesyltransferase 1 [Source:HGNC Symbol;Acc:HGNC:3629]
X	68433305	68434165	861	WT_un_S5_peak_8638	35	3.46081	3.53919	0.53357	172	Promoter (<=1kb)	67949349	68433380	484032	-	ENSG00000079482	ENST00000680612	0	OPHN1	oligophrenin 1 [Source:HGNC Symbol;Acc:HGNC:8148]
2	15591785	15592129	345	WT_un_S5_peak_4264	58	4.51201	5.8007	2.49471	191	Promoter (<=1kb)	15591846	15631101	39256	+	ENSG00000079785	ENST00000676916	0	DDX1	DEAD-box helicase 1 [Source:HGNC Symbol;Acc:HGNC:2734]
6	131063065	131063449	385	WT_un_S5_peak_7304	79	4.03227	7.99138	4.48953	151	Promoter (<=1kb)	130839347	131063225	223879	-	ENSG00000079819	ENST00000530481	0	EPB41L2	erythrocyte membrane protein band 4.1 like 2 [Source:HGNC Symbol;Acc:HGNC:3379]
22	50783402	50783919	518	WT_un_S5_peak_5294	40	3.92167	4.07966	0.98433	370	Promoter (<=1kb)	50767501	50783662	16162	-	ENSG00000079974	ENST00000435118	0	RABL2B	RAB, member of RAS oncogene family like 2B [Source:HGNC Symbol;Acc:HGNC:9800]
19	10502362	10502906	545	WT_un_S5_peak_3871	39	3.2873	3.95551	0.88792	372	Promoter (<=1kb)	10486126	10502896	16771	-	ENSG00000079999	ENST00000393623	0	KEAP1	kelch like ECH associated protein 1 [Source:HGNC Symbol;Acc:HGNC:23177]
20	46363621	46364696	1076	WT_un_S5_peak_4977a	33	3.05288	3.30737	0.35013	120	Promoter (<=1kb)	46345980	46364404	18425	-	ENSG00000080189	ENST00000543605	0	SLC35C2	solute carrier family 35 member C2 [Source:HGNC Symbol;Acc:HGNC:17117]
20	46363621	46364696	1076	WT_un_S5_peak_4977b	96	6.26297	9.68188	6.07345	555	Promoter (<=1kb)	46345980	46364404	18425	-	ENSG00000080189	ENST00000543605	0	SLC35C2	solute carrier family 35 member C2 [Source:HGNC Symbol;Acc:HGNC:17117]
9	3525640	3527600	1961	WT_un_S5_peak_8210a	201	10.765	20.1225	16.0808	604	Promoter (<=1kb)	3218297	3525983	307687	-	ENSG00000080298	ENST00000382004	0	RFX3	regulatory factor X3 [Source:HGNC Symbol;Acc:HGNC:9984]
9	3525640	3527600	1961	WT_un_S5_peak_8210b	255	13.337	25.5968	21.4114	983	Promoter (<=1kb)	3218297	3525983	307687	-	ENSG00000080298	ENST00000382004	0	RFX3	regulatory factor X3 [Source:HGNC Symbol;Acc:HGNC:9984]
9	3525640	3527600	1961	WT_un_S5_peak_8210c	44	4.19238	4.45165	1.28046	1670	Promoter (<=1kb)	3218297	3525983	307687	-	ENSG00000080298	ENST00000382004	0	RFX3	regulatory factor X3 [Source:HGNC Symbol;Acc:HGNC:9984]
2	151409836	151410196	361	WT_un_S5_peak_4574	58	4.21122	5.86499	2.55229	165	Promoter (<=1kb)	151409883	151475622	65740	+	ENSG00000080345	ENST00000453091	0	RIF1	replication timing regulatory factor 1 [Source:HGNC Symbol;Acc:HGNC:23207]
4	71186831	71187139	309	WT_un_S5_peak_6064	26	3.09502	2.69119	0	125	Promoter (<=1kb)	71187259	71572083	384825	+	ENSG00000080493	ENST00000264485	-120	SLC4A4	solute carrier family 4 member 4 [Source:HGNC Symbol;Acc:HGNC:11030]
9	2014943	2015322	380	WT_un_S5_peak_8207	43	3.52689	4.33257	1.20064	254	Promoter (<=1kb)	2015186	2193620	178435	+	ENSG00000080503	ENST00000357248	0	SMARCA2	SWI/SNF related, matrix associated, actin dependent regulator of chromatin, subfamily a, member 2 [Source:HGNC Symbol;Acc:HGNC:11098]
9	2016710	2016978	269	WT_un_S5_peak_8208	43	3.7859	4.31451	1.1925	130	Promoter (<=1kb)	2017087	2039689	22603	+	ENSG00000080503	ENST00000457226	-109	SMARCA2	SWI/SNF related, matrix associated, actin dependent regulator of chromatin, subfamily a, member 2 [Source:HGNC Symbol;Acc:HGNC:11098]
6	109094175	109095068	894	WT_un_S5_peak_7257	50	3.98311	5.08049	1.8432	440	Promoter (<=1kb)	108986437	109094819	108383	-	ENSG00000080546	ENST00000436639	0	SESN1	sestrin 1 [Source:HGNC Symbol;Acc:HGNC:21595]
16	30698078	30699150	1073	WT_un_S5_peak_3096a	50	3.755	5.08049	1.8432	320	Promoter (<=1kb)	30698209	30704309	6101	+	ENSG00000080603	ENST00000411466	0	SRCAP	Snf2 related CREBBP activator protein [Source:HGNC Symbol;Acc:HGNC:16974]
16	30698078	30699150	1073	WT_un_S5_peak_3096b	50	3.755	5.08049	1.8432	827	Promoter (<=1kb)	30698209	30704309	6101	+	ENSG00000080603	ENST00000411466	0	SRCAP	Snf2 related CREBBP activator protein [Source:HGNC Symbol;Acc:HGNC:16974]
9	2843664	2844496	833	WT_un_S5_peak_8209	49	4.26383	4.98931	1.76911	332	Promoter (<=1kb)	2804152	2844095	39944	-	ENSG00000080608	ENST00000397885	0	PUM3	pumilio RNA binding family member 3 [Source:HGNC Symbol;Acc:HGNC:29676]
14	73136343	73136871	529	WT_un_S5_peak_2668	52	4.16738	5.28347	2.03301	233	Promoter (<=1kb)	73136418	73173644	37227	+	ENSG00000080815	ENST00000557356	0	PSEN1	presenilin 1 [Source:HGNC Symbol;Acc:HGNC:9508]
3	98522810	98523078	269	WT_un_S5_peak_5626	44	3.82659	4.45165	1.28046	130	Promoter (<=1kb)	98497912	98522887	24976	-	ENSG00000080822	ENST00000502288	0	CLDND1	claudin domain containing 1 [Source:HGNC Symbol;Acc:HGNC:1322]
14	102279976	102280556	581	WT_un_S5_peak_2741a	32	3.01826	3.25718	0.31353	133	Intron (ENST00000521766/ENSG00000080823, intron 2 of 8)	102228831	102264651	35821	-	ENSG00000080823	ENST00000523485	-15325	MOK	MOK protein kinase [Source:HGNC Symbol;Acc:HGNC:9833]
14	102279976	102280556	581	WT_un_S5_peak_2741b	38	3.19528	3.81524	0.77032	548	Intron (ENST00000521766/ENSG00000080823, intron 2 of 8)	102228831	102264651	35821	-	ENSG00000080823	ENST00000523485	-15325	MOK	MOK protein kinase [Source:HGNC Symbol;Acc:HGNC:9833]
14	102304820	102305107	288	WT_un_S5_peak_2742	23	2.38633	2.34354	0	98	Promoter (<=1kb)	102250895	102305134	54240	-	ENSG00000080823	ENST00000517537	27	MOK	MOK protein kinase [Source:HGNC Symbol;Acc:HGNC:9833]
14	102086756	102087264	509	WT_un_S5_peak_2740	243	7.67182	24.3779	20.2231	224	Promoter (<=1kb)	102080742	102087044	6303	-	ENSG00000080824	ENST00000216281	0	HSP90AA1	heat shock protein 90 alpha family class A member 1 [Source:HGNC Symbol;Acc:HGNC:5253]
20	37095634	37096224	591	WT_un_S5_peak_4930	101	5.7233	10.1073	6.47256	252	Promoter (<=1kb)	36996349	37095997	99649	-	ENSG00000080839	ENST00000373664	0	RBL1	RB transcriptional corepressor like 1 [Source:HGNC Symbol;Acc:HGNC:9893]
18	2571355	2571786	432	WT_un_S5_peak_3663	24	2.89517	2.43654	0	134	Promoter (<=1kb)	2571557	2616635	45079	+	ENSG00000080986	ENST00000261597	0	NDC80	NDC80 kinetochore complex component [Source:HGNC Symbol;Acc:HGNC:16909]
15	50908497	50908861	365	WT_un_S5_peak_2851	39	3.49373	3.95231	0.88518	267	Promoter (<=1kb)	50908672	50950149	41478	+	ENSG00000081014	ENST00000561441	0	AP4E1	adaptor related protein complex 4 subunit epsilon 1 [Source:HGNC Symbol;Acc:HGNC:573]
1	113812270	113812918	649	WT_un_S5_peak_464	38	3.40435	3.82039	0.77264	254	Promoter (<=1kb)	113761832	113812476	50645	-	ENSG00000081019	ENST00000261441	0	RSBN1	round spermatid basic protein 1 [Source:HGNC Symbol;Acc:HGNC:25642]
4	74098607	74099566	960	WT_un_S5_peak_6067	50	3.755	5.08049	1.8432	533	Promoter (<=1kb)	74097040	74099195	2156	-	ENSG00000081041	ENST00000508487	0	CXCL2	C-X-C motif chemokine ligand 2 [Source:HGNC Symbol;Acc:HGNC:4603]
5	134123497	134123884	388	WT_un_S5_peak_6654	26	2.88188	2.69658	0	183	Promoter (<=1kb)	134123618	134142814	19197	+	ENSG00000081059	ENST00000519037	0	TCF7	transcription factor 7 [Source:HGNC Symbol;Acc:HGNC:11639]
6	108074318	108074798	481	WT_un_S5_peak_7254	55	4.31406	5.50845	2.22843	344	Promoter (<=1kb)	108041409	108074741	33333	-	ENSG00000081087	ENST00000193322	0	OSTM1	osteoclastogenesis associated transmembrane protein 1 [Source:HGNC Symbol;Acc:HGNC:21652]
3	101574027	101574749	723	WT_un_S5_peak_5636	35	3.46081	3.53919	0.53357	53	Promoter (<=1kb)	101574180	101594465	20286	+	ENSG00000081154	ENST00000265260	0	PCNP	PEST proteolytic signal containing nuclear protein [Source:HGNC Symbol;Acc:HGNC:30023]
14	67619686	67620125	440	WT_un_S5_peak_2644	80	5.98874	8.01858	4.50918	164	Promoter (<=1kb)	67619920	67651708	31789	+	ENSG00000081181	ENST00000261783	0	ARG2	arginase 2 [Source:HGNC Symbol;Acc:HGNC:664]
5	88883896	88884190	295	WT_un_S5_peak_6488	23	2.61444	2.34354	0	255	Promoter (<=1kb)	88718274	88883747	165474	-	ENSG00000081189	ENST00000636998	-149	MEF2C	myocyte enhancer factor 2C [Source:HGNC Symbol;Acc:HGNC:6996]
2	196170575	196171762	1188	WT_un_S5_peak_4667	234	11.6895	23.4774	19.3461	875	Promoter (<=1kb)	196133583	196171578	37996	-	ENSG00000081320	ENST00000263955	0	STK17B	serine/threonine kinase 17b [Source:HGNC Symbol;Acc:HGNC:11396]
5	141923543	141924083	541	WT_un_S5_peak_6692	50	3.755	5.08049	1.8432	166	Promoter (<=1kb)	141923855	141940120	16266	+	ENSG00000081791	ENST00000194118	0	DELE1	DAP3 binding cell death enhancer 1 [Source:HGNC Symbol;Acc:HGNC:28969]
7	151298247	151298617	371	WT_un_S5_peak_7731	26	2.82589	2.66609	0	195	Distal Intergenic	151242721	151277896	35176	-	ENSG00000082014	ENST00000491651	-20351	SMARCD3	SWI/SNF related, matrix associated, actin dependent regulator of chromatin, subfamily d, member 3 [Source:HGNC Symbol;Acc:HGNC:11108]
5	37379246	37379594	349	WT_un_S5_peak_6295	55	4.26412	5.5001	2.22062	176	Promoter (<=1kb)	37379285	37697907	318623	+	ENSG00000082068	ENST00000504564	0	WDR70	WD repeat domain 70 [Source:HGNC Symbol;Acc:HGNC:25495]
5	37738234	37738502	269	WT_un_S5_peak_6296	32	3.23733	3.22608	0.28631	138	Intron (ENST00000511906/ENSG00000082068, intron 14 of 14)	37724843	37752670	27828	+	ENSG00000082068	ENST00000508730	13391	WDR70	WD repeat domain 70 [Source:HGNC Symbol;Acc:HGNC:25495]
5	37740522	37740912	391	WT_un_S5_peak_6297	32	3.23733	3.22608	0.28631	150	Intron (ENST00000511906/ENSG00000082068, intron 14 of 14)	37724843	37752670	27828	+	ENSG00000082068	ENST00000508730	15679	WDR70	WD repeat domain 70 [Source:HGNC Symbol;Acc:HGNC:25495]
2	200811192	200812278	1087	WT_un_S5_peak_4679a	38	3.44846	3.88541	0.82322	255	Promoter (<=1kb)	200811546	200818083	6538	+	ENSG00000082153	ENST00000452206	0	BZW1	basic leucine zipper and W2 domains 1 [Source:HGNC Symbol;Acc:HGNC:18380]
2	200811192	200812278	1087	WT_un_S5_peak_4679b	142	7.17667	14.2141	10.3752	770	Promoter (<=1kb)	200811546	200818083	6538	+	ENSG00000082153	ENST00000452206	0	BZW1	basic leucine zipper and W2 domains 1 [Source:HGNC Symbol;Acc:HGNC:18380]
2	134918803	134919141	339	WT_un_S5_peak_4549	54	4.55817	5.42044	2.14934	193	Promoter (<=1kb)	134918822	134954799	35978	+	ENSG00000082258	ENST00000452839	0	CCNT2	cyclin T2 [Source:HGNC Symbol;Acc:HGNC:1600]
6	70412905	70413349	445	WT_un_S5_peak_7172	96	6.26297	9.68188	6.07345	217	Promoter (<=1kb)	70412941	70428344	15404	+	ENSG00000082269	ENST00000514185	0	FAM135A	family with sequence similarity 135 member A [Source:HGNC Symbol;Acc:HGNC:21084]
18	5468590	5468861	272	WT_un_S5_peak_3676	35	3.46081	3.53919	0.53357	123	Promoter (2-3kb)	5392386	5466363	73978	-	ENSG00000082397	ENST00000542652	-2227	EPB41L3	erythrocyte membrane protein band 4.1 like 3 [Source:HGNC Symbol;Acc:HGNC:3380]
1	214989413	214989681	269	WT_un_S5_peak_799	32	3.23733	3.22608	0.28631	145	Distal Intergenic	215005775	215236020	230246	+	ENSG00000082482	ENST00000486921	-16094	KCNK2	potassium two pore domain channel subfamily K member 2 [Source:HGNC Symbol;Acc:HGNC:6277]
5	154937877	154938273	397	WT_un_S5_peak_6743	43	3.79245	4.39973	1.26294	137	Promoter (<=1kb)	154887411	154938211	50801	-	ENSG00000082516	ENST00000285873	0	GEMIN5	gem nuclear organelle associated protein 5 [Source:HGNC Symbol;Acc:HGNC:20043]
3	120094034	120095914	1881	WT_un_S5_peak_5678a	40	3.92167	4.07966	0.98433	199	Promoter (<=1kb)	119821321	120094447	273127	-	ENSG00000082701	ENST00000264235	0	GSK3B	glycogen synthase kinase 3 beta [Source:HGNC Symbol;Acc:HGNC:4617]
3	120094034	120095914	1881	WT_un_S5_peak_5678b	98	6.41522	9.81349	6.1887	1239	Promoter (<=1kb)	119821321	120094447	273127	-	ENSG00000082701	ENST00000264235	0	GSK3B	glycogen synthase kinase 3 beta [Source:HGNC Symbol;Acc:HGNC:4617]
3	149812469	149813401	933	WT_un_S5_peak_5761a	56	4.76702	5.69186	2.39319	165	Promoter (<=1kb)	149812770	149962122	149353	+	ENSG00000082996	ENST00000344229	0	RNF13	ring finger protein 13 [Source:HGNC Symbol;Acc:HGNC:10057]
3	149812469	149813401	933	WT_un_S5_peak_5761b	49	4.26383	4.98931	1.76911	773	Promoter (<=1kb)	149812770	149962122	149353	+	ENSG00000082996	ENST00000344229	0	RNF13	ring finger protein 13 [Source:HGNC Symbol;Acc:HGNC:10057]
16	23641073	23641522	450	WT_un_S5_peak_3073	50	4.27388	5.00389	1.78125	218	Promoter (<=1kb)	23603165	23641310	38146	-	ENSG00000083093	ENST00000261584	0	PALB2	partner and localizer of BRCA2 [Source:HGNC Symbol;Acc:HGNC:26144]
6	89638360	89639035	676	WT_un_S5_peak_7236	113	7.00117	11.3449	7.63533	246	Promoter (<=1kb)	89568144	89638482	70339	-	ENSG00000083099	ENST00000520897	0	LYRM2	LYR motif containing 2 [Source:HGNC Symbol;Acc:HGNC:25229]
9	86354352	86354841	490	WT_un_S5_peak_8364	23	2.61444	2.34354	0	10	Promoter (<=1kb)	86287733	86354410	66678	-	ENSG00000083223	ENST00000277141	0	TUT7	terminal uridylyl transferase 7 [Source:HGNC Symbol;Acc:HGNC:25817]
5	72816077	72817369	1293	WT_un_S5_peak_6429	93	5.57989	9.31879	5.72445	691	Promoter (<=1kb)	72816312	72916733	100422	+	ENSG00000083312	ENST00000680533	0	TNPO1	transportin 1 [Source:HGNC Symbol;Acc:HGNC:6401]
5	72848030	72848441	412	WT_un_S5_peak_6430	85	4.57397	8.538	5.0048	232	Promoter (<=1kb)	72848121	72914368	66248	+	ENSG00000083312	ENST00000679378	0	TNPO1	transportin 1 [Source:HGNC Symbol;Acc:HGNC:6401]
13	72781430	72782130	701	WT_un_S5_peak_2441	59	4.94817	5.94877	2.6174	401	Promoter (<=1kb)	72752169	72781900	29732	-	ENSG00000083520	ENST00000377767	0	DIS3	DIS3 homolog, exosome endoribonuclease and 3'-5' exoribonuclease [Source:HGNC Symbol;Acc:HGNC:20604]
13	44918077	44918617	541	WT_un_S5_peak_2400	45	3.95404	4.54325	1.36717	189	Distal Intergenic	44939249	44989471	50223	-	ENSG00000083635	ENST00000379161	70854	NUFIP1	nuclear FMR1 interacting protein 1 [Source:HGNC Symbol;Acc:HGNC:8057]
13	44989219	44989731	513	WT_un_S5_peak_2401	76	4.356	7.66459	4.19151	210	Promoter (<=1kb)	44939249	44989471	50223	-	ENSG00000083635	ENST00000379161	0	NUFIP1	nuclear FMR1 interacting protein 1 [Source:HGNC Symbol;Acc:HGNC:8057]
5	41870331	41870755	425	WT_un_S5_peak_6325	24	2.89517	2.43654	0	127	Promoter (<=1kb)	41730065	41870425	140361	-	ENSG00000083720	ENST00000196371	0	OXCT1	3-oxoacid CoA-transferase 1 [Source:HGNC Symbol;Acc:HGNC:8527]
19	58475900	58476491	592	WT_un_S5_peak_4214a	44	3.8578	4.40577	1.26815	252	Promoter (<=1kb)	58476146	58478124	1979	+	ENSG00000083838	ENST00000594468	0	ZNF446	zinc finger protein 446 [Source:HGNC Symbol;Acc:HGNC:21036]
19	58475900	58476491	592	WT_un_S5_peak_4214b	36	3.63673	3.6957	0.65998	556	Promoter (<=1kb)	58476146	58478124	1979	+	ENSG00000083838	ENST00000594468	0	ZNF446	zinc finger protein 446 [Source:HGNC Symbol;Acc:HGNC:21036]
19	58386762	58387693	932	WT_un_S5_peak_4213	249	11.907	24.9544	20.7908	538	Promoter (<=1kb)	58387264	58394804	7541	+	ENSG00000083845	ENST00000598098	0	RPS5	ribosomal protein S5 [Source:HGNC Symbol;Acc:HGNC:10426]
4	186724251	186724519	269	WT_un_S5_peak_6197	32	3.23733	3.22608	0.28631	226	Promoter (<=1kb)	186587794	186723856	136063	-	ENSG00000083857	ENST00000441802	-395	FAT1	FAT atypical cadherin 1 [Source:HGNC Symbol;Acc:HGNC:3595]
4	186724697	186724965	269	WT_un_S5_peak_6198	26	3.09502	2.69119	0	213	Promoter (<=1kb)	186587794	186723856	136063	-	ENSG00000083857	ENST00000441802	-841	FAT1	FAT atypical cadherin 1 [Source:HGNC Symbol;Acc:HGNC:3595]
4	186725153	186725472	320	WT_un_S5_peak_6199	26	3.09502	2.69119	0	128	Promoter (1-2kb)	186708363	186726722	18360	-	ENSG00000083857	ENST00000509647	1250	FAT1	FAT atypical cadherin 1 [Source:HGNC Symbol;Acc:HGNC:3595]
4	186726623	186727143	521	WT_un_S5_peak_6200	40	3.92167	4.07966	0.98433	342	Promoter (<=1kb)	186708363	186726722	18360	-	ENSG00000083857	ENST00000509647	0	FAT1	FAT atypical cadherin 1 [Source:HGNC Symbol;Acc:HGNC:3595]
3	87227022	87227508	487	WT_un_S5_peak_5622	87	6.08558	8.72862	5.16636	287	Promoter (<=1kb)	87227271	87255548	28278	+	ENSG00000083937	ENST00000471660	0	CHMP2B	charged multivesicular body protein 2B [Source:HGNC Symbol;Acc:HGNC:24537]
1	39738824	39739158	335	WT_un_S5_peak_195	41	3.15842	4.14638	1.04025	135	Promoter (<=1kb)	39738879	39742481	3603	+	ENSG00000084072	ENST00000485507	0	PPIE	peptidylprolyl isomerase E [Source:HGNC Symbol;Acc:HGNC:9258]
2	96208100	96209016	917	WT_un_S5_peak_4458a	35	2.98733	3.53412	0.53357	282	Promoter (<=1kb)	96184859	96208827	23969	-	ENSG00000084090	ENST00000337288	0	STARD7	StAR related lipid transfer domain containing 7 [Source:HGNC Symbol;Acc:HGNC:18063]
2	96208100	96209016	917	WT_un_S5_peak_4458b	29	2.64517	2.95763	0.06978	732	Promoter (<=1kb)	96184859	96208827	23969	-	ENSG00000084090	ENST00000337288	0	STARD7	StAR related lipid transfer domain containing 7 [Source:HGNC Symbol;Acc:HGNC:18063]
12	108826321	108826607	287	WT_un_S5_peak_2238	26	3.09502	2.69119	0	117	Promoter (<=1kb)	108811258	108826394	15137	-	ENSG00000084112	ENST00000546812	0	SSH1	slingshot protein phosphatase 1 [Source:HGNC Symbol;Acc:HGNC:30579]
11	67583626	67584069	444	WT_un_S5_peak_1579	80	4.47327	8.0219	4.51247	242	Promoter (<=1kb)	67583742	67586656	2915	+	ENSG00000084207	ENST00000398603	0	GSTP1	glutathione S-transferase pi 1 [Source:HGNC Symbol;Acc:HGNC:4638]
12	14803409	14803701	293	WT_un_S5_peak_1914	40	3.92167	4.07966	0.98433	143	Promoter (<=1kb)	14784582	14803478	18897	-	ENSG00000084463	ENST00000261167	0	WBP11	WW domain binding protein 11 [Source:HGNC Symbol;Acc:HGNC:16461]
1	32222147	32222415	269	WT_un_S5_peak_154	23	2.41556	2.38587	0	215	Promoter (<=1kb)	32222405	32231333	8929	+	ENSG00000084623	ENST00000676679	0	EIF3I	eukaryotic translation initiation factor 3 subunit I [Source:HGNC Symbol;Acc:HGNC:3272]
1	31155040	31155537	498	WT_un_S5_peak_146	46	3.51394	4.69327	1.50884	104	Distal Intergenic	31180540	31181676	1137	-	ENSG00000084628	ENST00000528449	26139	NKAIN1	sodium/potassium transporting ATPase interacting 1 [Source:HGNC Symbol;Acc:HGNC:25743]
1	32179466	32180489	1024	WT_un_S5_peak_150a	33	3.10266	3.33205	0.37367	153	Promoter (<=1kb)	32179675	32198285	18611	+	ENSG00000084652	ENST00000373610	0	TXLNA	taxilin alpha [Source:HGNC Symbol;Acc:HGNC:30685]
1	32179466	32180489	1024	WT_un_S5_peak_150b	34	3.16461	3.42031	0.45249	594	Promoter (<=1kb)	32179675	32198285	18611	+	ENSG00000084652	ENST00000373610	0	TXLNA	taxilin alpha [Source:HGNC Symbol;Acc:HGNC:30685]
2	25982020	25982364	345	WT_un_S5_peak_4287	35	3.46081	3.53919	0.53357	224	Promoter (<=1kb)	25926598	25982497	55900	-	ENSG00000084731	ENST00000264712	133	KIF3C	kinesin family member 3C [Source:HGNC Symbol;Acc:HGNC:6321]
2	27217245	27217673	429	WT_un_S5_peak_4294	23	2.38633	2.34354	0	201	Promoter (<=1kb)	27217369	27243943	26575	+	ENSG00000084774	ENST00000264705	0	CAD	carbamoyl-phosphate synthetase 2, aspartate transcarbamylase, and dihydroorotase [Source:HGNC Symbol;Acc:HGNC:1424]
5	69369147	69369571	425	WT_un_S5_peak_6420	49	3.92836	4.92356	1.71247	236	Promoter (<=1kb)	69350984	69369520	18537	-	ENSG00000085231	ENST00000380822	0	AK6	adenylate kinase 6 [Source:HGNC Symbol;Acc:HGNC:49151]
3	169772941	169773836	896	WT_un_S5_peak_5850	100	6.5859	10.0815	6.44685	317	Promoter (<=1kb)	169773396	169789716	16321	+	ENSG00000085274	ENST00000349841	0	MYNN	myoneurin [Source:HGNC Symbol;Acc:HGNC:14955]
6	105402717	105403162	446	WT_un_S5_peak_7248	36	3.29878	3.62443	0.59626	369	Promoter (<=1kb)	105273218	105403082	129865	-	ENSG00000085377	ENST00000652536	0	PREP	prolyl endopeptidase [Source:HGNC Symbol;Acc:HGNC:9358]
18	12946892	12948407	1516	WT_un_S5_peak_3707a	90	5.5383	9.09741	5.51859	254	Promoter (<=1kb)	12947133	12955610	8478	+	ENSG00000085415	ENST00000592170	0	SEH1L	SEH1 like nucleoporin [Source:HGNC Symbol;Acc:HGNC:30379]
18	12946892	12948407	1516	WT_un_S5_peak_3707b	65	4.642	6.53583	3.15235	696	Promoter (<=1kb)	12947133	12955610	8478	+	ENSG00000085415	ENST00000592170	0	SEH1L	SEH1 like nucleoporin [Source:HGNC Symbol;Acc:HGNC:30379]
18	12946892	12948407	1516	WT_un_S5_peak_3707c	63	4.55202	6.3968	3.03752	1289	Promoter (<=1kb)	12947133	12955610	8478	+	ENSG00000085415	ENST00000592170	0	SEH1L	SEH1 like nucleoporin [Source:HGNC Symbol;Acc:HGNC:30379]
1	109041815	109042268	454	WT_un_S5_peak_444	135	6.06683	13.5895	9.77746	250	Promoter (<=1kb)	108970214	109041986	71773	-	ENSG00000085433	ENST00000400794	0	WDR47	WD repeat domain 47 [Source:HGNC Symbol;Acc:HGNC:29141]
2	223944997	223945464	468	WT_un_S5_peak_4754	35	3.46081	3.53919	0.53357	220	Promoter (<=1kb)	223875348	223945335	69988	-	ENSG00000085449	ENST00000233055	0	WDFY1	WD repeat and FYVE domain containing 1 [Source:HGNC Symbol;Acc:HGNC:20451]
1	111425891	111426304	414	WT_un_S5_peak_456	35	3.46081	3.53919	0.53357	139	Promoter (1-2kb)	111414319	111427735	13417	-	ENSG00000085465	ENST00000369732	1431	OVGP1	oviductal glycoprotein 1 [Source:HGNC Symbol;Acc:HGNC:8524]
1	108192577	108192916	340	WT_un_S5_peak_438	40	3.5795	4.07966	0.98433	198	Promoter (<=1kb)	108134823	108192818	57996	-	ENSG00000085491	ENST00000370041	0	SLC25A24	solute carrier family 25 member 24 [Source:HGNC Symbol;Acc:HGNC:20662]
16	15094000	15094546	547	WT_un_S5_peak_3051	56	4.76702	5.69186	2.39319	217	Promoter (<=1kb)	15060033	15094272	34240	-	ENSG00000085721	ENST00000198767	0	RRN3	RRN3 homolog, RNA polymerase I transcription factor [Source:HGNC Symbol;Acc:HGNC:30346]
1	52404294	52404894	601	WT_un_S5_peak_262	78	5.514	7.86411	4.37249	316	Promoter (<=1kb)	52372829	52404423	31595	-	ENSG00000085840	ENST00000371568	0	ORC1	origin recognition complex subunit 1 [Source:HGNC Symbol;Acc:HGNC:8487]
19	16542425	16542693	269	WT_un_S5_peak_3939	46	3.71527	4.60285	1.42296	121	Promoter (<=1kb)	16517894	16542437	24544	-	ENSG00000085872	ENST00000546361	0	CHERP	calcium homeostasis endoplasmic reticulum protein [Source:HGNC Symbol;Acc:HGNC:16930]
1	46247700	46248126	427	WT_un_S5_peak_246	44	3.59816	4.42632	1.28046	194	Promoter (<=1kb)	46247700	46261015	13316	+	ENSG00000085999	ENST00000493985	0	RAD54L	RAD54 like [Source:HGNC Symbol;Acc:HGNC:9826]
9	33024769	33026158	1390	WT_un_S5_peak_8278a	174	8.08911	17.4005	13.4388	554	Promoter (<=1kb)	33025273	33039907	14635	+	ENSG00000086061	ENST00000330899	0	DNAJA1	DnaJ heat shock protein family (Hsp40) member A1 [Source:HGNC Symbol;Acc:HGNC:5229]
9	33024769	33026158	1390	WT_un_S5_peak_8278b	35	3.26231	3.55932	0.55019	1196	Promoter (<=1kb)	33025273	33039907	14635	+	ENSG00000086061	ENST00000330899	0	DNAJA1	DnaJ heat shock protein family (Hsp40) member A1 [Source:HGNC Symbol;Acc:HGNC:5229]
9	33039977	33040262	286	WT_un_S5_peak_8279	48	3.88381	4.85653	1.6543	110	Downstream (1-2kb)	33034260	33037332	3073	+	ENSG00000086061	ENST00000465677	5717	DNAJA1	DnaJ heat shock protein family (Hsp40) member A1 [Source:HGNC Symbol;Acc:HGNC:5229]
9	33041169	33041483	315	WT_un_S5_peak_8280	30	2.89282	3.03845	0.13897	168	Downstream (<1kb)	33034260	33037332	3073	+	ENSG00000086061	ENST00000465677	6909	DNAJA1	DnaJ heat shock protein family (Hsp40) member A1 [Source:HGNC Symbol;Acc:HGNC:5229]
9	33044344	33044695	352	WT_un_S5_peak_8281	36	3.07067	3.62443	0.59626	156	3' UTR	33034260	33037332	3073	+	ENSG00000086061	ENST00000465677	10084	DNAJA1	DnaJ heat shock protein family (Hsp40) member A1 [Source:HGNC Symbol;Acc:HGNC:5229]
9	33290073	33291184	1112	WT_un_S5_peak_8284	163	8.25058	16.3025	12.3838	593	Promoter (<=1kb)	33290512	33365283	74772	+	ENSG00000086102	ENST00000379521	0	NFX1	nuclear transcription factor, X-box binding 1 [Source:HGNC Symbol;Acc:HGNC:7803]
5	62403451	62404174	724	WT_un_S5_peak_6398a	60	4.34162	6.06954	2.72791	159	Promoter (<=1kb)	62347284	62403929	56646	-	ENSG00000086189	ENST00000651114	0	DIMT1	DIMT1 rRNA methyltransferase and ribosome maturation factor [Source:HGNC Symbol;Acc:HGNC:30217]
5	62403451	62404174	724	WT_un_S5_peak_6398b	58	4.22446	5.88582	2.57002	554	Promoter (<=1kb)	62347284	62403929	56646	-	ENSG00000086189	ENST00000651114	0	DIMT1	DIMT1 rRNA methyltransferase and ribosome maturation factor [Source:HGNC Symbol;Acc:HGNC:30217]
5	62412685	62413081	397	WT_un_S5_peak_6399	69	4.57679	6.9076	3.48961	203	Promoter (<=1kb)	62412763	62628582	215820	+	ENSG00000086200	ENST00000325324	0	IPO11	importin 11 [Source:HGNC Symbol;Acc:HGNC:20628]
5	150694927	150695195	269	WT_un_S5_peak_6718	24	2.90199	2.44511	0	166	Promoter (<=1kb)	150690794	150694833	4040	-	ENSG00000086589	ENST00000520132	-94	RBM22	RNA binding motif protein 22 [Source:HGNC Symbol;Acc:HGNC:25503]
5	150700896	150701236	341	WT_un_S5_peak_6719	35	3.23863	3.57756	0.56548	163	Promoter (<=1kb)	150690792	150701062	10271	-	ENSG00000086589	ENST00000199814	0	RBM22	RNA binding motif protein 22 [Source:HGNC Symbol;Acc:HGNC:25503]
12	123584364	123584632	269	WT_un_S5_peak_2293	25	2.72974	2.53736	0	124	Promoter (<=1kb)	123584533	123590446	5914	+	ENSG00000086598	ENST00000438031	0	TMED2	transmembrane p24 trafficking protein 2 [Source:HGNC Symbol;Acc:HGNC:16996]
X	53683188	53683676	489	WT_un_S5_peak_8628	26	3.09502	2.69119	0	129	Promoter (<=1kb)	53532096	53684169	152074	-	ENSG00000086758	ENST00000342160	493	HUWE1	HECT, UBA and WWE domain containing E3 ubiquitin protein ligase 1 [Source:HGNC Symbol;Acc:HGNC:30892]
X	53683845	53684565	721	WT_un_S5_peak_8629	69	5.29033	6.95301	3.52892	360	Promoter (<=1kb)	53532096	53684169	152074	-	ENSG00000086758	ENST00000342160	0	HUWE1	HECT, UBA and WWE domain containing E3 ubiquitin protein ligase 1 [Source:HGNC Symbol;Acc:HGNC:30892]
4	8440525	8440826	302	WT_un_S5_peak_5972	40	3.92167	4.07966	0.98433	190	Promoter (<=1kb)	8366282	8440723	74442	-	ENSG00000087008	ENST00000356406	0	ACOX3	acyl-CoA oxidase 3, pristanoyl [Source:HGNC Symbol;Acc:HGNC:121]
11	95923670	95924448	779	WT_un_S5_peak_1732	131	6.72045	13.1909	9.39886	533	Promoter (<=1kb)	95821766	95924123	102358	-	ENSG00000087053	ENST00000675896	0	MTMR2	myotubularin related protein 2 [Source:HGNC Symbol;Acc:HGNC:7450]
19	48872061	48882564	10504	WT_un_S5_peak_4140a	772	25.519	77.2124	72.185	424	Promoter (<=1kb)	48872421	48876058	3638	+	ENSG00000087074	ENST00000200453	0	PPP1R15A	protein phosphatase 1 regulatory subunit 15A [Source:HGNC Symbol;Acc:HGNC:14375]
19	48872061	48882564	10504	WT_un_S5_peak_4140b	88	5.73653	8.86613	5.30023	1902	Promoter (<=1kb)	48872421	48876058	3638	+	ENSG00000087074	ENST00000200453	0	PPP1R15A	protein phosphatase 1 regulatory subunit 15A [Source:HGNC Symbol;Acc:HGNC:14375]
19	48872061	48882564	10504	WT_un_S5_peak_4140c	93	6.05461	9.36011	5.76493	2645	Promoter (<=1kb)	48872421	48876058	3638	+	ENSG00000087074	ENST00000200453	0	PPP1R15A	protein phosphatase 1 regulatory subunit 15A [Source:HGNC Symbol;Acc:HGNC:14375]
19	48872061	48882564	10504	WT_un_S5_peak_4140d	116	7.05749	11.6829	7.96234	3202	Promoter (<=1kb)	48872421	48876058	3638	+	ENSG00000087074	ENST00000200453	0	PPP1R15A	protein phosphatase 1 regulatory subunit 15A [Source:HGNC Symbol;Acc:HGNC:14375]
19	48872061	48882564	10504	WT_un_S5_peak_4140e	160	8.40476	16.0487	12.1396	3587	Promoter (<=1kb)	48872421	48876058	3638	+	ENSG00000087074	ENST00000200453	0	PPP1R15A	protein phosphatase 1 regulatory subunit 15A [Source:HGNC Symbol;Acc:HGNC:14375]
19	48872061	48882564	10504	WT_un_S5_peak_4140f	126	6.39636	12.6172	8.8483	4308	Promoter (<=1kb)	48872421	48876058	3638	+	ENSG00000087074	ENST00000200453	0	PPP1R15A	protein phosphatase 1 regulatory subunit 15A [Source:HGNC Symbol;Acc:HGNC:14375]
19	48872061	48882564	10504	WT_un_S5_peak_4140g	126	6.39636	12.6172	8.8483	4766	Promoter (<=1kb)	48872421	48876058	3638	+	ENSG00000087074	ENST00000200453	0	PPP1R15A	protein phosphatase 1 regulatory subunit 15A [Source:HGNC Symbol;Acc:HGNC:14375]
19	48872061	48882564	10504	WT_un_S5_peak_4140h	75	4.66745	7.53305	4.06575	5348	Promoter (<=1kb)	48872421	48876058	3638	+	ENSG00000087074	ENST00000200453	0	PPP1R15A	protein phosphatase 1 regulatory subunit 15A [Source:HGNC Symbol;Acc:HGNC:14375]
19	48872061	48882564	10504	WT_un_S5_peak_4140i	100	5.04033	10.0802	6.44639	5831	Promoter (<=1kb)	48872421	48876058	3638	+	ENSG00000087074	ENST00000200453	0	PPP1R15A	protein phosphatase 1 regulatory subunit 15A [Source:HGNC Symbol;Acc:HGNC:14375]
19	48872061	48882564	10504	WT_un_S5_peak_4140j	154	8.04394	15.4493	11.5618	6620	Promoter (<=1kb)	48872421	48876058	3638	+	ENSG00000087074	ENST00000200453	0	PPP1R15A	protein phosphatase 1 regulatory subunit 15A [Source:HGNC Symbol;Acc:HGNC:14375]
19	48872061	48882564	10504	WT_un_S5_peak_4140k	41	3.15842	4.14638	1.04025	7728	Promoter (<=1kb)	48872421	48876058	3638	+	ENSG00000087074	ENST00000200453	0	PPP1R15A	protein phosphatase 1 regulatory subunit 15A [Source:HGNC Symbol;Acc:HGNC:14375]
19	48872061	48882564	10504	WT_un_S5_peak_4140l	69	4.18492	6.9063	3.48859	8208	Promoter (<=1kb)	48872421	48876058	3638	+	ENSG00000087074	ENST00000200453	0	PPP1R15A	protein phosphatase 1 regulatory subunit 15A [Source:HGNC Symbol;Acc:HGNC:14375]
19	48872061	48882564	10504	WT_un_S5_peak_4140m	41	3.63622	4.10359	1.00173	9444	Promoter (<=1kb)	48872421	48876058	3638	+	ENSG00000087074	ENST00000200453	0	PPP1R15A	protein phosphatase 1 regulatory subunit 15A [Source:HGNC Symbol;Acc:HGNC:14375]
19	48872061	48882564	10504	WT_un_S5_peak_4140n	50	3.98311	5.08049	1.8432	9913	Promoter (<=1kb)	48872421	48876058	3638	+	ENSG00000087074	ENST00000200453	0	PPP1R15A	protein phosphatase 1 regulatory subunit 15A [Source:HGNC Symbol;Acc:HGNC:14375]
19	48872061	48882564	10504	WT_un_S5_peak_4140o	41	3.38477	4.10359	1.00173	10359	Promoter (<=1kb)	48872421	48876058	3638	+	ENSG00000087074	ENST00000200453	0	PPP1R15A	protein phosphatase 1 regulatory subunit 15A [Source:HGNC Symbol;Acc:HGNC:14375]
19	48964894	48969528	4635	WT_un_S5_peak_4142a	550	20.6178	55.0859	50.3811	491	Promoter (<=1kb)	48965309	48966879	1571	+	ENSG00000087086	ENST00000331825	0	FTL	ferritin light chain [Source:HGNC Symbol;Acc:HGNC:3999]
19	48964894	48969528	4635	WT_un_S5_peak_4142b	29	2.84256	2.9599	0.06978	1630	Promoter (<=1kb)	48965309	48966879	1571	+	ENSG00000087086	ENST00000331825	0	FTL	ferritin light chain [Source:HGNC Symbol;Acc:HGNC:3999]
19	48964894	48969528	4635	WT_un_S5_peak_4142c	162	8.7886	16.2062	12.2944	2849	Promoter (<=1kb)	48965309	48966879	1571	+	ENSG00000087086	ENST00000331825	0	FTL	ferritin light chain [Source:HGNC Symbol;Acc:HGNC:3999]
19	48964894	48969528	4635	WT_un_S5_peak_4142d	168	8.18002	16.8733	12.9372	3237	Promoter (<=1kb)	48965309	48966879	1571	+	ENSG00000087086	ENST00000331825	0	FTL	ferritin light chain [Source:HGNC Symbol;Acc:HGNC:3999]
19	48964894	48969528	4635	WT_un_S5_peak_4142e	52	3.13211	5.2663	2.01803	3602	Promoter (<=1kb)	48965309	48966879	1571	+	ENSG00000087086	ENST00000331825	0	FTL	ferritin light chain [Source:HGNC Symbol;Acc:HGNC:3999]
19	48964894	48969528	4635	WT_un_S5_peak_4142f	35	3.01827	3.58391	0.57128	4094	Promoter (<=1kb)	48965309	48966879	1571	+	ENSG00000087086	ENST00000331825	0	FTL	ferritin light chain [Source:HGNC Symbol;Acc:HGNC:3999]
19	48964894	48969528	4635	WT_un_S5_peak_4142g	41	3.15842	4.14638	1.04025	4542	Promoter (<=1kb)	48965309	48966879	1571	+	ENSG00000087086	ENST00000331825	0	FTL	ferritin light chain [Source:HGNC Symbol;Acc:HGNC:3999]
7	100874776	100875501	726	WT_un_S5_peak_7616a	25	2.253	2.54672	0	196	Promoter (<=1kb)	100875103	100888664	13562	+	ENSG00000087087	ENST00000611405	0	SRRT	serrate, RNA effector molecule [Source:HGNC Symbol;Acc:HGNC:24101]
7	100874776	100875501	726	WT_un_S5_peak_7616b	99	6.06758	9.95453	6.32637	476	Promoter (<=1kb)	100875103	100888664	13562	+	ENSG00000087087	ENST00000611405	0	SRRT	serrate, RNA effector molecule [Source:HGNC Symbol;Acc:HGNC:24101]
17	44192075	44192799	725	WT_un_S5_peak_3418	40	3.5795	4.07966	0.98433	141	Promoter (2-3kb)	44194371	44195293	923	-	ENSG00000087152	ENST00000586688	2494	ATXN7L3	ataxin 7 like 3 [Source:HGNC Symbol;Acc:HGNC:25416]
17	44193295	44193890	596	WT_un_S5_peak_3419	24	2.553	2.43654	0	113	Promoter (1-2kb)	44194371	44195293	923	-	ENSG00000087152	ENST00000586688	1403	ATXN7L3	ataxin 7 like 3 [Source:HGNC Symbol;Acc:HGNC:25416]
17	63826826	63827772	947	WT_un_S5_peak_3547a	56	4.70604	5.60575	2.31853	211	Promoter (<=1kb)	63827152	63830917	3766	+	ENSG00000087191	ENST00000579708	0	PSMC5	proteasome 26S subunit, ATPase 5 [Source:HGNC Symbol;Acc:HGNC:9552]
17	63826826	63827772	947	WT_un_S5_peak_3547b	75	4.89556	7.53305	4.06575	658	Promoter (<=1kb)	63827152	63830917	3766	+	ENSG00000087191	ENST00000579708	0	PSMC5	proteasome 26S subunit, ATPase 5 [Source:HGNC Symbol;Acc:HGNC:9552]
5	177022431	177022869	439	WT_un_S5_peak_6815	36	3.07067	3.62443	0.59626	227	Promoter (<=1kb)	176969283	177022602	53320	-	ENSG00000087206	ENST00000509236	0	UIMC1	ubiquitin interaction motif containing 1 [Source:HGNC Symbol;Acc:HGNC:30298]
16	55489452	55490075	624	WT_un_S5_peak_3126	23	2.78918	2.30424	0	131	Promoter (<=1kb)	55488662	55502889	14228	+	ENSG00000087245	ENST00000570283	790	MMP2	matrix metallopeptidase 2 [Source:HGNC Symbol;Acc:HGNC:7166]
16	55509029	55509647	619	WT_un_S5_peak_3127	50	4.33228	5.08882	1.85064	168	Promoter (<=1kb)	55509072	55526058	16987	+	ENSG00000087253	ENST00000566911	0	LPCAT2	lysophosphatidylcholine acyltransferase 2 [Source:HGNC Symbol;Acc:HGNC:26032]
16	56219283	56219551	269	WT_un_S5_peak_3131	23	2.78918	2.30424	0	74	Intron (ENST00000675160/ENSG00000087258, intron 2 of 3)	56226379	56334775	108397	+	ENSG00000087258	ENST00000563440	-6828	GNAO1	G protein subunit alpha o1 [Source:HGNC Symbol;Acc:HGNC:4389]
14	50312182	50312938	757	WT_un_S5_peak_2582	50	3.755	5.08049	1.8432	209	Promoter (<=1kb)	50242434	50312229	69796	-	ENSG00000087299	ENST00000267436	0	L2HGDH	L-2-hydroxyglutarate dehydrogenase [Source:HGNC Symbol;Acc:HGNC:20499]
14	51989337	51989645	309	WT_un_S5_peak_2598	36	3.07067	3.62443	0.59626	204	Promoter (<=1kb)	51989514	52001866	12353	+	ENSG00000087302	ENST00000557553	0	RTRAF	RNA transcription, translation and transport factor [Source:HGNC Symbol;Acc:HGNC:23169]
20	58888895	58889482	588	WT_un_S5_peak_5021	364	10.7225	36.4831	32.0904	344	Promoter (<=1kb)	58889100	58911192	22093	+	ENSG00000087460	ENST00000477931	0	GNAS	GNAS complex locus [Source:HGNC Symbol;Acc:HGNC:4392]
20	58895950	58896226	277	WT_un_S5_peak_5022	43	4.15497	4.39973	1.26294	132	Promoter (<=1kb)	58895197	58911192	15996	+	ENSG00000087460	ENST00000487862	753	GNAS	GNAS complex locus [Source:HGNC Symbol;Acc:HGNC:4392]
20	58899277	58899560	284	WT_un_S5_peak_5023	23	2.78918	2.30424	0	239	Promoter (1-2kb)	58897440	58911192	13753	+	ENSG00000087460	ENST00000496934	1837	GNAS	GNAS complex locus [Source:HGNC Symbol;Acc:HGNC:4392]
12	32679088	32679785	698	WT_un_S5_peak_1947	102	5.808	10.2513	6.60447	226	Promoter (<=1kb)	32679200	32745552	66353	+	ENSG00000087470	ENST00000452533	0	DNM1L	dynamin 1 like [Source:HGNC Symbol;Acc:HGNC:2973]
12	28015920	28016203	284	WT_un_S5_peak_1937	35	3.46081	3.53919	0.53357	152	Distal Intergenic	27958084	27972733	14650	-	ENSG00000087494	ENST00000545234	-43187	PTHLH	parathyroid hormone like hormone [Source:HGNC Symbol;Acc:HGNC:9607]
12	29380467	29381355	889	WT_un_S5_peak_1939	44	3.82659	4.45165	1.28046	249	Promoter (<=1kb)	29337352	29381172	43821	-	ENSG00000087502	ENST00000360150	0	ERGIC2	ERGIC and golgi 2 [Source:HGNC Symbol;Acc:HGNC:30208]
20	56391935	56392322	388	WT_un_S5_peak_5014	46	3.99126	4.60285	1.42296	180	Promoter (<=1kb)	56369389	56392295	22907	-	ENSG00000087586	ENST00000395914	0	AURKA	aurora kinase A [Source:HGNC Symbol;Acc:HGNC:11393]
11	77821058	77821360	303	WT_un_S5_peak_1633	35	2.81625	3.53412	0.53357	117	Promoter (<=1kb)	77821109	77918432	97324	+	ENSG00000087884	ENST00000532481	0	AAMDC	adipogenesis associated Mth938 domain containing [Source:HGNC Symbol;Acc:HGNC:30205]
17	62423626	62424166	541	WT_un_S5_peak_3541	58	4.22446	5.88582	2.57002	183	Promoter (<=1kb)	62423875	62448914	25040	+	ENSG00000087995	ENST00000333483	0	METTL2A	methyltransferase like 2A [Source:HGNC Symbol;Acc:HGNC:25755]
1	63367541	63367906	366	WT_un_S5_peak_290	41	2.80047	4.11731	1.01378	185	Promoter (<=1kb)	63367575	63437126	69552	+	ENSG00000088035	ENST00000647818	0	ALG6	ALG6 alpha-1,3-glucosyltransferase [Source:HGNC Symbol;Acc:HGNC:23157]
2	117814583	117815028	446	WT_un_S5_peak_4529	86	6.02131	8.60744	5.05654	190	Promoter (<=1kb)	117814691	117832377	17687	+	ENSG00000088205	ENST00000263239	0	DDX18	DEAD-box helicase 18 [Source:HGNC Symbol;Acc:HGNC:2741]
13	94549742	94550010	269	WT_un_S5_peak_2458	26	3.09502	2.69119	0	201	Distal Intergenic	94579286	94581189	1904	-	ENSG00000088451	ENST00000470480	31179	TGDS	TDP-glucose 4,6-dehydratase [Source:HGNC Symbol;Acc:HGNC:20324]
3	47281518	47282064	547	WT_un_S5_peak_5489	48	3.60469	4.8397	1.64003	158	Promoter (<=1kb)	47275252	47282198	6947	-	ENSG00000088727	ENST00000425452	134	KIF9	kinesin family member 9 [Source:HGNC Symbol;Acc:HGNC:16666]
3	47282307	47283122	816	WT_un_S5_peak_5490a	133	6.66007	13.3063	9.50847	213	Promoter (<=1kb)	47227998	47282799	54802	-	ENSG00000088727	ENST00000684063	0	KIF9	kinesin family member 9 [Source:HGNC Symbol;Acc:HGNC:16666]
3	47282307	47283122	816	WT_un_S5_peak_5490b	120	6.08479	12.0554	8.32024	511	Promoter (<=1kb)	47227998	47282799	54802	-	ENSG00000088727	ENST00000684063	0	KIF9	kinesin family member 9 [Source:HGNC Symbol;Acc:HGNC:16666]
20	6005733	6006407	675	WT_un_S5_peak_4827	116	6.51844	11.6317	7.91458	429	Promoter (<=1kb)	6006093	6040043	33951	+	ENSG00000088766	ENST00000452938	0	CRLS1	cardiolipin synthase 1 [Source:HGNC Symbol;Acc:HGNC:16148]
20	1392860	1393264	405	WT_un_S5_peak_4799	23	2.38633	2.34354	0	126	Promoter (<=1kb)	1368977	1393038	24062	-	ENSG00000088832	ENST00000677937	0	FKBP1A	FKBP prolyl isomerase 1A [Source:HGNC Symbol;Acc:HGNC:3711]
20	1417208	1417480	273	WT_un_S5_peak_4800	36	3.07067	3.62443	0.59626	190	Distal Intergenic	1373708	1393164	19457	-	ENSG00000088832	ENST00000677533	-24044	FKBP1A	FKBP prolyl isomerase 1A [Source:HGNC Symbol;Acc:HGNC:3711]
20	1466335	1466941	607	WT_un_S5_peak_4801	40	3.63653	4.09083	0.99096	434	Promoter (<=1kb)	1442162	1466828	24667	-	ENSG00000088833	ENST00000353088	0	NSFL1C	NSFL1 cofactor [Source:HGNC Symbol;Acc:HGNC:15912]
20	2524626	2524944	319	WT_un_S5_peak_4811	60	4.67282	6.0379	2.6982	153	Promoter (<=1kb)	2484527	2524702	40176	-	ENSG00000088876	ENST00000445484	0	ZNF343	zinc finger protein 343 [Source:HGNC Symbol;Acc:HGNC:16017]
20	21302943	21304227	1285	WT_un_S5_peak_4869a	163	7.861	16.3197	12.3984	432	Promoter (<=1kb)	21303331	21389825	86495	+	ENSG00000088930	ENST00000377191	0	XRN2	5'-3' exoribonuclease 2 [Source:HGNC Symbol;Acc:HGNC:12836]
20	21302943	21304227	1285	WT_un_S5_peak_4869b	24	2.47408	2.41987	0	1132	Promoter (<=1kb)	21303331	21389825	86495	+	ENSG00000088930	ENST00000377191	0	XRN2	5'-3' exoribonuclease 2 [Source:HGNC Symbol;Acc:HGNC:12836]
12	120495951	120496501	551	WT_un_S5_peak_2279	130	7.63485	13.09	9.30507	207	Promoter (<=1kb)	120496082	120496896	815	+	ENSG00000088986	ENST00000548214	0	DYNLL1	dynein light chain LC8-type 1 [Source:HGNC Symbol;Acc:HGNC:15476]
20	17959677	17960111	435	WT_un_S5_peak_4857	56	4.41082	5.65136	2.36274	212	Promoter (1-2kb)	17941597	17961995	20399	-	ENSG00000089006	ENST00000483485	1884	SNX5	sorting nexin 5 [Source:HGNC Symbol;Acc:HGNC:14969]
20	17968174	17970176	2003	WT_un_S5_peak_4861b	40	3.5402	4.02122	0.94915	1831	Promoter (<=1kb)	17941597	17968800	27204	-	ENSG00000089006	ENST00000490175	0	SNX5	sorting nexin 5 [Source:HGNC Symbol;Acc:HGNC:14969]
20	17968174	17970176	2003	WT_un_S5_peak_4861a	304	14.3266	30.4754	26.1939	632	Promoter (<=1kb)	17941597	17968800	27204	-	ENSG00000089006	ENST00000490175	0	SNX5	sorting nexin 5 [Source:HGNC Symbol;Acc:HGNC:14969]
12	112404238	112404575	338	WT_un_S5_peak_2254	41	3.67252	4.15481	1.04737	192	Promoter (1-2kb)	112405190	112406344	1155	-	ENSG00000089009	ENST00000553205	1769	RPL6	ribosomal protein L6 [Source:HGNC Symbol;Acc:HGNC:10362]
12	112409087	112409816	730	WT_un_S5_peak_2255	262	11.7404	26.2065	22.0123	461	Promoter (<=1kb)	112405189	112409605	4417	-	ENSG00000089009	ENST00000202773	0	RPL6	ribosomal protein L6 [Source:HGNC Symbol;Acc:HGNC:10362]
12	112418566	112419679	1114	WT_un_S5_peak_2256	224	8.29092	22.4566	18.3576	268	Promoter (<=1kb)	112406866	112418838	11973	-	ENSG00000089009	ENST00000551291	0	RPL6	ribosomal protein L6 [Source:HGNC Symbol;Acc:HGNC:10362]
20	13784786	13785331	546	WT_un_S5_peak_4847	44	4.19238	4.45165	1.28046	188	Promoter (<=1kb)	13714322	13784886	70565	-	ENSG00000089048	ENST00000202816	0	ESF1	ESF1 nucleolar pre-rRNA processing protein homolog [Source:HGNC Symbol;Acc:HGNC:15898]
12	121352223	121352812	590	WT_un_S5_peak_2280	97	5.9414	9.75164	6.1326	198	Promoter (<=1kb)	121308245	121352411	44167	-	ENSG00000089053	ENST00000261819	0	ANAPC5	anaphase promoting complex subunit 5 [Source:HGNC Symbol;Acc:HGNC:15713]
12	121399696	121400424	729	WT_un_S5_peak_2281	126	7.11601	12.6085	8.84111	479	Promoter (<=1kb)	121345999	121399896	53898	-	ENSG00000089053	ENST00000536837	0	ANAPC5	anaphase promoting complex subunit 5 [Source:HGNC Symbol;Acc:HGNC:15713]
20	5112851	5114034	1184	WT_un_S5_peak_4824a	76	5.38749	7.67276	4.19448	373	Promoter (<=1kb)	5068483	5113087	44605	-	ENSG00000089063	ENST00000612323	0	TMEM230	transmembrane protein 230 [Source:HGNC Symbol;Acc:HGNC:15876]
20	5112851	5114034	1184	WT_un_S5_peak_4824b	28	3.00051	2.85297	0	1014	Promoter (<=1kb)	5068483	5113087	44605	-	ENSG00000089063	ENST00000612323	0	TMEM230	transmembrane protein 230 [Source:HGNC Symbol;Acc:HGNC:15876]
20	18466609	18467600	992	WT_un_S5_peak_4863a	44	3.86545	4.42632	1.28046	153	Promoter (<=1kb)	18383367	18467030	83664	-	ENSG00000089091	ENST00000377630	0	DZANK1	double zinc ribbon and ankyrin repeat domains 1 [Source:HGNC Symbol;Acc:HGNC:15858]
20	18466609	18467600	992	WT_un_S5_peak_4863b	49	3.96607	4.99232	1.77076	444	Promoter (<=1kb)	18383367	18467030	83664	-	ENSG00000089091	ENST00000377630	0	DZANK1	double zinc ribbon and ankyrin repeat domains 1 [Source:HGNC Symbol;Acc:HGNC:15858]
20	18466609	18467600	992	WT_un_S5_peak_4863c	43	3.52689	4.33257	1.20064	834	Promoter (<=1kb)	18383367	18467030	83664	-	ENSG00000089091	ENST00000377630	0	DZANK1	double zinc ribbon and ankyrin repeat domains 1 [Source:HGNC Symbol;Acc:HGNC:15858]
12	113555424	113555809	386	WT_un_S5_peak_2259	39	3.8277	3.95231	0.88518	139	Distal Intergenic	113471483	113472280	798	-	ENSG00000089116	ENST00000557836	-83144	LHX5	LIM homeobox 5 [Source:HGNC Symbol;Acc:HGNC:14216]
20	13638617	13639050	434	WT_un_S5_peak_4846	62	4.78655	6.20573	2.85569	186	Promoter (<=1kb)	13389392	13638903	249512	-	ENSG00000089123	ENST00000480436	0	TASP1	taspase 1 [Source:HGNC Symbol;Acc:HGNC:15859]
12	120194488	120195114	627	WT_un_S5_peak_2274	102	5.808	10.2513	6.60447	235	Promoter (<=1kb)	120127202	120194715	67514	-	ENSG00000089154	ENST00000300648	0	GCN1	GCN1 activator of EIF2AK4 [Source:HGNC Symbol;Acc:HGNC:4199]
12	120200754	120201392	639	WT_un_S5_peak_2275	529	18.7768	52.9432	48.2753	332	Promoter (<=1kb)	120196699	120201099	4401	-	ENSG00000089157	ENST00000551150	0	RPLP0	ribosomal protein lateral stalk subunit P0 [Source:HGNC Symbol;Acc:HGNC:10371]
20	5950385	5950850	466	WT_un_S5_peak_4826	36	3.29878	3.62443	0.59626	200	Promoter (<=1kb)	5937228	5950533	13306	-	ENSG00000089195	ENST00000203001	0	TRMT6	tRNA methyltransferase 6 [Source:HGNC Symbol;Acc:HGNC:20900]
12	111685882	111686275	394	WT_un_S5_peak_2250	50	4.00646	5.05247	1.82837	138	Promoter (<=1kb)	111642146	111685956	43811	-	ENSG00000089234	ENST00000419234	0	BRAP	BRCA1 associated protein [Source:HGNC Symbol;Acc:HGNC:1099]
12	112012873	112013350	478	WT_un_S5_peak_2252	58	4.21122	5.86499	2.55229	200	Promoter (<=1kb)	112013348	112023220	9873	+	ENSG00000089248	ENST00000455836	0	ERP29	endoplasmic reticulum protein 29 [Source:HGNC Symbol;Acc:HGNC:13799]
16	31179513	31181505	1993	WT_un_S5_peak_3101a	838	29.3385	83.8087	78.7038	654	Promoter (<=1kb)	31180138	31191602	11465	+	ENSG00000089280	ENST00000566605	0	FUS	FUS RNA binding protein [Source:HGNC Symbol;Acc:HGNC:4010]
16	31179513	31181505	1993	WT_un_S5_peak_3101b	31	3.15976	3.11909	0.2036	1599	Promoter (<=1kb)	31180138	31191602	11465	+	ENSG00000089280	ENST00000566605	0	FUS	FUS RNA binding protein [Source:HGNC Symbol;Acc:HGNC:4010]
16	31188572	31188840	269	WT_un_S5_peak_3106	35	3.46081	3.53919	0.53357	146	Promoter (<=1kb)	31188467	31189695	1229	+	ENSG00000089280	ENST00000564766	105	FUS	FUS RNA binding protein [Source:HGNC Symbol;Acc:HGNC:4010]
16	31183942	31184222	281	WT_un_S5_peak_3103	32	3.23733	3.22608	0.28631	189	Promoter (<=1kb)	31183550	31184398	849	+	ENSG00000089280	ENST00000487974	392	FUS	FUS RNA binding protein [Source:HGNC Symbol;Acc:HGNC:4010]
16	31186246	31186757	512	WT_un_S5_peak_3104	35	3.46081	3.53919	0.53357	110	Promoter (<=1kb)	31185499	31191102	5604	+	ENSG00000089280	ENST00000474990	747	FUS	FUS RNA binding protein [Source:HGNC Symbol;Acc:HGNC:4010]
16	31187619	31188322	704	WT_un_S5_peak_3105	59	4.606	5.94877	2.6174	165	Promoter (<=1kb)	31188152	31190120	1969	+	ENSG00000089280	ENST00000568901	0	FUS	FUS RNA binding protein [Source:HGNC Symbol;Acc:HGNC:4010]
16	31189176	31189444	269	WT_un_S5_peak_3107	24	2.89517	2.43654	0	131	Promoter (<=1kb)	31188467	31189695	1229	+	ENSG00000089280	ENST00000564766	709	FUS	FUS RNA binding protein [Source:HGNC Symbol;Acc:HGNC:4010]
16	31190033	31190755	723	WT_un_S5_peak_3108	54	4.55817	5.42044	2.14934	256	Promoter (<=1kb)	31190216	31191605	1390	+	ENSG00000089280	ENST00000569760	0	FUS	FUS RNA binding protein [Source:HGNC Symbol;Acc:HGNC:4010]
16	31191596	31192476	881	WT_un_S5_peak_3109	44	4.19238	4.45165	1.28046	199	Promoter (1-2kb)	31190373	31191558	1186	+	ENSG00000089280	ENST00000483853	1223	FUS	FUS RNA binding protein [Source:HGNC Symbol;Acc:HGNC:4010]
X	70133284	70133648	365	WT_un_S5_peak_8641	44	3.82659	4.45165	1.28046	162	Promoter (<=1kb)	70133447	70166324	32878	+	ENSG00000089289	ENST00000356413	0	IGBP1	immunoglobulin binding protein 1 [Source:HGNC Symbol;Acc:HGNC:5461]
X	70133823	70134115	293	WT_un_S5_peak_8642	44	4.19238	4.45165	1.28046	151	Promoter (<=1kb)	70133449	70166324	32876	+	ENSG00000089289	ENST00000342206	374	IGBP1	immunoglobulin binding protein 1 [Source:HGNC Symbol;Acc:HGNC:5461]
19	35154919	35155338	420	WT_un_S5_peak_4001	53	4.21872	5.36092	2.10295	253	Promoter (<=1kb)	35154942	35169879	14938	+	ENSG00000089327	ENST00000423817	0	FXYD5	FXYD domain containing ion transport regulator 5 [Source:HGNC Symbol;Acc:HGNC:4029]
11	62646430	62646814	385	WT_un_S5_peak_1490	41	3.15842	4.14638	1.04025	154	Promoter (<=1kb)	62624826	62646602	21777	-	ENSG00000089597	ENST00000532402	0	GANAB	glucosidase II alpha subunit [Source:HGNC Symbol;Acc:HGNC:4138]
14	94080869	94081432	564	WT_un_S5_peak_2726	64	5.28974	6.43923	3.05901	286	Promoter (<=1kb)	94048287	94081202	32916	-	ENSG00000089737	ENST00000621632	0	DDX24	DEAD-box helicase 24 [Source:HGNC Symbol;Acc:HGNC:13266]
14	64503615	64504013	399	WT_un_S5_peak_2637	23	2.38633	2.34354	0	209	Promoter (<=1kb)	64478051	64503838	25788	-	ENSG00000089775	ENST00000608382	0	ZBTB25	zinc finger and BTB domain containing 25 [Source:HGNC Symbol;Acc:HGNC:13112]
14	64504223	64505102	880	WT_un_S5_peak_2638	86	5.67932	8.66147	5.1071	659	Promoter (<=1kb)	64486839	64504584	17746	-	ENSG00000089775	ENST00000394715	0	ZBTB25	zinc finger and BTB domain containing 25 [Source:HGNC Symbol;Acc:HGNC:13112]
12	8081857	8082379	523	WT_un_S5_peak_1883	75	5.65553	7.50295	4.04628	330	Promoter (<=1kb)	8081895	8097740	15846	+	ENSG00000089818	ENST00000640648	0	NECAP1	NECAP endocytosis associated 1 [Source:HGNC Symbol;Acc:HGNC:24539]
X	153927965	153928446	482	WT_un_S5_peak_8708	36	3.29878	3.62443	0.59626	221	Promoter (<=1kb)	153920708	153928419	7712	-	ENSG00000089820	ENST00000442262	0	ARHGAP4	Rho GTPase activating protein 4 [Source:HGNC Symbol;Acc:HGNC:674]
14	76151861	76152308	448	WT_un_S5_peak_2686	75	5.65553	7.50295	4.04628	211	Promoter (<=1kb)	76151916	76202007	50092	+	ENSG00000089916	ENST00000554375	0	GPATCH2L	G-patch domain containing 2 like [Source:HGNC Symbol;Acc:HGNC:20210]
1	27154520	27155393	874	WT_un_S5_peak_132	474	16.3011	47.495	42.9055	585	Promoter (<=1kb)	27098809	27155125	56317	-	ENSG00000090020	ENST00000263980	0	SLC9A1	solute carrier family 9 member A1 [Source:HGNC Symbol;Acc:HGNC:11071]
14	99481231	99481638	408	WT_un_S5_peak_2731	68	4.83308	6.82947	3.41799	148	Promoter (<=1kb)	99481409	99512440	31032	+	ENSG00000090061	ENST00000389879	0	CCNK	cyclin K [Source:HGNC Symbol;Acc:HGNC:1596]
1	192559666	192559970	305	WT_un_S5_peak_718	35	3.46081	3.53919	0.53357	114	Intron (ENST00000642855/ENSG00000285280, intron 4 of 7)	192575763	192577276	1514	+	ENSG00000090104	ENST00000474373	-15793	RGS1	regulator of G protein signaling 1 [Source:HGNC Symbol;Acc:HGNC:9991]
7	141014603	141014964	362	WT_un_S5_peak_7715	64	5.28974	6.43923	3.05901	209	Promoter (<=1kb)	141002610	141014952	12343	-	ENSG00000090263	ENST00000324787	0	MRPS33	mitochondrial ribosomal protein S33 [Source:HGNC Symbol;Acc:HGNC:16634]
7	140696577	140696897	321	WT_un_S5_peak_7714	50	4.0206	5.06236	1.83706	153	Promoter (<=1kb)	140696671	140722790	26120	+	ENSG00000090266	ENST00000476279	0	NDUFB2	NADH:ubiquinone oxidoreductase subunit B2 [Source:HGNC Symbol;Acc:HGNC:7697]
1	26900092	26900392	301	WT_un_S5_peak_129	35	3.02588	3.5556	0.54929	146	Promoter (<=1kb)	26900238	26942776	42539	+	ENSG00000090273	ENST00000435827	0	NUDC	nuclear distribution C, dynein complex regulator [Source:HGNC Symbol;Acc:HGNC:8045]
1	26921578	26922110	533	WT_un_S5_peak_130	47	3.0742	4.70046	1.51522	213	Promoter (<=1kb)	26921743	26946871	25129	+	ENSG00000090273	ENST00000321265	0	NUDC	nuclear distribution C, dynein complex regulator [Source:HGNC Symbol;Acc:HGNC:8045]
4	1289578	1289934	357	WT_un_S5_peak_5955	35	2.84542	3.58391	0.57128	141	Promoter (<=1kb)	1289887	1339177	49291	+	ENSG00000090316	ENST00000505177	0	MAEA	macrophage erythroblast attacher, E3 ubiquitin ligase [Source:HGNC Symbol;Acc:HGNC:13731]
1	20507866	20508343	478	WT_un_S5_peak_82	26	2.57945	2.62291	0	87	Promoter (<=1kb)	20499448	20508151	8704	-	ENSG00000090432	ENST00000264198	0	MUL1	mitochondrial E3 ubiquitin protein ligase 1 [Source:HGNC Symbol;Acc:HGNC:25762]
15	65133589	65134026	438	WT_un_S5_peak_2905	32	2.66438	3.27274	0.32844	165	Promoter (<=1kb)	65117379	65133808	16430	-	ENSG00000090470	ENST00000204549	0	PDCD7	programmed cell death 7 [Source:HGNC Symbol;Acc:HGNC:8767]
3	189937389	189937776	388	WT_un_S5_peak_5911	26	2.72923	2.69119	0	94	Distal Intergenic	189957697	189964121	6425	-	ENSG00000090530	ENST00000490940	26345	P3H2	prolyl 3-hydroxylase 2 [Source:HGNC Symbol;Acc:HGNC:19317]
3	190124364	190124632	269	WT_un_S5_peak_5912	31	3.15976	3.11909	0.2036	92	Promoter (1-2kb)	189956831	190122437	165607	-	ENSG00000090530	ENST00000427335	-1927	P3H2	prolyl 3-hydroxylase 2 [Source:HGNC Symbol;Acc:HGNC:19317]
1	39575427	39575700	274	WT_un_S5_peak_193	36	3.07067	3.62443	0.59626	132	Promoter (<=1kb)	39560709	39575686	14978	-	ENSG00000090621	ENST00000677006	0	PABPC4	poly(A) binding protein cytoplasmic 4 [Source:HGNC Symbol;Acc:HGNC:8557]
1	39576389	39577009	621	WT_un_S5_peak_194	215	7.31707	21.584	17.5012	332	Promoter (<=1kb)	39560816	39576744	15929	-	ENSG00000090621	ENST00000372857	0	PABPC4	poly(A) binding protein cytoplasmic 4 [Source:HGNC Symbol;Acc:HGNC:8557]
1	21783085	21783681	597	WT_un_S5_peak_84	157	7.41021	15.7961	11.8967	245	Promoter (<=1kb)	21678298	21783149	104852	-	ENSG00000090686	ENST00000308271	0	USP48	ubiquitin specific peptidase 48 [Source:HGNC Symbol;Acc:HGNC:18533]
X	68828674	68829094	421	WT_un_S5_peak_8640	64	4.92395	6.43923	3.05901	217	Promoter (<=1kb)	68829021	68842160	13140	+	ENSG00000090776	ENST00000204961	0	EFNB1	ephrin B1 [Source:HGNC Symbol;Acc:HGNC:3226]
16	70287464	70287967	504	WT_un_S5_peak_3170	27	2.47841	2.70016	0	84	Promoter (1-2kb)	70251983	70289317	37335	-	ENSG00000090861	ENST00000675643	1350	AARS1	alanyl-tRNA synthetase 1 [Source:HGNC Symbol;Acc:HGNC:20]
16	70288604	70289669	1066	WT_un_S5_peak_3171	350	10.9666	35.0067	30.64	805	Promoter (<=1kb)	70251983	70289317	37335	-	ENSG00000090861	ENST00000675643	0	AARS1	alanyl-tRNA synthetase 1 [Source:HGNC Symbol;Acc:HGNC:20]
X	70289722	70290122	401	WT_un_S5_peak_8643	24	2.553	2.43654	0	110	Promoter (<=1kb)	70290104	70420886	130783	+	ENSG00000090889	ENST00000374403	0	KIF4A	kinesin family member 4A [Source:HGNC Symbol;Acc:HGNC:13339]
19	39410919	39412743	1825	WT_un_S5_peak_4032a	47	3.8123	4.76266	1.57115	388	Promoter (<=1kb)	39412669	39428415	15747	+	ENSG00000090924	ENST00000425673	0	PLEKHG2	pleckstrin homology and RhoGEF domain containing G2 [Source:HGNC Symbol;Acc:HGNC:29515]
19	39410919	39412743	1825	WT_un_S5_peak_4032b	135	6.06683	13.5895	9.77746	1356	Promoter (<=1kb)	39412669	39428415	15747	+	ENSG00000090924	ENST00000425673	0	PLEKHG2	pleckstrin homology and RhoGEF domain containing G2 [Source:HGNC Symbol;Acc:HGNC:29515]
4	55853533	55854066	534	WT_un_S5_peak_6048	54	4.55817	5.42044	2.14934	223	Promoter (<=1kb)	55853648	55905086	51439	+	ENSG00000090989	ENST00000381295	0	EXOC1	exocyst complex component 1 [Source:HGNC Symbol;Acc:HGNC:30380]
12	76559512	76560013	502	WT_un_S5_peak_2155	66	4.43933	6.6833	3.28307	465	Promoter (<=1kb)	76351797	76559535	207739	-	ENSG00000091039	ENST00000393249	0	OSBPL8	oxysterol binding protein like 8 [Source:HGNC Symbol;Acc:HGNC:16396]
7	105522115	105522406	292	WT_un_S5_peak_7637	48	3.88381	4.85653	1.6543	159	Promoter (<=1kb)	105439661	105522267	82607	-	ENSG00000091127	ENST00000481939	0	PUS7	pseudouridine synthase 7 [Source:HGNC Symbol;Acc:HGNC:26033]
18	56651142	56651566	425	WT_un_S5_peak_3786	39	3.49373	3.95231	0.88518	216	Promoter (<=1kb)	56651343	57027313	375971	+	ENSG00000091157	ENST00000589935	0	WDR7	WD repeat domain 7 [Source:HGNC Symbol;Acc:HGNC:13490]
18	56638270	56639086	817	WT_un_S5_peak_3785	32	3.23733	3.22608	0.28631	200	Promoter (<=1kb)	56597209	56638592	41384	-	ENSG00000091164	ENST00000217515	0	TXNL1	thioredoxin like 1 [Source:HGNC Symbol;Acc:HGNC:12436]
2	173075862	173076239	378	WT_un_S5_peak_4611	27	2.68193	2.72885	0	166	Promoter (<=1kb)	173075868	173212825	136958	+	ENSG00000091436	ENST00000476618	0	MAP3K20	mitogen-activated protein kinase kinase kinase 20 [Source:HGNC Symbol;Acc:HGNC:17797]
1	241519453	241519946	494	WT_un_S5_peak_890	54	4.55817	5.42044	2.14934	242	Promoter (<=1kb)	241497511	241519694	22184	-	ENSG00000091483	ENST00000493477	0	FH	fumarate hydratase [Source:HGNC Symbol;Acc:HGNC:3700]
3	133573542	133573936	395	WT_un_S5_peak_5715	40	2.62055	4.06162	0.98433	273	Promoter (<=1kb)	133573686	133590261	16576	+	ENSG00000091527	ENST00000264993	0	CDV3	CDV3 homolog [Source:HGNC Symbol;Acc:HGNC:26928]
3	133574217	133574682	466	WT_un_S5_peak_5716	26	2.00692	2.6186	0	239	Promoter (<=1kb)	133574434	133588052	13619	+	ENSG00000091527	ENST00000508481	0	CDV3	CDV3 homolog [Source:HGNC Symbol;Acc:HGNC:26928]
17	4966412	4966810	399	WT_un_S5_peak_3244	27	2.68349	2.77321	0	89	Promoter (<=1kb)	4966238	4966749	512	-	ENSG00000091640	ENST00000570341	0	SPAG7	sperm associated antigen 7 [Source:HGNC Symbol;Acc:HGNC:11216]
17	4967469	4969279	1811	WT_un_S5_peak_3245a	130	7.5165	13.0515	9.26834	418	Promoter (<=1kb)	4959226	4967790	8565	-	ENSG00000091640	ENST00000575142	0	SPAG7	sperm associated antigen 7 [Source:HGNC Symbol;Acc:HGNC:11216]
17	4967469	4969279	1811	WT_un_S5_peak_3245b	29	2.84256	2.9599	0.06978	822	Promoter (<=1kb)	4959226	4967790	8565	-	ENSG00000091640	ENST00000575142	0	SPAG7	sperm associated antigen 7 [Source:HGNC Symbol;Acc:HGNC:11216]
17	4967469	4969279	1811	WT_un_S5_peak_3245c	33	3.34471	3.30737	0.35013	1170	Promoter (<=1kb)	4959226	4967790	8565	-	ENSG00000091640	ENST00000575142	0	SPAG7	sperm associated antigen 7 [Source:HGNC Symbol;Acc:HGNC:11216]
17	4967469	4969279	1811	WT_un_S5_peak_3245d	69	4.97505	6.98198	3.55461	1622	Promoter (<=1kb)	4959226	4967790	8565	-	ENSG00000091640	ENST00000575142	0	SPAG7	sperm associated antigen 7 [Source:HGNC Symbol;Acc:HGNC:11216]
16	46690001	46690335	335	WT_un_S5_peak_3119	39	3.49373	3.95231	0.88518	170	Promoter (<=1kb)	46689707	46695051	5345	+	ENSG00000091651	ENST00000570260	294	ORC6	origin recognition complex subunit 6 [Source:HGNC Symbol;Acc:HGNC:17151]
8	76874861	76875242	382	WT_un_S5_peak_7997	26	2.66688	2.60024	0	205	Distal Intergenic	76849800	76850945	1146	+	ENSG00000091656	ENST00000522409	25061	ZFHX4	zinc finger homeobox 4 [Source:HGNC Symbol;Acc:HGNC:30939]
7	130373892	130374160	269	WT_un_S5_peak_7676	24	2.553	2.43654	0	95	Distal Intergenic	130380339	130383482	3144	+	ENSG00000091704	ENST00000481342	-6179	CPA1	carboxypeptidase A1 [Source:HGNC Symbol;Acc:HGNC:2296]
3	112640575	112641527	953	WT_un_S5_peak_5671	172	9.67918	17.2452	13.2916	627	Promoter (<=1kb)	112596797	112641143	44347	-	ENSG00000091986	ENST00000206423	0	CCDC80	coiled-coil domain containing 80 [Source:HGNC Symbol;Acc:HGNC:30649]
14	35121678	35122641	964	WT_un_S5_peak_2568	47	4.10774	4.76379	1.57115	608	Promoter (<=1kb)	35085467	35122261	36795	-	ENSG00000092020	ENST00000553273	0	PPP2R3C	protein phosphatase 2 regulatory subunit B''gamma [Source:HGNC Symbol;Acc:HGNC:17485]
14	20455007	20455664	658	WT_un_S5_peak_2510	55	4.3619	5.57914	2.2942	345	Promoter (<=1kb)	20451959	20455089	3131	-	ENSG00000092094	ENST00000556439	0	OSGEP	O-sialoglycoprotein endopeptidase [Source:HGNC Symbol;Acc:HGNC:18028]
14	30622205	30622628	424	WT_un_S5_peak_2559	86	6.02131	8.60744	5.05654	224	Promoter (<=1kb)	30622291	30735809	113519	+	ENSG00000092108	ENST00000678760	0	SCFD1	sec1 family domain containing 1 [Source:HGNC Symbol;Acc:HGNC:20726]
14	30558923	30559191	269	WT_un_S5_peak_2558	26	3.09502	2.69119	0	243	Promoter (<=1kb)	30559158	30592447	33290	+	ENSG00000092140	ENST00000550944	0	G2E3	G2/M-phase specific E3 ubiquitin protein ligase [Source:HGNC Symbol;Acc:HGNC:20338]
14	21252890	21253255	366	WT_un_S5_peak_2521	26	2.82589	2.66609	0	139	Intron (ENST00000336053/ENSG00000092199, intron 1 of 6)	21210966	21262677	51712	-	ENSG00000092199	ENST00000556897	9422	HNRNPC	heterogeneous nuclear ribonucleoprotein C [Source:HGNC Symbol;Acc:HGNC:5035]
14	21256905	21257263	359	WT_un_S5_peak_2522	40	3.63653	4.09083	0.99096	208	Intron (ENST00000336053/ENSG00000092199, intron 1 of 6)	21210966	21262677	51712	-	ENSG00000092199	ENST00000556897	5414	HNRNPC	heterogeneous nuclear ribonucleoprotein C [Source:HGNC Symbol;Acc:HGNC:5035]
14	21257524	21257844	321	WT_un_S5_peak_2523	42	3.72192	4.21222	1.09996	170	Intron (ENST00000336053/ENSG00000092199, intron 1 of 6)	21210966	21262677	51712	-	ENSG00000092199	ENST00000556897	4833	HNRNPC	heterogeneous nuclear ribonucleoprotein C [Source:HGNC Symbol;Acc:HGNC:5035]
14	21258554	21259149	596	WT_un_S5_peak_2524	35	3.23863	3.57756	0.56548	248	Intron (ENST00000336053/ENSG00000092199, intron 1 of 6)	21210966	21262677	51712	-	ENSG00000092199	ENST00000556897	3528	HNRNPC	heterogeneous nuclear ribonucleoprotein C [Source:HGNC Symbol;Acc:HGNC:5035]
14	21261274	21261817	544	WT_un_S5_peak_2525	39	3.49373	3.95231	0.88518	195	Promoter (<=1kb)	21210966	21262677	51712	-	ENSG00000092199	ENST00000556897	860	HNRNPC	heterogeneous nuclear ribonucleoprotein C [Source:HGNC Symbol;Acc:HGNC:5035]
14	21263883	21264180	298	WT_un_S5_peak_2526	41	3.63696	4.16545	1.05527	162	Promoter (1-2kb)	21210966	21262677	51712	-	ENSG00000092199	ENST00000556897	-1206	HNRNPC	heterogeneous nuclear ribonucleoprotein C [Source:HGNC Symbol;Acc:HGNC:5035]
14	21265924	21266343	420	WT_un_S5_peak_2527	29	2.84256	2.9599	0.06978	104	Promoter (<=1kb)	21210556	21265516	54961	-	ENSG00000092199	ENST00000430246	-408	HNRNPC	heterogeneous nuclear ribonucleoprotein C [Source:HGNC Symbol;Acc:HGNC:5035]
14	21269064	21269844	781	WT_un_S5_peak_2528	273	11.431	27.3248	23.1087	362	Promoter (<=1kb)	21209136	21269494	60359	-	ENSG00000092199	ENST00000336053	0	HNRNPC	heterogeneous nuclear ribonucleoprotein C [Source:HGNC Symbol;Acc:HGNC:5035]
14	21383638	21384196	559	WT_un_S5_peak_2529	39	3.51555	3.919	0.85551	180	Promoter (<=1kb)	21351476	21384019	32544	-	ENSG00000092201	ENST00000216297	0	SUPT16H	SPT16 homolog, facilitates chromatin remodeling subunit [Source:HGNC Symbol;Acc:HGNC:11465]
14	21477215	21477521	307	WT_un_S5_peak_2530	53	4.21872	5.36092	2.10295	157	Promoter (<=1kb)	21477218	21499171	21954	+	ENSG00000092203	ENST00000673643	0	TOX4	TOX high mobility group box family member 4 [Source:HGNC Symbol;Acc:HGNC:20161]
14	24242125	24243215	1091	WT_un_S5_peak_2549a	48	3.88381	4.85653	1.6543	133	Promoter (<=1kb)	24239643	24242623	2981	-	ENSG00000092330	ENST00000267415	0	TINF2	TERF1 interacting nuclear factor 2 [Source:HGNC Symbol;Acc:HGNC:11824]
14	24242125	24243215	1091	WT_un_S5_peak_2549b	66	4.74936	6.63423	3.24457	568	Promoter (<=1kb)	24239643	24242623	2981	-	ENSG00000092330	ENST00000267415	0	TINF2	TERF1 interacting nuclear factor 2 [Source:HGNC Symbol;Acc:HGNC:11824]
15	43826292	43827280	989	WT_un_S5_peak_2832	74	5.61054	7.46621	4.01975	779	Promoter (<=1kb)	43826980	43867018	40039	+	ENSG00000092470	ENST00000381246	0	WDR76	WD repeat domain 76 [Source:HGNC Symbol;Acc:HGNC:25773]
15	42490837	42491838	1002	WT_un_S5_peak_2820a	116	7.12709	11.6381	7.92039	241	Promoter (<=1kb)	42491233	42513442	22210	+	ENSG00000092531	ENST00000568745	0	SNAP23	synaptosome associated protein 23 [Source:HGNC Symbol;Acc:HGNC:11131]
15	42490837	42491838	1002	WT_un_S5_peak_2820b	77	5.8315	7.78835	4.29985	591	Promoter (<=1kb)	42491233	42513442	22210	+	ENSG00000092531	ENST00000568745	0	SNAP23	synaptosome associated protein 23 [Source:HGNC Symbol;Acc:HGNC:11131]
15	42495478	42495812	335	WT_un_S5_peak_2821	75	5.35689	7.5707	4.10102	167	Promoter (<=1kb)	42495634	42505688	10055	+	ENSG00000092531	ENST00000566141	0	SNAP23	synaptosome associated protein 23 [Source:HGNC Symbol;Acc:HGNC:11131]
1	119648315	119648593	279	WT_un_S5_peak_488	25	2.76105	2.57922	0	130	Promoter (<=1kb)	119648411	119744190	95780	+	ENSG00000092621	ENST00000641597	0	PHGDH	phosphoglycerate dehydrogenase [Source:HGNC Symbol;Acc:HGNC:8923]
1	119711877	119712487	611	WT_un_S5_peak_489	77	5.49754	7.78835	4.29985	170	Promoter (<=1kb)	119711884	119727063	15180	+	ENSG00000092621	ENST00000642041	0	PHGDH	phosphoglycerate dehydrogenase [Source:HGNC Symbol;Acc:HGNC:8923]
1	119744751	119745019	269	WT_un_S5_peak_490	34	3.42992	3.49544	0.52126	120	Downstream (2-3kb)	119739462	119744213	4752	+	ENSG00000092621	ENST00000482968	5289	PHGDH	phosphoglycerate dehydrogenase [Source:HGNC Symbol;Acc:HGNC:8923]
6	158814024	158819629	5606	WT_un_S5_peak_7387a	40	3.92167	4.07966	0.98433	465	Promoter (<=1kb)	158765741	158818227	52487	-	ENSG00000092820	ENST00000337147	0	EZR	ezrin [Source:HGNC Symbol;Acc:HGNC:12691]
6	158814024	158819629	5606	WT_un_S5_peak_7387b	40	3.92167	4.07966	0.98433	1781	Promoter (<=1kb)	158765741	158818227	52487	-	ENSG00000092820	ENST00000337147	0	EZR	ezrin [Source:HGNC Symbol;Acc:HGNC:12691]
6	158814024	158819629	5606	WT_un_S5_peak_7387c	53	4.51749	5.36032	2.10295	2841	Promoter (<=1kb)	158765741	158818227	52487	-	ENSG00000092820	ENST00000337147	0	EZR	ezrin [Source:HGNC Symbol;Acc:HGNC:12691]
6	158814024	158819629	5606	WT_un_S5_peak_7387d	59	4.606	5.94877	2.6174	3386	Promoter (<=1kb)	158765741	158818227	52487	-	ENSG00000092820	ENST00000337147	0	EZR	ezrin [Source:HGNC Symbol;Acc:HGNC:12691]
6	158814024	158819629	5606	WT_un_S5_peak_7387e	145	6.409	14.5125	10.6649	4193	Promoter (<=1kb)	158765741	158818227	52487	-	ENSG00000092820	ENST00000337147	0	EZR	ezrin [Source:HGNC Symbol;Acc:HGNC:12691]
6	158814024	158819629	5606	WT_un_S5_peak_7387f	43	3.7859	4.31451	1.1925	4734	Promoter (<=1kb)	158765741	158818227	52487	-	ENSG00000092820	ENST00000337147	0	EZR	ezrin [Source:HGNC Symbol;Acc:HGNC:12691]
6	158814024	158819629	5606	WT_un_S5_peak_7387g	59	4.94817	5.94877	2.6174	5334	Promoter (<=1kb)	158765741	158818227	52487	-	ENSG00000092820	ENST00000337147	0	EZR	ezrin [Source:HGNC Symbol;Acc:HGNC:12691]
12	56158180	56158727	548	WT_un_S5_peak_2066	152	7.63289	15.2574	11.372	257	Promoter (<=1kb)	56158346	56161575	3230	+	ENSG00000092841	ENST00000548580	0	MYL6	myosin light chain 6 [Source:HGNC Symbol;Acc:HGNC:7587]
12	56159118	56159386	269	WT_un_S5_peak_2067	28	3.00051	2.85297	0	222	Promoter (<=1kb)	56160036	56162970	2935	+	ENSG00000092841	ENST00000546845	-650	MYL6	myosin light chain 6 [Source:HGNC Symbol;Acc:HGNC:7587]
12	56161274	56161542	269	WT_un_S5_peak_2068	30	3.16327	3.06762	0.1564	239	Promoter (<=1kb)	56161781	56163496	1716	+	ENSG00000092841	ENST00000551954	-239	MYL6	myosin light chain 6 [Source:HGNC Symbol;Acc:HGNC:7587]
12	56163074	56165744	2671	WT_un_S5_peak_2069a	35	2.98733	3.53412	0.53357	267	Promoter (1-2kb)	56161781	56163496	1716	+	ENSG00000092841	ENST00000551954	1293	MYL6	myosin light chain 6 [Source:HGNC Symbol;Acc:HGNC:7587]
12	56163074	56165744	2671	WT_un_S5_peak_2069b	51	4.04769	5.11378	1.87259	950	Promoter (1-2kb)	56161781	56163496	1716	+	ENSG00000092841	ENST00000551954	1293	MYL6	myosin light chain 6 [Source:HGNC Symbol;Acc:HGNC:7587]
12	56163074	56165744	2671	WT_un_S5_peak_2069c	27	2.70548	2.76251	0	1776	Promoter (1-2kb)	56161781	56163496	1716	+	ENSG00000092841	ENST00000551954	1293	MYL6	myosin light chain 6 [Source:HGNC Symbol;Acc:HGNC:7587]
12	56163074	56165744	2671	WT_un_S5_peak_2069d	28	3.00051	2.85297	0	2342	Promoter (1-2kb)	56161781	56163496	1716	+	ENSG00000092841	ENST00000551954	1293	MYL6	myosin light chain 6 [Source:HGNC Symbol;Acc:HGNC:7587]
1	35769213	35770190	978	WT_un_S5_peak_177	183	7.26442	18.3673	14.3815	629	Promoter (<=1kb)	35720218	35769967	49750	-	ENSG00000092853	ENST00000251195	0	CLSPN	claspin [Source:HGNC Symbol;Acc:HGNC:19715]
17	76735959	76737925	1967	WT_un_S5_peak_3614a	36	3.29878	3.62443	0.59626	193	Promoter (<=1kb)	76736311	76778572	42262	+	ENSG00000092931	ENST00000588460	0	MFSD11	major facilitator superfamily domain containing 11 [Source:HGNC Symbol;Acc:HGNC:25458]
17	76735959	76737925	1967	WT_un_S5_peak_3614b	724	16.0765	72.4051	67.4466	1343	Promoter (<=1kb)	76736311	76778572	42262	+	ENSG00000092931	ENST00000588460	0	MFSD11	major facilitator superfamily domain containing 11 [Source:HGNC Symbol;Acc:HGNC:25458]
8	26576924	26578113	1190	WT_un_S5_peak_7840a	34	3.12456	3.41144	0.44405	117	Promoter (<=1kb)	26577062	26583965	6904	+	ENSG00000092964	ENST00000493789	0	DPYSL2	dihydropyrimidinase like 2 [Source:HGNC Symbol;Acc:HGNC:3014]
8	26576924	26578113	1190	WT_un_S5_peak_7840b	71	4.65948	7.14869	3.7138	766	Promoter (<=1kb)	26577062	26583965	6904	+	ENSG00000092964	ENST00000493789	0	DPYSL2	dihydropyrimidinase like 2 [Source:HGNC Symbol;Acc:HGNC:3014]
8	26609576	26609992	417	WT_un_S5_peak_7841	54	4.55817	5.42044	2.14934	183	Intron (ENST00000521913/ENSG00000092964, intron 3 of 13)	26619508	26624173	4666	+	ENSG00000092964	ENST00000523690	-9516	DPYSL2	dihydropyrimidinase like 2 [Source:HGNC Symbol;Acc:HGNC:3014]
1	218344627	218354369	9743	WT_un_S5_peak_803a	547	19.4936	54.7749	50.0753	825	Promoter (<=1kb)	218345336	218444619	99284	+	ENSG00000092969	ENST00000366930	0	TGFB2	transforming growth factor beta 2 [Source:HGNC Symbol;Acc:HGNC:11768]
1	218344627	218354369	9743	WT_un_S5_peak_803b	321	14.9666	32.1008	27.7902	2500	Promoter (<=1kb)	218345336	218444619	99284	+	ENSG00000092969	ENST00000366930	0	TGFB2	transforming growth factor beta 2 [Source:HGNC Symbol;Acc:HGNC:11768]
1	218344627	218354369	9743	WT_un_S5_peak_803c	100	5.04033	10.0802	6.44639	3001	Promoter (<=1kb)	218345336	218444619	99284	+	ENSG00000092969	ENST00000366930	0	TGFB2	transforming growth factor beta 2 [Source:HGNC Symbol;Acc:HGNC:11768]
1	218344627	218354369	9743	WT_un_S5_peak_803d	202	9.1295	20.246	16.2017	3630	Promoter (<=1kb)	218345336	218444619	99284	+	ENSG00000092969	ENST00000366930	0	TGFB2	transforming growth factor beta 2 [Source:HGNC Symbol;Acc:HGNC:11768]
1	218344627	218354369	9743	WT_un_S5_peak_803e	107	5.69337	10.785	7.11935	4212	Promoter (<=1kb)	218345336	218444619	99284	+	ENSG00000092969	ENST00000366930	0	TGFB2	transforming growth factor beta 2 [Source:HGNC Symbol;Acc:HGNC:11768]
1	218344627	218354369	9743	WT_un_S5_peak_803f	172	9.67918	17.2452	13.2916	4913	Promoter (<=1kb)	218345336	218444619	99284	+	ENSG00000092969	ENST00000366930	0	TGFB2	transforming growth factor beta 2 [Source:HGNC Symbol;Acc:HGNC:11768]
1	218344627	218354369	9743	WT_un_S5_peak_803g	123	7.60113	12.3888	8.62888	5529	Promoter (<=1kb)	218345336	218444619	99284	+	ENSG00000092969	ENST00000366930	0	TGFB2	transforming growth factor beta 2 [Source:HGNC Symbol;Acc:HGNC:11768]
1	218344627	218354369	9743	WT_un_S5_peak_803h	51	4.39231	5.17643	1.93189	6288	Promoter (<=1kb)	218345336	218444619	99284	+	ENSG00000092969	ENST00000366930	0	TGFB2	transforming growth factor beta 2 [Source:HGNC Symbol;Acc:HGNC:11768]
1	218344627	218354369	9743	WT_un_S5_peak_803i	40	3.5795	4.07966	0.98433	6793	Promoter (<=1kb)	218345336	218444619	99284	+	ENSG00000092969	ENST00000366930	0	TGFB2	transforming growth factor beta 2 [Source:HGNC Symbol;Acc:HGNC:11768]
1	218344627	218354369	9743	WT_un_S5_peak_803j	36	3.07067	3.62443	0.59626	7196	Promoter (<=1kb)	218345336	218444619	99284	+	ENSG00000092969	ENST00000366930	0	TGFB2	transforming growth factor beta 2 [Source:HGNC Symbol;Acc:HGNC:11768]
1	218344627	218354369	9743	WT_un_S5_peak_803k	80	5.64577	8.01858	4.50918	8061	Promoter (<=1kb)	218345336	218444619	99284	+	ENSG00000092969	ENST00000366930	0	TGFB2	transforming growth factor beta 2 [Source:HGNC Symbol;Acc:HGNC:11768]
1	218344627	218354369	9743	WT_un_S5_peak_803l	50	3.98311	5.08049	1.8432	8729	Promoter (<=1kb)	218345336	218444619	99284	+	ENSG00000092969	ENST00000366930	0	TGFB2	transforming growth factor beta 2 [Source:HGNC Symbol;Acc:HGNC:11768]
1	218344627	218354369	9743	WT_un_S5_peak_803m	30	3.11882	3.06293	0.15335	9237	Promoter (<=1kb)	218345336	218444619	99284	+	ENSG00000092969	ENST00000366930	0	TGFB2	transforming growth factor beta 2 [Source:HGNC Symbol;Acc:HGNC:11768]
1	218344627	218354369	9743	WT_un_S5_peak_803n	47	4.10774	4.76379	1.57115	9625	Promoter (<=1kb)	218345336	218444619	99284	+	ENSG00000092969	ENST00000366930	0	TGFB2	transforming growth factor beta 2 [Source:HGNC Symbol;Acc:HGNC:11768]
1	218355656	218356836	1181	WT_un_S5_peak_804	41	3.98462	4.16545	1.05527	221	Intron (ENST00000366930/ENSG00000092969, intron 1 of 6)	218347038	218434312	87275	+	ENSG00000092969	ENST00000488793	8618	TGFB2	transforming growth factor beta 2 [Source:HGNC Symbol;Acc:HGNC:11768]
1	218357542	218357828	287	WT_un_S5_peak_805	43	3.7859	4.31451	1.1925	122	Intron (ENST00000366930/ENSG00000092969, intron 1 of 6)	218347038	218434312	87275	+	ENSG00000092969	ENST00000488793	10504	TGFB2	transforming growth factor beta 2 [Source:HGNC Symbol;Acc:HGNC:11768]
1	218360870	218361917	1048	WT_un_S5_peak_806	47	4.10774	4.76379	1.57115	243	Intron (ENST00000366930/ENSG00000092969, intron 1 of 6)	218347038	218434312	87275	+	ENSG00000092969	ENST00000488793	13832	TGFB2	transforming growth factor beta 2 [Source:HGNC Symbol;Acc:HGNC:11768]
1	218362072	218363854	1783	WT_un_S5_peak_807a	40	3.92167	4.07966	0.98433	240	Exon (ENST00000366929/ENSG00000092969, exon 2 of 8)	218347038	218434312	87275	+	ENSG00000092969	ENST00000488793	15034	TGFB2	transforming growth factor beta 2 [Source:HGNC Symbol;Acc:HGNC:11768]
1	218362072	218363854	1783	WT_un_S5_peak_807b	44	3.82659	4.45165	1.28046	755	Exon (ENST00000366929/ENSG00000092969, exon 2 of 8)	218347038	218434312	87275	+	ENSG00000092969	ENST00000488793	15034	TGFB2	transforming growth factor beta 2 [Source:HGNC Symbol;Acc:HGNC:11768]
1	218362072	218363854	1783	WT_un_S5_peak_807c	40	3.92167	4.07966	0.98433	1319	Exon (ENST00000366929/ENSG00000092969, exon 2 of 8)	218347038	218434312	87275	+	ENSG00000092969	ENST00000488793	15034	TGFB2	transforming growth factor beta 2 [Source:HGNC Symbol;Acc:HGNC:11768]
1	218367282	218367598	317	WT_un_S5_peak_808	26	3.0674	2.65555	0	178	Intron (ENST00000366930/ENSG00000092969, intron 1 of 6)	218347038	218434312	87275	+	ENSG00000092969	ENST00000488793	20244	TGFB2	transforming growth factor beta 2 [Source:HGNC Symbol;Acc:HGNC:11768]
1	217630700	217631710	1011	WT_un_S5_peak_801a	109	7.11867	10.9254	7.24635	276	Promoter (<=1kb)	217426992	217631090	204099	-	ENSG00000092978	ENST00000366935	0	GPATCH2	G-patch domain containing 2 [Source:HGNC Symbol;Acc:HGNC:25499]
1	217630700	217631710	1011	WT_un_S5_peak_801b	25	2.76105	2.57922	0	995	Promoter (<=1kb)	217426992	217631090	204099	-	ENSG00000092978	ENST00000366935	0	GPATCH2	G-patch domain containing 2 [Source:HGNC Symbol;Acc:HGNC:25499]
22	45163563	45164008	446	WT_un_S5_peak_5286	30	3.11882	3.06293	0.15335	304	Promoter (<=1kb)	45163925	45188017	24093	+	ENSG00000093000	ENST00000347635	0	NUP50	nucleoporin 50 [Source:HGNC Symbol;Acc:HGNC:8065]
22	19479721	19480302	582	WT_un_S5_peak_5160	78	5.514	7.86411	4.37249	253	Promoter (<=1kb)	19479738	19483873	4136	+	ENSG00000093009	ENST00000491520	0	CDC45	cell division cycle 45 [Source:HGNC Symbol;Acc:HGNC:1739]
22	19941813	19942105	293	WT_un_S5_peak_5167	36	3.07067	3.62443	0.59626	146	Promoter (<=1kb)	19941834	19969874	28041	+	ENSG00000093010	ENST00000678769	0	COMT	catechol-O-methyltransferase [Source:HGNC Symbol;Acc:HGNC:2228]
22	19942649	19942988	340	WT_un_S5_peak_5168	24	2.6954	2.45052	0	143	Promoter (<=1kb)	19941871	19968922	27052	+	ENSG00000093010	ENST00000428707	778	COMT	catechol-O-methyltransferase [Source:HGNC Symbol;Acc:HGNC:2228]
22	19960793	19961061	269	WT_un_S5_peak_5169	30	2.67177	3.0055	0.11292	108	Promoter (1-2kb)	19962570	19968998	6429	+	ENSG00000093010	ENST00000449653	-1509	COMT	catechol-O-methyltransferase [Source:HGNC Symbol;Acc:HGNC:2228]
6	127342932	127343799	868	WT_un_S5_peak_7298a	54	4.27134	5.44039	2.16645	165	Promoter (<=1kb)	127288712	127343609	54898	-	ENSG00000093144	ENST00000454859	0	ECHDC1	ethylmalonyl-CoA decarboxylase 1 [Source:HGNC Symbol;Acc:HGNC:21489]
6	127342932	127343799	868	WT_un_S5_peak_7298b	58	4.21122	5.86499	2.55229	570	Promoter (<=1kb)	127288712	127343609	54898	-	ENSG00000093144	ENST00000454859	0	ECHDC1	ethylmalonyl-CoA decarboxylase 1 [Source:HGNC Symbol;Acc:HGNC:21489]
3	42600989	42601325	337	WT_un_S5_peak_5472	29	2.79627	2.9361	0.0587	154	Promoter (<=1kb)	42548004	42601080	53077	-	ENSG00000093183	ENST00000417572	0	SEC22C	SEC22 homolog C, vesicle trafficking protein [Source:HGNC Symbol;Acc:HGNC:16828]
X	48801898	48802436	539	WT_un_S5_peak_8612	44	4.19238	4.45165	1.28046	320	Promoter (<=1kb)	48801949	48806706	4758	+	ENSG00000094631	ENST00000376610	0	HDAC6	histone deacetylase 6 [Source:HGNC Symbol;Acc:HGNC:14064]
17	40287699	40288222	524	WT_un_S5_peak_3371	132	7.49787	13.2219	9.42896	243	Promoter (<=1kb)	40287879	40304657	16779	+	ENSG00000094804	ENST00000209728	0	CDC6	cell division cycle 6 [Source:HGNC Symbol;Acc:HGNC:1744]
12	54279382	54281998	2617	WT_un_S5_peak_2048a	338	14.773	33.8199	29.4751	282	Promoter (<=1kb)	54230942	54280122	49181	-	ENSG00000094916	ENST00000209875	0	CBX5	chromobox 5 [Source:HGNC Symbol;Acc:HGNC:1555]
12	54279382	54281998	2617	WT_un_S5_peak_2048b	367	13.3357	36.7173	32.3181	1381	Promoter (<=1kb)	54230942	54280122	49181	-	ENSG00000094916	ENST00000209875	0	CBX5	chromobox 5 [Source:HGNC Symbol;Acc:HGNC:1555]
12	54279382	54281998	2617	WT_un_S5_peak_2048c	44	4.19238	4.45165	1.28046	2463	Promoter (<=1kb)	54230942	54280122	49181	-	ENSG00000094916	ENST00000209875	0	CBX5	chromobox 5 [Source:HGNC Symbol;Acc:HGNC:1555]
1	172532153	172532518	366	WT_un_S5_peak_672	64	4.92395	6.43923	3.05901	153	Promoter (<=1kb)	172532349	172611833	79485	+	ENSG00000094975	ENST00000367723	0	SUCO	SUN domain containing ossification factor [Source:HGNC Symbol;Acc:HGNC:1240]
1	172532865	172533468	604	WT_un_S5_peak_673	132	7.73378	13.2506	9.45305	332	Promoter (<=1kb)	172533118	172611831	78714	+	ENSG00000094975	ENST00000616058	0	SUCO	SUN domain containing ossification factor [Source:HGNC Symbol;Acc:HGNC:1240]
5	56816463	56817117	655	WT_un_S5_peak_6371	44	4.19238	4.45165	1.28046	320	Promoter (<=1kb)	56815549	56896152	80604	+	ENSG00000095015	ENST00000399503	914	MAP3K1	mitogen-activated protein kinase kinase kinase 1 [Source:HGNC Symbol;Acc:HGNC:6848]
5	56824419	56824687	269	WT_un_S5_peak_6372	26	2.72923	2.69119	0	114	Intron (ENST00000399503/ENSG00000095015, intron 1 of 19)	56815549	56896152	80604	+	ENSG00000095015	ENST00000399503	8870	MAP3K1	mitogen-activated protein kinase kinase kinase 1 [Source:HGNC Symbol;Acc:HGNC:6848]
19	12681301	12681883	583	WT_un_S5_peak_3893	52	4.10644	5.26534	2.01777	301	Promoter (<=1kb)	12675717	12681880	6164	-	ENSG00000095059	ENST00000210060	0	DHPS	deoxyhypusine synthase [Source:HGNC Symbol;Acc:HGNC:2869]
19	12791192	12795440	4249	WT_un_S5_peak_3895a	1018	33.5778	101.899	96.5907	342	Promoter (<=1kb)	12774502	12792582	18081	-	ENSG00000095066	ENST00000593143	0	HOOK2	hook microtubule tethering protein 2 [Source:HGNC Symbol;Acc:HGNC:19885]
19	12791192	12795440	4249	WT_un_S5_peak_3895b	163	9.03093	16.3605	12.4386	1718	Promoter (<=1kb)	12774502	12792582	18081	-	ENSG00000095066	ENST00000593143	0	HOOK2	hook microtubule tethering protein 2 [Source:HGNC Symbol;Acc:HGNC:19885]
19	12791192	12795440	4249	WT_un_S5_peak_3895c	439	18.0082	43.9556	39.4296	2391	Promoter (<=1kb)	12774502	12792582	18081	-	ENSG00000095066	ENST00000593143	0	HOOK2	hook microtubule tethering protein 2 [Source:HGNC Symbol;Acc:HGNC:19885]
19	12791192	12795440	4249	WT_un_S5_peak_3895d	92	4.86925	9.25272	5.66888	3612	Promoter (<=1kb)	12774502	12792582	18081	-	ENSG00000095066	ENST00000593143	0	HOOK2	hook microtubule tethering protein 2 [Source:HGNC Symbol;Acc:HGNC:19885]
9	120842642	120843505	864	WT_un_S5_peak_8441	44	3.82659	4.45165	1.28046	467	Promoter (<=1kb)	120816053	120842922	26870	-	ENSG00000095261	ENST00000210313	0	PSMD5	proteasome 26S subunit, non-ATPase 5 [Source:HGNC Symbol;Acc:HGNC:9563]
9	129110725	129111159	435	WT_un_S5_peak_8476	65	4.29309	6.54042	3.15549	258	Promoter (<=1kb)	129094142	129110791	16650	-	ENSG00000095321	ENST00000680523	0	CRAT	carnitine O-acetyltransferase [Source:HGNC Symbol;Acc:HGNC:2342]
9	98056562	98057058	497	WT_un_S5_peak_8384	116	6.28107	11.6317	7.91458	260	Promoter (<=1kb)	98056732	98083077	26346	+	ENSG00000095380	ENST00000210444	0	NANS	N-acetylneuraminate synthase [Source:HGNC Symbol;Acc:HGNC:19237]
9	98255585	98255967	383	WT_un_S5_peak_8385	26	3.09502	2.69119	0	329	Promoter (<=1kb)	98199011	98255649	56639	-	ENSG00000095383	ENST00000465784	0	TBC1D2	TBC1 domain family member 2 [Source:HGNC Symbol;Acc:HGNC:18026]
10	91923521	91924058	538	WT_un_S5_peak_1119	62	4.78655	6.20573	2.85569	192	Promoter (<=1kb)	91923770	92030325	106556	+	ENSG00000095564	ENST00000265990	0	BTAF1	B-TFIID TATA-box binding protein associated factor 1 [Source:HGNC Symbol;Acc:HGNC:17307]
10	28677328	28677905	578	WT_un_S5_peak_966	76	5.38749	7.67276	4.19448	184	Promoter (<=1kb)	28677510	28682677	5168	+	ENSG00000095739	ENST00000497699	0	BAMBI	BMP and activin membrane bound inhibitor [Source:HGNC Symbol;Acc:HGNC:30251]
19	55370174	55370782	609	WT_un_S5_peak_4191	60	4.66734	6.09398	2.75146	315	Promoter (<=1kb)	55364382	55370463	6082	-	ENSG00000095752	ENST00000264563	0	IL11	interleukin 11 [Source:HGNC Symbol;Acc:HGNC:5966]
10	28532685	28533128	444	WT_un_S5_peak_965	68	4.83308	6.82947	3.41799	221	Promoter (<=1kb)	28532768	28590832	58065	+	ENSG00000095787	ENST00000651598	0	WAC	WW domain containing adaptor with coiled-coil [Source:HGNC Symbol;Acc:HGNC:17327]
10	35127032	35127648	617	WT_un_S5_peak_979	87	6.08558	8.72862	5.16636	205	Promoter (<=1kb)	35127048	35179304	52257	+	ENSG00000095794	ENST00000482633	0	CREM	cAMP responsive element modulator [Source:HGNC Symbol;Acc:HGNC:2352]
6	12012875	12013353	479	WT_un_S5_peak_6892	55	3.70969	5.53557	2.25315	200	Promoter (<=1kb)	12012702	12120180	107479	+	ENSG00000095951	ENST00000478545	173	HIVEP1	HIVEP zinc finger 1 [Source:HGNC Symbol;Acc:HGNC:4920]
6	43687498	43687878	381	WT_un_S5_peak_7118	60	4.61881	6.02291	2.68389	173	Promoter (<=1kb)	43671202	43687791	16590	-	ENSG00000096080	ENST00000372133	0	MRPS18A	mitochondrial ribosomal protein S18A [Source:HGNC Symbol;Acc:HGNC:14515]
6	52419774	52421213	1440	WT_un_S5_peak_7148a	201	10.3002	20.1399	16.0974	269	Promoter (<=1kb)	52420107	52492407	72301	+	ENSG00000096093	ENST00000636489	0	EFHC1	EF-hand domain containing 1 [Source:HGNC Symbol;Acc:HGNC:16406]
6	52419774	52421213	1440	WT_un_S5_peak_7148b	229	11.7155	22.9913	18.8728	781	Promoter (<=1kb)	52420107	52492407	72301	+	ENSG00000096093	ENST00000636489	0	EFHC1	EF-hand domain containing 1 [Source:HGNC Symbol;Acc:HGNC:16406]
6	52422081	52422395	315	WT_un_S5_peak_7149	23	2.49183	2.34975	0	115	Promoter (1-2kb)	52421036	52452770	31735	+	ENSG00000096093	ENST00000638075	1045	EFHC1	EF-hand domain containing 1 [Source:HGNC Symbol;Acc:HGNC:16406]
6	52503330	52503646	317	WT_un_S5_peak_7150	24	2.89517	2.43654	0	92	Intron (ENST00000637353/ENSG00000096093, intron 10 of 10)	52485169	52489476	4308	+	ENSG00000096093	ENST00000636169	18161	EFHC1	EF-hand domain containing 1 [Source:HGNC Symbol;Acc:HGNC:16406]
6	52504342	52504883	542	WT_un_S5_peak_7151	38	3.44846	3.88541	0.82322	287	Exon (ENST00000182527/ENSG00000065308, exon 10 of 11)	52522989	52529886	6898	+	ENSG00000096093	ENST00000636713	-18106	EFHC1	EF-hand domain containing 1 [Source:HGNC Symbol;Acc:HGNC:16406]
6	44246766	44247432	667	WT_un_S5_peak_7120	347	11.0282	34.7042	30.3418	342	Promoter (<=1kb)	44247087	44253883	6797	+	ENSG00000096384	ENST00000353801	0	HSP90AB1	heat shock protein 90 alpha family class B member 1 [Source:HGNC Symbol;Acc:HGNC:5258]
6	44248080	44248413	334	WT_un_S5_peak_7121	42	3.74733	4.26024	1.14417	170	Promoter (<=1kb)	44247866	44253883	6018	+	ENSG00000096384	ENST00000371554	214	HSP90AB1	heat shock protein 90 alpha family class B member 1 [Source:HGNC Symbol;Acc:HGNC:5258]
6	44387371	44388057	687	WT_un_S5_peak_7128	101	6.659	10.1966	6.55518	378	Promoter (<=1kb)	44387706	44450425	62720	+	ENSG00000096401	ENST00000371477	0	CDC5L	cell division cycle 5 like [Source:HGNC Symbol;Acc:HGNC:1743]
6	44397941	44398292	352	WT_un_S5_peak_7129	35	3.46081	3.53919	0.53357	140	Intron (ENST00000371477/ENSG00000096401, intron 5 of 15)	44387706	44450425	62720	+	ENSG00000096401	ENST00000371477	10235	CDC5L	cell division cycle 5 like [Source:HGNC Symbol;Acc:HGNC:1743]
10	67884454	67884786	333	WT_un_S5_peak_1047	76	4.356	7.66459	4.19151	204	Promoter (<=1kb)	67884656	67918390	33735	+	ENSG00000096717	ENST00000212015	0	SIRT1	sirtuin 1 [Source:HGNC Symbol;Acc:HGNC:14929]
10	68331694	68332728	1035	WT_un_S5_peak_1049	328	15.2132	32.8437	28.5192	372	Promoter (<=1kb)	68331721	68339546	7826	+	ENSG00000096746	ENST00000461310	0	HNRNPH3	heterogeneous nuclear ribonucleoprotein H3 [Source:HGNC Symbol;Acc:HGNC:5043]
9	26946970	26947719	750	WT_un_S5_peak_8263a	79	5.6325	7.99793	4.48953	188	Promoter (<=1kb)	26947039	26988728	41690	+	ENSG00000096872	ENST00000519968	0	IFT74	intraflagellar transport 74 [Source:HGNC Symbol;Acc:HGNC:21424]
9	26946970	26947719	750	WT_un_S5_peak_8263b	38	3.40435	3.82039	0.77264	606	Promoter (<=1kb)	26947039	26988728	41690	+	ENSG00000096872	ENST00000519968	0	IFT74	intraflagellar transport 74 [Source:HGNC Symbol;Acc:HGNC:21424]
9	26955966	26956703	738	WT_un_S5_peak_8264	79	5.6325	7.99793	4.48953	473	Promoter (<=1kb)	26956350	27062884	106535	+	ENSG00000096872	ENST00000648373	0	IFT74	intraflagellar transport 74 [Source:HGNC Symbol;Acc:HGNC:21424]
9	130712677	130713076	400	WT_un_S5_peak_8491	32	2.82624	3.27274	0.32844	257	Promoter (<=1kb)	130713016	130885683	172668	+	ENSG00000097007	ENST00000372348	0	ABL1	ABL proto-oncogene 1, non-receptor tyrosine kinase [Source:HGNC Symbol;Acc:HGNC:76]
1	86704589	86704915	327	WT_un_S5_peak_370	33	2.92259	3.39624	0.43095	143	Promoter (<=1kb)	86704895	86743268	38374	+	ENSG00000097033	ENST00000482504	0	SH3GLB1	SH3 domain containing GRB2 like, endophilin B1 [Source:HGNC Symbol;Acc:HGNC:10833]
1	91500390	91501756	1367	WT_un_S5_peak_383	50	3.755	5.08049	1.8432	845	Promoter (<=1kb)	91500851	91525764	24914	+	ENSG00000097046	ENST00000234626	0	CDC7	cell division cycle 7 [Source:HGNC Symbol;Acc:HGNC:1745]
10	100346675	100347169	495	WT_un_S5_peak_1153	44	4.19238	4.45165	1.28046	445	Promoter (<=1kb)	100347233	100364826	17594	+	ENSG00000099194	ENST00000370355	-64	SCD	stearoyl-CoA desaturase [Source:HGNC Symbol;Acc:HGNC:10571]
10	114630037	114633838	3802	WT_un_S5_peak_1209a	120	7.40414	12.0765	8.33825	265	Promoter (<=1kb)	114444086	114632092	188007	-	ENSG00000099204	ENST00000651023	0	ABLIM1	actin binding LIM protein 1 [Source:HGNC Symbol;Acc:HGNC:78]
10	114630037	114633838	3802	WT_un_S5_peak_1209b	62	4.81145	6.26462	2.91185	1404	Promoter (<=1kb)	114444086	114632092	188007	-	ENSG00000099204	ENST00000651023	0	ABLIM1	actin binding LIM protein 1 [Source:HGNC Symbol;Acc:HGNC:78]
10	114630037	114633838	3802	WT_un_S5_peak_1209c	130	8.02831	13.0698	9.28605	1870	Promoter (<=1kb)	114444086	114632092	188007	-	ENSG00000099204	ENST00000651023	0	ABLIM1	actin binding LIM protein 1 [Source:HGNC Symbol;Acc:HGNC:78]
10	114630037	114633838	3802	WT_un_S5_peak_1209d	149	8.73252	14.9935	11.12	2225	Promoter (<=1kb)	114444086	114632092	188007	-	ENSG00000099204	ENST00000651023	0	ABLIM1	actin binding LIM protein 1 [Source:HGNC Symbol;Acc:HGNC:78]
10	114630037	114633838	3802	WT_un_S5_peak_1209e	61	5.09726	6.16174	2.81544	3273	Promoter (<=1kb)	114444086	114632092	188007	-	ENSG00000099204	ENST00000651023	0	ABLIM1	actin binding LIM protein 1 [Source:HGNC Symbol;Acc:HGNC:78]
10	114634565	114635205	641	WT_un_S5_peak_1210	44	4.19238	4.45165	1.28046	469	Promoter (2-3kb)	114444086	114632092	188007	-	ENSG00000099204	ENST00000651023	-2473	ABLIM1	actin binding LIM protein 1 [Source:HGNC Symbol;Acc:HGNC:78]
10	114684276	114684772	497	WT_un_S5_peak_1211	34	3.38173	3.42749	0.45811	173	Promoter (<=1kb)	114431113	114684457	253345	-	ENSG00000099204	ENST00000392955	0	ABLIM1	actin binding LIM protein 1 [Source:HGNC Symbol;Acc:HGNC:78]
10	69456770	69457038	269	WT_un_S5_peak_1059	35	3.46081	3.53919	0.53357	128	Intron (ENST00000373290/ENSG00000099282, intron 1 of 7)	69451477	69484092	32616	+	ENSG00000099282	ENST00000478112	5293	TSPAN15	tetraspanin 15 [Source:HGNC Symbol;Acc:HGNC:23298]
10	50067692	50068252	561	WT_un_S5_peak_1011	56	4.38062	5.60575	2.31853	212	Promoter (<=1kb)	50067888	50133506	65619	+	ENSG00000099290	ENST00000611324	0	WASHC2A	WASH complex subunit 2A [Source:HGNC Symbol;Acc:HGNC:23416]
19	58572905	58573556	652	WT_un_S5_peak_4218	43	3.52689	4.33257	1.20064	471	Promoter (<=1kb)	58561932	58573298	11367	-	ENSG00000099326	ENST00000594234	0	MZF1	myeloid zinc finger 1 [Source:HGNC Symbol;Acc:HGNC:13108]
19	58573728	58573996	269	WT_un_S5_peak_4219	40	3.5402	4.02122	0.94915	148	Promoter (<=1kb)	58561933	58573575	11643	-	ENSG00000099326	ENST00000599369	-153	MZF1	myeloid zinc finger 1 [Source:HGNC Symbol;Acc:HGNC:13108]
19	38374479	38375098	620	WT_un_S5_peak_4016	81	5.37125	8.17721	4.66188	314	Promoter (<=1kb)	38374550	38383823	9274	+	ENSG00000099341	ENST00000620216	0	PSMD8	proteasome 26S subunit, non-ATPase 8 [Source:HGNC Symbol;Acc:HGNC:9566]
16	30997994	30998274	281	WT_un_S5_peak_3100	44	3.90533	4.47362	1.30106	142	Promoter (<=1kb)	30996199	30997044	846	-	ENSG00000099365	ENST00000566211	-950	STX1B	syntaxin 1B [Source:HGNC Symbol;Acc:HGNC:18539]
19	1259193	1259461	269	WT_un_S5_peak_3815	47	3.79103	4.79015	1.59279	117	Promoter (<=1kb)	1259384	1273172	13789	+	ENSG00000099622	ENST00000588030	0	CIRBP	cold inducible RNA binding protein [Source:HGNC Symbol;Acc:HGNC:1982]
19	1260179	1260731	553	WT_un_S5_peak_3816	37	3.36977	3.72574	0.68902	158	Promoter (<=1kb)	1261156	1271433	10278	+	ENSG00000099622	ENST00000588411	-425	CIRBP	cold inducible RNA binding protein [Source:HGNC Symbol;Acc:HGNC:1982]
19	1261014	1261878	865	WT_un_S5_peak_3817	59	4.57128	5.95321	2.61777	420	Promoter (<=1kb)	1261156	1271433	10278	+	ENSG00000099622	ENST00000588411	0	CIRBP	cold inducible RNA binding protein [Source:HGNC Symbol;Acc:HGNC:1982]
19	1262147	1262881	735	WT_un_S5_peak_3818a	45	3.94843	4.54278	1.36717	155	Promoter (<=1kb)	1261821	1264698	2878	+	ENSG00000099622	ENST00000589161	326	CIRBP	cold inducible RNA binding protein [Source:HGNC Symbol;Acc:HGNC:1982]
19	1262147	1262881	735	WT_un_S5_peak_3818b	49	4.22019	4.92356	1.71247	510	Promoter (<=1kb)	1261821	1264698	2878	+	ENSG00000099622	ENST00000589161	326	CIRBP	cold inducible RNA binding protein [Source:HGNC Symbol;Acc:HGNC:1982]
19	1265864	1266265	402	WT_un_S5_peak_3819	46	4.00398	4.61477	1.43357	256	Promoter (<=1kb)	1266653	1273172	6520	+	ENSG00000099622	ENST00000586472	-388	CIRBP	cold inducible RNA binding protein [Source:HGNC Symbol;Acc:HGNC:1982]
19	1268968	1270588	1621	WT_un_S5_peak_3820	752	27.5122	75.2536	70.2553	400	Promoter (<=1kb)	1269266	1272582	3317	+	ENSG00000099622	ENST00000585630	0	CIRBP	cold inducible RNA binding protein [Source:HGNC Symbol;Acc:HGNC:1982]
19	1270936	1271396	461	WT_un_S5_peak_3821	32	2.98441	3.20815	0.28334	122	Promoter (<=1kb)	1270943	1273104	2162	+	ENSG00000099622	ENST00000588344	0	CIRBP	cold inducible RNA binding protein [Source:HGNC Symbol;Acc:HGNC:1982]
19	14507569	14508163	595	WT_un_S5_peak_3917	28	2.73871	2.85297	0	245	Distal Intergenic	14517085	14563738	46654	+	ENSG00000099797	ENST00000600076	-8922	TECR	trans-2,3-enoyl-CoA reductase [Source:HGNC Symbol;Acc:HGNC:4551]
19	14512433	14512701	269	WT_un_S5_peak_3918	36	3.29878	3.62443	0.59626	132	Downstream (2-3kb)	14517085	14563738	46654	+	ENSG00000099797	ENST00000600076	-4384	TECR	trans-2,3-enoyl-CoA reductase [Source:HGNC Symbol;Acc:HGNC:4551]
19	14514287	14514660	374	WT_un_S5_peak_3919	35	3.05286	3.59708	0.58391	176	Promoter (2-3kb)	14517085	14563738	46654	+	ENSG00000099797	ENST00000600076	-2425	TECR	trans-2,3-enoyl-CoA reductase [Source:HGNC Symbol;Acc:HGNC:4551]
19	14516857	14517136	280	WT_un_S5_peak_3920	24	2.303	2.41987	0	38	Promoter (<=1kb)	14517085	14563738	46654	+	ENSG00000099797	ENST00000600076	0	TECR	trans-2,3-enoyl-CoA reductase [Source:HGNC Symbol;Acc:HGNC:4551]
19	14529365	14529798	434	WT_un_S5_peak_3922	47	4.07979	4.72691	1.54018	194	Promoter (<=1kb)	14529579	14564992	35414	+	ENSG00000099797	ENST00000598298	0	TECR	trans-2,3-enoyl-CoA reductase [Source:HGNC Symbol;Acc:HGNC:4551]
9	21802331	21802938	608	WT_un_S5_peak_8247	97	6.75288	9.74924	6.13049	394	Promoter (<=1kb)	21802636	21867081	64446	+	ENSG00000099810	ENST00000644715	0	MTAP	methylthioadenosine phosphorylase [Source:HGNC Symbol;Acc:HGNC:7413]
19	2475739	2476830	1092	WT_un_S5_peak_3828	696	24.9221	69.6876	64.7664	419	Promoter (<=1kb)	2476122	2476638	517	+	ENSG00000099860	ENST00000586759	0	GADD45B	growth arrest and DNA damage inducible beta [Source:HGNC Symbol;Acc:HGNC:4096]
19	2477806	2478107	302	WT_un_S5_peak_3829	38	3.72977	3.82039	0.77264	236	Promoter (1-2kb)	2476356	2477126	771	+	ENSG00000099860	ENST00000593043	1450	GADD45B	growth arrest and DNA damage inducible beta [Source:HGNC Symbol;Acc:HGNC:4096]
19	2478524	2479760	1237	WT_un_S5_peak_3830	67	5.09567	6.71822	3.31136	260	Promoter (2-3kb)	2476356	2477126	771	+	ENSG00000099860	ENST00000593043	2168	GADD45B	growth arrest and DNA damage inducible beta [Source:HGNC Symbol;Acc:HGNC:4096]
19	2051018	2051507	490	WT_un_S5_peak_3824	157	5.53887	15.7073	11.8104	216	Promoter (<=1kb)	2037465	2051224	13760	-	ENSG00000099875	ENST00000309340	0	MKNK2	MAPK interacting serine/threonine kinase 2 [Source:HGNC Symbol;Acc:HGNC:7111]
19	2059584	2059932	349	WT_un_S5_peak_3825	43	3.57009	4.39803	1.26294	161	Distal Intergenic	2046461	2051244	4784	-	ENSG00000099875	ENST00000589509	-8340	MKNK2	MAPK interacting serine/threonine kinase 2 [Source:HGNC Symbol;Acc:HGNC:7111]
22	20117814	20118152	339	WT_un_S5_peak_5171	35	2.81625	3.53412	0.53357	176	Promoter (<=1kb)	20117875	20122421	4547	+	ENSG00000099901	ENST00000421656	0	RANBP1	RAN binding protein 1 [Source:HGNC Symbol;Acc:HGNC:9847]
22	20507680	20508326	647	WT_un_S5_peak_5172	33	2.92259	3.39624	0.43095	128	Promoter (<=1kb)	20508048	20564509	56462	+	ENSG00000099917	ENST00000441501	0	MED15	mediator complex subunit 15 [Source:HGNC Symbol;Acc:HGNC:14248]
22	20509208	20509682	475	WT_un_S5_peak_5173	24	2.6954	2.45052	0	127	Promoter (1-2kb)	20508057	20537183	29127	+	ENSG00000099917	ENST00000438962	1151	MED15	mediator complex subunit 15 [Source:HGNC Symbol;Acc:HGNC:14248]
22	20982008	20982362	355	WT_un_S5_peak_5174	35	3.02588	3.5556	0.54929	128	Promoter (<=1kb)	20982269	20991685	9417	+	ENSG00000099949	ENST00000414985	0	LZTR1	leucine zipper like transcription regulator 1 [Source:HGNC Symbol;Acc:HGNC:6742]
22	20996963	20997903	941	WT_un_S5_peak_5175	47	3.29678	4.73337	1.54661	707	Promoter (1-2kb)	20995788	20997769	1982	+	ENSG00000099949	ENST00000498649	1175	LZTR1	leucine zipper like transcription regulator 1 [Source:HGNC Symbol;Acc:HGNC:6742]
22	20998141	20998474	334	WT_un_S5_peak_5176	53	3.5878	5.319	2.06588	161	Promoter (2-3kb)	20995788	20997769	1982	+	ENSG00000099949	ENST00000498649	2353	LZTR1	leucine zipper like transcription regulator 1 [Source:HGNC Symbol;Acc:HGNC:6742]
22	23787070	23787544	475	WT_un_S5_peak_5179	36	3.07067	3.62443	0.59626	259	Promoter (<=1kb)	23787182	23834270	47089	+	ENSG00000099956	ENST00000646723	0	SMARCB1	SWI/SNF related, matrix associated, actin dependent regulator of chromatin, subfamily b, member 1 [Source:HGNC Symbol;Acc:HGNC:11103]
22	17628457	17628883	427	WT_un_S5_peak_5155	26	2.63794	2.66487	0	155	Promoter (<=1kb)	17628855	17696209	67355	+	ENSG00000099968	ENST00000399781	0	BCL2L13	BCL2 like 13 [Source:HGNC Symbol;Acc:HGNC:17164]
22	17638263	17639346	1084	WT_un_S5_peak_5156	136	6.83059	13.6088	9.79503	502	Promoter (<=1kb)	17638584	17730855	92272	+	ENSG00000099968	ENST00000337612	0	BCL2L13	BCL2 like 13 [Source:HGNC Symbol;Acc:HGNC:17164]
22	30356587	30357226	640	WT_un_S5_peak_5201	87	6.08558	8.72862	5.16636	200	Promoter (<=1kb)	30331988	30356894	24907	-	ENSG00000099995	ENST00000215793	0	SF3A1	splicing factor 3a subunit 1 [Source:HGNC Symbol;Acc:HGNC:10765]
22	24270744	24271016	273	WT_un_S5_peak_5183	40	3.5402	4.02122	0.94915	167	Promoter (<=1kb)	24270817	24417739	146923	+	ENSG00000100014	ENST00000437398	0	SPECC1L	sperm antigen with calponin homology and coiled-coil domains 1 like [Source:HGNC Symbol;Acc:HGNC:29022]
22	24555015	24556184	1170	WT_un_S5_peak_5184a	33	3.33488	3.36179	0.3999	504	Promoter (<=1kb)	24555958	24558086	2129	+	ENSG00000100028	ENST00000468770	0	SNRPD3	small nuclear ribonucleoprotein D3 polypeptide [Source:HGNC Symbol;Acc:HGNC:11160]
22	24555015	24556184	1170	WT_un_S5_peak_5184b	40	3.5402	4.02122	0.94915	967	Promoter (<=1kb)	24555958	24558086	2129	+	ENSG00000100028	ENST00000468770	0	SNRPD3	small nuclear ribonucleoprotein D3 polypeptide [Source:HGNC Symbol;Acc:HGNC:11160]
22	37675135	37675933	799	WT_un_S5_peak_5242	101	6.659	10.1966	6.55518	478	Promoter (<=1kb)	37675636	37679802	4167	+	ENSG00000100097	ENST00000215909	0	LGALS1	galectin 1 [Source:HGNC Symbol;Acc:HGNC:6561]
22	37676606	37677317	712	WT_un_S5_peak_5243	36	3.29878	3.62443	0.59626	542	Promoter (<=1kb)	37676999	37679802	2804	+	ENSG00000100097	ENST00000472321	0	LGALS1	galectin 1 [Source:HGNC Symbol;Acc:HGNC:6561]
22	26483419	26483962	544	WT_un_S5_peak_5185	23	2.38633	2.34354	0	201	Promoter (<=1kb)	26450882	26483783	32902	-	ENSG00000100099	ENST00000398145	0	HPS4	HPS4 biogenesis of lysosomal organelles complex 3 subunit 2 [Source:HGNC Symbol;Acc:HGNC:15844]
22	26512248	26512641	394	WT_un_S5_peak_5186	24	2.89517	2.43654	0	196	Promoter (<=1kb)	26491240	26512473	21234	-	ENSG00000100109	ENST00000407690	0	TFIP11	tuftelin interacting protein 11 [Source:HGNC Symbol;Acc:HGNC:17165]
22	37807696	37808196	501	WT_un_S5_peak_5245	65	4.6961	6.55207	3.16577	267	Promoter (<=1kb)	37807905	37817176	9272	+	ENSG00000100116	ENST00000323205	0	GCAT	glycine C-acetyltransferase [Source:HGNC Symbol;Acc:HGNC:4188]
22	37812619	37812972	354	WT_un_S5_peak_5246	49	3.92836	4.92356	1.71247	180	3' UTR	37808014	37813609	5596	+	ENSG00000100116	ENST00000451984	4605	GCAT	glycine C-acetyltransferase [Source:HGNC Symbol;Acc:HGNC:4188]
22	37849132	37849522	391	WT_un_S5_peak_5247	52	4.11728	5.20795	1.9617	208	Promoter (<=1kb)	37831860	37849327	17468	-	ENSG00000100124	ENST00000609454	0	ANKRD54	ankyrin repeat domain 54 [Source:HGNC Symbol;Acc:HGNC:25185]
22	41800564	41800871	308	WT_un_S5_peak_5279	54	4.55817	5.42044	2.14934	165	Promoter (<=1kb)	41800679	41825893	25215	+	ENSG00000100147	ENST00000402061	0	CCDC134	coiled-coil domain containing 134 [Source:HGNC Symbol;Acc:HGNC:26185]
22	31753583	31754288	706	WT_un_S5_peak_5206	87	6.08558	8.72862	5.16636	234	Promoter (<=1kb)	31753867	31906992	153126	+	ENSG00000100150	ENST00000535622	0	DEPDC5	DEP domain containing 5, GATOR1 subcomplex subunit [Source:HGNC Symbol;Acc:HGNC:18423]
22	38057156	38057626	471	WT_un_S5_peak_5248	30	3.11882	3.06293	0.15335	228	Promoter (<=1kb)	38057200	38075701	18502	+	ENSG00000100151	ENST00000404072	0	PICK1	protein interacting with PRKCA 1 [Source:HGNC Symbol;Acc:HGNC:9394]
22	38479649	38480258	610	WT_un_S5_peak_5253	24	2.94165	2.49512	0	431	Exon (ENST00000409006/ENSG00000100196, exon 3 of 4)	38474329	38482922	8594	+	ENSG00000100196	ENST00000471268	5320	KDELR3	KDEL endoplasmic reticulum protein retention receptor 3 [Source:HGNC Symbol;Acc:HGNC:6306]
22	38480551	38480823	273	WT_un_S5_peak_5254	40	3.5402	4.02122	0.94915	143	Intron (ENST00000409006/ENSG00000100196, intron 3 of 3)	38474329	38482922	8594	+	ENSG00000100196	ENST00000471268	6222	KDELR3	KDEL endoplasmic reticulum protein retention receptor 3 [Source:HGNC Symbol;Acc:HGNC:6306]
22	28741878	28742452	575	WT_un_S5_peak_5190	39	3.49373	3.95231	0.88518	171	Promoter (<=1kb)	28742039	28757510	15472	+	ENSG00000100209	ENST00000216027	0	HSCB	HscB mitochondrial iron-sulfur cluster cochaperone [Source:HGNC Symbol;Acc:HGNC:28913]
22	38681920	38682229	310	WT_un_S5_peak_5255	23	2.61444	2.34354	0	128	Promoter (<=1kb)	38681957	38685421	3465	+	ENSG00000100216	ENST00000216034	0	TOMM22	translocase of outer mitochondrial membrane 22 [Source:HGNC Symbol;Acc:HGNC:18002]
22	28799439	28799707	269	WT_un_S5_peak_5192	23	2.61444	2.34354	0	240	Promoter (<=1kb)	28794589	28800133	5545	-	ENSG00000100219	ENST00000405219	426	XBP1	X-box binding protein 1 [Source:HGNC Symbol;Acc:HGNC:12801]
22	28800046	28800875	830	WT_un_S5_peak_5193a	79	5.6325	7.99793	4.48953	267	Promoter (<=1kb)	28794555	28800597	6043	-	ENSG00000100219	ENST00000216037	0	XBP1	X-box binding protein 1 [Source:HGNC Symbol;Acc:HGNC:12801]
22	28800046	28800875	830	WT_un_S5_peak_5193b	213	11.5081	21.3302	17.2569	585	Promoter (<=1kb)	28794555	28800597	6043	-	ENSG00000100219	ENST00000216037	0	XBP1	X-box binding protein 1 [Source:HGNC Symbol;Acc:HGNC:12801]
22	38701015	38701283	269	WT_un_S5_peak_5256	35	3.01827	3.58391	0.57128	158	Promoter (<=1kb)	38689074	38701030	11957	-	ENSG00000100221	ENST00000427389	0	JOSD1	Josephin domain containing 1 [Source:HGNC Symbol;Acc:HGNC:28953]
22	38733939	38734207	269	WT_un_S5_peak_5257	25	2.9824	2.54679	0	95	Promoter (<=1kb)	38734324	38736175	1852	+	ENSG00000100226	ENST00000487538	-117	GTPBP1	GTP binding protein 1 [Source:HGNC Symbol;Acc:HGNC:4669]
22	42614283	42615985	1703	WT_un_S5_peak_5283a	36	3.63673	3.6957	0.65998	152	Promoter (<=1kb)	42583721	42614869	31149	-	ENSG00000100227	ENST00000445215	0	POLDIP3	DNA polymerase delta interacting protein 3 [Source:HGNC Symbol;Acc:HGNC:23782]
22	42614283	42615985	1703	WT_un_S5_peak_5283b	771	28.6249	77.1491	72.1232	1057	Promoter (<=1kb)	42583721	42614869	31149	-	ENSG00000100227	ENST00000445215	0	POLDIP3	DNA polymerase delta interacting protein 3 [Source:HGNC Symbol;Acc:HGNC:23782]
22	32801364	32805334	3971	WT_un_S5_peak_5210a	370	11.5415	37.0673	32.663	422	Promoter (<=1kb)	32801705	32863041	61337	+	ENSG00000100234	ENST00000266085	0	TIMP3	TIMP metallopeptidase inhibitor 3 [Source:HGNC Symbol;Acc:HGNC:11822]
22	32801364	32805334	3971	WT_un_S5_peak_5210b	71	5.44974	7.1919	3.75515	1463	Promoter (<=1kb)	32801705	32863041	61337	+	ENSG00000100234	ENST00000266085	0	TIMP3	TIMP metallopeptidase inhibitor 3 [Source:HGNC Symbol;Acc:HGNC:11822]
22	32801364	32805334	3971	WT_un_S5_peak_5210c	92	6.41824	9.23483	5.65259	1784	Promoter (<=1kb)	32801705	32863041	61337	+	ENSG00000100234	ENST00000266085	0	TIMP3	TIMP metallopeptidase inhibitor 3 [Source:HGNC Symbol;Acc:HGNC:11822]
22	32801364	32805334	3971	WT_un_S5_peak_5210d	60	4.67994	6.06204	2.72064	2341	Promoter (<=1kb)	32801705	32863041	61337	+	ENSG00000100234	ENST00000266085	0	TIMP3	TIMP metallopeptidase inhibitor 3 [Source:HGNC Symbol;Acc:HGNC:11822]
22	32801364	32805334	3971	WT_un_S5_peak_5210e	49	4.21702	4.92149	1.71247	2870	Promoter (<=1kb)	32801705	32863041	61337	+	ENSG00000100234	ENST00000266085	0	TIMP3	TIMP metallopeptidase inhibitor 3 [Source:HGNC Symbol;Acc:HGNC:11822]
22	32801364	32805334	3971	WT_un_S5_peak_5210f	69	5.29033	6.95301	3.52892	3201	Promoter (<=1kb)	32801705	32863041	61337	+	ENSG00000100234	ENST00000266085	0	TIMP3	TIMP metallopeptidase inhibitor 3 [Source:HGNC Symbol;Acc:HGNC:11822]
22	32801364	32805334	3971	WT_un_S5_peak_5210g	115	7.46122	11.5274	7.81317	3601	Promoter (<=1kb)	32801705	32863041	61337	+	ENSG00000100234	ENST00000266085	0	TIMP3	TIMP metallopeptidase inhibitor 3 [Source:HGNC Symbol;Acc:HGNC:11822]
22	32805494	32806533	1040	WT_un_S5_peak_5211	50	4.33228	5.08882	1.85064	136	Intron (ENST00000266085/ENSG00000100234, intron 1 of 4)	32801705	32863041	61337	+	ENSG00000100234	ENST00000266085	3789	TIMP3	TIMP metallopeptidase inhibitor 3 [Source:HGNC Symbol;Acc:HGNC:11822]
22	32806842	32807151	310	WT_un_S5_peak_5212	40	3.92167	4.07966	0.98433	167	Intron (ENST00000266085/ENSG00000100234, intron 1 of 4)	32801705	32863041	61337	+	ENSG00000100234	ENST00000266085	5137	TIMP3	TIMP metallopeptidase inhibitor 3 [Source:HGNC Symbol;Acc:HGNC:11822]
22	32808081	32808603	523	WT_un_S5_peak_5213	23	2.78918	2.30424	0	83	Intron (ENST00000266085/ENSG00000100234, intron 1 of 4)	32801705	32863041	61337	+	ENSG00000100234	ENST00000266085	6376	TIMP3	TIMP metallopeptidase inhibitor 3 [Source:HGNC Symbol;Acc:HGNC:11822]
22	32811015	32811501	487	WT_un_S5_peak_5214	44	4.19238	4.45165	1.28046	285	Intron (ENST00000266085/ENSG00000100234, intron 1 of 4)	32801705	32863041	61337	+	ENSG00000100234	ENST00000266085	9310	TIMP3	TIMP metallopeptidase inhibitor 3 [Source:HGNC Symbol;Acc:HGNC:11822]
22	32813003	32813385	383	WT_un_S5_peak_5215	26	2.72923	2.69119	0	267	Intron (ENST00000266085/ENSG00000100234, intron 1 of 4)	32801705	32863041	61337	+	ENSG00000100234	ENST00000266085	11298	TIMP3	TIMP metallopeptidase inhibitor 3 [Source:HGNC Symbol;Acc:HGNC:11822]
22	32817354	32817720	367	WT_un_S5_peak_5216	26	2.72923	2.69119	0	221	Intron (ENST00000266085/ENSG00000100234, intron 1 of 4)	32801705	32863041	61337	+	ENSG00000100234	ENST00000266085	15649	TIMP3	TIMP metallopeptidase inhibitor 3 [Source:HGNC Symbol;Acc:HGNC:11822]
22	32818672	32819303	632	WT_un_S5_peak_5217	44	3.82659	4.45165	1.28046	413	Intron (ENST00000266085/ENSG00000100234, intron 1 of 4)	32801705	32863041	61337	+	ENSG00000100234	ENST00000266085	16967	TIMP3	TIMP metallopeptidase inhibitor 3 [Source:HGNC Symbol;Acc:HGNC:11822]
22	29267917	29268775	859	WT_un_S5_peak_5195	59	4.94817	5.94877	2.6174	389	Promoter (<=1kb)	29259872	29267981	8110	-	ENSG00000100263	ENST00000216085	0	RHBDD3	rhomboid domain containing 3 [Source:HGNC Symbol;Acc:HGNC:1308]
22	43014961	43015583	623	WT_un_S5_peak_5284	94	6.17518	9.43754	5.84042	198	Promoter (<=1kb)	42869773	43015149	145377	-	ENSG00000100266	ENST00000263246	0	PACSIN2	protein kinase C and casein kinase substrate in neurons 2 [Source:HGNC Symbol;Acc:HGNC:8571]
22	35299849	35300455	607	WT_un_S5_peak_5219	40	3.92167	4.07966	0.98433	188	Promoter (<=1kb)	35299856	35347973	48118	+	ENSG00000100284	ENST00000404284	0	TOM1	target of myb1 membrane trafficking protein [Source:HGNC Symbol;Acc:HGNC:11982]
22	35399854	35400122	269	WT_un_S5_peak_5220	44	3.90533	4.47362	1.30106	145	Promoter (<=1kb)	35400134	35403257	3124	+	ENSG00000100297	ENST00000451351	-12	MCM5	minichromosome maintenance complex component 5 [Source:HGNC Symbol;Acc:HGNC:6948]
22	39309636	39312783	3148	WT_un_S5_peak_5260a	73	5.54056	7.36442	3.92103	191	Promoter (<=1kb)	39312884	39313705	822	-	ENSG00000100316	ENST00000464182	922	RPL3	ribosomal protein L3 [Source:HGNC Symbol;Acc:HGNC:10332]
22	39309636	39312783	3148	WT_un_S5_peak_5260b	43	3.5241	4.31451	1.1925	1077	Promoter (<=1kb)	39312884	39313705	822	-	ENSG00000100316	ENST00000464182	922	RPL3	ribosomal protein L3 [Source:HGNC Symbol;Acc:HGNC:10332]
22	39309636	39312783	3148	WT_un_S5_peak_5260c	41	3.15842	4.14638	1.04025	1557	Promoter (<=1kb)	39312884	39313705	822	-	ENSG00000100316	ENST00000464182	922	RPL3	ribosomal protein L3 [Source:HGNC Symbol;Acc:HGNC:10332]
22	39309636	39312783	3148	WT_un_S5_peak_5260d	47	3.3295	4.79185	1.59279	2233	Promoter (<=1kb)	39312884	39313705	822	-	ENSG00000100316	ENST00000464182	922	RPL3	ribosomal protein L3 [Source:HGNC Symbol;Acc:HGNC:10332]
22	39309636	39312783	3148	WT_un_S5_peak_5260e	31	2.95791	3.1253	0.20805	2642	Promoter (<=1kb)	39312884	39313705	822	-	ENSG00000100316	ENST00000464182	922	RPL3	ribosomal protein L3 [Source:HGNC Symbol;Acc:HGNC:10332]
22	39313481	39313802	322	WT_un_S5_peak_5261	56	4.76702	5.69186	2.39319	130	Promoter (<=1kb)	39312884	39313705	822	-	ENSG00000100316	ENST00000464182	0	RPL3	ribosomal protein L3 [Source:HGNC Symbol;Acc:HGNC:10332]
22	39314173	39314776	604	WT_un_S5_peak_5262	40	3.87861	4.02122	0.94915	134	Promoter (<=1kb)	39312887	39314965	2079	-	ENSG00000100316	ENST00000467105	189	RPL3	ribosomal protein L3 [Source:HGNC Symbol;Acc:HGNC:10332]
22	39315425	39315693	269	WT_un_S5_peak_5263	23	2.78918	2.30424	0	41	Promoter (<=1kb)	39313931	39315486	1556	-	ENSG00000100316	ENST00000481985	0	RPL3	ribosomal protein L3 [Source:HGNC Symbol;Acc:HGNC:10332]
22	39317673	39318197	525	WT_un_S5_peak_5264	24	2.89517	2.43654	0	130	Promoter (<=1kb)	39312882	39318614	5733	-	ENSG00000100316	ENST00000401609	417	RPL3	ribosomal protein L3 [Source:HGNC Symbol;Acc:HGNC:10332]
22	39318726	39320367	1642	WT_un_S5_peak_5265	330	15.8975	33.0535	28.7216	889	Promoter (<=1kb)	39312882	39319623	6742	-	ENSG00000100316	ENST00000216146	0	RPL3	ribosomal protein L3 [Source:HGNC Symbol;Acc:HGNC:10332]
22	36327591	36330466	2876	WT_un_S5_peak_5221a	32	3.23733	3.22608	0.28631	251	Promoter (<=1kb)	36320274	36328952	8679	-	ENSG00000100345	ENST00000463027	0	MYH9	myosin heavy chain 9 [Source:HGNC Symbol;Acc:HGNC:7579]
22	36327591	36330466	2876	WT_un_S5_peak_5221b	79	5.6325	7.99793	4.48953	644	Promoter (<=1kb)	36320274	36328952	8679	-	ENSG00000100345	ENST00000463027	0	MYH9	myosin heavy chain 9 [Source:HGNC Symbol;Acc:HGNC:7579]
22	36327591	36330466	2876	WT_un_S5_peak_5221c	227	12.2397	22.7334	18.6211	1570	Promoter (<=1kb)	36320274	36328952	8679	-	ENSG00000100345	ENST00000463027	0	MYH9	myosin heavy chain 9 [Source:HGNC Symbol;Acc:HGNC:7579]
22	36327591	36330466	2876	WT_un_S5_peak_5221d	23	2.61444	2.34354	0	2689	Promoter (<=1kb)	36320274	36328952	8679	-	ENSG00000100345	ENST00000463027	0	MYH9	myosin heavy chain 9 [Source:HGNC Symbol;Acc:HGNC:7579]
22	36330714	36332666	1953	WT_un_S5_peak_5222a	40	3.5795	4.07966	0.98433	222	Promoter (1-2kb)	36320274	36328952	8679	-	ENSG00000100345	ENST00000463027	-1762	MYH9	myosin heavy chain 9 [Source:HGNC Symbol;Acc:HGNC:7579]
22	36330714	36332666	1953	WT_un_S5_peak_5222b	75	5.65553	7.50295	4.04628	487	Promoter (1-2kb)	36320274	36328952	8679	-	ENSG00000100345	ENST00000463027	-1762	MYH9	myosin heavy chain 9 [Source:HGNC Symbol;Acc:HGNC:7579]
22	36330714	36332666	1953	WT_un_S5_peak_5222c	58	4.21122	5.86499	2.55229	1150	Promoter (1-2kb)	36320274	36328952	8679	-	ENSG00000100345	ENST00000463027	-1762	MYH9	myosin heavy chain 9 [Source:HGNC Symbol;Acc:HGNC:7579]
22	36330714	36332666	1953	WT_un_S5_peak_5222d	38	3.7781	3.88541	0.82322	1671	Promoter (1-2kb)	36320274	36328952	8679	-	ENSG00000100345	ENST00000463027	-1762	MYH9	myosin heavy chain 9 [Source:HGNC Symbol;Acc:HGNC:7579]
22	36352556	36353026	471	WT_un_S5_peak_5223	58	4.55544	5.87154	2.5571	233	Intron (ENST00000216181/ENSG00000100345, intron 1 of 40)	36348928	36365111	16184	-	ENSG00000100345	ENST00000456729	12085	MYH9	myosin heavy chain 9 [Source:HGNC Symbol;Acc:HGNC:7579]
22	36362575	36362904	330	WT_un_S5_peak_5224	23	2.45954	2.30424	0	186	Promoter (2-3kb)	36348928	36365111	16184	-	ENSG00000100345	ENST00000456729	2207	MYH9	myosin heavy chain 9 [Source:HGNC Symbol;Acc:HGNC:7579]
22	36365000	36365416	417	WT_un_S5_peak_5225	36	3.07067	3.62443	0.59626	343	Promoter (<=1kb)	36325033	36365112	40080	-	ENSG00000100345	ENST00000401701	0	MYH9	myosin heavy chain 9 [Source:HGNC Symbol;Acc:HGNC:7579]
22	36370801	36371101	301	WT_un_S5_peak_5226	38	3.44846	3.88541	0.82322	212	Intron (ENST00000216181/ENSG00000100345, intron 1 of 40)	36325033	36365112	40080	-	ENSG00000100345	ENST00000401701	-5689	MYH9	myosin heavy chain 9 [Source:HGNC Symbol;Acc:HGNC:7579]
22	36372874	36373724	851	WT_un_S5_peak_5227	44	3.8578	4.40577	1.26815	99	Intron (ENST00000216181/ENSG00000100345, intron 1 of 40)	36325033	36365112	40080	-	ENSG00000100345	ENST00000401701	-7762	MYH9	myosin heavy chain 9 [Source:HGNC Symbol;Acc:HGNC:7579]
22	36374279	36376101	1823	WT_un_S5_peak_5228a	94	6.17518	9.43754	5.84042	487	Intron (ENST00000216181/ENSG00000100345, intron 1 of 40)	36325033	36365112	40080	-	ENSG00000100345	ENST00000401701	-9167	MYH9	myosin heavy chain 9 [Source:HGNC Symbol;Acc:HGNC:7579]
22	36374279	36376101	1823	WT_un_S5_peak_5228b	62	4.78655	6.20573	2.85569	1097	Intron (ENST00000216181/ENSG00000100345, intron 1 of 40)	36325033	36365112	40080	-	ENSG00000100345	ENST00000401701	-9167	MYH9	myosin heavy chain 9 [Source:HGNC Symbol;Acc:HGNC:7579]
22	36376424	36376863	440	WT_un_S5_peak_5229	26	2.79309	2.62211	0	78	Intron (ENST00000216181/ENSG00000100345, intron 1 of 40)	36281280	36387967	106688	-	ENSG00000100345	ENST00000216181	11104	MYH9	myosin heavy chain 9 [Source:HGNC Symbol;Acc:HGNC:7579]
22	36377590	36378666	1077	WT_un_S5_peak_5230	41	3.15842	4.14638	1.04025	265	Intron (ENST00000216181/ENSG00000100345, intron 1 of 40)	36281280	36387967	106688	-	ENSG00000100345	ENST00000216181	9301	MYH9	myosin heavy chain 9 [Source:HGNC Symbol;Acc:HGNC:7579]
22	36379024	36379535	512	WT_un_S5_peak_5231	35	2.6636	3.5627	0.55276	456	Intron (ENST00000216181/ENSG00000100345, intron 1 of 40)	36281280	36387967	106688	-	ENSG00000100345	ENST00000216181	8432	MYH9	myosin heavy chain 9 [Source:HGNC Symbol;Acc:HGNC:7579]
22	36379714	36380970	1257	WT_un_S5_peak_5232a	61	3.84275	6.17367	2.82454	346	Intron (ENST00000216181/ENSG00000100345, intron 1 of 40)	36281280	36387967	106688	-	ENSG00000100345	ENST00000216181	6997	MYH9	myosin heavy chain 9 [Source:HGNC Symbol;Acc:HGNC:7579]
22	36379714	36380970	1257	WT_un_S5_peak_5232b	38	3.43265	3.81524	0.77032	1079	Intron (ENST00000216181/ENSG00000100345, intron 1 of 40)	36281280	36387967	106688	-	ENSG00000100345	ENST00000216181	6997	MYH9	myosin heavy chain 9 [Source:HGNC Symbol;Acc:HGNC:7579]
22	36381262	36383526	2265	WT_un_S5_peak_5233a	65	4.6961	6.55207	3.16577	288	Intron (ENST00000216181/ENSG00000100345, intron 1 of 40)	36281280	36387967	106688	-	ENSG00000100345	ENST00000216181	4441	MYH9	myosin heavy chain 9 [Source:HGNC Symbol;Acc:HGNC:7579]
22	36381262	36383526	2265	WT_un_S5_peak_5233b	66	5.03788	6.63423	3.24457	746	Intron (ENST00000216181/ENSG00000100345, intron 1 of 40)	36281280	36387967	106688	-	ENSG00000100345	ENST00000216181	4441	MYH9	myosin heavy chain 9 [Source:HGNC Symbol;Acc:HGNC:7579]
22	36381262	36383526	2265	WT_un_S5_peak_5233c	75	4.89556	7.53305	4.06575	1302	Intron (ENST00000216181/ENSG00000100345, intron 1 of 40)	36281280	36387967	106688	-	ENSG00000100345	ENST00000216181	4441	MYH9	myosin heavy chain 9 [Source:HGNC Symbol;Acc:HGNC:7579]
22	36381262	36383526	2265	WT_un_S5_peak_5233d	86	5.35667	8.68165	5.12359	2044	Intron (ENST00000216181/ENSG00000100345, intron 1 of 40)	36281280	36387967	106688	-	ENSG00000100345	ENST00000216181	4441	MYH9	myosin heavy chain 9 [Source:HGNC Symbol;Acc:HGNC:7579]
22	36383738	36388246	4509	WT_un_S5_peak_5234a	25	2.38987	2.54672	0	167	Promoter (<=1kb)	36281280	36387967	106688	-	ENSG00000100345	ENST00000216181	0	MYH9	myosin heavy chain 9 [Source:HGNC Symbol;Acc:HGNC:7579]
22	36383738	36388246	4509	WT_un_S5_peak_5234b	94	5.83723	9.46509	5.86601	601	Promoter (<=1kb)	36281280	36387967	106688	-	ENSG00000100345	ENST00000216181	0	MYH9	myosin heavy chain 9 [Source:HGNC Symbol;Acc:HGNC:7579]
22	36383738	36388246	4509	WT_un_S5_peak_5234c	81	5.37125	8.17721	4.66188	1227	Promoter (<=1kb)	36281280	36387967	106688	-	ENSG00000100345	ENST00000216181	0	MYH9	myosin heavy chain 9 [Source:HGNC Symbol;Acc:HGNC:7579]
22	36383738	36388246	4509	WT_un_S5_peak_5234d	23	2.61444	2.34354	0	1563	Promoter (<=1kb)	36281280	36387967	106688	-	ENSG00000100345	ENST00000216181	0	MYH9	myosin heavy chain 9 [Source:HGNC Symbol;Acc:HGNC:7579]
22	36383738	36388246	4509	WT_un_S5_peak_5234e	102	6.26723	10.2741	6.62594	2335	Promoter (<=1kb)	36281280	36387967	106688	-	ENSG00000100345	ENST00000216181	0	MYH9	myosin heavy chain 9 [Source:HGNC Symbol;Acc:HGNC:7579]
22	36383738	36388246	4509	WT_un_S5_peak_5234f	143	7.65934	14.3782	10.5357	3326	Promoter (<=1kb)	36281280	36387967	106688	-	ENSG00000100345	ENST00000216181	0	MYH9	myosin heavy chain 9 [Source:HGNC Symbol;Acc:HGNC:7579]
22	36383738	36388246	4509	WT_un_S5_peak_5234g	380	13.7919	38.0296	33.6083	4143	Promoter (<=1kb)	36281280	36387967	106688	-	ENSG00000100345	ENST00000216181	0	MYH9	myosin heavy chain 9 [Source:HGNC Symbol;Acc:HGNC:7579]
22	36467745	36468548	804	WT_un_S5_peak_5237	25	2.76105	2.57922	0	296	3' UTR	36467591	36481340	13750	-	ENSG00000100348	ENST00000403313	12792	TXN2	thioredoxin 2 [Source:HGNC Symbol;Acc:HGNC:17772]
22	36481268	36482340	1073	WT_un_S5_peak_5238a	72	5.09525	7.22952	3.79179	349	Promoter (<=1kb)	36467046	36481634	14589	-	ENSG00000100348	ENST00000416967	0	TXN2	thioredoxin 2 [Source:HGNC Symbol;Acc:HGNC:17772]
22	36481268	36482340	1073	WT_un_S5_peak_5238b	92	5.70918	9.25729	5.67286	629	Promoter (<=1kb)	36467046	36481634	14589	-	ENSG00000100348	ENST00000416967	0	TXN2	thioredoxin 2 [Source:HGNC Symbol;Acc:HGNC:17772]
22	36528706	36529386	681	WT_un_S5_peak_5239	77	5.8315	7.78835	4.29985	483	Promoter (<=1kb)	36510855	36529166	18312	-	ENSG00000100353	ENST00000216190	0	EIF3D	eukaryotic translation initiation factor 3 subunit D [Source:HGNC Symbol;Acc:HGNC:3278]
22	40177804	40178145	342	WT_un_S5_peak_5273	86	6.3871	8.60744	5.05654	154	Promoter (<=1kb)	40177925	40246362	68438	+	ENSG00000100354	ENST00000489500	0	TNRC6B	trinucleotide repeat containing adaptor 6B [Source:HGNC Symbol;Acc:HGNC:29190]
22	45216832	45217100	269	WT_un_S5_peak_5287	24	2.553	2.43654	0	104	Intron (ENST00000336156/ENSG00000100364, intron 1 of 9)	45205223	45213499	8277	-	ENSG00000100364	ENST00000424508	-3333	KIAA0930	KIAA0930 [Source:HGNC Symbol;Acc:HGNC:1314]
22	36873764	36874032	269	WT_un_S5_peak_5240	23	2.86338	2.39668	0	221	Promoter (1-2kb)	36872137	36877764	5628	+	ENSG00000100365	ENST00000415063	1627	NCF4	neutrophil cytosolic factor 4 [Source:HGNC Symbol;Acc:HGNC:7662]
22	40856323	40856720	398	WT_un_S5_peak_5275	32	3.23733	3.22608	0.28631	140	Promoter (<=1kb)	40824535	40856639	32105	-	ENSG00000100380	ENST00000216218	0	ST13	ST13 Hsp70 interacting protein [Source:HGNC Symbol;Acc:HGNC:11343]
22	40951165	40951596	432	WT_un_S5_peak_5276	75	4.66745	7.53305	4.06575	228	Promoter (<=1kb)	40951347	40964411	13065	+	ENSG00000100387	ENST00000476110	0	RBX1	ring-box 1 [Source:HGNC Symbol;Acc:HGNC:9928]
22	41285896	41286313	418	WT_un_S5_peak_5277	73	5.22326	7.36442	3.92103	277	Promoter (<=1kb)	41244779	41286187	41409	-	ENSG00000100401	ENST00000356244	0	RANGAP1	Ran GTPase activating protein 1 [Source:HGNC Symbol;Acc:HGNC:9854]
22	46335513	46335842	330	WT_un_S5_peak_5291	47	4.10774	4.76379	1.57115	241	Promoter (<=1kb)	46335689	46338211	2523	+	ENSG00000100416	ENST00000493556	0	TRMU	tRNA mitochondrial 2-thiouridylase [Source:HGNC Symbol;Acc:HGNC:25481]
14	24431951	24432345	395	WT_un_S5_peak_2551	23	2.61444	2.34354	0	218	Promoter (<=1kb)	24432794	24437425	4632	+	ENSG00000100441	ENST00000554268	-449	KHNYN	KH and NYN domain containing [Source:HGNC Symbol;Acc:HGNC:20166]
14	24437274	24437542	269	WT_un_S5_peak_2552	35	3.46081	3.53919	0.53357	154	Promoter (1-2kb)	24435457	24438408	2952	+	ENSG00000100441	ENST00000556255	1817	KHNYN	KH and NYN domain containing [Source:HGNC Symbol;Acc:HGNC:20166]
14	45134065	45134493	429	WT_un_S5_peak_2574	23	2.78918	2.30424	0	127	Promoter (<=1kb)	45115599	45134481	18883	-	ENSG00000100442	ENST00000396062	0	FKBP3	FKBP prolyl isomerase 3 [Source:HGNC Symbol;Acc:HGNC:3719]
14	24438108	24438613	506	WT_un_S5_peak_2553	24	2.89517	2.43654	0	276	Promoter (2-3kb)	24440101	24440926	826	-	ENSG00000100445	ENST00000555561	2313	SDR39U1	short chain dehydrogenase/reductase family 39U member 1 [Source:HGNC Symbol;Acc:HGNC:20275]
14	24439954	24440498	545	WT_un_S5_peak_2554	26	3.09502	2.69119	0	183	Promoter (<=1kb)	24440101	24440926	826	-	ENSG00000100445	ENST00000555561	428	SDR39U1	short chain dehydrogenase/reductase family 39U member 1 [Source:HGNC Symbol;Acc:HGNC:20275]
14	24441967	24443224	1258	WT_un_S5_peak_2555a	38	3.7781	3.88541	0.82322	117	Promoter (<=1kb)	24439766	24442776	3011	-	ENSG00000100445	ENST00000399395	0	SDR39U1	short chain dehydrogenase/reductase family 39U member 1 [Source:HGNC Symbol;Acc:HGNC:20275]
14	24441967	24443224	1258	WT_un_S5_peak_2555b	56	4.76702	5.69186	2.39319	563	Promoter (<=1kb)	24439766	24442776	3011	-	ENSG00000100445	ENST00000399395	0	SDR39U1	short chain dehydrogenase/reductase family 39U member 1 [Source:HGNC Symbol;Acc:HGNC:20275]
14	24441967	24443224	1258	WT_un_S5_peak_2555c	59	4.94817	5.94877	2.6174	855	Promoter (<=1kb)	24439766	24442776	3011	-	ENSG00000100445	ENST00000399395	0	SDR39U1	short chain dehydrogenase/reductase family 39U member 1 [Source:HGNC Symbol;Acc:HGNC:20275]
14	22918902	22919576	675	WT_un_S5_peak_2535	54	4.26726	5.43925	2.16645	244	Promoter (<=1kb)	22893204	22919149	25946	-	ENSG00000100461	ENST00000359890	0	RBM23	RNA binding motif protein 23 [Source:HGNC Symbol;Acc:HGNC:20155]
14	22929216	22929562	347	WT_un_S5_peak_2536	26	2.82589	2.66609	0	172	Promoter (<=1kb)	22920525	22929401	8877	-	ENSG00000100462	ENST00000397441	0	PRMT5	protein arginine methyltransferase 5 [Source:HGNC Symbol;Acc:HGNC:10894]
14	31026106	31026847	742	WT_un_S5_peak_2560	38	3.7781	3.88541	0.82322	176	Promoter (<=1kb)	31026643	31093117	66475	+	ENSG00000100478	ENST00000555417	0	AP4S1	adaptor related protein complex 4 subunit sigma 1 [Source:HGNC Symbol;Acc:HGNC:575]
14	50116276	50116875	600	WT_un_S5_peak_2581	49	4.26383	4.98931	1.76911	346	Promoter (<=1kb)	50108632	50116477	7846	-	ENSG00000100483	ENST00000569518	0	VCPKMT	valosin containing protein lysine methyltransferase [Source:HGNC Symbol;Acc:HGNC:20352]
14	50396594	50397335	742	WT_un_S5_peak_2583	32	3.23733	3.22608	0.28631	114	Promoter (<=1kb)	50326265	50396881	70617	-	ENSG00000100490	ENST00000395834	0	CDKL1	cyclin dependent kinase like 1 [Source:HGNC Symbol;Acc:HGNC:1781]
14	50936005	50936522	518	WT_un_S5_peak_2585	26	2.72923	2.69119	0	112	Intron (ENST00000532462/ENSG00000100504, intron 2 of 19)	50857891	50944456	86566	-	ENSG00000100504	ENST00000532462	7934	PYGL	glycogen phosphorylase L [Source:HGNC Symbol;Acc:HGNC:9725]
14	50944205	50944545	341	WT_un_S5_peak_2586	50	3.98311	5.08049	1.8432	149	Promoter (<=1kb)	50857891	50944456	86566	-	ENSG00000100504	ENST00000532462	0	PYGL	glycogen phosphorylase L [Source:HGNC Symbol;Acc:HGNC:9725]
14	52706865	52707272	408	WT_un_S5_peak_2599	54	4.55817	5.42044	2.14934	169	Promoter (<=1kb)	52707178	52709089	1912	+	ENSG00000100519	ENST00000555887	0	PSMC6	proteasome 26S subunit, ATPase 6 [Source:HGNC Symbol;Acc:HGNC:9553]
14	54396862	54397326	465	WT_un_S5_peak_2602	46	4.03504	4.66421	1.48129	160	Promoter (<=1kb)	54396955	54420214	23260	+	ENSG00000100526	ENST00000611205	0	CDKN3	cyclin dependent kinase inhibitor 3 [Source:HGNC Symbol;Acc:HGNC:1791]
14	67359450	67360673	1224	WT_un_S5_peak_2643a	125	7.6855	12.5229	8.75637	319	Promoter (<=1kb)	67294371	67359791	65421	-	ENSG00000100554	ENST00000554087	0	ATP6V1D	ATPase H+ transporting V1 subunit D [Source:HGNC Symbol;Acc:HGNC:13527]
14	67359450	67360673	1224	WT_un_S5_peak_2643b	97	6.75288	9.74924	6.13049	969	Promoter (<=1kb)	67294371	67359791	65421	-	ENSG00000100554	ENST00000554087	0	ATP6V1D	ATPase H+ transporting V1 subunit D [Source:HGNC Symbol;Acc:HGNC:13527]
14	58244648	58244970	323	WT_un_S5_peak_2618	30	3.07892	3.00838	0.11344	127	Promoter (<=1kb)	58244843	58272004	27162	+	ENSG00000100567	ENST00000216455	0	PSMA3	proteasome 20S subunit alpha 3 [Source:HGNC Symbol;Acc:HGNC:9532]
14	77457901	77458169	269	WT_un_S5_peak_2689	40	3.63653	4.09083	0.99096	198	Promoter (<=1kb)	77458032	77468760	10729	+	ENSG00000100591	ENST00000535854	0	AHSA1	activator of HSP90 ATPase activity 1 [Source:HGNC Symbol;Acc:HGNC:1189]
14	59188596	59189112	517	WT_un_S5_peak_2621	79	5.97467	7.99793	4.48953	213	Promoter (<=1kb)	59188646	59266161	77516	+	ENSG00000100592	ENST00000556596	0	DAAM1	dishevelled associated activator of morphogenesis 1 [Source:HGNC Symbol;Acc:HGNC:18142]
14	59189525	59190072	548	WT_un_S5_peak_2622	58	4.51201	5.8007	2.49471	130	Promoter (<=1kb)	59188699	59291508	102810	+	ENSG00000100592	ENST00000556135	826	DAAM1	dishevelled associated activator of morphogenesis 1 [Source:HGNC Symbol;Acc:HGNC:18142]
14	59308964	59309232	269	WT_un_S5_peak_2623	40	3.5795	4.07966	0.98433	104	Intron (ENST00000360909/ENSG00000100592, intron 3 of 24)	59299715	59323057	23343	+	ENSG00000100592	ENST00000557327	9249	DAAM1	dishevelled associated activator of morphogenesis 1 [Source:HGNC Symbol;Acc:HGNC:18142]
14	77616467	77616962	496	WT_un_S5_peak_2690	43	3.73916	4.31906	1.1948	351	Promoter (<=1kb)	77505997	77616637	110641	-	ENSG00000100596	ENST00000216484	0	SPTLC2	serine palmitoyltransferase long chain base subunit 2 [Source:HGNC Symbol;Acc:HGNC:11278]
14	92748330	92748772	443	WT_un_S5_peak_2721	69	4.97505	6.98198	3.55461	222	Promoter (<=1kb)	92703807	92748612	44806	-	ENSG00000100600	ENST00000555699	0	LGMN	legumain [Source:HGNC Symbol;Acc:HGNC:9472]
14	77707835	77708296	462	WT_un_S5_peak_2691	23	2.78918	2.30424	0	317	Promoter (<=1kb)	77672404	77708023	35620	-	ENSG00000100601	ENST00000216489	0	ALKBH1	alkB homolog 1, histone H2A dioxygenase [Source:HGNC Symbol;Acc:HGNC:17911]
14	92981065	92981333	269	WT_un_S5_peak_2723	40	3.5795	4.07966	0.98433	136	Intron (ENST00000354313/ENSG00000100605, intron 5 of 10)	92946459	92998939	52481	-	ENSG00000100605	ENST00000553695	17606	ITPK1	inositol-tetrakisphosphate 1-kinase [Source:HGNC Symbol;Acc:HGNC:6177]
14	93941654	93941922	269	WT_un_S5_peak_2725	40	3.5402	4.02122	0.94915	180	Promoter (1-2kb)	93934167	93940495	6329	-	ENSG00000100628	ENST00000553883	-1159	ASB2	ankyrin repeat and SOCS box containing 2 [Source:HGNC Symbol;Acc:HGNC:16012]
14	80941490	80941934	445	WT_un_S5_peak_2695	86	6.02131	8.60744	5.05654	226	Promoter (<=1kb)	80496479	80941738	445260	-	ENSG00000100629	ENST00000555265	0	CEP128	centrosomal protein 128 [Source:HGNC Symbol;Acc:HGNC:20359]
14	61695362	61696255	894	WT_un_S5_peak_2631	140	8.01393	14.0417	10.2081	282	Promoter (<=1kb)	61695513	61721824	26312	+	ENSG00000100644	ENST00000557446	0	HIF1A	hypoxia inducible factor 1 subunit alpha [Source:HGNC Symbol;Acc:HGNC:4910]
14	69766774	69767943	1170	WT_un_S5_peak_2661a	255	13.337	25.5968	21.4114	422	Promoter (<=1kb)	69767093	69771973	4881	+	ENSG00000100650	ENST00000394366	0	SRSF5	serine and arginine rich splicing factor 5 [Source:HGNC Symbol;Acc:HGNC:10787]
14	69766774	69767943	1170	WT_un_S5_peak_2661b	109	7.11867	10.9254	7.24635	871	Promoter (<=1kb)	69767093	69771973	4881	+	ENSG00000100650	ENST00000394366	0	SRSF5	serine and arginine rich splicing factor 5 [Source:HGNC Symbol;Acc:HGNC:10787]
14	69771985	69772773	789	WT_un_S5_peak_2662	35	3.46081	3.53919	0.53357	737	Promoter (1-2kb)	69770881	69771915	1035	+	ENSG00000100650	ENST00000554929	1104	SRSF5	serine and arginine rich splicing factor 5 [Source:HGNC Symbol;Acc:HGNC:10787]
14	69773039	69773527	489	WT_un_S5_peak_2663	54	4.55817	5.42044	2.14934	178	Promoter (2-3kb)	69770881	69771915	1035	+	ENSG00000100650	ENST00000554929	2158	SRSF5	serine and arginine rich splicing factor 5 [Source:HGNC Symbol;Acc:HGNC:10787]
14	69779600	69779879	280	WT_un_S5_peak_2664	24	2.89517	2.43654	0	136	Intron (ENST00000216540/ENSG00000100652, intron 2 of 4)	69770881	69771915	1035	+	ENSG00000100650	ENST00000554929	8719	SRSF5	serine and arginine rich splicing factor 5 [Source:HGNC Symbol;Acc:HGNC:10787]
14	103333725	103334710	986	WT_un_S5_peak_2744	179	9.91282	17.991	14.0137	543	Promoter (<=1kb)	103334189	103336178	1990	+	ENSG00000100664	ENST00000559249	0	EIF5	eukaryotic translation initiation factor 5 [Source:HGNC Symbol;Acc:HGNC:3299]
14	103339981	103340391	411	WT_un_S5_peak_2745	38	3.44846	3.88541	0.82322	166	Promoter (<=1kb)	103340404	103341356	953	+	ENSG00000100664	ENST00000558800	-13	EIF5	eukaryotic translation initiation factor 5 [Source:HGNC Symbol;Acc:HGNC:3299]
14	64387671	64388347	677	WT_un_S5_peak_2636	68	4.85958	6.80413	3.39456	302	Promoter (<=1kb)	64388031	64463457	75427	+	ENSG00000100714	ENST00000545908	0	MTHFD1	methylenetetrahydrofolate dehydrogenase, cyclohydrolase and formyltetrahydrofolate synthetase 1 [Source:HGNC Symbol;Acc:HGNC:7432]
14	96797288	96797736	449	WT_un_S5_peak_2730	56	4.43738	5.69186	2.39319	148	Promoter (<=1kb)	96797304	96881612	84309	+	ENSG00000100749	ENST00000553683	0	VRK1	VRK serine/threonine kinase 1 [Source:HGNC Symbol;Acc:HGNC:12718]
14	91060279	91060810	532	WT_un_S5_peak_2717	97	5.52792	9.77246	6.15248	193	Promoter (<=1kb)	90847861	91060641	212781	-	ENSG00000100784	ENST00000614987	0	RPS6KA5	ribosomal protein S6 kinase A5 [Source:HGNC Symbol;Acc:HGNC:10434]
14	91510432	91510925	494	WT_un_S5_peak_2718	68	4.83308	6.82947	3.41799	272	Promoter (<=1kb)	91458139	91510478	52340	-	ENSG00000100796	ENST00000555462	0	PPP4R3A	protein phosphatase 4 regulatory subunit 3A [Source:HGNC Symbol;Acc:HGNC:20219]
14	23071179	23071659	481	WT_un_S5_peak_2539	38	3.44846	3.88541	0.82322	215	Promoter (<=1kb)	23058564	23071565	13002	-	ENSG00000100813	ENST00000557515	0	ACIN1	apoptotic chromatin condensation inducer 1 [Source:HGNC Symbol;Acc:HGNC:17066]
14	23094936	23095797	862	WT_un_S5_peak_2540a	24	2.47408	2.41987	0	210	Promoter (<=1kb)	23058564	23095136	36573	-	ENSG00000100813	ENST00000605057	0	ACIN1	apoptotic chromatin condensation inducer 1 [Source:HGNC Symbol;Acc:HGNC:17066]
14	23094936	23095797	862	WT_un_S5_peak_2540b	23	2.61444	2.34354	0	667	Promoter (<=1kb)	23058564	23095136	36573	-	ENSG00000100813	ENST00000605057	0	ACIN1	apoptotic chromatin condensation inducer 1 [Source:HGNC Symbol;Acc:HGNC:17066]
14	20333013	20333526	514	WT_un_S5_peak_2508	40	3.92167	4.07966	0.98433	268	Promoter (<=1kb)	20311368	20333312	21945	-	ENSG00000100814	ENST00000353689	0	CCNB1IP1	cyclin B1 interacting protein 1 [Source:HGNC Symbol;Acc:HGNC:19437]
14	92039745	92040327	583	WT_un_S5_peak_2719	81	5.72292	8.13883	4.62628	383	Promoter (<=1kb)	91965991	92040059	74069	-	ENSG00000100815	ENST00000267622	0	TRIP11	thyroid hormone receptor interactor 11 [Source:HGNC Symbol;Acc:HGNC:12305]
14	102362825	102363325	501	WT_un_S5_peak_2743	23	2.38633	2.34354	0	85	Promoter (<=1kb)	102341102	102362916	21815	-	ENSG00000100865	ENST00000559514	0	CINP	cyclin dependent kinase 2 interacting protein [Source:HGNC Symbol;Acc:HGNC:23789]
14	34982729	34983153	425	WT_un_S5_peak_2566	23	2.61444	2.34354	0	173	Promoter (<=1kb)	34982963	35023281	40319	+	ENSG00000100883	ENST00000677561	0	SRP54	signal recognition particle 54 [Source:HGNC Symbol;Acc:HGNC:11301]
14	24141271	24141764	494	WT_un_S5_peak_2543	24	2.89517	2.43654	0	311	Promoter (<=1kb)	24138965	24141570	2606	-	ENSG00000100908	ENST00000560403	0	EMC9	ER membrane protein complex subunit 9 [Source:HGNC Symbol;Acc:HGNC:20273]
14	35826290	35826697	408	WT_un_S5_peak_2569	50	3.755	5.08049	1.8432	154	Promoter (<=1kb)	35826338	35871963	45626	+	ENSG00000100916	ENST00000216807	0	BRMS1L	BRMS1 like transcriptional repressor [Source:HGNC Symbol;Acc:HGNC:20512]
14	24177571	24177839	269	WT_un_S5_peak_2545	42	3.72192	4.21222	1.09996	158	Promoter (<=1kb)	24177510	24178100	591	+	ENSG00000100918	ENST00000560823	61	REC8	REC8 meiotic recombination protein [Source:HGNC Symbol;Acc:HGNC:16879]
14	39175043	39175574	532	WT_un_S5_peak_2571	107	6.5548	10.7319	7.06728	200	Promoter (<=1kb)	39175183	39179246	4064	+	ENSG00000100941	ENST00000553331	0	PNN	pinin, desmosome associated protein [Source:HGNC Symbol;Acc:HGNC:9162]
20	45934516	45935021	506	WT_un_S5_peak_4973	148	6.00504	14.8183	10.952	276	Promoter (<=1kb)	45934683	45948020	13338	+	ENSG00000100982	ENST00000372409	0	PCIF1	phosphorylated CTD interacting factor 1 [Source:HGNC Symbol;Acc:HGNC:16200]
20	34955457	34955725	269	WT_un_S5_peak_4906	29	2.82615	2.94099	0.06335	139	Promoter (<=1kb)	34928473	34955643	27171	-	ENSG00000100983	ENST00000645723	0	GSS	glutathione synthetase [Source:HGNC Symbol;Acc:HGNC:4624]
20	35092565	35093028	464	WT_un_S5_peak_4907	61	3.84275	6.17367	2.82454	272	Promoter (<=1kb)	35002404	35092807	90404	-	ENSG00000100991	ENST00000252015	0	TRPC4AP	transient receptor potential cation channel subfamily C member 4 associated protein [Source:HGNC Symbol;Acc:HGNC:16181]
20	25247919	25248239	321	WT_un_S5_peak_4883	23	2.61444	2.34354	0	79	Promoter (<=1kb)	25248085	25298012	49928	+	ENSG00000100994	ENST00000216962	0	PYGB	glycogen phosphorylase B [Source:HGNC Symbol;Acc:HGNC:9723]
20	25390689	25391056	368	WT_un_S5_peak_4884	35	2.81625	3.53412	0.53357	272	Promoter (<=1kb)	25294743	25390835	96093	-	ENSG00000100997	ENST00000376542	0	ABHD12	abhydrolase domain containing 12, lysophospholipase [Source:HGNC Symbol;Acc:HGNC:15868]
20	25407530	25408034	505	WT_un_S5_peak_4885	105	5.98784	10.5549	6.89995	266	Promoter (<=1kb)	25407673	25448563	40891	+	ENSG00000101003	ENST00000262460	0	GINS1	GINS complex subunit 1 [Source:HGNC Symbol;Acc:HGNC:28980]
20	35305326	35307174	1849	WT_un_S5_peak_4910a	92	5.70918	9.25729	5.67286	398	Promoter (<=1kb)	35302566	35307082	4517	-	ENSG00000101019	ENST00000472559	0	UQCC1	ubiquinol-cytochrome c reductase complex assembly factor 1 [Source:HGNC Symbol;Acc:HGNC:15891]
20	35305326	35307174	1849	WT_un_S5_peak_4910b	65	4.98138	6.55207	3.16577	890	Promoter (<=1kb)	35302566	35307082	4517	-	ENSG00000101019	ENST00000472559	0	UQCC1	ubiquinol-cytochrome c reductase complex assembly factor 1 [Source:HGNC Symbol;Acc:HGNC:15891]
20	35305326	35307174	1849	WT_un_S5_peak_4910c	50	3.755	5.08049	1.8432	1646	Promoter (<=1kb)	35302566	35307082	4517	-	ENSG00000101019	ENST00000472559	0	UQCC1	ubiquinol-cytochrome c reductase complex assembly factor 1 [Source:HGNC Symbol;Acc:HGNC:15891]
20	36605515	36605854	340	WT_un_S5_peak_4926	35	2.6636	3.5627	0.55276	250	Promoter (<=1kb)	36605779	36612557	6779	+	ENSG00000101084	ENST00000344795	0	RAB5IF	RAB5 interacting factor [Source:HGNC Symbol;Acc:HGNC:15870]
20	51562309	51563053	745	WT_un_S5_peak_4999a	53	4.14476	5.32254	2.06685	247	Promoter (<=1kb)	51388626	51562831	174206	-	ENSG00000101096	ENST00000609943	0	NFATC2	nuclear factor of activated T cells 2 [Source:HGNC Symbol;Acc:HGNC:7776]
20	51562309	51563053	745	WT_un_S5_peak_4999b	35	2.81625	3.53412	0.53357	567	Promoter (<=1kb)	51388626	51562831	174206	-	ENSG00000101096	ENST00000609943	0	NFATC2	nuclear factor of activated T cells 2 [Source:HGNC Symbol;Acc:HGNC:7776]
20	44966227	44966579	353	WT_un_S5_peak_4958	29	2.84256	2.9599	0.06978	84	Promoter (<=1kb)	44966479	45079948	113470	+	ENSG00000101109	ENST00000499879	0	STK4	serine/threonine kinase 4 [Source:HGNC Symbol;Acc:HGNC:11408]
20	57351132	57351428	297	WT_un_S5_peak_5016	32	3.07259	3.28916	0.34417	154	Promoter (<=1kb)	57351223	57379211	27989	+	ENSG00000101146	ENST00000371242	0	RAE1	ribonucleic acid export 1 [Source:HGNC Symbol;Acc:HGNC:9828]
20	63864970	63865428	459	WT_un_S5_peak_5036	23	2.43529	2.37022	0	178	Promoter (<=1kb)	63865228	63891545	26318	+	ENSG00000101150	ENST00000611972	0	TPD52L2	TPD52 like 2 [Source:HGNC Symbol;Acc:HGNC:12007]
20	63980992	63981315	324	WT_un_S5_peak_5037	57	4.18043	5.75187	2.45199	164	Promoter (<=1kb)	63981132	64033100	51969	+	ENSG00000101161	ENST00000266079	0	PRPF6	pre-mRNA processing factor 6 [Source:HGNC Symbol;Acc:HGNC:15860]
20	59043949	59044241	293	WT_un_S5_peak_5025	34	3.42992	3.49544	0.52126	154	Promoter (1-2kb)	59038134	59042809	4676	-	ENSG00000101166	ENST00000466051	-1140	PRELID3B	PRELI domain containing 3B [Source:HGNC Symbol;Acc:HGNC:15892]
20	62182663	62183177	515	WT_un_S5_peak_5032	59	4.57128	5.95321	2.61777	345	Promoter (<=1kb)	62183028	62203568	20541	+	ENSG00000101181	ENST00000370823	0	MTG2	mitochondrial ribosome associated GTPase 2 [Source:HGNC Symbol;Acc:HGNC:16239]
20	62137515	62137783	269	WT_un_S5_peak_5031	54	4.55817	5.42044	2.14934	123	Promoter (1-2kb)	62136907	62139396	2490	-	ENSG00000101182	ENST00000486193	1613	PSMA7	proteasome 20S subunit alpha 7 [Source:HGNC Symbol;Acc:HGNC:9536]
20	3767797	3768151	355	WT_un_S5_peak_4818	50	3.98311	5.08049	1.8432	176	Promoter (<=1kb)	3753508	3767781	14274	-	ENSG00000101220	ENST00000399672	-16	C20orf27	chromosome 20 open reading frame 27 [Source:HGNC Symbol;Acc:HGNC:15873]
20	3796107	3796375	269	WT_un_S5_peak_4819	26	2.63794	2.66487	0	142	Promoter (<=1kb)	3796291	3806115	9825	+	ENSG00000101224	ENST00000439880	0	CDC25B	cell division cycle 25B [Source:HGNC Symbol;Acc:HGNC:1726]
20	543481	543964	484	WT_un_S5_peak_4796	63	4.88001	6.37088	3.01363	269	Promoter (<=1kb)	472498	543790	71293	-	ENSG00000101266	ENST00000217244	0	CSNK2A1	casein kinase 2 alpha 1 [Source:HGNC Symbol;Acc:HGNC:2457]
20	18507453	18508022	570	WT_un_S5_peak_4864a	41	3.15842	4.14638	1.04025	142	Promoter (<=1kb)	18507520	18561415	53896	+	ENSG00000101310	ENST00000336714	0	SEC23B	SEC23 homolog B, COPII coat complex component [Source:HGNC Symbol;Acc:HGNC:10702]
20	18507453	18508022	570	WT_un_S5_peak_4864b	43	3.5241	4.31451	1.1925	415	Promoter (<=1kb)	18507520	18561415	53896	+	ENSG00000101310	ENST00000336714	0	SEC23B	SEC23 homolog B, COPII coat complex component [Source:HGNC Symbol;Acc:HGNC:10702]
20	9051710	9052046	337	WT_un_S5_peak_4833	44	3.59816	4.42632	1.28046	154	Distal Intergenic	9068763	9339007	270245	+	ENSG00000101333	ENST00000407043	-16717	PLCB4	phospholipase C beta 4 [Source:HGNC Symbol;Acc:HGNC:9059]
20	9052210	9052603	394	WT_un_S5_peak_4834	23	2.55582	2.30586	0	93	Distal Intergenic	9068763	9339007	270245	+	ENSG00000101333	ENST00000407043	-16160	PLCB4	phospholipase C beta 4 [Source:HGNC Symbol;Acc:HGNC:9059]
20	9053340	9053793	454	WT_un_S5_peak_4835	29	3.09609	2.979	0.08711	114	Distal Intergenic	9068763	9339007	270245	+	ENSG00000101333	ENST00000407043	-14970	PLCB4	phospholipase C beta 4 [Source:HGNC Symbol;Acc:HGNC:9059]
20	9067582	9071138	3557	WT_un_S5_peak_4836a	297	12.8254	29.7396	25.4783	492	Promoter (<=1kb)	9068763	9339007	270245	+	ENSG00000101333	ENST00000407043	0	PLCB4	phospholipase C beta 4 [Source:HGNC Symbol;Acc:HGNC:9059]
20	9067582	9071138	3557	WT_un_S5_peak_4836b	247	9.0682	24.7721	20.6114	909	Promoter (<=1kb)	9068763	9339007	270245	+	ENSG00000101333	ENST00000407043	0	PLCB4	phospholipase C beta 4 [Source:HGNC Symbol;Acc:HGNC:9059]
20	9067582	9071138	3557	WT_un_S5_peak_4836c	59	2.84844	5.931	2.61503	1562	Promoter (<=1kb)	9068763	9339007	270245	+	ENSG00000101333	ENST00000407043	0	PLCB4	phospholipase C beta 4 [Source:HGNC Symbol;Acc:HGNC:9059]
20	9067582	9071138	3557	WT_un_S5_peak_4836d	105	4.93981	10.5371	6.88261	1963	Promoter (<=1kb)	9068763	9339007	270245	+	ENSG00000101333	ENST00000407043	0	PLCB4	phospholipase C beta 4 [Source:HGNC Symbol;Acc:HGNC:9059]
20	9067582	9071138	3557	WT_un_S5_peak_4836e	80	5.3136	8.08624	4.57532	2720	Promoter (<=1kb)	9068763	9339007	270245	+	ENSG00000101333	ENST00000407043	0	PLCB4	phospholipase C beta 4 [Source:HGNC Symbol;Acc:HGNC:9059]
20	9067582	9071138	3557	WT_un_S5_peak_4836f	71	5.04056	7.1463	3.7138	3027	Promoter (<=1kb)	9068763	9339007	270245	+	ENSG00000101333	ENST00000407043	0	PLCB4	phospholipase C beta 4 [Source:HGNC Symbol;Acc:HGNC:9059]
20	9072299	9073343	1045	WT_un_S5_peak_4837a	45	3.94843	4.54278	1.36717	449	Intron (ENST00000407043/ENSG00000101333, intron 1 of 6)	9069101	9338912	269812	+	ENSG00000101333	ENST00000437503	3198	PLCB4	phospholipase C beta 4 [Source:HGNC Symbol;Acc:HGNC:9059]
20	9072299	9073343	1045	WT_un_S5_peak_4837b	36	3.29623	3.60754	0.59386	961	Intron (ENST00000407043/ENSG00000101333, intron 1 of 6)	9069101	9338912	269812	+	ENSG00000101333	ENST00000437503	3198	PLCB4	phospholipase C beta 4 [Source:HGNC Symbol;Acc:HGNC:9059]
20	9074407	9075029	623	WT_un_S5_peak_4838	30	3.07892	3.00838	0.11344	51	Intron (ENST00000407043/ENSG00000101333, intron 1 of 6)	9069101	9338912	269812	+	ENSG00000101333	ENST00000437503	5306	PLCB4	phospholipase C beta 4 [Source:HGNC Symbol;Acc:HGNC:9059]
20	9200566	9200887	322	WT_un_S5_peak_4839	38	3.72977	3.82039	0.77264	186	Intron (ENST00000407043/ENSG00000101333, intron 2 of 6)	9217390	9480813	263424	+	ENSG00000101333	ENST00000278655	-16503	PLCB4	phospholipase C beta 4 [Source:HGNC Symbol;Acc:HGNC:9059]
20	36550270	36550851	582	WT_un_S5_peak_4925a	29	2.64517	2.95763	0.06978	90	3' UTR	36541519	36551447	9929	+	ENSG00000101335	ENST00000279022	8751	MYL9	myosin light chain 9 [Source:HGNC Symbol;Acc:HGNC:15754]
20	36550270	36550851	582	WT_un_S5_peak_4925b	27	2.72161	2.7874	0	446	3' UTR	36541519	36551447	9929	+	ENSG00000101335	ENST00000279022	8751	MYL9	myosin light chain 9 [Source:HGNC Symbol;Acc:HGNC:15754]
20	32109492	32110043	552	WT_un_S5_peak_4899	74	5.20826	7.40118	3.95732	234	Promoter (<=1kb)	32109714	32167256	57543	+	ENSG00000101337	ENST00000398022	0	TM9SF4	transmembrane 9 superfamily member 4 [Source:HGNC Symbol;Acc:HGNC:30797]
20	9847627	9848088	462	WT_un_S5_peak_4841	32	3.2893	3.29821	0.35013	124	Intron (ENST00000656748/ENSG00000286470, intron 2 of 2)	9537370	9839076	301707	-	ENSG00000101349	ENST00000353224	-8551	PAK5	p21 (RAC1) activated kinase 5 [Source:HGNC Symbol;Acc:HGNC:15916]
20	37179198	37179652	455	WT_un_S5_peak_4931	35	2.81625	3.53412	0.53357	280	Promoter (<=1kb)	37101226	37179548	78323	-	ENSG00000101353	ENST00000343811	0	MROH8	maestro heat like repeat family member 8 [Source:HGNC Symbol;Acc:HGNC:16125]
20	2652161	2652992	832	WT_un_S5_peak_4812	367	13.5638	36.7173	32.3181	512	Promoter (<=1kb)	2652593	2658039	5447	+	ENSG00000101361	ENST00000651302	0	NOP56	NOP56 ribonucleoprotein [Source:HGNC Symbol;Acc:HGNC:15911]
20	2656668	2657612	945	WT_un_S5_peak_4813	50	3.98311	5.08049	1.8432	742	Promoter (<=1kb)	2656949	2658393	1445	+	ENSG00000101361	ENST00000467857	0	NOP56	NOP56 ribonucleoprotein [Source:HGNC Symbol;Acc:HGNC:15911]
20	37289411	37290189	779	WT_un_S5_peak_4932	181	8.92991	18.1476	14.1692	322	Promoter (<=1kb)	37289649	37316639	26991	+	ENSG00000101363	ENST00000397150	0	MANBAL	mannosidase beta like [Source:HGNC Symbol;Acc:HGNC:15799]
20	2658008	2658911	904	WT_un_S5_peak_4814a	62	4.78655	6.20573	2.85569	221	Promoter (1-2kb)	2659283	2659916	634	-	ENSG00000101365	ENST00000466999	1005	IDH3B	isocitrate dehydrogenase (NAD(+)) 3 non-catalytic subunit beta [Source:HGNC Symbol;Acc:HGNC:5385]
20	2658008	2658911	904	WT_un_S5_peak_4814b	54	4.27134	5.44039	2.16645	717	Promoter (1-2kb)	2659283	2659916	634	-	ENSG00000101365	ENST00000466999	1005	IDH3B	isocitrate dehydrogenase (NAD(+)) 3 non-catalytic subunit beta [Source:HGNC Symbol;Acc:HGNC:5385]
20	2659066	2659340	275	WT_un_S5_peak_4815	38	3.7781	3.88541	0.82322	139	Promoter (<=1kb)	2659283	2659916	634	-	ENSG00000101365	ENST00000466999	576	IDH3B	isocitrate dehydrogenase (NAD(+)) 3 non-catalytic subunit beta [Source:HGNC Symbol;Acc:HGNC:5385]
20	2659762	2660637	876	WT_un_S5_peak_4816	56	4.70604	5.60575	2.31853	446	Promoter (<=1kb)	2658395	2660308	1914	-	ENSG00000101365	ENST00000466494	0	IDH3B	isocitrate dehydrogenase (NAD(+)) 3 non-catalytic subunit beta [Source:HGNC Symbol;Acc:HGNC:5385]
20	2664087	2664427	341	WT_un_S5_peak_4817	61	4.44677	6.16648	2.81951	168	Promoter (<=1kb)	2658395	2664188	5794	-	ENSG00000101365	ENST00000488299	0	IDH3B	isocitrate dehydrogenase (NAD(+)) 3 non-catalytic subunit beta [Source:HGNC Symbol;Acc:HGNC:5385]
20	32819961	32820261	301	WT_un_S5_peak_4900	26	2.21967	2.6949	0	133	Promoter (<=1kb)	32819954	32850405	30452	+	ENSG00000101367	ENST00000375571	7	MAPRE1	microtubule associated protein RP/EB family member 1 [Source:HGNC Symbol;Acc:HGNC:6890]
20	10629117	10629469	353	WT_un_S5_peak_4842	23	2.49183	2.34975	0	146	Intron (ENST00000488816/ENSG00000149346, intron 2 of 3)	10639870	10641276	1407	-	ENSG00000101384	ENST00000617357	11807	JAG1	jagged canonical Notch ligand 1 [Source:HGNC Symbol;Acc:HGNC:6188]
20	38033106	38033960	855	WT_un_S5_peak_4933	81	4.69317	8.16205	4.64804	285	Promoter (<=1kb)	37983007	38033461	50455	-	ENSG00000101407	ENST00000373448	0	TTI1	TELO2 interacting protein 1 [Source:HGNC Symbol;Acc:HGNC:29029]
20	23637514	23638115	602	WT_un_S5_peak_4878	93	5.35178	9.31879	5.72445	333	Promoter (<=1kb)	23626706	23637945	11240	-	ENSG00000101439	ENST00000398411	0	CST3	cystatin C [Source:HGNC Symbol;Acc:HGNC:2475]
20	34302900	34303641	742	WT_un_S5_peak_4904a	35	3.2222	3.51479	0.53357	182	Promoter (<=1kb)	34280268	34303355	23088	-	ENSG00000101444	ENST00000217426	0	AHCY	adenosylhomocysteinase [Source:HGNC Symbol;Acc:HGNC:343]
20	34302900	34303641	742	WT_un_S5_peak_4904b	36	3.07067	3.62443	0.59626	429	Promoter (<=1kb)	34280268	34303355	23088	-	ENSG00000101444	ENST00000217426	0	AHCY	adenosylhomocysteinase [Source:HGNC Symbol;Acc:HGNC:343]
20	38926166	38926700	535	WT_un_S5_peak_4938	112	6.26422	11.2084	7.51079	212	Promoter (<=1kb)	38926312	38953106	26795	+	ENSG00000101447	ENST00000619304	0	FAM83D	family with sequence similarity 83 member D [Source:HGNC Symbol;Acc:HGNC:16122]
20	34676685	34677315	631	WT_un_S5_peak_4905	38	3.169	3.82471	0.77684	418	Promoter (<=1kb)	34560542	34677092	116551	-	ENSG00000101464	ENST00000217446	0	PIGU	phosphatidylinositol glycan anchor biosynthesis class U [Source:HGNC Symbol;Acc:HGNC:15791]
20	24992377	24993232	856	WT_un_S5_peak_4882	84	5.12367	8.41215	4.886	405	Promoter (<=1kb)	24962925	24992642	29718	-	ENSG00000101474	ENST00000451442	0	APMAP	adipocyte plasma membrane associated protein [Source:HGNC Symbol;Acc:HGNC:13238]
18	9913759	9914277	519	WT_un_S5_peak_3685	95	5.82036	9.55623	5.95591	320	Promoter (<=1kb)	9914016	9960021	46006	+	ENSG00000101558	ENST00000400000	0	VAPA	VAMP associated protein A [Source:HGNC Symbol;Acc:HGNC:12648]
18	2655518	2655809	292	WT_un_S5_peak_3664	31	2.44778	3.15615	0.23813	267	Promoter (<=1kb)	2655726	2805017	149292	+	ENSG00000101596	ENST00000320876	0	SMCHD1	structural maintenance of chromosomes flexible hinge domain containing 1 [Source:HGNC Symbol;Acc:HGNC:29090]
18	3247094	3249034	1941	WT_un_S5_peak_3665a	40	3.92167	4.07966	0.98433	187	Promoter (<=1kb)	3247481	3256227	8747	+	ENSG00000101608	ENST00000579226	0	MYL12A	myosin light chain 12A [Source:HGNC Symbol;Acc:HGNC:16701]
18	3247094	3249034	1941	WT_un_S5_peak_3665b	214	11.4493	21.4658	17.3849	799	Promoter (<=1kb)	3247481	3256227	8747	+	ENSG00000101608	ENST00000579226	0	MYL12A	myosin light chain 12A [Source:HGNC Symbol;Acc:HGNC:16701]
18	3247094	3249034	1941	WT_un_S5_peak_3665c	35	3.46081	3.53919	0.53357	1629	Promoter (<=1kb)	3247481	3256227	8747	+	ENSG00000101608	ENST00000579226	0	MYL12A	myosin light chain 12A [Source:HGNC Symbol;Acc:HGNC:16701]
18	3250065	3250810	746	WT_un_S5_peak_3666	54	4.55817	5.42044	2.14934	164	Promoter (1-2kb)	3252218	3254050	1833	+	ENSG00000101608	ENST00000578562	-1408	MYL12A	myosin light chain 12A [Source:HGNC Symbol;Acc:HGNC:16701]
18	3251461	3252297	837	WT_un_S5_peak_3667	44	4.19238	4.45165	1.28046	693	Promoter (<=1kb)	3252218	3254050	1833	+	ENSG00000101608	ENST00000578562	0	MYL12A	myosin light chain 12A [Source:HGNC Symbol;Acc:HGNC:16701]
18	12702422	12703430	1009	WT_un_S5_peak_3705a	64	3.79738	6.48939	3.10625	168	Promoter (<=1kb)	12661833	12702639	40807	-	ENSG00000101624	ENST00000590143	0	CEP76	centrosomal protein 76 [Source:HGNC Symbol;Acc:HGNC:25727]
18	12702422	12703430	1009	WT_un_S5_peak_3705b	29	2.64517	2.95763	0.06978	623	Promoter (<=1kb)	12661833	12702639	40807	-	ENSG00000101624	ENST00000590143	0	CEP76	centrosomal protein 76 [Source:HGNC Symbol;Acc:HGNC:25727]
18	12990866	12991566	701	WT_un_S5_peak_3708	106	6.14206	10.652	6.99254	240	Promoter (<=1kb)	12991362	13059314	67953	+	ENSG00000101639	ENST00000589596	0	CEP192	centrosomal protein 192 [Source:HGNC Symbol;Acc:HGNC:25515]
18	13725844	13727777	1934	WT_un_S5_peak_3710a	58	4.51201	5.8007	2.49471	404	Promoter (<=1kb)	13726660	13760285	33626	+	ENSG00000101654	ENST00000543302	0	RNMT	RNA guanine-7 methyltransferase [Source:HGNC Symbol;Acc:HGNC:10075]
18	13725844	13727777	1934	WT_un_S5_peak_3710b	131	6.72045	13.1909	9.39886	848	Promoter (<=1kb)	13726660	13760285	33626	+	ENSG00000101654	ENST00000543302	0	RNMT	RNA guanine-7 methyltransferase [Source:HGNC Symbol;Acc:HGNC:10075]
18	48949089	48949530	442	WT_un_S5_peak_3766	33	2.92259	3.39624	0.43095	229	Promoter (<=1kb)	48920993	48949333	28341	-	ENSG00000101665	ENST00000591805	0	SMAD7	SMAD family member 7 [Source:HGNC Symbol;Acc:HGNC:6773]
18	48951475	48952120	646	WT_un_S5_peak_3767	60	3.72241	6.04172	2.70171	490	Promoter (<=1kb)	48919853	48950965	31113	-	ENSG00000101665	ENST00000262158	-510	SMAD7	SMAD family member 7 [Source:HGNC Symbol;Acc:HGNC:6773]
18	48952371	48953122	752	WT_un_S5_peak_3768a	46	3.72741	4.69327	1.50884	247	Promoter (1-2kb)	48919853	48950965	31113	-	ENSG00000101665	ENST00000262158	-1406	SMAD7	SMAD family member 7 [Source:HGNC Symbol;Acc:HGNC:6773]
18	48952371	48953122	752	WT_un_S5_peak_3768b	59	4.01944	5.98636	2.64918	529	Promoter (1-2kb)	48919853	48950965	31113	-	ENSG00000101665	ENST00000262158	-1406	SMAD7	SMAD family member 7 [Source:HGNC Symbol;Acc:HGNC:6773]
18	54269604	54269879	276	WT_un_S5_peak_3780	49	4.26383	4.98931	1.76911	130	Promoter (<=1kb)	54269592	54282923	13332	+	ENSG00000101751	ENST00000577971	12	POLI	DNA polymerase iota [Source:HGNC Symbol;Acc:HGNC:9182]
18	22933300	22933961	662	WT_un_S5_peak_3725	87	6.08558	8.72862	5.16636	279	Promoter (<=1kb)	22933328	23026486	93159	+	ENSG00000101773	ENST00000327155	0	RBBP8	RB binding protein 8, endonuclease [Source:HGNC Symbol;Acc:HGNC:9891]
18	23452969	23453340	372	WT_un_S5_peak_3726	32	3.01826	3.25718	0.31353	148	Promoter (<=1kb)	23453287	23463319	10033	+	ENSG00000101782	ENST00000584960	0	RIOK3	RIO kinase 3 [Source:HGNC Symbol;Acc:HGNC:11451]
X	108091248	108091522	275	WT_un_S5_peak_8670	44	3.82659	4.45165	1.28046	127	Promoter (<=1kb)	108084843	108091520	6678	-	ENSG00000101843	ENST00000340200	0	PSMD10	proteasome 26S subunit, non-ATPase 10 [Source:HGNC Symbol;Acc:HGNC:9555]
X	9466143	9466411	269	WT_un_S5_peak_8541	24	2.553	2.43654	0	74	Promoter (<=1kb)	9465294	9684118	218825	+	ENSG00000101849	ENST00000422314	849	TBL1X	transducin beta like 1 X-linked [Source:HGNC Symbol;Acc:HGNC:11585]
X	119236136	119236671	536	WT_un_S5_peak_8677	97	6.75288	9.74924	6.13049	208	Promoter (<=1kb)	119236245	119244465	8221	+	ENSG00000101856	ENST00000535419	0	PGRMC1	progesterone receptor membrane component 1 [Source:HGNC Symbol;Acc:HGNC:16090]
X	24693786	24694405	620	WT_un_S5_peak_8569	69	5.29033	6.95301	3.52892	238	Promoter (<=1kb)	24693873	24724848	30976	+	ENSG00000101868	ENST00000678847	0	POLA1	DNA polymerase alpha 1, catalytic subunit [Source:HGNC Symbol;Acc:HGNC:9173]
X	10618179	10618447	269	WT_un_S5_peak_8542	44	3.82659	4.45165	1.28046	211	Promoter (1-2kb)	10448106	10620419	172314	-	ENSG00000101871	ENST00000380782	1972	MID1	midline 1 [Source:HGNC Symbol;Acc:HGNC:7095]
X	10618744	10619684	941	WT_un_S5_peak_8543	23	2.38633	2.34354	0	343	Promoter (<=1kb)	10448106	10620419	172314	-	ENSG00000101871	ENST00000380782	735	MID1	midline 1 [Source:HGNC Symbol;Acc:HGNC:7095]
X	10620053	10620817	765	WT_un_S5_peak_8544	113	7.00117	11.3449	7.63533	378	Promoter (<=1kb)	10445556	10620585	175030	-	ENSG00000101871	ENST00000317552	0	MID1	midline 1 [Source:HGNC Symbol;Acc:HGNC:7095]
X	10634415	10634843	429	WT_un_S5_peak_8545	24	2.553	2.43654	0	278	Intron (ENST00000453318/ENSG00000101871, intron 1 of 9)	10445556	10620585	175030	-	ENSG00000101871	ENST00000317552	-13830	MID1	midline 1 [Source:HGNC Symbol;Acc:HGNC:7095]
X	10755178	10756330	1153	WT_un_S5_peak_8546a	43	4.09659	4.31906	1.1948	170	Intron (ENST00000380785/ENSG00000101871, intron 1 of 10)	10445556	10833643	388088	-	ENSG00000101871	ENST00000380785	77313	MID1	midline 1 [Source:HGNC Symbol;Acc:HGNC:7095]
X	10755178	10756330	1153	WT_un_S5_peak_8546b	63	5.24254	6.37088	3.01363	560	Intron (ENST00000380785/ENSG00000101871, intron 1 of 10)	10445556	10833643	388088	-	ENSG00000101871	ENST00000380785	77313	MID1	midline 1 [Source:HGNC Symbol;Acc:HGNC:7095]
X	109536934	109537309	376	WT_un_S5_peak_8671	26	3.09502	2.69119	0	239	Promoter (<=1kb)	109537118	109543206	6089	+	ENSG00000101888	ENST00000372103	0	NXT2	nuclear transport factor 2 like export factor 2 [Source:HGNC Symbol;Acc:HGNC:18151]
X	111681053	111681748	696	WT_un_S5_peak_8674	121	7.48446	12.1335	8.38243	213	Promoter (<=1kb)	111681118	111690172	9055	+	ENSG00000101901	ENST00000371979	0	ALG13	ALG13 UDP-N-acetylglucosaminyltransferase subunit [Source:HGNC Symbol;Acc:HGNC:30881]
X	110317949	110318437	489	WT_un_S5_peak_8673	64	5.28974	6.43923	3.05901	306	Promoter (<=1kb)	110194186	110318085	123900	-	ENSG00000101935	ENST00000262844	0	AMMECR1	AMMECR nuclear protein 1 [Source:HGNC Symbol;Acc:HGNC:467]
X	48597891	48598191	301	WT_un_S5_peak_8609	23	2.45954	2.30424	0	141	Promoter (<=1kb)	48597809	48605193	7385	+	ENSG00000101940	ENST00000479279	82	WDR13	WD repeat domain 13 [Source:HGNC Symbol;Acc:HGNC:14352]
X	48696368	48696946	579	WT_un_S5_peak_8610	67	4.80384	6.71822	3.31136	413	Promoter (<=1kb)	48696734	48709016	12283	+	ENSG00000101945	ENST00000376687	0	SUV39H1	suppressor of variegation 3-9 homolog 1 [Source:HGNC Symbol;Acc:HGNC:11479]
X	123859883	123860299	417	WT_un_S5_peak_8688	32	3.23733	3.22608	0.28631	266	Promoter (<=1kb)	123860053	123913972	53920	+	ENSG00000101966	ENST00000371199	0	XIAP	X-linked inhibitor of apoptosis [Source:HGNC Symbol;Acc:HGNC:592]
X	153726684	153726952	269	WT_un_S5_peak_8705	24	2.90199	2.44511	0	107	Promoter (<=1kb)	153725817	153729897	4081	+	ENSG00000101986	ENST00000370129	867	ABCD1	ATP binding cassette subfamily D member 1 [Source:HGNC Symbol;Acc:HGNC:61]
X	49171841	49172204	364	WT_un_S5_peak_8620	58	4.89385	5.87154	2.5571	187	Promoter (<=1kb)	49171898	49175235	3338	+	ENSG00000102007	ENST00000376327	0	PLP2	proteolipid protein 2 [Source:HGNC Symbol;Acc:HGNC:9087]
X	49172388	49172656	269	WT_un_S5_peak_8621	23	2.86338	2.39668	0	112	Promoter (<=1kb)	49171926	49173683	1758	+	ENSG00000102007	ENST00000376322	462	PLP2	proteolipid protein 2 [Source:HGNC Symbol;Acc:HGNC:9087]
X	115561007	115561541	535	WT_un_S5_peak_8675	58	4.21122	5.86499	2.55229	241	Promoter (<=1kb)	115561174	115629916	68743	+	ENSG00000102024	ENST00000489283	0	PLS3	plastin 3 [Source:HGNC Symbol;Acc:HGNC:9091]
X	16870031	16870305	275	WT_un_S5_peak_8556	30	2.89282	3.03845	0.13897	127	Promoter (<=1kb)	16869116	16870153	1038	-	ENSG00000102054	ENST00000493145	0	RBBP7	RB binding protein 7, chromatin remodeling factor [Source:HGNC Symbol;Acc:HGNC:9890]
X	48918746	48919215	470	WT_un_S5_peak_8615	76	5.75594	7.67804	4.19448	240	Promoter (<=1kb)	48913182	48919024	5843	-	ENSG00000102096	ENST00000376509	0	PIM2	Pim-2 proto-oncogene, serine/threonine kinase [Source:HGNC Symbol;Acc:HGNC:8987]
X	48911488	48911858	371	WT_un_S5_peak_8614	56	4.76702	5.69186	2.39319	205	Promoter (<=1kb)	48903180	48911651	8472	-	ENSG00000102100	ENST00000635285	0	SLC35A2	solute carrier family 35 member A2 [Source:HGNC Symbol;Acc:HGNC:11022]
X	48897490	48898143	654	WT_un_S5_peak_8613	64	4.92395	6.43923	3.05901	446	Promoter (<=1kb)	48897912	48903142	5231	+	ENSG00000102103	ENST00000376563	0	PQBP1	polyglutamine binding protein 1 [Source:HGNC Symbol;Acc:HGNC:9330]
X	78104011	78104460	450	WT_un_S5_peak_8652	109	7.11867	10.9254	7.24635	222	Promoter (<=1kb)	78104248	78129295	25048	+	ENSG00000102144	ENST00000373316	0	PGK1	phosphoglycerate kinase 1 [Source:HGNC Symbol;Acc:HGNC:8896]
X	21940577	21940991	415	WT_un_S5_peak_8562	98	5.29329	9.88712	6.26064	215	Promoter (<=1kb)	21940709	21994837	54129	+	ENSG00000102172	ENST00000404933	0	SMS	spermine synthase [Source:HGNC Symbol;Acc:HGNC:11123]
X	21942821	21943300	480	WT_un_S5_peak_8563	26	3.0674	2.65555	0	83	Promoter (1-2kb)	21941045	21978111	37067	+	ENSG00000102172	ENST00000457085	1776	SMS	spermine synthase [Source:HGNC Symbol;Acc:HGNC:11123]
X	21943956	21944894	939	WT_un_S5_peak_8564	44	3.82659	4.45165	1.28046	454	Promoter (2-3kb)	21941045	21978111	37067	+	ENSG00000102172	ENST00000457085	2911	SMS	spermine synthase [Source:HGNC Symbol;Acc:HGNC:11123]
12	92928229	92929476	1248	WT_un_S5_peak_2186a	33	3.34471	3.30737	0.35013	482	Promoter (<=1kb)	92770637	92929295	158659	-	ENSG00000102189	ENST00000322349	0	EEA1	early endosome antigen 1 [Source:HGNC Symbol;Acc:HGNC:3185]
12	92928229	92929476	1248	WT_un_S5_peak_2186b	76	5.75594	7.67804	4.19448	983	Promoter (<=1kb)	92770637	92929295	158659	-	ENSG00000102189	ENST00000322349	0	EEA1	early endosome antigen 1 [Source:HGNC Symbol;Acc:HGNC:3185]
X	46836725	46837641	917	WT_un_S5_peak_8595a	86	6.02131	8.60744	5.05654	309	Promoter (<=1kb)	46837043	46882358	45316	+	ENSG00000102218	ENST00000218340	0	RP2	RP2 activator of ARL3 GTPase [Source:HGNC Symbol;Acc:HGNC:10274]
X	46836725	46837641	917	WT_un_S5_peak_8595b	32	3.23733	3.22608	0.28631	774	Promoter (<=1kb)	46837043	46882358	45316	+	ENSG00000102218	ENST00000218340	0	RP2	RP2 activator of ARL3 GTPase [Source:HGNC Symbol;Acc:HGNC:10274]
X	47218787	47219082	296	WT_un_S5_peak_8598	26	2.72923	2.69119	0	156	Promoter (<=1kb)	47218776	47226578	7803	+	ENSG00000102225	ENST00000522234	11	CDK16	cyclin dependent kinase 16 [Source:HGNC Symbol;Acc:HGNC:8749]
X	47232759	47233544	786	WT_un_S5_peak_8599	54	4.55817	5.42044	2.14934	329	Promoter (<=1kb)	47232866	47248327	15462	+	ENSG00000102226	ENST00000218348	0	USP11	ubiquitin specific peptidase 11 [Source:HGNC Symbol;Acc:HGNC:12609]
X	151974230	151974690	461	WT_un_S5_peak_8703	54	3.50058	5.46828	2.18945	421	Promoter (<=1kb)	151953124	151974676	21553	-	ENSG00000102287	ENST00000370328	0	GABRE	gamma-aminobutyric acid type A receptor subunit epsilon [Source:HGNC Symbol;Acc:HGNC:4085]
X	48574166	48575370	1205	WT_un_S5_peak_8605	162	9.05417	16.2172	12.2996	355	Promoter (<=1kb)	48574449	48576591	2143	+	ENSG00000102317	ENST00000472897	0	RBM3	RNA binding motif protein 3 [Source:HGNC Symbol;Acc:HGNC:9900]
X	48575850	48576153	304	WT_un_S5_peak_8606	35	3.46081	3.53919	0.53357	133	Promoter (<=1kb)	48575899	48578291	2393	+	ENSG00000102317	ENST00000354480	0	RBM3	RNA binding motif protein 3 [Source:HGNC Symbol;Acc:HGNC:9900]
X	100644102	100644646	545	WT_un_S5_peak_8656	40	3.5795	4.07966	0.98433	192	Promoter (<=1kb)	100644195	100665547	21353	+	ENSG00000102359	ENST00000640889	0	SRPX2	sushi repeat containing protein X-linked 2 [Source:HGNC Symbol;Acc:HGNC:30668]
X	101407548	101408130	583	WT_un_S5_peak_8659	40	3.5795	4.07966	0.98433	197	Promoter (<=1kb)	101393273	101407990	14718	-	ENSG00000102393	ENST00000674142	0	GLA	galactosidase alpha [Source:HGNC Symbol;Acc:HGNC:4296]
X	103215012	103215280	269	WT_un_S5_peak_8663	32	3.23733	3.22608	0.28631	127	Promoter (<=1kb)	103215108	103217246	2139	+	ENSG00000102409	ENST00000372695	0	BEX4	brain expressed X-linked 4 [Source:HGNC Symbol;Acc:HGNC:25475]
13	79480887	79482248	1362	WT_un_S5_peak_2449a	162	9.05417	16.2172	12.2996	499	Promoter (<=1kb)	79481124	79556070	74947	+	ENSG00000102471	ENST00000612570	0	NDFIP2	Nedd4 family interacting protein 2 [Source:HGNC Symbol;Acc:HGNC:18537]
13	79480887	79482248	1362	WT_un_S5_peak_2449b	44	4.19238	4.45165	1.28046	1132	Promoter (<=1kb)	79481124	79556070	74947	+	ENSG00000102471	ENST00000612570	0	NDFIP2	Nedd4 family interacting protein 2 [Source:HGNC Symbol;Acc:HGNC:18537]
13	79482589	79483063	475	WT_un_S5_peak_2450	32	3.23733	3.22608	0.28631	285	Promoter (1-2kb)	79481474	79554096	72623	+	ENSG00000102471	ENST00000620924	1115	NDFIP2	Nedd4 family interacting protein 2 [Source:HGNC Symbol;Acc:HGNC:18537]
13	79483321	79483589	269	WT_un_S5_peak_2451	26	3.09502	2.69119	0	125	Promoter (1-2kb)	79481474	79554096	72623	+	ENSG00000102471	ENST00000620924	1847	NDFIP2	Nedd4 family interacting protein 2 [Source:HGNC Symbol;Acc:HGNC:18537]
13	79484968	79485619	652	WT_un_S5_peak_2452	64	4.92395	6.43923	3.05901	152	Intron (ENST00000612570/ENSG00000102471, intron 1 of 7)	79481474	79554096	72623	+	ENSG00000102471	ENST00000620924	3494	NDFIP2	Nedd4 family interacting protein 2 [Source:HGNC Symbol;Acc:HGNC:18537]
13	79486048	79486513	466	WT_un_S5_peak_2453	26	3.09502	2.69119	0	330	Intron (ENST00000612570/ENSG00000102471, intron 1 of 7)	79481474	79554096	72623	+	ENSG00000102471	ENST00000620924	4574	NDFIP2	Nedd4 family interacting protein 2 [Source:HGNC Symbol;Acc:HGNC:18537]
13	48975913	48976223	311	WT_un_S5_peak_2423	54	3.50058	5.46828	2.18945	151	Promoter (<=1kb)	48976069	49146847	170779	+	ENSG00000102531	ENST00000378383	0	FNDC3A	fibronectin type III domain containing 3A [Source:HGNC Symbol;Acc:HGNC:20296]
13	49443943	49444295	353	WT_un_S5_peak_2424	31	3.19797	3.11341	0.19993	167	Promoter (<=1kb)	49308650	49444064	135415	-	ENSG00000102547	ENST00000409308	0	CAB39L	calcium binding protein 39 like [Source:HGNC Symbol;Acc:HGNC:20290]
13	73058735	73059452	718	WT_un_S5_peak_2442	75	5.65553	7.50295	4.04628	257	Promoter (<=1kb)	73059005	73077538	18534	+	ENSG00000102554	ENST00000377687	0	KLF5	Kruppel like factor 5 [Source:HGNC Symbol;Acc:HGNC:6349]
13	95676878	95677306	429	WT_un_S5_peak_2459	58	4.21122	5.86499	2.55229	320	Promoter (<=1kb)	95677139	95794988	117850	+	ENSG00000102580	ENST00000602402	0	DNAJC3	DnaJ heat shock protein family (Hsp40) member C3 [Source:HGNC Symbol;Acc:HGNC:9439]
13	96053310	96053619	310	WT_un_S5_peak_2460	23	2.78918	2.30424	0	130	Promoter (<=1kb)	95801580	96053401	251822	-	ENSG00000102595	ENST00000376747	0	UGGT2	UDP-glucose glycoprotein glucosyltransferase 2 [Source:HGNC Symbol;Acc:HGNC:15664]
13	111153510	111153981	472	WT_un_S5_peak_2494	38	3.19528	3.81524	0.77032	295	Promoter (<=1kb)	111153647	111217800	64154	+	ENSG00000102606	ENST00000491775	0	ARHGEF7	Rho guanine nucleotide exchange factor 7 [Source:HGNC Symbol;Acc:HGNC:15607]
13	24512391	24513294	904	WT_un_S5_peak_2318	59	4.30949	5.95321	2.61777	358	Promoter (<=1kb)	24420931	24512778	91848	-	ENSG00000102699	ENST00000381989	0	PARP4	poly(ADP-ribose) polymerase family member 4 [Source:HGNC Symbol;Acc:HGNC:271]
13	37078574	37078842	269	WT_un_S5_peak_2382	24	2.59399	2.49512	0	232	Distal Intergenic	37009316	37059713	50398	-	ENSG00000102710	ENST00000360252	-18861	SUPT20H	SPT20 homolog, SAGA complex component [Source:HGNC Symbol;Acc:HGNC:20596]
13	42040029	42040385	357	WT_un_S5_peak_2392	53	3.41806	5.37456	2.11588	207	Promoter (<=1kb)	42040036	42229755	189720	+	ENSG00000102780	ENST00000379274	0	DGKH	diacylglycerol kinase eta [Source:HGNC Symbol;Acc:HGNC:2854]
13	51452655	51453510	856	WT_un_S5_peak_2431	353	10.5703	35.3449	30.9747	338	Promoter (<=1kb)	51361565	51453207	91643	-	ENSG00000102786	ENST00000398119	0	INTS6	integrator complex subunit 6 [Source:HGNC Symbol;Acc:HGNC:14879]
13	51803492	51804190	699	WT_un_S5_peak_2434	93	5.57989	9.31879	5.72445	443	Promoter (<=1kb)	51767993	51804123	36131	-	ENSG00000102796	ENST00000650833	0	DHRS12	dehydrogenase/reductase 12 [Source:HGNC Symbol;Acc:HGNC:25832]
13	44432415	44437688	5274	WT_un_S5_peak_2399a	40	3.92167	4.07966	0.98433	382	Promoter (<=1kb)	44432143	44436845	4703	-	ENSG00000102804	ENST00000261489	0	TSC22D1	TSC22 domain family member 1 [Source:HGNC Symbol;Acc:HGNC:16826]
13	44432415	44437688	5274	WT_un_S5_peak_2399b	59	4.606	5.94877	2.6174	715	Promoter (<=1kb)	44432143	44436845	4703	-	ENSG00000102804	ENST00000261489	0	TSC22D1	TSC22 domain family member 1 [Source:HGNC Symbol;Acc:HGNC:16826]
13	44432415	44437688	5274	WT_un_S5_peak_2399c	44	4.19238	4.45165	1.28046	1712	Promoter (<=1kb)	44432143	44436845	4703	-	ENSG00000102804	ENST00000261489	0	TSC22D1	TSC22 domain family member 1 [Source:HGNC Symbol;Acc:HGNC:16826]
13	44432415	44437688	5274	WT_un_S5_peak_2399d	86	6.02131	8.60744	5.05654	2196	Promoter (<=1kb)	44432143	44436845	4703	-	ENSG00000102804	ENST00000261489	0	TSC22D1	TSC22 domain family member 1 [Source:HGNC Symbol;Acc:HGNC:16826]
13	44432415	44437688	5274	WT_un_S5_peak_2399e	137	8.02767	13.7287	9.90399	3213	Promoter (<=1kb)	44432143	44436845	4703	-	ENSG00000102804	ENST00000261489	0	TSC22D1	TSC22 domain family member 1 [Source:HGNC Symbol;Acc:HGNC:16826]
13	44432415	44437688	5274	WT_un_S5_peak_2399f	667	25.2047	66.7108	61.8316	4387	Promoter (<=1kb)	44432143	44436845	4703	-	ENSG00000102804	ENST00000261489	0	TSC22D1	TSC22 domain family member 1 [Source:HGNC Symbol;Acc:HGNC:16826]
13	44432415	44437688	5274	WT_un_S5_peak_2399g	23	2.61444	2.34354	0	5127	Promoter (<=1kb)	44432143	44436845	4703	-	ENSG00000102804	ENST00000261489	0	TSC22D1	TSC22 domain family member 1 [Source:HGNC Symbol;Acc:HGNC:16826]
13	76991917	76992410	494	WT_un_S5_peak_2446	44	4.19238	4.45165	1.28046	240	Promoter (<=1kb)	76992044	77002477	10434	+	ENSG00000102805	ENST00000636780	0	CLN5	CLN5 intracellular trafficking protein [Source:HGNC Symbol;Acc:HGNC:2076]
16	47460992	47461576	585	WT_un_S5_peak_3121	28	3.00051	2.85297	0	130	Promoter (<=1kb)	47461123	47547547	86425	+	ENSG00000102893	ENST00000566037	0	PHKB	phosphorylase kinase regulatory subunit beta [Source:HGNC Symbol;Acc:HGNC:8927]
16	20900239	20901665	1427	WT_un_S5_peak_3065	79	5.97467	7.99793	4.48953	599	Promoter (<=1kb)	20900411	20921463	21053	+	ENSG00000102897	ENST00000567165	0	LYRM1	LYR motif containing 1 [Source:HGNC Symbol;Acc:HGNC:25074]
16	67833580	67834028	449	WT_un_S5_peak_3156	59	3.98707	5.9318	2.61578	241	Promoter (<=1kb)	67828157	67833913	5757	-	ENSG00000102901	ENST00000569862	0	CENPT	centromere protein T [Source:HGNC Symbol;Acc:HGNC:25787]
16	69529732	69530014	283	WT_un_S5_peak_3165	62	3.88255	6.24684	2.89536	139	Distal Intergenic	69565094	69704650	139557	+	ENSG00000102908	ENST00000426654	-35080	NFAT5	nuclear factor of activated T cells 5 [Source:HGNC Symbol;Acc:HGNC:7774]
16	49828547	49829039	493	WT_un_S5_peak_3123	32	3.2893	3.29821	0.35013	332	Promoter (1-2kb)	49487524	49827010	339487	-	ENSG00000102935	ENST00000561648	-1537	ZNF423	zinc finger protein 423 [Source:HGNC Symbol;Acc:HGNC:16762]
16	57462483	57462955	473	WT_un_S5_peak_3138	129	7.53842	12.9335	9.15135	222	Promoter (<=1kb)	57462660	57469903	7244	+	ENSG00000102978	ENST00000563115	0	POLR2C	RNA polymerase II subunit C [Source:HGNC Symbol;Acc:HGNC:9189]
16	71895165	71895715	551	WT_un_S5_peak_3183	36	3.33918	3.68213	0.6488	340	Promoter (<=1kb)	71880008	71895336	15329	-	ENSG00000102984	ENST00000561700	0	ZNF821	zinc finger protein 821 [Source:HGNC Symbol;Acc:HGNC:28043]
16	69424368	69424673	306	WT_un_S5_peak_3164	36	3.07067	3.62443	0.59626	144	Promoter (<=1kb)	69424619	69450238	25620	+	ENSG00000103018	ENST00000514123	0	CYB5B	cytochrome b5 type B [Source:HGNC Symbol;Acc:HGNC:24374]
16	58264985	58265298	314	WT_un_S5_peak_3141	23	2.78918	2.30424	0	154	Intron (ENST00000219299/ENSG00000103021, intron 6 of 8)	58249988	58252767	2780	+	ENSG00000103021	ENST00000566498	14997	CCDC113	coiled-coil domain containing 113 [Source:HGNC Symbol;Acc:HGNC:25002]
16	74296531	74297472	942	WT_un_S5_peak_3189	79	5.6325	7.99793	4.48953	363	Promoter (<=1kb)	74296814	74306288	9475	+	ENSG00000103035	ENST00000219313	0	PSMD7	proteasome 26S subunit, non-ATPase 7 [Source:HGNC Symbol;Acc:HGNC:9565]
16	70800902	70801466	565	WT_un_S5_peak_3176	96	5.97115	9.68188	6.07345	301	Promoter (<=1kb)	70687439	70800982	113544	-	ENSG00000103043	ENST00000568886	0	VAC14	VAC14 component of PIKFYVE complex [Source:HGNC Symbol;Acc:HGNC:25507]
16	70804620	70805342	723	WT_un_S5_peak_3177	84	5.12367	8.41215	4.886	323	3' UTR	70687441	70801160	113720	-	ENSG00000103043	ENST00000568548	-3460	VAC14	VAC14 component of PIKFYVE complex [Source:HGNC Symbol;Acc:HGNC:25507]
16	68843414	68843962	549	WT_un_S5_peak_3161	33	3.13333	3.37576	0.41352	132	Promoter (<=1kb)	68843531	69085182	241652	+	ENSG00000103047	ENST00000261778	0	TANGO6	transport and golgi organization 6 homolog [Source:HGNC Symbol;Acc:HGNC:25749]
16	70523443	70524125	683	WT_un_S5_peak_3175	106	5.69642	10.6118	6.95657	430	Promoter (<=1kb)	70480568	70523558	42991	-	ENSG00000103051	ENST00000564415	0	COG4	component of oligomeric golgi complex 4 [Source:HGNC Symbol;Acc:HGNC:18620]
16	68264208	68264719	512	WT_un_S5_peak_3159	38	3.46498	3.86117	0.81262	283	Promoter (<=1kb)	68264516	68301823	37308	+	ENSG00000103064	ENST00000618043	0	SLC7A6	solute carrier family 7 member 6 [Source:HGNC Symbol;Acc:HGNC:11064]
16	81006851	81007511	661	WT_un_S5_peak_3199	36	3.29878	3.62443	0.59626	451	Promoter (<=1kb)	80966448	81006885	40438	-	ENSG00000103121	ENST00000219400	0	CMC2	C-X9-C motif containing 2 [Source:HGNC Symbol;Acc:HGNC:24447]
16	3025573	3026199	627	WT_un_S5_peak_3031	50	3.98311	5.08049	1.8432	199	Promoter (1-2kb)	3022918	3024286	1369	-	ENSG00000103145	ENST00000573842	-1287	HCFC1R1	host cell factor C1 regulator 1 [Source:HGNC Symbol;Acc:HGNC:21198]
16	84617737	84618300	564	WT_un_S5_peak_3205	86	6.02131	8.60744	5.05654	313	Promoter (<=1kb)	84565596	84618078	52483	-	ENSG00000103187	ENST00000262428	0	COTL1	coactosin like F-actin binding protein 1 [Source:HGNC Symbol;Acc:HGNC:18304]
16	84819857	84820261	405	WT_un_S5_peak_3206	66	4.43933	6.6833	3.28307	188	Promoter (<=1kb)	84819985	84838551	18567	+	ENSG00000103196	ENST00000566151	0	CRISPLD2	cysteine rich secretory protein LCCL domain containing 2 [Source:HGNC Symbol;Acc:HGNC:25248]
16	15998078	15998453	376	WT_un_S5_peak_3053	23	2.49183	2.34975	0	74	Intron (ENST00000574224/ENSG00000103222, intron 1 of 11)	16007816	16057571	49756	+	ENSG00000103222	ENST00000679043	-9363	ABCC1	ATP binding cassette subfamily C member 1 [Source:HGNC Symbol;Acc:HGNC:51]
16	87846649	87847199	551	WT_un_S5_peak_3214	35	3.46081	3.53919	0.53357	188	Intron (ENST00000565644/ENSG00000103257, intron 2 of 9)	87832732	87836805	4074	-	ENSG00000103257	ENST00000563489	-9844	SLC7A5	solute carrier family 7 member 5 [Source:HGNC Symbol;Acc:HGNC:11063]
16	87851472	87851984	513	WT_un_S5_peak_3215	24	2.89517	2.43654	0	155	5' UTR	87830023	87863639	33617	-	ENSG00000103257	ENST00000565644	11655	SLC7A5	solute carrier family 7 member 5 [Source:HGNC Symbol;Acc:HGNC:11063]
16	87869074	87869726	653	WT_un_S5_peak_3216	254	10.3702	25.4237	21.2473	382	Promoter (<=1kb)	87830023	87869507	39485	-	ENSG00000103257	ENST00000261622	0	SLC7A5	solute carrier family 7 member 5 [Source:HGNC Symbol;Acc:HGNC:11063]
16	87391814	87392576	763	WT_un_S5_peak_3212	97	5.52792	9.77246	6.15248	554	Promoter (<=1kb)	87367652	87392107	24456	-	ENSG00000103264	ENST00000569412	0	FBXO31	F-box protein 31 [Source:HGNC Symbol;Acc:HGNC:16510]
16	10743707	10744529	823	WT_un_S5_peak_3043	114	7.03929	11.4992	7.78632	222	Promoter (<=1kb)	10743786	10757994	14209	+	ENSG00000103274	ENST00000574334	0	NUBP1	nucleotide binding protein 1 [Source:HGNC Symbol;Acc:HGNC:8041]
16	23557318	23557588	271	WT_un_S5_peak_3072	23	2.61444	2.34354	0	124	Promoter (<=1kb)	23520754	23557350	36597	-	ENSG00000103356	ENST00000449606	0	EARS2	glutamyl-tRNA synthetase 2, mitochondrial [Source:HGNC Symbol;Acc:HGNC:29419]
16	14632499	14633045	547	WT_un_S5_peak_3050	118	7.13845	11.8096	8.0792	184	Promoter (<=1kb)	14632931	14650556	17626	+	ENSG00000103429	ENST00000566520	0	BFAR	bifunctional apoptosis regulator [Source:HGNC Symbol;Acc:HGNC:17613]
16	29805512	29805797	286	WT_un_S5_peak_3085	31	2.44778	3.15615	0.23813	223	Promoter (<=1kb)	29806106	29811160	5055	+	ENSG00000103495	ENST00000545521	-309	MAZ	MYC associated zinc finger protein [Source:HGNC Symbol;Acc:HGNC:6914]
16	19523839	19524128	290	WT_un_S5_peak_3060	44	4.19238	4.45165	1.28046	144	Promoter (<=1kb)	19523857	19553408	29552	+	ENSG00000103540	ENST00000381396	0	CCP110	centriolar coiled-coil protein 110 [Source:HGNC Symbol;Acc:HGNC:24342]
16	19717870	19718583	714	WT_un_S5_peak_3061	110	6.83341	11.0732	7.38568	217	Promoter (<=1kb)	19701937	19718227	16291	-	ENSG00000103550	ENST00000219837	0	KNOP1	lysine rich nucleolar protein 1 [Source:HGNC Symbol;Acc:HGNC:34404]
15	67254344	67255184	841	WT_un_S5_peak_2923	137	7.45103	13.7995	9.9719	528	Promoter (<=1kb)	67200667	67254661	53995	-	ENSG00000103591	ENST00000261880	0	AAGAB	alpha and gamma adaptin binding protein [Source:HGNC Symbol;Acc:HGNC:25662]
15	63121743	63122111	369	WT_un_S5_peak_2899	33	3.34471	3.30737	0.35013	225	Promoter (<=1kb)	63121833	63131471	9639	+	ENSG00000103642	ENST00000413507	0	LACTB	lactamase beta [Source:HGNC Symbol;Acc:HGNC:16468]
15	65869120	65869742	623	WT_un_S5_peak_2910	75	4.66745	7.53305	4.06575	392	Promoter (<=1kb)	65869456	65888247	18792	+	ENSG00000103769	ENST00000564910	0	RAB11A	RAB11A, member RAS oncogene family [Source:HGNC Symbol;Acc:HGNC:9760]
15	99250882	99251526	645	WT_un_S5_peak_3006	48	4.17232	4.85653	1.6543	235	Promoter (<=1kb)	99137553	99251223	113671	-	ENSG00000103852	ENST00000558663	0	TTC23	tetratricopeptide repeat domain 23 [Source:HGNC Symbol;Acc:HGNC:25730]
15	41972357	41972900	544	WT_un_S5_peak_2817	48	4.16167	4.8415	1.64098	132	Promoter (<=1kb)	41895933	41972557	76625	-	ENSG00000103966	ENST00000220325	0	EHD4	EH domain containing 4 [Source:HGNC Symbol;Acc:HGNC:3245]
15	42273037	42273939	903	WT_un_S5_peak_2819	101	6.659	10.1966	6.55518	393	Promoter (<=1kb)	42210447	42273433	62987	-	ENSG00000103978	ENST00000389834	0	TMEM87A	transmembrane protein 87A [Source:HGNC Symbol;Acc:HGNC:24522]
15	48810639	48810991	353	WT_un_S5_peak_2845	44	4.19238	4.45165	1.28046	209	Promoter (<=1kb)	48738151	48810987	72837	-	ENSG00000103995	ENST00000399334	0	CEP152	centrosomal protein 152 [Source:HGNC Symbol;Acc:HGNC:29298]
15	49620680	49621322	643	WT_un_S5_peak_2847	44	4.19238	4.45165	1.28046	380	Promoter (<=1kb)	49621037	49629967	8931	+	ENSG00000104047	ENST00000557968	0	DTWD1	DTW domain containing 1 [Source:HGNC Symbol;Acc:HGNC:30926]
15	50354603	50355729	1127	WT_un_S5_peak_2848a	75	4.89556	7.53305	4.06575	326	Promoter (<=1kb)	50275389	50355198	79810	-	ENSG00000104064	ENST00000380877	0	GABPB1	GA binding protein transcription factor subunit beta 1 [Source:HGNC Symbol;Acc:HGNC:4074]
15	50354603	50355729	1127	WT_un_S5_peak_2848b	137	8.02767	13.7287	9.90399	859	Promoter (<=1kb)	50275389	50355198	79810	-	ENSG00000104064	ENST00000380877	0	GABPB1	GA binding protein transcription factor subunit beta 1 [Source:HGNC Symbol;Acc:HGNC:4074]
15	44536466	44537489	1024	WT_un_S5_peak_2834a	60	4.3543	6.02291	2.68389	257	Promoter (<=1kb)	44537125	44561999	24875	+	ENSG00000104131	ENST00000424492	0	EIF3J	eukaryotic translation initiation factor 3 subunit J [Source:HGNC Symbol;Acc:HGNC:3270]
15	44536466	44537489	1024	WT_un_S5_peak_2834b	144	7.85521	14.4622	10.6174	778	Promoter (<=1kb)	44537125	44561999	24875	+	ENSG00000104131	ENST00000424492	0	EIF3J	eukaryotic translation initiation factor 3 subunit J [Source:HGNC Symbol;Acc:HGNC:3270]
15	44663106	44663994	889	WT_un_S5_peak_2835a	40	3.87861	4.02122	0.94915	195	Promoter (<=1kb)	44554818	44663678	108861	-	ENSG00000104133	ENST00000684235	0	SPG11	SPG11 vesicle trafficking associated, spatacsin [Source:HGNC Symbol;Acc:HGNC:11226]
15	44663106	44663994	889	WT_un_S5_peak_2835b	50	4.27388	5.00389	1.78125	610	Promoter (<=1kb)	44554818	44663678	108861	-	ENSG00000104133	ENST00000684235	0	SPG11	SPG11 vesicle trafficking associated, spatacsin [Source:HGNC Symbol;Acc:HGNC:11226]
15	41332483	41333274	792	WT_un_S5_peak_2815	76	5.4263	7.67804	4.19448	535	Promoter (<=1kb)	41309273	41332591	23319	-	ENSG00000104147	ENST00000220514	0	OIP5	Opa interacting protein 5 [Source:HGNC Symbol;Acc:HGNC:20300]
15	45586947	45587891	945	WT_un_S5_peak_2840a	121	7.85024	12.1335	8.38243	234	Promoter (<=1kb)	45587214	45607046	19833	+	ENSG00000104164	ENST00000567740	0	BLOC1S6	biogenesis of lysosomal organelles complex 1 subunit 6 [Source:HGNC Symbol;Acc:HGNC:8549]
15	45586947	45587891	945	WT_un_S5_peak_2840b	86	6.02131	8.60744	5.05654	725	Promoter (<=1kb)	45587214	45607046	19833	+	ENSG00000104164	ENST00000567740	0	BLOC1S6	biogenesis of lysosomal organelles complex 1 subunit 6 [Source:HGNC Symbol;Acc:HGNC:8549]
8	67062257	67062525	269	WT_un_S5_peak_7962	31	3.19797	3.11341	0.19993	210	Promoter (<=1kb)	67062417	67064415	1999	+	ENSG00000104218	ENST00000674647	0	CSPP1	centrosome and spindle pole associated protein 1 [Source:HGNC Symbol;Acc:HGNC:26193]
8	67064204	67064656	453	WT_un_S5_peak_7963	84	5.12367	8.41215	4.886	216	Promoter (<=1kb)	67064316	67196246	131931	+	ENSG00000104218	ENST00000675306	0	CSPP1	centrosome and spindle pole associated protein 1 [Source:HGNC Symbol;Acc:HGNC:26193]
8	54570885	54571153	269	WT_un_S5_peak_7907	23	2.49183	2.34975	0	175	Intron (ENST00000602362/ENSG00000104237, intron 3 of 3)	54559169	54769977	210809	+	ENSG00000104237	ENST00000636932	11716	RP1	RP1 axonemal microtubule associated [Source:HGNC Symbol;Acc:HGNC:10263]
8	89757499	89758110	612	WT_un_S5_peak_8027	136	6.69356	13.6062	9.79342	222	Promoter (<=1kb)	89757806	89790608	32803	+	ENSG00000104312	ENST00000522965	0	RIPK2	receptor interacting serine/threonine kinase 2 [Source:HGNC Symbol;Acc:HGNC:10020]
8	71214048	71214453	406	WT_un_S5_peak_7974	32	3.23733	3.22608	0.28631	195	Intron (ENST00000647843/ENSG00000285579, intron 7 of 8)	71197448	71270238	72791	-	ENSG00000104313	ENST00000644424	55785	EYA1	EYA transcriptional coactivator and phosphatase 1 [Source:HGNC Symbol;Acc:HGNC:3519]
8	71307813	71308216	404	WT_un_S5_peak_7975	24	2.553	2.43654	0	185	Intron (ENST00000388742/ENSG00000104313, intron 6 of 16)	71215613	71299108	83496	-	ENSG00000104313	ENST00000493349	-8705	EYA1	EYA transcriptional coactivator and phosphatase 1 [Source:HGNC Symbol;Acc:HGNC:3519]
8	89984130	89984836	707	WT_un_S5_peak_8029a	36	3.07067	3.62443	0.59626	222	Promoter (<=1kb)	89933331	89984667	51337	-	ENSG00000104320	ENST00000265433	0	NBN	nibrin [Source:HGNC Symbol;Acc:HGNC:7652]
8	89984130	89984836	707	WT_un_S5_peak_8029b	30	3.11882	3.06293	0.15335	558	Promoter (<=1kb)	89933331	89984667	51337	-	ENSG00000104320	ENST00000265433	0	NBN	nibrin [Source:HGNC Symbol;Acc:HGNC:7652]
8	90001279	90001795	517	WT_un_S5_peak_8030	44	3.82659	4.45165	1.28046	142	Promoter (<=1kb)	90001405	90051920	50516	+	ENSG00000104325	ENST00000519328	0	DECR1	2,4-dienoyl-CoA reductase 1 [Source:HGNC Symbol;Acc:HGNC:2753]
8	41309270	41309711	442	WT_un_S5_peak_7877	38	3.44846	3.88541	0.82322	169	Promoter (<=1kb)	41261962	41309473	47512	-	ENSG00000104332	ENST00000220772	0	SFRP1	secreted frizzled related protein 1 [Source:HGNC Symbol;Acc:HGNC:10776]
8	73878350	73879273	924	WT_un_S5_peak_7984	85	5.56124	8.59198	5.05654	632	Promoter (<=1kb)	73786219	73878862	92644	-	ENSG00000104343	ENST00000602593	0	UBE2W	ubiquitin conjugating enzyme E2 W [Source:HGNC Symbol;Acc:HGNC:25616]
8	98117027	98117538	512	WT_un_S5_peak_8050	39	3.51555	3.919	0.85551	308	Promoter (<=1kb)	98117293	98159835	42543	+	ENSG00000104356	ENST00000401707	0	POP1	POP1 homolog, ribonuclease P/MRP subunit [Source:HGNC Symbol;Acc:HGNC:30129]
8	74270816	74271172	357	WT_un_S5_peak_7988	47	4.10774	4.76379	1.57115	170	Intron (ENST00000342232/ENSG00000104369, intron 2 of 5)	74236803	74244788	7986	-	ENSG00000104369	ENST00000518195	-26028	JPH1	junctophilin 1 [Source:HGNC Symbol;Acc:HGNC:14201]
8	74350432	74350755	324	WT_un_S5_peak_7989	56	4.43738	5.69186	2.39319	131	Promoter (<=1kb)	74350434	74366833	16400	+	ENSG00000104381	ENST00000676049	0	GDAP1	ganglioside induced differentiation associated protein 1 [Source:HGNC Symbol;Acc:HGNC:15968]
8	74360196	74360464	269	WT_un_S5_peak_7990	30	3.07892	3.00838	0.11344	183	Promoter (2-3kb)	74362841	74365767	2927	+	ENSG00000104381	ENST00000675474	-2377	GDAP1	ganglioside induced differentiation associated protein 1 [Source:HGNC Symbol;Acc:HGNC:15968]
8	74476391	74476681	291	WT_un_S5_peak_7991	23	2.45954	2.30424	0	125	Intron (ENST00000674710/ENSG00000104381, intron 7 of 7)	74496409	74518007	21599	+	ENSG00000104381	ENST00000675460	-19728	GDAP1	ganglioside induced differentiation associated protein 1 [Source:HGNC Symbol;Acc:HGNC:15968]
8	74480533	74480801	269	WT_un_S5_peak_7992	26	3.02431	2.60024	0	172	Intron (ENST00000674710/ENSG00000104381, intron 7 of 7)	74496409	74518007	21599	+	ENSG00000104381	ENST00000675460	-15608	GDAP1	ganglioside induced differentiation associated protein 1 [Source:HGNC Symbol;Acc:HGNC:15968]
8	60516607	60517132	526	WT_un_S5_peak_7930	71	4.65948	7.14869	3.7138	330	Promoter (<=1kb)	60516936	60620988	104053	+	ENSG00000104388	ENST00000531289	0	RAB2A	RAB2A, member RAS oncogene family [Source:HGNC Symbol;Acc:HGNC:9763]
8	108248483	108248960	478	WT_un_S5_peak_8093	49	4.26383	4.98931	1.76911	194	Promoter (<=1kb)	108162787	108248724	85938	-	ENSG00000104408	ENST00000678042	0	EIF3E	eukaryotic translation initiation factor 3 subunit E [Source:HGNC Symbol;Acc:HGNC:3277]
8	108443529	108443988	460	WT_un_S5_peak_8094	44	3.82659	4.45165	1.28046	298	Promoter (<=1kb)	108443601	108455902	12302	+	ENSG00000104412	ENST00000524143	0	EMC2	ER membrane protein complex subunit 2 [Source:HGNC Symbol;Acc:HGNC:28963]
8	133296727	133298098	1372	WT_un_S5_peak_8174	218	9.45778	21.8929	17.8028	564	Promoter (<=1kb)	133237175	133297252	60078	-	ENSG00000104419	ENST00000323851	0	NDRG1	N-myc downstream regulated 1 [Source:HGNC Symbol;Acc:HGNC:7679]
8	65633905	65634236	332	WT_un_S5_peak_7951	30	2.89282	3.03845	0.13897	165	Promoter (<=1kb)	65602458	65634177	31720	-	ENSG00000104442	ENST00000276569	0	ARMC1	armadillo repeat containing 1 [Source:HGNC Symbol;Acc:HGNC:17684]
8	140511148	140512535	1388	WT_un_S5_peak_8186a	53	3.21107	5.31046	2.05735	371	Promoter (<=1kb)	140511311	140516467	5157	+	ENSG00000104472	ENST00000519533	0	CHRAC1	chromatin accessibility complex subunit 1 [Source:HGNC Symbol;Acc:HGNC:13544]
8	140511148	140512535	1388	WT_un_S5_peak_8186b	93	5.35178	9.31879	5.72445	1012	Promoter (<=1kb)	140511311	140516467	5157	+	ENSG00000104472	ENST00000519533	0	CHRAC1	chromatin accessibility complex subunit 1 [Source:HGNC Symbol;Acc:HGNC:13544]
8	143597043	143597596	554	WT_un_S5_peak_8191a	37	3.11737	3.70405	0.66826	163	Promoter (<=1kb)	143579697	143597388	17692	-	ENSG00000104529	ENST00000317198	0	EEF1D	eukaryotic translation elongation factor 1 delta [Source:HGNC Symbol;Acc:HGNC:3211]
8	143597043	143597596	554	WT_un_S5_peak_8191b	58	3.92387	5.82489	2.51821	407	Promoter (<=1kb)	143579697	143597388	17692	-	ENSG00000104529	ENST00000317198	0	EEF1D	eukaryotic translation elongation factor 1 delta [Source:HGNC Symbol;Acc:HGNC:3211]
8	9002388	9002656	269	WT_un_S5_peak_7766	26	3.09502	2.69119	0	38	Promoter (<=1kb)	9002844	9033338	30495	+	ENSG00000104626	ENST00000519292	-188	ERI1	exoribonuclease 1 [Source:HGNC Symbol;Acc:HGNC:23994]
8	30812530	30812972	443	WT_un_S5_peak_7849	43	3.52689	4.33257	1.20064	250	Promoter (<=1kb)	30785616	30812597	26982	-	ENSG00000104695	ENST00000518564	0	PPP2CB	protein phosphatase 2 catalytic subunit beta [Source:HGNC Symbol;Acc:HGNC:9300]
8	15540018	15540732	715	WT_un_S5_peak_7796a	86	6.02131	8.60744	5.05654	174	Promoter (<=1kb)	15540223	15766649	226427	+	ENSG00000104723	ENST00000382020	0	TUSC3	tumor suppressor candidate 3 [Source:HGNC Symbol;Acc:HGNC:30242]
8	15540018	15540732	715	WT_un_S5_peak_7796b	79	5.97467	7.99793	4.48953	448	Promoter (<=1kb)	15540223	15766649	226427	+	ENSG00000104723	ENST00000382020	0	TUSC3	tumor suppressor candidate 3 [Source:HGNC Symbol;Acc:HGNC:30242]
8	47959984	47961326	1343	WT_un_S5_peak_7885a	93	5.35178	9.31879	5.72445	216	Promoter (<=1kb)	47960185	47962327	2143	+	ENSG00000104738	ENST00000518221	0	MCM4	minichromosome maintenance complex component 4 [Source:HGNC Symbol;Acc:HGNC:6947]
8	47959984	47961326	1343	WT_un_S5_peak_7885b	117	5.55358	11.7967	8.07046	980	Promoter (<=1kb)	47960185	47962327	2143	+	ENSG00000104738	ENST00000518221	0	MCM4	minichromosome maintenance complex component 4 [Source:HGNC Symbol;Acc:HGNC:6947]
19	43764787	43765436	650	WT_un_S5_peak_4091	43	3.5241	4.31451	1.1925	456	Downstream (1-2kb)	43766533	43768977	2445	-	ENSG00000104783	ENST00000600909	3541	KCNN4	potassium calcium-activated channel subfamily N member 4 [Source:HGNC Symbol;Acc:HGNC:6293]
19	38835705	38836219	515	WT_un_S5_peak_4022	24	2.6692	2.45659	0	492	Promoter (1-2kb)	38836395	38837585	1191	-	ENSG00000104824	ENST00000595804	1366	HNRNPL	heterogeneous nuclear ribonucleoprotein L [Source:HGNC Symbol;Acc:HGNC:5045]
19	38838140	38839622	1483	WT_un_S5_peak_4023	34	3.46391	3.46542	0.49354	1225	Promoter (<=1kb)	38836389	38839664	3276	-	ENSG00000104824	ENST00000595443	42	HNRNPL	heterogeneous nuclear ribonucleoprotein L [Source:HGNC Symbol;Acc:HGNC:5045]
19	38849028	38850159	1132	WT_un_S5_peak_4026a	35	3.2222	3.51479	0.53357	185	Promoter (<=1kb)	38836370	38849986	13617	-	ENSG00000104824	ENST00000221419	0	HNRNPL	heterogeneous nuclear ribonucleoprotein L [Source:HGNC Symbol;Acc:HGNC:5045]
19	38849028	38850159	1132	WT_un_S5_peak_4026b	198	8.49497	19.8158	15.7892	814	Promoter (<=1kb)	38836370	38849986	13617	-	ENSG00000104824	ENST00000221419	0	HNRNPL	heterogeneous nuclear ribonucleoprotein L [Source:HGNC Symbol;Acc:HGNC:5045]
19	38930546	38931102	557	WT_un_S5_peak_4027	39	3.25604	3.90792	0.84501	205	Promoter (<=1kb)	38915266	38930763	15498	-	ENSG00000104835	ENST00000221431	0	SARS2	seryl-tRNA synthetase 2, mitochondrial [Source:HGNC Symbol;Acc:HGNC:17697]
19	49453368	49453997	630	WT_un_S5_peak_4143	116	6.66565	11.6771	7.95722	249	Promoter (<=1kb)	49446369	49453494	7126	-	ENSG00000104872	ENST00000596049	0	PIH1D1	PIH1 domain containing 1 [Source:HGNC Symbol;Acc:HGNC:26075]
19	45406019	45406287	269	WT_un_S5_peak_4102	43	3.2929	4.33276	1.20064	122	Promoter (<=1kb)	45394653	45406309	11657	-	ENSG00000104881	ENST00000585905	22	PPP1R13L	protein phosphatase 1 regulatory subunit 13 like [Source:HGNC Symbol;Acc:HGNC:18838]
19	2236654	2237053	400	WT_un_S5_peak_3826	33	3.05288	3.30737	0.35013	327	Promoter (<=1kb)	2233155	2236665	3511	-	ENSG00000104886	ENST00000589791	0	PLEKHJ1	pleckstrin homology domain containing J1 [Source:HGNC Symbol;Acc:HGNC:18211]
19	12806457	12806939	483	WT_un_S5_peak_3897	46	3.70459	4.60098	1.42239	229	Promoter (<=1kb)	12806584	12813640	7057	+	ENSG00000104889	ENST00000221486	0	RNASEH2A	ribonuclease H2 subunit A [Source:HGNC Symbol;Acc:HGNC:18518]
19	2269155	2269933	779	WT_un_S5_peak_3827	342	13.1732	34.2081	29.8575	320	Promoter (<=1kb)	2269509	2273488	3980	+	ENSG00000104904	ENST00000590943	0	OAZ1	ornithine decarboxylase antizyme 1 [Source:HGNC Symbol;Acc:HGNC:8095]
19	13150276	13150698	423	WT_un_S5_peak_3904	35	3.23863	3.57756	0.56548	270	Promoter (<=1kb)	13144058	13150287	6230	-	ENSG00000104915	ENST00000591843	0	STX10	syntaxin 10 [Source:HGNC Symbol;Acc:HGNC:11428]
19	49877116	49877506	391	WT_un_S5_peak_4161	25	2.76105	2.57922	0	113	Promoter (<=1kb)	49877425	49888749	11325	+	ENSG00000104946	ENST00000622860	0	TBC1D17	TBC1 domain family member 17 [Source:HGNC Symbol;Acc:HGNC:25699]
19	49929098	49929941	844	WT_un_S5_peak_4162	65	4.98138	6.55207	3.16577	248	Promoter (<=1kb)	49889654	49929416	39763	-	ENSG00000104951	ENST00000601717	0	IL4I1	interleukin 4 induced 1 [Source:HGNC Symbol;Acc:HGNC:19094]
19	49851840	49852145	306	WT_un_S5_peak_4155	39	3.49373	3.95231	0.88518	147	Promoter (<=1kb)	49851953	49855065	3113	+	ENSG00000104960	ENST00000594640	0	PTOV1	PTOV1 extended AT-hook containing adaptor protein [Source:HGNC Symbol;Acc:HGNC:9632]
19	49855064	49855879	816	WT_un_S5_peak_4156	46	3.99126	4.60285	1.42296	560	Promoter (<=1kb)	49855055	49858114	3060	+	ENSG00000104960	ENST00000600105	9	PTOV1	PTOV1 extended AT-hook containing adaptor protein [Source:HGNC Symbol;Acc:HGNC:9632]
19	49856519	49857141	623	WT_un_S5_peak_4157	47	3.79767	4.72691	1.54018	165	Promoter (<=1kb)	49857043	49858863	1821	+	ENSG00000104960	ENST00000596424	0	PTOV1	PTOV1 extended AT-hook containing adaptor protein [Source:HGNC Symbol;Acc:HGNC:9632]
19	49857503	49857906	404	WT_un_S5_peak_4158	29	2.84256	2.9599	0.06978	205	Promoter (<=1kb)	49857907	49860742	2836	+	ENSG00000104960	ENST00000601093	-1	PTOV1	PTOV1 extended AT-hook containing adaptor protein [Source:HGNC Symbol;Acc:HGNC:9632]
19	49817400	49818366	967	WT_un_S5_peak_4154a	79	4.16913	7.99138	4.48953	264	Promoter (<=1kb)	49818282	49818882	601	+	ENSG00000104973	ENST00000593595	0	MED25	mediator complex subunit 25 [Source:HGNC Symbol;Acc:HGNC:28845]
19	49817400	49818366	967	WT_un_S5_peak_4154b	24	2.303	2.41987	0	609	Promoter (<=1kb)	49818282	49818882	601	+	ENSG00000104973	ENST00000593595	0	MED25	mediator complex subunit 25 [Source:HGNC Symbol;Acc:HGNC:28845]
19	49817400	49818366	967	WT_un_S5_peak_4154c	38	3.43265	3.81524	0.77032	786	Promoter (<=1kb)	49818282	49818882	601	+	ENSG00000104973	ENST00000593595	0	MED25	mediator complex subunit 25 [Source:HGNC Symbol;Acc:HGNC:28845]
19	7943349	7944161	813	WT_un_S5_peak_3855	46	4.03504	4.66421	1.48129	188	Promoter (<=1kb)	7926718	7943666	16949	-	ENSG00000104980	ENST00000270538	0	TIMM44	translocase of inner mitochondrial membrane 44 [Source:HGNC Symbol;Acc:HGNC:17316]
19	14136293	14136784	492	WT_un_S5_peak_3914	75	4.66745	7.53305	4.06575	225	Promoter (<=1kb)	14119512	14136589	17078	-	ENSG00000105011	ENST00000263382	0	ASF1B	anti-silencing function 1B histone chaperone [Source:HGNC Symbol;Acc:HGNC:20996]
19	50025034	50025349	316	WT_un_S5_peak_4163	52	4.45402	5.26687	2.01803	175	Promoter (<=1kb)	49981700	50025327	43628	-	ENSG00000105053	ENST00000594092	0	VRK3	VRK serine/threonine kinase 3 [Source:HGNC Symbol;Acc:HGNC:18996]
19	16628526	16628909	384	WT_un_S5_peak_3940	24	2.303	2.41987	0	259	Promoter (<=1kb)	16577557	16629062	51506	-	ENSG00000105085	ENST00000598608	153	MED26	mediator complex subunit 26 [Source:HGNC Symbol;Acc:HGNC:2376]
19	15116068	15116544	477	WT_un_S5_peak_3924	25	2.76105	2.57922	0	119	Promoter (<=1kb)	15115860	15116680	821	-	ENSG00000105135	ENST00000596093	136	ILVBL	ilvB acetolactate synthase like [Source:HGNC Symbol;Acc:HGNC:6041]
19	15125193	15125594	402	WT_un_S5_peak_3925	24	2.55901	2.44511	0	124	Promoter (<=1kb)	15120011	15125362	5352	-	ENSG00000105135	ENST00000527093	0	ILVBL	ilvB acetolactate synthase like [Source:HGNC Symbol;Acc:HGNC:6041]
19	29605877	29606691	815	WT_un_S5_peak_3984	147	8.02944	14.7457	10.8812	354	Promoter (<=1kb)	29606283	29609242	2960	+	ENSG00000105171	ENST00000586173	0	POP4	POP4 homolog, ribonuclease P/MRP subunit [Source:HGNC Symbol;Acc:HGNC:30081]
19	39435518	39436421	904	WT_un_S5_peak_4033	329	12.2584	32.9805	28.6529	417	Promoter (<=1kb)	39433137	39435949	2813	-	ENSG00000105193	ENST00000251453	0	RPS16	ribosomal protein S16 [Source:HGNC Symbol;Acc:HGNC:10396]
19	39480604	39480965	362	WT_un_S5_peak_4034	63	4.50832	6.32909	2.97405	188	Promoter (<=1kb)	39480838	39493779	12942	+	ENSG00000105197	ENST00000607714	0	TIMM50	translocase of inner mitochondrial membrane 50 [Source:HGNC Symbol;Acc:HGNC:23656]
19	39846152	39846542	391	WT_un_S5_peak_4035	81	5.37125	8.17721	4.66188	202	Promoter (<=1kb)	39834458	39846379	11922	-	ENSG00000105202	ENST00000221801	0	FBL	fibrillarin [Source:HGNC Symbol;Acc:HGNC:3599]
19	4246994	4247395	402	WT_un_S5_peak_3839	49	4.22019	4.92356	1.71247	229	Promoter (<=1kb)	4247080	4269088	22009	+	ENSG00000105248	ENST00000262962	0	YJU2	YJU2 splicing factor homolog [Source:HGNC Symbol;Acc:HGNC:25518]
19	46772955	46773255	301	WT_un_S5_peak_4118	28	3.00051	2.85297	0	85	Intron (ENST00000600646/ENSG00000181027, intron 3 of 3)	46777211	46784786	7576	-	ENSG00000105281	ENST00000593713	11531	SLC1A5	solute carrier family 1 member 5 [Source:HGNC Symbol;Acc:HGNC:10943]
19	46781481	46781770	290	WT_un_S5_peak_4119	40	3.5402	4.02122	0.94915	152	Intron (ENST00000542575/ENSG00000105281, intron 4 of 7)	46777211	46784786	7576	-	ENSG00000105281	ENST00000593713	3016	SLC1A5	solute carrier family 1 member 5 [Source:HGNC Symbol;Acc:HGNC:10943]
19	46784246	46785163	918	WT_un_S5_peak_4120	44	4.19238	4.45165	1.28046	252	Promoter (<=1kb)	46774885	46784824	9940	-	ENSG00000105281	ENST00000434726	0	SLC1A5	solute carrier family 1 member 5 [Source:HGNC Symbol;Acc:HGNC:10943]
19	46786546	46786814	269	WT_un_S5_peak_4121	36	3.31942	3.6957	0.65998	148	Promoter (<=1kb)	46774924	46787342	12419	-	ENSG00000105281	ENST00000412532	528	SLC1A5	solute carrier family 1 member 5 [Source:HGNC Symbol;Acc:HGNC:10943]
19	46787108	46787782	675	WT_un_S5_peak_4122	53	4.53212	5.36092	2.10295	161	Promoter (<=1kb)	46774924	46787342	12419	-	ENSG00000105281	ENST00000412532	0	SLC1A5	solute carrier family 1 member 5 [Source:HGNC Symbol;Acc:HGNC:10943]
19	46787974	46788832	859	WT_un_S5_peak_4123	540	20.9396	54.0109	49.3264	568	Promoter (<=1kb)	46774883	46788594	13712	-	ENSG00000105281	ENST00000542575	0	SLC1A5	solute carrier family 1 member 5 [Source:HGNC Symbol;Acc:HGNC:10943]
19	47256328	47256803	476	WT_un_S5_peak_4129	70	4.663	7.04744	3.6188	233	Promoter (<=1kb)	47256523	47273701	17179	+	ENSG00000105321	ENST00000643617	0	CCDC9	coiled-coil domain containing 9 [Source:HGNC Symbol;Acc:HGNC:24560]
19	47257106	47257840	735	WT_un_S5_peak_4130	42	3.74733	4.26024	1.14417	449	Promoter (<=1kb)	47257532	47260762	3231	+	ENSG00000105321	ENST00000599398	0	CCDC9	coiled-coil domain containing 9 [Source:HGNC Symbol;Acc:HGNC:24560]
19	41256629	41256897	269	WT_un_S5_peak_4050	31	3.23343	3.16024	0.2404	151	Intron (ENST00000301178/ENSG00000167601, intron 18 of 19)	41262496	41307598	45103	+	ENSG00000105323	ENST00000352456	-5599	HNRNPUL1	heterogeneous nuclear ribonucleoprotein U like 1 [Source:HGNC Symbol;Acc:HGNC:17011]
19	41263326	41264856	1531	WT_un_S5_peak_4051a	50	3.98311	5.08049	1.8432	148	Promoter (<=1kb)	41264372	41307038	42667	+	ENSG00000105323	ENST00000378215	0	HNRNPUL1	heterogeneous nuclear ribonucleoprotein U like 1 [Source:HGNC Symbol;Acc:HGNC:17011]
19	41263326	41264856	1531	WT_un_S5_peak_4051b	76	5.38749	7.67276	4.19448	566	Promoter (<=1kb)	41264372	41307038	42667	+	ENSG00000105323	ENST00000378215	0	HNRNPUL1	heterogeneous nuclear ribonucleoprotein U like 1 [Source:HGNC Symbol;Acc:HGNC:17011]
19	41263326	41264856	1531	WT_un_S5_peak_4051c	75	4.89556	7.53305	4.06575	1163	Promoter (<=1kb)	41264372	41307038	42667	+	ENSG00000105323	ENST00000378215	0	HNRNPUL1	heterogeneous nuclear ribonucleoprotein U like 1 [Source:HGNC Symbol;Acc:HGNC:17011]
19	41265140	41265854	715	WT_un_S5_peak_4052	40	3.63653	4.09083	0.99096	269	Promoter (<=1kb)	41265122	41307019	41898	+	ENSG00000105323	ENST00000263367	18	HNRNPUL1	heterogeneous nuclear ribonucleoprotein U like 1 [Source:HGNC Symbol;Acc:HGNC:17011]
19	41275024	41275412	389	WT_un_S5_peak_4053	28	2.73871	2.85297	0	216	Promoter (<=1kb)	41276270	41278443	2174	+	ENSG00000105323	ENST00000600332	-858	HNRNPUL1	heterogeneous nuclear ribonucleoprotein U like 1 [Source:HGNC Symbol;Acc:HGNC:17011]
19	41276684	41277042	359	WT_un_S5_peak_4054	25	2.76105	2.57922	0	216	Promoter (<=1kb)	41276270	41278443	2174	+	ENSG00000105323	ENST00000600332	414	HNRNPUL1	heterogeneous nuclear ribonucleoprotein U like 1 [Source:HGNC Symbol;Acc:HGNC:17011]
19	47226000	47227635	1636	WT_un_S5_peak_4127a	558	15.3053	55.8824	51.1651	310	Promoter (<=1kb)	47221645	47227189	5545	-	ENSG00000105327	ENST00000598636	0	BBC3	BCL2 binding component 3 [Source:HGNC Symbol;Acc:HGNC:17868]
19	47226000	47227635	1636	WT_un_S5_peak_4127b	57	3.86264	5.72083	2.42197	1132	Promoter (<=1kb)	47221645	47227189	5545	-	ENSG00000105327	ENST00000598636	0	BBC3	BCL2 binding component 3 [Source:HGNC Symbol;Acc:HGNC:17868]
19	47243683	47244016	334	WT_un_S5_peak_4128	23	2.55582	2.30586	0	233	Distal Intergenic	47220824	47232766	11943	-	ENSG00000105327	ENST00000449228	-10917	BBC3	BCL2 binding component 3 [Source:HGNC Symbol;Acc:HGNC:17868]
19	41439478	41440082	605	WT_un_S5_peak_4058	52	4.13275	5.24005	1.99302	290	Promoter (<=1kb)	41431318	41439910	8593	-	ENSG00000105341	ENST00000438807	0	DMAC2	distal membrane arm assembly complex 2 [Source:HGNC Symbol;Acc:HGNC:25496]
19	41873107	41873917	811	WT_un_S5_peak_4064	35	2.81625	3.53412	0.53357	197	Distal Intergenic	41877279	41881372	4094	+	ENSG00000105369	ENST00000221972	-3362	CD79A	CD79a molecule [Source:HGNC Symbol;Acc:HGNC:1698]
19	41859839	41861086	1248	WT_un_S5_peak_4060a	162	8.50008	16.2062	12.2944	419	Promoter (<=1kb)	41860255	41861606	1352	+	ENSG00000105372	ENST00000598466	0	RPS19	ribosomal protein S19 [Source:HGNC Symbol;Acc:HGNC:10402]
19	41859839	41861086	1248	WT_un_S5_peak_4060b	32	3.26969	3.20815	0.28334	1107	Promoter (<=1kb)	41860255	41861606	1352	+	ENSG00000105372	ENST00000598466	0	RPS19	ribosomal protein S19 [Source:HGNC Symbol;Acc:HGNC:10402]
19	47743293	47743802	510	WT_un_S5_peak_4132	40	3.31916	4.00397	0.93477	149	Promoter (1-2kb)	47745546	47757058	11513	+	ENSG00000105373	ENST00000246802	-1744	NOP53	NOP53 ribosome biogenesis factor [Source:HGNC Symbol;Acc:HGNC:4333]
19	47745419	47745807	389	WT_un_S5_peak_4133	82	5.09454	8.24909	4.73286	207	Promoter (<=1kb)	47745546	47757058	11513	+	ENSG00000105373	ENST00000246802	0	NOP53	NOP53 ribosome biogenesis factor [Source:HGNC Symbol;Acc:HGNC:4333]
19	10380738	10381080	343	WT_un_S5_peak_3870	28	2.96513	2.85374	0	287	Promoter (<=1kb)	10368164	10380572	12409	-	ENSG00000105397	ENST00000531836	-166	TYK2	tyrosine kinase 2 [Source:HGNC Symbol;Acc:HGNC:12440]
19	48469155	48469758	604	WT_un_S5_peak_4137a	23	2.38633	2.34354	0	158	Promoter (<=1kb)	48469208	48482313	13106	+	ENSG00000105443	ENST00000427476	0	CYTH2	cytohesin 2 [Source:HGNC Symbol;Acc:HGNC:9502]
19	48469155	48469758	604	WT_un_S5_peak_4137b	36	3.07067	3.62443	0.59626	424	Promoter (<=1kb)	48469208	48482313	13106	+	ENSG00000105443	ENST00000427476	0	CYTH2	cytohesin 2 [Source:HGNC Symbol;Acc:HGNC:9502]
19	48321727	48322147	421	WT_un_S5_peak_4135	67	4.80384	6.71822	3.31136	230	Promoter (<=1kb)	48296462	48321873	25412	-	ENSG00000105479	ENST00000474199	0	ODAD1	outer dynein arm docking complex subunit 1 [Source:HGNC Symbol;Acc:HGNC:26560]
19	48203774	48204489	716	WT_un_S5_peak_4134	44	3.90533	4.47362	1.30106	632	Promoter (<=1kb)	48180770	48203952	23183	-	ENSG00000105483	ENST00000600800	0	CARD8	caspase recruitment domain family member 8 [Source:HGNC Symbol;Acc:HGNC:17057]
19	48613964	48615167	1204	WT_un_S5_peak_4138a	50	3.98311	5.08049	1.8432	490	Promoter (<=1kb)	48599961	48615076	15116	-	ENSG00000105523	ENST00000263266	0	FAM83E	family with sequence similarity 83 member E [Source:HGNC Symbol;Acc:HGNC:25972]
19	48613964	48615167	1204	WT_un_S5_peak_4138b	50	3.755	5.08049	1.8432	998	Promoter (<=1kb)	48599961	48615076	15116	-	ENSG00000105523	ENST00000263266	0	FAM83E	family with sequence similarity 83 member E [Source:HGNC Symbol;Acc:HGNC:25972]
19	52189941	52190603	663	WT_un_S5_peak_4174	31	3.20179	3.17697	0.25446	159	Promoter (<=1kb)	52190048	52211483	21436	+	ENSG00000105568	ENST00000490868	0	PPP2R1A	protein phosphatase 2 scaffold subunit Aalpha [Source:HGNC Symbol;Acc:HGNC:9302]
19	54115312	54115982	671	WT_un_S5_peak_4182a	46	4.00398	4.61477	1.43357	129	Promoter (<=1kb)	54115410	54131719	16310	+	ENSG00000105618	ENST00000419967	0	PRPF31	pre-mRNA processing factor 31 [Source:HGNC Symbol;Acc:HGNC:15446]
19	54115312	54115982	671	WT_un_S5_peak_4182b	76	5.38749	7.67276	4.19448	527	Promoter (<=1kb)	54115410	54131719	16310	+	ENSG00000105618	ENST00000419967	0	PRPF31	pre-mRNA processing factor 31 [Source:HGNC Symbol;Acc:HGNC:15446]
19	17859696	17860504	809	WT_un_S5_peak_3943	91	5.59251	9.18599	5.60497	220	Promoter (<=1kb)	17859910	17863319	3410	+	ENSG00000105640	ENST00000222247	0	RPL18A	ribosomal protein L18a [Source:HGNC Symbol;Acc:HGNC:10311]
19	18521846	18522114	269	WT_un_S5_peak_3950	39	3.246	3.90314	0.84073	129	Promoter (<=1kb)	18442663	18522070	79408	-	ENSG00000105656	ENST00000262809	0	ELL	elongation factor for RNA polymerase II [Source:HGNC Symbol;Acc:HGNC:23114]
19	18919084	18919664	581	WT_un_S5_peak_3953	30	2.71412	3.07188	0.16046	151	Promoter (<=1kb)	18899514	18919387	19874	-	ENSG00000105669	ENST00000262812	0	COPE	COPI coat complex subunit epsilon [Source:HGNC Symbol;Acc:HGNC:2234]
19	2540877	2541145	269	WT_un_S5_peak_3831	57	3.89301	5.77252	2.47176	132	Promoter (2-3kb)	2538112	2538754	643	+	ENSG00000105694	ENST00000590044	2765	ELOCP28	elongin C pseudogene 28 [Source:HGNC Symbol;Acc:HGNC:49169]
19	42254833	42255319	487	WT_un_S5_peak_4066	69	4.18492	6.9063	3.48859	237	Promoter (<=1kb)	42247569	42255128	7560	-	ENSG00000105722	ENST00000222329	0	ERF	ETS2 repressor factor [Source:HGNC Symbol;Acc:HGNC:3444]
19	19663450	19663890	441	WT_un_S5_peak_3954	70	4.40477	7.08396	3.6527	214	Promoter (<=1kb)	19645198	19663676	18479	-	ENSG00000105726	ENST00000357324	0	ATP13A1	ATPase 13A1 [Source:HGNC Symbol;Acc:HGNC:24215]
19	43526945	43527321	377	WT_un_S5_peak_4086	43	3.52689	4.33257	1.20064	181	Promoter (<=1kb)	43506719	43527201	20483	-	ENSG00000105755	ENST00000292147	0	ETHE1	ETHE1 persulfide dioxygenase [Source:HGNC Symbol;Acc:HGNC:23287]
19	43754646	43755670	1025	WT_un_S5_peak_4090a	50	4.00646	5.05247	1.82837	214	Promoter (<=1kb)	43727983	43754962	26980	-	ENSG00000105771	ENST00000270066	0	SMG9	SMG9 nonsense mediated mRNA decay factor [Source:HGNC Symbol;Acc:HGNC:25763]
19	43754646	43755670	1025	WT_un_S5_peak_4090b	43	3.2929	4.33276	1.20064	927	Promoter (<=1kb)	43727983	43754962	26980	-	ENSG00000105771	ENST00000270066	0	SMG9	SMG9 nonsense mediated mRNA decay factor [Source:HGNC Symbol;Acc:HGNC:25763]
7	32495153	32495664	512	WT_un_S5_peak_7507	39	3.8277	3.95231	0.88518	111	Promoter (<=1kb)	32495426	32552250	56825	+	ENSG00000105778	ENST00000485228	0	AVL9	AVL9 cell migration associated [Source:HGNC Symbol;Acc:HGNC:28994]
7	90346437	90346950	514	WT_un_S5_peak_7589	24	2.89517	2.43654	0	84	Promoter (<=1kb)	90346665	90385890	39226	+	ENSG00000105793	ENST00000257659	0	GTPBP10	GTP binding protein 10 [Source:HGNC Symbol;Acc:HGNC:25106]
7	92831579	92832050	472	WT_un_S5_peak_7593	50	4.33228	5.08882	1.85064	220	Promoter (1-2kb)	92604921	92833917	228997	-	ENSG00000105810	ENST00000265734	1867	CDK6	cyclin dependent kinase 6 [Source:HGNC Symbol;Acc:HGNC:1777]
7	92832704	92833370	667	WT_un_S5_peak_7594	30	3.11882	3.06293	0.15335	475	Promoter (<=1kb)	92604921	92833917	228997	-	ENSG00000105810	ENST00000265734	547	CDK6	cyclin dependent kinase 6 [Source:HGNC Symbol;Acc:HGNC:1777]
7	103297133	103297793	661	WT_un_S5_peak_7630	32	3.23733	3.22608	0.28631	139	Promoter (<=1kb)	103297435	103312415	14981	+	ENSG00000105819	ENST00000428154	0	PMPCB	peptidase, mitochondrial processing subunit beta [Source:HGNC Symbol;Acc:HGNC:9119]
7	106284815	106285585	771	WT_un_S5_peak_7640	59	4.57128	5.95321	2.61777	144	Promoter (<=1kb)	106248298	106284935	36638	-	ENSG00000105835	ENST00000680675	0	NAMPT	nicotinamide phosphoribosyltransferase [Source:HGNC Symbol;Acc:HGNC:30092]
7	19708800	19709218	419	WT_un_S5_peak_7449	56	4.76702	5.69186	2.39319	176	Promoter (<=1kb)	19695461	19709037	13577	-	ENSG00000105849	ENST00000222567	0	POLR1F	RNA polymerase I subunit F [Source:HGNC Symbol;Acc:HGNC:18027]
7	20329690	20331424	1735	WT_un_S5_peak_7453a	52	4.45402	5.26687	2.01803	147	Promoter (<=1kb)	20330702	20410330	79629	+	ENSG00000105855	ENST00000537992	0	ITGB8	integrin subunit beta 8 [Source:HGNC Symbol;Acc:HGNC:6163]
7	20329690	20331424	1735	WT_un_S5_peak_7453b	82	6.15469	8.26277	4.74547	674	Promoter (<=1kb)	20330702	20410330	79629	+	ENSG00000105855	ENST00000537992	0	ITGB8	integrin subunit beta 8 [Source:HGNC Symbol;Acc:HGNC:6163]
7	20329690	20331424	1735	WT_un_S5_peak_7453c	35	2.98733	3.53412	0.53357	995	Promoter (<=1kb)	20330702	20410330	79629	+	ENSG00000105855	ENST00000537992	0	ITGB8	integrin subunit beta 8 [Source:HGNC Symbol;Acc:HGNC:6163]
7	20329690	20331424	1735	WT_un_S5_peak_7453d	58	4.21122	5.86499	2.55229	1307	Promoter (<=1kb)	20330702	20410330	79629	+	ENSG00000105855	ENST00000537992	0	ITGB8	integrin subunit beta 8 [Source:HGNC Symbol;Acc:HGNC:6163]
7	20331658	20332026	369	WT_un_S5_peak_7454	56	4.43738	5.69186	2.39319	130	Promoter (<=1kb)	20331977	20353357	21381	+	ENSG00000105855	ENST00000460204	0	ITGB8	integrin subunit beta 8 [Source:HGNC Symbol;Acc:HGNC:6163]
7	107563786	107564054	269	WT_un_S5_peak_7645	32	3.23733	3.22608	0.28631	132	Promoter (<=1kb)	107563958	107578015	14058	+	ENSG00000105865	ENST00000422290	0	DUS4L	dihydrouridine synthase 4 like [Source:HGNC Symbol;Acc:HGNC:21517]
7	21427335	21427815	481	WT_un_S5_peak_7455	76	5.38749	7.67276	4.19448	207	Promoter (<=1kb)	21428043	21477239	49197	+	ENSG00000105866	ENST00000432066	-228	SP4	Sp4 transcription factor [Source:HGNC Symbol;Acc:HGNC:11209]
7	21617975	21618434	460	WT_un_S5_peak_7456	58	4.55544	5.87154	2.5571	221	Promoter (<=1kb)	21618194	21636078	17885	+	ENSG00000105877	ENST00000465593	0	DNAH11	dynein axonemal heavy chain 11 [Source:HGNC Symbol;Acc:HGNC:2942]
[truncated: 9,380 more rows]

## Sheet: WT_+UV 3h_Ser5P_narrow_peaks
Chromosome	start	end	width	name	score	signalValue	'-log10pvalue	'-log10qvalue	peak_summit	annotation	geneStart	geneEnd	geneLength	geneStrand	geneId	transcriptId	distanceToTSS	geneName	geneDescription
[truncated: 19,544 more rows]

[truncated: 14 more sheets: WT_+ UV 6h_Ser5P_narrow_peaks, WT_+ UV 12h_Ser5P_narrow_peaks, WT_No UV_Ser2P_narrow_peaks, WT_+ UV 3h_Ser2P_narrow_peaks, WT_+ UV 6 h_Ser2P_narrow_peaks, WT_+ UV 12h_Ser2P_narrow_peaks, KD_No UV_Ser5P_narrow_peaks, KD_+ UV 3h_Ser5P_narrow_peaks, KD_+ UV 6h_Ser5P_narrow_peaks, KD_+ UV 12h_Ser5P_narrow_peaks, KD_No UV_Ser2P_narrow_peaks, KD_+ UV 3h_Ser2P_narrow_peaks, KD_+ UV 6h_Ser2P_narrow_peaks, KD_+ UV 12h_Ser2P_narrow_peaks]
