# Supplementary material for: lncRNA-ZFAS1, an emerging gate-keeper in DNA damage-dependent transcriptional regulation
Source: Research Square preprint supplement (doi:10.21203/rs.3.rs-3233912/v1), 2023-09-13
Supplement: Supplementary file 9 [file e1f9e365aad5b4926bdba7c5.xlsx]

## Sheet: mRNA_No UV_cluster 2
transcript_id	gene_id	gene_name	C_0	C_3	C_6	C_9	C_12	C_24
ENST00000355057	ENSG00000197238	HIST1H4J	913.692	11443.6	3062.93	1746.97	2564.47	2010.57
ENST00000614247	ENSG00000277157	HIST1H4D	964.622	9065.64	3846.2	1492.99	2396.38	4066.52
ENST00000618305	ENSG00000275126	HIST1H4L	679.194	8982.68	3252.04	1536.15	2426.08	2782.23
ENST00000621411	ENSG00000274267	HIST1H3B	1044.6	5510.61	2624.64	1215.59	1968.87	2654.92
ENST00000377745	ENSG00000278705	HIST1H4B	293.93	4948.35	1759.22	713.953	1032.6	1173.56
ENST00000611927	ENSG00000273542	HIST1H4K	447.048	4151.09	3577.38	539.346	867.105	2502.49
ENST00000612966	ENSG00000278272	HIST1H3C	391.215	3864.59	1793.86	713.399	1386.04	1389.39
ENST00000377803	ENSG00000197061	HIST1H4C	581.584	3796.86	1999.35	878.623	1367.96	2080.82
ENST00000343677	ENSG00000187837	HIST1H1C	516.624	3685.96	1696.64	738.88	1330.36	1672.79
ENST00000377459	ENSG00000274997	HIST1H2AH	376.968	3670.16	1709.74	738.726	1275.12	1480.57
ENST00000618052	ENSG00000277775	HIST1H3F	370.758	3288.62	1286.35	583.533	965.549	1161.35
ENST00000377727	ENSG00000158406	HIST1H4H	232.198	3211.61	1362.64	476.027	792.047	1176.61
ENST00000369159	ENSG00000203812	HIST2H2AA3	417.033	3080.35	1501.67	634.243	898.896	1038.29
ENST00000356476	ENSG00000197409	HIST1H3D	342.207	2929.78	1255.2	479.572	702.998	1102.6
ENST00000607355	ENSG00000272196	HIST2H2AA4	383.424	2861.06	1394.85	544.697	810.094	909.168
ENST00000616182	ENSG00000274641	HIST1H2BO	264.887	2830.21	1315.34	569.644	1003.06	969.806
ENST00000303910	ENSG00000277075	HIST1H2AE	227.676	2726.96	1346.87	512.254	764.236	1069.49
ENST00000396984	ENSG00000180596	HIST1H2BC	400.644	2699.4	1333.38	629.824	944.754	1222.59
ENST00000356950	ENSG00000197903	HIST1H2BK	482.727	2676.85	1534.55	630.036	1047.18	1261.62
ENST00000359611	ENSG00000278677	HIST1H2AM	357.672	2594.9	1195.02	537.027	1019.39	1083.89
ENST00000359303	ENSG00000197153	HIST1H3J	117.335	2475.15	858.841	349.133	725.408	688.05
ENST00000331442	ENSG00000184357	HIST1H1B	354.515	2463.78	1081.21	467.469	1010.92	1253.57
ENST00000579512	ENSG00000270276	HIST2H4B	0.025093	2388.55	0.093073	8.24813	0.099185	0.113489
ENST00000331380	ENSG00000184260	HIST2H2AC	258.679	2361.44	1048.97	461.924	764.498	742.242
ENST00000304218	ENSG00000168298	HIST1H1E	459.575	2358.28	1143.79	461.636	864.243	1244.88
ENST00000377777	ENSG00000158373	HIST1H2BD	327.39	1735.61	850.38	361.836	596.006	750.804
ENST00000615868	ENSG00000278463	HIST1H2AB	135.676	1625.34	701.189	335.557	555.96	534.042
ENST00000615966	ENSG00000276410	HIST1H2BB	63.1917	1613.66	701.807	237.129	416.868	511.346
ENST00000244534	ENSG00000124575	HIST1H1D	67.3881	1281.4	388.465	142.998	299.077	431.069
ENST00000358739	ENSG00000196747	HIST1H2AI	164.238	1244.18	581.187	229.362	433.066	493.182
ENST00000616365	ENSG00000275379	HIST1H3I	118.378	1023.34	396.812	167.519	329.871	340.36
ENST00000331491	ENSG00000183598	HIST2H3D	71.8173	977.513	394.448	190.458	277.788	367.153
ENST00000541790	ENSG00000273802	HIST1H2BG	66.1179	957.312	392.599	162.067	148.543	258.537
ENST00000369163	ENSG00000278828	HIST1H3H	65.5983	952.028	405.606	143.188	255.291	337.552
ENST00000613854	ENSG00000275714	HIST1H3A	112.471	916.534	334.179	153.81	294.99	313.175
ENST00000339812	ENSG00000124635	HIST1H2BJ	64.3085	905.177	331.242	132.712	224.98	224.826
ENST00000359193	ENSG00000196787	HIST1H2AG	116.059	905.036	429.231	189.153	358.757	402.206
ENST00000618958	ENSG00000275221	HIST1H2AK	104.251	870.836	347.648	186.557	360.319	380.543
ENST00000377733	ENSG00000278588	HIST1H2BI	89.7324	833.399	409.945	165.415	279.643	356.091
ENST00000333151	ENSG00000276368	HIST1H2AJ	59.8405	549.614	301.975	95.6283	175.296	266.418
ENST00000373970	ENSG00000107984	DKK1	239.09	517.566	261.977	200.603	213.049	183.383
ENST00000331128	ENSG00000184270	HIST2H2AB	127.551	498.917	241.582	107.729	167.047	241.286
ENST00000614911	ENSG00000274750	HIST1H3E	63.1175	493.33	238.162	123.894	191.593	232.521
ENST00000369155	ENSG00000184678	HIST2H2BE	52.4063	412.888	167.567	77.3089	116.769	121.988
ENST00000613174	ENSG00000276903	HIST1H2AL	45.7542	401.645	177.52	60.8059	122.541	124.061
ENST00000545683	ENSG00000203814	HIST2H2BF	47.2705	387.637	218.166	77.7738	125.247	168.769
ENST00000361575	ENSG00000198918	RPL39	63.1721	364.011	163.011	61.7771	162.353	35.8979
ENST00000607124	ENSG00000124635	HIST1H2BJ	23.8953	323.272	139.12	51.7443	71.2769	64.3779
ENST00000403683	ENSG00000203852	HIST2H3A	60.2474	286.158	148.126	63.7192	72.4638	111.472
ENST00000369158	ENSG00000203811	HIST2H3C	14.0622	263.893	55.9488	58.8457	16.0712	37.9999
ENST00000356530	ENSG00000277224	HIST1H2BF	32.7306	257.005	101	54.5192	89.9906	92.7229
ENST00000644185	ENSG00000174748	RPL15	100.287	198.82	126.288	63.5442	72.54	145.549
ENST00000590406	ENSG00000152234	ATP5F1A	0	163.503	142.524	0	0	133.935
ENST00000259874	ENSG00000137331	IER3	28.1602	157.748	82.5982	66.6392	48.8404	63.5932
ENST00000503277	ENSG00000163682	RPL9	6.14582	141.934	0.74356	0.885386	8.2963	139.35
ENST00000392951	ENSG00000149591	TAGLN	0.149733	133.161	111.359	100.254	65.1171	67.3789
ENST00000651623	ENSG00000164032	H2AFZ	9.25504	125.734	3.19782	2.80663	20.0213	3.79624
ENST00000531743	ENSG00000149806	FAU	31.0765	122.803	116.559	88.4392	33.8534	29.6792
ENST00000381359	ENSG00000140264	SERF2	31.2803	115.022	74.3571	31.9437	38.3119	31.5272
ENST00000617569	ENSG00000278637	HIST1H4A	85.6235	103.115	75.3606	22.0686	26.5326	44.8568
ENST00000307839	ENSG00000174748	RPL15	13.6966	101.072	15.5031	22.9343	36.485	48.9915
ENST00000371697	ENSG00000148677	ANKRD1	10.8569	99.5584	25.8063	8.66869	6.15287	6.09033
ENST00000243997	ENSG00000124172	ATP5F1E	8.46271	97.1203	91.0971	9.08184	12.5002	12.1595
ENST00000626972	ENSG00000156261	CCT8	1.43627	96.2288	43.9025	57.1265	0.916407	37.7837
ENST00000456793	ENSG00000228474	OST4	0.230897	95.8497	0.172651	0.333973	0.123203	0.605497
ENST00000396953	ENSG00000144713	RPL32	10.1471	93.7777	85.2189	83.4872	31.1256	13.938
ENST00000398881	ENSG00000214736	TOMM6	0.050759	89.6762	1.02679	0.655086	0.432484	0.195804
ENST00000651992	ENSG00000124795	DEK	26.3603	84.4142	16.0922	8.85691	2.82681	43.0934
ENST00000438607	ENSG00000232112	TMA7	28.2731	84.3756	36.1423	47.2509	12.5521	15.9597
ENST00000394667	ENSG00000109475	RPL34	22.7691	72.9519	57.3167	8.54532	7.95995	76.6617
ENST00000272542	ENSG00000144136	SLC20A1	61.3563	70.6221	57.8769	31.2228	26.4913	33.5439
ENST00000334047	ENSG00000117525	F3	20.0686	67.9682	33.6879	21.4042	14.2499	12.8014
ENST00000396634	ENSG00000206503	HLA-A	45.0518	65.9609	49.9089	0.95954	87.4288	0.904512
ENST00000353703	ENSG00000166913	YWHAB	17.1884	64.5894	4.88725	5.65919	10.7849	3.52765
ENST00000279259	ENSG00000149806	FAU	8.41966	57.7496	18.2141	17.1717	39.1443	16.8373
ENST00000315717	ENSG00000163466	ARPC2	18.7037	57.4861	18.9892	21.5548	29.6061	17.4606
ENST00000622074	ENSG00000166923	GREM1	0	55.1956	35.817	13.4415	7e-06	8.43818
ENST00000257904	ENSG00000135446	CDK4	47.9662	53.234	40.2879	27.849	27.8304	19.8751
ENST00000559463	ENSG00000108107	RPL28	1.88417	52.7135	19.6637	6.91414	1.62234	11.0641
ENST00000230990	ENSG00000113070	HBEGF	21.6121	50.59	11.0227	9.00739	9.9895	11.0772
ENST00000358432	ENSG00000142627	EPHA2	24.3516	47.8578	39.7963	27.9389	20.7812	22.9735
ENST00000366695	ENSG00000181218	HIST3H2A	4.32041	45.8337	25.7922	11.784	21.6083	18.9132
ENST00000635200	ENSG00000282988	AL031777.3	5.14702	41.8423	18.6491	11.5963	16.4579	14.5727
ENST00000621112	ENSG00000273703	HIST1H2BM	1.23388	41.7117	23.1459	4.97621	7.38294	12.429
ENST00000613659	ENSG00000276023	DUSP14	33.5043	40.1639	34.7973	12.3796	24.2294	21.2998
ENST00000369583	ENSG00000138166	DUSP5	13.3651	38.2986	19.5676	12.6779	9.3294	9.45572
ENST00000534380	ENSG00000104529	EEF1D	28.4281	37.6964	3.7e-05	15.7832	21.4427	0
ENST00000420463	ENSG00000063046	EIF4B	8.06583	37.1885	6.06418	3.47278	5.39755	33.456
ENST00000300035	ENSG00000166803	PCLAF	15.4214	35.5241	21.0145	5.87003	15.6238	17.3143
ENST00000420826	ENSG00000188612	SUMO2	11.2612	34.3028	33.4648	9.17948	38.7809	9.96247
ENST00000367274	ENSG00000077152	UBE2T	15.3567	33.8954	27.3298	21.3317	16.6709	10.3421
ENST00000645119	ENSG00000122406	RPL5	8.98343	33.4238	10.7756	8.62564	8.08832	11.1812
ENST00000456319	ENSG00000143933	CALM2	7.57315	32.1692	26.9904	13.7065	21.4302	16.3395
ENST00000256496	ENSG00000134108	ARL8B	0.948112	30.9513	0.064401	7.94788	0.081305	0.036932
ENST00000481273	ENSG00000112655	PTK7	26.9979	30.4396	14.6204	0.803249	0.277	23.0511
ENST00000367029	ENSG00000123689	G0S2	4.62235	27.7938	26.1241	13.6355	10.07	10.747
ENST00000379375	ENSG00000078401	EDN1	4.29724	25.3346	10.6821	5.05671	3.77651	8.42291
ENST00000457692	ENSG00000197632	SERPINB2	0.009537	24.6685	16.1046	0.034717	0.004821	0.036623
ENST00000416016	ENSG00000132507	EIF5A	18.5907	24.0685	17.2448	11.5355	11.2557	9.91715
ENST00000417391	ENSG00000079246	XRCC5	10.1117	24.0039	21.9659	15.0109	5.54251	11.3789
ENST00000442551	ENSG00000101182	PSMA7	21.003	23.9517	22.6182	0.396529	14.662	14.0982
ENST00000303924	ENSG00000170961	HAS2	3.16536	23.9259	21.832	3.99038	1.49751	1.23461
ENST00000523500	ENSG00000120885	CLU	4.44982	23.6513	19.6398	9.46925	2.11287	5.685
ENST00000296277	ENSG00000163923	RPL39L	7.6905	23.3215	13.7771	10.591	8.71371	10.9912
ENST00000426333	ENSG00000108883	EFTUD2	12.775	22.8067	4.61689	11.5985	6.07104	5.3879
ENST00000460189	ENSG00000142657	PGD	15.3566	22.4182	18.7073	0.484461	0.378138	17.1086
ENST00000577565	ENSG00000128739	SNRPN	17.6807	22.1479	0	20.093	0	0
ENST00000549748	ENSG00000135390	ATP5MC2	2.37953	21.8863	21.1162	13.1222	16.6811	0.180143
ENST00000264563	ENSG00000095752	IL11	11.9997	21.1816	9.73817	7.44393	5.59102	5.12423
ENST00000481445	ENSG00000131174	COX7B	4.58182	21.1778	6.92082	7.24619	6.46277	6.50809
ENST00000615697	ENSG00000176731	C8orf59	2.61788	20.4188	16.9578	4.13011	5.66664	21.0358
ENST00000381132	ENSG00000159200	RCAN1	14.0151	19.9149	11.0157	7.07087	10.0915	7.92796
ENST00000343986	ENSG00000171858	RPS21	5.41389	19.7834	8.48207	8.19952	7.22716	10.4681
ENST00000256443	ENSG00000134058	CDK7	11.2307	19.3913	14.1777	16.3466	11.841	1.97144
ENST00000222725	ENSG00000106003	LFNG	4.25043	18.6589	4.66412	2.87114	3.02234	2.28227
ENST00000577035	ENSG00000170296	GABARAP	12.8979	18.6071	2.31334	4.33172	11.4795	2.84442
ENST00000434197	ENSG00000010270	STARD3NL	2.97217	17.7238	2.99647	1.63629	7.43966	6.98341
ENST00000243498	ENSG00000123737	EXOSC9	0.208894	17.1686	0.00568	0.105831	0.608532	0.034063
ENST00000409581	ENSG00000138386	NAB1	2.33649	17.1579	8.7802	6.83172	7.92023	3.63983
ENST00000620924	ENSG00000102471	NDFIP2	11.9683	17.1577	14.5211	14.8921	8.92951	0.049572
ENST00000274137	ENSG00000145494	NDUFS6	0.234369	16.765	0.12984	0.143814	0.439044	7.85137
ENST00000615985	ENSG00000124459	ZNF45	8.61048	16.5148	7.13767	5.3842	13.4222	3.82823
ENST00000341259	ENSG00000111252	SH2B3	7.17367	16.43	14.6144	6.89664	4.0592	4.1598
ENST00000266581	ENSG00000139211	AMIGO2	8.13132	16.2178	10.2498	4.25952	3.56345	5.32982
ENST00000550413	ENSG00000139211	AMIGO2	12.9118	16.0111	12.026	5.91915	3.93527	4.54554
ENST00000202834	ENSG00000089063	TMEM230	6.35055	15.6387	7.04454	7.69627	7.3742	6.91866
ENST00000392910	ENSG00000159840	ZYX	0.089682	15.0157	0.189686	0.399325	0.112678	0.167467
ENST00000256759	ENSG00000134363	FST	2.52109	14.8808	7.52468	1.39235	1.96154	1.96436
ENST00000379299	ENSG00000089063	TMEM230	3.55321	14.094	5.18888	5.07363	4.4156	6.25377
ENST00000263895	ENSG00000115963	RND3	4.38162	14.0908	9.06534	4.92354	5.81714	4.11432
ENST00000357847	ENSG00000146416	AIG1	2.16661	14.0737	2.63647	4.06364	9.35749	3.17538
ENST00000286800	ENSG00000156273	BACH1	9.59895	13.4229	5.29104	5.20773	5.14115	5.26879
ENST00000368276	ENSG00000260238	PMF1-BGLAP	0.763175	12.8565	0.99816	0.713518	1.49483	1.57516
ENST00000371514	ENSG00000116171	SCP2	7.44365	12.6365	4.00249	5.06247	2.05288	1.1287
ENST00000323374	ENSG00000176170	SPHK1	5.38632	12.5819	9.41944	5.96255	10.499	2.42238
ENST00000382519	ENSG00000010278	CD9	0	12.4385	6.84913	14.0789	0	0
ENST00000296632	ENSG00000164211	STARD4	7.75614	12.4363	5.37969	4.42429	4.16924	6.38798
ENST00000599134	ENSG00000105202	FBL	0	12.0082	5.94772	0	0	3.77187
ENST00000349893	ENSG00000105669	COPE	7.91539	11.8472	0	2.42271	6.87808	1.38925
ENST00000405375	ENSG00000124762	CDKN1A	7.84636	11.2958	7.42722	2.53369	6.21654	4.33699
ENST00000548563	ENSG00000196531	NACA	6.93785	11.2302	10.2175	8.32361	4.75208	5.12203
ENST00000367909	ENSG00000117152	RGS4	0.926995	11.0998	5.05003	3.99146	1.99281	0.784197
ENST00000592299	ENSG00000176170	SPHK1	3.73185	11.0589	6.19735	5.18907	4.71872	3.1206
ENST00000562238	ENSG00000167969	ECI1	5.46871	11.0185	9.50882	6.50486	3.72455	5.94297
ENST00000568671	ENSG00000172775	FAM192A	0.780947	10.909	7.42447	2.02039	2.39999	1.81734
ENST00000455785	ENSG00000117632	STMN1	5.34986	10.5853	0.608586	0.568801	4.66977	3.88638
ENST00000392496	ENSG00000176170	SPHK1	2.30223	10.1681	9.14888	5.28904	6.25485	1.93012
ENST00000370885	ENSG00000171311	EXOSC1	2.27618	9.9808	2.42464	3.09063	2.52268	6.24251
ENST00000512160	ENSG00000164211	STARD4	1.41953	9.89218	8.09459	6.03345	0.676587	8.78514
ENST00000369838	ENSG00000198478	SH3BGRL2	9.33917	9.82243	8.20379	5.80778	4.18163	4.0315
ENST00000225831	ENSG00000108691	CCL2	3.6022	9.80232	2.97698	2.8825	3.52993	4.17622
ENST00000338483	ENSG00000185022	MAFF	3.27188	9.77946	6.76326	0.784407	0.703151	2.79484
ENST00000522563	ENSG00000156831	NSMCE2	2.27598	9.76855	7.75873	3.39869	9.51347	3.07259
ENST00000504226	ENSG00000134363	FST	0.479647	9.73756	5.2909	1.40833	1.24658	0.937493
ENST00000366844	ENSG00000154380	ENAH	5.66266	9.71779	6.51574	5.07236	4.62706	4.02203
ENST00000361690	ENSG00000096063	SRPK1	0.003127	9.65758	0	0	0.214805	0
ENST00000290271	ENSG00000159167	STC1	3.65025	9.37442	6.83851	2.69727	1.56906	2.72188
ENST00000376156	ENSG00000159063	ALG8	4.02342	9.31345	3.10325	3.10102	1.7813	2.56278
ENST00000544379	ENSG00000175768	TOMM5	0.15431	9.2759	0.06423	0.100256	0.067761	0.128925
ENST00000534717	ENSG00000155366	RHOC	0	9.25706	0	0	0	0
ENST00000533729	ENSG00000213465	ARL2	2.29366	9.16216	8.24494	7.26748	4.21859	3.74758
ENST00000580387	ENSG00000265681	RPL17	1.07019	9.16106	4.46041	1.58043	2.53632	2.5547
ENST00000423516	ENSG00000163931	TKT	3.28315	9.15478	8.26089	0	0	0
ENST00000539119	ENSG00000076043	REXO2	0.441639	9.05722	0.625556	0.581604	0.693347	0.549487
ENST00000622051	ENSG00000102804	TSC22D1	6.41702	9.01683	0.515426	0.409622	0.416009	3.88869
ENST00000478464	ENSG00000175110	MRPS22	0.814338	8.97867	1.00424	0.481408	0.928817	0.95091
ENST00000377491	ENSG00000116288	PARK7	2.3943	8.92317	4.37904	5.07908	3.21281	3.36261
ENST00000649787	ENSG00000122218	COPA	0	8.69181	0	0	0	0
ENST00000460469	ENSG00000169251	NMD3	3.28585	8.37217	7.96773	1.72746	2.51715	2.12735
ENST00000514354	ENSG00000145912	NHP2	0	8.35692	0	0	1.53333	1.91532
ENST00000308388	ENSG00000173540	GMPPB	0.173081	8.35334	0.473744	0.704335	0.089663	0.141378
ENST00000312547	ENSG00000130724	CHMP2A	6.34755	8.32818	7.71783	1.87692	2.84358	3.68707
ENST00000611198	ENSG00000102804	TSC22D1	3.70153	8.24925	0.147343	0.062705	0.084179	3.9455
ENST00000651128	ENSG00000171617	ENC1	8.24461	8.20241	7.40471	5.74079	1.3638	3.34818
ENST00000402252	ENSG00000183010	PYCR1	2.06406	8.10773	2.08833	1.3497	2.34067	3.13489
ENST00000505980	ENSG00000145687	SSBP2	3.47724	8.06005	6.12056	1.5413	0.631063	1.6101
ENST00000450622	ENSG00000132432	SEC61G	2.90275	8.00284	5.77211	4.5705	1.95355	4.82913
ENST00000617962	ENSG00000116717	GADD45A	0	7.82517	0	0	0	0
ENST00000379446	ENSG00000111859	NEDD9	3.88484	7.80715	5.81715	2.89046	1.75216	3.33194
ENST00000553968	ENSG00000211448	DIO2	1.18688	7.80031	3.1433	3.38382	0.089636	3.23368
ENST00000563250	ENSG00000140525	FANCI	0	7.78543	0	0	0	0
ENST00000375238	ENSG00000125967	NECAB3	0.820731	7.71633	1.3124	0.781634	4.10073	3.9875
ENST00000518995	ENSG00000147677	EIF3H	0.197492	7.61051	2.37992	0.213363	0.282938	0.002606
ENST00000344700	ENSG00000124614	RPS10	3.14905	7.57384	5.17707	3.9649	1.53682	3.00193
ENST00000317827	ENSG00000147526	TACC1	3.125	7.5532	4.40679	2.41912	2.28796	1.6008
ENST00000389032	ENSG00000211455	STK38L	5.31833	7.4987	4.50675	2.72926	1.75418	1.57339
ENST00000393537	ENSG00000213337	ANKRD39	7.1048	7.48053	2.19171	1.90084	2.62939	2.5734
ENST00000376468	ENSG00000120937	NPPB	3.90117	7.34407	4.64554	3.09479	2.64803	4.16056
ENST00000349721	ENSG00000080503	SMARCA2	2.32863	7.22674	2.00548	1.32911	1.6241	2.03696
ENST00000509597	ENSG00000145725	PPIP5K2	0.764364	7.22226	0.801592	0.680911	0.790498	1.33767
ENST00000618914	ENSG00000120992	LYPLA1	0	7.21729	6.18365	0	0	2.31522
ENST00000351205	ENSG00000172062	SMN1	4.44108	7.17129	0.802808	0.951238	0.741582	0.531858
ENST00000589598	ENSG00000124299	PEPD	6.48484	7.15542	2.25733	3.21469	3.52491	0.859851
ENST00000614696	ENSG00000170312	CDK1	1.86322	7.13263	0	0	0.537401	0
ENST00000495461	ENSG00000113811	SELENOK	0.358585	6.97488	3.26996	0.954614	3.00195	0.228371
ENST00000395748	ENSG00000109321	AREG	2.14378	6.95968	2.3983	0.678602	0.874451	0.929916
ENST00000649813	ENSG00000126267	COX6B1	1.84983	6.94741	3.95527	2.03434	1.42676	2.29793
ENST00000582113	ENSG00000109084	TMEM97	0.2293	6.92162	1.29239	0.329597	0.148951	0.39454
ENST00000548065	ENSG00000181929	PRKAG1	4.35376	6.92133	2.00187	2.38395	1.74579	2.714
ENST00000381103	ENSG00000068796	KIF2A	3.5211	6.9075	1.02842	1.3343	0.605236	0.572066
ENST00000380708	ENSG00000182093	WRB	1.94407	6.8217	1.55472	1.15641	1.44988	1.74375
ENST00000577922	ENSG00000108654	DDX5	0.003974	6.69772	0.007337	0.012882	2.11759	3.90742
ENST00000307407	ENSG00000169429	CXCL8	0.249283	6.56156	0.635279	0.174418	0.073258	0.152808
ENST00000643579	ENSG00000167460	TPM4	2.54565	6.53137	4.72673	0	1.05165	5.87999
ENST00000578444	ENSG00000181610	MRPS23	2.28547	6.52634	0.890468	1.48272	1.28003	2.04216
ENST00000547157	ENSG00000184752	NDUFA12	1.96501	6.51618	4.45715	4.42702	2.92513	3.01752
ENST00000546571	ENSG00000110880	CORO1C	1.76382	6.46493	2.9616	3.05256	1.60889	0.712703
ENST00000649217	ENSG00000172175	MALT1	4.29449	6.46433	3.71919	5.48954	3.48561	0.252788
ENST00000377533	ENSG00000180900	SCRIB	0.069203	6.33122	5.56521	0.005305	0.086061	0.006085
ENST00000391762	ENSG00000170906	NDUFA3	4.41593	6.32402	5.89038	1.39032	2.1e-05	7e-05
ENST00000325509	ENSG00000178860	MSC	2.97102	6.25183	2.43856	1.44831	2.7473	2.89645
ENST00000240851	ENSG00000114354	TFG	1.85476	6.23746	0.736563	0.886219	5.39131	1.17581
ENST00000295927	ENSG00000163661	PTX3	2.01127	6.02929	3.80002	1.96704	1.99176	1.40314
ENST00000523589	ENSG00000120885	CLU	1.58772	6.02296	3.12493	1.80023	5.46889	1.6125
ENST00000542235	ENSG00000173457	PPP1R14B	1.88547	6.00473	5.25763	3.37227	3.3671	2.88596
ENST00000552561	ENSG00000134291	TMEM106C	2.23901	5.98438	2.57868	6.85635	0.204138	0.058485
ENST00000434299	ENSG00000117448	AKR1A1	2.68782	5.92902	1.77788	1.37853	1.07666	0.550757
ENST00000542322	ENSG00000155324	GRAMD2B	0	5.88677	0	0	1.33139	0
ENST00000505236	ENSG00000104856	RELB	1.46207	5.84346	5.00466	2.83561	2.02526	1.13243
ENST00000395260	ENSG00000182010	RTKN2	2.27339	5.82383	4.82558	4.01812	2.29431	2.96454
ENST00000397764	ENSG00000214194	SMIM30	1.17723	5.79556	5.42509	2.24194	2.23058	3.46808
ENST00000428708	ENSG00000175866	BAIAP2	5.06483	5.77545	5.33339	0.778375	0.874991	4.07648
ENST00000266679	ENSG00000111605	CPSF6	0.002721	5.74352	3.7804	0.114212	0.065453	0.089492
ENST00000503118	ENSG00000108829	LRRC59	0.103308	5.74327	0.078774	0.049787	0.035903	4.68715
ENST00000469256	ENSG00000143179	UCK2	3.6831	5.73484	5.16809	4.37089	2.31644	1.94347
ENST00000441964	ENSG00000144647	POMGNT2	0.047715	5.67716	0.075377	0.13378	0.013444	0.049912
ENST00000370794	ENSG00000077254	USP33	0.329165	5.63924	0.358952	0.269683	0.468184	1.82163
ENST00000522566	ENSG00000164930	FZD6	1.21363	5.62875	0.009634	0	0.059383	0.011381
ENST00000396751	ENSG00000166333	ILK	0.654022	5.62169	1.8238	1.41105	4.3144	1.22867
ENST00000536844	ENSG00000003056	M6PR	0	5.59097	0	0	0	3.88244
ENST00000306704	ENSG00000169689	CENPX	0.286818	5.50823	4.47596	4.56136	3.06692	0.66505
ENST00000394817	ENSG00000120725	SIL1	1.97958	5.50655	3.57993	2.3107	2.7923	3.4039
ENST00000646646	ENSG00000133835	HSD17B4	0.08706	5.50092	4.12196	4.09169	0.033731	0
ENST00000513328	ENSG00000087274	ADD1	0	5.47553	0	0.583011	0.502763	0
ENST00000553373	ENSG00000073712	FERMT2	0.908289	5.4025	4.13243	3.73549	3.19716	0.973453
ENST00000618160	ENSG00000111358	GTF2H3	0.093079	5.40081	0.145523	0.134873	0.022891	0.169638
ENST00000322142	ENSG00000115641	FHL2	1.56957	5.38642	4.30676	1.46174	2.2393	1.699
ENST00000426601	ENSG00000138386	NAB1	2.80031	5.3324	1.7166	1.44354	1.92755	2.90358
ENST00000429635	ENSG00000139211	AMIGO2	1.86235	5.28834	3.05032	1.92651	1.05833	1.76273
ENST00000275015	ENSG00000146232	NFKBIE	1.03473	5.28693	0.369095	0.286366	0.270729	0.163022
ENST00000650491	ENSG00000282988	AL031777.3	0	5.27919	0	0.78881	2.2893	3.02945
ENST00000397239	ENSG00000124795	DEK	2.04138	5.2402	1.66968	0.962339	2.58248	2.61211
ENST00000361762	ENSG00000169851	PCDH7	2.89022	5.19628	4.21222	1.37715	1.1961	1.95987
ENST00000368682	ENSG00000010810	FYN	1.86645	5.15961	1.01066	0.443615	0.322032	0.326782
ENST00000398782	ENSG00000125844	RRBP1	0	5.09993	0	0.053204	0.571727	2.45443
ENST00000377482	ENSG00000116285	ERRFI1	3.77804	5.03799	2.29377	1.87291	1.87485	2.51226
ENST00000415826	ENSG00000176485	PLA2G16	1.35185	5.01802	3.56571	3.52372	3.14151	1.45824
ENST00000313806	ENSG00000159200	RCAN1	2.10728	4.99491	1.58857	1.59735	1.75902	1.53661
ENST00000435224	ENSG00000166016	ABTB2	3.60746	4.96586	2.91502	2.20014	2.26312	2.1366
ENST00000379359	ENSG00000102760	RGCC	1.96172	4.95214	1.27306	0.927361	1.43432	1.42347
ENST00000248451	ENSG00000127838	PNKD	0.802579	4.93634	1.76979	1.88865	1.49447	1.53185
ENST00000426291	ENSG00000136244	IL6	0.024197	4.91248	0.726342	0.066482	0.040548	0.090217
ENST00000419585	ENSG00000144554	FANCD2	2.43151	4.87665	1.59743	2.76104	1.02312	1.38906
ENST00000548160	ENSG00000135404	CD63	0.521283	4.8742	0.630379	0.382885	1.08592	0.560494
ENST00000323963	ENSG00000156976	EIF4A2	4.30685	4.83287	2.95325	2.12747	3.48203	0.951851
ENST00000290663	ENSG00000159479	MED8	3.68326	4.81321	0.658811	2.69535	0.816074	0.589347
ENST00000433892	ENSG00000026508	CD44	0.428237	4.81273	0	0.477101	0	0
ENST00000517669	ENSG00000113732	ATP6V0E1	1.31752	4.80725	2.07206	2.47925	1.71393	1.76289
ENST00000377474	ENSG00000178695	KCTD12	3.96462	4.76161	3.83751	2.41045	1.96623	2.17309
ENST00000345985	ENSG00000115761	NOL10	1.56775	4.75767	0.704272	0	0	5.41467
ENST00000476139	ENSG00000171928	TVP23B	5.77743	4.73043	3.48879	3.88695	0.469828	0.645364
ENST00000396980	ENSG00000233822	HIST1H2BN	0.228482	4.72109	1.44086	0.408977	0.799714	0.847614
ENST00000535549	ENSG00000134954	ETS1	3.87431	4.71755	3.43237	1.46025	0.91744	1.41362
ENST00000443561	ENSG00000120913	PDLIM2	2.06037	4.67414	4.03385	3.26245	1.32883	2.75038
ENST00000490975	ENSG00000070087	PFN2	0	4.63573	0.07655	0.036129	0	0
ENST00000488451	ENSG00000119185	ITGB1BP1	0.17804	4.62669	4.42182	1.47987	4.31044	0.061861
ENST00000439109	ENSG00000181019	NQO1	2.7695	4.58868	3.39783	2.77122	4.14982	0
ENST00000435888	ENSG00000175193	PARL	4.31016	4.5616	2.56914	0.562391	4.07931	0.73546
ENST00000261918	ENSG00000138623	SEMA7A	2.73246	4.54095	3.77982	2.74457	2.52981	1.0339
ENST00000602153	ENSG00000105193	RPS16	3.10523	4.53359	3.56294	3.1262	1.27057	1.63401
ENST00000323213	ENSG00000149100	EIF3M	0.562791	4.47659	0.861266	0.761204	0.686834	0.784732
ENST00000299759	ENSG00000166592	RRAD	0.43898	4.44202	0.904722	1.29545	2.26268	1.69
ENST00000614097	ENSG00000274290	HIST1H2BE	0.385779	4.43906	2.13141	0.336658	0.697936	0.939517
ENST00000597451	ENSG00000221983	UBA52	1.33793	4.43552	4.24876	1.99348	2.81	2.47525
ENST00000413996	ENSG00000118515	SGK1	1.84473	4.37024	2.23286	1.81479	1.43408	0.514929
ENST00000388901	ENSG00000166200	COPS2	2.93816	4.34718	3.36609	2.21705	0.611468	1.58272
ENST00000530047	ENSG00000185803	SLC52A2	1.77841	4.3291	1.75334	0.00023	0.997654	0
ENST00000581041	ENSG00000146872	TLK2	0	4.31179	0.203234	0	0	0.311178
ENST00000431010	ENSG00000196639	HRH1	0.215684	4.28875	0.000409	0.525734	1.43069	2.08471
ENST00000379153	ENSG00000112149	CD83	2.96238	4.27969	2.32565	1.56585	2.20884	2.04982
ENST00000513154	ENSG00000152503	TRIM36	2.18956	4.25101	0.481236	0.53771	0.714622	1.00687
ENST00000297661	ENSG00000165006	UBAP1	1.14939	4.24859	0.335184	0.501295	0.222359	0.216095
ENST00000652267	ENSG00000144028	SNRNP200	0	4.21139	3.43422	0	0	0.645878
ENST00000481448	ENSG00000159200	RCAN1	0.01537	4.21004	0.619553	0.076698	0.244558	0.020699
ENST00000203166	ENSG00000249115	HAUS5	0.406152	4.20706	3.84648	0.555035	0.38224	2.93961
ENST00000599962	ENSG00000234289	H2BFS	0.550767	4.18713	2.61586	0.756535	1.28588	0.998742
ENST00000315150	ENSG00000172780	RAB43	3.27292	4.17346	0.079306	4.00314	0.234452	0.064033
ENST00000559519	ENSG00000166803	PCLAF	0.183418	4.17155	1.7219	0.914904	0.63051	0.740534
ENST00000573035	ENSG00000263001	GTF2I	1.94053	4.15035	0	0.026735	0	2.09125
ENST00000265393	ENSG00000106052	TAX1BP1	0.161142	4.13241	0.154324	0.002656	0.889696	0.104181
ENST00000392948	ENSG00000203818	HIST2H3PS2	0.249057	4.10732	1.57326	0.15074	0.001957	0.891043
ENST00000648440	ENSG00000132669	RIN2	0	4.03812	0.531137	0	0	0
ENST00000326274	ENSG00000170162	VGLL2	3.05866	4.0337	2.89731	1.86752	1.42383	1.3786
ENST00000558029	ENSG00000140545	MFGE8	0	4.00772	0	0	0	0
ENST00000510411	ENSG00000169045	HNRNPH1	0.162831	4.00207	1.16183	0.65572	0.094763	0.060965
ENST00000373701	ENSG00000147162	OGT	0.11036	3.96931	0.197292	0.018743	0.031888	0.057658
ENST00000341681	ENSG00000011566	MAP4K3	0.747219	3.88738	0.684453	0.696346	0.913294	0.861927
ENST00000297991	ENSG00000165272	AQP3	1.26119	3.86636	2.90295	2.24302	1.66646	1.08701
ENST00000543042	ENSG00000162129	CLPB	0	3.86352	0	0	0	2.05017
ENST00000396947	ENSG00000134363	FST	0.811285	3.84429	1.41592	0.543838	0.132875	0.308636
ENST00000574451	ENSG00000141127	PRPSAP2	1.52992	3.81753	0.805588	0.051182	0.015517	1.98202
ENST00000258538	ENSG00000136052	SLC41A2	3.32088	3.81349	3.43498	1.38185	0.091896	2.16213
ENST00000249075	ENSG00000128342	LIF	1.21757	3.79719	1.55562	0.881976	1.09966	0.839401
ENST00000504489	ENSG00000163110	PDLIM5	0.668085	3.76619	1.66634	0.498634	0.4825	0.925813
ENST00000381577	ENSG00000120217	CD274	0.506648	3.70375	1.56125	0.919587	0.936132	1.1858
ENST00000524699	ENSG00000174744	BRMS1	0.823155	3.69959	0.495553	1.76066	2.12837	0.882621
ENST00000442035	ENSG00000130985	UBA1	1.25917	3.69719	0.669423	0.466428	0.227253	0.442928
ENST00000310450	ENSG00000173418	NAA20	3.5871	3.67244	2.68019	0.942041	2.34419	0
ENST00000369558	ENSG00000163349	HIPK1	1.00954	3.6723	1.05688	0.159493	0.658495	0.176648
ENST00000644866	ENSG00000138685	FGF2	0.327403	3.62297	0.011005	0.009017	0.003972	0.064526
ENST00000431771	ENSG00000162458	FBLIM1	0.363017	3.62247	3.14262	0.44916	0.691438	0.536727
ENST00000359574	ENSG00000106003	LFNG	1.80036	3.5982	1.22028	0.038539	0.06307	0.067736
ENST00000370207	ENSG00000117525	F3	1.22683	3.55823	1.63444	0.630442	0.473886	0.910415
ENST00000550207	ENSG00000151746	BICD1	2.01244	3.53606	2.54347	2.0833	2.05956	1.24313
ENST00000579793	ENSG00000264343	NOTCH2NLA	0.646419	3.5277	1.01733	0.850756	0.349804	0.429137
ENST00000380649	ENSG00000084754	HADHA	0.864104	3.51351	0.427534	0.405299	2.39406	0.978687
ENST00000543491	ENSG00000169851	PCDH7	2.89054	3.51165	0.764515	0.553676	1.42264	0.51498
ENST00000517956	ENSG00000156804	FBXO32	2.04797	3.49612	1.60797	1.05595	2.08058	1.4856
ENST00000651687	ENSG00000113356	POLR3G	0.288305	3.49573	0.408732	0.46818	0.178022	0.101988
ENST00000357710	ENSG00000080815	PSEN1	0.297781	3.4796	0.279787	0.382607	0.362734	0.847089
ENST00000613626	ENSG00000065883	CDK13	3.49083	3.46082	2.26481	2.75824	0	0
ENST00000526590	ENSG00000182261	NLRP10	3.22335	3.43397	2.6732	1.60381	1.82116	0.965276
ENST00000518856	ENSG00000164620	RELL2	2.92881	3.42857	3.08482	0	0	3.14018
ENST00000542666	ENSG00000059758	CDK17	0.016161	3.4273	0.011894	0	0.017111	1.92081
ENST00000357055	ENSG00000152683	SLC30A6	0.246687	3.41833	0.343186	0	0	0
ENST00000514781	ENSG00000151725	CENPU	0.016822	3.40766	0.003146	0.579594	0.304452	1.75011
ENST00000269576	ENSG00000186395	KRT10	0	3.39441	0	0	0	0
ENST00000217455	ENSG00000101473	ACOT8	1.547	3.39242	2.16383	0.966724	2.94203	0.263467
ENST00000318988	ENSG00000175826	CTDNEP1	1.70851	3.38067	1.48165	0.554201	0.477618	2.65872
ENST00000378714	ENSG00000065328	MCM10	0.646519	3.36335	2.79563	0.031236	0.146458	4.39823
ENST00000429723	ENSG00000124802	EEF1E1	0.876996	3.34237	2.7964	0.583677	2.32094	0.165173
ENST00000409417	ENSG00000120913	PDLIM2	1.13986	3.33429	2.19324	1.97759	0.843656	0
ENST00000610745	ENSG00000138061	CYP1B1	1.77745	3.32695	1.96528	1.3737	0.994174	1.33619
ENST00000567296	ENSG00000132604	TERF2	2.18928	3.32588	1.36226	0.71918	0.966636	0.325963
ENST00000393021	ENSG00000108443	RPS6KB1	0	3.32328	1.79018	0	1.56388	0
ENST00000409813	ENSG00000077044	DGKD	3.79293	3.28413	2.18423	1.3061	1.75635	0.453156
ENST00000378467	ENSG00000065809	FAM107B	0.037307	3.2797	0.845635	0.771437	2.17316	1.03373
ENST00000424946	ENSG00000136052	SLC41A2	6.8e-05	3.2701	0.00072	1.47574	1e-06	2.09596
ENST00000368347	ENSG00000160753	RUSC1	0.684322	3.26234	0.289493	0.460903	0.301537	0.566687
ENST00000556172	ENSG00000100532	CGRRF1	0.031047	3.19038	0.003982	0.003357	0.003566	0.008682
ENST00000248139	ENSG00000197562	RAB40C	2.3526	3.18862	1.15925	0.266656	2.07743	1.19631
ENST00000358201	ENSG00000177548	RABEP2	0.738588	3.16113	0.720634	0	2.20585	1.01794
ENST00000558459	ENSG00000140395	WDR61	1.89231	3.14897	0	0.316889	1.29094	1.74716
ENST00000403007	ENSG00000163001	CFAP36	1.42496	3.12626	1.9036	1.85687	1.68936	0.817872
ENST00000370007	ENSG00000166197	NOLC1	0.063086	3.12584	0.051623	0.019221	0.010803	0.021535
ENST00000643707	ENSG00000174748	RPL15	1.92132	3.11456	1.34022	0.987556	0.882734	0.702219
ENST00000591778	ENSG00000108679	LGALS3BP	0.013317	3.10444	2.94285	0.071568	0.125606	1.70289
ENST00000476201	ENSG00000120948	TARDBP	0.097764	3.08891	0.072592	0.106	0.052932	0.036897
ENST00000374606	ENSG00000204220	PFDN6	1.29124	3.08089	2.95848	0.962934	2.45622	0.517877
ENST00000422344	ENSG00000076604	TRAF4	0	3.07383	0.118743	0.162528	0.036376	0.014034
ENST00000317168	ENSG00000138303	ASCC1	1.78972	3.00744	2.40592	1.16854	3.23947	0.011542
ENST00000644551	ENSG00000127990	SGCE	0.00735	2.99052	0.003973	0.003821	0.038765	2.21928
ENST00000589656	ENSG00000115268	RPS15	1.02188	2.98381	2.15943	0.622114	1.17292	1.47957
ENST00000393079	ENSG00000168917	SLC35G2	2.73644	2.97346	2.54615	0.190231	0.689174	0.14507
ENST00000618628	ENSG00000171617	ENC1	2.45715	2.94984	1.17969	1.43212	0.551059	0.610335
ENST00000558134	ENSG00000140612	SEC11A	1.51302	2.94244	1.78744	0	1.5073	1.3767
ENST00000359265	ENSG00000163110	PDLIM5	0.847412	2.93678	2.01064	0.821754	0.709456	0.560699
ENST00000390683	ENSG00000182185	RAD51B	0.409143	2.91864	2.35423	2.76499	1.64623	0.617466
ENST00000564084	ENSG00000087253	LPCAT2	7.3e-05	2.90509	0.000111	0.000117	7.6e-05	4.5e-05
ENST00000611732	ENSG00000118707	TGIF2	0	2.90144	0.523752	0.02391	0.240702	2.76995
ENST00000646789	ENSG00000162595	DIRAS3	0.582502	2.89041	2.58593	2.18272	1.40626	0.712505
ENST00000373944	ENSG00000122952	ZWINT	2.13388	2.87561	0.478915	0.210122	1.10035	0.887791
ENST00000542088	ENSG00000169718	DUS1L	1.89223	2.86829	1.77613	1.36763	0.91706	0.937785
ENST00000310032	ENSG00000048140	TSPAN17	0.815431	2.86156	1.86892	0.512606	1.11664	1.18866
ENST00000575208	ENSG00000183011	NAA38	0	2.83628	0.082027	0.065119	0	0
ENST00000506445	ENSG00000155324	GRAMD2B	0	2.83523	0.237362	0.007154	0.014943	2.41028
ENST00000432031	ENSG00000180228	PRKRA	1.15326	2.83212	1.83405	2.37641	0.74335	1.08767
ENST00000644744	ENSG00000049130	KITLG	1.83975	2.82924	0.774705	0.941068	1.4751	0.860373
ENST00000557140	ENSG00000100906	NFKBIA	0	2.81587	1.93766	0.924437	1.90291	0.909213
ENST00000279488	ENSG00000139318	DUSP6	1.45131	2.81251	1.59827	0.772659	0.559555	0.997306
ENST00000504432	ENSG00000151247	EIF4E	0.105678	2.81219	0.902325	0.281642	0.548283	0.314212
ENST00000543155	ENSG00000111652	COPS7A	0.47932	2.80956	0.840021	1.06673	0.860259	1.09751
ENST00000515708	ENSG00000048140	TSPAN17	1.30811	2.78978	1.67499	0.952662	1.23178	1.16391
ENST00000311922	ENSG00000173334	TRIB1	1.85286	2.78281	1.90164	1.40697	1.44121	1.07682
ENST00000378034	ENSG00000136108	CKAP2	0.141095	2.78239	0.180542	0.114774	0.191642	0.18785
ENST00000489024	ENSG00000134313	KIDINS220	0.864828	2.78182	0.470366	0.851562	0.620532	1.29432
ENST00000372201	ENSG00000173846	PLK3	1.43929	2.77834	1.88952	1.06584	1.56704	1.02727
ENST00000522324	ENSG00000188343	FAM92A	2.25441	2.77798	2.39523	0.917262	0.750293	0.761327
ENST00000299633	ENSG00000166503	HDGFL3	0.976322	2.73168	0.891949	0.636985	2.62469	0.282377
ENST00000433932	ENSG00000149485	FADS1	0	2.69255	0	0.212635	0	0
ENST00000560722	ENSG00000100564	PIGH	0.141988	2.68133	0.140496	0.085786	0.166488	0.113327
ENST00000280892	ENSG00000151247	EIF4E	0.178081	2.65323	1.113	0.426263	0.365752	0.219013
ENST00000392481	ENSG00000163918	RFC4	0.410971	2.64292	0.741085	0.420669	0.342313	0.357132
ENST00000555750	ENSG00000211448	DIO2	0.034114	2.64274	1.77784	0.456139	0.389703	1.15256
ENST00000519387	ENSG00000160886	LY6K	0.927557	2.64261	1.10034	0.934889	0.583327	0.916356
ENST00000251630	ENSG00000104213	PDGFRL	4e-06	2.63715	0	0	0	0
ENST00000550345	ENSG00000152556	PFKM	0.799108	2.60716	0.01257	0	3.23741	0
ENST00000395571	ENSG00000165156	ZHX1	1.45785	2.60047	0.851192	0.978762	0.771109	0.735498
ENST00000652509	ENSG00000100714	MTHFD1	2.69627	2.58867	1.1165	1.0683	0.655316	1.24776
ENST00000358129	ENSG00000115641	FHL2	0.478738	2.55741	2.14022	0.85549	1.23888	1.24073
ENST00000588767	ENSG00000013306	SLC25A39	0.523339	2.5572	0.602801	0.34476	0.296706	0.298218
ENST00000599539	ENSG00000105193	RPS16	1.21519	2.55658	2.26531	2.50701	0.594912	0.846778
ENST00000444430	ENSG00000064012	CASP8	0	2.54968	0	0.052604	0.107549	0
ENST00000456325	ENSG00000143569	UBAP2L	0.36055	2.54961	1.10136	0.522529	0.455564	0.628154
ENST00000535131	ENSG00000150991	UBC	0	2.49174	1.89215	0.069345	0	2.33901
ENST00000593437	ENSG00000142227	EMP3	0	2.47389	0.250746	0	0	1.09084
ENST00000651624	ENSG00000124795	DEK	1.04786	2.47089	0.867728	0	0	0
ENST00000648743	ENSG00000168216	LMBRD1	0	2.46834	0	0	0	1.41943
ENST00000533969	ENSG00000110700	RPS13	0.429812	2.45692	0.750512	1.37833	0.786992	1.14856
ENST00000395331	ENSG00000126522	ASL	0	2.44109	0	0	0	1.99687
ENST00000312134	ENSG00000175315	CST6	0.710784	2.43464	1.4544	1.41246	1.2628	0.702558
ENST00000262631	ENSG00000105711	SCN1B	0.96624	2.4147	1.53276	0.735258	1.3432	1.37406
ENST00000356957	ENSG00000153066	TXNDC11	0.029367	2.41357	0.033737	0.017112	0.025702	0.001633
ENST00000366928	ENSG00000143353	LYPLAL1	0.138672	2.40333	1.24051	0.857676	1.55396	0.505265
ENST00000380041	ENSG00000047634	SCML1	0.624961	2.40244	1.10328	0	1.47044	0.960222
ENST00000578237	ENSG00000221926	TRIM16	0	2.3735	0	0	0.071174	0
ENST00000404625	ENSG00000136244	IL6	0.114704	2.36308	0.633947	0.036604	0	0.090637
ENST00000263205	ENSG00000099917	MED15	1.68512	2.34954	0.958803	0.897181	0.922617	1.02247
ENST00000441265	ENSG00000076242	MLH1	0.326438	2.34943	0.18787	0	0	0.260887
ENST00000383801	ENSG00000157020	SEC13	0.129463	2.34801	0.774322	1.19487	0.147659	1.7534
ENST00000366957	ENSG00000143499	SMYD2	0.266431	2.34575	0.350912	0.379562	0.308848	1.20865
ENST00000518483	ENSG00000174371	EXO1	0	2.33738	1.48632	0	0	0
ENST00000649011	ENSG00000168216	LMBRD1	0	2.33488	0	0	0	0
ENST00000295461	ENSG00000163293	NIPAL1	0.539317	2.32444	0.591441	0.300698	0.14282	0.393467
ENST00000264021	ENSG00000118096	IFT46	0.224557	2.31691	0.899079	1.06428	0.994685	0.961437
ENST00000647097	ENSG00000109323	MANBA	0.60629	2.30082	1.36937	2.18614	0.783688	0.651373
ENST00000572392	ENSG00000185359	HGS	1.34256	2.29586	1.52923	0	0.826702	0.83218
ENST00000565627	ENSG00000174442	ZWILCH	0	2.28094	0	0	0.76675	0
ENST00000373740	ENSG00000149636	DSN1	2.20452	2.27342	1.26979	0.475156	0.571105	0.93303
ENST00000428941	ENSG00000101972	STAG2	0.012484	2.27046	0.254602	0.009659	0.017865	1.33739
ENST00000371144	ENSG00000101972	STAG2	0.075902	2.26628	1.75524	0.886833	1.73493	0.442194
ENST00000357540	ENSG00000155256	ZFYVE27	0.031332	2.26591	0.495566	0.016833	0.525273	0.982183
ENST00000584539	ENSG00000118680	MYL12B	0.106647	2.26266	0.535858	0.024758	0.119893	0.156153
ENST00000372352	ENSG00000130713	EXOSC2	0.01754	2.25542	0.030761	0.012086	0.521506	0.219988
ENST00000421809	ENSG00000244405	ETV5	0.734565	2.24607	1.77178	2.06886	0.08992	0.788975
ENST00000254667	ENSG00000132334	PTPRE	1.08051	2.23377	1.69433	0.805832	0.568285	0.811251
ENST00000354911	ENSG00000095787	WAC	0.420376	2.22289	1.74472	2.55397	0.931507	0.281891
ENST00000367906	ENSG00000117152	RGS4	0.204969	2.21104	0.597077	0.1753	0	1.09448
ENST00000520955	ENSG00000188343	FAM92A	0.608167	2.202	2.04233	1.3147	0.790042	0.320135
ENST00000427040	ENSG00000117543	DPH5	0.088051	2.18608	0.07781	0.185774	0.075723	0.031668
ENST00000379279	ENSG00000089063	TMEM230	0.500659	2.1768	0.649738	0.923593	0.730691	1.06405
ENST00000306481	ENSG00000168944	CEP120	0.001546	2.13906	0	0.297042	0.232369	1.07196
ENST00000511368	ENSG00000145536	ADAMTS16	0.858498	2.1325	1.56448	0.795381	0.768181	0.945115
ENST00000613416	ENSG00000176095	IP6K1	0	2.1153	0	0	0	0
ENST00000537440	ENSG00000043514	TRIT1	0	2.1127	1.70761	0	0	1.53869
ENST00000311873	ENSG00000091732	ZC3HC1	0.000861	2.10119	0.000979	0.003008	0.002566	0.036776
ENST00000295065	ENSG00000162959	MEMO1	1.5132	2.08265	1.16042	1.09523	0.857278	0.747776
ENST00000506469	ENSG00000137207	YIPF3	0	2.0685	0.495932	0	0	1.53123
ENST00000301068	ENSG00000167550	RHEBL1	1.00589	2.05427	1.43142	0.777658	1.19644	0.729087
ENST00000570495	ENSG00000184939	ZFP90	1.43043	2.05211	1.44842	1.13287	0.765658	0.164724
ENST00000227451	ENSG00000110042	DTX4	0.646238	2.04797	1.5087	0.483625	1.55618	0.751934
ENST00000341065	ENSG00000187634	SAMD11	0.09608	2.04251	1.47104	1.04229	1.02006	0
ENST00000395761	ENSG00000163739	CXCL1	0.172159	2.03281	0.654063	0.21084	0.065128	0.154511
ENST00000594908	ENSG00000105223	PLD3	0.643517	2.03269	0.947292	0.457259	0.738292	1.12925
ENST00000391418	ENSG00000212724	KRTAP2-3	0.784719	2.02706	1.60164	0.534305	0.35602	0.134375
ENST00000556143	ENSG00000165861	ZFYVE1	0.384247	2.0168	0.218429	0.116776	0.171871	0.192095
ENST00000368273	ENSG00000160783	PMF1	0.457425	2.00755	0.433922	0.111162	0.640621	1.42472
ENST00000222250	ENSG00000105643	ARRDC2	0.163631	2.00099	0.167289	0.185494	0.22356	0.260283
ENST00000611140	ENSG00000077684	JADE1	0.005445	1.99435	0.008266	0.00924	0.005198	0.011894
ENST00000257430	ENSG00000134982	APC	0.226396	1.98858	0.089592	0.091677	0.11091	0.092354
ENST00000295290	ENSG00000163138	PACRGL	0	1.9833	0	0	0	0
ENST00000220959	ENSG00000104517	UBR5	0.014038	1.95461	0.094983	0.049609	0.175126	0.22232
ENST00000402563	ENSG00000177150	FAM210A	1.17193	1.93713	1.73753	1.21731	0.006134	0.310425
ENST00000584450	ENSG00000141736	ERBB2	0.904871	1.93576	0.671676	0.926655	0.953323	0.512677
ENST00000651023	ENSG00000099204	ABLIM1	0.163285	1.90508	0.740311	0.770939	0.311547	1.15477
ENST00000327351	ENSG00000159884	CCDC107	0.382127	1.8809	0	0.393117	0	0.605015
ENST00000573876	ENSG00000182446	NPLOC4	0.831089	1.86319	1.10609	0.71343	1.02871	0.831144
ENST00000389204	ENSG00000198363	ASPH	0.156926	1.85575	0.160835	0.309229	0.132773	0.201056
ENST00000579225	ENSG00000266028	SRGAP2	0.854246	1.84537	0.516148	0.822123	0	0
ENST00000269260	ENSG00000141480	ARRB2	0.53545	1.84117	0.258406	1.10154	0.378811	0.414257
ENST00000273223	ENSG00000144713	RPL32	0.837025	1.84088	1.44458	1.66781	0.61081	0.560206
ENST00000338947	ENSG00000133107	TRPC4	2.23967	1.84069	1.64117	0	1.27413	0.898835
ENST00000522420	ENSG00000156787	TBC1D31	0	1.83421	0	0	0.559943	0.054165
ENST00000453712	ENSG00000138698	RAP1GDS1	0.170143	1.82423	0.163648	0.219188	0.251824	0.159071
ENST00000530649	ENSG00000149591	TAGLN	0	1.82346	0	0	0	0
ENST00000564367	ENSG00000086666	ZFAND6	0	1.81723	0	0	0	0
ENST00000481390	ENSG00000122861	PLAU	0.850619	1.81561	1.11032	0.328749	0.027446	1.47526
ENST00000510894	ENSG00000109220	CHIC2	0.721558	1.81142	0.518102	0.353714	0.10042	0.914285
ENST00000276461	ENSG00000147475	ERLIN2	0.060513	1.80502	0.027539	0.071393	0.117009	0.165716
ENST00000392952	ENSG00000099204	ABLIM1	0.806944	1.79049	0.266643	0.077935	0	0.19557
ENST00000601291	ENSG00000126456	IRF3	0.628139	1.79043	0.70708	0.742455	0.718623	0.390488
ENST00000426253	ENSG00000196290	NIF3L1	0	1.77376	0.741248	0.70446	1.16471	0.808243
ENST00000647936	ENSG00000184500	PROS1	0	1.77215	0	0.327188	0	0
ENST00000606983	ENSG00000064666	CNN2	0.903186	1.76975	1.52525	0.646903	0.320057	1.4556
ENST00000557338	ENSG00000033170	FUT8	0.007528	1.76509	0.002752	0.00362	0	1.83104
ENST00000320583	ENSG00000197343	ZNF655	0.577026	1.76489	0.314106	0.89123	0.567736	0.16792
ENST00000409673	ENSG00000144306	SCRN3	0	1.75036	0.819553	0.526997	0.401464	0.076993
ENST00000394586	ENSG00000033170	FUT8	0.464972	1.74596	0.729564	0	0	0
ENST00000517903	ENSG00000198363	ASPH	0	1.74004	0	0	0	0
ENST00000326902	ENSG00000180613	GSX2	0.470537	1.73837	0.679625	0.415729	0.43032	0.809453
ENST00000369825	ENSG00000173915	ATP5MD	0.352277	1.73165	0.752849	0.673951	1.3516	0.482069
ENST00000601098	ENSG00000062822	POLD1	0.754075	1.72345	1.13378	0.046086	1.24635	1.32154
ENST00000398080	ENSG00000047634	SCML1	0.724344	1.72175	1.49605	1.16935	0.784946	0.644878
ENST00000406869	ENSG00000002822	MAD1L1	0.192684	1.71511	0.375407	0.247108	0.264539	0.51086
ENST00000451406	ENSG00000139974	SLC38A6	0	1.67769	0.646392	0	1.3125	0.137478
ENST00000452138	ENSG00000100225	FBXO7	0.290114	1.67069	0.359512	0.460793	0.536536	0.683716
ENST00000613923	ENSG00000062822	POLD1	1.01213	1.6644	0.429321	0.328828	0.038134	0.353671
ENST00000429378	ENSG00000007392	LUC7L	0.849522	1.64995	0.865024	0.996481	0.664799	0.690782
ENST00000401088	ENSG00000055070	SZRD1	0.129262	1.64879	0.590823	1.36716	0.370134	0.309262
ENST00000594784	ENSG00000141971	MVB12A	0.667236	1.63829	1.17056	0.403854	0.730503	0.403388
ENST00000409637	ENSG00000144366	GULP1	0.891204	1.63617	0.689994	0.560066	0.115557	0.117932
ENST00000447382	ENSG00000196083	IL1RAP	1.35539	1.63527	1.02972	0.680282	0.777152	0.501816
ENST00000565263	ENSG00000167264	DUS2	1.12172	1.63322	0.394221	0.300587	0.26775	0.45147
ENST00000372103	ENSG00000101888	NXT2	0.408579	1.62699	0.938231	1.0932	0.004836	0.979841
ENST00000341744	ENSG00000124225	PMEPA1	0.90024	1.61314	0.771958	0.521964	0.796563	0.589223
ENST00000630839	ENSG00000140740	UQCRC2	1.00905	1.60644	1.23729	1.10846	0.016198	1.17101
ENST00000415920	ENSG00000214078	CPNE1	0.624146	1.59481	0.375922	0.204263	0.190563	0.349648
ENST00000543392	ENSG00000185164	NOMO2	1.20851	1.59413	0	0	1.23582	0
ENST00000397912	ENSG00000128563	PRKRIP1	0.207602	1.59107	0.790012	0.55888	0.549458	1.07204
ENST00000630827	ENSG00000152795	HNRNPDL	0.443061	1.57734	1.34705	0	2.41591	0
ENST00000554101	ENSG00000100612	DHRS7	0.535609	1.56904	0.316737	0.137756	0.336917	0.608939
ENST00000435506	ENSG00000141698	NT5C3B	0.325124	1.56643	0.927154	0.855966	0.861049	0.748904
ENST00000388768	ENSG00000204130	RUFY2	0.11736	1.56299	1.05888	0.047154	1.25257	0.943436
ENST00000652365	ENSG00000166923	GREM1	0.470764	1.5601	1.02541	0.525268	0.241201	0.276919
ENST00000491845	ENSG00000163689	C3orf67	0.007788	1.54964	0	0.041633	0.318335	1.27756
ENST00000651865	ENSG00000140694	PARN	0.003474	1.54843	0.762944	1.04941	0.445895	9.3e-05
ENST00000377071	ENSG00000089094	KDM2B	0.453637	1.53922	0.257626	0.263183	0.074028	0.325002
ENST00000356124	ENSG00000139531	SUOX	0.193952	1.5388	0.14778	0.113204	0.191936	0.144484
ENST00000543784	ENSG00000185480	PARPBP	0.995697	1.5382	0.52841	0.840027	0.695748	0.145636
ENST00000610426	ENSG00000164346	NSA2	0.513835	1.53169	0.615774	0.356848	1.17899	0.653928
ENST00000512044	ENSG00000164741	DLC1	0.555755	1.52714	1.3086	0.530434	0.924204	0.775805
ENST00000435760	ENSG00000197548	ATG7	1.09147	1.51496	1.14198	0.902862	0.020752	1.19122
ENST00000237305	ENSG00000118515	SGK1	0.942145	1.50231	0.704363	0.753865	1.0435	0.295483
ENST00000376029	ENSG00000151287	TEX30	0.243421	1.49847	0.712475	0.62478	1.08601	0.484933
ENST00000414835	ENSG00000133835	HSD17B4	0	1.49261	0.242479	0.434711	0.061875	0.632651
ENST00000564258	ENSG00000166140	ZFYVE19	0	1.48739	0.610395	0	0.24356	0
ENST00000379283	ENSG00000089063	TMEM230	0.395	1.48594	0.596513	0.426841	0.424094	0.49631
ENST00000352879	ENSG00000142330	CAPN10	0.127016	1.48386	0.156596	0	0.312627	0.427059
ENST00000329608	ENSG00000184371	CSF1	0.934985	1.47477	0.567733	0.213864	0.359966	0.563257
ENST00000521180	ENSG00000008513	ST3GAL1	0.116274	1.46738	0.051278	0.049748	0.083743	0.06124
ENST00000429029	ENSG00000105993	DNAJB6	0.063635	1.46393	0.511888	0.679175	0.313988	0.376118
ENST00000445684	ENSG00000033867	SLC4A7	0.111902	1.46016	0.267126	0.302445	0.120171	1.2983
ENST00000442711	ENSG00000122641	INHBA	0.635976	1.45792	0.480805	0.519714	0.249728	0.26258
ENST00000393484	ENSG00000135269	TES	0.38796	1.45602	0.302784	0.246636	1.00114	0.353649
ENST00000203001	ENSG00000089195	TRMT6	0.186254	1.45266	0.017145	0.032348	0.026538	0.623758
ENST00000520967	ENSG00000171604	CXXC5	0.102753	1.44936	0.051642	0.082955	0.097664	0.064324
ENST00000575744	ENSG00000133393	FOPNL	0.029695	1.44832	0.413752	0.71476	0.940859	0.106458
ENST00000450808	ENSG00000162368	CMPK1	0.26126	1.44575	0.56456	1.05334	0.392312	0.388332
ENST00000641048	ENSG00000107262	BAG1	3.5e-05	1.44542	3.5e-05	4.1e-05	2.5e-05	2.2e-05
ENST00000345249	ENSG00000138032	PPM1B	0	1.44531	0	0	0.466695	1.01148
ENST00000492843	ENSG00000106617	PRKAG2	0.967644	1.44304	1.17982	0.928388	0.685111	0.632633
ENST00000527043	ENSG00000173227	SYT12	0.189315	1.43727	1.13785	0.365032	0.275861	0.247363
ENST00000510794	ENSG00000090316	MAEA	0.706399	1.43712	1.1546	0.008141	0	0.002814
ENST00000243583	ENSG00000123815	COQ8B	0.015919	1.43147	0.015032	0.078871	0.048701	1.10194
ENST00000584322	ENSG00000136492	BRIP1	0.580396	1.42961	1.15139	0.632481	0.505029	0.399663
ENST00000558190	ENSG00000066427	ATXN3	0.986875	1.42955	0.974762	0.11865	0.109735	0.080389
ENST00000393335	ENSG00000166451	CENPN	0.036143	1.42478	0.895413	0.023478	0.242224	0
ENST00000461271	ENSG00000108384	RAD51C	0	1.42341	0.536237	0.571987	0.038411	1.28259
ENST00000650006	ENSG00000006530	AGK	1.74333	1.4224	1.35336	0.784849	0.607872	0.343755
ENST00000393765	ENSG00000121578	B4GALT4	0.663123	1.42181	1.16869	0.853475	0.806269	0.56757
ENST00000555155	ENSG00000166965	RCCD1	0.310842	1.40885	0.346795	0.237602	0.190094	0.161301
ENST00000443297	ENSG00000115091	ACTR3	0.864942	1.40029	0.033216	0.044897	0.216333	0.110135
ENST00000295958	ENSG00000163683	SMIM14	1.62382	1.38709	1.09577	1.3067	0.115897	0.26385
ENST00000489843	ENSG00000168374	ARF4	0.016068	1.38062	0.530036	0.017599	0.066302	0.002309
ENST00000532306	ENSG00000159063	ALG8	0.106178	1.38031	0	0	0	0
ENST00000652277	ENSG00000077150	NFKB2	1.20502	1.37194	0.500162	0.42221	0.393145	0.468939
ENST00000450331	ENSG00000032444	PNPLA6	0.079876	1.36626	0.854849	1.42842	0.085156	0.104695
ENST00000433924	ENSG00000144136	SLC20A1	1.33305	1.36381	1.27382	0.481181	0.644376	0.715575
ENST00000320665	ENSG00000171097	KYAT1	0	1.35975	1.18556	0	0.710805	1.22818
ENST00000355684	ENSG00000197857	ZNF44	0.053686	1.35282	0.983088	1.18555	0.080047	0.873874
ENST00000482582	ENSG00000183763	TRAIP	0.787116	1.34911	0.7439	0	0.874829	0.955993
ENST00000649012	ENSG00000108671	PSMD11	1.09664	1.34676	1.10106	1.07743	0.174969	0.500627
ENST00000317551	ENSG00000139624	CERS5	0.568416	1.34481	0.314041	0.569665	0.492232	0.138498
ENST00000359524	ENSG00000124813	RUNX2	0.04755	1.34418	0.031719	0.031486	0.103918	0
ENST00000443938	ENSG00000124357	NAGK	0.348843	1.32679	0	0	0	0.292519
ENST00000646241	ENSG00000064601	CTSA	0.184501	1.325	0.427717	0.735529	0.4032	0.482552
ENST00000618828	ENSG00000204262	COL5A2	0.137593	1.31175	0.292397	0.020886	0.243265	0.356747
ENST00000464664	ENSG00000274559	CU639417.1	0.204226	1.30913	0.948137	0.278524	0.311529	0.372839
ENST00000264274	ENSG00000064012	CASP8	2.5e-05	1.30836	0.039671	8.7e-05	0.024749	0.002861
ENST00000651643	ENSG00000177150	FAM210A	0.665792	1.30698	0.929705	0.852375	0.000214	0.164534
ENST00000562664	ENSG00000149923	PPP4C	0.254582	1.30575	0.847564	0.469284	0.772374	0.508109
ENST00000490776	ENSG00000122642	FKBP9	0.071141	1.30558	0.086128	0.061124	0.029625	0.968632
ENST00000645606	ENSG00000284934	DIABLO	0.285025	1.29564	0.124909	0.145106	0	0
ENST00000423241	ENSG00000003402	CFLAR	0.680049	1.28061	0.624517	0.731	0.446513	0.464925
ENST00000242208	ENSG00000122641	INHBA	0.789447	1.2724	0.731354	0.247299	0.259745	0.240557
ENST00000575841	ENSG00000175866	BAIAP2	1.00342	1.27088	0.604469	0.608914	0.43417	0.48656
ENST00000511912	ENSG00000171503	ETFDH	0.534511	1.27059	0.221551	0.354179	0.877901	0.097908
ENST00000272937	ENSG00000144485	HES6	0.55003	1.26724	0.564155	0.271129	0.466608	0.763208
ENST00000651634	ENSG00000140694	PARN	0.53524	1.25926	0	0	0	0
ENST00000444121	ENSG00000066651	TRMT11	0.721252	1.25404	1.17838	0.709376	0.95721	0.000187
ENST00000356527	ENSG00000143420	ENSA	0.625974	1.24906	1.01662	0	0.898427	0.767028
ENST00000398958	ENSG00000180198	RCC1	0	1.24698	0	0.007048	0.0052	0.003046
ENST00000571518	ENSG00000185359	HGS	0.474163	1.24679	0.931209	1.17862	0.357436	0.23807
ENST00000431353	ENSG00000152443	ZNF776	0.026857	1.24626	0.153152	0.018232	0.013443	0.038491
ENST00000517312	ENSG00000134824	FADS2	0.40202	1.24221	1.02828	0.751839	0.345218	0.739084
ENST00000380874	ENSG00000054598	FOXC1	0.831815	1.23843	0.455769	0.440548	0.72138	0.439396
ENST00000296792	ENSG00000164338	UTP15	0.012585	1.23626	0.025472	0.066928	0.099317	0.039019
ENST00000257963	ENSG00000135503	ACVR1B	0.247971	1.23083	0.010877	0.103072	0.09005	0.224169
ENST00000645391	ENSG00000130429	ARPC1B	0.221303	1.22435	0.828132	1.10504	0.36646	0.333748
ENST00000395711	ENSG00000198301	SDAD1	0	1.20938	0	0	0	0
ENST00000409386	ENSG00000130559	CAMSAP1	0	1.20934	0	0	7.3e-05	0
ENST00000623893	ENSG00000276600	RAB7B	0.708459	1.20671	1.05931	0.34111	0.50638	0.474399
ENST00000565880	ENSG00000070761	CFAP20	0	1.20551	0.997888	0	0	0
ENST00000313663	ENSG00000168014	C2CD3	0	1.20109	1.15828	1.41095	0	0
ENST00000273598	ENSG00000145029	NICN1	0.015515	1.19962	0.07113	0.000426	0.000191	9.6e-05
ENST00000519831	ENSG00000137547	MRPL15	0.181814	1.19907	0.069201	0.083579	0.063747	0.060484
ENST00000421743	ENSG00000117152	RGS4	0	1.19612	0	0	0	0
ENST00000498139	ENSG00000117407	ARTN	0.03929	1.19266	0.033294	0.039864	0	0.044511
ENST00000584197	ENSG00000141552	ANAPC11	0	1.19074	0.805758	0.699858	0	0
ENST00000629426	ENSG00000119723	COQ6	0.290547	1.19071	0.184177	0.137784	0.184778	0.100683
ENST00000648726	ENSG00000169515	CCDC8	1.10746	1.19023	1.10061	0.90512	0.004144	0.00403
ENST00000537257	ENSG00000185480	PARPBP	0.634	1.18292	1.05327	0.962899	0.348475	0.446934
ENST00000433529	ENSG00000116001	TIA1	0.194383	1.17946	0.443237	0.597634	0.284202	0.205253
ENST00000399275	ENSG00000120693	SMAD9	1.24383	1.1768	0.633405	0.35162	0.262962	0.326142
ENST00000580824	ENSG00000094804	CDC6	0.583897	1.17445	0.630324	0.091575	0.585643	0.308335
ENST00000547715	ENSG00000127329	PTPRB	0.336568	1.17229	0.920998	0.563039	0.340161	0.33089
ENST00000342071	ENSG00000055950	MRPL43	0.299402	1.16505	0.625966	1.08303	0.439763	0
ENST00000004531	ENSG00000003989	SLC7A2	0	1.16282	0.310491	0	0	0
ENST00000533011	ENSG00000254505	CHMP4A	0.055047	1.16109	1.08038	0.091197	0.219685	0.113328
ENST00000593764	ENSG00000160410	SHKBP1	0	1.15997	0	0	0	0
ENST00000642355	ENSG00000121957	GPSM2	0	1.15912	0	0	0	0
ENST00000647465	ENSG00000198860	TSEN15	0.020259	1.15508	0.417311	1.04204	0.705799	0.053006
ENST00000570184	ENSG00000172775	FAM192A	0	1.15361	0	0	0	0
ENST00000652513	ENSG00000142166	IFNAR1	0.845385	1.1517	0.328882	0.089122	0.199539	0.04533
ENST00000592701	ENSG00000108883	EFTUD2	0.353907	1.15006	0.528243	0.562418	0.33522	0.411958
ENST00000337990	ENSG00000126970	ZC4H2	0.000822	1.14505	0.005699	0.027644	0	0.00296
ENST00000338662	ENSG00000135390	ATP5MC2	0.764586	1.14229	0.946412	0	0	0.390792
ENST00000269095	ENSG00000108852	MPP2	0.070747	1.13903	0.936747	0.038208	0.026149	0.05069
ENST00000465373	ENSG00000175110	MRPS22	0.040396	1.13877	0	0.006042	0.032966	0.039367
ENST00000422521	ENSG00000170634	ACYP2	1e-06	1.13423	0	0	0	0
ENST00000444703	ENSG00000130810	PPAN	0.158466	1.13351	0.771091	0.564513	0.864981	0.357543
ENST00000577543	ENSG00000177426	TGIF1	0.610167	1.12862	0.649595	0.387955	0.323228	0.635661
ENST00000353088	ENSG00000088833	NSFL1C	0.54299	1.12847	0	0	0	0.953617
ENST00000358704	ENSG00000179456	ZBTB18	0.01053	1.12748	0.002217	0.005273	0.013027	0.006841
ENST00000257290	ENSG00000134853	PDGFRA	0.761976	1.1263	0.753816	0.309397	0.359775	0.301584
ENST00000216862	ENSG00000019186	CYP24A1	0.277899	1.1204	0.571815	0.296457	0.051692	0.248258
ENST00000299855	ENSG00000149968	MMP3	0.137247	1.11906	1.07226	0.940567	0.614499	0.119353
ENST00000433083	ENSG00000111752	PHC1	0.065574	1.10312	0.012739	0.018763	0.002701	0.039642
ENST00000155926	ENSG00000071575	TRIB2	0.63581	1.10291	0.702464	0.458296	0.525306	0.602866
ENST00000395884	ENSG00000155090	KLF10	0.846846	1.0889	0.702604	0.017832	0.020814	0.44586
ENST00000603223	ENSG00000145990	GFOD1	0.004534	1.08866	0.902974	0.644753	1.08781	0.00318
ENST00000642402	ENSG00000088836	SLC4A11	0.163443	1.08447	0.032777	0.013877	0.174579	0.083502
ENST00000474423	ENSG00000163938	GNL3	0.006299	1.08359	0.620962	0.022076	0.685287	0.313916
ENST00000540933	ENSG00000089597	GANAB	0.088959	1.08339	0.996427	0.743418	0.403552	0.008501
ENST00000545612	ENSG00000111325	OGFOD2	0.363695	1.07245	0.503578	0.795929	0.173382	0.305416
ENST00000542838	ENSG00000013573	DDX11	0.085847	1.07161	0.229631	0.101351	0.100842	0.360006
ENST00000514004	ENSG00000001084	GCLC	0.864508	1.05759	0.18986	0.301851	0.551293	0.078948
ENST00000621366	ENSG00000088970	KIZ	0.001647	1.05711	0.971103	4.1e-05	0.27595	0.892827
ENST00000541587	ENSG00000092036	HAUS4	0.145183	1.05262	0.880126	0.043985	0.209788	0.113136
ENST00000526686	ENSG00000109971	HSPA8	0.211588	1.05064	0.556382	0.627482	0.320176	0.208807
ENST00000423037	ENSG00000140830	TXNL4B	0.021294	1.04993	0.001724	0.003639	0.003991	0.003486
ENST00000534947	ENSG00000111652	COPS7A	0.227261	1.0497	0.070286	0.056616	0.081017	0.084254
ENST00000421914	ENSG00000162736	NCSTN	0.608496	1.04213	0.598122	0.139376	0.669409	0.323271
ENST00000556742	ENSG00000119650	IFT43	0.533174	1.04192	0.913948	0.626753	0.775693	0.070851
ENST00000603928	ENSG00000235106	BRD3OS	0.198248	1.04088	0.365823	0.438241	0.352354	0.673036
ENST00000371681	ENSG00000165338	HECTD2	0.616431	1.03689	0.755809	0.901943	0.109493	0.176763
ENST00000380180	ENSG00000163110	PDLIM5	0.149403	1.03371	0.232117	0.137601	0.044129	0.418194
ENST00000456958	ENSG00000229833	PET100	0.307436	1.03009	0.954265	0.788762	0.793904	0.136412
ENST00000395980	ENSG00000176697	BDNF	0.703183	1.02939	0.808848	0.65593	0.397691	0.320854
ENST00000357332	ENSG00000198356	ASNA1	0.515007	1.02871	0.082438	1.09801	0.068264	0.019966
ENST00000571874	ENSG00000141552	ANAPC11	0.002586	1.02779	0.004003	0.006768	0.020627	0.007377
ENST00000394070	ENSG00000124356	STAMBP	0.258491	1.02288	0.583029	0.383223	0.43508	0.478928
ENST00000533172	ENSG00000167283	ATP5MG	0	1.01808	0.765221	0.83419	0.422422	0.259828
ENST00000517392	ENSG00000183137	CEP57L1	0.102529	1.01486	0.077297	0	0.125098	0.119846
ENST00000376521	ENSG00000102100	SLC35A2	0.686347	1.00902	0.170272	0.286765	0.189487	0.377826
ENST00000303553	ENSG00000170906	NDUFA3	0.53795	1.00805	0.847318	0.784619	0.509646	0.220018
ENST00000531183	ENSG00000165895	ARHGAP42	0.01716	1.00796	0.035679	0.004936	0.004267	0.398502
ENST00000324306	ENSG00000106261	ZKSCAN1	0.261442	1.005	0.189046	0.052941	0.186391	0.220886
ENST00000504860	ENSG00000121211	MND1	0.561444	0.99883	0.391408	0.087042	0.097132	0.606606
ENST00000627638	ENSG00000078098	FAP	0.426913	0.998617	0.365955	0.086774	0.459954	0.531041
ENST00000620645	ENSG00000188343	FAM92A	0.28252	0.998153	0.485898	0.028626	0.069975	0.169173
ENST00000566069	ENSG00000083093	PALB2	0.65417	0.997283	0.362555	0.308477	0.328422	0.475198
ENST00000409592	ENSG00000135905	DOCK10	0.04411	0.994959	0.505643	0.075668	0.325457	0
ENST00000392209	ENSG00000163249	CCNYL1	0	0.992642	0	0	0	1.04812
ENST00000552955	ENSG00000127337	YEATS4	0.010732	0.992626	0.001584	0.036717	0.053493	0.437671
ENST00000222644	ENSG00000105926	MPP6	1.11119	0.992177	0.943571	0.403485	0	0.890544
ENST00000372651	ENSG00000066136	NFYC	0	0.989531	0.417752	0.466195	0.322758	0.027081
ENST00000372072	ENSG00000157600	TMEM164	0.224479	0.986092	0.132526	0.07593	0.074534	0.131839
ENST00000248121	ENSG00000127561	SYNGR3	0.274901	0.985244	0.399495	0.361482	0.425739	0.528858
ENST00000574841	ENSG00000170291	ELP5	0.054245	0.982772	0.485567	0.358711	0.737943	0.309367
ENST00000306058	ENSG00000171456	ASXL1	0.718302	0.973141	0.289351	0.228083	0.157192	0.273173
ENST00000517570	ENSG00000168502	MTCL1	0.398085	0.967597	0.270214	0.005307	0.00639	0.154917
ENST00000369256	ENSG00000099204	ABLIM1	0.061074	0.966153	0.047577	0.050142	0.019171	0.030427
ENST00000409807	ENSG00000115641	FHL2	0.386138	0.964887	0.405963	0.137464	0.216153	0.066255
ENST00000380092	ENSG00000134461	ANKRD16	0.654512	0.964715	0.216949	0.253426	0.301709	0.567667
ENST00000409837	ENSG00000138382	METTL5	0.081509	0.960566	0.216857	0.092926	0	0.093598
ENST00000622969	ENSG00000276600	RAB7B	0.239235	0.960257	0.666463	0.417895	0.399568	0.121267
ENST00000495692	ENSG00000125779	PANK2	0.499413	0.959263	0	0	1.06061	0
ENST00000413307	ENSG00000118200	CAMSAP2	0.71473	0.958949	0.208835	0.18308	0.148866	0.275071
ENST00000420488	ENSG00000171552	BCL2L1	0.121461	0.958385	0.075813	0.052591	4.7e-05	0
ENST00000506889	ENSG00000131446	MGAT1	0.000761	0.957614	0.000213	0.000227	0.000434	0.000208
ENST00000439741	ENSG00000014914	MTMR11	0.520839	0.955992	0.768422	0.434838	0.463319	0.5538
ENST00000566426	ENSG00000179889	PDXDC1	0.130862	0.953343	0.808304	0.723548	0.21653	0.289458
ENST00000396032	ENSG00000101126	ADNP	0.67208	0.942192	0.049169	0.034156	0.60205	0.023551
ENST00000454792	ENSG00000170473	PYM1	0.517018	0.94083	0.395173	0.296058	0.019711	0.279763
ENST00000545748	ENSG00000123358	NR4A1	0	0.932504	0	0	0	0.138711
ENST00000374910	ENSG00000186787	SPIN2B	0.354603	0.922074	0.256891	0.153603	0.230219	0.523422
ENST00000359428	ENSG00000126883	NUP214	0.381187	0.918908	0.121864	0.84784	0.051891	0.140792
ENST00000597945	ENSG00000167625	ZNF526	0.410095	0.917529	0.7444	0.627468	0.333272	0.230242
ENST00000588571	ENSG00000197563	PIGN	0	0.916149	0.19271	0.197159	0	0.708788
ENST00000370278	ENSG00000221867	MAGEA3	0.390194	0.911822	0.471172	0.254117	0.515649	0.382969
ENST00000523127	ENSG00000133872	SARAF	0	0.910226	0.820192	0	0	0
ENST00000403579	ENSG00000096717	SIRT1	0.006173	0.90899	0.060478	0.008994	0.002852	0.13467
ENST00000611852	ENSG00000024862	CCDC28A	0.000599	0.908546	0.000578	0.00018	0.002057	0.000774
ENST00000274764	ENSG00000146047	HIST1H2BA	0	0.902947	0.665945	0.116734	0.076192	0.185695
ENST00000333137	ENSG00000183963	SMTN	0.331948	0.898456	0.597002	0.149568	0.216148	0.387961
ENST00000278559	ENSG00000149260	CAPN5	0.116752	0.898444	0.375681	0.010723	0.222633	0.055271
ENST00000537904	ENSG00000013306	SLC25A39	0.598459	0.893297	0.748969	0.3097	0.620458	0.245624
ENST00000650645	ENSG00000119714	GPR68	0.21077	0.8911	0.204627	0.134957	0.500105	0.221427
ENST00000530811	ENSG00000110060	PUS3	0.001368	0.889099	0.239484	0.001083	0.034757	0.000806
ENST00000635751	ENSG00000182372	CLN8	0.003829	0.886167	1.6e-05	0.070655	0	0
ENST00000432651	ENSG00000119383	PTPA	0.138606	0.882937	0.538931	0.285333	0.386918	0.35037
ENST00000254940	ENSG00000132603	NIP7	0.004355	0.881888	0.000641	0.011072	0.038327	0.019616
ENST00000453383	ENSG00000105993	DNAJB6	0.368126	0.881084	0.537087	0.403211	0.072698	0.051584
ENST00000529886	ENSG00000134910	STT3A	0.409005	0.879816	0.267892	0.58581	0.053732	0.017155
ENST00000450574	ENSG00000006576	PHTF2	0.482239	0.877838	0.662333	0.303105	0.181166	0.315957
ENST00000529338	ENSG00000050165	DKK3	0.428243	0.876504	0.809636	0	0	0.711204
ENST00000617192	ENSG00000070495	JMJD6	0	0.87372	0.280733	0.207826	0.146525	0.32024
ENST00000360423	ENSG00000213648	SULT1A4	0.119181	0.873224	0	0.035895	0.10666	0
ENST00000357219	ENSG00000172738	TMEM217	0.32648	0.868314	0.233704	0.184837	0.395648	0.141267
ENST00000358597	ENSG00000149187	CELF1	0.211376	0.862903	0.24459	0.161791	0.544268	0.209333
ENST00000539281	ENSG00000148834	GSTO1	0.197795	0.862469	0.749516	0	0.601798	0
ENST00000524863	ENSG00000134802	SLC43A3	0	0.862458	0	0	0.026019	0.984574
ENST00000414861	ENSG00000080345	RIF1	0	0.860365	0.785788	0.327281	0	0.747869
ENST00000399654	ENSG00000002822	MAD1L1	0.424939	0.854189	0.358843	0.25002	0.393742	0.453594
ENST00000395138	ENSG00000261052	SULT1A3	0.077826	0.85401	0.066992	0.105646	0.012938	0.007528
ENST00000554002	ENSG00000020426	MNAT1	0.535642	0.853033	0.648355	0.424113	0.374872	0.392927
ENST00000521569	ENSG00000113140	SPARC	0	0.849317	0	0	0	0
ENST00000533464	ENSG00000070047	PHRF1	0	0.848547	0.790072	0	0	0
ENST00000369044	ENSG00000130348	QRSL1	0.16004	0.846491	0.806438	0.932238	0.264008	0.270791
ENST00000369870	ENSG00000162650	ATXN7L2	0.389485	0.845864	0.523504	0.377491	0.516218	0.336902
ENST00000327087	ENSG00000047617	ANO2	0	0.841176	0	0	0	0
ENST00000517957	ENSG00000113721	PDGFRB	0.813671	0.83885	0.752149	0.185873	0.17469	0.253001
ENST00000412414	ENSG00000118263	KLF7	0.000321	0.834798	0.73501	0	0.458063	0
ENST00000548068	ENSG00000111540	RAB5B	0.274383	0.827364	0.424137	0.351793	0.522546	0.152478
ENST00000593714	ENSG00000011422	PLAUR	0.171389	0.823635	0.752022	0.393858	0.1347	0.136942
ENST00000638167	ENSG00000197563	PIGN	0.016149	0.820321	0.009331	0.003879	0.000568	0.000778
ENST00000330651	ENSG00000185386	MAPK11	0.510849	0.813335	0.756467	0.615394	0.018842	0.53114
ENST00000600022	ENSG00000126456	IRF3	0	0.811001	0	0	0	0.463667
ENST00000350494	ENSG00000134759	ELP2	0.130732	0.808863	0.230311	0.248772	0	0.183765
ENST00000393979	ENSG00000239306	RBM14	0	0.808741	0.551727	0.135314	0.257588	0.744259
ENST00000529191	ENSG00000167996	FTH1	0.035431	0.807352	0.010513	0	0	0
ENST00000260843	ENSG00000138271	GPR87	0.319071	0.806266	0.252099	0.301491	0.468072	0.309366
ENST00000370610	ENSG00000155256	ZFYVE27	0.574803	0.805621	0.571336	0.366506	0	0.614544
ENST00000425237	ENSG00000119408	NEK6	0.387675	0.804783	0.463846	0.511867	0.152849	0.251065
ENST00000520682	ENSG00000104660	LEPROTL1	0.036729	0.803725	0.009172	0	0	0.217252
ENST00000545318	ENSG00000082805	ERC1	0.113434	0.79537	0.487445	1.00734	0.023739	0.190839
ENST00000403000	ENSG00000187954	CYHR1	0.002778	0.794622	0.70553	0.055682	0.522277	0.295564
ENST00000400911	ENSG00000139190	VAMP1	0.000256	0.79141	0.003512	0.231787	0	2.9e-05
ENST00000649817	ENSG00000083168	KAT6A	0	0.788966	0	0.007478	0	0
ENST00000407270	ENSG00000057935	MTA3	0.524103	0.788488	0.093131	0.097443	0.280791	0.110219
ENST00000405342	ENSG00000122643	NT5C3A	0.222593	0.788109	0.625402	0.266437	0.461943	0.516287
ENST00000481941	ENSG00000174953	DHX36	0.002442	0.787053	0.002828	0.003135	0	0.007656
ENST00000548467	ENSG00000156273	BACH1	0.250417	0.785593	0.211798	0.276277	0.411075	0.203103
ENST00000275607	ENSG00000129103	SUMF2	0.333276	0.784797	0.195609	0.168708	0.27249	0.266128
ENST00000398250	ENSG00000203805	PLPP4	0.644191	0.783856	0.749911	0.025191	0.536116	0.403015
ENST00000442524	ENSG00000077044	DGKD	0.619476	0.781811	0.381659	0.106352	0.061365	0.242209
ENST00000570981	ENSG00000205629	LCMT1	0.258331	0.780529	0.566219	0.352805	0.41272	0.478666
ENST00000530743	ENSG00000094841	UPRT	0.179927	0.775707	0.29183	0.169986	0.271773	0.184579
ENST00000565262	ENSG00000129636	ITFG1	0.431591	0.77562	0.50184	0.478877	0.146625	0.334646
ENST00000357558	ENSG00000148337	CIZ1	0.079478	0.771407	0.102932	0.272582	0.043251	0.287965
ENST00000370165	ENSG00000162688	AGL	0	0.770871	0	0	0	0
ENST00000472795	ENSG00000000460	C1orf112	0.170242	0.770811	0.456094	0.4217	0.226047	0.18181
ENST00000413338	ENSG00000158560	DYNC1I1	0.756644	0.767559	0.520918	0.378704	0.344721	0.011476
ENST00000594295	ENSG00000197608	ZNF841	0.16448	0.765083	0.140363	0.184268	0.17447	0.245576
ENST00000639716	ENSG00000156113	KCNMA1	0.0246	0.76166	0.015091	0	0.002212	0.013534
ENST00000405331	ENSG00000071575	TRIB2	0.110191	0.761234	0.323266	0.147813	0.143516	0.073466
ENST00000526682	ENSG00000135362	PRR5L	0.294763	0.761064	0.163888	0.159315	0.536932	0.216572
ENST00000585043	ENSG00000171475	WIPF2	0.007088	0.760147	0.041608	0.044624	0.005353	0.534369
ENST00000225729	ENSG00000108591	DRG2	0.990217	0.753499	0.660554	0.322375	0.379775	0.265765
ENST00000451445	ENSG00000131373	HACL1	0.441356	0.750387	0.547634	0	0.319048	0.37431
ENST00000399767	ENSG00000015475	BID	0.309322	0.747	0.561017	0	0.521806	0.36085
ENST00000642017	ENSG00000108439	PNPO	0.203945	0.746596	0.342259	0.400293	0.270009	0.202943
ENST00000626119	ENSG00000111652	COPS7A	0.202278	0.745677	0.24351	0.199542	0.216957	0.343109
ENST00000357235	ENSG00000197622	CDC42SE1	0.052548	0.743611	0.007812	0.007829	4e-06	0.185163
ENST00000612761	ENSG00000153774	CFDP1	0.253993	0.743025	0.121019	0.101952	0.029893	0.524999
ENST00000566846	ENSG00000149925	ALDOA	0.527334	0.742921	0.529991	0.330203	0.839017	0
ENST00000586681	ENSG00000168517	HEXIM2	0.259407	0.741154	0.703075	0.405858	0.415247	0.188988
ENST00000479269	ENSG00000205981	DNAJC19	0.086343	0.738481	0.311684	0.259915	0.625802	0.205665
ENST00000589165	ENSG00000012061	ERCC1	0.153572	0.737895	0.44345	0.617307	0.269065	0.183881
ENST00000297508	ENSG00000164877	MICALL2	0.271004	0.73696	0.666771	0.252261	0.279633	0.605369
ENST00000410038	ENSG00000072163	LIMS2	0.546478	0.734665	0	0	0	0.373956
ENST00000524901	ENSG00000110697	PITPNM1	0.56351	0.733978	0.690403	1.12276	0	0
ENST00000356591	ENSG00000178878	APOLD1	0.204435	0.733673	0.592935	0.00481	0.003743	0.446335
ENST00000549596	ENSG00000187109	NAP1L1	0.069594	0.732658	0.328646	0.655898	0.284579	0.191568
ENST00000361462	ENSG00000198718	TOGARAM1	0.088147	0.73064	0.235984	0.091443	0.185055	0.19913
ENST00000307305	ENSG00000006576	PHTF2	0.36158	0.729061	0.478995	0.204413	0.347447	0.183423
ENST00000339162	ENSG00000120913	PDLIM2	0	0.724848	0.476148	0	0	0
ENST00000297012	ENSG00000164508	HIST1H2AA	0	0.722372	0.224777	0.103782	0.153955	0.267289
ENST00000652094	ENSG00000173486	FKBP2	0.733999	0.720619	0.451343	0.431878	0.308666	0
ENST00000544439	ENSG00000101955	SRPX	0.326086	0.717832	0.227162	0.164944	0.677053	0
ENST00000395497	ENSG00000204310	AGPAT1	0	0.716425	0.01403	0.016018	0.000761	0.016917
ENST00000532852	ENSG00000254469	AP002495.2	0.646914	0.716133	0.489081	0.379523	0.138404	0.433042
ENST00000409018	ENSG00000081177	EXD2	0.145833	0.70818	0.312629	0.171734	0.251057	0.182116
ENST00000503715	ENSG00000124795	DEK	0.043836	0.705486	0.301816	0.354802	0.068369	0
ENST00000372488	ENSG00000171462	DLK2	0.106988	0.704845	0.190443	0.354473	0.168978	0.173868
ENST00000508487	ENSG00000081041	CXCL2	0.200236	0.703547	0.332786	0.129573	0.099482	0.292798
ENST00000473942	ENSG00000170502	NUDT9	0	0.701433	0	0	0	0
ENST00000534458	ENSG00000170903	MSANTD4	0.107579	0.700327	0.251056	0.406345	0.163862	0
ENST00000617531	ENSG00000099991	CABIN1	0.497667	0.700169	0	0.106904	0	0.243792
ENST00000338327	ENSG00000273173	SNURF	0	0.696317	0	0.003686	0.002536	0
ENST00000528938	ENSG00000117152	RGS4	0.048914	0.695905	0.140822	0.075623	0.011751	0.360586
ENST00000522839	ENSG00000164758	MED30	0.243096	0.69109	0.295637	0.337966	0.487574	0.055317
ENST00000456172	ENSG00000181315	ZNF322	0	0.68886	0	0	0.193975	0
ENST00000376286	ENSG00000175198	PCCA	0.565046	0.688854	0.465766	0.201765	0.339256	0.250494
ENST00000410002	ENSG00000136243	NUPL2	0.53126	0.686489	0.232802	0.145682	0.103068	0.15479
ENST00000555503	ENSG00000171723	GPHN	0.070895	0.685502	0.155932	0.065279	0.215607	0.213337
ENST00000397525	ENSG00000184708	EIF4ENIF1	0.240031	0.68437	0.125982	0.019565	0.007565	0.007283
ENST00000513678	ENSG00000015479	MATR3	0	0.683216	0.320123	0	0.011628	0
ENST00000650099	ENSG00000134371	CDC73	0.318844	0.679193	0.000436	0.19972	0.610057	0.014859
ENST00000510047	ENSG00000150756	ATPSCKMT	0.129265	0.67762	0.181492	0.201207	0.317339	0.325476
ENST00000510207	ENSG00000164022	AIMP1	0	0.677401	0.584387	0	0.154341	0.33024
ENST00000439945	ENSG00000074582	BCS1L	0	0.671806	0.237285	0	0	0.35506
ENST00000651354	ENSG00000129103	SUMF2	0.200779	0.670693	0.127041	0	0.056527	0
ENST00000611152	ENSG00000126216	TUBGCP3	0.295093	0.659679	0.544366	0.366478	0.27147	0.40377
ENST00000517814	ENSG00000147679	UTP23	0.006045	0.659382	0.017701	0.044395	0.043593	0.030427
ENST00000645860	ENSG00000115355	CCDC88A	0.288439	0.659329	0.377227	0.354553	0.113007	0.390984
ENST00000420312	ENSG00000112561	TFEB	0	0.659036	0	0	0	0
ENST00000495778	ENSG00000256053	APOPT1	0	0.658992	0	0	0	0
ENST00000346248	ENSG00000182022	CHST15	3.3e-05	0.657786	0	0	0	0
ENST00000450976	ENSG00000175182	FAM131A	0.477066	0.654404	0.406931	0.314275	0.328336	0.27718
ENST00000410051	ENSG00000144366	GULP1	0.114866	0.652198	0.411868	0.17265	0.245068	0.488208
ENST00000393958	ENSG00000173599	PC	0.094363	0.649149	0.171983	0.048327	0.028908	0.189439
ENST00000427217	ENSG00000130429	ARPC1B	0.104946	0.648294	0.442242	0.474623	0.141095	0.171994
ENST00000377139	ENSG00000126456	IRF3	0.287522	0.647464	0.262736	0.325727	0.161901	0.092138
ENST00000567891	ENSG00000140525	FANCI	0.078659	0.646373	0.082607	0.132938	0.053861	0.078175
ENST00000469499	ENSG00000116285	ERRFI1	0.047221	0.645439	0	0	0	0
ENST00000520777	ENSG00000197530	MIB2	0.236821	0.645089	0.368284	0.331365	0.3047	0.29124
ENST00000351393	ENSG00000134759	ELP2	0.009268	0.642721	0.018035	0.000101	0	0.006455
ENST00000529704	ENSG00000175482	POLD4	0.254651	0.642393	0.267126	0.213041	0.113415	0.212669
ENST00000574730	ENSG00000127564	PKMYT1	0.277537	0.637675	0.417682	0	0.132033	0
ENST00000372479	ENSG00000089682	RBM41	0.203999	0.637639	0.206487	0.112345	0.624575	0.080306
ENST00000648895	ENSG00000114861	FOXP1	0.448007	0.635691	0.477858	0.580427	0.152523	0.213737
ENST00000405385	ENSG00000177426	TGIF1	0.343012	0.635598	0.604733	0.265934	0.18077	0.377527
ENST00000553909	ENSG00000259171	AL163636.2	0	0.634781	0.201591	0	0	0
ENST00000376804	ENSG00000120942	UBIAD1	0.299905	0.631282	0.564909	0.291005	0.203861	0.379032
ENST00000285311	ENSG00000155011	DKK2	0.293277	0.630344	0.508984	0.116703	0.09959	0.103934
ENST00000531419	ENSG00000165915	SLC39A13	0.584371	0.628942	0.154689	0.263776	0.19755	0.221939
ENST00000447232	ENSG00000064933	PMS1	0	0.628886	0.153837	0	0	0.045607
ENST00000266971	ENSG00000139531	SUOX	0.209048	0.626676	0.493283	0.408665	0.310194	0.23174
ENST00000466436	ENSG00000102181	CD99L2	0.192953	0.624864	0.6001	0.139354	0.409302	0.159637
ENST00000442528	ENSG00000181830	SLC35C1	0.159562	0.623915	0.594335	0.377063	0.313824	0.331089
ENST00000555437	ENSG00000198894	CIPC	0.038345	0.621676	0.412469	0.28152	0.332498	0.328544
ENST00000649679	ENSG00000168216	LMBRD1	0	0.621117	0	0	0.00628	0.108404
ENST00000267549	ENSG00000140030	GPR65	0.364751	0.620506	0.567079	0.306467	0.186015	0.298807
ENST00000263934	ENSG00000054523	KIF1B	0.061039	0.617409	0.08756	0	0	0
ENST00000395893	ENSG00000187607	ZNF286A	0.094376	0.616476	0.478011	0.312005	0.306724	0.080452
ENST00000264409	ENSG00000138678	GPAT3	0.772982	0.615072	0.535457	0.195627	0.457417	0.207549
ENST00000443094	ENSG00000243477	NAA80	0.322935	0.615043	0	0.076128	0.000367	0.239699
ENST00000449479	ENSG00000132376	INPP5K	0.234578	0.613061	0.178574	0.068229	0.237482	0.283493
ENST00000393276	ENSG00000175984	DENND2C	0.32204	0.612946	0.424811	0.337817	1e-06	0.007528
ENST00000548293	ENSG00000092841	MYL6	0.255712	0.612656	0.543972	0.14181	0.181252	0.245032
ENST00000293525	ENSG00000170442	KRT86	0	0.611212	0.435676	0	0.540293	0
ENST00000396936	ENSG00000100897	DCAF11	0.080881	0.609965	0.126183	0.064181	0.196215	0.43378
ENST00000462761	ENSG00000111669	TPI1	0.018736	0.60572	0	0.215409	0	0.286194
ENST00000554406	ENSG00000092036	HAUS4	0.184309	0.604563	0.054971	0.210664	0.231016	0.209486
ENST00000594720	ENSG00000123815	COQ8B	0.318242	0.60267	0.290871	0.001873	0.36571	0.450895
ENST00000396761	ENSG00000198925	ATG9A	0.104038	0.598923	0.565761	0.155292	0.10654	0.167597
ENST00000330677	ENSG00000120798	NR2C1	0.09788	0.598337	0.532119	0	0.347936	0
ENST00000437179	ENSG00000033867	SLC4A7	0.167041	0.596466	0.19199	0.164962	0.23264	0
ENST00000356436	ENSG00000145979	TBC1D7	0.068139	0.594519	0.000209	0.024311	0.038835	0.045393
ENST00000431275	ENSG00000172296	SPTLC3	0.264837	0.592225	0.303378	0.046314	0.065185	0.615964
ENST00000646560	ENSG00000106367	AP1S1	0.048418	0.591596	0	0.097788	0	0
ENST00000439637	ENSG00000137845	ADAM10	0.01217	0.591222	0	0	0	0
ENST00000531185	ENSG00000149084	HSD17B12	0.123006	0.590858	0.23341	0.211342	0.226937	0.237817
ENST00000574298	ENSG00000162086	ZNF75A	0.254788	0.588802	0.165659	0.174149	0.187067	0.140132
ENST00000557726	ENSG00000072042	RDH11	0.155601	0.584903	0.361566	0.26048	0.186564	0.166208
ENST00000547860	ENSG00000111145	ELK3	0.06425	0.584504	0.009005	0.008862	0.013349	0.014992
ENST00000389534	ENSG00000197608	ZNF841	0.069398	0.583849	0.080378	0.096344	0.101481	0.105911
ENST00000582384	ENSG00000109084	TMEM97	0	0.582348	0.130181	0	0	0
ENST00000337014	ENSG00000169660	HEXD	0.524165	0.581102	0.270059	0.106291	0.295111	0.181162
ENST00000395868	ENSG00000087494	PTHLH	0.054872	0.58097	0.053025	0.085428	0.070175	0.110067
ENST00000555919	ENSG00000119661	DNAL1	0.23067	0.579068	0.220759	0.259299	0.179807	0.270623
ENST00000652309	ENSG00000169255	B3GALNT1	0.461661	0.57872	0.497002	0.033816	0.076211	0.074153
ENST00000576730	ENSG00000225663	MCRIP1	0.09708	0.576579	0.216605	0.067797	0.035429	0.141831
ENST00000593092	ENSG00000072062	PRKACA	0.589166	0.575878	0.52442	0.251877	0.408089	0.193783
ENST00000420605	ENSG00000184162	NR2C2AP	0.515334	0.575584	0.479229	0.434438	0.143959	0.247017
ENST00000353187	ENSG00000109576	AADAT	0	0.574385	0.258182	0.249977	0.257979	0.338793
ENST00000263341	ENSG00000125538	IL1B	0.271187	0.572324	0.266442	0.141528	0.14559	0.252885
ENST00000313324	ENSG00000178397	FAM220A	0.404099	0.572159	0.240548	0.000845	0.270295	0.015078
ENST00000484034	ENSG00000144857	BOC	0.373435	0.569742	0.438463	0.388982	0.056762	0
ENST00000297450	ENSG00000154188	ANGPT1	0.203329	0.568645	0.101082	0.067743	0.060693	0.096178
ENST00000332728	ENSG00000183060	LYSMD4	0.023602	0.567159	0.162645	0.112295	0.042952	0.045861
ENST00000373713	ENSG00000121769	FABP3	0.117709	0.565912	0.438773	0.398849	0.386824	0.089051
ENST00000553681	ENSG00000100823	APEX1	0.126763	0.56585	0.181447	0	0.122666	0
ENST00000642899	ENSG00000101210	EEF1A2	0.299334	0.565578	0	0.264755	0.105495	0.241112
ENST00000546842	ENSG00000123358	NR4A1	0.415988	0.563062	0.411019	0.175818	0	0.092421
ENST00000468777	ENSG00000114054	PCCB	0.252965	0.56261	0.139431	0.290428	0	0.132884
ENST00000611770	ENSG00000160991	ORAI2	0.055148	0.562498	0.034555	0.082398	0	0.033799
ENST00000590625	ENSG00000095752	IL11	0.243364	0.562276	0.213917	0.320377	0.172794	0.145262
ENST00000442250	ENSG00000091409	ITGA6	0.044234	0.561652	0	0.008066	0.004616	0.012208
ENST00000600629	ENSG00000181027	FKRP	0.729008	0.55941	0.517166	0.614801	0.000922	0.131304
ENST00000342555	ENSG00000010244	ZNF207	0.091685	0.55526	0.187142	0.284412	0.186929	0.184243
TCONS_00179309	XLOC_068731	XLOC_068731	0.253266	0.554815	0.18447	0.126742	0.044536	0.068182
ENST00000454181	ENSG00000140280	LYSMD2	0.05252	0.554788	0	0	0	0
ENST00000511258	ENSG00000165671	NSD1	0.43793	0.554085	0.504971	0.362974	0.282742	0.168121
ENST00000434153	ENSG00000170632	ARMC10	0.013794	0.553156	0.415114	0.144353	0.290765	0.200654
ENST00000453014	ENSG00000118965	WDR35	0.151949	0.552518	0.306347	0.34042	0.147397	0.213901
ENST00000540564	ENSG00000057252	SOAT1	0.399673	0.55179	0.359403	0.311823	0.040315	0.214664
ENST00000493275	ENSG00000124508	BTN2A2	0.139172	0.54583	0.125639	0.131668	0.300416	0
ENST00000338379	ENSG00000187475	HIST1H1T	0.021948	0.54458	0.152217	0.086199	0.121594	0.342212
ENST00000620204	ENSG00000118503	TNFAIP3	0.392234	0.544546	0.300263	0.028607	0	0.033127
ENST00000349213	ENSG00000054267	ARID4B	0.040673	0.541877	0.010675	0.002613	0.019246	0.297197
ENST00000644078	ENSG00000120306	CYSTM1	0.234072	0.541264	0.24832	0.289602	0.213646	0.110395
ENST00000591322	ENSG00000010310	GIPR	0.02576	0.541086	0	0	0.015002	0
ENST00000422138	ENSG00000101353	MROH8	0.08262	0.540592	0.377825	0.233184	0.192145	0.240866
ENST00000396836	ENSG00000164509	IL31RA	0.295493	0.53887	0.356125	0.090363	0.290352	0.345149
ENST00000541662	ENSG00000170667	RASA4B	8e-06	0.537578	0.002901	0	0	0
ENST00000474597	ENSG00000124783	SSR1	0	0.535012	0.088152	0.004107	0.580275	0.180353
ENST00000409927	ENSG00000144366	GULP1	0.001859	0.534166	0.255724	0.002376	0.24111	0.05293
ENST00000452980	ENSG00000158062	UBXN11	0.164691	0.53319	0.298144	0.42226	0.101052	0.107457
ENST00000589955	ENSG00000171791	BCL2	0.50719	0.533132	0.307292	0.173443	0.193168	0.007595
ENST00000620009	ENSG00000129173	E2F8	0.324829	0.532361	0.158021	0.126332	0.283104	0.195393
ENST00000508922	ENSG00000164172	MOCS2	0.17858	0.532258	0.119959	0.054301	0.069007	0.212911
ENST00000366974	ENSG00000203705	TATDN3	0.110203	0.532238	0.223791	0.235523	0.120437	0.34073
ENST00000374024	ENSG00000181773	GPR3	0.389556	0.530937	0.268763	0.132158	0.139747	0.159862
ENST00000532672	ENSG00000110330	BIRC2	0.279341	0.530495	0.445759	0.318273	0	0.475137
ENST00000538320	ENSG00000185022	MAFF	0.003714	0.529813	0	0.00683	0	0.00164
ENST00000471876	ENSG00000160753	RUSC1	0.169331	0.529569	0.098249	0.132963	0.083409	0.160522
ENST00000420518	ENSG00000080189	SLC35C2	0	0.52861	0	0	0	0
ENST00000533534	ENSG00000133816	MICAL2	0.016503	0.528022	0.174457	0.047056	0.01261	0
ENST00000432381	ENSG00000034677	RNF19A	0.364438	0.526916	0.252884	0.434869	0.171174	0.060047
ENST00000537332	ENSG00000164442	CITED2	0.307667	0.52687	0.41966	0	0.614054	0
ENST00000538845	ENSG00000111358	GTF2H3	0.002429	0.519553	0	0.07161	0.068333	0
ENST00000552915	ENSG00000111596	CNOT2	0	0.51881	0	0	0	0
ENST00000590201	ENSG00000108639	SYNGR2	0.266374	0.516897	0.436729	0.242114	0.150685	0.16715
ENST00000433749	ENSG00000036549	AC118549.1	0.487003	0.516195	0.34542	0.172977	0.483942	0
ENST00000510516	ENSG00000186687	LYRM7	0	0.5149	0.283533	0.181777	0.317007	0.292416
ENST00000360416	ENSG00000133026	MYH10	0.503753	0.514686	0.280042	0.165609	0.04346	0.249221
ENST00000569243	ENSG00000159459	UBR1	0.000671	0.513506	0.05676	0.035595	0.115553	0.102103
ENST00000589772	ENSG00000173786	CNP	0.073675	0.513341	0.006845	0.016581	0.02169	0.018756
ENST00000645694	ENSG00000126778	SIX1	0.097646	0.512376	0.121491	0.088019	0.004383	0.004493
ENST00000456296	ENSG00000011332	DPF1	0.101571	0.510404	0.251385	0.079306	0.30199	0.116312
ENST00000586427	ENSG00000178904	DPY19L3	0.245725	0.507297	0.137025	0.108567	0.369944	0.163458
ENST00000367582	ENSG00000112419	PHACTR2	0.230284	0.50671	0.436541	0.180718	0.256387	0.292673
ENST00000379433	ENSG00000111859	NEDD9	0.394285	0.504257	0.154268	0.343061	0.114605	0.120738
ENST00000296026	ENSG00000163734	CXCL3	0.068013	0.502872	0.151239	0.112823	0.033792	0.098251
ENST00000370012	ENSG00000148840	PPRC1	0.387859	0.502525	0.268677	0.128866	0.101343	0.190598
ENST00000410026	ENSG00000173559	NABP1	0.634564	0.502244	0.441036	0.19483	0.235815	0.225897
ENST00000559903	ENSG00000068305	MEF2A	0	0.501161	0.279968	0.003097	0	0.005652
ENST00000545859	ENSG00000139112	GABARAPL1	0.282325	0.500659	0.098327	0.11715	0	0
ENST00000450664	ENSG00000183597	TANGO2	0	0.500055	0.098459	0.297208	0	0.312186
ENST00000427810	ENSG00000005801	ZNF195	0.219175	0.498562	0.312229	0.15111	0.17891	0.149947
ENST00000620920	ENSG00000159200	RCAN1	0.049665	0.498004	0.034878	0.049232	0.067232	0.043115
ENST00000505478	ENSG00000109756	RAPGEF2	0.132913	0.497637	0.133819	0.096469	0.263232	0.15686
ENST00000359242	ENSG00000122417	ODF2L	0	0.497138	0.377279	0	0.262194	0.305683
ENST00000313599	ENSG00000177675	CD163L1	0.013524	0.496762	0.022114	0.046696	0.007778	0.013888
ENST00000627305	ENSG00000155368	DBI	0.030033	0.496726	0	0	0.109696	0.092847
ENST00000435161	ENSG00000244462	RBM12	0.088412	0.493298	0.182158	0.258776	0.14237	0.223839
ENST00000548041	ENSG00000062485	CS	0	0.49184	0	0	0	0
ENST00000305949	ENSG00000172167	MTBP	0.10338	0.491154	0.079952	0.08265	0.049749	0.059638
ENST00000357545	ENSG00000196104	SPOCK3	0.0002	0.488054	0.356351	0.352954	9.7e-05	0.39381
ENST00000495488	ENSG00000143801	PSEN2	0	0.487571	0	0	0	0
ENST00000574708	ENSG00000134824	FADS2	0	0.486627	0.436732	0.468416	0	0
ENST00000560787	ENSG00000092098	RNF31	0.182805	0.486626	0.457391	0.052233	0.277038	0.466022
ENST00000579584	ENSG00000176658	MYO1D	0.441976	0.48141	0.298189	0.259388	0.315278	0.015846
ENST00000405953	ENSG00000153094	BCL2L11	0.123356	0.479231	0.080195	0.132816	0.027133	0.143936
ENST00000262197	ENSG00000101546	RBFA	0.043337	0.476762	0.083906	0	0.044529	0.373842
ENST00000428098	ENSG00000198563	DDX39B	0	0.476153	0.270019	0.37591	0	0.095289
ENST00000637481	ENSG00000081189	MEF2C	0	0.472977	0.412002	0	0	0
ENST00000453192	ENSG00000164744	SUN3	0.357049	0.472422	0.419459	0.363614	0.099108	0.092183
ENST00000594527	ENSG00000221983	UBA52	0.187242	0.469895	0.376896	0.166933	0.312858	0.28255
ENST00000439138	ENSG00000006042	TMEM98	0.069571	0.469642	0.219325	0	0	0
ENST00000508453	ENSG00000155016	CYP2U1	0.030526	0.469636	0.003814	0	0	0.052026
ENST00000297857	ENSG00000165156	ZHX1	0.128452	0.467749	0.173149	0.118447	0.152702	0.137706
ENST00000519767	ENSG00000112715	VEGFA	0	0.467284	0	0	0	0.491189
ENST00000551598	ENSG00000187778	MCRS1	0.090769	0.463346	0.30163	0.231648	0.055122	0.236556
ENST00000510400	ENSG00000063438	AHRR	0.169754	0.461886	0.051567	0	0.108961	0.158387
ENST00000301408	ENSG00000189052	CGB5	0.134792	0.459487	0.296008	0.312847	0.227706	0.179935
ENST00000343115	ENSG00000137710	RDX	0.406975	0.459156	0.34459	0.060053	0.3555	0.012569
ENST00000557374	ENSG00000087301	TXNDC16	0	0.458945	0.090244	0	0	0
ENST00000622534	ENSG00000115207	GTF3C2	0.126909	0.458552	0.261492	0.28591	0.206138	0.135288
ENST00000518371	ENSG00000147586	MRPS28	0.144537	0.456352	0.13622	0.174438	0.321166	0.046311
ENST00000391705	ENSG00000131845	ZNF304	0	0.456326	0	0	0	0
ENST00000413605	ENSG00000155111	CDK19	0	0.455882	0	0	0	0
ENST00000479604	ENSG00000107537	PHYH	0.221052	0.453728	0.401884	0.37471	0.243736	0.133372
ENST00000371744	ENSG00000124201	ZNFX1	0.198092	0.453718	0.378846	0.097437	0	0.380408
ENST00000413878	ENSG00000170558	CDH2	0.015424	0.450223	0.017401	0.020531	0.007386	0.001804
ENST00000372296	ENSG00000101843	PSMD10	0.145133	0.449702	0.092364	0.193393	0.175217	0.068262
ENST00000440481	ENSG00000122591	FAM126A	5e-06	0.449033	0	0	0	0
ENST00000301329	ENSG00000167699	GLOD4	0.088802	0.448662	0.42289	0.232427	0.243511	0.303141
ENST00000348904	ENSG00000164746	C7orf57	0.165306	0.448051	0.227781	0.130945	0.19452	0.231048
ENST00000447121	ENSG00000164305	CASP3	0	0.447655	0.279058	0.095181	0.139953	0.062041
ENST00000604555	ENSG00000120708	TGFBI	0.085423	0.446398	0.343626	0.016757	0.096364	0.214066
ENST00000427190	ENSG00000198814	GK	0	0.444263	0.255663	7.6e-05	0.000531	0.403425
ENST00000582252	ENSG00000108588	CCDC47	0.135129	0.444194	0.082572	0.182093	0.116299	0.138771
ENST00000643713	ENSG00000119139	TJP2	0.311945	0.44205	0.3036	0	0.256141	0
ENST00000647779	ENSG00000285815	WRB-SH3BGR	0	0.440535	0.028899	0.018607	0.103017	0
ENST00000636287	ENSG00000182220	ATP6AP2	0.042014	0.440093	0.130814	0.287888	0.100327	0.231334
ENST00000594202	ENSG00000130475	FCHO1	0.010508	0.439036	0.282135	0.164102	0.206652	0.182108
ENST00000417748	ENSG00000003402	CFLAR	0.079755	0.438761	0.259324	0.260941	0.086768	0.124305
ENST00000420410	ENSG00000145012	LPP	0.183262	0.436285	0.122465	0.194091	0.029097	0.213336
ENST00000440806	ENSG00000117758	STX12	0.006535	0.433253	0.005319	0.048718	0.077593	0.079254
ENST00000507572	ENSG00000124279	FASTKD3	0.182461	0.433153	0.328248	0.050331	0.263924	0.237083
ENST00000372809	ENSG00000168389	MFSD2A	0.352945	0.433032	0.238292	0	0.070209	0.02341
ENST00000440600	ENSG00000143493	INTS7	0.126661	0.431881	0.312838	0	0	0
ENST00000372277	ENSG00000133678	TMEM254	0.011741	0.430505	0.322276	0	0.121342	0.15122
ENST00000478909	ENSG00000184220	CMSS1	0.175641	0.430129	0.31499	0.32153	0.250951	0.103395
ENST00000412056	ENSG00000214078	CPNE1	0.130932	0.429712	0.166224	0.098131	0.027007	0.021752
ENST00000373645	ENSG00000079263	SP140	0.058558	0.428482	0.155124	0.076113	0.132654	0.05807
ENST00000506990	ENSG00000113594	LIFR	0.013283	0.428173	0.197411	0.029576	0.12707	0.332535
ENST00000424486	ENSG00000166292	TMEM100	0.244326	0.428125	0.143538	0.047202	0.179233	0.115378
ENST00000255486	ENSG00000133121	STARD13	0.002131	0.42662	0.002076	0.000955	0.001704	0.0014
ENST00000453650	ENSG00000121481	RNF2	0.136886	0.425175	0.125507	0	0.053272	0.004832
ENST00000416795	ENSG00000124508	BTN2A2	0.000919	0.424946	0.07404	0.011626	0.003675	0.089611
ENST00000515815	ENSG00000073578	SDHA	0	0.424761	0	0	0	0.065
ENST00000360482	ENSG00000134668	SPOCD1	0.146554	0.424115	0.331303	0.3335	0.06254	0.112535
ENST00000508022	ENSG00000180104	EXOC3	0.024523	0.423723	0.038298	0.074862	0.161323	0.187365
ENST00000618771	ENSG00000076604	TRAF4	0.051586	0.423336	0.093917	0.129273	0.093046	0.205616
ENST00000614176	ENSG00000114861	FOXP1	0.352172	0.423025	0.181921	0.033849	0.162322	0.057124
ENST00000512561	ENSG00000085231	AK6	0.076751	0.422614	0.137886	0.189615	0	0.121274
ENST00000419958	ENSG00000117748	RPA2	0.201276	0.421271	0.218356	0.263315	0.197189	0.130871
ENST00000497653	ENSG00000090097	PCBP4	0	0.420678	0	0	0	0
ENST00000618024	ENSG00000274276	CBSL	0	0.420077	0	0	0	0
ENST00000545470	ENSG00000211455	STK38L	0.061747	0.41973	0.279403	0.179069	0.070689	0.214518
ENST00000372988	ENSG00000112576	CCND3	0.02396	0.419629	0.061336	0.094202	0.04744	0.099352
ENST00000543615	ENSG00000139146	SINHCAF	0.12058	0.41941	0.252325	0.243595	0.072618	0.076178
ENST00000587077	ENSG00000178904	DPY19L3	0.299402	0.418933	0.201947	0.120484	0.224861	0.158127
ENST00000374038	ENSG00000131051	RBM39	0.159045	0.418766	0.153181	0.196961	0.126149	0.167065
ENST00000455695	ENSG00000183054	RGPD6	0.286073	0.41233	0.211422	0.210822	0.165037	0.175975
ENST00000378409	ENSG00000159884	CCDC107	0.001334	0.411328	0.000409	0.000506	0.000254	0.003378
ENST00000538155	ENSG00000064102	INTS13	0.154685	0.411218	0.153222	0.13844	0.139844	0.139352
ENST00000377102	ENSG00000136158	SPRY2	0.148974	0.409224	0.239259	0.155519	0.084874	0.266574
ENST00000465538	ENSG00000172954	LCLAT1	0.229427	0.408511	0.297114	0.047094	0.166259	0.229192
ENST00000433243	ENSG00000085276	MECOM	0	0.407808	0	0	0	0
ENST00000440628	ENSG00000114353	GNAI2	0.044888	0.407803	0.112335	0.146063	0.006973	0.163217
ENST00000472304	ENSG00000136869	TLR4	0.000117	0.407591	0.156836	0.068382	0.130773	0.247269
ENST00000644526	ENSG00000136631	VPS45	0	0.404605	0.375037	0	0.439047	0
ENST00000589454	ENSG00000130811	EIF3G	0.142162	0.404427	0.297534	0.282958	0.237093	0.101028
ENST00000421929	ENSG00000116044	NFE2L2	0.1118	0.403768	0	0	0	0.279802
ENST00000322813	ENSG00000005238	FAM214B	0.100369	0.402176	0.071004	0.078746	0.041466	0.127475
ENST00000530750	ENSG00000149809	TM7SF2	0	0.401085	0.047327	0	0	0
ENST00000626563	ENSG00000143742	SRP9	0.014277	0.40036	0.015068	0.009856	0.013498	0.015237
ENST00000449811	ENSG00000149532	CPSF7	0	0.400207	0	0	0	0
ENST00000256186	ENSG00000133816	MICAL2	0.227982	0.399191	0.195939	0	0	0
ENST00000420190	ENSG00000187634	SAMD11	0.090102	0.398484	0.216651	0.117926	0.098865	0.104075
ENST00000461546	ENSG00000143748	NVL	0.147748	0.398155	0.318158	0.329901	0.163825	0.057215
ENST00000555341	ENSG00000165948	IFI27L1	0.14125	0.397858	0.130848	0.047268	0.111882	0.217981
ENST00000394598	ENSG00000164093	PITX2	0.349591	0.396903	0.373586	0.015449	0.014586	0.359387
ENST00000366528	ENSG00000203667	COX20	0.002968	0.395926	0.035924	0.043462	0	0.002077
ENST00000436021	ENSG00000139372	TDG	0.029875	0.395705	0.142827	0.221144	0.031245	0.04429
ENST00000614445	ENSG00000167085	PHB	0.149524	0.395419	0.27272	0.021147	0.325511	0.001789
ENST00000356738	ENSG00000113108	APBB3	0	0.393957	0	0	0	0.325691
ENST00000552350	ENSG00000135454	B4GALNT1	0.068688	0.393617	0.357699	0.191252	0.295348	0.216783
ENST00000220244	ENSG00000103888	CEMIP	0.20946	0.392548	0.238893	0.113338	0.100866	0.032011
ENST00000264424	ENSG00000061918	GUCY1B1	0.270962	0.392173	0	0	0.252245	0.108953
ENST00000540996	ENSG00000211455	STK38L	0.105838	0.392062	0.218104	0.106557	0.017613	0.076309
ENST00000504461	ENSG00000134853	PDGFRA	0.057889	0.390783	0.245326	0.11348	0.092915	0
ENST00000427263	ENSG00000180190	TDRP	0	0.390155	0	0	0	0.310007
ENST00000579838	ENSG00000125450	NUP85	0.145563	0.389596	0.185944	0.056649	0.111823	0.286399
ENST00000505992	ENSG00000151247	EIF4E	0.060653	0.389034	0.101145	0.17621	0.155076	0.101055
ENST00000553664	ENSG00000165948	IFI27L1	0.061375	0.388946	0.331566	0.111874	0.090284	0.244976
ENST00000290378	ENSG00000159251	ACTC1	0.313034	0.388858	0.357481	0.192993	0.154056	0.129955
ENST00000523904	ENSG00000064313	TAF2	0.408582	0.388137	0.203543	0.260741	0.055413	0.088747
ENST00000319107	ENSG00000136828	RALGPS1	0.168086	0.38813	0.109391	0	0.179279	0.260202
ENST00000515098	ENSG00000145916	RMND5B	0.024333	0.387106	0.303725	0.116704	0.165752	0.258728
ENST00000438237	ENSG00000144645	OSBPL10	0.073607	0.386123	0.102966	0.121513	0.188446	0
ENST00000294984	ENSG00000162892	IL24	0.182075	0.385384	0.085569	0.111091	0.205447	0.040668
ENST00000494943	ENSG00000173889	PHC3	0.05757	0.381823	0.060283	0.056959	0.053855	0.043767
ENST00000396763	ENSG00000102103	PQBP1	0	0.381144	0.274708	0	0	0.324971
ENST00000589781	ENSG00000130208	APOC1	0.098516	0.38017	0.124437	0.185189	0.089709	0.24026
ENST00000638719	ENSG00000250298	GIMD1	0.079413	0.380162	0.074869	0.076617	0.031627	0.031709
ENST00000424091	ENSG00000106330	MOSPD3	0.108629	0.380006	0.131786	0	0.180671	0.187996
ENST00000555458	ENSG00000142208	AKT1	0.090859	0.378944	0.147062	0.15676	0.116596	0.102664
ENST00000537992	ENSG00000105855	ITGB8	0.109814	0.378547	0.052869	0.001007	0.003654	0.297074
ENST00000552496	ENSG00000059758	CDK17	0	0.378539	0.239086	0	0	0.151661
ENST00000369327	ENSG00000135341	MAP3K7	0.412446	0.378059	0.318461	0.116792	0.067721	0.242786
ENST00000330828	ENSG00000182993	C12orf60	4e-05	0.375905	0.000122	0	0.211679	0.240947
ENST00000640385	ENSG00000243335	KCTD7	0.298905	0.373626	0.249306	0.27311	0.210392	0
ENST00000392429	ENSG00000164484	TMEM200A	0.028661	0.373614	0.216607	0	0	0
ENST00000513252	ENSG00000081189	MEF2C	0.109213	0.371831	0.291886	0.199196	0.147659	0
ENST00000438392	ENSG00000203756	TMEM244	0.335992	0.371491	0.236613	0.010407	0	0.234889
ENST00000318782	ENSG00000162073	PAQR4	0.092697	0.371266	0.097654	0.024256	0.121079	0.283728
ENST00000392467	ENSG00000141524	TMC6	0.022006	0.371117	0.124645	0.018602	0.041335	0.027155
ENST00000523108	ENSG00000161013	MGAT4B	0.246115	0.37111	0.259702	0.220617	0	0
ENST00000355774	ENSG00000119684	MLH3	0.050474	0.370921	0.301216	0.405798	0.056938	0.019369
ENST00000618539	ENSG00000079459	FDFT1	0	0.370832	0	0	0	0
ENST00000531273	ENSG00000166181	API5	0.10399	0.37031	0.101885	0.023546	0.188762	0.245156
ENST00000354147	ENSG00000138777	PPA2	0.113004	0.369795	0.29809	0	0.407617	0
ENST00000543482	ENSG00000140563	MCTP2	0.136736	0.368906	0.138446	0.016312	0.164588	0.084048
ENST00000538336	ENSG00000122642	FKBP9	0.044136	0.368753	0.046103	0.140323	0.045585	0.210186
ENST00000610757	ENSG00000078070	MCCC1	0.077309	0.368397	0.018349	0	0	0
ENST00000261443	ENSG00000009307	CSDE1	0.08544	0.366944	0.170181	0.067234	0.034362	0.076982
ENST00000446700	ENSG00000033867	SLC4A7	0	0.366068	0.187502	0	0	0
ENST00000513320	ENSG00000151612	ZNF827	0	0.366055	0	0	0	0
ENST00000274625	ENSG00000156427	FGF18	0.246936	0.365955	0.070568	0.039255	0.1442	0.127799
ENST00000375677	ENSG00000197183	NOL4L	0.056565	0.365762	0.329873	0.125055	0.362894	0.095581
ENST00000370332	ENSG00000162676	GFI1	0.053945	0.365644	0	0	0	0.180057
ENST00000321301	ENSG00000175768	TOMM5	0.001656	0.365266	0.011397	0.018737	0.031479	0.010911
ENST00000489681	ENSG00000143811	PYCR2	0	0.363992	0.271154	0.147673	0.089637	0.144145
ENST00000409684	ENSG00000273045	C2orf15	0.214452	0.363281	0.123642	0.246961	0.009564	0.16244
ENST00000520892	ENSG00000169398	PTK2	0.262713	0.363011	0.227152	0.043903	0.00317	0.308542
ENST00000235453	ENSG00000213047	DENND1B	0.370983	0.362079	0.275538	0.198894	0.009727	0.220106
ENST00000402306	ENSG00000106608	URGCP	0.087193	0.36147	0.077807	0.103573	0.220827	0.095041
ENST00000464394	ENSG00000119636	BBOF1	0.110647	0.360755	0.051366	0.107242	0.249055	0.093293
ENST00000551145	ENSG00000161800	RACGAP1	0.024943	0.359945	0.085167	0.044272	0.064282	0.261163
ENST00000373366	ENSG00000188910	GJB3	0.168825	0.359531	0.077564	0.038081	0.083443	0.098564
ENST00000434194	ENSG00000171552	BCL2L1	0.098155	0.359343	0	0.105894	0	0.210656
ENST00000394288	ENSG00000138709	LARP1B	0.005055	0.358307	0.01105	0.00522	0.002512	0.002715
ENST00000541866	ENSG00000111652	COPS7A	0.025823	0.358107	0.020472	0.006379	0.008723	0.027698
ENST00000435572	ENSG00000123405	NFE2	0.179148	0.358027	0.211937	0.09636	0.177959	0.246859
ENST00000226578	ENSG00000109323	MANBA	0.005618	0.357716	0.022642	0.001	0.066002	0.27135
ENST00000438709	ENSG00000196912	ANKRD36B	0.095174	0.355228	0.124918	0.058736	0.138597	0.04877
ENST00000543337	ENSG00000129562	DAD1	0.052135	0.35493	0	0	0	0.034872
ENST00000380281	ENSG00000110844	PRPF40B	0.119845	0.354851	0.098298	0.091349	0.116443	0.077185
ENST00000523481	ENSG00000034677	RNF19A	0.190461	0.354651	0.096639	0.125808	0.099666	0.129703
ENST00000537531	ENSG00000142910	TINAGL1	0	0.353925	0	0	0	0
ENST00000650960	ENSG00000140694	PARN	0.219169	0.353665	0.026611	0.022642	0.017203	0.008847
ENST00000414651	ENSG00000115286	NDUFS7	0.243873	0.353471	0.174814	0	0	0
ENST00000359709	ENSG00000163565	IFI16	0.056344	0.352134	0	0	0	0
ENST00000562428	ENSG00000159593	NAE1	0.001265	0.351296	0.095048	0	0.045222	0
ENST00000424307	ENSG00000064933	PMS1	0	0.351104	0.037269	0.058501	0	0.009131
ENST00000336086	ENSG00000106608	URGCP	0.111579	0.351091	0.040865	0.065006	0.053478	0.06587
ENST00000554924	ENSG00000165898	ISCA2	0	0.349922	0	0	0	0.018261
ENST00000599296	ENSG00000196705	ZNF431	0.115771	0.349687	0.059134	0.184513	0	0.221898
ENST00000378106	ENSG00000101247	NDUFAF5	0.060183	0.34767	0.043384	0.095323	0.189651	0.153325
ENST00000555981	ENSG00000137070	IL11RA	0.110987	0.347125	0.056552	0.023482	0.091929	0.077379
ENST00000567671	ENSG00000103769	RAB11A	0.084157	0.347028	0.336968	0.410847	0.102582	0.046417
ENST00000473389	ENSG00000101901	ALG13	0.003449	0.346461	0.210146	0.108864	0.138424	0.001401
ENST00000497105	ENSG00000119185	ITGB1BP1	0	0.345262	0.145536	0	0.300053	0
ENST00000440156	ENSG00000033867	SLC4A7	0	0.343596	0.115121	0	0	0
ENST00000398841	ENSG00000090238	YPEL3	0.118154	0.343419	0.100356	0.057421	0.140588	0.130202
ENST00000409510	ENSG00000173559	NABP1	0.046392	0.342383	0	0	0	0
ENST00000546737	ENSG00000089060	SLC8B1	0.182775	0.339022	0.192336	0.101077	0.228291	0.112115
ENST00000580613	ENSG00000154957	ZNF18	0.159674	0.338832	0.09695	0.027514	0.020492	0.052688
ENST00000512894	ENSG00000182923	CEP63	0.039024	0.338441	0.211808	0.050266	0.033297	0.015304
ENST00000508216	ENSG00000163110	PDLIM5	0.050263	0.337225	0	9e-05	0.030666	1e-06
ENST00000480184	ENSG00000077157	PPP1R12B	0.004258	0.336547	0.000364	0.000507	5e-06	0.384589
ENST00000399640	ENSG00000008513	ST3GAL1	0.028115	0.33537	0.035289	0.020421	0.015265	0.003848
ENST00000369939	ENSG00000116299	KIAA1324	0.06802	0.33406	0.212681	0.204059	0.09038	0
ENST00000563177	ENSG00000174939	ASPHD1	0.045854	0.333476	0.24971	0.187521	0.058799	0.181922
ENST00000528079	ENSG00000198431	TXNRD1	0.284354	0.332942	0.30139	0.164374	0.194755	0.150912
ENST00000523558	ENSG00000040341	STAU2	0	0.332661	0.031261	0	0.038189	0.030038
ENST00000614878	ENSG00000198720	ANKRD13B	0	0.332517	0	0	0	0.19763
ENST00000514428	ENSG00000142599	RERE	0.273018	0.332426	0	0.062994	0	0.175204
ENST00000335171	ENSG00000147475	ERLIN2	0	0.330658	0	0	0	0.128996
ENST00000545805	ENSG00000102078	SLC25A14	0.095097	0.330436	0.197099	0	0.183997	0.11445
ENST00000523839	ENSG00000197275	RAD54B	0.237082	0.330275	0.223692	0.0178	0.008284	0.006592
ENST00000524257	ENSG00000169398	PTK2	0.198896	0.329698	0.212553	0	0.045469	0.151027
ENST00000605953	ENSG00000147687	TATDN1	0.048505	0.329292	0.2769	0.103489	0.036606	0.238833
ENST00000562305	ENSG00000172137	CALB2	0	0.328598	0	0	0	0
ENST00000520973	ENSG00000147526	TACC1	0.05414	0.328506	0.01982	0.02757	0.036854	0.045621
ENST00000392680	ENSG00000150455	TIRAP	0	0.327497	0.201632	0	0	0.129309
ENST00000359393	ENSG00000110047	EHD1	0	0.327433	0	0	0	0
ENST00000543504	ENSG00000120647	CCDC77	0.000372	0.327399	0	0.003322	0.004379	0.000205
ENST00000645725	ENSG00000127990	SGCE	0.026057	0.326619	0	0	0.038842	0.023786
ENST00000515665	ENSG00000168685	IL7R	0.18633	0.326138	0.152574	0.16178	0.100699	0.076629
ENST00000508164	ENSG00000048140	TSPAN17	0.031163	0.325994	0.033197	0.007304	0.07657	0.018593
ENST00000361936	ENSG00000143409	MINDY1	0	0.325904	0	0	0	0.266637
ENST00000649170	ENSG00000182093	WRB	0	0.325795	0.109078	0	0.510873	0
ENST00000562707	ENSG00000140931	CMTM3	0	0.325525	0	0	0	0
ENST00000438261	ENSG00000143977	SNRPG	0.086629	0.324775	0.054997	0.174416	0.056214	0.14736
ENST00000592033	ENSG00000171302	CANT1	0	0.322779	0.216215	0.218296	0.034445	0.267695
ENST00000625444	ENSG00000095261	PSMD5	0	0.321873	0.109209	0.110167	0.177936	0.157058
ENST00000317509	ENSG00000140332	TLE3	0.142807	0.31975	0.167583	0	0.111351	0.195509
ENST00000539518	ENSG00000173391	OLR1	0.091919	0.319571	0.09071	0.171088	0.09674	0.161556
ENST00000508500	ENSG00000160789	LMNA	0.004097	0.319364	0.006433	0.032231	0.013039	0.005471
ENST00000444746	ENSG00000080345	RIF1	0.00744	0.318225	0.158249	0.212594	0.019224	0.189122
ENST00000531321	ENSG00000149809	TM7SF2	0	0.318025	0.193537	0	0	0
ENST00000265052	ENSG00000074416	MGLL	0.068186	0.317308	0.096921	0.002437	0.000325	0.031797
ENST00000522176	ENSG00000120137	PANK3	0.258847	0.317081	0.256397	0.061513	0.09998	0.130748
ENST00000373887	ENSG00000056558	TRAF1	0.127896	0.316878	0.258324	0.064982	0.042489	0.029509
ENST00000594350	ENSG00000161677	JOSD2	0.118361	0.316454	0.204285	0.142776	0.174382	0.050508
ENST00000538721	ENSG00000185813	PCYT2	0.031016	0.315983	0.128047	0.015593	0.005478	0.195528
ENST00000443872	ENSG00000124357	NAGK	0.156107	0.315815	0	0.090918	0	0.065442
ENST00000590859	ENSG00000129990	SYT5	0.122367	0.31464	0.272556	0.158987	0	0
ENST00000344327	ENSG00000137672	TRPC6	0.339282	0.314058	0.212958	0.07148	0.083999	0.15828
ENST00000530820	ENSG00000135387	CAPRIN1	0.13611	0.313238	0.081168	0.155076	0.148209	0.085067
ENST00000300658	ENSG00000161395	PGAP3	0.017988	0.312532	0.191082	0.282804	0.046726	0.135696
ENST00000620958	ENSG00000112312	GMNN	0.030576	0.311749	0.043006	0.036812	0.045286	0.304016
ENST00000509245	ENSG00000164039	BDH2	0.146412	0.311376	0.17716	0	0.191569	0.205912
ENST00000422098	ENSG00000101966	XIAP	0.10653	0.31073	0.002792	0.000879	0.003892	0.000788
ENST00000519811	ENSG00000105339	DENND3	0.224692	0.308301	0.128333	0.06635	0.221403	0.065742
ENST00000554336	ENSG00000258947	TUBB3	0.016143	0.307003	0.18387	0.000346	0.383486	0.001835
ENST00000409349	ENSG00000169604	ANTXR1	0.010153	0.306093	0.249977	0.063501	0	0.302296
ENST00000265239	ENSG00000114473	IQCG	7.6e-05	0.30378	0.082016	4.9e-05	0.342851	0.082479
ENST00000559532	ENSG00000100664	EIF5	0	0.30267	0.191231	0.004366	0.320082	0
ENST00000430533	ENSG00000138073	PREB	0.12755	0.302179	0.156584	0.108968	0.117864	0.154476
ENST00000528911	ENSG00000141971	MVB12A	0	0.301643	0	0	0	0
ENST00000242607	ENSG00000122986	HVCN1	0.054626	0.301198	0.139247	0.127377	0.093975	0.196552
ENST00000472726	ENSG00000256500	AL139300.1	0	0.298863	0	0	0	0
ENST00000406575	ENSG00000136244	IL6	0.136018	0.298501	0.108567	0.072344	0.190339	0.0839
ENST00000502316	ENSG00000063978	RNF4	0.041782	0.297506	0.190798	0.007931	0.456286	0.01951
ENST00000416905	ENSG00000100297	MCM5	0.047674	0.297286	0.101963	0.071051	0.107104	0
ENST00000401931	ENSG00000169429	CXCL8	0.001041	0.297083	0.027036	0.030458	0.029381	0.084407
ENST00000555321	ENSG00000126804	ZBTB1	0.255731	0.296812	0.253208	0.096573	0.061233	0.230912
ENST00000513274	ENSG00000184432	COPB2	0	0.296517	0.221349	0.204049	0	0
ENST00000422087	ENSG00000135241	PNPLA8	0.101848	0.295873	0.016439	0.027749	0.239855	0.060396
ENST00000306433	ENSG00000168495	POLR3D	0.184375	0.295393	0.209531	0.096527	0.194251	0.094871
ENST00000508686	ENSG00000164338	UTP15	6.9e-05	0.295217	0.000747	0.002211	0.003393	0.00166
ENST00000467404	ENSG00000171735	CAMTA1	0	0.294285	0	0	0	0
ENST00000359646	ENSG00000244462	RBM12	0.143147	0.29374	0.025593	0.046284	0.228664	0.049784
ENST00000526158	ENSG00000117640	MTFR1L	2e-06	0.293663	0	0	0	0
ENST00000505184	ENSG00000168785	TSPAN5	0.042106	0.292269	0.032783	0.064003	0	0.057616
ENST00000553333	ENSG00000197045	GMFB	0.019898	0.292115	0.048244	0.011808	0.074523	0.057189
ENST00000552388	ENSG00000135446	CDK4	0.194506	0.291653	0.26737	0.055823	0	0.064369
ENST00000581806	ENSG00000108654	DDX5	0.064369	0.291621	0.088341	0.043341	0	0.161348
ENST00000563971	ENSG00000103429	BFAR	0.146373	0.291496	0.204965	0.09695	0.102927	0.058373
ENST00000539994	ENSG00000111358	GTF2H3	0.119304	0.290885	0.05674	0	0.060808	0.089089
ENST00000342818	ENSG00000189195	BTBD8	0.207279	0.290346	0.037662	0.119481	0.039147	0.084429
ENST00000511107	ENSG00000164182	NDUFAF2	0.029159	0.289752	0.143022	0.035786	0.263441	0.053752
ENST00000583088	ENSG00000184185	KCNJ12	0.102478	0.289304	0.257369	0.067478	0.031279	0.035018
ENST00000645526	ENSG00000180488	MIGA1	0	0.288326	0	0	0	0
ENST00000275560	ENSG00000146700	SSC4D	0.073255	0.288013	0.166614	0.090583	0.077162	0.042858
ENST00000432556	ENSG00000173391	OLR1	0.14929	0.287682	0.213524	0.201827	0.133063	0.066567
ENST00000553635	ENSG00000100650	SRSF5	0	0.28699	0.271892	0.151303	0	0
ENST00000570235	ENSG00000087258	GNAO1	0.002404	0.286372	0	0	0	0
ENST00000523911	ENSG00000176623	RMDN1	0	0.284837	0.263688	0.017455	0	0.33603
TCONS_00000622	XLOC_000449	XLOC_000449	0	0.284492	0	0	0	0
ENST00000245564	ENSG00000125459	MSTO1	0	0.284117	0.235108	0.225226	0	0.224471
ENST00000426255	ENSG00000242110	AMACR	0.124071	0.282934	0.221445	0.135229	0.209702	0.003344
ENST00000361692	ENSG00000116001	TIA1	0.210282	0.282878	0.126035	0.107796	0.141902	0.085376
ENST00000575989	ENSG00000175866	BAIAP2	0.190059	0.282783	0.17382	0.108423	0.037528	0.092483
ENST00000524238	ENSG00000147421	HMBOX1	0	0.282742	0.110709	0.140838	0.137466	0
ENST00000540924	ENSG00000174718	RESF1	0	0.282592	0.264423	0.059388	0.063581	0.272646
ENST00000437738	ENSG00000177565	TBL1XR1	0.10645	0.282179	0.248763	0	0.245923	0.134494
ENST00000336509	ENSG00000092931	MFSD11	0	0.280837	0	0	0	0
ENST00000458310	ENSG00000175449	RFESD	0	0.280767	0.209283	0.304224	0	0
ENST00000224652	ENSG00000107669	ATE1	0.059112	0.28055	0.111606	0.003079	0.248342	0.118607
ENST00000528565	ENSG00000141279	NPEPPS	0.143853	0.280234	0.121652	0.245074	0	0.030572
ENST00000321117	ENSG00000119772	DNMT3A	0.004714	0.279195	0.183152	0	0	0.355318
ENST00000588361	ENSG00000127663	KDM4B	0.018244	0.27892	0.016712	0.049095	0.042606	0.043843
ENST00000422843	ENSG00000113263	ITK	0.180453	0.278682	0.108178	0.056033	0.07116	0.10454
ENST00000397664	ENSG00000130731	METTL26	0.223447	0.278491	0.16718	0.107083	0.07618	0.139912
ENST00000418724	ENSG00000236104	ZBTB22	0.001689	0.277494	0.000872	0.000134	0.000934	0.000898
ENST00000392092	ENSG00000112592	TBP	0.043655	0.277096	0.057566	0.070371	0.048186	0.140391
ENST00000587975	ENSG00000198858	R3HDM4	0	0.277031	0.236184	0	0	0
ENST00000357302	ENSG00000184371	CSF1	0.088596	0.276885	0.097304	0.042373	0.038068	0.105978
ENST00000454000	ENSG00000142794	NBPF3	0.141079	0.276771	0	0.009854	0.319947	0
ENST00000543447	ENSG00000107669	ATE1	0.074794	0.276693	0	0.044768	0	0
ENST00000375802	ENSG00000099246	RAB18	0	0.276559	0	0	0	0
ENST00000503818	ENSG00000164038	SLC9B2	0.0388	0.276342	0	0	0	0.053065
ENST00000644902	ENSG00000109756	RAPGEF2	0.135221	0.276245	0.127428	0.100894	0.062959	0.078791
ENST00000351581	ENSG00000181625	SLX1B	1.2e-05	0.275549	1.5e-05	5e-06	9e-06	7e-06
ENST00000453196	ENSG00000100503	NIN	0.089268	0.275482	0.093433	0.057729	0.051214	0.137272
ENST00000404790	ENSG00000115970	THADA	0.170735	0.273844	0.214901	0.212591	0.138784	0.011266
ENST00000438528	ENSG00000176209	SMIM19	0.162981	0.272722	0.195041	0.125444	0.137974	0.102532
ENST00000535480	ENSG00000006118	TMEM132A	0	0.271722	0.23536	0	0	0
ENST00000409797	ENSG00000090924	PLEKHG2	0.190773	0.271102	0.094671	0.021512	0.120184	0.087303
ENST00000406900	ENSG00000096717	SIRT1	0.002018	0.27094	0.071039	0.004818	0.00098	0
ENST00000453526	ENSG00000134986	NREP	0	0.270748	0	0	0	0
ENST00000336378	ENSG00000172661	WASHC2C	0.129397	0.270123	0.213194	0.082517	0.19798	0.149502
ENST00000471350	ENSG00000148444	COMMD3	0.067968	0.269879	0.063594	0.045114	0.228939	0.065443
ENST00000315792	ENSG00000176907	TCIM	0.072263	0.269302	0.050684	0.039483	0.04526	0.148295
ENST00000395060	ENSG00000106665	CLIP2	0.007828	0.268177	0.169603	0	0	0.229794
ENST00000518283	ENSG00000153310	FAM49B	0.00301	0.268045	0.226284	0.007571	0.001341	0.178307
ENST00000373302	ENSG00000136854	STXBP1	0.145167	0.267562	0.004665	0.040379	0.058604	0.122869
ENST00000450485	ENSG00000184445	KNTC1	0	0.267502	0.106516	0.039056	0	0
ENST00000334232	ENSG00000186197	EDARADD	0.058637	0.267461	0.212908	0.02507	0	0.056659
ENST00000443281	ENSG00000197632	SERPINB2	0.017974	0.267359	0.005613	0.029074	0	0.029682
ENST00000450200	ENSG00000114331	ACAP2	0.020353	0.267348	0.087314	0.103496	0.091049	0.12426
ENST00000367391	ENSG00000143355	LHX9	0.038224	0.266623	0.028249	0	0	0.005321
ENST00000545499	ENSG00000133069	TMCC2	0.001767	0.265967	0.000708	0.000198	0	0
ENST00000422125	ENSG00000106853	PTGR1	0.080151	0.265305	0.207539	0.170866	0.287199	0
ENST00000418236	ENSG00000145819	ARHGAP26	0.094892	0.264404	0	0	0	0
ENST00000379997	ENSG00000147894	C9orf72	0.022213	0.264276	0.103959	0.081186	0.051148	0.060577
ENST00000567744	ENSG00000138614	INTS14	0.273417	0.263761	0.062264	0.039266	0.254846	0
ENST00000469949	ENSG00000095794	CREM	0	0.263331	0.244173	0.018796	0	0
ENST00000548688	ENSG00000135486	HNRNPA1	0	0.262457	0	0	0	0
ENST00000340840	ENSG00000124496	TRERF1	0.287945	0.262431	0.160747	0.153771	0.122012	0.019567
ENST00000559930	ENSG00000185787	MORF4L1	0	0.261725	0.234516	0.092884	0.068988	0.107859
ENST00000414236	ENSG00000163832	ELP6	0.116739	0.261474	0.178635	0.112899	0.132981	0.131273
ENST00000432977	ENSG00000147124	ZNF41	0.082388	0.260984	0.087285	0.046588	0.144728	0.109526
ENST00000553640	ENSG00000092094	OSGEP	0.105857	0.260551	0.118372	0.110144	0.112548	0.103657
ENST00000493014	ENSG00000151576	QTRT2	0.0798	0.26051	0.209985	0.082322	0.248631	0.117375
ENST00000623693	ENSG00000127922	SEM1	0.184674	0.259779	0.106182	0.156053	0.010342	0.083316
ENST00000592574	ENSG00000267261	AC099811.2	0	0.259593	0	0	0	0
ENST00000416255	ENSG00000115539	PDCL3	0.086214	0.259542	0.143709	0.106651	0.007986	0.168605
ENST00000546079	ENSG00000104853	CLPTM1	0	0.259232	0	0	0	0
ENST00000528462	ENSG00000165912	PACSIN3	0	0.258897	0	0.002283	0	0.002608
ENST00000533276	ENSG00000137502	RAB30	0.007284	0.257541	0.049556	0	0	0.033282
ENST00000234590	ENSG00000074800	ENO1	0.1523	0.256668	0.002359	0.017216	0.004543	0.124873
ENST00000397817	ENSG00000103152	MPG	0	0.256624	0.190795	0	0	0
ENST00000416337	ENSG00000215012	RTL10	0.198995	0.255959	0.187275	0.11682	0.155093	0.022926
ENST00000597586	ENSG00000105771	SMG9	0	0.254869	0.048051	0	0.13963	0.12965
ENST00000338530	ENSG00000115648	MLPH	0.177162	0.253908	0.171172	0.101643	0.001605	0.073383
ENST00000481777	ENSG00000143436	MRPL9	0	0.253717	0	0	0	0
ENST00000310826	ENSG00000173276	ZBTB21	0	0.2529	0	0	0	0
ENST00000518336	ENSG00000120963	ZNF706	0.14489	0.252766	0.154796	0.086849	0.217955	0.051342
ENST00000424529	ENSG00000144560	VGLL4	0.056232	0.252418	0.123951	0	0.080751	0.120009
ENST00000371691	ENSG00000165716	DIPK1B	0.075772	0.250956	0.154267	0.188501	0.050445	0.05188
ENST00000367468	ENSG00000073756	PTGS2	0.169001	0.250774	0.010355	0.028033	0.038032	0.089267
ENST00000490576	ENSG00000138061	CYP1B1	0	0.249139	0.039951	0	0	0
ENST00000408959	ENSG00000221883	ARIH2OS	0.008283	0.249124	0.167865	0.090564	0.161228	0.112858
ENST00000540228	ENSG00000111641	NOP2	0.045354	0.248739	0.121857	0.076311	0.107365	0.108508
ENST00000549094	ENSG00000130768	SMPDL3B	0	0.248612	0	0	0	0
ENST00000502323	ENSG00000132463	GRSF1	0	0.248531	0.218282	0.115025	0.047672	0.017809
ENST00000587351	ENSG00000105058	FAM32A	0.034379	0.248286	0.106751	0.095303	0.039252	0.029103
ENST00000558688	ENSG00000086666	ZFAND6	0.035359	0.246593	0.050521	0.034305	0.027819	0.073184
ENST00000225805	ENSG00000108666	C17orf75	0.036164	0.245369	0.129028	0.02692	0.082038	0.031732
ENST00000541050	ENSG00000110880	CORO1C	0.009142	0.244831	0.025051	0.026953	0.033529	0.079037
ENST00000644906	ENSG00000168036	CTNNB1	0	0.244768	0	0	0	0
ENST00000562142	ENSG00000077238	IL4R	0.068899	0.244749	0.05893	0.027503	0.057906	0.081492
ENST00000554397	ENSG00000100600	LGMN	0.060453	0.24451	0.152438	0.103317	0.125357	0.020904
ENST00000396389	ENSG00000196230	TUBB	0.014394	0.243614	0.026088	0.019645	0.052042	0.042767
ENST00000464850	ENSG00000184517	ZFP1	0.144616	0.243326	0	0	0.030461	0.201979
ENST00000561743	ENSG00000103005	USB1	0	0.24322	0.081735	0	0.002624	0.008318
ENST00000594682	ENSG00000167766	ZNF83	0.094647	0.242689	0.06339	0.075203	0.069679	0.064096
ENST00000394933	ENSG00000160606	TLCD1	0.050091	0.242688	0.173375	0.080091	0.053408	0.133268
ENST00000515550	ENSG00000078177	N4BP2	0.180103	0.242642	0.159282	0.109157	0.128227	0.070831
ENST00000228955	ENSG00000111358	GTF2H3	0.038683	0.241931	0.124962	0.068395	0.163157	0.120477
ENST00000614794	ENSG00000005206	SPPL2B	0.024581	0.241867	0.005572	0.077022	0.02436	0.132053
ENST00000534078	ENSG00000149792	MRPL49	0	0.241534	0.163566	0.096865	0	0.097245
ENST00000389574	ENSG00000164828	SUN1	0.164535	0.239771	0.222542	0.17351	0.164998	0.04128
ENST00000420982	ENSG00000011009	LYPLA2	0.185403	0.239316	0.111022	0.132365	0.146949	0.00154
ENST00000630730	ENSG00000133103	COG6	0.093195	0.239047	0.036094	0	0	0
ENST00000432921	ENSG00000100852	ARHGAP5	0.251021	0.238721	0.176515	0.185841	0.087276	0
ENST00000283233	ENSG00000153237	CCDC148	0	0.23859	0	0	0	0.206274
ENST00000650044	ENSG00000099625	CBARP	0.039255	0.238571	0.022426	0.009413	0.005593	0.008638
ENST00000344213	ENSG00000115641	FHL2	0.070969	0.238267	0.019864	0.012431	0	0
ENST00000543265	ENSG00000167985	SDHAF2	0	0.237626	0.216698	0.076064	0.065708	0.098145
ENST00000617859	ENSG00000095574	IKZF5	0	0.237467	0.07573	0.000514	0.005365	0.0025
ENST00000617365	ENSG00000179010	MRFAP1	0.095946	0.236271	0.080745	0.053367	0.209573	0.050843
ENST00000453024	ENSG00000168036	CTNNB1	0.00343	0.235786	0.111315	0.058915	0.06216	0.029874
ENST00000628582	ENSG00000115762	PLEKHB2	0	0.23554	0	0	0	0
ENST00000372597	ENSG00000010803	SCMH1	0.256483	0.235242	0.167486	0.153754	0.147036	0.001956
ENST00000576431	ENSG00000225663	MCRIP1	0.031342	0.235171	0.087887	0.00044	0.164066	0.048345
ENST00000497849	ENSG00000026025	VIM	0.031944	0.235065	0.137508	0.082345	0.094848	0.098939
ENST00000629020	ENSG00000146416	AIG1	0.045879	0.234545	0.00154	0.000714	0.001862	0.001179
ENST00000590253	ENSG00000141349	G6PC3	0.010066	0.234211	0.028592	0.062135	0.003631	0.0298
ENST00000522633	ENSG00000134352	IL6ST	0.134293	0.233964	0.1548	0.014358	0.046084	0.036622
ENST00000447222	ENSG00000127948	POR	0.265809	0.233278	0.202758	0.101201	0.066331	0.004527
ENST00000555039	ENSG00000166165	CKB	0.094622	0.233217	0.191513	0.080704	0.059915	0.055387
ENST00000443023	ENSG00000119042	SATB2	0.058341	0.232522	0.081786	0.017529	0.054276	0.084166
ENST00000347215	ENSG00000124225	PMEPA1	0.016401	0.232067	0.002502	0.000805	0.054265	0.092883
ENST00000640765	ENSG00000104447	TRPS1	0.002023	0.230395	0.09419	0.003838	0.003913	0.042539
ENST00000437518	ENSG00000143486	EIF2D	0	0.230004	0	0	0	0
ENST00000539433	ENSG00000161714	PLCD3	0.250349	0.229927	0.114388	0	0.255516	0
ENST00000537427	ENSG00000006757	PNPLA4	0	0.229565	0	0	0	0
ENST00000373510	ENSG00000160062	ZBTB8A	0.162621	0.229067	0.191733	0.081999	0.069953	0.174575
ENST00000526811	ENSG00000142089	IFITM3	0	0.228672	0	0	0.006377	0.006397
ENST00000503251	ENSG00000171566	PLRG1	0.109568	0.228648	0.029326	0.14029	0.002114	0.073333
ENST00000409908	ENSG00000014641	MDH1	0.135403	0.228615	0	0.244958	0	0
ENST00000512163	ENSG00000113328	CCNG1	0	0.22813	0.070323	0.181977	0	0.093527
ENST00000457392	ENSG00000143418	CERS2	0.083408	0.226836	0.16668	0.146896	0.104228	0.06757
ENST00000532674	ENSG00000165526	RPUSD4	0.08393	0.226351	0.191444	0.093201	0.064278	0.111151
ENST00000549181	ENSG00000089060	SLC8B1	0.120656	0.226276	0.098805	0.038496	0.166503	0.025503
ENST00000454580	ENSG00000167642	SPINT2	0	0.225987	0	0	0	0
ENST00000645370	ENSG00000136104	RNASEH2B	0	0.225952	0.131139	0.167334	0.127631	0
ENST00000572990	ENSG00000168411	RFWD3	0.107429	0.225907	0.151734	0.14226	0.068413	0.119773
ENST00000643785	ENSG00000186073	C15orf41	0.093657	0.225726	0.074641	0.094836	0.08519	0.091384
ENST00000577541	ENSG00000131747	TOP2A	0.083052	0.225707	0.055673	0.124498	0.024152	0.121824
ENST00000392662	ENSG00000136518	ACTL6A	0.006647	0.22441	0.006937	0.011883	0.01606	0.038327
ENST00000397638	ENSG00000160310	PRMT2	0.046757	0.224287	0.021719	0.026759	0.006674	0.106614
ENST00000507210	ENSG00000109180	OCIAD1	0	0.223644	0.066326	0.031201	0.224436	0.041556
ENST00000307366	ENSG00000168569	TMEM223	0.148584	0.223557	0.072634	0.056399	0.083734	0.056647
ENST00000431125	ENSG00000197114	ZGPAT	0.111519	0.223391	0.200793	0.245067	0	0
ENST00000422595	ENSG00000143390	RFX5	0.007636	0.222847	0.127735	0.027332	0.045585	0.101693
ENST00000519053	ENSG00000164941	INTS8	0.001545	0.222812	0.008148	0.002251	0.004504	0.152263
ENST00000441822	ENSG00000071462	BUD23	0	0.222727	0.017462	0	0	0.017714
ENST00000430324	ENSG00000171462	DLK2	0	0.222161	0.143259	0	0.316049	0.036982
ENST00000553201	ENSG00000254852	NPIPA2	0.168397	0.222005	0	0	0.169998	0
ENST00000525005	ENSG00000166452	AKIP1	0.092446	0.22197	0.023021	0.038698	0.110756	0.027987
ENST00000326474	ENSG00000180044	C3orf80	0.170661	0.221401	0.12693	0.037256	0.1173	0.021702
ENST00000483239	ENSG00000149292	TTC12	0.139688	0.220418	0	0.01483	0.197661	0
ENST00000537674	ENSG00000008838	MED24	0.064679	0.220137	0.043658	0.051973	0.150794	0.054577
ENST00000557742	ENSG00000140563	MCTP2	0.150115	0.219973	0.188042	0.14493	0.073257	0.063009
ENST00000625289	ENSG00000196497	IPO4	0.052812	0.218953	0.079983	0	0	0.22786
ENST00000546697	ENSG00000084112	SSH1	0.098946	0.218855	0.127244	0.045749	0.046216	0.076702
ENST00000464029	ENSG00000008282	SYPL1	0.121299	0.218734	0.167517	0.032904	0.16933	0.141526
ENST00000497775	ENSG00000286105	AL353579.1	0	0.218366	0	0	0	0
ENST00000546826	ENSG00000170421	KRT8	0.028988	0.217753	0.164322	0.125527	0.056388	0.144577
ENST00000397581	ENSG00000147862	NFIB	0.025901	0.217134	0.002709	0.014423	0.010076	0.015198
ENST00000564567	ENSG00000103196	CRISPLD2	0.00065	0.216954	0.000258	0.06831	0.000382	0.093616
ENST00000534345	ENSG00000127054	INTS11	0.000261	0.216557	0.188988	0.195738	0.115518	0.051042
ENST00000592490	ENSG00000196437	ZNF569	0	0.21651	0	0	0	0.229999
ENST00000642707	ENSG00000127990	SGCE	0	0.216378	0	0.035117	0	0.169404
ENST00000374000	ENSG00000025293	PHF20	0.048184	0.215917	0.110923	0.110206	0.087301	0.068673
ENST00000440513	ENSG00000185024	BRF1	0.022976	0.215482	0.003254	0	0.010952	0.054545
ENST00000550236	ENSG00000204842	ATXN2	0	0.214501	0.061861	0.11756	0.104397	0.044016
ENST00000414963	ENSG00000115524	SF3B1	0.144772	0.214373	0.178842	0	0.286095	0
ENST00000597639	ENSG00000105204	DYRK1B	0	0.213731	0	0	0	0
ENST00000535286	ENSG00000083544	TDRD3	0.072357	0.21348	0.124221	0.108039	0.074712	0.100521
ENST00000577571	ENSG00000266094	RASSF5	0.232046	0.213473	0.148555	0.071819	0.030005	0.069529
ENST00000358993	ENSG00000198573	SPANXC	0.061012	0.213316	0.068376	0	0.085953	0.148692
ENST00000522361	ENSG00000153310	FAM49B	0	0.213232	0.136856	0.154804	0	0.146164
ENST00000366783	ENSG00000143801	PSEN2	0.17726	0.212772	0.036161	0.04495	0.002029	0.169693
ENST00000568411	ENSG00000103495	MAZ	0	0.212285	0.097895	0	0	0.147724
ENST00000502326	ENSG00000134352	IL6ST	0.088587	0.212045	0.041199	0.019882	0.040258	0.040736
ENST00000556645	ENSG00000140105	WARS	0.000449	0.211931	0.159308	0.224433	7.6e-05	0.002255
ENST00000497789	ENSG00000134363	FST	0.044391	0.211591	0.155945	0.04698	0.071967	0.043248
ENST00000523027	ENSG00000092964	DPYSL2	0.00148	0.211563	0.110635	0.0058	0.335967	0.003732
ENST00000588347	ENSG00000130733	YIPF2	0.000908	0.211534	0.100865	0.064933	0.05194	0.081375
ENST00000462425	ENSG00000144857	BOC	0.082548	0.211343	0.178032	0.174145	0.065047	0.012076
ENST00000581747	ENSG00000108666	C17orf75	0.079728	0.211285	0.201831	0.056436	0.115984	0.068919
ENST00000415724	ENSG00000180776	ZDHHC20	0.032661	0.211262	0.078786	0.050652	0.097663	0.107191
ENST00000326317	ENSG00000181523	SGSH	0.162366	0.211004	0.115781	0.008943	0.016712	0.00384
ENST00000552903	ENSG00000065357	DGKA	0.135864	0.210286	0.097766	0.068519	0	0.067605
ENST00000396894	ENSG00000068438	FTSJ1	0.047036	0.210221	0.057319	0.018248	0.065123	0.057064
ENST00000476320	ENSG00000186577	SMIM29	0.06087	0.209626	0.191983	0.092841	0.059774	0.087556
ENST00000590296	ENSG00000161914	ZNF653	0.033045	0.209131	0.038898	0	0	0.232752
ENST00000361332	ENSG00000198561	CTNND1	0	0.208021	0	0.035192	0	0.014752
ENST00000610283	ENSG00000205683	DPF3	0.009017	0.207905	0.001973	0.010866	0.007932	0.009604
ENST00000525474	ENSG00000134802	SLC43A3	0.001376	0.207807	0	0	0	0
ENST00000372927	ENSG00000102384	CENPI	0	0.207248	0	0	0.031377	0
ENST00000544894	ENSG00000167186	COQ7	0	0.206529	0	0	0	0.199414
ENST00000436503	ENSG00000163702	IL17RC	0	0.206474	0	0.071309	0.008877	0.062432
ENST00000518255	ENSG00000175806	MSRA	0	0.2056	0	0.011895	0	0
ENST00000495642	ENSG00000174173	TRMT10C	0.00691	0.205163	0.010899	0.042242	0.009653	0.01368
ENST00000354513	ENSG00000197461	PDGFA	0.004245	0.204025	0	0.002608	0.013152	0.001291
ENST00000551317	ENSG00000203666	EFCAB2	0.190273	0.204017	0.090054	0.038523	0.056061	0.03722
ENST00000588671	ENSG00000115257	PCSK4	0	0.203746	0	0.015393	0.048107	0.001685
ENST00000378511	ENSG00000138078	PREPL	0	0.203538	0.125245	0	0	0
ENST00000555930	ENSG00000100575	TIMM9	0.133312	0.203094	0.095843	0	0.049271	0.103794
ENST00000554910	ENSG00000100462	PRMT5	0	0.202864	0.006647	0.005804	0.057666	0
ENST00000530023	ENSG00000148950	IMMP1L	0.000285	0.202617	0.009899	0.011598	0.003297	0
ENST00000392490	ENSG00000135549	PKIB	0.019772	0.202612	0.084745	0.092252	0.01582	0.087603
ENST00000240100	ENSG00000120875	DUSP4	0.111812	0.202414	0.074628	0.037652	0.04711	0.043596
ENST00000409312	ENSG00000124641	MED20	0	0.20236	0.183193	0	0	0
ENST00000649492	ENSG00000183826	BTBD9	0.00581	0.2014	0.156985	0.122052	0.116186	0.010803
ENST00000621814	ENSG00000115355	CCDC88A	0	0.201196	0.125536	0.03887	0.135501	0.014444
ENST00000428555	ENSG00000204599	TRIM39	0.124239	0.200908	0.170276	0.094434	0.044292	0.122043
ENST00000645620	ENSG00000166340	TPP1	0.003812	0.200556	0.122176	0.001	0	0.269702
ENST00000389022	ENSG00000205309	NT5M	0	0.20016	0.164469	0.022861	0	0
ENST00000314399	ENSG00000177692	DNAJC28	0.044963	0.200129	0.126365	0	0.065013	0.000243
ENST00000517672	ENSG00000153310	FAM49B	0	0.199577	0	0	0.04327	0
TCONS_00361290	ENSG00000002745	WNT16	0.010476	0.198866	0.098614	0.066388	0.029508	0
ENST00000413368	ENSG00000164850	GPER1	0.15243	0.198601	0	0.122026	0	0
ENST00000579684	ENSG00000169696	ASPSCR1	0	0.198578	0.084433	0	0	0.21394
ENST00000526887	ENSG00000187954	CYHR1	0.113311	0.198534	0.177039	0.124808	0	0.082696
ENST00000532449	ENSG00000149554	CHEK1	0	0.19812	0	0	0	0
ENST00000361675	ENSG00000122786	CALD1	0.040097	0.19793	0.027729	0.045941	0.156636	0.017929
ENST00000332968	ENSG00000215472	RPL17-C18orf32	0.004987	0.197624	0.003933	0.00841	0.006829	0.005153
ENST00000368322	ENSG00000143622	RIT1	0.007686	0.197578	0	0.006109	0	0.213581
ENST00000572255	ENSG00000189067	LITAF	0.076592	0.197569	0.051635	0.123051	0	0.046815
ENST00000557501	ENSG00000063761	ADCK1	0.100009	0.197326	0	0	0	0
ENST00000362010	ENSG00000197415	VEPH1	0	0.197245	0.096875	0	0.042761	0.067062
ENST00000263339	ENSG00000115008	IL1A	0.08057	0.196979	0.052253	0.048562	0.065756	0.08825
ENST00000410052	ENSG00000003393	ALS2	0.061104	0.196639	0.168145	0.101361	0.053652	0.150689
ENST00000514682	ENSG00000145425	RPS3A	0	0.196261	0	0	0	0
ENST00000381732	ENSG00000120158	RCL1	0.052128	0.196235	0.035613	0.049527	1e-06	0.161612
ENST00000636107	ENSG00000096093	EFHC1	0.008898	0.195927	0.004841	0.06635	0	0.121635
ENST00000520492	ENSG00000169946	ZFPM2	0.008344	0.195322	0	0	0.007574	0.004605
ENST00000647425	ENSG00000157540	DYRK1A	0.049278	0.193977	0.107312	0.01818	0.049725	0.061209
ENST00000418289	ENSG00000118246	FASTKD2	0.04289	0.192884	0.137252	0	0	0
ENST00000281146	ENSG00000151470	C4orf33	0.06753	0.192688	0.101613	0.098652	0.086042	0.085242
ENST00000617202	ENSG00000148334	PTGES2	0.083074	0.192527	0.153246	0.05729	0.072135	0.03409
ENST00000439288	ENSG00000112394	SLC16A10	0.133754	0.19217	0.040078	0	0.041177	0.042844
ENST00000554477	ENSG00000213983	AP1G2	0.062117	0.191892	0.117489	0.043915	0.108495	0.115851
ENST00000602179	ENSG00000159871	LYPD5	0	0.191724	0	0	0	0.058436
ENST00000472383	ENSG00000168827	GFM1	0	0.19089	0.158604	0.065163	0	0.066356
ENST00000572525	ENSG00000176108	CHMP6	0	0.190805	0	0	0.005709	0
ENST00000602766	ENSG00000154102	C16orf74	0	0.190712	0.140225	0.068186	0.086522	0.003692
ENST00000451155	ENSG00000146282	RARS2	0.157829	0.190606	0.033042	0.101549	0.026088	0.018867
ENST00000420111	ENSG00000184371	CSF1	0.067845	0.190456	0.077593	0	0.05491	0.105687
ENST00000372522	ENSG00000177868	SVBP	0.063468	0.190302	0.026396	0.045847	0.095088	0.066052
ENST00000457573	ENSG00000164081	TEX264	0.227538	0.189817	0.126784	0.015631	0.071046	0.118777
ENST00000557519	ENSG00000213741	RPS29	0.088636	0.189645	0.10553	0.118376	0	0
ENST00000573791	ENSG00000171490	RSL1D1	0	0.189563	0.055332	0	0.025581	0
ENST00000640349	ENSG00000121897	LIAS	0	0.189191	0.004499	0	0	0
ENST00000399036	ENSG00000121797	CCRL2	0.096777	0.189146	0.127056	0.077399	0.064782	0.082148
ENST00000322191	ENSG00000152782	PANK1	0	0.188799	0	0	0.011094	0
ENST00000589280	ENSG00000142065	ZFP14	0.042016	0.188645	0.064836	0.023763	0.101148	0.114429
ENST00000538310	ENSG00000087494	PTHLH	0.046045	0.188562	0.062381	0.069423	0.047045	0.026382
ENST00000474203	ENSG00000005483	KMT2E	0.152173	0.187939	0.099158	0.231448	0	0
ENST00000546653	ENSG00000111424	VDR	0.112256	0.18773	0.060828	0	0	0
ENST00000547698	ENSG00000139636	LMBR1L	0	0.187588	0.098736	0.107966	0	0.046965
ENST00000556314	ENSG00000198604	BAZ1A	0.03761	0.187408	0.091822	0.042726	0.080689	0.051662
ENST00000367814	ENSG00000118513	MYB	0.0133	0.187375	0.143628	0.050198	0.096949	0.042619
ENST00000591337	ENSG00000160953	PWWP3A	0.008741	0.187292	0.00011	0.006378	0.018766	0.009308
ENST00000395569	ENSG00000110492	MDK	0.016022	0.186955	0.140454	0.093479	0.0161	0
ENST00000347609	ENSG00000105699	LSR	0	0.186336	0	0	0	0
ENST00000526752	ENSG00000185803	SLC52A2	0	0.185971	0.057819	0.048806	0.127539	0
ENST00000513170	ENSG00000186792	HYAL3	0.089445	0.185104	0.062836	0.067926	0.054486	0.066536
ENST00000476743	ENSG00000005302	MSL3	0	0.185026	0	0	0	0
ENST00000251993	ENSG00000100364	KIAA0930	0.091148	0.184515	0.096939	0.072148	0.095877	0.084866
ENST00000511601	ENSG00000137460	FHDC1	0.005421	0.184489	0.062625	0.06925	0.120373	0.005675
ENST00000528419	ENSG00000172543	CTSW	0	0.184358	0.169553	0.152653	0.137762	0.046899
ENST00000434067	ENSG00000113389	NPR3	0.131411	0.184317	0.144913	0.030391	0.148632	0.061559
ENST00000336067	ENSG00000160404	TOR2A	0.194752	0.183976	0.150913	0.003983	0.155418	0.105439
ENST00000622959	ENSG00000127419	TMEM175	0	0.183969	0	0.093182	0	0.076551
ENST00000356917	ENSG00000095794	CREM	0.102822	0.183935	0.158077	0.083524	0.036355	0.070596
ENST00000374140	ENSG00000138835	RGS3	0	0.183844	0.003271	0.060361	0	0
ENST00000540114	ENSG00000110841	PPFIBP1	0	0.183302	0	0	0	0
ENST00000473221	ENSG00000137074	APTX	0.03747	0.18323	0.059132	0.067321	0.064921	0.068852
ENST00000371473	ENSG00000165802	NSMF	0.19305	0.182686	0.122782	0.082053	0.073333	0.086118
ENST00000585941	ENSG00000005156	LIG3	0	0.18265	0	0	0	0
ENST00000598555	ENSG00000090554	FLT3LG	0.059181	0.182636	0.095596	0.169575	0.063482	0
ENST00000308302	ENSG00000174567	GOLT1A	0.103066	0.182241	0.078802	0.049607	0.049078	0.093869
ENST00000543394	ENSG00000102755	FLT1	0	0.182195	0.001444	0.012745	0.014764	0
ENST00000566980	ENSG00000166822	TMEM170A	0.159182	0.18205	0.160558	0.050675	0.069561	0.091587
ENST00000394691	ENSG00000126822	PLEKHG3	0	0.181988	0	0	0	0
ENST00000518388	ENSG00000104205	SGK3	0.107899	0.180361	0	0.086321	0.108844	0.009028
TCONS_00000628	XLOC_000449	XLOC_000449	0	0.180352	0	0	0	0
ENST00000617470	ENSG00000073578	SDHA	0	0.180265	0	0.023586	0	0
ENST00000448007	ENSG00000144401	METTL21A	0.008603	0.180232	0.15757	0.156433	0.005951	0.034279
ENST00000309395	ENSG00000173542	MOB1B	0.002152	0.180135	0.11023	0.034498	9.4e-05	0.000397
ENST00000437550	ENSG00000126264	HCST	0.030211	0.179878	0.012401	0.024394	0.02141	0.018241
ENST00000536680	ENSG00000121988	ZRANB3	0.012043	0.17974	0.015025	0.013663	0.018743	0.018416
ENST00000526170	ENSG00000177042	TMEM80	0.064603	0.178768	0.053949	0.032738	0.020044	0.037771
ENST00000550937	ENSG00000166225	FRS2	0	0.178347	0.138949	0	0	0
ENST00000443681	ENSG00000164088	PPM1M	0.11426	0.178117	0.125198	0.030725	0.034346	0.084019
ENST00000356311	ENSG00000165698	SPACA9	0.010543	0.177677	0.00547	0.007346	0.00597	0.113506
ENST00000589446	ENSG00000085415	SEH1L	0	0.176827	0.146944	0	0	0
ENST00000380298	ENSG00000137266	SLC22A23	0.106503	0.176728	0.15939	0.118435	0.111691	0.045268
ENST00000517628	ENSG00000123643	SLC36A1	0.117098	0.176648	0.007104	0.03015	0.011493	0.111804
ENST00000316724	ENSG00000136717	BIN1	0.035069	0.176097	0.131908	0	0.163513	0
ENST00000472642	ENSG00000106615	RHEB	0.031345	0.17604	0.123067	0.152775	0.002332	0.083227
ENST00000314915	ENSG00000176697	BDNF	0.074155	0.17598	0.093515	0.004819	0.007237	0.00787
ENST00000238181	ENSG00000116977	LGALS8	0.071204	0.175123	0	0	0	0.079641
ENST00000625990	ENSG00000173575	CHD2	0	0.17499	0.149604	0	0	0.130725
ENST00000485734	ENSG00000157800	SLC37A3	0	0.174483	0	0.004731	0	0.152873
ENST00000638160	ENSG00000203668	CHML	0.113502	0.174044	0.050472	0.057699	0	0.070605
ENST00000576976	ENSG00000127804	METTL16	0.084633	0.17373	0	0	0	0.175642
ENST00000638018	ENSG00000203668	CHML	0.113356	0.173717	0.050307	0.058006	0	0.070357
ENST00000562785	ENSG00000177200	CHD9	0.143907	0.173505	0.027973	0.087077	0.037109	0.028725
ENST00000511751	ENSG00000129055	ANAPC13	0.076368	0.17318	0.081494	0.119731	0.007463	0.080078
ENST00000443351	ENSG00000135720	DYNC1LI2	0.056108	0.173151	0.098618	0	0.066657	0.099501
ENST00000394109	ENSG00000139531	SUOX	0.039658	0.172842	0.048472	0.026576	0.049512	0.035713
ENST00000546619	ENSG00000012822	CALCOCO1	0.114092	0.172552	0.063453	0.08495	0	0.080159
ENST00000441081	ENSG00000114745	GORASP1	0	0.172487	0.135718	0	0.273935	0
ENST00000495557	ENSG00000168297	PXK	0.124529	0.172215	0.076737	0.054439	0.057406	0.034561
ENST00000378241	ENSG00000152457	DCLRE1C	0.065218	0.171625	0.074022	0.118415	0.026228	0.03717
ENST00000580666	ENSG00000108932	SLC16A6	0	0.171464	0.078107	0	0.150893	5.2e-05
ENST00000374746	ENSG00000108094	CUL2	0.044069	0.170782	0.041229	0	0.063643	0.033755
ENST00000563649	ENSG00000103544	VPS35L	0	0.170339	0.00015	0	0	0
ENST00000397814	ENSG00000168487	BMP1	0.026135	0.170316	0.099655	0.060158	0.061445	0.1004
ENST00000539637	ENSG00000115170	ACVR1	0.107748	0.170087	0.065653	0	0	0.159737
ENST00000424284	ENSG00000267060	PTGES3L	6.6e-05	0.169956	0	0.100162	0	0.091414
ENST00000513774	ENSG00000118816	CCNI	0.044719	0.169076	0.017569	0.020227	0.025579	0.035961
ENST00000651978	ENSG00000114423	CBLB	0.001472	0.168804	0	0	0.003621	0
ENST00000518791	ENSG00000170379	TCAF2	0.101836	0.168518	0.020291	0	0	0.002037
ENST00000527809	ENSG00000117152	RGS4	0	0.168344	0	0	0	0
ENST00000508983	ENSG00000173210	ABLIM3	0	0.167113	0	0	0	0
ENST00000471387	ENSG00000174851	YIF1A	0.126927	0.166564	0.148977	0.035725	0.126358	0.082506
ENST00000371438	ENSG00000124813	RUNX2	0.074773	0.166344	0	0	0	0
ENST00000446860	ENSG00000068745	IP6K2	0.010585	0.166207	0.023713	0.026175	0.027191	0.090778
ENST00000394015	ENSG00000213417	KRTAP2-4	0.014439	0.165641	0.110122	0.024601	0.028889	0.008364
ENST00000651669	ENSG00000177954	RPS27	0.085196	0.165595	0.155998	0.112469	0.034979	0.114756
ENST00000394339	ENSG00000164056	SPRY1	0	0.165482	0.07953	0.128018	0.005783	0.009389
ENST00000596517	ENSG00000269858	EGLN2	0	0.165399	0	0	0	0
ENST00000508824	ENSG00000145147	SLIT2	0.079162	0.164873	0.020635	0.041496	0.00477	0.019108
ENST00000538135	ENSG00000166532	RIMKLB	0	0.164513	0	0	0	0
ENST00000528410	ENSG00000005801	ZNF195	0.081606	0.164383	0	0	0	0.077612
ENST00000379155	ENSG00000164978	NUDT2	0	0.164375	0	0	0	0
ENST00000306256	ENSG00000157916	RER1	0.085316	0.163638	0.024006	0.070719	0.02462	0
ENST00000418394	ENSG00000160299	PCNT	0.184664	0.163466	0.13684	0	0.092389	0.076948
ENST00000522603	ENSG00000198363	ASPH	0	0.163399	0	0	0	0
ENST00000253796	ENSG00000131477	RAMP2	0.195956	0.16337	0.132106	0.103925	0	0.048381
ENST00000426540	ENSG00000196345	ZKSCAN7	0.009258	0.163	0.018755	0.01242	0.0258	0.04243
ENST00000588401	ENSG00000088256	GNA11	0.112503	0.162748	0	0.066032	0	0.035708
ENST00000376714	ENSG00000102595	UGGT2	0.009059	0.162701	0.158784	0.177053	0.098238	0
ENST00000340600	ENSG00000120833	SOCS2	1.2e-05	0.16259	0.015584	0	0.004089	0.086284
ENST00000436609	ENSG00000101901	ALG13	0.005482	0.161745	0.018313	0.032994	0	0.017836
ENST00000565409	ENSG00000104164	BLOC1S6	0.033493	0.161291	0.060888	0.065099	0.052214	0.109223
ENST00000521451	ENSG00000040341	STAU2	0.000644	0.160747	0.005001	0	0.00228	0
ENST00000561840	ENSG00000167515	TRAPPC2L	0.206865	0.160331	0.155978	0.224838	0	0
ENST00000323249	ENSG00000131188	PRR7	0.137487	0.160215	0.096878	0.13342	0.07624	0
ENST00000296525	ENSG00000164122	ASB5	0.041316	0.159996	0.122289	0.073891	0.008655	0.006487
ENST00000437654	ENSG00000125347	IRF1	0	0.159944	0.089836	0.055886	0.048451	0.049454
ENST00000374870	ENSG00000131089	ARHGEF9	0	0.15945	0	0	0	0.127309
ENST00000547242	ENSG00000151135	TMEM263	0.056734	0.159312	0.051582	0.062588	0.06736	0.025868
ENST00000558455	ENSG00000138594	TMOD3	0.157672	0.159244	0.079315	0.049311	0.044521	0.027608
ENST00000396535	ENSG00000185634	SHC4	0	0.159156	0.015297	0	0	0
ENST00000505846	ENSG00000145293	ENOPH1	0.048051	0.159154	0.051508	0.01646	0.000685	0.000237
ENST00000342216	ENSG00000123143	PKN1	0.001348	0.159144	0.000959	0.003107	0	0
ENST00000338895	ENSG00000169598	DFFB	0.002548	0.158953	0.002474	0.005524	0	0.074393
ENST00000513024	ENSG00000064042	LIMCH1	0	0.158922	0	0	0	0
ENST00000428929	ENSG00000143919	CAMKMT	0.038631	0.158876	0.067338	0.088395	0.022331	0.059135
ENST00000368388	ENSG00000111907	TPD52L1	0.002603	0.158671	0.05529	0.04515	0.00096	0.068515
ENST00000372514	ENSG00000164010	ERMAP	0.107734	0.158509	0.000595	0.000265	0.000362	0.117108
ENST00000504687	ENSG00000160789	LMNA	0	0.158348	0.102483	0.091871	0.074894	0.076799
ENST00000529956	ENSG00000243710	CFAP57	0	0.158106	0.14865	0.121313	0	0.032922
ENST00000506198	ENSG00000134851	TMEM165	0	0.15802	0.100021	0	0.108695	0
ENST00000398117	ENSG00000171791	BCL2	0.098166	0.157997	0.139158	0.055353	0.069511	0.105141
ENST00000528728	ENSG00000149201	CCDC81	0	0.157253	0.063954	0	0	0
ENST00000529552	ENSG00000077782	FGFR1	0.183925	0.156703	0.150296	0	0.113526	0.098492
ENST00000493089	ENSG00000114861	FOXP1	0.052751	0.15644	0.147583	0.046436	0.127951	0.059759
ENST00000565365	ENSG00000261587	TMEM249	0.07004	0.15643	0.028036	0.060777	0.06936	0.035546
ENST00000395862	ENSG00000155097	ATP6V1C1	0.04708	0.156382	0.102834	0.049803	0.036274	0.047441
ENST00000648219	ENSG00000008513	ST3GAL1	0.086071	0.156117	0.015153	0.009448	0	0.002586
ENST00000253778	ENSG00000131459	GFPT2	0.115082	0.155351	0.092515	0.047803	0.032846	0.050406
ENST00000568477	ENSG00000140931	CMTM3	0.030453	0.154883	0.029265	0.098389	0.041956	0.044721
ENST00000433022	ENSG00000136143	SUCLA2	0.031602	0.154854	0.134955	0.036174	0	0
ENST00000496660	ENSG00000166839	ANKDD1A	0.008512	0.154744	0	0	0.011529	0.006379
ENST00000644110	ENSG00000122512	PMS2	0	0.154393	0.068428	0.102565	0.107116	0
ENST00000563522	ENSG00000179889	PDXDC1	0.082545	0.15427	0.009653	0	0	0.020592
ENST00000565225	ENSG00000225973	PIGBOS1	0.072595	0.154153	0.052742	0.037016	0.132904	0.032905
ENST00000558087	ENSG00000086666	ZFAND6	0	0.153601	0	0.007202	0.012988	0
ENST00000652382	ENSG00000110931	CAMKK2	0.001541	0.152983	0.101669	0.00098	0	0.002773
ENST00000336655	ENSG00000172738	TMEM217	0	0.152588	0	0	0	0
ENST00000536161	ENSG00000185504	FAAP100	0.05733	0.152527	0.08977	0.074932	0.041218	0.092384
ENST00000514052	ENSG00000170464	DNAJC18	0.151436	0.152424	0.130461	0.061025	0.090885	0.055417
ENST00000417540	ENSG00000115677	HDLBP	0.102059	0.152379	0.017013	0.029157	0.065459	0
ENST00000592798	ENSG00000105011	ASF1B	0.037051	0.151837	0.124694	0	0.092706	0.065114
ENST00000568592	ENSG00000260916	CCPG1	0.097796	0.151711	0.116854	0.055378	0.067954	0
ENST00000405576	ENSG00000025434	NR1H3	0	0.151409	0.110747	0.122471	0	0
ENST00000337959	ENSG00000100266	PACSIN2	0.000414	0.151247	0.000196	0.000168	0	0.000127
ENST00000374116	ENSG00000137309	HMGA1	0.113966	0.150547	0.101974	0.094294	0.067678	0.055913
ENST00000273541	ENSG00000240682	ISY1	0	0.150168	0.092874	0.097903	0	0.008644
ENST00000260385	ENSG00000137824	RMDN3	0.017547	0.150074	0.009296	8.6e-05	0.013443	0.012653
ENST00000480744	ENSG00000256977	LIMS3	0	0.150029	0	0	0	0
TCONS_00179307	XLOC_068731	XLOC_068731	0	0.149604	0.078898	0	0	0.059114
ENST00000615972	ENSG00000180185	FAHD1	0.043921	0.149279	0.039868	0.00231	0.13316	0.00295
ENST00000372429	ENSG00000136878	USP20	0.034111	0.149248	0.056193	0.028088	0.022628	0.080306
ENST00000563171	ENSG00000260916	CCPG1	0.070213	0.149134	0.026828	0.000618	0.04727	0.063894
ENST00000424647	ENSG00000100034	PPM1F	0	0.149048	0.12822	0.088205	0.093205	0.084605
ENST00000435827	ENSG00000090273	NUDC	0	0.148634	0.010922	0	0.008978	0.080118
ENST00000419020	ENSG00000198563	DDX39B	0.043708	0.148605	0.053873	0.075546	0.077551	0.058711
ENST00000397995	ENSG00000258818	RNASE4	0	0.148556	0	0	0	0
ENST00000355995	ENSG00000148737	TCF7L2	0	0.148548	0	0.003914	0	0
ENST00000507390	ENSG00000181904	C5orf24	0.016449	0.147845	0	0	0	0
ENST00000481632	ENSG00000181722	ZBTB20	0.079131	0.147652	0.077017	0.082043	0.008099	0.006987
ENST00000646590	ENSG00000133835	HSD17B4	0.031237	0.147338	0.11681	0.011688	0.140372	0
ENST00000612797	ENSG00000187672	ERC2	0	0.146844	0	0	0	0.004941
ENST00000496603	ENSG00000134330	IAH1	0	0.146284	0	0	0	0
ENST00000571409	ENSG00000175826	CTDNEP1	0	0.145952	0	0	0	0
ENST00000527250	ENSG00000060749	QSER1	0.074503	0.145429	0	0	0	0
ENST00000372441	ENSG00000204052	LRRC73	0.004885	0.144841	0.006291	0	0.021476	0
ENST00000615041	ENSG00000153310	FAM49B	0.096244	0.14476	0.046984	0.064316	0.091861	0.028722
ENST00000538333	ENSG00000106683	LIMK1	0.058694	0.144694	0.112372	0.084152	0.067221	0.048682
ENST00000612624	ENSG00000273590	SMIM11B	0	0.144496	0	0	6.7e-05	0
ENST00000350527	ENSG00000174938	SEZ6L2	0	0.144313	0	0	0	0
ENST00000413947	ENSG00000161513	FDXR	0	0.144167	0.08347	0	0.209893	0
ENST00000405853	ENSG00000025434	NR1H3	0	0.143966	0.120957	0.110746	0	0
ENST00000555076	ENSG00000170633	RNF34	0	0.143831	0	0	0.074113	0.076257
ENST00000535814	ENSG00000136891	TEX10	0.119724	0.143573	0.057683	0.026102	0.051685	0.048768
ENST00000624934	ENSG00000274276	CBSL	0	0.142905	0	0	0	0
ENST00000346736	ENSG00000132016	C19orf57	0.01609	0.142848	0	0	0	0
ENST00000552242	ENSG00000135390	ATP5MC2	0	0.142655	0	0.005363	0	0
ENST00000342483	ENSG00000196152	ZNF79	0.050986	0.142264	0.100155	0	0.054472	0.079234
ENST00000393272	ENSG00000144061	NPHP1	0	0.142188	0	0	0	0.118027
ENST00000530245	ENSG00000133112	TPT1	0.079726	0.14154	0.113578	0.065324	0.015463	0.039802
ENST00000411765	ENSG00000144504	ANKMY1	0.073327	0.141497	0.062987	0.122876	0.066451	0
ENST00000546851	ENSG00000120820	GLT8D2	0.002663	0.141496	0.087744	0.006469	0.067515	0.042356
ENST00000461153	ENSG00000135976	ANKRD36	0.096742	0.141495	0.036184	0.004959	0.008458	0.096605
ENST00000610747	ENSG00000277258	PCGF2	0.082521	0.140854	0.117599	0.03804	0	0.092573
ENST00000443718	ENSG00000183668	PSG9	0	0.140746	0.071581	0	0.147091	0
ENST00000524771	ENSG00000126457	PRMT1	0	0.140335	0.122588	0.042706	0.007363	0
ENST00000391419	ENSG00000212725	KRTAP2-1	0.012963	0.139477	0.07297	0.027734	0.016212	0.008868
ENST00000618728	ENSG00000118513	MYB	0	0.138674	0	0	0.012674	0
ENST00000350499	ENSG00000165698	SPACA9	0	0.138434	0	0	0	0.130898
ENST00000257100	ENSG00000134668	SPOCD1	0	0.13833	0	0	0.031428	0
ENST00000601167	ENSG00000267631	CGB1	0.060731	0.138158	0	0.006098	0	0
ENST00000444214	ENSG00000134285	FKBP11	0.039936	0.138041	0.0751	0.032813	0.065989	0.015713
ENST00000355803	ENSG00000103275	UBE2I	0.074327	0.137961	0.034021	0.045195	0.091643	0.036232
ENST00000601436	ENSG00000105393	BABAM1	0.054154	0.137677	0.101361	0.02688	0.089763	0.097485
ENST00000553371	ENSG00000100600	LGMN	0.053983	0.137671	0.110134	0.004492	0	0
ENST00000651490	ENSG00000025708	TYMP	0	0.137622	0	0	0	0
ENST00000556563	ENSG00000100814	CCNB1IP1	0.040296	0.137361	0.034723	0.077043	0.035189	0.015507
ENST00000246139	ENSG00000125931	CITED1	0.040894	0.136556	0.108427	0.069767	0.03727	0.047891
ENST00000487361	ENSG00000128596	CCDC136	0	0.136341	0	0	0	0
ENST00000430252	ENSG00000111817	DSE	0	0.13634	0	0.082538	0	0.070799
ENST00000535502	ENSG00000168876	ANKRD49	0	0.135582	0.088025	0	0.059366	0.080246
ENST00000570650	ENSG00000141252	VPS53	0.006701	0.134885	0.005236	0.012421	0.00451	0.0169
ENST00000415751	ENSG00000189320	FAM180A	0.078867	0.13446	0.055508	0	0.050997	0
ENST00000260743	ENSG00000138172	CALHM2	0.084566	0.134256	0.12286	0.01786	0.040756	0.053107
ENST00000536340	ENSG00000101040	ZMYND8	0.001382	0.134213	0.001462	0.001547	0.000818	0.001508
ENST00000519410	ENSG00000104325	DECR1	0	0.134082	0	0	0	0
ENST00000602320	ENSG00000102977	ACD	0.041314	0.13379	0.051102	0.067305	0	0
ENST00000530043	ENSG00000197798	FAM118B	0.031396	0.133589	0.039067	0.008547	0	0.055338
ENST00000419612	ENSG00000197183	NOL4L	0.009543	0.133429	0.074017	0.050572	0.072873	0.084616
ENST00000369000	ENSG00000138162	TACC2	0.001052	0.133182	0	0	0	0.069957
ENST00000582475	ENSG00000167088	SNRPD1	0	0.133094	0.018664	0	0.196583	0
ENST00000296871	ENSG00000164400	CSF2	0	0.133013	0	0.003798	0	0
ENST00000574733	ENSG00000153406	NMRAL1	0.056075	0.132986	0.091078	0.012167	0.014508	0.088496
ENST00000549465	ENSG00000118596	SLC16A7	0.008447	0.132764	0.003978	0	0	0
ENST00000428637	ENSG00000173166	RAPH1	0.072053	0.132241	0.094546	0.116546	0.008716	0.003081
ENST00000586203	ENSG00000167380	ZNF226	0.123545	0.132153	0.07044	0.106769	0.03588	0.010447
ENST00000560726	ENSG00000140374	ETFA	0	0.131941	0.066061	0	0.004026	0.001517
ENST00000331336	ENSG00000184619	KRBA2	0.004564	0.131927	0.003693	0.004372	0.011759	0.007742
ENST00000558201	ENSG00000140332	TLE3	0.04492	0.131869	0.084824	0.040251	0.048561	0.052469
ENST00000565291	ENSG00000137842	TMEM62	0	0.131751	0	0.029042	0	0.051285
ENST00000573213	ENSG00000187838	PLSCR3	0.00095	0.131616	0.000949	0.001271	0.002626	0.003151
ENST00000574987	ENSG00000167720	SRR	0	0.131476	0	0	0	0
ENST00000522835	ENSG00000198363	ASPH	0.056427	0.131398	0.073757	0	0.056138	0.019121
ENST00000407583	ENSG00000198522	GPN1	0	0.131248	0	0.075518	0	0.076228
ENST00000639942	ENSG00000278023	RDM1	0.032314	0.131073	0	0	0	0
ENST00000593873	ENSG00000268750	AC010522.1	0.06669	0.130515	0.069527	0.037516	0.058801	0.035073
ENST00000448424	ENSG00000123191	ATP7B	0.001995	0.130342	0	0	0	0
ENST00000625099	ENSG00000254827	SLC22A18AS	0	0.13026	0.008705	0	0	0
ENST00000437245	ENSG00000135837	CEP350	0.085298	0.130219	0.032023	0.120097	0.014777	0.006937
ENST00000468236	ENSG00000095794	CREM	0.000507	0.130146	0	0.046656	0	0.103109
ENST00000532817	ENSG00000167646	DNAAF3	0.064554	0.129737	0.045239	0.051304	0.026742	0.063213
ENST00000487865	ENSG00000102471	NDFIP2	0.011653	0.129649	0.103718	0.027794	0.044834	0
ENST00000526432	ENSG00000162241	SLC25A45	0.076593	0.12952	0.061156	0	0.044206	0.084299
ENST00000449399	ENSG00000197249	SERPINA1	0.095673	0.129438	0.069027	0	0	0
ENST00000603989	ENSG00000141027	NCOR1	0.065411	0.129247	0.063653	0.118513	0.004535	0.024885
ENST00000569445	ENSG00000149932	TMEM219	0.004417	0.12888	0.003925	0.001735	6.5e-05	0.150385
ENST00000517661	ENSG00000198363	ASPH	0	0.128847	0	0	0	0
ENST00000403987	ENSG00000128342	LIF	0.041283	0.128475	0.083168	0.027787	0.031221	0
ENST00000274498	ENSG00000145819	ARHGAP26	0.000913	0.128437	0.000335	0.002188	0.001321	0.001671
ENST00000457512	ENSG00000114859	CLCN2	0	0.12841	0	0	0	0
ENST00000397332	ENSG00000116990	MYCL	0.041441	0.12838	0.024727	0.007899	0.011487	0.124106
ENST00000631047	ENSG00000115368	WDR75	0.027651	0.128353	0.04126	0.068603	0	0.055868
ENST00000264431	ENSG00000109756	RAPGEF2	0.109045	0.128297	0.08618	0.002766	0.064818	0.045532
ENST00000601887	ENSG00000181894	ZNF329	0	0.128011	0	0	0	0
ENST00000295966	ENSG00000163689	C3orf67	0.001604	0.127965	0.003359	0.016953	0	0.063674
ENST00000400246	ENSG00000100150	DEPDC5	0.038891	0.127785	0	0	0	0.055703
ENST00000603546	ENSG00000087460	GNAS	0.060394	0.127489	0.052815	0	0.062398	0.040201
ENST00000575885	ENSG00000131650	KREMEN2	0	0.126303	0	0	0.032494	0.027138
ENST00000544286	ENSG00000149743	TRPT1	0.028851	0.126298	0.071745	0.055518	0.020466	0.07746
ENST00000576599	ENSG00000175711	B3GNTL1	0.115216	0.125983	0.099282	0.020759	0.03261	0.002604
ENST00000524869	ENSG00000149091	DGKZ	0.135331	0.12574	0.063758	0	0.055581	0.0564
ENST00000432248	ENSG00000164535	DAGLB	0	0.125572	0	0	0	0
ENST00000460673	ENSG00000106290	TAF6	0.044687	0.125229	0	0.035385	0	0.060319
ENST00000545622	ENSG00000164484	TMEM200A	0.066333	0.124895	0.076574	0	0	0
ENST00000580306	ENSG00000154957	ZNF18	0.037532	0.124647	0.036908	0.000204	0.025376	0.047129
ENST00000395184	ENSG00000138639	ARHGAP24	0.019575	0.124618	0.02277	0.020728	0.031201	0.032221
ENST00000622252	ENSG00000162946	DISC1	0	0.124592	0.022706	0	0	0
ENST00000576380	ENSG00000185624	P4HB	0	0.124473	0.104308	0.178688	0	0
ENST00000407263	ENSG00000011105	TSPAN9	0.022151	0.124253	0.050259	0.033199	0.031528	0.057315
ENST00000439084	ENSG00000196141	SPATS2L	0	0.124209	0	0	0	0
ENST00000511262	ENSG00000114670	NEK11	0.058286	0.124137	0.083052	0.045218	0	0.025443
ENST00000548498	ENSG00000211584	SLC48A1	0.071398	0.123969	0.027447	0.016589	0.097113	0.038751
ENST00000569958	ENSG00000140650	PMM2	0	0.123865	0	0	0	0
ENST00000379409	ENSG00000187583	PLEKHN1	0	0.123608	0	0	0	0
ENST00000554283	ENSG00000165792	METTL17	0.024864	0.123588	0.108679	0.03052	0.095682	0.053814
ENST00000635452	ENSG00000213689	TREX1	0.081556	0.123454	0.041208	0.011989	0.053852	0.029048
ENST00000538383	ENSG00000074527	NTN4	0.05086	0.123227	0.088543	0.062546	0.034511	0.0848
ENST00000581024	ENSG00000072134	EPN2	0.118581	0.12307	0.074555	0.004593	0.066767	0.005007
ENST00000540710	ENSG00000089693	MLF2	8.3e-05	0.122952	0.017749	0.00012	3.9e-05	0.000101
ENST00000457098	ENSG00000115207	GTF3C2	0	0.122732	0.092154	0	0	0.11095
ENST00000369125	ENSG00000085382	HACE1	0	0.1225	0	0	0	0
ENST00000460890	ENSG00000085276	MECOM	0	0.122284	0	0	0	0
ENST00000380920	ENSG00000141505	ASGR1	0	0.122243	0	0	0	0
ENST00000593939	ENSG00000011422	PLAUR	0	0.122213	0	0.011658	0	0.032879
ENST00000515005	ENSG00000113658	SMAD5	0	0.122039	0.054646	0.111041	0.083746	0
ENST00000550173	ENSG00000111371	SLC38A1	0.058584	0.122019	0.106334	0.067715	0	0.070031
ENST00000612651	ENSG00000143811	PYCR2	0	0.121672	0	0	0	0
ENST00000397299	ENSG00000243789	JMJD7	0.056967	0.12162	0.102234	0.001838	0.030822	0.008388
ENST00000582322	ENSG00000170677	SOCS6	0.055383	0.121146	0.003742	0.002482	0.043482	0.044602
ENST00000521829	ENSG00000155975	VPS37A	0.088288	0.120764	0.04517	0.038536	0.048765	0.057563
ENST00000486402	ENSG00000147044	CASK	0.068186	0.119866	0.07845	0.030555	0.057214	0.038432
ENST00000318315	ENSG00000178776	C5orf46	0.034669	0.119824	0.056046	0.005072	0	0.007008
ENST00000530872	ENSG00000118096	IFT46	0	0.119749	0	0	0	0
ENST00000584031	ENSG00000008283	CYB561	0	0.119553	0	0	0	0
ENST00000613595	ENSG00000269713	NBPF9	0	0.119533	0	0	0	0
ENST00000591396	ENSG00000161888	SPC24	0	0.119208	0	0.035594	0	0.05245
ENST00000527631	ENSG00000117859	OSBPL9	0.006591	0.119148	0.004907	0.021972	0	0
ENST00000503335	ENSG00000145794	MEGF10	0.085378	0.118972	0.008485	0.042211	0.093116	0.002908
ENST00000623361	ENSG00000106012	IQCE	0.06059	0.118962	0.066043	0.022321	0.080412	0.057685
ENST00000596731	ENSG00000105583	WDR83OS	0.080541	0.11867	0.083192	0.004607	0.000958	0.070674
ENST00000562363	ENSG00000140497	SCAMP2	0.100895	0.118598	0.089075	0	0	0.11589
ENST00000417752	ENSG00000116750	UCHL5	0	0.117494	0	0	0	0
ENST00000528443	ENSG00000143337	TOR1AIP1	0.050527	0.117472	0	0	0	0.079036
ENST00000531214	ENSG00000177542	SLC25A22	0	0.11728	0	0	0	0
ENST00000562473	ENSG00000103485	QPRT	0	0.117061	0.058957	0	0	0.14749
ENST00000526087	ENSG00000198945	L3MBTL3	0.006101	0.116908	0.059155	0.075007	0.028776	0.034546
ENST00000555611	ENSG00000198894	CIPC	0.006556	0.116832	0.000208	0.023249	0.006029	0.009296
ENST00000582567	ENSG00000172456	FGGY	0.003144	0.116789	0.011903	0.009863	0.059817	0.058629
ENST00000372674	ENSG00000133134	BEX2	0.056851	0.116638	0.090118	0.069323	0.024836	0.051456
ENST00000277657	ENSG00000216937	CCDC7	0	0.116453	0	0	0.004923	0
ENST00000294256	ENSG00000162298	SYVN1	0.001409	0.116425	0.062963	0.002107	0.065996	0.058713
ENST00000617904	ENSG00000054116	TRAPPC3	0.019639	0.116191	0.078214	0.025654	0.0085	0.027923
ENST00000476044	ENSG00000120756	PLS1	0	0.116023	0.109729	0.086102	0.073104	0
ENST00000523410	ENSG00000119280	C1orf198	0.009418	0.115928	0	0	0	0.062271
ENST00000635769	ENSG00000104763	ASAH1	0.032796	0.115764	0	0	0	0.057788
ENST00000471912	ENSG00000134864	GGACT	0.077871	0.115692	0.0861	0.047481	0	0.05731
ENST00000223122	ENSG00000106392	C1GALT1	0.002198	0.115681	0.002015	0.001841	0.00341	0.031268
ENST00000649563	ENSG00000183765	CHEK2	0	0.11564	0	0	0	0
ENST00000619791	ENSG00000139718	SETD1B	0.093562	0.115574	0.067692	0	0	0.107081
ENST00000514960	ENSG00000145362	ANK2	0.000939	0.115368	0.090076	0	0.073268	0.111958
ENST00000545927	ENSG00000173391	OLR1	0.020151	0.115325	0.021392	0.030269	0.016287	0.087152
ENST00000585926	ENSG00000197563	PIGN	0.033793	0.11499	0.064237	0.043128	0.031604	0.023457
ENST00000625810	ENSG00000168397	ATG4B	0.000498	0.114962	0.000102	0.000278	0.00321	0.043381
ENST00000430547	ENSG00000093000	NUP50	0	0.114961	0	0	0	0
ENST00000562557	ENSG00000103495	MAZ	0	0.114917	0	0	0	0
ENST00000531142	ENSG00000175352	NRIP3	0.020834	0.114826	0.028078	0.008363	0.077674	0.070119
ENST00000395029	ENSG00000081059	TCF7	0	0.114803	0	0	0	0
ENST00000312143	ENSG00000174600	CMKLR1	0	0.114773	0	0	0	0
ENST00000370777	ENSG00000101928	MOSPD1	0.07356	0.114687	0.105457	0.062414	0.020775	0.030017
ENST00000537100	ENSG00000139372	TDG	0.053036	0.114471	0	0	0	0
ENST00000555215	ENSG00000092199	HNRNPC	0.009655	0.11432	0.064898	0.035332	0.074915	0.051985
ENST00000526508	ENSG00000175224	ATG13	0.077322	0.114259	0.037729	0.061344	0.059028	0.007072
ENST00000412368	ENSG00000161999	JMJD8	0.033872	0.114191	0.034789	0.041614	0.044163	0.045149
ENST00000555993	ENSG00000006432	MAP3K9	0.031266	0.113642	0.033331	0.013945	0.022125	0.046878
ENST00000601924	ENSG00000105750	ZNF85	0.085211	0.113379	0.080473	0.055488	0	0
ENST00000523187	ENSG00000147471	PLPBP	0.059805	0.113315	0.080877	0.074284	0.003487	0.003055
ENST00000600911	ENSG00000126456	IRF3	0.044445	0.113043	0.029816	0.088615	0.033819	0
ENST00000592193	ENSG00000188878	FBF1	0.062555	0.112968	0.005471	0.058714	0.042618	0.006754
ENST00000561741	ENSG00000140995	DEF8	0	0.112941	0.088851	0	0	0
ENST00000318387	ENSG00000122952	ZWINT	0.054188	0.112818	0.030242	0.004664	0.016466	0.074084
ENST00000530823	ENSG00000133816	MICAL2	0.114925	0.112634	0.105163	0.052293	0.008507	0.083954
ENST00000525819	ENSG00000138814	PPP3CA	0	0.112467	0	0	0.001108	0
ENST00000548401	ENSG00000050426	LETMD1	0.078185	0.112271	0.088562	0.043568	0.07607	0.007448
ENST00000335894	ENSG00000103599	IQCH	0.033429	0.111874	0.023936	0.044016	0.042132	0.040699
ENST00000452794	ENSG00000184381	PLA2G6	0.053624	0.111868	0.010504	0.05883	0	0.053544
ENST00000488328	ENSG00000095794	CREM	0.025904	0.111726	0.060826	0.04899	0.039161	0.03353
ENST00000493032	ENSG00000085999	RAD54L	0	0.111712	0.08484	0	0	0
ENST00000616907	ENSG00000136104	RNASEH2B	0.058072	0.111624	0.090128	0.034153	0.009223	0.052471
ENST00000426668	ENSG00000180370	PAK2	0.047627	0.111357	0.072512	0.011424	0.064425	0.071397
ENST00000368827	ENSG00000182134	TDRKH	0.005161	0.111138	0.002725	0.00137	0.002604	0.008789
ENST00000577250	ENSG00000101782	RIOK3	0	0.110975	0	0	0	0
ENST00000529583	ENSG00000150433	TMEM218	0.023285	0.110503	0	0	0	0
ENST00000415139	ENSG00000107968	MAP3K8	0.004369	0.110478	0.000789	0.011119	0	0
ENST00000614244	ENSG00000011332	DPF1	0.006035	0.110208	0.103331	0.054899	0.064971	0.035596
ENST00000496749	ENSG00000100503	NIN	0.0526	0.110187	0.094088	0.067962	0.030322	0.044384
ENST00000625061	ENSG00000067646	ZFY	0.049465	0.11005	0	0	0	0
ENST00000416476	ENSG00000114439	BBX	0	0.110022	0	0	0	0
ENST00000585927	ENSG00000133265	HSPBP1	0.088982	0.109867	0.100008	0.09811	0.056988	0
ENST00000452027	ENSG00000154548	SRSF12	0.04736	0.109624	0.071639	0.020026	0.011695	0.021407
ENST00000551050	ENSG00000139174	PRICKLE1	0.075699	0.109523	0.015993	0.011245	0.038043	0.046356
ENST00000398896	ENSG00000172046	USP19	6.8e-05	0.109266	0.001282	0.00019	0.001542	0.001996
ENST00000513317	ENSG00000151726	ACSL1	0.045827	0.109225	0.014081	0.012038	0.011077	0
ENST00000643712	ENSG00000154864	PIEZO2	0.034399	0.10902	0	0	0	0
ENST00000406818	ENSG00000138101	DTNB	0	0.108943	0	0	0	0
ENST00000318041	ENSG00000137070	IL11RA	0	0.10891	0	0	0	0
ENST00000596673	ENSG00000125733	TRIP10	0.009749	0.108728	0.062069	0.050054	0.020799	0.058569
ENST00000550745	ENSG00000197647	ZNF433	0	0.108291	0.049001	0	0.075799	0
ENST00000484086	ENSG00000111445	RFC5	0.041086	0.108237	0.088119	0	0.096347	0.068743
ENST00000510700	ENSG00000163138	PACRGL	0.010239	0.108181	0.08191	0.05075	0.019	0.061404
ENST00000549003	ENSG00000152556	PFKM	0.021584	0.108009	0.048467	0	0.09934	0.001866
ENST00000448667	ENSG00000198556	ZNF789	0.023723	0.108	0.004347	0.021193	0	0.004339
ENST00000477601	ENSG00000144802	NFKBIZ	0	0.107776	0.067305	0	0	0
ENST00000464496	ENSG00000075785	RAB7A	0.096778	0.107445	0.043966	0.051971	0.025373	0.02841
ENST00000523885	ENSG00000091656	ZFHX4	0.045163	0.107211	0.086609	0.062826	0.097819	0.006269
ENST00000502918	ENSG00000168826	ZBTB49	0	0.107109	0.081594	0.035441	0.083192	0.033208
ENST00000339992	ENSG00000188816	HMX2	0.050641	0.10709	0.023386	0.047955	0.041012	0.041435
ENST00000008180	ENSG00000008517	IL32	0.051094	0.106845	0.072696	0.022528	0.038114	0.031686
ENST00000517668	ENSG00000008513	ST3GAL1	0.058968	0.106301	0	0	0	0
ENST00000399187	ENSG00000171962	DRC3	0.044685	0.105699	0	0.005022	0	0
ENST00000618422	ENSG00000160352	ZNF714	0.027826	0.105616	0.058907	0.000217	0.05572	0.042269
ENST00000588659	ENSG00000184988	TMEM106A	0.000939	0.105388	0	0.001051	0.003629	0
ENST00000587945	ENSG00000062716	VMP1	0.069396	0.105256	0	0	0.058604	0.048802
ENST00000620103	ENSG00000185499	MUC1	0	0.105225	0	0	0	0.000733
ENST00000367225	ENSG00000091844	RGS17	0.018938	0.104479	0.096859	0.012762	0.002995	0.094089
ENST00000415254	ENSG00000147576	ADHFE1	0.001022	0.104422	0.071259	0.040513	0.043327	0.028706
ENST00000650761	ENSG00000132170	PPARG	0	0.104349	0.032179	0.01862	0.017383	0.027519
ENST00000420848	ENSG00000172661	WASHC2C	0	0.104335	0.07951	0	0.114316	0
ENST00000434349	ENSG00000128159	TUBGCP6	0.081947	0.104038	0.080908	0	0	0
ENST00000414884	ENSG00000070669	ASNS	0.030154	0.103979	0.050058	0.055974	0.050075	0.038912
ENST00000527099	ENSG00000159063	ALG8	0	0.103398	0.013781	0.039154	0	0.052854
ENST00000416858	ENSG00000125454	SLC25A19	0.032604	0.102922	0.073991	0.004164	0.136526	0.003578
ENST00000625044	ENSG00000272674	PCDHB16	0.03765	0.102821	0.07583	0.065888	0.038465	0.037614
ENST00000488109	ENSG00000005238	FAM214B	0.03576	0.102663	0.023262	0.036828	0	0.04634
ENST00000527735	ENSG00000070081	NUCB2	0	0.102624	0.077515	0.057954	0.031145	0
ENST00000452926	ENSG00000170852	KBTBD2	0	0.102543	0	0	0	0.05317
ENST00000418201	ENSG00000115526	CHST10	0.085583	0.102481	0.035976	0.036047	0.067926	0.022807
ENST00000503368	ENSG00000078140	UBE2K	0.069379	0.102451	0.050779	0	0.024109	0
ENST00000531234	ENSG00000110675	ELMOD1	0.037845	0.102404	0.047458	0.024765	0.030988	0.061365
ENST00000647317	ENSG00000204147	ASAH2B	0.015601	0.102119	0.031232	0.021532	0.01894	0.019696
ENST00000568815	ENSG00000157429	ZNF19	0	0.102071	0	0	0	0
ENST00000554691	ENSG00000100731	PCNX1	0.071631	0.101964	0	0	0.09415	0
ENST00000216099	ENSG00000243811	APOBEC3D	0.006058	0.101518	0.014644	0	0	0.007223
ENST00000586717	ENSG00000188878	FBF1	0.023708	0.101468	0.049744	0.06319	0.041721	0.029742
ENST00000537484	ENSG00000177192	PUS1	0	0.101302	0.046148	0.043506	0.079034	0
ENST00000550342	ENSG00000167528	ZNF641	0	0.101228	0.035395	0	0.023768	0
ENST00000595920	ENSG00000090924	PLEKHG2	0.071083	0.101177	0.064685	0.031849	0.052965	0.050151
ENST00000370673	ENSG00000203943	SAMD13	0.001653	0.101104	0.058615	0.083063	0	0.004566
ENST00000618298	ENSG00000103264	FBXO31	0	0.100895	0.001035	0	0.00244	0
ENST00000613312	ENSG00000167522	ANKRD11	7.1e-05	0.100774	0.001075	1.7e-05	8.9e-05	8e-06
ENST00000252329	ENSG00000157778	PSMG3	0.024571	0.100772	0.075369	0	0	0.005188
ENST00000624758	ENSG00000273590	SMIM11B	0	0.100706	0	0	2e-06	0.016262
ENST00000557309	ENSG00000100605	ITPK1	0.072165	0.100648	0.080749	0.056223	0.049964	0.043289
ENST00000418635	ENSG00000112033	PPARD	0	0.100458	0.016094	0	0	0
ENST00000593625	ENSG00000176678	FOXL1	0	0.100291	0.07312	0.014363	0.019117	0.095623
ENST00000389341	ENSG00000028277	POU2F2	0.045526	0.100164	0.088049	0.034297	0.053715	0.04727
ENST00000418304	ENSG00000054267	ARID4B	0.070412	0.100121	0.071889	0.071005	0.079136	0
ENST00000601373	ENSG00000126456	IRF3	0	0.099989	0	0	0	0.040019
ENST00000420266	ENSG00000095787	WAC	0	0.099937	0.039499	0.006843	0.069976	0
ENST00000645470	ENSG00000065883	CDK13	0.048449	0.099934	0.026376	0.026453	0.025031	0.018975
ENST00000524323	ENSG00000159167	STC1	0.072026	0.099902	0.028252	0.015725	0.003909	0.026171
ENST00000417581	ENSG00000107951	MTPAP	0.044705	0.099791	0.056164	0.049384	0.047047	0.018759
ENST00000547925	ENSG00000170473	PYM1	0	0.099553	0	0	0.014088	0
ENST00000367093	ENSG00000162892	IL24	0	0.09947	0.027769	0.036578	0.046111	0.042131
ENST00000452190	ENSG00000188610	FAM72B	0	0.099256	0	0	0	0
ENST00000554131	ENSG00000080815	PSEN1	0	0.099174	0	0	0	0.021766
ENST00000510164	ENSG00000122203	KIAA1191	0.050207	0.09907	0.024541	0	0	0.102068
ENST00000432734	ENSG00000006652	IFRD1	0.038782	0.099039	0.007792	0.103796	0.006801	0
ENST00000344119	ENSG00000188833	ENTPD8	0.031699	0.098843	0	0	0.040976	0.068684
ENST00000345044	ENSG00000133460	SLC2A11	0.002329	0.098807	0	0	0	0.042111
ENST00000424768	ENSG00000105835	NAMPT	0.02564	0.09875	0.048774	0.061205	0	0
ENST00000627960	ENSG00000159459	UBR1	0.036205	0.098721	0.006341	0	0.002077	0
ENST00000554534	ENSG00000126773	PCNX4	0.041445	0.098397	0.033301	0.00337	0.055457	0.024515
ENST00000393704	ENSG00000198948	MFAP3L	0	0.098389	0	0	0	0
ENST00000272223	ENSG00000143867	OSR1	0.005458	0.098222	0.041012	0.019939	0	0.013451
ENST00000342294	ENSG00000136527	TRA2B	0.006152	0.098022	0.041398	0.030486	0.011276	0.069811
ENST00000612899	ENSG00000118503	TNFAIP3	0.040884	0.097872	0.033976	0.015867	0.0501	0.004174
ENST00000529528	ENSG00000134339	SAA2	0	0.097638	0	0	0	0
ENST00000267017	ENSG00000139574	NPFF	0	0.097535	0.053164	0	0	0.051601
ENST00000512111	ENSG00000145332	KLHL8	0.008729	0.097522	0.009674	0.015326	0.010091	0.008003
ENST00000406998	ENSG00000112182	BACH2	0.041924	0.097426	0.076436	0	0.057699	0.025946
ENST00000414986	ENSG00000052749	RRP12	0	0.09698	0	0	0	0
ENST00000311661	ENSG00000173918	C1QTNF1	0	0.096959	0	0	0	0
ENST00000358356	ENSG00000159216	RUNX1	0.070824	0.096358	0.059941	0.028698	0.020676	0.044931
ENST00000483089	ENSG00000198556	ZNF789	0.034094	0.096271	0.075591	0.040576	0.097663	0
ENST00000512840	ENSG00000109680	TBC1D19	0	0.095522	0.029671	0	0	0
ENST00000455663	ENSG00000129682	FGF13	0.005478	0.095196	0.03027	0.008781	0	0.008152
ENST00000558594	ENSG00000166262	FAM227B	0	0.09512	0	0	0	0
ENST00000624873	ENSG00000266028	SRGAP2	0.111054	0.094592	0.083206	0.10955	0	0
ENST00000393667	ENSG00000173230	GOLGB1	0.035507	0.094527	0.020885	0.005683	0.00735	0.004431
ENST00000480444	ENSG00000118518	RNF146	0.068309	0.094431	0.050272	0.002178	0.058717	0.060797
ENST00000443977	ENSG00000115825	PRKD3	0.046374	0.094225	0.063889	0.050295	0.038867	0
ENST00000539678	ENSG00000184162	NR2C2AP	0.018049	0.094089	0.072609	0.106031	0.017357	0.0149
ENST00000436961	ENSG00000132141	CCT6B	0	0.093773	0	0	0	0
ENST00000257749	ENSG00000112182	BACH2	0.001412	0.093751	0.068957	0.034705	0.03081	0.001952
ENST00000503665	ENSG00000151883	PARP8	0	0.093602	0.032926	0	0.028171	0.011248
ENST00000556451	ENSG00000151338	MIPOL1	0.028673	0.093186	0.081049	0.021167	0.00968	0.093579
ENST00000518084	ENSG00000157168	NRG1	0.015451	0.092983	0.017017	0.028014	0.007256	0.05401
ENST00000498592	ENSG00000178053	MLF1	0	0.092941	0	0	0.030736	0.032456
ENST00000579671	ENSG00000160602	AC010761.1	0.036891	0.092611	0.070527	0	0	0
ENST00000376485	ENSG00000137343	ATAT1	0.009056	0.092464	0.002337	0.005426	0.01578	0.032518
ENST00000652664	ENSG00000145861	C1QTNF2	0.008602	0.092439	0.000649	0.004376	0.004889	0.004663
ENST00000426335	ENSG00000149182	ARFGAP2	0.020996	0.092413	0.031893	0.042962	0.089302	0
ENST00000405002	ENSG00000144504	ANKMY1	0.047215	0.092164	0.07394	0.000119	0.072952	0.041983
ENST00000545034	ENSG00000100439	ABHD4	0.020031	0.09216	0	0	0.03179	0.023343
ENST00000469131	ENSG00000145819	ARHGAP26	0.000246	0.092104	0.044401	0.003341	0.000322	0.000312
ENST00000589020	ENSG00000179954	SSC5D	0.048066	0.091785	0.037153	0	0	0
ENST00000429527	ENSG00000139350	NEDD1	0	0.091709	0	0	0	0
ENST00000441793	ENSG00000204463	BAG6	0.026057	0.091654	0.029258	0.03267	0.061824	0.028251
ENST00000450805	ENSG00000061273	HDAC7	0	0.091517	0	0	0	0
ENST00000301455	ENSG00000167772	ANGPTL4	0.014216	0.091445	0.06079	0.03335	0.005381	0.026258
ENST00000419497	ENSG00000172432	GTPBP2	0.044711	0.091414	0.078772	0	0	0.120619
ENST00000596193	ENSG00000249709	ZNF564	0.081541	0.091353	0.060114	0.009978	0.029985	0
ENST00000457067	ENSG00000107872	FBXL15	0.057936	0.091336	0.067722	0.060282	0.024338	0.045267
ENST00000532975	ENSG00000117859	OSBPL9	0	0.091306	0	0	0	0.004287
ENST00000560632	ENSG00000104047	DTWD1	0	0.091289	0	0	0	0
ENST00000305991	ENSG00000170290	SLN	0	0.091157	0.023276	0	0.072668	0.02696
ENST00000458602	ENSG00000026751	SLAMF7	0	0.091126	0	0	0	0.032414
ENST00000526884	ENSG00000170322	NFRKB	0	0.091085	0	0	0	0
ENST00000411552	ENSG00000106100	NOD1	0.025313	0.090708	0.043031	0.065812	0.019559	0.046634
ENST00000553291	ENSG00000100814	CCNB1IP1	0	0.090565	0.079168	0.012215	0	0.069311
ENST00000533389	ENSG00000133816	MICAL2	0.008227	0.090377	0.052324	0.010963	0.010731	0.024456
ENST00000583352	ENSG00000108465	CDK5RAP3	0.070254	0.090355	0.06369	0.075482	0.01681	0.021407
ENST00000341919	ENSG00000141905	NFIC	0.003156	0.090216	0.033825	0.030165	0.001958	0.053558
ENST00000644608	ENSG00000100983	GSS	0	0.090026	0.032418	0	0	0.068978
ENST00000533095	ENSG00000100583	SAMD15	0.00185	0.089926	0.083919	0.044953	0	0.048489
ENST00000418341	ENSG00000127948	POR	0.012991	0.089909	0.011339	0.036934	0.013894	0.049731
ENST00000589822	ENSG00000072958	AP1M1	0.030848	0.089877	0.032132	0.0155	0.027432	0.021104
ENST00000536064	ENSG00000124356	STAMBP	0.073901	0.089713	0.051634	0	0	0.068177
ENST00000396096	ENSG00000093000	NUP50	0.083387	0.089626	0.0863	0.023439	0.077638	0.024294
ENST00000555355	ENSG00000100445	SDR39U1	0.092978	0.089036	0.067965	0.024724	0.011194	0.032977
ENST00000488356	ENSG00000144908	ALDH1L1	0	0.088992	0.034838	0	0.040943	0.05279
ENST00000642721	ENSG00000136104	RNASEH2B	0	0.088779	0	0	0	0
ENST00000314728	ENSG00000072134	EPN2	0.000178	0.088585	0.063888	0.001703	0	0.002742
ENST00000357116	ENSG00000049130	KITLG	0	0.088359	0	0	0	0
ENST00000590061	ENSG00000141646	SMAD4	0	0.088356	0	0	0	0
ENST00000522736	ENSG00000177873	ZNF619	0.068696	0.088125	0.026181	0.007077	0.003457	0.040707
ENST00000550603	ENSG00000177425	PAWR	0.002021	0.088077	0.060766	0.003442	0.001318	0.001784
ENST00000531965	ENSG00000008517	IL32	0.051703	0.088029	0.046007	0.016738	0.04088	0
ENST00000431821	ENSG00000003509	NDUFAF7	0	0.087991	0	0	0	0
ENST00000304808	ENSG00000168092	PAFAH1B2	0	0.087986	0	0	0	0
ENST00000439476	ENSG00000176697	BDNF	0.091206	0.087814	0.064247	0.02013	0	0.057745
ENST00000371719	ENSG00000148680	HTR7	0	0.087778	0	0	0	0
ENST00000652534	ENSG00000172936	MYD88	0	0.087439	0.011438	0	0	0
ENST00000437220	ENSG00000136052	SLC41A2	0.028025	0.087348	0.054082	0.063424	0	0
ENST00000431392	ENSG00000183891	TTC32	0.017085	0.087266	0.060704	0.008824	0.122715	0.014708
ENST00000555017	ENSG00000100934	SEC23A	0	0.087193	0.04741	0.05793	0	0
ENST00000611674	ENSG00000268606	MAGEA2	0	0.087036	0	0	0	0
ENST00000400952	ENSG00000185842	DNAH14	0.001313	0.086986	0.061888	0.104516	0.019977	0.002565
ENST00000238667	ENSG00000119686	FLVCR2	0.072905	0.08691	0.031733	0.038115	0.04478	0.013023
ENST00000434728	ENSG00000128283	CDC42EP1	0.062215	0.086776	0.013925	0.029167	0.018875	0.039487
ENST00000552374	ENSG00000198270	TMEM116	0.013879	0.086684	0.006329	0.006455	0.042206	0.039714
ENST00000639097	ENSG00000109911	ELP4	0	0.086665	0	0	0	0
ENST00000532035	ENSG00000011405	PIK3C2A	0.037937	0.086384	0.008081	0.014993	0.008613	0.020591
ENST00000518480	ENSG00000104419	NDRG1	0	0.086324	0	0	0	0.038881
ENST00000356331	ENSG00000087266	SH3BP2	0	0.085251	0	0	0	0
ENST00000612702	ENSG00000157551	KCNJ15	0.001886	0.08524	0.008777	0.013448	0	0
ENST00000536354	ENSG00000151790	TDO2	0	0.084824	0.015063	0	0	0.028741
ENST00000568803	ENSG00000069974	RAB27A	0.048138	0.084784	0.015254	0	0	0.006845
ENST00000417819	ENSG00000131828	PDHA1	0.019997	0.08468	0.04227	0.02346	0.022781	0.002644
ENST00000340624	ENSG00000129214	SHBG	0	0.084663	0	0	0.013269	0.010793
ENST00000642547	ENSG00000197852	INKA2	0	0.084365	0	0	0	0.093451
ENST00000557385	ENSG00000177485	ZBTB33	0.003544	0.08428	0.003214	0.012646	0.001837	0.002847
ENST00000407467	ENSG00000169884	WNT10B	0	0.084244	0	0	0	0
ENST00000542562	ENSG00000060140	STYK1	0.079219	0.084003	0.056237	0.019692	0.071443	0.013581
ENST00000647797	ENSG00000187498	COL4A1	0.035559	0.083891	0.010292	0.021666	0.029598	0.040291
ENST00000618487	ENSG00000197619	ZNF615	0.068428	0.083595	0.06205	0.009664	0.002816	0.082287
ENST00000403638	ENSG00000115687	PASK	0.037899	0.083563	0.037261	0.000219	0.027279	0.05399
ENST00000565925	ENSG00000103121	CMC2	0.059346	0.083541	0.045289	0	0.061691	0.040522
ENST00000560392	ENSG00000086666	ZFAND6	0	0.083455	0.004982	0	0	0.01519
ENST00000601916	ENSG00000105662	CRTC1	0.06635	0.082943	0	0.063924	0	0
ENST00000310164	ENSG00000174460	ZCCHC12	0.082344	0.082763	0.076959	0	0.033386	0.045705
ENST00000524871	ENSG00000149972	CNTN5	0.016524	0.082436	0.000267	0.015572	0.00136	9.8e-05
ENST00000466189	ENSG00000173889	PHC3	0	0.082411	0	0	0	0
ENST00000478951	ENSG00000144834	TAGLN3	0.003964	0.082135	0	0	0	0
ENST00000306888	ENSG00000072201	LNX1	0.058066	0.082077	0.075279	0.044914	0.034569	0.021405
ENST00000231449	ENSG00000113520	IL4	0	0.081811	0	0	0	0
ENST00000453600	ENSG00000070669	ASNS	0.013721	0.081811	0.024421	0.013651	0	0.052967
ENST00000561183	ENSG00000170113	NIPA1	0.009217	0.081752	0.077852	0.016088	0.092577	0.020977
ENST00000261796	ENSG00000127743	IL17B	0	0.081686	0.024003	0.000757	0.06632	0.027615
ENST00000525220	ENSG00000105397	TYK2	0	0.081498	0	0	0	0
ENST00000440705	ENSG00000028116	VRK2	0	0.081324	0	0	0	0
ENST00000566741	ENSG00000203727	SAMD5	0.053867	0.081304	0	0	0	0.062262
ENST00000581672	ENSG00000105655	ISYNA1	0.003755	0.081303	0	0.00876	0.002937	0.025193
ENST00000441946	ENSG00000131467	PSME3	0.037193	0.081291	0.008958	0.050961	0.029071	0.006083
ENST00000495645	ENSG00000033100	CHPF2	0	0.081093	0.000641	0.000888	0.000961	0.072281
ENST00000597161	ENSG00000167766	ZNF83	0.00132	0.081074	0.001559	1.4e-05	0.000109	0.002289
ENST00000443148	ENSG00000214021	TTLL3	0	0.080691	0	0	0	0
ENST00000407930	ENSG00000213626	LBH	0	0.080326	0	0	0	0.075624
ENST00000249289	ENSG00000128524	ATP6V1F	0.012501	0.080224	0.039292	0.027979	0.030636	0.038398
ENST00000508312	ENSG00000204580	DDR1	0.004758	0.079998	0.062155	0	0	0.103893
ENST00000329759	ENSG00000185112	FAM43A	0.048359	0.079969	0.029626	0.019875	0.025749	0.055816
ENST00000344686	ENSG00000006062	MAP3K14	0.010703	0.079961	0.058858	0.086378	0.039353	0.003797
ENST00000425011	ENSG00000133142	TCEAL4	0.045515	0.079567	0.054726	0	0.042442	0.04247
ENST00000515385	ENSG00000170365	SMAD1	0.004941	0.079468	0.056079	0.005016	0.004329	0.008354
ENST00000522526	ENSG00000171757	LRRC34	0	0.079314	0	0	0	0
ENST00000372956	ENSG00000182489	XKRX	0.04677	0.079311	0.028445	0.012779	0.011381	0.020619
ENST00000306406	ENSG00000171227	TMEM37	0.050879	0.079292	0.027623	0	0.040285	0.043551
ENST00000530094	ENSG00000198561	CTNND1	0	0.07923	0	0	0	0.059318
ENST00000437775	ENSG00000106077	ABHD11	0	0.079032	0	0	0	0
ENST00000615299	ENSG00000023445	BIRC3	0.068409	0.079009	0.05619	0.006969	0.026289	0.020134
ENST00000261018	ENSG00000138443	ABI2	0	0.078797	0	0.001053	0	0
ENST00000484715	ENSG00000153767	GTF2E1	0.024408	0.078606	0.050155	0.011163	0.009662	0.018015
ENST00000448915	ENSG00000164610	RP9	0.059017	0.078532	0.022743	0.015641	0.013902	0.032968
ENST00000600645	ENSG00000213024	NUP62	0	0.078519	0.056346	0	0	0
ENST00000490502	ENSG00000126091	ST3GAL3	0.011519	0.078394	0.025356	0.018233	0.020926	0.012172
ENST00000512172	ENSG00000138795	LEF1	0.000663	0.078369	0	0.020907	0.001287	0.002616
ENST00000423767	ENSG00000151689	INPP1	0.018084	0.078277	0.070997	0	0.086059	0.012027
ENST00000419541	ENSG00000144560	VGLL4	0.012153	0.077993	0	0	0	0.003375
ENST00000593447	ENSG00000011422	PLAUR	0.011629	0.077973	0.022535	0.016888	0.071573	0.007566
ENST00000447353	ENSG00000154479	CCDC173	0	0.077642	0.072617	0.054704	0.091818	0
ENST00000444058	ENSG00000171953	ATPAF2	0	0.077627	0.05619	0	0	0
ENST00000594009	ENSG00000090554	FLT3LG	0.052203	0.077623	0.056311	0.011985	0.043539	0.049779
ENST00000509979	ENSG00000134986	NREP	0.035198	0.077293	0.049664	0	0.049526	0
ENST00000367805	ENSG00000117477	CCDC181	0	0.077274	0	0	0	0.056731
ENST00000317745	ENSG00000171476	HOPX	0.04546	0.077223	0.03945	0.018761	0.047587	0.026085
ENST00000559316	ENSG00000166173	LARP6	0.073005	0.076785	0.048903	0	0.024638	0.044846
ENST00000512261	ENSG00000164221	CCDC112	0	0.076704	0.004369	0.005463	0.003515	0.009779
ENST00000637494	ENSG00000128973	CLN6	0.02526	0.076628	0	0	0	0.046339
ENST00000518530	ENSG00000198010	DLGAP2	0.05152	0.076568	0.010711	0.005838	0	0.020818
ENST00000357977	ENSG00000162599	NFIA	0.036898	0.076514	0.033682	0.037632	0.00595	0.054654
ENST00000283296	ENSG00000069122	ADGRF5	0.056574	0.076485	0.051618	0.060025	0.024589	0.02036
ENST00000634287	ENSG00000080503	SMARCA2	0	0.076433	0.069289	0	0.055283	0.002947
ENST00000451771	ENSG00000070669	ASNS	0.002202	0.076262	0.006804	0.004486	0.000152	0.005339
ENST00000636508	ENSG00000283268	TEX54	0.016192	0.076111	0.005374	0.019802	0.006645	0.031455
ENST00000527131	ENSG00000149547	EI24	0.006511	0.076079	0.071577	0	0.046417	0.000935
ENST00000201015	ENSG00000087494	PTHLH	0.000447	0.076073	0.06181	0.014202	0	0.008401
[truncated: 1,765 more rows]

## Sheet: mRNA_No UV_cluster 2_GOenrich
Category	ID	Description	GeneRatio	BgRatio	pvalue	padj	geneID	Count
BP	GO:0006334	nucleosome assembly	55/2711	138/16266	6.63965e-11	3.47984e-07	KAT6A/CABIN1/CENPI/ASF1B/SET/NAA60/HIST1H1D/HIST1H2BJ/HIST1H2BA/CENPU/HIST1H2BD/HIST1H4H/CENPN/HIST3H3/HIST1H1E/STRA13/HIST1H2BC/HIST2H3D/HIST1H1B/HIST2H2BE/NAP1L1/HIST1H1T/HIST1H1C/IPO4/HIST1H4C/HIST1H3J/HIST1H4J/HIST1H3D/HIST1H2BK/HIST2H3C/HIST2H2BF/HIST2H3A/DAXX/NAP1L4/HIST1H2BN/HIST2H4B/HIST1H4K/HIST1H2BM/HIST1H2BG/HIST1H3B/HIST1H2BE/HIST1H2BO/HIST1H3E/HIST1H4L/HIST1H3I/HIST1H3A/HIST1H2BB/HIS…	55
BP	GO:0031497	chromatin assembly	57/2711	154/16266	8.77865e-10	1.94991e-06	TPR/KAT6A/CABIN1/CENPI/ASF1B/SET/NAA60/HIST1H1D/HIST1H2BJ/HMGA1/HIST1H2BA/CENPU/HIST1H2BD/HIST1H4H/CENPN/HIST3H3/HIST1H1E/STRA13/HIST1H2BC/HIST2H3D/HIST1H1B/HIST2H2BE/NAP1L1/HIST1H1T/HIST1H1C/IPO4/HIST1H4C/HIST1H3J/HIST1H4J/HIST1H3D/HIST1H2BK/HIST2H3C/HIST2H2BF/HIST2H3A/DAXX/NAP1L4/HIST1H2BN/HIST2H4B/HIST1H4K/HIST1H2BM/HIST1H2BG/HIST1H3B/HIST1H2BE/HIST1H2BO/HIST1H3E/HIST1H4L/HIST1H3I/HIST1H3A/HIS…	57
BP	GO:0032776	DNA methylation on cytosine	22/2711	35/16266	1.11615e-09	1.94991e-06	DNMT3A/HIST1H4H/HIST2H3D/HIST1H4C/HIST1H3J/HIST1H4J/HIST1H3D/HIST2H3C/HIST2H3A/HIST2H4B/HIST1H4K/HIST1H3B/HIST1H3E/HIST1H4L/HIST1H3I/HIST1H3A/HIST1H4D/HIST1H3F/HIST1H3C/HIST1H4A/HIST1H4B/HIST1H3H	22
BP	GO:0006342	chromatin silencing	45/2711	112/16266	2.5982e-09	3.40429e-06	MSL3/SIRT1/TBP/DNMT3A/HMGA1/HIST1H4H/H2AFZ/HIST1H2AA/MECP2/SIN3A/HIST3H2A/HIST2H3D/HIST2H2AC/HIST2H2AB/MORF4L1/HIST1H2AI/HIST1H2AG/HIST1H4C/HIST1H3J/HIST1H4J/HIST1H3D/HIST2H3C/HIST2H2AA3/HIST2H3A/MBD3L2/HIST2H4B/HIST2H2AA4/HIST1H4K/HIST1H3B/HIST1H3E/HIST1H2AH/HIST1H4L/HIST1H2AK/HIST1H3I/HIST1H3A/HIST1H2AL/HIST1H2AE/HIST1H4D/HIST1H3F/HIST1H3C/HIST1H2AB/HIST1H4A/HIST1H2AM/HIST1H4B/HIST1H3H	45
BP	GO:0034728	nucleosome organization	58/2711	164/16266	4.56839e-09	4.7405e-06	KAT6A/CABIN1/CENPI/ASF1B/SET/NAA60/NFE2/HIST1H1D/HIST1H2BJ/HMGA1/HIST1H2BA/CENPU/HIST1H2BD/HIST1H4H/CENPN/HIST3H3/HIST1H1E/STRA13/HIST1H2BC/HIST3H2A/HIST2H3D/HIST1H1B/HIST2H2BE/NAP1L1/HIST1H1T/HIST1H1C/IPO4/HIST1H4C/HIST1H3J/HIST1H4J/HIST1H3D/HIST1H2BK/HIST2H3C/HIST2H2BF/HIST2H3A/DAXX/NAP1L4/HIST1H2BN/HIST2H4B/HIST1H4K/HIST1H2BM/HIST1H2BG/HIST1H3B/HIST1H2BE/HIST1H2BO/HIST1H3E/HIST1H4L/HIST1H3I/HI…	58
BP	GO:0065004	protein-DNA complex assembly	64/2711	189/16266	5.42702e-09	4.7405e-06	RNF4/TAF2/KAT6A/CABIN1/CENPI/ASF1B/RAD51C/RPA2/SET/NAA60/HIST1H1D/HIST1H2BJ/RPA1/POGZ/HIST1H2BA/CENPU/HIST1H2BD/HIST1H4H/CENPN/HIST3H3/HIST1H1E/STRA13/WNT10B/HIST1H2BC/RAD51B/HIST2H3D/HIST1H1B/HIST2H2BE/NAP1L1/HIST1H1T/HIST1H1C/IPO4/HIST1H4C/HIST1H3J/HIST1H4J/HIST1H3D/HIST1H2BK/HIST2H3C/HIST2H2BF/HIST2H3A/DAXX/NAP1L4/HIST1H2BN/HIST2H4B/HIST1H4K/HIST1H2BM/HIST1H2BG/HIST1H3B/HIST1H2BE/HIST1H2BO/HIS…	64
BP	GO:0006335	DNA replication-dependent nucleosome assembly	20/2711	32/16266	7.45796e-09	4.88589e-06	ASF1B/HIST1H4H/IPO4/HIST1H4C/HIST1H3J/HIST1H4J/HIST1H3D/HIST2H4B/HIST1H4K/HIST1H3B/HIST1H3E/HIST1H4L/HIST1H3I/HIST1H3A/HIST1H4D/HIST1H3F/HIST1H3C/HIST1H4A/HIST1H4B/HIST1H3H	20
BP	GO:0034723	DNA replication-dependent nucleosome organization	20/2711	32/16266	7.45796e-09	4.88589e-06	ASF1B/HIST1H4H/IPO4/HIST1H4C/HIST1H3J/HIST1H4J/HIST1H3D/HIST2H4B/HIST1H4K/HIST1H3B/HIST1H3E/HIST1H4L/HIST1H3I/HIST1H3A/HIST1H4D/HIST1H3F/HIST1H3C/HIST1H4A/HIST1H4B/HIST1H3H	20
BP	GO:0006333	chromatin assembly or disassembly	61/2711	179/16266	9.3621e-09	5.45186e-06	TPR/KAT6A/CABIN1/CENPI/ASF1B/SET/NAA60/NFE2/HIST1H1D/HIST1H2BJ/HMGA1/HIST1H2BA/TLK2/CENPU/HIST1H2BD/HIST1H4H/CENPN/HIST3H3/HIST1H1E/STRA13/HIST1H2BC/HIST3H2A/HIST2H3D/HIST1H1B/HIST2H2BE/NAP1L1/HIST1H1T/HIST1H1C/IPO4/HIST1H4C/HIST1H3J/HIST1H4J/HIST1H3D/HIST1H2BK/TLK1/HIST2H3C/HIST2H2BF/HIST2H3A/DAXX/NAP1L4/HIST1H2BN/HIST2H4B/HIST1H4K/HIST1H2BM/HIST1H2BG/HIST1H3B/HIST1H2BE/HIST1H2BO/HIST1H3E/HIST1H…	61
BP	GO:0071824	protein-DNA complex subunit organization	68/2711	216/16266	5.06616e-08	2.65517e-05	RNF4/TAF2/KAT6A/CABIN1/CENPI/ASF1B/RAD51C/RPA2/SET/NAA60/NFE2/HIST1H1D/HIST1H2BJ/RPA1/HMGA1/POGZ/HIST1H2BA/CENPU/GTF2E1/HIST1H2BD/HIST1H4H/CENPN/HIST3H3/HIST1H1E/STRA13/WNT10B/HIST1H2BC/HIST3H2A/RAD51B/HIST2H3D/HIST1H1B/HIST2H2BE/NAP1L1/HIST1H1T/HIST1H1C/IPO4/HIST1H4C/HIST1H3J/HIST1H4J/HIST1H3D/HIST1H2BK/HIST2H3C/HIST2H2BF/HIST2H3A/DAXX/NAP1L4/HIST1H2BN/HIST2H4B/HIST1H4K/HIST1H2BM/HIST1H2BG/HIST1…	68
BP	GO:0000183	chromatin silencing at rDNA	23/2711	44/16266	6.34919e-08	3.0251e-05	SIRT1/TBP/HIST1H4H/HIST2H3D/HIST1H4C/HIST1H3J/HIST1H4J/HIST1H3D/HIST2H3C/HIST2H3A/HIST2H4B/HIST1H4K/HIST1H3B/HIST1H3E/HIST1H4L/HIST1H3I/HIST1H3A/HIST1H4D/HIST1H3F/HIST1H3C/HIST1H4A/HIST1H4B/HIST1H3H	23
BP	GO:0006323	DNA packaging	61/2711	189/16266	9.0223e-08	3.94049e-05	TPR/KAT6A/SRPK1/CABIN1/CENPI/ASF1B/SET/NAA60/HIST1H1D/HIST1H2BJ/TOP2A/HMGA1/HIST1H2BA/CENPU/HIST1H2BD/HIST1H4H/GPER1/CENPN/HIST3H3/HIST1H1E/DFFB/STRA13/HIST1H2BC/HIST2H3D/HIST1H1B/HIST2H2BE/NAP1L1/HIST1H1T/HIST1H1C/IPO4/HIST1H4C/HIST1H3J/HIST1H4J/HIST1H3D/HIST1H2BK/HIST2H3C/HIST2H2BF/HIST2H3A/DAXX/NAP1L4/HIST1H2BN/HIST2H4B/HIST1H4K/HIST1H2BM/HIST1H2BG/HIST1H3B/HIST1H2BE/HIST1H2BO/HIST1H3E/HIST1H4…	61
BP	GO:0051290	protein heterotetramerization	19/2711	35/16266	4.12098e-07	0.000166139	HIST1H4H/HIST3H3/HIST1H4C/HIST1H3J/HIST1H4J/HIST1H3D/HIST2H4B/HIST1H4K/HIST1H3B/HIST1H3E/HIST1H4L/HIST1H3I/HIST1H3A/HIST1H4D/HIST1H3F/HIST1H3C/HIST1H4A/HIST1H4B/HIST1H3H	19
BP	GO:0071103	DNA conformation change	72/2711	249/16266	8.48309e-07	0.00031757	DDX11/TPR/XRCC5/KAT6A/SRPK1/CABIN1/TOP3B/MCM5/CENPI/ASF1B/SET/ZRANB3/NAA60/HIST1H1D/HIST1H2BJ/TOP2A/BRIP1/HMGA1/HIST1H2BA/CENPU/HHEX/HIST1H2BD/HIST1H4H/GPER1/CENPN/HIST3H3/HIST1H1E/DFFB/STRA13/CHD2/HIST1H2BC/HIST2H3D/HIST1H1B/TOP1MT/HIST2H2BE/NAP1L1/HIST1H1T/HIST1H1C/IPO4/HIST1H4C/HIST1H3J/HIST1H4J/RAD54B/HIST1H3D/HIST1H2BK/HIST2H3C/HIST2H2BF/HIST2H3A/DAXX/NAP1L4/DDX3X/HIST1H2BN/HIST2H4B/HIST1H4K…	72
BP	GO:0001525	angiogenesis	105/2711	411/16266	2.41872e-06	0.0008451	CX3CL1/TYMP/BAK1/PNPLA6/FLT4/FOXC1/HDAC7/CASP8/JMJD6/PTGS2/FGFR1/FAP/EDN1/NRCAM/SIRT1/NFATC4/KLF5/FLT1/RGCC/RASIP1/TSPAN12/C1GALT1/ENG/CCL2/ELK3/FGF6/VEGFA/SPARC/PDGFRB/IL1A/ACVR1/PDCL3/F3/TNFAIP3/ITGB1BP1/PGF/TGFBI/PTK2B/NPPB/ADGRB2/CCR2/RAMP3/PLAU/NR4A1/PTGIS/IL1B/PTPRB/LIF/ARHGAP22/E2F8/ANGPTL6/RAMP2/PDGFRA/ETS1/MAP3K7/IL6/CYP1B1/ARHGAP24/FGF2/ANXA3/LEF1/WARS/MFGE8/BCAS3/ERBB2/EPHA2/COL8A1/SLI…	105
BP	GO:0048514	blood vessel morphogenesis	120/2711	489/16266	4.09776e-06	0.00134227	CX3CL1/TYMP/BAK1/PNPLA6/FLT4/FOXC1/HDAC7/CASP8/JMJD6/PTGS2/TEAD2/FGFR1/FAP/EDN1/KAT6A/WNT11/NRCAM/SIRT1/NFATC4/KLF5/FLT1/RGCC/NPRL3/RASIP1/TSPAN12/C1GALT1/ENG/CCL2/RAPGEF2/ELK3/FGF6/QKI/VEGFA/SPARC/PDGFRB/IL1A/ACVR1/PDCL3/F3/PROX1/TNFAIP3/ITGB1BP1/PGF/TGFBI/PTK2B/NPPB/ADGRB2/CCR2/RAMP3/PLAU/NR4A1/PTGIS/IL1B/CITED1/SIX1/PTPRB/LIF/ARHGAP22/E2F8/ANGPTL6/RAMP2/PDGFRA/ETS1/MAP3K7/IL6/STRA6/CYP1B1/ARHG…	120
BP	GO:0035239	tube morphogenesis	94/2711	366/16266	6.35288e-06	0.00195855	CD44/BAK1/CASP8/PRKACA/TEAD2/EDN1/PSEN1/TCF7/MEF2C/WNT11/PTHLH/KDM2B/PXN/MTHFD1/NFATC4/NDRG4/RASIP1/ENG/DVL1/AREG/GLI1/VDR/PTK7/VEGFA/FOXP1/ACVR1/WNT6/ITGB1BP1/PGF/LIAS/FOXA2/BMP2/CITED1/SIX1/HOXD11/HOXD13/MICAL2/PDGFRA/MAP3K7/SPRY2/MYC/STRA6/FGF2/LEF1/PRICKLE1/BCAS3/CCDC40/SMAD4/EPHA2/PRKACB/OSR1/SLIT2/ADAMTS16/KDM6A/NFIB/HHEX/BCL2L11/ENAH/KIF26B/SPRY1/PITX2/SOX17/DLC1/FZD6/RET/SPINT1/ILK/GREM1/…	94
BP	GO:0030335	positive regulation of cell migration	89/2711	344/16266	8.13319e-06	0.00231645	CX3CL1/FLT4/KITLG/HDAC7/PTGS2/FBLN1/EDN1/CXCL2/WNT11/NOX4/PPM1F/ARHGAP5/ARHGEF7/FLT1/FBXO31/RAB11A/CEMIP/RPS6KB1/CCL2/RAPGEF2/GLI1/GCNT2/VEGFA/HBEGF/SPARC/IL4/PDGFRB/FOXP1/CCL20/F3/PROX1/ITGB1BP1/CD274/TNFSF18/PTK2B/CCR2/PLAU/ATP8A1/IL1B/BMP2/RAC2/NUMB/ELP3/PDGFRA/ETS1/APC/ACVR1B/IL6/TLR2/RDX/ADAM10/SEMA6D/FGF2/ANXA3/LEF1/NTRK3/BCAS3/AKT1/CXCL14/TIRAP/ANGPT1/FGF18/IL6R/CXCL16/CLASP2/CXCL3/CXCL1/E…	89
BP	GO:0045814	negative regulation of gene expression, epigenetic	49/2711	160/16266	8.39773e-06	0.00231645	MSL3/MNAT1/ARID4B/SIRT1/GTF2H3/TBP/DNMT3A/CDK7/HMGA1/HIST1H4H/H2AFZ/HIST1H2AA/MECP2/SIN3A/HIST3H2A/HIST2H3D/HIST2H2AC/HIST2H2AB/MORF4L1/HIST1H2AI/HIST1H2AG/HIST1H4C/HIST1H3J/HIST1H4J/HIST1H3D/HIST2H3C/HIST2H2AA3/HIST2H3A/MBD3L2/HIST2H4B/HIST2H2AA4/HIST1H4K/HIST1H3B/HIST1H3E/HIST1H2AH/HIST1H4L/HIST1H2AK/HIST1H3I/HIST1H3A/HIST1H2AL/HIST1H2AE/HIST1H4D/HIST1H3F/HIST1H3C/HIST1H2AB/HIST1H4A/HIST1H2AM/H…	49
BP	GO:0060562	epithelial tube morphogenesis	85/2711	326/16266	9.37075e-06	0.00244508	CD44/BAK1/CASP8/PRKACA/TEAD2/EDN1/PSEN1/MEF2C/WNT11/PTHLH/KDM2B/PXN/MTHFD1/NFATC4/NDRG4/RASIP1/ENG/DVL1/AREG/VDR/PTK7/VEGFA/FOXP1/ACVR1/WNT6/PGF/LIAS/FOXA2/BMP2/CITED1/SIX1/HOXD11/MICAL2/MAP3K7/SPRY2/MYC/FGF2/LEF1/PRICKLE1/CCDC40/SMAD4/EPHA2/PRKACB/OSR1/SLIT2/ADAMTS16/KDM6A/HHEX/ENAH/KIF26B/SPRY1/PITX2/SOX17/DLC1/FZD6/RET/SPINT1/ILK/GREM1/COQ7/SPINT2/C2CD3/CTNNB1/RBPJ/SEMA4C/ARL13B/LUZP1/BCL2/DAG…	85
BP	GO:0006305	DNA alkylation	31/2711	86/16266	1.095e-05	0.00244508	KMT2E/GNAS/PRMT5/DNMT3A/CTCFL/GATAD2B/HIST1H4H/TDRD12/EHMT1/TDRKH/HIST2H3D/TET3/HIST1H4C/HIST1H3J/HIST1H4J/HIST1H3D/HIST2H3C/HIST2H3A/HIST2H4B/HIST1H4K/HIST1H3B/HIST1H3E/HIST1H4L/HIST1H3I/HIST1H3A/HIST1H4D/HIST1H3F/HIST1H3C/HIST1H4A/HIST1H4B/HIST1H3H	31
BP	GO:0006306	DNA methylation	31/2711	86/16266	1.095e-05	0.00244508	KMT2E/GNAS/PRMT5/DNMT3A/CTCFL/GATAD2B/HIST1H4H/TDRD12/EHMT1/TDRKH/HIST2H3D/TET3/HIST1H4C/HIST1H3J/HIST1H4J/HIST1H3D/HIST2H3C/HIST2H3A/HIST2H4B/HIST1H4K/HIST1H3B/HIST1H3E/HIST1H4L/HIST1H3I/HIST1H3A/HIST1H4D/HIST1H3F/HIST1H3C/HIST1H4A/HIST1H4B/HIST1H3H	31
BP	GO:0051272	positive regulation of cellular component movement	92/2711	361/16266	1.10839e-05	0.00244508	CX3CL1/FLT4/KITLG/HDAC7/CFAP20/PTGS2/FBLN1/EDN1/CXCL2/WNT11/NOX4/PPM1F/ARHGAP5/ARHGEF7/FLT1/FBXO31/RAB11A/CEMIP/RPS6KB1/CCL2/RAPGEF2/GLI1/GCNT2/VEGFA/HBEGF/SPARC/IL4/PDGFRB/FOXP1/CCL20/F3/STMN1/PROX1/ITGB1BP1/CD274/TNFSF18/PTK2B/CCR2/PLAU/ATP8A1/IL1B/BMP2/RAC2/NUMB/ELP3/PDGFRA/ETS1/APC/ACVR1B/IL6/TLR2/RDX/ADAM10/SEMA6D/FGF2/ANXA3/LEF1/NTRK3/BCAS3/AKT1/CXCL14/TIRAP/ANGPT1/FGF18/IL6R/CXCL16/CLASP2/…	92
BP	GO:0030099	myeloid cell differentiation	87/2711	337/16266	1.11967e-05	0.00244508	KMT2E/PAFAH1B1/KITLG/CASP8/SBNO2/JMJD6/ACTN1/PSEN1/MEF2C/NFE2L1/KAT6A/ADD1/GNAS/MAEA/THPO/IL11/RBFOX2/NFKBIA/RELB/INPP4B/SOX6/VEGFA/IL4/SMAD5/FOXP1/GPR68/PTK2B/FAM213A/INHBA/PRMT1/STAT5A/LIF/PPARG/CDC73/ETS1/APC/ACVR1B/TLR4/MYC/TMOD3/LEF1/WDR61/NCOR1/EPHA2/PSEN2/OGT/TIRAP/FLI1/HHEX/CEBPG/KLF10/HIST1H4H/ALAS2/C1QC/RUNX1/ZNF385A/GFI1/IFI16/CASP3/CSF2/SFXN1/IL31RA/DCSTAMP/CTNNB1/BATF2/RBPJ/PIK3CD/TR…	87
BP	GO:0002009	morphogenesis of an epithelium	113/2711	465/16266	1.24439e-05	0.00260874	WNT16/PAFAH1B1/CD44/BAK1/CASP8/PRKACA/TEAD2/NTN4/FGFR1/EDN1/PSEN1/MEF2C/WNT11/PTHLH/KDM2B/PXN/MTHFD1/NFATC4/NDRG4/RASIP1/PLOD3/ENG/DVL1/AREG/VDR/PTK7/VEGFA/TBX18/HBEGF/FOXP1/ACVR1/WNT6/PROX1/PGF/LIAS/FOXA2/BMP2/CITED1/STAT5A/SIX1/LIF/HOXD11/HOXD13/KLK14/GRSF1/MICAL2/NUMB/MAP3K7/PCDH8/SPRY2/IL6/MYC/ARHGAP24/FGF2/LEF1/PRICKLE1/KRT71/CCDC40/SMAD4/EPHA2/PRKACB/OSR1/SLIT2/ADAMTS16/KDM6A/HHEX/ENAH/RHOC…	113
BP	GO:2000147	positive regulation of cell motility	90/2711	353/16266	1.35048e-05	0.00272225	CX3CL1/FLT4/KITLG/HDAC7/CFAP20/PTGS2/FBLN1/EDN1/CXCL2/WNT11/NOX4/PPM1F/ARHGAP5/ARHGEF7/FLT1/FBXO31/RAB11A/CEMIP/RPS6KB1/CCL2/RAPGEF2/GLI1/GCNT2/VEGFA/HBEGF/SPARC/IL4/PDGFRB/FOXP1/CCL20/F3/PROX1/ITGB1BP1/CD274/TNFSF18/PTK2B/CCR2/PLAU/ATP8A1/IL1B/BMP2/RAC2/NUMB/ELP3/PDGFRA/ETS1/APC/ACVR1B/IL6/TLR2/RDX/ADAM10/SEMA6D/FGF2/ANXA3/LEF1/NTRK3/BCAS3/AKT1/CXCL14/TIRAP/ANGPT1/FGF18/IL6R/CXCL16/CLASP2/CXCL3/…	90
BP	GO:0097194	execution phase of apoptosis	33/2711	95/16266	1.42105e-05	0.00275841	VIM/CDH1/CASP8/FAP/PKP1/ADD1/DNM1L/RFFL/CDK5RAP3/BIRC2/TJP2/TARDBP/PTGIS/TOP2A/DSG1/APC/AKT1/CAPN10/LMNA/CASP3/DLC1/GPER1/BLCAP/CTNNB1/PTK2/DFFB/RNF34/BCL2L1/CYCS/PAK2/AIFM3/MAPT/OCLN	33
BP	GO:0070741	response to interleukin-6	15/2711	29/16266	1.51625e-05	0.0028381	SBNO2/CCL2/NFKB1/MYB/PTGIS/FOXA2/CITED1/IL6ST/IL6/SMAD4/IL6R/GFI1/PHB/STAT3/RELA	15
BP	GO:0016458	gene silencing	54/2711	186/16266	1.67826e-05	0.00303303	MSL3/SCMH1/SIRT1/SOX6/CNOT2/TBP/DNMT3A/HMGA1/CELF1/CNOT8/HIST1H4H/H2AFZ/HIST1H2AA/MECP2/SIN3A/SMAD1/TDRD12/PRKRA/HIST3H2A/TDRKH/HIST2H3D/HIST2H2AC/HIST2H2AB/MORF4L1/HIST1H2AI/HIST1H2AG/HIST1H4C/HIST1H3J/HIST1H4J/HIST1H3D/HIST2H3C/HIST2H2AA3/HIST2H3A/MBD3L2/HIST2H4B/HIST2H2AA4/HIST1H4K/HIST1H3B/HIST1H3E/HIST1H2AH/HIST1H4L/HIST1H2AK/HIST1H3I/HIST1H3A/HIST1H2AL/HIST1H2AE/HIST1H4D/HIST1H3F/HIST1H3C/H…	54
BP	GO:0040017	positive regulation of locomotion	93/2711	370/16266	1.79406e-05	0.00313422	CX3CL1/FLT4/KITLG/HDAC7/CFAP20/PTGS2/FBLN1/EDN1/CXCL2/WNT11/NOX4/PPM1F/ARHGAP5/ARHGEF7/FLT1/FBXO31/RAB11A/CEMIP/RPS6KB1/CCL2/RAPGEF2/GLI1/GCNT2/VEGFA/HBEGF/SPARC/IL4/PDGFRB/FOXP1/CCL20/ARTN/F3/PROX1/ITGB1BP1/CD274/TNFSF18/PTK2B/CCR2/PLAU/ATP8A1/IL1B/BMP2/RAC2/NUMB/ELP3/PDGFRA/ETS1/APC/ACVR1B/IL6/TLR2/RDX/ADAM10/SEMA6D/FGF2/ANXA3/LEF1/NTRK3/BCAS3/AKT1/SLIT2/CXCL14/TIRAP/ANGPT1/FGF18/IL6R/CXCL16/CL…	93
BP	GO:0045927	positive regulation of growth	63/2711	230/16266	2.62753e-05	0.00444223	CD38/PAFAH1B1/CACNA2D2/ACSL4/FGFR1/MEF2C/TAF9/CAPN3/PPM1F/ADNP/PSMD10/RAB11A/LIMK1/RPS6KB1/PPARD/VEGFA/HBEGF/RPS6KA1/PROX1/SERP1/PLS1/PTK2B/ZNF639/EXOSC9/STAT5A/MACF1/EXOSC2/ADAM10/SEMA7A/FGF2/LEF1/NTRK3/ERBB2/AKT1/CPNE9/IGFBP1/CELF1/PPP1R1C/NRG1/CXCL16/DISC1/ILK/RBPJ/WNT10B/HOPX/BCL2/SPHK1/BDNF/RPS6KA3/IST1/PLCB1/HIST1H1B/CSF1/WT1/MAPT/SHTN1/SEMA4D/AGRN/NACA/NOL8/ITSN2/SLC44A4/DDX3X	63
BP	GO:0071354	cellular response to interleukin-6	13/2711	24/16266	2.98695e-05	0.0047446	SBNO2/CCL2/NFKB1/MYB/PTGIS/IL6ST/IL6/SMAD4/IL6R/GFI1/PHB/STAT3/RELA	13
BP	GO:0006304	DNA modification	38/2711	119/16266	2.98744e-05	0.0047446	KMT2E/GNAS/PRMT5/APEX1/MPG/DNMT3A/CTCFL/MUTYH/ASCC1/TDG/NEIL1/GATAD2B/HIST1H4H/TDRD12/EHMT1/TDRKH/HIST2H3D/TET3/HIST1H4C/HIST1H3J/HIST1H4J/HIST1H3D/HIST2H3C/HIST2H3A/APOBEC3D/HIST2H4B/HIST1H4K/HIST1H3B/HIST1H3E/HIST1H4L/HIST1H3I/HIST1H3A/HIST1H4D/HIST1H3F/HIST1H3C/HIST1H4A/HIST1H4B/HIST1H3H	38
BP	GO:2001234	negative regulation of apoptotic signaling pathway	56/2711	199/16266	3.16844e-05	0.00488406	GCLC/CFLAR/CX3CL1/FYN/PLAUR/CD44/HERPUD1/MNT/PSEN1/TAF9/ITGA6/ZC3HC1/RFFL/SIRT1/PSMD10/RPS6KB1/BMP5/IL4/IL1A/ACVR1/NFE2L2/PARK7/KIAA1324/IVNS1ABP/TNFAIP3/CLU/IL1B/PSME3/FIGNL1/TPT1/MAP3K7/TMBIM1/IER3/ARRB2/AKT1/IL19/PSEN2/TCF7L2/PGAP2/NRG1/LMNA/ZNF385A/SYVN1/CSF2/BAG5/CTNNB1/RNF34/BCL2L1/BCL2/RELA/PARL/MUC1/SRC/DDX3X/MAGEA3/PCGF2	56
BP	GO:0044728	DNA methylation or demethylation	33/2711	99/16266	3.72587e-05	0.00557923	KMT2E/GNAS/PRMT5/APEX1/DNMT3A/CTCFL/TDG/GATAD2B/HIST1H4H/TDRD12/EHMT1/TDRKH/HIST2H3D/TET3/HIST1H4C/HIST1H3J/HIST1H4J/HIST1H3D/HIST2H3C/HIST2H3A/HIST2H4B/HIST1H4K/HIST1H3B/HIST1H3E/HIST1H4L/HIST1H3I/HIST1H3A/HIST1H4D/HIST1H3F/HIST1H3C/HIST1H4A/HIST1H4B/HIST1H3H	33
BP	GO:0030307	positive regulation of cell growth	42/2711	138/16266	4.22662e-05	0.00615326	CD38/PAFAH1B1/ACSL4/TAF9/ADNP/PSMD10/RAB11A/LIMK1/VEGFA/HBEGF/RPS6KA1/PTK2B/ZNF639/EXOSC9/MACF1/EXOSC2/ADAM10/SEMA7A/LEF1/NTRK3/ERBB2/AKT1/CPNE9/IGFBP1/PPP1R1C/NRG1/CXCL16/DISC1/ILK/BCL2/SPHK1/BDNF/RPS6KA3/IST1/HIST1H1B/MAPT/SHTN1/SEMA4D/NOL8/ITSN2/SLC44A4/DDX3X	42
BP	GO:0051962	positive regulation of nervous system development	98/2711	408/16266	7.4e-05	0.010482	CX3CL1/PAFAH1B1/PAX6/FYN/CAMK2B/LTK/PPP2R5B/FGFR1/XRCC5/PSEN1/MEF2C/LHX5/NRCAM/PRMT5/ADNP/OXT/NDRG4/FBXO31/RAB11A/NUMBL/CRTC1/SCN1B/LIMK1/DVL1/NEURL1/RAPGEF2/CAPRIN2/GLI1/CUX2/BMP5/PTK7/VEGFA/EIF4G1/PROX1/TGIF2/PTK2B/ADGRB2/CXCR4/IL1B/FOXA2/NKX2-2/BMP2/FLRT3/MACF1/LIF/PPARG/NUMB/KIDINS220/IL6ST/CAPRIN1/IL6/BIN1/SEMA7A/AMIGO2/NTRK3/CPNE9/SLIT2/ANKRD1/PTPRD/NRG1/GDPD5/NBL1/SHANK1/DISC1/PLXNB1/GPER1…	98
BP	GO:0006921	cellular component disassembly involved in execution phase of apoptosis	25/2711	70/16266	9.00584e-05	0.012421	VIM/CDH1/CASP8/PKP1/ADD1/DNM1L/CDK5RAP3/BIRC2/TJP2/TARDBP/TOP2A/DSG1/APC/CAPN10/LMNA/CASP3/GPER1/BLCAP/CTNNB1/PTK2/DFFB/CYCS/PAK2/MAPT/OCLN	25
BP	GO:0000723	telomere maintenance	30/2711	91/16266	0.000103734	0.0139154	ERCC1/POLD1/SMG6/XRCC5/RIF1/APEX1/ACD/RFC5/RPA2/RPA1/TERF2/MYC/NHP2/DCLRE1C/NSMCE2/HIST1H4H/RFC4/CTNNB1/HIST3H3/DHX36/POLD4/SLX1B/HIST1H4C/HIST1H4J/HIST2H4B/HIST1H4K/HIST1H4L/HIST1H4D/HIST1H4A/HIST1H4B	30
BP	GO:0016049	cell growth	106/2711	452/16266	0.000106204	0.0139154	CD38/IFRD1/PAFAH1B1/TRO/ACSL4/IP6K2/RASGRP2/ENO1/DGKD/JADE1/EDN1/SMARCA2/EPB41L3/TAF9/WNT11/NRCAM/DPYSL2/SIRT1/ADNP/PSMD10/NDRG4/RAB11A/SGK3/LIMK1/DVL1/DDX5/TMEM97/CAPRIN2/VEGFA/HBEGF/ATP6V0E1/CISH/RTN4/RPS6KA1/SGK1/SOCS2/PTK2B/NPPB/ZNF639/INHBA/EXOSC9/CDKN1A/FLRT3/MACF1/SHBG/FGF13/PAK4/EXOSC2/PPARG/PSRC1/ACVR1B/IL6/ADAM10/SEMA7A/LEF1/NTRK3/SMAD4/ERBB2/AKT1/EMP3/CPNE9/SLIT2/IGFBP1/EI24/PPP1R1C/NR…	106
BP	GO:2001236	regulation of extrinsic apoptotic signaling pathway	45/2711	157/16266	0.000113775	0.0144929	GCLC/CFLAR/CX3CL1/FYN/BID/TRAF1/CASP8/FGFR1/CYLD/ITGA6/ZC3HC1/RFFL/SRPX/TRPS1/RPS6KB1/BMP5/IL4/IL1A/ACVR1/PARK7/KIAA1324/TNFAIP3/INHBA/G0S2/IL1B/PSME3/TMBIM1/AKT1/IL19/PSEN2/TCF7L2/NRG1/LMNA/CSF2/GPER1/RET/TMC8/RNF34/BCL2L1/BCL2/RELA/PAK2/WWOX/SRC/ACSL5	45
BP	GO:0050769	positive regulation of neurogenesis	85/2711	348/16266	0.000118308	0.0144929	CX3CL1/PAFAH1B1/PAX6/FYN/CAMK2B/LTK/PPP2R5B/FGFR1/XRCC5/PSEN1/MEF2C/NRCAM/PRMT5/ADNP/NDRG4/FBXO31/RAB11A/NUMBL/CRTC1/SCN1B/LIMK1/DVL1/NEURL1/RAPGEF2/CAPRIN2/CUX2/BMP5/PTK7/VEGFA/EIF4G1/PROX1/TGIF2/PTK2B/CXCR4/IL1B/FOXA2/NKX2-2/BMP2/MACF1/LIF/PPARG/NUMB/KIDINS220/IL6ST/CAPRIN1/IL6/BIN1/SEMA7A/NTRK3/CPNE9/SLIT2/ANKRD1/PTPRD/GDPD5/NBL1/SHANK1/DISC1/PLXNB1/GPER1/RET/NSMF/ILK/CTNNB1/ENC1/BCL2/RELA/VWC…	85
BP	GO:0001763	morphogenesis of a branching structure	56/2711	208/16266	0.000118907	0.0144929	CD44/BAK1/NTN4/FGFR1/EDN1/PXN/NFATC4/RASIP1/ENG/AREG/VDR/VEGFA/ACVR1/RTN4/WNT6/PROX1/PGF/IL1B/FOXA2/BMP2/CITED1/SIX1/HOXD11/HOXD13/SPRY2/IL6/MYC/FGF2/LEF1/SMAD4/RERE/EPHA2/SLIT2/ADAMTS16/HHEX/HOXB13/SPRY1/PITX2/SPINT1/FRS2/ILK/GREM1/SPINT2/CTNNB1/BCL2/DAG1/ETV4/CSF1/WT1/COL4A1/WNT7B/SRC/PDGFA/COL13A1/DDR1/ETV5	56
BP	GO:2001237	negative regulation of extrinsic apoptotic signaling pathway	30/2711	92/16266	0.000129683	0.0154471	GCLC/CFLAR/CX3CL1/FYN/ITGA6/ZC3HC1/RFFL/RPS6KB1/BMP5/IL4/IL1A/ACVR1/PARK7/KIAA1324/TNFAIP3/IL1B/PSME3/TMBIM1/AKT1/IL19/PSEN2/TCF7L2/NRG1/LMNA/CSF2/RNF34/BCL2L1/BCL2/RELA/SRC	30
BP	GO:0032200	telomere organization	30/2711	93/16266	0.000161296	0.0187856	ERCC1/POLD1/SMG6/XRCC5/RIF1/APEX1/ACD/RFC5/RPA2/RPA1/TERF2/MYC/NHP2/DCLRE1C/NSMCE2/HIST1H4H/RFC4/CTNNB1/HIST3H3/DHX36/POLD4/SLX1B/HIST1H4C/HIST1H4J/HIST2H4B/HIST1H4K/HIST1H4L/HIST1H4D/HIST1H4A/HIST1H4B	30
BP	GO:1901533	negative regulation of hematopoietic progenitor cell differentiation	12/2711	24/16266	0.000167499	0.0190839	NFE2L2/PRMT1/HIST1H4H/MIXL1/HIST1H4C/HIST1H4J/HIST2H4B/HIST1H4K/HIST1H4L/HIST1H4D/HIST1H4A/HIST1H4B	12
BP	GO:0045653	negative regulation of megakaryocyte differentiation	10/2711	18/16266	0.000194016	0.0216349	PRMT1/HIST1H4H/HIST1H4C/HIST1H4J/HIST2H4B/HIST1H4K/HIST1H4L/HIST1H4D/HIST1H4A/HIST1H4B	10
BP	GO:0010769	regulation of cell morphogenesis involved in differentiation	73/2711	294/16266	0.000204339	0.0219233	IFRD1/PAFAH1B1/CAMK2B/FBLN1/PSEN1/SSH1/NRCAM/DPYSL2/NFATC4/ADNP/PQBP1/ARHGEF7/RGCC/FBXO31/RAB11A/LIMK1/RAPGEF2/CORO1C/CAPRIN2/CUX2/GCNT2/BMP5/VEGFA/GORASP1/RTN4/ITGB1BP1/FOXA2/BMP2/CITED1/MACF1/LIF/FGF13/CAPRIN1/SEMA7A/LEF1/PPP3CA/NTRK3/SSH2/SMAD4/SLIT2/TCF7L2/LRRC4C/PTPRO/PTPRD/DISC1/PDLIM5/ARPC2/CLASP2/PLXNB1/RET/NSMF/ILK/GREM1/SDHAF2/CTNNB1/PTK2/CDH2/HAS2/FAM21C/DAG1/BAIAP2/BDNF/ALX1/IST1/MAPT…	73
BP	GO:0010720	positive regulation of cell development	102/2711	439/16266	0.000204969	0.0219233	CX3CL1/PAFAH1B1/PAX6/FYN/CAMK2B/LTK/PPP2R5B/FGFR1/EDN1/XRCC5/PSEN1/MEF2C/NRCAM/PRMT5/ADNP/ARHGEF7/RGCC/NDRG4/FBXO31/RAB11A/NUMBL/CRTC1/SCN1B/LIMK1/DVL1/NEURL1/RAPGEF2/CAPRIN2/CUX2/VDR/GCNT2/BMP5/PTK7/VEGFA/EIF4G1/PROX1/TGIF2/GPR68/PTK2B/CXCR4/IL1B/FOXA2/NKX2-2/BMP2/MACF1/LIF/HOXD11/PPARG/NUMB/KIDINS220/IL6ST/CAPRIN1/IL6/BIN1/SEMA7A/LEF1/NTRK3/SMAD4/CPNE9/SLIT2/ANKRD1/TCF7L2/PTPRD/GDPD5/NBL1/RUNX1…	102
BP	GO:0050808	synapse organization	55/2711	208/16266	0.000225289	0.0228881	ALS2/CACNA2D2/CDH1/CAMK2B/MEF2C/NRCAM/NFATC4/ADNP/OXT/DVL1/NEURL1/CUX2/MDGA1/ADGRB2/FLRT3/SIX1/ZC4H2/LRRC4/DLG4/AMIGO2/NTRK3/ERBB2/GPM6A/PTPRD/NRG1/RER1/SHANK1/SHANK2/NFIA/DISC1/PDLIM5/CTNNB1/MECP2/PTK2/CHRNB1/CDH2/GPHN/SNCG/SPTBN2/BDNF/SLITRK1/SLITRK4/NRXN1/THBS2/MAGI2/COL4A1/WNT7B/AGRN/RELN/MYO6/NTRK1/SLC9A6/ELFN1/ETV5/PCDHB16	55
BP	GO:0022604	regulation of cell morphogenesis	109/2711	476/16266	0.000228993	0.0228881	IFRD1/PAFAH1B1/FYN/VRK2/CAMK2B/FERMT2/FBLN1/PSEN1/EPB41L3/CYLD/SSH1/PXN/NRCAM/DPYSL2/NFATC4/ADNP/PQBP1/ARHGEF7/RGCC/FBXO31/RAB11A/LIMK1/CCL2/RAPGEF2/CORO1C/CAPRIN2/CUX2/GCNT2/BMP5/VEGFA/SPARC/GORASP1/RTN4/MYL12B/ITGB1BP1/PTK2B/WIPF3/FOXA2/BMP2/CITED1/MACF1/CDC42EP1/LIF/FGF13/CAMSAP1/MYH10/CAPRIN1/IL6/ODF2/RDX/SEMA7A/LEF1/PPP3CA/NTRK3/SSH2/SMAD4/CPNE9/SLIT2/ADAMTS16/TBC1D7/ZMYM3/TCF7L2/LRRC4C/ALDO…	109
BP	GO:0061138	morphogenesis of a branching epithelium	52/2711	194/16266	0.000229836	0.0228881	CD44/BAK1/NTN4/FGFR1/EDN1/PXN/NFATC4/RASIP1/ENG/AREG/VDR/VEGFA/ACVR1/WNT6/PROX1/PGF/FOXA2/BMP2/CITED1/SIX1/HOXD11/HOXD13/SPRY2/IL6/MYC/FGF2/LEF1/SMAD4/EPHA2/SLIT2/ADAMTS16/HHEX/HOXB13/SPRY1/PITX2/SPINT1/FRS2/ILK/GREM1/SPINT2/CTNNB1/BCL2/DAG1/ETV4/CSF1/WT1/COL4A1/WNT7B/SRC/PDGFA/DDR1/ETV5	52
BP	GO:0045652	regulation of megakaryocyte differentiation	13/2711	28/16266	0.000231458	0.0228881	MEF2C/THPO/PRMT1/HIST1H4H/HIST1H4C/HIST1H4J/HIST2H4B/HIST1H4K/HIST1H4L/RAB7B/HIST1H4D/HIST1H4A/HIST1H4B	13
BP	GO:2001233	regulation of apoptotic signaling pathway	90/2711	380/16266	0.000239158	0.0232116	GCLC/CFLAR/CX3CL1/FYN/PLAUR/BID/CD44/BAK1/HERPUD1/TRAF1/CAMK2B/CASP8/MNT/FGFR1/PSEN1/CYLD/TAF9/DNM1L/ITGA6/ZC3HC1/RFFL/SIRT1/NFATC4/PSMD10/SRPX/TRPS1/SEPT4/RPS6KB1/TPD52L1/BMP5/IL4/IL1A/ACVR1/NFE2L2/PARK7/KIAA1324/IVNS1ABP/TNFAIP3/CLU/SPOP/ZNF205/INHBA/G0S2/IL1B/PSME3/FIGNL1/TPT1/MAP3K7/TMBIM1/TLR4/IER3/ARRB2/AKT1/IL19/PSEN2/TCF7L2/PGAP2/RPS3/BCL2L11/NRG1/LMNA/ZNF385A/SYVN1/CSF2/GPER1/RET/BAG5/YW…	90
BP	GO:0060996	dendritic spine development	21/2711	58/16266	0.000258543	0.0246368	PAFAH1B1/UBA6/CAMK2B/ACSL4/PSEN1/MEF2C/NEURL1/CAPRIN2/CUX2/DLG4/CAPRIN1/SDK1/SHANK1/DISC1/PDLIM5/ARF4/BAIAP2/PAK2/RELN/SLC9A6/SRGAP2	21
BP	GO:0001558	regulation of cell growth	85/2711	356/16266	0.000265632	0.0248603	CD38/IFRD1/PAFAH1B1/TRO/ACSL4/IP6K2/RASGRP2/ENO1/JADE1/SMARCA2/EPB41L3/TAF9/WNT11/NRCAM/DPYSL2/SIRT1/ADNP/PSMD10/RAB11A/SGK3/LIMK1/TMEM97/CAPRIN2/VEGFA/HBEGF/CISH/RTN4/RPS6KA1/SGK1/SOCS2/PTK2B/NPPB/ZNF639/INHBA/EXOSC9/CDKN1A/MACF1/FGF13/EXOSC2/PPARG/PSRC1/ACVR1B/ADAM10/SEMA7A/LEF1/NTRK3/SMAD4/ERBB2/AKT1/CPNE9/SLIT2/IGFBP1/EI24/PPP1R1C/NRG1/CXCL16/DISC1/CLASP2/APBB2/SOX17/DCSTAMP/ILK/RRAD/GREM1/PH…	85
BP	GO:0097191	extrinsic apoptotic signaling pathway	59/2711	229/16266	0.000288178	0.0264972	GCLC/CFLAR/CX3CL1/FYN/BID/BAK1/KITLG/TRAF1/CASP8/FGFR1/CYLD/ITGA6/ZC3HC1/RFFL/SRPX/TRPS1/RPS6KB1/BMP5/IL4/IL1A/ACVR1/PARK7/KIAA1324/TNFAIP3/INHBA/G0S2/IL1B/PSME3/ACVR1B/TMBIM1/TLR4/IL33/AKT1/IL19/PSEN2/TCF7L2/BCL2L11/NRG1/IL6R/LMNA/HIPK1/CASP3/CSF2/GPER1/RET/TMC8/GABARAP/KRT8/RNF34/BCL2L1/BCL2/RELA/PAK2/WWOX/DCC/SRC/ACSL5/DAXX/DDX3X	59
BP	GO:1901532	regulation of hematopoietic progenitor cell differentiation	17/2711	43/16266	0.000295628	0.0267136	FOXC1/MEF2C/THPO/NFE2L2/PRMT1/ZBTB1/HIST1H4H/MIXL1/HIST1H4C/HIST1H4J/HIST2H4B/HIST1H4K/HIST1H4L/RAB7B/HIST1H4D/HIST1H4A/HIST1H4B	17
BP	GO:0035574	histone H4-K20 demethylation	9/2711	16/16266	0.000363543	0.0322937	HIST1H4H/HIST1H4C/HIST1H4J/HIST2H4B/HIST1H4K/HIST1H4L/HIST1H4D/HIST1H4A/HIST1H4B	9
BP	GO:0006998	nuclear envelope organization	24/2711	72/16266	0.000409609	0.0357793	PAFAH1B1/TPR/ASUN/SEH1L/NSFL1C/OSBPL8/NUP50/NUP93/NEK6/TARDBP/NUP85/NUP214/LPIN1/NUPL2/TOR1AIP1/LMNA/SUN3/SUN1/GPER1/SUN5/CDK1/CTDNEP1/POM121/NUP62	24
BP	GO:0071900	regulation of protein serine/threonine kinase activity	98/2711	427/16266	0.00042611	0.0358074	ALS2/MAP3K14/MAP3K9/MAP4K3/MNAT1/KITLG/TRIB2/FGFR1/EDN1/PSEN1/NOX4/PXN/CDC6/SIRT1/FBXO7/BIRC7/PSMD10/HTR2A/FLT1/RGCC/FBXO31/CEMIP/NOD1/PRKAG2/CDK5RAP3/PRKAR1A/MAPK10/RAPGEF2/FZD10/TPD52L1/MDFI/CCND3/VEGFA/CCNG1/PDGFRB/GADD45A/RGS4/PROX1/TNFAIP3/DUSP4/PTK2B/CXCR4/PKN1/CDKN1A/IL1B/BMP2/PKMYT1/SHC2/INPP5K/CDK7/PSRC1/APC/MDFIC/MAP3K7/PKIB/SPRY2/TLR4/DUSP5/FGF2/RGS3/DUSP6/NTRK3/ERBB2/AKT1/CALM2/C1QTNF…	98
BP	GO:0030219	megakaryocyte differentiation	18/2711	48/16266	0.000427307	0.0358074	MEF2C/THPO/IL11/PRMT1/FLI1/HIST1H4H/ZNF385A/PTPN11/ZFPM1/HIST1H4C/HIST1H4J/HIST2H4B/HIST1H4K/HIST1H4L/RAB7B/HIST1H4D/HIST1H4A/HIST1H4B	18
BP	GO:0051291	protein heterooligomerization	33/2711	111/16266	0.000430427	0.0358074	MED24/CASP8/BIRC2/CHMP2A/C1QTNF2/HIST1H4H/ILK/YWHAB/HIST3H3/CDH2/C1QTNF1/SEPT9/MAGI2/P2RX2/HBA2/HIST1H4C/HIST1H3J/HIST1H4J/HIST1H3D/STRADA/HIST2H4B/HIST1H4K/HIST1H3B/HIST1H3E/HIST1H4L/HIST1H3I/HIST1H3A/HIST1H4D/HIST1H3F/HIST1H3C/HIST1H4A/HIST1H4B/HIST1H3H	33
BP	GO:0050890	cognition	62/2711	248/16266	0.000488695	0.0400196	PAFAH1B1/FYN/UBA6/ABCA7/PTGS2/PSEN1/MEF2C/TMPRSS11E/GNAS/COMT/PTGS1/ADNP/OXT/MAGT1/HTR2A/NDRG4/CRTC1/RPS6KB1/MDK/CUX2/CHST10/SLC1A4/SGK1/ATP8A1/IL1B/FOXP2/FGF13/DLG4/SNAP25/NTS/STRA6/LHCGR/PSEN2/JPH3/ITGA5/ZNF385A/SHANK1/SHANK2/GPR155/CASP3/RP9/ADCY1/CHRFAM7A/ARF4/CHRM1/MECP2/ADRA1B/CNTNAP2/CHRNA7/BDNF/NRXN1/CLN8/PLCB1/BTBD9/CLDN5/CLN3/RELN/HRH1/GMFB/NTRK1/HLA-DRA/CYFIP1	62
BP	GO:0007249	I-kappaB kinase/NF-kappaB signaling	64/2711	258/16266	0.000500586	0.0403627	CFLAR/MAP3K14/FYN/BIRC3/TRAF3IP2/CASP8/PTGS2/NFKB2/MID2/ERC1/CYLD/ZFAND6/RNF31/CAPN3/SIRT1/NFKBIA/PSMD10/NDFIP2/UBE2I/EEF1D/RELB/NOD1/NFKB1/BIRC2/TFG/IL1A/TNFAIP3/NEK6/IL1B/IRF3/TNFRSF19/TRIM22/CD36/MAP3K7/TANK/TLR4/TLR2/PPM1B/SLC20A1/IRAK1BP1/TIRAP/IL18/UBC/ANGPT1/RHOC/NLRP3/GREM1/CTNNB1/RHOH/CANT1/CXXC5/PLEKHG5/MALT1/MYD88/RELA/SPHK1/C8orf4/LITAF/TLE1/MIB2/NUP62/UBD/CPNE1/UBA52	64
BP	GO:0002227	innate immune response in mucosa	11/2711	23/16266	0.000512668	0.0405097	IL4/HIST1H2BJ/FAU/HIST1H2BC/HIST2H2BE/HIST1H2BK/RPL39/HIST1H2BG/HIST1H2BE/HIST1H2BF/HIST1H2BI	11
BP	GO:0001933	negative regulation of protein phosphorylation	82/2711	348/16266	0.000522445	0.0405097	PAFAH1B1/PAX6/GPRC5A/BAK1/TRIB2/FBLN1/PSEN1/MECOM/SIRT1/PPM1F/FBXO7/PSMD10/FBXO31/PRKAG2/ENG/DVL1/DKK1/CDK5RAP3/PRKAR1A/CORO1C/CISH/ERRFI1/PARK7/GADD45A/RGS4/TNFAIP3/ITGB1BP1/SOCS2/DUSP4/TARDBP/PKN1/PMEPA1/CDKN1A/IL1B/LIF/PRKRIP1/GMFG/INPP5K/ZBED3/APC/PRR5L/PKIB/SPRY2/IL6/TLR4/MYC/DUSP5/RGS3/DUSP6/NTRK3/NCOR1/AKT1/PSEN2/CALM2/SLIT2/PPP1R1C/HHEX/ANGPT1/SAMSN1/SPRY1/CASP3/NDRG2/SPRED1/ILK/GREM1/PHB…	82
BP	GO:2000278	regulation of DNA biosynthetic process	16/2711	41/16266	0.000525599	0.0405097	NOX4/RGCC/ACD/PDGFRB/CDKN1A/PPARG/MYC/ARRB2/NVL/ANKRD1/FGFR4/GREM1/CTNNB1/SH2B1/CERS1/DACH1	16
BP	GO:0045931	positive regulation of mitotic cell cycle	34/2711	117/16266	0.000562897	0.0427557	PAFAH1B1/USP2/TPR/ASNS/EDN1/CDC6/RGCC/RAB11A/RAD51C/RPS6KB1/PDGFRB/IL1A/IL1B/STAT5A/CDK4/MDM2/RDX/TMOD3/ANAPC11/PPP1R1C/EIF4E/NSMCE2/SIN3A/WNT10B/PLRG1/MTBP/SPHK1/SH2B1/CD28/PTPN11/RAD51B/EPGN/PLCB1/DDX3X	34
BP	GO:0001649	osteoblast differentiation	52/2711	201/16266	0.000576217	0.0428283	CYP24A1/HDAC7/IFT80/PRKACA/FGFR1/MEF2C/WNT11/GNAS/PTHLH/HNRNPC/CD276/FBL/CCDC47/DDX5/AREG/GLI1/SMAD5/ACVR1/RPS15/FHL2/SATB2/RUNX2/RRBP1/BMP2/CITED1/FIGNL1/HSD17B4/IL6ST/APC/IL6/SEMA7A/LEF1/AKT1/EPHA2/SNRNP200/IL6R/ALPL/NPPC/ILK/PHB/TPM4/CTNNB1/PTK2/WNT10B/SMAD1/RSL1D1/SOX11/FAM20C/WWOX/SEMA4D/WNT7B/CLIC1	52
BP	GO:0040029	regulation of gene expression, epigenetic	70/2711	289/16266	0.000580196	0.0428283	MSL3/KMT2E/MNAT1/ARID1B/ARID4B/GNAS/SIRT1/PRMT5/APEX1/GTF2H3/TBP/DNMT3A/CTCFL/CDK7/HMGA1/TDG/GATAD2B/CELF1/CHEK1/CNOT8/HIST1H4H/DIRAS3/IFI16/H2AFZ/HIST1H2AA/CTNNB1/MECP2/SIN3A/SMAD1/TDRD12/GLMN/PRKRA/EHMT1/HIST3H2A/TDRKH/HIST2H3D/HIST2H2AC/HIST2H2AB/MORF4L1/TET3/HIST1H2AI/HIST1H2AG/HIST1H4C/HIST1H3J/HIST1H4J/HIST1H3D/HIST2H3C/HIST2H2AA3/HIST2H3A/MBD3L2/HIST2H4B/HIST2H2AA4/HIST1H4K/HIST1H3B/HIST1H…	70
BP	GO:0006469	negative regulation of protein kinase activity	53/2711	206/16266	0.000590806	0.0430058	GPRC5A/TRIB2/PSEN1/SIRT1/PPM1F/FBXO7/FBXO31/PRKAG2/DVL1/CDK5RAP3/PRKAR1A/CORO1C/CISH/ERRFI1/PARK7/GADD45A/RGS4/TNFAIP3/ITGB1BP1/SOCS2/DUSP4/PKN1/CDKN1A/IL1B/PRKRIP1/GMFG/INPP5K/APC/PKIB/SPRY2/IL6/DUSP5/RGS3/DUSP6/AKT1/PPP1R1C/HHEX/SPRY1/CASP3/SPRED1/ILK/DUS2/HEXIM2/PKIG/FABP4/SOCS6/TRIB1/PAK2/GMFB/ZGPAT/SPRED2/NUP62/DUSP14	53
BP	GO:0000226	microtubule cytoskeleton organization	94/2711	411/16266	0.000623363	0.0437531	PAFAH1B1/PAX6/ZNF207/TACC3/RNF19A/SPDL1/TPR/PPP1R12A/RNF4/ASUN/ATXN3/KIF2A/LLGL2/MLH1/CAMSAP3/USP33/CYLD/SEH1L/KIZ/HAUS4/TTLL1/NIN/CEP192/RAB11A/AURKC/DVL1/NEURL1/RSPH4A/GADD45A/STMN1/CAMSAP2/PPP2R4/NEK6/GPSM2/EML2/TUBGCP3/TUBGCP6/LRRC6/FGF13/TUBGCP2/CHMP2A/FIGNL1/FOPNL/PSRC1/APC/MAP7/DYNC1LI2/CEP350/CKAP2/SPRY2/ATAT1/TACC2/NCOR1/BCAS3/CCDC40/TACC1/CHEK1/BICD1/PCNT/LMNA/RACGAP1/DISC1/CLASP2/SPRY1…	94
BP	GO:0014841	skeletal muscle satellite cell proliferation	7/2711	11/16266	0.000626118	0.0437531	CFLAR/PPARD/SIX1/FGF2/MEGF10/ANGPT1/STAT3	7
BP	GO:0061003	positive regulation of dendritic spine morphogenesis	7/2711	11/16266	0.000626118	0.0437531	PAFAH1B1/CAMK2B/CAPRIN2/CUX2/CAPRIN1/BAIAP2/RELN	7
BP	GO:0043122	regulation of I-kappaB kinase/NF-kappaB signaling	58/2711	231/16266	0.000650161	0.0442448	CFLAR/MAP3K14/FYN/BIRC3/TRAF3IP2/CASP8/PTGS2/MID2/CYLD/ZFAND6/RNF31/CAPN3/SIRT1/NFKBIA/PSMD10/NDFIP2/UBE2I/EEF1D/NOD1/BIRC2/TFG/IL1A/TNFAIP3/NEK6/IL1B/IRF3/TNFRSF19/TRIM22/CD36/MAP3K7/TLR4/TLR2/PPM1B/SLC20A1/TIRAP/IL18/UBC/ANGPT1/RHOC/NLRP3/GREM1/CTNNB1/RHOH/CANT1/CXXC5/PLEKHG5/MALT1/MYD88/RELA/SPHK1/C8orf4/LITAF/TLE1/MIB2/NUP62/UBD/CPNE1/UBA52	58
BP	GO:0042326	negative regulation of phosphorylation	89/2711	386/16266	0.000654277	0.0442448	PAFAH1B1/PAX6/GPRC5A/BAK1/TRIB2/FBLN1/PSEN1/MECOM/SIRT1/PPM1F/FBXO7/PSMD10/FBXO31/GRB10/PRKAG2/ENG/DVL1/DKK1/CDK5RAP3/PRKAR1A/CORO1C/CISH/ERRFI1/PARK7/GADD45A/RGS4/TNFAIP3/ITGB1BP1/SOCS2/DUSP4/TARDBP/INHBA/PKN1/PMEPA1/CDKN1A/IL1B/FOXA2/LIF/PRKRIP1/GMFG/INPP5K/ZBED3/APC/PRR5L/PKIB/SPRY2/IL6/TLR4/MYC/IER3/DUSP5/RGS3/DUSP6/NTRK3/NCOR1/AKT1/PSEN2/CALM2/SLIT2/PPP1R1C/HHEX/ANGPT1/SAMSN1/PRPSAP1/SPRY1/C…	89
BP	GO:0071674	mononuclear cell migration	9/2711	17/16266	0.00065848	0.0442448	CX3CL1/CCL2/BMP5/IL4/TNFSF18/SLIT2/HIST1H2BA/CMKLR1/CSF1	9
BP	GO:0039694	viral RNA genome replication	8/2711	14/16266	0.000682934	0.0447407	ATG16L1/TOP2A/INPP5K/ATG16L2/CXCL8/SUPT5H/ATG7/APOBEC3D	8
BP	GO:0039703	RNA replication	8/2711	14/16266	0.000682934	0.0447407	ATG16L1/TOP2A/INPP5K/ATG16L2/CXCL8/SUPT5H/ATG7/APOBEC3D	8
BP	GO:0045666	positive regulation of neuron differentiation	67/2711	276/16266	0.000705061	0.0448329	PAFAH1B1/FYN/CAMK2B/LTK/PPP2R5B/FGFR1/PSEN1/MEF2C/NRCAM/ADNP/NDRG4/FBXO31/RAB11A/CRTC1/SCN1B/LIMK1/DVL1/NEURL1/RAPGEF2/CAPRIN2/CUX2/BMP5/PTK7/VEGFA/EIF4G1/PROX1/TGIF2/PTK2B/FOXA2/NKX2-2/BMP2/MACF1/LIF/KIDINS220/CAPRIN1/IL6/SEMA7A/NTRK3/CPNE9/SLIT2/ANKRD1/PTPRD/GDPD5/NBL1/SHANK1/DISC1/PLXNB1/RET/ILK/ENC1/BCL2/VWC2L/BAIAP2/BDNF/SOX11/TGIF1/IST1/MAPT/SHTN1/MAGI2/SEMA4D/RELN/PLXNB2/ITSN2/NTRK1/CPNE1/…	67
BP	GO:0045786	negative regulation of cell cycle	109/2711	490/16266	0.000705126	0.0448329	MAD1L1/KMT2E/ZNF207/RRAGD/TPR/FOXN3/FOXC1/RASSF1/PPP2R5B/PRKACA/PTGS2/TIPIN/JADE1/FAP/PSMD5/FBXO7/CGRRF1/PSMA7/PSMD10/STAG2/RGCC/FBXO31/MED25/TAF6/RHEB/PRKAG2/CUL2/CDK5RAP3/PSMD11/PRKAR1A/GMNN/NEK11/GADD45A/RPA2/TNFAIP3/INHBA/ZWINT/NR4A1/CDKN1A/IRF1/BMP2/MACF1/LIF/PSMG2/E2F8/CHMP2A/PSME3/TOP2A/TERF2/CDK7/CDC73/ETS1/APC/CDK4/MDM2/BIN1/MYC/IER3/BARD1/FANCI/ANAPC11/PRKACB/TCF7L2/DGKZ/CHEK1/UBC/HHEX/…	109
BP	GO:0045638	negative regulation of myeloid cell differentiation	26/2711	83/16266	0.000710004	0.0448329	NFKBIA/INPP4B/IL4/GPR68/PTK2B/INHBA/PRMT1/STAT5A/CDC73/TLR4/MYC/WDR61/HIST1H4H/C1QC/RUNX1/CTNNB1/TRIB1/ZFPM1/HIST1H4C/HIST1H4J/HIST2H4B/HIST1H4K/HIST1H4L/HIST1H4D/HIST1H4A/HIST1H4B	26
BP	GO:0033002	muscle cell proliferation	38/2711	137/16266	0.000749391	0.0467566	CFLAR/CX3CL1/MNAT1/FOXC1/PTGS2/FGFR1/EDN1/XRCC5/MEF2C/COMT/NDRG4/NAMPT/RPS6KB1/PRKAR1A/PPARD/HBEGF/NPR3/PDGFRB/FOXP1/TNFAIP3/SIX1/PPARG/IL6/FGF2/MEGF10/TCF7L2/ANGPT1/NRG1/IL6R/NPPC/NDRG2/ILK/CTNNB1/RBPJ/STAT3/SMAD1/TRIB1/MAPK11	38
BP	GO:0001657	ureteric bud development	30/2711	101/16266	0.000780246	0.0481091	CD44/FOXC1/FGFR1/WNT11/VEGFA/SMAD5/WNT6/PGF/SMAD9/BMP2/CITED1/SIX1/HOXD11/MYC/FGF2/SMAD4/OSR1/SLIT2/ADAMTS16/KIF26B/SPRY1/RET/ILK/GREM1/CTNNB1/SMAD1/BCL2/BDNF/WT1/FMN1	30
BP	GO:0060560	developmental growth involved in morphogenesis	51/2711	199/16266	0.000815073	0.0496721	IFRD1/PAFAH1B1/PPP2R3A/PTHLH/NRCAM/DPYSL2/ADNP/RAB11A/LIMK1/DVL1/AREG/COL9A1/PTK7/VEGFA/RTN4/FLRT3/SIX1/MACF1/POR/HOXD13/FGF13/SPRY2/MMP13/SEMA7A/NTRK3/CPNE9/SLIT2/STC1/KIF26B/DISC1/NPPC/CLASP2/SPRY1/ILK/BNC2/RAPH1/BDNF/IST1/NDN/CSF1/MAPT/SHTN1/DCC/MAGI2/SEMA4D/WNT7B/ITSN2/SLC9A6/CPNE1/FMN1/CYFIP1	51
CC	GO:0000786	nucleosome	58/2866	100/17410	4.32301e-21	2.59813e-18	KAT6A/HIST1H1D/HIST1H2BJ/HIST1H2BA/HIST1H2BD/HIST1H4H/H2AFZ/HIST1H2AA/HIST3H3/HIST1H1E/HIST1H2BC/HIST3H2A/HIST2H3D/HIST2H2AC/HIST2H2AB/HIST1H1B/HIST2H2BE/HIST1H1T/HIST1H1C/HIST1H2AI/HIST1H2AG/HIST1H4C/HIST1H3J/HIST1H4J/HIST1H3D/HIST1H2BK/HIST2H3C/HIST2H2AA3/HIST2H2BF/HIST2H3A/HIST1H2BN/HIST2H4B/HIST2H2AA4/HIST1H4K/HIST1H2BM/HIST1H2BG/HIST1H3B/HIST1H2BE/HIST1H2BO/HIST1H3E/HIST1H2AH/HIST1H4L/HIST1H…	58
CC	GO:0044815	DNA packaging complex	58/2866	106/17410	2.12571e-19	6.38776e-17	KAT6A/HIST1H1D/HIST1H2BJ/HIST1H2BA/HIST1H2BD/HIST1H4H/H2AFZ/HIST1H2AA/HIST3H3/HIST1H1E/HIST1H2BC/HIST3H2A/HIST2H3D/HIST2H2AC/HIST2H2AB/HIST1H1B/HIST2H2BE/HIST1H1T/HIST1H1C/HIST1H2AI/HIST1H2AG/HIST1H4C/HIST1H3J/HIST1H4J/HIST1H3D/HIST1H2BK/HIST2H3C/HIST2H2AA3/HIST2H2BF/HIST2H3A/HIST1H2BN/HIST2H4B/HIST2H2AA4/HIST1H4K/HIST1H2BM/HIST1H2BG/HIST1H3B/HIST1H2BE/HIST1H2BO/HIST1H3E/HIST1H2AH/HIST1H4L/HIST1H…	58
CC	GO:0032993	protein-DNA complex	72/2866	163/17410	6.27885e-17	1.25786e-14	POLD1/NFYC/XRCC5/KAT6A/ACD/NFE2L2/RPA2/HIST1H1D/HIST1H2BJ/RPA1/TERF2/LEF1/HIST1H2BA/TCF7L2/HHEX/HIST1H2BD/HIST1H4H/H2AFZ/HIST1H2AA/CTNNB1/HIST3H3/HIST1H1E/PLRG1/POLD4/HIST1H2BC/HIST3H2A/HIST2H3D/HIST2H2AC/HIST2H2AB/HIST1H1B/HIST2H2BE/HIST1H1T/HIST1H1C/HIST1H2AI/HIST1H2AG/HIST1H4C/HIST1H3J/HIST1H4J/HIST1H3D/HIST1H2BK/HIST2H3C/HIST2H2AA3/HIST2H2BF/HIST2H3A/HIST1H2BN/HIST2H4B/HIST2H2AA4/HIST1H4K/HIS…	72
CC	GO:0000228	nuclear chromosome	141/2866	480/17410	5.94969e-13	8.93941e-11	LIG3/PAX6/ZBTB32/ERCC1/CALCOCO1/DDX11/NR1H3/FOXC1/POLD1/MCM10/MEF2A/TIPIN/MLH1/XRCC5/SMARCA2/TCF7/HNRNPC/SIRT1/MCM5/CCNB1IP1/REC8/ACD/UBE2I/ASF1B/AURKC/RAD51C/PHC1/TBP/POLR3G/UCHL5/RPA2/MLH3/DNMT3A/TARDBP/RNF2/ZRANB3/EXOSC9/HIST1H1D/HIST1H2BJ/RUNX2/IRF1/NFATC1/TOP2A/RPA1/FIGNL1/TERF2/CDC73/ACTL6A/APTX/FAM60A/USP3/NCOR1/SMAD4/POGZ/GATAD2B/NHP2/HIST1H2BA/HMBOX1/TCF7L2/CHEK1/ORAOV1/DCLRE1C/HIST1H2BD…	141
CC	GO:0000790	nuclear chromatin	94/2866	282/17410	2.10462e-12	2.38222e-10	PAX6/CALCOCO1/DDX11/NR1H3/FOXC1/MEF2A/TIPIN/SMARCA2/TCF7/HNRNPC/SIRT1/ASF1B/PHC1/TBP/POLR3G/UCHL5/DNMT3A/TARDBP/RNF2/HIST1H1D/HIST1H2BJ/RUNX2/IRF1/NFATC1/ACTL6A/APTX/FAM60A/USP3/NCOR1/SMAD4/POGZ/GATAD2B/HIST1H2BA/TCF7L2/HIST1H2BD/ZNF385A/H2AFZ/CITED2/HIST1H2AA/NSMF/CTNNB1/HIST3H3/HIST1H1E/POLR3D/STAT3/SIN3A/DFFB/NFRKB/ASXL1/ENC1/BRMS1/PUS1/UBE2U/RCC1/HIST1H2BC/HIST3H2A/PLCB1/HIST2H2AC/HIST2H2AB/H…	94
CC	GO:0044454	nuclear chromosome part	131/2866	443/17410	2.37825e-12	2.38222e-10	LIG3/PAX6/ERCC1/CALCOCO1/DDX11/NR1H3/FOXC1/POLD1/MCM10/MEF2A/TIPIN/MLH1/XRCC5/SMARCA2/TCF7/HNRNPC/SIRT1/MCM5/CCNB1IP1/REC8/ACD/UBE2I/ASF1B/AURKC/PHC1/TBP/POLR3G/UCHL5/RPA2/MLH3/DNMT3A/TARDBP/RNF2/ZRANB3/HIST1H1D/HIST1H2BJ/RUNX2/IRF1/NFATC1/RPA1/TERF2/CDC73/ACTL6A/APTX/FAM60A/USP3/NCOR1/SMAD4/POGZ/GATAD2B/NHP2/HIST1H2BA/HMBOX1/TCF7L2/ORAOV1/DCLRE1C/HIST1H2BD/HIST1H4H/ZNF385A/H2AFZ/CITED2/HIST1H2AA…	131
CC	GO:0000785	chromatin	128/2866	434/17410	5.20999e-12	4.47315e-10	PAX6/CALCOCO1/DDX11/NR1H3/FOXC1/MEF2A/TIPIN/SMARCA2/TCF7/KAT6A/HNRNPC/SIRT1/STAG2/ASF1B/PHC1/TBP/POLR3G/SF3B1/NFE2L2/PARK7/UCHL5/RPA2/DNMT3A/TARDBP/RNF2/HIST1H1D/HIST1H2BJ/RUNX2/IRF1/UBA1/NFATC1/CDK4/ACTL6A/APTX/HMGA1/FAM60A/WDR61/USP3/NCOR1/BCAS3/SMAD4/POGZ/GATAD2B/HIST1H2BA/TCF7L2/CHEK1/HIST1H2BD/HIST1H4H/ZNF385A/H2AFZ/CITED2/HIST1H2AA/NSMF/CTNNB1/HIST3H3/HIST1H1E/POLR3D/STAT3/MECP2/SIN3A/DFFB/…	128
CC	GO:0000788	nuclear nucleosome	23/2866	36/17410	2.23966e-10	1.68254e-08	HIST1H2BJ/HIST1H2BA/HIST1H2BD/HIST3H3/HIST1H2BC/HIST3H2A/HIST2H2BE/HIST1H3J/HIST1H3D/HIST1H2BK/HIST2H2BF/HIST1H2BN/HIST1H2BG/HIST1H3B/HIST1H2BE/HIST1H3E/HIST1H3I/HIST1H3A/HIST1H2BF/HIST1H3F/HIST1H3C/HIST1H2BI/HIST1H3H	23
CC	GO:0005874	microtubule	101/2866	381/17410	3.48829e-07	2.3294e-05	PAFAH1B1/ZNF207/STAU2/KIF1B/RASSF1/KIF2A/CFAP20/CAMSAP3/DYNC1I2/SCTR/MID2/CYLD/DNM1L/KIF9/NUDC/HAUS4/DPYSL2/TTLL1/NIN/TBL1X/RAB11A/NDRG1/TUBB4A/KLC3/AURKC/DNAH11/CLIP2/DVL1/CDK5RAP3/RMDN2/STMN1/CAMSAP2/NEK6/SERP1/TEKT3/EML2/TUBGCP3/MACF1/TUBGCP6/MTUS1/FGF13/CAMSAP1/TUBGCP2/KIF3A/PSRC1/APC/MAP7/DYNC1LI2/CKAP2/SPRY2/ODF2/KLC4/ATAT1/LRRC49/RMDN3/GABARAPL1/NCOR1/BCAS3/CALM2/NICN1/TRIM55/SYBU/BICD1/BC…	101
CC	GO:0005925	focal adhesion	97/2866	389/17410	1.02597e-05	0.000565481	CD9/TSPAN9/PLAUR/VIM/CD44/CDH1/GDI2/PPP1R12A/CNN2/SLC9A3R2/ACTN1/LIMS2/FERMT2/REXO2/FAP/EPB41L2/ITGB5/CD59/NOX4/ADD1/PXN/ITGA6/PACSIN2/CD99L2/ARHGEF7/FLT1/RPS16/LIMK1/ENG/HSPA8/RPS13/PPFIBP1/CORO1C/NEDD9/WASF1/PTK7/PDGFRB/ACTR3/RPS15/FHL2/RND3/PTK2B/PDLIM2/RPL5/PLAU/RPS10/NUP214/KDM4B/PTPN12/CDC42EP1/RAC2/ARHGAP22/PALLD/ARPC1B/PAK4/NUMB/TES/LMO7/HMGA1/ATAT1/RDX/ADAM10/ARHGAP24/SCARB2/EPHA2/LPP/RP…	97
CC	GO:0005924	cell-substrate adherens junction	98/2866	394/17410	1.03499e-05	0.000565481	CD9/TSPAN9/PLAUR/VIM/CD44/CDH1/GDI2/PPP1R12A/CNN2/SLC9A3R2/ACTN1/LIMS2/FERMT2/REXO2/FAP/EPB41L2/ITGB5/CD59/NOX4/ADD1/PXN/ITGA6/PACSIN2/CD99L2/ARHGEF7/FLT1/RPS16/LIMK1/ENG/HSPA8/RPS13/PPFIBP1/CORO1C/NEDD9/WASF1/PTK7/PDGFRB/ACTR3/RPS15/FHL2/RND3/PTK2B/PDLIM2/RPL5/PLAU/RPS10/NUP214/KDM4B/PTPN12/CDC42EP1/RAC2/ARHGAP22/PALLD/ARPC1B/PAK4/NUMB/TES/LMO7/CIB2/HMGA1/ATAT1/RDX/ADAM10/ARHGAP24/SCARB2/EPHA2/L…	98
CC	GO:0030055	cell-substrate junction	98/2866	398/17410	1.61237e-05	0.000807528	CD9/TSPAN9/PLAUR/VIM/CD44/CDH1/GDI2/PPP1R12A/CNN2/SLC9A3R2/ACTN1/LIMS2/FERMT2/REXO2/FAP/EPB41L2/ITGB5/CD59/NOX4/ADD1/PXN/ITGA6/PACSIN2/CD99L2/ARHGEF7/FLT1/RPS16/LIMK1/ENG/HSPA8/RPS13/PPFIBP1/CORO1C/NEDD9/WASF1/PTK7/PDGFRB/ACTR3/RPS15/FHL2/RND3/PTK2B/PDLIM2/RPL5/PLAU/RPS10/NUP214/KDM4B/PTPN12/CDC42EP1/RAC2/ARHGAP22/PALLD/ARPC1B/PAK4/NUMB/TES/LMO7/CIB2/HMGA1/ATAT1/RDX/ADAM10/ARHGAP24/SCARB2/EPHA2/L…	98
CC	GO:0070161	anchoring junction	114/2866	485/17410	3.17681e-05	0.00146866	CD9/TSPAN9/PLAUR/VIM/CD44/VEZT/CDH1/GDI2/PPP1R12A/CNN2/SLC9A3R2/ACTN1/LIMS2/FERMT2/REXO2/CAMSAP3/FAP/EPB41L2/PKP1/ITGB5/CD59/NOX4/ADD1/PXN/ITGA6/PACSIN2/CD99L2/ARHGEF7/FLT1/NDRG1/RPS16/LIMK1/ENG/HSPA8/RPS13/PPFIBP1/CORO1C/NEDD9/WASF1/PTK7/PDGFRB/ACTR3/RPS15/FHL2/RND3/TJP2/PTK2B/PDLIM2/RPL5/PLAU/RPS10/NUP214/KDM4B/PTPN12/CDC42EP1/RAC2/ARHGAP22/PALLD/MLLT4/ARPC1B/PAK4/UBA1/NUMB/DSG1/DSC1/APC/TES/LM…	114
CC	GO:0031252	cell leading edge	85/2866	341/17410	3.57932e-05	0.00153655	ALS2/PAFAH1B1/VIM/CDH1/PSD/ABCA7/RASGRP2/ACTN1/FERMT2/FAP/EPB41L3/ITGB5/SSH1/GNAS/PXN/TRPM7/ABLIM1/MYO9B/PACSIN2/ARHGEF7/SLC1A2/CORO1C/NEDD9/WASF1/FRMD4B/ACTR3/CCDC88A/AAK1/ITGB1BP1/PTK2B/CXCR4/MACF1/SGCE/RAC2/PALLD/INPP5K/MYH10/APC/ARHGEF4/SPRY2/RDX/ABI2/GABARAPL1/BCAS3/EPHA2/SNTG1/DGKZ/RPS3/TIRAP/PTPRO/EPS8/PTPRK/ENAH/SAMSN1/ACTC1/ITGA5/ARPC2/CLASP2/APBB2/DLC1/GPER1/ILK/CTNNB1/ARF4/PTK2/ANTXR1/…	85
CC	GO:0005912	adherens junction	110/2866	467/17410	3.95528e-05	0.00158475	CD9/TSPAN9/PLAUR/VIM/CD44/VEZT/CDH1/GDI2/PPP1R12A/CNN2/SLC9A3R2/ACTN1/LIMS2/FERMT2/REXO2/CAMSAP3/FAP/EPB41L2/ITGB5/CD59/NOX4/ADD1/PXN/ITGA6/PACSIN2/CD99L2/ARHGEF7/FLT1/NDRG1/RPS16/LIMK1/ENG/HSPA8/RPS13/PPFIBP1/CORO1C/NEDD9/WASF1/PTK7/PDGFRB/ACTR3/RPS15/FHL2/RND3/TJP2/PTK2B/PDLIM2/RPL5/PLAU/RPS10/NUP214/KDM4B/PTPN12/CDC42EP1/RAC2/ARHGAP22/PALLD/MLLT4/ARPC1B/PAK4/NUMB/APC/TES/LMO7/CIB2/HMGA1/ATAT1/…	110
CC	GO:0015629	actin cytoskeleton	101/2866	438/17410	0.000187784	0.00705365	MAD1L1/HFE/FYN/CDH1/PPP1R12A/CNN2/MYO9A/SPTB/MYO3B/ACTN1/LLGL2/FERMT2/UBE2K/EPB41L2/NOX4/ADD1/KIF9/PXN/MAEA/MYO15A/MYL6/ABLIM1/MYO9B/STAG2/TNNT1/CORO1C/WASF1/CLIC5/APBB3/ACTR3/FHL2/IVNS1ABP/MYL12B/PLS1/PDLIM2/WIPF3/CALD1/NFE2/MYH2/BFSP1/MACF1/PTPN12/CDC42EP1/RAC2/PALLD/ARPC1B/DCTN4/MYH8/MYH10/ARHGAP32/BIN1/RDX/TMOD3/TPM3/CASK/C9orf72/ALDOA/ENAH/ACTC1/ZYX/FBLIM1/VCAM1/PDLIM5/LMOD3/ARPC2/ABLIM2/DLC…	101
CC	GO:0001725	stress fiber	19/2866	50/17410	0.000207413	0.00733266	CNN2/ACTN1/FERMT2/NOX4/PXN/ABLIM1/MYL12B/PDLIM2/MYH10/TPM3/ENAH/ZYX/FBLIM1/MICALL2/ILK/TPM4/PTK2/ABLIM3/SEPT9	19
CC	GO:0000784	nuclear chromosome, telomeric region	26/2866	80/17410	0.000309299	0.0103272	ERCC1/XRCC5/MCM5/ACD/RPA2/RPA1/TERF2/CDC73/NHP2/HIST1H2BA/HMBOX1/DCLRE1C/HIST1H4H/HIST1H2AA/ORC5/HIST3H3/CDK1/HIST1H4C/HIST1H4J/HIST2H4B/HIST1H4K/HIST1H4L/HIST1H2BB/HIST1H4D/HIST1H4A/HIST1H4B	26
CC	GO:0098687	chromosomal region	68/2866	278/17410	0.000366889	0.011168	MAD1L1/PAFAH1B1/ZNF207/SCMH1/ERCC1/SPDL1/TPR/PPP1R12A/SMG6/XRCC5/RIF1/PSEN1/SEH1L/MCM5/REC8/STAG2/CENPI/ACD/AURKC/RPA2/DNMT3A/ZWINT/NUP85/RPA1/TERF2/CDC73/APC/PSEN2/NHP2/HIST1H2BA/HMBOX1/CHEK1/DSN1/CENPU/DCLRE1C/CFDP1/NSMCE2/SEC13/HIST1H4H/DYNC1I1/PMF1/SPC24/CLASP2/PBRM1/HIST1H2AA/ORC5/CENPN/WDR81/HIST3H3/SEPT2/SIN3A/STRA13/CDK1/MTBP/ZWILCH/DHX36/CHEK2/KNTC1/HIST1H4C/HIST1H4J/DAXX/HIST2H4B/HIST1H…	68
CC	GO:0042641	actomyosin	21/2866	60/17410	0.000371648	0.011168	CNN2/ACTN1/FERMT2/NOX4/PXN/ABLIM1/MYL12B/PDLIM2/MYH10/TPM3/ENAH/ACTC1/ZYX/FBLIM1/MICALL2/ILK/TPM4/PTK2/ABLIM3/SEPT9/MYO18A	21
CC	GO:0005635	nuclear envelope	89/2866	390/17410	0.000625025	0.0173994	MAD1L1/PAFAH1B1/MATR3/PHF20/ZZZ3/TPR/PTGER3/RRP12/NUCB2/OSBPL6/SP140/PSEN1/RNF13/P2RX5/SEH1L/OSBPL8/DTX2/ZC3HC1/NUP50/PTGS1/SIRT1/MTMR8/NUP93/BNIP3L/PLA2G4C/HSD17B1/LRRC59/TMEM97/CEP70/RTN4/ENY2/NR4A1/NUP85/NUP214/RAC2/CLN6/EIF5A/GUCY2D/LPIN1/CDK4/TSGA10/SCRN1/NUPL2/BRIP1/TEX10/PRICKLE1/CERS5/CMTM3/TMC6/TOR1AIP1/CERS2/PSEN2/MLIP/GSTO1/EI24/SEC13/LMNA/GABRB1/SUN3/SUN1/GPER1/NSMF/SUN5/TMC8/SNUPN/AD…	89
CC	GO:0000781	chromosome, telomeric region	32/2866	110/17410	0.000636917	0.0173994	ERCC1/SMG6/XRCC5/RIF1/MCM5/ACD/RPA2/RPA1/TERF2/CDC73/NHP2/HIST1H2BA/HMBOX1/CHEK1/DCLRE1C/NSMCE2/HIST1H4H/HIST1H2AA/ORC5/HIST3H3/CDK1/DHX36/CHEK2/HIST1H4C/HIST1H4J/HIST2H4B/HIST1H4K/HIST1H4L/HIST1H2BB/HIST1H4D/HIST1H4A/HIST1H4B	32
CC	GO:0005938	cell cortex	57/2866	232/17410	0.000934629	0.0244223	PAFAH1B1/HFE/USP2/CDH1/LAMC2/SPTB/LLGL2/FERMT2/EPB41L2/PSEN1/PXN/MAEA/OSBPL8/MYO9B/ARHGEF7/PLA2G4C/NEDD9/CLIC5/PLS1/PTK2B/PDLIM2/GPSM2/WIPF3/CALD1/MYH2/TRIP10/DLG4/MYH10/TRPC4/ARHGAP32/GYPC/RDX/PSEN2/EPS8/FBLIM1/CLASP2/DLC1/NSMF/TPM4/WDR81/CTNNB1/OR2C1/SEPT2/PTK2/CDH2/WIPF2/NLRP5/SPTBN2/KDF1/EXOC3/CLDN5/FMNL1/MYO6/ASPH/CAPZA2/DAXX/EXOC3L4	57
CC	GO:0032432	actin filament bundle	19/2866	56/17410	0.00107261	0.0268601	CNN2/ACTN1/FERMT2/NOX4/PXN/ABLIM1/MYL12B/PDLIM2/MYH10/TPM3/ENAH/ZYX/FBLIM1/MICALL2/ILK/TPM4/PTK2/ABLIM3/SEPT9	19
CC	GO:0032153	cell division site	18/2866	53/17410	0.00141916	0.0328044	SSH1/MAEA/RAB11A/PITPNM1/PKN1/STAMBP/MYH2/TUBGCP3/TUBGCP6/TUBGCP2/MYH10/RDX/RHOC/PLCD3/RACGAP1/ZFYVE19/SEPT2/SVIL	18
CC	GO:0032155	cell division site part	18/2866	53/17410	0.00141916	0.0328044	SSH1/MAEA/RAB11A/PITPNM1/PKN1/STAMBP/MYH2/TUBGCP3/TUBGCP6/TUBGCP2/MYH10/RDX/RHOC/PLCD3/RACGAP1/ZFYVE19/SEPT2/SVIL	18
MF	GO:0046982	protein heterodimerization activity	119/2718	458/16325	1.9144e-07	0.000178231	GCLC/RRAGD/BAK1/ANO2/CASP8/NFYC/MEF2A/SPTB/SRI/DGKD/MID2/MEF2C/TAF9/ADD1/PRMT5/TPD52L2/BNIP3L/ATP4A/TAF6/LIMK1/MICU1/ENO3/NFKB1/SOX6/TPD52L1/PPARD/VEGFA/TBX18/LIFR/PPP2R4/PGF/INHBA/NR4A1/HIST1H2BJ/BMP2/ZBTB1/FOXP2/SYT5/TOP2A/ARNTL/SOX5/GAD2/TLR2/BARD1/PPP3CA/SMAD4/ERBB2/HIST1H2BA/TIRAP/CEBPG/HIST1H2BD/HIST1H4H/RUNX1/NAE1/H2AFZ/GUCY1A3/HIST1H2AA/SOX17/ZHX1/ABTB2/PAFAH1B2/HIST3H3/CHRNA5/ADRA1B/SMAD…	119
MF	GO:0070491	repressing transcription factor binding	23/2718	58/16325	2.49405e-05	0.0116098	HDAC7/SRI/ZMYND8/TLE4/GMNN/TBP/PARK7/RUNX2/ARNTL/GSC/MYC/TCF7L2/EIF4E/HHEX/RUNX1/CTNNB1/RBPJ/STAT3/SIN3A/RELA/MAGEA2/MAGEA2B/MIXL1	23

## Sheet: mRNA_No UV_cluster 3
transcript_id	gene_id	gene_name	C_0	C_3	C_6	C_9	C_12	C_24
ENST00000517671	ENSG00000181163	NPM1	0.155455	0.655699	447.44	0.559699	0.429618	0
ENST00000406022	ENSG00000147403	RPL10	0	1.59649	164.317	16.8692	0	8.31797
ENST00000497965	ENSG00000116251	RPL22	34.068	0	99.3423	6.07495	0	0
ENST00000368096	ENSG00000158710	TAGLN2	0.056221	76.9405	98.9214	0.008665	0.041494	2.12527
ENST00000519030	ENSG00000104408	EIF3E	0	0	65.3937	0	0	0
ENST00000375734	ENSG00000115963	RND3	6.33552	13.4302	54.3756	5.92209	3.88365	24.9472
ENST00000312783	ENSG00000087586	AURKA	5.50479	9.97671	42.5297	4.64835	5.54654	6.81874
ENST00000262105	ENSG00000104738	MCM4	1.28472	4.77438	37.8769	4.71571	1.02775	7.09973
ENST00000537526	ENSG00000124422	USP22	0	0.000415	34.4437	0	0.002074	0.001041
ENST00000489294	ENSG00000152332	UHMK1	4.33274	6.86428	29.7609	2.05522	6.63679	1.86817
ENST00000360566	ENSG00000171848	RRM2	1.58998	1.33162	27.603	1.26193	1.51012	1.82906
ENST00000531621	ENSG00000104529	EEF1D	0.577405	9.23236	25.696	0.451798	5.47007	8.48725
ENST00000239940	ENSG00000070087	PFN2	3.18971	3.06523	24.8457	2.90689	5.70251	5.85304
ENST00000368069	ENSG00000122218	COPA	2.9957	0.892439	24.2846	0.475573	0.598879	0.522309
ENST00000430350	ENSG00000171867	PRNP	0	3.98706	21.8543	9.14161	1.56691	0
ENST00000542507	ENSG00000198492	YTHDF2	0	0	18.8547	0	0	0
ENST00000428648	ENSG00000154978	VOPP1	0.002676	12.3438	18.2592	0.001338	0.001831	0.000434
ENST00000405867	ENSG00000138029	HADHB	0	4.22653	17.8328	0	2.28717	8.05702
ENST00000535254	ENSG00000169679	BUB1	7.07428	2.22206	17.4855	2.52659	2.38696	1.23956
ENST00000543751	ENSG00000165304	MELK	2.51789	2.39762	17.2222	3.447	4.13277	3.13988
ENST00000507777	ENSG00000184432	COPB2	0.000177	0.00167	16.5578	0	0	0
ENST00000539554	ENSG00000111196	MAGOHB	0.768099	0.848217	15.5643	0.437853	8.07774	0.459484
ENST00000346403	ENSG00000128739	SNRPN	4.53072	4.89148	15.3203	4.26882	1.23693	3.51418
ENST00000233505	ENSG00000115163	CENPA	2.11673	3.05961	14.8665	1.97885	0.561475	2.20113
ENST00000394223	ENSG00000109390	NDUFC1	0	0	14.4355	0.42975	0.201655	0
ENST00000538098	ENSG00000133316	WDR74	0	0	14.329	0	0.088493	0
ENST00000590954	ENSG00000091164	TXNL1	0.764323	0	14.0241	0	0	0
ENST00000552130	ENSG00000111237	VPS29	0	0	13.5614	0	0.018128	1.28452
ENST00000308775	ENSG00000173402	DAG1	2.04585	3.80209	13.2929	0.595586	0.860569	2.44014
ENST00000646036	ENSG00000027697	IFNGR1	0	0.004122	12.382	0	0	0
ENST00000221975	ENSG00000105372	RPS19	0	0	12.356	0	0	0
ENST00000409181	ENSG00000116030	SUMO1	0	0	11.8762	0	0.328425	0
ENST00000526339	ENSG00000110717	NDUFS8	0.961143	1.26411	11.7056	1.16985	1.49663	1.11394
ENST00000359895	ENSG00000196923	PDLIM7	0.200515	0	11.4843	0	0	0
ENST00000367350	ENSG00000118193	KIF14	0.404478	0.40515	11.4287	1.32747	0.707632	0.86445
ENST00000506179	ENSG00000109814	UGDH	0.006015	0	11.2577	0.006388	0.001737	0.002838
ENST00000372259	ENSG00000117419	ERI3	3.01842	0	10.6803	0	2.64325	0.006871
ENST00000340368	ENSG00000186480	INSIG1	4.44516	0.416048	10.4714	2.0467	1.38519	0.654238
ENST00000398399	ENSG00000206538	VGLL3	2.39747	0.871691	10.1509	0.29063	0.247532	0.629381
ENST00000376062	ENSG00000171552	BCL2L1	1.66985	2.17252	10.1323	0.479523	0.44046	1.04787
ENST00000399494	ENSG00000189403	HMGB1	0.005769	0.026873	10.0323	0.05262	0.004802	0.024602
ENST00000372902	ENSG00000126953	TIMM8A	3.06253	0.463373	9.70385	0.437169	2.22232	0.477414
ENST00000402965	ENSG00000185803	SLC52A2	0.256738	0	9.26232	0	0	0
ENST00000308664	ENSG00000174437	ATP2A2	0.108365	0.192889	9.18707	1.27317	1.22611	0.174118
ENST00000409800	ENSG00000180398	MCFD2	0	0.045104	8.95485	0.014857	0	0.0939
ENST00000392249	ENSG00000082146	STRADB	0.142391	0.130941	8.53851	0.20235	4.77091	0.138291
ENST00000620996	ENSG00000009844	VTA1	1.01697	1.78087	8.462	1.65986	0.805955	1.33372
ENST00000435120	ENSG00000089693	MLF2	0.193293	0.004269	8.23489	0.366431	0.111527	0.370723
ENST00000613283	ENSG00000136997	MYC	0.282125	0.125282	8.20907	0.209098	0.13585	0.528421
ENST00000508076	ENSG00000120708	TGFBI	0.455863	2.74802	7.9486	0.971799	0.812423	0
ENST00000535425	ENSG00000284194	SCO2	0	0	7.82672	0.033252	0	3.97718
ENST00000415148	ENSG00000026508	CD44	0.081748	0.032661	7.70484	0.103151	0.115396	0.078438
ENST00000569451	ENSG00000127554	GFER	0	0	7.58031	0	0.989724	0
ENST00000536860	ENSG00000165304	MELK	0.966553	0.194639	7.55696	0.373757	0.218756	1.27556
ENST00000524370	ENSG00000080823	MOK	0.18095	0.852891	7.5346	0.473797	0.386346	2.40023
ENST00000492396	ENSG00000114209	PDCD10	0.003736	0.00403	7.42936	0.017456	0.000384	0.022253
ENST00000579039	ENSG00000266412	NCOA4	0.143079	3.45388	7.40214	1.53184	0.505965	2.45504
ENST00000622786	ENSG00000089737	DDX24	1.1e-05	4.6e-05	7.35127	4e-05	2e-05	2.2e-05
ENST00000474701	ENSG00000171848	RRM2	2.31762	1.49246	7.23667	1.34476	0.752511	1.47577
ENST00000412128	ENSG00000187514	PTMA	0	0	7.18845	0	2.43573	0
ENST00000442050	ENSG00000151465	CDC123	0	0	7.08268	0	0	0
ENST00000329214	ENSG00000185298	CCDC137	1.03836	0.446205	7.03738	0.743019	2.08663	1.16128
ENST00000371069	ENSG00000116675	DNAJC6	0.001749	1.81038	6.75225	4.7e-05	0.001385	0.003896
ENST00000296484	ENSG00000164087	POC1A	0.392084	0.176502	6.22492	0.826592	0.270547	0.180708
ENST00000535032	ENSG00000141219	C17orf80	0.019186	3.80881	6.21101	0.002707	0.011129	0.000406
ENST00000645845	ENSG00000177189	RPS6KA3	2.49708	0.815322	6.14578	0.629402	0.879673	1.19435
ENST00000372389	ENSG00000171453	POLR1C	0.408646	0.751111	6.14492	1.67054	0.906511	1.38503
ENST00000430088	ENSG00000185825	BCAP31	1.42375	1.21495	5.9956	0.362432	2.33047	1.35154
ENST00000341222	ENSG00000003402	CFLAR	0.368852	4.40777	5.96292	0.273945	0.198682	0.249242
ENST00000460088	ENSG00000090266	NDUFB2	0.358144	1.32965	5.9535	0	0.684626	2.89699
ENST00000423113	ENSG00000150093	ITGB1	0.00726	0.012443	5.91973	0.00302	0.001129	0.003244
ENST00000424085	ENSG00000134644	PUM1	0	0	5.7936	0.112413	0	0
ENST00000371509	ENSG00000116171	SCP2	0.571259	0	5.67347	2.56089	0	0
ENST00000527014	ENSG00000151348	EXT2	0.255618	0.174411	5.56172	0.42962	0.290854	0
ENST00000622669	ENSG00000118855	MFSD1	0.481415	0.858569	5.51804	0.239314	0.546623	0.321195
ENST00000358548	ENSG00000101150	TPD52L2	0	0	5.44549	0	0	0
ENST00000370834	ENSG00000117054	ACADM	0	0	5.41517	0	0	0
ENST00000369556	ENSG00000164414	SLC35A1	0.623448	1.05875	5.40542	0.283347	0.079841	0.072359
ENST00000646299	ENSG00000174099	MSRB3	0.226859	0.361214	5.3771	0.332515	0.782648	0.376948
ENST00000339497	ENSG00000108100	CCNY	0.139064	0	5.20186	0.041924	0.097816	0.131553
ENST00000356082	ENSG00000196878	LAMB3	0.259604	1.86509	5.1621	2.57912	0.660982	0.36679
ENST00000389858	ENSG00000205213	LGR4	2.02753	0.534011	5.15605	1.13518	0.864192	0.880187
ENST00000590868	ENSG00000141452	RMC1	0	0	5.15091	0	1.39678	0
ENST00000343315	ENSG00000120802	TMPO	0.368894	0.205852	5.10598	0.559657	0.419876	0.447188
ENST00000638937	ENSG00000082212	ME2	0.151728	0.001566	5.07421	0.540651	2.50906	0.005281
ENST00000559158	ENSG00000185787	MORF4L1	0	0	5.04104	0.393318	1.32401	0.004876
ENST00000400556	ENSG00000154845	PPP4R1	0.58292	0.155127	5.02737	0.713454	0.635244	0.518081
ENST00000536831	ENSG00000052749	RRP12	0	0	4.75185	0	0	0.000373
ENST00000396472	ENSG00000151327	FAM177A1	0	0	4.71342	0	0	0.009441
ENST00000518041	ENSG00000168802	CHTF8	0	0	4.61277	0	0	0
ENST00000354586	ENSG00000198252	STYX	0.12874	0.15803	4.59752	0.157451	0.068416	0.214581
ENST00000188376	ENSG00000075415	SLC25A3	0.339469	0.465515	4.50909	0.663188	0.66155	0.463421
ENST00000455106	ENSG00000141756	FKBP10	0.016039	0.004336	4.46603	0.665747	0.473007	0.270054
ENST00000611208	ENSG00000134108	ARL8B	0	0.140358	4.39555	0.541582	0.000632	0.000488
ENST00000415822	ENSG00000118855	MFSD1	0.466291	0.549331	4.18868	0.2417	0.52964	0.282555
ENST00000373511	ENSG00000119487	MAPKAP1	0.261608	0.638436	4.11433	0.742958	1.19636	0.753168
ENST00000368902	ENSG00000163156	SCNM1	0.913163	0.423351	4.0911	0.787839	0.81797	0.27703
ENST00000650089	ENSG00000101310	SEC23B	1.9296	0.858648	4.08705	0.505048	0.412989	0.430004
ENST00000264203	ENSG00000077549	CAPZB	0.01734	0	3.89289	0.001433	0.0098	0.001801
ENST00000615907	ENSG00000101150	TPD52L2	0.700758	0.901857	3.85386	0.676474	1.11682	0.859357
ENST00000396271	ENSG00000107897	ACBD5	0.205294	0.540079	3.85199	0.202465	1.54826	0.19755
ENST00000347642	ENSG00000013561	RNF14	0.550703	0.215291	3.79513	0.210432	0	0
ENST00000453295	ENSG00000117859	OSBPL9	0.193147	2.50433	3.78016	0.207682	0.182799	0.575643
ENST00000409171	ENSG00000173744	AGFG1	0.131106	0.238651	3.73269	1.39355	0.109823	0.121786
ENST00000642653	ENSG00000143179	UCK2	0.872537	0.462373	3.72146	0.333019	0.449759	0.174867
ENST00000391831	ENSG00000204673	AKT1S1	0.053455	0.0192	3.71083	0.048349	0.053486	0.045106
ENST00000539476	ENSG00000174238	PITPNA	0.304504	0.061482	3.70157	0	0.021796	0
ENST00000534641	ENSG00000110768	GTF2H1	0	0	3.58439	0	0	0
ENST00000539416	ENSG00000119408	NEK6	0.006274	0.004027	3.58347	0.007158	0.003007	0.000228
ENST00000613315	ENSG00000143569	UBAP2L	0.50731	1.41213	3.5455	0.083942	0.010869	0.609801
ENST00000431421	ENSG00000177565	TBL1XR1	0.357616	0.40525	3.51588	0.239728	0.118392	0.031973
ENST00000415017	ENSG00000117519	CNN3	0.134532	1.04578	3.50897	0.33405	0.954053	0.399628
ENST00000562997	ENSG00000067225	PKM	0.017368	0.002955	3.47509	0.018056	0.009856	0.028183
ENST00000509800	ENSG00000123737	EXOSC9	0.078889	0	3.46177	0.360744	0.72921	0.694898
ENST00000495603	ENSG00000114650	SCAP	0.417507	0.221955	3.44361	0.27281	0.282704	0.412446
ENST00000000412	ENSG00000003056	M6PR	0.000301	0.9386	3.41328	0.528168	0.741129	0.251847
ENST00000652222	ENSG00000013375	PGM3	0	0	3.40705	0	0	0
ENST00000456711	ENSG00000148444	COMMD3	0	1.18835	3.40558	0	0	0
ENST00000525713	ENSG00000117640	MTFR1L	0	1.59983	3.35995	0	0	0
ENST00000636120	ENSG00000113448	PDE4D	0.005247	0.000711	3.29588	0.000785	0.003104	0.008336
ENST00000652131	ENSG00000136997	MYC	0.007813	0.13181	3.21968	0.100949	0.142807	0.038952
ENST00000451652	ENSG00000119333	WDR34	0.053504	0.303573	3.1506	0.43254	0.3855	0.273535
ENST00000302528	ENSG00000130779	CLIP1	0.166577	1.34676	3.13458	0.242939	0.391022	0
ENST00000593892	ENSG00000178980	SELENOW	0	0	3.11118	1.52667	0	0
ENST00000431882	ENSG00000136197	C7orf25	0.001024	0.001418	3.05001	0.002001	0.003511	0.002143
ENST00000473835	ENSG00000163714	U2SURP	0.722793	0.484846	3.05001	0.645418	0.661809	0.442553
ENST00000549135	ENSG00000205352	PRR13	0.199133	0	3.03724	0.249432	0	0.163309
ENST00000370867	ENSG00000162623	TYW3	0.574709	0.686165	3.03363	0.65616	0.836849	0.350732
ENST00000644191	ENSG00000170445	HARS	0.372474	0.229535	3.01271	0.179593	0.232052	0.288853
ENST00000564543	ENSG00000260272	AC093525.2	0.339134	0	3.00817	0	0	0.128423
ENST00000356080	ENSG00000148700	ADD3	0.73119	0.531748	2.99789	0.694145	0.831921	0.568773
ENST00000264169	ENSG00000115947	ORC4	0.0398	0.016907	2.99586	0.019475	0.033498	0.165582
ENST00000627285	ENSG00000162065	TBC1D24	0.800587	0	2.93901	0.186032	0.276308	0.408024
ENST00000399697	ENSG00000186184	POLR1D	0	0.751895	2.93845	1.55785	0.801485	0.046564
ENST00000530109	ENSG00000104529	EEF1D	0.014746	0.024526	2.90935	0.066213	0.042581	0.073646
ENST00000627585	ENSG00000064419	TNPO3	0.031795	0.008518	2.90198	0.059437	1.58434	0.065285
ENST00000503788	ENSG00000145495	2021-03-06	0	0	2.87015	0	0.683614	0
ENST00000268171	ENSG00000140564	FURIN	0	1.19973	2.83803	1.15513	0	0.738888
ENST00000532634	ENSG00000137216	TMEM63B	0.000446	0.006797	2.80652	0.28094	0.012034	0.603469
ENST00000416496	ENSG00000165891	E2F7	0.169383	0.114221	2.79227	0.103647	0.066103	0.297155
ENST00000431350	ENSG00000198586	TLK1	0.180518	0.937416	2.77501	0.274076	0.768224	0.282057
ENST00000592528	ENSG00000105355	PLIN3	0.339505	0.267688	2.75756	0.250901	0.537364	0
ENST00000339012	ENSG00000163001	CFAP36	0.017272	0.027215	2.72589	0.0029	0	0.015005
ENST00000646932	ENSG00000136143	SUCLA2	0.005336	0.051675	2.67326	0.055331	0.255005	0.155929
ENST00000453840	ENSG00000188529	SRSF10	0.473698	0.459895	2.66418	0.35619	0.503253	0.547183
ENST00000262293	ENSG00000068489	PRR11	0.433011	0.90524	2.6532	0.646935	0.01224	0.022923
ENST00000305138	ENSG00000152942	RAD17	0.102595	0.037715	2.64959	0.072714	0.097195	0.074158
ENST00000649295	ENSG00000120265	PCMT1	0.22642	0.49906	2.56728	0.295213	0.203579	0.194779
ENST00000515001	ENSG00000153044	CENPH	0.223991	0.338087	2.55245	0.355507	0.347517	0.355014
ENST00000549740	ENSG00000205352	PRR13	0.174039	1.00182	2.51242	0.639104	0.290195	0.284679
ENST00000379983	ENSG00000137831	UACA	0.123655	0.0578	2.45832	0.212536	0.307542	0.260305
ENST00000532636	ENSG00000109971	HSPA8	0	0	2.39024	0	0.024502	0.10974
ENST00000625464	ENSG00000156531	PHF6	0.36152	0.098105	2.37587	0.042834	0.24786	0.417953
ENST00000616406	ENSG00000108219	TSPAN14	0	0.027819	2.37546	0.049132	0.004295	0
ENST00000652342	ENSG00000162775	RBM15	0.000129	0.000333	2.33302	0.000599	0.000584	0.000453
ENST00000340169	ENSG00000121897	LIAS	0	0.451844	2.26393	0.426367	1.2401	0
ENST00000372654	ENSG00000066136	NFYC	0.008594	0.1053	2.22149	0.004851	0.027693	0.011092
ENST00000407249	ENSG00000248333	CDK11B	0.256948	0.004114	2.22011	0	0.043116	0.310358
ENST00000438284	ENSG00000196639	HRH1	0.100743	0.230653	2.13601	0	0.31039	0.008376
ENST00000464889	ENSG00000120265	PCMT1	0.451395	0.026187	2.1225	0.412397	0.294692	0.411435
ENST00000619085	ENSG00000213654	GPSM3	0	0	2.10811	0	0	0
ENST00000380244	ENSG00000089280	FUS	0.366669	0.373761	2.10278	0.098043	1.09362	0.070527
ENST00000610356	ENSG00000160439	RDH13	0.297678	0.135171	2.07298	0.090159	0.058783	0.885452
ENST00000512788	ENSG00000154277	UCHL1	0.258363	0.214315	2.06199	0.256029	0.162168	0.450384
ENST00000327064	ENSG00000142453	CARM1	0.146522	1.09112	2.05831	0.149707	0.449755	0.194478
ENST00000383826	ENSG00000114026	OGG1	0	0	2.03788	0	1.22844	0
ENST00000345633	ENSG00000165806	CASP7	0	0.711181	2.03786	0	0	0.171861
ENST00000486715	ENSG00000168827	GFM1	0.003323	0.370519	2.02774	0.693156	0.007366	0.745216
ENST00000536329	ENSG00000165304	MELK	0.248848	0.096532	1.98608	0.23115	0.288558	0.192019
ENST00000394709	ENSG00000126803	HSPA2	0	1.26113	1.94504	0	0	0.024307
ENST00000374804	ENSG00000001497	LAS1L	0	0	1.92433	0	0	0
ENST00000652592	ENSG00000157168	NRG1	0	0	1.90544	0	0	0
ENST00000361054	ENSG00000085433	WDR47	0	0	1.8833	0	0	0
ENST00000324052	ENSG00000174720	LARP7	0.281649	0.163179	1.8803	0.194964	0.159673	0.56508
ENST00000370663	ENSG00000129680	MAP7D3	0	0	1.8551	0	0	0
ENST00000651477	ENSG00000136122	BORA	0	0	1.84126	0	0	0
ENST00000394426	ENSG00000172819	RARG	0.064606	0.195318	1.83115	0.009317	0.020076	0.000578
ENST00000406374	ENSG00000069020	MAST4	0	1.09631	1.8167	0	0	0
ENST00000542657	ENSG00000176915	ANKLE2	0	0	1.81285	0.476602	0	0
ENST00000605750	ENSG00000188321	ZNF559	0	0	1.8128	0	0	0.044843
ENST00000452564	ENSG00000115020	PIKFYVE	0.569369	0.074728	1.8115	0.527014	0.14356	0.249541
ENST00000512635	ENSG00000164244	PRRC1	0	0	1.80083	0	0	0
ENST00000645353	ENSG00000101849	TBL1X	0.003327	0.216494	1.74278	0.015056	0.021771	0.224523
ENST00000559228	ENSG00000128923	MINDY2	0.195979	0.062478	1.72852	0.090075	0.173957	0.168179
ENST00000530605	ENSG00000172977	KAT5	0.02464	0.009806	1.71559	0	0	0
ENST00000586577	ENSG00000130176	CNN1	0.038305	0.120967	1.68853	0.053818	0.086653	0.056694
ENST00000396165	ENSG00000150527	MIA2	0	0.304583	1.68839	0.759218	0	0.001056
ENST00000618970	ENSG00000249915	PDCD6	0	0	1.66049	0	0	0
ENST00000368330	ENSG00000163374	YY1AP1	0.356345	0.188834	1.62683	0.183611	0.200727	0.15068
ENST00000471859	ENSG00000117410	ATP6V0B	0.394394	0.294801	1.61762	0.849136	0.240149	0.135374
ENST00000591746	ENSG00000101654	RNMT	0.323196	0.425608	1.59112	0.482268	0.269824	0.454466
ENST00000307633	ENSG00000170445	HARS	0.025844	0.005307	1.58887	0.000346	0	0.000256
ENST00000373742	ENSG00000134644	PUM1	0.219439	0.251193	1.56528	0.247546	0.80809	0.180026
ENST00000394943	ENSG00000050405	LIMA1	0.255292	0.270736	1.55252	0.083154	0.246884	0.228689
ENST00000598168	ENSG00000131408	NR1H2	0.264875	0	1.54127	0	0.157993	0
ENST00000502871	ENSG00000138756	BMP2K	0.095101	0.440339	1.54003	0.352824	0.285958	0.71105
ENST00000472505	ENSG00000117410	ATP6V0B	0.139911	0.730753	1.53977	0.271722	0.252786	0
ENST00000456643	ENSG00000135046	ANXA1	0.182547	0.317578	1.52315	0.182967	0.733998	0.343151
ENST00000503130	ENSG00000197894	ADH5	0	0.447015	1.51332	0	0	0
ENST00000324894	ENSG00000130299	GTPBP3	0.044982	0.065557	1.48606	0.057964	0.064569	0.073996
ENST00000448568	ENSG00000168000	BSCL2	0.020993	0.343524	1.48289	0.453967	0	0.062672
ENST00000570798	ENSG00000189067	LITAF	0.073274	0.307593	1.47888	0.185088	0.486536	0.200414
ENST00000488246	ENSG00000203705	TATDN3	0.145867	0.211516	1.47366	0.069719	0.102236	0.65899
ENST00000376040	ENSG00000135040	NAA35	0.008769	0	1.45904	0.005819	0.008556	0.012049
ENST00000541515	ENSG00000269955	FMC1-LUC7L2	0	0	1.45718	0	0	0
ENST00000560389	ENSG00000182718	ANXA2	0.10038	0.039573	1.44419	0	0.089863	0
ENST00000621674	ENSG00000142541	RPL13A	0.238131	0.08501	1.44378	0.171408	0.009328	0.039167
ENST00000432467	ENSG00000147383	NSDHL	0.001104	0.689138	1.44161	0.000797	0.002277	0.000269
ENST00000618940	ENSG00000006125	AP2B1	0.011863	0.000502	1.4168	0.005082	0.484599	0.216452
ENST00000540306	ENSG00000067596	DHX8	0.000717	0.030141	1.41498	0.078103	0.01833	0.020036
ENST00000556195	ENSG00000184990	SIVA1	0.033229	1.0498	1.41018	0.029407	0.043238	0.041139
ENST00000396154	ENSG00000083828	ZNF586	0.079688	0.067998	1.40688	0.12411	0.14792	0.269551
ENST00000518949	ENSG00000147677	EIF3H	0.004275	0.1597	1.38604	0.227847	0.079855	0.225407
ENST00000615940	ENSG00000184154	LRTOMT	0.037859	0.03674	1.37766	0.057704	0.071086	0.04551
ENST00000263121	ENSG00000099956	SMARCB1	0	0	1.3527	0	0	0
ENST00000414316	ENSG00000100129	EIF3L	0.008513	0.009304	1.35228	0.318593	0.117088	0.022127
ENST00000263981	ENSG00000109670	FBXW7	0.18642	0.199792	1.34183	0	0.308987	0.476819
ENST00000380774	ENSG00000152942	RAD17	0	0	1.3376	0	0	0
ENST00000645829	ENSG00000131269	ABCB7	0.28006	0.18954	1.33722	0.101627	0.12297	0.216678
ENST00000399207	ENSG00000185917	SETD4	0	1.02491	1.33479	0	0	0
ENST00000296799	ENSG00000214944	ARHGEF28	0.003957	0.184739	1.33289	0.552333	0.127427	0.007202
ENST00000528760	ENSG00000149257	SERPINH1	0	0	1.30021	0	0	0
ENST00000394370	ENSG00000145868	FBXO38	0.128581	0.118151	1.29836	0.146887	0.151134	0.131702
ENST00000566433	ENSG00000121281	ADCY7	0.118893	0.060732	1.28923	0.059251	0.036974	0.031318
ENST00000556511	ENSG00000140153	WDR20	0.46539	0.119716	1.27191	0	0	0.185018
ENST00000517439	ENSG00000175606	TMEM70	0	0.529016	1.26682	0.207909	0	0.12461
ENST00000529184	ENSG00000180773	SLC36A4	0	0	1.25241	0.22536	0.126475	0.105421
ENST00000295414	ENSG00000163249	CCNYL1	0.565986	0.161032	1.24841	0	0.168163	0.048413
ENST00000361582	ENSG00000198919	DZIP3	0.019043	0.017067	1.23922	0.010617	0.02892	0.011198
ENST00000532701	ENSG00000197601	FAR1	0.129559	0.134528	1.23096	0.167215	0.195282	0.110541
ENST00000546152	ENSG00000110107	PRPF19	0.04046	0.213107	1.23059	0.095309	0.436119	0.149451
ENST00000395069	ENSG00000178401	DNAJC22	0.163978	0	1.22393	0.478958	0	0
ENST00000401950	ENSG00000100330	MTMR3	0.038663	0.064873	1.22174	0.07152	0.054368	0.048722
ENST00000536461	ENSG00000127663	KDM4B	0.171156	0.142694	1.20138	0.041675	0.134107	0.230629
ENST00000480575	ENSG00000126953	TIMM8A	0.030536	0.046582	1.18198	0.02854	0.053514	0.108903
ENST00000646602	ENSG00000136143	SUCLA2	0.095383	0.10558	1.17472	0.136695	0.123716	0.180585
ENST00000547864	ENSG00000139637	C12orf10	0	0	1.17181	0	0	0
ENST00000513826	ENSG00000145868	FBXO38	0.07513	0.073877	1.16692	0.104471	0.092352	0.090699
ENST00000432649	ENSG00000115363	EVA1A	0.001052	0.002127	1.1655	0.001159	0.000877	0.000651
ENST00000546017	ENSG00000139112	GABARAPL1	0.424473	0.074556	1.16011	0	0.044634	0.245695
ENST00000494817	ENSG00000144827	ABHD10	0	0.058067	1.15783	0.088105	0.179318	0.091917
ENST00000354312	ENSG00000152942	RAD17	1e-06	0.004316	1.14747	0	0.017301	0
ENST00000369927	ENSG00000101150	TPD52L2	0.042877	0.126664	1.14478	0	0.098862	0.151292
ENST00000588699	ENSG00000089327	FXYD5	0	0	1.14023	0	0	0
ENST00000551541	ENSG00000177426	TGIF1	0.183128	0.1789	1.13708	0.049766	0.111601	0.238546
ENST00000604900	ENSG00000183283	DAZAP2	0	0	1.13708	0	0	0
ENST00000578621	ENSG00000177427	MIEF2	0.34969	0.139781	1.13526	0.053765	0.167017	0.295104
ENST00000410024	ENSG00000144524	COPS7B	0.245766	0.110028	1.13349	0.094236	0.134469	0.014057
ENST00000527800	ENSG00000166548	TK2	0.22988	0.199099	1.13147	0.165982	0.1905	0.257092
ENST00000367480	ENSG00000164506	STXBP5	0	0	1.12322	0	0	0
ENST00000591142	ENSG00000099875	MKNK2	0.032104	0.062301	1.1203	0.231289	0.002713	0.415701
ENST00000531224	ENSG00000029363	BCLAF1	0.120073	0.076368	1.11988	0.088202	0.078894	0.069828
ENST00000642543	ENSG00000124570	SERPINB6	0.18784	0.151137	1.11431	0.025992	0.116999	0.158342
ENST00000574763	ENSG00000189067	LITAF	0.178494	0.37434	1.10035	0.172768	0	0.036748
ENST00000512085	ENSG00000151881	TMEM267	0	0	1.09839	0	0	0.219198
ENST00000638458	ENSG00000102359	SRPX2	0.052847	0.055414	1.0955	0.00865	0.009799	0.043589
ENST00000521198	ENSG00000104205	SGK3	0.281011	0.294372	1.08417	0.128016	0.277446	0.297511
ENST00000521937	ENSG00000080823	MOK	0.182479	0.134467	1.08074	0.296813	0.211825	0.087251
ENST00000395458	ENSG00000178057	NDUFAF3	0.529137	0	1.07888	0	0.50905	0
ENST00000366855	ENSG00000026297	RNASET2	0	0.146006	1.06565	0	0	0.438263
ENST00000409311	ENSG00000169679	BUB1	0	0.332954	1.06365	0	0.336265	0
ENST00000636113	ENSG00000166689	PLEKHA7	0.108901	0.014073	1.05342	0.003247	0.005501	0.004322
ENST00000270617	ENSG00000142528	ZNF473	0.001116	0	1.04862	0	0.007308	0.000711
ENST00000320985	ENSG00000148516	ZEB1	0	0.033479	1.04291	0	0.026604	0.076095
ENST00000543216	ENSG00000147050	KDM6A	0.004761	0	1.04278	0.001758	0	0
ENST00000366848	ENSG00000185842	DNAH14	0.011516	0.698464	1.04115	0.191842	0.063131	0.016272
ENST00000367296	ENSG00000134369	NAV1	0.218626	0.022027	1.03814	0.005231	0.048186	0.040326
ENST00000591399	ENSG00000132471	WBP2	0.001768	0.325043	1.03789	0.530446	0.287036	0.022672
ENST00000402538	ENSG00000152689	RASGRP3	0.000171	0	1.03486	0	0	0.000318
ENST00000616833	ENSG00000102805	CLN5	0	0.200581	1.02489	0	0	0
ENST00000368346	ENSG00000116539	ASH1L	0.001998	0.003799	1.02201	0.002011	0	0.000735
ENST00000532544	ENSG00000085117	CD82	0.062125	0.018687	1.02035	0.014117	0.087174	0.471146
ENST00000596357	ENSG00000123815	COQ8B	0	0.275999	1.01956	0	0.38476	0.462235
ENST00000519980	ENSG00000123908	AGO2	0	0	1.00463	0	0	0
ENST00000574322	ENSG00000175826	CTDNEP1	0.123085	0.179245	1.00449	0.073049	0.069715	0.372153
ENST00000639704	ENSG00000172269	DPAGT1	0	0.443205	1.00411	0.141846	0	0.204587
ENST00000607788	ENSG00000108963	DPH1	0.256705	0	1.00393	0	0	0
ENST00000426628	ENSG00000158483	FAM86C1	0.085463	0.130322	1.00103	0	0.148016	0
ENST00000276935	ENSG00000178031	ADAMTSL1	0.182003	0.119337	0.987915	0.164239	0.093593	0.072923
ENST00000393486	ENSG00000135272	MDFIC	0.110251	0.001946	0.986894	0.081309	0.415533	0.002682
ENST00000453448	ENSG00000176407	KCMF1	0.097571	0.427511	0.977697	0.088151	0.167957	0.218526
ENST00000409064	ENSG00000115548	KDM3A	0	0.736421	0.95931	0	0	0
ENST00000530500	ENSG00000175224	ATG13	0.223677	0	0.953058	0	0	0
ENST00000615329	ENSG00000136643	RPS6KC1	0	0	0.943069	0	0	0
ENST00000556250	ENSG00000187790	FANCM	0	0	0.925617	0	0	0
ENST00000280285	ENSG00000150712	MTMR12	0	0.255106	0.912938	0	0	0.020418
ENST00000354268	ENSG00000163104	SMARCAD1	0.284885	0.216993	0.91289	0.143455	0.296691	0.146874
ENST00000424479	ENSG00000147535	PLPP5	0.006628	0.160585	0.909956	0.145174	0.004343	0.336795
ENST00000447441	ENSG00000114423	CBLB	0.001768	0.162403	0.900402	0.128286	0.009134	0.006183
ENST00000349999	ENSG00000010704	HFE	0	0.538272	0.891106	0.274648	0	0.051777
ENST00000393445	ENSG00000135945	REV1	0.131527	0.000143	0.888616	0.199164	0.185623	0.000204
ENST00000561661	ENSG00000140265	ZSCAN29	0.03628	0.106244	0.886252	0.133961	0.139781	0.136037
ENST00000639955	ENSG00000089818	NECAP1	0	0	0.86917	0.179196	0	0
ENST00000356253	ENSG00000153956	CACNA2D1	0.226611	0.001696	0.866257	0.115043	0.070212	0.144025
ENST00000545289	ENSG00000249459	ZNF286B	0.065631	0.176268	0.860085	0.000301	0	0
ENST00000540054	ENSG00000077458	FAM76B	0.428264	0.265687	0.845373	0.128636	0.004554	0.002324
ENST00000628216	ENSG00000125846	ZNF133	0.076769	0.410928	0.838772	0.101364	0.284083	0
ENST00000651323	ENSG00000178971	CTC1	0.044473	0.000256	0.83641	0.000196	0.000297	0.382034
ENST00000367733	ENSG00000197959	DNM3	0.228326	0.440696	0.829568	0.033417	0.049601	0.012701
ENST00000298048	ENSG00000165304	MELK	0.191234	0.211436	0.817426	0.139914	0.21001	0.194444
ENST00000511812	ENSG00000205571	SMN2	0.110021	0.112324	0.813588	0.16898	0.077984	0.168075
ENST00000414982	ENSG00000032444	PNPLA6	0	0	0.800066	0.04683	0	0
ENST00000639100	ENSG00000175193	PARL	0	0	0.798651	0	0	0
ENST00000535373	ENSG00000115947	ORC4	0.052668	0.100605	0.796487	0.10733	0.058343	0.214645
ENST00000607452	ENSG00000170634	ACYP2	4e-06	0	0.791025	0	0	0
ENST00000170630	ENSG00000077238	IL4R	0.046332	0.060547	0.786529	0	0.113251	0
ENST00000376673	ENSG00000139793	MBNL2	0	0	0.779645	0	0.195879	0.198052
ENST00000423959	ENSG00000185010	F8	0.126214	0	0.768051	0	0	0
ENST00000483348	ENSG00000163950	SLBP	0.142129	0.169144	0.767807	0.183872	0.240292	0.174509
ENST00000415251	ENSG00000006576	PHTF2	0.010491	0.009438	0.764522	0.003637	0.005669	0.003296
ENST00000396941	ENSG00000100897	DCAF11	0.069598	0.07696	0.761884	0.083354	0.087719	0.078513
ENST00000417330	ENSG00000130429	ARPC1B	0	0	0.753298	0	0	0
ENST00000540442	ENSG00000115947	ORC4	0.050214	0.055899	0.752929	0.098488	0.090818	0.137092
ENST00000599006	ENSG00000167487	KLHL26	0	0	0.750596	0	0	0
ENST00000558762	ENSG00000140443	IGF1R	0	0	0.747045	0	0.119398	0
ENST00000264501	ENSG00000138688	KIAA1109	0	0	0.740276	0	0	0
ENST00000545680	ENSG00000110200	ANAPC15	0.026285	0.013975	0.737946	0.017983	0.00274	0.228211
ENST00000593920	ENSG00000171574	ZNF584	0.109819	0.248944	0.737888	0.013116	0.135179	0.045275
ENST00000644873	ENSG00000168036	CTNNB1	0	0	0.729158	0	0	0.200756
ENST00000333425	ENSG00000140451	PIF1	0	0	0.7287	0	0	0
ENST00000533432	ENSG00000159176	CSRP1	0.203489	0.17886	0.719196	0.055106	0.248811	0.077213
ENST00000317538	ENSG00000163867	ZMYM6	0.200316	0.131522	0.718851	0.058031	0.114199	0.158886
ENST00000615152	ENSG00000171848	RRM2	0.045757	0.038037	0.716458	0.046096	0.042385	0.055104
ENST00000495038	ENSG00000105948	TTC26	0.267003	0.009069	0.709909	0	0.336704	0
ENST00000535237	ENSG00000047932	GOPC	0.002683	0.172834	0.709612	0.201279	0.122451	0.161472
ENST00000361361	ENSG00000160767	FAM189B	0.336838	0.122485	0.709357	0.233625	0.059592	0.028659
ENST00000530436	ENSG00000166788	SAAL1	0.13546	0	0.703807	0.024644	0.056459	0.190087
ENST00000448382	ENSG00000121716	PILRB	0.173956	0	0.701619	0	0.062408	0.108128
ENST00000509708	ENSG00000145741	BTF3	0	0	0.700596	0	0	0
ENST00000528251	ENSG00000259112	NDUFC2-KCTD14	0	0	0.698315	0	0	0
ENST00000344749	ENSG00000071564	TCF3	0.090968	0.086629	0.684375	0.035298	0.035801	0.23582
ENST00000431330	ENSG00000170445	HARS	0.002752	0.000421	0.680347	7.8e-05	0.000104	0.000286
ENST00000262052	ENSG00000110911	SLC11A2	0.000384	0.268875	0.678774	0.000533	0.063815	0.190547
ENST00000310823	ENSG00000151694	ADAM17	0	0.523545	0.676395	0	0	0
ENST00000391947	ENSG00000198625	MDM4	0.001623	0.051122	0.673444	0.00026	4.5e-05	0.012144
ENST00000358931	ENSG00000068903	SIRT2	0.110284	0.089955	0.668888	0.089172	0.017996	0.106081
ENST00000643996	ENSG00000112855	HARS2	0	0	0.665845	0	0.222778	0
ENST00000358791	ENSG00000124243	BCAS4	0.217247	0.10801	0.6648	0.002561	0.160411	0.06739
ENST00000510316	ENSG00000171617	ENC1	0	0	0.662576	0	0	0
ENST00000570778	ENSG00000176845	METRNL	0.004649	0.020578	0.661643	0.025265	0.036202	0.023028
ENST00000323443	ENSG00000180979	LRRC57	0.295085	0.052818	0.659874	0.106268	0.102921	0.062348
ENST00000645071	ENSG00000136869	TLR4	0.02616	0.049826	0.659141	0.117994	0.035897	0.055392
ENST00000560369	ENSG00000137821	LRRC49	0.043539	0.139355	0.658719	0.469641	0	0.001176
ENST00000377921	ENSG00000148484	RSU1	0.117582	0.113804	0.656436	0.11972	0.12359	0.093001
ENST00000451692	ENSG00000147050	KDM6A	0.026645	0.000943	0.652258	0.000781	0.001399	0.00076
ENST00000370713	ENSG00000117114	ADGRL2	0	0	0.651293	0	0	0
ENST00000503752	ENSG00000164306	PRIMPOL	0.018402	0.016455	0.651101	0.010548	0.035536	0.011552
ENST00000646124	ENSG00000099949	LZTR1	0.095982	0.145415	0.645247	0.207887	0.090767	0.207059
ENST00000326470	ENSG00000084112	SSH1	0.003221	0.009328	0.643896	0.00053	0	0.003325
ENST00000332592	ENSG00000150401	DCUN1D2	0	0	0.643878	0	0	0
ENST00000393271	ENSG00000154920	EME1	0	0	0.637886	0.008984	0	0.078357
ENST00000434295	ENSG00000101353	MROH8	0.145964	0.058769	0.631935	0	0	0
ENST00000525994	ENSG00000089597	GANAB	0	0.288283	0.627556	0	0	0
ENST00000442995	ENSG00000242028	HYPK	0.043419	0.339904	0.620101	0.029429	0.044799	0.035744
ENST00000375838	ENSG00000116138	DNAJC16	0.07832	0.058904	0.615819	0.003529	0.028001	0.069224
ENST00000375779	ENSG00000213719	CLIC1	0	0	0.607915	0	0.00154	0.001071
ENST00000528036	ENSG00000184363	PKP3	0.007225	0.045803	0.605431	0.008144	0.039892	0.017743
ENST00000332070	ENSG00000156531	PHF6	0.242726	0.012072	0.603942	0.039896	0.004992	0.092929
ENST00000441310	ENSG00000064933	PMS1	3.3e-05	0.243052	0.603498	1e-06	0.000524	0.196108
ENST00000584103	ENSG00000072778	ACADVL	0.136776	0	0.603131	0	0.148694	0
ENST00000502690	ENSG00000109332	UBE2D3	0	0	0.599593	0	0	0
ENST00000366686	ENSG00000154429	CCSAP	0.003492	0	0.594975	0.00159	0	0.003049
ENST00000543485	ENSG00000087245	MMP2	0.22927	0.203206	0.591578	0.001696	0.121526	0.004152
ENST00000317350	ENSG00000170525	PFKFB3	0.005448	0.003125	0.583728	0	0.180737	0
ENST00000415210	ENSG00000143753	DEGS1	0	0	0.583227	0	0	0.172285
ENST00000638936	ENSG00000197563	PIGN	0	0.152518	0.583084	0.245367	0	0.181995
ENST00000608657	ENSG00000082781	ITGB5	0	0	0.57739	0	0	0
ENST00000547838	ENSG00000198324	PHETA1	0	0.003686	0.575978	0	0.002198	0.002174
ENST00000565765	ENSG00000140950	MEAK7	0	0.217833	0.56836	0	0	0.138588
ENST00000372159	ENSG00000125485	DDX31	0.053445	0.037224	0.565917	0.097921	0.026101	0.029441
ENST00000367030	ENSG00000196878	LAMB3	0	0.008169	0.563141	0	0.001012	0
ENST00000544914	ENSG00000181666	HKR1	0	0	0.561604	0.109853	0.117377	0.048243
ENST00000455470	ENSG00000151835	SACS	0	0	0.554037	0	0	0
ENST00000359860	ENSG00000172661	WASHC2C	0.041001	0.274273	0.544602	0.046798	0.102075	0.026526
ENST00000476058	ENSG00000089091	DZANK1	0	0	0.544311	0	0.143064	0
ENST00000343533	ENSG00000165240	ATP7A	0.106295	0.127914	0.543856	0	0.003323	0.382378
ENST00000547178	ENSG00000083454	P2RX5	0.142825	0.030411	0.542268	0.128251	0.007402	0.024317
ENST00000366508	ENSG00000153207	AHCTF1	0.006821	0.001218	0.527846	0.002395	0.001591	0.002997
ENST00000522304	ENSG00000025770	NCAPH2	0	0.442771	0.519903	0	0	0
ENST00000539594	ENSG00000173153	ESRRA	0	0.150219	0.516699	0.047988	0.242261	0.092993
ENST00000570125	ENSG00000153048	CARHSP1	0	0.114081	0.51436	0.024145	0.044329	0
ENST00000378330	ENSG00000167522	ANKRD11	0	0.183036	0.510104	0.001799	0	0
ENST00000632897	ENSG00000256671	LIMS4	0	0.155515	0.506413	0.232349	0	0.208338
ENST00000567730	ENSG00000070770	CSNK2A2	0	0	0.505646	0	0	0
ENST00000545812	ENSG00000149743	TRPT1	0	0.014478	0.505089	0.006834	0.183505	0.012763
ENST00000512960	ENSG00000077684	JADE1	0.046202	0.103351	0.499633	0.082162	0.08589	0.18665
ENST00000631280	ENSG00000079134	THOC1	0	0	0.496204	0	0	0
ENST00000406921	ENSG00000198399	ITSN2	0.002203	0	0.490188	0.081557	0.0023	0.042824
ENST00000341060	ENSG00000111802	TDP2	0	0.297102	0.484406	0	0	0
ENST00000648982	ENSG00000164619	BMPER	0	0	0.482714	0	0	0
ENST00000286544	ENSG00000156050	FAM161B	0.174006	0.071124	0.481855	0.151485	0.034653	0.086817
ENST00000577538	ENSG00000215421	ZNF407	0.098585	0.034303	0.481164	0.011459	0.034791	0.178854
ENST00000358156	ENSG00000161547	SRSF2	0	0	0.479861	0	0	0
ENST00000347140	ENSG00000179912	R3HDM2	0	0.000149	0.477794	0.000795	0.004409	0.000842
ENST00000613797	ENSG00000136122	BORA	0.003066	0.002466	0.471506	0.009067	0.001179	0.017098
ENST00000506585	ENSG00000165259	HDX	0	0.061501	0.471399	0	0	0.196614
ENST00000563799	ENSG00000103034	NDRG4	0	0	0.468121	0	0	0
ENST00000557020	ENSG00000198668	CALM1	0	0	0.467065	0	0	0
ENST00000339728	ENSG00000188042	ARL4C	0.002794	0.003377	0.46552	0.004315	0.003556	0.004987
ENST00000579935	ENSG00000268043	NBPF12	0.101565	0.030987	0.464471	0.125032	0.037033	0
ENST00000375066	ENSG00000095383	TBC1D2	0	0	0.461064	0	0	0
ENST00000482824	ENSG00000169814	BTD	0	0.130266	0.460848	0	0.21319	0
ENST00000404158	ENSG00000167491	GATAD2A	0.061696	0.068933	0.457921	0.034079	0.040599	0.094412
ENST00000599910	ENSG00000011451	WIZ	0.009922	0.004047	0.452468	0.005795	0.01163	0.01262
ENST00000398564	ENSG00000104728	ARHGEF10	0	0	0.449604	0	0	0.148704
ENST00000566871	ENSG00000140939	AC074143.1	0.000384	0.131451	0.444931	0.154842	0.252633	0
ENST00000445776	ENSG00000159352	PSMD4	0.116356	0.092108	0.444082	0	0.118805	0
ENST00000602849	ENSG00000162775	RBM15	0.000134	0.001308	0.443109	0.000558	0.000642	0.000468
ENST00000586826	ENSG00000175832	ETV4	0.03747	0.186886	0.442576	0.185682	0.023052	0.013763
ENST00000561769	ENSG00000138614	INTS14	0.037239	0.206389	0.442472	0	0	0.198651
ENST00000551525	ENSG00000127329	PTPRB	0.186608	0.037629	0.442013	0.010855	0.001998	0.090407
ENST00000368368	ENSG00000160767	FAM189B	0	0.00404	0.44172	0.011124	0.053722	0.000188
ENST00000618425	ENSG00000140987	ZSCAN32	0.001046	0	0.440479	0.022864	0.024611	0.000868
ENST00000593181	ENSG00000092931	MFSD11	0.034215	0.051732	0.434562	0.017538	0	0.233584
ENST00000597013	ENSG00000204611	ZNF616	0.082354	0.089879	0.433992	0.115239	0.120171	0.035482
ENST00000379937	ENSG00000185024	BRF1	0	0	0.432279	0	0.267966	0
ENST00000342045	ENSG00000158019	BABAM2	0.055013	0.036167	0.431222	0.091996	0.091748	0.083026
ENST00000359210	ENSG00000058600	POLR3E	0	0.148794	0.42737	0	0.10948	0
ENST00000341472	ENSG00000054654	SYNE2	0.014031	0	0.425307	0.004188	0.000896	0.008051
ENST00000555997	ENSG00000185650	ZFP36L1	0.042825	0.041391	0.424942	0.040304	0.041355	0.047397
ENST00000393706	ENSG00000136877	FPGS	0.057703	0.049217	0.424744	0.07567	0.110083	0.079599
ENST00000295488	ENSG00000163312	HELQ	0.009225	0.009428	0.42367	0.008414	0.013418	0.093004
ENST00000614410	ENSG00000116127	ALMS1	0	0.305468	0.420034	0	0	0
ENST00000398389	ENSG00000161647	MPP3	0	0	0.417095	0	0	0
ENST00000417784	ENSG00000175193	PARL	0.011924	0.070463	0.415111	0.061904	0.010393	0.02823
ENST00000358913	ENSG00000138347	MYPN	0.119317	0.072677	0.414859	0	0.147163	0.077174
ENST00000376931	ENSG00000161010	MRNIP	0.044813	0.031452	0.414854	0	0.007096	0.033988
ENST00000425073	ENSG00000001631	KRIT1	0.027145	0	0.413895	0.053127	0	0
ENST00000293261	ENSG00000161558	TMEM143	0.11732	0.109737	0.411092	0.001684	0.204605	0.002264
ENST00000478746	ENSG00000026025	VIM	0.044414	0.042119	0.410669	0.174925	0.036011	0.049406
ENST00000555530	ENSG00000100462	PRMT5	0	0	0.408423	0	0	0
ENST00000409455	ENSG00000072163	LIMS2	0	0.061984	0.406147	0	0.123671	0.084059
ENST00000590602	ENSG00000141524	TMC6	0.009579	0.155047	0.404705	0.087966	0.014445	0.000155
ENST00000614574	ENSG00000241852	C8orf58	0.193402	0.066776	0.403446	0.047849	0.001618	0.002686
ENST00000592273	ENSG00000123144	TRIR	0	0.208191	0.40335	0	0	0
ENST00000368077	ENSG00000162734	PEA15	0	0	0.398561	0	0.035249	0
ENST00000533525	ENSG00000149256	TENM4	0.02874	0.040133	0.398477	0.019926	0.029287	0.061794
ENST00000409743	ENSG00000115661	STK16	0	0	0.396461	0	0	0
ENST00000507751	ENSG00000204536	CCHCR1	0	0.055206	0.395312	0	0	0
ENST00000532589	ENSG00000165490	DDIAS	0.156981	0.033792	0.392079	0	0.168913	0
ENST00000616409	ENSG00000104177	MYEF2	0	0.002092	0.392027	0.0004	0.00041	0
ENST00000446165	ENSG00000173875	ZNF791	0	0	0.390029	0	0	0
ENST00000457715	ENSG00000028839	TBPL1	0	0	0.384688	0	0	0
ENST00000392500	ENSG00000111860	CEP85L	0.030079	0	0.381887	0	0	0.153929
ENST00000502971	ENSG00000163629	PTPN13	0.061139	0.039574	0.381798	0.10032	0.038334	0.08202
ENST00000260569	ENSG00000011523	CEP68	0	0	0.380311	0	0	0
ENST00000360957	ENSG00000104881	PPP1R13L	0.055712	0	0.378354	0.060868	0	0.07497
ENST00000464364	ENSG00000244038	DDOST	0	0	0.376143	0	0.156539	0
ENST00000443019	ENSG00000182378	PLCXD1	0.003607	0	0.36831	0	0	0
ENST00000352303	ENSG00000185627	PSMD13	0	0	0.364112	0	0	0.137347
ENST00000612675	ENSG00000132323	ILKAP	0	0	0.360799	0	0	0
ENST00000260983	ENSG00000138411	HECW2	0	0.043955	0.35753	0.171477	0	0.002392
ENST00000637342	ENSG00000162341	TPCN2	0	0	0.357498	0	0	0
ENST00000576010	ENSG00000174238	PITPNA	0	0.021939	0.357192	0	0.021481	0.025608
ENST00000450023	ENSG00000119013	NDUFB3	0	0.031084	0.354968	0	0	0
ENST00000634343	ENSG00000080503	SMARCA2	0.008303	0	0.354793	0.06141	0.034535	0.099376
ENST00000443535	ENSG00000170734	POLH	0.151599	0	0.353046	0	0.075838	0
ENST00000535772	ENSG00000186868	MAPT	0.14581	0.054541	0.351762	0.010739	0	0
ENST00000504986	ENSG00000109133	TMEM33	0.002927	0.002013	0.351667	0.002224	0.030232	0.032314
ENST00000611972	ENSG00000101150	TPD52L2	0	0.083657	0.349834	0.033377	0.108044	0.009237
ENST00000521607	ENSG00000164924	YWHAZ	0.156076	0.061466	0.34852	0.077758	0.048592	0.081369
ENST00000546897	ENSG00000170421	KRT8	0.039519	0.229079	0.347578	0	0	0
ENST00000342785	ENSG00000038427	VCAN	0	0.000174	0.343855	0	0	0
ENST00000563714	ENSG00000166912	MTMR10	0.038476	0	0.341108	0	0.034586	0.024012
ENST00000530304	ENSG00000165494	PCF11	0.002825	0.033027	0.339138	0.029306	0.046218	0.048747
ENST00000370300	ENSG00000135297	MTO1	0.149131	0.0538	0.337643	0	0	0
ENST00000354082	ENSG00000142330	CAPN10	0	0	0.336021	0	0	0
ENST00000405348	ENSG00000105974	CAV1	0	0	0.331818	0	0	0
ENST00000426655	ENSG00000135503	ACVR1B	0.009495	0.028306	0.330917	0.015405	0.066558	0.035034
ENST00000421516	ENSG00000172936	MYD88	0	0.10655	0.330258	0	0	0
ENST00000481827	ENSG00000107249	GLIS3	0.105789	0.032851	0.32956	0.024858	0	0.014573
ENST00000592261	ENSG00000123146	ADGRE5	0.048808	0.099628	0.325534	0.067897	0.094049	0
ENST00000405742	ENSG00000185339	TCN2	0	0	0.324901	0	0	0
ENST00000371994	ENSG00000107789	MINPP1	0.007304	0.009906	0.323863	0.004832	0.007116	0.012766
ENST00000591070	ENSG00000168517	HEXIM2	0.104282	0.087911	0.323466	0.008618	0	0
ENST00000403435	ENSG00000186575	NF2	0.035095	0.007385	0.322803	0.043017	0.020414	0.005859
ENST00000540801	ENSG00000141298	SSH2	0	0	0.320271	0.001648	0.039997	0.005609
ENST00000645407	ENSG00000100150	DEPDC5	0	0	0.318851	0	0	0.003325
ENST00000522403	ENSG00000101199	ARFGAP1	0.010691	0.003429	0.318702	0.035128	0.016501	0.015522
ENST00000594258	ENSG00000076928	ARHGEF1	0.068762	0.040202	0.318514	0.07417	0.035738	0.04735
ENST00000367470	ENSG00000157181	ODR4	0.009077	0.006949	0.316248	0.016718	0.027452	0.015609
ENST00000536215	ENSG00000155974	GRIP1	0.001311	0	0.314737	0	0	0
ENST00000443528	ENSG00000075624	ACTB	0.104928	0.127279	0.314489	0	0.078889	0
ENST00000489702	ENSG00000128604	IRF5	0	0	0.314457	0	0	0
ENST00000630983	ENSG00000186184	POLR1D	0	0.046586	0.312547	0.044648	0	0
ENST00000308862	ENSG00000115020	PIKFYVE	0.016898	0.002606	0.312048	0.010089	0	0.000704
ENST00000561518	ENSG00000205937	RNPS1	0.031854	0.100097	0.311935	0.065105	0.051963	0.139508
ENST00000474980	ENSG00000151665	PIGF	0.069563	0.127563	0.311386	0.003356	0.119367	0
ENST00000397498	ENSG00000214087	ARL16	0	0	0.306014	0	0	0
ENST00000557703	ENSG00000182199	SHMT2	0.042239	0	0.304984	0	0	0
ENST00000286628	ENSG00000156113	KCNMA1	0	0.106803	0.302977	0.009462	0	0.000669
ENST00000391338	ENSG00000153037	SRP19	0.125058	0.040227	0.299586	0.055299	0	0
ENST00000525303	ENSG00000196655	TRAPPC4	0	0	0.29887	0	0	0
ENST00000370788	ENSG00000151914	DST	0	0	0.298844	0	0	0
ENST00000648638	ENSG00000054118	THRAP3	0.067972	0.019743	0.298787	0.043975	0.064605	0.010283
ENST00000382865	ENSG00000130997	POLN	0	0	0.29835	0	0	0.089025
ENST00000402592	ENSG00000100003	SEC14L2	0	0	0.297348	0	0	0
ENST00000644159	ENSG00000109323	MANBA	0.000601	0.000288	0.296105	0.036389	0	0.109466
ENST00000531953	ENSG00000104529	EEF1D	0.079418	0	0.294984	0	0	0.048672
ENST00000529350	ENSG00000188997	KCTD21	0.092322	0.011754	0.292448	0.122229	0.001503	0
ENST00000552142	ENSG00000111145	ELK3	0.045054	0.085306	0.291088	0.232186	0	0
ENST00000415177	ENSG00000112339	HBS1L	0	0	0.290043	0	0	0
ENST00000271643	ENSG00000143382	ADAMTSL4	0.026193	0.054632	0.289065	0.009744	0.10136	0.042693
ENST00000263991	ENSG00000115504	EHBP1	0.002891	0.016019	0.287752	0.023124	0	0.001332
ENST00000505609	ENSG00000118816	CCNI	0	0.003896	0.285517	0.017361	0.021336	0.033389
ENST00000369039	ENSG00000143382	ADAMTSL4	0	0	0.285104	0	0	0
ENST00000446375	ENSG00000173852	DPY19L1	0.007812	0.065019	0.284269	0	0.053886	0
ENST00000395532	ENSG00000178188	SH2B1	0	0	0.281708	0	0	0
ENST00000522821	ENSG00000143643	TTC13	0	0	0.281416	0	0	0.024652
ENST00000541774	ENSG00000141736	ERBB2	0	0	0.280166	0	0	0
ENST00000542013	ENSG00000141127	PRPSAP2	0	0	0.27874	0	0	0
ENST00000532208	ENSG00000162194	LBHD1	0	0	0.276971	0	0	0
ENST00000455009	ENSG00000130429	ARPC1B	0.008616	0.04248	0.275022	0.033554	0.005214	0.006023
ENST00000569827	ENSG00000092529	CAPN3	3.5e-05	0	0.274817	0	0	0
ENST00000447974	ENSG00000184154	LRTOMT	0.032921	0.04314	0.274095	0	0.000273	0.048355
ENST00000429433	ENSG00000178409	BEND3	0.003247	0.001794	0.272781	0.000786	0.006609	0.003263
ENST00000409200	ENSG00000123342	MMP19	0.080547	0.034611	0.272116	0	0	0
ENST00000304920	ENSG00000172458	IL17D	0	0	0.270911	0	0	0
ENST00000539140	ENSG00000156171	DRAM2	1e-06	3.1e-05	0.2671	3.3e-05	9.7e-05	2e-05
ENST00000352159	ENSG00000026103	FAS	0	0.101987	0.266575	0	0.114494	0
ENST00000456676	ENSG00000076242	MLH1	0	0	0.266466	0	0	0
ENST00000450504	ENSG00000237649	KIFC1	0.03137	0.110744	0.265487	0	0.023633	0.033253
ENST00000504811	ENSG00000133835	HSD17B4	0	0.066742	0.264324	0.021084	0	0
ENST00000463295	ENSG00000132676	DAP3	0	0	0.263518	0	0	0
ENST00000503008	ENSG00000145416	2021-03-01	0	0.046318	0.263496	0.070399	0.020457	0.113646
ENST00000466508	ENSG00000049769	PPP1R3F	0.005381	0.015812	0.263069	0.005128	0.005487	0.003453
ENST00000569840	ENSG00000167889	MGAT5B	3.5e-05	0	0.260693	0	0	4.4e-05
ENST00000413191	ENSG00000081177	EXD2	0.040366	0	0.259326	0.054937	0	0.073096
ENST00000529361	ENSG00000205531	NAP1L4	0.01074	0	0.257143	0	0	0.01003
ENST00000418026	ENSG00000234127	TRIM26	0	0.051559	0.255678	0.114451	0.053665	0
ENST00000533054	ENSG00000154133	ROBO4	0	0	0.254192	0	0	0.090658
ENST00000630754	ENSG00000181090	EHMT1	0.050229	0.039245	0.253888	0.129306	0.0074	0.00342
ENST00000446440	ENSG00000110931	CAMKK2	0.024747	0	0.248897	0	0	0
ENST00000564529	ENSG00000140497	SCAMP2	0.03163	0.021694	0.246033	0.003458	0	0.031745
ENST00000445728	ENSG00000142528	ZNF473	0	0.132108	0.245468	0	0	0
ENST00000449211	ENSG00000144182	LIPT1	0.000319	0.000576	0.245461	6.9e-05	6.6e-05	0.000115
ENST00000340866	ENSG00000116791	CRYZ	0.049855	0.130371	0.244072	0.007192	0.01621	0.050323
ENST00000412135	ENSG00000068078	FGFR3	0	0	0.243555	0	0	0
ENST00000547072	ENSG00000135437	RDH5	0	0	0.243122	0.113391	0	0
ENST00000397338	ENSG00000152620	NADK2	0.010426	0.036269	0.242174	0.021164	0.034339	0.016382
ENST00000558850	ENSG00000022976	ZNF839	0	0	0.242063	0	0	0
ENST00000367204	ENSG00000143842	SOX13	0.061177	0.078495	0.241196	0.019384	0.020879	0.095141
ENST00000378543	ENSG00000162585	FAAP20	0.027252	0	0.23954	0.022822	0	0.079142
ENST00000582512	ENSG00000166685	COG1	0	0.197072	0.237796	0	0	0
ENST00000368385	ENSG00000163462	TRIM46	0.025763	0.029169	0.23767	0.056069	0.025737	0.04025
ENST00000512996	ENSG00000112992	NNT	0	0	0.237241	0	0	0
ENST00000649734	ENSG00000153214	TMEM87B	0	0	0.236727	0.000572	0	0.000139
ENST00000619992	ENSG00000106144	CASP2	0.043799	0.004595	0.236622	0.045298	0.008176	0.005324
ENST00000640533	ENSG00000109911	ELP4	0.058617	0.093548	0.23604	0	0.079854	0.012817
ENST00000448803	ENSG00000176371	ZSCAN2	0.0471	0.020717	0.234817	0.030479	0.026363	0.029382
ENST00000464375	ENSG00000075292	ZNF638	0.008557	0.005949	0.234457	5.1e-05	0.00358	4.6e-05
ENST00000424893	ENSG00000172936	MYD88	0.003131	0.022028	0.233547	0.076798	0.027785	0.00507
ENST00000441738	ENSG00000102265	TIMP1	0	0	0.231183	0.124712	0	0
ENST00000635377	ENSG00000101000	PROCR	0	0	0.225598	0	0	0
ENST00000413459	ENSG00000162066	AMDHD2	0.063052	0.059107	0.223777	0.001217	0.115097	0.004736
ENST00000393307	ENSG00000172780	RAB43	0	0	0.222576	0	0	0
ENST00000652626	ENSG00000061918	GUCY1B1	0.050302	0.002252	0.222422	0	0.012407	0.014755
ENST00000586380	ENSG00000105520	PLPPR2	0.05477	0.015628	0.22168	0.045692	0.039396	0.027788
ENST00000612520	ENSG00000271425	NBPF10	0	0.06201	0.220723	0.012653	0.103366	0.013433
ENST00000514694	ENSG00000280987	MATR3	0	0	0.218802	0	0	0
ENST00000644011	ENSG00000088836	SLC4A11	0.045452	0	0.217943	0	0	0
ENST00000617558	ENSG00000263020	AL662899.2	0.014802	0.076609	0.217045	0.011302	0.070526	0.046422
ENST00000602782	ENSG00000138744	NAAA	0	0	0.216239	0.088857	0	0
ENST00000534779	ENSG00000089597	GANAB	0	0	0.216164	0	0	0
ENST00000458574	ENSG00000143158	MPC2	0	0	0.216046	0	0.020531	0.013852
ENST00000456495	ENSG00000172113	NME6	0	0	0.215899	0	0	0
ENST00000427978	ENSG00000130529	TRPM4	0	0	0.215735	0	0	0
ENST00000535191	ENSG00000114904	NEK4	0	0	0.214434	0	0	0
ENST00000377776	ENSG00000133627	ACTR3B	0	0	0.21377	0	0	0.0229
ENST00000531934	ENSG00000124357	NAGK	0.126453	0.069714	0.21366	0.015418	0.017093	0
ENST00000403724	ENSG00000114423	CBLB	0.000351	0.060781	0.213277	0.000279	0.105034	0.056539
ENST00000376585	ENSG00000177000	MTHFR	0.0321	0.016318	0.213047	0.020516	0.044727	0.027868
ENST00000536859	ENSG00000168528	SERINC2	0.041643	0	0.212854	0	0	0
ENST00000647793	ENSG00000105825	TFPI2	0.032743	0.087928	0.212302	0	0.050196	0
ENST00000356654	ENSG00000111676	ATN1	0	0	0.210665	0	0	0
ENST00000369637	ENSG00000155366	RHOC	0	0	0.209732	0	0	0
ENST00000407877	ENSG00000064547	LPAR2	0	0.022036	0.209482	0	0	0
ENST00000593463	ENSG00000090006	LTBP4	0.079941	0.042453	0.208129	0	0.055672	0
ENST00000468539	ENSG00000167716	WDR81	0.091406	0.021166	0.207031	0.035146	0	0
ENST00000477279	ENSG00000055950	MRPL43	0.019104	0.12262	0.206832	0.002876	0.02445	0.019531
ENST00000455551	ENSG00000187764	SEMA4D	0.034639	0.026268	0.206651	0.017552	0.031913	0.034221
ENST00000539419	ENSG00000149485	FADS1	0	0.115137	0.206186	0	0	0.041866
ENST00000529284	ENSG00000126457	PRMT1	0	0.104783	0.204394	0.015899	0.042064	0
ENST00000424011	ENSG00000140931	CMTM3	0	0.130355	0.203595	0	0	0
ENST00000586257	ENSG00000132471	WBP2	0	0.035593	0.203395	0.112367	0	0
ENST00000007510	ENSG00000004777	ARHGAP33	0	0	0.203271	0	0.000557	0
ENST00000583874	ENSG00000265190	ANXA8	0.001793	0	0.201983	0.018445	0	0.000442
ENST00000643402	ENSG00000177189	RPS6KA3	0	0	0.201889	0	0	0
ENST00000379977	ENSG00000134470	IL15RA	0.06049	0.072103	0.201114	0.082076	0	0
ENST00000251157	ENSG00000116641	DOCK7	0.033826	0	0.199734	0	0.014909	0
ENST00000497473	ENSG00000134330	IAH1	0	0	0.199358	0	0.000144	0.010276
ENST00000343516	ENSG00000167971	CASKIN1	0.049036	0.019311	0.197241	0.004445	0	0.001707
ENST00000537728	ENSG00000033627	ATP6V0A1	0	0	0.197072	0	0	0
ENST00000372573	ENSG00000198815	FOXJ3	0.000519	0.112337	0.196973	0.002764	0	0
ENST00000367333	ENSG00000116857	TMEM9	0	0.087704	0.196318	0	0.066569	0.064011
ENST00000368198	ENSG00000027869	SH2D2A	0	0.045208	0.196064	0	0	0
ENST00000354891	ENSG00000164318	EGFLAM	0.002917	0	0.195995	0	0	0
ENST00000630422	ENSG00000133101	CCNA1	0.005831	0	0.195546	0.03992	0	0.008074
ENST00000507153	ENSG00000250298	GIMD1	0.01941	0.024082	0.195471	0	0	0
ENST00000368099	ENSG00000213085	CFAP45	0	0	0.195464	0	0	0
ENST00000602181	ENSG00000181027	FKRP	0	0	0.194653	0	0	0.044109
ENST00000510314	ENSG00000183624	HMCES	0	0	0.194537	0	0	0
ENST00000568162	ENSG00000169371	SNUPN	0	0	0.193746	0	0	0
ENST00000604872	ENSG00000109670	FBXW7	0.036016	0.033141	0.193558	0.068205	0.007341	0.04393
ENST00000551900	ENSG00000012822	CALCOCO1	0.032673	0	0.193395	0	0	0
ENST00000418463	ENSG00000070950	RAD18	0	0	0.192765	0	0	0
ENST00000301407	ENSG00000267631	CGB1	0.000222	0.000461	0.190161	0.021231	0.052281	0.006863
ENST00000393881	ENSG00000168256	NKIRAS2	0.017954	0.090144	0.189887	0.000189	0.00039	0.020358
ENST00000580030	ENSG00000108406	DHX40	0	0	0.189746	0	0	0
ENST00000422077	ENSG00000157036	EXOG	0.05367	0	0.189058	0	0	0
ENST00000611176	ENSG00000269335	IKBKG	0	0	0.188386	0	0	0
ENST00000413437	ENSG00000101811	CSTF2	0.013166	0.079357	0.188363	0.050971	0.040232	0.02708
ENST00000544152	ENSG00000136048	DRAM1	0	0	0.188325	0.025631	0	0
ENST00000291752	ENSG00000183668	PSG9	0	0	0.188275	0	0	0
ENST00000358808	ENSG00000130779	CLIP1	0.015146	0.111734	0.187857	0.019798	0.02528	0
ENST00000649479	ENSG00000100138	SNU13	0	0	0.187311	0	0	0
ENST00000452555	ENSG00000102100	SLC35A2	0.004752	0	0.187292	0	0.000918	0.003564
ENST00000584494	ENSG00000196704	AMZ2	0	0	0.187165	0.024463	0.00014	0
ENST00000442058	ENSG00000181135	ZNF707	0	0.036652	0.187033	0	0.026085	0
ENST00000546148	ENSG00000176371	ZSCAN2	0.000475	0.001108	0.185706	0.00021	0.000189	0.000307
ENST00000470701	ENSG00000100142	POLR2F	0	0	0.18512	0	0	0
ENST00000536409	ENSG00000006118	TMEM132A	0	0.161113	0.184355	0	0	0
ENST00000519810	ENSG00000128694	OSGEPL1	0	0	0.183672	0	0	0
ENST00000578777	ENSG00000068489	PRR11	0	0.105549	0.18336	0	0	0
ENST00000612161	ENSG00000111371	SLC38A1	0.005488	0.025513	0.182826	0.023248	0.086038	0.012988
ENST00000571958	ENSG00000174231	PRPF8	0	0	0.180278	0	0	0
ENST00000252799	ENSG00000169955	ZNF747	0.003997	0.061646	0.179899	0.000239	0.051807	0.003721
ENST00000252087	ENSG00000240764	PCDHGC5	0.000941	0	0.179442	0	0	0
ENST00000567706	ENSG00000260537	AC012184.2	0	0	0.17866	0	0	0
ENST00000492273	ENSG00000100364	KIAA0930	0.047572	0.049736	0.178223	0.068858	0	0.035184
ENST00000397150	ENSG00000101363	MANBAL	0.036054	0	0.177915	0.052565	0	0
ENST00000562926	ENSG00000072736	NFATC3	9.9e-05	0	0.177598	0	0	0.000416
ENST00000518829	ENSG00000188343	FAM92A	0	0.071445	0.177411	0.051559	0	0
ENST00000374435	ENSG00000198298	ZNF485	0	0.088019	0.177006	0	0.074702	0
ENST00000367944	ENSG00000162746	FCRLB	0.046194	0	0.176978	0.038489	0	0
ENST00000573500	ENSG00000141179	PCTP	0.00911	0	0.175848	0.018859	0	0.015868
ENST00000569925	ENSG00000103194	USP10	0.088753	0.058613	0.175621	0	0	0.050113
ENST00000548777	ENSG00000123352	SPATS2	0.088103	0.013628	0.174648	0.017013	0.047307	0.005125
ENST00000311459	ENSG00000125375	DMAC2L	0	0	0.174196	0	0	0
ENST00000571629	ENSG00000121057	AKAP1	0.006473	0	0.173257	0	0.014523	0
ENST00000530866	ENSG00000168056	LTBP3	0.006984	0.005487	0.170062	0.009664	0.001687	0.006533
ENST00000362026	ENSG00000164038	SLC9B2	0	0.00287	0.169537	0	0	0.064181
ENST00000567511	ENSG00000166595	CIAO2B	0	8e-06	0.168584	1.6e-05	3e-06	0
ENST00000532221	ENSG00000137501	SYTL2	0	0	0.16825	0	0	0
ENST00000550464	ENSG00000185664	PMEL	0	0	0.168049	0	0	0
ENST00000418841	ENSG00000167716	WDR81	0	0	0.167496	0	0	0
ENST00000398168	ENSG00000274276	CBSL	0	0	0.167495	0	0	0
ENST00000558171	ENSG00000196547	MAN2A2	0.004708	0	0.16705	0.010744	0	0.00369
ENST00000652684	ENSG00000243660	ZNF487	0.000117	0.075309	0.166523	0	0.055281	0.022627
ENST00000596273	ENSG00000221983	UBA52	0	0	0.165573	0	0	0
ENST00000531632	ENSG00000176148	TCP11L1	0	0	0.16522	0	0	0
ENST00000357596	ENSG00000136147	PHF11	0.033338	0	0.165083	0	0	0
ENST00000602122	ENSG00000105699	LSR	0	0	0.16501	0	0	0.063766
ENST00000339875	ENSG00000145416	2021-03-01	0.090775	0.020288	0.164511	0.007468	0.037096	0.032132
ENST00000614479	ENSG00000173230	GOLGB1	0.007249	0.005446	0.164477	0.017385	0.010132	0.003001
ENST00000547544	ENSG00000091039	OSBPL8	0	0	0.163952	0.019393	0	0
ENST00000432561	ENSG00000072609	CHFR	0.018959	0	0.163216	0	5.2e-05	0.004709
ENST00000556509	ENSG00000205683	DPF3	0.064632	0	0.162501	0	0.073504	0
ENST00000635388	ENSG00000080503	SMARCA2	0	0	0.162464	0	0	0
ENST00000594500	ENSG00000125734	GPR108	0.049785	0.014301	0.158043	0.001539	0.020864	0.011648
ENST00000570065	ENSG00000102996	MMP15	0.026008	0.023022	0.157416	2.1e-05	0.08016	0.008581
ENST00000435319	ENSG00000143337	TOR1AIP1	0.001989	0.002603	0.157287	0.001827	0.038106	0.026283
ENST00000582832	ENSG00000011260	UTP18	0	0.069533	0.156627	0	0	0
ENST00000437477	ENSG00000164483	SAMD3	0.00342	0	0.156453	0	0.00545	0
ENST00000626419	ENSG00000106348	IMPDH1	0.003003	0.017764	0.156449	0.006915	0.021005	0.011149
ENST00000354903	ENSG00000179094	AC129492.1	0.05359	0.066779	0.155733	0.000598	0.000325	0.000101
ENST00000433205	ENSG00000135596	MICAL1	0	0	0.154987	0	0	0
ENST00000471709	ENSG00000114098	ARMC8	0.027961	0	0.154884	0.01173	0	0
ENST00000297195	ENSG00000164638	SLC29A4	0	0	0.154598	0	0.030418	8e-06
ENST00000377012	ENSG00000204681	GABBR1	0.020227	0.005929	0.154152	0	0	0.012052
ENST00000570212	ENSG00000072736	NFATC3	0	0	0.153464	0	0	0
ENST00000507746	ENSG00000170445	HARS	0	0	0.153375	0	0	0
ENST00000583608	ENSG00000006740	ARHGAP44	0.001965	0.00636	0.152991	0.013056	0.00861	0.004908
ENST00000649631	ENSG00000114861	FOXP1	0	0	0.152472	0	0	0.051244
ENST00000264640	ENSG00000073584	SMARCE1	0	0.069615	0.151457	0	2e-06	0
ENST00000521514	ENSG00000155097	ATP6V1C1	0	0.104595	0.151257	0	0	0
ENST00000563778	ENSG00000102879	CORO1A	0	0	0.151001	0.068471	0	0
ENST00000650904	ENSG00000100578	KIAA0586	0.003552	0	0.149974	0	0	0.014281
ENST00000395831	ENSG00000122678	POLM	0	0	0.149708	0	0	0
ENST00000438486	ENSG00000137965	IFI44	0.051683	0.003126	0.148045	0.014111	3e-06	5.4e-05
ENST00000451427	ENSG00000100129	EIF3L	0	0	0.147903	0	0	0
ENST00000553248	ENSG00000139410	SDSL	0	0.054534	0.147588	0	0	0.043867
ENST00000533187	ENSG00000173039	RELA	0.001363	0.001025	0.146859	0.003926	0.007396	0.004297
ENST00000614862	ENSG00000205683	DPF3	0.006715	0.001528	0.146259	0	0	0.001385
ENST00000517373	ENSG00000164330	EBF1	0	0	0.145689	0	0	0
ENST00000420697	ENSG00000205356	TECPR1	0	0.000866	0.145018	0.000454	0.000693	0.002882
ENST00000466338	ENSG00000148737	TCF7L2	0.034701	0	0.144505	0	0	0
ENST00000487473	ENSG00000074416	MGLL	0.016974	0.002309	0.142784	0	0.019824	0
ENST00000412371	ENSG00000164744	SUN3	0	0	0.142042	0	0	0
ENST00000537856	ENSG00000196628	TCF4	0.012056	0.030044	0.141517	0	0	0.03798
ENST00000356249	ENSG00000103888	CEMIP	0	0.000335	0.141124	0.030979	0	0
ENST00000640762	ENSG00000130005	GAMT	0	0	0.140534	0	0	0
ENST00000563622	ENSG00000140400	MAN2C1	0	0.031275	0.140195	0	0	0
ENST00000432059	ENSG00000120519	SLC10A7	0	0	0.139758	0	0.05334	0
ENST00000380321	ENSG00000171843	MLLT3	0	0	0.139528	0	0	0
ENST00000533087	ENSG00000117682	DHDDS	0	0	0.139327	0	0	0
ENST00000464818	ENSG00000163932	PRKCD	0	0.053896	0.139241	0	0	0
ENST00000617055	ENSG00000175063	UBE2C	0	0.02799	0.138866	0	0.044104	0.034383
ENST00000409815	ENSG00000135899	SP110	0.000194	0.007766	0.138767	0	0.034707	0.004756
ENST00000539409	ENSG00000139146	SINHCAF	0	0	0.138612	0	0	0
ENST00000642285	ENSG00000168724	DNAJC21	0.013278	0.009322	0.138558	0.005405	0.005927	0.004968
ENST00000338306	ENSG00000187860	CCDC157	0	0.102916	0.13792	0	0	0
ENST00000444935	ENSG00000109917	ZPR1	0	0	0.137134	0	0	0
ENST00000444639	ENSG00000235750	KIAA0040	0	0.043506	0.137066	0	0	0.043938
ENST00000274473	ENSG00000145794	MEGF10	0	0.057552	0.13702	0	0	0.114646
ENST00000540449	ENSG00000059728	MXD1	0.015364	0.03415	0.136723	0.048764	0.028108	0.010809
ENST00000436291	ENSG00000231924	PSG1	0	0	0.136521	0.000793	0.053659	0
ENST00000532484	ENSG00000177542	SLC25A22	0	0	0.136472	0	0	0
ENST00000506144	ENSG00000038295	TLL1	0	0	0.135931	0	0	0
ENST00000426246	ENSG00000106346	USP42	0.007637	0	0.135905	0	0.002882	0
ENST00000584502	ENSG00000129226	CD68	0	0	0.135681	0	0	0
ENST00000446223	ENSG00000130810	PPAN	0	0	0.13526	0	0	0
ENST00000535983	ENSG00000162946	DISC1	0	0	0.135123	0	0	0
ENST00000336985	ENSG00000186654	PRR5	0	0.058352	0.135024	0.095913	0	0
ENST00000367621	ENSG00000009844	VTA1	0	0.004774	0.134488	0	0	0.024886
ENST00000618772	ENSG00000162775	RBM15	0.039732	0.057885	0.13446	0.011485	0.005877	0.019524
ENST00000475296	ENSG00000120756	PLS1	0	0	0.134442	0	0	0
ENST00000352904	ENSG00000068078	FGFR3	0	0	0.134191	0	0	0
ENST00000517315	ENSG00000156831	NSMCE2	0.003193	0.000529	0.13404	0.005202	0	0.002928
ENST00000525338	ENSG00000197798	FAM118B	0	0	0.133636	0	0	0.042641
ENST00000412521	ENSG00000127948	POR	0	0	0.133622	0	0.039565	0.020149
ENST00000376950	ENSG00000197779	ZNF81	0.044318	0	0.133582	0	0	0.054586
ENST00000587214	ENSG00000068120	COASY	0	0	0.133312	0	0	0
ENST00000477344	ENSG00000174839	DENND6A	0.04648	0	0.132924	0	0	0
ENST00000396127	ENSG00000122507	BBS9	0	0	0.131865	0	0	0
ENST00000600005	ENSG00000181027	FKRP	0	0	0.131834	0	0	0.042025
ENST00000547305	ENSG00000089022	MAPKAPK5	0	0	0.131676	0	0	0
ENST00000625138	ENSG00000117859	OSBPL9	0	0	0.130766	0	0	0
ENST00000431234	ENSG00000156261	CCT8	0	0	0.130552	0	0	0
ENST00000573778	ENSG00000185624	P4HB	0	0	0.130545	0	0	0.03782
ENST00000393824	ENSG00000257923	CUX1	0	0.06617	0.130139	0	0.018721	0
ENST00000617161	ENSG00000107159	CA9	0	0	0.1288	0.008256	0.027854	0
ENST00000627714	ENSG00000011304	PTBP1	0	0	0.128503	0	0	0
ENST00000379747	ENSG00000133110	POSTN	0.003344	0	0.12827	0.007727	0	0.008691
ENST00000472118	ENSG00000112640	PPP2R5D	0	0	0.128067	0.034037	0	0
ENST00000525784	ENSG00000184014	DENND5A	0	0.058669	0.127241	0	0.032554	0.032698
ENST00000597656	ENSG00000088247	KHSRP	0.020943	0.03337	0.126404	0	0.067098	0
ENST00000646433	ENSG00000171453	POLR1C	0	0	0.126309	0	0	0
ENST00000635729	ENSG00000131089	ARHGEF9	0.043554	0.028658	0.126187	0	0.005758	0
ENST00000461069	ENSG00000108641	B9D1	0.025913	0	0.12576	0	0.022224	0
ENST00000524595	ENSG00000150782	IL18	0	0.049629	0.12548	0	0	0
ENST00000307641	ENSG00000168256	NKIRAS2	0	0	0.124823	0.058255	0	0
ENST00000373925	ENSG00000130775	THEMIS2	0	0	0.124663	0.037021	0	0
ENST00000510704	ENSG00000173011	TADA2B	0.027322	0.033318	0.124341	0	0	0
ENST00000652273	ENSG00000160953	PWWP3A	0	0.00342	0.123571	0	0	0
ENST00000544309	ENSG00000149485	FADS1	0.006686	0	0.122305	0	0	0.015313
ENST00000652097	ENSG00000151612	ZNF827	0	0	0.121386	0	0	0
ENST00000531337	ENSG00000085433	WDR47	0	0	0.120807	0	0	0
ENST00000411832	ENSG00000106635	BCL7B	0	0.066634	0.120762	0	0	0
ENST00000520066	ENSG00000136960	ENPP2	0	0	0.120751	0	0	0
ENST00000394621	ENSG00000157214	STEAP2	0.001398	0	0.120314	0.001947	0	0.007563
ENST00000474576	ENSG00000133606	MKRN1	0	0	0.119606	0	0	0
ENST00000566626	ENSG00000135740	SLC9A5	0	0.056045	0.118978	0.032652	0	0
ENST00000351898	ENSG00000080493	SLC4A4	0	0	0.118891	0	0	0
ENST00000529494	ENSG00000134802	SLC43A3	0	0.021429	0.118566	0	0	0
ENST00000592478	ENSG00000079999	KEAP1	0	0.037904	0.117063	0	0.035374	0
ENST00000457488	ENSG00000035664	DAPK2	0	0	0.116349	0	0	0
ENST00000582165	ENSG00000010244	ZNF207	0	0	0.116012	0	0	0
ENST00000249270	ENSG00000105821	DNAJC2	0	0	0.115325	0	0	0
ENST00000510130	ENSG00000151881	TMEM267	0	0	0.114369	0	0	0
ENST00000368603	ENSG00000143578	CREB3L4	0	0	0.114204	0	0.05867	0
ENST00000571106	ENSG00000187624	C17orf97	0	0.011305	0.113877	0	0	0
ENST00000596380	ENSG00000105698	USF2	0.002065	0.004069	0.113496	0.005787	0.006153	0.005514
ENST00000420743	ENSG00000092199	HNRNPC	0	0	0.113428	0	0	0
ENST00000479917	ENSG00000075790	BCAP29	0	0	0.112939	0	0	0
ENST00000518901	ENSG00000173818	ENDOV	0	0.023284	0.112495	0.048855	0	0
ENST00000394697	ENSG00000121281	ADCY7	0.005206	0.00031	0.111874	0.012046	0.000452	0.027764
ENST00000589350	ENSG00000133275	CSNK1G2	0.011987	0.00927	0.111513	0.028781	0.000448	0.022716
ENST00000620605	ENSG00000178104	PDE4DIP	0	0	0.111481	0	0.00399	0.001942
ENST00000397746	ENSG00000160282	FTCD	0	0	0.111207	0	0.066576	0
ENST00000517291	ENSG00000136997	MYC	0	0	0.111157	0	0	0
ENST00000475412	ENSG00000255154	HTD2	0	0.053543	0.111141	0.054163	0	0
ENST00000434281	ENSG00000157578	LCA5L	0	0	0.110743	0	0	0
ENST00000438028	ENSG00000121716	PILRB	0.000603	0	0.110729	0	0	0.029448
ENST00000381403	ENSG00000164283	ESM1	0	0.078491	0.11011	0	0	0
ENST00000478020	ENSG00000121579	NAA50	0	0.062839	0.110007	0	0	0
ENST00000495241	ENSG00000080845	DLGAP4	0	0	0.109175	0	0	0
ENST00000503785	ENSG00000077684	JADE1	0	0	0.109119	0	0	0
ENST00000557942	ENSG00000068305	MEF2A	0.001178	0.009669	0.108821	0.018538	0.002904	0.002865
ENST00000519576	ENSG00000173334	TRIB1	0.024922	0.012675	0.108641	0.013038	0.013647	0.003838
ENST00000627582	ENSG00000197959	DNM3	0	0	0.108565	0.001177	0	0.000103
ENST00000510819	ENSG00000136504	KAT7	0	0	0.108336	0	0	0
ENST00000371064	ENSG00000188706	ZDHHC9	0.022279	0.026568	0.108301	0.020457	0.044171	0
ENST00000479692	ENSG00000147889	CDKN2A	0.009069	0	0.1082	0	0.001111	0.003858
ENST00000483798	ENSG00000108176	DNAJC12	0	0.019826	0.107888	0.01542	0	0
ENST00000418497	ENSG00000007341	ST7L	0	0	0.107374	0	0	0
ENST00000504568	ENSG00000127415	IDUA	0	0.055021	0.105889	0	0	0.042417
ENST00000430407	ENSG00000180198	RCC1	0	0	0.105795	0	0	0
ENST00000548193	ENSG00000110911	SLC11A2	0	0.007061	0.105577	0.003651	0	0.015512
ENST00000373738	ENSG00000010030	ETV7	0.032642	0	0.105433	0	0	0
ENST00000515499	ENSG00000146063	TRIM41	0.040755	0	0.104875	0	0	0.020114
ENST00000374075	ENSG00000106948	AKNA	0.028649	0	0.104776	0	0	0.003117
ENST00000584601	ENSG00000141736	ERBB2	0.021749	0.023418	0.104547	0.021335	0.000679	0.0078
ENST00000530912	ENSG00000165916	PSMC3	0	0	0.1044	0	0	0
ENST00000652515	ENSG00000136010	ALDH1L2	0.00866	0	0.103782	0.006189	0.013894	0.00538
ENST00000592367	ENSG00000130023	ERMARD	0.031387	0.010288	0.103214	0.033781	0	0
ENST00000420786	ENSG00000168385	2021-09-02	0	0.082805	0.10282	0	0	0
ENST00000616596	ENSG00000278023	RDM1	0	0	0.102153	0.006546	0	0
ENST00000429812	ENSG00000120913	PDLIM2	0.003754	0	0.101617	0	0.016842	0.012024
ENST00000429288	ENSG00000155380	SLC16A1	0.01858	0.020754	0.101496	0.010107	0.026245	0.029044
ENST00000523808	ENSG00000164941	INTS8	0	0	0.101443	0.033856	0	0.016199
ENST00000348120	ENSG00000182901	RGS7	0	0	0.100886	0	0	0
ENST00000355149	ENSG00000102181	CD99L2	0	0	0.100747	0	0	0
ENST00000429117	ENSG00000076242	MLH1	0	0	0.099862	0.03668	0	0
ENST00000578576	ENSG00000153976	HS3ST3A1	0.003362	0.000592	0.099726	0.004035	0.001482	0.016264
ENST00000593067	ENSG00000186832	KRT16	0	0.035271	0.099636	0	0	0.005005
ENST00000543814	ENSG00000175575	PAAF1	0	0	0.099608	0	0	0
ENST00000393578	ENSG00000149948	HMGA2	0.03347	0	0.099396	0	0.024859	0
ENST00000613197	ENSG00000278318	ZNF229	0	0	0.098684	0	0	0
ENST00000558395	ENSG00000104177	MYEF2	0	0	0.098664	0	0	7e-06
ENST00000647407	ENSG00000284770	TBCE	0	0.084719	0.098382	0	0	0
ENST00000612959	ENSG00000126653	NSRP1	0	0	0.098226	0	0	0.032216
ENST00000502270	ENSG00000170917	NUDT6	0.005402	0.068968	0.097622	0.002622	0	0
ENST00000568292	ENSG00000062038	CDH3	0.025892	0.000558	0.097293	0.006404	0.014238	0.014244
ENST00000594551	ENSG00000032444	PNPLA6	0	0.067981	0.096858	0	0	0
ENST00000420009	ENSG00000118503	TNFAIP3	0	0	0.09644	0	0	0
ENST00000419890	ENSG00000175106	TVP23C	0	0.042309	0.095937	0.061891	0.004048	0
ENST00000371518	ENSG00000020256	ZFP64	0	0	0.095332	0	0.013154	0
ENST00000466180	ENSG00000159214	CCDC24	0	0.059477	0.095326	0	0	0.017229
ENST00000441519	ENSG00000198520	ARMH1	0	0	0.095223	0	0	0
ENST00000583621	ENSG00000176658	MYO1D	0.016217	0.013588	0.094656	0.015602	0.017172	0.02814
ENST00000638874	ENSG00000142408	CACNG8	0.001211	0.030001	0.09448	0.040935	0	0
ENST00000548313	ENSG00000166153	DEPDC4	0.033196	0	0.094244	0.003334	0.013296	0.008183
ENST00000465919	ENSG00000075790	BCAP29	0.001204	0	0.094133	0	0.002438	0.001432
ENST00000564328	ENSG00000173517	PEAK1	0.026546	0	0.09404	0	0	0
ENST00000378168	ENSG00000147044	CASK	0.005742	0.001119	0.093757	0.002892	0.002909	0.025895
ENST00000514395	ENSG00000214367	HAUS3	0	0	0.093614	0.035107	0	0
ENST00000455666	ENSG00000187688	TRPV2	0.005568	0.00588	0.093338	0.008279	0.006659	0.01285
ENST00000589337	ENSG00000105576	TNPO2	0	0	0.093147	0	0	0
ENST00000354968	ENSG00000198336	MYL4	0	0	0.093075	0	0	0.048306
ENST00000596730	ENSG00000183668	PSG9	0	0	0.092639	0	0	0
ENST00000409738	ENSG00000239306	RBM14	0	0	0.092464	0	0	0
ENST00000638178	ENSG00000115525	ST3GAL5	0	0	0.091923	0	0	0
ENST00000356757	ENSG00000172738	TMEM217	0	0	0.09185	0	0	0
ENST00000527766	ENSG00000150433	TMEM218	0	0	0.091828	0	0	0
ENST00000250383	ENSG00000100867	DHRS2	0	0	0.091775	0	0.005625	0.007869
ENST00000525611	ENSG00000149257	SERPINH1	0	0	0.091746	0	0	0
ENST00000448072	ENSG00000100429	HDAC10	0	0	0.091695	0	0	0
ENST00000383045	ENSG00000184702	2021-09-05	0	0	0.091381	0	0	0
ENST00000405141	ENSG00000084676	NCOA1	0.002958	0.018575	0.091108	0.00798	0.008035	0
ENST00000513992	ENSG00000145358	DDIT4L	0	0	0.090579	0	0	0
ENST00000506732	ENSG00000169744	LDB2	0	0	0.09045	0	0.043623	0
ENST00000373560	ENSG00000147099	HDAC8	0	0.04252	0.090368	0	0	0
ENST00000414158	ENSG00000124143	ARHGAP40	0	0	0.090256	0	0.013845	0.036575
ENST00000340126	ENSG00000067066	SP100	0	0	0.090223	0.044176	0	0
ENST00000482070	ENSG00000058063	ATP11B	0	0	0.090095	0.050647	0	0
ENST00000575032	ENSG00000121057	AKAP1	0	0	0.089789	0	0	0
ENST00000409116	ENSG00000124380	SNRNP27	0	0	0.089636	0	0	0
ENST00000639878	ENSG00000109911	ELP4	0	0.021326	0.08953	0.008293	0	0
ENST00000409609	ENSG00000144366	GULP1	0	0.017511	0.08918	0	0	0.036903
ENST00000562477	ENSG00000261587	TMEM249	0	0	0.089078	0	0	0
ENST00000512104	ENSG00000103599	IQCH	0	0.020664	0.088042	0.023288	0.016952	0
ENST00000616026	ENSG00000132613	MTSS1L	0.009948	0.006791	0.088001	0.003232	0.000137	0.030353
ENST00000539128	ENSG00000162144	CYB561A3	2.4e-05	3.8e-05	0.087291	3.1e-05	0.000203	6.2e-05
ENST00000566150	ENSG00000135720	DYNC1LI2	0	0	0.087257	0	0	0
ENST00000527749	ENSG00000173039	RELA	5e-06	3e-06	0.087204	1e-05	1.3e-05	8e-06
ENST00000645032	ENSG00000156313	RPGR	0.01831	0.008259	0.086965	0.001967	0.014858	0.010866
ENST00000560256	ENSG00000170776	AKAP13	0.037869	0.005943	0.086626	0.02031	0	0.000884
ENST00000559533	ENSG00000092098	RNF31	0	0.050565	0.086403	0	0	0
ENST00000644893	ENSG00000177189	RPS6KA3	0	0	0.0861	0	0	0
ENST00000586252	ENSG00000168101	NUDT16L1	0	0	0.085899	0	0	0
ENST00000423158	ENSG00000185652	NTF3	0	0.022006	0.085763	0	0	0
ENST00000632629	ENSG00000274810	NPHP3-ACAD11	0	0	0.085682	0.036061	0	0
ENST00000358358	ENSG00000121310	ECHDC2	0	0	0.08532	0	0.0202	0.001
ENST00000393934	ENSG00000240891	PLCXD2	0.008879	0	0.08527	0	0	0
ENST00000543090	ENSG00000256269	HMBS	0	0	0.085008	0.021504	0	0.02339
ENST00000535889	ENSG00000116984	MTR	0	0	0.08496	0	0	0
ENST00000432680	ENSG00000013619	MAMLD1	0.026784	0	0.084606	0	0	0
ENST00000548734	ENSG00000059758	CDK17	0	0	0.084582	0.023117	0	0.008096
ENST00000440484	ENSG00000132906	CASP9	0	0.041515	0.084361	0	0	0
ENST00000534855	ENSG00000115137	DNAJC27	0	0	0.084353	0	0	0
ENST00000566327	ENSG00000092531	SNAP23	0	0.073266	0.084257	0	0	0
ENST00000434791	ENSG00000122085	MTERF4	0.022746	0.021102	0.083782	0.027861	0.013923	0.016563
ENST00000415524	ENSG00000147874	HAUS6	0.010645	0.007226	0.08368	0.01257	0.008813	0.015407
ENST00000518904	ENSG00000215262	KCNU1	0	0	0.082432	0	0	0.028531
ENST00000577277	ENSG00000187688	TRPV2	0	0	0.082179	0	0	0
ENST00000584027	ENSG00000269713	NBPF9	0	0	0.08207	0	0	0
ENST00000508549	ENSG00000164070	HSPA4L	0	0	0.082	0	0	0
ENST00000514748	ENSG00000181381	DDX60L	0	0	0.081951	0	0.03208	0
ENST00000512834	ENSG00000164306	PRIMPOL	0.000496	0.016187	0.08184	0.000401	0.000106	0.00282
ENST00000372725	ENSG00000156650	KAT6B	0	0	0.081582	0	0	0
ENST00000524763	ENSG00000177106	EPS8L2	0	0	0.081338	0	0	0
ENST00000651916	ENSG00000169255	B3GALNT1	0	0	0.081333	0	0	0
ENST00000419493	ENSG00000064601	CTSA	0	0.064092	0.081104	0	0	0
ENST00000345125	ENSG00000164733	CTSB	0.012352	0.011506	0.081049	0.002471	0	0.012657
ENST00000440972	ENSG00000198369	SPRED2	0.028332	0.028571	0.080542	0.034132	0	0
ENST00000421626	ENSG00000146733	PSPH	0	0	0.079884	0	0	0
ENST00000540732	ENSG00000255730	AC011462.2	0	0	0.07972	0	0	0
ENST00000641558	ENSG00000164073	MFSD8	0	0	0.079494	0	0	0
ENST00000640889	ENSG00000102359	SRPX2	0.000324	4e-06	0.079484	0.000105	0.00122	0
ENST00000544927	ENSG00000111247	RAD51AP1	0	0	0.079459	0	0	0
ENST00000439141	ENSG00000160746	ANO10	0.005035	0.001647	0.079003	0	0.003373	0
ENST00000394303	ENSG00000067191	CACNB1	0.020659	0	0.078933	0.000842	0.000174	0.00643
ENST00000648784	ENSG00000182307	C8orf33	0.00583	0.018931	0.07883	0.001926	0	0.005601
ENST00000453208	ENSG00000100083	GGA1	0	0	0.078817	0	0	0
ENST00000560599	ENSG00000147421	HMBOX1	0	0	0.07875	0	0	0
ENST00000596400	ENSG00000269533	AC003002.3	0	0	0.078593	0	0	0
ENST00000472333	ENSG00000112062	MAPK14	0.01201	0.005493	0.078226	0.015814	0.008005	0.014235
ENST00000570115	ENSG00000169375	SIN3A	0.037845	0.024095	0.078175	0	0.014195	0
ENST00000628915	ENSG00000048991	R3HDM1	0	0	0.077513	0	0	0
ENST00000554914	ENSG00000258724	PINX1	0	0	0.077077	0	0	0
ENST00000564092	ENSG00000260916	CCPG1	0.023296	0	0.076916	0	0.004357	0
ENST00000532539	ENSG00000005801	ZNF195	0	0	0.07671	0	0	0
ENST00000617926	ENSG00000070371	CLTCL1	0	0	0.076601	0	0	0
ENST00000545738	ENSG00000072163	LIMS2	0	0	0.076566	0	0	0
ENST00000396234	ENSG00000145703	IQGAP2	0.002282	0.013474	0.076447	0	0	0.017537
ENST00000339420	ENSG00000163812	ZDHHC3	0	0	0.076222	0	0	0
ENST00000546342	ENSG00000104687	GSR	0	0	0.076044	0	0	0
ENST00000542350	ENSG00000187726	DNAJB13	0	0	0.075991	0	0.029517	0.000907
ENST00000372384	ENSG00000157514	TSC22D3	0	0	0.075773	0	0	4.3e-05
ENST00000476625	ENSG00000094631	HDAC6	0	0	0.075663	0	0	0
ENST00000593097	ENSG00000068097	HEATR6	0	0	0.075475	0	0	0
ENST00000406058	ENSG00000269858	EGLN2	0	0	0.074668	0	0	0
ENST00000639906	ENSG00000143450	OAZ3	0	0	0.074246	0	0	0.037333
ENST00000611557	ENSG00000268606	MAGEA2	9e-05	0.002561	0.074224	0	0	0
ENST00000534726	ENSG00000120451	SNX19	0.002251	0.001749	0.07421	0	0	0
ENST00000546024	ENSG00000132185	FCRLA	0	0	0.074089	0	0	0
ENST00000590510	ENSG00000167642	SPINT2	0.02035	0	0.073941	0	0	0
ENST00000424508	ENSG00000100364	KIAA0930	0.006922	0	0.073571	0	0	0
ENST00000380450	ENSG00000129214	SHBG	0.000591	0	0.073386	0.003059	0	0.000148
ENST00000491024	ENSG00000187583	PLEKHN1	0	0.061952	0.073051	0	0	0
ENST00000479114	ENSG00000165209	STRBP	0.011049	0.010855	0.072965	0.016702	0	0.00661
ENST00000539256	ENSG00000052126	PLEKHA5	0	0	0.072721	0	0	0
ENST00000398927	ENSG00000157551	KCNJ15	0	0	0.072571	0	0	0
ENST00000521429	ENSG00000133740	E2F5	0.014577	0.012233	0.072267	0.001604	0.013419	0.002749
ENST00000496231	ENSG00000171163	ZNF692	0	0.030187	0.072221	0.01839	0.006217	0
ENST00000612492	ENSG00000109099	PMP22	0	0.017483	0.072065	0.036599	0.006812	0
ENST00000373206	ENSG00000092847	AGO1	0	0	0.071978	0	0	0
ENST00000524053	ENSG00000158560	DYNC1I1	0.021353	0.011233	0.071654	0.021611	0.020205	0
ENST00000309060	ENSG00000174306	ZHX3	0.002589	0.044136	0.071535	0	0	0
ENST00000504064	ENSG00000170006	TMEM154	0.033175	0.009477	0.07148	0.006029	0.022726	0.0045
ENST00000474039	ENSG00000111837	MAK	0	0	0.071282	0	0	0
ENST00000650101	ENSG00000256269	HMBS	1e-06	0	0.071244	0	0	0
ENST00000359793	ENSG00000183137	CEP57L1	0	0	0.07078	0.03995	0	0
ENST00000616081	ENSG00000115211	EIF2B4	0.031843	0.023825	0.070722	0	0.003077	0
ENST00000541481	ENSG00000133110	POSTN	0	0	0.070582	0	0	0
ENST00000525879	ENSG00000178685	PARP10	0	0.025302	0.070515	0	0.038132	0.001262
ENST00000311364	ENSG00000175449	RFESD	0	0.023853	0.070361	0.014054	0	0
ENST00000318357	ENSG00000163126	ANKRD23	0	0.00015	0.069962	0.006946	0	0.030404
ENST00000448849	ENSG00000134897	BIVM	0	0.016081	0.069953	0	0.022454	0
ENST00000620789	ENSG00000189067	LITAF	0.024373	0.026114	0.069701	0	0	0
ENST00000370586	ENSG00000166024	R3HCC1L	0	0	0.069508	0	0	0
ENST00000451686	ENSG00000205726	ITSN1	0	0	0.069411	0	0	0
ENST00000413622	ENSG00000143570	SLC39A1	0	0	0.069315	0	0	0
ENST00000594709	ENSG00000105696	TMEM59L	0	0	0.069295	0	0	0
ENST00000265956	ENSG00000165219	GAPVD1	0.002119	0.004042	0.0692	4.2e-05	0.004542	3.2e-05
ENST00000303659	ENSG00000138101	DTNB	0	0	0.069119	0	0	0
ENST00000652358	ENSG00000102125	TAZ	0	0	0.069094	0	0	0.024559
ENST00000422358	ENSG00000127314	RAP1B	0	0	0.068586	0	0.028723	0
ENST00000621326	ENSG00000163331	DAPL1	0.017458	0	0.068343	0	0	0
ENST00000407082	ENSG00000099956	SMARCB1	0	0	0.068301	0	0	0
ENST00000445422	ENSG00000099991	CABIN1	0.000618	0.041378	0.068187	0.003163	0.001675	0.000869
ENST00000455023	ENSG00000154978	VOPP1	0	0	0.067895	0.00164	0.015429	0.001085
ENST00000280190	ENSG00000150627	WDR17	0.001214	0.026315	0.067849	0	0	0.001317
ENST00000445195	ENSG00000100116	GCAT	0.002456	0.013428	0.067835	0.017172	0.013567	0.004775
ENST00000542154	ENSG00000089693	MLF2	0	0	0.067673	0	0	0
ENST00000508074	ENSG00000152495	CAMK4	0.008973	0	0.067663	0	0	0
ENST00000613466	ENSG00000164162	ANAPC10	1e-05	0.055826	0.06753	0.000533	0	0
ENST00000362025	ENSG00000127328	RAB3IP	0	0	0.066985	0	0	0.031
ENST00000524343	ENSG00000143303	RRNAD1	0	0	0.06651	0.038873	0	0
ENST00000551883	ENSG00000120833	SOCS2	0	0	0.06647	0	0	0
ENST00000530419	ENSG00000176148	TCP11L1	0	0.006357	0.066408	0	0.0199	0
ENST00000592334	ENSG00000041353	RAB27B	0	0.015959	0.066239	0.024757	0	0
ENST00000524419	ENSG00000179241	LDLRAD3	0	0.019983	0.066014	0.00613	0.006637	0
ENST00000456399	ENSG00000213889	PPM1N	0	0.011805	0.065952	0	0.001334	0.046724
ENST00000472507	ENSG00000124508	BTN2A2	0	0	0.065508	0	0	0.005958
ENST00000409606	ENSG00000048991	R3HDM1	0	0	0.065475	0	0	0
ENST00000482668	ENSG00000169764	UGP2	0	0	0.065474	0	0	0
ENST00000409217	ENSG00000158552	ZFAND2B	0.015174	0.004733	0.064951	0.00449	0.01284	0.009421
ENST00000412450	ENSG00000181555	SETD2	0.005765	0.00297	0.064712	0.007477	0.003548	0.010601
ENST00000443757	ENSG00000144567	RETREG2	0.028485	0.017532	0.064633	0.009415	0	0
ENST00000344233	ENSG00000178752	ERFE	0	0	0.064587	0	0	0
ENST00000511665	ENSG00000183624	HMCES	0	0	0.06458	0	0	0
ENST00000420796	ENSG00000105879	CBLL1	0.028557	0.011033	0.064558	0.017384	0.010227	0.012828
ENST00000537610	ENSG00000111752	PHC1	0	0	0.06453	0	0	0
ENST00000352482	ENSG00000101150	TPD52L2	0.001635	0	0.064494	0.014187	0.005285	0
ENST00000557574	ENSG00000259066	AL110118.2	0	0	0.063938	0	0	0
ENST00000509154	ENSG00000064692	SNCAIP	0.007142	0	0.063083	0	0	0.005535
ENST00000510015	ENSG00000138777	PPA2	0	0	0.063066	0	0	0
ENST00000432533	ENSG00000124508	BTN2A2	0.004706	0.008518	0.063018	0	0	0
ENST00000424468	ENSG00000170852	KBTBD2	0.017985	0	0.062457	0.012645	0	0.012117
ENST00000392111	ENSG00000074582	BCS1L	0	0	0.062448	0	0	0
ENST00000398612	ENSG00000172748	ZNF596	0	0	0.062427	0	0	0
ENST00000576036	ENSG00000189067	LITAF	0	0.005674	0.062291	0.009943	0	0
ENST00000413298	ENSG00000068745	IP6K2	0	0	0.062191	0	0	0
ENST00000563139	ENSG00000184110	EIF3C	0.00516	0.002446	0.062158	0	0.017328	0
ENST00000527949	ENSG00000025434	NR1H3	0	0	0.061931	0	0	0
ENST00000544400	ENSG00000213782	DDX47	0	0	0.06193	0	0	0
ENST00000308008	ENSG00000158987	RAPGEF6	0	0	0.061812	0	0	0
ENST00000372727	ENSG00000204070	SYS1	0	0	0.061788	0	0	0.032068
ENST00000638572	ENSG00000115525	ST3GAL5	0.003098	0.001064	0.061652	0.010089	0.002371	0.008796
ENST00000395650	ENSG00000205560	CPT1B	0	0.009059	0.061023	0	0	0
ENST00000429845	ENSG00000163491	NEK10	0.002166	0	0.060924	0	0	0.000216
ENST00000544613	ENSG00000196118	CCDC189	0	0	0.060833	0	0	0
ENST00000394906	ENSG00000132589	FLOT2	0.005791	0.017725	0.060352	0.005942	0.0236	0.001764
ENST00000581959	ENSG00000177885	GRB2	0	0.038165	0.060238	0	0	0
ENST00000651915	ENSG00000170581	STAT2	0	0	0.06011	0	0	0
ENST00000403685	ENSG00000006468	ETV1	0	0.006819	0.060024	0.007204	0.003939	0.001349
ENST00000613938	ENSG00000166024	R3HCC1L	0	0.000296	0.059958	0.000112	0	0
ENST00000472166	ENSG00000163608	NEPRO	0.006471	0	0.059919	0	0	0.005426
ENST00000375995	ENSG00000142621	FHAD1	0	0	0.059541	0	0	0
ENST00000564751	ENSG00000103855	CD276	0	0.016922	0.05928	0	0.039087	0.003328
ENST00000486349	ENSG00000151150	ANK3	0	0.04232	0.059052	0	0	0
ENST00000455942	ENSG00000254827	SLC22A18AS	0	0.012914	0.058969	0	0	0
ENST00000560616	ENSG00000196547	MAN2A2	0	0.022484	0.058551	0	0	0
ENST00000555711	ENSG00000205707	ETFRF1	0	0	0.05852	0	0.032726	0.000931
ENST00000584061	ENSG00000108439	PNPO	0	0	0.058382	0	0	0
ENST00000608781	ENSG00000163006	CCDC138	0	0	0.058336	0.013385	0.015711	0
ENST00000532291	ENSG00000111087	GLI1	0.0017	2.6e-05	0.058237	0	0	0.004488
ENST00000468980	ENSG00000125618	PAX8	0.02658	0	0.058081	0.022474	0	0
ENST00000551118	ENSG00000138346	DNA2	0	0	0.057549	0	0	0
ENST00000426613	ENSG00000013619	MAMLD1	0	0	0.057524	0	0	0.014945
ENST00000577729	ENSG00000108387	2021-09-04	0	0.004914	0.057407	0	0.017621	0.002283
ENST00000588809	ENSG00000104957	CCDC130	0	0	0.057401	0	0	0
ENST00000502858	ENSG00000269556	TMEM185A	0	0	0.057374	0	0	0
ENST00000472047	ENSG00000169764	UGP2	0.003059	0.005818	0.057238	0.020284	0	0
ENST00000471261	ENSG00000049769	PPP1R3F	0	0	0.057222	0	0	0
ENST00000542031	ENSG00000050820	BCAR1	5e-06	0	0.057156	5e-06	1.6e-05	9e-06
ENST00000526057	ENSG00000166444	ST5	0	0	0.057143	0	0	0
ENST00000395451	ENSG00000064652	SNX24	0.014717	0.010188	0.05709	0.004262	0	0.018395
ENST00000366496	ENSG00000162711	NLRP3	0	0	0.057034	0	0	0
ENST00000649914	ENSG00000006530	AGK	0	0	0.056871	0	0	0
ENST00000533981	ENSG00000124357	NAGK	0	0	0.056787	0	0	0
ENST00000498317	ENSG00000243649	CFB	0.024172	0.003938	0.056166	2.9e-05	0.029637	3.9e-05
ENST00000393088	ENSG00000197249	SERPINA1	0.002625	0.000222	0.055659	0.005816	0.003356	0
ENST00000579219	ENSG00000221926	TRIM16	0.019916	0	0.055539	0.024036	0	0
ENST00000428524	ENSG00000168385	2021-09-02	0	0	0.055095	0	0	0
ENST00000360905	ENSG00000082805	ERC1	0	0	0.055087	0	0	1.5e-05
ENST00000424272	ENSG00000115594	IL1R1	0	0.017516	0.054955	0.029217	0	0
ENST00000313350	ENSG00000163539	CLASP2	0	0	0.054601	0	0	0
ENST00000389856	ENSG00000015133	CCDC88C	0.000368	0.015194	0.054555	0.031874	0	0.00052
ENST00000607232	ENSG00000095637	SORBS1	0.004234	0	0.054544	0.008126	0	0
ENST00000403268	ENSG00000167065	DUSP18	0	0	0.054534	0.023564	1.9e-05	0.000136
ENST00000639602	ENSG00000284299	AL590132.1	0	0	0.054286	0.007171	0	0
ENST00000519643	ENSG00000174705	SH3PXD2B	0	0.035971	0.054158	0	0	0
ENST00000414791	ENSG00000177409	SAMD9L	0	0	0.05401	0	0	0
ENST00000547579	ENSG00000110911	SLC11A2	0	0	0.053858	0	0	0
ENST00000524974	ENSG00000178104	PDE4DIP	0	0	0.053708	0	0.015911	0.002006
ENST00000600853	ENSG00000176024	ZNF613	0	0	0.053624	4.6e-05	0	0.011157
ENST00000374816	ENSG00000099250	NRP1	0.003519	0.017735	0.053476	0.021042	0.01099	0.006989
ENST00000528776	ENSG00000188997	KCTD21	0	0	0.053086	0	0	0
ENST00000440166	ENSG00000136279	DBNL	0	0	0.053005	0	0	0
ENST00000616183	ENSG00000160352	ZNF714	0	0	0.052949	0	0	0
ENST00000563876	ENSG00000180917	CMTR2	0	0	0.0528	0.030861	0	0
ENST00000519078	ENSG00000170312	CDK1	0	0	0.052759	0	0	0
ENST00000339560	ENSG00000132000	PODNL1	0	0.031995	0.052572	0	0	0
ENST00000543086	ENSG00000082805	ERC1	2.3e-05	2.1e-05	0.052536	2e-06	5.2e-05	1.1e-05
ENST00000647543	ENSG00000284931	AC104389.5	0	0	0.052505	0	0	0
ENST00000391834	ENSG00000204673	AKT1S1	0.007285	0.000417	0.052385	9.4e-05	0.007834	0.000212
ENST00000520867	ENSG00000113742	CPEB4	0.007846	0.027085	0.052344	0.006986	0.009612	0.005341
ENST00000646790	ENSG00000138771	SHROOM3	0	0	0.052237	0	0	0
ENST00000412508	ENSG00000132330	SCLY	0	0	0.051971	0	0	0
ENST00000560279	ENSG00000103852	TTC23	0	0.018985	0.051843	0	0	0
ENST00000370886	ENSG00000171311	EXOSC1	0	0	0.051729	0	0.02136	0
ENST00000397092	ENSG00000164850	GPER1	0.009492	0.01285	0.051675	0.015505	0.003294	0.0036
ENST00000315962	ENSG00000147573	TRIM55	0	0	0.051473	0.01335	0.000799	0.014008
ENST00000565637	ENSG00000157429	ZNF19	0	0	0.051302	0	0	0
ENST00000527703	ENSG00000183889	AC138969.1	0	0	0.051231	0	0	0
ENST00000434143	ENSG00000161267	BDH1	0.000346	0	0.0512	0.000145	0	0
ENST00000471243	ENSG00000116729	WLS	0	0	0.051102	0	0	0
ENST00000540440	ENSG00000118557	PMFBP1	0	0	0.050894	0	0	0
ENST00000439380	ENSG00000138356	AOX1	0	0	0.050772	0	0	0
ENST00000556141	ENSG00000213903	LTB4R	0	0	0.050603	0	0	0
ENST00000532158	ENSG00000181135	ZNF707	0	0	0.050509	0	0	0
ENST00000568637	ENSG00000047346	FAM214A	0	0	0.050406	0	0	0
ENST00000515641	ENSG00000151458	ANKRD50	0	0	0.050275	0	0	0
ENST00000347004	ENSG00000184916	JAG2	0	0.00076	0.050088	0.001358	0	0.001771
ENST00000565340	ENSG00000005189	REXO5	0	0	0.049966	0	0	0
ENST00000374088	ENSG00000106948	AKNA	0	0	0.049966	0	0.01126	0.000433
ENST00000324750	ENSG00000176136	MC5R	0.005974	0.000857	0.04982	0.018024	0.007717	0
ENST00000392112	ENSG00000130396	AFDN	0	0	0.049786	0	0	0
ENST00000420482	ENSG00000088179	PTPN4	0	0.005286	0.049674	0	0.016465	0
ENST00000494014	ENSG00000044524	EPHA3	0	0	0.049663	0	0	0
ENST00000357392	ENSG00000121797	CCRL2	0	0.011064	0.049611	0.011558	0	0
ENST00000537428	ENSG00000117481	NSUN4	0	0	0.049588	0	0	0
ENST00000457433	ENSG00000142910	TINAGL1	0	0.020063	0.049431	0.036553	0	0
ENST00000454930	ENSG00000136504	KAT7	0	0	0.04939	0	0	0
ENST00000432328	ENSG00000179715	PCED1B	0	0	0.04937	0	0	0
ENST00000314289	ENSG00000063978	RNF4	0	0	0.049153	0	0.019746	0
ENST00000543654	ENSG00000185864	NPIPB4	0	0	0.049119	0	0	0
ENST00000202028	ENSG00000088367	EPB41L1	0	0	0.048591	0.008012	0	0.005929
ENST00000548710	ENSG00000123352	SPATS2	0	0	0.04857	0	0	0
ENST00000258991	ENSG00000136478	TEX2	0.014466	0.003386	0.048294	0	0.006399	0.007542
ENST00000576988	ENSG00000167842	MIS12	0.005001	0	0.048215	0	0	0
ENST00000593574	ENSG00000104936	DMPK	0	0	0.048211	0	0	0
ENST00000453080	ENSG00000168781	PPIP5K1	0.009855	0.028496	0.048056	0	0	0
ENST00000313838	ENSG00000171962	DRC3	0.015408	0.005469	0.04804	0.017701	0.000457	0
ENST00000369288	ENSG00000117281	CD160	0	0	0.048006	0	0	0
ENST00000587869	ENSG00000115266	APC2	0	0	0.047841	0.0115	0	0
ENST00000548163	ENSG00000198324	PHETA1	0.002421	0.000163	0.047829	0.003723	0	0
ENST00000305108	ENSG00000171840	NINJ2	0.018838	0.011141	0.047753	0.001615	0.019268	0.004877
ENST00000479875	ENSG00000102125	TAZ	0	0	0.047634	0	0	0
ENST00000560275	ENSG00000213928	IRF9	0	0.016463	0.047596	0.01513	0	0.013722
ENST00000513960	ENSG00000038427	VCAN	0.010149	0.001639	0.047443	0.001536	0.00137	0.001045
ENST00000223336	ENSG00000106603	COA1	0.009462	0.000764	0.046861	0.003393	0.000296	0.000681
ENST00000588496	ENSG00000125746	EML2	0	0	0.046788	0	0.027965	0
ENST00000424398	ENSG00000242612	DECR2	0	0	0.046678	0.012243	0	0
ENST00000620405	ENSG00000272398	CD24	0	0	0.046607	0	0	0
ENST00000581829	ENSG00000215421	ZNF407	0	0	0.04657	0.001846	0	0.003182
ENST00000591134	ENSG00000181666	HKR1	0	0	0.046518	0	0	0.000404
ENST00000569035	ENSG00000140398	NEIL1	0.009948	0	0.046225	0	0.010186	0
ENST00000475837	ENSG00000146966	DENND2A	0	0	0.04594	0	0	0
ENST00000545725	ENSG00000179044	EXOC3L1	0.008279	0.01417	0.045751	0.003347	0.019332	0
ENST00000540796	ENSG00000183150	GPR19	0	0.003362	0.045614	0	0	0
ENST00000262858	ENSG00000013619	MAMLD1	0.00661	0.004917	0.045605	7e-05	0.001879	0.002286
ENST00000539449	ENSG00000130347	RTN4IP1	0	0	0.04556	0	0	0
ENST00000380600	ENSG00000176896	TCEANC	0	0.024154	0.045461	0	0	0
ENST00000513861	ENSG00000163138	PACRGL	0	0	0.045443	0	2e-06	0
ENST00000452438	ENSG00000106290	TAF6	0.007732	0	0.045328	0	0	0.013615
ENST00000585607	ENSG00000132000	PODNL1	0	0	0.045305	0	0	0
ENST00000503658	ENSG00000048342	CC2D2A	0	0	0.045257	0	0	0
ENST00000534360	ENSG00000137691	CFAP300	0.00168	0.000347	0.045241	0	0.001071	0.003193
ENST00000507382	ENSG00000167105	TMEM92	0	0	0.045206	0	0	0
ENST00000555716	ENSG00000150527	MIA2	0	0.003642	0.045123	0	9.3e-05	0
ENST00000452902	ENSG00000123843	C4BPB	0.007932	0.01394	0.045105	0.008257	0.002757	0.016179
ENST00000643750	ENSG00000165475	CRYL1	0.014284	0.000858	0.044789	0	0.005012	0.00336
ENST00000648444	ENSG00000136848	DAB2IP	0.004005	0	0.044784	0	0	0
ENST00000592023	ENSG00000012061	ERCC1	0.005948	0.006327	0.044551	0	0	0
ENST00000531145	ENSG00000205177	C11orf91	0	0	0.044525	0	0	0.0091
ENST00000614910	ENSG00000095303	PTGS1	0	0.025339	0.044519	0.005251	0	0
ENST00000415045	ENSG00000169760	NLGN1	0	0	0.044508	0	0	0
ENST00000537981	ENSG00000133318	RTN3	9.3e-05	0.000229	0.044316	0	0	0
ENST00000582961	ENSG00000108666	C17orf75	0	0	0.044236	0	0.028686	0
ENST00000613207	ENSG00000151150	ANK3	0	0	0.044213	0	0	0
ENST00000433287	ENSG00000181004	BBS12	0	0	0.044161	0	0	0
ENST00000563279	ENSG00000103111	MON1B	0	0	0.044154	0	0	0
ENST00000617879	ENSG00000185324	CDK10	0.003415	0.023436	0.044043	0	0	0
ENST00000452130	ENSG00000099282	TSPAN15	0	0	0.043915	0	0	0
ENST00000555425	ENSG00000100934	SEC23A	0	0.027962	0.043845	0.009798	0	0
ENST00000599251	ENSG00000173480	ZNF417	0	0	0.043843	0	0	0
ENST00000597447	ENSG00000083844	ZNF264	0	0	0.043797	0	0	0
ENST00000566724	ENSG00000167964	RAB26	0	0	0.043731	0	0	0
ENST00000560674	ENSG00000182253	SYNM	0.001073	0.000147	0.043725	5.5e-05	8.3e-05	0.000215
ENST00000525734	ENSG00000110274	CEP164	0	0	0.043604	0	0	0
ENST00000542590	ENSG00000175463	TBC1D10C	0	0.003626	0.043473	5e-06	0.002598	0
ENST00000423413	ENSG00000079308	TNS1	0	0	0.043382	0	0	0
ENST00000480716	ENSG00000175787	ZNF169	0	0	0.043152	0	0	0
ENST00000330423	ENSG00000183785	TUBA8	0.000732	0	0.043146	0	0	0
ENST00000443697	ENSG00000182511	FES	0	0	0.043028	0	0	0
ENST00000517693	ENSG00000164808	SPIDR	0.005838	0.001936	0.04302	0.005176	0.000833	0.002779
ENST00000343837	ENSG00000188817	SNTN	0	0	0.042887	0	0	0.006369
ENST00000573580	ENSG00000122390	NAA60	0	0	0.042761	0.024672	0	0
ENST00000586622	ENSG00000092931	MFSD11	0	0	0.042553	0	0	0
ENST00000524213	ENSG00000147408	CSGALNACT1	0	0.03144	0.042447	0	0	0
ENST00000560123	ENSG00000157470	FAM81A	0.011191	0.005494	0.042385	0	0	0.017157
ENST00000393917	ENSG00000144834	TAGLN3	0.007896	0.000637	0.042385	0.015555	0	0
ENST00000557413	ENSG00000198208	RPS6KL1	0	0	0.042274	0.005949	0	0
ENST00000616276	ENSG00000167733	HSD11B1L	0	0	0.042154	0	0	0
ENST00000588949	ENSG00000134769	DTNA	0.005044	0	0.041838	0	0.002038	0
ENST00000401506	ENSG00000213626	LBH	0	9.3e-05	0.041806	0.003234	0	0.000331
ENST00000549649	ENSG00000088986	DYNLL1	0.006165	0	0.041557	0.016445	0.005418	0
ENST00000339423	ENSG00000167733	HSD11B1L	0	0	0.041506	0	0	0.013735
ENST00000555757	ENSG00000100744	GSKIP	0	0.018592	0.041426	0.027996	0	0
ENST00000496612	ENSG00000136147	PHF11	0	0.02181	0.041306	0.010141	0.006372	0
ENST00000570940	ENSG00000169992	NLGN2	0	0	0.040835	0	0	0
ENST00000443266	ENSG00000137094	DNAJB5	0	0	0.04083	0	0	0
ENST00000568647	ENSG00000005189	REXO5	0.012829	0.004652	0.040727	0.006955	0.005261	0
ENST00000439350	ENSG00000205464	ATP6AP1L	0	0	0.040719	0	0	0
ENST00000497890	ENSG00000196549	MME	0.005826	0	0.040702	0	0	0
ENST00000547818	ENSG00000167535	CACNB3	0	0	0.040606	0	0	0
ENST00000237172	ENSG00000118407	FILIP1	0	0	0.040532	0.006737	0	0.001756
ENST00000619596	ENSG00000007264	MATK	0	0	0.04051	0	0	0
ENST00000544021	ENSG00000139192	TAPBPL	0	0	0.040509	0	0	0
ENST00000503070	ENSG00000167083	GNGT2	0.007298	0.002427	0.040441	0.009791	0.003062	0.000703
ENST00000493166	ENSG00000106665	CLIP2	0.003713	0.004845	0.040438	0.005662	0.012008	0.005789
ENST00000568979	ENSG00000205336	ADGRG1	0	0	0.040311	0	0	0
ENST00000598041	ENSG00000142002	DPP9	0	0.003987	0.040222	0.014693	0	0.008953
ENST00000618150	ENSG00000125676	THOC2	0	0	0.040209	0	0	0
ENST00000651790	ENSG00000151914	DST	0	0.00632	0.040173	0	0	0
ENST00000584420	ENSG00000225190	PLEKHM1	0	0	0.039781	0	0	0
ENST00000535259	ENSG00000183454	GRIN2A	0	0	0.039526	0	0	0
ENST00000581842	ENSG00000087191	PSMC5	0	0	0.039421	0	0	0
ENST00000585350	ENSG00000171466	ZNF562	2.7e-05	0.008235	0.039063	0.004226	0.000234	0.000181
ENST00000606425	ENSG00000241058	NSUN6	0	0.005415	0.038938	0	0	0
ENST00000646367	ENSG00000171456	ASXL1	0	0.014012	0.038833	0	0.002856	0
ENST00000421664	ENSG00000115380	EFEMP1	0.00069	0.001304	0.038698	0.000665	0	0
ENST00000548504	ENSG00000037897	METTL1	0	0	0.038663	0	0	0
ENST00000559044	ENSG00000139946	PELI2	0	0	0.038641	0	0	0
ENST00000393482	ENSG00000135951	TSGA10	0	0	0.038399	0	0	0
ENST00000543283	ENSG00000107771	CCSER2	0.001594	0.000558	0.038385	0.002433	0.000226	0.001238
ENST00000520406	ENSG00000108852	MPP2	0	0	0.03837	0	0	0
ENST00000506146	ENSG00000174125	TLR1	0	0.004045	0.038202	0	0	0
ENST00000577499	ENSG00000174448	STARD6	0	0	0.038154	0	0	0
ENST00000335674	ENSG00000185962	LCE3A	0	0	0.038084	0	0	0
ENST00000392790	ENSG00000138161	CUZD1	0	0	0.038052	0	0	0
ENST00000647869	ENSG00000005302	MSL3	0	0.010763	0.038047	0	0.012052	0
ENST00000541565	ENSG00000054392	HHAT	0	0	0.037979	0	0	0
ENST00000454326	ENSG00000163596	ICA1L	0	0.000645	0.037944	0	0	0
ENST00000354772	ENSG00000092096	SLC22A17	0	0	0.037864	0	0.018893	0
ENST00000341863	ENSG00000108219	TSPAN14	0	0	0.037777	0	0	0
ENST00000588992	ENSG00000126246	IGFLR1	0	0.028204	0.037777	0	0	0
ENST00000368923	ENSG00000203797	DDO	0.00137	0	0.03773	0	0	0.002924
ENST00000557137	ENSG00000100612	DHRS7	0	0	0.037444	0	0	0
ENST00000618002	ENSG00000181031	RPH3AL	0.001274	0	0.037411	0	0.000308	0.001405
ENST00000539172	ENSG00000118557	PMFBP1	0	0	0.037285	0	0	0
ENST00000514416	ENSG00000145681	HAPLN1	0	0.005929	0.037265	0.015338	0	0.00478
ENST00000513095	ENSG00000087266	SH3BP2	0	0	0.036981	0	0	0
ENST00000332112	ENSG00000182585	EPGN	0.00541	0	0.036956	0	0	0.007526
ENST00000583953	ENSG00000173065	FAM222B	0	0	0.036879	0	0	0
ENST00000355178	ENSG00000152348	ATG10	0.000801	0.006927	0.036815	0.001248	0.001956	0.004002
ENST00000369386	ENSG00000148737	TCF7L2	0	0	0.036785	0	0	0
ENST00000536656	ENSG00000171608	PIK3CD	0.003124	0.013137	0.03676	0.016366	7e-05	0.004769
ENST00000647778	ENSG00000158169	FANCC	0	0	0.036465	8.6e-05	0	0
ENST00000600209	ENSG00000130475	FCHO1	0.002918	0	0.036381	0	0	0
ENST00000536741	ENSG00000186280	KDM4D	0	0	0.036374	0	0.021632	0
ENST00000512079	ENSG00000242110	AMACR	0	0	0.036094	0	0	0
ENST00000562737	ENSG00000125170	DOK4	0.002878	0.008984	0.036074	0.01643	0.007734	0
ENST00000533461	ENSG00000143442	POGZ	0	0.004491	0.035821	0	0	0
ENST00000473129	ENSG00000163607	GTPBP8	0	0.018607	0.035629	0	0	0
ENST00000260943	ENSG00000178568	ERBB4	0.011734	0	0.035626	0.003583	0	0.011035
ENST00000496770	ENSG00000160097	FNDC5	0	0	0.035474	0	0	0
ENST00000397680	ENSG00000160298	C21orf58	0	0	0.035317	0	0	0
ENST00000525878	ENSG00000009307	CSDE1	0	0	0.03524	0	0	0
ENST00000301258	ENSG00000167653	PSCA	0	0	0.035216	0	0	0.011181
ENST00000424049	ENSG00000144535	DIS3L2	0.011868	0	0.035189	0.0014	0.002795	0.003398
ENST00000436965	ENSG00000115648	MLPH	0.003159	0.005298	0.035156	0.020409	0	0
ENST00000531707	ENSG00000178685	PARP10	0	0	0.035135	0	0	0
ENST00000651333	ENSG00000157168	NRG1	0	0	0.03496	0	0	0
ENST00000313070	ENSG00000081803	CADPS2	0.007271	0.003461	0.034959	0.017895	0.00389	0
ENST00000398376	ENSG00000070808	CAMK2A	0	0	0.034892	0	0	0
ENST00000415565	ENSG00000131375	CAPN7	0.005041	0.004125	0.034483	0.003063	0.006817	0.003026
ENST00000611898	ENSG00000116996	ZP4	0.003185	0.013419	0.034344	0.004227	0.008341	0
ENST00000554279	ENSG00000100577	GSTZ1	0	0	0.03432	0	0	0
ENST00000434998	ENSG00000138380	CARF	0	0	0.034318	0	0	0
ENST00000519058	ENSG00000080823	MOK	0.002807	0.009839	0.034184	0.018643	0	0
ENST00000640713	ENSG00000145495	2021-03-06	0	0	0.03418	0	0	0
ENST00000586504	ENSG00000067836	ROGDI	0	0	0.034173	0	0	0
ENST00000345096	ENSG00000189375	TBC1D28	0	0.002983	0.033997	0.000798	0	0
ENST00000339298	ENSG00000180008	SOCS4	0.004316	0.006082	0.033935	0.003933	0.008094	0.004156
ENST00000422039	ENSG00000244405	ETV5	0	0	0.033893	0	0.006636	0.011186
ENST00000637071	ENSG00000186184	POLR1D	0.000216	0	0.033851	0.001125	0.00045	0.000558
ENST00000370231	ENSG00000183479	TREX2	0	0	0.03385	0	0	0
ENST00000645002	ENSG00000128739	SNRPN	0	0.003724	0.033709	0	0	0
ENST00000595676	ENSG00000268465	AC008403.2	0	0	0.03366	0	0	0
ENST00000566588	ENSG00000125170	DOK4	0	0	0.03354	0.009226	0	0
ENST00000587166	ENSG00000179954	SSC5D	0	0.001315	0.033518	0.005685	0.011757	0
ENST00000452077	ENSG00000105221	AKT2	0	0	0.033513	0	0	0
ENST00000409506	ENSG00000144488	ESPNL	0	0	0.03351	0	0	0
ENST00000609672	ENSG00000147065	MSN	0	0.001044	0.033495	0	0	0.001705
ENST00000287196	ENSG00000137817	PARP6	0.014092	0	0.033467	0.00274	0.002599	0.002409
ENST00000589520	ENSG00000131475	VPS25	0	0	0.033438	0	0	0
ENST00000476573	ENSG00000163389	POGLUT1	0	0	0.033416	0	0	0
ENST00000544492	ENSG00000136161	RCBTB2	0	0	0.033365	0	0	0
ENST00000542370	ENSG00000139194	RBP5	0	0	0.033347	0	0	0
ENST00000532960	ENSG00000149577	SIDT2	0	0	0.03306	0	0	0
ENST00000557115	ENSG00000198894	CIPC	0	0	0.032945	0.004703	0.004007	0
ENST00000529800	ENSG00000178773	CPNE7	0	0	0.032879	0	0	0
ENST00000636566	ENSG00000096093	EFHC1	0	0	0.032724	0	0	0
ENST00000612355	ENSG00000109819	PPARGC1A	0	0	0.032723	0	0	0
ENST00000283141	ENSG00000153157	SYCP2L	0	0	0.032709	0	0.021435	0
ENST00000621645	ENSG00000269713	NBPF9	0	0	0.032702	0	0	0
ENST00000409885	ENSG00000204334	ERICH2	0	0	0.032702	0	0	0
ENST00000540443	ENSG00000175003	SLC22A1	0.010607	0	0.032453	0	0	0
ENST00000557791	ENSG00000137776	SLTM	0	0	0.03222	0	0	0
ENST00000438445	ENSG00000138031	ADCY3	0	0	0.03179	0	0	0
ENST00000378569	ENSG00000108688	CCL7	0	0.010238	0.031649	0.01291	0	0
ENST00000403283	ENSG00000144504	ANKMY1	0.005908	0	0.031631	0	0	0
ENST00000466306	ENSG00000163467	TSACC	0	0.021034	0.031534	0	0	0
ENST00000354489	ENSG00000111837	MAK	0	0.012209	0.031452	0	0.008659	0.006131
ENST00000638386	ENSG00000204271	SPIN3	0.001836	0	0.031447	0	0	0
ENST00000591401	ENSG00000153443	UBALD1	0	0	0.031387	0	0	0
ENST00000591752	ENSG00000133275	CSNK1G2	0.008	0.006634	0.031191	0	0.001403	0.006886
ENST00000493485	ENSG00000198556	ZNF789	0	0	0.031174	0	0	0
ENST00000556775	ENSG00000188488	SERPINA5	0	0	0.030921	0	0	0
ENST00000422021	ENSG00000182983	ZNF662	0	0	0.030902	0	0	0
ENST00000412306	ENSG00000112773	TENT5A	0	0	0.030779	0	0	0
ENST00000541464	ENSG00000103534	TMC5	0	0	0.030708	0	0	0
ENST00000376765	ENSG00000204619	PPP1R11	0	0	0.030682	0	0	0
ENST00000509100	ENSG00000138757	G3BP2	0.004273	0	0.030501	0	0	0
ENST00000576117	ENSG00000103351	CLUAP1	0	0	0.030497	0	0	0.008771
ENST00000464672	ENSG00000128596	CCDC136	0	0	0.030492	0.006761	0	0
ENST00000558279	ENSG00000100938	GMPR2	0	0	0.030452	0	0	0
ENST00000360639	ENSG00000167173	C15orf39	0	0	0.030388	0	0	0
ENST00000638942	ENSG00000230257	NFE4	0.008077	0.00533	0.03027	0	0	0
ENST00000257861	ENSG00000135407	AVIL	0	0.01214	0.030257	0.023711	0	0
ENST00000639485	ENSG00000124313	IQSEC2	0	0	0.030213	0	0	0
ENST00000462075	ENSG00000196693	ZNF33B	0	0	0.030142	0	0	0
ENST00000502397	ENSG00000179387	ELMOD2	0	0.026444	0.030138	0	0	0
ENST00000422809	ENSG00000156273	BACH1	0	0.020491	0.030092	0.003199	0	0
ENST00000371460	ENSG00000196284	SUPT3H	0.005606	0.003264	0.030089	0.010359	0.004012	0.00487
ENST00000510541	ENSG00000080822	CLDND1	0	0.017571	0.030014	0.010522	0.000979	0.001326
ENST00000507618	ENSG00000091490	SEL1L3	0	0	0.029647	0	0	0
ENST00000533909	ENSG00000014216	CAPN1	0.004814	0.002171	0.02959	0.011883	0.003045	0.000126
ENST00000403470	ENSG00000019102	VSIG2	0	0.006986	0.029521	0	0	0
ENST00000494586	ENSG00000107771	CCSER2	0	0	0.029402	0	0	0
ENST00000598080	ENSG00000176472	ZNF575	0	0.010058	0.029379	0	0	0
ENST00000461689	ENSG00000114904	NEK4	0	0	0.029354	0	0	0
ENST00000644743	ENSG00000164093	PITX2	0.006051	1.2e-05	0.029304	0.002637	0.00271	0.002093
ENST00000460353	ENSG00000169255	B3GALNT1	0	0	0.029278	0	0	0
ENST00000505138	ENSG00000118482	PHF3	0	0	0.029248	0	0	0
ENST00000416505	ENSG00000104365	IKBKB	0	0	0.029206	0	0	0.012058
ENST00000338566	ENSG00000164129	NPY5R	0	0	0.029122	0	0	0
ENST00000409211	ENSG00000169554	ZEB2	0.004899	0.001193	0.029093	0	0	0.00485
ENST00000419067	ENSG00000106348	IMPDH1	0	0	0.02877	0	0	0
ENST00000423446	ENSG00000135919	SERPINE2	0	0.011321	0.028725	0.012553	0	0
ENST00000480691	ENSG00000157514	TSC22D3	0	0	0.028575	0	0	0
ENST00000531093	ENSG00000166444	ST5	0	0	0.028198	0	0	0
ENST00000582416	ENSG00000171962	DRC3	0	0.006175	0.028001	0	0	0
ENST00000492281	ENSG00000143748	NVL	0.011967	0.011616	0.027957	0	0	0.000198
ENST00000459764	ENSG00000107815	TWNK	0	0	0.027946	0	0	0
ENST00000565039	ENSG00000135702	CHST5	0	0	0.027928	0.004883	0	0
ENST00000416431	ENSG00000146215	CRIP3	0	0	0.02784	0	0	0
ENST00000507357	ENSG00000131381	RBSN	0	0	0.027832	0	0	0
ENST00000525080	ENSG00000179532	DNHD1	0	0.010443	0.027635	0	0	0
ENST00000525659	ENSG00000184371	CSF1	0	0	0.0275	0	0	0
ENST00000511657	ENSG00000121073	SLC35B1	0	0	0.027436	0	0	0
ENST00000567845	ENSG00000103196	CRISPLD2	0.006814	0	0.027422	0	0.014481	0
ENST00000376734	ENSG00000204616	TRIM31	0.008301	0	0.027402	0	0.00138	0.000161
ENST00000550423	ENSG00000089157	RPLP0	0	0	0.027396	0	0	0
ENST00000646283	ENSG00000073584	SMARCE1	0	0	0.027379	0	0.010983	0
ENST00000554710	ENSG00000140022	STON2	0	0	0.027366	0.012702	0	0
ENST00000395019	ENSG00000150281	CTF1	0	0.021964	0.027338	0	0	0
ENST00000520502	ENSG00000157168	NRG1	0	0	0.027294	0	0	0
ENST00000221700	ENSG00000186115	CYP4F2	0	0.001702	0.026873	0	0.017718	0
ENST00000541798	ENSG00000152137	HSPB8	0	0	0.026829	0	0.016473	0
ENST00000334035	ENSG00000113742	CPEB4	0	0	0.026683	0	0	0
ENST00000529175	ENSG00000147642	SYBU	0	0	0.026597	0	0	0
ENST00000311069	ENSG00000174788	PCP2	0	0	0.026474	0	0.016904	0
ENST00000570500	ENSG00000170291	ELP5	0.000158	0	0.026442	6.4e-05	0.000375	0.001328
ENST00000427114	ENSG00000184381	PLA2G6	0	0	0.026138	0	0	0
ENST00000416488	ENSG00000090612	ZNF268	0.000224	0.007198	0.026137	0.016713	0.001891	0.00158
ENST00000523716	ENSG00000104327	CALB1	0	0	0.025949	0	0	0
ENST00000514390	ENSG00000164162	ANAPC10	0.000108	0.000188	0.025915	0	0	0
ENST00000504190	ENSG00000174796	THAP6	0	0	0.025897	0	0	0
ENST00000504021	ENSG00000163913	IFT122	0	0.0078	0.025859	0.010141	0	0.00104
ENST00000381541	ENSG00000257046	AC011604.2	1e-06	0	0.025815	0.009032	0	0
ENST00000592241	ENSG00000090612	ZNF268	0	0	0.025632	0	0	0
ENST00000621380	ENSG00000133055	MYBPH	0	0	0.02563	0	0	0
ENST00000319651	ENSG00000176809	LRRC37A3	0	0	0.025551	0	0	0
ENST00000308208	ENSG00000173093	CCDC63	0	0.013495	0.025466	0	0	0
ENST00000392206	ENSG00000161249	DMKN	0	0	0.025419	0	0	0
ENST00000506372	ENSG00000145526	CDH18	0.000518	0.012068	0.025185	0	0.003123	0
ENST00000373545	ENSG00000067177	PHKA1	0	0	0.024996	0	0	0
ENST00000555927	ENSG00000197119	SLC25A29	0	0	0.024815	0	0	0
ENST00000369091	ENSG00000057657	PRDM1	0.005927	0	0.024568	0	0.001118	0.000864
ENST00000436663	ENSG00000180957	PITPNB	0	0.002965	0.024495	0.007388	0	0.003966
ENST00000457953	ENSG00000156113	KCNMA1	0	0	0.023987	0	0	0
ENST00000429164	ENSG00000198836	OPA1	0	0	0.023984	0	0	0
ENST00000400928	ENSG00000162572	SCNN1D	0	0	0.02397	0	0	0
ENST00000564806	ENSG00000149926	FAM57B	0	0	0.023956	0	0	0.003584
ENST00000400880	ENSG00000121797	CCRL2	0	0	0.023731	0	0	0
ENST00000617472	ENSG00000167608	TMC4	0	0.013693	0.023682	0	0	0
ENST00000512590	ENSG00000038427	VCAN	0	0	0.023666	0	0	0
ENST00000596559	ENSG00000198538	ZNF28	0	0	0.023534	0	0	0
ENST00000338051	ENSG00000181904	C5orf24	0.000344	0.001762	0.023439	0.000947	0.000839	0.000865
ENST00000418610	ENSG00000114279	FGF12	0.000174	0	0.023438	0	0	0
ENST00000496806	ENSG00000188994	ZNF292	0	0	0.022971	0	0	0
ENST00000536996	ENSG00000157837	SPPL3	0.005834	0	0.022918	0.002513	0	0
ENST00000436752	ENSG00000230601	TEX48	0	0	0.022851	0	0	0
ENST00000550188	ENSG00000101199	ARFGAP1	0	0	0.022847	0	0	0
ENST00000407073	ENSG00000204406	MBD5	0.006322	0.000875	0.022766	0	0.004105	0
ENST00000409783	ENSG00000132300	PTCD3	0	0	0.022743	0	0	0
ENST00000304778	ENSG00000175556	LONRF3	0	0.008258	0.022728	0	0	0
ENST00000419872	ENSG00000175287	PHYHD1	0	0	0.022696	0	0	0
ENST00000417686	ENSG00000180902	D2HGDH	0	0	0.022642	0	0	0
ENST00000377991	ENSG00000137103	TMEM8B	0	0.001092	0.022541	0.008265	0	0
ENST00000423625	ENSG00000108039	XPNPEP1	0.001108	0	0.022473	0	0.004366	0
ENST00000346198	ENSG00000148737	TCF7L2	0	0	0.022453	0	0	0
ENST00000372198	ENSG00000133665	DYDC2	0	0	0.022167	0	0	0
ENST00000443822	ENSG00000153790	C7orf31	0.002224	0.003445	0.022102	0.015373	0.000553	0.000174
ENST00000263036	ENSG00000123240	OPTN	0	0	0.021911	0	0	0
ENST00000267953	ENSG00000140379	BCL2A1	0	0	0.021874	0	0	0
ENST00000650233	ENSG00000183765	CHEK2	7.9e-05	0.001452	0.021738	0.000309	0	0.001101
ENST00000580235	ENSG00000169660	HEXD	0	0	0.021551	0	0	0
ENST00000639264	ENSG00000197147	LRRC8B	0	0	0.021522	0	0	0
ENST00000327451	ENSG00000182902	SLC25A18	0.002203	0.007927	0.02147	0	0	0.006716
ENST00000651332	ENSG00000197134	ZNF257	0	0	0.021463	0	0	0
ENST00000490547	ENSG00000132849	PATJ	4.9e-05	0.00057	0.021435	0.000118	6.6e-05	4.5e-05
ENST00000533902	ENSG00000150687	PRSS23	0	4e-06	0.021266	0	0	0
ENST00000358298	ENSG00000152455	SUV39H2	0	0	0.021216	0	0	0
ENST00000601533	ENSG00000132002	DNAJB1	0	0.003708	0.021193	0	0	0
ENST00000613445	ENSG00000079215	SLC1A3	0	0	0.021174	0.000444	0.000949	0.000352
ENST00000392258	ENSG00000064012	CASP8	0.006829	0	0.021099	0	0.005916	0.003991
ENST00000393852	ENSG00000115459	ELMOD3	0.001309	0.007048	0.020989	0.004253	0	0.005353
ENST00000565469	ENSG00000260286	ARMH2	0	0	0.020925	0	0	0
ENST00000447564	ENSG00000129646	QRICH2	0	0	0.020839	0	0	0
ENST00000379749	ENSG00000133110	POSTN	0	0	0.020746	0	0	0
ENST00000588982	ENSG00000184828	ZBTB7C	0	0.003351	0.020697	0	0	0
ENST00000509115	ENSG00000109685	NSD2	0.002086	0.000958	0.020687	0.001642	0.00214	4e-06
ENST00000581438	ENSG00000175224	ATG13	0.001311	0.015738	0.020599	0	6.5e-05	0
ENST00000380441	ENSG00000124588	NQO2	0	0	0.020558	0	0.011398	0
ENST00000393018	ENSG00000144230	GPR17	0	0	0.02054	0	0	0
ENST00000374975	ENSG00000198502	HLA-DRB5	0.006303	0	0.020508	0	0	0
ENST00000577917	ENSG00000167733	HSD11B1L	0	0	0.020406	0	0	0
ENST00000523113	ENSG00000285655	AC009879.2	0	0	0.020307	0	0	0
ENST00000308423	ENSG00000131471	AOC3	0	0.008298	0.020239	0	0.012959	0
ENST00000530285	ENSG00000124942	AHNAK	0.005293	0	0.02011	0	0	0.004028
ENST00000013125	ENSG00000012983	MAP4K5	0	0	0.02005	0	0	0
ENST00000613079	ENSG00000166897	ELFN2	0	0	0.019838	0	0	0
ENST00000549417	ENSG00000111052	LIN7A	0	0	0.019837	0	0	0
ENST00000558014	ENSG00000137872	SEMA6D	0	0	0.019749	0.007021	0	0
ENST00000592912	ENSG00000188629	ZNF177	0	0	0.019683	0	0	0
ENST00000382830	ENSG00000206106	KRTAP22-2	0	0	0.019637	0	0	0
ENST00000432496	ENSG00000145348	TBCK	0	7.7e-05	0.019407	0	4e-05	0
ENST00000548887	ENSG00000166987	MBD6	0	0	0.019397	0	0	0
ENST00000368722	ENSG00000143556	S100A7	0	0	0.019397	0	0	0
ENST00000536805	ENSG00000049883	PTCD2	0	0	0.019322	0	0.000486	0
ENST00000504542	ENSG00000082074	FYB1	0	0	0.019181	0	0	0
ENST00000463619	ENSG00000176978	DPP7	0	0	0.019154	0	0	0
ENST00000510732	ENSG00000175471	MCTP1	0.001613	0.014466	0.019057	0	0	0.001667
ENST00000588735	ENSG00000131095	GFAP	0	0	0.019	0	0	0
ENST00000391826	ENSG00000104951	IL4I1	0	0.010927	0.018947	0	0	0
ENST00000587337	ENSG00000168256	NKIRAS2	0	0	0.018874	0	0	0
ENST00000593236	ENSG00000168675	LDLRAD4	0	0	0.018872	0.009141	0	0
ENST00000639989	ENSG00000109339	MAPK10	0	0	0.018642	0	0	0
ENST00000619906	ENSG00000100077	GRK3	0	0	0.018625	0.003296	0	0.005511
ENST00000551193	ENSG00000064763	FAR2	0.007319	0.006171	0.018622	0.00411	0.003485	8e-06
ENST00000646660	ENSG00000074800	ENO1	0	0	0.018609	0	0	0.005864
ENST00000457035	ENSG00000101844	ATG4A	0	0	0.018571	0	0	0
ENST00000636096	ENSG00000283599	BX276092.9	0	0.003014	0.018552	0	0.013907	0
ENST00000471893	ENSG00000185008	ROBO2	0	0	0.018429	0	0	0.001889
ENST00000590635	ENSG00000060069	CTDP1	0	0	0.018426	0	0	0
ENST00000525791	ENSG00000137707	BTG4	0	0	0.018349	0	0	0
ENST00000561675	ENSG00000141013	GAS8	0	0	0.01833	0	0	0
ENST00000553397	ENSG00000166888	STAT6	0.005421	0	0.018241	0	0	0.006563
ENST00000476323	ENSG00000256053	APOPT1	0	0	0.018193	0	0	0
ENST00000577092	ENSG00000120094	HOXB1	0	0	0.01813	0	0	0
ENST00000359617	ENSG00000124222	STX16	0	0	0.018087	0	0	0
ENST00000236914	ENSG00000116833	NR5A2	0	0.004223	0.017979	0	0	0.005993
ENST00000482047	ENSG00000136861	CDK5RAP2	0.006045	0	0.017947	0	0	0
ENST00000436038	ENSG00000197448	GSTK1	0	0	0.017691	0	0	0
ENST00000646988	ENSG00000110911	SLC11A2	0	0	0.01762	0	0	0
ENST00000494173	ENSG00000169255	B3GALNT1	0	0	0.017558	0	0	0
ENST00000625807	ENSG00000184203	PPP1R2	0	0	0.017528	0.002255	0	0
ENST00000411638	ENSG00000185049	NELFA	0.000856	0.003612	0.017525	0.002963	0.000893	0.009222
ENST00000571580	ENSG00000059122	FLYWCH1	0	0.014497	0.017521	0	0	0
ENST00000445983	ENSG00000125931	CITED1	0	0	0.017502	0	0.002772	0.0032
ENST00000335568	ENSG00000135226	UGT2B28	0.004284	0	0.017466	0	0	0
ENST00000375741	ENSG00000102606	ARHGEF7	0	0.000889	0.017463	0.001223	0.000634	0
ENST00000585967	ENSG00000071655	MBD3	2.4e-05	0	0.017432	0.005571	0	0
ENST00000436527	ENSG00000197471	SPN	0	0	0.017344	0.00236	0.000802	0.00176
ENST00000405535	ENSG00000163472	TMEM79	0	0	0.017296	0	0	0
ENST00000329722	ENSG00000184530	C6orf58	0.004738	0	0.017237	0	0	0
ENST00000407521	ENSG00000116731	PRDM2	0	0	0.017139	0	0	0.003836
ENST00000529748	ENSG00000134802	SLC43A3	0	0.007458	0.017102	0	0	0
ENST00000638309	ENSG00000266173	STRADA	0.007108	0.004126	0.017097	0	0.003183	0.001416
ENST00000414534	ENSG00000186132	C2orf76	0	0	0.017079	0	0	0
ENST00000330020	ENSG00000241149	AC115220.1	0.005369	0	0.017035	0	0.007222	0
ENST00000398058	ENSG00000160216	AGPAT3	0.000983	0.003836	0.016897	0.000297	0	0.000864
ENST00000597969	ENSG00000063127	SLC6A16	0	0	0.016893	0	0	0
ENST00000600821	ENSG00000196214	ZNF766	0.004981	0	0.016891	0	0	0
ENST00000458603	ENSG00000116044	NFE2L2	0	0	0.016856	0	0	0
ENST00000561522	ENSG00000103248	MTHFSD	0	0	0.016854	0	0	0
ENST00000436918	ENSG00000117298	ECE1	0	7.7e-05	0.016797	0.002337	0	0
ENST00000588983	ENSG00000007264	MATK	0	0	0.016667	0	0	0
ENST00000375150	ENSG00000204314	PRRT1	0.001479	0.004821	0.016545	0.006059	0	0
TCONS_00000893	XLOC_000647	XLOC_000647	0.003011	0	0.016325	0	0	0
ENST00000548341	ENSG00000091039	OSBPL8	0.007852	0.003633	0.016315	0	0.004582	0
ENST00000537753	ENSG00000187726	DNAJB13	0	0	0.016292	0	0	0.000906
ENST00000651629	ENSG00000244752	CRYBB2	0	0	0.01624	0	0	0
ENST00000559139	ENSG00000137843	PAK6	0	0	0.016214	0.005653	0	0
ENST00000492492	ENSG00000173890	GPR160	0	0	0.016183	0	0	0
ENST00000641208	ENSG00000109339	MAPK10	0	0	0.016138	0	0.008615	0
ENST00000599844	ENSG00000134769	DTNA	0	0	0.016031	0	0	0
ENST00000509773	ENSG00000136504	KAT7	0	0	0.015995	0	0	0
ENST00000504912	ENSG00000164185	ZNF474	0	0	0.015971	0	0	0
ENST00000513455	ENSG00000109680	TBC1D19	0	0.005038	0.015928	0	0	0
ENST00000414984	ENSG00000011376	LARS2	0	0	0.015882	0	0	0
ENST00000284322	ENSG00000154175	ABI3BP	0.005163	0	0.01585	0	0	0.001236
ENST00000413316	ENSG00000123983	ACSL3	0	0.010753	0.015688	0	0	0
ENST00000461628	ENSG00000137203	TFAP2A	0	0	0.015662	0.000264	0.002538	0
ENST00000374505	ENSG00000011009	LYPLA2	0	0	0.01542	0	0	0
ENST00000361084	ENSG00000132698	RAB25	0	0	0.015355	0	0	0
ENST00000539799	ENSG00000182667	NTM	0	0	0.015247	0	0	0
ENST00000494364	ENSG00000166922	SCG5	0	0	0.015204	0	0	0
ENST00000574638	ENSG00000173868	PHOSPHO1	0	0	0.015183	0	0	0
ENST00000594467	ENSG00000181027	FKRP	0	0	0.015174	0	0	0
ENST00000412160	ENSG00000179603	GRM8	0	0	0.015125	0	0	0.006324
ENST00000356873	ENSG00000196990	FAM163B	0	0	0.015111	0	0	0
ENST00000589704	ENSG00000063245	EPN1	0	0	0.015093	0	0.004597	0
ENST00000647684	ENSG00000100122	CRYBB1	0	0	0.015013	0	0	0
ENST00000551835	ENSG00000178498	DTX3	0	0	0.014962	0	0	0
ENST00000569375	ENSG00000159625	DRC7	0	0	0.014915	0	0	0
ENST00000640220	ENSG00000003989	SLC7A2	0	0.000311	0.014883	0	0	0
ENST00000391415	ENSG00000212722	KRTAP4-9	0	0.006262	0.014771	0	0.009069	0
ENST00000489868	ENSG00000284862	CCDC39	0	0	0.014664	0	0	0.003302
ENST00000429658	ENSG00000087077	TRIP6	0	0	0.014643	0	0	0
ENST00000522893	ENSG00000104714	ERICH1	0.001877	0.000285	0.014485	0.003481	0.000936	0.001007
ENST00000373869	ENSG00000157343	ARMC12	0	0	0.014381	0	0	0
ENST00000302797	ENSG00000170255	MRGPRX1	0	0	0.014362	0	0	0
ENST00000344138	ENSG00000100351	GRAP2	0.004068	0.002588	0.014309	0.000763	0	0
ENST00000295379	ENSG00000163217	BMP10	0.001305	0.001378	0.014119	0.003465	0	0
ENST00000360945	ENSG00000196860	TOMM20L	0.006167	0	0.014078	0	0.004101	0
ENST00000583676	ENSG00000258890	CEP95	0.000189	0	0.013859	0	0	0
ENST00000542224	ENSG00000152936	LMNTD1	0	0	0.01374	0	0	0
ENST00000558407	ENSG00000140368	PSTPIP1	0	0	0.013634	0	0	0
ENST00000614126	ENSG00000095059	DHPS	0	0	0.013565	0	0	0
ENST00000366730	ENSG00000143774	GUK1	0	0	0.013548	0	0	0
ENST00000358991	ENSG00000176771	NCKAP5	0	0	0.013508	0	0	0
ENST00000368779	ENSG00000187173	LCE2A	0	0	0.013481	0	0	0
ENST00000635838	ENSG00000283208	AC001226.2	0	0	0.013469	0	0	0
ENST00000576122	ENSG00000108561	C1QBP	0	0	0.013442	0.005076	0	0
ENST00000437439	ENSG00000182621	PLCB1	0	0	0.01331	0	0	0
ENST00000446170	ENSG00000073849	ST6GAL1	0.004718	0.005775	0.013254	0	0	0
ENST00000592685	ENSG00000065989	AC011529.1	0.000114	0	0.013225	0	0	0
ENST00000535523	ENSG00000080572	PIH1D3	0	0.00432	0.013162	0	0	0.005104
ENST00000419475	ENSG00000177096	PHETA2	0	0	0.013091	0	0	0
ENST00000528282	ENSG00000079819	EPB41L2	0	0	0.013034	0.001947	0.002208	0
ENST00000555576	ENSG00000258947	TUBB3	0	0	0.013024	0	0	0
ENST00000276943	ENSG00000147896	IFNK	0	0.007274	0.012986	0	0	0
ENST00000372393	ENSG00000130707	ASS1	0	0	0.012982	0	0	0
ENST00000544969	ENSG00000211455	STK38L	0.001997	0	0.012967	0	0	0
ENST00000536729	ENSG00000134532	SOX5	0	0	0.01293	0	0	0
ENST00000640007	ENSG00000108433	GOSR2	0.000519	0.000272	0.012912	0.000585	0.000981	0.001089
ENST00000484866	ENSG00000121864	ZNF639	0	0.010395	0.012813	0	0	0
ENST00000561782	ENSG00000205336	ADGRG1	0.005251	0.00289	0.012797	0.006837	0	0
ENST00000382828	ENSG00000206105	KRTAP20-4	0	0.001486	0.012716	0	0	0
ENST00000554868	ENSG00000170633	RNF34	0	0	0.012641	0	0	0
ENST00000447335	ENSG00000082126	MPP4	0	0	0.012627	0	0	0
ENST00000550596	ENSG00000178498	DTX3	0	0	0.012588	0	0	0
ENST00000583203	ENSG00000133313	CNDP2	0	0	0.012568	0.004216	0	0
ENST00000581773	ENSG00000167733	HSD11B1L	0	0	0.012549	0	0	0
ENST00000643604	ENSG00000159023	EPB41	0	0	0.012484	0	0	0
ENST00000644097	ENSG00000165699	TSC1	0.004961	0.00294	0.012484	0.001306	0.000355	0.003836
ENST00000580464	ENSG00000176809	LRRC37A3	0	0	0.012392	0	0	0
ENST00000601804	ENSG00000197937	ZNF347	0	0.004194	0.012334	0	0.004901	0
ENST00000524723	ENSG00000149547	EI24	0	0	0.01227	0	0	0
ENST00000586858	ENSG00000129991	TNNI3	0	0	0.012261	0	0	0
ENST00000476753	ENSG00000113966	ARL6	0	0	0.012202	0	0.004144	0
ENST00000298681	ENSG00000165794	SLC39A2	0.002384	0	0.012176	0	0	0
ENST00000354384	ENSG00000230873	STMND1	0	0	0.012168	0	0	0
ENST00000600213	ENSG00000269028	MTRNR2L12	0	0.003939	0.012137	0	0	0
ENST00000272644	ENSG00000144230	GPR17	0	0	0.012056	0	0	0
ENST00000245448	ENSG00000125375	DMAC2L	0	0	0.012047	0	0	0
ENST00000411611	ENSG00000101194	SLC17A9	0	0	0.012046	0	0	0
ENST00000540131	ENSG00000105245	NUMBL	0	0	0.011972	0	0	0
ENST00000344791	ENSG00000183060	LYSMD4	0	0	0.011938	0	0	0
ENST00000565335	ENSG00000138629	UBL7	0	0	0.011888	0	0	0
ENST00000612060	ENSG00000183873	SCN5A	0	0	0.011837	0	0	0
ENST00000566465	ENSG00000050820	BCAR1	0	0	0.011823	0	0	0
ENST00000355209	ENSG00000100413	POLR3H	0.001034	0.000121	0.011666	0.000432	0.000438	0.00056
ENST00000445484	ENSG00000088876	ZNF343	0	0	0.011609	0	0	0
ENST00000358700	ENSG00000167377	ZNF23	0.003682	0	0.011544	0.004414	7.4e-05	0
ENST00000408894	ENSG00000176406	RIMS2	0	0	0.011502	0	0	0
ENST00000584150	ENSG00000072134	EPN2	0	0	0.011498	0	0	0
ENST00000437458	ENSG00000114745	GORASP1	0	0	0.011399	0	0	0
TCONS_00211928	XLOC_079727	XLOC_079727	0	0	0.011391	0	0	0
ENST00000329016	ENSG00000184985	SORCS2	0	0	0.011257	0	0	0
ENST00000519289	ENSG00000104205	SGK3	0.000492	0.003425	0.011244	0	0	0
ENST00000378434	ENSG00000139679	LPAR6	0	0	0.011217	0	0	0
ENST00000587244	ENSG00000166569	CPLX4	0	0	0.01115	0	0	0
ENST00000381470	ENSG00000158856	DMTN	0	0	0.011141	0	0	0
ENST00000314756	ENSG00000149292	TTC12	4.4e-05	0	0.011073	0.002156	0.000264	0.001987
ENST00000641172	ENSG00000155249	OR4K1	0	0	0.010943	0	0	0
ENST00000225387	ENSG00000108255	CRYBA1	0	0	0.010913	0	0	0
ENST00000601600	ENSG00000125755	SYMPK	0	0	0.010857	0	0	0
ENST00000485919	ENSG00000136147	PHF11	9.2e-05	0	0.01081	0	0	0
ENST00000495694	ENSG00000122085	MTERF4	0	0	0.010803	0	0	0
ENST00000563369	ENSG00000166548	TK2	0	0	0.0108	0.005473	0	0
ENST00000490242	ENSG00000198542	ITGBL1	0	0	0.010794	0	0	0
ENST00000417165	ENSG00000128512	DOCK4	0	0	0.010738	0	0	0
ENST00000302005	ENSG00000169271	HSPB3	0	0	0.010697	0	0	0
ENST00000354194	ENSG00000182853	VMO1	0.002663	0	0.010689	0	0.003949	0
ENST00000568588	ENSG00000174444	RPL4	0	0	0.010676	0	0	0
ENST00000437268	ENSG00000184792	OSBP2	0.000948	0	0.010648	0	0	0
ENST00000441637	ENSG00000055955	ITIH4	0	0	0.01064	0	0	0.004205
ENST00000532201	ENSG00000171492	LRRC8D	0	0	0.010626	0	0	0.000878
ENST00000412481	ENSG00000019169	MARCO	0	0	0.010563	0	0.005085	0
ENST00000455425	ENSG00000100399	CHADL	0	0	0.010495	0	0	0
ENST00000397147	ENSG00000100365	NCF4	0	0	0.010402	0	0	0
ENST00000609853	ENSG00000148429	USP6NL	0	0	0.0104	0	0.004291	0
ENST00000409380	ENSG00000138079	SLC3A1	0	0	0.010395	0	0	0
ENST00000347978	ENSG00000107831	FGF8	0	0	0.010383	0	0	0
ENST00000647309	ENSG00000111913	RIPOR2	0	0	0.010348	0	0	0
ENST00000190165	ENSG00000064218	DMRT3	0	0	0.010283	0	0	0
ENST00000450295	ENSG00000187764	SEMA4D	0.001123	0	0.010277	0	0	0.001179
ENST00000250831	ENSG00000226941	RBMY1J	0	0	0.010255	0	0	0
ENST00000648539	ENSG00000156650	KAT6B	0.000885	8.5e-05	0.010248	0.000317	0	0
ENST00000435339	ENSG00000147145	LPAR4	0	0	0.010161	6e-06	0	0
ENST00000379538	ENSG00000064692	SNCAIP	0	0	0.010115	0	0	0
ENST00000393526	ENSG00000168754	FAM178B	0	0	0.010065	0	0	0
ENST00000400959	ENSG00000009790	TRAF3IP3	0	0	0.010033	0.00483	0	0
ENST00000520795	ENSG00000076554	TPD52	0	0	0.009997	0	0	0
ENST00000458071	ENSG00000161249	DMKN	0	0	0.009973	0	0	0
ENST00000591522	ENSG00000167216	KATNAL2	0	0	0.009958	0	0	0
ENST00000539744	ENSG00000152936	LMNTD1	0	0.002406	0.009852	0	0	0.005686
ENST00000450894	ENSG00000132470	ITGB4	0	0	0.009814	0.004572	0	0
ENST00000601430	ENSG00000256683	ZNF350	0	0	0.009789	0	0	0
ENST00000309017	ENSG00000143851	PTPN7	0	0.00663	0.009785	0	0	0
ENST00000355870	ENSG00000196335	STK31	0	0	0.00975	0	0	0
ENST00000327673	ENSG00000123500	COL10A1	0.004505	0.001811	0.009747	0	0	0
ENST00000511651	ENSG00000168785	TSPAN5	0	0.008399	0.009724	0	0	0
ENST00000441368	ENSG00000065665	SEC61A2	0	0	0.009686	0	0	0
ENST00000545133	ENSG00000118307	CASC1	0	0.007196	0.009654	0	0	0
ENST00000428855	ENSG00000100031	GGT1	0	0	0.009628	0	0	0
ENST00000371253	ENSG00000153292	ADGRF1	0	0.002987	0.009567	0.004774	0	0
ENST00000527088	ENSG00000150672	DLG2	0	0	0.009557	0	0	0
ENST00000648651	ENSG00000197879	MYO1C	0	0	0.009526	0.002079	0	0
ENST00000621771	ENSG00000184471	C1QTNF8	0	0	0.009442	0	0	0
ENST00000443478	ENSG00000117013	KCNQ4	0.00071	0	0.009382	0.003264	0	0
ENST00000429817	ENSG00000223609	HBD	0	0	0.009349	0	0	0
ENST00000548839	ENSG00000090382	LYZ	0	0	0.009341	0	0	0
ENST00000639969	ENSG00000283988	TAF11L9	0	0	0.009304	0.00219	0	0
ENST00000505853	ENSG00000146021	KLHL3	0	0	0.009303	0	0	0
ENST00000380032	ENSG00000120160	EQTN	0	0	0.009196	0	0	0
ENST00000648509	ENSG00000141527	CARD14	0	0.004441	0.009194	0.003198	0	0
ENST00000627720	ENSG00000175274	TP53I11	0	0	0.009183	0	0	0
ENST00000456256	ENSG00000137841	PLCB2	0	0	0.009179	0	0	0
ENST00000423590	ENSG00000135164	DMTF1	0	0.004984	0.009146	0	0	0
ENST00000369461	ENSG00000134253	TRIM45	0	0	0.009135	0	0	0
ENST00000414568	ENSG00000188191	PRKAR1B	0	0	0.009051	0	0	0
ENST00000579788	ENSG00000108622	ICAM2	0	0	0.009	0	0	0
ENST00000330330	ENSG00000174876	AMY1B	0	0	0.008981	0	0	0
ENST00000567504	ENSG00000065054	SLC9A3R2	0	0	0.00893	0	0	0
ENST00000441547	ENSG00000163596	ICA1L	0	0	0.008873	0	0	0
ENST00000373680	ENSG00000148215	OR5C1	0	0	0.008873	0	0	0
ENST00000337103	ENSG00000165084	C8orf34	0.002078	0.002278	0.008753	0	0	0.001292
ENST00000509001	ENSG00000118194	TNNT2	0	0.003299	0.008682	0	0	0.006182
ENST00000371037	ENSG00000118473	SGIP1	0.002612	0.003194	0.008678	0	0.000819	0.002133
ENST00000475786	ENSG00000065809	FAM107B	0	0	0.008652	0	0	0
ENST00000538227	ENSG00000021300	PLEKHB1	1.5e-05	0	0.008472	0	0	0
ENST00000366485	ENSG00000241128	OR14A2	0	0	0.00844	0	0	0
ENST00000395733	ENSG00000100253	MIOX	0	0	0.008369	0	0	0
ENST00000530271	ENSG00000060237	WNK1	0.001552	0.000464	0.008356	0	0	0
ENST00000507557	ENSG00000174796	THAP6	0	0.001775	0.008323	0	0	0
ENST00000274507	ENSG00000145826	LECT2	0	0	0.008272	0	0	0
ENST00000399044	ENSG00000214819	CDRT15L2	0	0	0.008154	0	0	0
ENST00000537828	ENSG00000133106	EPSTI1	0	0	0.008124	0	0	0
ENST00000492775	ENSG00000178460	MCMDC2	0	0	0.008068	0	0	0
ENST00000647401	ENSG00000115355	CCDC88A	0	0	0.008059	0	0	0
ENST00000620997	ENSG00000120500	ARR3	0.001705	0	0.008025	0	0	0
ENST00000378988	ENSG00000099399	MAGEB2	0	0	0.007976	0	0	0
ENST00000331427	ENSG00000183034	OTOP2	0	0	0.00796	0	0	0
ENST00000521694	ENSG00000104368	PLAT	0	0.000606	0.007938	0.003652	0	0
ENST00000420971	ENSG00000100351	GRAP2	0	0	0.007933	0	0	0
ENST00000560417	ENSG00000075413	MARK3	0.002256	0.002084	0.007933	0	0	0.002214
ENST00000417814	ENSG00000120949	TNFRSF8	0	0	0.007926	0	0	0
ENST00000644793	ENSG00000100983	GSS	0	0	0.007916	0	0	0
ENST00000515287	ENSG00000168785	TSPAN5	0.001582	0	0.007894	0	0	0.001957
ENST00000606127	ENSG00000143355	LHX9	0	0	0.007871	0	0	0
ENST00000520660	ENSG00000198939	ZFP2	0	0	0.007841	0	0	0
ENST00000520880	ENSG00000164932	CTHRC1	0.000281	0	0.007734	0	0	0
ENST00000535679	ENSG00000138068	SULT6B1	0	0	0.007712	0	0	0
ENST00000647816	ENSG00000174776	WDR49	0	0.002501	0.007705	0.003143	0	0.00221
ENST00000527935	ENSG00000135373	EHF	0	0	0.007671	0	0	0
ENST00000307367	ENSG00000171365	CLCN5	0	0	0.007653	0	0	0
ENST00000312777	ENSG00000139437	TCHP	0	0	0.00761	0	0	0
ENST00000570387	ENSG00000141456	PELP1	0	0.000492	0.007602	0	0	0
ENST00000373032	ENSG00000138308	PLA2G12B	0	0	0.007575	0	0	0
ENST00000545699	ENSG00000111305	GSG1	0	0.0032	0.007572	0	0	0
ENST00000535129	ENSG00000021300	PLEKHB1	5.8e-05	0	0.007506	0	0	0.003725
ENST00000297375	ENSG00000164778	EN2	0	0	0.007501	0	0	0
ENST00000396972	ENSG00000140265	ZSCAN29	0.000233	0	0.007372	0.000996	0.000768	0.000792
ENST00000629231	ENSG00000149182	ARFGAP2	6.4e-05	0	0.007342	7.2e-05	0.00272	1e-05
ENST00000453446	ENSG00000139631	CSAD	0	0.002481	0.007337	0	0	0
ENST00000246646	ENSG00000171360	KRT38	0	0	0.007313	0	0	0
ENST00000523729	ENSG00000006747	SCIN	0	0	0.007304	0	0	0
ENST00000617865	ENSG00000182326	C1S	0.000679	0	0.007272	0	0.000621	0.001511
ENST00000550233	ENSG00000198270	TMEM116	0	0	0.007199	0	0	0
ENST00000235349	ENSG00000243073	PRAMEF4	0	0	0.00716	0	0	0
ENST00000311378	ENSG00000173714	WFIKKN2	0	0	0.007145	0	0	0
ENST00000602866	ENSG00000165916	PSMC3	0	8e-06	0.007093	0	0	0
ENST00000572887	ENSG00000102967	DHODH	8.4e-05	0.000103	0.007093	6.3e-05	0	0.000145
ENST00000642079	ENSG00000185988	PLK5	0	0	0.007076	0	0.001119	0.002491
ENST00000611490	ENSG00000064687	ABCA7	0.000432	7e-06	0.007051	0.000544	0.000819	0.000584
ENST00000644266	ENSG00000124343	XG	0	0	0.007048	0.003532	0	0
ENST00000374448	ENSG00000030304	MUSK	0	0	0.007036	0	0	0
ENST00000588928	ENSG00000131477	RAMP2	0.001639	0	0.007035	0	0	0.002561
ENST00000611855	ENSG00000179242	CDH4	0	0	0.007033	0	0	0
ENST00000491000	ENSG00000163617	CCDC191	0	0	0.00702	0	0	0
ENST00000320362	ENSG00000125454	SLC25A19	0	0	0.006998	0	0	0
ENST00000368744	ENSG00000203783	PRR9	0	0	0.006993	0	0	0
ENST00000517656	ENSG00000044115	CTNNA1	0	0	0.006986	0	0	0
ENST00000556134	ENSG00000100578	KIAA0586	0	0	0.006966	0	0	0
ENST00000392025	ENSG00000160460	SPTBN4	0	0	0.006939	0	0	0
ENST00000249079	ENSG00000128346	C22orf23	0	0	0.006889	0	0	0
ENST00000618673	ENSG00000142765	SYTL1	0	0	0.00687	0	0	0
ENST00000369423	ENSG00000124334	IL9R	0	0	0.006855	0	0	0
ENST00000515799	ENSG00000039560	RAI14	0.000377	0.001394	0.00685	0	0	0.002183
ENST00000416565	ENSG00000163516	ANKZF1	0.000827	0.003478	0.006841	0	0	0.000675
ENST00000441259	ENSG00000180644	PRF1	0	0	0.006836	0	0	0
ENST00000450363	ENSG00000072041	SLC6A15	0	0	0.006789	0	0	0
ENST00000368742	ENSG00000203782	LOR	0	0	0.006776	0	0	0
ENST00000449732	ENSG00000153046	CDYL	0.003019	0.001945	0.006769	0	0	0.002994
ENST00000514116	ENSG00000114547	ROPN1B	0	0	0.006751	0	0	0
ENST00000637919	ENSG00000182621	PLCB1	0	0	0.00674	0	0	0
ENST00000286355	ENSG00000155897	ADCY8	0	0.003298	0.006672	0	0.003094	0
ENST00000445772	ENSG00000160791	CCR5	0	0	0.006614	0	0	0
ENST00000576334	ENSG00000189067	LITAF	0	0	0.006609	0	0	0
ENST00000439702	ENSG00000106608	URGCP	0	0	0.00657	0	0	0
ENST00000544260	ENSG00000129422	MTUS1	0.000433	0	0.006559	0	0	0.001105
ENST00000614383	ENSG00000204514	ZNF814	0.000208	0.00133	0.006555	0.000243	0.001373	0.001571
ENST00000287042	ENSG00000156486	KCNS2	0	0	0.006549	0.002004	0	0
ENST00000434640	ENSG00000137274	BPHL	0	4.5e-05	0.00652	0	0	0
ENST00000371467	ENSG00000138207	RBP4	0	0	0.006503	0	0	0
ENST00000607681	ENSG00000105856	HBP1	2.4e-05	0.005012	0.006491	1e-06	5e-06	0.000686
ENST00000368764	ENSG00000163207	IVL	0	0.003866	0.006486	0	0	0
ENST00000344415	ENSG00000189152	GRAPL	0.002099	0.001282	0.006479	0.0004	0.001303	0
ENST00000329494	ENSG00000089091	DZANK1	0	0	0.00647	0	0	0
ENST00000424496	ENSG00000225528	Z82206.1	0	0	0.006464	0	0	0
ENST00000371432	ENSG00000124813	RUNX2	0	0	0.006409	0	0	0
ENST00000560473	ENSG00000169926	KLF13	0	0	0.006407	0	0.002217	0
ENST00000335271	ENSG00000047849	MAP4	0	0	0.00639	0	0	0
ENST00000309691	ENSG00000132185	FCRLA	0	0	0.006359	0	0	0
ENST00000442245	ENSG00000170370	EMX2	0	0	0.006306	0	0	0
ENST00000369630	ENSG00000184599	FAM19A3	0	0	0.006274	0	0	0
ENST00000581381	ENSG00000173065	FAM222B	0	0	0.006265	0	0	0
ENST00000512042	ENSG00000196104	SPOCK3	0	0	0.006257	0	0	0
ENST00000379595	ENSG00000140368	PSTPIP1	0	0	0.006206	0	0	0
ENST00000572369	ENSG00000070366	SMG6	0	0	0.006201	0.000911	0	0
ENST00000558207	ENSG00000157766	ACAN	0	0	0.006164	0	0	0
ENST00000555211	ENSG00000151327	FAM177A1	0	0	0.006111	0	0	0
ENST00000590230	ENSG00000197561	ELANE	0	0	0.006101	0	0	0
ENST00000646131	ENSG00000107736	CDH23	0	0	0.006091	0	0	0
ENST00000621635	ENSG00000010671	BTK	0	0	0.00606	0	0	0
ENST00000590938	ENSG00000184640	2021-09-09	0	0	0.006059	0	0	0
ENST00000537749	ENSG00000077458	FAM76B	8.9e-05	4.4e-05	0.006046	0.000192	7.8e-05	0.000119
ENST00000559241	ENSG00000103740	ACSBG1	0	0	0.00604	0	0	0
ENST00000480552	ENSG00000133606	MKRN1	0	0	0.005998	1e-06	0	0
ENST00000643940	ENSG00000060709	RIMBP2	0	0	0.005942	0	0	0
ENST00000533968	ENSG00000066336	SPI1	0	0	0.005939	0	0	0
ENST00000405677	ENSG00000100029	PES1	0.001276	0	0.005939	0	0.00103	0.000385
ENST00000340112	ENSG00000188050	RNF133	0	0	0.005914	0	0	0
ENST00000276241	ENSG00000169551	CT55	0	0	0.005914	0	0	0
ENST00000535113	ENSG00000184949	FAM227A	0	0	0.005913	0	0	0
ENST00000602198	ENSG00000131126	TEX101	0	0	0.005909	0	0	0
ENST00000425035	ENSG00000138029	HADHB	0	0	0.005893	0	0	0
ENST00000574902	ENSG00000085644	ZNF213	0	0	0.005863	0	0	0
ENST00000330523	ENSG00000182931	WFDC10B	0	0	0.005862	0	0	0
ENST00000333538	ENSG00000185274	GALNT17	0	0	0.005855	0	0	0
ENST00000336374	ENSG00000160870	CYP3A7	0	0	0.005809	0	0	0
ENST00000583280	ENSG00000141627	DYM	0	0	0.005799	0	0	0
ENST00000225550	ENSG00000108417	KRT37	0	0	0.005793	0	0	0
ENST00000402971	ENSG00000182083	OR6B2	0	0	0.005727	0	0	0
ENST00000577195	ENSG00000072134	EPN2	0	0	0.005726	0	0	0
ENST00000425009	ENSG00000185269	NOTUM	0	0	0.005701	0	0	0
ENST00000359801	ENSG00000196209	SIRPB2	0	0	0.0057	0	0	0
ENST00000318528	ENSG00000177459	ERICH5	0	0	0.005685	0	0	0
ENST00000640231	ENSG00000109911	ELP4	0	0	0.005668	0	0	0.002981
ENST00000371150	ENSG00000132854	KANK4	0	0	0.005653	0	0	0
ENST00000280605	ENSG00000151005	TKTL2	0	0	0.005602	0	0	0
ENST00000249044	ENSG00000128313	APOL5	0	0	0.005585	0	0	0
ENST00000296555	ENSG00000109670	FBXW7	0.0008	0	0.005582	0	0	0
ENST00000436683	ENSG00000141456	PELP1	0.001419	0.002928	0.00558	0.000416	0.000298	0.000831
ENST00000366697	ENSG00000162931	TRIM17	0	0.004241	0.005576	0	0	0
ENST00000444428	ENSG00000146540	C7orf50	0	0	0.005562	0	0	0
ENST00000368666	ENSG00000112761	CCN6	0	0	0.005554	0	0	0
ENST00000395648	ENSG00000175274	TP53I11	0	0.000451	0.005548	0.000291	0	0
ENST00000423529	ENSG00000167614	TTYH1	0	0	0.00553	0	0	0
ENST00000377252	ENSG00000120594	PLXDC2	0.000642	0.001695	0.005527	0	0	0
ENST00000409494	ENSG00000239389	PCDHA13	0	0	0.005503	0	0	0
ENST00000296218	ENSG00000163879	DNALI1	0	0	0.005483	0	0.002543	0
ENST00000541167	ENSG00000127314	RAP1B	0	0.002341	0.005435	0	0.000325	0
ENST00000636246	ENSG00000167371	PRRT2	0	0.000858	0.005399	0	0	0
ENST00000630098	ENSG00000087884	AAMDC	0	0.00038	0.005369	0	0	0
ENST00000449082	ENSG00000185313	SCN10A	0	0	0.005356	0	0	0
ENST00000559155	ENSG00000022976	ZNF839	0.001936	6.6e-05	0.005348	0.000135	0	3.8e-05
ENST00000494668	ENSG00000174944	P2RY14	0	0	0.005347	0	0	0
ENST00000370563	ENSG00000016602	CLCA4	0	0	0.005322	0	0	0
ENST00000442687	ENSG00000239642	MEIKIN	0	0	0.005245	0	0	0
ENST00000642835	ENSG00000177189	RPS6KA3	0	0	0.005227	0	0	0
ENST00000372483	ENSG00000148335	NTMT1	9.6e-05	3e-05	0.005217	0.000624	0.000122	0.000171
ENST00000374459	ENSG00000198915	RASGEF1A	0	0	0.00521	0	0	0
ENST00000329905	ENSG00000185933	CALHM1	0	0	0.005209	0	0	0
ENST00000432688	ENSG00000115556	PLCD4	0	0	0.005199	0	0	0
ENST00000396094	ENSG00000109205	ODAM	0	0	0.005161	0	0	0
ENST00000358524	ENSG00000196844	PATE2	0	0	0.005157	0	0	0
ENST00000217246	ENSG00000172264	MACROD2	0	0	0.005133	0	0	0.001969
ENST00000646859	ENSG00000165899	OTOGL	0	0	0.00511	0	0	0
ENST00000331769	ENSG00000108342	CSF3	0	0	0.005091	0	0	0
ENST00000509835	ENSG00000198589	LRBA	5e-05	0.001978	0.005071	6.1e-05	0.001059	0.001062
ENST00000648263	ENSG00000132535	DLG4	1.6e-05	0	0.005069	0	0	0
ENST00000588860	ENSG00000141646	SMAD4	0	0	0.005046	0	0	0
ENST00000374314	ENSG00000204175	GPRIN2	0	0	0.005038	0	0	0
ENST00000535456	ENSG00000149328	GLB1L2	0	0	0.005036	0	0	0
ENST00000611874	ENSG00000197056	ZMYM1	0	0	0.005019	0	0	0
ENST00000330430	ENSG00000172348	RCAN2	6e-05	0.000336	0.004997	0.00173	0.00012	0.000203
ENST00000342412	ENSG00000101197	BIRC7	0	0	0.004978	0	0	0
ENST00000393699	ENSG00000124818	OPN5	0	0	0.004965	0	0	0
ENST00000421160	ENSG00000173567	ADGRF3	0	0	0.004924	0	0	0
ENST00000628403	ENSG00000064651	SLC12A2	0.000339	0	0.004878	0.000516	0	0
ENST00000399848	ENSG00000168675	LDLRAD4	0	0	0.004864	0	0	0
ENST00000590800	ENSG00000184828	ZBTB7C	0	0	0.004858	0	0	0
ENST00000374253	ENSG00000142675	CNKSR1	0	0	0.004846	0	0	0
ENST00000378111	ENSG00000069424	KCNAB2	0	0	0.004832	0	0	0
ENST00000374837	ENSG00000101460	MAP1LC3A	0	0	0.004807	0	0	0
ENST00000252244	ENSG00000167768	KRT1	0	0	0.004797	0	0	0
ENST00000389887	ENSG00000166105	GLB1L3	0	0	0.004793	0	0	0
ENST00000640803	ENSG00000283967	TAF11L8	0	0	0.004771	0	0	0.000796
ENST00000382152	ENSG00000185774	KCNIP4	0	0.001755	0.004759	0.001986	0	0
ENST00000341184	ENSG00000128268	MGAT3	0	0	0.004753	0	0	0
ENST00000392546	ENSG00000115935	WIPF1	0.000522	0	0.004726	0	0	0.000515
ENST00000480679	ENSG00000169764	UGP2	0	0	0.00472	0	0	0
ENST00000371910	ENSG00000160323	ADAMTS13	0	0	0.004698	0	0	0
ENST00000418646	ENSG00000125772	GPCPD1	0	0	0.004695	0	0	0
ENST00000591028	ENSG00000008441	NFIX	0	0	0.00469	0	0	0
ENST00000295150	ENSG00000186453	FAM228A	0	0	0.004685	0	0	0
ENST00000456197	ENSG00000196367	TRRAP	0.000682	0	0.004654	0.000499	0	0
ENST00000506938	ENSG00000013561	RNF14	0.000106	8.1e-05	0.004626	7.7e-05	0	0
ENST00000340356	ENSG00000203883	SOX18	0	0	0.004589	0	0	0
ENST00000264613	ENSG00000047457	CP	0	0.002588	0.004573	0.001993	0	0
ENST00000594012	ENSG00000198521	ZNF43	0.001411	0	0.00457	0.001873	0	0
ENST00000306904	ENSG00000170748	RBMXL2	0	0	0.00456	0	0	0
ENST00000341294	ENSG00000188425	NANOS2	0	0	0.004555	0	0	0
ENST00000372071	ENSG00000122375	OPN4	0	0	0.004487	0	0	0
ENST00000599845	ENSG00000268916	CSAG3	0	0	0.004476	0	0	0
ENST00000638645	ENSG00000229937	PRPS1L1	0	0	0.004465	0	0	0
ENST00000383490	ENSG00000206432	TMEM200C	0	0	0.004451	0	0	0
ENST00000392861	ENSG00000169554	ZEB2	0	0.000865	0.004442	0	0	0
ENST00000417535	ENSG00000198223	CSF2RA	0	0	0.004371	0	0	0
ENST00000422435	ENSG00000116852	KIF21B	0	0	0.00436	0	0	0
ENST00000373347	ENSG00000116544	DLGAP3	0	0.002122	0.004359	0	0	0
ENST00000209718	ENSG00000108244	KRT23	0	0	0.004301	0	0	0
ENST00000450156	ENSG00000128512	DOCK4	0	0	0.004293	0	0	0
ENST00000320704	ENSG00000181803	OR6S1	0	0	0.00429	0	0	0
ENST00000478136	ENSG00000183662	FAM19A1	0	0	0.004289	0	0	0
ENST00000339490	ENSG00000067177	PHKA1	0	0	0.004245	0	0	0
ENST00000426954	ENSG00000105136	ZNF419	0	0	0.004239	0	0	0
ENST00000373122	ENSG00000095970	TREM2	0	0	0.004232	0	0	0
ENST00000637173	ENSG00000136854	STXBP1	0.000658	0	0.004213	0	0	0.000185
ENST00000641804	ENSG00000188558	OR2G6	0	0	0.004185	0	0	0
ENST00000622803	ENSG00000162825	NBPF20	0	0	0.004163	0	0	0
ENST00000401957	ENSG00000136237	RAPGEF5	0	0	0.004162	0	0	0
ENST00000507285	ENSG00000155158	TTC39B	0	0	0.004157	0	0	0
ENST00000328550	ENSG00000180479	ZNF571	0	0.001358	0.004155	0	0	0
ENST00000542814	ENSG00000123106	CCDC91	0	0	0.004136	0	0	0
ENST00000373876	ENSG00000124006	OBSL1	0	0	0.004136	0	0	0
ENST00000317037	ENSG00000180988	OR52N2	0	0	0.004128	0	0	0
ENST00000342506	ENSG00000187944	C2orf66	0	0	0.004108	0	0	0
ENST00000545985	ENSG00000137700	SLC37A4	0	0.001586	0.00409	0	0.000269	0
ENST00000525107	ENSG00000136153	LMO7	0	0	0.004072	0	0	0
ENST00000236255	ENSG00000158055	GRHL3	0	0	0.00405	0.001575	0	0
ENST00000377485	ENSG00000068831	RASGRP2	0	0	0.00405	0	0	0
ENST00000389362	ENSG00000121335	PRB2	0	0	0.004023	0	0	0
ENST00000560398	ENSG00000028277	POU2F2	0	0.000569	0.004014	0	0	0
ENST00000377497	ENSG00000068831	RASGRP2	0	0	0.004004	0	0	0
ENST00000229829	ENSG00000204252	HLA-DOA	0	0	0.004004	0	0	0
ENST00000521004	ENSG00000135299	ANKRD6	0	0	0.004001	0	0	0
ENST00000409294	ENSG00000138079	SLC3A1	0	0	0.003978	0	0	0
ENST00000650434	ENSG00000156650	KAT6B	0	0	0.00396	0	0	0
ENST00000528338	ENSG00000129167	TPH1	0	0	0.003945	0	0	0
ENST00000512986	ENSG00000052795	FNIP2	0	0	0.003932	0.000385	0	0
ENST00000532919	ENSG00000167323	STIM1	0	0	0.003919	0	0	0
ENST00000537107	ENSG00000235098	ANKRD65	0	0	0.003902	0	0	0
ENST00000628140	ENSG00000171608	PIK3CD	0	0.000783	0.0039	0.001575	0	0
ENST00000306511	ENSG00000124467	PSG8	0	0	0.003878	0	0	0
ENST00000404191	ENSG00000163297	ANTXR2	0	0	0.003858	0	0	0
ENST00000627388	ENSG00000140332	TLE3	0	0	0.003853	0	0	0
ENST00000639393	ENSG00000148795	CYP17A1	0	0	0.00384	0	0	0
ENST00000546271	ENSG00000150991	UBC	0	0	0.003834	0	0	0
ENST00000252242	ENSG00000186081	KRT5	0	0	0.003818	0	0	0
ENST00000515400	ENSG00000109339	MAPK10	0	0	0.003817	0	0	0
ENST00000505212	ENSG00000182585	EPGN	0	0	0.003792	0	0	0
ENST00000290460	ENSG00000159307	SCUBE1	0	0	0.003784	0	0	0
ENST00000433368	ENSG00000096006	CRISP3	0	0	0.003746	0	0	0
ENST00000389313	ENSG00000188176	SMTNL2	0	0	0.003723	0	0	0
ENST00000377073	ENSG00000147117	ZNF157	0	0	0.003686	0	0	0
ENST00000547057	ENSG00000136040	PLXNC1	0.001222	0	0.003655	0	0	0
ENST00000475045	ENSG00000159216	RUNX1	0	0	0.003655	0	0	0
ENST00000318007	ENSG00000163110	PDLIM5	0	0	0.003654	0	0	0
ENST00000390680	ENSG00000132958	TPTE2	0	0	0.003636	0	0	0
ENST00000502892	ENSG00000113580	NR3C1	0	0	0.003634	0	0	0
ENST00000414489	ENSG00000179820	MYADM	0	0	0.003632	0	0	0
ENST00000614491	ENSG00000180155	LYNX1	0	0	0.00363	0	0	0
ENST00000354287	ENSG00000116661	FBXO2	0	0	0.003626	0	0	0
ENST00000642515	ENSG00000157103	SLC6A1	0	0	0.003621	0	0	0
ENST00000550418	ENSG00000078328	RBFOX1	0	0	0.003579	0	0	0
ENST00000373409	ENSG00000244474	UGT1A4	0	0	0.003578	0	0	0
ENST00000378731	ENSG00000205089	CCNI2	0	0	0.003575	0	0	0
ENST00000563262	ENSG00000069974	RAB27A	0	0	0.003571	0	0	0
ENST00000299824	ENSG00000101445	PPP1R16B	0.001124	0	0.003571	0	0	0
ENST00000613726	ENSG00000113430	IRX4	0	0	0.003556	0	0	0
ENST00000580446	ENSG00000141551	CSNK1D	0	0.002304	0.003524	0	0.000249	0.000108
ENST00000416929	ENSG00000232030	MAGEB6B	0	0	0.003491	0	0.002143	0
ENST00000560817	ENSG00000103740	ACSBG1	0	0	0.003482	0	0	0
ENST00000512047	ENSG00000229924	FAM90A26	0	0	0.003429	0	0	0
ENST00000382303	ENSG00000107104	KANK1	0	0.002277	0.003424	0.000628	0	0
ENST00000606109	ENSG00000203786	KPRP	0	0.001852	0.003418	0	0	0
ENST00000464747	ENSG00000116044	NFE2L2	0	0	0.003396	0	0	0
ENST00000646119	ENSG00000127990	SGCE	0.001583	0	0.003384	0	0.00128	0
ENST00000592007	ENSG00000167642	SPINT2	0	0	0.003376	0	0	0
ENST00000315520	ENSG00000086159	AQP6	0	0	0.003359	0	0	0
ENST00000324938	ENSG00000072163	LIMS2	0	0	0.003347	0	0	0
ENST00000361737	ENSG00000163995	ABLIM2	0	0	0.003337	0	0	0
ENST00000652433	ENSG00000105519	CAPS	8.6e-05	0.000103	0.003322	0	0.000145	0.000105
ENST00000464260	ENSG00000163590	PPM1L	0	0.001278	0.00332	0	0	0
ENST00000265417	ENSG00000069122	ADGRF5	0	0	0.003316	0	0	0
ENST00000296271	ENSG00000163914	RHO	0	0	0.003297	0	0	0
ENST00000623806	ENSG00000268606	MAGEA2	0	0	0.003294	0	0	0.000978
ENST00000645361	ENSG00000100197	CYP2D6	0	0	0.003271	0	0	0
ENST00000615926	ENSG00000116580	GON4L	0	0.00026	0.00322	0.001258	0	0
ENST00000391767	ENSG00000105605	CACNG7	0	0	0.00319	0	0	0
ENST00000571990	ENSG00000177374	HIC1	0	0	0.003187	0	0	0
ENST00000331251	ENSG00000183729	NPBWR1	0	0.001393	0.00318	0	0	0
ENST00000430432	ENSG00000153814	JAZF1	0	0	0.003143	0	0	0
ENST00000510055	ENSG00000248144	ADH1C	0	0	0.003136	0	0	0
ENST00000368059	ENSG00000162739	SLAMF6	0	0	0.003105	0	0	0
ENST00000560676	ENSG00000170776	AKAP13	0	0	0.003084	0	0	0
ENST00000555019	ENSG00000100628	ASB2	0	0	0.003077	0	0	0
ENST00000570836	ENSG00000161905	ALOX15	0	0	0.003069	0	0	0
ENST00000329397	ENSG00000184489	PTP4A3	0	0	0.003068	0	0	0
ENST00000381480	ENSG00000205744	DENND1C	0	0	0.003057	0	0	0
ENST00000535709	ENSG00000170180	GYPA	0	0	0.003052	0	0	0
ENST00000626868	ENSG00000135624	CCT7	0	0	0.003036	0	0	0
ENST00000330949	ENSG00000182968	SOX1	0	0	0.003007	0	0	0
ENST00000426592	ENSG00000163565	IFI16	0	0	0.002994	0	0	0
ENST00000370683	ENSG00000022267	FHL1	0	0	0.002993	0	0	0
ENST00000543264	ENSG00000105251	SHD	0	0	0.002989	0	0	0
ENST00000507330	ENSG00000196455	PIK3R4	0	0	0.002985	0	0	0
ENST00000514921	ENSG00000146147	MLIP	0	0.001449	0.002976	0	0	0
ENST00000568673	ENSG00000196628	TCF4	0	0	0.002962	0	0.000928	0
ENST00000374217	ENSG00000158062	UBXN11	0	0	0.002945	0	0	0
ENST00000360274	ENSG00000188191	PRKAR1B	0	0	0.002893	0	0	0
ENST00000282878	ENSG00000152932	RAB3C	0.000423	0	0.002887	0	9.5e-05	0
ENST00000592610	ENSG00000214456	PLIN5	0	0.002172	0.002874	0	0	0
ENST00000640815	ENSG00000164199	ADGRV1	0	0	0.002845	0	0	0
ENST00000460170	ENSG00000060656	PTPRU	0.000115	0	0.002799	0	0	0
ENST00000397541	ENSG00000214102	WEE2	0	0	0.002792	0	0	0
ENST00000640992	ENSG00000115525	ST3GAL5	0	0	0.002786	0	0	0
ENST00000639382	ENSG00000124155	PIGT	0	0	0.002784	0	0	0
ENST00000478076	ENSG00000065809	FAM107B	0	0	0.00277	0	0	0
ENST00000641311	ENSG00000181767	OR8H2	0	0	0.002764	0	0	0
ENST00000581878	ENSG00000197971	MBP	0	0	0.00276	0	0	0
ENST00000529167	ENSG00000183644	C11orf88	0	0	0.002748	0	0	0
ENST00000250863	ENSG00000092345	DAZL	0	0	0.002744	0	0	0
ENST00000641329	ENSG00000170605	OR9K2	0	0	0.002739	0	0	0
ENST00000530004	ENSG00000085831	TTC39A	0	0	0.002738	0	0	0
ENST00000319595	ENSG00000179097	HTR1F	0	0	0.002721	0	0	0
ENST00000486257	ENSG00000181847	TIGIT	0	0	0.002714	0	0	0
ENST00000426783	ENSG00000157578	LCA5L	0	0	0.002683	0	0	0
ENST00000475839	ENSG00000153266	FEZF2	0	0	0.002675	0	0	0
ENST00000511648	ENSG00000154920	EME1	0	0	0.002671	0	0	0.000664
ENST00000367858	ENSG00000118515	SGK1	0	0.000936	0.00267	0	0	0
ENST00000339313	ENSG00000142512	SIGLEC10	0	0	0.002642	0	0	0
ENST00000583370	ENSG00000141068	KSR1	0	0	0.002627	0	0	0
ENST00000421412	ENSG00000163701	IL17RE	0	0	0.002605	0	0	0
ENST00000355301	ENSG00000144061	NPHP1	0	0	0.002593	0	0	0
ENST00000264731	ENSG00000073282	TP63	0	0	0.002593	0	0	0
ENST00000425570	ENSG00000196724	ZNF418	0	0	0.002567	0	0	0
ENST00000285928	ENSG00000155530	LRGUK	0	0	0.002547	0	0	0
ENST00000595464	ENSG00000134830	C5AR2	0	0	0.002525	0	0	0
ENST00000636151	ENSG00000255274	SMIM35	0	0	0.002515	0	0	0
ENST00000300098	ENSG00000166856	GPR182	0	0	0.002505	0	0	0
ENST00000368024	ENSG00000215845	TSTD1	0	0	0.0025	0	0	0
ENST00000300061	ENSG00000166828	SCNN1G	0	0	0.002458	0	0	0
ENST00000355522	ENSG00000198535	C2CD4A	0	0	0.002456	0	0	0
ENST00000409123	ENSG00000122574	WIPF3	0	0	0.002448	0	0	0
ENST00000644779	ENSG00000110436	SLC1A2	0	0	0.002418	0	0	0
ENST00000287820	ENSG00000132170	PPARG	0	0	0.002404	0	0	0
ENST00000641817	ENSG00000197428	OR51D1	0	0	0.0024	0	0	0
ENST00000538328	ENSG00000171631	P2RY6	0	0	0.002399	0	0	0
ENST00000650076	ENSG00000147099	HDAC8	0	0	0.002396	0	0.000937	0
ENST00000445546	ENSG00000151690	MFSD6	0	0	0.002378	0	0	0
ENST00000568374	ENSG00000140400	MAN2C1	0	0	0.002375	0	0	0
ENST00000333478	ENSG00000173567	ADGRF3	0	0	0.002362	0	0	0
ENST00000443889	ENSG00000138002	IFT172	0	0	0.002354	0	0	0
ENST00000378099	ENSG00000196511	TPK1	0	0	0.002342	0	0	0
ENST00000379460	ENSG00000088826	SMOX	0	0	0.002339	0	0	0
ENST00000479530	ENSG00000121440	PDZRN3	0	0	0.002332	0	0	0
ENST00000411974	ENSG00000100031	GGT1	0	0	0.002316	0	0	0
ENST00000614008	ENSG00000000003	TSPAN6	0.00035	0.000185	0.002305	0.000567	0	0.000218
ENST00000343936	ENSG00000188177	ZC3H6	0	0	0.002296	0	0	0
ENST00000366952	ENSG00000112499	SLC22A2	0	0	0.002287	0	0	0
ENST00000611984	ENSG00000090612	ZNF268	0	0	0.002277	0	0	0
ENST00000512271	ENSG00000109794	FAM149A	0	0	0.002271	0	0	0
ENST00000308611	ENSG00000163606	CD200R1	0	0	0.00227	0	0	0
ENST00000570142	ENSG00000167191	GPRC5B	0	0	0.002265	0	0	0
ENST00000637083	ENSG00000182372	CLN8	0	0	0.00226	0.001324	0	0
ENST00000290472	ENSG00000159337	PLA2G4D	0	0	0.002257	0	0	0
ENST00000646290	ENSG00000145832	SLC25A48	0	0	0.002248	0	0	0
ENST00000339463	ENSG00000165702	GFI1B	0	0	0.002248	0	0	0
ENST00000372141	ENSG00000185737	NRG3	0	0	0.002242	0	0	0
ENST00000285600	ENSG00000155249	OR4K1	0	0	0.00224	0	0	0
ENST00000392753	ENSG00000153250	RBMS1	0	0	0.002215	0.000138	0	0
ENST00000357546	ENSG00000073737	DHRS9	0	0	0.002214	0	0	0
ENST00000327669	ENSG00000184731	FAM110C	0	0	0.002202	0	0	0
ENST00000527387	ENSG00000109971	HSPA8	0	0	0.002199	0	0	0
ENST00000316470	ENSG00000143994	ABHD1	0	0	0.002185	0.000282	0	0
ENST00000591708	ENSG00000095932	SMIM24	0.000146	8.9e-05	0.00217	0	0	0
ENST00000372017	ENSG00000173267	SNCG	0	0	0.002146	0	0	0
ENST00000310581	ENSG00000164362	TERT	0	0	0.002127	0	0	0
ENST00000482062	ENSG00000106852	LHX6	0.000218	0	0.002122	0	0.00053	0.000123
ENST00000312442	ENSG00000173401	GLIPR1L1	0	0	0.002114	0	0	0
ENST00000605424	ENSG00000271447	MMP28	0	0	0.002102	0	0	0
ENST00000394942	ENSG00000140006	WDR89	0	0	0.002094	0	0	0
ENST00000619828	ENSG00000278023	RDM1	0	0	0.002089	0	0	0
ENST00000626796	ENSG00000134058	CDK7	0	0.000406	0.002084	0	0.000836	0
ENST00000629372	ENSG00000281106	TMEM272	0	0	0.002058	0	0	0.000734
ENST00000409868	ENSG00000204843	DCTN1	0	0	0.002054	0	0	0
ENST00000529750	ENSG00000023171	GRAMD1B	0.000415	0.000394	0.002047	0.000212	0.000483	0.000107
ENST00000581675	ENSG00000005379	TSPOAP1	0	0	0.002035	0	0	0
ENST00000455476	ENSG00000183023	SLC8A1	0	0	0.002024	0	0	0
ENST00000641900	ENSG00000180934	OR56A1	0	0	0.002023	0	0	0
ENST00000599371	ENSG00000243137	PSG4	0	0	0.002022	0	0	0
ENST00000367295	ENSG00000134369	NAV1	0	0	0.002021	0	0.000634	0
ENST00000583381	ENSG00000109084	TMEM97	0	0	0.002015	0	0	0
ENST00000287859	ENSG00000157181	ODR4	0	0	0.001998	0	0	0
ENST00000388934	ENSG00000172478	MAB21L4	0	0	0.001977	0	0	0
ENST00000531481	ENSG00000186714	CCDC73	0	0	0.001951	0	0	0
ENST00000421688	ENSG00000204278	TMEM235	0	0	0.001937	0	0	0
ENST00000359358	ENSG00000197705	KLHL14	0	0	0.001936	0	0	0
ENST00000538027	ENSG00000151062	CACNA2D4	0	0	0.001935	0.000558	0	0
ENST00000619527	ENSG00000148948	LRRC4C	0.000437	2e-06	0.001933	4.6e-05	0.000405	0
ENST00000258187	ENSG00000103034	NDRG4	0	0	0.00192	0	0	0
ENST00000553885	ENSG00000042317	SPATA7	0	0	0.001911	0	0	0
ENST00000433762	ENSG00000163359	COL6A3	0	0	0.001909	0	0	0
ENST00000519639	ENSG00000176623	RMDN1	0	0.000513	0.001896	0	0	0.000747
ENST00000541134	ENSG00000095951	HIVEP1	0	0	0.00189	0	0	0
ENST00000415229	ENSG00000162174	ASRGL1	0	0	0.001876	0	0	0
[truncated: 207 more rows]

## Sheet: mRNA_No UV_cluster 3_GOenrich
Category	ID	Description	GeneRatio	BgRatio	pvalue	padj	geneID	Count
CC	GO:0005912	adherens junction	73/1718	467/17410	4.91327e-05	0.00697991	CAPN1/FHL1/VIM/CD44/CTNNA1/LIMA1/BCAR1/SYNE2/CDH3/SLC9A3R2/FGFR3/LIMS2/ACTB/TNS1/EPB41L2/KEAP1/ITGB5/TRIP6/RPLP0/SNAP23/SORBS1/NRP1/PROCR/CD99L2/ARHGEF7/RPS19/CAV1/HSPA8/LIN7A/RND3/RPL22/DOCK7/CNN3/PDLIM2/ADGRE5/STX16/AHNAK/KDM4B/CNN1/MLLT4/ARPC1B/FLOT2/ANXA1/LMO7/ITGA11/SHROOM3/RPL13A/S100A7/NPHP1/CASK/MSN/RSU1/ITGB1/ADAM17/DST/CSRP1/SPTBN4/CLASP2/YWHAZ/PLEKHA7/CTNNB1/DAG1/PEAK1/RPL4/NPM1/TIGIT/…	73
CC	GO:0005874	microtubule	62/1718	381/17410	5.49149e-05	0.00697991	KRIT1/ZNF207/STAU2/MAP4/SIRT2/KCNAB2/MAPRE3/WDR47/AURKA/DYNLL1/HDAC6/MAP1LC3A/TBL1X/CLIP2/ARL6/APC2/KIF21B/KIF14/NEK6/EML2/MTUS1/CLIP1/NAV1/CCT7/DYNC1LI2/CDK5RAP2/LRRC49/SHROOM3/GABARAPL1/GAS8/CSNK1D/IQGAP2/TRIM55/SYBU/HAUS6/CCT5/DST/CCT8/DYNC1I1/DISC1/CLASP2/KATNAL2/STIM1/WDR81/CDK1/TCP11L1/RMDN1/TBL1XR1/SLC8A1/CEP57L1/TUBA8/SEPT9/FAM110C/DNAH14/MAPT/DNM3/CALM1/CALM2/DCTN1/HAUS3/KIFC1/TUBB3	62
CC	GO:0005925	focal adhesion	63/1718	389/17410	5.54687e-05	0.00697991	CAPN1/FHL1/VIM/CD44/CTNNA1/LIMA1/BCAR1/SYNE2/SLC9A3R2/FGFR3/LIMS2/ACTB/TNS1/EPB41L2/KEAP1/ITGB5/TRIP6/RPLP0/SNAP23/SORBS1/NRP1/PROCR/CD99L2/ARHGEF7/RPS19/CAV1/HSPA8/RND3/RPL22/DOCK7/CNN3/PDLIM2/ADGRE5/STX16/AHNAK/KDM4B/CNN1/ARPC1B/FLOT2/ANXA1/LMO7/ITGA11/RPL13A/S100A7/CASK/MSN/RSU1/ITGB1/ADAM17/DST/CSRP1/CLASP2/YWHAZ/CTNNB1/DAG1/PEAK1/RPL4/NPM1/FES/P4HB/MME/PDLIM7/LIMS1	63
CC	GO:0070161	anchoring junction	75/1718	485/17410	5.59953e-05	0.00697991	CAPN1/FHL1/VIM/CD44/CTNNA1/LIMA1/BCAR1/SYNE2/CDH3/SLC9A3R2/FGFR3/LIMS2/ACTB/TNS1/EPB41L2/KEAP1/ITGB5/TRIP6/RPLP0/SNAP23/SORBS1/NRP1/PROCR/CD99L2/ARHGEF7/RPS19/CAV1/HSPA8/LIN7A/RND3/RPL22/DOCK7/CNN3/PDLIM2/ADGRE5/STX16/AHNAK/KDM4B/CNN1/MLLT4/ARPC1B/FLOT2/DSG3/ANXA1/LMO7/ITGA11/SHROOM3/RPL13A/S100A7/NPHP1/CASK/MSN/RSU1/ITGB1/ADAM17/DST/CSRP1/SPTBN4/CLASP2/YWHAZ/PLEKHA7/CTNNB1/DAG1/PEAK1/RPL4/NPM1/T…	75
CC	GO:0030055	cell-substrate junction	64/1718	398/17410	6.03798e-05	0.00697991	CAPN1/FHL1/VIM/CD44/CTNNA1/LIMA1/BCAR1/SYNE2/SLC9A3R2/FGFR3/LIMS2/ACTB/TNS1/EPB41L2/KEAP1/ITGB5/TRIP6/RPLP0/SNAP23/SORBS1/NRP1/PROCR/CD99L2/ARHGEF7/RPS19/CAV1/HSPA8/RND3/RPL22/DOCK7/CNN3/PDLIM2/ADGRE5/STX16/AHNAK/KDM4B/CNN1/ARPC1B/ITGB4/FLOT2/ANXA1/LMO7/ITGA11/RPL13A/S100A7/CASK/MSN/RSU1/ITGB1/ADAM17/DST/CSRP1/CLASP2/YWHAZ/CTNNB1/DAG1/PEAK1/RPL4/NPM1/FES/P4HB/MME/PDLIM7/LIMS1	64
CC	GO:0005924	cell-substrate adherens junction	63/1718	394/17410	8.12873e-05	0.00783068	CAPN1/FHL1/VIM/CD44/CTNNA1/LIMA1/BCAR1/SYNE2/SLC9A3R2/FGFR3/LIMS2/ACTB/TNS1/EPB41L2/KEAP1/ITGB5/TRIP6/RPLP0/SNAP23/SORBS1/NRP1/PROCR/CD99L2/ARHGEF7/RPS19/CAV1/HSPA8/RND3/RPL22/DOCK7/CNN3/PDLIM2/ADGRE5/STX16/AHNAK/KDM4B/CNN1/ARPC1B/FLOT2/ANXA1/LMO7/ITGA11/RPL13A/S100A7/CASK/MSN/RSU1/ITGB1/ADAM17/DST/CSRP1/CLASP2/YWHAZ/CTNNB1/DAG1/PEAK1/RPL4/NPM1/FES/P4HB/MME/PDLIM7/LIMS1	63
CC	GO:0005938	cell cortex	41/1718	232/17410	0.000163982	0.0135403	SCIN/HFE/RAI14/PDZD4/FRY/ACTB/EPB41L2/OSBPL8/ARHGEF7/CORO1A/AKT2/CAV1/WIPF1/PLS1/PDLIM2/WIPF3/COL10A1/DLG4/FLOT2/DBNL/TCHP/CNKSR1/EXOC6B/ADD3/DST/DMTN/EPB41/SPTBN4/CLASP2/MELK/TSC1/STIM1/WDR81/CTNNB1/SEPT2/EXOC3L1/MYADM/ANXA2/SEPT5/FAM110C/NF2	41
