# Supplementary material for: lncRNA-ZFAS1, an emerging gate-keeper in DNA damage-dependent transcriptional regulation
Source: Research Square preprint supplement (doi:10.21203/rs.3.rs-3233912/v1), 2023-09-13
Supplement: Supplementary file 10 [file f00e909d9d92da47e0dbde34.xlsx]

## Sheet: Oligonucleotides
Oligos for qPCR
CCNA_mRNA_forward		ACATGGATGAACTAGAGCAGGG
CCNA_mRNA_reverse		GAGTGTGCCGGTGTCTACTT
CCNB_mRNA_forward		TAAGGCGAAGATCAACATGGC
CCNB_mRNA_reverse		TGTTACCAATGTCCCCAAGAG
hKIFAP3_Ex-In1_forward		CAAGGGGAGGACGCCAGATA
hKIFAP3_Ex-In1_reverse		GCTAAACTAGCGTTGCCCAG
hKIFAP3_Ex-In8_forward		ACCAGGGGCTTGTGGTAAAA
hKIFAP3_Ex-In8_reverse		TGTTGCTTTCCTCATTGCTTAGG
hKIFAP3_Ex-In19_forward		CCCTGCTAGGAAGAGAATCTTGGT
hKIFAP3_Ex-In19_reverse		TGGTTGGCCAAAGCCATCCATT
hGAPDH_forward		TGCACCACCAACTGCTTAGC
hGAPDH_reverse		GGCATGGACTGTGGTCATGAG
SNHG15_qPCR_forward		ACACCTAGTGAGGAGTGGAGC
SNHG15_qPCR_reverse		AAGGGCAACAAGCGAGGTTT
SLC25A34-AS1_qPCR_forward		CCTGTGCCCACCTAACTGAG
SLC25A34-AS1_qPCR_reverse		AATGTGCTCTGTTCCCTCCG
ZFAS1_qPCR_forward		CCCGGAGTGTGGTACTTCTC
ZFAS1_qPCR_reverse		AAAACGGGAACTTACGGGCA
ATF3_qPCR_forward		AGGATTCAGGCAGCAGTGTC
ATF3_qPCR_reverse		AGTGACAATGGTAGCCACGG
mZfas1_forward		CTACATTTCCCAGGACGCCAAG
mZfas1_reverse		GGGACGAGACATATCGGGAAC
mZnfx1_forward		AGACCAATAACCCAGCAGCC
mZnfx1_reverse		TCCATCCATCTCAGAGGCCA
mKifap3_Ex-In1_forward		AGTAGCCCTCCCAGATTCTCA
mKifap3_Ex-In1_reverse		AACACCTAAGGACCTGCTCA
mKifap3_Ex-In19_forward		AGCAGCTTCTAACCTGCCTTTC
mKifap3_Ex-In19_reverse		AGTAGTAAGGTTCGTCAGGGC
Oligos for ChIP-qPCR
ZFAS1_ChIP_-3_F		GGGGCTAAGGAAAGAGTGGG
ZFAS1_ChIP_-3_R		AGCTGCCCCTCATATAATGCC
ZFAS1_ChIP_-2_F		TGAGTAGGCGATGGAGGTCT
ZFAS1_ChIP_-2_R		AGCCTTGTCACCTCTTTGGC
ZFAS1_ChIP_-1_F		GGCCTGGACAACTACTAGAGC
ZFAS1_ChIP_-1_R		GGACCCGAAACGCTCTCTTT
ZFAS1_ChIP_0_F		CCGGAGTGTGGTACTTCTCC
ZFAS1_ChIP_0_R		TCACCACACACAAAACGGGA
ZFAS1_ChIP_1_F		AGACCTCTGGTCCTCCCTTC
ZFAS1_ChIP_1_R		TTTGGGGTCAGAGACGGAGA
ZFAS1_ChIP_2_F		TTCTTCCTGTGTGTTGGGGC
ZFAS1_ChIP_2_R		GTAGTCGGGCACTGGTTTGA
ZFAS1_ChIP_3_F		CCCTAGTGGGCAGTTGGTTT
ZFAS1_ChIP_3_R		CAGAAGCCAATCACGAGGCA
ZFAS1_ChIP_4_F		GGGACCTCTAGATTTCTAAAATGA
ZFAS1_ChIP_4_R		TGAGCAAGCCAAGGAGAATGA
ZFAS1_ChIP_5_F		ACTTAGTGCCTAACAGGTACTGC
ZFAS1_ChIP_5_R		CATGCTCTGCCACTTAACAGC
Oligos for 6mA-IP-qPCR
ZFAS1_6mA_F		GGGCATCTAGCTGATGGGAG
ZFAS1_6mA_R		CAGCTACTACCCCCTCCAGA
ACTIN_6mA_F		GCTGTTCCAGGCTCTGTTCC
ACTIN_6mA_R		ATGCTCACACGCCACAACATG
Cloning of plasmids
pCMV6-Entry-ZFAS1-FL-F		CCGGCGATCGCGCCACCGCTTTCGCGTCTGCGGTGCT
pCMV6-Entry-ZFAS1-FL-R		CGACGCGTTTTATTTTCTTTATGCAGGT
pCMV6-Entry-ZFAS1-pORF-F		CCGGCGATCGCGCCACCCTGCGGTGCTCGGAGTGTGG
pCMV6-Entry-ZFAS1-pORF-R		CGACGCGTGGAGATCGAAGGTTGTAGAT
pCMV6-Entry-ACTB-F		CCGGCGATCGCGCCACCATGGATGATGATATCGCCGC
pCMV6-Entry-ACTB-R		CGACGCGTGAAGCATTTGCGGTGGACGA
Oligos for ZFAS1 5'/3' RACE
ZFAS1_5‘RACE_GSP1		GATTACGCCAAGCTTCAATGACATTCTTGAAGTGGGCACAGCC
ZFAS1_3'RACE_GSP2		GATTACGCCAAGCTTCGCTATTGTCCTGCCCGTAAGTTCCCG
Oligos for Zfas1 KO mouse genotyping
Zfas1_GT_P1_forward		AAAGTAGGCCCAGGCAAGTTGAC
Zfas1_GT_P1_reverse		ATGATGCCCTTCTTATGCCTGTG
Zfas1_GT_P2_forward		AAAGTAGGCCCAGGCAAGTTGAC
Zfas1_GT_P2_reverse		CTCAGGAGTTCACGCTCCATTC

## Sheet: ChIRP probes
ZFAS1 ChIRP probes
Even Pool
5'-CTAGGAGAAGTACCACACTC-3'
5'-TGACTCCCTCTTCCAAAATC-3'
5'-GTTCAATCAAAGCCTGGTT-3'
5'-CAACACACACTGGTACACGT-3'
5'-CTGTCCTTTTCTTTCCAGAG-3'
5'-GCACAGCCTTTTAAACTCAG-3'
Odd Pool
5'-TATGAAGCCTGACTGCAACT-3'
5'-TTCCTTGGAGGTCCAGTGGT-3'
5'-TTCCAACACCCGCATTCATC-3'
5'-ACAAGGCAGACTGAATCAAG-3'
5'-CTGGTTCAGCCAGATCTTCA-3'
5'-TTCTTTATGCAGGTAGGCAG-3'
